# Supplementary material for: Inhibiting host-protein deposition on urinary catheters reduces associated urinary tract infections
Source: eLife journal article supplement (doi:10.7554/elife.75798), 2022-03-26

Intensities Before Normalisation

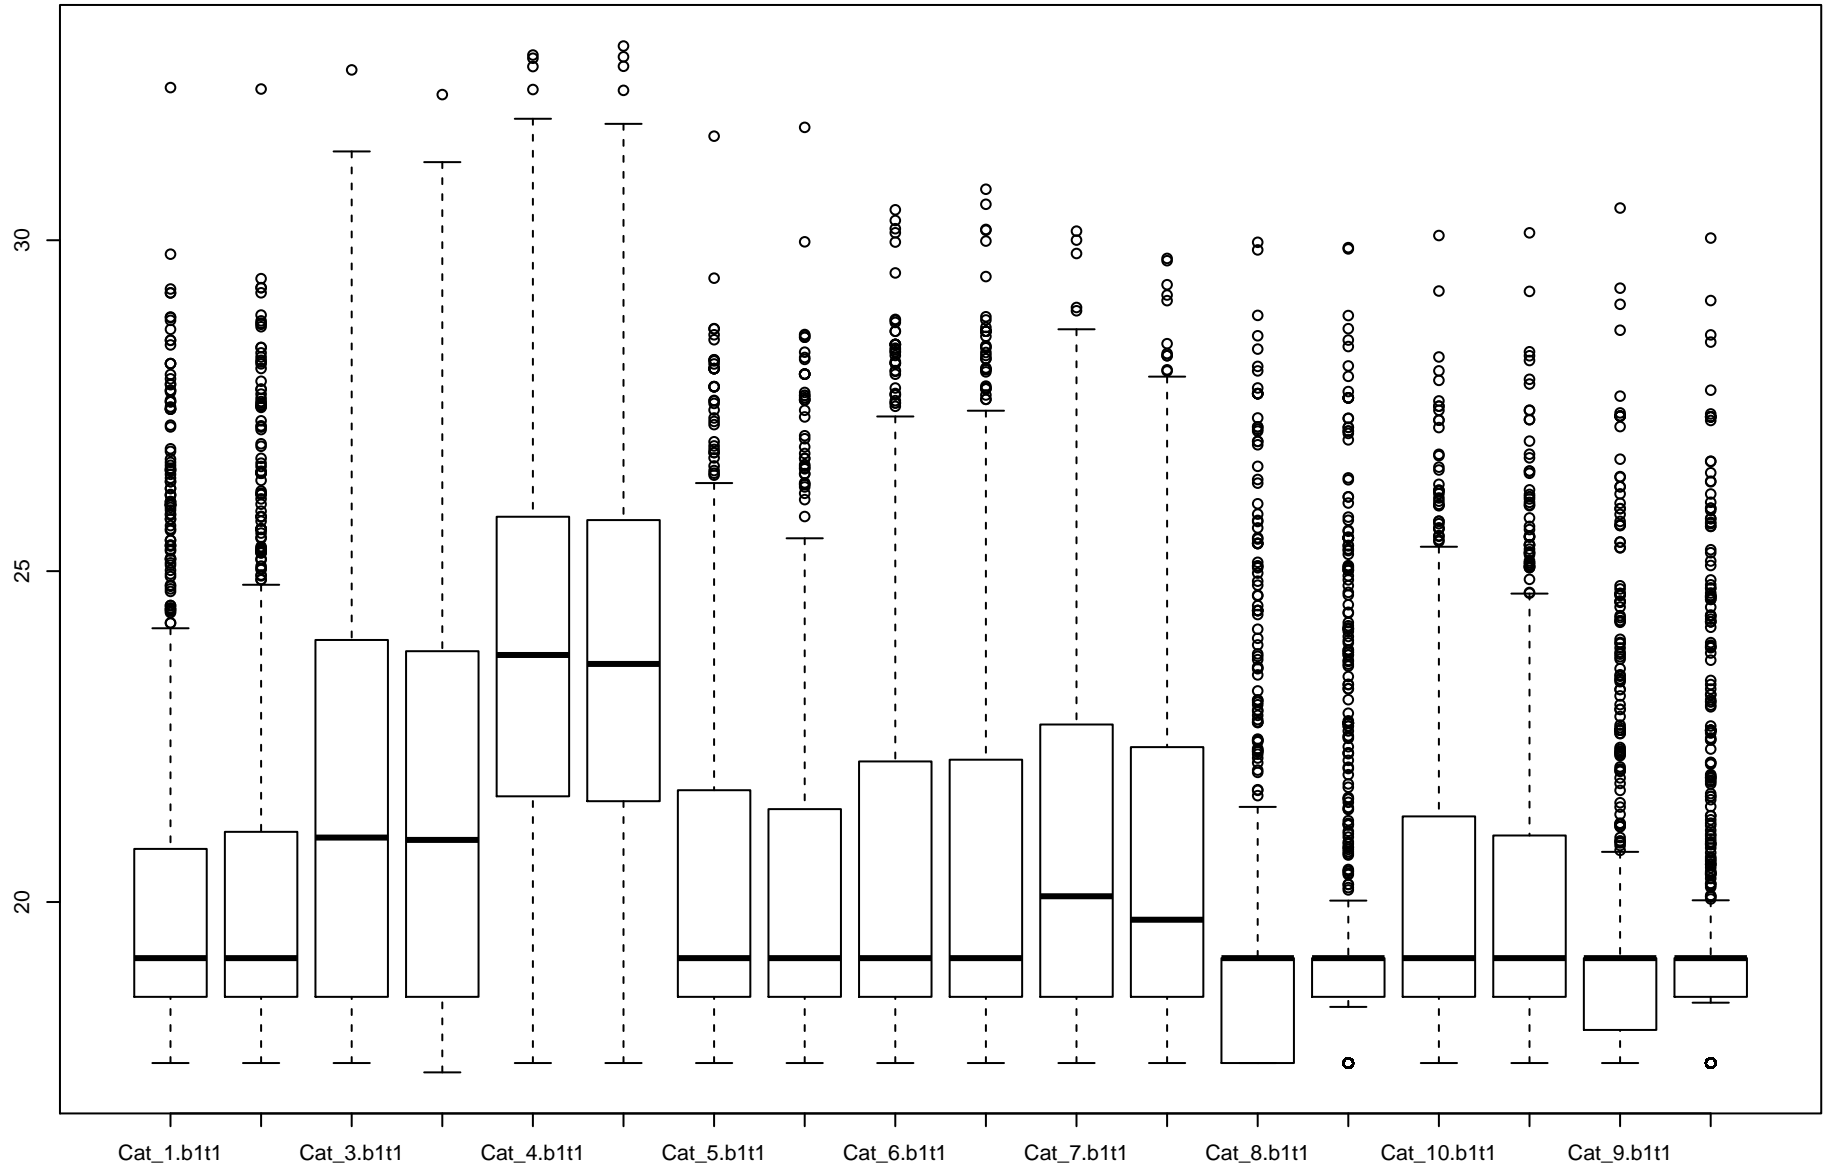

Intensities After Normalisation

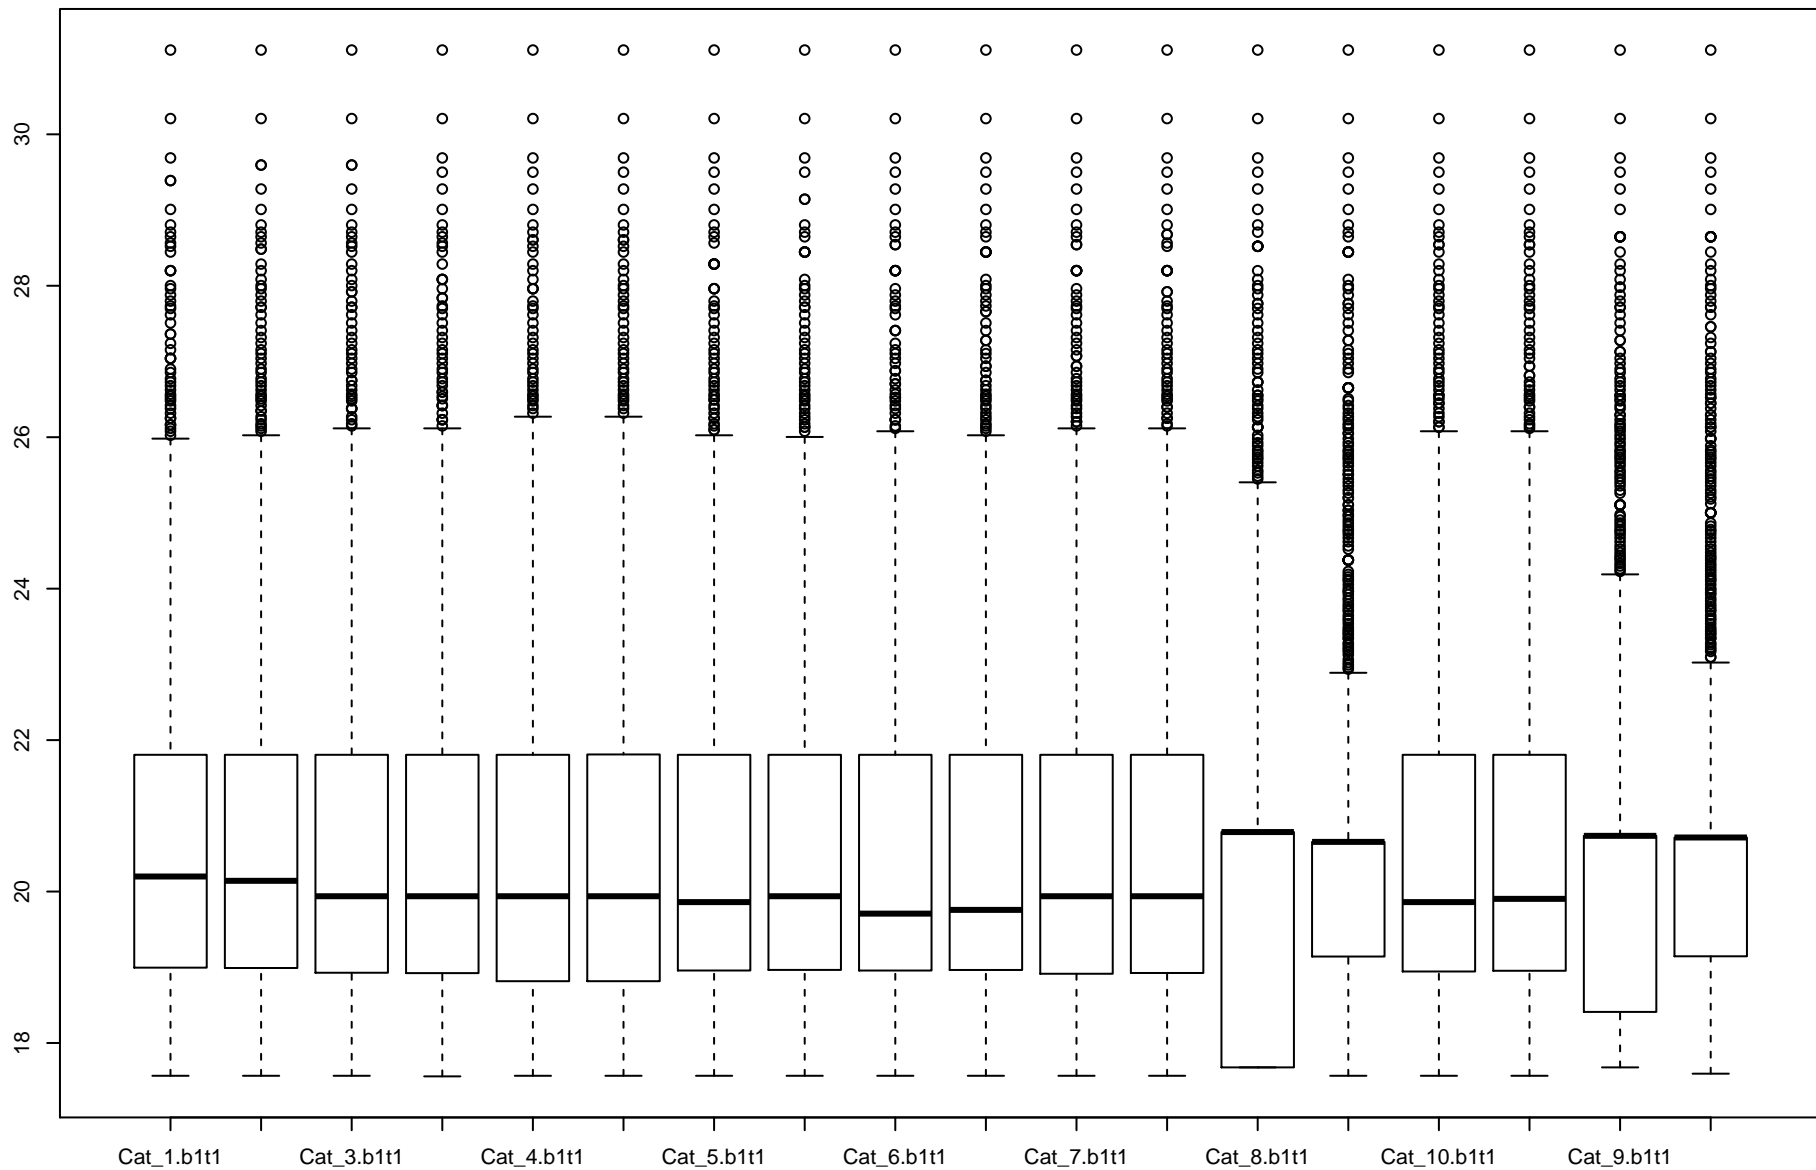

Log2 Fold Change Cat\_3/Cat\_1

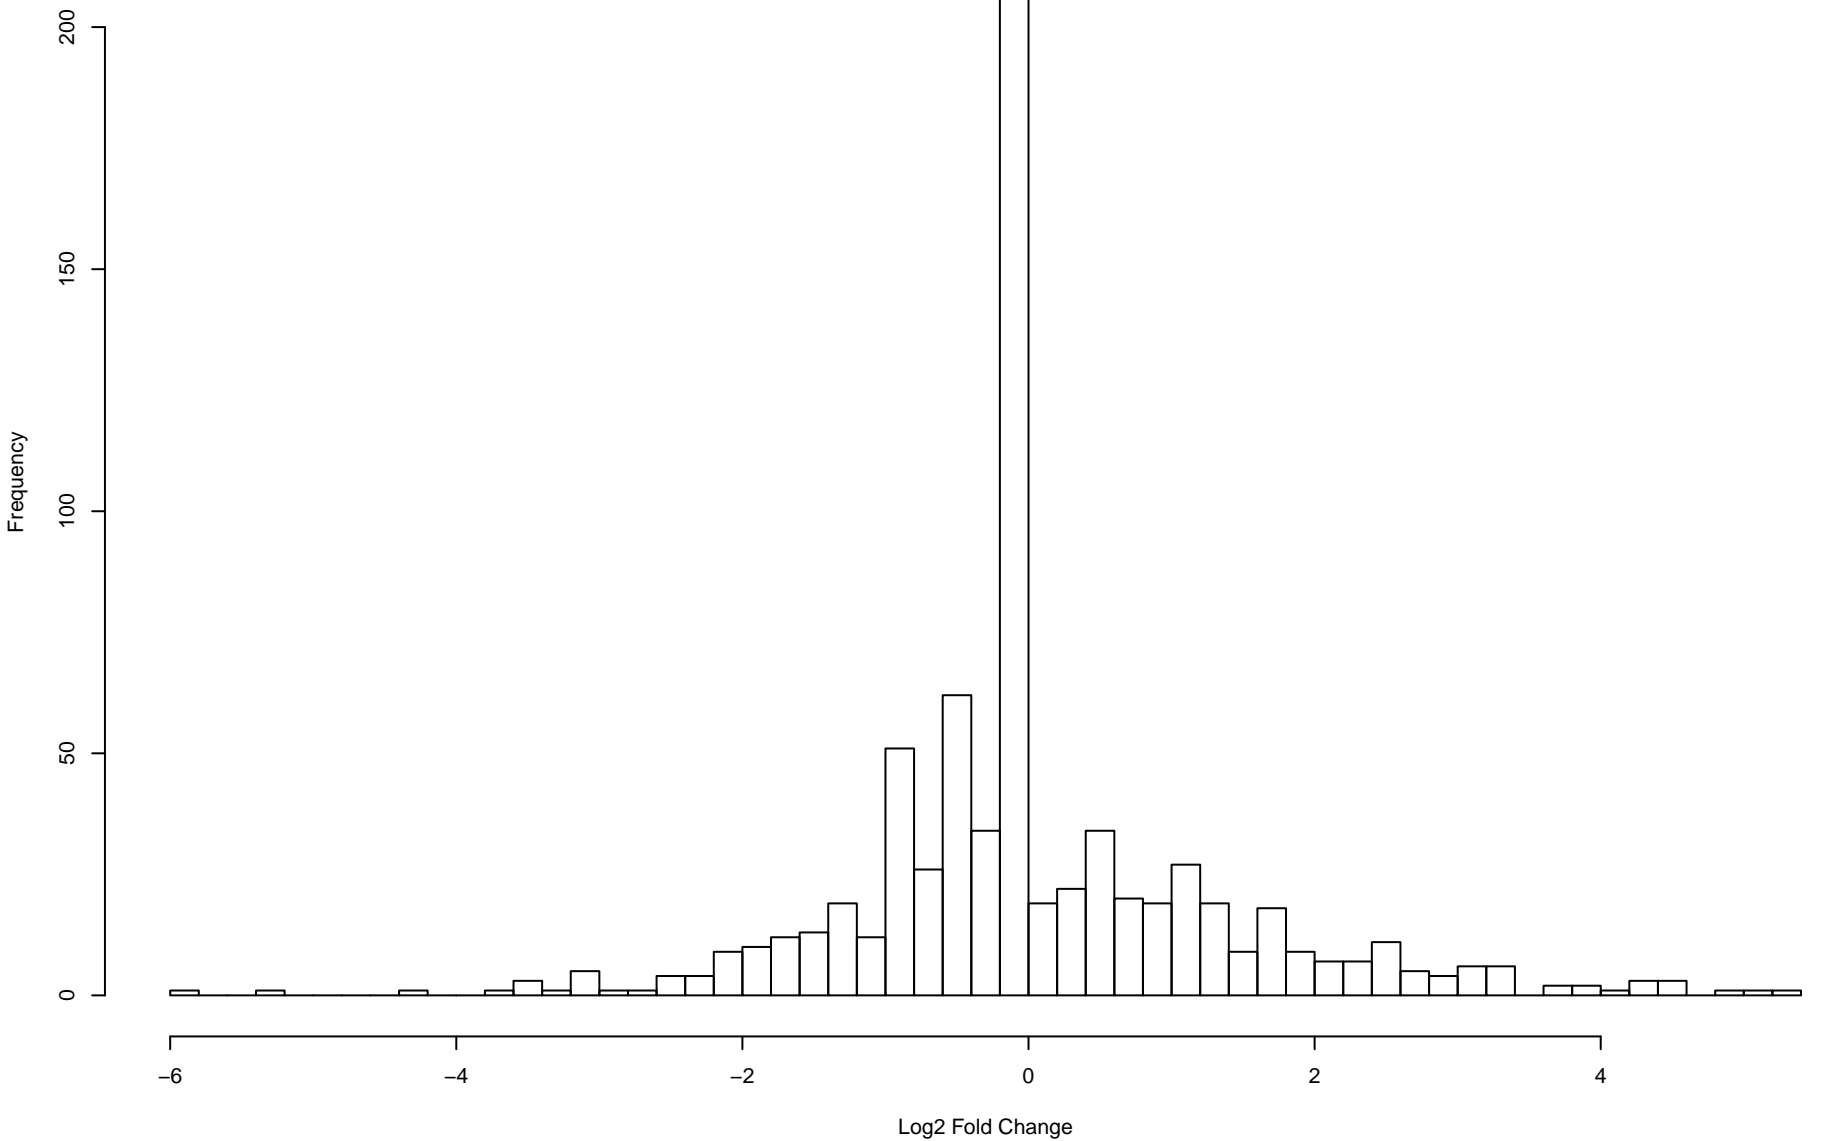

Log2 Fold Change Cat\_4/Cat\_1

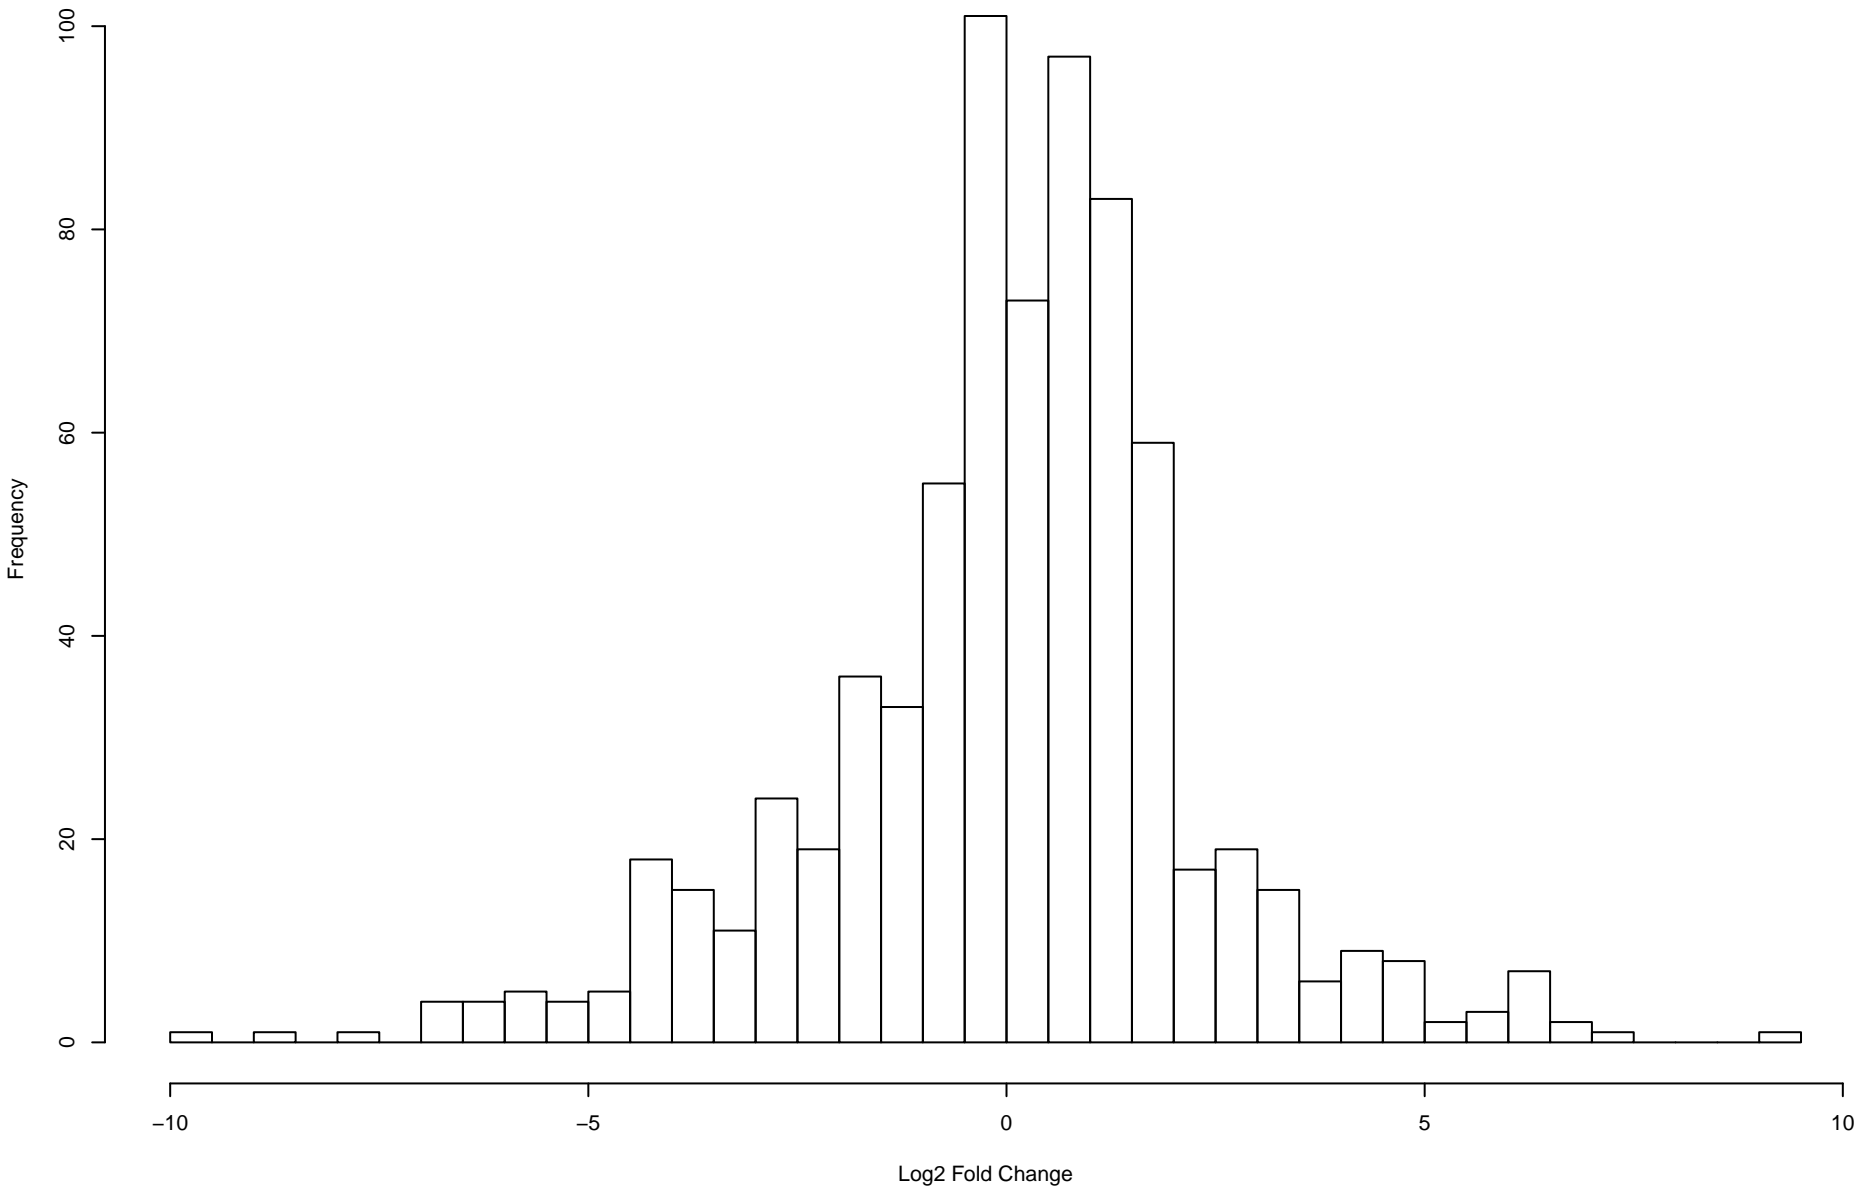

Log2 Fold Change Cat\_5/Cat\_1

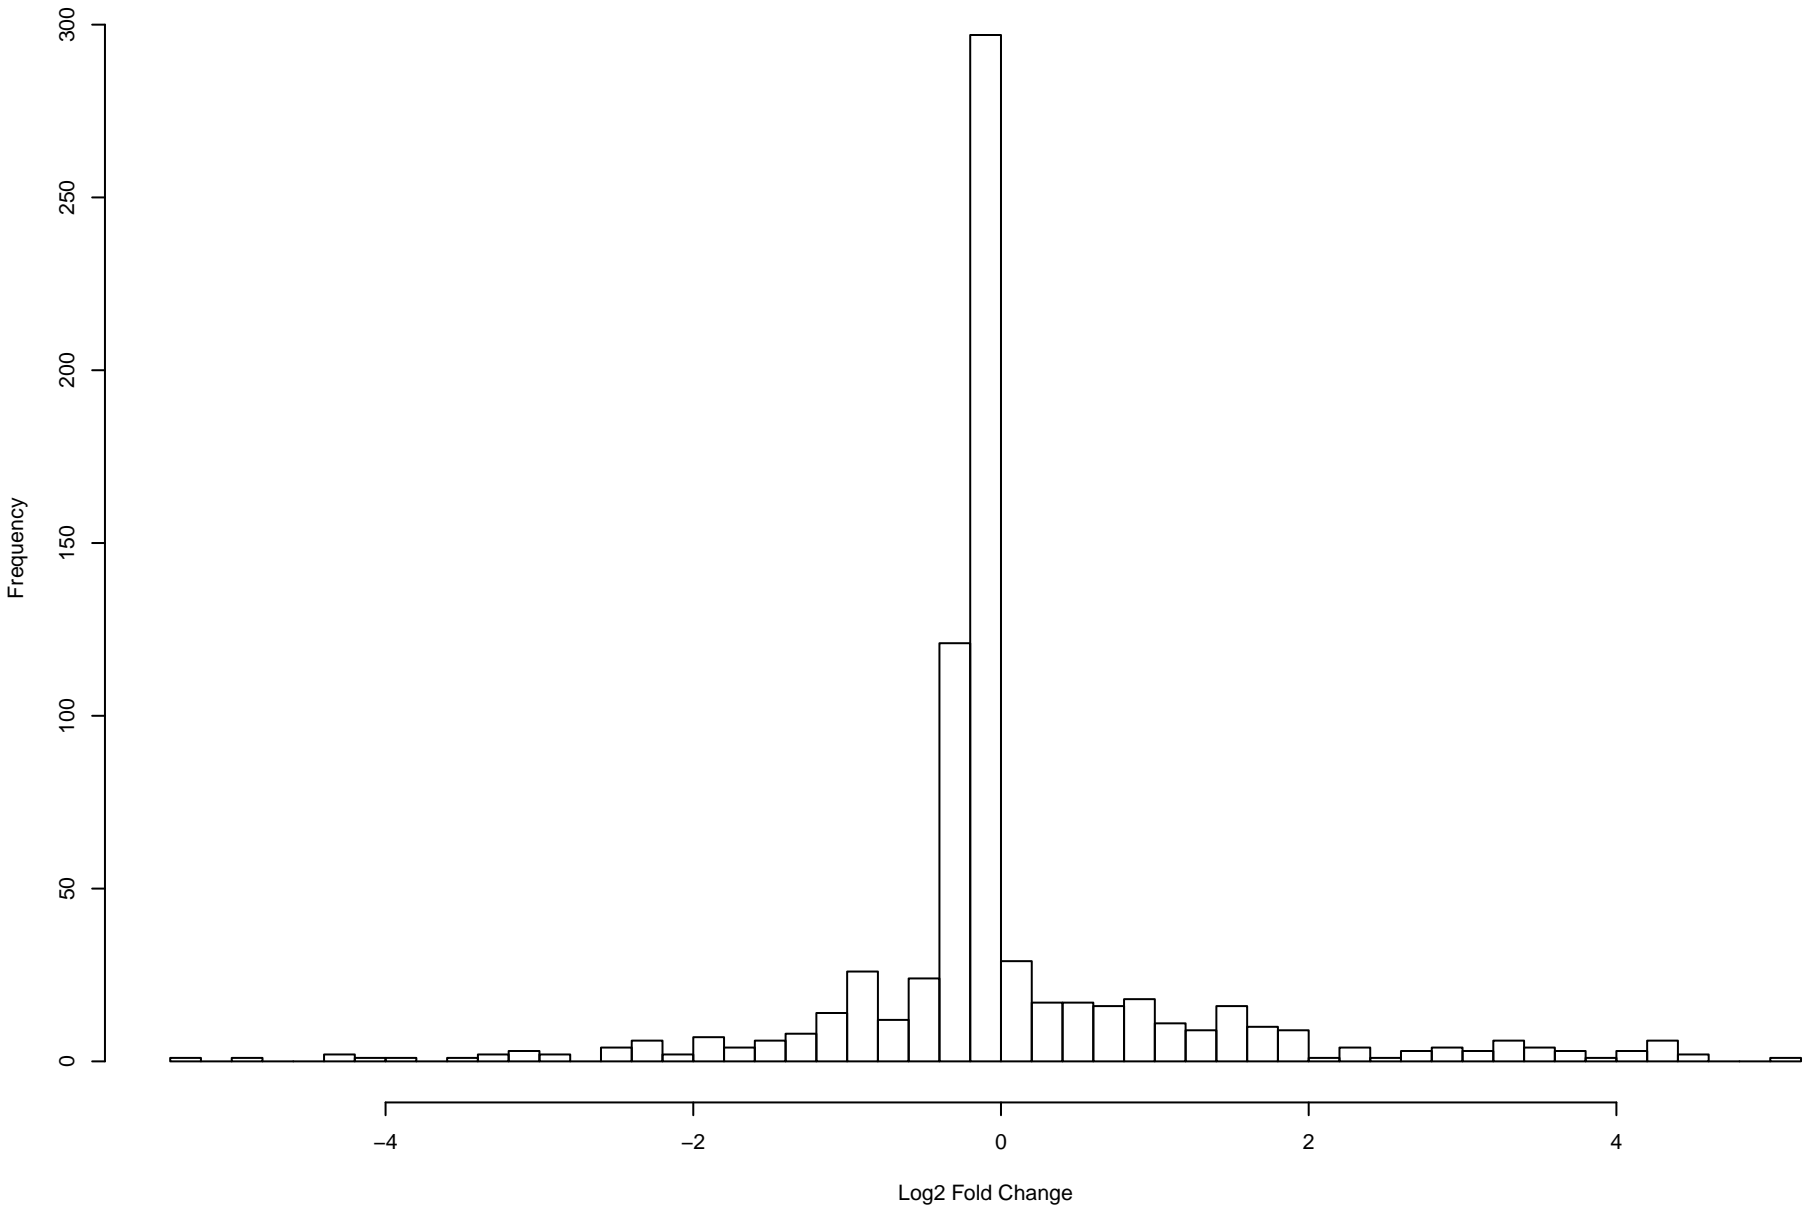

Log2 Fold Change Cat\_6/Cat\_1

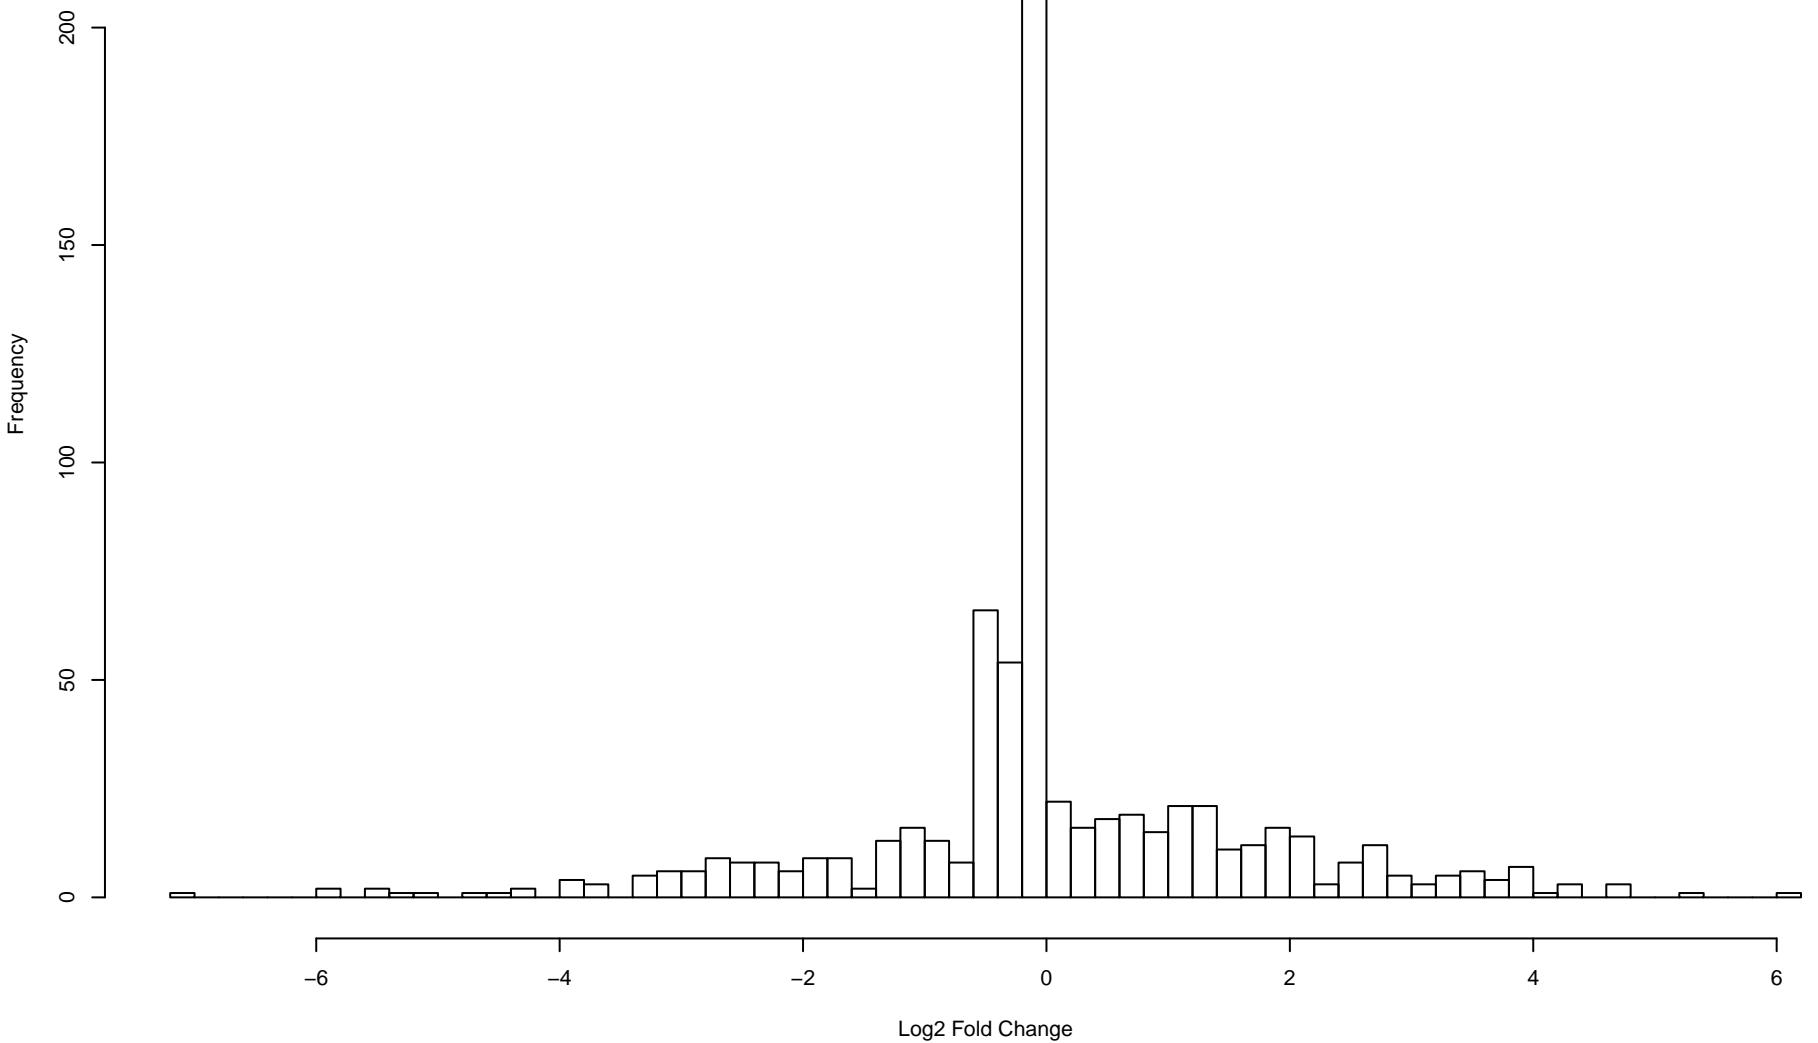

Log2 Fold Change Cat\_7/Cat\_1

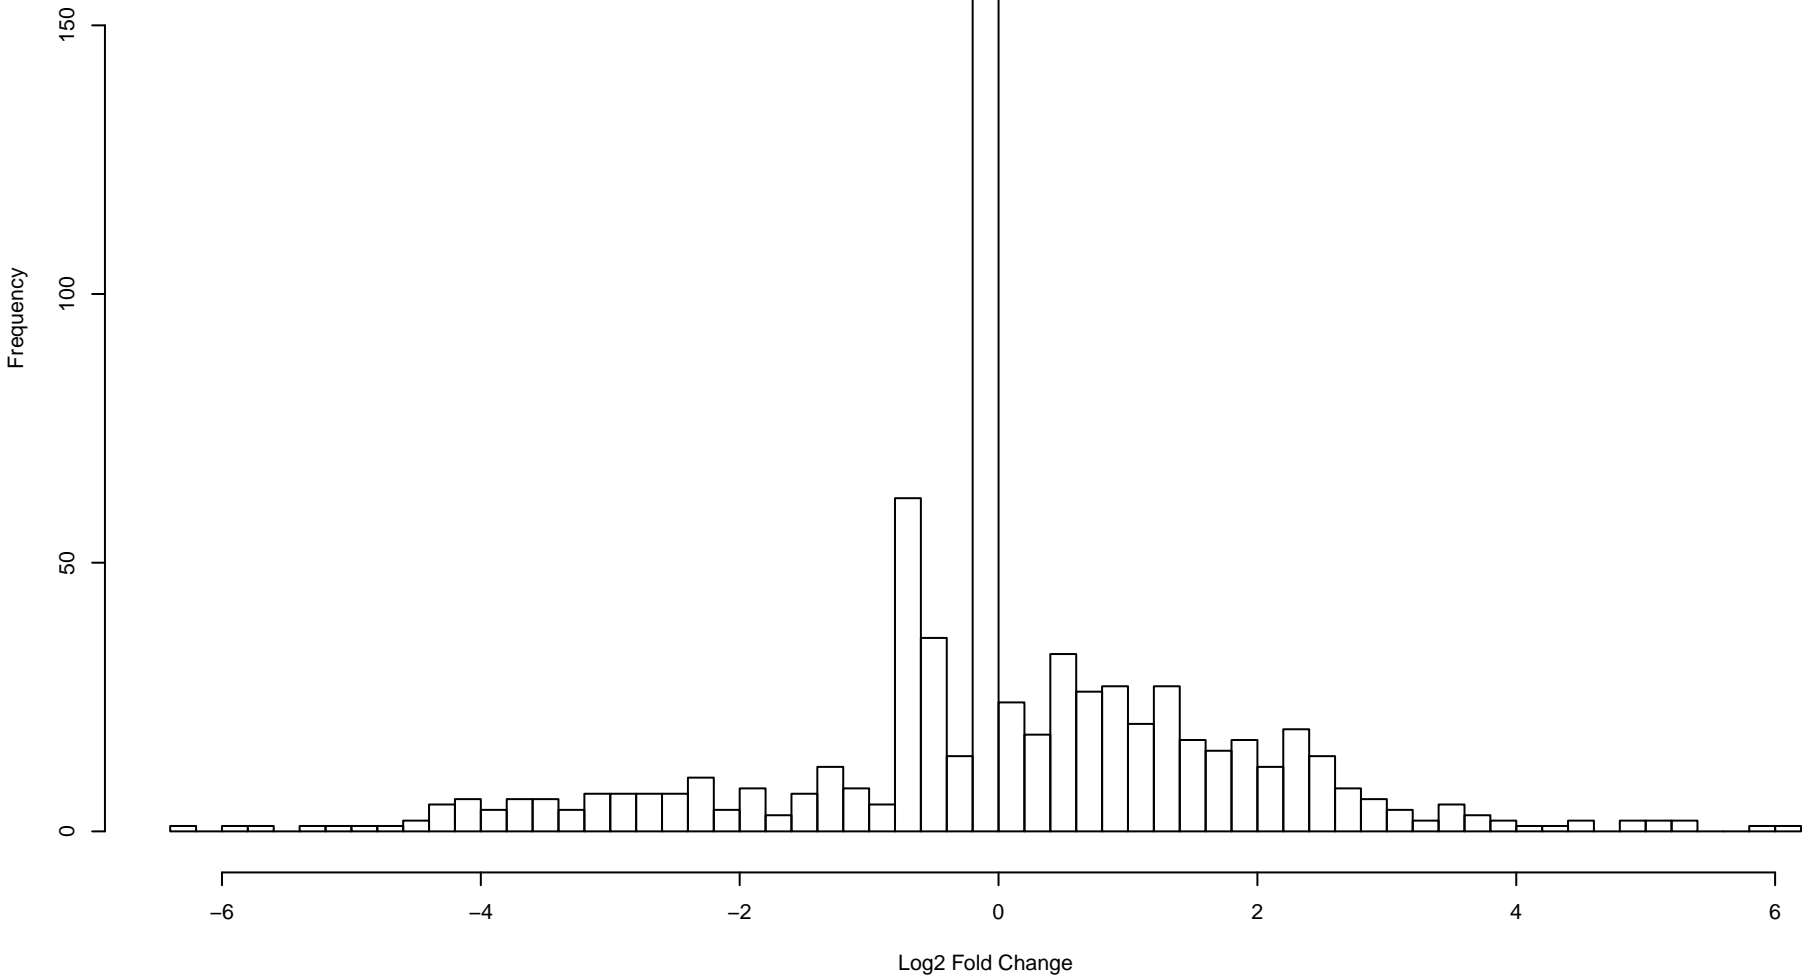

Log2 Fold Change Cat\_8/Cat\_1

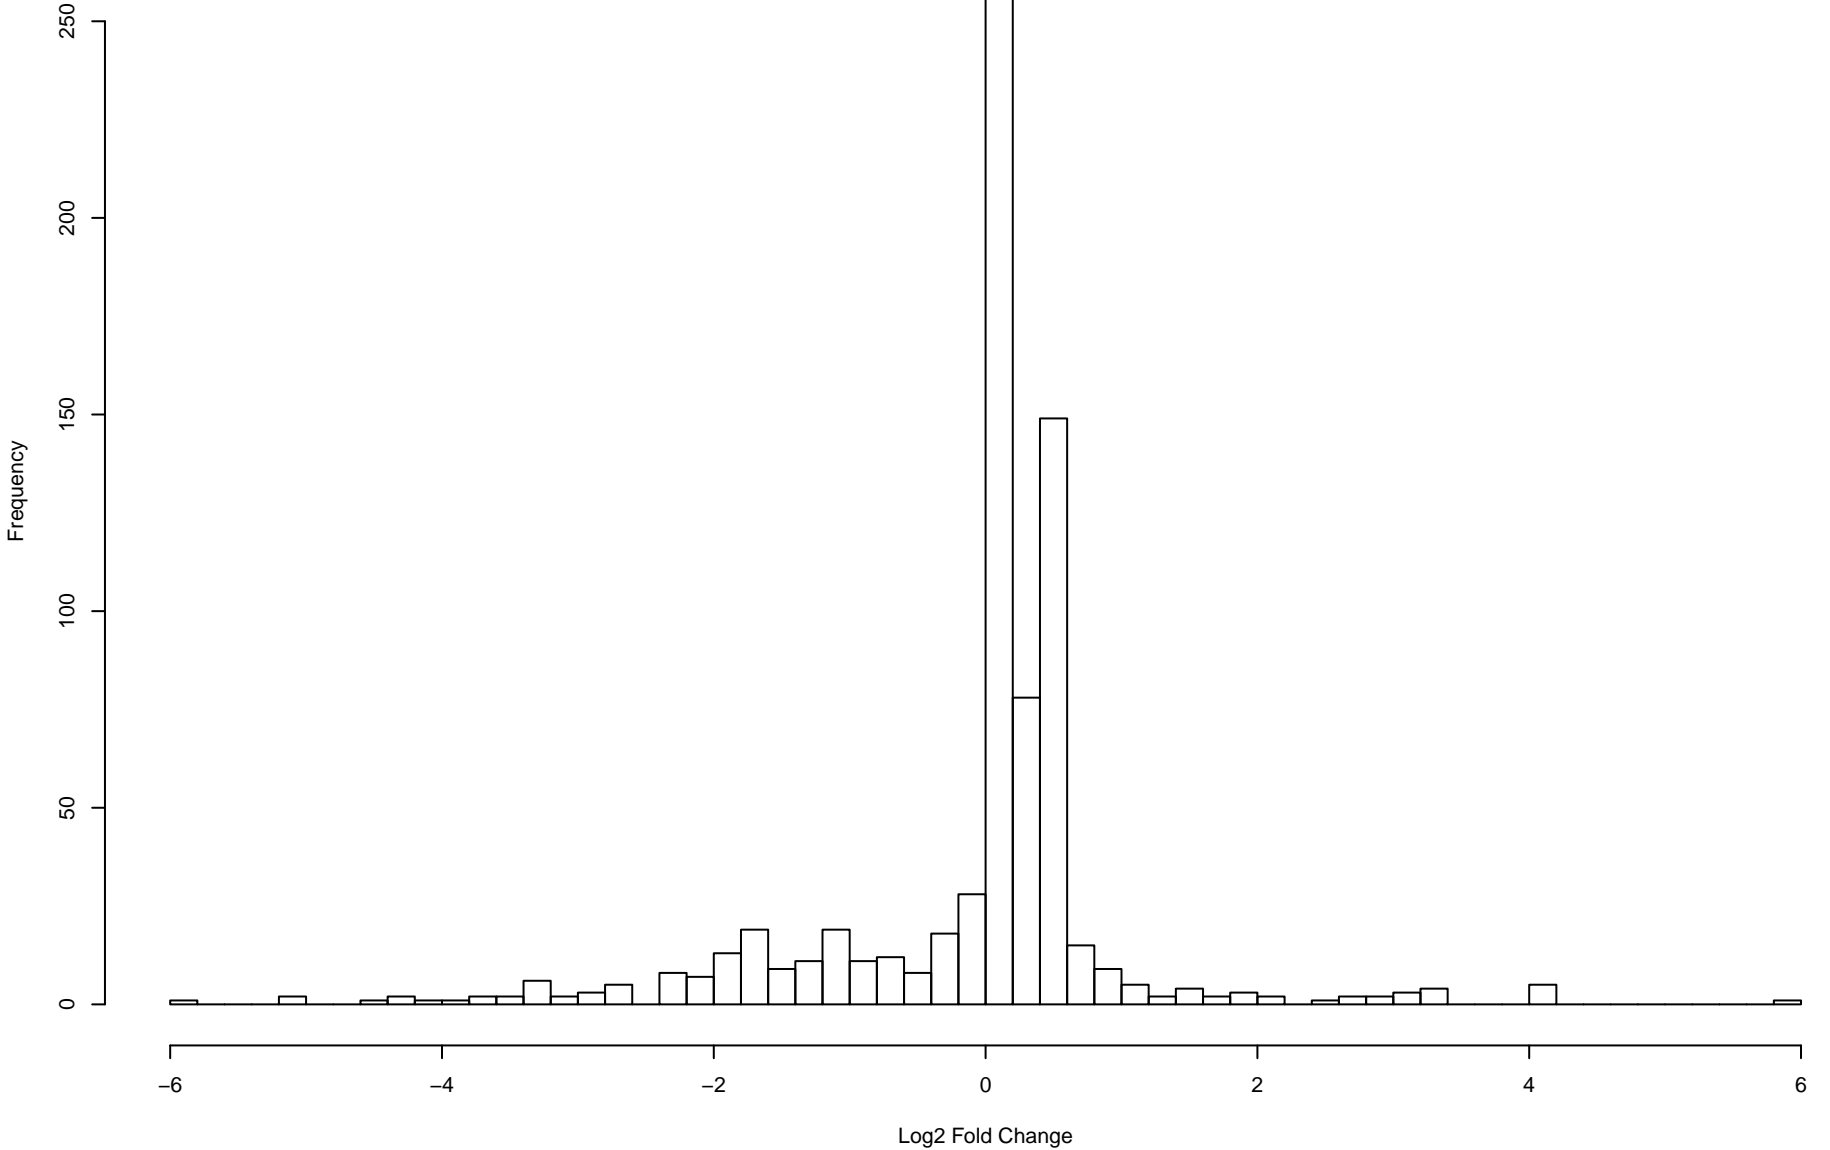



Log2 Fold Change Cat\_10/Cat\_1

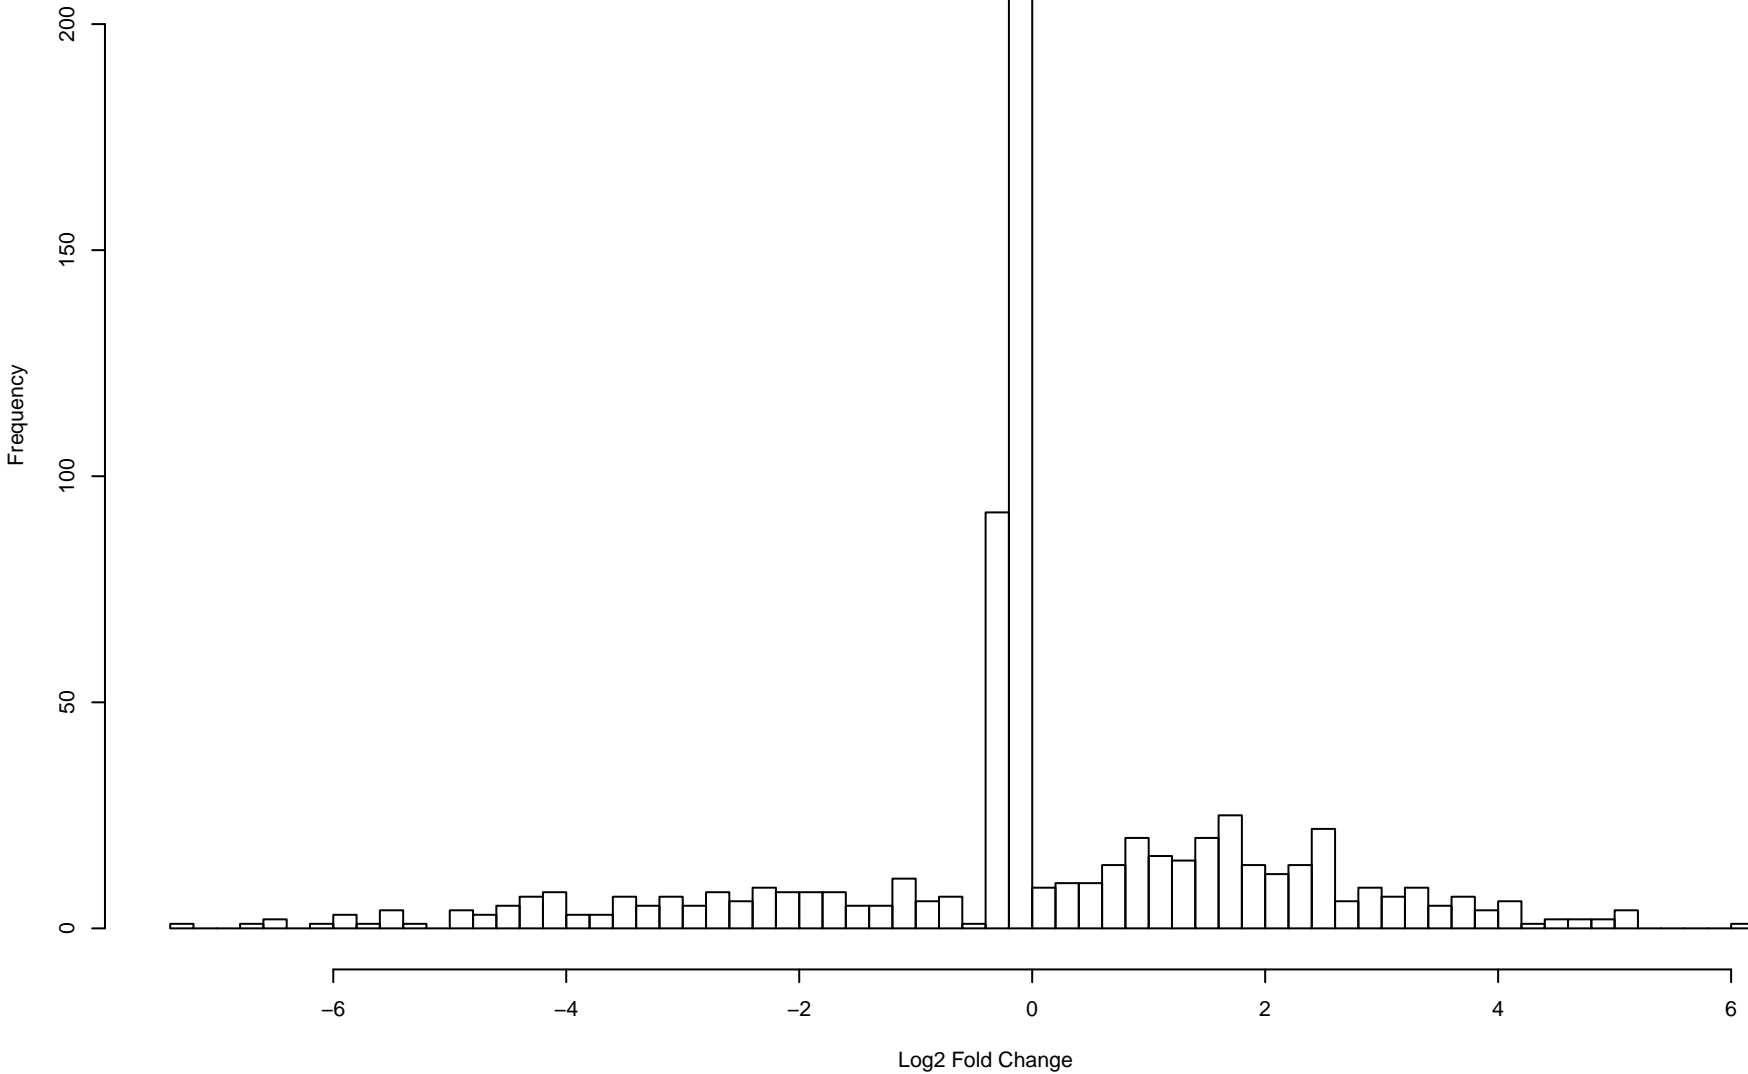

Log2 Fold Change Cat\_9/Cat\_1

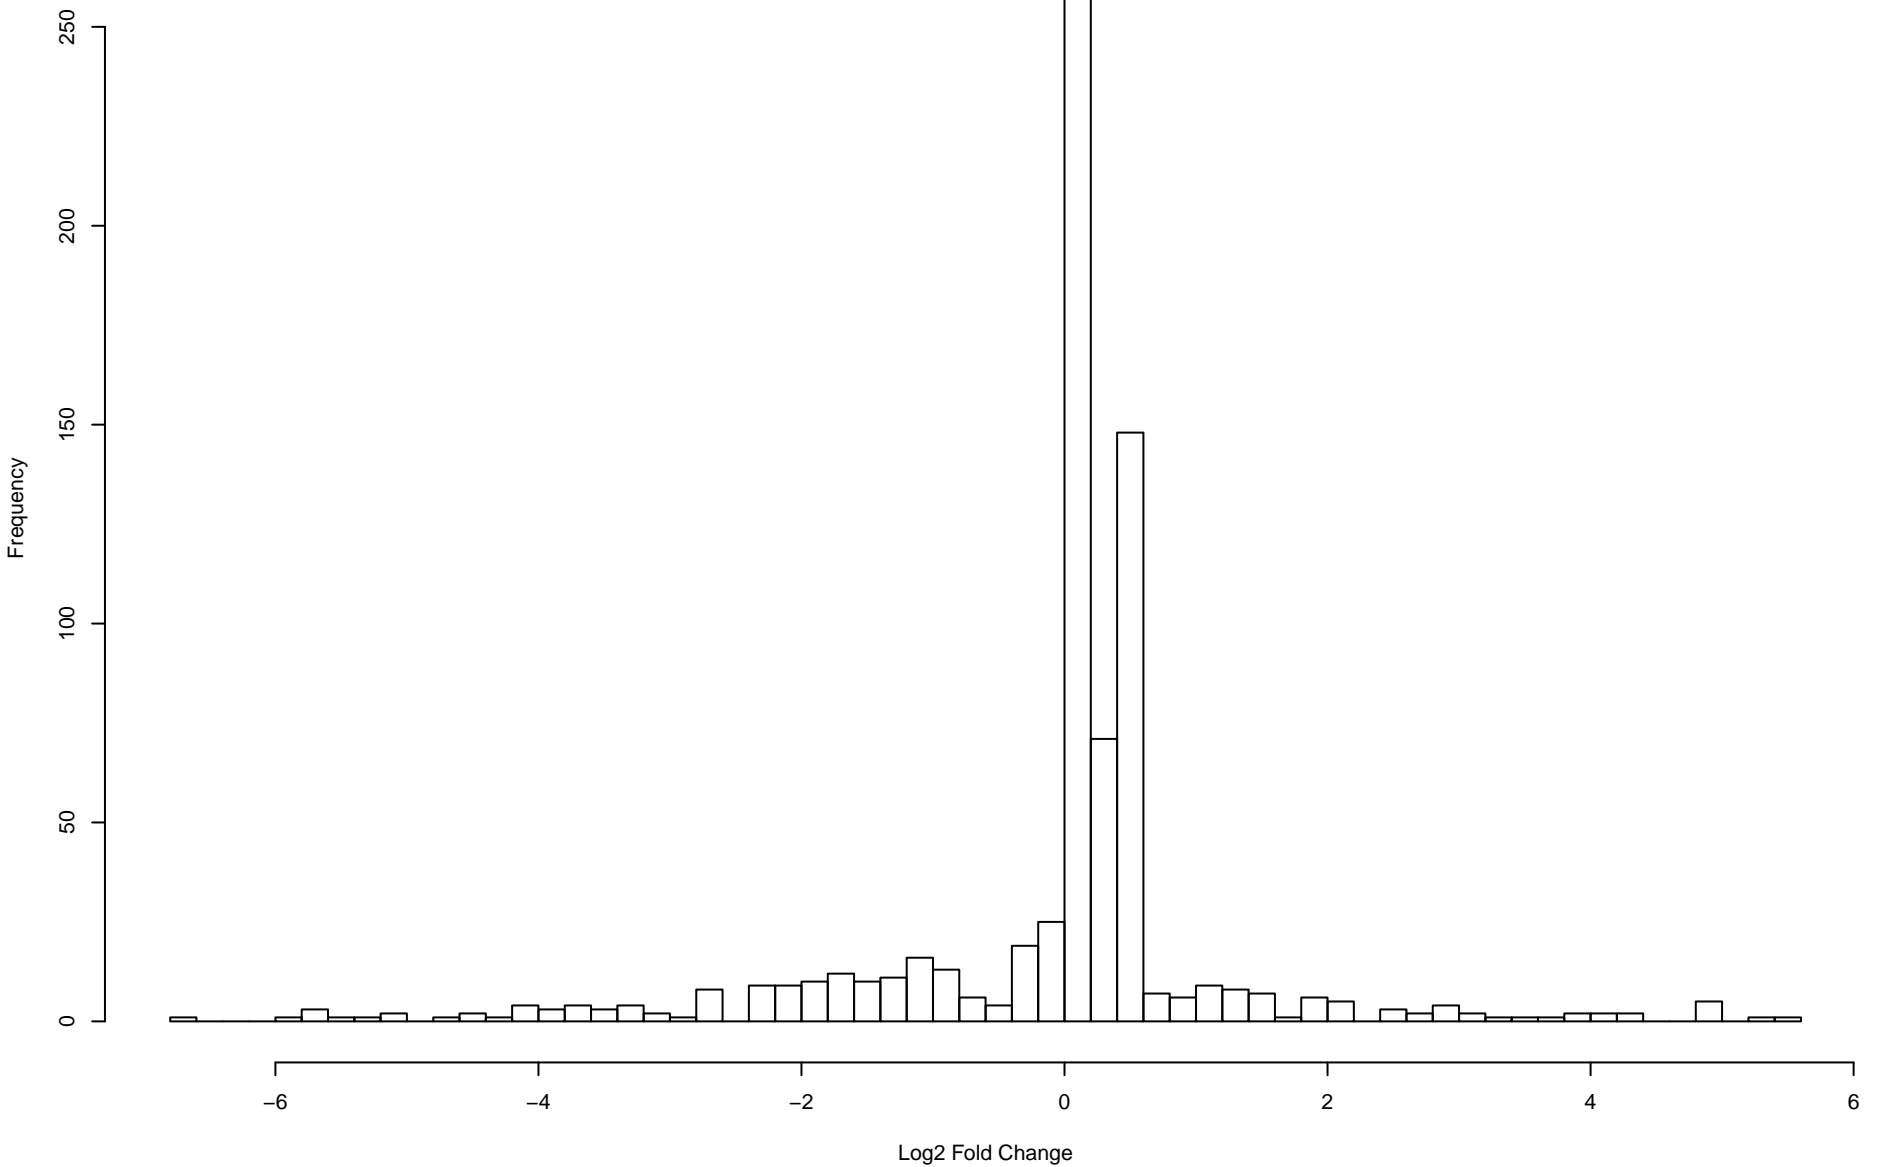

Log2 Fold Change Cat\_4/Cat\_3

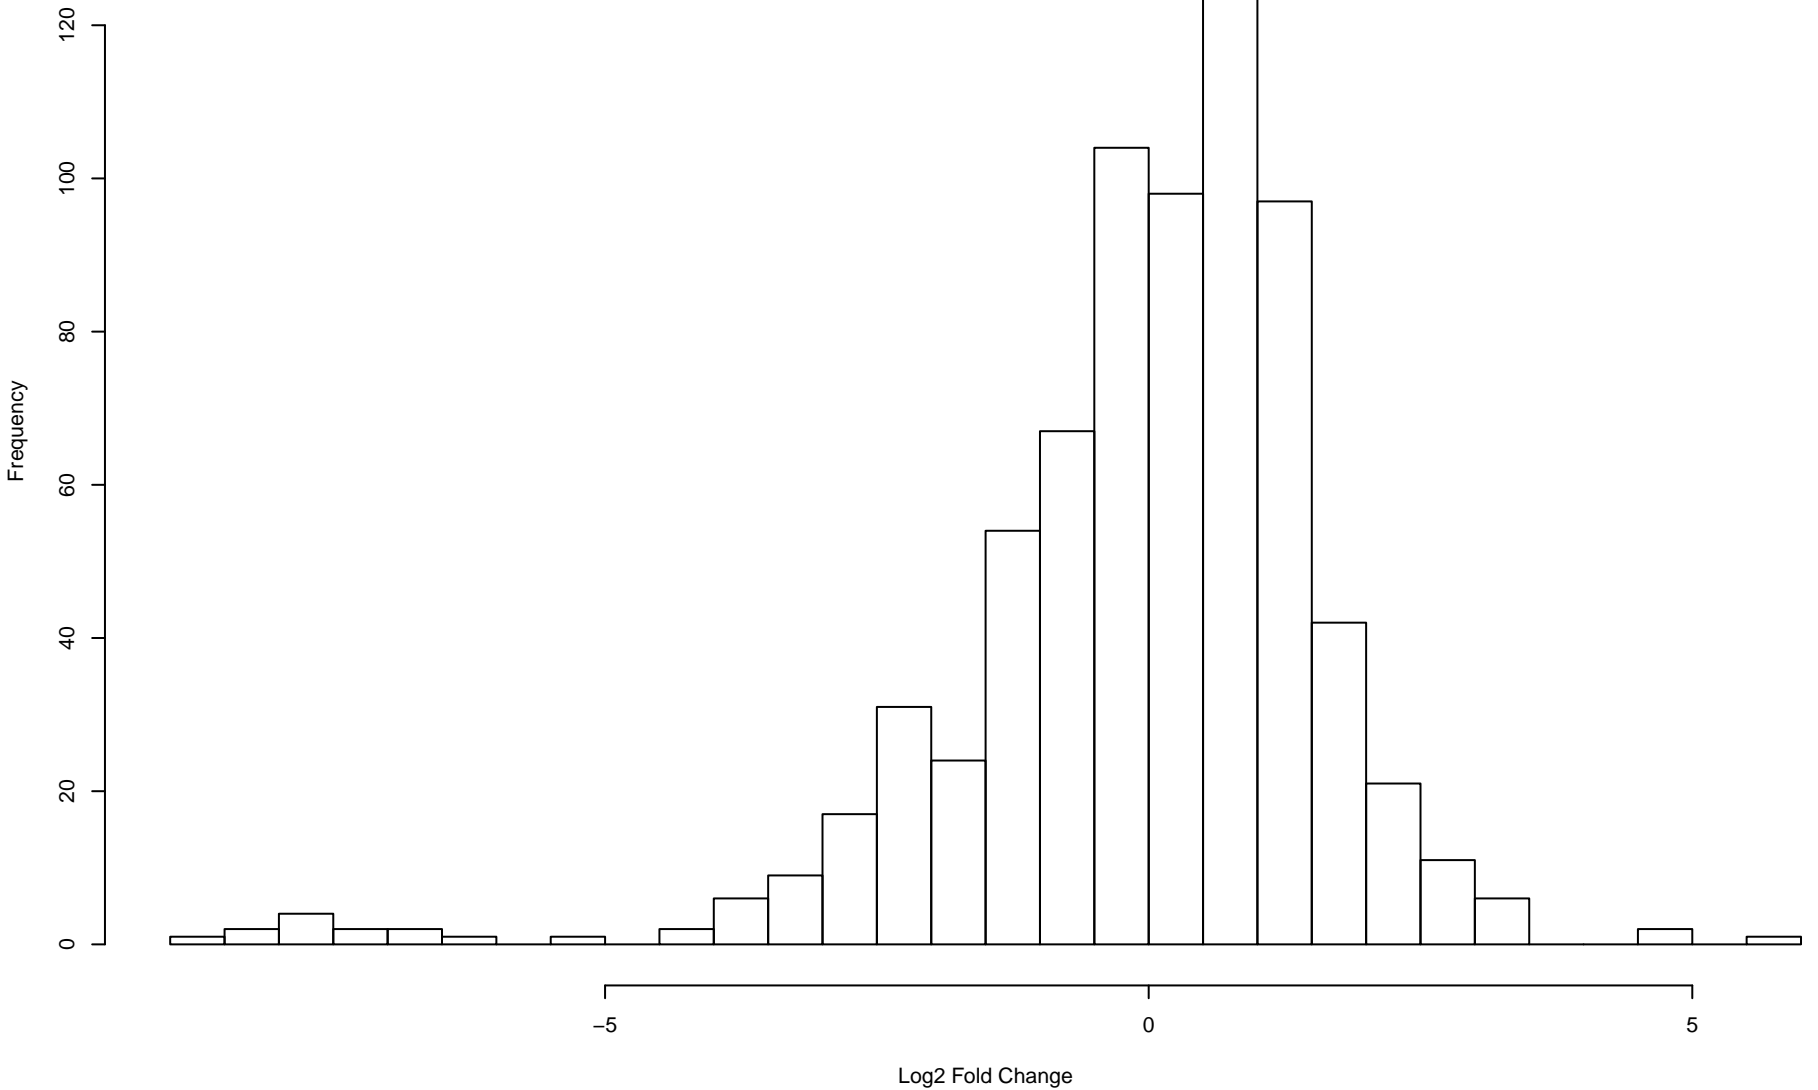

Log2 Fold Change Cat\_5/Cat\_3

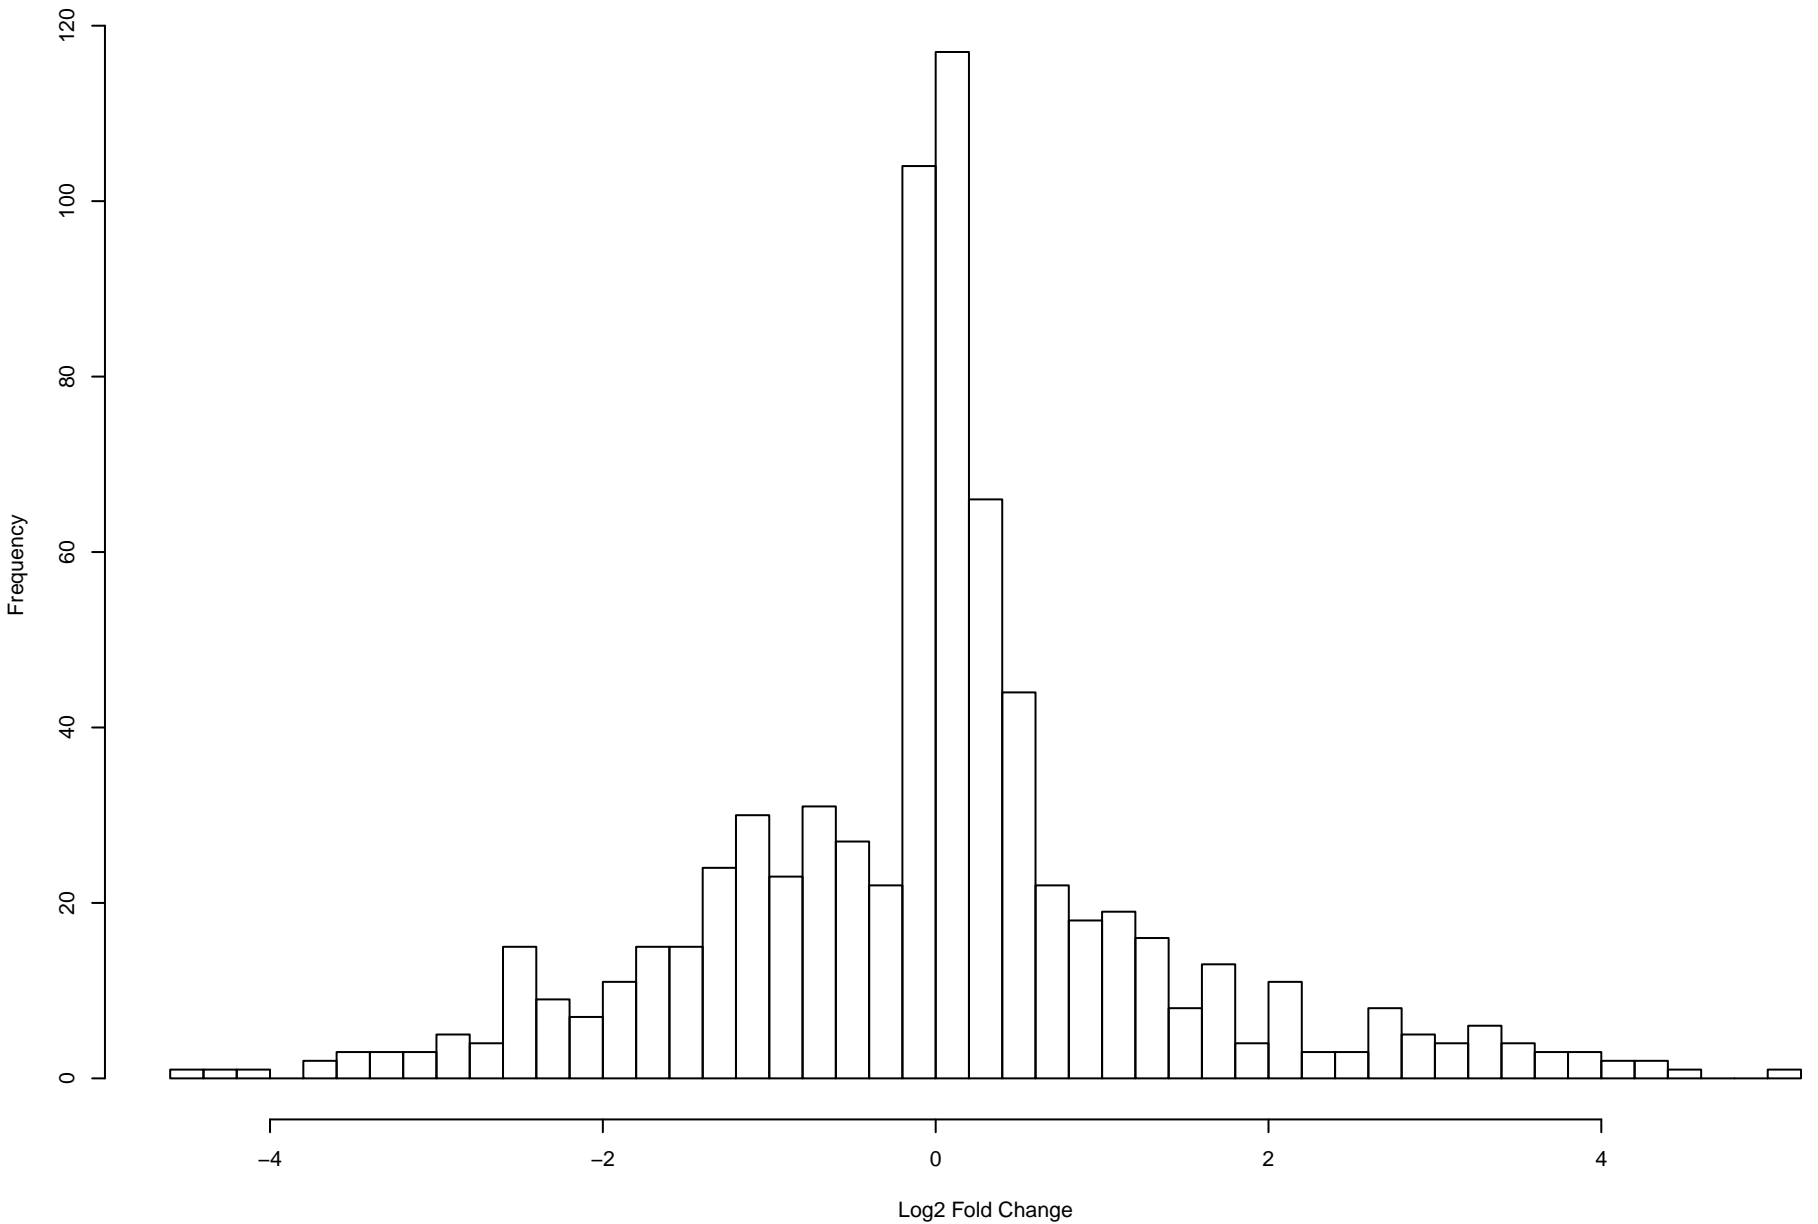

Log2 Fold Change Cat\_6/Cat\_3

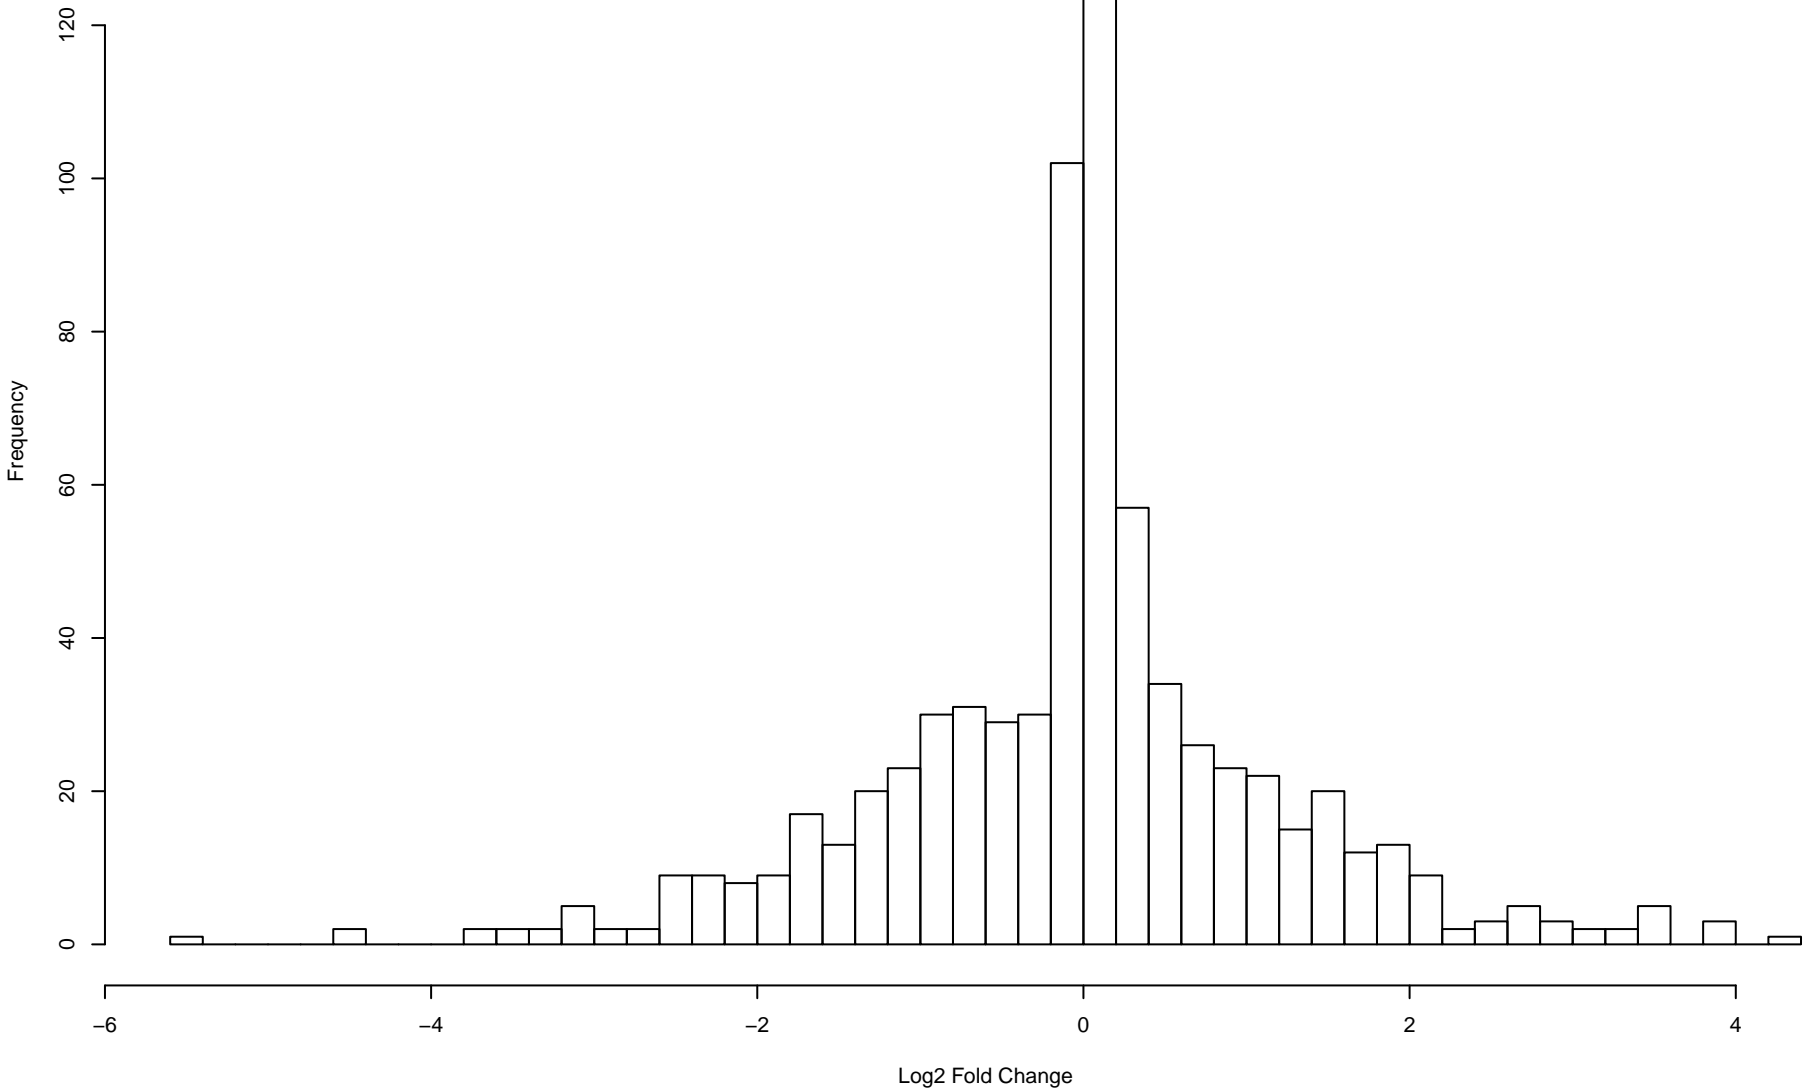

Log2 Fold Change Cat\_7/Cat\_3

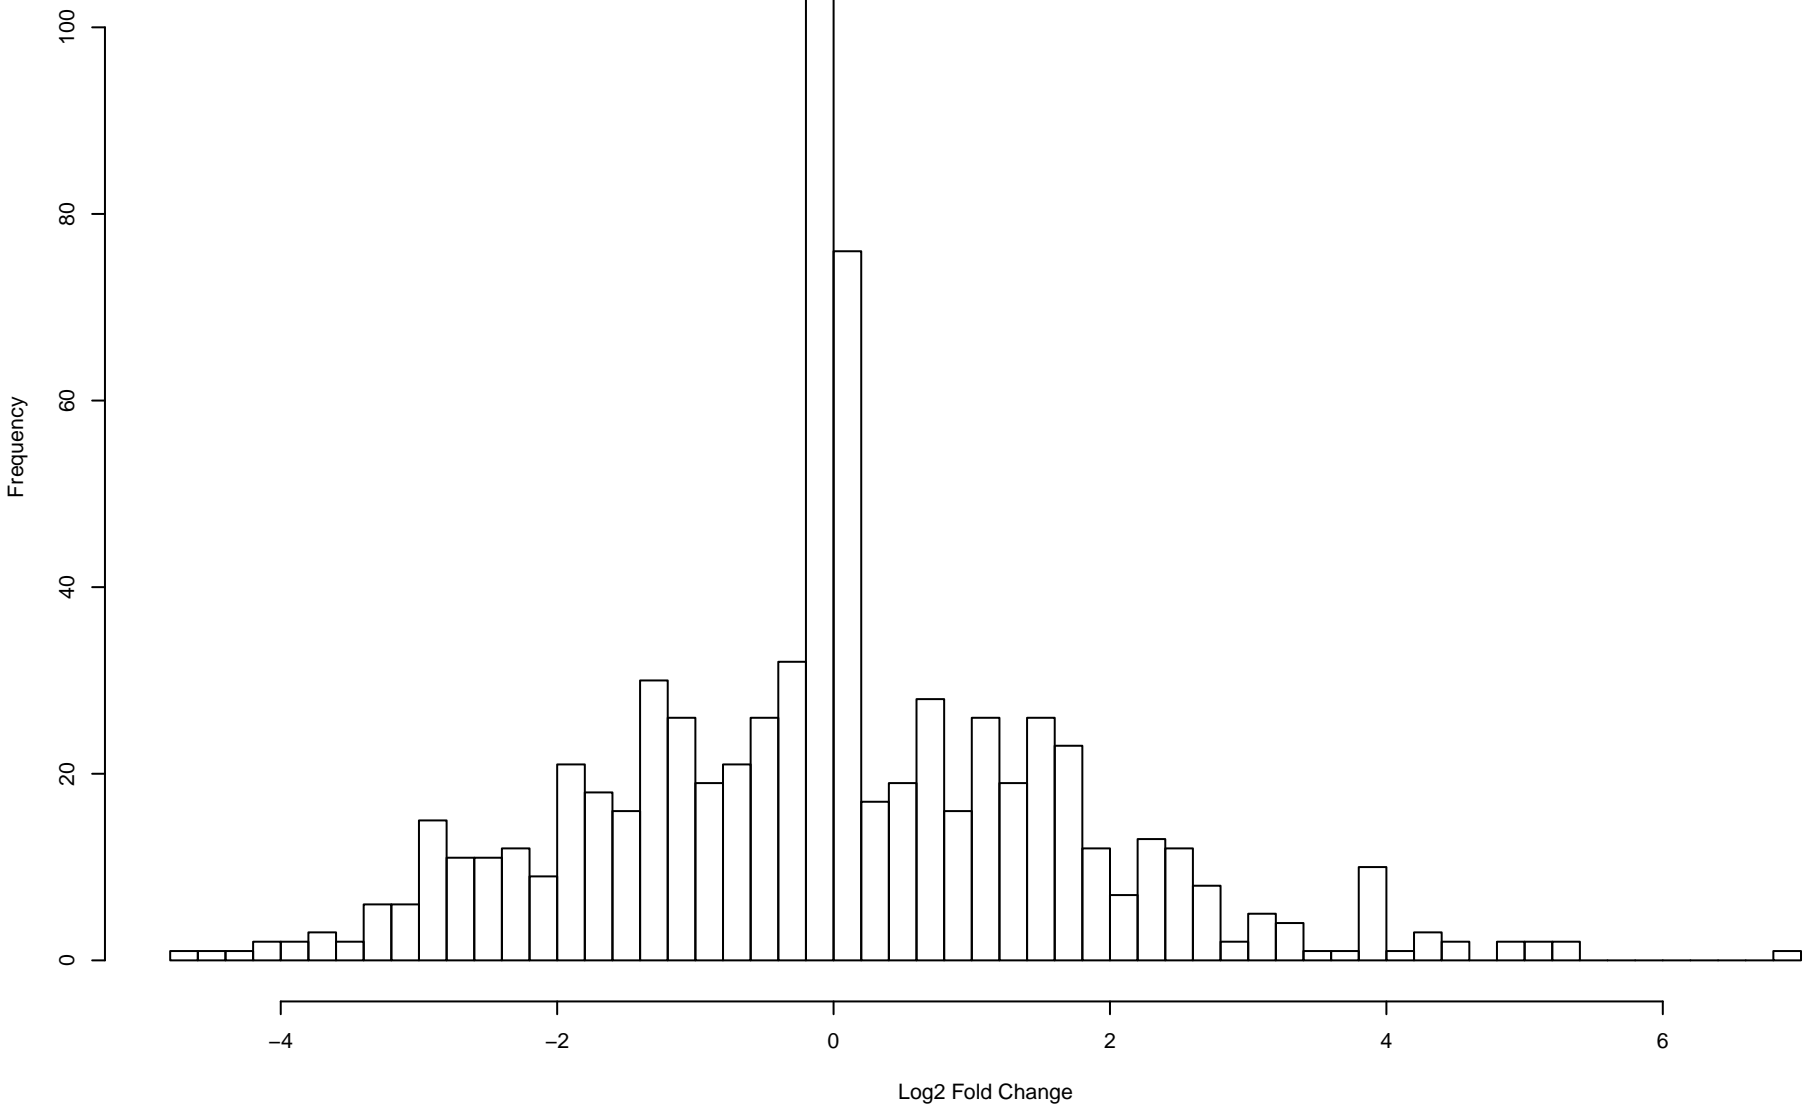

Log2 Fold Change Cat\_8/Cat\_3

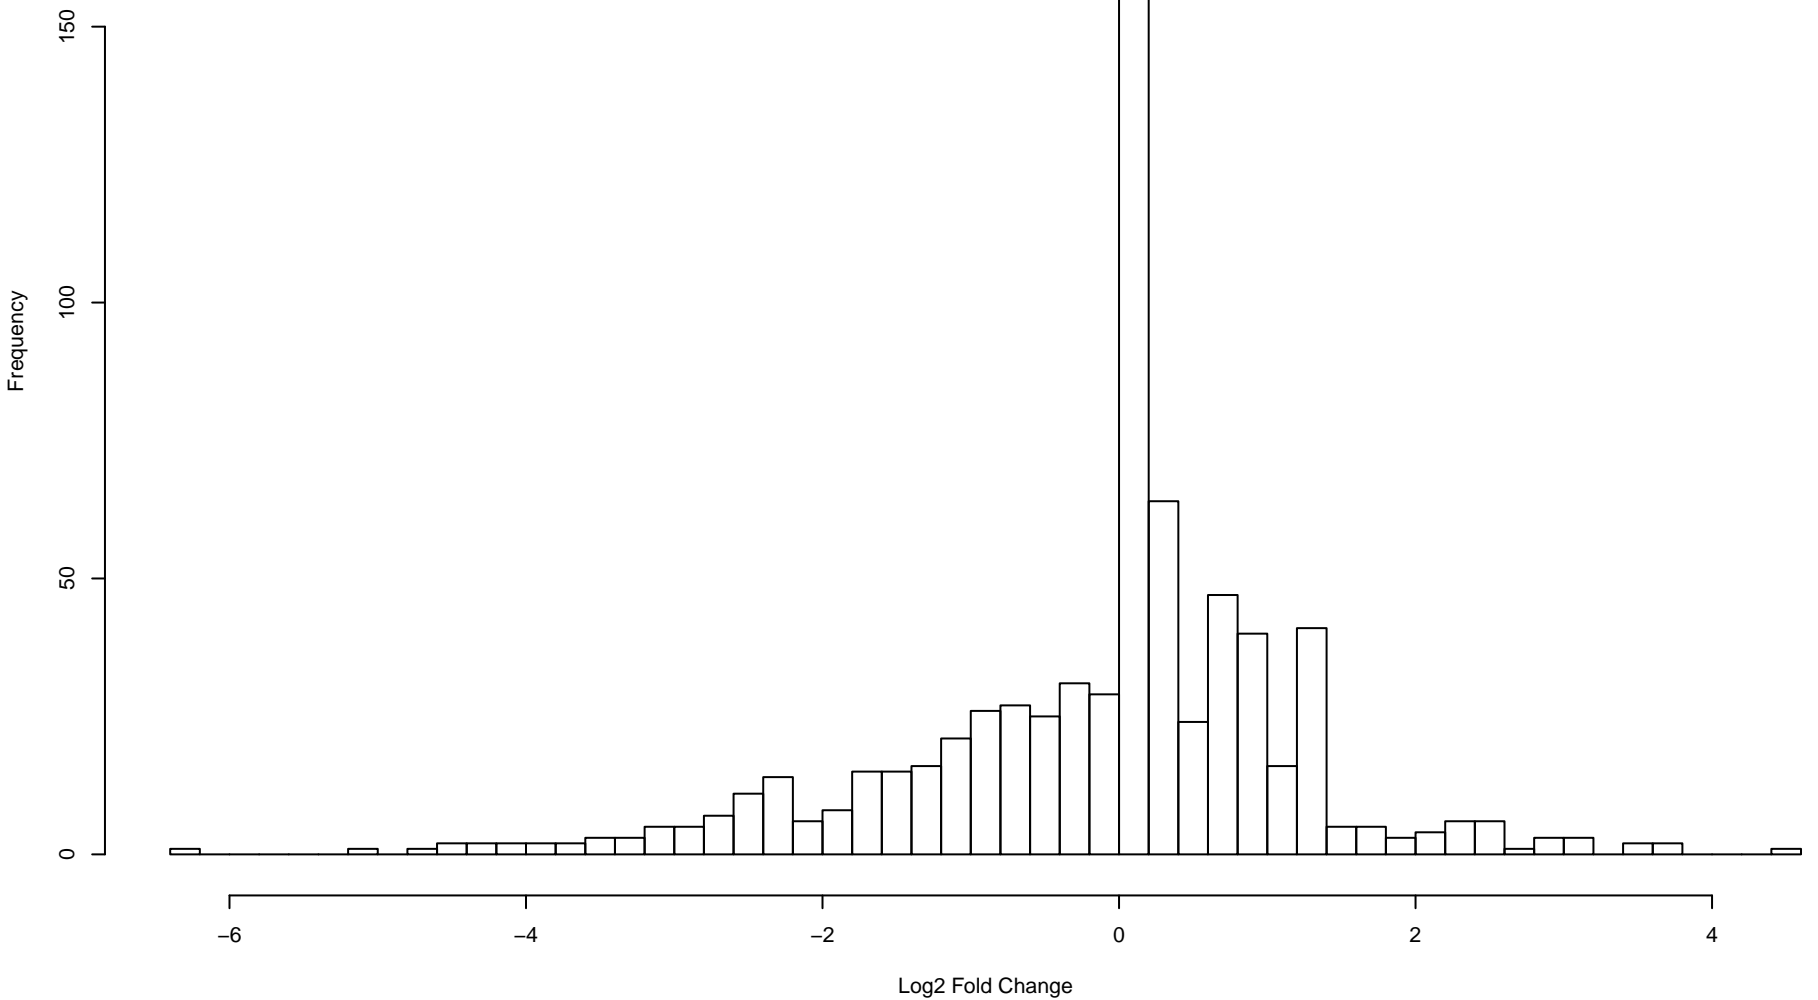

Log2 Fold Change Cat\_10/Cat\_3

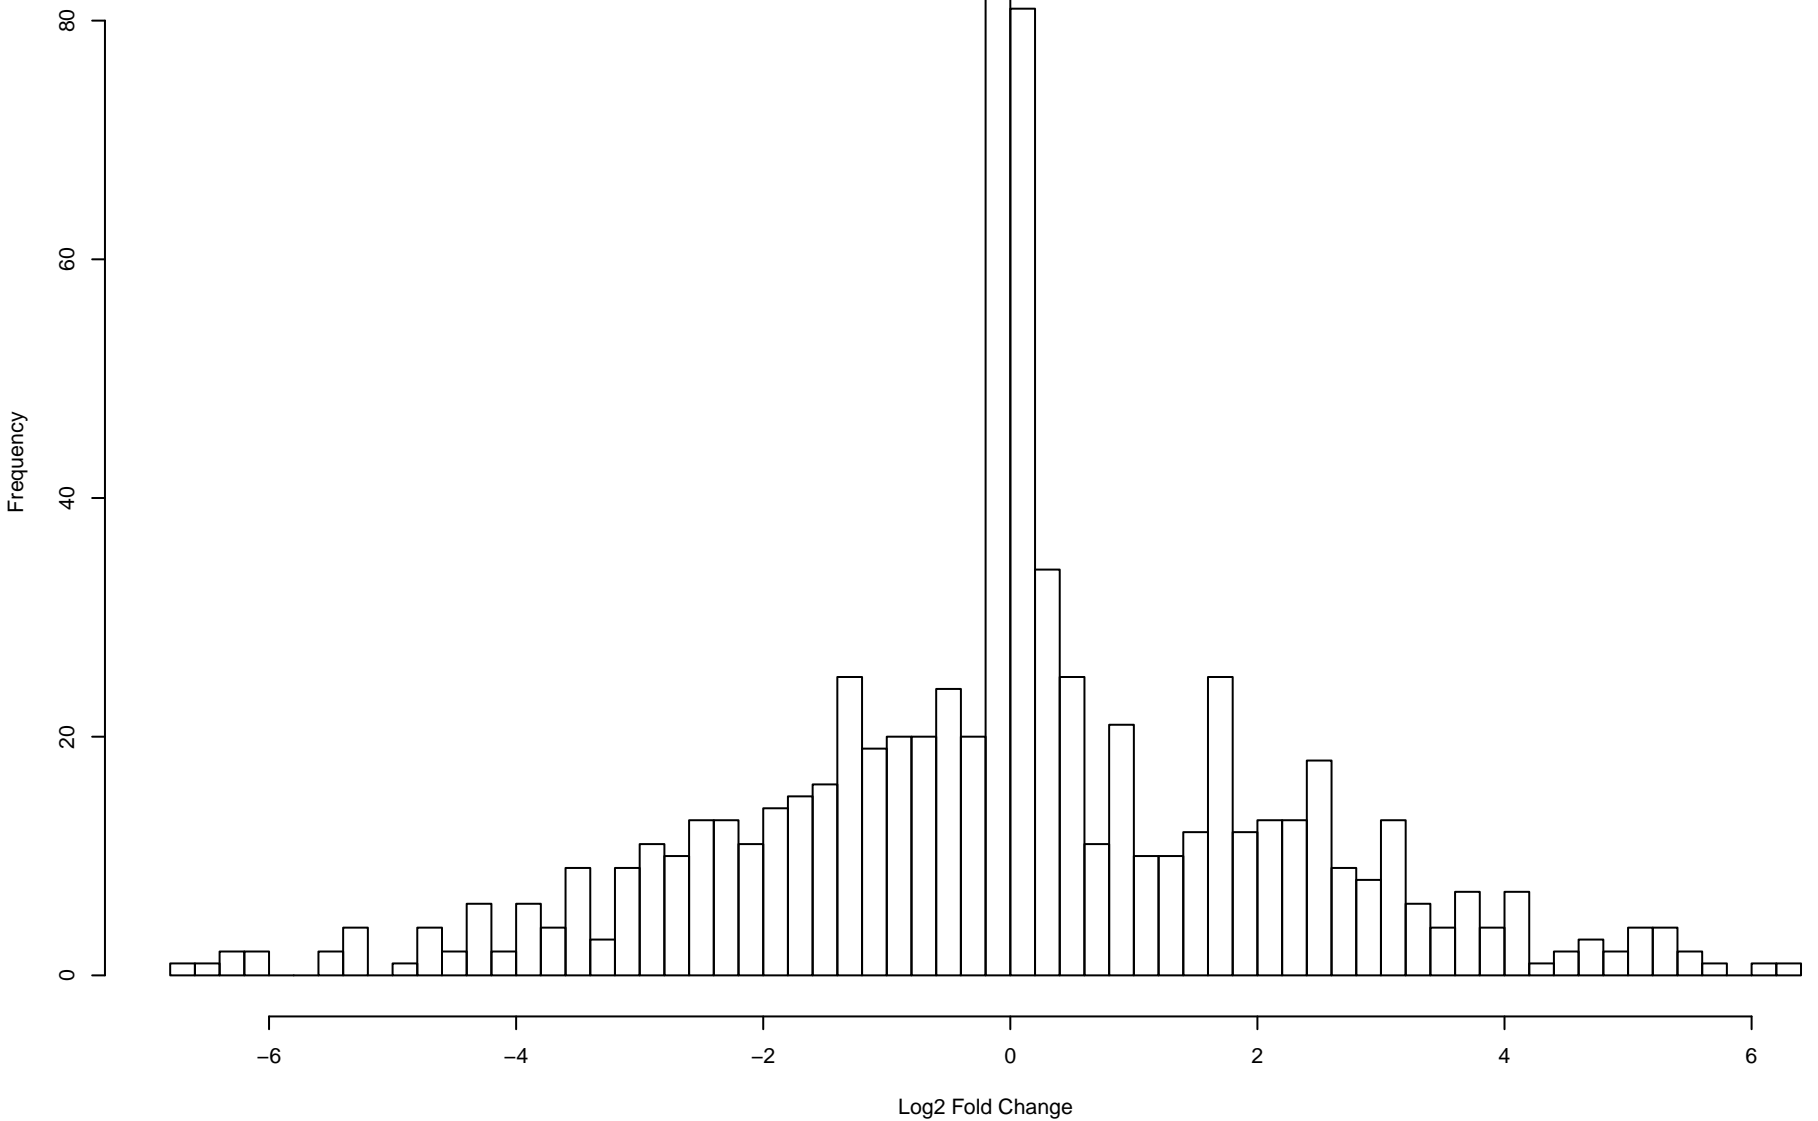



Log2 Fold Change Cat\_9/Cat\_3

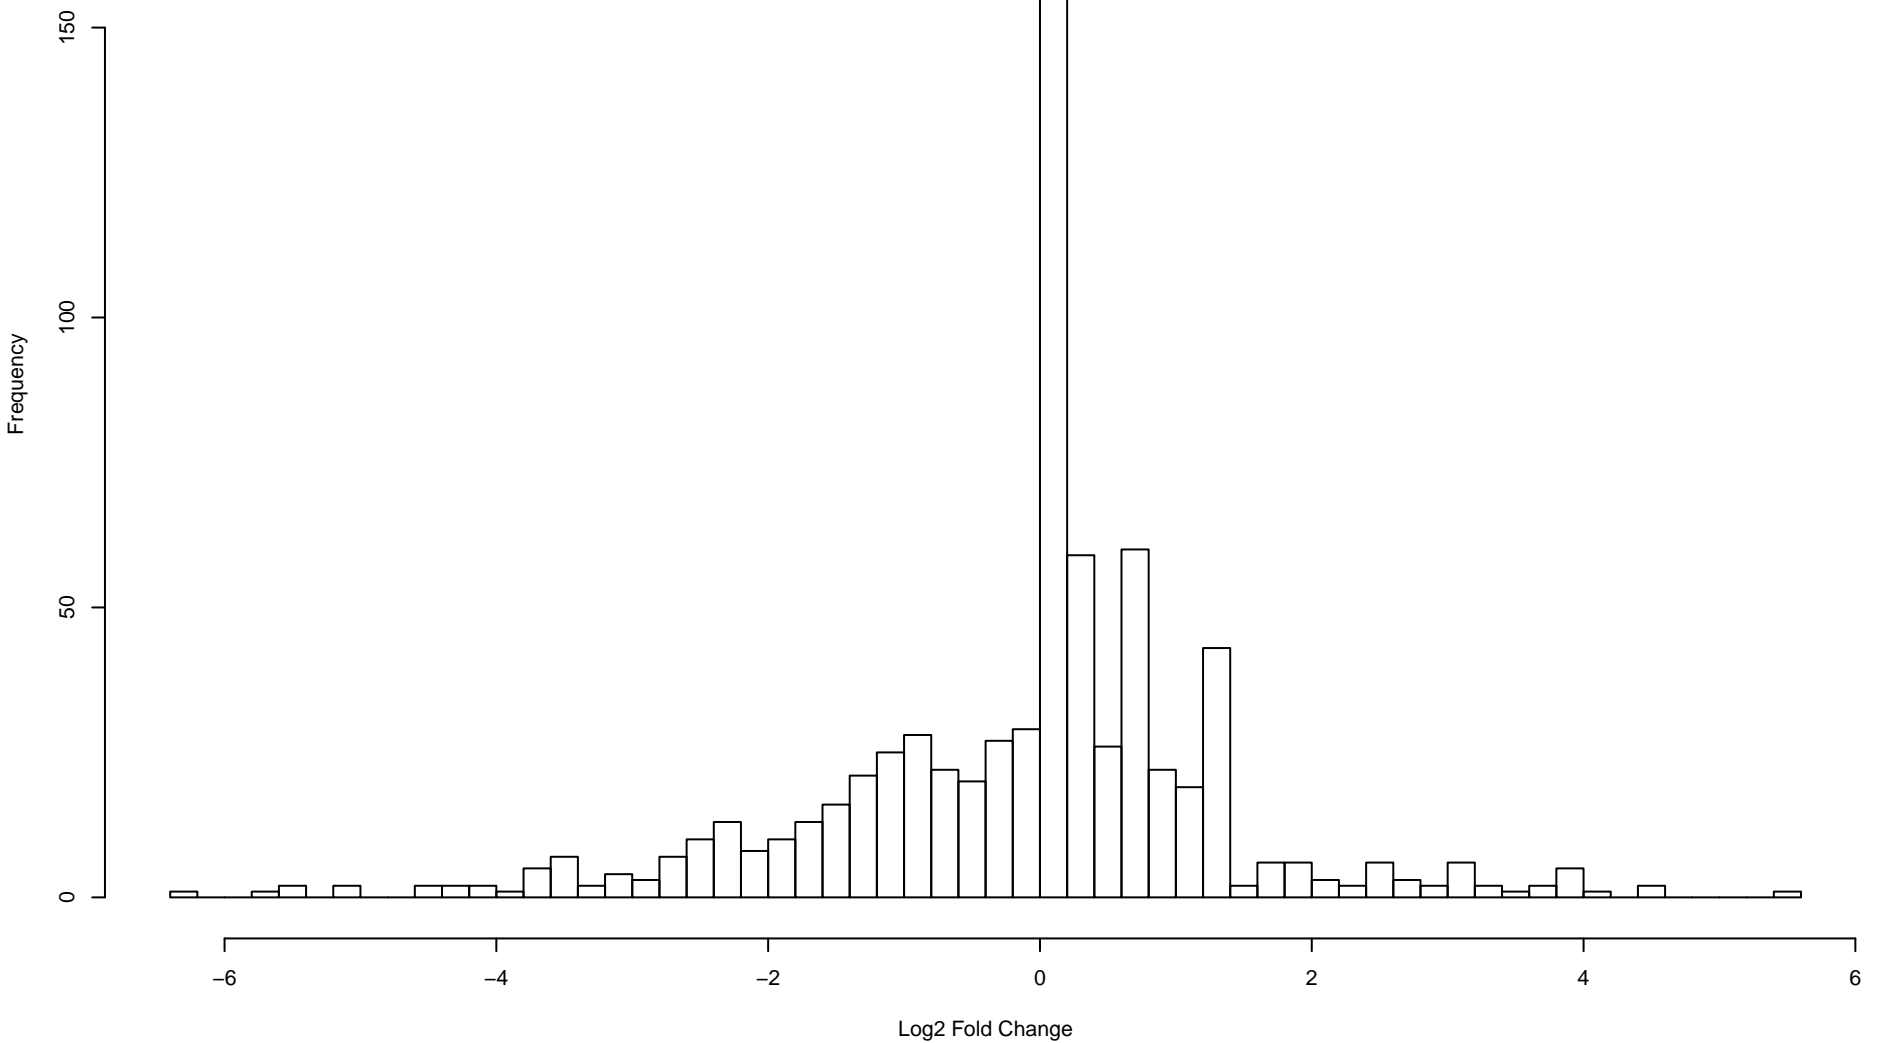

Log2 Fold Change Cat\_5/Cat\_4

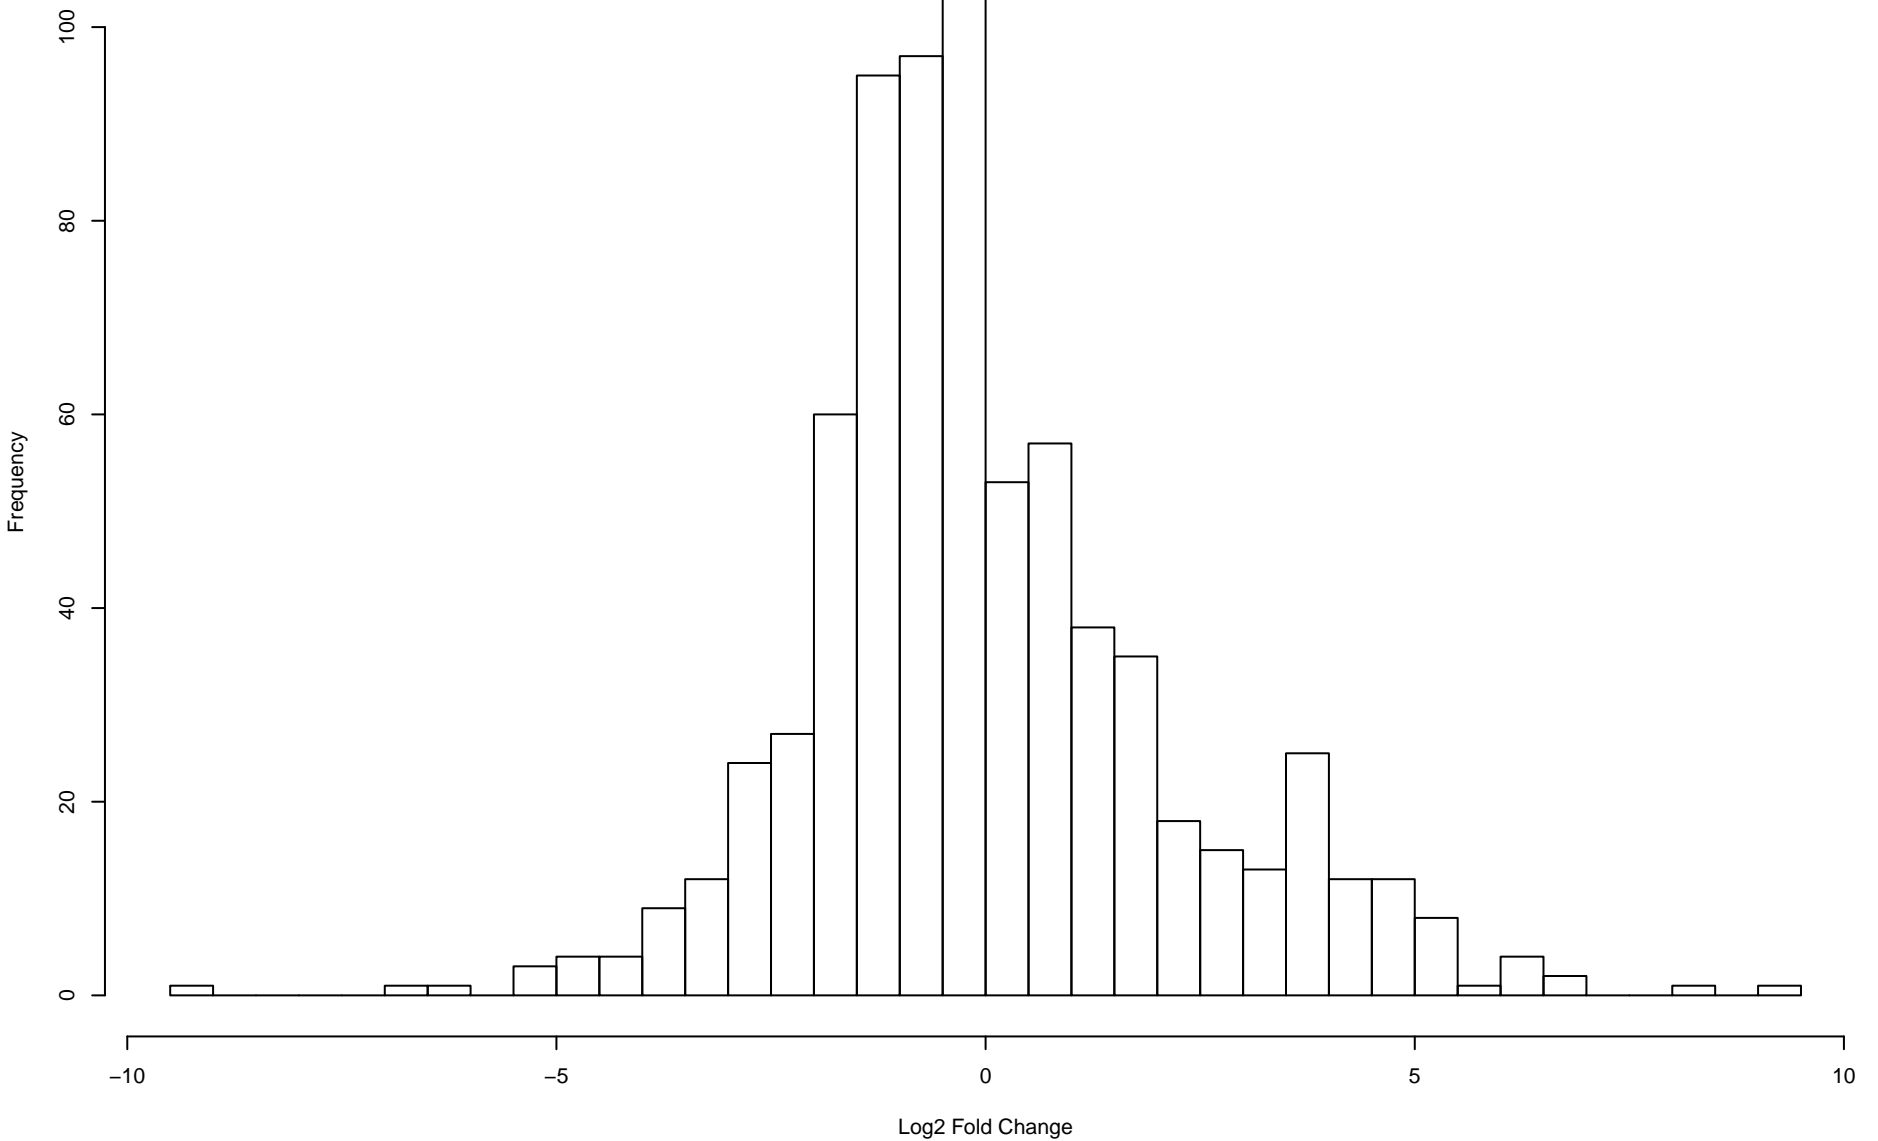

Log2 Fold Change Cat\_6/Cat\_4

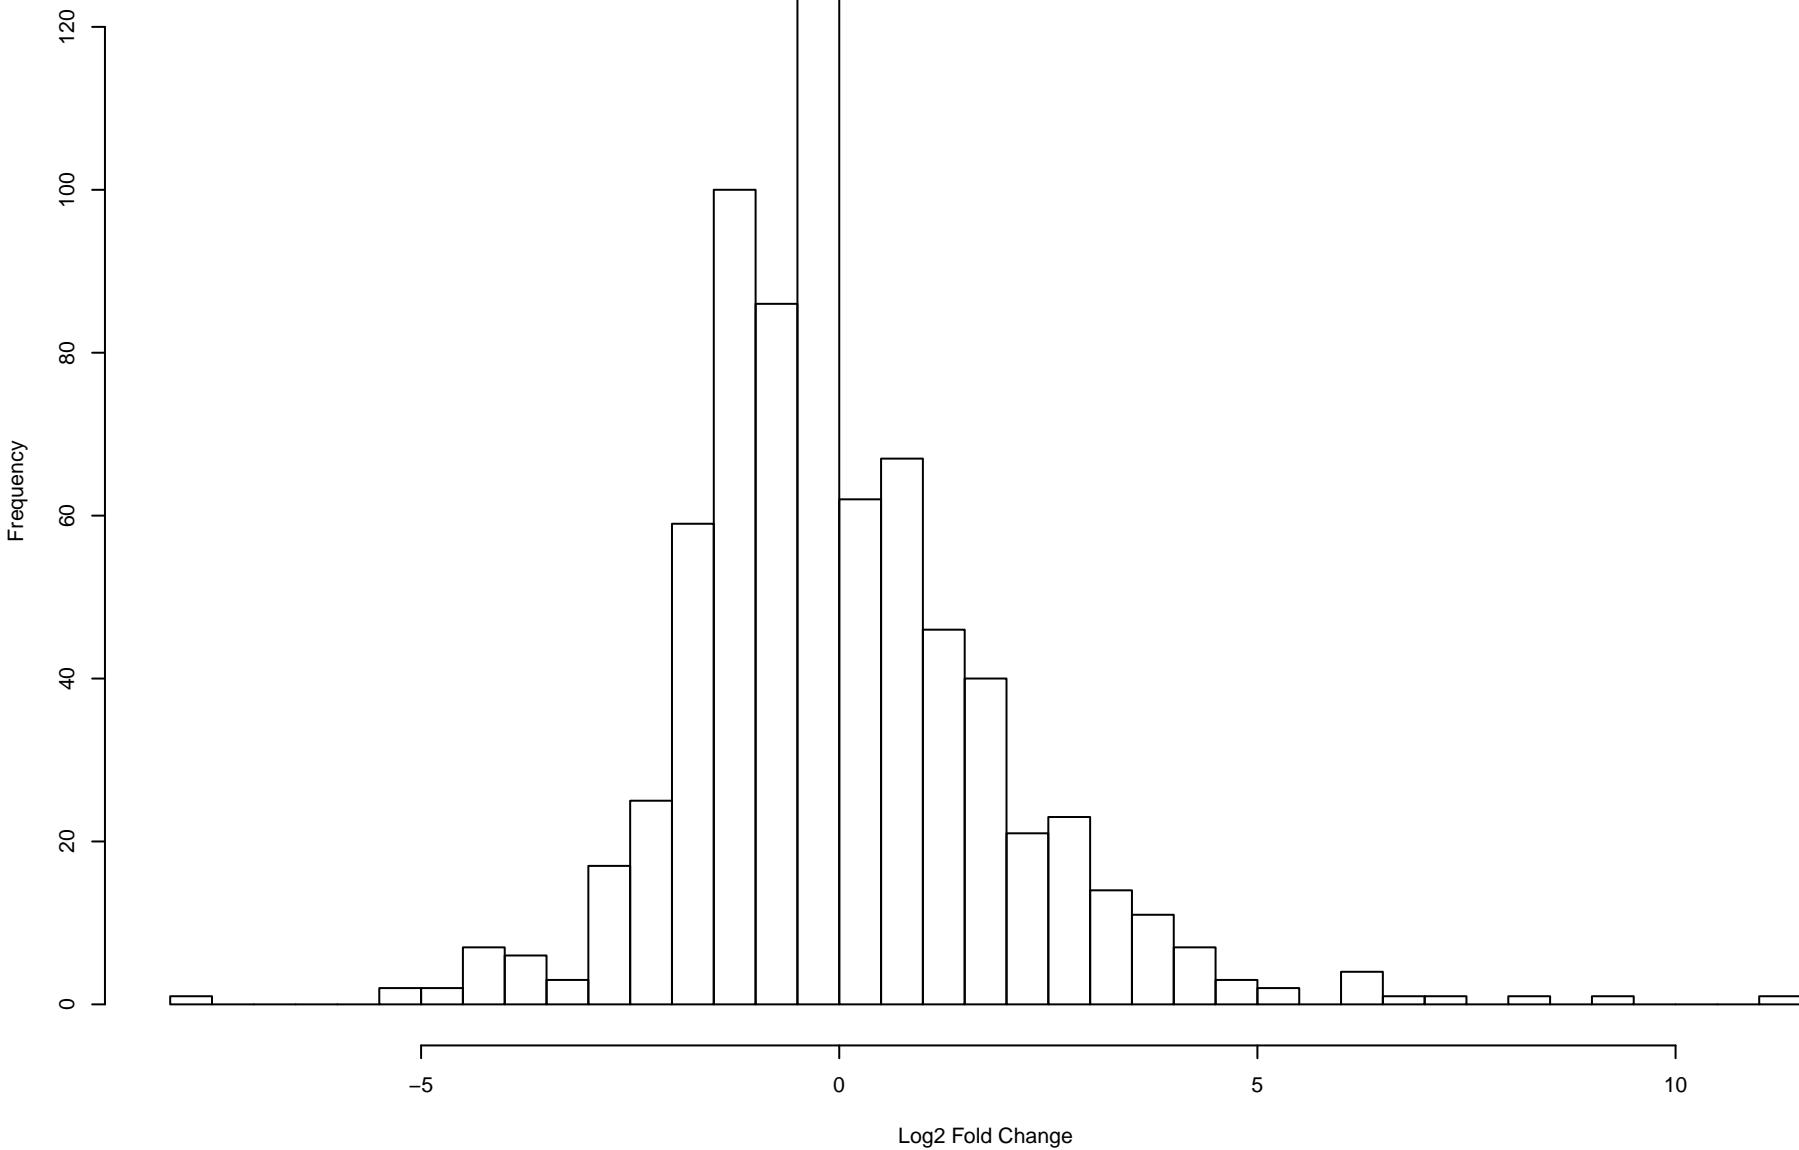

Log2 Fold Change Cat\_7/Cat\_4

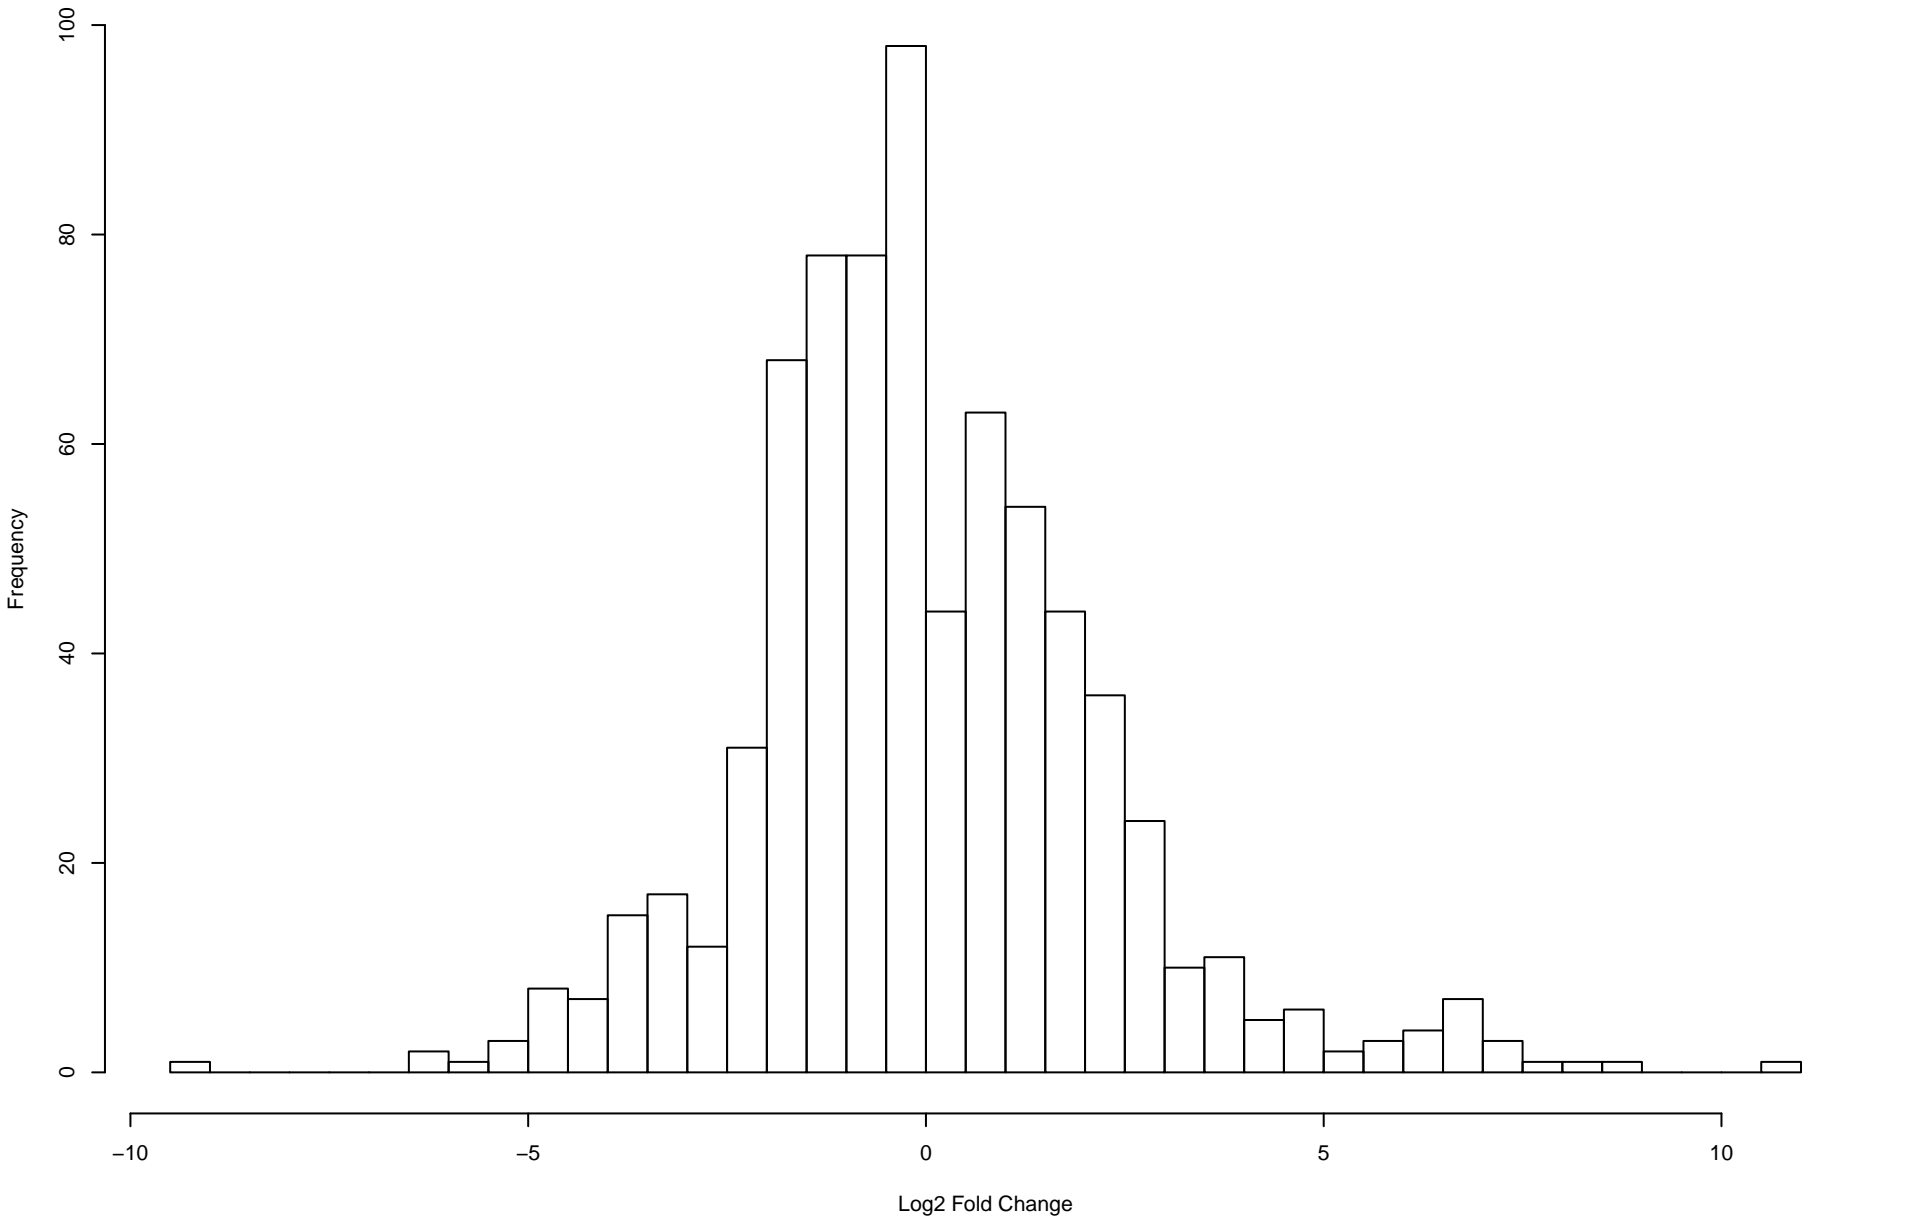

Log2 Fold Change Cat\_8/Cat\_4

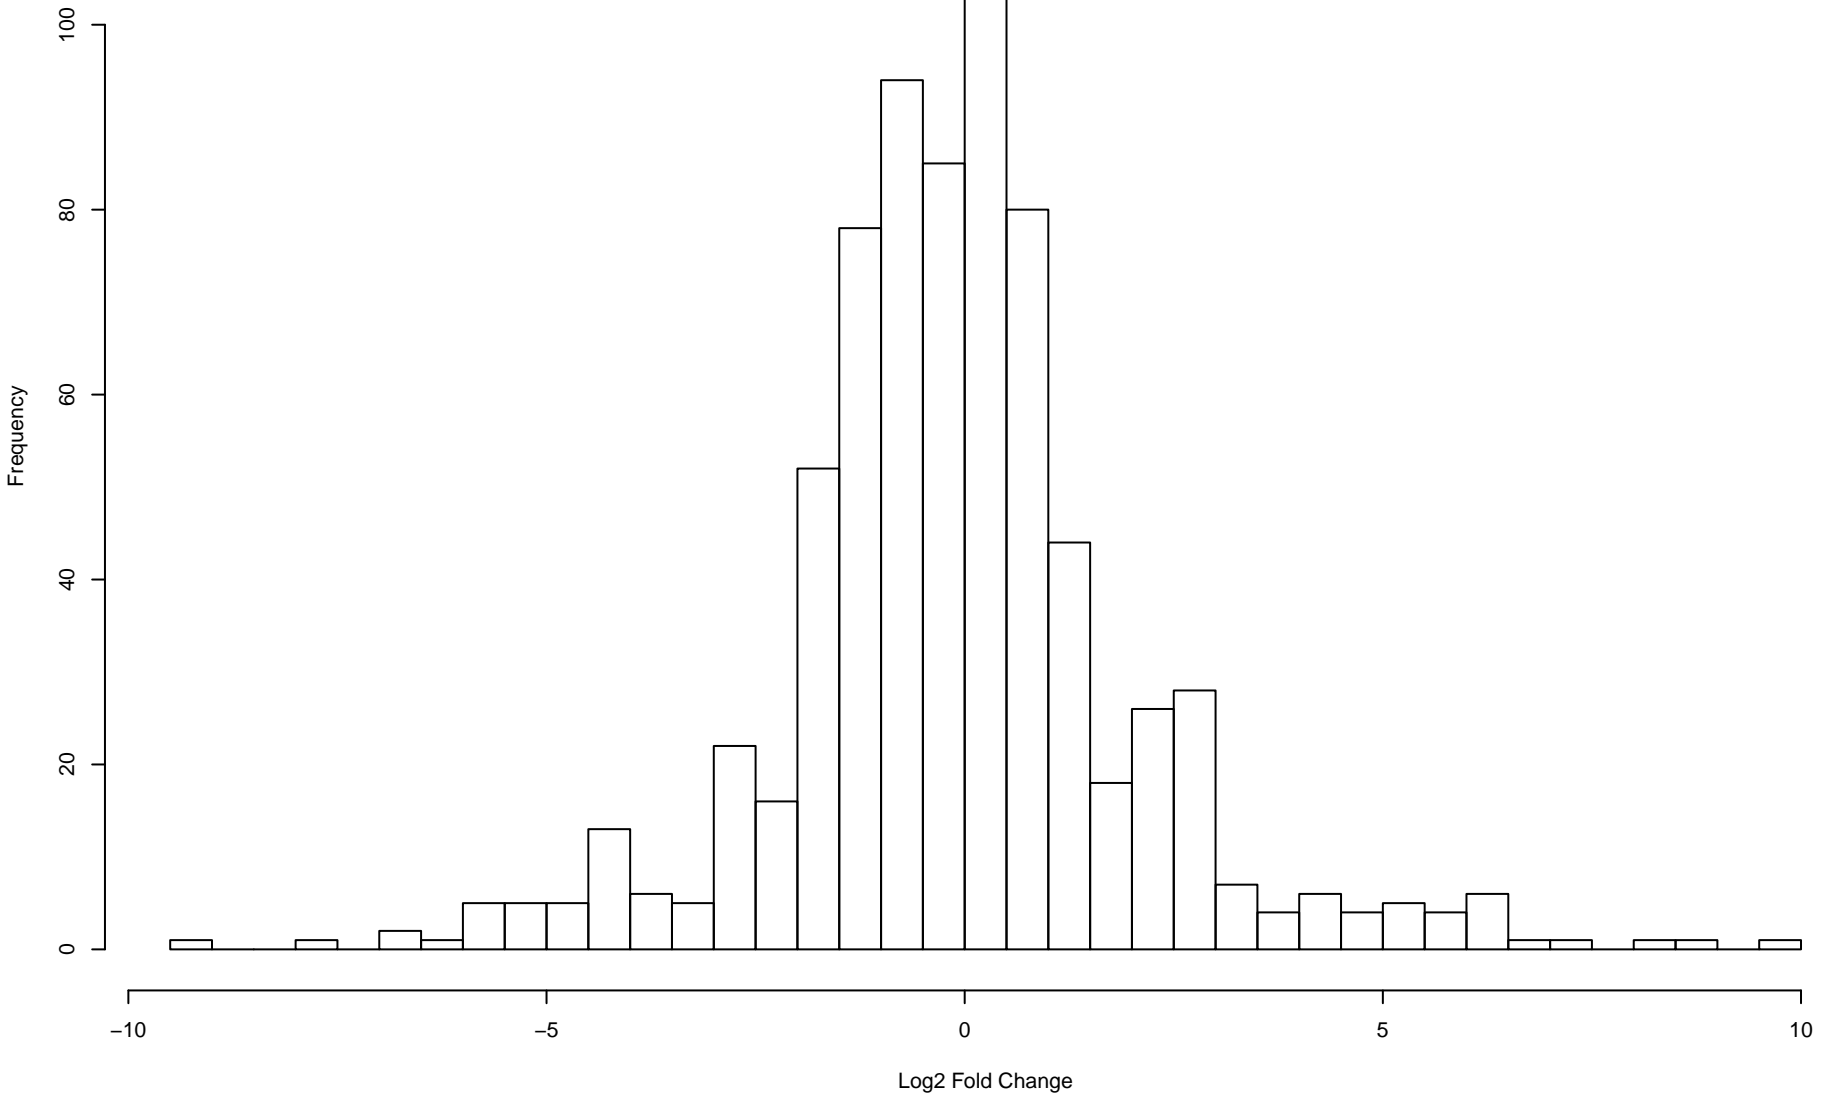

Log2 Fold Change Cat\_10/Cat\_4

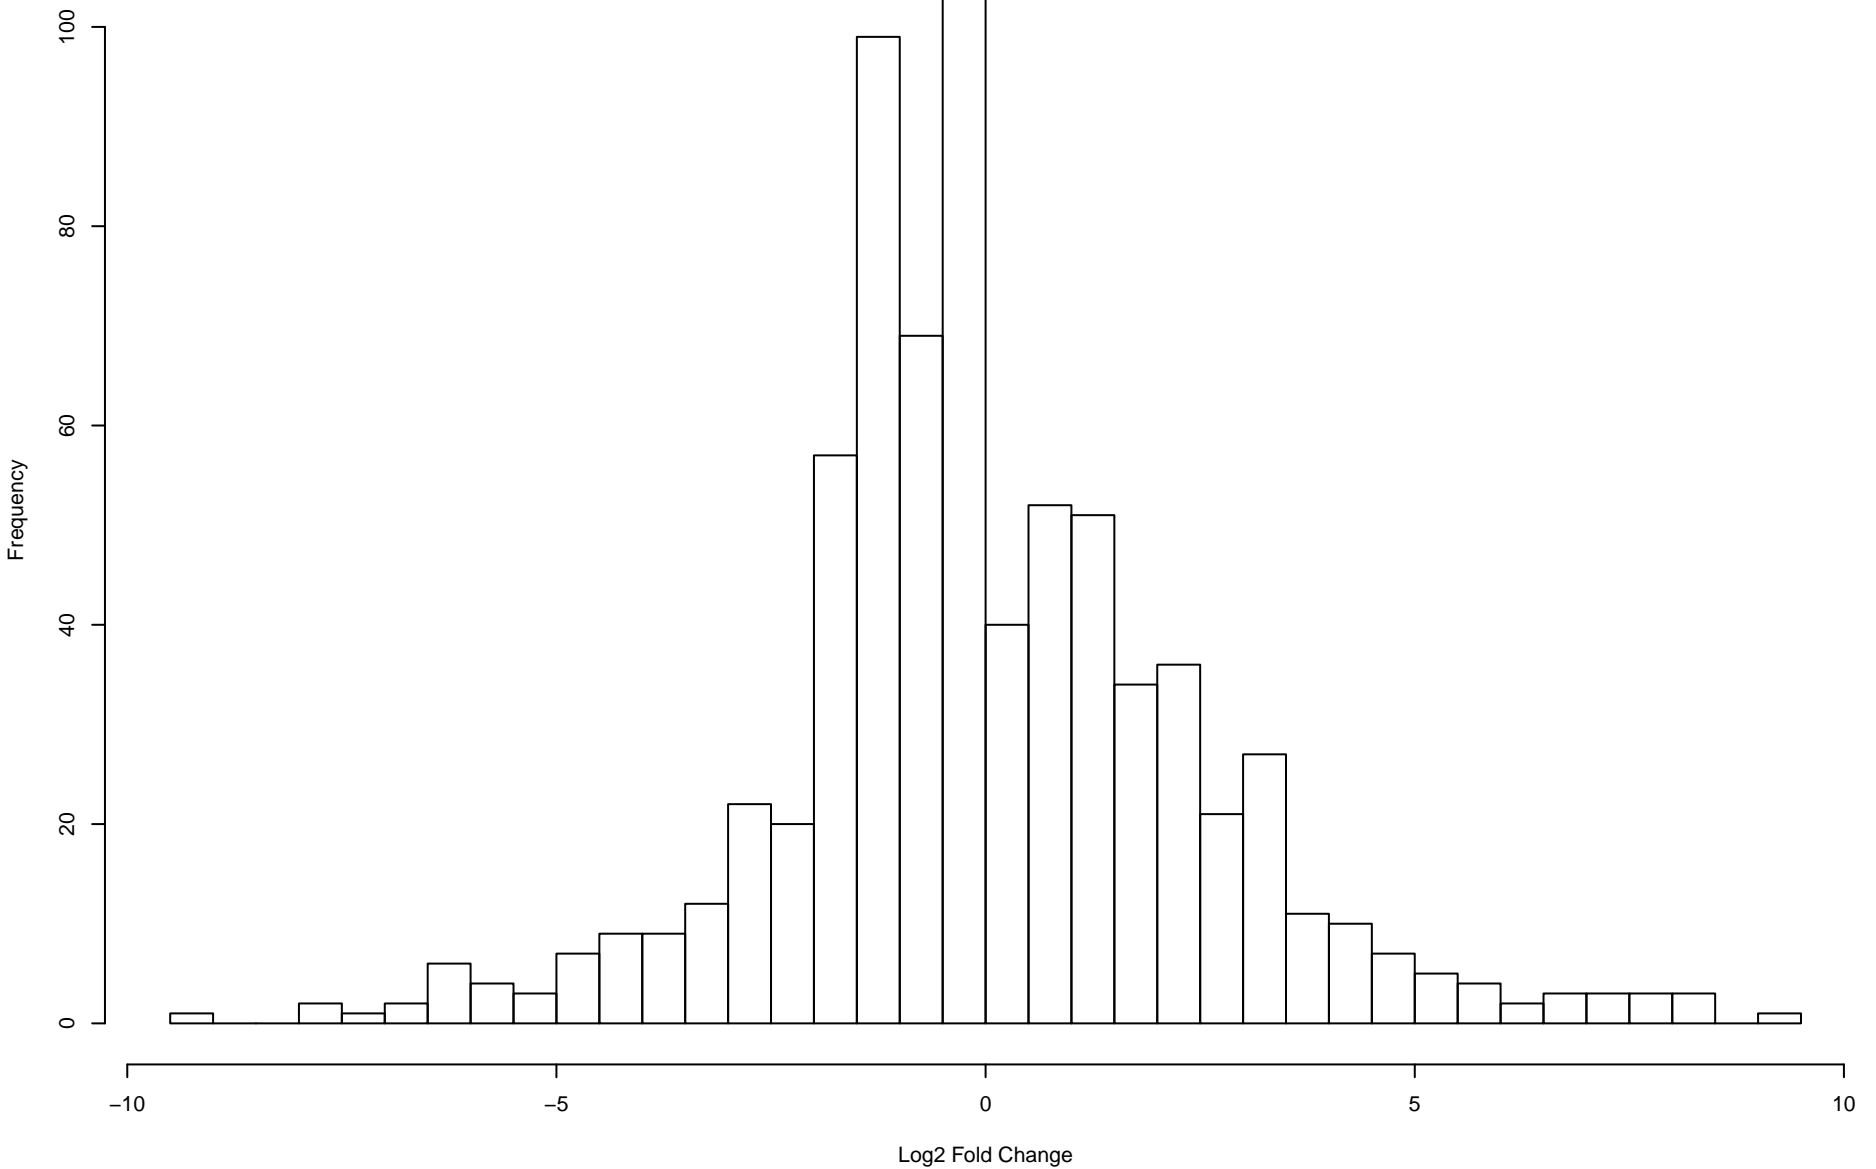

Log2 Fold Change Cat\_9/Cat\_4

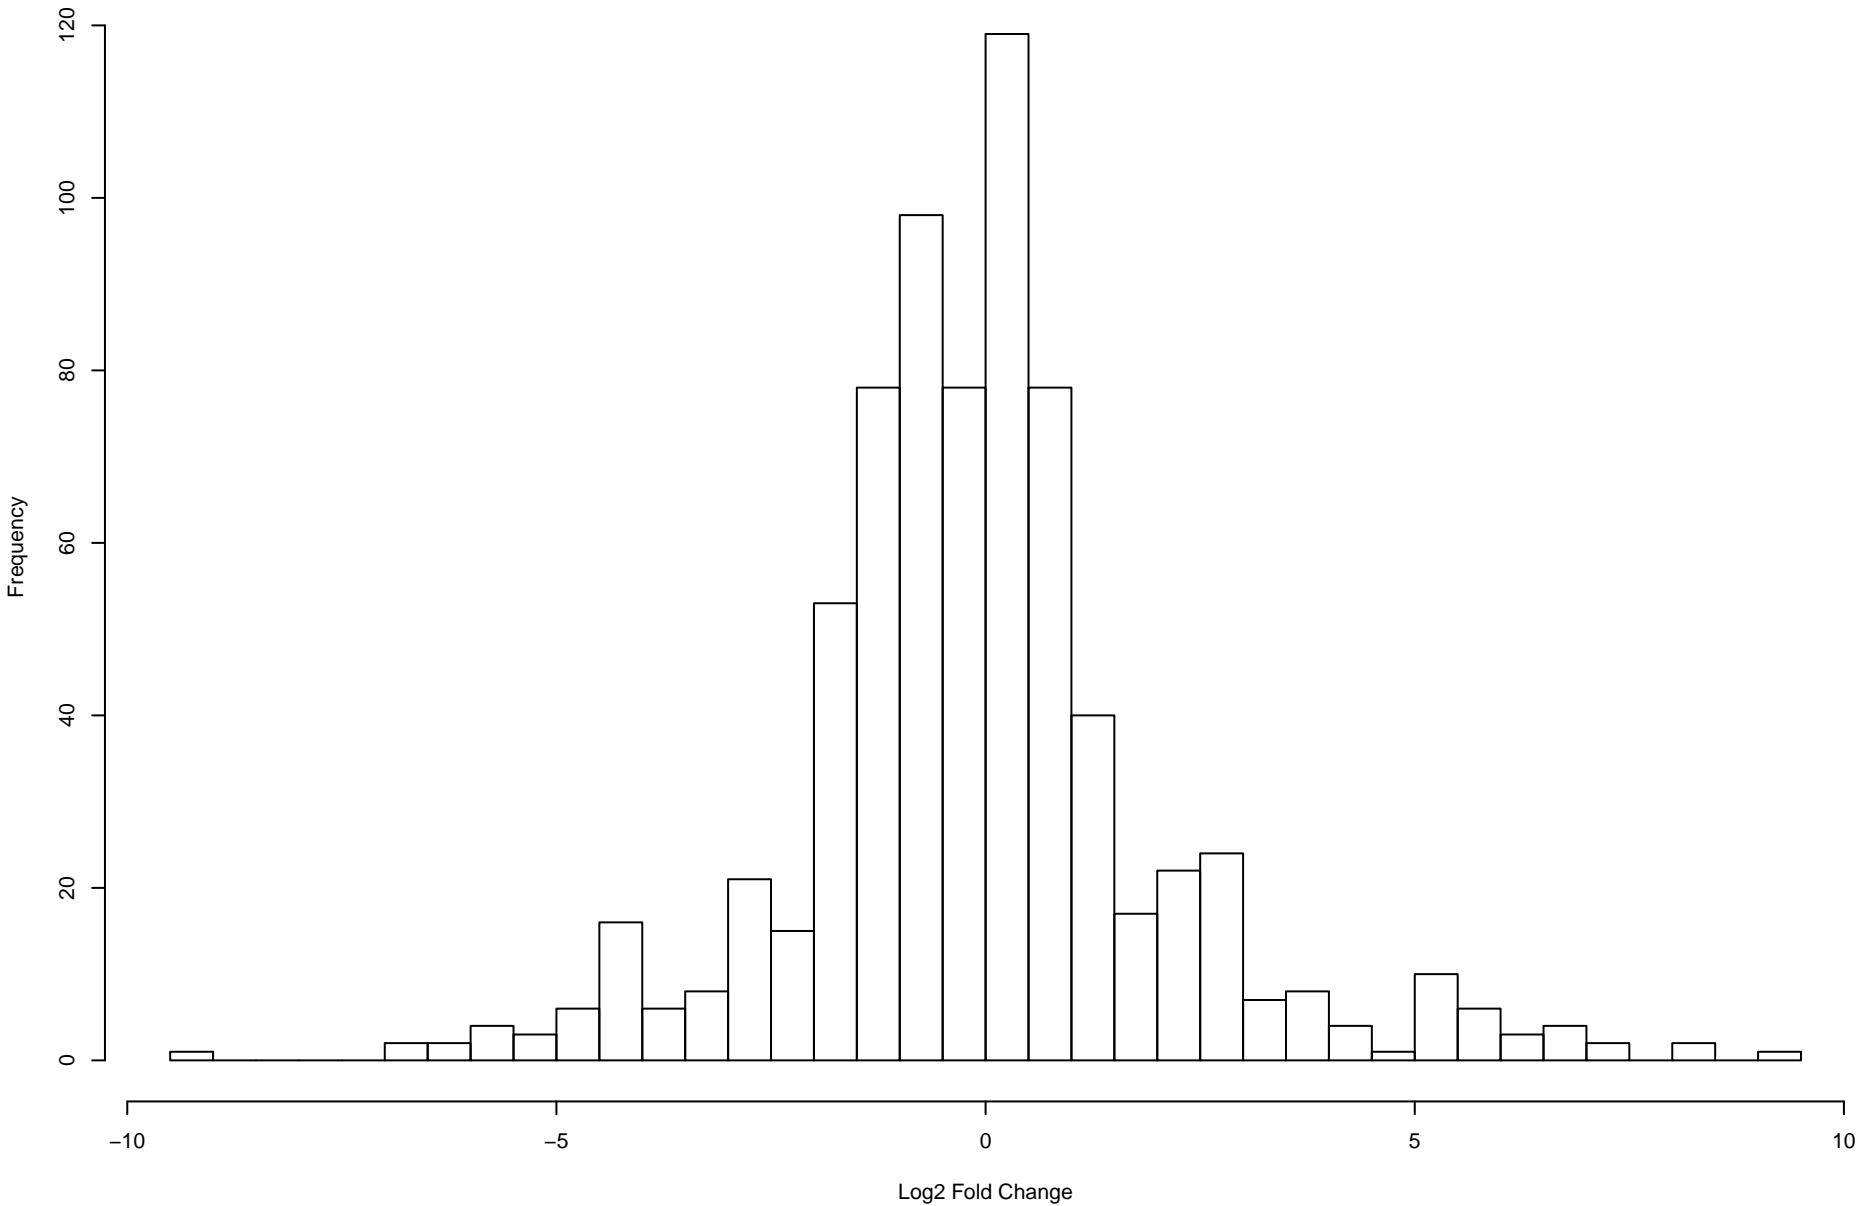

Log2 Fold Change Cat\_6/Cat\_5

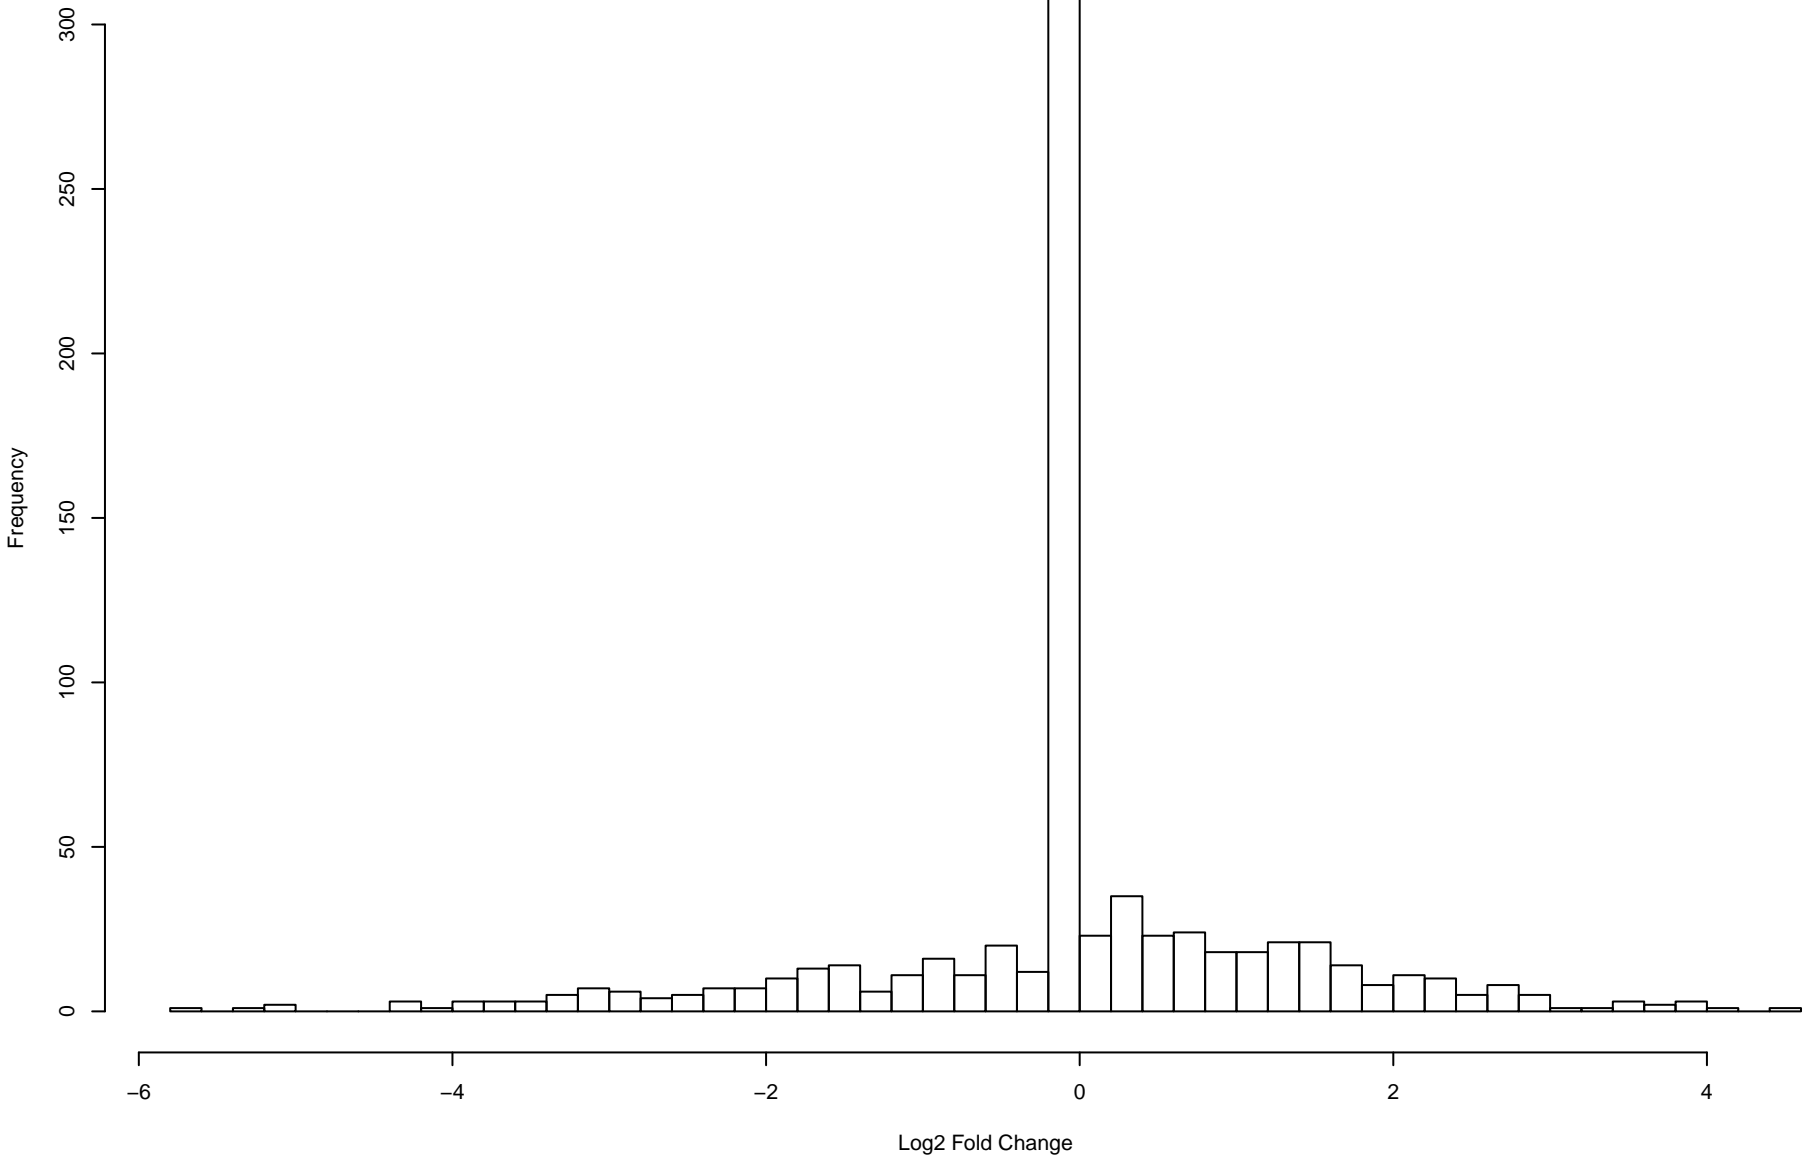



Log2 Fold Change Cat\_7/Cat\_5

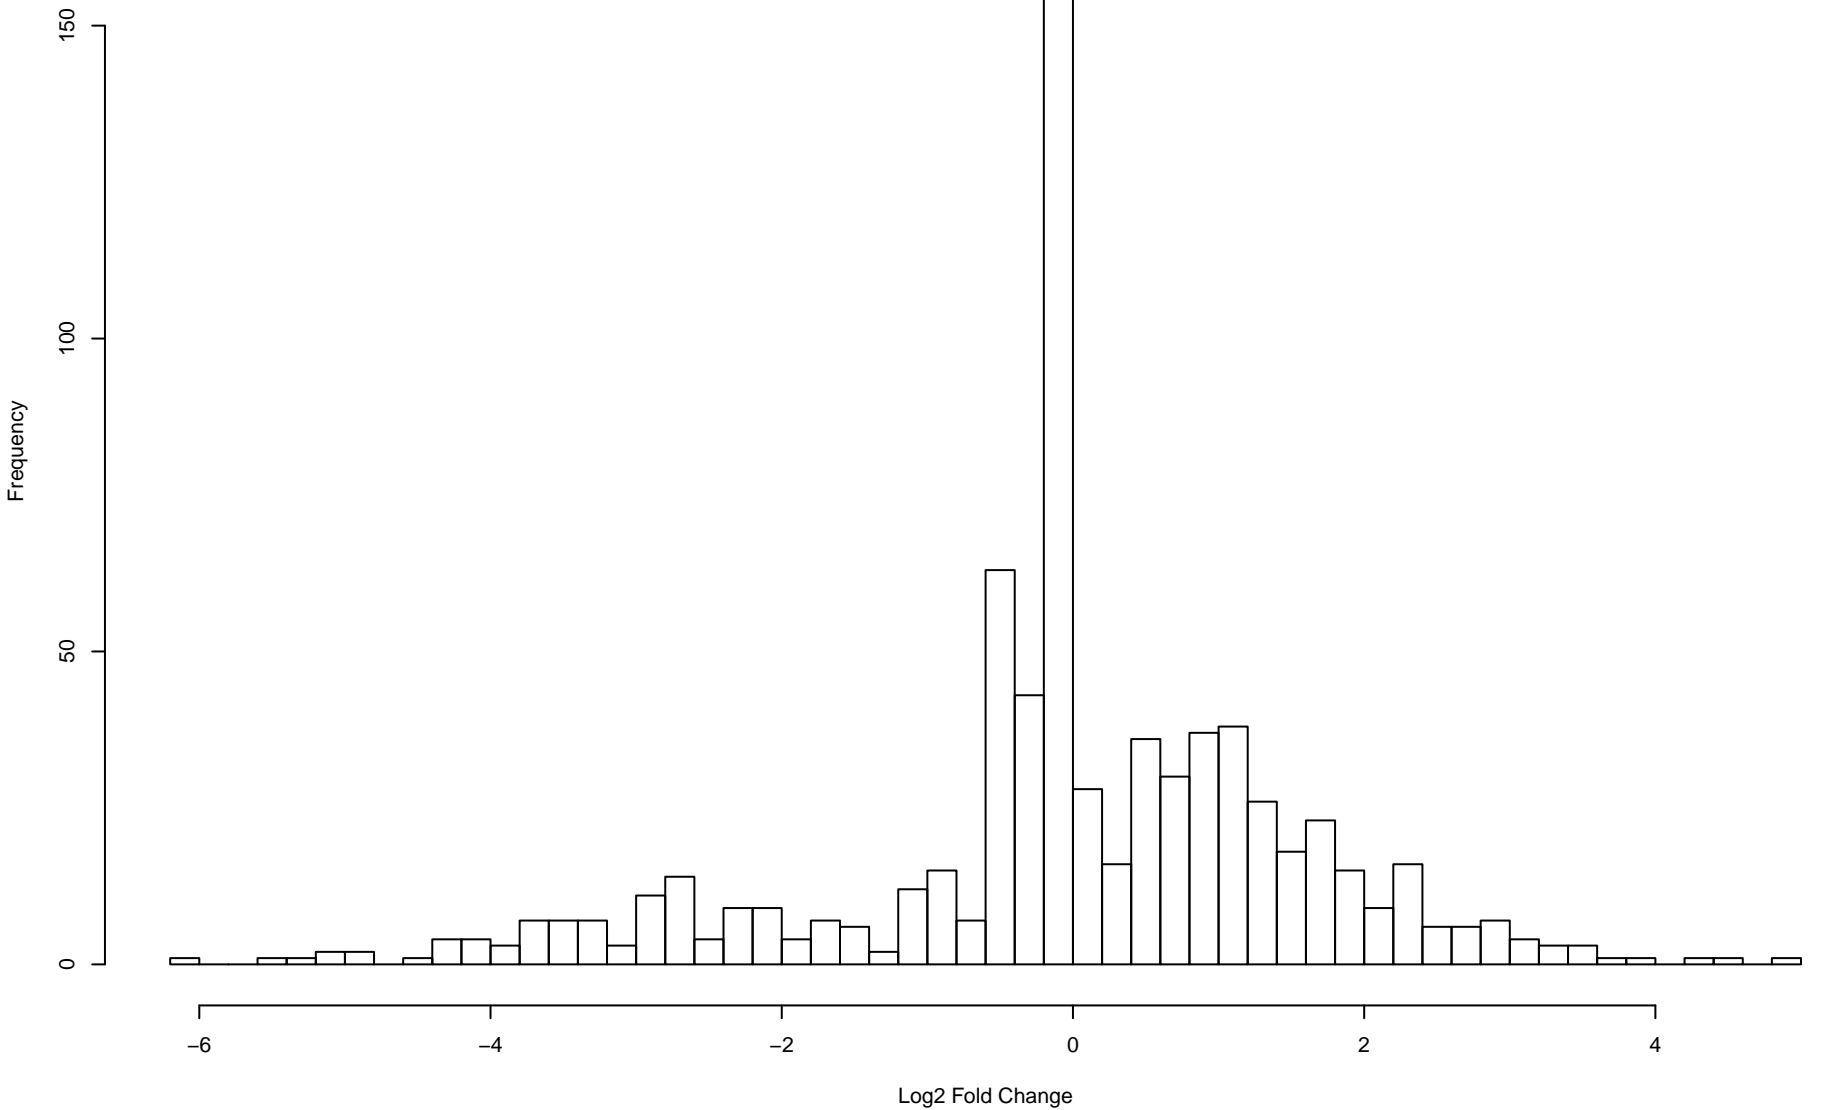

Log2 Fold Change Cat\_8/Cat\_5

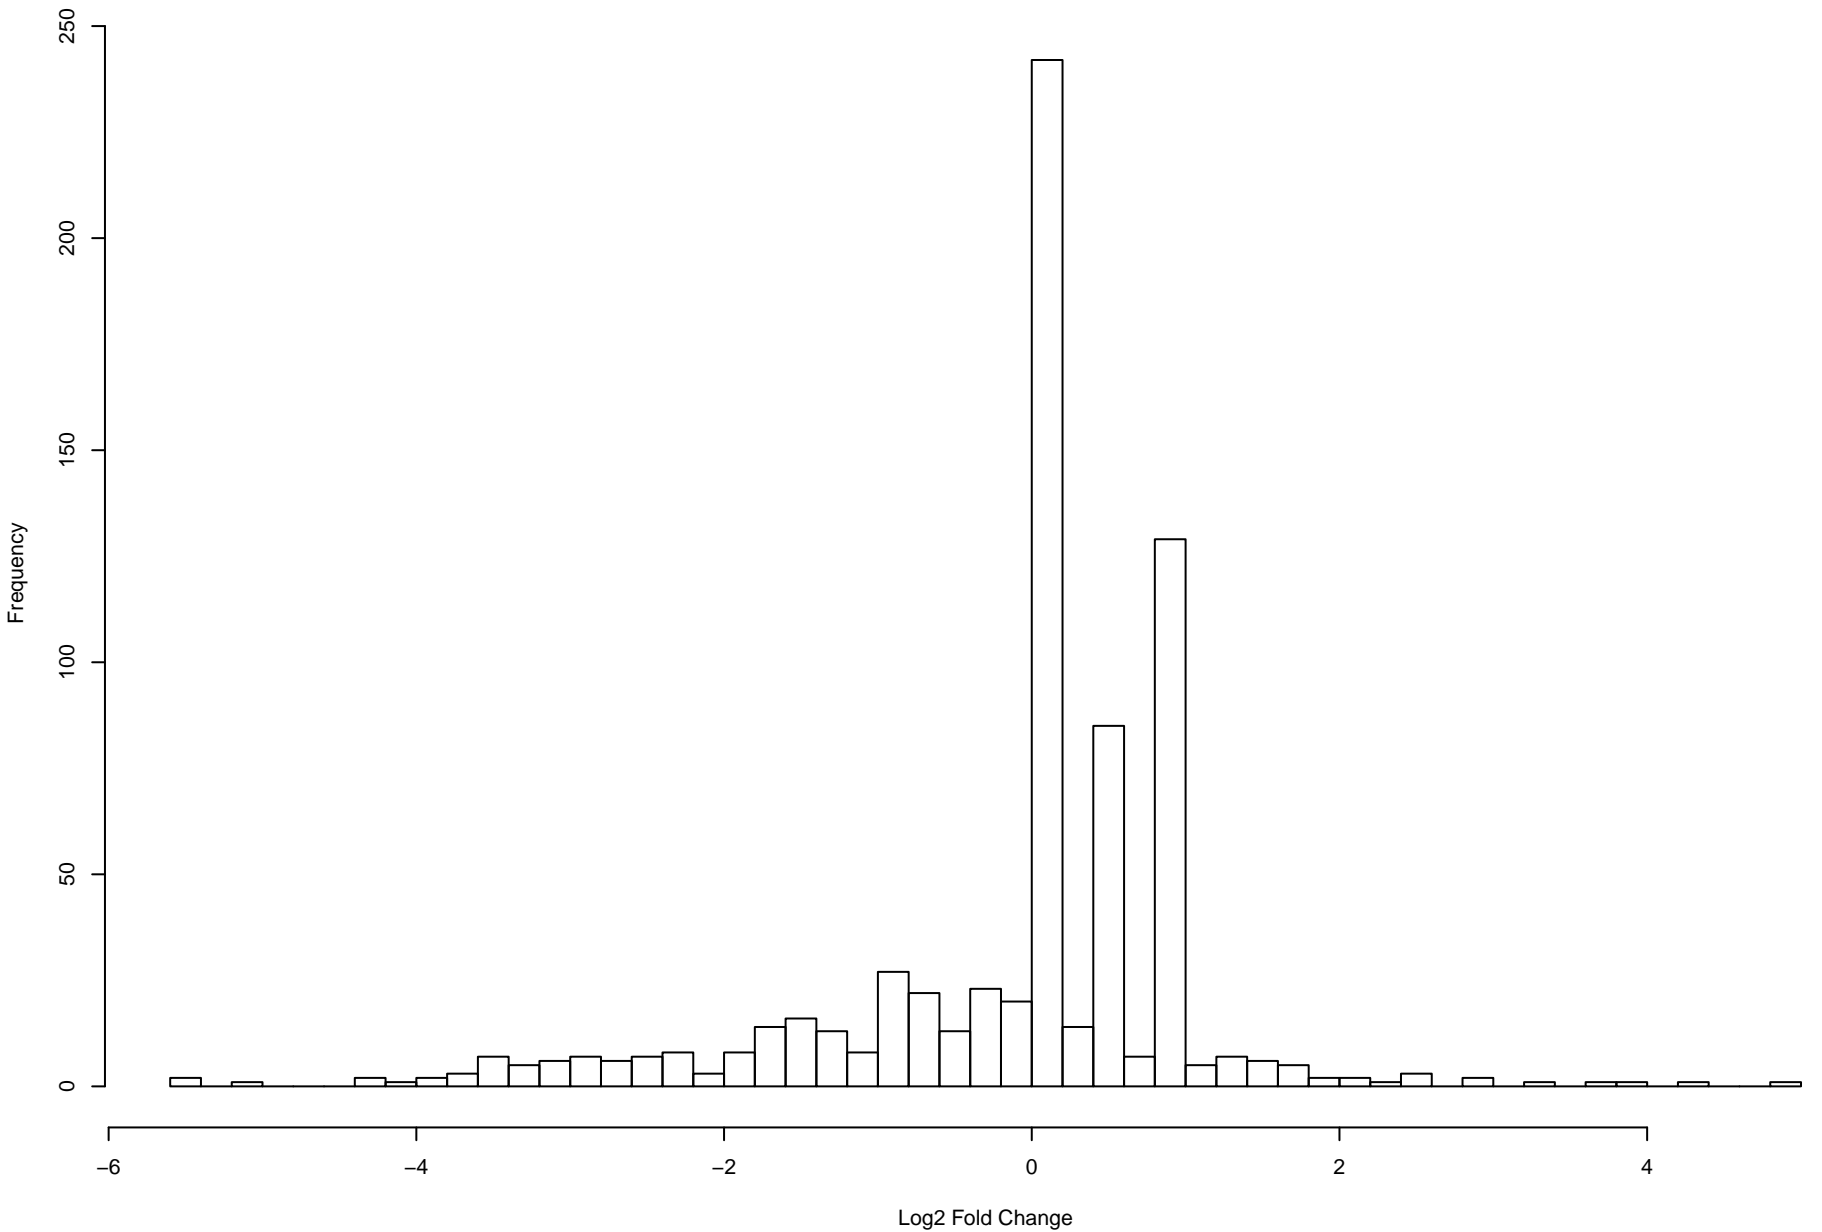

Log2 Fold Change Cat\_10/Cat\_5

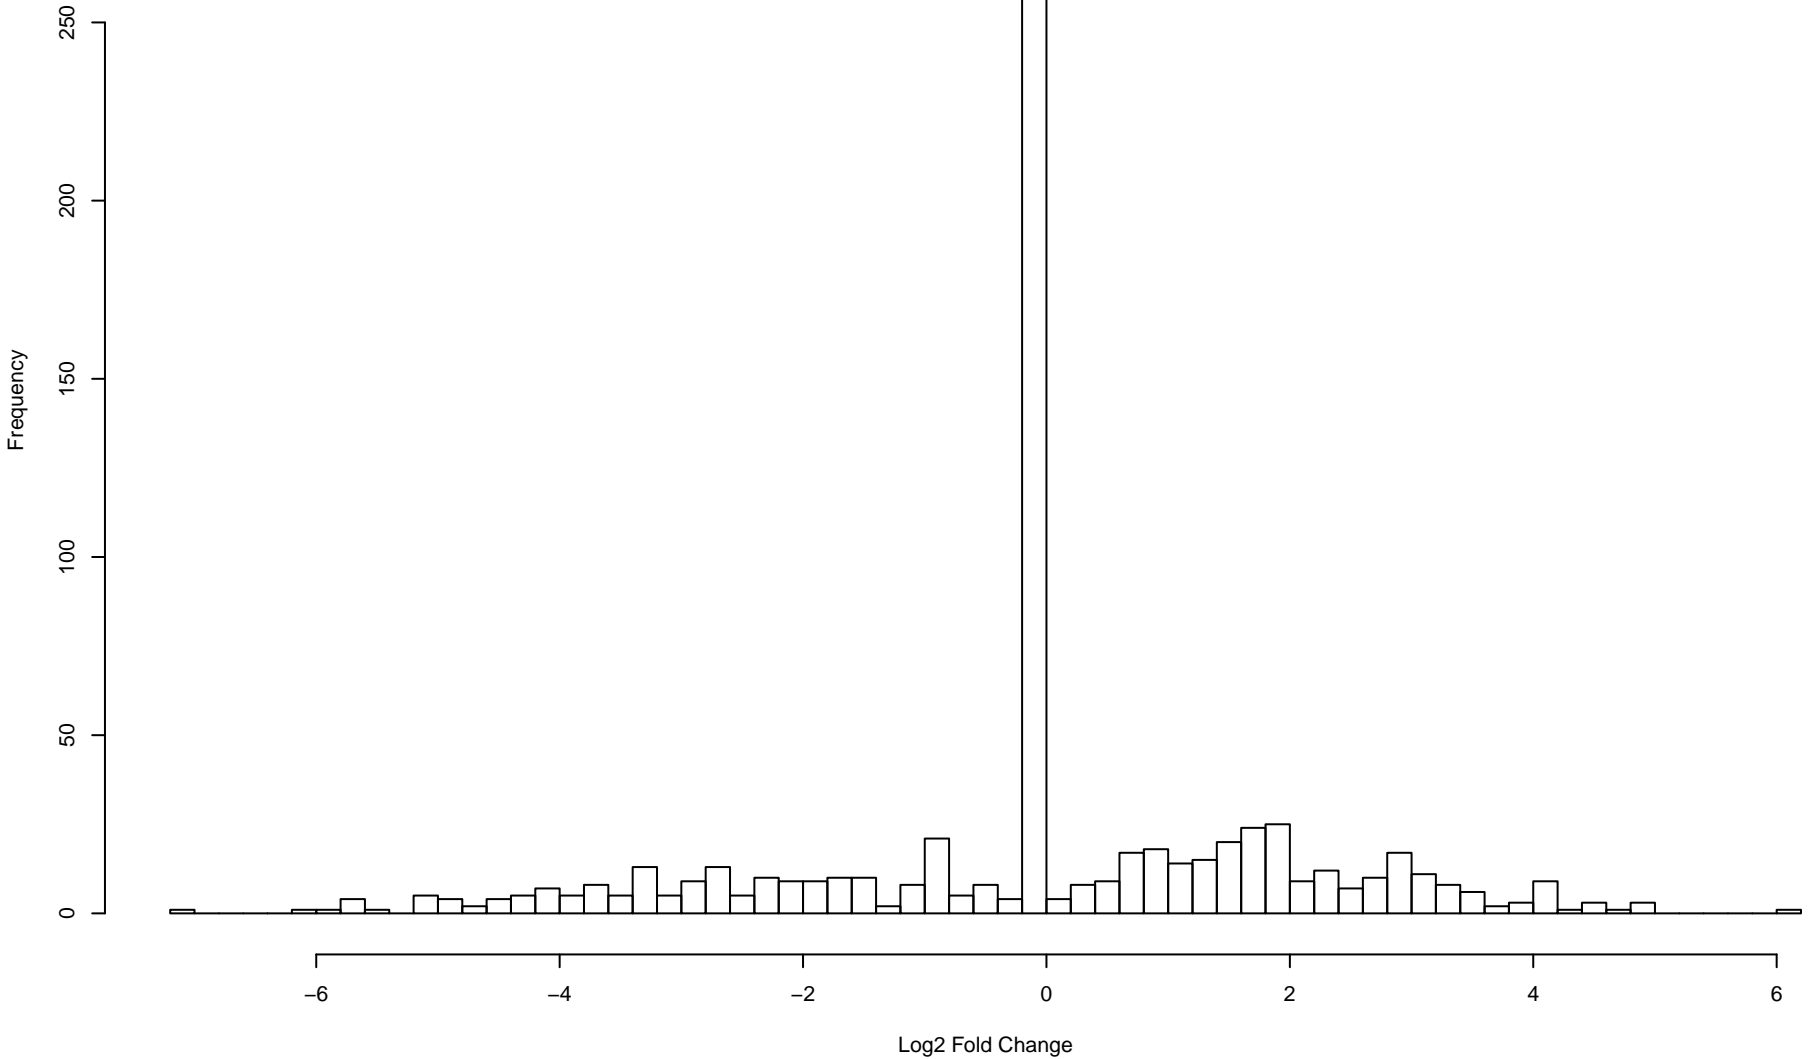

Log2 Fold Change Cat\_9/Cat\_5

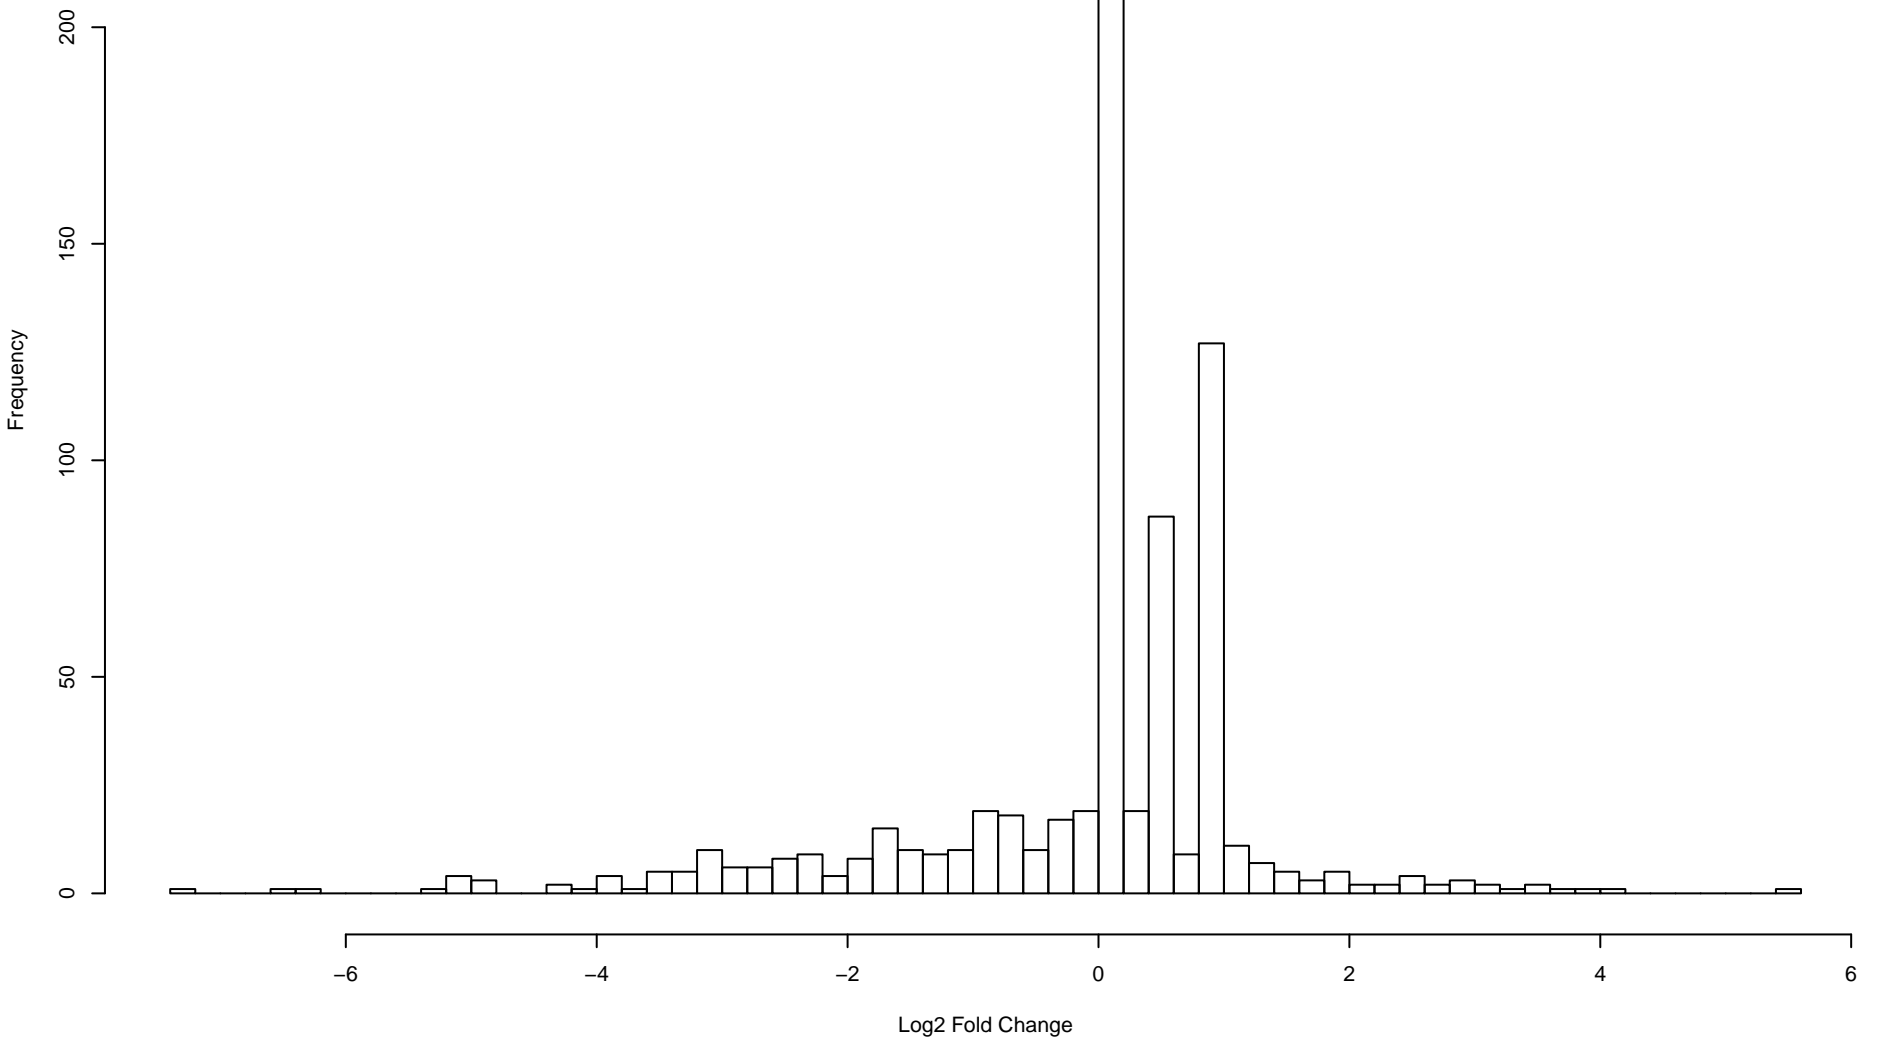

Log2 Fold Change Cat\_7/Cat\_6

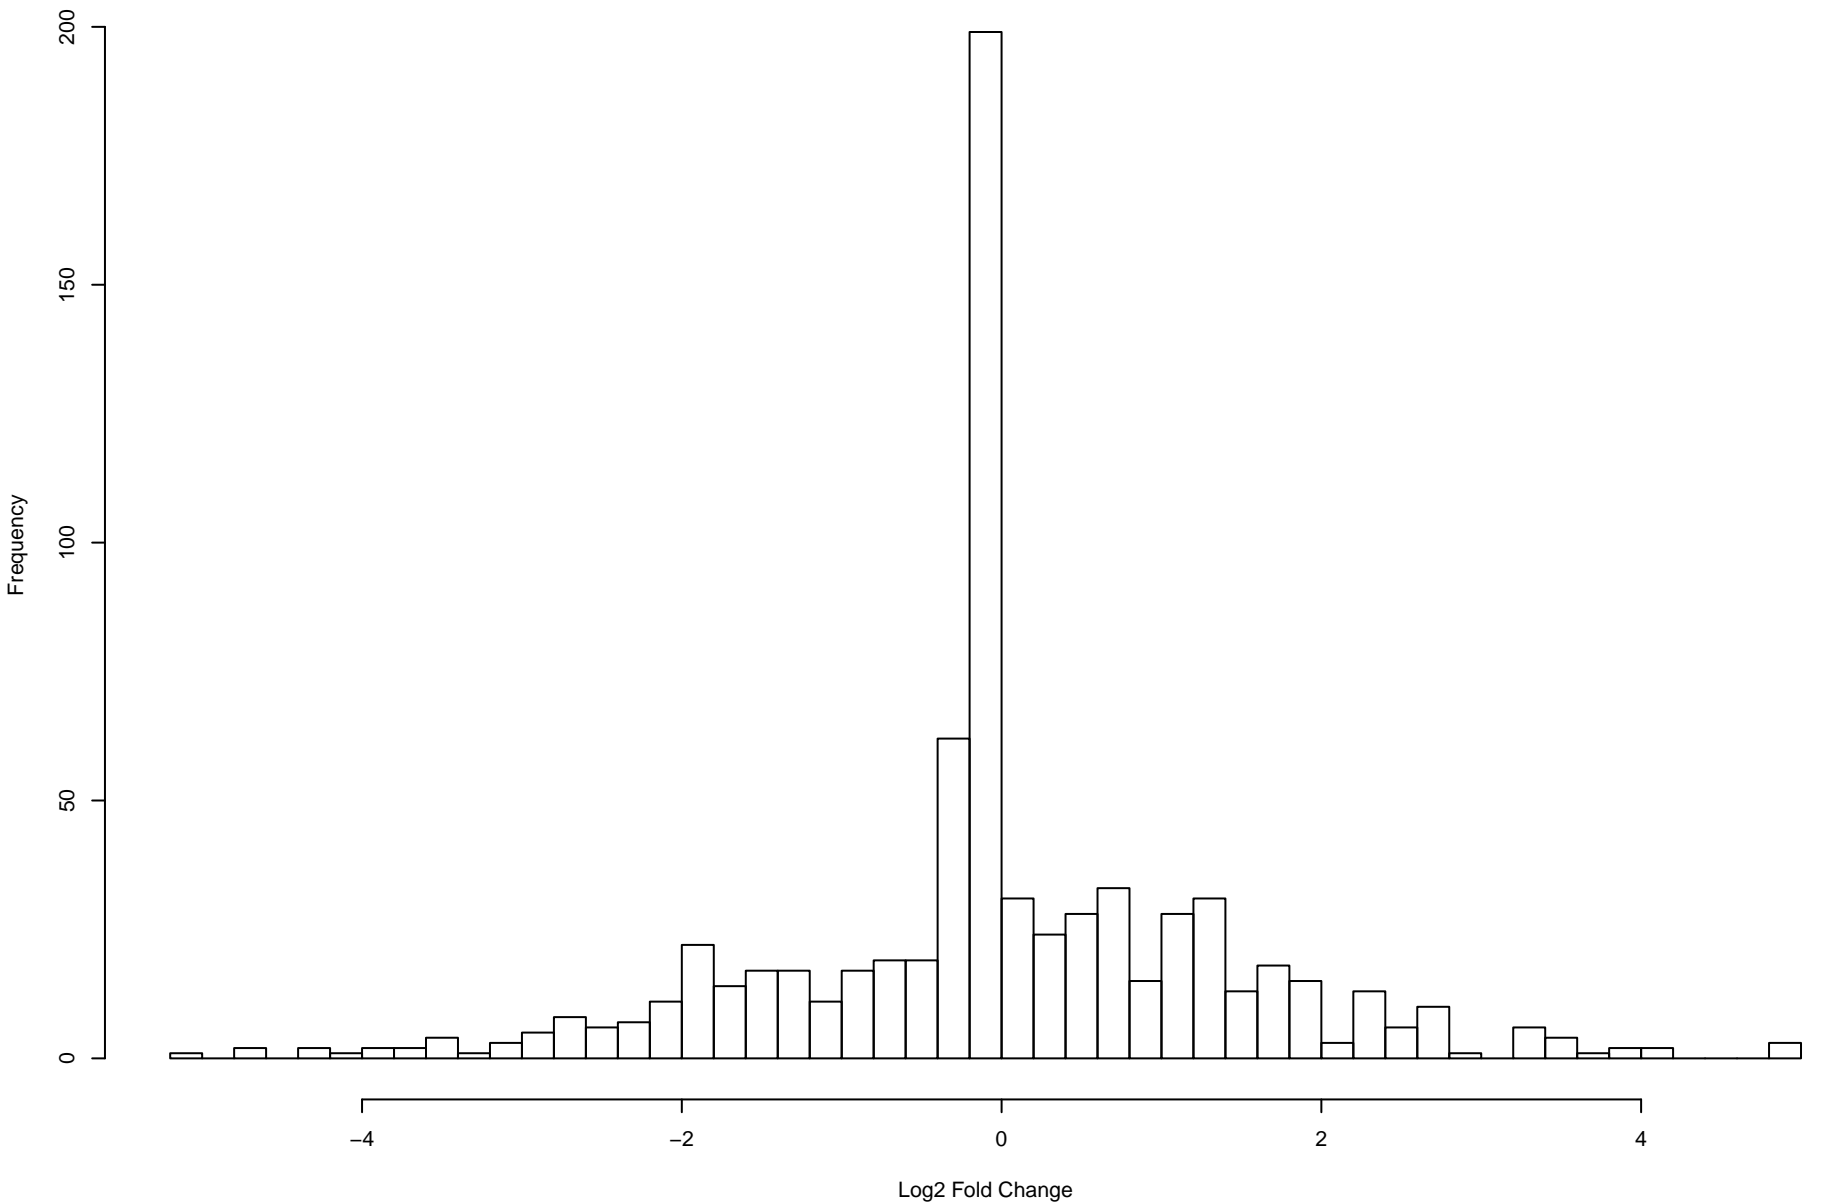

Log2 Fold Change Cat\_8/Cat\_6

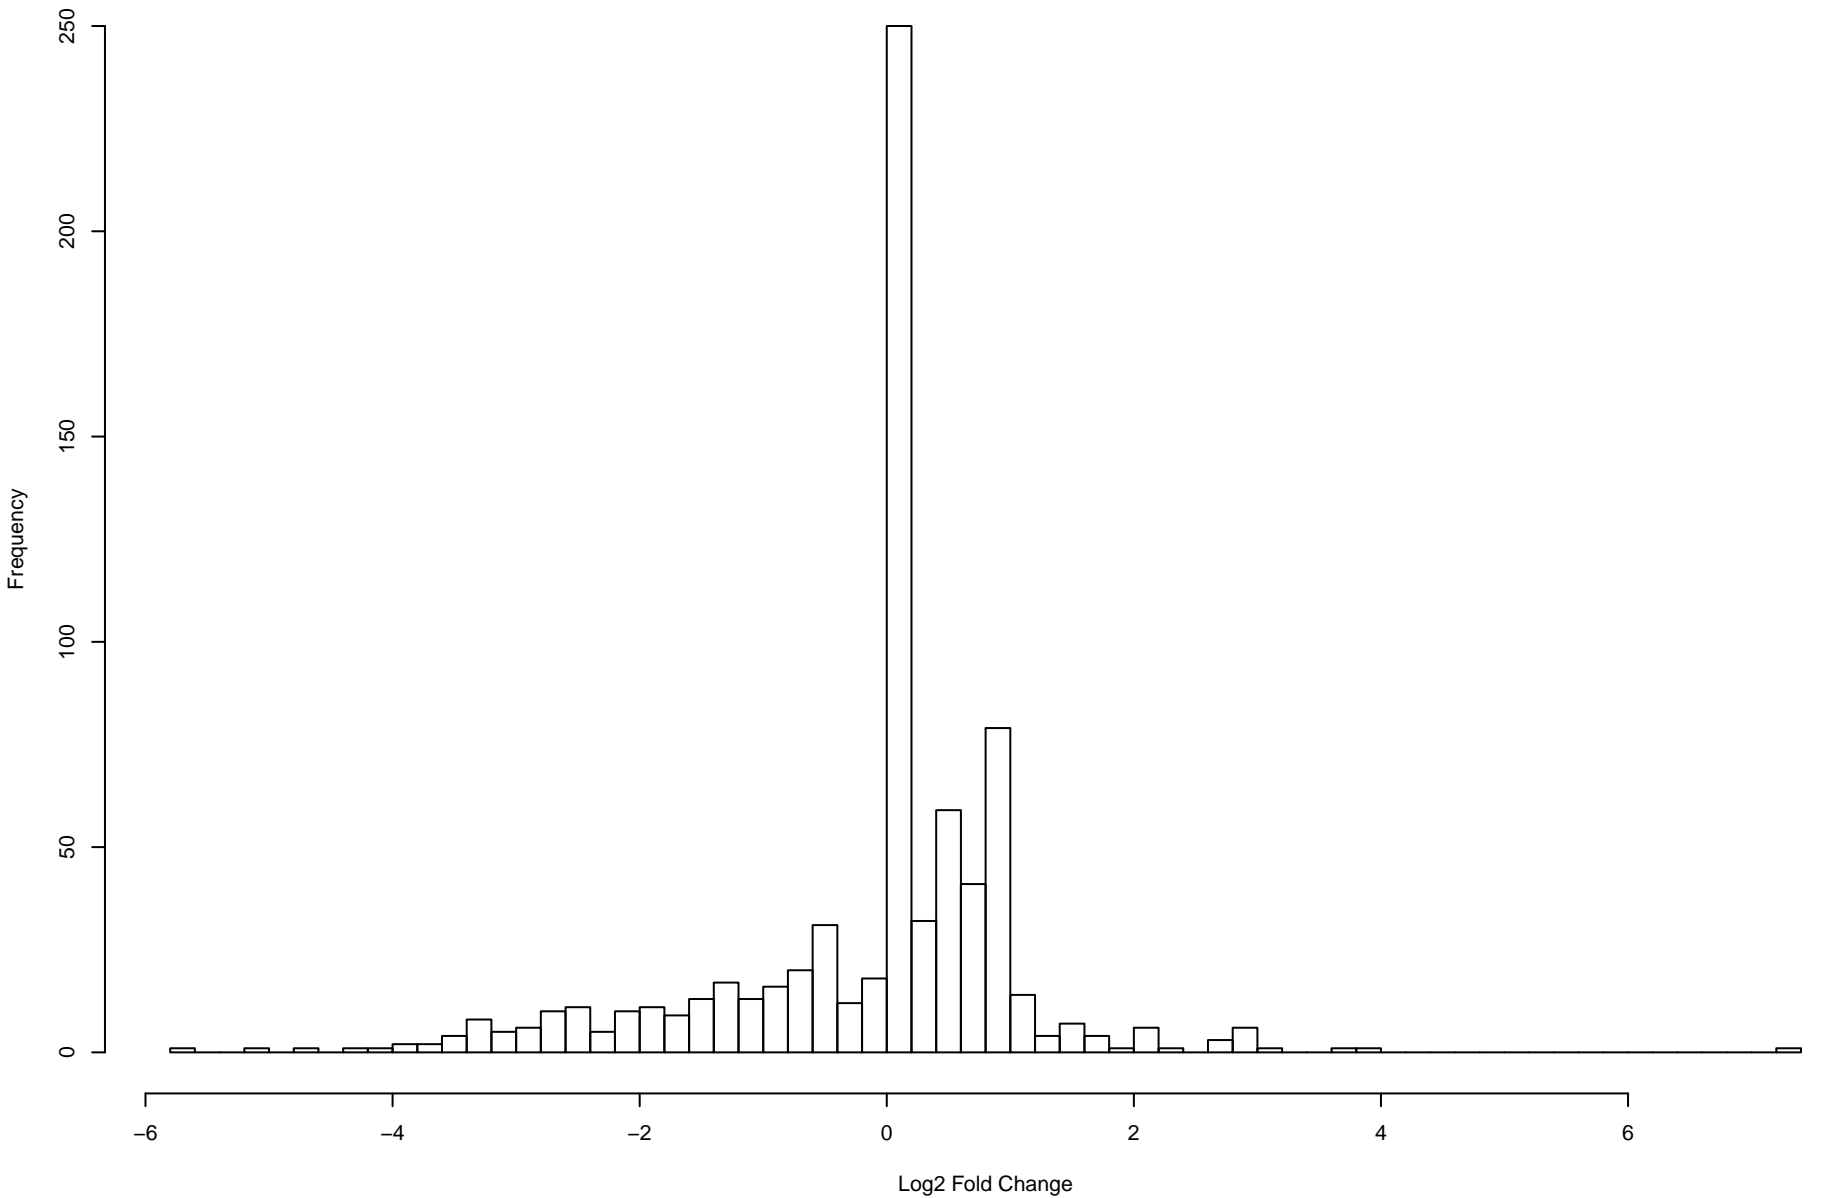

Log2 Fold Change Cat\_10/Cat\_6

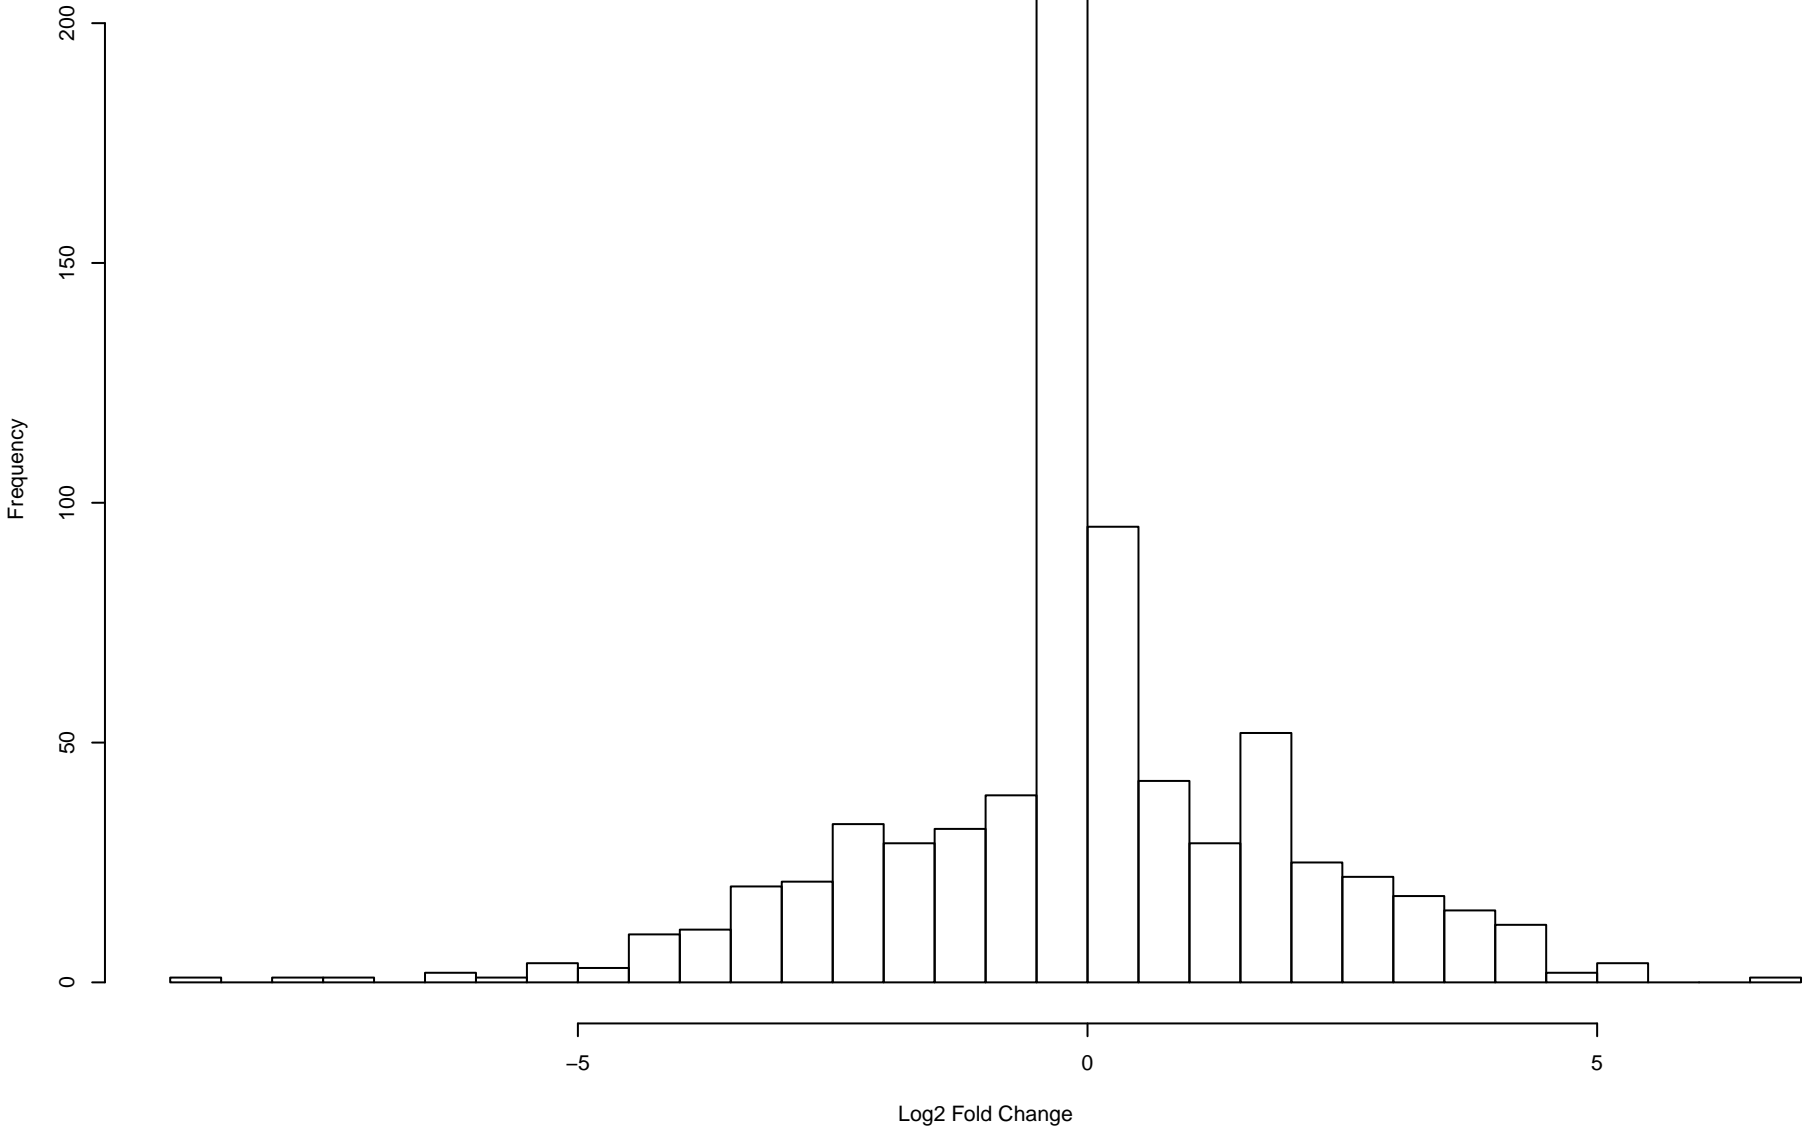

Log2 Fold Change Cat\_9/Cat\_6

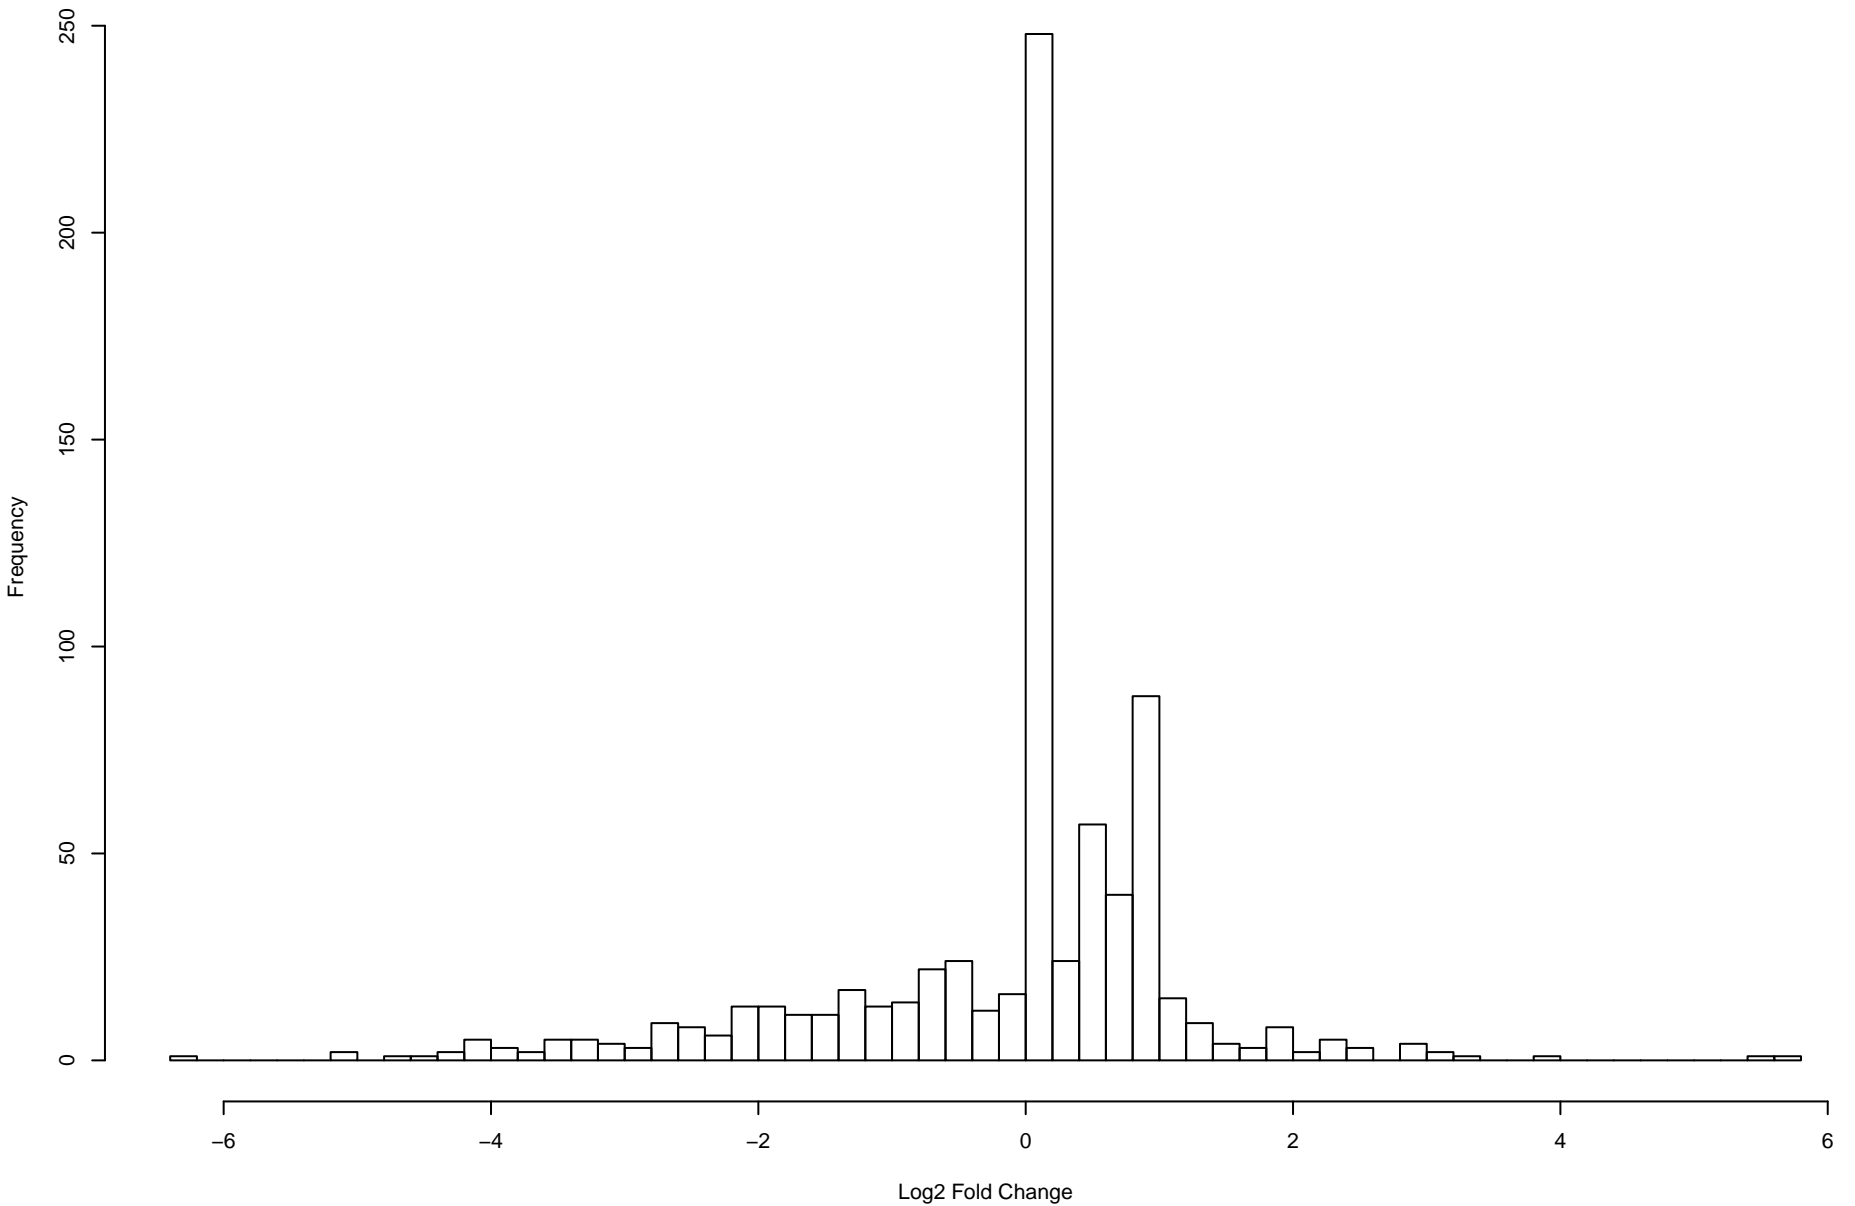



Log2 Fold Change Cat\_8/Cat\_7

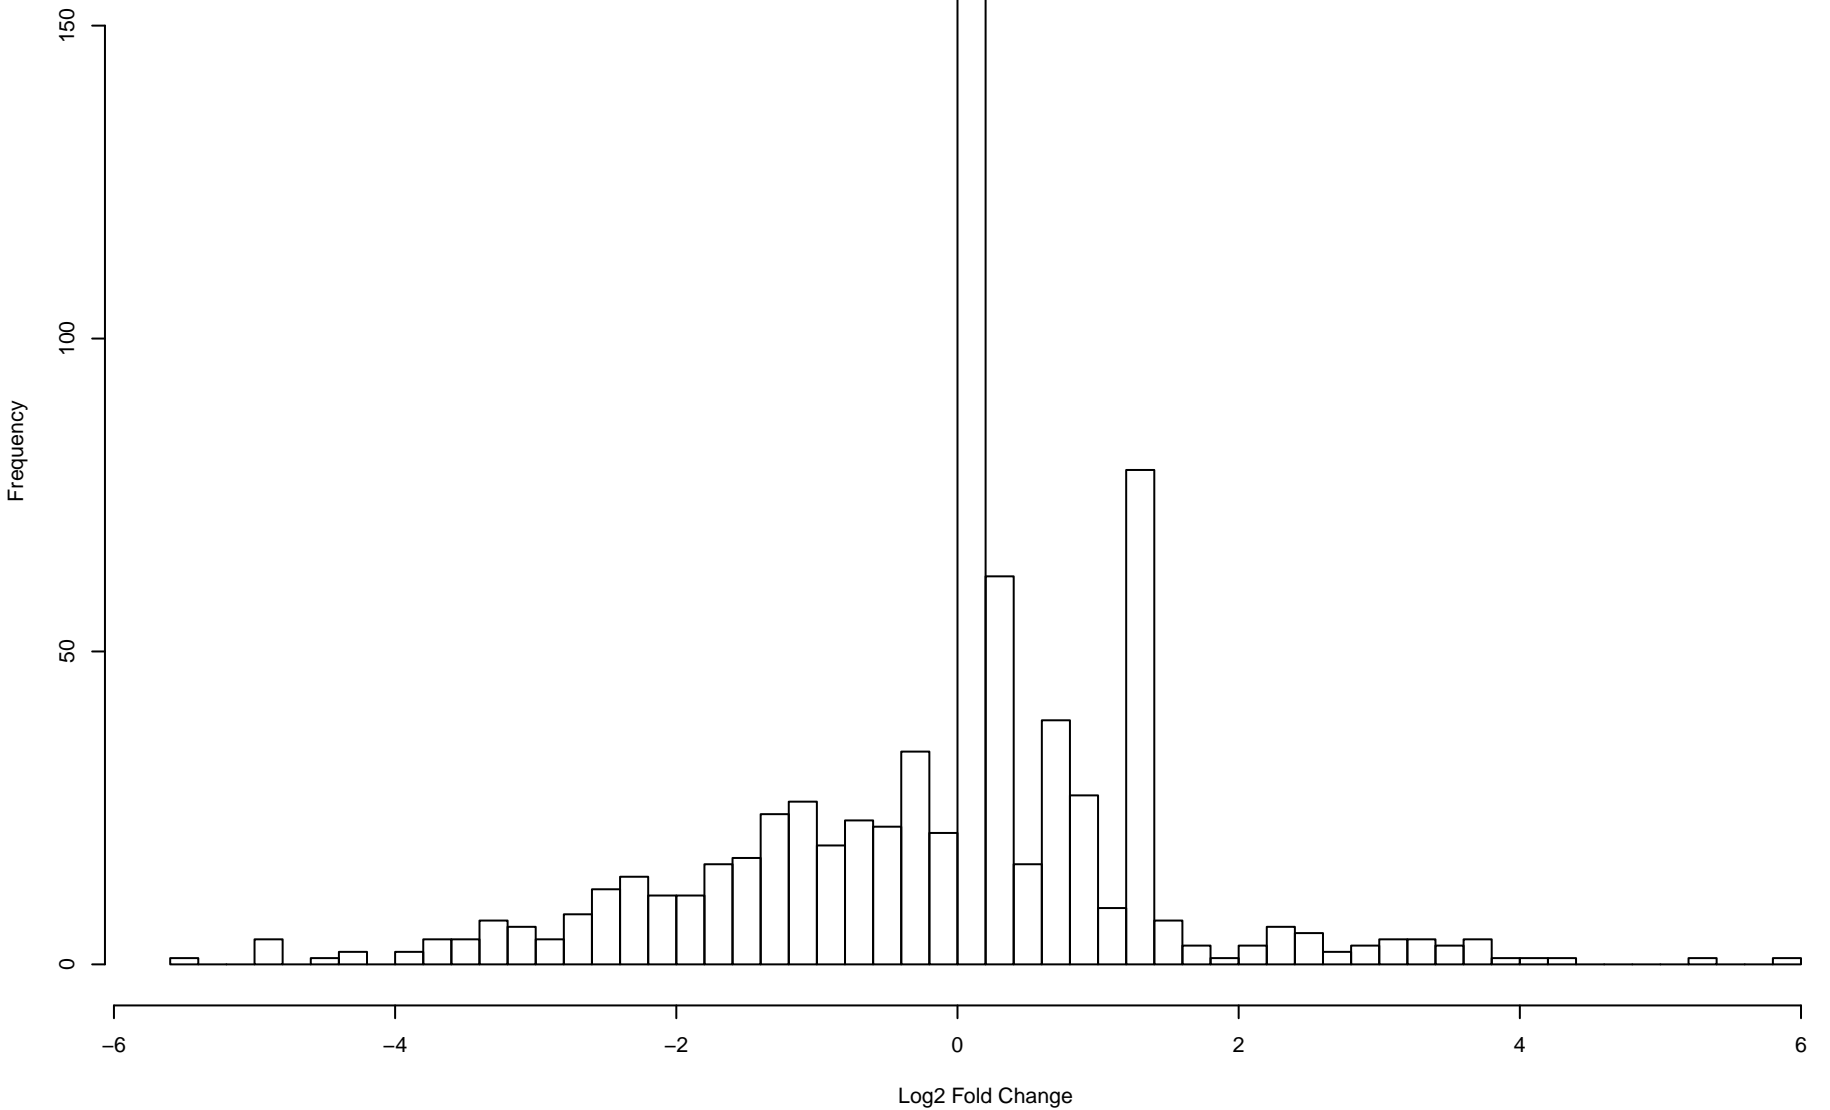

Log2 Fold Change Cat\_10/Cat\_7

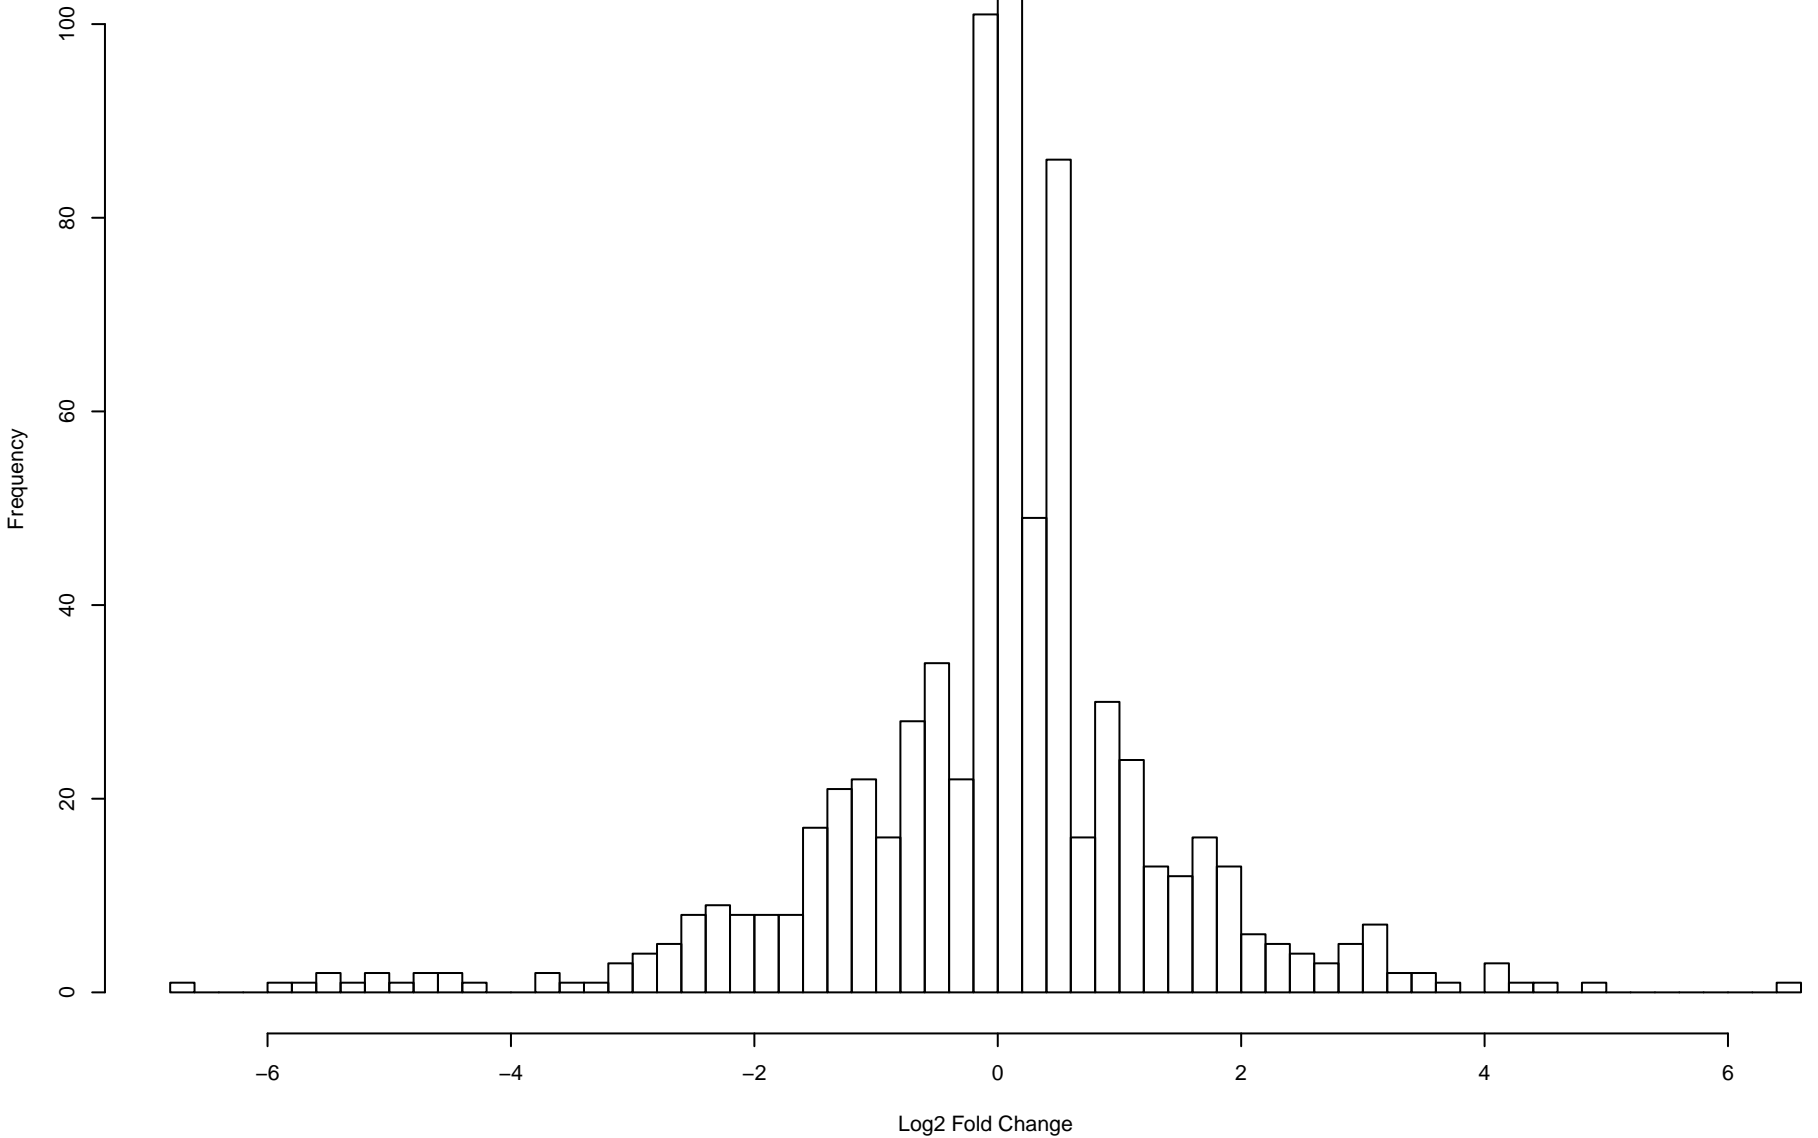

Log2 Fold Change Cat\_9/Cat\_7

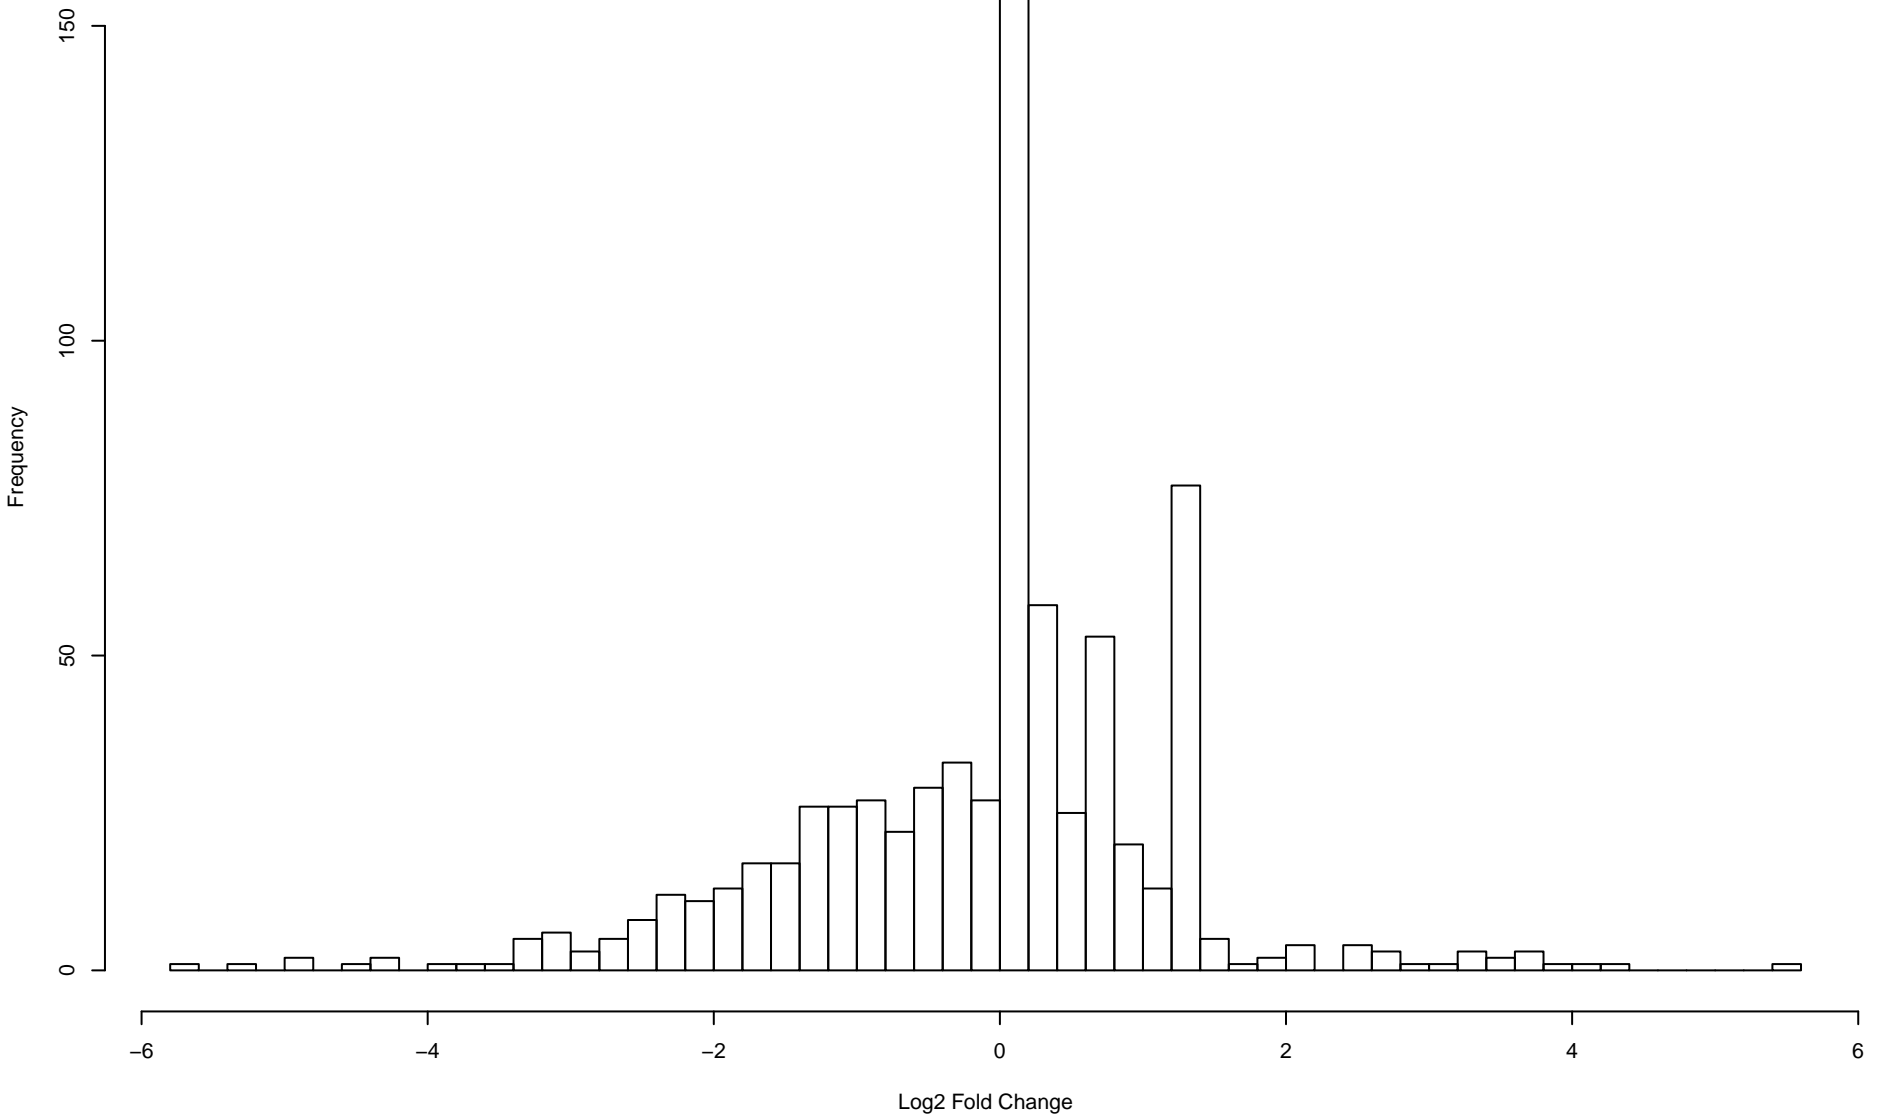

Log2 Fold Change Cat\_10/Cat\_8

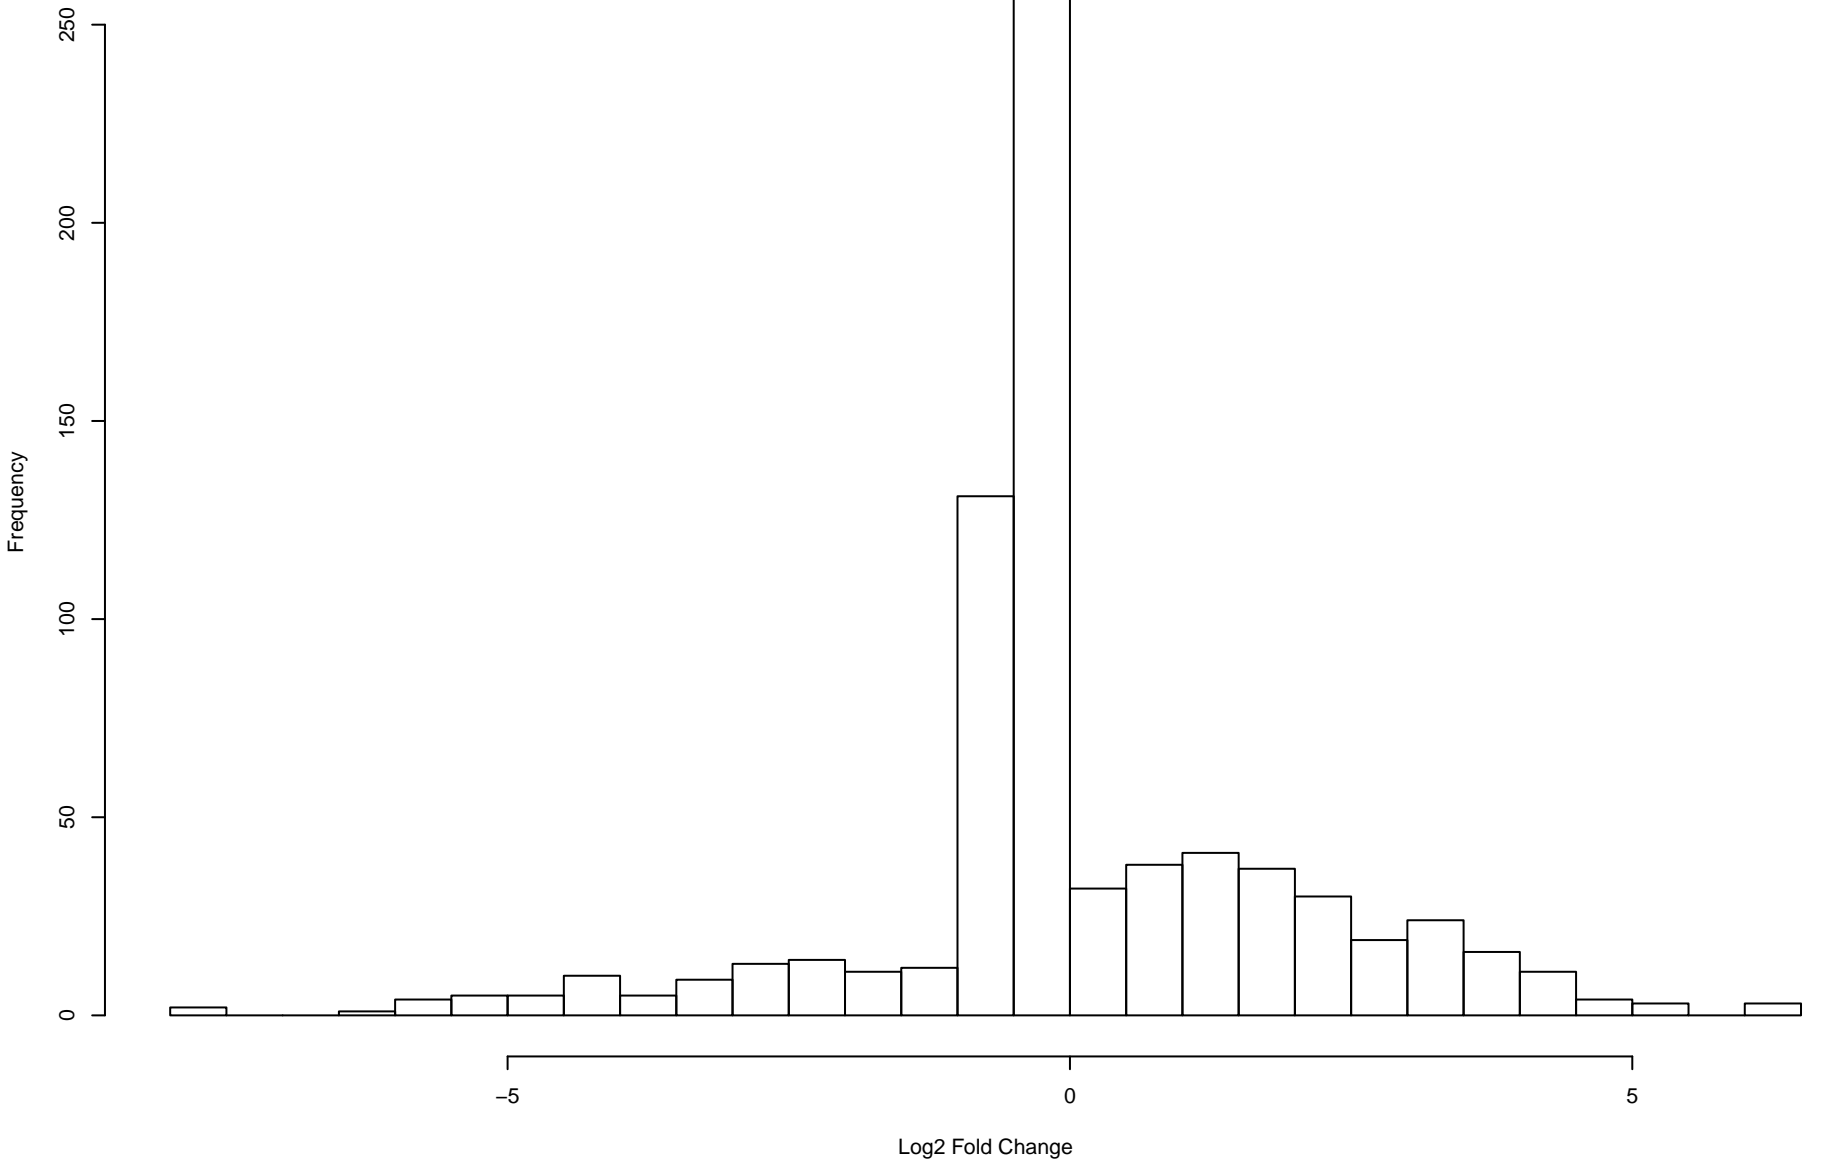

Log2 Fold Change Cat\_9/Cat\_8

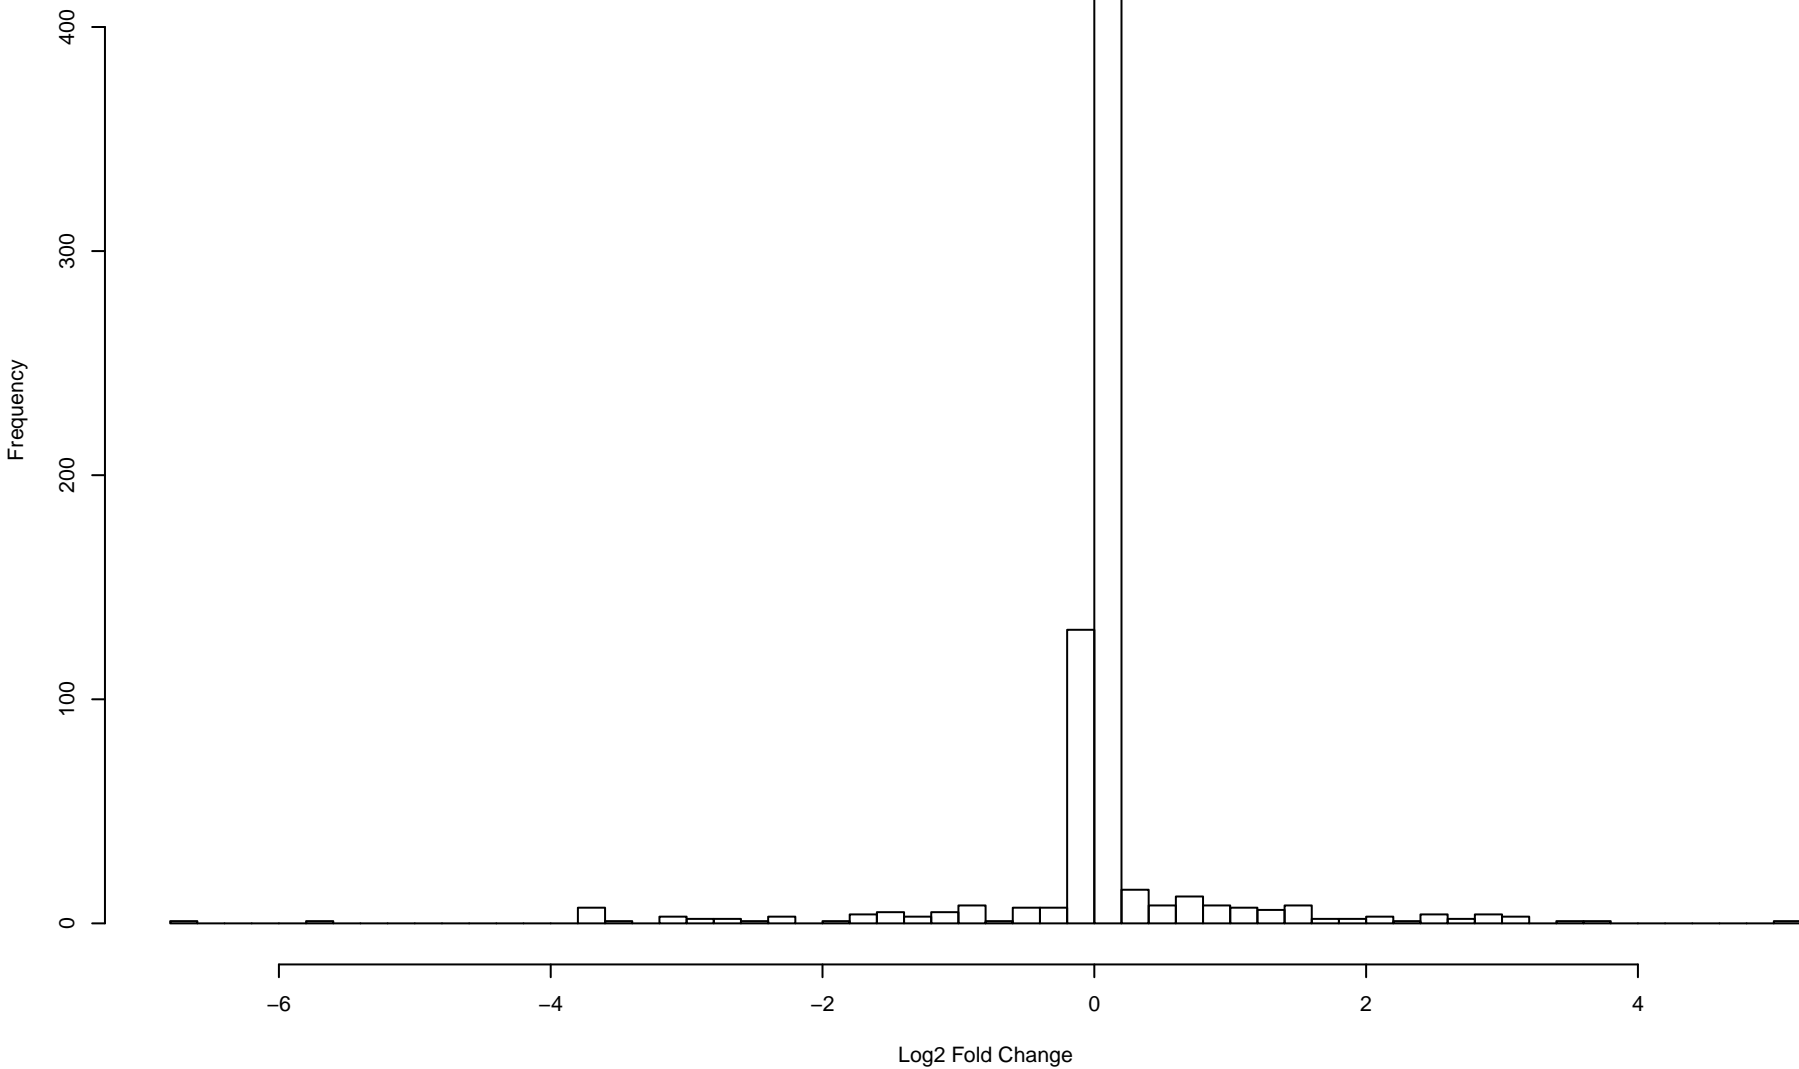

Log2 Fold Change Cat\_9/Cat\_10

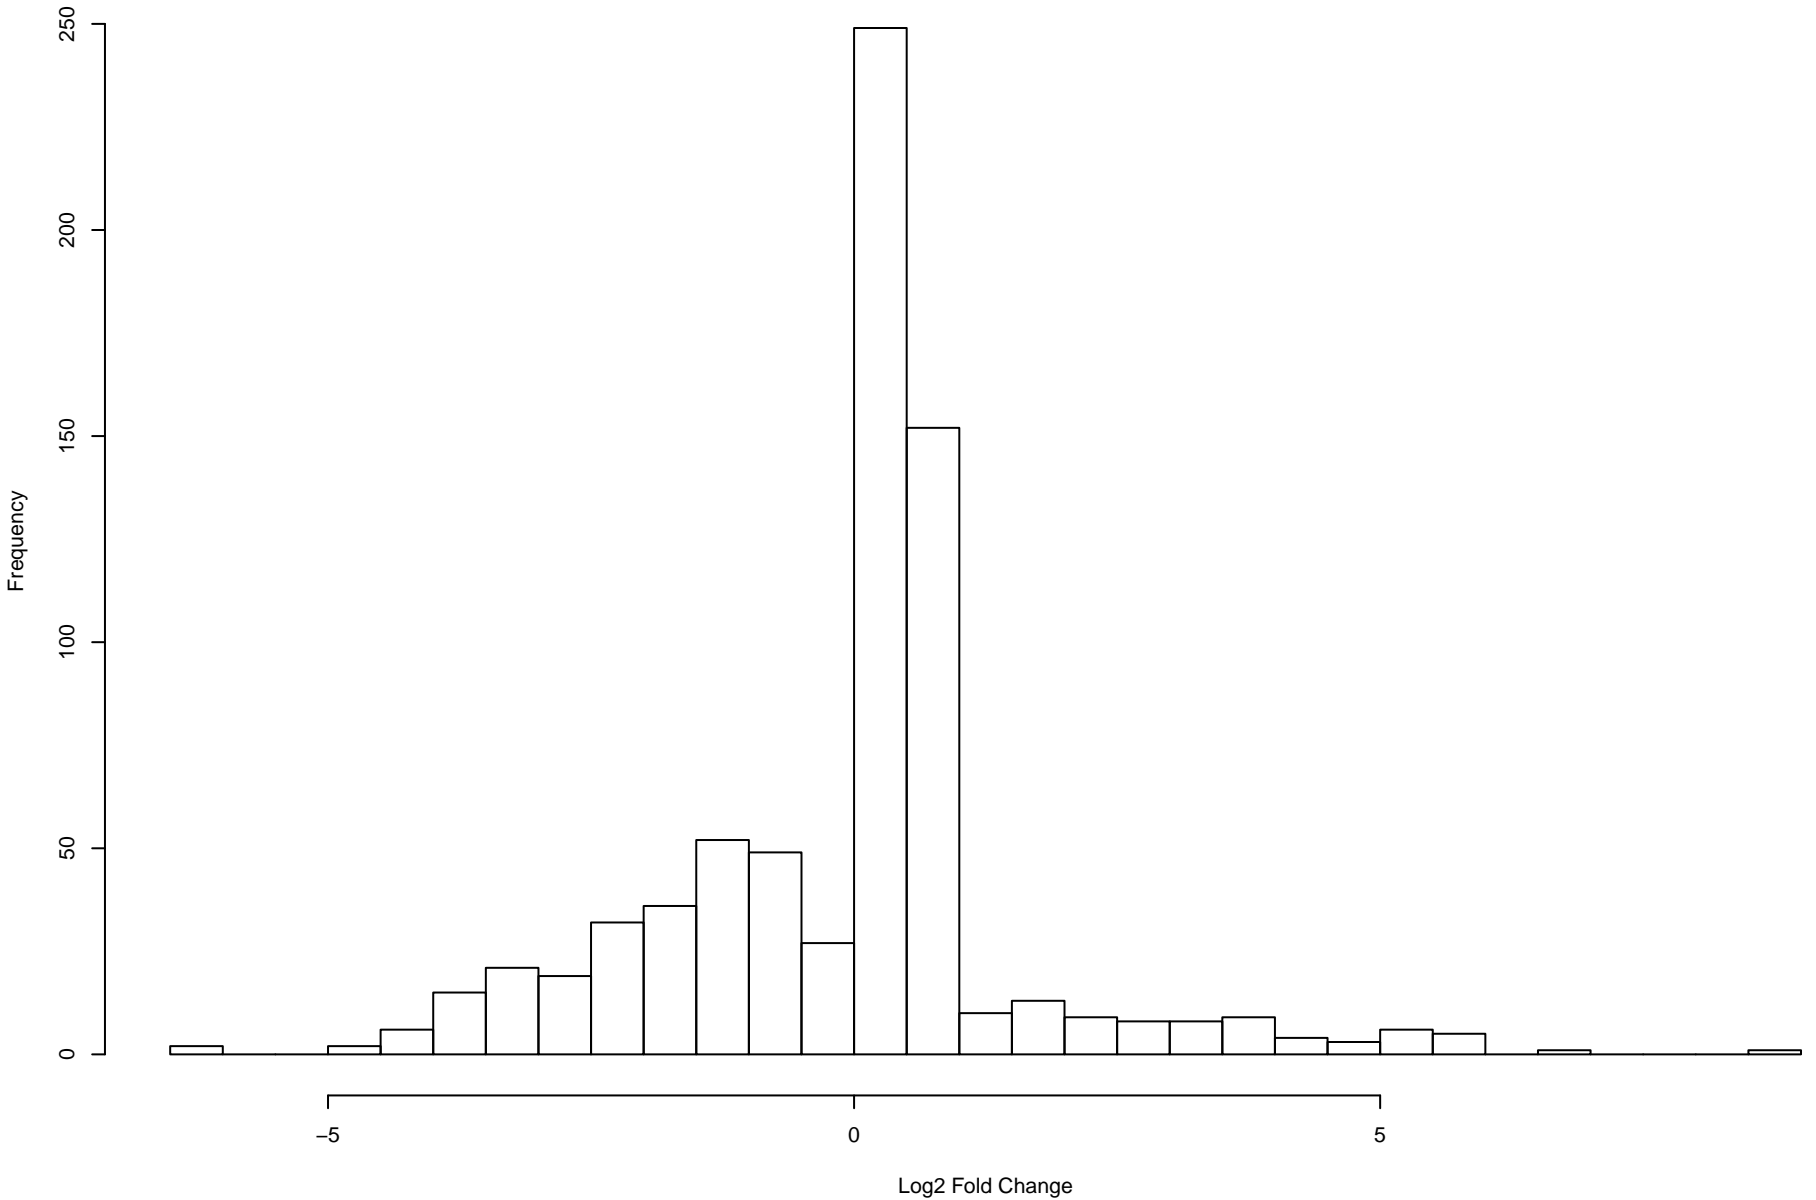

Supplement: supp [file elife-75798-supp-v1.zip]
