# Supplementary material for: Inhibiting host-protein deposition on urinary catheters reduces associated urinary tract infections
Source: eLife. 2022 Mar 29;11:e75798. doi: 10.7554/eLife.75798 (PMC8986317; doi:10.7554/eLife.75798)
Supplement: Figure 6—source data 1. — Individual data from all figures involving small datasets displayed in individual tabs of this source file. This includes Figures 1B and 2A-F, Figure 3B, Figure 4, Figure 1—figure supplement 1 and Figure 2—figure supplement 1. [file elife-75798-fig6-data1.zip]

Archive with 326 entries (325 files):
- Flores_Data/
- __MACOSX/._Flores_Data
- Flores_Data/Plot_Generator.R
- __MACOSX/Flores_Data/._Plot_Generator.R
- Flores_Data/README.txt
- __MACOSX/Flores_Data/._README.txt
- Flores_Data/AF1_parameters_from_session_1577059609020.txt
- __MACOSX/Flores_Data/._AF1_parameters_from_session_1577059609020.txt
- Flores_Data/AF1_quant_venn3-data-2reps_AFCat1.txt
- __MACOSX/Flores_Data/._AF1_quant_venn3-data-2reps_AFCat1.txt
- Flores_Data/AF1_limma-graphs_AFCat1.pdf
- __MACOSX/Flores_Data/._AF1_limma-graphs_AFCat1.pdf
- Flores_Data/AF1_limma-contrasts-matrix_ProteinGroups.txt
- __MACOSX/Flores_Data/._AF1_limma-contrasts-matrix_ProteinGroups.txt
- Flores_Data/AF1_limma-design-matrix_ProteinGroups.txt
- __MACOSX/Flores_Data/._AF1_limma-design-matrix_ProteinGroups.txt
- Flores_Data/AF1_limma-blocking-variable_ProteinGroups.txt
- __MACOSX/Flores_Data/._AF1_limma-blocking-variable_ProteinGroups.txt
- Flores_Data/Plot_Generator.RData
- __MACOSX/Flores_Data/._Plot_Generator.RData
- Flores_Data/AF1_Cat_3.Cat_1-volcano_AFCat1.pdf
- __MACOSX/Flores_Data/._AF1_Cat_3.Cat_1-volcano_AFCat1.pdf
- Flores_Data/AF1_Cat_3.Cat_1-value-ordered-log-ratio_AFCat1.pdf
- __MACOSX/Flores_Data/._AF1_Cat_3.Cat_1-value-ordered-log-ratio_AFCat1.pdf
- Flores_Data/AF1_Cat_3.Cat_1-reproducibility_AFCat1.pdf
- __MACOSX/Flores_Data/._AF1_Cat_3.Cat_1-reproducibility_AFCat1.pdf
- Flores_Data/AF1_Cat_3.Cat_1-MA_AFCat1.pdf
- __MACOSX/Flores_Data/._AF1_Cat_3.Cat_1-MA_AFCat1.pdf
- Flores_Data/AF1_Cat_4.Cat_1-volcano_AFCat1.pdf
- __MACOSX/Flores_Data/._AF1_Cat_4.Cat_1-volcano_AFCat1.pdf
- Flores_Data/AF1_Cat_4.Cat_1-reproducibility_AFCat1.pdf
- __MACOSX/Flores_Data/._AF1_Cat_4.Cat_1-reproducibility_AFCat1.pdf
- Flores_Data/AF1_Cat_4.Cat_1-MA_AFCat1.pdf
- __MACOSX/Flores_Data/._AF1_Cat_4.Cat_1-MA_AFCat1.pdf
- Flores_Data/AF1_Cat_5.Cat_1-volcano_AFCat1.pdf
- __MACOSX/Flores_Data/._AF1_Cat_5.Cat_1-volcano_AFCat1.pdf
- Flores_Data/AF1_Cat_4.Cat_1-value-ordered-log-ratio_AFCat1.pdf
- __MACOSX/Flores_Data/._AF1_Cat_4.Cat_1-value-ordered-log-ratio_AFCat1.pdf
- Flores_Data/AF1_Cat_5.Cat_1-MA_AFCat1.pdf
- __MACOSX/Flores_Data/._AF1_Cat_5.Cat_1-MA_AFCat1.pdf
- Flores_Data/AF1_Cat_5.Cat_1-reproducibility_AFCat1.pdf
- __MACOSX/Flores_Data/._AF1_Cat_5.Cat_1-reproducibility_AFCat1.pdf
- Flores_Data/AF1_Cat_5.Cat_1-value-ordered-log-ratio_AFCat1.pdf
- __MACOSX/Flores_Data/._AF1_Cat_5.Cat_1-value-ordered-log-ratio_AFCat1.pdf
- Flores_Data/AF1_Cat_6.Cat_1-volcano_AFCat1.pdf
- __MACOSX/Flores_Data/._AF1_Cat_6.Cat_1-volcano_AFCat1.pdf
- Flores_Data/AF1_Cat_6.Cat_1-MA_AFCat1.pdf
- __MACOSX/Flores_Data/._AF1_Cat_6.Cat_1-MA_AFCat1.pdf
- Flores_Data/AF1_Cat_6.Cat_1-reproducibility_AFCat1.pdf
- __MACOSX/Flores_Data/._AF1_Cat_6.Cat_1-reproducibility_AFCat1.pdf
- Flores_Data/AF1_Cat_6.Cat_1-value-ordered-log-ratio_AFCat1.pdf
- __MACOSX/Flores_Data/._AF1_Cat_6.Cat_1-value-ordered-log-ratio_AFCat1.pdf
- Flores_Data/AF1_Cat_7.Cat_1-volcano_AFCat1.pdf
- __MACOSX/Flores_Data/._AF1_Cat_7.Cat_1-volcano_AFCat1.pdf
- Flores_Data/AF1_Cat_7.Cat_1-value-ordered-log-ratio_AFCat1.pdf
- __MACOSX/Flores_Data/._AF1_Cat_7.Cat_1-value-ordered-log-ratio_AFCat1.pdf
- Flores_Data/AF1_Cat_7.Cat_1-reproducibility_AFCat1.pdf
- __MACOSX/Flores_Data/._AF1_Cat_7.Cat_1-reproducibility_AFCat1.pdf
- Flores_Data/AF1_Cat_7.Cat_1-MA_AFCat1.pdf
- __MACOSX/Flores_Data/._AF1_Cat_7.Cat_1-MA_AFCat1.pdf
- Flores_Data/AF1_Cat_8.Cat_1-volcano_AFCat1.pdf
- __MACOSX/Flores_Data/._AF1_Cat_8.Cat_1-volcano_AFCat1.pdf
- Flores_Data/AF1_Cat_8.Cat_1-value-ordered-log-ratio_AFCat1.pdf
- __MACOSX/Flores_Data/._AF1_Cat_8.Cat_1-value-ordered-log-ratio_AFCat1.pdf
- Flores_Data/AF1_Cat_8.Cat_1-MA_AFCat1.pdf
- __MACOSX/Flores_Data/._AF1_Cat_8.Cat_1-MA_AFCat1.pdf
- Flores_Data/AF1_Cat_8.Cat_1-reproducibility_AFCat1.pdf
- __MACOSX/Flores_Data/._AF1_Cat_8.Cat_1-reproducibility_AFCat1.pdf
- Flores_Data/AF1_Cat_10.Cat_1-volcano_AFCat1.pdf
- __MACOSX/Flores_Data/._AF1_Cat_10.Cat_1-volcano_AFCat1.pdf
- Flores_Data/AF1_Cat_10.Cat_1-value-ordered-log-ratio_AFCat1.pdf
- __MACOSX/Flores_Data/._AF1_Cat_10.Cat_1-value-ordered-log-ratio_AFCat1.pdf
- Flores_Data/AF1_Cat_10.Cat_1-MA_AFCat1.pdf
- __MACOSX/Flores_Data/._AF1_Cat_10.Cat_1-MA_AFCat1.pdf
- Flores_Data/AF1_Cat_10.Cat_1-reproducibility_AFCat1.pdf
- __MACOSX/Flores_Data/._AF1_Cat_10.Cat_1-reproducibility_AFCat1.pdf
- Flores_Data/AF1_Cat_9.Cat_1-volcano_AFCat1.pdf
- __MACOSX/Flores_Data/._AF1_Cat_9.Cat_1-volcano_AFCat1.pdf
- Flores_Data/AF1_Cat_9.Cat_1-value-ordered-log-ratio_AFCat1.pdf
- __MACOSX/Flores_Data/._AF1_Cat_9.Cat_1-value-ordered-log-ratio_AFCat1.pdf
- Flores_Data/AF1_Cat_4.Cat_3-volcano_AFCat1.pdf
- __MACOSX/Flores_Data/._AF1_Cat_4.Cat_3-volcano_AFCat1.pdf
- Flores_Data/AF1_Cat_9.Cat_1-MA_AFCat1.pdf
- __MACOSX/Flores_Data/._AF1_Cat_9.Cat_1-MA_AFCat1.pdf
- Flores_Data/AF1_Cat_9.Cat_1-reproducibility_AFCat1.pdf
- __MACOSX/Flores_Data/._AF1_Cat_9.Cat_1-reproducibility_AFCat1.pdf
- Flores_Data/AF1_Cat_4.Cat_3-value-ordered-log-ratio_AFCat1.pdf
- __MACOSX/Flores_Data/._AF1_Cat_4.Cat_3-value-ordered-log-ratio_AFCat1.pdf
- Flores_Data/AF1_Cat_4.Cat_3-reproducibility_AFCat1.pdf
- __MACOSX/Flores_Data/._AF1_Cat_4.Cat_3-reproducibility_AFCat1.pdf
- Flores_Data/AF1_Cat_4.Cat_3-MA_AFCat1.pdf
- __MACOSX/Flores_Data/._AF1_Cat_4.Cat_3-MA_AFCat1.pdf
- Flores_Data/AF1_Cat_5.Cat_3-volcano_AFCat1.pdf
- __MACOSX/Flores_Data/._AF1_Cat_5.Cat_3-volcano_AFCat1.pdf
- Flores_Data/AF1_Cat_5.Cat_3-value-ordered-log-ratio_AFCat1.pdf
- __MACOSX/Flores_Data/._AF1_Cat_5.Cat_3-value-ordered-log-ratio_AFCat1.pdf
- Flores_Data/AF1_Cat_6.Cat_3-volcano_AFCat1.pdf
- __MACOSX/Flores_Data/._AF1_Cat_6.Cat_3-volcano_AFCat1.pdf
- Flores_Data/AF1_Cat_5.Cat_3-reproducibility_AFCat1.pdf
- __MACOSX/Flores_Data/._AF1_Cat_5.Cat_3-reproducibility_AFCat1.pdf
- Flores_Data/AF1_Cat_5.Cat_3-MA_AFCat1.pdf
- __MACOSX/Flores_Data/._AF1_Cat_5.Cat_3-MA_AFCat1.pdf
- Flores_Data/AF1_Cat_6.Cat_3-value-ordered-log-ratio_AFCat1.pdf
- __MACOSX/Flores_Data/._AF1_Cat_6.Cat_3-value-ordered-log-ratio_AFCat1.pdf
- Flores_Data/AF1_Cat_6.Cat_3-reproducibility_AFCat1.pdf
- __MACOSX/Flores_Data/._AF1_Cat_6.Cat_3-reproducibility_AFCat1.pdf
- Flores_Data/AF1_Cat_6.Cat_3-MA_AFCat1.pdf
- __MACOSX/Flores_Data/._AF1_Cat_6.Cat_3-MA_AFCat1.pdf
- Flores_Data/AF1_Cat_7.Cat_3-volcano_AFCat1.pdf
- __MACOSX/Flores_Data/._AF1_Cat_7.Cat_3-volcano_AFCat1.pdf
- Flores_Data/AF1_Cat_7.Cat_3-value-ordered-log-ratio_AFCat1.pdf
- __MACOSX/Flores_Data/._AF1_Cat_7.Cat_3-value-ordered-log-ratio_AFCat1.pdf
- Flores_Data/AF1_Cat_7.Cat_3-MA_AFCat1.pdf
- __MACOSX/Flores_Data/._AF1_Cat_7.Cat_3-MA_AFCat1.pdf
- Flores_Data/AF1_Cat_7.Cat_3-reproducibility_AFCat1.pdf
- __MACOSX/Flores_Data/._AF1_Cat_7.Cat_3-reproducibility_AFCat1.pdf
- Flores_Data/AF1_Cat_8.Cat_3-volcano_AFCat1.pdf
- __MACOSX/Flores_Data/._AF1_Cat_8.Cat_3-volcano_AFCat1.pdf
- Flores_Data/AF1_Cat_8.Cat_3-value-ordered-log-ratio_AFCat1.pdf
- __MACOSX/Flores_Data/._AF1_Cat_8.Cat_3-value-ordered-log-ratio_AFCat1.pdf
- Flores_Data/AF1_Cat_8.Cat_3-reproducibility_AFCat1.pdf
- __MACOSX/Flores_Data/._AF1_Cat_8.Cat_3-reproducibility_AFCat1.pdf
- Flores_Data/AF1_Cat_8.Cat_3-MA_AFCat1.pdf
- __MACOSX/Flores_Data/._AF1_Cat_8.Cat_3-MA_AFCat1.pdf
- Flores_Data/AF1_Cat_10.Cat_3-volcano_AFCat1.pdf
- __MACOSX/Flores_Data/._AF1_Cat_10.Cat_3-volcano_AFCat1.pdf
- Flores_Data/AF1_Cat_10.Cat_3-value-ordered-log-ratio_AFCat1.pdf
- __MACOSX/Flores_Data/._AF1_Cat_10.Cat_3-value-ordered-log-ratio_AFCat1.pdf
- Flores_Data/AF1_Cat_10.Cat_3-reproducibility_AFCat1.pdf
- __MACOSX/Flores_Data/._AF1_Cat_10.Cat_3-reproducibility_AFCat1.pdf
- Flores_Data/AF1_Cat_10.Cat_3-MA_AFCat1.pdf
- __MACOSX/Flores_Data/._AF1_Cat_10.Cat_3-MA_AFCat1.pdf
- Flores_Data/AF1_Cat_9.Cat_3-volcano_AFCat1.pdf
- __MACOSX/Flores_Data/._AF1_Cat_9.Cat_3-volcano_AFCat1.pdf
- Flores_Data/AF1_Cat_9.Cat_3-value-ordered-log-ratio_AFCat1.pdf
- __MACOSX/Flores_Data/._AF1_Cat_9.Cat_3-value-ordered-log-ratio_AFCat1.pdf
- Flores_Data/AF1_Cat_9.Cat_3-MA_AFCat1.pdf
- __MACOSX/Flores_Data/._AF1_Cat_9.Cat_3-MA_AFCat1.pdf
- Flores_Data/AF1_Cat_5.Cat_4-volcano_AFCat1.pdf
- __MACOSX/Flores_Data/._AF1_Cat_5.Cat_4-volcano_AFCat1.pdf
- Flores_Data/AF1_Cat_9.Cat_3-reproducibility_AFCat1.pdf
- __MACOSX/Flores_Data/._AF1_Cat_9.Cat_3-reproducibility_AFCat1.pdf
- Flores_Data/AF1_Cat_5.Cat_4-value-ordered-log-ratio_AFCat1.pdf
- __MACOSX/Flores_Data/._AF1_Cat_5.Cat_4-value-ordered-log-ratio_AFCat1.pdf
- Flores_Data/AF1_Cat_5.Cat_4-MA_AFCat1.pdf
- __MACOSX/Flores_Data/._AF1_Cat_5.Cat_4-MA_AFCat1.pdf
- Flores_Data/AF1_Cat_6.Cat_4-volcano_AFCat1.pdf
- __MACOSX/Flores_Data/._AF1_Cat_6.Cat_4-volcano_AFCat1.pdf
- Flores_Data/AF1_Cat_5.Cat_4-reproducibility_AFCat1.pdf
- __MACOSX/Flores_Data/._AF1_Cat_5.Cat_4-reproducibility_AFCat1.pdf
- Flores_Data/AF1_Cat_6.Cat_4-value-ordered-log-ratio_AFCat1.pdf
- __MACOSX/Flores_Data/._AF1_Cat_6.Cat_4-value-ordered-log-ratio_AFCat1.pdf
- Flores_Data/AF1_Cat_7.Cat_4-volcano_AFCat1.pdf
- __MACOSX/Flores_Data/._AF1_Cat_7.Cat_4-volcano_AFCat1.pdf
- Flores_Data/AF1_Cat_6.Cat_4-reproducibility_AFCat1.pdf
- __MACOSX/Flores_Data/._AF1_Cat_6.Cat_4-reproducibility_AFCat1.pdf
- Flores_Data/AF1_Cat_6.Cat_4-MA_AFCat1.pdf
- __MACOSX/Flores_Data/._AF1_Cat_6.Cat_4-MA_AFCat1.pdf
- Flores_Data/AF1_Cat_7.Cat_4-value-ordered-log-ratio_AFCat1.pdf
- __MACOSX/Flores_Data/._AF1_Cat_7.Cat_4-value-ordered-log-ratio_AFCat1.pdf
- Flores_Data/AF1_Cat_7.Cat_4-MA_AFCat1.pdf
- __MACOSX/Flores_Data/._AF1_Cat_7.Cat_4-MA_AFCat1.pdf
- Flores_Data/AF1_Cat_8.Cat_4-volcano_AFCat1.pdf
- __MACOSX/Flores_Data/._AF1_Cat_8.Cat_4-volcano_AFCat1.pdf
- Flores_Data/AF1_Cat_7.Cat_4-reproducibility_AFCat1.pdf
- __MACOSX/Flores_Data/._AF1_Cat_7.Cat_4-reproducibility_AFCat1.pdf
- Flores_Data/AF1_Cat_8.Cat_4-reproducibility_AFCat1.pdf
- __MACOSX/Flores_Data/._AF1_Cat_8.Cat_4-reproducibility_AFCat1.pdf
- Flores_Data/AF1_Cat_8.Cat_4-MA_AFCat1.pdf
- __MACOSX/Flores_Data/._AF1_Cat_8.Cat_4-MA_AFCat1.pdf
- Flores_Data/AF1_Cat_10.Cat_4-volcano_AFCat1.pdf
- __MACOSX/Flores_Data/._AF1_Cat_10.Cat_4-volcano_AFCat1.pdf
- Flores_Data/AF1_Cat_8.Cat_4-value-ordered-log-ratio_AFCat1.pdf
- __MACOSX/Flores_Data/._AF1_Cat_8.Cat_4-value-ordered-log-ratio_AFCat1.pdf
- Flores_Data/AF1_Cat_10.Cat_4-MA_AFCat1.pdf
- __MACOSX/Flores_Data/._AF1_Cat_10.Cat_4-MA_AFCat1.pdf
- Flores_Data/AF1_Cat_9.Cat_4-volcano_AFCat1.pdf
- __MACOSX/Flores_Data/._AF1_Cat_9.Cat_4-volcano_AFCat1.pdf
- Flores_Data/AF1_Cat_10.Cat_4-reproducibility_AFCat1.pdf
- __MACOSX/Flores_Data/._AF1_Cat_10.Cat_4-reproducibility_AFCat1.pdf
- Flores_Data/AF1_Cat_10.Cat_4-value-ordered-log-ratio_AFCat1.pdf
- __MACOSX/Flores_Data/._AF1_Cat_10.Cat_4-value-ordered-log-ratio_AFCat1.pdf
- Flores_Data/AF1_Cat_9.Cat_4-MA_AFCat1.pdf
- __MACOSX/Flores_Data/._AF1_Cat_9.Cat_4-MA_AFCat1.pdf
- Flores_Data/AF1_Cat_9.Cat_4-reproducibility_AFCat1.pdf
- __MACOSX/Flores_Data/._AF1_Cat_9.Cat_4-reproducibility_AFCat1.pdf
- Flores_Data/AF1_Cat_9.Cat_4-value-ordered-log-ratio_AFCat1.pdf
- __MACOSX/Flores_Data/._AF1_Cat_9.Cat_4-value-ordered-log-ratio_AFCat1.pdf
- Flores_Data/AF1_Cat_6.Cat_5-volcano_AFCat1.pdf
- __MACOSX/Flores_Data/._AF1_Cat_6.Cat_5-volcano_AFCat1.pdf
- Flores_Data/AF1_Cat_6.Cat_5-value-ordered-log-ratio_AFCat1.pdf
- __MACOSX/Flores_Data/._AF1_Cat_6.Cat_5-value-ordered-log-ratio_AFCat1.pdf
- Flores_Data/AF1_Cat_7.Cat_5-volcano_AFCat1.pdf
- __MACOSX/Flores_Data/._AF1_Cat_7.Cat_5-volcano_AFCat1.pdf
- Flores_Data/AF1_Cat_6.Cat_5-MA_AFCat1.pdf
- __MACOSX/Flores_Data/._AF1_Cat_6.Cat_5-MA_AFCat1.pdf
- Flores_Data/AF1_Cat_6.Cat_5-reproducibility_AFCat1.pdf
- __MACOSX/Flores_Data/._AF1_Cat_6.Cat_5-reproducibility_AFCat1.pdf
- Flores_Data/AF1_Cat_7.Cat_5-MA_AFCat1.pdf
- __MACOSX/Flores_Data/._AF1_Cat_7.Cat_5-MA_AFCat1.pdf
- Flores_Data/AF1_Cat_7.Cat_5-value-ordered-log-ratio_AFCat1.pdf
- __MACOSX/Flores_Data/._AF1_Cat_7.Cat_5-value-ordered-log-ratio_AFCat1.pdf
- Flores_Data/AF1_Cat_7.Cat_5-reproducibility_AFCat1.pdf
- __MACOSX/Flores_Data/._AF1_Cat_7.Cat_5-reproducibility_AFCat1.pdf
- Flores_Data/AF1_Cat_8.Cat_5-volcano_AFCat1.pdf
- __MACOSX/Flores_Data/._AF1_Cat_8.Cat_5-volcano_AFCat1.pdf
- Flores_Data/AF1_Cat_8.Cat_5-reproducibility_AFCat1.pdf
- __MACOSX/Flores_Data/._AF1_Cat_8.Cat_5-reproducibility_AFCat1.pdf
- Flores_Data/AF1_Cat_8.Cat_5-value-ordered-log-ratio_AFCat1.pdf
- __MACOSX/Flores_Data/._AF1_Cat_8.Cat_5-value-ordered-log-ratio_AFCat1.pdf
- Flores_Data/AF1_Cat_8.Cat_5-MA_AFCat1.pdf
- __MACOSX/Flores_Data/._AF1_Cat_8.Cat_5-MA_AFCat1.pdf
- Flores_Data/AF1_Cat_10.Cat_5-volcano_AFCat1.pdf
- __MACOSX/Flores_Data/._AF1_Cat_10.Cat_5-volcano_AFCat1.pdf
- Flores_Data/AF1_Cat_10.Cat_5-reproducibility_AFCat1.pdf
- __MACOSX/Flores_Data/._AF1_Cat_10.Cat_5-reproducibility_AFCat1.pdf
- Flores_Data/AF1_Cat_10.Cat_5-value-ordered-log-ratio_AFCat1.pdf
- __MACOSX/Flores_Data/._AF1_Cat_10.Cat_5-value-ordered-log-ratio_AFCat1.pdf
- Flores_Data/AF1_Cat_10.Cat_5-MA_AFCat1.pdf
- __MACOSX/Flores_Data/._AF1_Cat_10.Cat_5-MA_AFCat1.pdf
- Flores_Data/AF1_Cat_9.Cat_5-volcano_AFCat1.pdf
- __MACOSX/Flores_Data/._AF1_Cat_9.Cat_5-volcano_AFCat1.pdf
- Flores_Data/AF1_Cat_9.Cat_5-reproducibility_AFCat1.pdf
- __MACOSX/Flores_Data/._AF1_Cat_9.Cat_5-reproducibility_AFCat1.pdf
- Flores_Data/AF1_Cat_9.Cat_5-value-ordered-log-ratio_AFCat1.pdf
- __MACOSX/Flores_Data/._AF1_Cat_9.Cat_5-value-ordered-log-ratio_AFCat1.pdf
- Flores_Data/AF1_Cat_9.Cat_5-MA_AFCat1.pdf
- __MACOSX/Flores_Data/._AF1_Cat_9.Cat_5-MA_AFCat1.pdf
- Flores_Data/AF1_Cat_7.Cat_6-volcano_AFCat1.pdf
- __MACOSX/Flores_Data/._AF1_Cat_7.Cat_6-volcano_AFCat1.pdf
- Flores_Data/AF1_Cat_7.Cat_6-MA_AFCat1.pdf
- __MACOSX/Flores_Data/._AF1_Cat_7.Cat_6-MA_AFCat1.pdf
- Flores_Data/AF1_Cat_7.Cat_6-value-ordered-log-ratio_AFCat1.pdf
- __MACOSX/Flores_Data/._AF1_Cat_7.Cat_6-value-ordered-log-ratio_AFCat1.pdf
- Flores_Data/AF1_Cat_8.Cat_6-volcano_AFCat1.pdf
- __MACOSX/Flores_Data/._AF1_Cat_8.Cat_6-volcano_AFCat1.pdf
- Flores_Data/AF1_Cat_7.Cat_6-reproducibility_AFCat1.pdf
- __MACOSX/Flores_Data/._AF1_Cat_7.Cat_6-reproducibility_AFCat1.pdf
- Flores_Data/AF1_Cat_8.Cat_6-MA_AFCat1.pdf
- __MACOSX/Flores_Data/._AF1_Cat_8.Cat_6-MA_AFCat1.pdf
- Flores_Data/AF1_Cat_8.Cat_6-value-ordered-log-ratio_AFCat1.pdf
- __MACOSX/Flores_Data/._AF1_Cat_8.Cat_6-value-ordered-log-ratio_AFCat1.pdf
- Flores_Data/AF1_Cat_8.Cat_6-reproducibility_AFCat1.pdf
- __MACOSX/Flores_Data/._AF1_Cat_8.Cat_6-reproducibility_AFCat1.pdf
- Flores_Data/AF1_Cat_10.Cat_6-volcano_AFCat1.pdf
- __MACOSX/Flores_Data/._AF1_Cat_10.Cat_6-volcano_AFCat1.pdf
- Flores_Data/AF1_Cat_10.Cat_6-value-ordered-log-ratio_AFCat1.pdf
- __MACOSX/Flores_Data/._AF1_Cat_10.Cat_6-value-ordered-log-ratio_AFCat1.pdf
- Flores_Data/AF1_Cat_10.Cat_6-reproducibility_AFCat1.pdf
- __MACOSX/Flores_Data/._AF1_Cat_10.Cat_6-reproducibility_AFCat1.pdf
- Flores_Data/AF1_Cat_9.Cat_6-volcano_AFCat1.pdf
- __MACOSX/Flores_Data/._AF1_Cat_9.Cat_6-volcano_AFCat1.pdf
- Flores_Data/AF1_Cat_10.Cat_6-MA_AFCat1.pdf
- __MACOSX/Flores_Data/._AF1_Cat_10.Cat_6-MA_AFCat1.pdf
- Flores_Data/AF1_Cat_9.Cat_6-value-ordered-log-ratio_AFCat1.pdf
- __MACOSX/Flores_Data/._AF1_Cat_9.Cat_6-value-ordered-log-ratio_AFCat1.pdf
- Flores_Data/AF1_Cat_9.Cat_6-reproducibility_AFCat1.pdf
- __MACOSX/Flores_Data/._AF1_Cat_9.Cat_6-reproducibility_AFCat1.pdf
- Flores_Data/AF1_Cat_9.Cat_6-MA_AFCat1.pdf
- __MACOSX/Flores_Data/._AF1_Cat_9.Cat_6-MA_AFCat1.pdf
- Flores_Data/AF1_Cat_8.Cat_7-volcano_AFCat1.pdf
- __MACOSX/Flores_Data/._AF1_Cat_8.Cat_7-volcano_AFCat1.pdf
- Flores_Data/AF1_Cat_8.Cat_7-value-ordered-log-ratio_AFCat1.pdf
- __MACOSX/Flores_Data/._AF1_Cat_8.Cat_7-value-ordered-log-ratio_AFCat1.pdf
- Flores_Data/AF1_Cat_8.Cat_7-MA_AFCat1.pdf
- __MACOSX/Flores_Data/._AF1_Cat_8.Cat_7-MA_AFCat1.pdf
- Flores_Data/AF1_Cat_8.Cat_7-reproducibility_AFCat1.pdf
- __MACOSX/Flores_Data/._AF1_Cat_8.Cat_7-reproducibility_AFCat1.pdf
- Flores_Data/AF1_Cat_10.Cat_7-volcano_AFCat1.pdf
- __MACOSX/Flores_Data/._AF1_Cat_10.Cat_7-volcano_AFCat1.pdf
- Flores_Data/AF1_Cat_10.Cat_7-value-ordered-log-ratio_AFCat1.pdf
- __MACOSX/Flores_Data/._AF1_Cat_10.Cat_7-value-ordered-log-ratio_AFCat1.pdf
- Flores_Data/AF1_Cat_10.Cat_7-MA_AFCat1.pdf
- __MACOSX/Flores_Data/._AF1_Cat_10.Cat_7-MA_AFCat1.pdf
- Flores_Data/AF1_Cat_10.Cat_7-reproducibility_AFCat1.pdf
- __MACOSX/Flores_Data/._AF1_Cat_10.Cat_7-reproducibility_AFCat1.pdf
- Flores_Data/AF1_Cat_9.Cat_7-volcano_AFCat1.pdf
- __MACOSX/Flores_Data/._AF1_Cat_9.Cat_7-volcano_AFCat1.pdf
- Flores_Data/AF1_Cat_9.Cat_7-value-ordered-log-ratio_AFCat1.pdf
- __MACOSX/Flores_Data/._AF1_Cat_9.Cat_7-value-ordered-log-ratio_AFCat1.pdf
- Flores_Data/AF1_Cat_9.Cat_7-MA_AFCat1.pdf
- __MACOSX/Flores_Data/._AF1_Cat_9.Cat_7-MA_AFCat1.pdf
- Flores_Data/AF1_Cat_9.Cat_7-reproducibility_AFCat1.pdf
- __MACOSX/Flores_Data/._AF1_Cat_9.Cat_7-reproducibility_AFCat1.pdf
- Flores_Data/AF1_Cat_10.Cat_8-volcano_AFCat1.pdf
- __MACOSX/Flores_Data/._AF1_Cat_10.Cat_8-volcano_AFCat1.pdf
- Flores_Data/AF1_Cat_10.Cat_8-value-ordered-log-ratio_AFCat1.pdf
- __MACOSX/Flores_Data/._AF1_Cat_10.Cat_8-value-ordered-log-ratio_AFCat1.pdf
- Flores_Data/AF1_Cat_10.Cat_8-MA_AFCat1.pdf
- __MACOSX/Flores_Data/._AF1_Cat_10.Cat_8-MA_AFCat1.pdf
- Flores_Data/AF1_Cat_10.Cat_8-reproducibility_AFCat1.pdf
- __MACOSX/Flores_Data/._AF1_Cat_10.Cat_8-reproducibility_AFCat1.pdf
- Flores_Data/AF1_Cat_9.Cat_8-volcano_AFCat1.pdf
- __MACOSX/Flores_Data/._AF1_Cat_9.Cat_8-volcano_AFCat1.pdf
- Flores_Data/AF1_Cat_9.Cat_8-value-ordered-log-ratio_AFCat1.pdf
- __MACOSX/Flores_Data/._AF1_Cat_9.Cat_8-value-ordered-log-ratio_AFCat1.pdf
- Flores_Data/AF1_Cat_9.Cat_10-volcano_AFCat1.pdf
- __MACOSX/Flores_Data/._AF1_Cat_9.Cat_10-volcano_AFCat1.pdf
- Flores_Data/AF1_Cat_9.Cat_8-MA_AFCat1.pdf
- __MACOSX/Flores_Data/._AF1_Cat_9.Cat_8-MA_AFCat1.pdf
[truncated: 26 more entries]
