# Supplementary material for: Inhibiting host-protein deposition on urinary catheters reduces associated urinary tract infections
Source: eLife. 2022 Mar 29;11:e75798. doi: 10.7554/eLife.75798 (PMC8986317; doi:10.7554/eLife.75798)
Supplement: Figure 6—source data 1. — Individual data from all figures involving small datasets displayed in individual tabs of this source file. This includes Figures 1B and 2A-F, Figure 3B, Figure 4, Figure 1—figure supplement 1 and Figure 2—figure supplement 1. [file elife-75798-fig6-data1.zip › 06172019_AFlor_Blad_2_A123_R1__FDR.xlsx]

## Sheet: Metadata
_RESULTS_version	5
RESULTS_SEARCH_STAT_search_begin_time_clock	2019-06-19 13:41:42
RESULTS_SEARCH_STAT_search_end_time_clock	2019-06-19 14:20:39
RESULTS_SEARCH_STAT_search_time_duration	8299-10-15
RESULTS_SEARCH_STAT_stage_signal_processing_begin_time_clock	2019-06-19 13:41:42
RESULTS_SEARCH_STAT_stage_signal_processing_end_time_clock	2019-06-19 13:43:37
RESULTS_SEARCH_STAT_stage_signal_processing_time_duration	2215-09-18
RESULTS_SEARCH_STAT_stage_waiting_begin_time_clock	2019-06-19 13:43:37
RESULTS_SEARCH_STAT_stage_waiting_end_time_clock	2019-06-19 13:43:38
RESULTS_SEARCH_STAT_stage_waiting_time_duration	1901-08-13
RESULTS_SEARCH_STAT_stage_searching_begin_time_clock	2019-06-19 13:43:38
RESULTS_SEARCH_STAT_stage_searching_end_time_clock	2019-06-19 14:19:09
RESULTS_SEARCH_STAT_stage_searching_time_duration	7733-01-25
RESULTS_SEARCH_STAT_stage_fdr_begin_time_clock	2019-06-19 14:19:09
RESULTS_SEARCH_STAT_stage_fdr_end_time_clock	2019-06-19 14:20:39
RESULTS_SEARCH_STAT_stage_fdr_time_duration	2146-12-26
RESULTS_SEARCH_STAT_task_fraglet_exe_begin_time_clock	2019-06-19 13:43:38
RESULTS_SEARCH_STAT_task_fraglet_exe_end_time_clock	2019-06-19 13:59:38
RESULTS_SEARCH_STAT_task_fraglet_exe_time_duration	960474
RESULTS_SEARCH_STAT_task_fraglet_exe_time_cpu	7023-01-18
RESULTS_SEARCH_STAT_task_progroup_begin_time_clock	2019-06-19 13:59:38
RESULTS_SEARCH_STAT_task_progroup_end_time_clock	2019-06-19 14:19:08
RESULTS_SEARCH_STAT_task_progroup_time_duration	1170271
RESULTS_SEARCH_STAT_task_progroup_time_cpu	5340-05-06
RESULTS_SEARCH_STAT_computer_memory	1933-08-19
RESULTS_SEARCH_STAT_computer_name	ESC308585
RESULTS_SEARCH_STAT_num_proteins	110708
RESULTS_SEARCH_STAT_num_residues	00:00:00
RESULTS_SEARCH_STAT_number_cores	1900-01-08
RESULTS_SEARCH_STAT_number_licensed_tasks	1900-01-02
RESULTS_SEARCH_STAT_number_processors	8
RESULTS_SEARCH_STAT_os	Windows 7 Ultimate (6.1.7600)
RESULTS_SEARCH_1_time_cpu	73953
RESULTS_SEARCH_1_time_duration	74306
RESULTS_SEARCH_1_version	5.0.2.5174
RESULTS_SEARCH_1_xml:id	SEARCH:1:636965485021443360_0
RESULTS_SEARCH_1_PARAMETERS_chemical_data_edited	FALSE
RESULTS_SEARCH_1_PARAMETERS_do_multiprecursor_search	TRUE
RESULTS_SEARCH_1_PARAMETERS_do_reverse_search	TRUE
RESULTS_SEARCH_1_PARAMETERS_max_quant_labels	35
RESULTS_SEARCH_1_PARAMETERS_maxresults	15
RESULTS_SEARCH_1_PARAMETERS_separate_searches	FALSE
RESULTS_SEARCH_1_PARAMETERS_MSTOLERANCE_type	dalton
RESULTS_SEARCH_1_PARAMETERS_MSTOLERANCE_value	0.05
RESULTS_SEARCH_1_PARAMETERS_MSMSTOLERANCE_type	dalton
RESULTS_SEARCH_1_PARAMETERS_MSMSTOLERANCE_value	0.1
RESULTS_SEARCH_1_PARAMETERS_MS_STANDARD_DEVIATION_type	dalton
RESULTS_SEARCH_1_PARAMETERS_MS_STANDARD_DEVIATION_value	0.0025
RESULTS_SEARCH_1_PARAMETERS_MSMS_STANDARD_DEVIATION_type	dalton
RESULTS_SEARCH_1_PARAMETERS_MSMS_STANDARD_DEVIATION_value	0.004
RESULTS_SEARCH_1_PARAMETERS_FASTA_filename	C:\AB SCIEX\ProteinPilot Data\SearchDatabases\2019_UP_Mouse_Con.fasta
RESULTS_SEARCH_1_PARAMETERS_AUTO_CALIBRATION_ms	TRUE
RESULTS_SEARCH_1_PARAMETERS_AUTO_CALIBRATION_msexport	FALSE
RESULTS_SEARCH_1_PARAMETERS_AUTO_CALIBRATION_msms	TRUE
RESULTS_SEARCH_1_PARAMETERS_AUTO_CALIBRATION_msmstolsdratio	3
RESULTS_SEARCH_1_PARAMETERS_AUTO_CALIBRATION_mstolsdratio	11
RESULTS_SEARCH_1_PARAMETERS_AUTO_CALIBRATION_squareroot	FALSE
RESULTS_SEARCH_1_PARAMETERS_AUTO_CALIBRATION_type	dalton
RESULTS_SEARCH_1_PARAMETERS_AUTO_CALIBRATION_MCP_d_s_s_f	0.0666667
RESULTS_SEARCH_1_PARAMETERS_AUTO_CALIBRATION_MCP_d_s_w_f	3
RESULTS_SEARCH_1_PARAMETERS_AUTO_CALIBRATION_MCP_m_f_r_mbc	200
RESULTS_SEARCH_1_PARAMETERS_AUTO_CALIBRATION_MCP_m_m_c	10
RESULTS_SEARCH_1_PARAMETERS_AUTO_CALIBRATION_MCP_m_m_f_s	0.25
RESULTS_SEARCH_1_PARAMETERS_AUTO_CALIBRATION_MCP_m_m_p_f	0.33
RESULTS_SEARCH_1_PARAMETERS_AUTO_CALIBRATION_MCP_m_m_p_rms_f	1
RESULTS_SEARCH_1_PARAMETERS_AUTO_CALIBRATION_MCP_m_p_t_f	1
RESULTS_SEARCH_1_PARAMETERS_AUTO_CALIBRATION_MCP_m_r_h_n_b	15
RESULTS_SEARCH_1_PARAMETERS_AUTO_CALIBRATION_MCP_m_z_n_s	99
RESULTS_SEARCH_1_PARAMETERS_AUTO_CALIBRATION_MCP_m_z_s_mn_f_r	0.0666667
RESULTS_SEARCH_1_PARAMETERS_AUTO_CALIBRATION_MCP_m_z_s_mx_f_r	0.1
RESULTS_SEARCH_1_PARAMETERS_MS_AUTO_CALIBRATION_OUT_avres	8.58242e-13
RESULTS_SEARCH_1_PARAMETERS_MS_AUTO_CALIBRATION_OUT_c0	-0.000655222
RESULTS_SEARCH_1_PARAMETERS_MS_AUTO_CALIBRATION_OUT_c1minus1	-1.37301e-05
RESULTS_SEARCH_1_PARAMETERS_MS_AUTO_CALIBRATION_OUT_c2	0
RESULTS_SEARCH_1_PARAMETERS_MS_AUTO_CALIBRATION_OUT_file	1
RESULTS_SEARCH_1_PARAMETERS_MS_AUTO_CALIBRATION_OUT_partnumber	1
RESULTS_SEARCH_1_PARAMETERS_MS_AUTO_CALIBRATION_OUT_polyorder	1
RESULTS_SEARCH_1_PARAMETERS_MS_AUTO_CALIBRATION_OUT_sample	1
RESULTS_SEARCH_1_PARAMETERS_MS_AUTO_CALIBRATION_OUT_squareroot	FALSE
RESULTS_SEARCH_1_PARAMETERS_MSMS_AUTO_CALIBRATION_OUT_avres	8.3671e-11
RESULTS_SEARCH_1_PARAMETERS_MSMS_AUTO_CALIBRATION_OUT_c0	-0.000713735
RESULTS_SEARCH_1_PARAMETERS_MSMS_AUTO_CALIBRATION_OUT_c1minus1	-9.63798e-06
RESULTS_SEARCH_1_PARAMETERS_MSMS_AUTO_CALIBRATION_OUT_c2	0
RESULTS_SEARCH_1_PARAMETERS_MSMS_AUTO_CALIBRATION_OUT_file	1
RESULTS_SEARCH_1_PARAMETERS_MSMS_AUTO_CALIBRATION_OUT_partnumber	1
RESULTS_SEARCH_1_PARAMETERS_MSMS_AUTO_CALIBRATION_OUT_polyorder	1
RESULTS_SEARCH_1_PARAMETERS_MSMS_AUTO_CALIBRATION_OUT_sample	1
RESULTS_SEARCH_1_PARAMETERS_MSMS_AUTO_CALIBRATION_OUT_squareroot	FALSE
RESULTS_SEARCH_1_PARAMETERS_MAX_PRECURSORS_FRAGLET	5
RESULTS_SEARCH_1_PARAMETERS_MAX_PRECURSORS_TAGLET	1
RESULTS_SEARCH_1_PARAMETERS_PRECURSORS_DR_FRAGLET	10
RESULTS_SEARCH_1_PARAMETERS_PRECURSORS_DR_TAGLET	3
RESULTS_SEARCH_1_PARAMETERS_DEFAULT_CHARGE_STATE_1_charge	1
RESULTS_SEARCH_1_PARAMETERS_DEFAULT_CHARGE_STATE_1_probability	1
RESULTS_SEARCH_1_PARAMETERS_DEFAULT_CHARGE_STATE_2_charge	2
RESULTS_SEARCH_1_PARAMETERS_DEFAULT_CHARGE_STATE_2_probability	1
RESULTS_SEARCH_1_PARAMETERS_DEFAULT_CHARGE_STATE_3_charge	3
RESULTS_SEARCH_1_PARAMETERS_DEFAULT_CHARGE_STATE_3_probability	1
RESULTS_SEARCH_1_PARAMETERS_VERSION	5.0.2.0, 5346
RESULTS_SEARCH_1_PARAMETERS_PARAGON_VERSION	5.0.2.0, 5174
RESULTS_SEARCH_1_PARAMETERS_APPLICATION	ProteinPilot(tm) Software
RESULTS_SEARCH_1_PARAMETERS_PROGROUP_alternativedispositionmaximumfoldprobabilitydrop	100
RESULTS_SEARCH_1_PARAMETERS_PROGROUP_alternativedispositionmaximumfoldscoredrop	2
RESULTS_SEARCH_1_PARAMETERS_PROGROUP_autodiscordantpeptidethreshold	0.3
RESULTS_SEARCH_1_PARAMETERS_PROGROUP_bayesconfidencecalclulation	TRUE
RESULTS_SEARCH_1_PARAMETERS_PROGROUP_calibrateconfidence	TRUE
RESULTS_SEARCH_1_PARAMETERS_PROGROUP_compresspeptides	FALSE
RESULTS_SEARCH_1_PARAMETERS_PROGROUP_confidencepercentthresholdforexcludingothersfromquant	15
RESULTS_SEARCH_1_PARAMETERS_PROGROUP_confidencepercentthresholdforincludingselfinquant	15
RESULTS_SEARCH_1_PARAMETERS_PROGROUP_donotstoremspeaklists	FALSE
RESULTS_SEARCH_1_PARAMETERS_PROGROUP_fasta	C:\AB SCIEX\ProteinPilot Data\SearchDatabases\2019_UP_Mouse_Con.fasta
RESULTS_SEARCH_1_PARAMETERS_PROGROUP_featuregroupminpepconf	0.66
RESULTS_SEARCH_1_PARAMETERS_PROGROUP_featuregroupminups	0.47
RESULTS_SEARCH_1_PARAMETERS_PROGROUP_focusingintersection	4
RESULTS_SEARCH_1_PARAMETERS_PROGROUP_focusingminimummatchconfidence	0.1
RESULTS_SEARCH_1_PARAMETERS_PROGROUP_focusingminunusedprotscore	0.1
RESULTS_SEARCH_1_PARAMETERS_PROGROUP_focusingsubsetcutoff	6
RESULTS_SEARCH_1_PARAMETERS_PROGROUP_intersection	1.3
RESULTS_SEARCH_1_PARAMETERS_PROGROUP_minimummatchconfidencecutoff	0.001
RESULTS_SEARCH_1_PARAMETERS_PROGROUP_minunusedprotscore	0.0458
RESULTS_SEARCH_1_PARAMETERS_PROGROUP_subsetcutoff	2
RESULTS_SEARCH_1_PARAMETERS_PROGROUP_uniprotservicehttpssupported	TRUE
RESULTS_SEARCH_1_PARAMETERS_PROGROUP_unusedprotscorethresholdforexcludingothersfromquant	1.3
RESULTS_SEARCH_1_PARAMETERS_PEAKLIST_count	3872
RESULTS_SEARCH_1_PARAMETERS_PEAKLIST_filenumber	1
RESULTS_SEARCH_1_PARAMETERS_PEAKLIST_original_count	3872
RESULTS_SEARCH_1_PARAMETERS_PEAKLIST_originalfilename	C:\Data\Flores_Mirales\06202019\mus2\06172019_AFlor_Blad_2_A1.mgf
RESULTS_SEARCH_1_PARAMETERS_PEAKLIST_partnumber	1
RESULTS_SEARCH_1_PARAMETERS_QUANT_TYPE_background_correction	FALSE
RESULTS_SEARCH_1_PARAMETERS_QUANT_TYPE_bias_correction	TRUE
RESULTS_SEARCH_1_PARAMETERS_QUANT_TYPE_keep_extreme_peptides_over_fraction	00:00:00
RESULTS_SEARCH_1_PARAMETERS_QUANT_TYPE_low_confidence_check	TRUE
RESULTS_SEARCH_1_PARAMETERS_QUANT_TYPE_low_intensity_check	TRUE
RESULTS_SEARCH_1_PARAMETERS_QUANT_TYPE_median_statistic	TRUE
RESULTS_SEARCH_1_PARAMETERS_QUANT_TYPE_mod_check	TRUE
RESULTS_SEARCH_1_PARAMETERS_QUANT_TYPE_quant_threshold	-1
RESULTS_SEARCH_1_PARAMETERS_QUANT_TYPE_quant_threshold_sn	9
RESULTS_SEARCH_1_PARAMETERS_QUANT_TYPE_separate_searches	FALSE
RESULTS_SEARCH_1_PARAMETERS_QUANT_TYPE_shared_msms_check	TRUE
RESULTS_SEARCH_1_PARAMETERS_PARAGON_METHOD_SETTINGS_UI_SAMPLE_TYPE	Identification
RESULTS_SEARCH_1_PARAMETERS_PARAGON_METHOD_SETTINGS_UI_CYS_ALKYLATION	Iodoacetamide
RESULTS_SEARCH_1_PARAMETERS_PARAGON_METHOD_SETTINGS_UI_DIGESTION	Trypsin
RESULTS_SEARCH_1_PARAMETERS_PARAGON_METHOD_SETTINGS_UI_INSTRUMENT	Orbi MS (1-3ppm), Orbi MS/MS
RESULTS_SEARCH_1_PARAMETERS_PARAGON_METHOD_SETTINGS_UI_SEARCH_EFFORT	Rapid
RESULTS_SEARCH_1_PARAMETERS_PARAGON_METHOD_SETTINGS_UI_USER_NAME	ESC308585\MSPF
RESULTS_SEARCH_1_PARAMETERS_PARAGON_METHOD_SETTINGS_UI_MACHINE_NAME	ESC308585
RESULTS_SEARCH_1_PARAMETERS_PARAGON_METHOD_SETTINGS_UI_SEARCH_ID	6.36965e+17
RESULTS_SEARCH_1_PARAMETERS_PARAGON_METHOD_SETTINGS_UI_START_TIME	2019-06-19 13:41:42
RESULTS_SEARCH_1_PARAMETERS_PARAGON_METHOD_SETTINGS_UI_MIN_UNUSED_PROTSCORE	0.0458
RESULTS_SEARCH_1_PARAMETERS_PARAGON_METHOD_SETTINGS_UI_PSPEP	TRUE
RESULTS_SEARCH_2_time_cpu	68265
RESULTS_SEARCH_2_time_duration	68386
RESULTS_SEARCH_2_version	5.0.2.5174
RESULTS_SEARCH_2_xml:id	SEARCH:1:636965485021443360_1
RESULTS_SEARCH_2_PARAMETERS_chemical_data_edited	FALSE
RESULTS_SEARCH_2_PARAMETERS_do_multiprecursor_search	TRUE
RESULTS_SEARCH_2_PARAMETERS_do_reverse_search	TRUE
RESULTS_SEARCH_2_PARAMETERS_max_quant_labels	1900-02-04
RESULTS_SEARCH_2_PARAMETERS_maxresults	15
RESULTS_SEARCH_2_PARAMETERS_separate_searches	FALSE
RESULTS_SEARCH_2_PARAMETERS_MSTOLERANCE_type	dalton
RESULTS_SEARCH_2_PARAMETERS_MSTOLERANCE_value	0.05
RESULTS_SEARCH_2_PARAMETERS_MSMSTOLERANCE_type	dalton
RESULTS_SEARCH_2_PARAMETERS_MSMSTOLERANCE_value	0.1
RESULTS_SEARCH_2_PARAMETERS_MS_STANDARD_DEVIATION_type	dalton
RESULTS_SEARCH_2_PARAMETERS_MS_STANDARD_DEVIATION_value	0.0025
RESULTS_SEARCH_2_PARAMETERS_MSMS_STANDARD_DEVIATION_type	dalton
RESULTS_SEARCH_2_PARAMETERS_MSMS_STANDARD_DEVIATION_value	0.004
RESULTS_SEARCH_2_PARAMETERS_FASTA_filename	C:\AB SCIEX\ProteinPilot Data\SearchDatabases\2019_UP_Mouse_Con.fasta
RESULTS_SEARCH_2_PARAMETERS_AUTO_CALIBRATION_ms	TRUE
RESULTS_SEARCH_2_PARAMETERS_AUTO_CALIBRATION_msexport	FALSE
RESULTS_SEARCH_2_PARAMETERS_AUTO_CALIBRATION_msms	TRUE
RESULTS_SEARCH_2_PARAMETERS_AUTO_CALIBRATION_msmstolsdratio	3
RESULTS_SEARCH_2_PARAMETERS_AUTO_CALIBRATION_mstolsdratio	11
RESULTS_SEARCH_2_PARAMETERS_AUTO_CALIBRATION_squareroot	FALSE
RESULTS_SEARCH_2_PARAMETERS_AUTO_CALIBRATION_type	dalton
RESULTS_SEARCH_2_PARAMETERS_AUTO_CALIBRATION_MCP_d_s_s_f	0.0666667
RESULTS_SEARCH_2_PARAMETERS_AUTO_CALIBRATION_MCP_d_s_w_f	3
RESULTS_SEARCH_2_PARAMETERS_AUTO_CALIBRATION_MCP_m_f_r_mbc	200
RESULTS_SEARCH_2_PARAMETERS_AUTO_CALIBRATION_MCP_m_m_c	10
RESULTS_SEARCH_2_PARAMETERS_AUTO_CALIBRATION_MCP_m_m_f_s	0.25
RESULTS_SEARCH_2_PARAMETERS_AUTO_CALIBRATION_MCP_m_m_p_f	0.33
RESULTS_SEARCH_2_PARAMETERS_AUTO_CALIBRATION_MCP_m_m_p_rms_f	1
RESULTS_SEARCH_2_PARAMETERS_AUTO_CALIBRATION_MCP_m_p_t_f	1
RESULTS_SEARCH_2_PARAMETERS_AUTO_CALIBRATION_MCP_m_r_h_n_b	15
RESULTS_SEARCH_2_PARAMETERS_AUTO_CALIBRATION_MCP_m_z_n_s	99
RESULTS_SEARCH_2_PARAMETERS_AUTO_CALIBRATION_MCP_m_z_s_mn_f_r	0.0666667
RESULTS_SEARCH_2_PARAMETERS_AUTO_CALIBRATION_MCP_m_z_s_mx_f_r	0.1
RESULTS_SEARCH_2_PARAMETERS_MS_AUTO_CALIBRATION_OUT_avres	9.97196e-13
RESULTS_SEARCH_2_PARAMETERS_MS_AUTO_CALIBRATION_OUT_c0	-0.00216434
RESULTS_SEARCH_2_PARAMETERS_MS_AUTO_CALIBRATION_OUT_c1minus1	-1.16647e-05
RESULTS_SEARCH_2_PARAMETERS_MS_AUTO_CALIBRATION_OUT_c2	0
RESULTS_SEARCH_2_PARAMETERS_MS_AUTO_CALIBRATION_OUT_file	1
RESULTS_SEARCH_2_PARAMETERS_MS_AUTO_CALIBRATION_OUT_partnumber	2
RESULTS_SEARCH_2_PARAMETERS_MS_AUTO_CALIBRATION_OUT_polyorder	1
RESULTS_SEARCH_2_PARAMETERS_MS_AUTO_CALIBRATION_OUT_sample	1
RESULTS_SEARCH_2_PARAMETERS_MS_AUTO_CALIBRATION_OUT_squareroot	FALSE
RESULTS_SEARCH_2_PARAMETERS_MSMS_AUTO_CALIBRATION_OUT_avres	1.86678e-12
RESULTS_SEARCH_2_PARAMETERS_MSMS_AUTO_CALIBRATION_OUT_c0	-0.00096253
RESULTS_SEARCH_2_PARAMETERS_MSMS_AUTO_CALIBRATION_OUT_c1minus1	-9.10098e-06
RESULTS_SEARCH_2_PARAMETERS_MSMS_AUTO_CALIBRATION_OUT_c2	0
RESULTS_SEARCH_2_PARAMETERS_MSMS_AUTO_CALIBRATION_OUT_file	1900-01-01
RESULTS_SEARCH_2_PARAMETERS_MSMS_AUTO_CALIBRATION_OUT_partnumber	2
RESULTS_SEARCH_2_PARAMETERS_MSMS_AUTO_CALIBRATION_OUT_polyorder	1
RESULTS_SEARCH_2_PARAMETERS_MSMS_AUTO_CALIBRATION_OUT_sample	1
RESULTS_SEARCH_2_PARAMETERS_MSMS_AUTO_CALIBRATION_OUT_squareroot	FALSE
RESULTS_SEARCH_2_PARAMETERS_MAX_PRECURSORS_FRAGLET	5
RESULTS_SEARCH_2_PARAMETERS_MAX_PRECURSORS_TAGLET	1
RESULTS_SEARCH_2_PARAMETERS_PRECURSORS_DR_FRAGLET	10
RESULTS_SEARCH_2_PARAMETERS_PRECURSORS_DR_TAGLET	3
RESULTS_SEARCH_2_PARAMETERS_DEFAULT_CHARGE_STATE_1_charge	1
RESULTS_SEARCH_2_PARAMETERS_DEFAULT_CHARGE_STATE_1_probability	1
RESULTS_SEARCH_2_PARAMETERS_DEFAULT_CHARGE_STATE_2_charge	2
RESULTS_SEARCH_2_PARAMETERS_DEFAULT_CHARGE_STATE_2_probability	1
RESULTS_SEARCH_2_PARAMETERS_DEFAULT_CHARGE_STATE_3_charge	3
RESULTS_SEARCH_2_PARAMETERS_DEFAULT_CHARGE_STATE_3_probability	1
RESULTS_SEARCH_2_PARAMETERS_VERSION	5.0.2.0, 5346
RESULTS_SEARCH_2_PARAMETERS_PARAGON_VERSION	5.0.2.0, 5174
RESULTS_SEARCH_2_PARAMETERS_APPLICATION	ProteinPilot(tm) Software
RESULTS_SEARCH_2_PARAMETERS_PROGROUP_alternativedispositionmaximumfoldprobabilitydrop	100
RESULTS_SEARCH_2_PARAMETERS_PROGROUP_alternativedispositionmaximumfoldscoredrop	2
RESULTS_SEARCH_2_PARAMETERS_PROGROUP_autodiscordantpeptidethreshold	0.3
RESULTS_SEARCH_2_PARAMETERS_PROGROUP_bayesconfidencecalclulation	TRUE
RESULTS_SEARCH_2_PARAMETERS_PROGROUP_calibrateconfidence	TRUE
RESULTS_SEARCH_2_PARAMETERS_PROGROUP_compresspeptides	FALSE
RESULTS_SEARCH_2_PARAMETERS_PROGROUP_confidencepercentthresholdforexcludingothersfromquant	15
RESULTS_SEARCH_2_PARAMETERS_PROGROUP_confidencepercentthresholdforincludingselfinquant	15
RESULTS_SEARCH_2_PARAMETERS_PROGROUP_donotstoremspeaklists	FALSE
RESULTS_SEARCH_2_PARAMETERS_PROGROUP_fasta	C:\AB SCIEX\ProteinPilot Data\SearchDatabases\2019_UP_Mouse_Con.fasta
RESULTS_SEARCH_2_PARAMETERS_PROGROUP_featuregroupminpepconf	0.66
RESULTS_SEARCH_2_PARAMETERS_PROGROUP_featuregroupminups	0.47
RESULTS_SEARCH_2_PARAMETERS_PROGROUP_focusingintersection	4
RESULTS_SEARCH_2_PARAMETERS_PROGROUP_focusingminimummatchconfidence	0.1
RESULTS_SEARCH_2_PARAMETERS_PROGROUP_focusingminunusedprotscore	0.1
RESULTS_SEARCH_2_PARAMETERS_PROGROUP_focusingsubsetcutoff	6
RESULTS_SEARCH_2_PARAMETERS_PROGROUP_intersection	1.3
RESULTS_SEARCH_2_PARAMETERS_PROGROUP_minimummatchconfidencecutoff	0.001
RESULTS_SEARCH_2_PARAMETERS_PROGROUP_minunusedprotscore	0.0458
RESULTS_SEARCH_2_PARAMETERS_PROGROUP_subsetcutoff	2
RESULTS_SEARCH_2_PARAMETERS_PROGROUP_uniprotservicehttpssupported	TRUE
RESULTS_SEARCH_2_PARAMETERS_PROGROUP_unusedprotscorethresholdforexcludingothersfromquant	1.3
RESULTS_SEARCH_2_PARAMETERS_PEAKLIST_count	3898
RESULTS_SEARCH_2_PARAMETERS_PEAKLIST_filenumber	1
RESULTS_SEARCH_2_PARAMETERS_PEAKLIST_original_count	3898
RESULTS_SEARCH_2_PARAMETERS_PEAKLIST_originalfilename	C:\Data\Flores_Mirales\06202019\mus2\06172019_AFlor_Blad_2_A1.mgf
RESULTS_SEARCH_2_PARAMETERS_PEAKLIST_partnumber	2
RESULTS_SEARCH_2_PARAMETERS_QUANT_TYPE_background_correction	FALSE
RESULTS_SEARCH_2_PARAMETERS_QUANT_TYPE_bias_correction	TRUE
RESULTS_SEARCH_2_PARAMETERS_QUANT_TYPE_keep_extreme_peptides_over_fraction	0
RESULTS_SEARCH_2_PARAMETERS_QUANT_TYPE_low_confidence_check	TRUE
RESULTS_SEARCH_2_PARAMETERS_QUANT_TYPE_low_intensity_check	TRUE
RESULTS_SEARCH_2_PARAMETERS_QUANT_TYPE_median_statistic	TRUE
RESULTS_SEARCH_2_PARAMETERS_QUANT_TYPE_mod_check	TRUE
RESULTS_SEARCH_2_PARAMETERS_QUANT_TYPE_quant_threshold	-1
RESULTS_SEARCH_2_PARAMETERS_QUANT_TYPE_quant_threshold_sn	9
RESULTS_SEARCH_2_PARAMETERS_QUANT_TYPE_separate_searches	FALSE
RESULTS_SEARCH_2_PARAMETERS_QUANT_TYPE_shared_msms_check	TRUE
RESULTS_SEARCH_2_PARAMETERS_PARAGON_METHOD_SETTINGS_UI_SAMPLE_TYPE	Identification
RESULTS_SEARCH_2_PARAMETERS_PARAGON_METHOD_SETTINGS_UI_CYS_ALKYLATION	Iodoacetamide
RESULTS_SEARCH_2_PARAMETERS_PARAGON_METHOD_SETTINGS_UI_DIGESTION	Trypsin
RESULTS_SEARCH_2_PARAMETERS_PARAGON_METHOD_SETTINGS_UI_INSTRUMENT	Orbi MS (1-3ppm), Orbi MS/MS
RESULTS_SEARCH_2_PARAMETERS_PARAGON_METHOD_SETTINGS_UI_SEARCH_EFFORT	Rapid
RESULTS_SEARCH_2_PARAMETERS_PARAGON_METHOD_SETTINGS_UI_USER_NAME	ESC308585\MSPF
RESULTS_SEARCH_2_PARAMETERS_PARAGON_METHOD_SETTINGS_UI_MACHINE_NAME	ESC308585
RESULTS_SEARCH_2_PARAMETERS_PARAGON_METHOD_SETTINGS_UI_SEARCH_ID	6.36965e+17
RESULTS_SEARCH_2_PARAMETERS_PARAGON_METHOD_SETTINGS_UI_START_TIME	2019-06-19 13:41:42
RESULTS_SEARCH_2_PARAMETERS_PARAGON_METHOD_SETTINGS_UI_MIN_UNUSED_PROTSCORE	0.0458
RESULTS_SEARCH_2_PARAMETERS_PARAGON_METHOD_SETTINGS_UI_PSPEP	TRUE
RESULTS_SEARCH_3_time_cpu	90234
RESULTS_SEARCH_3_time_duration	90413
RESULTS_SEARCH_3_version	5.0.2.5174
RESULTS_SEARCH_3_xml:id	SEARCH:1:636965485021443360_2
RESULTS_SEARCH_3_PARAMETERS_chemical_data_edited	FALSE
RESULTS_SEARCH_3_PARAMETERS_do_multiprecursor_search	TRUE
RESULTS_SEARCH_3_PARAMETERS_do_reverse_search	TRUE
RESULTS_SEARCH_3_PARAMETERS_max_quant_labels	1900-02-04
RESULTS_SEARCH_3_PARAMETERS_maxresults	15
RESULTS_SEARCH_3_PARAMETERS_separate_searches	FALSE
RESULTS_SEARCH_3_PARAMETERS_MSTOLERANCE_type	dalton
RESULTS_SEARCH_3_PARAMETERS_MSTOLERANCE_value	0.05
RESULTS_SEARCH_3_PARAMETERS_MSMSTOLERANCE_type	dalton
RESULTS_SEARCH_3_PARAMETERS_MSMSTOLERANCE_value	0.1
RESULTS_SEARCH_3_PARAMETERS_MS_STANDARD_DEVIATION_type	dalton
RESULTS_SEARCH_3_PARAMETERS_MS_STANDARD_DEVIATION_value	0.0025
RESULTS_SEARCH_3_PARAMETERS_MSMS_STANDARD_DEVIATION_type	dalton
RESULTS_SEARCH_3_PARAMETERS_MSMS_STANDARD_DEVIATION_value	0.004
RESULTS_SEARCH_3_PARAMETERS_FASTA_filename	C:\AB SCIEX\ProteinPilot Data\SearchDatabases\2019_UP_Mouse_Con.fasta
RESULTS_SEARCH_3_PARAMETERS_AUTO_CALIBRATION_ms	TRUE
RESULTS_SEARCH_3_PARAMETERS_AUTO_CALIBRATION_msexport	FALSE
RESULTS_SEARCH_3_PARAMETERS_AUTO_CALIBRATION_msms	TRUE
RESULTS_SEARCH_3_PARAMETERS_AUTO_CALIBRATION_msmstolsdratio	3
RESULTS_SEARCH_3_PARAMETERS_AUTO_CALIBRATION_mstolsdratio	11
RESULTS_SEARCH_3_PARAMETERS_AUTO_CALIBRATION_squareroot	FALSE
RESULTS_SEARCH_3_PARAMETERS_AUTO_CALIBRATION_type	dalton
RESULTS_SEARCH_3_PARAMETERS_AUTO_CALIBRATION_MCP_d_s_s_f	0.0666667
RESULTS_SEARCH_3_PARAMETERS_AUTO_CALIBRATION_MCP_d_s_w_f	3
RESULTS_SEARCH_3_PARAMETERS_AUTO_CALIBRATION_MCP_m_f_r_mbc	200
RESULTS_SEARCH_3_PARAMETERS_AUTO_CALIBRATION_MCP_m_m_c	10
RESULTS_SEARCH_3_PARAMETERS_AUTO_CALIBRATION_MCP_m_m_f_s	0.25
RESULTS_SEARCH_3_PARAMETERS_AUTO_CALIBRATION_MCP_m_m_p_f	0.33
RESULTS_SEARCH_3_PARAMETERS_AUTO_CALIBRATION_MCP_m_m_p_rms_f	1
RESULTS_SEARCH_3_PARAMETERS_AUTO_CALIBRATION_MCP_m_p_t_f	1
RESULTS_SEARCH_3_PARAMETERS_AUTO_CALIBRATION_MCP_m_r_h_n_b	15
RESULTS_SEARCH_3_PARAMETERS_AUTO_CALIBRATION_MCP_m_z_n_s	99
RESULTS_SEARCH_3_PARAMETERS_AUTO_CALIBRATION_MCP_m_z_s_mn_f_r	0.0666667
RESULTS_SEARCH_3_PARAMETERS_AUTO_CALIBRATION_MCP_m_z_s_mx_f_r	0.1
RESULTS_SEARCH_3_PARAMETERS_MS_AUTO_CALIBRATION_OUT_avres	-1.28899e-13
RESULTS_SEARCH_3_PARAMETERS_MS_AUTO_CALIBRATION_OUT_c0	-0.000741345
RESULTS_SEARCH_3_PARAMETERS_MS_AUTO_CALIBRATION_OUT_c1minus1	-1.28624e-05
RESULTS_SEARCH_3_PARAMETERS_MS_AUTO_CALIBRATION_OUT_c2	0
RESULTS_SEARCH_3_PARAMETERS_MS_AUTO_CALIBRATION_OUT_file	1
RESULTS_SEARCH_3_PARAMETERS_MS_AUTO_CALIBRATION_OUT_partnumber	3
RESULTS_SEARCH_3_PARAMETERS_MS_AUTO_CALIBRATION_OUT_polyorder	1
RESULTS_SEARCH_3_PARAMETERS_MS_AUTO_CALIBRATION_OUT_sample	1
RESULTS_SEARCH_3_PARAMETERS_MS_AUTO_CALIBRATION_OUT_squareroot	FALSE
RESULTS_SEARCH_3_PARAMETERS_MSMS_AUTO_CALIBRATION_OUT_avres	2.17184e-12
RESULTS_SEARCH_3_PARAMETERS_MSMS_AUTO_CALIBRATION_OUT_c0	-0.000682735
RESULTS_SEARCH_3_PARAMETERS_MSMS_AUTO_CALIBRATION_OUT_c1minus1	-1.08992e-05
RESULTS_SEARCH_3_PARAMETERS_MSMS_AUTO_CALIBRATION_OUT_c2	0
RESULTS_SEARCH_3_PARAMETERS_MSMS_AUTO_CALIBRATION_OUT_file	1
RESULTS_SEARCH_3_PARAMETERS_MSMS_AUTO_CALIBRATION_OUT_partnumber	3
RESULTS_SEARCH_3_PARAMETERS_MSMS_AUTO_CALIBRATION_OUT_polyorder	1
RESULTS_SEARCH_3_PARAMETERS_MSMS_AUTO_CALIBRATION_OUT_sample	1
RESULTS_SEARCH_3_PARAMETERS_MSMS_AUTO_CALIBRATION_OUT_squareroot	FALSE
RESULTS_SEARCH_3_PARAMETERS_MAX_PRECURSORS_FRAGLET	5
RESULTS_SEARCH_3_PARAMETERS_MAX_PRECURSORS_TAGLET	1
RESULTS_SEARCH_3_PARAMETERS_PRECURSORS_DR_FRAGLET	10
RESULTS_SEARCH_3_PARAMETERS_PRECURSORS_DR_TAGLET	3
RESULTS_SEARCH_3_PARAMETERS_DEFAULT_CHARGE_STATE_1_charge	1
RESULTS_SEARCH_3_PARAMETERS_DEFAULT_CHARGE_STATE_1_probability	1
RESULTS_SEARCH_3_PARAMETERS_DEFAULT_CHARGE_STATE_2_charge	2
RESULTS_SEARCH_3_PARAMETERS_DEFAULT_CHARGE_STATE_2_probability	1
RESULTS_SEARCH_3_PARAMETERS_DEFAULT_CHARGE_STATE_3_charge	1900-01-03
RESULTS_SEARCH_3_PARAMETERS_DEFAULT_CHARGE_STATE_3_probability	1
RESULTS_SEARCH_3_PARAMETERS_VERSION	5.0.2.0, 5346
RESULTS_SEARCH_3_PARAMETERS_PARAGON_VERSION	5.0.2.0, 5174
RESULTS_SEARCH_3_PARAMETERS_APPLICATION	ProteinPilot(tm) Software
RESULTS_SEARCH_3_PARAMETERS_PROGROUP_alternativedispositionmaximumfoldprobabilitydrop	100
RESULTS_SEARCH_3_PARAMETERS_PROGROUP_alternativedispositionmaximumfoldscoredrop	2
RESULTS_SEARCH_3_PARAMETERS_PROGROUP_autodiscordantpeptidethreshold	0.3
RESULTS_SEARCH_3_PARAMETERS_PROGROUP_bayesconfidencecalclulation	TRUE
RESULTS_SEARCH_3_PARAMETERS_PROGROUP_calibrateconfidence	TRUE
RESULTS_SEARCH_3_PARAMETERS_PROGROUP_compresspeptides	FALSE
RESULTS_SEARCH_3_PARAMETERS_PROGROUP_confidencepercentthresholdforexcludingothersfromquant	15
RESULTS_SEARCH_3_PARAMETERS_PROGROUP_confidencepercentthresholdforincludingselfinquant	15
RESULTS_SEARCH_3_PARAMETERS_PROGROUP_donotstoremspeaklists	FALSE
RESULTS_SEARCH_3_PARAMETERS_PROGROUP_fasta	C:\AB SCIEX\ProteinPilot Data\SearchDatabases\2019_UP_Mouse_Con.fasta
RESULTS_SEARCH_3_PARAMETERS_PROGROUP_featuregroupminpepconf	0.66
RESULTS_SEARCH_3_PARAMETERS_PROGROUP_featuregroupminups	0.47
RESULTS_SEARCH_3_PARAMETERS_PROGROUP_focusingintersection	4
RESULTS_SEARCH_3_PARAMETERS_PROGROUP_focusingminimummatchconfidence	0.1
RESULTS_SEARCH_3_PARAMETERS_PROGROUP_focusingminunusedprotscore	0.1
RESULTS_SEARCH_3_PARAMETERS_PROGROUP_focusingsubsetcutoff	6
RESULTS_SEARCH_3_PARAMETERS_PROGROUP_intersection	1.3
RESULTS_SEARCH_3_PARAMETERS_PROGROUP_minimummatchconfidencecutoff	0.001
RESULTS_SEARCH_3_PARAMETERS_PROGROUP_minunusedprotscore	0.0458
RESULTS_SEARCH_3_PARAMETERS_PROGROUP_subsetcutoff	2
RESULTS_SEARCH_3_PARAMETERS_PROGROUP_uniprotservicehttpssupported	TRUE
RESULTS_SEARCH_3_PARAMETERS_PROGROUP_unusedprotscorethresholdforexcludingothersfromquant	1.3
RESULTS_SEARCH_3_PARAMETERS_PEAKLIST_count	2934
RESULTS_SEARCH_3_PARAMETERS_PEAKLIST_filenumber	1
RESULTS_SEARCH_3_PARAMETERS_PEAKLIST_original_count	2934
RESULTS_SEARCH_3_PARAMETERS_PEAKLIST_originalfilename	C:\Data\Flores_Mirales\06202019\mus2\06172019_AFlor_Blad_2_A1.mgf
RESULTS_SEARCH_3_PARAMETERS_PEAKLIST_partnumber	3
RESULTS_SEARCH_3_PARAMETERS_QUANT_TYPE_background_correction	FALSE
RESULTS_SEARCH_3_PARAMETERS_QUANT_TYPE_bias_correction	TRUE
RESULTS_SEARCH_3_PARAMETERS_QUANT_TYPE_keep_extreme_peptides_over_fraction	0
RESULTS_SEARCH_3_PARAMETERS_QUANT_TYPE_low_confidence_check	TRUE
RESULTS_SEARCH_3_PARAMETERS_QUANT_TYPE_low_intensity_check	TRUE
RESULTS_SEARCH_3_PARAMETERS_QUANT_TYPE_median_statistic	TRUE
RESULTS_SEARCH_3_PARAMETERS_QUANT_TYPE_mod_check	TRUE
RESULTS_SEARCH_3_PARAMETERS_QUANT_TYPE_quant_threshold	-1
RESULTS_SEARCH_3_PARAMETERS_QUANT_TYPE_quant_threshold_sn	9
RESULTS_SEARCH_3_PARAMETERS_QUANT_TYPE_separate_searches	FALSE
RESULTS_SEARCH_3_PARAMETERS_QUANT_TYPE_shared_msms_check	TRUE
RESULTS_SEARCH_3_PARAMETERS_PARAGON_METHOD_SETTINGS_UI_SAMPLE_TYPE	Identification
RESULTS_SEARCH_3_PARAMETERS_PARAGON_METHOD_SETTINGS_UI_CYS_ALKYLATION	Iodoacetamide
RESULTS_SEARCH_3_PARAMETERS_PARAGON_METHOD_SETTINGS_UI_DIGESTION	Trypsin
RESULTS_SEARCH_3_PARAMETERS_PARAGON_METHOD_SETTINGS_UI_INSTRUMENT	Orbi MS (1-3ppm), Orbi MS/MS
RESULTS_SEARCH_3_PARAMETERS_PARAGON_METHOD_SETTINGS_UI_SEARCH_EFFORT	Rapid
RESULTS_SEARCH_3_PARAMETERS_PARAGON_METHOD_SETTINGS_UI_USER_NAME	ESC308585\MSPF
RESULTS_SEARCH_3_PARAMETERS_PARAGON_METHOD_SETTINGS_UI_MACHINE_NAME	ESC308585
RESULTS_SEARCH_3_PARAMETERS_PARAGON_METHOD_SETTINGS_UI_SEARCH_ID	6.36965e+17
RESULTS_SEARCH_3_PARAMETERS_PARAGON_METHOD_SETTINGS_UI_START_TIME	2019-06-19 13:41:42
RESULTS_SEARCH_3_PARAMETERS_PARAGON_METHOD_SETTINGS_UI_MIN_UNUSED_PROTSCORE	0.0458
RESULTS_SEARCH_3_PARAMETERS_PARAGON_METHOD_SETTINGS_UI_PSPEP	TRUE
RESULTS_SEARCH_4_time_cpu	93578
RESULTS_SEARCH_4_time_duration	93774
RESULTS_SEARCH_4_version	5.0.2.5174
RESULTS_SEARCH_4_xml:id	SEARCH:1:636965485021443360_3
RESULTS_SEARCH_4_PARAMETERS_chemical_data_edited	FALSE
RESULTS_SEARCH_4_PARAMETERS_do_multiprecursor_search	TRUE
RESULTS_SEARCH_4_PARAMETERS_do_reverse_search	TRUE
RESULTS_SEARCH_4_PARAMETERS_max_quant_labels	35
RESULTS_SEARCH_4_PARAMETERS_maxresults	15
RESULTS_SEARCH_4_PARAMETERS_separate_searches	FALSE
RESULTS_SEARCH_4_PARAMETERS_MSTOLERANCE_type	dalton
RESULTS_SEARCH_4_PARAMETERS_MSTOLERANCE_value	0.05
RESULTS_SEARCH_4_PARAMETERS_MSMSTOLERANCE_type	dalton
RESULTS_SEARCH_4_PARAMETERS_MSMSTOLERANCE_value	0.1
RESULTS_SEARCH_4_PARAMETERS_MS_STANDARD_DEVIATION_type	dalton
RESULTS_SEARCH_4_PARAMETERS_MS_STANDARD_DEVIATION_value	0.0025
RESULTS_SEARCH_4_PARAMETERS_MSMS_STANDARD_DEVIATION_type	dalton
RESULTS_SEARCH_4_PARAMETERS_MSMS_STANDARD_DEVIATION_value	0.004
RESULTS_SEARCH_4_PARAMETERS_FASTA_filename	C:\AB SCIEX\ProteinPilot Data\SearchDatabases\2019_UP_Mouse_Con.fasta
RESULTS_SEARCH_4_PARAMETERS_AUTO_CALIBRATION_ms	TRUE
RESULTS_SEARCH_4_PARAMETERS_AUTO_CALIBRATION_msexport	FALSE
RESULTS_SEARCH_4_PARAMETERS_AUTO_CALIBRATION_msms	TRUE
RESULTS_SEARCH_4_PARAMETERS_AUTO_CALIBRATION_msmstolsdratio	3
RESULTS_SEARCH_4_PARAMETERS_AUTO_CALIBRATION_mstolsdratio	11
RESULTS_SEARCH_4_PARAMETERS_AUTO_CALIBRATION_squareroot	FALSE
RESULTS_SEARCH_4_PARAMETERS_AUTO_CALIBRATION_type	dalton
RESULTS_SEARCH_4_PARAMETERS_AUTO_CALIBRATION_MCP_d_s_s_f	0.0666667
RESULTS_SEARCH_4_PARAMETERS_AUTO_CALIBRATION_MCP_d_s_w_f	3
RESULTS_SEARCH_4_PARAMETERS_AUTO_CALIBRATION_MCP_m_f_r_mbc	200
RESULTS_SEARCH_4_PARAMETERS_AUTO_CALIBRATION_MCP_m_m_c	10
RESULTS_SEARCH_4_PARAMETERS_AUTO_CALIBRATION_MCP_m_m_f_s	0.25
RESULTS_SEARCH_4_PARAMETERS_AUTO_CALIBRATION_MCP_m_m_p_f	0.33
RESULTS_SEARCH_4_PARAMETERS_AUTO_CALIBRATION_MCP_m_m_p_rms_f	1
RESULTS_SEARCH_4_PARAMETERS_AUTO_CALIBRATION_MCP_m_p_t_f	1
RESULTS_SEARCH_4_PARAMETERS_AUTO_CALIBRATION_MCP_m_r_h_n_b	15
RESULTS_SEARCH_4_PARAMETERS_AUTO_CALIBRATION_MCP_m_z_n_s	99
RESULTS_SEARCH_4_PARAMETERS_AUTO_CALIBRATION_MCP_m_z_s_mn_f_r	0.0666667
RESULTS_SEARCH_4_PARAMETERS_AUTO_CALIBRATION_MCP_m_z_s_mx_f_r	0.1
RESULTS_SEARCH_4_PARAMETERS_MS_AUTO_CALIBRATION_OUT_avres	-1.25056e-12
RESULTS_SEARCH_4_PARAMETERS_MS_AUTO_CALIBRATION_OUT_c0	-0.0028623
RESULTS_SEARCH_4_PARAMETERS_MS_AUTO_CALIBRATION_OUT_c1minus1	-9.99583e-06
RESULTS_SEARCH_4_PARAMETERS_MS_AUTO_CALIBRATION_OUT_c2	0
RESULTS_SEARCH_4_PARAMETERS_MS_AUTO_CALIBRATION_OUT_file	1
RESULTS_SEARCH_4_PARAMETERS_MS_AUTO_CALIBRATION_OUT_partnumber	4
RESULTS_SEARCH_4_PARAMETERS_MS_AUTO_CALIBRATION_OUT_polyorder	1
RESULTS_SEARCH_4_PARAMETERS_MS_AUTO_CALIBRATION_OUT_sample	1
RESULTS_SEARCH_4_PARAMETERS_MS_AUTO_CALIBRATION_OUT_squareroot	FALSE
RESULTS_SEARCH_4_PARAMETERS_MSMS_AUTO_CALIBRATION_OUT_avres	-8.72392e-13
RESULTS_SEARCH_4_PARAMETERS_MSMS_AUTO_CALIBRATION_OUT_c0	-0.00231827
RESULTS_SEARCH_4_PARAMETERS_MSMS_AUTO_CALIBRATION_OUT_c1minus1	-7.88698e-06
RESULTS_SEARCH_4_PARAMETERS_MSMS_AUTO_CALIBRATION_OUT_c2	0
RESULTS_SEARCH_4_PARAMETERS_MSMS_AUTO_CALIBRATION_OUT_file	1
RESULTS_SEARCH_4_PARAMETERS_MSMS_AUTO_CALIBRATION_OUT_partnumber	4
RESULTS_SEARCH_4_PARAMETERS_MSMS_AUTO_CALIBRATION_OUT_polyorder	1
RESULTS_SEARCH_4_PARAMETERS_MSMS_AUTO_CALIBRATION_OUT_sample	1
RESULTS_SEARCH_4_PARAMETERS_MSMS_AUTO_CALIBRATION_OUT_squareroot	FALSE
RESULTS_SEARCH_4_PARAMETERS_MAX_PRECURSORS_FRAGLET	5
RESULTS_SEARCH_4_PARAMETERS_MAX_PRECURSORS_TAGLET	1
RESULTS_SEARCH_4_PARAMETERS_PRECURSORS_DR_FRAGLET	10
RESULTS_SEARCH_4_PARAMETERS_PRECURSORS_DR_TAGLET	3
RESULTS_SEARCH_4_PARAMETERS_DEFAULT_CHARGE_STATE_1_charge	1
RESULTS_SEARCH_4_PARAMETERS_DEFAULT_CHARGE_STATE_1_probability	1
RESULTS_SEARCH_4_PARAMETERS_DEFAULT_CHARGE_STATE_2_charge	2
RESULTS_SEARCH_4_PARAMETERS_DEFAULT_CHARGE_STATE_2_probability	1
RESULTS_SEARCH_4_PARAMETERS_DEFAULT_CHARGE_STATE_3_charge	3
RESULTS_SEARCH_4_PARAMETERS_DEFAULT_CHARGE_STATE_3_probability	1
RESULTS_SEARCH_4_PARAMETERS_VERSION	5.0.2.0, 5346
RESULTS_SEARCH_4_PARAMETERS_PARAGON_VERSION	5.0.2.0, 5174
RESULTS_SEARCH_4_PARAMETERS_APPLICATION	ProteinPilot(tm) Software
RESULTS_SEARCH_4_PARAMETERS_PROGROUP_alternativedispositionmaximumfoldprobabilitydrop	100
RESULTS_SEARCH_4_PARAMETERS_PROGROUP_alternativedispositionmaximumfoldscoredrop	2
RESULTS_SEARCH_4_PARAMETERS_PROGROUP_autodiscordantpeptidethreshold	0.3
RESULTS_SEARCH_4_PARAMETERS_PROGROUP_bayesconfidencecalclulation	TRUE
RESULTS_SEARCH_4_PARAMETERS_PROGROUP_calibrateconfidence	TRUE
RESULTS_SEARCH_4_PARAMETERS_PROGROUP_compresspeptides	FALSE
RESULTS_SEARCH_4_PARAMETERS_PROGROUP_confidencepercentthresholdforexcludingothersfromquant	15
RESULTS_SEARCH_4_PARAMETERS_PROGROUP_confidencepercentthresholdforincludingselfinquant	15
RESULTS_SEARCH_4_PARAMETERS_PROGROUP_donotstoremspeaklists	FALSE
RESULTS_SEARCH_4_PARAMETERS_PROGROUP_fasta	C:\AB SCIEX\ProteinPilot Data\SearchDatabases\2019_UP_Mouse_Con.fasta
RESULTS_SEARCH_4_PARAMETERS_PROGROUP_featuregroupminpepconf	0.66
RESULTS_SEARCH_4_PARAMETERS_PROGROUP_featuregroupminups	0.47
RESULTS_SEARCH_4_PARAMETERS_PROGROUP_focusingintersection	4
RESULTS_SEARCH_4_PARAMETERS_PROGROUP_focusingminimummatchconfidence	0.1
RESULTS_SEARCH_4_PARAMETERS_PROGROUP_focusingminunusedprotscore	0.1
RESULTS_SEARCH_4_PARAMETERS_PROGROUP_focusingsubsetcutoff	6
RESULTS_SEARCH_4_PARAMETERS_PROGROUP_intersection	1.3
RESULTS_SEARCH_4_PARAMETERS_PROGROUP_minimummatchconfidencecutoff	0.001
RESULTS_SEARCH_4_PARAMETERS_PROGROUP_minunusedprotscore	0.0458
RESULTS_SEARCH_4_PARAMETERS_PROGROUP_subsetcutoff	2
RESULTS_SEARCH_4_PARAMETERS_PROGROUP_uniprotservicehttpssupported	TRUE
RESULTS_SEARCH_4_PARAMETERS_PROGROUP_unusedprotscorethresholdforexcludingothersfromquant	1.3
RESULTS_SEARCH_4_PARAMETERS_PEAKLIST_count	3391
RESULTS_SEARCH_4_PARAMETERS_PEAKLIST_filenumber	1
RESULTS_SEARCH_4_PARAMETERS_PEAKLIST_original_count	3391
RESULTS_SEARCH_4_PARAMETERS_PEAKLIST_originalfilename	C:\Data\Flores_Mirales\06202019\mus2\06172019_AFlor_Blad_2_A1.mgf
RESULTS_SEARCH_4_PARAMETERS_PEAKLIST_partnumber	4
RESULTS_SEARCH_4_PARAMETERS_QUANT_TYPE_background_correction	FALSE
RESULTS_SEARCH_4_PARAMETERS_QUANT_TYPE_bias_correction	TRUE
RESULTS_SEARCH_4_PARAMETERS_QUANT_TYPE_keep_extreme_peptides_over_fraction	0
RESULTS_SEARCH_4_PARAMETERS_QUANT_TYPE_low_confidence_check	TRUE
RESULTS_SEARCH_4_PARAMETERS_QUANT_TYPE_low_intensity_check	TRUE
RESULTS_SEARCH_4_PARAMETERS_QUANT_TYPE_median_statistic	TRUE
RESULTS_SEARCH_4_PARAMETERS_QUANT_TYPE_mod_check	TRUE
RESULTS_SEARCH_4_PARAMETERS_QUANT_TYPE_quant_threshold	-1
RESULTS_SEARCH_4_PARAMETERS_QUANT_TYPE_quant_threshold_sn	9
RESULTS_SEARCH_4_PARAMETERS_QUANT_TYPE_separate_searches	FALSE
RESULTS_SEARCH_4_PARAMETERS_QUANT_TYPE_shared_msms_check	TRUE
RESULTS_SEARCH_4_PARAMETERS_PARAGON_METHOD_SETTINGS_UI_SAMPLE_TYPE	Identification
RESULTS_SEARCH_4_PARAMETERS_PARAGON_METHOD_SETTINGS_UI_CYS_ALKYLATION	Iodoacetamide
RESULTS_SEARCH_4_PARAMETERS_PARAGON_METHOD_SETTINGS_UI_DIGESTION	Trypsin
RESULTS_SEARCH_4_PARAMETERS_PARAGON_METHOD_SETTINGS_UI_INSTRUMENT	Orbi MS (1-3ppm), Orbi MS/MS
RESULTS_SEARCH_4_PARAMETERS_PARAGON_METHOD_SETTINGS_UI_SEARCH_EFFORT	Rapid
RESULTS_SEARCH_4_PARAMETERS_PARAGON_METHOD_SETTINGS_UI_USER_NAME	ESC308585\MSPF
RESULTS_SEARCH_4_PARAMETERS_PARAGON_METHOD_SETTINGS_UI_MACHINE_NAME	ESC308585
RESULTS_SEARCH_4_PARAMETERS_PARAGON_METHOD_SETTINGS_UI_SEARCH_ID	6.36965e+17
RESULTS_SEARCH_4_PARAMETERS_PARAGON_METHOD_SETTINGS_UI_START_TIME	2019-06-19 13:41:42
RESULTS_SEARCH_4_PARAMETERS_PARAGON_METHOD_SETTINGS_UI_MIN_UNUSED_PROTSCORE	0.0458
RESULTS_SEARCH_4_PARAMETERS_PARAGON_METHOD_SETTINGS_UI_PSPEP	TRUE
RESULTS_SEARCH_5_time_cpu	94828
RESULTS_SEARCH_5_time_duration	2160-04-15
RESULTS_SEARCH_5_version	5.0.2.5174
RESULTS_SEARCH_5_xml:id	SEARCH:1:636965485021443360_4
RESULTS_SEARCH_5_PARAMETERS_chemical_data_edited	FALSE
RESULTS_SEARCH_5_PARAMETERS_do_multiprecursor_search	TRUE
RESULTS_SEARCH_5_PARAMETERS_do_reverse_search	TRUE
RESULTS_SEARCH_5_PARAMETERS_max_quant_labels	35
RESULTS_SEARCH_5_PARAMETERS_maxresults	15
RESULTS_SEARCH_5_PARAMETERS_separate_searches	FALSE
RESULTS_SEARCH_5_PARAMETERS_MSTOLERANCE_type	dalton
RESULTS_SEARCH_5_PARAMETERS_MSTOLERANCE_value	0.05
RESULTS_SEARCH_5_PARAMETERS_MSMSTOLERANCE_type	dalton
RESULTS_SEARCH_5_PARAMETERS_MSMSTOLERANCE_value	0.1
RESULTS_SEARCH_5_PARAMETERS_MS_STANDARD_DEVIATION_type	dalton
RESULTS_SEARCH_5_PARAMETERS_MS_STANDARD_DEVIATION_value	0.0025
RESULTS_SEARCH_5_PARAMETERS_MSMS_STANDARD_DEVIATION_type	dalton
RESULTS_SEARCH_5_PARAMETERS_MSMS_STANDARD_DEVIATION_value	0.004
RESULTS_SEARCH_5_PARAMETERS_FASTA_filename	C:\AB SCIEX\ProteinPilot Data\SearchDatabases\2019_UP_Mouse_Con.fasta
RESULTS_SEARCH_5_PARAMETERS_AUTO_CALIBRATION_ms	TRUE
RESULTS_SEARCH_5_PARAMETERS_AUTO_CALIBRATION_msexport	FALSE
RESULTS_SEARCH_5_PARAMETERS_AUTO_CALIBRATION_msms	TRUE
RESULTS_SEARCH_5_PARAMETERS_AUTO_CALIBRATION_msmstolsdratio	3
RESULTS_SEARCH_5_PARAMETERS_AUTO_CALIBRATION_mstolsdratio	11
RESULTS_SEARCH_5_PARAMETERS_AUTO_CALIBRATION_squareroot	FALSE
RESULTS_SEARCH_5_PARAMETERS_AUTO_CALIBRATION_type	dalton
RESULTS_SEARCH_5_PARAMETERS_AUTO_CALIBRATION_MCP_d_s_s_f	0.0666667
RESULTS_SEARCH_5_PARAMETERS_AUTO_CALIBRATION_MCP_d_s_w_f	3
RESULTS_SEARCH_5_PARAMETERS_AUTO_CALIBRATION_MCP_m_f_r_mbc	200
RESULTS_SEARCH_5_PARAMETERS_AUTO_CALIBRATION_MCP_m_m_c	10
RESULTS_SEARCH_5_PARAMETERS_AUTO_CALIBRATION_MCP_m_m_f_s	0.25
RESULTS_SEARCH_5_PARAMETERS_AUTO_CALIBRATION_MCP_m_m_p_f	0.33
RESULTS_SEARCH_5_PARAMETERS_AUTO_CALIBRATION_MCP_m_m_p_rms_f	1
RESULTS_SEARCH_5_PARAMETERS_AUTO_CALIBRATION_MCP_m_p_t_f	1
RESULTS_SEARCH_5_PARAMETERS_AUTO_CALIBRATION_MCP_m_r_h_n_b	15
RESULTS_SEARCH_5_PARAMETERS_AUTO_CALIBRATION_MCP_m_z_n_s	99
RESULTS_SEARCH_5_PARAMETERS_AUTO_CALIBRATION_MCP_m_z_s_mn_f_r	0.0666667
RESULTS_SEARCH_5_PARAMETERS_AUTO_CALIBRATION_MCP_m_z_s_mx_f_r	0.1
RESULTS_SEARCH_5_PARAMETERS_MS_AUTO_CALIBRATION_OUT_avres	-2.66875e-12
RESULTS_SEARCH_5_PARAMETERS_MS_AUTO_CALIBRATION_OUT_c0	-0.00156213
RESULTS_SEARCH_5_PARAMETERS_MS_AUTO_CALIBRATION_OUT_c1minus1	-1.21742e-05
RESULTS_SEARCH_5_PARAMETERS_MS_AUTO_CALIBRATION_OUT_c2	0
RESULTS_SEARCH_5_PARAMETERS_MS_AUTO_CALIBRATION_OUT_file	1
RESULTS_SEARCH_5_PARAMETERS_MS_AUTO_CALIBRATION_OUT_partnumber	5
RESULTS_SEARCH_5_PARAMETERS_MS_AUTO_CALIBRATION_OUT_polyorder	1
RESULTS_SEARCH_5_PARAMETERS_MS_AUTO_CALIBRATION_OUT_sample	1
RESULTS_SEARCH_5_PARAMETERS_MS_AUTO_CALIBRATION_OUT_squareroot	FALSE
RESULTS_SEARCH_5_PARAMETERS_MSMS_AUTO_CALIBRATION_OUT_avres	6.56875e-13
RESULTS_SEARCH_5_PARAMETERS_MSMS_AUTO_CALIBRATION_OUT_c0	-0.00338143
RESULTS_SEARCH_5_PARAMETERS_MSMS_AUTO_CALIBRATION_OUT_c1minus1	-6.24732e-06
RESULTS_SEARCH_5_PARAMETERS_MSMS_AUTO_CALIBRATION_OUT_c2	0
RESULTS_SEARCH_5_PARAMETERS_MSMS_AUTO_CALIBRATION_OUT_file	1
RESULTS_SEARCH_5_PARAMETERS_MSMS_AUTO_CALIBRATION_OUT_partnumber	5
RESULTS_SEARCH_5_PARAMETERS_MSMS_AUTO_CALIBRATION_OUT_polyorder	1
RESULTS_SEARCH_5_PARAMETERS_MSMS_AUTO_CALIBRATION_OUT_sample	1
RESULTS_SEARCH_5_PARAMETERS_MSMS_AUTO_CALIBRATION_OUT_squareroot	FALSE
RESULTS_SEARCH_5_PARAMETERS_MAX_PRECURSORS_FRAGLET	5
RESULTS_SEARCH_5_PARAMETERS_MAX_PRECURSORS_TAGLET	1
RESULTS_SEARCH_5_PARAMETERS_PRECURSORS_DR_FRAGLET	10
RESULTS_SEARCH_5_PARAMETERS_PRECURSORS_DR_TAGLET	3
RESULTS_SEARCH_5_PARAMETERS_DEFAULT_CHARGE_STATE_1_charge	1
RESULTS_SEARCH_5_PARAMETERS_DEFAULT_CHARGE_STATE_1_probability	1
RESULTS_SEARCH_5_PARAMETERS_DEFAULT_CHARGE_STATE_2_charge	2
RESULTS_SEARCH_5_PARAMETERS_DEFAULT_CHARGE_STATE_2_probability	1
RESULTS_SEARCH_5_PARAMETERS_DEFAULT_CHARGE_STATE_3_charge	3
RESULTS_SEARCH_5_PARAMETERS_DEFAULT_CHARGE_STATE_3_probability	1
RESULTS_SEARCH_5_PARAMETERS_VERSION	5.0.2.0, 5346
RESULTS_SEARCH_5_PARAMETERS_PARAGON_VERSION	5.0.2.0, 5174
RESULTS_SEARCH_5_PARAMETERS_APPLICATION	ProteinPilot(tm) Software
RESULTS_SEARCH_5_PARAMETERS_PROGROUP_alternativedispositionmaximumfoldprobabilitydrop	100
RESULTS_SEARCH_5_PARAMETERS_PROGROUP_alternativedispositionmaximumfoldscoredrop	2
RESULTS_SEARCH_5_PARAMETERS_PROGROUP_autodiscordantpeptidethreshold	0.3
RESULTS_SEARCH_5_PARAMETERS_PROGROUP_bayesconfidencecalclulation	TRUE
RESULTS_SEARCH_5_PARAMETERS_PROGROUP_calibrateconfidence	TRUE
RESULTS_SEARCH_5_PARAMETERS_PROGROUP_compresspeptides	FALSE
RESULTS_SEARCH_5_PARAMETERS_PROGROUP_confidencepercentthresholdforexcludingothersfromquant	15
RESULTS_SEARCH_5_PARAMETERS_PROGROUP_confidencepercentthresholdforincludingselfinquant	15
RESULTS_SEARCH_5_PARAMETERS_PROGROUP_donotstoremspeaklists	FALSE
RESULTS_SEARCH_5_PARAMETERS_PROGROUP_fasta	C:\AB SCIEX\ProteinPilot Data\SearchDatabases\2019_UP_Mouse_Con.fasta
RESULTS_SEARCH_5_PARAMETERS_PROGROUP_featuregroupminpepconf	0.66
RESULTS_SEARCH_5_PARAMETERS_PROGROUP_featuregroupminups	0.47
RESULTS_SEARCH_5_PARAMETERS_PROGROUP_focusingintersection	4
RESULTS_SEARCH_5_PARAMETERS_PROGROUP_focusingminimummatchconfidence	0.1
RESULTS_SEARCH_5_PARAMETERS_PROGROUP_focusingminunusedprotscore	0.1
RESULTS_SEARCH_5_PARAMETERS_PROGROUP_focusingsubsetcutoff	6
RESULTS_SEARCH_5_PARAMETERS_PROGROUP_intersection	1.3
RESULTS_SEARCH_5_PARAMETERS_PROGROUP_minimummatchconfidencecutoff	0.001
RESULTS_SEARCH_5_PARAMETERS_PROGROUP_minunusedprotscore	0.0458
RESULTS_SEARCH_5_PARAMETERS_PROGROUP_subsetcutoff	2
RESULTS_SEARCH_5_PARAMETERS_PROGROUP_uniprotservicehttpssupported	TRUE
RESULTS_SEARCH_5_PARAMETERS_PROGROUP_unusedprotscorethresholdforexcludingothersfromquant	1.3
RESULTS_SEARCH_5_PARAMETERS_PEAKLIST_count	3795
RESULTS_SEARCH_5_PARAMETERS_PEAKLIST_filenumber	1
RESULTS_SEARCH_5_PARAMETERS_PEAKLIST_original_count	3795
RESULTS_SEARCH_5_PARAMETERS_PEAKLIST_originalfilename	C:\Data\Flores_Mirales\06202019\mus2\06172019_AFlor_Blad_2_A1.mgf
RESULTS_SEARCH_5_PARAMETERS_PEAKLIST_partnumber	5
RESULTS_SEARCH_5_PARAMETERS_QUANT_TYPE_background_correction	FALSE
RESULTS_SEARCH_5_PARAMETERS_QUANT_TYPE_bias_correction	TRUE
RESULTS_SEARCH_5_PARAMETERS_QUANT_TYPE_keep_extreme_peptides_over_fraction	0
RESULTS_SEARCH_5_PARAMETERS_QUANT_TYPE_low_confidence_check	TRUE
RESULTS_SEARCH_5_PARAMETERS_QUANT_TYPE_low_intensity_check	TRUE
RESULTS_SEARCH_5_PARAMETERS_QUANT_TYPE_median_statistic	TRUE
RESULTS_SEARCH_5_PARAMETERS_QUANT_TYPE_mod_check	TRUE
RESULTS_SEARCH_5_PARAMETERS_QUANT_TYPE_quant_threshold	-1
RESULTS_SEARCH_5_PARAMETERS_QUANT_TYPE_quant_threshold_sn	9
RESULTS_SEARCH_5_PARAMETERS_QUANT_TYPE_separate_searches	FALSE
RESULTS_SEARCH_5_PARAMETERS_QUANT_TYPE_shared_msms_check	TRUE
RESULTS_SEARCH_5_PARAMETERS_PARAGON_METHOD_SETTINGS_UI_SAMPLE_TYPE	Identification
RESULTS_SEARCH_5_PARAMETERS_PARAGON_METHOD_SETTINGS_UI_CYS_ALKYLATION	Iodoacetamide
RESULTS_SEARCH_5_PARAMETERS_PARAGON_METHOD_SETTINGS_UI_DIGESTION	Trypsin
RESULTS_SEARCH_5_PARAMETERS_PARAGON_METHOD_SETTINGS_UI_INSTRUMENT	Orbi MS (1-3ppm), Orbi MS/MS
RESULTS_SEARCH_5_PARAMETERS_PARAGON_METHOD_SETTINGS_UI_SEARCH_EFFORT	Rapid
RESULTS_SEARCH_5_PARAMETERS_PARAGON_METHOD_SETTINGS_UI_USER_NAME	ESC308585\MSPF
RESULTS_SEARCH_5_PARAMETERS_PARAGON_METHOD_SETTINGS_UI_MACHINE_NAME	ESC308585
RESULTS_SEARCH_5_PARAMETERS_PARAGON_METHOD_SETTINGS_UI_SEARCH_ID	6.36965e+17
RESULTS_SEARCH_5_PARAMETERS_PARAGON_METHOD_SETTINGS_UI_START_TIME	2019-06-19 13:41:42
RESULTS_SEARCH_5_PARAMETERS_PARAGON_METHOD_SETTINGS_UI_MIN_UNUSED_PROTSCORE	0.0458
RESULTS_SEARCH_5_PARAMETERS_PARAGON_METHOD_SETTINGS_UI_PSPEP	TRUE
RESULTS_SEARCH_6_time_cpu	82750
RESULTS_SEARCH_6_time_duration	82972
RESULTS_SEARCH_6_version	5.0.2.5174
RESULTS_SEARCH_6_xml:id	SEARCH:1:636965485021443360_5
RESULTS_SEARCH_6_PARAMETERS_chemical_data_edited	FALSE
RESULTS_SEARCH_6_PARAMETERS_do_multiprecursor_search	TRUE
RESULTS_SEARCH_6_PARAMETERS_do_reverse_search	TRUE
RESULTS_SEARCH_6_PARAMETERS_max_quant_labels	35
RESULTS_SEARCH_6_PARAMETERS_maxresults	15
RESULTS_SEARCH_6_PARAMETERS_separate_searches	FALSE
RESULTS_SEARCH_6_PARAMETERS_MSTOLERANCE_type	dalton
RESULTS_SEARCH_6_PARAMETERS_MSTOLERANCE_value	0.05
RESULTS_SEARCH_6_PARAMETERS_MSMSTOLERANCE_type	dalton
RESULTS_SEARCH_6_PARAMETERS_MSMSTOLERANCE_value	0.1
RESULTS_SEARCH_6_PARAMETERS_MS_STANDARD_DEVIATION_type	dalton
RESULTS_SEARCH_6_PARAMETERS_MS_STANDARD_DEVIATION_value	0.0025
RESULTS_SEARCH_6_PARAMETERS_MSMS_STANDARD_DEVIATION_type	dalton
RESULTS_SEARCH_6_PARAMETERS_MSMS_STANDARD_DEVIATION_value	0.004
RESULTS_SEARCH_6_PARAMETERS_FASTA_filename	C:\AB SCIEX\ProteinPilot Data\SearchDatabases\2019_UP_Mouse_Con.fasta
RESULTS_SEARCH_6_PARAMETERS_AUTO_CALIBRATION_ms	TRUE
RESULTS_SEARCH_6_PARAMETERS_AUTO_CALIBRATION_msexport	FALSE
RESULTS_SEARCH_6_PARAMETERS_AUTO_CALIBRATION_msms	TRUE
RESULTS_SEARCH_6_PARAMETERS_AUTO_CALIBRATION_msmstolsdratio	3
RESULTS_SEARCH_6_PARAMETERS_AUTO_CALIBRATION_mstolsdratio	11
RESULTS_SEARCH_6_PARAMETERS_AUTO_CALIBRATION_squareroot	FALSE
RESULTS_SEARCH_6_PARAMETERS_AUTO_CALIBRATION_type	dalton
RESULTS_SEARCH_6_PARAMETERS_AUTO_CALIBRATION_MCP_d_s_s_f	0.0666667
RESULTS_SEARCH_6_PARAMETERS_AUTO_CALIBRATION_MCP_d_s_w_f	3
RESULTS_SEARCH_6_PARAMETERS_AUTO_CALIBRATION_MCP_m_f_r_mbc	200
RESULTS_SEARCH_6_PARAMETERS_AUTO_CALIBRATION_MCP_m_m_c	10
RESULTS_SEARCH_6_PARAMETERS_AUTO_CALIBRATION_MCP_m_m_f_s	0.25
RESULTS_SEARCH_6_PARAMETERS_AUTO_CALIBRATION_MCP_m_m_p_f	0.33
RESULTS_SEARCH_6_PARAMETERS_AUTO_CALIBRATION_MCP_m_m_p_rms_f	1
RESULTS_SEARCH_6_PARAMETERS_AUTO_CALIBRATION_MCP_m_p_t_f	1
RESULTS_SEARCH_6_PARAMETERS_AUTO_CALIBRATION_MCP_m_r_h_n_b	15
RESULTS_SEARCH_6_PARAMETERS_AUTO_CALIBRATION_MCP_m_z_n_s	99
RESULTS_SEARCH_6_PARAMETERS_AUTO_CALIBRATION_MCP_m_z_s_mn_f_r	0.0666667
RESULTS_SEARCH_6_PARAMETERS_AUTO_CALIBRATION_MCP_m_z_s_mx_f_r	0.1
RESULTS_SEARCH_6_PARAMETERS_MS_AUTO_CALIBRATION_OUT_avres	2.85375e-12
RESULTS_SEARCH_6_PARAMETERS_MS_AUTO_CALIBRATION_OUT_c0	-0.00249817
RESULTS_SEARCH_6_PARAMETERS_MS_AUTO_CALIBRATION_OUT_c1minus1	-1.07768e-05
RESULTS_SEARCH_6_PARAMETERS_MS_AUTO_CALIBRATION_OUT_c2	0
RESULTS_SEARCH_6_PARAMETERS_MS_AUTO_CALIBRATION_OUT_file	1
RESULTS_SEARCH_6_PARAMETERS_MS_AUTO_CALIBRATION_OUT_partnumber	6
RESULTS_SEARCH_6_PARAMETERS_MS_AUTO_CALIBRATION_OUT_polyorder	1
RESULTS_SEARCH_6_PARAMETERS_MS_AUTO_CALIBRATION_OUT_sample	1
RESULTS_SEARCH_6_PARAMETERS_MS_AUTO_CALIBRATION_OUT_squareroot	FALSE
RESULTS_SEARCH_6_PARAMETERS_MSMS_AUTO_CALIBRATION_OUT_avres	8.60727e-13
RESULTS_SEARCH_6_PARAMETERS_MSMS_AUTO_CALIBRATION_OUT_c0	-0.00313025
RESULTS_SEARCH_6_PARAMETERS_MSMS_AUTO_CALIBRATION_OUT_c1minus1	-5.72805e-06
RESULTS_SEARCH_6_PARAMETERS_MSMS_AUTO_CALIBRATION_OUT_c2	0
RESULTS_SEARCH_6_PARAMETERS_MSMS_AUTO_CALIBRATION_OUT_file	1
RESULTS_SEARCH_6_PARAMETERS_MSMS_AUTO_CALIBRATION_OUT_partnumber	6
RESULTS_SEARCH_6_PARAMETERS_MSMS_AUTO_CALIBRATION_OUT_polyorder	1
RESULTS_SEARCH_6_PARAMETERS_MSMS_AUTO_CALIBRATION_OUT_sample	1
RESULTS_SEARCH_6_PARAMETERS_MSMS_AUTO_CALIBRATION_OUT_squareroot	FALSE
RESULTS_SEARCH_6_PARAMETERS_MAX_PRECURSORS_FRAGLET	5
RESULTS_SEARCH_6_PARAMETERS_MAX_PRECURSORS_TAGLET	1
RESULTS_SEARCH_6_PARAMETERS_PRECURSORS_DR_FRAGLET	10
RESULTS_SEARCH_6_PARAMETERS_PRECURSORS_DR_TAGLET	3
RESULTS_SEARCH_6_PARAMETERS_DEFAULT_CHARGE_STATE_1_charge	1
RESULTS_SEARCH_6_PARAMETERS_DEFAULT_CHARGE_STATE_1_probability	1
RESULTS_SEARCH_6_PARAMETERS_DEFAULT_CHARGE_STATE_2_charge	2
RESULTS_SEARCH_6_PARAMETERS_DEFAULT_CHARGE_STATE_2_probability	1
RESULTS_SEARCH_6_PARAMETERS_DEFAULT_CHARGE_STATE_3_charge	3
RESULTS_SEARCH_6_PARAMETERS_DEFAULT_CHARGE_STATE_3_probability	1
RESULTS_SEARCH_6_PARAMETERS_VERSION	5.0.2.0, 5346
RESULTS_SEARCH_6_PARAMETERS_PARAGON_VERSION	5.0.2.0, 5174
RESULTS_SEARCH_6_PARAMETERS_APPLICATION	ProteinPilot(tm) Software
RESULTS_SEARCH_6_PARAMETERS_PROGROUP_alternativedispositionmaximumfoldprobabilitydrop	100
RESULTS_SEARCH_6_PARAMETERS_PROGROUP_alternativedispositionmaximumfoldscoredrop	2
RESULTS_SEARCH_6_PARAMETERS_PROGROUP_autodiscordantpeptidethreshold	07:12:00
RESULTS_SEARCH_6_PARAMETERS_PROGROUP_bayesconfidencecalclulation	TRUE
RESULTS_SEARCH_6_PARAMETERS_PROGROUP_calibrateconfidence	TRUE
RESULTS_SEARCH_6_PARAMETERS_PROGROUP_compresspeptides	FALSE
RESULTS_SEARCH_6_PARAMETERS_PROGROUP_confidencepercentthresholdforexcludingothersfromquant	15
RESULTS_SEARCH_6_PARAMETERS_PROGROUP_confidencepercentthresholdforincludingselfinquant	15
RESULTS_SEARCH_6_PARAMETERS_PROGROUP_donotstoremspeaklists	FALSE
RESULTS_SEARCH_6_PARAMETERS_PROGROUP_fasta	C:\AB SCIEX\ProteinPilot Data\SearchDatabases\2019_UP_Mouse_Con.fasta
RESULTS_SEARCH_6_PARAMETERS_PROGROUP_featuregroupminpepconf	0.66
RESULTS_SEARCH_6_PARAMETERS_PROGROUP_featuregroupminups	0.47
RESULTS_SEARCH_6_PARAMETERS_PROGROUP_focusingintersection	4
RESULTS_SEARCH_6_PARAMETERS_PROGROUP_focusingminimummatchconfidence	0.1
RESULTS_SEARCH_6_PARAMETERS_PROGROUP_focusingminunusedprotscore	0.1
RESULTS_SEARCH_6_PARAMETERS_PROGROUP_focusingsubsetcutoff	6
RESULTS_SEARCH_6_PARAMETERS_PROGROUP_intersection	1.3
RESULTS_SEARCH_6_PARAMETERS_PROGROUP_minimummatchconfidencecutoff	0.001
RESULTS_SEARCH_6_PARAMETERS_PROGROUP_minunusedprotscore	0.0458
RESULTS_SEARCH_6_PARAMETERS_PROGROUP_subsetcutoff	2
RESULTS_SEARCH_6_PARAMETERS_PROGROUP_uniprotservicehttpssupported	TRUE
RESULTS_SEARCH_6_PARAMETERS_PROGROUP_unusedprotscorethresholdforexcludingothersfromquant	1.3
RESULTS_SEARCH_6_PARAMETERS_PEAKLIST_count	3902
RESULTS_SEARCH_6_PARAMETERS_PEAKLIST_filenumber	1
RESULTS_SEARCH_6_PARAMETERS_PEAKLIST_original_count	3902
RESULTS_SEARCH_6_PARAMETERS_PEAKLIST_originalfilename	C:\Data\Flores_Mirales\06202019\mus2\06172019_AFlor_Blad_2_A1.mgf
RESULTS_SEARCH_6_PARAMETERS_PEAKLIST_partnumber	6
RESULTS_SEARCH_6_PARAMETERS_QUANT_TYPE_background_correction	FALSE
RESULTS_SEARCH_6_PARAMETERS_QUANT_TYPE_bias_correction	TRUE
RESULTS_SEARCH_6_PARAMETERS_QUANT_TYPE_keep_extreme_peptides_over_fraction	0
RESULTS_SEARCH_6_PARAMETERS_QUANT_TYPE_low_confidence_check	TRUE
RESULTS_SEARCH_6_PARAMETERS_QUANT_TYPE_low_intensity_check	TRUE
RESULTS_SEARCH_6_PARAMETERS_QUANT_TYPE_median_statistic	TRUE
RESULTS_SEARCH_6_PARAMETERS_QUANT_TYPE_mod_check	TRUE
RESULTS_SEARCH_6_PARAMETERS_QUANT_TYPE_quant_threshold	-1
RESULTS_SEARCH_6_PARAMETERS_QUANT_TYPE_quant_threshold_sn	9
RESULTS_SEARCH_6_PARAMETERS_QUANT_TYPE_separate_searches	FALSE
RESULTS_SEARCH_6_PARAMETERS_QUANT_TYPE_shared_msms_check	TRUE
RESULTS_SEARCH_6_PARAMETERS_PARAGON_METHOD_SETTINGS_UI_SAMPLE_TYPE	Identification
RESULTS_SEARCH_6_PARAMETERS_PARAGON_METHOD_SETTINGS_UI_CYS_ALKYLATION	Iodoacetamide
RESULTS_SEARCH_6_PARAMETERS_PARAGON_METHOD_SETTINGS_UI_DIGESTION	Trypsin
RESULTS_SEARCH_6_PARAMETERS_PARAGON_METHOD_SETTINGS_UI_INSTRUMENT	Orbi MS (1-3ppm), Orbi MS/MS
RESULTS_SEARCH_6_PARAMETERS_PARAGON_METHOD_SETTINGS_UI_SEARCH_EFFORT	Rapid
RESULTS_SEARCH_6_PARAMETERS_PARAGON_METHOD_SETTINGS_UI_USER_NAME	ESC308585\MSPF
RESULTS_SEARCH_6_PARAMETERS_PARAGON_METHOD_SETTINGS_UI_MACHINE_NAME	ESC308585
RESULTS_SEARCH_6_PARAMETERS_PARAGON_METHOD_SETTINGS_UI_SEARCH_ID	6.36965e+17
RESULTS_SEARCH_6_PARAMETERS_PARAGON_METHOD_SETTINGS_UI_START_TIME	2019-06-19 13:41:42
RESULTS_SEARCH_6_PARAMETERS_PARAGON_METHOD_SETTINGS_UI_MIN_UNUSED_PROTSCORE	0.0458
RESULTS_SEARCH_6_PARAMETERS_PARAGON_METHOD_SETTINGS_UI_PSPEP	TRUE
RESULTS_SEARCH_7_time_cpu	2118-06-06
RESULTS_SEARCH_7_time_duration	2119-01-22
RESULTS_SEARCH_7_version	5.0.2.5174
RESULTS_SEARCH_7_xml:id	SEARCH:1:636965485021443360_6
RESULTS_SEARCH_7_PARAMETERS_chemical_data_edited	FALSE
RESULTS_SEARCH_7_PARAMETERS_do_multiprecursor_search	TRUE
RESULTS_SEARCH_7_PARAMETERS_do_reverse_search	TRUE
RESULTS_SEARCH_7_PARAMETERS_max_quant_labels	35
RESULTS_SEARCH_7_PARAMETERS_maxresults	15
RESULTS_SEARCH_7_PARAMETERS_separate_searches	FALSE
RESULTS_SEARCH_7_PARAMETERS_MSTOLERANCE_type	dalton
RESULTS_SEARCH_7_PARAMETERS_MSTOLERANCE_value	0.05
RESULTS_SEARCH_7_PARAMETERS_MSMSTOLERANCE_type	dalton
RESULTS_SEARCH_7_PARAMETERS_MSMSTOLERANCE_value	0.1
RESULTS_SEARCH_7_PARAMETERS_MS_STANDARD_DEVIATION_type	dalton
RESULTS_SEARCH_7_PARAMETERS_MS_STANDARD_DEVIATION_value	0.0025
RESULTS_SEARCH_7_PARAMETERS_MSMS_STANDARD_DEVIATION_type	dalton
RESULTS_SEARCH_7_PARAMETERS_MSMS_STANDARD_DEVIATION_value	0.004
RESULTS_SEARCH_7_PARAMETERS_FASTA_filename	C:\AB SCIEX\ProteinPilot Data\SearchDatabases\2019_UP_Mouse_Con.fasta
RESULTS_SEARCH_7_PARAMETERS_AUTO_CALIBRATION_ms	TRUE
RESULTS_SEARCH_7_PARAMETERS_AUTO_CALIBRATION_msexport	FALSE
RESULTS_SEARCH_7_PARAMETERS_AUTO_CALIBRATION_msms	TRUE
RESULTS_SEARCH_7_PARAMETERS_AUTO_CALIBRATION_msmstolsdratio	3
RESULTS_SEARCH_7_PARAMETERS_AUTO_CALIBRATION_mstolsdratio	11
RESULTS_SEARCH_7_PARAMETERS_AUTO_CALIBRATION_squareroot	FALSE
RESULTS_SEARCH_7_PARAMETERS_AUTO_CALIBRATION_type	dalton
RESULTS_SEARCH_7_PARAMETERS_AUTO_CALIBRATION_MCP_d_s_s_f	0.0666667
RESULTS_SEARCH_7_PARAMETERS_AUTO_CALIBRATION_MCP_d_s_w_f	3
RESULTS_SEARCH_7_PARAMETERS_AUTO_CALIBRATION_MCP_m_f_r_mbc	200
RESULTS_SEARCH_7_PARAMETERS_AUTO_CALIBRATION_MCP_m_m_c	10
RESULTS_SEARCH_7_PARAMETERS_AUTO_CALIBRATION_MCP_m_m_f_s	0.25
RESULTS_SEARCH_7_PARAMETERS_AUTO_CALIBRATION_MCP_m_m_p_f	0.33
RESULTS_SEARCH_7_PARAMETERS_AUTO_CALIBRATION_MCP_m_m_p_rms_f	1
RESULTS_SEARCH_7_PARAMETERS_AUTO_CALIBRATION_MCP_m_p_t_f	1
RESULTS_SEARCH_7_PARAMETERS_AUTO_CALIBRATION_MCP_m_r_h_n_b	15
RESULTS_SEARCH_7_PARAMETERS_AUTO_CALIBRATION_MCP_m_z_n_s	99
RESULTS_SEARCH_7_PARAMETERS_AUTO_CALIBRATION_MCP_m_z_s_mn_f_r	0.0666667
RESULTS_SEARCH_7_PARAMETERS_AUTO_CALIBRATION_MCP_m_z_s_mx_f_r	0.1
RESULTS_SEARCH_7_PARAMETERS_MS_AUTO_CALIBRATION_OUT_avres	1.02233e-12
RESULTS_SEARCH_7_PARAMETERS_MS_AUTO_CALIBRATION_OUT_c0	0.000410799
RESULTS_SEARCH_7_PARAMETERS_MS_AUTO_CALIBRATION_OUT_c1minus1	-1.57971e-05
RESULTS_SEARCH_7_PARAMETERS_MS_AUTO_CALIBRATION_OUT_c2	0
RESULTS_SEARCH_7_PARAMETERS_MS_AUTO_CALIBRATION_OUT_file	2
RESULTS_SEARCH_7_PARAMETERS_MS_AUTO_CALIBRATION_OUT_partnumber	7
RESULTS_SEARCH_7_PARAMETERS_MS_AUTO_CALIBRATION_OUT_polyorder	1
RESULTS_SEARCH_7_PARAMETERS_MS_AUTO_CALIBRATION_OUT_sample	1
RESULTS_SEARCH_7_PARAMETERS_MS_AUTO_CALIBRATION_OUT_squareroot	FALSE
RESULTS_SEARCH_7_PARAMETERS_MSMS_AUTO_CALIBRATION_OUT_avres	2.55273e-12
RESULTS_SEARCH_7_PARAMETERS_MSMS_AUTO_CALIBRATION_OUT_c0	-0.00130921
RESULTS_SEARCH_7_PARAMETERS_MSMS_AUTO_CALIBRATION_OUT_c1minus1	-8.24328e-06
RESULTS_SEARCH_7_PARAMETERS_MSMS_AUTO_CALIBRATION_OUT_c2	0
RESULTS_SEARCH_7_PARAMETERS_MSMS_AUTO_CALIBRATION_OUT_file	2
RESULTS_SEARCH_7_PARAMETERS_MSMS_AUTO_CALIBRATION_OUT_partnumber	7
RESULTS_SEARCH_7_PARAMETERS_MSMS_AUTO_CALIBRATION_OUT_polyorder	1
RESULTS_SEARCH_7_PARAMETERS_MSMS_AUTO_CALIBRATION_OUT_sample	1
RESULTS_SEARCH_7_PARAMETERS_MSMS_AUTO_CALIBRATION_OUT_squareroot	FALSE
RESULTS_SEARCH_7_PARAMETERS_MAX_PRECURSORS_FRAGLET	5
RESULTS_SEARCH_7_PARAMETERS_MAX_PRECURSORS_TAGLET	1
RESULTS_SEARCH_7_PARAMETERS_PRECURSORS_DR_FRAGLET	10
RESULTS_SEARCH_7_PARAMETERS_PRECURSORS_DR_TAGLET	3
RESULTS_SEARCH_7_PARAMETERS_DEFAULT_CHARGE_STATE_1_charge	1
RESULTS_SEARCH_7_PARAMETERS_DEFAULT_CHARGE_STATE_1_probability	1
RESULTS_SEARCH_7_PARAMETERS_DEFAULT_CHARGE_STATE_2_charge	2
RESULTS_SEARCH_7_PARAMETERS_DEFAULT_CHARGE_STATE_2_probability	1
RESULTS_SEARCH_7_PARAMETERS_DEFAULT_CHARGE_STATE_3_charge	3
RESULTS_SEARCH_7_PARAMETERS_DEFAULT_CHARGE_STATE_3_probability	1
RESULTS_SEARCH_7_PARAMETERS_VERSION	5.0.2.0, 5346
RESULTS_SEARCH_7_PARAMETERS_PARAGON_VERSION	5.0.2.0, 5174
RESULTS_SEARCH_7_PARAMETERS_APPLICATION	ProteinPilot(tm) Software
RESULTS_SEARCH_7_PARAMETERS_PROGROUP_alternativedispositionmaximumfoldprobabilitydrop	100
RESULTS_SEARCH_7_PARAMETERS_PROGROUP_alternativedispositionmaximumfoldscoredrop	2
RESULTS_SEARCH_7_PARAMETERS_PROGROUP_autodiscordantpeptidethreshold	0.3
RESULTS_SEARCH_7_PARAMETERS_PROGROUP_bayesconfidencecalclulation	TRUE
RESULTS_SEARCH_7_PARAMETERS_PROGROUP_calibrateconfidence	TRUE
RESULTS_SEARCH_7_PARAMETERS_PROGROUP_compresspeptides	FALSE
RESULTS_SEARCH_7_PARAMETERS_PROGROUP_confidencepercentthresholdforexcludingothersfromquant	15
RESULTS_SEARCH_7_PARAMETERS_PROGROUP_confidencepercentthresholdforincludingselfinquant	15
RESULTS_SEARCH_7_PARAMETERS_PROGROUP_donotstoremspeaklists	FALSE
RESULTS_SEARCH_7_PARAMETERS_PROGROUP_fasta	C:\AB SCIEX\ProteinPilot Data\SearchDatabases\2019_UP_Mouse_Con.fasta
RESULTS_SEARCH_7_PARAMETERS_PROGROUP_featuregroupminpepconf	0.66
RESULTS_SEARCH_7_PARAMETERS_PROGROUP_featuregroupminups	0.47
RESULTS_SEARCH_7_PARAMETERS_PROGROUP_focusingintersection	4
RESULTS_SEARCH_7_PARAMETERS_PROGROUP_focusingminimummatchconfidence	0.1
RESULTS_SEARCH_7_PARAMETERS_PROGROUP_focusingminunusedprotscore	0.1
RESULTS_SEARCH_7_PARAMETERS_PROGROUP_focusingsubsetcutoff	6
RESULTS_SEARCH_7_PARAMETERS_PROGROUP_intersection	1.3
RESULTS_SEARCH_7_PARAMETERS_PROGROUP_minimummatchconfidencecutoff	0.001
RESULTS_SEARCH_7_PARAMETERS_PROGROUP_minunusedprotscore	0.0458
RESULTS_SEARCH_7_PARAMETERS_PROGROUP_subsetcutoff	2
RESULTS_SEARCH_7_PARAMETERS_PROGROUP_uniprotservicehttpssupported	TRUE
RESULTS_SEARCH_7_PARAMETERS_PROGROUP_unusedprotscorethresholdforexcludingothersfromquant	1.3
RESULTS_SEARCH_7_PARAMETERS_PEAKLIST_count	3920
RESULTS_SEARCH_7_PARAMETERS_PEAKLIST_filenumber	2
RESULTS_SEARCH_7_PARAMETERS_PEAKLIST_original_count	3920
RESULTS_SEARCH_7_PARAMETERS_PEAKLIST_originalfilename	C:\Data\Flores_Mirales\06202019\mus2\06172019_AFlor_Blad_2_A2.mgf
RESULTS_SEARCH_7_PARAMETERS_PEAKLIST_partnumber	7
RESULTS_SEARCH_7_PARAMETERS_QUANT_TYPE_background_correction	FALSE
RESULTS_SEARCH_7_PARAMETERS_QUANT_TYPE_bias_correction	TRUE
RESULTS_SEARCH_7_PARAMETERS_QUANT_TYPE_keep_extreme_peptides_over_fraction	0
RESULTS_SEARCH_7_PARAMETERS_QUANT_TYPE_low_confidence_check	TRUE
RESULTS_SEARCH_7_PARAMETERS_QUANT_TYPE_low_intensity_check	TRUE
RESULTS_SEARCH_7_PARAMETERS_QUANT_TYPE_median_statistic	TRUE
RESULTS_SEARCH_7_PARAMETERS_QUANT_TYPE_mod_check	TRUE
RESULTS_SEARCH_7_PARAMETERS_QUANT_TYPE_quant_threshold	-1
RESULTS_SEARCH_7_PARAMETERS_QUANT_TYPE_quant_threshold_sn	9
RESULTS_SEARCH_7_PARAMETERS_QUANT_TYPE_separate_searches	FALSE
RESULTS_SEARCH_7_PARAMETERS_QUANT_TYPE_shared_msms_check	TRUE
RESULTS_SEARCH_7_PARAMETERS_PARAGON_METHOD_SETTINGS_UI_SAMPLE_TYPE	Identification
RESULTS_SEARCH_7_PARAMETERS_PARAGON_METHOD_SETTINGS_UI_CYS_ALKYLATION	Iodoacetamide
RESULTS_SEARCH_7_PARAMETERS_PARAGON_METHOD_SETTINGS_UI_DIGESTION	Trypsin
RESULTS_SEARCH_7_PARAMETERS_PARAGON_METHOD_SETTINGS_UI_INSTRUMENT	Orbi MS (1-3ppm), Orbi MS/MS
RESULTS_SEARCH_7_PARAMETERS_PARAGON_METHOD_SETTINGS_UI_SEARCH_EFFORT	Rapid
RESULTS_SEARCH_7_PARAMETERS_PARAGON_METHOD_SETTINGS_UI_USER_NAME	ESC308585\MSPF
RESULTS_SEARCH_7_PARAMETERS_PARAGON_METHOD_SETTINGS_UI_MACHINE_NAME	ESC308585
RESULTS_SEARCH_7_PARAMETERS_PARAGON_METHOD_SETTINGS_UI_SEARCH_ID	6.36965e+17
RESULTS_SEARCH_7_PARAMETERS_PARAGON_METHOD_SETTINGS_UI_START_TIME	2019-06-19 13:41:42
RESULTS_SEARCH_7_PARAMETERS_PARAGON_METHOD_SETTINGS_UI_MIN_UNUSED_PROTSCORE	0.0458
RESULTS_SEARCH_7_PARAMETERS_PARAGON_METHOD_SETTINGS_UI_PSPEP	TRUE
RESULTS_SEARCH_8_time_cpu	96515
RESULTS_SEARCH_8_time_duration	96965
RESULTS_SEARCH_8_version	5.0.2.5174
RESULTS_SEARCH_8_xml:id	SEARCH:1:636965485021443360_7
RESULTS_SEARCH_8_PARAMETERS_chemical_data_edited	FALSE
RESULTS_SEARCH_8_PARAMETERS_do_multiprecursor_search	TRUE
RESULTS_SEARCH_8_PARAMETERS_do_reverse_search	TRUE
RESULTS_SEARCH_8_PARAMETERS_max_quant_labels	35
RESULTS_SEARCH_8_PARAMETERS_maxresults	15
RESULTS_SEARCH_8_PARAMETERS_separate_searches	FALSE
RESULTS_SEARCH_8_PARAMETERS_MSTOLERANCE_type	dalton
RESULTS_SEARCH_8_PARAMETERS_MSTOLERANCE_value	0.05
RESULTS_SEARCH_8_PARAMETERS_MSMSTOLERANCE_type	dalton
RESULTS_SEARCH_8_PARAMETERS_MSMSTOLERANCE_value	0.1
RESULTS_SEARCH_8_PARAMETERS_MS_STANDARD_DEVIATION_type	dalton
RESULTS_SEARCH_8_PARAMETERS_MS_STANDARD_DEVIATION_value	0.0025
RESULTS_SEARCH_8_PARAMETERS_MSMS_STANDARD_DEVIATION_type	dalton
RESULTS_SEARCH_8_PARAMETERS_MSMS_STANDARD_DEVIATION_value	0.004
RESULTS_SEARCH_8_PARAMETERS_FASTA_filename	C:\AB SCIEX\ProteinPilot Data\SearchDatabases\2019_UP_Mouse_Con.fasta
RESULTS_SEARCH_8_PARAMETERS_AUTO_CALIBRATION_ms	TRUE
RESULTS_SEARCH_8_PARAMETERS_AUTO_CALIBRATION_msexport	FALSE
RESULTS_SEARCH_8_PARAMETERS_AUTO_CALIBRATION_msms	TRUE
RESULTS_SEARCH_8_PARAMETERS_AUTO_CALIBRATION_msmstolsdratio	3
RESULTS_SEARCH_8_PARAMETERS_AUTO_CALIBRATION_mstolsdratio	11
RESULTS_SEARCH_8_PARAMETERS_AUTO_CALIBRATION_squareroot	FALSE
RESULTS_SEARCH_8_PARAMETERS_AUTO_CALIBRATION_type	dalton
RESULTS_SEARCH_8_PARAMETERS_AUTO_CALIBRATION_MCP_d_s_s_f	0.0666667
RESULTS_SEARCH_8_PARAMETERS_AUTO_CALIBRATION_MCP_d_s_w_f	3
RESULTS_SEARCH_8_PARAMETERS_AUTO_CALIBRATION_MCP_m_f_r_mbc	200
RESULTS_SEARCH_8_PARAMETERS_AUTO_CALIBRATION_MCP_m_m_c	10
RESULTS_SEARCH_8_PARAMETERS_AUTO_CALIBRATION_MCP_m_m_f_s	0.25
RESULTS_SEARCH_8_PARAMETERS_AUTO_CALIBRATION_MCP_m_m_p_f	0.33
RESULTS_SEARCH_8_PARAMETERS_AUTO_CALIBRATION_MCP_m_m_p_rms_f	1
RESULTS_SEARCH_8_PARAMETERS_AUTO_CALIBRATION_MCP_m_p_t_f	1
RESULTS_SEARCH_8_PARAMETERS_AUTO_CALIBRATION_MCP_m_r_h_n_b	15
RESULTS_SEARCH_8_PARAMETERS_AUTO_CALIBRATION_MCP_m_z_n_s	99
RESULTS_SEARCH_8_PARAMETERS_AUTO_CALIBRATION_MCP_m_z_s_mn_f_r	0.0666667
RESULTS_SEARCH_8_PARAMETERS_AUTO_CALIBRATION_MCP_m_z_s_mx_f_r	0.1
RESULTS_SEARCH_8_PARAMETERS_MS_AUTO_CALIBRATION_OUT_avres	-1.69379e-12
RESULTS_SEARCH_8_PARAMETERS_MS_AUTO_CALIBRATION_OUT_c0	-0.00108427
RESULTS_SEARCH_8_PARAMETERS_MS_AUTO_CALIBRATION_OUT_c1minus1	-1.31239e-05
RESULTS_SEARCH_8_PARAMETERS_MS_AUTO_CALIBRATION_OUT_c2	0
RESULTS_SEARCH_8_PARAMETERS_MS_AUTO_CALIBRATION_OUT_file	2
RESULTS_SEARCH_8_PARAMETERS_MS_AUTO_CALIBRATION_OUT_partnumber	8
RESULTS_SEARCH_8_PARAMETERS_MS_AUTO_CALIBRATION_OUT_polyorder	1
RESULTS_SEARCH_8_PARAMETERS_MS_AUTO_CALIBRATION_OUT_sample	1
RESULTS_SEARCH_8_PARAMETERS_MS_AUTO_CALIBRATION_OUT_squareroot	FALSE
RESULTS_SEARCH_8_PARAMETERS_MSMS_AUTO_CALIBRATION_OUT_avres	-2.44128e-13
RESULTS_SEARCH_8_PARAMETERS_MSMS_AUTO_CALIBRATION_OUT_c0	-0.00139602
RESULTS_SEARCH_8_PARAMETERS_MSMS_AUTO_CALIBRATION_OUT_c1minus1	-8.83e-06
RESULTS_SEARCH_8_PARAMETERS_MSMS_AUTO_CALIBRATION_OUT_c2	0
RESULTS_SEARCH_8_PARAMETERS_MSMS_AUTO_CALIBRATION_OUT_file	2
RESULTS_SEARCH_8_PARAMETERS_MSMS_AUTO_CALIBRATION_OUT_partnumber	8
RESULTS_SEARCH_8_PARAMETERS_MSMS_AUTO_CALIBRATION_OUT_polyorder	1
RESULTS_SEARCH_8_PARAMETERS_MSMS_AUTO_CALIBRATION_OUT_sample	1
RESULTS_SEARCH_8_PARAMETERS_MSMS_AUTO_CALIBRATION_OUT_squareroot	FALSE
RESULTS_SEARCH_8_PARAMETERS_MAX_PRECURSORS_FRAGLET	5
RESULTS_SEARCH_8_PARAMETERS_MAX_PRECURSORS_TAGLET	1
RESULTS_SEARCH_8_PARAMETERS_PRECURSORS_DR_FRAGLET	10
RESULTS_SEARCH_8_PARAMETERS_PRECURSORS_DR_TAGLET	3
RESULTS_SEARCH_8_PARAMETERS_DEFAULT_CHARGE_STATE_1_charge	1
RESULTS_SEARCH_8_PARAMETERS_DEFAULT_CHARGE_STATE_1_probability	1
RESULTS_SEARCH_8_PARAMETERS_DEFAULT_CHARGE_STATE_2_charge	2
RESULTS_SEARCH_8_PARAMETERS_DEFAULT_CHARGE_STATE_2_probability	1
RESULTS_SEARCH_8_PARAMETERS_DEFAULT_CHARGE_STATE_3_charge	3
RESULTS_SEARCH_8_PARAMETERS_DEFAULT_CHARGE_STATE_3_probability	1
RESULTS_SEARCH_8_PARAMETERS_VERSION	5.0.2.0, 5346
RESULTS_SEARCH_8_PARAMETERS_PARAGON_VERSION	5.0.2.0, 5174
RESULTS_SEARCH_8_PARAMETERS_APPLICATION	ProteinPilot(tm) Software
RESULTS_SEARCH_8_PARAMETERS_PROGROUP_alternativedispositionmaximumfoldprobabilitydrop	100
RESULTS_SEARCH_8_PARAMETERS_PROGROUP_alternativedispositionmaximumfoldscoredrop	1900-01-02
RESULTS_SEARCH_8_PARAMETERS_PROGROUP_autodiscordantpeptidethreshold	07:12:00
RESULTS_SEARCH_8_PARAMETERS_PROGROUP_bayesconfidencecalclulation	TRUE
RESULTS_SEARCH_8_PARAMETERS_PROGROUP_calibrateconfidence	TRUE
RESULTS_SEARCH_8_PARAMETERS_PROGROUP_compresspeptides	FALSE
RESULTS_SEARCH_8_PARAMETERS_PROGROUP_confidencepercentthresholdforexcludingothersfromquant	1900-01-15
RESULTS_SEARCH_8_PARAMETERS_PROGROUP_confidencepercentthresholdforincludingselfinquant	15
RESULTS_SEARCH_8_PARAMETERS_PROGROUP_donotstoremspeaklists	FALSE
RESULTS_SEARCH_8_PARAMETERS_PROGROUP_fasta	C:\AB SCIEX\ProteinPilot Data\SearchDatabases\2019_UP_Mouse_Con.fasta
RESULTS_SEARCH_8_PARAMETERS_PROGROUP_featuregroupminpepconf	0.66
RESULTS_SEARCH_8_PARAMETERS_PROGROUP_featuregroupminups	0.47
RESULTS_SEARCH_8_PARAMETERS_PROGROUP_focusingintersection	4
RESULTS_SEARCH_8_PARAMETERS_PROGROUP_focusingminimummatchconfidence	0.1
RESULTS_SEARCH_8_PARAMETERS_PROGROUP_focusingminunusedprotscore	0.1
RESULTS_SEARCH_8_PARAMETERS_PROGROUP_focusingsubsetcutoff	6
RESULTS_SEARCH_8_PARAMETERS_PROGROUP_intersection	1.3
RESULTS_SEARCH_8_PARAMETERS_PROGROUP_minimummatchconfidencecutoff	0.001
RESULTS_SEARCH_8_PARAMETERS_PROGROUP_minunusedprotscore	0.0458
RESULTS_SEARCH_8_PARAMETERS_PROGROUP_subsetcutoff	2
RESULTS_SEARCH_8_PARAMETERS_PROGROUP_uniprotservicehttpssupported	TRUE
RESULTS_SEARCH_8_PARAMETERS_PROGROUP_unusedprotscorethresholdforexcludingothersfromquant	1.3
RESULTS_SEARCH_8_PARAMETERS_PEAKLIST_count	3760
RESULTS_SEARCH_8_PARAMETERS_PEAKLIST_filenumber	2
RESULTS_SEARCH_8_PARAMETERS_PEAKLIST_original_count	3760
RESULTS_SEARCH_8_PARAMETERS_PEAKLIST_originalfilename	C:\Data\Flores_Mirales\06202019\mus2\06172019_AFlor_Blad_2_A2.mgf
RESULTS_SEARCH_8_PARAMETERS_PEAKLIST_partnumber	8
RESULTS_SEARCH_8_PARAMETERS_QUANT_TYPE_background_correction	FALSE
RESULTS_SEARCH_8_PARAMETERS_QUANT_TYPE_bias_correction	TRUE
RESULTS_SEARCH_8_PARAMETERS_QUANT_TYPE_keep_extreme_peptides_over_fraction	0
RESULTS_SEARCH_8_PARAMETERS_QUANT_TYPE_low_confidence_check	TRUE
RESULTS_SEARCH_8_PARAMETERS_QUANT_TYPE_low_intensity_check	TRUE
RESULTS_SEARCH_8_PARAMETERS_QUANT_TYPE_median_statistic	TRUE
RESULTS_SEARCH_8_PARAMETERS_QUANT_TYPE_mod_check	TRUE
RESULTS_SEARCH_8_PARAMETERS_QUANT_TYPE_quant_threshold	-1
RESULTS_SEARCH_8_PARAMETERS_QUANT_TYPE_quant_threshold_sn	9
RESULTS_SEARCH_8_PARAMETERS_QUANT_TYPE_separate_searches	FALSE
RESULTS_SEARCH_8_PARAMETERS_QUANT_TYPE_shared_msms_check	TRUE
RESULTS_SEARCH_8_PARAMETERS_PARAGON_METHOD_SETTINGS_UI_SAMPLE_TYPE	Identification
RESULTS_SEARCH_8_PARAMETERS_PARAGON_METHOD_SETTINGS_UI_CYS_ALKYLATION	Iodoacetamide
RESULTS_SEARCH_8_PARAMETERS_PARAGON_METHOD_SETTINGS_UI_DIGESTION	Trypsin
RESULTS_SEARCH_8_PARAMETERS_PARAGON_METHOD_SETTINGS_UI_INSTRUMENT	Orbi MS (1-3ppm), Orbi MS/MS
RESULTS_SEARCH_8_PARAMETERS_PARAGON_METHOD_SETTINGS_UI_SEARCH_EFFORT	Rapid
RESULTS_SEARCH_8_PARAMETERS_PARAGON_METHOD_SETTINGS_UI_USER_NAME	ESC308585\MSPF
RESULTS_SEARCH_8_PARAMETERS_PARAGON_METHOD_SETTINGS_UI_MACHINE_NAME	ESC308585
RESULTS_SEARCH_8_PARAMETERS_PARAGON_METHOD_SETTINGS_UI_SEARCH_ID	6.36965e+17
RESULTS_SEARCH_8_PARAMETERS_PARAGON_METHOD_SETTINGS_UI_START_TIME	2019-06-19 13:41:42
RESULTS_SEARCH_8_PARAMETERS_PARAGON_METHOD_SETTINGS_UI_MIN_UNUSED_PROTSCORE	0.0458
RESULTS_SEARCH_8_PARAMETERS_PARAGON_METHOD_SETTINGS_UI_PSPEP	TRUE
RESULTS_SEARCH_9_time_cpu	98359
RESULTS_SEARCH_9_time_duration	98673
RESULTS_SEARCH_9_version	5.0.2.5174
RESULTS_SEARCH_9_xml:id	SEARCH:1:636965485021443360_8
RESULTS_SEARCH_9_PARAMETERS_chemical_data_edited	FALSE
RESULTS_SEARCH_9_PARAMETERS_do_multiprecursor_search	TRUE
RESULTS_SEARCH_9_PARAMETERS_do_reverse_search	TRUE
RESULTS_SEARCH_9_PARAMETERS_max_quant_labels	35
RESULTS_SEARCH_9_PARAMETERS_maxresults	15
RESULTS_SEARCH_9_PARAMETERS_separate_searches	FALSE
RESULTS_SEARCH_9_PARAMETERS_MSTOLERANCE_type	dalton
RESULTS_SEARCH_9_PARAMETERS_MSTOLERANCE_value	0.05
RESULTS_SEARCH_9_PARAMETERS_MSMSTOLERANCE_type	dalton
RESULTS_SEARCH_9_PARAMETERS_MSMSTOLERANCE_value	0.1
RESULTS_SEARCH_9_PARAMETERS_MS_STANDARD_DEVIATION_type	dalton
RESULTS_SEARCH_9_PARAMETERS_MS_STANDARD_DEVIATION_value	0.0025
RESULTS_SEARCH_9_PARAMETERS_MSMS_STANDARD_DEVIATION_type	dalton
RESULTS_SEARCH_9_PARAMETERS_MSMS_STANDARD_DEVIATION_value	0.004
RESULTS_SEARCH_9_PARAMETERS_FASTA_filename	C:\AB SCIEX\ProteinPilot Data\SearchDatabases\2019_UP_Mouse_Con.fasta
RESULTS_SEARCH_9_PARAMETERS_AUTO_CALIBRATION_ms	TRUE
RESULTS_SEARCH_9_PARAMETERS_AUTO_CALIBRATION_msexport	FALSE
RESULTS_SEARCH_9_PARAMETERS_AUTO_CALIBRATION_msms	TRUE
RESULTS_SEARCH_9_PARAMETERS_AUTO_CALIBRATION_msmstolsdratio	3
RESULTS_SEARCH_9_PARAMETERS_AUTO_CALIBRATION_mstolsdratio	11
RESULTS_SEARCH_9_PARAMETERS_AUTO_CALIBRATION_squareroot	FALSE
RESULTS_SEARCH_9_PARAMETERS_AUTO_CALIBRATION_type	dalton
RESULTS_SEARCH_9_PARAMETERS_AUTO_CALIBRATION_MCP_d_s_s_f	0.0666667
RESULTS_SEARCH_9_PARAMETERS_AUTO_CALIBRATION_MCP_d_s_w_f	3
RESULTS_SEARCH_9_PARAMETERS_AUTO_CALIBRATION_MCP_m_f_r_mbc	200
RESULTS_SEARCH_9_PARAMETERS_AUTO_CALIBRATION_MCP_m_m_c	10
RESULTS_SEARCH_9_PARAMETERS_AUTO_CALIBRATION_MCP_m_m_f_s	0.25
RESULTS_SEARCH_9_PARAMETERS_AUTO_CALIBRATION_MCP_m_m_p_f	0.33
RESULTS_SEARCH_9_PARAMETERS_AUTO_CALIBRATION_MCP_m_m_p_rms_f	1
RESULTS_SEARCH_9_PARAMETERS_AUTO_CALIBRATION_MCP_m_p_t_f	1
RESULTS_SEARCH_9_PARAMETERS_AUTO_CALIBRATION_MCP_m_r_h_n_b	15
RESULTS_SEARCH_9_PARAMETERS_AUTO_CALIBRATION_MCP_m_z_n_s	99
RESULTS_SEARCH_9_PARAMETERS_AUTO_CALIBRATION_MCP_m_z_s_mn_f_r	0.0666667
RESULTS_SEARCH_9_PARAMETERS_AUTO_CALIBRATION_MCP_m_z_s_mx_f_r	0.1
RESULTS_SEARCH_9_PARAMETERS_MS_AUTO_CALIBRATION_OUT_avres	1.34726e-12
RESULTS_SEARCH_9_PARAMETERS_MS_AUTO_CALIBRATION_OUT_c0	-0.0010351
RESULTS_SEARCH_9_PARAMETERS_MS_AUTO_CALIBRATION_OUT_c1minus1	-1.30197e-05
RESULTS_SEARCH_9_PARAMETERS_MS_AUTO_CALIBRATION_OUT_c2	0
RESULTS_SEARCH_9_PARAMETERS_MS_AUTO_CALIBRATION_OUT_file	2
RESULTS_SEARCH_9_PARAMETERS_MS_AUTO_CALIBRATION_OUT_partnumber	9
RESULTS_SEARCH_9_PARAMETERS_MS_AUTO_CALIBRATION_OUT_polyorder	1
RESULTS_SEARCH_9_PARAMETERS_MS_AUTO_CALIBRATION_OUT_sample	1900-01-01
RESULTS_SEARCH_9_PARAMETERS_MS_AUTO_CALIBRATION_OUT_squareroot	FALSE
RESULTS_SEARCH_9_PARAMETERS_MSMS_AUTO_CALIBRATION_OUT_avres	3.13903e-12
RESULTS_SEARCH_9_PARAMETERS_MSMS_AUTO_CALIBRATION_OUT_c0	-0.00157648
RESULTS_SEARCH_9_PARAMETERS_MSMS_AUTO_CALIBRATION_OUT_c1minus1	-8.80932e-06
RESULTS_SEARCH_9_PARAMETERS_MSMS_AUTO_CALIBRATION_OUT_c2	0
RESULTS_SEARCH_9_PARAMETERS_MSMS_AUTO_CALIBRATION_OUT_file	2
RESULTS_SEARCH_9_PARAMETERS_MSMS_AUTO_CALIBRATION_OUT_partnumber	9
RESULTS_SEARCH_9_PARAMETERS_MSMS_AUTO_CALIBRATION_OUT_polyorder	1
RESULTS_SEARCH_9_PARAMETERS_MSMS_AUTO_CALIBRATION_OUT_sample	1
RESULTS_SEARCH_9_PARAMETERS_MSMS_AUTO_CALIBRATION_OUT_squareroot	FALSE
RESULTS_SEARCH_9_PARAMETERS_MAX_PRECURSORS_FRAGLET	5
RESULTS_SEARCH_9_PARAMETERS_MAX_PRECURSORS_TAGLET	1
RESULTS_SEARCH_9_PARAMETERS_PRECURSORS_DR_FRAGLET	10
RESULTS_SEARCH_9_PARAMETERS_PRECURSORS_DR_TAGLET	3
RESULTS_SEARCH_9_PARAMETERS_DEFAULT_CHARGE_STATE_1_charge	1
RESULTS_SEARCH_9_PARAMETERS_DEFAULT_CHARGE_STATE_1_probability	1
RESULTS_SEARCH_9_PARAMETERS_DEFAULT_CHARGE_STATE_2_charge	2
RESULTS_SEARCH_9_PARAMETERS_DEFAULT_CHARGE_STATE_2_probability	1
RESULTS_SEARCH_9_PARAMETERS_DEFAULT_CHARGE_STATE_3_charge	3
RESULTS_SEARCH_9_PARAMETERS_DEFAULT_CHARGE_STATE_3_probability	1
RESULTS_SEARCH_9_PARAMETERS_VERSION	5.0.2.0, 5346
RESULTS_SEARCH_9_PARAMETERS_PARAGON_VERSION	5.0.2.0, 5174
RESULTS_SEARCH_9_PARAMETERS_APPLICATION	ProteinPilot(tm) Software
RESULTS_SEARCH_9_PARAMETERS_PROGROUP_alternativedispositionmaximumfoldprobabilitydrop	100
RESULTS_SEARCH_9_PARAMETERS_PROGROUP_alternativedispositionmaximumfoldscoredrop	2
RESULTS_SEARCH_9_PARAMETERS_PROGROUP_autodiscordantpeptidethreshold	0.3
RESULTS_SEARCH_9_PARAMETERS_PROGROUP_bayesconfidencecalclulation	TRUE
RESULTS_SEARCH_9_PARAMETERS_PROGROUP_calibrateconfidence	TRUE
RESULTS_SEARCH_9_PARAMETERS_PROGROUP_compresspeptides	FALSE
RESULTS_SEARCH_9_PARAMETERS_PROGROUP_confidencepercentthresholdforexcludingothersfromquant	15
RESULTS_SEARCH_9_PARAMETERS_PROGROUP_confidencepercentthresholdforincludingselfinquant	15
RESULTS_SEARCH_9_PARAMETERS_PROGROUP_donotstoremspeaklists	FALSE
RESULTS_SEARCH_9_PARAMETERS_PROGROUP_fasta	C:\AB SCIEX\ProteinPilot Data\SearchDatabases\2019_UP_Mouse_Con.fasta
RESULTS_SEARCH_9_PARAMETERS_PROGROUP_featuregroupminpepconf	0.66
RESULTS_SEARCH_9_PARAMETERS_PROGROUP_featuregroupminups	0.47
RESULTS_SEARCH_9_PARAMETERS_PROGROUP_focusingintersection	4
RESULTS_SEARCH_9_PARAMETERS_PROGROUP_focusingminimummatchconfidence	0.1
RESULTS_SEARCH_9_PARAMETERS_PROGROUP_focusingminunusedprotscore	0.1
RESULTS_SEARCH_9_PARAMETERS_PROGROUP_focusingsubsetcutoff	6
RESULTS_SEARCH_9_PARAMETERS_PROGROUP_intersection	1.3
RESULTS_SEARCH_9_PARAMETERS_PROGROUP_minimummatchconfidencecutoff	0.001
RESULTS_SEARCH_9_PARAMETERS_PROGROUP_minunusedprotscore	0.0458
RESULTS_SEARCH_9_PARAMETERS_PROGROUP_subsetcutoff	2
RESULTS_SEARCH_9_PARAMETERS_PROGROUP_uniprotservicehttpssupported	TRUE
RESULTS_SEARCH_9_PARAMETERS_PROGROUP_unusedprotscorethresholdforexcludingothersfromquant	1.3
RESULTS_SEARCH_9_PARAMETERS_PEAKLIST_count	1908-10-27
RESULTS_SEARCH_9_PARAMETERS_PEAKLIST_filenumber	2
RESULTS_SEARCH_9_PARAMETERS_PEAKLIST_original_count	3223
RESULTS_SEARCH_9_PARAMETERS_PEAKLIST_originalfilename	C:\Data\Flores_Mirales\06202019\mus2\06172019_AFlor_Blad_2_A2.mgf
RESULTS_SEARCH_9_PARAMETERS_PEAKLIST_partnumber	9
RESULTS_SEARCH_9_PARAMETERS_QUANT_TYPE_background_correction	FALSE
RESULTS_SEARCH_9_PARAMETERS_QUANT_TYPE_bias_correction	TRUE
RESULTS_SEARCH_9_PARAMETERS_QUANT_TYPE_keep_extreme_peptides_over_fraction	0
RESULTS_SEARCH_9_PARAMETERS_QUANT_TYPE_low_confidence_check	TRUE
RESULTS_SEARCH_9_PARAMETERS_QUANT_TYPE_low_intensity_check	TRUE
RESULTS_SEARCH_9_PARAMETERS_QUANT_TYPE_median_statistic	TRUE
RESULTS_SEARCH_9_PARAMETERS_QUANT_TYPE_mod_check	TRUE
RESULTS_SEARCH_9_PARAMETERS_QUANT_TYPE_quant_threshold	-1
RESULTS_SEARCH_9_PARAMETERS_QUANT_TYPE_quant_threshold_sn	9
RESULTS_SEARCH_9_PARAMETERS_QUANT_TYPE_separate_searches	FALSE
RESULTS_SEARCH_9_PARAMETERS_QUANT_TYPE_shared_msms_check	TRUE
RESULTS_SEARCH_9_PARAMETERS_PARAGON_METHOD_SETTINGS_UI_SAMPLE_TYPE	Identification
RESULTS_SEARCH_9_PARAMETERS_PARAGON_METHOD_SETTINGS_UI_CYS_ALKYLATION	Iodoacetamide
RESULTS_SEARCH_9_PARAMETERS_PARAGON_METHOD_SETTINGS_UI_DIGESTION	Trypsin
RESULTS_SEARCH_9_PARAMETERS_PARAGON_METHOD_SETTINGS_UI_INSTRUMENT	Orbi MS (1-3ppm), Orbi MS/MS
RESULTS_SEARCH_9_PARAMETERS_PARAGON_METHOD_SETTINGS_UI_SEARCH_EFFORT	Rapid
RESULTS_SEARCH_9_PARAMETERS_PARAGON_METHOD_SETTINGS_UI_USER_NAME	ESC308585\MSPF
RESULTS_SEARCH_9_PARAMETERS_PARAGON_METHOD_SETTINGS_UI_MACHINE_NAME	ESC308585
RESULTS_SEARCH_9_PARAMETERS_PARAGON_METHOD_SETTINGS_UI_SEARCH_ID	#VALUE!
RESULTS_SEARCH_9_PARAMETERS_PARAGON_METHOD_SETTINGS_UI_START_TIME	2019-06-19 13:41:42
RESULTS_SEARCH_9_PARAMETERS_PARAGON_METHOD_SETTINGS_UI_MIN_UNUSED_PROTSCORE	0.0458
RESULTS_SEARCH_9_PARAMETERS_PARAGON_METHOD_SETTINGS_UI_PSPEP	TRUE
RESULTS_SEARCH_10_time_cpu	97421
RESULTS_SEARCH_10_time_duration	97654
RESULTS_SEARCH_10_version	5.0.2.5174
RESULTS_SEARCH_10_xml:id	SEARCH:1:636965485021443360_9
RESULTS_SEARCH_10_PARAMETERS_chemical_data_edited	FALSE
RESULTS_SEARCH_10_PARAMETERS_do_multiprecursor_search	TRUE
RESULTS_SEARCH_10_PARAMETERS_do_reverse_search	TRUE
RESULTS_SEARCH_10_PARAMETERS_max_quant_labels	35
RESULTS_SEARCH_10_PARAMETERS_maxresults	15
RESULTS_SEARCH_10_PARAMETERS_separate_searches	FALSE
RESULTS_SEARCH_10_PARAMETERS_MSTOLERANCE_type	dalton
RESULTS_SEARCH_10_PARAMETERS_MSTOLERANCE_value	0.05
RESULTS_SEARCH_10_PARAMETERS_MSMSTOLERANCE_type	dalton
RESULTS_SEARCH_10_PARAMETERS_MSMSTOLERANCE_value	0.1
RESULTS_SEARCH_10_PARAMETERS_MS_STANDARD_DEVIATION_type	dalton
RESULTS_SEARCH_10_PARAMETERS_MS_STANDARD_DEVIATION_value	0.0025
RESULTS_SEARCH_10_PARAMETERS_MSMS_STANDARD_DEVIATION_type	dalton
RESULTS_SEARCH_10_PARAMETERS_MSMS_STANDARD_DEVIATION_value	0.004
RESULTS_SEARCH_10_PARAMETERS_FASTA_filename	C:\AB SCIEX\ProteinPilot Data\SearchDatabases\2019_UP_Mouse_Con.fasta
RESULTS_SEARCH_10_PARAMETERS_AUTO_CALIBRATION_ms	TRUE
RESULTS_SEARCH_10_PARAMETERS_AUTO_CALIBRATION_msexport	FALSE
RESULTS_SEARCH_10_PARAMETERS_AUTO_CALIBRATION_msms	TRUE
RESULTS_SEARCH_10_PARAMETERS_AUTO_CALIBRATION_msmstolsdratio	3
RESULTS_SEARCH_10_PARAMETERS_AUTO_CALIBRATION_mstolsdratio	11
RESULTS_SEARCH_10_PARAMETERS_AUTO_CALIBRATION_squareroot	FALSE
RESULTS_SEARCH_10_PARAMETERS_AUTO_CALIBRATION_type	dalton
RESULTS_SEARCH_10_PARAMETERS_AUTO_CALIBRATION_MCP_d_s_s_f	0.0666667
RESULTS_SEARCH_10_PARAMETERS_AUTO_CALIBRATION_MCP_d_s_w_f	3
RESULTS_SEARCH_10_PARAMETERS_AUTO_CALIBRATION_MCP_m_f_r_mbc	200
RESULTS_SEARCH_10_PARAMETERS_AUTO_CALIBRATION_MCP_m_m_c	10
RESULTS_SEARCH_10_PARAMETERS_AUTO_CALIBRATION_MCP_m_m_f_s	0.25
RESULTS_SEARCH_10_PARAMETERS_AUTO_CALIBRATION_MCP_m_m_p_f	0.33
RESULTS_SEARCH_10_PARAMETERS_AUTO_CALIBRATION_MCP_m_m_p_rms_f	1
RESULTS_SEARCH_10_PARAMETERS_AUTO_CALIBRATION_MCP_m_p_t_f	1
RESULTS_SEARCH_10_PARAMETERS_AUTO_CALIBRATION_MCP_m_r_h_n_b	15
RESULTS_SEARCH_10_PARAMETERS_AUTO_CALIBRATION_MCP_m_z_n_s	99
RESULTS_SEARCH_10_PARAMETERS_AUTO_CALIBRATION_MCP_m_z_s_mn_f_r	0.0666667
RESULTS_SEARCH_10_PARAMETERS_AUTO_CALIBRATION_MCP_m_z_s_mx_f_r	0.1
RESULTS_SEARCH_10_PARAMETERS_MS_AUTO_CALIBRATION_OUT_avres	2.60283e-13
RESULTS_SEARCH_10_PARAMETERS_MS_AUTO_CALIBRATION_OUT_c0	-0.000243973
RESULTS_SEARCH_10_PARAMETERS_MS_AUTO_CALIBRATION_OUT_c1minus1	-1.41218e-05
RESULTS_SEARCH_10_PARAMETERS_MS_AUTO_CALIBRATION_OUT_c2	0
RESULTS_SEARCH_10_PARAMETERS_MS_AUTO_CALIBRATION_OUT_file	2
RESULTS_SEARCH_10_PARAMETERS_MS_AUTO_CALIBRATION_OUT_partnumber	10
RESULTS_SEARCH_10_PARAMETERS_MS_AUTO_CALIBRATION_OUT_polyorder	1
RESULTS_SEARCH_10_PARAMETERS_MS_AUTO_CALIBRATION_OUT_sample	1
RESULTS_SEARCH_10_PARAMETERS_MS_AUTO_CALIBRATION_OUT_squareroot	FALSE
RESULTS_SEARCH_10_PARAMETERS_MSMS_AUTO_CALIBRATION_OUT_avres	3.01797e-12
RESULTS_SEARCH_10_PARAMETERS_MSMS_AUTO_CALIBRATION_OUT_c0	-0.00159901
RESULTS_SEARCH_10_PARAMETERS_MSMS_AUTO_CALIBRATION_OUT_c1minus1	-9.3555e-06
RESULTS_SEARCH_10_PARAMETERS_MSMS_AUTO_CALIBRATION_OUT_c2	0
RESULTS_SEARCH_10_PARAMETERS_MSMS_AUTO_CALIBRATION_OUT_file	2
RESULTS_SEARCH_10_PARAMETERS_MSMS_AUTO_CALIBRATION_OUT_partnumber	10
RESULTS_SEARCH_10_PARAMETERS_MSMS_AUTO_CALIBRATION_OUT_polyorder	1
RESULTS_SEARCH_10_PARAMETERS_MSMS_AUTO_CALIBRATION_OUT_sample	1
RESULTS_SEARCH_10_PARAMETERS_MSMS_AUTO_CALIBRATION_OUT_squareroot	FALSE
RESULTS_SEARCH_10_PARAMETERS_MAX_PRECURSORS_FRAGLET	5
RESULTS_SEARCH_10_PARAMETERS_MAX_PRECURSORS_TAGLET	1
RESULTS_SEARCH_10_PARAMETERS_PRECURSORS_DR_FRAGLET	10
RESULTS_SEARCH_10_PARAMETERS_PRECURSORS_DR_TAGLET	3
RESULTS_SEARCH_10_PARAMETERS_DEFAULT_CHARGE_STATE_1_charge	1
RESULTS_SEARCH_10_PARAMETERS_DEFAULT_CHARGE_STATE_1_probability	1
RESULTS_SEARCH_10_PARAMETERS_DEFAULT_CHARGE_STATE_2_charge	2
RESULTS_SEARCH_10_PARAMETERS_DEFAULT_CHARGE_STATE_2_probability	1
RESULTS_SEARCH_10_PARAMETERS_DEFAULT_CHARGE_STATE_3_charge	3
RESULTS_SEARCH_10_PARAMETERS_DEFAULT_CHARGE_STATE_3_probability	1
RESULTS_SEARCH_10_PARAMETERS_VERSION	5.0.2.0, 5346
RESULTS_SEARCH_10_PARAMETERS_PARAGON_VERSION	5.0.2.0, 5174
RESULTS_SEARCH_10_PARAMETERS_APPLICATION	ProteinPilot(tm) Software
RESULTS_SEARCH_10_PARAMETERS_PROGROUP_alternativedispositionmaximumfoldprobabilitydrop	100
RESULTS_SEARCH_10_PARAMETERS_PROGROUP_alternativedispositionmaximumfoldscoredrop	2
RESULTS_SEARCH_10_PARAMETERS_PROGROUP_autodiscordantpeptidethreshold	0.3
RESULTS_SEARCH_10_PARAMETERS_PROGROUP_bayesconfidencecalclulation	TRUE
RESULTS_SEARCH_10_PARAMETERS_PROGROUP_calibrateconfidence	TRUE
RESULTS_SEARCH_10_PARAMETERS_PROGROUP_compresspeptides	FALSE
RESULTS_SEARCH_10_PARAMETERS_PROGROUP_confidencepercentthresholdforexcludingothersfromquant	15
RESULTS_SEARCH_10_PARAMETERS_PROGROUP_confidencepercentthresholdforincludingselfinquant	1900-01-15
RESULTS_SEARCH_10_PARAMETERS_PROGROUP_donotstoremspeaklists	FALSE
RESULTS_SEARCH_10_PARAMETERS_PROGROUP_fasta	C:\AB SCIEX\ProteinPilot Data\SearchDatabases\2019_UP_Mouse_Con.fasta
RESULTS_SEARCH_10_PARAMETERS_PROGROUP_featuregroupminpepconf	0.66
RESULTS_SEARCH_10_PARAMETERS_PROGROUP_featuregroupminups	0.47
RESULTS_SEARCH_10_PARAMETERS_PROGROUP_focusingintersection	4
RESULTS_SEARCH_10_PARAMETERS_PROGROUP_focusingminimummatchconfidence	0.1
RESULTS_SEARCH_10_PARAMETERS_PROGROUP_focusingminunusedprotscore	0.1
RESULTS_SEARCH_10_PARAMETERS_PROGROUP_focusingsubsetcutoff	6
RESULTS_SEARCH_10_PARAMETERS_PROGROUP_intersection	1.3
RESULTS_SEARCH_10_PARAMETERS_PROGROUP_minimummatchconfidencecutoff	0.001
RESULTS_SEARCH_10_PARAMETERS_PROGROUP_minunusedprotscore	0.0458
RESULTS_SEARCH_10_PARAMETERS_PROGROUP_subsetcutoff	2
RESULTS_SEARCH_10_PARAMETERS_PROGROUP_uniprotservicehttpssupported	TRUE
RESULTS_SEARCH_10_PARAMETERS_PROGROUP_unusedprotscorethresholdforexcludingothersfromquant	1.3
RESULTS_SEARCH_10_PARAMETERS_PEAKLIST_count	1909-08-25
RESULTS_SEARCH_10_PARAMETERS_PEAKLIST_filenumber	2
RESULTS_SEARCH_10_PARAMETERS_PEAKLIST_original_count	3525
RESULTS_SEARCH_10_PARAMETERS_PEAKLIST_originalfilename	C:\Data\Flores_Mirales\06202019\mus2\06172019_AFlor_Blad_2_A2.mgf
RESULTS_SEARCH_10_PARAMETERS_PEAKLIST_partnumber	10
RESULTS_SEARCH_10_PARAMETERS_QUANT_TYPE_background_correction	FALSE
RESULTS_SEARCH_10_PARAMETERS_QUANT_TYPE_bias_correction	TRUE
RESULTS_SEARCH_10_PARAMETERS_QUANT_TYPE_keep_extreme_peptides_over_fraction	0
RESULTS_SEARCH_10_PARAMETERS_QUANT_TYPE_low_confidence_check	TRUE
RESULTS_SEARCH_10_PARAMETERS_QUANT_TYPE_low_intensity_check	TRUE
RESULTS_SEARCH_10_PARAMETERS_QUANT_TYPE_median_statistic	TRUE
RESULTS_SEARCH_10_PARAMETERS_QUANT_TYPE_mod_check	TRUE
RESULTS_SEARCH_10_PARAMETERS_QUANT_TYPE_quant_threshold	-1
RESULTS_SEARCH_10_PARAMETERS_QUANT_TYPE_quant_threshold_sn	9
RESULTS_SEARCH_10_PARAMETERS_QUANT_TYPE_separate_searches	FALSE
RESULTS_SEARCH_10_PARAMETERS_QUANT_TYPE_shared_msms_check	TRUE
RESULTS_SEARCH_10_PARAMETERS_PARAGON_METHOD_SETTINGS_UI_SAMPLE_TYPE	Identification
RESULTS_SEARCH_10_PARAMETERS_PARAGON_METHOD_SETTINGS_UI_CYS_ALKYLATION	Iodoacetamide
RESULTS_SEARCH_10_PARAMETERS_PARAGON_METHOD_SETTINGS_UI_DIGESTION	Trypsin
RESULTS_SEARCH_10_PARAMETERS_PARAGON_METHOD_SETTINGS_UI_INSTRUMENT	Orbi MS (1-3ppm), Orbi MS/MS
RESULTS_SEARCH_10_PARAMETERS_PARAGON_METHOD_SETTINGS_UI_SEARCH_EFFORT	Rapid
RESULTS_SEARCH_10_PARAMETERS_PARAGON_METHOD_SETTINGS_UI_USER_NAME	ESC308585\MSPF
RESULTS_SEARCH_10_PARAMETERS_PARAGON_METHOD_SETTINGS_UI_MACHINE_NAME	ESC308585
RESULTS_SEARCH_10_PARAMETERS_PARAGON_METHOD_SETTINGS_UI_SEARCH_ID	6.36965e+17
RESULTS_SEARCH_10_PARAMETERS_PARAGON_METHOD_SETTINGS_UI_START_TIME	2019-06-19 13:41:42
RESULTS_SEARCH_10_PARAMETERS_PARAGON_METHOD_SETTINGS_UI_MIN_UNUSED_PROTSCORE	0.0458
RESULTS_SEARCH_10_PARAMETERS_PARAGON_METHOD_SETTINGS_UI_PSPEP	TRUE
RESULTS_SEARCH_11_time_cpu	94390
RESULTS_SEARCH_11_time_duration	94610
RESULTS_SEARCH_11_version	5.0.2.5174
RESULTS_SEARCH_11_xml:id	SEARCH:1:636965485021443360_10
RESULTS_SEARCH_11_PARAMETERS_chemical_data_edited	FALSE
RESULTS_SEARCH_11_PARAMETERS_do_multiprecursor_search	TRUE
RESULTS_SEARCH_11_PARAMETERS_do_reverse_search	TRUE
RESULTS_SEARCH_11_PARAMETERS_max_quant_labels	35
RESULTS_SEARCH_11_PARAMETERS_maxresults	15
RESULTS_SEARCH_11_PARAMETERS_separate_searches	FALSE
RESULTS_SEARCH_11_PARAMETERS_MSTOLERANCE_type	dalton
RESULTS_SEARCH_11_PARAMETERS_MSTOLERANCE_value	0.05
RESULTS_SEARCH_11_PARAMETERS_MSMSTOLERANCE_type	dalton
RESULTS_SEARCH_11_PARAMETERS_MSMSTOLERANCE_value	0.1
RESULTS_SEARCH_11_PARAMETERS_MS_STANDARD_DEVIATION_type	dalton
RESULTS_SEARCH_11_PARAMETERS_MS_STANDARD_DEVIATION_value	0.0025
RESULTS_SEARCH_11_PARAMETERS_MSMS_STANDARD_DEVIATION_type	dalton
RESULTS_SEARCH_11_PARAMETERS_MSMS_STANDARD_DEVIATION_value	0.004
RESULTS_SEARCH_11_PARAMETERS_FASTA_filename	C:\AB SCIEX\ProteinPilot Data\SearchDatabases\2019_UP_Mouse_Con.fasta
RESULTS_SEARCH_11_PARAMETERS_AUTO_CALIBRATION_ms	TRUE
RESULTS_SEARCH_11_PARAMETERS_AUTO_CALIBRATION_msexport	FALSE
RESULTS_SEARCH_11_PARAMETERS_AUTO_CALIBRATION_msms	TRUE
RESULTS_SEARCH_11_PARAMETERS_AUTO_CALIBRATION_msmstolsdratio	3
RESULTS_SEARCH_11_PARAMETERS_AUTO_CALIBRATION_mstolsdratio	11
RESULTS_SEARCH_11_PARAMETERS_AUTO_CALIBRATION_squareroot	FALSE
RESULTS_SEARCH_11_PARAMETERS_AUTO_CALIBRATION_type	dalton
RESULTS_SEARCH_11_PARAMETERS_AUTO_CALIBRATION_MCP_d_s_s_f	0.0666667
RESULTS_SEARCH_11_PARAMETERS_AUTO_CALIBRATION_MCP_d_s_w_f	3
RESULTS_SEARCH_11_PARAMETERS_AUTO_CALIBRATION_MCP_m_f_r_mbc	200
RESULTS_SEARCH_11_PARAMETERS_AUTO_CALIBRATION_MCP_m_m_c	10
RESULTS_SEARCH_11_PARAMETERS_AUTO_CALIBRATION_MCP_m_m_f_s	0.25
RESULTS_SEARCH_11_PARAMETERS_AUTO_CALIBRATION_MCP_m_m_p_f	0.33
RESULTS_SEARCH_11_PARAMETERS_AUTO_CALIBRATION_MCP_m_m_p_rms_f	1
RESULTS_SEARCH_11_PARAMETERS_AUTO_CALIBRATION_MCP_m_p_t_f	1
RESULTS_SEARCH_11_PARAMETERS_AUTO_CALIBRATION_MCP_m_r_h_n_b	15
RESULTS_SEARCH_11_PARAMETERS_AUTO_CALIBRATION_MCP_m_z_n_s	99
RESULTS_SEARCH_11_PARAMETERS_AUTO_CALIBRATION_MCP_m_z_s_mn_f_r	0.0666667
RESULTS_SEARCH_11_PARAMETERS_AUTO_CALIBRATION_MCP_m_z_s_mx_f_r	0.1
RESULTS_SEARCH_11_PARAMETERS_MS_AUTO_CALIBRATION_OUT_avres	6.2011e-13
RESULTS_SEARCH_11_PARAMETERS_MS_AUTO_CALIBRATION_OUT_c0	-0.00125813
RESULTS_SEARCH_11_PARAMETERS_MS_AUTO_CALIBRATION_OUT_c1minus1	-1.30099e-05
RESULTS_SEARCH_11_PARAMETERS_MS_AUTO_CALIBRATION_OUT_c2	0
RESULTS_SEARCH_11_PARAMETERS_MS_AUTO_CALIBRATION_OUT_file	2
RESULTS_SEARCH_11_PARAMETERS_MS_AUTO_CALIBRATION_OUT_partnumber	11
RESULTS_SEARCH_11_PARAMETERS_MS_AUTO_CALIBRATION_OUT_polyorder	1
RESULTS_SEARCH_11_PARAMETERS_MS_AUTO_CALIBRATION_OUT_sample	1
RESULTS_SEARCH_11_PARAMETERS_MS_AUTO_CALIBRATION_OUT_squareroot	FALSE
RESULTS_SEARCH_11_PARAMETERS_MSMS_AUTO_CALIBRATION_OUT_avres	4.24847e-13
RESULTS_SEARCH_11_PARAMETERS_MSMS_AUTO_CALIBRATION_OUT_c0	-0.00316517
RESULTS_SEARCH_11_PARAMETERS_MSMS_AUTO_CALIBRATION_OUT_c1minus1	-6.36254e-06
RESULTS_SEARCH_11_PARAMETERS_MSMS_AUTO_CALIBRATION_OUT_c2	0
RESULTS_SEARCH_11_PARAMETERS_MSMS_AUTO_CALIBRATION_OUT_file	2
RESULTS_SEARCH_11_PARAMETERS_MSMS_AUTO_CALIBRATION_OUT_partnumber	11
RESULTS_SEARCH_11_PARAMETERS_MSMS_AUTO_CALIBRATION_OUT_polyorder	1
RESULTS_SEARCH_11_PARAMETERS_MSMS_AUTO_CALIBRATION_OUT_sample	1
RESULTS_SEARCH_11_PARAMETERS_MSMS_AUTO_CALIBRATION_OUT_squareroot	FALSE
RESULTS_SEARCH_11_PARAMETERS_MAX_PRECURSORS_FRAGLET	5
RESULTS_SEARCH_11_PARAMETERS_MAX_PRECURSORS_TAGLET	1
RESULTS_SEARCH_11_PARAMETERS_PRECURSORS_DR_FRAGLET	10
RESULTS_SEARCH_11_PARAMETERS_PRECURSORS_DR_TAGLET	3
RESULTS_SEARCH_11_PARAMETERS_DEFAULT_CHARGE_STATE_1_charge	1
RESULTS_SEARCH_11_PARAMETERS_DEFAULT_CHARGE_STATE_1_probability	1900-01-01
RESULTS_SEARCH_11_PARAMETERS_DEFAULT_CHARGE_STATE_2_charge	2
RESULTS_SEARCH_11_PARAMETERS_DEFAULT_CHARGE_STATE_2_probability	1
RESULTS_SEARCH_11_PARAMETERS_DEFAULT_CHARGE_STATE_3_charge	3
RESULTS_SEARCH_11_PARAMETERS_DEFAULT_CHARGE_STATE_3_probability	1
RESULTS_SEARCH_11_PARAMETERS_VERSION	5.0.2.0, 5346
RESULTS_SEARCH_11_PARAMETERS_PARAGON_VERSION	5.0.2.0, 5174
RESULTS_SEARCH_11_PARAMETERS_APPLICATION	ProteinPilot(tm) Software
RESULTS_SEARCH_11_PARAMETERS_PROGROUP_alternativedispositionmaximumfoldprobabilitydrop	100
RESULTS_SEARCH_11_PARAMETERS_PROGROUP_alternativedispositionmaximumfoldscoredrop	2
RESULTS_SEARCH_11_PARAMETERS_PROGROUP_autodiscordantpeptidethreshold	0.3
RESULTS_SEARCH_11_PARAMETERS_PROGROUP_bayesconfidencecalclulation	TRUE
RESULTS_SEARCH_11_PARAMETERS_PROGROUP_calibrateconfidence	TRUE
RESULTS_SEARCH_11_PARAMETERS_PROGROUP_compresspeptides	FALSE
RESULTS_SEARCH_11_PARAMETERS_PROGROUP_confidencepercentthresholdforexcludingothersfromquant	15
RESULTS_SEARCH_11_PARAMETERS_PROGROUP_confidencepercentthresholdforincludingselfinquant	15
RESULTS_SEARCH_11_PARAMETERS_PROGROUP_donotstoremspeaklists	FALSE
RESULTS_SEARCH_11_PARAMETERS_PROGROUP_fasta	C:\AB SCIEX\ProteinPilot Data\SearchDatabases\2019_UP_Mouse_Con.fasta
RESULTS_SEARCH_11_PARAMETERS_PROGROUP_featuregroupminpepconf	0.66
RESULTS_SEARCH_11_PARAMETERS_PROGROUP_featuregroupminups	0.47
RESULTS_SEARCH_11_PARAMETERS_PROGROUP_focusingintersection	4
RESULTS_SEARCH_11_PARAMETERS_PROGROUP_focusingminimummatchconfidence	0.1
RESULTS_SEARCH_11_PARAMETERS_PROGROUP_focusingminunusedprotscore	0.1
RESULTS_SEARCH_11_PARAMETERS_PROGROUP_focusingsubsetcutoff	6
RESULTS_SEARCH_11_PARAMETERS_PROGROUP_intersection	1900-01-01 07:12:00
RESULTS_SEARCH_11_PARAMETERS_PROGROUP_minimummatchconfidencecutoff	0.001
RESULTS_SEARCH_11_PARAMETERS_PROGROUP_minunusedprotscore	0.0458
RESULTS_SEARCH_11_PARAMETERS_PROGROUP_subsetcutoff	2
RESULTS_SEARCH_11_PARAMETERS_PROGROUP_uniprotservicehttpssupported	TRUE
RESULTS_SEARCH_11_PARAMETERS_PROGROUP_unusedprotscorethresholdforexcludingothersfromquant	1.3
RESULTS_SEARCH_11_PARAMETERS_PEAKLIST_count	3831
RESULTS_SEARCH_11_PARAMETERS_PEAKLIST_filenumber	1900-01-02
RESULTS_SEARCH_11_PARAMETERS_PEAKLIST_original_count	1910-06-27
RESULTS_SEARCH_11_PARAMETERS_PEAKLIST_originalfilename	C:\Data\Flores_Mirales\06202019\mus2\06172019_AFlor_Blad_2_A2.mgf
RESULTS_SEARCH_11_PARAMETERS_PEAKLIST_partnumber	11
RESULTS_SEARCH_11_PARAMETERS_QUANT_TYPE_background_correction	FALSE
RESULTS_SEARCH_11_PARAMETERS_QUANT_TYPE_bias_correction	TRUE
RESULTS_SEARCH_11_PARAMETERS_QUANT_TYPE_keep_extreme_peptides_over_fraction	0
RESULTS_SEARCH_11_PARAMETERS_QUANT_TYPE_low_confidence_check	TRUE
RESULTS_SEARCH_11_PARAMETERS_QUANT_TYPE_low_intensity_check	TRUE
RESULTS_SEARCH_11_PARAMETERS_QUANT_TYPE_median_statistic	TRUE
RESULTS_SEARCH_11_PARAMETERS_QUANT_TYPE_mod_check	TRUE
RESULTS_SEARCH_11_PARAMETERS_QUANT_TYPE_quant_threshold	-1
RESULTS_SEARCH_11_PARAMETERS_QUANT_TYPE_quant_threshold_sn	9
RESULTS_SEARCH_11_PARAMETERS_QUANT_TYPE_separate_searches	FALSE
RESULTS_SEARCH_11_PARAMETERS_QUANT_TYPE_shared_msms_check	TRUE
RESULTS_SEARCH_11_PARAMETERS_PARAGON_METHOD_SETTINGS_UI_SAMPLE_TYPE	Identification
RESULTS_SEARCH_11_PARAMETERS_PARAGON_METHOD_SETTINGS_UI_CYS_ALKYLATION	Iodoacetamide
RESULTS_SEARCH_11_PARAMETERS_PARAGON_METHOD_SETTINGS_UI_DIGESTION	Trypsin
RESULTS_SEARCH_11_PARAMETERS_PARAGON_METHOD_SETTINGS_UI_INSTRUMENT	Orbi MS (1-3ppm), Orbi MS/MS
RESULTS_SEARCH_11_PARAMETERS_PARAGON_METHOD_SETTINGS_UI_SEARCH_EFFORT	Rapid
RESULTS_SEARCH_11_PARAMETERS_PARAGON_METHOD_SETTINGS_UI_USER_NAME	ESC308585\MSPF
RESULTS_SEARCH_11_PARAMETERS_PARAGON_METHOD_SETTINGS_UI_MACHINE_NAME	ESC308585
RESULTS_SEARCH_11_PARAMETERS_PARAGON_METHOD_SETTINGS_UI_SEARCH_ID	6.36965e+17
RESULTS_SEARCH_11_PARAMETERS_PARAGON_METHOD_SETTINGS_UI_START_TIME	2019-06-19 13:41:42
RESULTS_SEARCH_11_PARAMETERS_PARAGON_METHOD_SETTINGS_UI_MIN_UNUSED_PROTSCORE	0.0458
RESULTS_SEARCH_11_PARAMETERS_PARAGON_METHOD_SETTINGS_UI_PSPEP	TRUE
RESULTS_SEARCH_12_time_cpu	81031
RESULTS_SEARCH_12_time_duration	81201
RESULTS_SEARCH_12_version	5.0.2.5174
RESULTS_SEARCH_12_xml:id	SEARCH:1:636965485021443360_11
RESULTS_SEARCH_12_PARAMETERS_chemical_data_edited	FALSE
RESULTS_SEARCH_12_PARAMETERS_do_multiprecursor_search	TRUE
RESULTS_SEARCH_12_PARAMETERS_do_reverse_search	TRUE
RESULTS_SEARCH_12_PARAMETERS_max_quant_labels	35
RESULTS_SEARCH_12_PARAMETERS_maxresults	15
RESULTS_SEARCH_12_PARAMETERS_separate_searches	FALSE
RESULTS_SEARCH_12_PARAMETERS_MSTOLERANCE_type	dalton
RESULTS_SEARCH_12_PARAMETERS_MSTOLERANCE_value	0.05
RESULTS_SEARCH_12_PARAMETERS_MSMSTOLERANCE_type	dalton
RESULTS_SEARCH_12_PARAMETERS_MSMSTOLERANCE_value	0.1
RESULTS_SEARCH_12_PARAMETERS_MS_STANDARD_DEVIATION_type	dalton
RESULTS_SEARCH_12_PARAMETERS_MS_STANDARD_DEVIATION_value	0.0025
RESULTS_SEARCH_12_PARAMETERS_MSMS_STANDARD_DEVIATION_type	dalton
RESULTS_SEARCH_12_PARAMETERS_MSMS_STANDARD_DEVIATION_value	0.004
RESULTS_SEARCH_12_PARAMETERS_FASTA_filename	C:\AB SCIEX\ProteinPilot Data\SearchDatabases\2019_UP_Mouse_Con.fasta
RESULTS_SEARCH_12_PARAMETERS_AUTO_CALIBRATION_ms	TRUE
RESULTS_SEARCH_12_PARAMETERS_AUTO_CALIBRATION_msexport	FALSE
RESULTS_SEARCH_12_PARAMETERS_AUTO_CALIBRATION_msms	TRUE
RESULTS_SEARCH_12_PARAMETERS_AUTO_CALIBRATION_msmstolsdratio	3
RESULTS_SEARCH_12_PARAMETERS_AUTO_CALIBRATION_mstolsdratio	11
RESULTS_SEARCH_12_PARAMETERS_AUTO_CALIBRATION_squareroot	FALSE
RESULTS_SEARCH_12_PARAMETERS_AUTO_CALIBRATION_type	dalton
RESULTS_SEARCH_12_PARAMETERS_AUTO_CALIBRATION_MCP_d_s_s_f	0.0666667
RESULTS_SEARCH_12_PARAMETERS_AUTO_CALIBRATION_MCP_d_s_w_f	3
RESULTS_SEARCH_12_PARAMETERS_AUTO_CALIBRATION_MCP_m_f_r_mbc	200
RESULTS_SEARCH_12_PARAMETERS_AUTO_CALIBRATION_MCP_m_m_c	10
RESULTS_SEARCH_12_PARAMETERS_AUTO_CALIBRATION_MCP_m_m_f_s	0.25
RESULTS_SEARCH_12_PARAMETERS_AUTO_CALIBRATION_MCP_m_m_p_f	0.33
RESULTS_SEARCH_12_PARAMETERS_AUTO_CALIBRATION_MCP_m_m_p_rms_f	1
RESULTS_SEARCH_12_PARAMETERS_AUTO_CALIBRATION_MCP_m_p_t_f	1
RESULTS_SEARCH_12_PARAMETERS_AUTO_CALIBRATION_MCP_m_r_h_n_b	15
RESULTS_SEARCH_12_PARAMETERS_AUTO_CALIBRATION_MCP_m_z_n_s	99
RESULTS_SEARCH_12_PARAMETERS_AUTO_CALIBRATION_MCP_m_z_s_mn_f_r	0.0666667
RESULTS_SEARCH_12_PARAMETERS_AUTO_CALIBRATION_MCP_m_z_s_mx_f_r	0.1
RESULTS_SEARCH_12_PARAMETERS_MS_AUTO_CALIBRATION_OUT_avres	-2.31584e-13
RESULTS_SEARCH_12_PARAMETERS_MS_AUTO_CALIBRATION_OUT_c0	-0.00123103
RESULTS_SEARCH_12_PARAMETERS_MS_AUTO_CALIBRATION_OUT_c1minus1	-1.25684e-05
RESULTS_SEARCH_12_PARAMETERS_MS_AUTO_CALIBRATION_OUT_c2	0
RESULTS_SEARCH_12_PARAMETERS_MS_AUTO_CALIBRATION_OUT_file	2
RESULTS_SEARCH_12_PARAMETERS_MS_AUTO_CALIBRATION_OUT_partnumber	12
RESULTS_SEARCH_12_PARAMETERS_MS_AUTO_CALIBRATION_OUT_polyorder	1
RESULTS_SEARCH_12_PARAMETERS_MS_AUTO_CALIBRATION_OUT_sample	1
RESULTS_SEARCH_12_PARAMETERS_MS_AUTO_CALIBRATION_OUT_squareroot	FALSE
RESULTS_SEARCH_12_PARAMETERS_MSMS_AUTO_CALIBRATION_OUT_avres	9.06767e-13
RESULTS_SEARCH_12_PARAMETERS_MSMS_AUTO_CALIBRATION_OUT_c0	-0.00348817
RESULTS_SEARCH_12_PARAMETERS_MSMS_AUTO_CALIBRATION_OUT_c1minus1	-5.32142e-06
RESULTS_SEARCH_12_PARAMETERS_MSMS_AUTO_CALIBRATION_OUT_c2	0
RESULTS_SEARCH_12_PARAMETERS_MSMS_AUTO_CALIBRATION_OUT_file	2
RESULTS_SEARCH_12_PARAMETERS_MSMS_AUTO_CALIBRATION_OUT_partnumber	12
RESULTS_SEARCH_12_PARAMETERS_MSMS_AUTO_CALIBRATION_OUT_polyorder	1
RESULTS_SEARCH_12_PARAMETERS_MSMS_AUTO_CALIBRATION_OUT_sample	1
RESULTS_SEARCH_12_PARAMETERS_MSMS_AUTO_CALIBRATION_OUT_squareroot	FALSE
RESULTS_SEARCH_12_PARAMETERS_MAX_PRECURSORS_FRAGLET	5
RESULTS_SEARCH_12_PARAMETERS_MAX_PRECURSORS_TAGLET	1
RESULTS_SEARCH_12_PARAMETERS_PRECURSORS_DR_FRAGLET	10
RESULTS_SEARCH_12_PARAMETERS_PRECURSORS_DR_TAGLET	3
RESULTS_SEARCH_12_PARAMETERS_DEFAULT_CHARGE_STATE_1_charge	1
RESULTS_SEARCH_12_PARAMETERS_DEFAULT_CHARGE_STATE_1_probability	1
RESULTS_SEARCH_12_PARAMETERS_DEFAULT_CHARGE_STATE_2_charge	2
RESULTS_SEARCH_12_PARAMETERS_DEFAULT_CHARGE_STATE_2_probability	1
RESULTS_SEARCH_12_PARAMETERS_DEFAULT_CHARGE_STATE_3_charge	3
RESULTS_SEARCH_12_PARAMETERS_DEFAULT_CHARGE_STATE_3_probability	1
RESULTS_SEARCH_12_PARAMETERS_VERSION	5.0.2.0, 5346
RESULTS_SEARCH_12_PARAMETERS_PARAGON_VERSION	5.0.2.0, 5174
RESULTS_SEARCH_12_PARAMETERS_APPLICATION	ProteinPilot(tm) Software
RESULTS_SEARCH_12_PARAMETERS_PROGROUP_alternativedispositionmaximumfoldprobabilitydrop	100
RESULTS_SEARCH_12_PARAMETERS_PROGROUP_alternativedispositionmaximumfoldscoredrop	2
RESULTS_SEARCH_12_PARAMETERS_PROGROUP_autodiscordantpeptidethreshold	0.3
RESULTS_SEARCH_12_PARAMETERS_PROGROUP_bayesconfidencecalclulation	TRUE
RESULTS_SEARCH_12_PARAMETERS_PROGROUP_calibrateconfidence	TRUE
RESULTS_SEARCH_12_PARAMETERS_PROGROUP_compresspeptides	FALSE
RESULTS_SEARCH_12_PARAMETERS_PROGROUP_confidencepercentthresholdforexcludingothersfromquant	15
RESULTS_SEARCH_12_PARAMETERS_PROGROUP_confidencepercentthresholdforincludingselfinquant	15
RESULTS_SEARCH_12_PARAMETERS_PROGROUP_donotstoremspeaklists	FALSE
RESULTS_SEARCH_12_PARAMETERS_PROGROUP_fasta	C:\AB SCIEX\ProteinPilot Data\SearchDatabases\2019_UP_Mouse_Con.fasta
RESULTS_SEARCH_12_PARAMETERS_PROGROUP_featuregroupminpepconf	0.66
RESULTS_SEARCH_12_PARAMETERS_PROGROUP_featuregroupminups	0.47
RESULTS_SEARCH_12_PARAMETERS_PROGROUP_focusingintersection	4
RESULTS_SEARCH_12_PARAMETERS_PROGROUP_focusingminimummatchconfidence	0.1
RESULTS_SEARCH_12_PARAMETERS_PROGROUP_focusingminunusedprotscore	02:24:00
RESULTS_SEARCH_12_PARAMETERS_PROGROUP_focusingsubsetcutoff	6
RESULTS_SEARCH_12_PARAMETERS_PROGROUP_intersection	1.3
RESULTS_SEARCH_12_PARAMETERS_PROGROUP_minimummatchconfidencecutoff	0.001
RESULTS_SEARCH_12_PARAMETERS_PROGROUP_minunusedprotscore	0.0458
RESULTS_SEARCH_12_PARAMETERS_PROGROUP_subsetcutoff	2
RESULTS_SEARCH_12_PARAMETERS_PROGROUP_uniprotservicehttpssupported	TRUE
RESULTS_SEARCH_12_PARAMETERS_PROGROUP_unusedprotscorethresholdforexcludingothersfromquant	1.3
RESULTS_SEARCH_12_PARAMETERS_PEAKLIST_count	3946
RESULTS_SEARCH_12_PARAMETERS_PEAKLIST_filenumber	2
RESULTS_SEARCH_12_PARAMETERS_PEAKLIST_original_count	3946
RESULTS_SEARCH_12_PARAMETERS_PEAKLIST_originalfilename	C:\Data\Flores_Mirales\06202019\mus2\06172019_AFlor_Blad_2_A2.mgf
RESULTS_SEARCH_12_PARAMETERS_PEAKLIST_partnumber	12
RESULTS_SEARCH_12_PARAMETERS_QUANT_TYPE_background_correction	FALSE
RESULTS_SEARCH_12_PARAMETERS_QUANT_TYPE_bias_correction	TRUE
RESULTS_SEARCH_12_PARAMETERS_QUANT_TYPE_keep_extreme_peptides_over_fraction	0
RESULTS_SEARCH_12_PARAMETERS_QUANT_TYPE_low_confidence_check	TRUE
RESULTS_SEARCH_12_PARAMETERS_QUANT_TYPE_low_intensity_check	TRUE
RESULTS_SEARCH_12_PARAMETERS_QUANT_TYPE_median_statistic	TRUE
RESULTS_SEARCH_12_PARAMETERS_QUANT_TYPE_mod_check	TRUE
RESULTS_SEARCH_12_PARAMETERS_QUANT_TYPE_quant_threshold	-1
RESULTS_SEARCH_12_PARAMETERS_QUANT_TYPE_quant_threshold_sn	9
RESULTS_SEARCH_12_PARAMETERS_QUANT_TYPE_separate_searches	FALSE
RESULTS_SEARCH_12_PARAMETERS_QUANT_TYPE_shared_msms_check	TRUE
RESULTS_SEARCH_12_PARAMETERS_PARAGON_METHOD_SETTINGS_UI_SAMPLE_TYPE	Identification
RESULTS_SEARCH_12_PARAMETERS_PARAGON_METHOD_SETTINGS_UI_CYS_ALKYLATION	Iodoacetamide
RESULTS_SEARCH_12_PARAMETERS_PARAGON_METHOD_SETTINGS_UI_DIGESTION	Trypsin
RESULTS_SEARCH_12_PARAMETERS_PARAGON_METHOD_SETTINGS_UI_INSTRUMENT	Orbi MS (1-3ppm), Orbi MS/MS
RESULTS_SEARCH_12_PARAMETERS_PARAGON_METHOD_SETTINGS_UI_SEARCH_EFFORT	Rapid
RESULTS_SEARCH_12_PARAMETERS_PARAGON_METHOD_SETTINGS_UI_USER_NAME	ESC308585\MSPF
RESULTS_SEARCH_12_PARAMETERS_PARAGON_METHOD_SETTINGS_UI_MACHINE_NAME	ESC308585
RESULTS_SEARCH_12_PARAMETERS_PARAGON_METHOD_SETTINGS_UI_SEARCH_ID	6.36965e+17
RESULTS_SEARCH_12_PARAMETERS_PARAGON_METHOD_SETTINGS_UI_START_TIME	2019-06-19 13:41:42
RESULTS_SEARCH_12_PARAMETERS_PARAGON_METHOD_SETTINGS_UI_MIN_UNUSED_PROTSCORE	0.0458
RESULTS_SEARCH_12_PARAMETERS_PARAGON_METHOD_SETTINGS_UI_PSPEP	TRUE
RESULTS_SEARCH_13_time_cpu	75515
RESULTS_SEARCH_13_time_duration	75746
RESULTS_SEARCH_13_version	5.0.2.5174
RESULTS_SEARCH_13_xml:id	SEARCH:1:636965485021443360_12
RESULTS_SEARCH_13_PARAMETERS_chemical_data_edited	FALSE
RESULTS_SEARCH_13_PARAMETERS_do_multiprecursor_search	TRUE
RESULTS_SEARCH_13_PARAMETERS_do_reverse_search	TRUE
RESULTS_SEARCH_13_PARAMETERS_max_quant_labels	35
RESULTS_SEARCH_13_PARAMETERS_maxresults	15
RESULTS_SEARCH_13_PARAMETERS_separate_searches	FALSE
RESULTS_SEARCH_13_PARAMETERS_MSTOLERANCE_type	dalton
RESULTS_SEARCH_13_PARAMETERS_MSTOLERANCE_value	0.05
RESULTS_SEARCH_13_PARAMETERS_MSMSTOLERANCE_type	dalton
RESULTS_SEARCH_13_PARAMETERS_MSMSTOLERANCE_value	0.1
RESULTS_SEARCH_13_PARAMETERS_MS_STANDARD_DEVIATION_type	dalton
RESULTS_SEARCH_13_PARAMETERS_MS_STANDARD_DEVIATION_value	0.0025
RESULTS_SEARCH_13_PARAMETERS_MSMS_STANDARD_DEVIATION_type	dalton
RESULTS_SEARCH_13_PARAMETERS_MSMS_STANDARD_DEVIATION_value	0.004
RESULTS_SEARCH_13_PARAMETERS_FASTA_filename	C:\AB SCIEX\ProteinPilot Data\SearchDatabases\2019_UP_Mouse_Con.fasta
RESULTS_SEARCH_13_PARAMETERS_AUTO_CALIBRATION_ms	TRUE
RESULTS_SEARCH_13_PARAMETERS_AUTO_CALIBRATION_msexport	FALSE
RESULTS_SEARCH_13_PARAMETERS_AUTO_CALIBRATION_msms	TRUE
RESULTS_SEARCH_13_PARAMETERS_AUTO_CALIBRATION_msmstolsdratio	3
RESULTS_SEARCH_13_PARAMETERS_AUTO_CALIBRATION_mstolsdratio	11
RESULTS_SEARCH_13_PARAMETERS_AUTO_CALIBRATION_squareroot	FALSE
RESULTS_SEARCH_13_PARAMETERS_AUTO_CALIBRATION_type	dalton
RESULTS_SEARCH_13_PARAMETERS_AUTO_CALIBRATION_MCP_d_s_s_f	0.0666667
RESULTS_SEARCH_13_PARAMETERS_AUTO_CALIBRATION_MCP_d_s_w_f	3
RESULTS_SEARCH_13_PARAMETERS_AUTO_CALIBRATION_MCP_m_f_r_mbc	200
RESULTS_SEARCH_13_PARAMETERS_AUTO_CALIBRATION_MCP_m_m_c	10
RESULTS_SEARCH_13_PARAMETERS_AUTO_CALIBRATION_MCP_m_m_f_s	0.25
RESULTS_SEARCH_13_PARAMETERS_AUTO_CALIBRATION_MCP_m_m_p_f	0.33
RESULTS_SEARCH_13_PARAMETERS_AUTO_CALIBRATION_MCP_m_m_p_rms_f	1
RESULTS_SEARCH_13_PARAMETERS_AUTO_CALIBRATION_MCP_m_p_t_f	1
RESULTS_SEARCH_13_PARAMETERS_AUTO_CALIBRATION_MCP_m_r_h_n_b	15
RESULTS_SEARCH_13_PARAMETERS_AUTO_CALIBRATION_MCP_m_z_n_s	99
RESULTS_SEARCH_13_PARAMETERS_AUTO_CALIBRATION_MCP_m_z_s_mn_f_r	0.0666667
RESULTS_SEARCH_13_PARAMETERS_AUTO_CALIBRATION_MCP_m_z_s_mx_f_r	0.1
RESULTS_SEARCH_13_PARAMETERS_MS_AUTO_CALIBRATION_OUT_avres	2.22442e-12
RESULTS_SEARCH_13_PARAMETERS_MS_AUTO_CALIBRATION_OUT_c0	-0.000179273
RESULTS_SEARCH_13_PARAMETERS_MS_AUTO_CALIBRATION_OUT_c1minus1	-1.48493e-05
RESULTS_SEARCH_13_PARAMETERS_MS_AUTO_CALIBRATION_OUT_c2	0
RESULTS_SEARCH_13_PARAMETERS_MS_AUTO_CALIBRATION_OUT_file	3
RESULTS_SEARCH_13_PARAMETERS_MS_AUTO_CALIBRATION_OUT_partnumber	13
RESULTS_SEARCH_13_PARAMETERS_MS_AUTO_CALIBRATION_OUT_polyorder	1
RESULTS_SEARCH_13_PARAMETERS_MS_AUTO_CALIBRATION_OUT_sample	1
RESULTS_SEARCH_13_PARAMETERS_MS_AUTO_CALIBRATION_OUT_squareroot	FALSE
RESULTS_SEARCH_13_PARAMETERS_MSMS_AUTO_CALIBRATION_OUT_avres	2.22586e-12
RESULTS_SEARCH_13_PARAMETERS_MSMS_AUTO_CALIBRATION_OUT_c0	-0.000589812
RESULTS_SEARCH_13_PARAMETERS_MSMS_AUTO_CALIBRATION_OUT_c1minus1	-1.05464e-05
RESULTS_SEARCH_13_PARAMETERS_MSMS_AUTO_CALIBRATION_OUT_c2	0
RESULTS_SEARCH_13_PARAMETERS_MSMS_AUTO_CALIBRATION_OUT_file	3
RESULTS_SEARCH_13_PARAMETERS_MSMS_AUTO_CALIBRATION_OUT_partnumber	13
RESULTS_SEARCH_13_PARAMETERS_MSMS_AUTO_CALIBRATION_OUT_polyorder	1
RESULTS_SEARCH_13_PARAMETERS_MSMS_AUTO_CALIBRATION_OUT_sample	1
RESULTS_SEARCH_13_PARAMETERS_MSMS_AUTO_CALIBRATION_OUT_squareroot	FALSE
RESULTS_SEARCH_13_PARAMETERS_MAX_PRECURSORS_FRAGLET	5
RESULTS_SEARCH_13_PARAMETERS_MAX_PRECURSORS_TAGLET	1
RESULTS_SEARCH_13_PARAMETERS_PRECURSORS_DR_FRAGLET	10
RESULTS_SEARCH_13_PARAMETERS_PRECURSORS_DR_TAGLET	3
RESULTS_SEARCH_13_PARAMETERS_DEFAULT_CHARGE_STATE_1_charge	1
RESULTS_SEARCH_13_PARAMETERS_DEFAULT_CHARGE_STATE_1_probability	1
RESULTS_SEARCH_13_PARAMETERS_DEFAULT_CHARGE_STATE_2_charge	2
RESULTS_SEARCH_13_PARAMETERS_DEFAULT_CHARGE_STATE_2_probability	1
RESULTS_SEARCH_13_PARAMETERS_DEFAULT_CHARGE_STATE_3_charge	3
RESULTS_SEARCH_13_PARAMETERS_DEFAULT_CHARGE_STATE_3_probability	1
RESULTS_SEARCH_13_PARAMETERS_VERSION	5.0.2.0, 5346
RESULTS_SEARCH_13_PARAMETERS_PARAGON_VERSION	5.0.2.0, 5174
RESULTS_SEARCH_13_PARAMETERS_APPLICATION	ProteinPilot(tm) Software
RESULTS_SEARCH_13_PARAMETERS_PROGROUP_alternativedispositionmaximumfoldprobabilitydrop	100
RESULTS_SEARCH_13_PARAMETERS_PROGROUP_alternativedispositionmaximumfoldscoredrop	2
RESULTS_SEARCH_13_PARAMETERS_PROGROUP_autodiscordantpeptidethreshold	0.3
RESULTS_SEARCH_13_PARAMETERS_PROGROUP_bayesconfidencecalclulation	TRUE
RESULTS_SEARCH_13_PARAMETERS_PROGROUP_calibrateconfidence	TRUE
RESULTS_SEARCH_13_PARAMETERS_PROGROUP_compresspeptides	FALSE
RESULTS_SEARCH_13_PARAMETERS_PROGROUP_confidencepercentthresholdforexcludingothersfromquant	15
RESULTS_SEARCH_13_PARAMETERS_PROGROUP_confidencepercentthresholdforincludingselfinquant	15
RESULTS_SEARCH_13_PARAMETERS_PROGROUP_donotstoremspeaklists	FALSE
RESULTS_SEARCH_13_PARAMETERS_PROGROUP_fasta	C:\AB SCIEX\ProteinPilot Data\SearchDatabases\2019_UP_Mouse_Con.fasta
RESULTS_SEARCH_13_PARAMETERS_PROGROUP_featuregroupminpepconf	0.66
RESULTS_SEARCH_13_PARAMETERS_PROGROUP_featuregroupminups	0.47
RESULTS_SEARCH_13_PARAMETERS_PROGROUP_focusingintersection	4
RESULTS_SEARCH_13_PARAMETERS_PROGROUP_focusingminimummatchconfidence	0.1
RESULTS_SEARCH_13_PARAMETERS_PROGROUP_focusingminunusedprotscore	0.1
RESULTS_SEARCH_13_PARAMETERS_PROGROUP_focusingsubsetcutoff	6
RESULTS_SEARCH_13_PARAMETERS_PROGROUP_intersection	1.3
RESULTS_SEARCH_13_PARAMETERS_PROGROUP_minimummatchconfidencecutoff	0.001
RESULTS_SEARCH_13_PARAMETERS_PROGROUP_minunusedprotscore	0.0458
RESULTS_SEARCH_13_PARAMETERS_PROGROUP_subsetcutoff	2
RESULTS_SEARCH_13_PARAMETERS_PROGROUP_uniprotservicehttpssupported	TRUE
RESULTS_SEARCH_13_PARAMETERS_PROGROUP_unusedprotscorethresholdforexcludingothersfromquant	1.3
RESULTS_SEARCH_13_PARAMETERS_PEAKLIST_count	3237
RESULTS_SEARCH_13_PARAMETERS_PEAKLIST_filenumber	3
RESULTS_SEARCH_13_PARAMETERS_PEAKLIST_original_count	3237
RESULTS_SEARCH_13_PARAMETERS_PEAKLIST_originalfilename	C:\Data\Flores_Mirales\06202019\mus2\06172019_AFlor_Blad_2_A3.mgf
RESULTS_SEARCH_13_PARAMETERS_PEAKLIST_partnumber	13
RESULTS_SEARCH_13_PARAMETERS_QUANT_TYPE_background_correction	FALSE
RESULTS_SEARCH_13_PARAMETERS_QUANT_TYPE_bias_correction	TRUE
RESULTS_SEARCH_13_PARAMETERS_QUANT_TYPE_keep_extreme_peptides_over_fraction	0
RESULTS_SEARCH_13_PARAMETERS_QUANT_TYPE_low_confidence_check	TRUE
RESULTS_SEARCH_13_PARAMETERS_QUANT_TYPE_low_intensity_check	TRUE
RESULTS_SEARCH_13_PARAMETERS_QUANT_TYPE_median_statistic	TRUE
RESULTS_SEARCH_13_PARAMETERS_QUANT_TYPE_mod_check	TRUE
RESULTS_SEARCH_13_PARAMETERS_QUANT_TYPE_quant_threshold	-1
RESULTS_SEARCH_13_PARAMETERS_QUANT_TYPE_quant_threshold_sn	9
RESULTS_SEARCH_13_PARAMETERS_QUANT_TYPE_separate_searches	FALSE
RESULTS_SEARCH_13_PARAMETERS_QUANT_TYPE_shared_msms_check	TRUE
RESULTS_SEARCH_13_PARAMETERS_PARAGON_METHOD_SETTINGS_UI_SAMPLE_TYPE	Identification
RESULTS_SEARCH_13_PARAMETERS_PARAGON_METHOD_SETTINGS_UI_CYS_ALKYLATION	Iodoacetamide
RESULTS_SEARCH_13_PARAMETERS_PARAGON_METHOD_SETTINGS_UI_DIGESTION	Trypsin
RESULTS_SEARCH_13_PARAMETERS_PARAGON_METHOD_SETTINGS_UI_INSTRUMENT	Orbi MS (1-3ppm), Orbi MS/MS
RESULTS_SEARCH_13_PARAMETERS_PARAGON_METHOD_SETTINGS_UI_SEARCH_EFFORT	Rapid
RESULTS_SEARCH_13_PARAMETERS_PARAGON_METHOD_SETTINGS_UI_USER_NAME	ESC308585\MSPF
RESULTS_SEARCH_13_PARAMETERS_PARAGON_METHOD_SETTINGS_UI_MACHINE_NAME	ESC308585
RESULTS_SEARCH_13_PARAMETERS_PARAGON_METHOD_SETTINGS_UI_SEARCH_ID	6.36965e+17
RESULTS_SEARCH_13_PARAMETERS_PARAGON_METHOD_SETTINGS_UI_START_TIME	2019-06-19 13:41:42
RESULTS_SEARCH_13_PARAMETERS_PARAGON_METHOD_SETTINGS_UI_MIN_UNUSED_PROTSCORE	0.0458
RESULTS_SEARCH_13_PARAMETERS_PARAGON_METHOD_SETTINGS_UI_PSPEP	TRUE
RESULTS_SEARCH_14_time_cpu	72812
RESULTS_SEARCH_14_time_duration	72946
RESULTS_SEARCH_14_version	5.0.2.5174
RESULTS_SEARCH_14_xml:id	SEARCH:1:636965485021443360_13
RESULTS_SEARCH_14_PARAMETERS_chemical_data_edited	FALSE
RESULTS_SEARCH_14_PARAMETERS_do_multiprecursor_search	TRUE
RESULTS_SEARCH_14_PARAMETERS_do_reverse_search	TRUE
RESULTS_SEARCH_14_PARAMETERS_max_quant_labels	35
RESULTS_SEARCH_14_PARAMETERS_maxresults	15
RESULTS_SEARCH_14_PARAMETERS_separate_searches	FALSE
RESULTS_SEARCH_14_PARAMETERS_MSTOLERANCE_type	dalton
RESULTS_SEARCH_14_PARAMETERS_MSTOLERANCE_value	0.05
RESULTS_SEARCH_14_PARAMETERS_MSMSTOLERANCE_type	dalton
RESULTS_SEARCH_14_PARAMETERS_MSMSTOLERANCE_value	0.1
RESULTS_SEARCH_14_PARAMETERS_MS_STANDARD_DEVIATION_type	dalton
RESULTS_SEARCH_14_PARAMETERS_MS_STANDARD_DEVIATION_value	0.0025
RESULTS_SEARCH_14_PARAMETERS_MSMS_STANDARD_DEVIATION_type	dalton
RESULTS_SEARCH_14_PARAMETERS_MSMS_STANDARD_DEVIATION_value	0.004
RESULTS_SEARCH_14_PARAMETERS_FASTA_filename	C:\AB SCIEX\ProteinPilot Data\SearchDatabases\2019_UP_Mouse_Con.fasta
RESULTS_SEARCH_14_PARAMETERS_AUTO_CALIBRATION_ms	TRUE
RESULTS_SEARCH_14_PARAMETERS_AUTO_CALIBRATION_msexport	FALSE
RESULTS_SEARCH_14_PARAMETERS_AUTO_CALIBRATION_msms	TRUE
RESULTS_SEARCH_14_PARAMETERS_AUTO_CALIBRATION_msmstolsdratio	3
RESULTS_SEARCH_14_PARAMETERS_AUTO_CALIBRATION_mstolsdratio	11
RESULTS_SEARCH_14_PARAMETERS_AUTO_CALIBRATION_squareroot	FALSE
RESULTS_SEARCH_14_PARAMETERS_AUTO_CALIBRATION_type	dalton
RESULTS_SEARCH_14_PARAMETERS_AUTO_CALIBRATION_MCP_d_s_s_f	0.0666667
RESULTS_SEARCH_14_PARAMETERS_AUTO_CALIBRATION_MCP_d_s_w_f	3
RESULTS_SEARCH_14_PARAMETERS_AUTO_CALIBRATION_MCP_m_f_r_mbc	200
RESULTS_SEARCH_14_PARAMETERS_AUTO_CALIBRATION_MCP_m_m_c	10
RESULTS_SEARCH_14_PARAMETERS_AUTO_CALIBRATION_MCP_m_m_f_s	0.25
RESULTS_SEARCH_14_PARAMETERS_AUTO_CALIBRATION_MCP_m_m_p_f	0.33
RESULTS_SEARCH_14_PARAMETERS_AUTO_CALIBRATION_MCP_m_m_p_rms_f	1
RESULTS_SEARCH_14_PARAMETERS_AUTO_CALIBRATION_MCP_m_p_t_f	1
RESULTS_SEARCH_14_PARAMETERS_AUTO_CALIBRATION_MCP_m_r_h_n_b	15
RESULTS_SEARCH_14_PARAMETERS_AUTO_CALIBRATION_MCP_m_z_n_s	99
RESULTS_SEARCH_14_PARAMETERS_AUTO_CALIBRATION_MCP_m_z_s_mn_f_r	0.0666667
RESULTS_SEARCH_14_PARAMETERS_AUTO_CALIBRATION_MCP_m_z_s_mx_f_r	0.1
RESULTS_SEARCH_14_PARAMETERS_MS_AUTO_CALIBRATION_OUT_avres	-1.16737e-12
RESULTS_SEARCH_14_PARAMETERS_MS_AUTO_CALIBRATION_OUT_c0	-0.00129578
RESULTS_SEARCH_14_PARAMETERS_MS_AUTO_CALIBRATION_OUT_c1minus1	-1.34783e-05
RESULTS_SEARCH_14_PARAMETERS_MS_AUTO_CALIBRATION_OUT_c2	0
RESULTS_SEARCH_14_PARAMETERS_MS_AUTO_CALIBRATION_OUT_file	3
RESULTS_SEARCH_14_PARAMETERS_MS_AUTO_CALIBRATION_OUT_partnumber	14
RESULTS_SEARCH_14_PARAMETERS_MS_AUTO_CALIBRATION_OUT_polyorder	1
RESULTS_SEARCH_14_PARAMETERS_MS_AUTO_CALIBRATION_OUT_sample	1
RESULTS_SEARCH_14_PARAMETERS_MS_AUTO_CALIBRATION_OUT_squareroot	FALSE
RESULTS_SEARCH_14_PARAMETERS_MSMS_AUTO_CALIBRATION_OUT_avres	-7.42621e-13
RESULTS_SEARCH_14_PARAMETERS_MSMS_AUTO_CALIBRATION_OUT_c0	-0.000718162
RESULTS_SEARCH_14_PARAMETERS_MSMS_AUTO_CALIBRATION_OUT_c1minus1	-1.1093e-05
RESULTS_SEARCH_14_PARAMETERS_MSMS_AUTO_CALIBRATION_OUT_c2	0
RESULTS_SEARCH_14_PARAMETERS_MSMS_AUTO_CALIBRATION_OUT_file	3
RESULTS_SEARCH_14_PARAMETERS_MSMS_AUTO_CALIBRATION_OUT_partnumber	14
RESULTS_SEARCH_14_PARAMETERS_MSMS_AUTO_CALIBRATION_OUT_polyorder	1
RESULTS_SEARCH_14_PARAMETERS_MSMS_AUTO_CALIBRATION_OUT_sample	1
RESULTS_SEARCH_14_PARAMETERS_MSMS_AUTO_CALIBRATION_OUT_squareroot	FALSE
RESULTS_SEARCH_14_PARAMETERS_MAX_PRECURSORS_FRAGLET	5
RESULTS_SEARCH_14_PARAMETERS_MAX_PRECURSORS_TAGLET	1
RESULTS_SEARCH_14_PARAMETERS_PRECURSORS_DR_FRAGLET	10
RESULTS_SEARCH_14_PARAMETERS_PRECURSORS_DR_TAGLET	3
RESULTS_SEARCH_14_PARAMETERS_DEFAULT_CHARGE_STATE_1_charge	1
RESULTS_SEARCH_14_PARAMETERS_DEFAULT_CHARGE_STATE_1_probability	1
RESULTS_SEARCH_14_PARAMETERS_DEFAULT_CHARGE_STATE_2_charge	2
RESULTS_SEARCH_14_PARAMETERS_DEFAULT_CHARGE_STATE_2_probability	1
RESULTS_SEARCH_14_PARAMETERS_DEFAULT_CHARGE_STATE_3_charge	3
RESULTS_SEARCH_14_PARAMETERS_DEFAULT_CHARGE_STATE_3_probability	1
RESULTS_SEARCH_14_PARAMETERS_VERSION	5.0.2.0, 5346
RESULTS_SEARCH_14_PARAMETERS_PARAGON_VERSION	5.0.2.0, 5174
RESULTS_SEARCH_14_PARAMETERS_APPLICATION	ProteinPilot(tm) Software
RESULTS_SEARCH_14_PARAMETERS_PROGROUP_alternativedispositionmaximumfoldprobabilitydrop	100
RESULTS_SEARCH_14_PARAMETERS_PROGROUP_alternativedispositionmaximumfoldscoredrop	2
RESULTS_SEARCH_14_PARAMETERS_PROGROUP_autodiscordantpeptidethreshold	0.3
RESULTS_SEARCH_14_PARAMETERS_PROGROUP_bayesconfidencecalclulation	TRUE
RESULTS_SEARCH_14_PARAMETERS_PROGROUP_calibrateconfidence	TRUE
RESULTS_SEARCH_14_PARAMETERS_PROGROUP_compresspeptides	FALSE
RESULTS_SEARCH_14_PARAMETERS_PROGROUP_confidencepercentthresholdforexcludingothersfromquant	15
RESULTS_SEARCH_14_PARAMETERS_PROGROUP_confidencepercentthresholdforincludingselfinquant	15
RESULTS_SEARCH_14_PARAMETERS_PROGROUP_donotstoremspeaklists	FALSE
RESULTS_SEARCH_14_PARAMETERS_PROGROUP_fasta	C:\AB SCIEX\ProteinPilot Data\SearchDatabases\2019_UP_Mouse_Con.fasta
RESULTS_SEARCH_14_PARAMETERS_PROGROUP_featuregroupminpepconf	0.66
RESULTS_SEARCH_14_PARAMETERS_PROGROUP_featuregroupminups	0.47
RESULTS_SEARCH_14_PARAMETERS_PROGROUP_focusingintersection	4
RESULTS_SEARCH_14_PARAMETERS_PROGROUP_focusingminimummatchconfidence	0.1
RESULTS_SEARCH_14_PARAMETERS_PROGROUP_focusingminunusedprotscore	0.1
RESULTS_SEARCH_14_PARAMETERS_PROGROUP_focusingsubsetcutoff	6
RESULTS_SEARCH_14_PARAMETERS_PROGROUP_intersection	1.3
RESULTS_SEARCH_14_PARAMETERS_PROGROUP_minimummatchconfidencecutoff	0.001
RESULTS_SEARCH_14_PARAMETERS_PROGROUP_minunusedprotscore	0.0458
RESULTS_SEARCH_14_PARAMETERS_PROGROUP_subsetcutoff	2
RESULTS_SEARCH_14_PARAMETERS_PROGROUP_uniprotservicehttpssupported	TRUE
RESULTS_SEARCH_14_PARAMETERS_PROGROUP_unusedprotscorethresholdforexcludingothersfromquant	1.3
RESULTS_SEARCH_14_PARAMETERS_PEAKLIST_count	2361
RESULTS_SEARCH_14_PARAMETERS_PEAKLIST_filenumber	3
RESULTS_SEARCH_14_PARAMETERS_PEAKLIST_original_count	2361
RESULTS_SEARCH_14_PARAMETERS_PEAKLIST_originalfilename	C:\Data\Flores_Mirales\06202019\mus2\06172019_AFlor_Blad_2_A3.mgf
RESULTS_SEARCH_14_PARAMETERS_PEAKLIST_partnumber	14
RESULTS_SEARCH_14_PARAMETERS_QUANT_TYPE_background_correction	FALSE
RESULTS_SEARCH_14_PARAMETERS_QUANT_TYPE_bias_correction	TRUE
RESULTS_SEARCH_14_PARAMETERS_QUANT_TYPE_keep_extreme_peptides_over_fraction	0
RESULTS_SEARCH_14_PARAMETERS_QUANT_TYPE_low_confidence_check	TRUE
RESULTS_SEARCH_14_PARAMETERS_QUANT_TYPE_low_intensity_check	TRUE
RESULTS_SEARCH_14_PARAMETERS_QUANT_TYPE_median_statistic	TRUE
RESULTS_SEARCH_14_PARAMETERS_QUANT_TYPE_mod_check	TRUE
RESULTS_SEARCH_14_PARAMETERS_QUANT_TYPE_quant_threshold	-1
RESULTS_SEARCH_14_PARAMETERS_QUANT_TYPE_quant_threshold_sn	9
RESULTS_SEARCH_14_PARAMETERS_QUANT_TYPE_separate_searches	FALSE
RESULTS_SEARCH_14_PARAMETERS_QUANT_TYPE_shared_msms_check	TRUE
RESULTS_SEARCH_14_PARAMETERS_PARAGON_METHOD_SETTINGS_UI_SAMPLE_TYPE	Identification
RESULTS_SEARCH_14_PARAMETERS_PARAGON_METHOD_SETTINGS_UI_CYS_ALKYLATION	Iodoacetamide
RESULTS_SEARCH_14_PARAMETERS_PARAGON_METHOD_SETTINGS_UI_DIGESTION	Trypsin
RESULTS_SEARCH_14_PARAMETERS_PARAGON_METHOD_SETTINGS_UI_INSTRUMENT	Orbi MS (1-3ppm), Orbi MS/MS
RESULTS_SEARCH_14_PARAMETERS_PARAGON_METHOD_SETTINGS_UI_SEARCH_EFFORT	Rapid
RESULTS_SEARCH_14_PARAMETERS_PARAGON_METHOD_SETTINGS_UI_USER_NAME	ESC308585\MSPF
RESULTS_SEARCH_14_PARAMETERS_PARAGON_METHOD_SETTINGS_UI_MACHINE_NAME	ESC308585
RESULTS_SEARCH_14_PARAMETERS_PARAGON_METHOD_SETTINGS_UI_SEARCH_ID	#VALUE!
RESULTS_SEARCH_14_PARAMETERS_PARAGON_METHOD_SETTINGS_UI_START_TIME	2019-06-19 13:41:42
RESULTS_SEARCH_14_PARAMETERS_PARAGON_METHOD_SETTINGS_UI_MIN_UNUSED_PROTSCORE	0.0458
RESULTS_SEARCH_14_PARAMETERS_PARAGON_METHOD_SETTINGS_UI_PSPEP	TRUE
RESULTS_SEARCH_15_time_cpu	76718
RESULTS_SEARCH_15_time_duration	77104
RESULTS_SEARCH_15_version	5.0.2.5174
RESULTS_SEARCH_15_xml:id	SEARCH:1:636965485021443360_14
RESULTS_SEARCH_15_PARAMETERS_chemical_data_edited	FALSE
RESULTS_SEARCH_15_PARAMETERS_do_multiprecursor_search	TRUE
RESULTS_SEARCH_15_PARAMETERS_do_reverse_search	TRUE
RESULTS_SEARCH_15_PARAMETERS_max_quant_labels	35
RESULTS_SEARCH_15_PARAMETERS_maxresults	15
RESULTS_SEARCH_15_PARAMETERS_separate_searches	FALSE
RESULTS_SEARCH_15_PARAMETERS_MSTOLERANCE_type	dalton
RESULTS_SEARCH_15_PARAMETERS_MSTOLERANCE_value	0.05
RESULTS_SEARCH_15_PARAMETERS_MSMSTOLERANCE_type	dalton
RESULTS_SEARCH_15_PARAMETERS_MSMSTOLERANCE_value	0.1
RESULTS_SEARCH_15_PARAMETERS_MS_STANDARD_DEVIATION_type	dalton
RESULTS_SEARCH_15_PARAMETERS_MS_STANDARD_DEVIATION_value	0.0025
RESULTS_SEARCH_15_PARAMETERS_MSMS_STANDARD_DEVIATION_type	dalton
RESULTS_SEARCH_15_PARAMETERS_MSMS_STANDARD_DEVIATION_value	0.004
RESULTS_SEARCH_15_PARAMETERS_FASTA_filename	C:\AB SCIEX\ProteinPilot Data\SearchDatabases\2019_UP_Mouse_Con.fasta
RESULTS_SEARCH_15_PARAMETERS_AUTO_CALIBRATION_ms	TRUE
RESULTS_SEARCH_15_PARAMETERS_AUTO_CALIBRATION_msexport	FALSE
RESULTS_SEARCH_15_PARAMETERS_AUTO_CALIBRATION_msms	TRUE
RESULTS_SEARCH_15_PARAMETERS_AUTO_CALIBRATION_msmstolsdratio	3
RESULTS_SEARCH_15_PARAMETERS_AUTO_CALIBRATION_mstolsdratio	11
RESULTS_SEARCH_15_PARAMETERS_AUTO_CALIBRATION_squareroot	FALSE
RESULTS_SEARCH_15_PARAMETERS_AUTO_CALIBRATION_type	dalton
RESULTS_SEARCH_15_PARAMETERS_AUTO_CALIBRATION_MCP_d_s_s_f	0.0666667
RESULTS_SEARCH_15_PARAMETERS_AUTO_CALIBRATION_MCP_d_s_w_f	3
RESULTS_SEARCH_15_PARAMETERS_AUTO_CALIBRATION_MCP_m_f_r_mbc	200
RESULTS_SEARCH_15_PARAMETERS_AUTO_CALIBRATION_MCP_m_m_c	10
RESULTS_SEARCH_15_PARAMETERS_AUTO_CALIBRATION_MCP_m_m_f_s	0.25
RESULTS_SEARCH_15_PARAMETERS_AUTO_CALIBRATION_MCP_m_m_p_f	0.33
RESULTS_SEARCH_15_PARAMETERS_AUTO_CALIBRATION_MCP_m_m_p_rms_f	1
RESULTS_SEARCH_15_PARAMETERS_AUTO_CALIBRATION_MCP_m_p_t_f	1
RESULTS_SEARCH_15_PARAMETERS_AUTO_CALIBRATION_MCP_m_r_h_n_b	15
RESULTS_SEARCH_15_PARAMETERS_AUTO_CALIBRATION_MCP_m_z_n_s	99
RESULTS_SEARCH_15_PARAMETERS_AUTO_CALIBRATION_MCP_m_z_s_mn_f_r	0.0666667
RESULTS_SEARCH_15_PARAMETERS_AUTO_CALIBRATION_MCP_m_z_s_mx_f_r	0.1
RESULTS_SEARCH_15_PARAMETERS_MS_AUTO_CALIBRATION_OUT_avres	1.58277e-12
RESULTS_SEARCH_15_PARAMETERS_MS_AUTO_CALIBRATION_OUT_c0	-0.00123558
RESULTS_SEARCH_15_PARAMETERS_MS_AUTO_CALIBRATION_OUT_c1minus1	-1.32628e-05
RESULTS_SEARCH_15_PARAMETERS_MS_AUTO_CALIBRATION_OUT_c2	0
RESULTS_SEARCH_15_PARAMETERS_MS_AUTO_CALIBRATION_OUT_file	3
RESULTS_SEARCH_15_PARAMETERS_MS_AUTO_CALIBRATION_OUT_partnumber	15
RESULTS_SEARCH_15_PARAMETERS_MS_AUTO_CALIBRATION_OUT_polyorder	1
RESULTS_SEARCH_15_PARAMETERS_MS_AUTO_CALIBRATION_OUT_sample	1
RESULTS_SEARCH_15_PARAMETERS_MS_AUTO_CALIBRATION_OUT_squareroot	FALSE
RESULTS_SEARCH_15_PARAMETERS_MSMS_AUTO_CALIBRATION_OUT_avres	1.08337e-12
RESULTS_SEARCH_15_PARAMETERS_MSMS_AUTO_CALIBRATION_OUT_c0	-0.000592174
RESULTS_SEARCH_15_PARAMETERS_MSMS_AUTO_CALIBRATION_OUT_c1minus1	-1.11057e-05
RESULTS_SEARCH_15_PARAMETERS_MSMS_AUTO_CALIBRATION_OUT_c2	0
RESULTS_SEARCH_15_PARAMETERS_MSMS_AUTO_CALIBRATION_OUT_file	3
RESULTS_SEARCH_15_PARAMETERS_MSMS_AUTO_CALIBRATION_OUT_partnumber	15
RESULTS_SEARCH_15_PARAMETERS_MSMS_AUTO_CALIBRATION_OUT_polyorder	1
RESULTS_SEARCH_15_PARAMETERS_MSMS_AUTO_CALIBRATION_OUT_sample	1
RESULTS_SEARCH_15_PARAMETERS_MSMS_AUTO_CALIBRATION_OUT_squareroot	FALSE
RESULTS_SEARCH_15_PARAMETERS_MAX_PRECURSORS_FRAGLET	5
RESULTS_SEARCH_15_PARAMETERS_MAX_PRECURSORS_TAGLET	1
RESULTS_SEARCH_15_PARAMETERS_PRECURSORS_DR_FRAGLET	10
RESULTS_SEARCH_15_PARAMETERS_PRECURSORS_DR_TAGLET	3
RESULTS_SEARCH_15_PARAMETERS_DEFAULT_CHARGE_STATE_1_charge	1
RESULTS_SEARCH_15_PARAMETERS_DEFAULT_CHARGE_STATE_1_probability	1
RESULTS_SEARCH_15_PARAMETERS_DEFAULT_CHARGE_STATE_2_charge	2
RESULTS_SEARCH_15_PARAMETERS_DEFAULT_CHARGE_STATE_2_probability	1
RESULTS_SEARCH_15_PARAMETERS_DEFAULT_CHARGE_STATE_3_charge	3
RESULTS_SEARCH_15_PARAMETERS_DEFAULT_CHARGE_STATE_3_probability	1
RESULTS_SEARCH_15_PARAMETERS_VERSION	5.0.2.0, 5346
RESULTS_SEARCH_15_PARAMETERS_PARAGON_VERSION	5.0.2.0, 5174
RESULTS_SEARCH_15_PARAMETERS_APPLICATION	ProteinPilot(tm) Software
RESULTS_SEARCH_15_PARAMETERS_PROGROUP_alternativedispositionmaximumfoldprobabilitydrop	100
RESULTS_SEARCH_15_PARAMETERS_PROGROUP_alternativedispositionmaximumfoldscoredrop	2
RESULTS_SEARCH_15_PARAMETERS_PROGROUP_autodiscordantpeptidethreshold	0.3
RESULTS_SEARCH_15_PARAMETERS_PROGROUP_bayesconfidencecalclulation	TRUE
RESULTS_SEARCH_15_PARAMETERS_PROGROUP_calibrateconfidence	TRUE
RESULTS_SEARCH_15_PARAMETERS_PROGROUP_compresspeptides	FALSE
RESULTS_SEARCH_15_PARAMETERS_PROGROUP_confidencepercentthresholdforexcludingothersfromquant	15
RESULTS_SEARCH_15_PARAMETERS_PROGROUP_confidencepercentthresholdforincludingselfinquant	15
RESULTS_SEARCH_15_PARAMETERS_PROGROUP_donotstoremspeaklists	FALSE
RESULTS_SEARCH_15_PARAMETERS_PROGROUP_fasta	C:\AB SCIEX\ProteinPilot Data\SearchDatabases\2019_UP_Mouse_Con.fasta
RESULTS_SEARCH_15_PARAMETERS_PROGROUP_featuregroupminpepconf	0.66
RESULTS_SEARCH_15_PARAMETERS_PROGROUP_featuregroupminups	0.47
RESULTS_SEARCH_15_PARAMETERS_PROGROUP_focusingintersection	4
RESULTS_SEARCH_15_PARAMETERS_PROGROUP_focusingminimummatchconfidence	0.1
RESULTS_SEARCH_15_PARAMETERS_PROGROUP_focusingminunusedprotscore	0.1
RESULTS_SEARCH_15_PARAMETERS_PROGROUP_focusingsubsetcutoff	6
RESULTS_SEARCH_15_PARAMETERS_PROGROUP_intersection	1.3
RESULTS_SEARCH_15_PARAMETERS_PROGROUP_minimummatchconfidencecutoff	0.001
RESULTS_SEARCH_15_PARAMETERS_PROGROUP_minunusedprotscore	0.0458
RESULTS_SEARCH_15_PARAMETERS_PROGROUP_subsetcutoff	2
RESULTS_SEARCH_15_PARAMETERS_PROGROUP_uniprotservicehttpssupported	TRUE
RESULTS_SEARCH_15_PARAMETERS_PROGROUP_unusedprotscorethresholdforexcludingothersfromquant	1.3
RESULTS_SEARCH_15_PARAMETERS_PEAKLIST_count	2430
RESULTS_SEARCH_15_PARAMETERS_PEAKLIST_filenumber	3
RESULTS_SEARCH_15_PARAMETERS_PEAKLIST_original_count	2430
RESULTS_SEARCH_15_PARAMETERS_PEAKLIST_originalfilename	C:\Data\Flores_Mirales\06202019\mus2\06172019_AFlor_Blad_2_A3.mgf
RESULTS_SEARCH_15_PARAMETERS_PEAKLIST_partnumber	15
RESULTS_SEARCH_15_PARAMETERS_QUANT_TYPE_background_correction	FALSE
RESULTS_SEARCH_15_PARAMETERS_QUANT_TYPE_bias_correction	TRUE
RESULTS_SEARCH_15_PARAMETERS_QUANT_TYPE_keep_extreme_peptides_over_fraction	0
RESULTS_SEARCH_15_PARAMETERS_QUANT_TYPE_low_confidence_check	TRUE
RESULTS_SEARCH_15_PARAMETERS_QUANT_TYPE_low_intensity_check	TRUE
RESULTS_SEARCH_15_PARAMETERS_QUANT_TYPE_median_statistic	TRUE
RESULTS_SEARCH_15_PARAMETERS_QUANT_TYPE_mod_check	TRUE
RESULTS_SEARCH_15_PARAMETERS_QUANT_TYPE_quant_threshold	-1
RESULTS_SEARCH_15_PARAMETERS_QUANT_TYPE_quant_threshold_sn	9
RESULTS_SEARCH_15_PARAMETERS_QUANT_TYPE_separate_searches	FALSE
RESULTS_SEARCH_15_PARAMETERS_QUANT_TYPE_shared_msms_check	TRUE
RESULTS_SEARCH_15_PARAMETERS_PARAGON_METHOD_SETTINGS_UI_SAMPLE_TYPE	Identification
RESULTS_SEARCH_15_PARAMETERS_PARAGON_METHOD_SETTINGS_UI_CYS_ALKYLATION	Iodoacetamide
RESULTS_SEARCH_15_PARAMETERS_PARAGON_METHOD_SETTINGS_UI_DIGESTION	Trypsin
RESULTS_SEARCH_15_PARAMETERS_PARAGON_METHOD_SETTINGS_UI_INSTRUMENT	Orbi MS (1-3ppm), Orbi MS/MS
RESULTS_SEARCH_15_PARAMETERS_PARAGON_METHOD_SETTINGS_UI_SEARCH_EFFORT	Rapid
RESULTS_SEARCH_15_PARAMETERS_PARAGON_METHOD_SETTINGS_UI_USER_NAME	ESC308585\MSPF
RESULTS_SEARCH_15_PARAMETERS_PARAGON_METHOD_SETTINGS_UI_MACHINE_NAME	ESC308585
RESULTS_SEARCH_15_PARAMETERS_PARAGON_METHOD_SETTINGS_UI_SEARCH_ID	6.36965e+17
RESULTS_SEARCH_15_PARAMETERS_PARAGON_METHOD_SETTINGS_UI_START_TIME	2019-06-19 13:41:42
RESULTS_SEARCH_15_PARAMETERS_PARAGON_METHOD_SETTINGS_UI_MIN_UNUSED_PROTSCORE	0.0458
RESULTS_SEARCH_15_PARAMETERS_PARAGON_METHOD_SETTINGS_UI_PSPEP	TRUE
RESULTS_SEARCH_16_time_cpu	84156
RESULTS_SEARCH_16_time_duration	84249
RESULTS_SEARCH_16_version	5.0.2.5174
RESULTS_SEARCH_16_xml:id	SEARCH:1:636965485021443360_15
RESULTS_SEARCH_16_PARAMETERS_chemical_data_edited	FALSE
RESULTS_SEARCH_16_PARAMETERS_do_multiprecursor_search	TRUE
RESULTS_SEARCH_16_PARAMETERS_do_reverse_search	TRUE
RESULTS_SEARCH_16_PARAMETERS_max_quant_labels	35
RESULTS_SEARCH_16_PARAMETERS_maxresults	15
RESULTS_SEARCH_16_PARAMETERS_separate_searches	FALSE
RESULTS_SEARCH_16_PARAMETERS_MSTOLERANCE_type	dalton
RESULTS_SEARCH_16_PARAMETERS_MSTOLERANCE_value	0.05
RESULTS_SEARCH_16_PARAMETERS_MSMSTOLERANCE_type	dalton
RESULTS_SEARCH_16_PARAMETERS_MSMSTOLERANCE_value	0.1
RESULTS_SEARCH_16_PARAMETERS_MS_STANDARD_DEVIATION_type	dalton
RESULTS_SEARCH_16_PARAMETERS_MS_STANDARD_DEVIATION_value	0.0025
RESULTS_SEARCH_16_PARAMETERS_MSMS_STANDARD_DEVIATION_type	dalton
RESULTS_SEARCH_16_PARAMETERS_MSMS_STANDARD_DEVIATION_value	0.004
RESULTS_SEARCH_16_PARAMETERS_FASTA_filename	C:\AB SCIEX\ProteinPilot Data\SearchDatabases\2019_UP_Mouse_Con.fasta
RESULTS_SEARCH_16_PARAMETERS_AUTO_CALIBRATION_ms	TRUE
RESULTS_SEARCH_16_PARAMETERS_AUTO_CALIBRATION_msexport	FALSE
RESULTS_SEARCH_16_PARAMETERS_AUTO_CALIBRATION_msms	TRUE
RESULTS_SEARCH_16_PARAMETERS_AUTO_CALIBRATION_msmstolsdratio	3
RESULTS_SEARCH_16_PARAMETERS_AUTO_CALIBRATION_mstolsdratio	11
RESULTS_SEARCH_16_PARAMETERS_AUTO_CALIBRATION_squareroot	FALSE
RESULTS_SEARCH_16_PARAMETERS_AUTO_CALIBRATION_type	dalton
RESULTS_SEARCH_16_PARAMETERS_AUTO_CALIBRATION_MCP_d_s_s_f	0.0666667
RESULTS_SEARCH_16_PARAMETERS_AUTO_CALIBRATION_MCP_d_s_w_f	3
RESULTS_SEARCH_16_PARAMETERS_AUTO_CALIBRATION_MCP_m_f_r_mbc	200
RESULTS_SEARCH_16_PARAMETERS_AUTO_CALIBRATION_MCP_m_m_c	10
RESULTS_SEARCH_16_PARAMETERS_AUTO_CALIBRATION_MCP_m_m_f_s	0.25
RESULTS_SEARCH_16_PARAMETERS_AUTO_CALIBRATION_MCP_m_m_p_f	0.33
RESULTS_SEARCH_16_PARAMETERS_AUTO_CALIBRATION_MCP_m_m_p_rms_f	1
RESULTS_SEARCH_16_PARAMETERS_AUTO_CALIBRATION_MCP_m_p_t_f	1
RESULTS_SEARCH_16_PARAMETERS_AUTO_CALIBRATION_MCP_m_r_h_n_b	15
RESULTS_SEARCH_16_PARAMETERS_AUTO_CALIBRATION_MCP_m_z_n_s	99
RESULTS_SEARCH_16_PARAMETERS_AUTO_CALIBRATION_MCP_m_z_s_mn_f_r	0.0666667
RESULTS_SEARCH_16_PARAMETERS_AUTO_CALIBRATION_MCP_m_z_s_mx_f_r	0.1
RESULTS_SEARCH_16_PARAMETERS_MS_AUTO_CALIBRATION_OUT_avres	-8.76147e-13
RESULTS_SEARCH_16_PARAMETERS_MS_AUTO_CALIBRATION_OUT_c0	-0.00166732
RESULTS_SEARCH_16_PARAMETERS_MS_AUTO_CALIBRATION_OUT_c1minus1	-1.22716e-05
RESULTS_SEARCH_16_PARAMETERS_MS_AUTO_CALIBRATION_OUT_c2	0
RESULTS_SEARCH_16_PARAMETERS_MS_AUTO_CALIBRATION_OUT_file	3
RESULTS_SEARCH_16_PARAMETERS_MS_AUTO_CALIBRATION_OUT_partnumber	16
RESULTS_SEARCH_16_PARAMETERS_MS_AUTO_CALIBRATION_OUT_polyorder	1
RESULTS_SEARCH_16_PARAMETERS_MS_AUTO_CALIBRATION_OUT_sample	1
RESULTS_SEARCH_16_PARAMETERS_MS_AUTO_CALIBRATION_OUT_squareroot	FALSE
RESULTS_SEARCH_16_PARAMETERS_MSMS_AUTO_CALIBRATION_OUT_avres	-1.67063e-13
RESULTS_SEARCH_16_PARAMETERS_MSMS_AUTO_CALIBRATION_OUT_c0	-0.00255164
RESULTS_SEARCH_16_PARAMETERS_MSMS_AUTO_CALIBRATION_OUT_c1minus1	-7.30723e-06
RESULTS_SEARCH_16_PARAMETERS_MSMS_AUTO_CALIBRATION_OUT_c2	0
RESULTS_SEARCH_16_PARAMETERS_MSMS_AUTO_CALIBRATION_OUT_file	3
RESULTS_SEARCH_16_PARAMETERS_MSMS_AUTO_CALIBRATION_OUT_partnumber	16
RESULTS_SEARCH_16_PARAMETERS_MSMS_AUTO_CALIBRATION_OUT_polyorder	1
RESULTS_SEARCH_16_PARAMETERS_MSMS_AUTO_CALIBRATION_OUT_sample	1
RESULTS_SEARCH_16_PARAMETERS_MSMS_AUTO_CALIBRATION_OUT_squareroot	FALSE
RESULTS_SEARCH_16_PARAMETERS_MAX_PRECURSORS_FRAGLET	5
RESULTS_SEARCH_16_PARAMETERS_MAX_PRECURSORS_TAGLET	1
RESULTS_SEARCH_16_PARAMETERS_PRECURSORS_DR_FRAGLET	10
RESULTS_SEARCH_16_PARAMETERS_PRECURSORS_DR_TAGLET	3
RESULTS_SEARCH_16_PARAMETERS_DEFAULT_CHARGE_STATE_1_charge	1
RESULTS_SEARCH_16_PARAMETERS_DEFAULT_CHARGE_STATE_1_probability	1
RESULTS_SEARCH_16_PARAMETERS_DEFAULT_CHARGE_STATE_2_charge	2
RESULTS_SEARCH_16_PARAMETERS_DEFAULT_CHARGE_STATE_2_probability	1
RESULTS_SEARCH_16_PARAMETERS_DEFAULT_CHARGE_STATE_3_charge	3
RESULTS_SEARCH_16_PARAMETERS_DEFAULT_CHARGE_STATE_3_probability	1
RESULTS_SEARCH_16_PARAMETERS_VERSION	5.0.2.0, 5346
RESULTS_SEARCH_16_PARAMETERS_PARAGON_VERSION	5.0.2.0, 5174
RESULTS_SEARCH_16_PARAMETERS_APPLICATION	ProteinPilot(tm) Software
RESULTS_SEARCH_16_PARAMETERS_PROGROUP_alternativedispositionmaximumfoldprobabilitydrop	100
RESULTS_SEARCH_16_PARAMETERS_PROGROUP_alternativedispositionmaximumfoldscoredrop	2
RESULTS_SEARCH_16_PARAMETERS_PROGROUP_autodiscordantpeptidethreshold	0.3
RESULTS_SEARCH_16_PARAMETERS_PROGROUP_bayesconfidencecalclulation	TRUE
RESULTS_SEARCH_16_PARAMETERS_PROGROUP_calibrateconfidence	TRUE
RESULTS_SEARCH_16_PARAMETERS_PROGROUP_compresspeptides	FALSE
RESULTS_SEARCH_16_PARAMETERS_PROGROUP_confidencepercentthresholdforexcludingothersfromquant	15
RESULTS_SEARCH_16_PARAMETERS_PROGROUP_confidencepercentthresholdforincludingselfinquant	1900-01-15
RESULTS_SEARCH_16_PARAMETERS_PROGROUP_donotstoremspeaklists	FALSE
RESULTS_SEARCH_16_PARAMETERS_PROGROUP_fasta	C:\AB SCIEX\ProteinPilot Data\SearchDatabases\2019_UP_Mouse_Con.fasta
RESULTS_SEARCH_16_PARAMETERS_PROGROUP_featuregroupminpepconf	0.66
RESULTS_SEARCH_16_PARAMETERS_PROGROUP_featuregroupminups	0.47
RESULTS_SEARCH_16_PARAMETERS_PROGROUP_focusingintersection	4
RESULTS_SEARCH_16_PARAMETERS_PROGROUP_focusingminimummatchconfidence	0.1
RESULTS_SEARCH_16_PARAMETERS_PROGROUP_focusingminunusedprotscore	0.1
RESULTS_SEARCH_16_PARAMETERS_PROGROUP_focusingsubsetcutoff	6
RESULTS_SEARCH_16_PARAMETERS_PROGROUP_intersection	1.3
RESULTS_SEARCH_16_PARAMETERS_PROGROUP_minimummatchconfidencecutoff	0.001
RESULTS_SEARCH_16_PARAMETERS_PROGROUP_minunusedprotscore	0.0458
RESULTS_SEARCH_16_PARAMETERS_PROGROUP_subsetcutoff	2
RESULTS_SEARCH_16_PARAMETERS_PROGROUP_uniprotservicehttpssupported	TRUE
RESULTS_SEARCH_16_PARAMETERS_PROGROUP_unusedprotscorethresholdforexcludingothersfromquant	1.3
RESULTS_SEARCH_16_PARAMETERS_PEAKLIST_count	2854
RESULTS_SEARCH_16_PARAMETERS_PEAKLIST_filenumber	3
RESULTS_SEARCH_16_PARAMETERS_PEAKLIST_original_count	2854
RESULTS_SEARCH_16_PARAMETERS_PEAKLIST_originalfilename	C:\Data\Flores_Mirales\06202019\mus2\06172019_AFlor_Blad_2_A3.mgf
RESULTS_SEARCH_16_PARAMETERS_PEAKLIST_partnumber	16
RESULTS_SEARCH_16_PARAMETERS_QUANT_TYPE_background_correction	FALSE
RESULTS_SEARCH_16_PARAMETERS_QUANT_TYPE_bias_correction	TRUE
RESULTS_SEARCH_16_PARAMETERS_QUANT_TYPE_keep_extreme_peptides_over_fraction	0
RESULTS_SEARCH_16_PARAMETERS_QUANT_TYPE_low_confidence_check	TRUE
RESULTS_SEARCH_16_PARAMETERS_QUANT_TYPE_low_intensity_check	TRUE
RESULTS_SEARCH_16_PARAMETERS_QUANT_TYPE_median_statistic	TRUE
RESULTS_SEARCH_16_PARAMETERS_QUANT_TYPE_mod_check	TRUE
RESULTS_SEARCH_16_PARAMETERS_QUANT_TYPE_quant_threshold	-1
RESULTS_SEARCH_16_PARAMETERS_QUANT_TYPE_quant_threshold_sn	9
RESULTS_SEARCH_16_PARAMETERS_QUANT_TYPE_separate_searches	FALSE
RESULTS_SEARCH_16_PARAMETERS_QUANT_TYPE_shared_msms_check	TRUE
RESULTS_SEARCH_16_PARAMETERS_PARAGON_METHOD_SETTINGS_UI_SAMPLE_TYPE	Identification
RESULTS_SEARCH_16_PARAMETERS_PARAGON_METHOD_SETTINGS_UI_CYS_ALKYLATION	Iodoacetamide
RESULTS_SEARCH_16_PARAMETERS_PARAGON_METHOD_SETTINGS_UI_DIGESTION	Trypsin
RESULTS_SEARCH_16_PARAMETERS_PARAGON_METHOD_SETTINGS_UI_INSTRUMENT	Orbi MS (1-3ppm), Orbi MS/MS
RESULTS_SEARCH_16_PARAMETERS_PARAGON_METHOD_SETTINGS_UI_SEARCH_EFFORT	Rapid
RESULTS_SEARCH_16_PARAMETERS_PARAGON_METHOD_SETTINGS_UI_USER_NAME	ESC308585\MSPF
RESULTS_SEARCH_16_PARAMETERS_PARAGON_METHOD_SETTINGS_UI_MACHINE_NAME	ESC308585
RESULTS_SEARCH_16_PARAMETERS_PARAGON_METHOD_SETTINGS_UI_SEARCH_ID	6.36965e+17
RESULTS_SEARCH_16_PARAMETERS_PARAGON_METHOD_SETTINGS_UI_START_TIME	2019-06-19 13:41:42
RESULTS_SEARCH_16_PARAMETERS_PARAGON_METHOD_SETTINGS_UI_MIN_UNUSED_PROTSCORE	0.0458
RESULTS_SEARCH_16_PARAMETERS_PARAGON_METHOD_SETTINGS_UI_PSPEP	TRUE
RESULTS_SEARCH_17_time_cpu	84953
RESULTS_SEARCH_17_time_duration	85072
RESULTS_SEARCH_17_version	5.0.2.5174
RESULTS_SEARCH_17_xml:id	SEARCH:1:636965485021443360_16
RESULTS_SEARCH_17_PARAMETERS_chemical_data_edited	FALSE
RESULTS_SEARCH_17_PARAMETERS_do_multiprecursor_search	TRUE
RESULTS_SEARCH_17_PARAMETERS_do_reverse_search	TRUE
RESULTS_SEARCH_17_PARAMETERS_max_quant_labels	35
RESULTS_SEARCH_17_PARAMETERS_maxresults	15
RESULTS_SEARCH_17_PARAMETERS_separate_searches	FALSE
RESULTS_SEARCH_17_PARAMETERS_MSTOLERANCE_type	dalton
RESULTS_SEARCH_17_PARAMETERS_MSTOLERANCE_value	0.05
RESULTS_SEARCH_17_PARAMETERS_MSMSTOLERANCE_type	dalton
RESULTS_SEARCH_17_PARAMETERS_MSMSTOLERANCE_value	0.1
RESULTS_SEARCH_17_PARAMETERS_MS_STANDARD_DEVIATION_type	dalton
RESULTS_SEARCH_17_PARAMETERS_MS_STANDARD_DEVIATION_value	0.0025
RESULTS_SEARCH_17_PARAMETERS_MSMS_STANDARD_DEVIATION_type	dalton
RESULTS_SEARCH_17_PARAMETERS_MSMS_STANDARD_DEVIATION_value	0.004
RESULTS_SEARCH_17_PARAMETERS_FASTA_filename	C:\AB SCIEX\ProteinPilot Data\SearchDatabases\2019_UP_Mouse_Con.fasta
RESULTS_SEARCH_17_PARAMETERS_AUTO_CALIBRATION_ms	TRUE
RESULTS_SEARCH_17_PARAMETERS_AUTO_CALIBRATION_msexport	FALSE
RESULTS_SEARCH_17_PARAMETERS_AUTO_CALIBRATION_msms	TRUE
RESULTS_SEARCH_17_PARAMETERS_AUTO_CALIBRATION_msmstolsdratio	3
RESULTS_SEARCH_17_PARAMETERS_AUTO_CALIBRATION_mstolsdratio	11
RESULTS_SEARCH_17_PARAMETERS_AUTO_CALIBRATION_squareroot	FALSE
RESULTS_SEARCH_17_PARAMETERS_AUTO_CALIBRATION_type	dalton
RESULTS_SEARCH_17_PARAMETERS_AUTO_CALIBRATION_MCP_d_s_s_f	0.0666667
RESULTS_SEARCH_17_PARAMETERS_AUTO_CALIBRATION_MCP_d_s_w_f	3
RESULTS_SEARCH_17_PARAMETERS_AUTO_CALIBRATION_MCP_m_f_r_mbc	200
RESULTS_SEARCH_17_PARAMETERS_AUTO_CALIBRATION_MCP_m_m_c	10
RESULTS_SEARCH_17_PARAMETERS_AUTO_CALIBRATION_MCP_m_m_f_s	0.25
RESULTS_SEARCH_17_PARAMETERS_AUTO_CALIBRATION_MCP_m_m_p_f	0.33
RESULTS_SEARCH_17_PARAMETERS_AUTO_CALIBRATION_MCP_m_m_p_rms_f	1
RESULTS_SEARCH_17_PARAMETERS_AUTO_CALIBRATION_MCP_m_p_t_f	1
RESULTS_SEARCH_17_PARAMETERS_AUTO_CALIBRATION_MCP_m_r_h_n_b	15
RESULTS_SEARCH_17_PARAMETERS_AUTO_CALIBRATION_MCP_m_z_n_s	99
RESULTS_SEARCH_17_PARAMETERS_AUTO_CALIBRATION_MCP_m_z_s_mn_f_r	0.0666667
RESULTS_SEARCH_17_PARAMETERS_AUTO_CALIBRATION_MCP_m_z_s_mx_f_r	0.1
RESULTS_SEARCH_17_PARAMETERS_MS_AUTO_CALIBRATION_OUT_avres	-1.26847e-12
RESULTS_SEARCH_17_PARAMETERS_MS_AUTO_CALIBRATION_OUT_c0	-0.00208865
RESULTS_SEARCH_17_PARAMETERS_MS_AUTO_CALIBRATION_OUT_c1minus1	-1.1565e-05
RESULTS_SEARCH_17_PARAMETERS_MS_AUTO_CALIBRATION_OUT_c2	0
RESULTS_SEARCH_17_PARAMETERS_MS_AUTO_CALIBRATION_OUT_file	3
RESULTS_SEARCH_17_PARAMETERS_MS_AUTO_CALIBRATION_OUT_partnumber	17
RESULTS_SEARCH_17_PARAMETERS_MS_AUTO_CALIBRATION_OUT_polyorder	1
RESULTS_SEARCH_17_PARAMETERS_MS_AUTO_CALIBRATION_OUT_sample	1
RESULTS_SEARCH_17_PARAMETERS_MS_AUTO_CALIBRATION_OUT_squareroot	FALSE
RESULTS_SEARCH_17_PARAMETERS_MSMS_AUTO_CALIBRATION_OUT_avres	1.94396e-12
RESULTS_SEARCH_17_PARAMETERS_MSMS_AUTO_CALIBRATION_OUT_c0	-0.00255865
RESULTS_SEARCH_17_PARAMETERS_MSMS_AUTO_CALIBRATION_OUT_c1minus1	-7.66398e-06
RESULTS_SEARCH_17_PARAMETERS_MSMS_AUTO_CALIBRATION_OUT_c2	0
RESULTS_SEARCH_17_PARAMETERS_MSMS_AUTO_CALIBRATION_OUT_file	3
RESULTS_SEARCH_17_PARAMETERS_MSMS_AUTO_CALIBRATION_OUT_partnumber	17
RESULTS_SEARCH_17_PARAMETERS_MSMS_AUTO_CALIBRATION_OUT_polyorder	1900-01-01
RESULTS_SEARCH_17_PARAMETERS_MSMS_AUTO_CALIBRATION_OUT_sample	1
RESULTS_SEARCH_17_PARAMETERS_MSMS_AUTO_CALIBRATION_OUT_squareroot	FALSE
RESULTS_SEARCH_17_PARAMETERS_MAX_PRECURSORS_FRAGLET	5
RESULTS_SEARCH_17_PARAMETERS_MAX_PRECURSORS_TAGLET	1
RESULTS_SEARCH_17_PARAMETERS_PRECURSORS_DR_FRAGLET	10
RESULTS_SEARCH_17_PARAMETERS_PRECURSORS_DR_TAGLET	3
RESULTS_SEARCH_17_PARAMETERS_DEFAULT_CHARGE_STATE_1_charge	1
RESULTS_SEARCH_17_PARAMETERS_DEFAULT_CHARGE_STATE_1_probability	1
RESULTS_SEARCH_17_PARAMETERS_DEFAULT_CHARGE_STATE_2_charge	2
RESULTS_SEARCH_17_PARAMETERS_DEFAULT_CHARGE_STATE_2_probability	1
RESULTS_SEARCH_17_PARAMETERS_DEFAULT_CHARGE_STATE_3_charge	3
RESULTS_SEARCH_17_PARAMETERS_DEFAULT_CHARGE_STATE_3_probability	1
RESULTS_SEARCH_17_PARAMETERS_VERSION	5.0.2.0, 5346
RESULTS_SEARCH_17_PARAMETERS_PARAGON_VERSION	5.0.2.0, 5174
RESULTS_SEARCH_17_PARAMETERS_APPLICATION	ProteinPilot(tm) Software
RESULTS_SEARCH_17_PARAMETERS_PROGROUP_alternativedispositionmaximumfoldprobabilitydrop	100
RESULTS_SEARCH_17_PARAMETERS_PROGROUP_alternativedispositionmaximumfoldscoredrop	2
RESULTS_SEARCH_17_PARAMETERS_PROGROUP_autodiscordantpeptidethreshold	0.3
RESULTS_SEARCH_17_PARAMETERS_PROGROUP_bayesconfidencecalclulation	TRUE
RESULTS_SEARCH_17_PARAMETERS_PROGROUP_calibrateconfidence	TRUE
RESULTS_SEARCH_17_PARAMETERS_PROGROUP_compresspeptides	FALSE
RESULTS_SEARCH_17_PARAMETERS_PROGROUP_confidencepercentthresholdforexcludingothersfromquant	15
RESULTS_SEARCH_17_PARAMETERS_PROGROUP_confidencepercentthresholdforincludingselfinquant	15
RESULTS_SEARCH_17_PARAMETERS_PROGROUP_donotstoremspeaklists	FALSE
RESULTS_SEARCH_17_PARAMETERS_PROGROUP_fasta	C:\AB SCIEX\ProteinPilot Data\SearchDatabases\2019_UP_Mouse_Con.fasta
RESULTS_SEARCH_17_PARAMETERS_PROGROUP_featuregroupminpepconf	0.66
[truncated: 294 more rows]

## Sheet: Metadata Calculations
	Subsearch	Search string	present		File index down	Part number	Spectra - 'original'	Spectra 'count' - non-empty?	max original Spectra for part	Max non-empty spectra for part	File Index for first only
	1	RESULTS_SEARCH_1_PARAMETERS_PEAKLIST_rawdatafilename		C:\Data\Flores_Mirales\06202019\mus2\06172019_AFlor_Blad_2_A1.mgf	1	1	3872	3872	3872	3872	1
	2	RESULTS_SEARCH_2_PARAMETERS_PEAKLIST_rawdatafilename		C:\Data\Flores_Mirales\06202019\mus2\06172019_AFlor_Blad_2_A1.mgf	1	2	3898	3898	3898	3898
	3	RESULTS_SEARCH_3_PARAMETERS_PEAKLIST_rawdatafilename		C:\Data\Flores_Mirales\06202019\mus2\06172019_AFlor_Blad_2_A1.mgf	1	3	2934	2934	2934	2934
1 if Rapid, 2 if Thor	4	RESULTS_SEARCH_4_PARAMETERS_PEAKLIST_rawdatafilename		C:\Data\Flores_Mirales\06202019\mus2\06172019_AFlor_Blad_2_A1.mgf	1	4	3391	3391	3391	3391
1	5	RESULTS_SEARCH_5_PARAMETERS_PEAKLIST_rawdatafilename		C:\Data\Flores_Mirales\06202019\mus2\06172019_AFlor_Blad_2_A1.mgf	1	5	3795	3795	3795	3795
	6	RESULTS_SEARCH_6_PARAMETERS_PEAKLIST_rawdatafilename		C:\Data\Flores_Mirales\06202019\mus2\06172019_AFlor_Blad_2_A1.mgf	1	6	3902	3902	3902	3902
# Segments	7	RESULTS_SEARCH_7_PARAMETERS_PEAKLIST_rawdatafilename		C:\Data\Flores_Mirales\06202019\mus2\06172019_AFlor_Blad_2_A2.mgf	2	7	3920	3920	3920	3920	2
19	8	RESULTS_SEARCH_8_PARAMETERS_PEAKLIST_rawdatafilename		C:\Data\Flores_Mirales\06202019\mus2\06172019_AFlor_Blad_2_A2.mgf	2	8	3760	3760	3760	3760
(max is 1000 segments)	9	RESULTS_SEARCH_9_PARAMETERS_PEAKLIST_rawdatafilename		C:\Data\Flores_Mirales\06202019\mus2\06172019_AFlor_Blad_2_A2.mgf	2	9	3223	3223	3223	3223
	10	RESULTS_SEARCH_10_PARAMETERS_PEAKLIST_rawdatafilename		C:\Data\Flores_Mirales\06202019\mus2\06172019_AFlor_Blad_2_A2.mgf	2	10	3525	3525	3525	3525
	11	RESULTS_SEARCH_11_PARAMETERS_PEAKLIST_rawdatafilename		C:\Data\Flores_Mirales\06202019\mus2\06172019_AFlor_Blad_2_A2.mgf	2	11	3831	3831	3831	3831
	12	RESULTS_SEARCH_12_PARAMETERS_PEAKLIST_rawdatafilename		C:\Data\Flores_Mirales\06202019\mus2\06172019_AFlor_Blad_2_A2.mgf	2	12	3946	3946	3946	3946
	13	RESULTS_SEARCH_13_PARAMETERS_PEAKLIST_rawdatafilename		C:\Data\Flores_Mirales\06202019\mus2\06172019_AFlor_Blad_2_A3.mgf	3	13	3237	3237	3237	3237	3
	14	RESULTS_SEARCH_14_PARAMETERS_PEAKLIST_rawdatafilename		C:\Data\Flores_Mirales\06202019\mus2\06172019_AFlor_Blad_2_A3.mgf	3	14	2361	2361	2361	2361
	15	RESULTS_SEARCH_15_PARAMETERS_PEAKLIST_rawdatafilename		C:\Data\Flores_Mirales\06202019\mus2\06172019_AFlor_Blad_2_A3.mgf	3	15	2430	2430	2430	2430
	16	RESULTS_SEARCH_16_PARAMETERS_PEAKLIST_rawdatafilename		C:\Data\Flores_Mirales\06202019\mus2\06172019_AFlor_Blad_2_A3.mgf	3	16	2854	2854	2854	2854
	17	RESULTS_SEARCH_17_PARAMETERS_PEAKLIST_rawdatafilename		C:\Data\Flores_Mirales\06202019\mus2\06172019_AFlor_Blad_2_A3.mgf	3	17	3237	3237	3237	3237
	18	RESULTS_SEARCH_18_PARAMETERS_PEAKLIST_rawdatafilename		C:\Data\Flores_Mirales\06202019\mus2\06172019_AFlor_Blad_2_A3.mgf	3	18	3357	3357	3357	3357
	19	RESULTS_SEARCH_19_PARAMETERS_PEAKLIST_rawdatafilename		C:\Data\Flores_Mirales\06202019\mus2\06172019_AFlor_Blad_2_A3.mgf	3	19	3398	3398	3398	3398

## Sheet: Curated Metadata
Group file metadata term	Metadata Description (of raw extracted item)	Use Partial Match	Term in Stream	Derived (Calculated)	Value	Validation check/comments	Conversion type, if done	Conversion factor		Metadata Category	Metadata Description of Final Metadata Item (converted manually, if applicable)	Value
	Group filename			1						Attributes - General	Group filename	06172019_AFlor_Blad_2_A123_R1.group
RESULTS_SEARCH_1_PARAMETERS_PARAGON_METHOD_SETTINGS_UI_START_TIME	Start date		1		2019-06-19 13:41:42					Attributes - General	Start date	2019-06-19 13:41:42
RESULTS_SEARCH_STAT_search_begin_time_clock	Start time		1		2019-06-19 13:41:42					Attributes - General	Start time	2019-06-19 13:41:42
RESULTS_SEARCH_1_PARAMETERS_PARAGON_METHOD_SETTINGS_UI_USER_NAME	User name		1		ESC308585\MSPF					Attributes - General	User name	ESC308585\MSPF
RESULTS_SEARCH_1_xml:id	Internal search identifier number		1	1						Attributes - General	Internal search identifier number
PARAMETERS_PEAKLIST_original_count				1						Attributes - Input data	Number of spectra in search	64871
PARAMETERS_PEAKLIST_count				1						Attributes - Input data	Number of non-empty spectra in search	64871
PARAMETERS_PEAKLIST_filenumber	Number of input files	1	1	1	3					Attributes - Input data	Number of input files	3
RESULTS_SEARCH_1_PARAMETERS_PARAGON_METHOD_SETTINGS_UI_SAMPLE_TYPE	Sample Type		1		Identification					Parameters - User settings	Sample Type	Identification
RESULTS_SEARCH_1_PARAMETERS_PARAGON_METHOD_SETTINGS_UI_CYS_ALKYLATION	Cysteine Alkylation		1		Iodoacetamide					Parameters - User settings	Cysteine Alkylation	Iodoacetamide
RESULTS_SEARCH_1_PARAMETERS_PARAGON_METHOD_SETTINGS_UI_DIGESTION	Digestion		1		Trypsin					Parameters - User settings	Digestion	Trypsin
RESULTS_SEARCH_1_PARAMETERS_PARAGON_METHOD_SETTINGS_UI_SPECIAL_FACTOR	Special Factors									Parameters - User settings	Special Factors
RESULTS_SEARCH_1_PARAMETERS_PARAGON_METHOD_SETTINGS_UI_INSTRUMENT	Instrument		1		Orbi MS (1-3ppm), Orbi MS/MS					Parameters - User settings	Instrument	Orbi MS (1-3ppm), Orbi MS/MS
RESULTS_SEARCH_1_PARAMETERS_PARAGON_METHOD_SETTINGS_UI_SPECIES	Species									Parameters - User settings	Species
RESULTS_SEARCH_1_PARAMETERS_PARAGON_METHOD_SETTINGS_UI_SEARCH_EFFORT	Search Effort		1		Rapid					Parameters - User settings	Search Effort	Rapid
RESULTS_SEARCH_1_PARAMETERS_PARAGON_METHOD_SETTINGS_UI_ID_FOCUS	ID Focus									Parameters - User settings	ID Focus
RESULTS_SEARCH_1_PARAMETERS_PARAGON_METHOD_SETTINGS_UI_MIN_UNUSED_PROTSCORE	Minimum Unused ProtScore		1		0.0458					Parameters - User settings	Minimum Unused ProtScore	0.0458
RESULTS_SEARCH_1_PARAMETERS_PARAGON_METHOD_SETTINGS_UI_PSPEP	FDR Analysis		1		TRUE		Logical to English			Parameters - User settings	FDR Analysis	Yes
	Quantitation						Logical to English			Parameters - User settings	Quantitation
RESULTS_SEARCH_1_PARAMETERS_QUANT_TYPE_background_correction	Background Correction		1		FALSE		Logical to English			Parameters - User settings	Background Correction	No
RESULTS_SEARCH_1_PARAMETERS_QUANT_TYPE_bias_correction	Bias Correction		1		TRUE		Logical to English			Parameters - User settings	Bias Correction	Yes
	Channel to use as denominator in ratios									Parameters - User settings	Channel to use as denominator in ratios
RESULTS_SEARCH_1_PARAMETERS_chemical_data_edited	Modified Data Dictionary or Parameter Translation		1		FALSE		Logical to English			Parameters - User settings	Modified Data Dictionary or Parameter Translation	No
RESULTS_SEARCH_1_PARAMETERS_FASTA_filename	Database filename		1		C:\AB SCIEX\ProteinPilot Data\SearchDatabases\2019_UP_Mouse_Con.fasta					Attributes - Search database	Database filename	C:\AB SCIEX\ProteinPilot Data\SearchDatabases\2019_UP_Mouse_Con.fasta
				1						Attributes - Search database	Number of Proteins in Database	55354
RESULTS_SEARCH_STAT_num_proteins	Number of proteins searched		1		110708					Attributes - Search database	Number of proteins searched	110708
				1						Attributes - Search database	Number of Residues in Database	0
RESULTS_SEARCH_STAT_num_residues	Number of residues searched		1		0					Attributes - Search database	Number of residues searched	0
RESULTS_SEARCH_STAT_computer_memory	RAM (MB)		1		12285					Attributes - Hardware	RAM (MB)	12285
RESULTS_SEARCH_STAT_computer_name	Computer name		1		ESC308585					Attributes - Hardware	Computer name	ESC308585
RESULTS_SEARCH_STAT_number_cores	Number of cores in computer		1		8					Attributes - Hardware	Number of cores in computer	8
RESULTS_SEARCH_STAT_number_processors	Number of threads (double cores if hyperthreading on)		1		8					Attributes - Hardware	Number of threads (double cores if hyperthreading on)	8
RESULTS_SEARCH_STAT_number_licensed_tasks	Number of cores licensed to use		1		2					Attributes - Software environment	Number of cores licensed to use	2
RESULTS_SEARCH_STAT_os	Operating system		1		Windows 7 Ultimate (6.1.7600)					Attributes - Software environment	Operating system	Windows 7 Ultimate (6.1.7600)
RESULTS_SEARCH_1_PARAMETERS_VERSION	ProteinPilot Software Version		1		5.0.2.0, 5346					Attributes - Software environment	ProteinPilot Software Version	5.0.2.0, 5346
RESULTS_SEARCH_1_PARAMETERS_PARAGON_VERSION	Paragon Algorithm Version		1		5.0.2.0, 5174					Attributes - Software environment	Paragon Algorithm Version	5.0.2.0, 5174
RESULTS_SEARCH_1_PARAMETERS_APPLICATION	Application name		1		ProteinPilot(tm) Software					Attributes - Software environment	Application name	ProteinPilot(tm) Software
RESULTS_GROUPRESULTSUMMARY_1_confidence	Confidence of first row in summary statistics ID statistics		1		0.99		Fraction to %	100		Statistics - Protein Summary Table	Percent Confidence of first row in Summary Statistics ID Statistics	99
RESULTS_GROUPRESULTSUMMARY_1_distinctpeptides	Distinct peptides associated with 99% confidence proteins		1		8812					Statistics - Protein Summary Table	Distinct peptides associated with 99% confidence proteins	8812
RESULTS_GROUPRESULTSUMMARY_1_proteinsbeforegroupping	Proteins before grouping (99% confidence)		1		2204					Statistics - Protein Summary Table	Proteins before grouping (99% confidence)	2204
RESULTS_GROUPRESULTSUMMARY_1_proteinsidentified	Proteins detected (99% confidence)		1		860					Statistics - Protein Summary Table	Proteins detected (99% confidence)	860
RESULTS_GROUPRESULTSUMMARY_1_spectraidentified	Spectra associated with 99% confidence proteins		1		23055					Statistics - Protein Summary Table	Spectra associated with 99% confidence proteins	23055
RESULTS_GROUPRESULTSUMMARY_2_confidence	Confidence of second row in Summary Statistics ID statistics		1		0.95		Fraction to %	100		Statistics - Protein Summary Table	Percent Confidence of first row in Summary Statistics ID Statistics	95
RESULTS_GROUPRESULTSUMMARY_2_distinctpeptides	Distinct peptides associated with 95% confidence proteins		1		9268					Statistics - Protein Summary Table	Distinct peptides associated with 95% confidence proteins	9268
RESULTS_GROUPRESULTSUMMARY_2_proteinsbeforegroupping	Proteins before grouping (95% confidence)		1		3276					Statistics - Protein Summary Table	Proteins before grouping (95% confidence)	3276
RESULTS_GROUPRESULTSUMMARY_2_proteinsidentified	Proteins detected (95% confidence)		1		1211					Statistics - Protein Summary Table	Proteins detected (95% confidence)	1211
RESULTS_GROUPRESULTSUMMARY_2_spectraidentified	Spectra associated with 95% confidence proteins		1		23922					Statistics - Protein Summary Table	Spectra associated with 95% confidence proteins	23922
RESULTS_GROUPRESULTSUMMARY_3_confidence	Confidence of third row in summary statistics ID statistics		1		0.66		Fraction to %	100		Statistics - Protein Summary Table	Percent Confidence of first row in Summary Statistics ID Statistics	66
RESULTS_GROUPRESULTSUMMARY_3_distinctpeptides	Distinct peptides associated with 66% confidence proteins		1		9457					Statistics - Protein Summary Table	Distinct peptides associated with 66% confidence proteins	9457
RESULTS_GROUPRESULTSUMMARY_3_proteinsbeforegroupping	Proteins before grouping (66% confidence)		1		3627					Statistics - Protein Summary Table	Proteins before grouping (66% confidence)	3627
RESULTS_GROUPRESULTSUMMARY_3_proteinsidentified	Proteins detected (66% confidence)		1		1331					Statistics - Protein Summary Table	Proteins detected (66% confidence)	1331
RESULTS_GROUPRESULTSUMMARY_3_spectraidentified	Spectra associated with 66% confidence proteins		1		24188					Statistics - Protein Summary Table	Spectra associated with 66% confidence proteins	24188
RESULTS_GROUPRESULTSUMMARY_4_confidence	Confidence of fourth row in Summary Statistics ID statistics		1		0.100088		Fraction to %	100		Statistics - Protein Summary Table	Percent Confidence of first row in Summary Statistics ID Statistics	10.0088
RESULTS_GROUPRESULTSUMMARY_4_distinctpeptides	Distinct peptides associated with 10% confidence proteins		1		9745					Statistics - Protein Summary Table	Distinct peptides associated with 10% confidence proteins	9745
RESULTS_GROUPRESULTSUMMARY_4_proteinsbeforegroupping	Proteins before grouping (10% confidence)		1		4432					Statistics - Protein Summary Table	Proteins before grouping (10% confidence)	4432
RESULTS_GROUPRESULTSUMMARY_4_proteinsidentified	Proteins detected (10% confidence)		1		1535					Statistics - Protein Summary Table	Proteins detected (10% confidence)	1535
RESULTS_GROUPRESULTSUMMARY_4_spectraidentified	Spectra associated with 10% confidence proteins		1		24613					Statistics - Protein Summary Table	Spectra associated with 10% confidence proteins	24613
PARAMETERS_PEAKLIST_partnumber	Number of segments the input data are broken into	1	1	1	19					Parameters - Search Dimension Factors	Number of segments the input data are broken into	19
				1						Parameters - Search Dimension Factors	Number of searches per segment (2 for Thorough, 1 for Rapid)	1
				1						Parameters - Search Dimension Factors	Number of apparent sub-searches in group file	19
RESULTS_SEARCH_1_PARAMETERS_do_reverse_search	Do reversed search		1		TRUE					Parameters - Search Dimension Factors	Do reversed search	TRUE
RESULTS_SEARCH_1_PARAMETERS_QUANT_TYPE_separate_searches	Do separate searches for each plex in MS1 quantitation		1		FALSE					Parameters - Search Dimension Factors	Do separate searches for each plex in MS1 quantitation	FALSE
RESULTS_SEARCH_1_PARAMETERS_maxresults	Maximum number of hypotheses to keep per spectrum		1		15					Parameters - Search Dimension Factors	Maximum number of hypotheses to keep per spectrum	15
RESULTS_SEARCH_1_PARAMETERS_MSTOLERANCE_type	MS1 initial mass error tolerance type		1		dalton					Parameters - Identification - Mass accuracy	MS1 initial mass error tolerance type	dalton
RESULTS_SEARCH_1_PARAMETERS_MSTOLERANCE_value	MS1 initial mass error tolerance value		1		0.05					Parameters - Identification - Mass accuracy	MS1 initial mass error tolerance value	0.05
RESULTS_SEARCH_1_PARAMETERS_MSMSTOLERANCE_type	MS2 initial mass error tolerance type		1		dalton					Parameters - Identification - Mass accuracy	MS2 initial mass error tolerance type	dalton
RESULTS_SEARCH_1_PARAMETERS_MSMSTOLERANCE_value	MS2 initial mass error tolerance value		1		0.1					Parameters - Identification - Mass accuracy	MS2 initial mass error tolerance value	0.1
RESULTS_SEARCH_1_PARAMETERS_MS_STANDARD_DEVIATION_type	MS1 final mass error standard deviation type		1		dalton					Parameters - Identification - Mass accuracy	MS1 final mass error standard deviation type	dalton
RESULTS_SEARCH_1_PARAMETERS_MS_STANDARD_DEVIATION_value	MS1 final mass error standard deviation value		1		0.0025					Parameters - Identification - Mass accuracy	MS1 final mass error standard deviation value	0.0025
RESULTS_SEARCH_1_PARAMETERS_MSMS_STANDARD_DEVIATION_type	MS2 final mass error standard deviation type		1		dalton					Parameters - Identification - Mass accuracy	MS2 final mass error standard deviation type	dalton
RESULTS_SEARCH_1_PARAMETERS_MSMS_STANDARD_DEVIATION_value	MS2 final mass error standard deviation value		1		0.004					Parameters - Identification - Mass accuracy	MS2 final mass error standard deviation value	0.004
RESULTS_SEARCH_1_PARAMETERS_do_multiprecursor_search	Use multi-precursor search function		1		TRUE					Parameters - Identification - Multi-precursor search	Use multi-precursor search function	TRUE
RESULTS_SEARCH_1_PARAMETERS_MAX_PRECURSORS_FRAGLET	Maximum number of different precursor masses to try to match to in the Fraglet stage when doing multi-precursor search		1		5					Parameters - Identification - Multi-precursor search	Maximum number of different precursor masses to try to match to in the Fraglet stage when doing multi-precursor search	5
RESULTS_SEARCH_1_PARAMETERS_PRECURSORS_DR_FRAGLET	Maximum dynamic range gap of secondary precursors vs primary precursor in the Fraglet stage when doing multi-precursor search		1		10					Parameters - Identification - Multi-precursor search	Maximum dynamic range gap of secondary precursors vs primary precursor in the Fraglet stage when doing multi-precursor search	10
RESULTS_SEARCH_1_PARAMETERS_MAX_PRECURSORS_TAGLET	Maximum number of different precursor masses to try to match to in the Taglet stage when doing multi-precursor search		1		1					Parameters - Identification - Multi-precursor search	Maximum number of different precursor masses to try to match to in the Taglet stage when doing multi-precursor search	1
RESULTS_SEARCH_1_PARAMETERS_PRECURSORS_DR_TAGLET	Maximum dynamic range gap of secondary precursors vs primary precursor in the Taglet stage when doing multi-precursor search		1		3					Parameters - Identification - Multi-precursor search	Maximum dynamic range gap of secondary precursors vs primary precursor in the Taglet stage when doing multi-precursor search	3
RESULTS_SEARCH_1_PARAMETERS_DEFAULT_CHARGE_STATE_1_charge	First charge state to consider when precursor z is not determined		1		1					Parameters - Identification - Charge ambiguity	First charge state to consider when precursor z is not determined	1
RESULTS_SEARCH_1_PARAMETERS_DEFAULT_CHARGE_STATE_1_probability	Probability of first charge state to consider when precursor z is not determined		1		1					Parameters - Identification - Charge ambiguity	Probability of first charge state to consider when precursor z is not determined	1
RESULTS_SEARCH_1_PARAMETERS_DEFAULT_CHARGE_STATE_2_charge	Second charge state to consider when precursor z is not determined		1		2					Parameters - Identification - Charge ambiguity	Second charge state to consider when precursor z is not determined	2
RESULTS_SEARCH_1_PARAMETERS_DEFAULT_CHARGE_STATE_2_probability	Probability of second charge state to consider when precursor z is not determined		1		1					Parameters - Identification - Charge ambiguity	Probability of second charge state to consider when precursor z is not determined	1
RESULTS_SEARCH_1_PARAMETERS_DEFAULT_CHARGE_STATE_3_charge	Third charge state to consider when precursor z is not determined		1		3					Parameters - Identification - Charge ambiguity	Third charge state to consider when precursor z is not determined	3
RESULTS_SEARCH_1_PARAMETERS_DEFAULT_CHARGE_STATE_3_probability	Probability of third charge state to consider when precursor z is not determined		1		1					Parameters - Identification - Charge ambiguity	Probability of third charge state to consider when precursor z is not determined	1
RESULTS_SEARCH_1_PARAMETERS_DEFAULT_CHARGE_STATE_4_charge	Fourth charge state to consider when precursor z is not determined									Parameters - Identification - Charge ambiguity	Fourth charge state to consider when precursor z is not determined
RESULTS_SEARCH_1_PARAMETERS_DEFAULT_CHARGE_STATE_4_probability	Probability of fourth charge state to consider when precursor z is not determined									Parameters - Identification - Charge ambiguity	Probability of fourth charge state to consider when precursor z is not determined
RESULTS_SEARCH_1_PARAMETERS_PROGROUP_bayesconfidencecalclulation	Use Bayesian protein confidence calculation		1		TRUE					Parameters - Protein Grouping	Use Bayesian protein confidence calculation	TRUE
RESULTS_SEARCH_1_PARAMETERS_PROGROUP_calibrateconfidence	Use peptide FDR analysis to recalibrate peptide confidences		1		TRUE					Parameters - Protein Grouping	Use peptide FDR analysis to recalibrate peptide confidences	TRUE
RESULTS_SEARCH_1_PARAMETERS_PROGROUP_focusingintersection	In mid-Pro Group, minimum Intersection ProtScore to be in Same Group		1		4					Parameters - Protein Grouping	In mid-Pro Group, minimum Intersection ProtScore to be in Same Group	4
RESULTS_SEARCH_1_PARAMETERS_PROGROUP_focusingminunusedprotscore	In mid-Pro Group, minimum Unused ProtScore to keep a Group		1		0.1					Parameters - Protein Grouping	In mid-Pro Group, minimum Unused ProtScore to keep a Group	0.1
RESULTS_SEARCH_1_PARAMETERS_PROGROUP_focusingsubsetcutoff	In mid-Pro Group, keep competitor proteins with ProtScore units from winner		1		6					Parameters - Protein Grouping	In mid-Pro Group, keep competitor proteins with ProtScore units from winner	6
RESULTS_SEARCH_1_PARAMETERS_PROGROUP_intersection	In final Pro Group, minimum Intersection ProtScore to be in same group		1		1.3					Parameters - Protein Grouping	In final Pro Group, minimum Intersection ProtScore to be in same group	1.3
RESULTS_SEARCH_1_PARAMETERS_PROGROUP_minunusedprotscore	In final Pro Group, minimum Unused ProtScore to keep a group		1		0.0458					Parameters - Protein Grouping	In final Pro Group, minimum Unused ProtScore to keep a group	0.0458
RESULTS_SEARCH_1_PARAMETERS_PROGROUP_subsetcutoff	In final Pro Group, keep competitor proteins with ProtScore units from winner		1		2					Parameters - Protein Grouping	In final Pro Group, keep competitor proteins with ProtScore units from winner	2
RESULTS_SEARCH_1_PARAMETERS_QUANT_TYPE_background_correction	Do isobaric quant background correction algorithm		1		FALSE					Parameters - Quantitation - processing	Do isobaric quant background correction algorithm	FALSE
RESULTS_SEARCH_1_PARAMETERS_QUANT_TYPE_bias_correction	Normalize the central tendency of protein ratios to be unity		1		TRUE					Parameters - Quantitation - processing	Normalize the central tendency of protein ratios to be unity	TRUE
RESULTS_SEARCH_1_PARAMETERS_QUANT_TYPE_median_statistic	Compute protein-level ratios from the median of peptide ratios		1		TRUE					Parameters - Quantitation - processing	Compute protein-level ratios from the median of peptide ratios	TRUE
RESULTS_SEARCH_1_PARAMETERS_QUANT_TYPE_quant_threshold	Quant threshold setting no longer used		1		-1					Parameters - Quantitation - processing	Quant threshold setting no longer used	-1
RESULTS_SEARCH_1_PARAMETERS_QUANT_TYPE_quant_threshold_sn	Use measures for quantitation if signal to noise is greater than		1		9					Parameters - Quantitation - processing	Use measures for quantitation if signal to noise is greater than	9
RESULTS_SEARCH_1_PARAMETERS_max_quant_labels	Maximum number of labels allowed on a peptide for it to be used for quantitation		1		35					Parameters - Quantitation - curation	Maximum number of labels allowed on a peptide for it to be used for quantitation	35
RESULTS_SEARCH_1_PARAMETERS_QUANT_TYPE_keep_extreme_peptides_over_fraction	Include extreme ratios in the protein ratio calculation if the fraction of peptides from a protein having extreme ratios is greater than		1		0					Parameters - Quantitation - curation	Include extreme ratios in the protein ratio calculation if the fraction of peptides from a protein having extreme ratios is greater than	0
RESULTS_SEARCH_1_PARAMETERS_QUANT_TYPE_low_confidence_check	Exclude quantitation data if identification confidence does not pass a threshold value		1		TRUE					Parameters - Quantitation - curation	Exclude quantitation data if identification confidence does not pass a threshold value	TRUE
RESULTS_SEARCH_1_PARAMETERS_QUANT_TYPE_low_intensity_check	Exclude quantitation data if a minimum intensity is not passed		1		TRUE					Parameters - Quantitation - curation	Exclude quantitation data if a minimum intensity is not passed	TRUE
RESULTS_SEARCH_1_PARAMETERS_QUANT_TYPE_mod_check	Exclude quantitation data based on discordant peptide logic		1		TRUE					Parameters - Quantitation - curation	Exclude quantitation data based on discordant peptide logic	TRUE
RESULTS_SEARCH_1_PARAMETERS_QUANT_TYPE_shared_msms_check	Exclude quantitation data using sharing logic		1		TRUE					Parameters - Quantitation - curation	Exclude quantitation data using sharing logic	TRUE
RESULTS_SEARCH_1_PARAMETERS_PROGROUP_unusedprotscorethresholdforexcludingothersfromquant	Minimum protein confidence to consider a protein confident and capable of excluding spectra as shared		1		1.3					Parameters - Quantitation - curation	Minimum protein confidence to consider a protein confident and capable of excluding spectra as shared	1.3
RESULTS_SEARCH_1_PARAMETERS_PROGROUP_confidencepercentthresholdforexcludingothersfromquant	Minimum peptide percent confidence from a confident protein to consider a spectrum shared		1		15					Parameters - Quantitation - curation	Minimum peptide percent confidence from a confident protein to consider a spectrum shared	15
RESULTS_SEARCH_1_PARAMETERS_PROGROUP_confidencepercentthresholdforincludingselfinquant	Minimum peptide confidence to be used for quantitation		1		15					Parameters - Quantitation - curation	Minimum peptide confidence to be used for quantitation	15
RESULTS_SEARCH_1_PARAMETERS_PROGROUP_autodiscordantpeptidethreshold	Consider a peptide discordant if joint feature probability less than		1		0.3					Parameters - Quantitation - curation	Consider a peptide discordant if joint feature probability less than	0.3
RESULTS_SEARCH_1_PARAMETERS_PROGROUP_compresspeptides	Show results only for distinct peptides, suppressing redundancy		1		FALSE					Parameters - Non-functional	Show results only for distinct peptides, suppressing redundancy	FALSE
RESULTS_SEARCH_1_PARAMETERS_PROGROUP_donotstoremspeaklists	Do not store MS1 level data		1		FALSE					Parameters - Non-functional	Do not store MS1 level data	FALSE
RESULTS_SEARCH_STAT_search_begin_time_clock	Start time - Search		1		2019-06-19 13:41:42					Statistics - Processing Times - Start&Stop Clock Times	Start time - Search	2019-06-19 13:41:42
RESULTS_SEARCH_STAT_search_end_time_clock	End time - Search		1		2019-06-19 14:20:39					Statistics - Processing Times - Start&Stop Clock Times	End time - Search	2019-06-19 14:20:39
RESULTS_SEARCH_STAT_stage_searching_begin_time_clock	Start time - Identification algorithm stages		1		2019-06-19 13:43:38					Statistics - Processing Times - Start&Stop Clock Times	Start time - Identification algorithm stages	2019-06-19 13:43:38
RESULTS_SEARCH_STAT_stage_searching_end_time_clock	End time - Identification algorithm stages		1		2019-06-19 14:19:09					Statistics - Processing Times - Start&Stop Clock Times	End time - Identification algorithm stages	2019-06-19 14:19:09
RESULTS_SEARCH_STAT_stage_signal_processing_begin_time_clock	Start time - Signal processing stage		1		2019-06-19 13:41:42					Statistics - Processing Times - Start&Stop Clock Times	Start time - Signal processing stage	2019-06-19 13:41:42
RESULTS_SEARCH_STAT_stage_signal_processing_end_time_clock	End time - Signal processing stage		1		2019-06-19 13:43:37					Statistics - Processing Times - Start&Stop Clock Times	End time - Signal processing stage	2019-06-19 13:43:37
RESULTS_SEARCH_STAT_stage_waiting_begin_time_clock	Start time - Waiting stage		1		2019-06-19 13:43:37					Statistics - Processing Times - Start&Stop Clock Times	Start time - Waiting stage	2019-06-19 13:43:37
RESULTS_SEARCH_STAT_stage_waiting_end_time_clock	End time - Waiting stage		1		2019-06-19 13:43:38					Statistics - Processing Times - Start&Stop Clock Times	End time - Waiting stage	2019-06-19 13:43:38
RESULTS_SEARCH_STAT_task_fraglet_exe_begin_time_clock	Start time - Fraglet Algorithm search stage		1		2019-06-19 13:43:38					Statistics - Processing Times - Start&Stop Clock Times	Start time - Fraglet Algorithm search stage	2019-06-19 13:43:38
RESULTS_SEARCH_STAT_task_fraglet_exe_end_time_clock	End time - Fraglet Algorithm search stage		1		2019-06-19 13:59:38					Statistics - Processing Times - Start&Stop Clock Times	End time - Fraglet Algorithm search stage	2019-06-19 13:59:38
RESULTS_SEARCH_STAT_task_focusing_begin_time_clock	Start time - Mid-Pro Group Algorithm stage									Statistics - Processing Times - Start&Stop Clock Times	Start time - Mid-Pro Group Algorithm stage
RESULTS_SEARCH_STAT_task_focusing_end_time_clock	End time - Mid-Pro Group Algorithm stage									Statistics - Processing Times - Start&Stop Clock Times	End time - Mid-Pro Group Algorithm stage
RESULTS_SEARCH_STAT_task_taglet_exe_begin_time_clock	Start time - Taglet Algorithm search stage									Statistics - Processing Times - Start&Stop Clock Times	Start time - Taglet Algorithm search stage
RESULTS_SEARCH_STAT_task_taglet_exe_end_time_clock	End time - Taglet Algorithm search stage									Statistics - Processing Times - Start&Stop Clock Times	End time - Taglet Algorithm search stage
RESULTS_SEARCH_STAT_task_progroup_begin_time_clock	Start time - Final Pro Group Algorithm stage		1		2019-06-19 13:59:38					Statistics - Processing Times - Start&Stop Clock Times	Start time - Final Pro Group Algorithm stage	2019-06-19 13:59:38
RESULTS_SEARCH_STAT_task_progroup_end_time_clock	End time - Final Pro Group Algorithm stage		1		2019-06-19 14:19:08					Statistics - Processing Times - Start&Stop Clock Times	End time - Final Pro Group Algorithm stage	2019-06-19 14:19:08
RESULTS_SEARCH_STAT_stage_fdr_begin_time_clock	Start time - FDR analysis stage		1		2019-06-19 14:19:09					Statistics - Processing Times - Start&Stop Clock Times	Start time - FDR analysis stage	2019-06-19 14:19:09
RESULTS_SEARCH_STAT_stage_fdr_end_time_clock	End time - FDR analysis stage		1		2019-06-19 14:20:39					Statistics - Processing Times - Start&Stop Clock Times	End time - FDR analysis stage	2019-06-19 14:20:39
RESULTS_SEARCH_STAT_search_time_duration	Clock Time Duration for Full Search (ms)		1		2337476		msec to min	1.66667e-05		Statistics - Processing Times - Duration in Real Clock Times	Clock time duration - Full search (min)	38.9579
RESULTS_SEARCH_STAT_stage_searching_time_duration	Clock Time Duration for Identification Algorithm Stages (ms)		1		2130486		msec to min	1.66667e-05		Statistics - Processing Times - Duration in Real Clock Times	Clock time duration - Identification algorithm stages (min)	35.5081
RESULTS_SEARCH_STAT_stage_signal_processing_time_duration	Clock Time Duration for Waiting Stage (ms)		1		115313		msec to min	1.66667e-05		Statistics - Processing Times - Duration in Real Clock Times	Clock time duration - Signal processing stage (min)	1.92188
RESULTS_SEARCH_STAT_stage_waiting_time_duration	Clock Time Duration for Signal Processing Stage (ms)		1		591		msec to min	1.66667e-05		Statistics - Processing Times - Duration in Real Clock Times	Clock time duration - Waiting stage (min)	0.00985
RESULTS_SEARCH_STAT_task_fraglet_exe_time_duration	Clock Time Duration for Fraglet Algorithm Stage (ms)		1		960474		msec to min	1.66667e-05		Statistics - Processing Times - Duration in Real Clock Times	Clock time duration - Fraglet Algorithm stage (min)	16.0079
RESULTS_SEARCH_STAT_task_focusing_time_duration	Clock Time Duration for Mid-Pro Group Algorithm Stage (ms)						msec to min	1.66667e-05		Statistics - Processing Times - Duration in Real Clock Times	Clock time duration - Mid-Pro Group Algorithm stage (min)
RESULTS_SEARCH_STAT_task_taglet_exe_time_duration	Clock Time Duration for Taglet Algorithm Stage (ms)						msec to min	1.66667e-05		Statistics - Processing Times - Duration in Real Clock Times	Clock time duration - Taglet Algorithm stage (min)
RESULTS_SEARCH_STAT_task_progroup_time_duration	Clock Time Duration for Pro Group Algorithm Stage (ms)		1		1170271		msec to min	1.66667e-05		Statistics - Processing Times - Duration in Real Clock Times	Clock time duration - Pro Group Algorithm stage (min)	19.5045
RESULTS_SEARCH_STAT_stage_fdr_time_duration	Clock Time Duration for FDR Analysis (ms)		1		90211		msec to min	1.66667e-05		Statistics - Processing Times - Duration in Real Clock Times	Clock time duration - FDR Analysis (min)	1.50352
				1						Statistics - Processing Times - Duration in Real Clock Times	Clock time not accounted for in measured stages	0.0102667
	CPU Time Duration for Signal Processing Stage (ms)						msec to min	1.66667e-05		Statistics - Processing Times - Duration in CPU Time	CPU time duration - Signal Processing stage (min)
RESULTS_SEARCH_STAT_task_fraglet_exe_time_cpu	CPU Time Duration for Fraglet Algorithm Stage (ms)		1		1871156		msec to min	1.66667e-05		Statistics - Processing Times - Duration in CPU Time	CPU time duration - Fraglet Algorithm stage (min)	31.1859
RESULTS_SEARCH_STAT_task_focusing_time_cpu	CPU Time Duration for Mid-Pro Group Algorithm Stage (ms)						msec to min	1.66667e-05		Statistics - Processing Times - Duration in CPU Time	CPU time duration - Mid-Pro Group Algorithm stage (min)
RESULTS_SEARCH_STAT_task_taglet_exe_time_cpu	CPU Time Duration for Taglet Algorithm Stage (ms)						msec to min	1.66667e-05		Statistics - Processing Times - Duration in CPU Time	CPU time duration - Taglet Algorithm stage (min)
RESULTS_SEARCH_STAT_task_progroup_time_cpu	CPU Time Duration for Pro Group Algorithm Stage (ms)		1		1256562		msec to min	1.66667e-05		Statistics - Processing Times - Duration in CPU Time	CPU time duration - Pro Group Algorithm stage (min)	20.9427
				1						Statistics - Processing Times - Percent by Stage	Percent of clock time - Identification Algorithm stages	0.911447
				1						Statistics - Processing Times - Percent by Stage	Percent of clock time - Signal Processing stage	0.0493323
				1						Statistics - Processing Times - Percent by Stage	Percent of clock time - Waiting stage	0.000252837
				1						Statistics - Processing Times - Percent by Stage	Percent of clock time - Fraglet Algorithm stage	0.410902
				1						Statistics - Processing Times - Percent by Stage	Percent of clock time - Mid-Pro Group Algorithm stage
				1						Statistics - Processing Times - Percent by Stage	Percent of clock time - Taglet Algorithm stage
				1						Statistics - Processing Times - Percent by Stage	Percent of clock time - Pro Group Algorithm stage	0.500656
				1						Statistics - Processing Times - Percent by Stage	Percent of clock time - FDR Analysis	0.0385933
				1						Statistics - Processing Rate - Clock (Sec/Spectrum)	Clock time rate (sec/spect) - Full Search	0.0360327
				1						Statistics - Processing Rate - Clock (Sec/Spectrum)	Clock time rate (sec/spect) - Identification Algorithm stages	0.0328419
				1						Statistics - Processing Rate - Clock (Sec/Spectrum)	Clock time rate (sec/spect) - Signal processing stage	0.00177757
				1						Statistics - Processing Rate - Clock (Sec/Spectrum)	Clock time rate (sec/spect) - Waiting stage	9.11039e-06
				1						Statistics - Processing Rate - Clock (Sec/Spectrum)	Clock time rate (sec/spect) - Fraglet Algorithm stage	0.0148059
				1						Statistics - Processing Rate - Clock (Sec/Spectrum)	Clock time rate (sec/spect) - Mid-Pro Group Algorithm stage
				1						Statistics - Processing Rate - Clock (Sec/Spectrum)	Clock time rate (sec/spect) - Taglet Algorithm stage
				1						Statistics - Processing Rate - Clock (Sec/Spectrum)	Clock time rate (sec/spect) - Pro Group Algorithm stage	0.01804
				1						Statistics - Processing Rate - Clock (Sec/Spectrum)	Clock time rate (sec/spect) - FDR Analysis	0.00139062
				1						Statistics - Processing Rate - CPU (Sec/Spectrum)	CPU time rate (sec/spect) - Signal processing stage
				1						Statistics - Processing Rate - CPU (Sec/Spectrum)	CPU time rate (sec/spect) - Fraglet Algorithm stage	0.0288443
				1						Statistics - Processing Rate - CPU (Sec/Spectrum)	CPU time rate (sec/spect) - Mid-Pro Group Algorithm stage
				1						Statistics - Processing Rate - CPU (Sec/Spectrum)	CPU time rate (sec/spect) - Taglet Algorithm stage
				1						Statistics - Processing Rate - CPU (Sec/Spectrum)	CPU time rate (sec/spect) - Pro Group Algorithm stage	0.0193702
				1						Statistics - Processing Rate - Clock (Sec/Spectrum/DB Protein)	Clock time rate (sec/spect/DB protein) - Full search	3.25475e-07
				1						Statistics - Processing Rate - Clock (Sec/Spectrum/DB Protein)	Clock time rate (sec/spect/DB protein) - Identification algorithm stages	2.96653e-07
				1						Statistics - Processing Rate - Clock (Sec/Spectrum/DB Protein)	Clock time rate (sec/spect/DB protein) - Signal processing stage	1.60564e-08
				1						Statistics - Processing Rate - Clock (Sec/Spectrum/DB Protein)	Clock time rate (sec/spect/DB protein) - Waiting stage	8.22921e-11
				1						Statistics - Processing Rate - Clock (Sec/Spectrum/DB Protein)	Clock time rate (sec/spect/DB protein) - Fraglet Algorithm stage	1.33738e-07
				1						Statistics - Processing Rate - Clock (Sec/Spectrum/DB Protein)	Clock time rate (sec/spect/DB protein) - Mid-Pro Group Algorithm stage
				1						Statistics - Processing Rate - Clock (Sec/Spectrum/DB Protein)	Clock time rate (sec/spect/DB protein) - Taglet Algorithm stage
				1						Statistics - Processing Rate - Clock (Sec/Spectrum/DB Protein)	Clock time rate (sec/spect/DB protein) - Pro Group Algorithm stage	1.62951e-07
				1						Statistics - Processing Rate - Clock (Sec/Spectrum/DB Protein)	Clock time rate (sec/spect/DB protein) - FDR Analysis	1.25612e-08
				1						Statistics - Processing Rate - CPU (Sec/Spectrum/DB Protein)	CPU time rate (sec/spect/DB protein) - Signal processing stage
				1						Statistics - Processing Rate - CPU (Sec/Spectrum/DB Protein)	CPU time rate (sec/spect/DB protein) - Fraglet Algorithm stage	2.60544e-07
				1						Statistics - Processing Rate - CPU (Sec/Spectrum/DB Protein)	CPU time rate (sec/spect/DB protein) - Mid-Pro Group Algorithm stage
				1						Statistics - Processing Rate - CPU (Sec/Spectrum/DB Protein)	CPU time rate (sec/spect/DB protein) - Taglet Algorithm stage
				1						Statistics - Processing Rate - CPU (Sec/Spectrum/DB Protein)	CPU time rate (sec/spect/DB protein) - Pro Group Algorithm stage	1.74966e-07
				1						Statistics - Extent of Distribution - Fundamental	Distribution factor - CPU vs. clock time - Signal processing stage
				1						Statistics - Extent of Distribution - Fundamental	Distribution factor - CPU vs. clock time - Fraglet Algorithm stage	1.94816
				1						Statistics - Extent of Distribution - Fundamental	Distribution factor - CPU vs. clock time - Mid-Pro Group Algorithm stage
				1						Statistics - Extent of Distribution - Fundamental	Distribution factor - CPU vs. clock time - Taglet Algorithm stage
				1						Statistics - Extent of Distribution - Fundamental	Distribution factor - CPU vs. clock time - Pro Group Algorithm stage	1.07374
				1						Statistics - Extent of Distribution - vs Segments	Ratio of distribution factor to number of search segments - Signal processing stage
				1						Statistics - Extent of Distribution - vs Segments	Ratio of distribution factor to number of search segments - Fraglet Algorithm stage	0.102535
				1						Statistics - Extent of Distribution - vs Segments	Ratio of distribution factor to number of search segments - Mid-Pro Group Algorithm stage
				1						Statistics - Extent of Distribution - vs Segments	Ratio of distribution factor to number of search segments - Taglet Algorithm stage
				1						Statistics - Extent of Distribution - vs Segments	Ratio of distribution factor to number of search segments - Pro Group Algorithm stage	0.0565124
				1						Statistics - Extent of Distribution - vs Licensed Cores	Ratio of distribution factor to number of licensed cores - Signal processing stage
				1						Statistics - Extent of Distribution - vs Licensed Cores	Ratio of distribution factor to number of licensed cores - Fraglet Algorithm stage	0.974079
				1						Statistics - Extent of Distribution - vs Licensed Cores	Ratio of distribution factor to number of licensed cores - Mid-Pro Group Algorithm stage
				1						Statistics - Extent of Distribution - vs Licensed Cores	Ratio of distribution factor to number of licensed cores - Taglet Algorithm stage
				1						Statistics - Extent of Distribution - vs Licensed Cores	Ratio of distribution factor to number of licensed cores - Pro Group Algorithm stage	0.536868
PARAMETERS_PEAKLIST_original_count	Average number of spectra per segment	1	1	1	3414.26					Statistics - Search Segmentation	Average number of spectra per segment	3414.26
PARAMETERS_PEAKLIST_original_count	Standard deviation of number of spectra per segment	1	1	1	494.219					Statistics - Search Segmentation	Standard deviation of number of spectra per segment	494.219
PARAMETERS_PEAKLIST_original_count	Maximum number of spectra per segment	1	1	1	3946					Statistics - Search Segmentation	Maximum number of spectra per segment	3946
PARAMETERS_PEAKLIST_original_count	Minimum number of spectra per segment	1	1	1	2361					Statistics - Search Segmentation	Minimum number of spectra per segment	2361
										Attributes - Input data filenames	Filename of Input File 1	C:\Data\Flores_Mirales\06202019\mus2\06172019_AFlor_Blad_2_A1.mgf
										Attributes - Input data filenames	Filename of Input File 2	C:\Data\Flores_Mirales\06202019\mus2\06172019_AFlor_Blad_2_A2.mgf
										Attributes - Input data filenames	Filename of Input File 3	C:\Data\Flores_Mirales\06202019\mus2\06172019_AFlor_Blad_2_A3.mgf
										Attributes - Input data filenames	Filename of Input File 4
										Attributes - Input data filenames	Filename of Input File 5
										Attributes - Input data filenames	Filename of Input File 6
										Attributes - Input data filenames	Filename of Input File 7
										Attributes - Input data filenames	Filename of Input File 8
										Attributes - Input data filenames	Filename of Input File 9
										Attributes - Input data filenames	Filename of Input File 10
										Attributes - Input data filenames	Filename of Input File 11
										Attributes - Input data filenames	Filename of Input File 12
										Attributes - Input data filenames	Filename of Input File 13
										Attributes - Input data filenames	Filename of Input File 14
										Attributes - Input data filenames	Filename of Input File 15
										Attributes - Input data filenames	Filename of Input File 16
										Attributes - Input data filenames	Filename of Input File 17
										Attributes - Input data filenames	Filename of Input File 18
										Attributes - Input data filenames	Filename of Input File 19
										Attributes - Input data filenames	Filename of Input File 20
										Attributes - Input data filenames	Filename of Input File 21
										Attributes - Input data filenames	Filename of Input File 22
										Attributes - Input data filenames	Filename of Input File 23
										Attributes - Input data filenames	Filename of Input File 24
										Attributes - Input data filenames	Filename of Input File 25
										Attributes - Input data filenames	Filename of Input File 26
										Attributes - Input data filenames	Filename of Input File 27
										Attributes - Input data filenames	Filename of Input File 28
										Attributes - Input data filenames	Filename of Input File 29
										Attributes - Input data filenames	Filename of Input File 30
										Attributes - Input data filenames	Filename of Input File 31
										Attributes - Input data filenames	Filename of Input File 32
										Attributes - Input data filenames	Filename of Input File 33
										Attributes - Input data filenames	Filename of Input File 34
										Attributes - Input data filenames	Filename of Input File 35
										Attributes - Input data filenames	Filename of Input File 36
										Attributes - Input data filenames	Filename of Input File 37
										Attributes - Input data filenames	Filename of Input File 38
										Attributes - Input data filenames	Filename of Input File 39
										Attributes - Input data filenames	Filename of Input File 40
										Attributes - Input data filenames	Filename of Input File 41
										Attributes - Input data filenames	Filename of Input File 42
										Attributes - Input data filenames	Filename of Input File 43
										Attributes - Input data filenames	Filename of Input File 44
										Attributes - Input data filenames	Filename of Input File 45
										Attributes - Input data filenames	Filename of Input File 46
										Attributes - Input data filenames	Filename of Input File 47
										Attributes - Input data filenames	Filename of Input File 48
										Attributes - Input data filenames	Filename of Input File 49
										Attributes - Input data filenames	Filename of Input File 50
										Attributes - Input data filenames	Filename of Input File 51
										Attributes - Input data filenames	Filename of Input File 52
										Attributes - Input data filenames	Filename of Input File 53
										Attributes - Input data filenames	Filename of Input File 54
										Attributes - Input data filenames	Filename of Input File 55
										Attributes - Input data filenames	Filename of Input File 56
										Attributes - Input data filenames	Filename of Input File 57
										Attributes - Input data filenames	Filename of Input File 58
										Attributes - Input data filenames	Filename of Input File 59
										Attributes - Input data filenames	Filename of Input File 60
										Attributes - Input data filenames	Filename of Input File 61
										Attributes - Input data filenames	Filename of Input File 62
										Attributes - Input data filenames	Filename of Input File 63
										Attributes - Input data filenames	Filename of Input File 64
										Attributes - Input data filenames	Filename of Input File 65
										Attributes - Input data filenames	Filename of Input File 66
										Attributes - Input data filenames	Filename of Input File 67
										Attributes - Input data filenames	Filename of Input File 68
										Attributes - Input data filenames	Filename of Input File 69
										Attributes - Input data filenames	Filename of Input File 70
										Attributes - Input data filenames	Filename of Input File 71
										Attributes - Input data filenames	Filename of Input File 72
										Attributes - Input data filenames	Filename of Input File 73
										Attributes - Input data filenames	Filename of Input File 74
										Attributes - Input data filenames	Filename of Input File 75
										Attributes - Input data filenames	Filename of Input File 76
										Attributes - Input data filenames	Filename of Input File 77
										Attributes - Input data filenames	Filename of Input File 78
										Attributes - Input data filenames	Filename of Input File 79
										Attributes - Input data filenames	Filename of Input File 80
										Attributes - Input data filenames	Filename of Input File 81
										Attributes - Input data filenames	Filename of Input File 82
										Attributes - Input data filenames	Filename of Input File 83
										Attributes - Input data filenames	Filename of Input File 84
										Attributes - Input data filenames	Filename of Input File 85
										Attributes - Input data filenames	Filename of Input File 86
										Attributes - Input data filenames	Filename of Input File 87
										Attributes - Input data filenames	Filename of Input File 88
										Attributes - Input data filenames	Filename of Input File 89
										Attributes - Input data filenames	Filename of Input File 90
										Attributes - Input data filenames	Filename of Input File 91
										Attributes - Input data filenames	Filename of Input File 92
										Attributes - Input data filenames	Filename of Input File 93
										Attributes - Input data filenames	Filename of Input File 94
										Attributes - Input data filenames	Filename of Input File 95
										Attributes - Input data filenames	Filename of Input File 96
										Attributes - Input data filenames	Filename of Input File 97
										Attributes - Input data filenames	Filename of Input File 98
										Attributes - Input data filenames	Filename of Input File 99
										Attributes - Input data filenames	Filename of Input File 100
										Attributes - Input data filenames	Filename of Input File 101
										Attributes - Input data filenames	Filename of Input File 102
										Attributes - Input data filenames	Filename of Input File 103
										Attributes - Input data filenames	Filename of Input File 104
										Attributes - Input data filenames	Filename of Input File 105
										Attributes - Input data filenames	Filename of Input File 106
										Attributes - Input data filenames	Filename of Input File 107
										Attributes - Input data filenames	Filename of Input File 108
										Attributes - Input data filenames	Filename of Input File 109
										Attributes - Input data filenames	Filename of Input File 110
										Attributes - Input data filenames	Filename of Input File 111
										Attributes - Input data filenames	Filename of Input File 112
										Attributes - Input data filenames	Filename of Input File 113
										Attributes - Input data filenames	Filename of Input File 114
										Attributes - Input data filenames	Filename of Input File 115
										Attributes - Input data filenames	Filename of Input File 116
										Attributes - Input data filenames	Filename of Input File 117
										Attributes - Input data filenames	Filename of Input File 118
										Attributes - Input data filenames	Filename of Input File 119
										Attributes - Input data filenames	Filename of Input File 120
										Attributes - Input data filenames	Filename of Input File 121
										Attributes - Input data filenames	Filename of Input File 122
										Attributes - Input data filenames	Filename of Input File 123
										Attributes - Input data filenames	Filename of Input File 124
										Attributes - Input data filenames	Filename of Input File 125
										Attributes - Input data filenames	Filename of Input File 126
										Attributes - Input data filenames	Filename of Input File 127
										Attributes - Input data filenames	Filename of Input File 128
										Attributes - Input data filenames	Filename of Input File 129
										Attributes - Input data filenames	Filename of Input File 130
										Attributes - Input data filenames	Filename of Input File 131
										Attributes - Input data filenames	Filename of Input File 132
										Attributes - Input data filenames	Filename of Input File 133
										Attributes - Input data filenames	Filename of Input File 134
										Attributes - Input data filenames	Filename of Input File 135
										Attributes - Input data filenames	Filename of Input File 136
										Attributes - Input data filenames	Filename of Input File 137
										Attributes - Input data filenames	Filename of Input File 138
										Attributes - Input data filenames	Filename of Input File 139
										Attributes - Input data filenames	Filename of Input File 140
										Attributes - Input data filenames	Filename of Input File 141
										Attributes - Input data filenames	Filename of Input File 142
										Attributes - Input data filenames	Filename of Input File 143
										Attributes - Input data filenames	Filename of Input File 144
										Attributes - Input data filenames	Filename of Input File 145
										Attributes - Input data filenames	Filename of Input File 146
										Attributes - Input data filenames	Filename of Input File 147
										Attributes - Input data filenames	Filename of Input File 148
										Attributes - Input data filenames	Filename of Input File 149
										Attributes - Input data filenames	Filename of Input File 150
										Attributes - Input data filenames	Filename of Input File 151
										Attributes - Input data filenames	Filename of Input File 152
										Attributes - Input data filenames	Filename of Input File 153
										Attributes - Input data filenames	Filename of Input File 154
										Attributes - Input data filenames	Filename of Input File 155
										Attributes - Input data filenames	Filename of Input File 156
										Attributes - Input data filenames	Filename of Input File 157
										Attributes - Input data filenames	Filename of Input File 158
										Attributes - Input data filenames	Filename of Input File 159
										Attributes - Input data filenames	Filename of Input File 160
										Attributes - Input data filenames	Filename of Input File 161
										Attributes - Input data filenames	Filename of Input File 162
										Attributes - Input data filenames	Filename of Input File 163
										Attributes - Input data filenames	Filename of Input File 164
										Attributes - Input data filenames	Filename of Input File 165
										Attributes - Input data filenames	Filename of Input File 166
										Attributes - Input data filenames	Filename of Input File 167
										Attributes - Input data filenames	Filename of Input File 168
										Attributes - Input data filenames	Filename of Input File 169
										Attributes - Input data filenames	Filename of Input File 170
										Attributes - Input data filenames	Filename of Input File 171
										Attributes - Input data filenames	Filename of Input File 172
										Attributes - Input data filenames	Filename of Input File 173
										Attributes - Input data filenames	Filename of Input File 174
										Attributes - Input data filenames	Filename of Input File 175
										Attributes - Input data filenames	Filename of Input File 176
										Attributes - Input data filenames	Filename of Input File 177
										Attributes - Input data filenames	Filename of Input File 178
										Attributes - Input data filenames	Filename of Input File 179
										Attributes - Input data filenames	Filename of Input File 180
										Attributes - Input data filenames	Filename of Input File 181
										Attributes - Input data filenames	Filename of Input File 182
										Attributes - Input data filenames	Filename of Input File 183
										Attributes - Input data filenames	Filename of Input File 184
										Attributes - Input data filenames	Filename of Input File 185
										Attributes - Input data filenames	Filename of Input File 186
										Attributes - Input data filenames	Filename of Input File 187
										Attributes - Input data filenames	Filename of Input File 188
										Attributes - Input data filenames	Filename of Input File 189
										Attributes - Input data filenames	Filename of Input File 190
										Attributes - Input data filenames	Filename of Input File 191
										Attributes - Input data filenames	Filename of Input File 192
										Attributes - Input data filenames	Filename of Input File 193
										Attributes - Input data filenames	Filename of Input File 194
										Attributes - Input data filenames	Filename of Input File 195
										Attributes - Input data filenames	Filename of Input File 196
										Attributes - Input data filenames	Filename of Input File 197
										Attributes - Input data filenames	Filename of Input File 198
										Attributes - Input data filenames	Filename of Input File 199
										Attributes - Input data filenames	Filename of Input File 200

## Sheet: Protein Level Data
Protein Level Data	Unused ProtScore Threshold	Confidence Threshold	Forward	Reverse	Correct	Incorrect	Total	Global FDR	q-value	Fit Unused ProtScore Threshold	Fit Confidence Threshold	Fit Forward	Fit Reverse	Fit Correct	Fit Incorrect	Fit Total	Fit Global FDR	Fit Local FDR
	419.81	1	1	0	1	0	1	0	0	419.81	1	0.99998	2.0417e-05	0.999959	4.08341e-05	1	4.08341e-05	4.08346e-05
	277.45	1	2	0	2	0	2	0	0	277.45	1	1.99996	4.08346e-05	1.99992	8.16691e-05	2	4.08346e-05	4.08351e-05
	258.65	1	3	0	3	0	3	0	0	258.65	1	2.99994	6.12526e-05	2.99988	0.000122505	3	4.08351e-05	4.0836e-05
	173.66	1	4	0	4	0	4	0	0	173.66	1	3.99992	8.16711e-05	3.99984	0.000163342	4	4.08355e-05	4.0837e-05
	130.32	1	5	0	5	0	5	0	0	130.32	1	4.9999	0.00010209	4.9998	0.00020418	5	4.0836e-05	4.0838e-05
	128.98	1	6	0	6	0	6	0	0	128.98	1	5.99988	0.00012251	5.99975	0.000245019	6	4.08365e-05	4.08389e-05
	99.92	1	7	0	7	0	7	0	0	99.92	1	6.99986	0.00014293	6.99971	0.000285859	7	4.0837e-05	4.08399e-05
	99.79	1	8	0	8	0	8	0	0	99.79	1	7.99984	0.00016335	7.99967	0.0003267	8	4.08375e-05	4.08409e-05
	98.9	1	9	0	9	0	9	0	0	98.9	1	8.99982	0.000183771	8.99963	0.000367542	9	4.0838e-05	4.08419e-05
	97.61	1	10	0	10	0	10	0	0	97.61	1	9.9998	0.000204192	9.99959	0.000408385	10	4.08385e-05	4.08428e-05
	91.59	1	11	0	11	0	11	0	0	91.59	1	10.9998	0.000224614	10.9996	0.000449228	11	4.08389e-05	4.08438e-05
	91.13	1	12	0	12	0	12	0	0	91.13	1	11.9998	0.000245037	11.9995	0.000490073	12	4.08394e-05	4.08448e-05
	90.12	1	13	0	13	0	13	0	0	90.12	1	12.9997	0.000265459	12.9995	0.000530919	13	4.08399e-05	4.08457e-05
	88.11	1	14	0	14	0	14	0	0	88.11	1	13.9997	0.000285883	13.9994	0.000571766	14	4.08404e-05	4.08467e-05
	66.94	1	15	0	15	0	15	0	0	66.94	1	14.9997	0.000306307	14.9994	0.000612613	15	4.08409e-05	4.08477e-05
	66.77	1	16	0	16	0	16	0	0	66.77	1	15.9997	0.000326731	15.9993	0.000653462	16	4.08414e-05	4.08487e-05
	66.19	1	17	0	17	0	17	0	0	66.19	1	16.9997	0.000347156	16.9993	0.000694312	17	4.08419e-05	4.08496e-05
	64.63	1	18	0	18	0	18	0	0	64.63	1	17.9996	0.000367581	17.9993	0.000735162	18	4.08423e-05	4.08506e-05
	63.55	1	19	0	19	0	19	0	0	63.55	1	18.9996	0.000388007	18.9992	0.000776014	19	4.08428e-05	4.08516e-05
	62.02	1	20	0	20	0	20	0	0	62.02	1	19.9996	0.000408433	19.9992	0.000816866	20	4.08433e-05	4.08526e-05
	61.8	1	21	0	21	0	21	0	0	61.8	1	20.9996	0.00042886	20.9991	0.00085772	21	4.08438e-05	4.08535e-05
	61.37	1	22	0	22	0	22	0	0	61.37	1	21.9996	0.000449287	21.9991	0.000898574	22	4.08443e-05	4.08545e-05
	60.8	1	23	0	23	0	23	0	0	60.8	1	22.9995	0.000469715	22.9991	0.00093943	23	4.08448e-05	4.08555e-05
	59.78	1	24	0	24	0	24	0	0	59.78	1	23.9995	0.000490143	23.999	0.000980286	24	4.08453e-05	4.08564e-05
	59.14	1	25	0	25	0	25	0	0	59.14	1	24.9995	0.000510572	24.999	0.00102114	25	4.08457e-05	4.08574e-05
	58.47	1	26	0	26	0	26	0	0	58.47	1	25.9995	0.000531001	25.9989	0.001062	26	4.08462e-05	4.08584e-05
	57.39	1	27	0	27	0	27	0	0	57.39	1	26.9994	0.000551431	26.9989	0.00110286	27	4.08467e-05	4.08594e-05
	57.35	1	28	0	28	0	28	0	0	57.35	1	27.9994	0.000571861	27.9989	0.00114372	28	4.08472e-05	4.08603e-05
	54.53	1	29	0	29	0	29	0	0	54.53	1	28.9994	0.000592292	28.9988	0.00118458	29	4.08477e-05	4.08613e-05
	54.15	1	30	0	30	0	30	0	0	54.15	1	29.9994	0.000612723	29.9988	0.00122545	30	4.08482e-05	4.08623e-05
	51.85	1	31	0	31	0	31	0	0	51.85	1	30.9994	0.000633154	30.9987	0.00126631	31	4.08487e-05	4.08632e-05
	49.91	1	32	0	32	0	32	0	0	49.91	1	31.9993	0.000653586	31.9987	0.00130717	32	4.08492e-05	4.08642e-05
	48.7	1	33	0	33	0	33	0	0	48.7	1	32.9993	0.000674019	32.9987	0.00134804	33	4.08496e-05	4.08652e-05
	47.95	1	34	0	34	0	34	0	0	47.95	1	33.9993	0.000694452	33.9986	0.0013889	34	4.08501e-05	4.08662e-05
	46.58	1	35	0	35	0	35	0	0	46.58	1	34.9993	0.000714886	34.9986	0.00142977	35	4.08506e-05	4.08671e-05
	45.9	1	36	0	36	0	36	0	0	45.9	1	35.9993	0.00073532	35.9985	0.00147064	36	4.08511e-05	4.08681e-05
	45.68	1	37	0	37	0	37	0	0	45.68	1	36.9992	0.000755754	36.9985	0.00151151	37	4.08516e-05	4.08691e-05
	45.48	1	38	0	38	0	38	0	0	45.48	1	37.9992	0.000776189	37.9984	0.00155238	38	4.08521e-05	4.08701e-05
	45.3	1	39	0	39	0	39	0	0	45.3	1	38.9992	0.000796625	38.9984	0.00159325	39	4.08526e-05	4.0871e-05
	44.37	1	40	0	40	0	40	0	0	44.37	1	39.9992	0.000817061	39.9984	0.00163412	40	4.0853e-05	4.0872e-05
	42.5	1	41	0	41	0	41	0	0	42.5	1	40.9992	0.000837497	40.9983	0.00167499	41	4.08535e-05	4.0873e-05
	42.24	1	42	0	42	0	42	0	0	42.24	1	41.9991	0.000857934	41.9983	0.00171587	42	4.0854e-05	4.08739e-05
	41.91	1	43	0	43	0	43	0	0	41.91	1	42.9991	0.000878372	42.9982	0.00175674	43	4.08545e-05	4.08749e-05
	41.73	1	44	0	44	0	44	0	0	41.73	1	43.9991	0.00089881	43.9982	0.00179762	44	4.0855e-05	4.08759e-05
	41.35	1	45	0	45	0	45	0	0	41.35	1	44.9991	0.000919248	44.9982	0.0018385	45	4.08555e-05	4.08769e-05
	39.89	1	46	0	46	0	46	0	0	39.89	1	45.9991	0.000939687	45.9981	0.00187937	46	4.0856e-05	4.08778e-05
	39.82	1	47	0	47	0	47	0	0	39.82	1	46.999	0.000960126	46.9981	0.00192025	47	4.08564e-05	4.08788e-05
	39.09	1	48	0	48	0	48	0	0	39.09	1	47.999	0.000980566	47.998	0.00196113	48	4.08569e-05	4.08798e-05
	38.86	1	49	0	49	0	49	0	0	38.86	1	48.999	0.00100101	48.998	0.00200201	49	4.08574e-05	4.08808e-05
	38.55	1	50	0	50	0	50	0	0	38.55	1	49.999	0.00102145	49.998	0.0020429	50	4.08579e-05	4.08817e-05
	37.67	1	51	0	51	0	51	0	0	37.67	1	50.999	0.00104189	50.9979	0.00208378	51	4.08584e-05	4.08827e-05
	37.57	1	52	0	52	0	52	0	0	37.57	1	51.9989	0.00106233	51.9979	0.00212466	52	4.08589e-05	4.08837e-05
	37.21	1	53	0	53	0	53	0	0	37.21	1	52.9989	0.00108277	52.9978	0.00216555	53	4.08594e-05	4.08846e-05
	36.91	1	54	0	54	0	54	0	0	36.91	1	53.9989	0.00110322	53.9978	0.00220643	54	4.08598e-05	4.08856e-05
	36.52	1	55	0	55	0	55	0	0	36.52	1	54.9989	0.00112366	54.9978	0.00224732	55	4.08603e-05	4.08866e-05
	35.92	1	56	0	56	0	56	0	0	35.92	1	55.9989	0.0011441	55.9977	0.00228821	56	4.08608e-05	4.08876e-05
	35.76	1	57	0	57	0	57	0	0	35.76	1	56.9988	0.00116455	56.9977	0.00232909	57	4.08613e-05	4.08885e-05
	35.38	1	58	0	58	0	58	0	0	35.38	1	57.9988	0.00118499	57.9976	0.00236998	58	4.08618e-05	4.08895e-05
	34.94	1	59	0	59	0	59	0	0	34.94	1	58.9988	0.00120544	58.9976	0.00241087	59	4.08623e-05	4.08905e-05
	33.65	1	60	0	60	0	60	0	0	33.65	1	59.9988	0.00122588	59.9975	0.00245177	60	4.08628e-05	4.08915e-05
	33.54	1	61	0	61	0	61	0	0	33.54	1	60.9988	0.00124633	60.9975	0.00249266	61	4.08633e-05	4.08924e-05
	33.42	1	62	0	62	0	62	0	0	33.42	1	61.9987	0.00126678	61.9975	0.00253355	62	4.08637e-05	4.08934e-05
	33.29	1	63	0	63	0	63	0	0	33.29	1	62.9987	0.00128722	62.9974	0.00257445	63	4.08642e-05	4.08944e-05
	32.98	1	64	0	64	0	64	0	0	32.98	1	63.9987	0.00130767	63.9974	0.00261534	64	4.08647e-05	4.08953e-05
	32.69	1	65	0	65	0	65	0	0	32.69	1	64.9987	0.00132812	64.9973	0.00265624	65	4.08652e-05	4.08963e-05
	32.6	1	66	0	66	0	66	0	0	32.6	1	65.9987	0.00134857	65.9973	0.00269714	66	4.08657e-05	4.08973e-05
	32.55	1	67	0	67	0	67	0	0	32.55	1	66.9986	0.00136902	66.9973	0.00273803	67	4.08662e-05	4.08983e-05
	32.39	1	68	0	68	0	68	0	0	32.39	1	67.9986	0.00138947	67.9972	0.00277893	68	4.08667e-05	4.08992e-05
	31.21	1	69	0	69	0	69	0	0	31.21	1	68.9986	0.00140992	68.9972	0.00281983	69	4.08671e-05	4.09002e-05
	30.88	1	70	0	70	0	70	0	0	30.88	1	69.9986	0.00143037	69.9971	0.00286073	70	4.08676e-05	4.09012e-05
	30.82	1	71	0	71	0	71	0	0	30.82	1	70.9985	0.00145082	70.9971	0.00290164	71	4.08681e-05	4.09022e-05
	30.15	1	72	0	72	0	72	0	0	30.15	1	71.9985	0.00147127	71.9971	0.00294254	72	4.08686e-05	4.09031e-05
	29.99	1	73	0	73	0	73	0	0	29.99	1	72.9985	0.00149172	72.997	0.00298344	73	4.08691e-05	4.09041e-05
	29.85	1	74	0	74	0	74	0	0	29.85	1	73.9985	0.00151217	73.997	0.00302435	74	4.08696e-05	4.09051e-05
	29.67	1	75	0	75	0	75	0	0	29.67	1	74.9985	0.00153263	74.9969	0.00306525	75	4.08701e-05	4.09061e-05
	29.37	1	76	0	76	0	76	0	0	29.37	1	75.9984	0.00155308	75.9969	0.00310616	76	4.08705e-05	4.0907e-05
	28.95	1	77	0	77	0	77	0	0	28.95	1	76.9984	0.00157353	76.9969	0.00314707	77	4.0871e-05	4.0908e-05
	28.24	1	78	0	78	0	78	0	0	28.24	1	77.9984	0.00159399	77.9968	0.00318798	78	4.08715e-05	4.0909e-05
	28.08	1	79	0	79	0	79	0	0	28.08	1	78.9984	0.00161444	78.9968	0.00322889	79	4.0872e-05	4.09099e-05
	28	1	80	0	80	0	80	0	0	28	1	79.9984	0.0016349	79.9967	0.0032698	80	4.08725e-05	4.09109e-05
	27.95	1	81	0	81	0	81	0	0	27.95	1	80.9983	0.00165536	80.9967	0.00331071	81	4.0873e-05	4.09119e-05
	27.65	1	82	0	82	0	82	0	0	27.65	1	81.9983	0.00167581	81.9966	0.00335162	82	4.08735e-05	4.09129e-05
	27.33	1	83	0	83	0	83	0	0	27.33	1	82.9983	0.00169627	82.9966	0.00339254	83	4.0874e-05	4.09138e-05
	27.24	1	84	0	84	0	84	0	0	27.24	1	83.9983	0.00171673	83.9966	0.00343345	84	4.08744e-05	4.09148e-05
	26.82	1	85	0	85	0	85	0	0	26.82	1	84.9983	0.00173718	84.9965	0.00347437	85	4.08749e-05	4.09158e-05
	26.67	1	86	0	86	0	86	0	0	26.67	1	85.9982	0.00175764	85.9965	0.00351529	86	4.08754e-05	4.09168e-05
	26.49	1	87	0	87	0	87	0	0	26.49	1	86.9982	0.0017781	86.9964	0.0035562	87	4.08759e-05	4.09177e-05
	26.31	1	88	0	88	0	88	0	0	26.31	1	87.9982	0.00179856	87.9964	0.00359712	88	4.08764e-05	4.09187e-05
	26.23	1	89	0	89	0	89	0	0	26.23	1	88.9982	0.00181902	88.9964	0.00363804	89	4.08769e-05	4.09197e-05
	26.12	1	90	0	90	0	90	0	0	26.12	1	89.9982	0.00183948	89.9963	0.00367896	90	4.08774e-05	4.09207e-05
	25.66	1	91	0	91	0	91	0	0	25.66	1	90.9981	0.00185994	90.9963	0.00371988	91	4.08778e-05	4.09216e-05
	25.57	1	92	0	92	0	92	0	0	25.57	1	91.9981	0.0018804	91.9962	0.00376081	92	4.08783e-05	4.09226e-05
	25.45	1	93	0	93	0	93	0	0	25.45	1	92.9981	0.00190086	92.9962	0.00380173	93	4.08788e-05	4.09236e-05
	25.31	1	94	0	94	0	94	0	0	25.31	1	93.9981	0.00192133	93.9962	0.00384265	94	4.08793e-05	4.09246e-05
	24.85	1	95	0	95	0	95	0	0	24.85	1	94.9981	0.00194179	94.9961	0.00388358	95	4.08798e-05	4.09255e-05
	24.71	1	96	0	96	0	96	0	0	24.71	1	95.998	0.00196225	95.9961	0.00392451	96	4.08803e-05	4.09265e-05
	24.69	1	97	0	97	0	97	0	0	24.69	1	96.998	0.00198272	96.996	0.00396543	97	4.08808e-05	4.09275e-05
	24.63	1	98	0	98	0	98	0	0	24.63	1	97.998	0.00200318	97.996	0.00400636	98	4.08812e-05	4.09284e-05
	24.49	1	99	0	99	0	99	0	0	24.49	1	98.998	0.00202365	98.996	0.00404729	99	4.08817e-05	4.09294e-05
	24.29	1	100	0	100	0	100	0	0	24.29	1	99.998	0.00204411	99.9959	0.00408822	100	4.08822e-05	4.09304e-05
	24.27	1	101	0	101	0	101	0	0	24.27	1	100.998	0.00206458	100.996	0.00412915	101	4.08827e-05	4.09314e-05
	24.23	1	102	0	102	0	102	0	0	24.23	1	101.998	0.00208504	101.996	0.00417009	102	4.08832e-05	4.09323e-05
	24.03	1	103	0	103	0	103	0	0	24.03	1	102.998	0.00210551	102.996	0.00421102	103	4.08837e-05	4.09333e-05
	23.9	1	104	0	104	0	104	0	0	23.9	1	103.998	0.00212598	103.996	0.00425195	104	4.08842e-05	4.09343e-05
	23.74	1	105	0	105	0	105	0	0	23.74	1	104.998	0.00214644	104.996	0.00429289	105	4.08847e-05	4.09353e-05
	23.22	1	106	0	106	0	106	0	0	23.22	1	105.998	0.00216691	105.996	0.00433383	106	4.08851e-05	4.09362e-05
	23.2	1	107	0	107	0	107	0	0	23.2	1	106.998	0.00218738	106.996	0.00437476	107	4.08856e-05	4.09372e-05
	23.05	1	108	0	108	0	108	0	0	23.05	1	107.998	0.00220785	107.996	0.0044157	108	4.08861e-05	4.09382e-05
	22.96	1	109	0	109	0	109	0	0	22.96	1	108.998	0.00222832	108.996	0.00445664	109	4.08866e-05	4.09392e-05
	22.74	1	110	0	110	0	110	0	0	22.74	1	109.998	0.00224879	109.996	0.00449758	110	4.08871e-05	4.09401e-05
	22.54	1	111	0	111	0	111	0	0	22.54	1	110.998	0.00226926	110.995	0.00453852	111	4.08876e-05	4.09411e-05
	22.51	1	112	0	112	0	112	0	0	22.51	1	111.998	0.00228973	111.995	0.00457946	112	4.08881e-05	4.09421e-05
	22.5	1	113	0	113	0	113	0	0	22.5	1	112.998	0.0023102	112.995	0.00462041	113	4.08885e-05	4.09431e-05
	22.47	1	114	0	114	0	114	0	0	22.47	1	113.998	0.00233068	113.995	0.00466135	114	4.0889e-05	4.0944e-05
	22.21	1	115	0	115	0	115	0	0	22.21	1	114.998	0.00235115	114.995	0.0047023	115	4.08895e-05	4.0945e-05
	21.97	1	116	0	116	0	116	0	0	21.97	1	115.998	0.00237162	115.995	0.00474324	116	4.089e-05	4.0946e-05
	21.96	1	117	0	117	0	117	0	0	21.96	1	116.998	0.00239209	116.995	0.00478419	117	4.08905e-05	4.0947e-05
	21.9	1	118	0	118	0	118	0	0	21.9	1	117.998	0.00241257	117.995	0.00482514	118	4.0891e-05	4.09479e-05
	21.85	1	119	0	119	0	119	0	0	21.85	1	118.998	0.00243304	118.995	0.00486608	119	4.08915e-05	4.09489e-05
	21.62	1	120	0	120	0	120	0	0	21.62	1	119.998	0.00245352	119.995	0.00490703	120	4.0892e-05	4.09499e-05
	21.51	1	121	0	121	0	121	0	0	21.51	1	120.998	0.00247399	120.995	0.00494799	121	4.08924e-05	4.09509e-05
	21.33	1	122	0	122	0	122	0	0	21.33	1	121.998	0.00249447	121.995	0.00498894	122	4.08929e-05	4.09518e-05
	21.26	1	124	0	124	0	124	0	0	21.26	1	122.997	0.00251495	122.995	0.00502989	123	4.08934e-05	4.09533e-05
	21.22	1	125	0	125	0	125	0	0	21.26	1	123.997	0.00253542	123.995	0.00507084	124	4.08939e-05	4.09533e-05
	21.21	1	126	0	126	0	126	0	0	21.22	1	124.997	0.0025559	124.995	0.0051118	125	4.08944e-05	4.09548e-05
	21.1	1	127	0	127	0	127	0	0	21.21	1	125.997	0.00257638	125.995	0.00515275	126	4.08949e-05	4.09557e-05
	20.92	1	128	0	128	0	128	0	0	21.1	1	126.997	0.00259686	126.995	0.00519371	127	4.08954e-05	4.09567e-05
	20.9	1	129	0	129	0	129	0	0	20.92	1	127.997	0.00261733	127.995	0.00523467	128	4.08959e-05	4.09577e-05
	20.77	1	130	0	130	0	130	0	0	20.9	1	128.997	0.00263781	128.995	0.00527563	129	4.08963e-05	4.09586e-05
	20.53	1	131	0	131	0	131	0	0	20.77	1	129.997	0.00265829	129.995	0.00531659	130	4.08968e-05	4.09596e-05
	20.48	1	132	0	132	0	132	0	0	20.53	1	130.997	0.00267877	130.995	0.00535755	131	4.08973e-05	4.09606e-05
	20.05	1	133	0	133	0	133	0	0	20.48	1	131.997	0.00269925	131.995	0.00539851	132	4.08978e-05	4.09616e-05
	20.02	1	134	0	134	0	134	0	0	20.05	1	132.997	0.00271974	132.995	0.00543947	133	4.08983e-05	4.09625e-05
	19.9	1	135	0	135	0	135	0	0	20.02	1	133.997	0.00274022	133.995	0.00548044	134	4.08988e-05	4.09635e-05
	19.87	1	136	0	136	0	136	0	0	19.9	1	134.997	0.0027607	134.994	0.0055214	135	4.08993e-05	4.09645e-05
	19.74	1	137	0	137	0	137	0	0	19.87	1	135.997	0.00278118	135.994	0.00556237	136	4.08997e-05	4.09655e-05
	19.36	1	138	0	138	0	138	0	0	19.74	1	136.997	0.00280167	136.994	0.00560333	137	4.09002e-05	4.09664e-05
	19.18	1	139	0	139	0	139	0	0	19.36	1	137.997	0.00282215	137.994	0.0056443	138	4.09007e-05	4.09674e-05
	19.08	1	140	0	140	0	140	0	0	19.18	1	138.997	0.00284263	138.994	0.00568527	139	4.09012e-05	4.09684e-05
	19.07	1	141	0	141	0	141	0	0	19.08	1	139.997	0.00286312	139.994	0.00572624	140	4.09017e-05	4.09694e-05
	18.98	1	142	0	142	0	142	0	0	19.07	1	140.997	0.0028836	140.994	0.00576721	141	4.09022e-05	4.09703e-05
	18.65	1	143	0	143	0	143	0	0	18.98	1	141.997	0.00290409	141.994	0.00580818	142	4.09027e-05	4.09713e-05
	18.3	1	144	0	144	0	144	0	0	18.65	1	142.997	0.00292458	142.994	0.00584915	143	4.09032e-05	4.09723e-05
	18.07	1	145	0	145	0	145	0	0	18.3	1	143.997	0.00294506	143.994	0.00589012	144	4.09036e-05	4.09733e-05
	18.02	1	146	0	146	0	146	0	0	18.07	1	144.997	0.00296555	144.994	0.0059311	145	4.09041e-05	4.09742e-05
	18	1	149	0	149	0	149	0	0	18.02	1	145.997	0.00298604	145.994	0.00597207	146	4.09046e-05	4.09752e-05
	17.71	1	150	0	150	0	150	0	0	18	1	146.997	0.00300652	146.994	0.00601305	147	4.09051e-05	4.09772e-05
	17.61	1	151	0	151	0	151	0	0	18	1	147.997	0.00302701	147.994	0.00605403	148	4.09056e-05	4.09772e-05
	17.51	1	153	0	153	0	153	0	0	18	1	148.997	0.0030475	148.994	0.00609501	149	4.09061e-05	4.09772e-05
	17.41	1	154	0	154	0	154	0	0	17.71	1	149.997	0.00306799	149.994	0.00613598	150	4.09066e-05	4.09791e-05
	17.4	1	155	0	155	0	155	0	0	17.61	1	150.997	0.00308848	150.994	0.00617696	151	4.0907e-05	4.09801e-05
	17.16	1	156	0	156	0	156	0	0	17.51	1	151.997	0.00310897	151.994	0.00621795	152	4.09075e-05	4.09816e-05
	17.15	1	157	0	157	0	157	0	0	17.51	1	152.997	0.00312946	152.994	0.00625893	153	4.0908e-05	4.09816e-05
	17.14	1	158	0	158	0	158	0	0	17.41	1	153.997	0.00314996	153.994	0.00629991	154	4.09085e-05	4.0983e-05
	17.11	1	159	0	159	0	159	0	0	17.4	1	154.997	0.00317045	154.994	0.00634089	155	4.0909e-05	4.0984e-05
	17.06	1	160	0	160	0	160	0	0	17.16	1	155.997	0.00319094	155.994	0.00638188	156	4.09095e-05	4.0985e-05
	17	1	161	0	161	0	161	0	0	17.15	1	156.997	0.00321143	156.994	0.00642287	157	4.091e-05	4.09859e-05
	16.97	1	162	0	162	0	162	0	0	17.14	1	157.997	0.00323193	157.994	0.00646385	158	4.09105e-05	4.09869e-05
	16.52	1	163	0	163	0	163	0	0	17.11	1	158.997	0.00325242	158.993	0.00650484	159	4.09109e-05	4.09879e-05
	16.5	1	164	0	164	0	164	0	0	17.06	1	159.997	0.00327291	159.993	0.00654583	160	4.09114e-05	4.09889e-05
	16.27	1	165	0	165	0	165	0	0	17	1	160.997	0.00329341	160.993	0.00658682	161	4.09119e-05	4.09898e-05
	16.24	1	166	0	166	0	166	0	0	16.97	1	161.997	0.0033139	161.993	0.00662781	162	4.09124e-05	4.09908e-05
	16.09	1	167	0	167	0	167	0	0	16.52	1	162.997	0.0033344	162.993	0.0066688	163	4.09129e-05	4.09918e-05
	16.07	1	168	0	168	0	168	0	0	16.5	1	163.997	0.0033549	163.993	0.00670979	164	4.09134e-05	4.09928e-05
	16.05	1	169	0	169	0	169	0	0	16.27	1	164.997	0.00337539	164.993	0.00675079	165	4.09139e-05	4.09937e-05
	16.02	1	170	0	170	0	170	0	0	16.24	1	165.997	0.00339589	165.993	0.00679178	166	4.09144e-05	4.09947e-05
	16	1	171	0	171	0	171	0	0	16.09	1	166.997	0.00341639	166.993	0.00683278	167	4.09148e-05	4.09957e-05
	15.93	1	172	0	172	0	172	0	0	16.07	1	167.997	0.00343689	167.993	0.00687378	168	4.09153e-05	4.09967e-05
	15.89	1	173	0	173	0	173	0	0	16.05	1	168.997	0.00345739	168.993	0.00691477	169	4.09158e-05	4.09977e-05
	15.82	1	174	0	174	0	174	0	0	16.02	1	169.997	0.00347789	169.993	0.00695577	170	4.09163e-05	4.09986e-05
	15.77	1	175	0	175	0	175	0	0	16	1	170.997	0.00349839	170.993	0.00699677	171	4.09168e-05	4.09996e-05
	15.73	1	176	0	176	0	176	0	0	15.93	1	171.996	0.00351889	171.993	0.00703777	172	4.09173e-05	4.10006e-05
	15.26	1	177	0	177	0	177	0	0	15.89	1	172.996	0.00353939	172.993	0.00707877	173	4.09178e-05	4.10016e-05
	15.21	1	178	0	178	0	178	0	0	15.82	1	173.996	0.00355989	173.993	0.00711978	174	4.09183e-05	4.10025e-05
	14.94	1	179	0	179	0	179	0	0	15.77	1	174.996	0.00358039	174.993	0.00716078	175	4.09187e-05	4.10035e-05
	14.8	1	180	0	180	0	180	0	0	15.73	1	175.996	0.00360089	175.993	0.00720178	176	4.09192e-05	4.10045e-05
	14.79	1	181	0	181	0	181	0	0	15.26	1	176.996	0.00362139	176.993	0.00724279	177	4.09197e-05	4.10055e-05
	14.77	1	182	0	182	0	182	0	0	15.21	1	177.996	0.0036419	177.993	0.0072838	178	4.09202e-05	4.10064e-05
	14.68	1	183	0	183	0	183	0	0	14.94	1	178.996	0.0036624	178.993	0.0073248	179	4.09207e-05	4.10074e-05
	14.59	1	184	0	184	0	184	0	0	14.8	1	179.996	0.00368291	179.993	0.00736581	180	4.09212e-05	4.10084e-05
	14.58	1	185	0	185	0	185	0	0	14.79	1	180.996	0.00370341	180.993	0.00740682	181	4.09217e-05	4.10094e-05
	14.54	1	186	0	186	0	186	0	0	14.77	1	181.996	0.00372392	181.993	0.00744783	182	4.09221e-05	4.10103e-05
	14.43	1	187	0	187	0	187	0	0	14.68	1	182.996	0.00374442	182.993	0.00748884	183	4.09226e-05	4.10113e-05
	14.41	1	188	0	188	0	188	0	0	14.59	1	183.996	0.00376493	183.992	0.00752985	184	4.09231e-05	4.10123e-05
	14.3	1	190	0	190	0	190	0	0	14.58	1	184.996	0.00378543	184.992	0.00757087	185	4.09236e-05	4.10133e-05
	14.24	1	191	0	191	0	191	0	0	14.54	1	185.996	0.00380594	185.992	0.00761188	186	4.09241e-05	4.10142e-05
	14.22	1	192	0	192	0	192	0	0	14.43	1	186.996	0.00382645	186.992	0.0076529	187	4.09246e-05	4.10152e-05
	14.2	1	193	0	193	0	193	0	0	14.41	1	187.996	0.00384696	187.992	0.00769391	188	4.09251e-05	4.10162e-05
	14.18	1	194	0	194	0	194	0	0	14.3	1	188.996	0.00386747	188.992	0.00773493	189	4.09256e-05	4.10177e-05
	14.12	1	195	0	195	0	195	0	0	14.3	1	189.996	0.00388797	189.992	0.00777595	190	4.0926e-05	4.10177e-05
	14.09	1	196	0	196	0	196	0	0	14.24	1	190.996	0.00390848	190.992	0.00781697	191	4.09265e-05	4.10191e-05
	14.04	1	197	0	197	0	197	0	0	14.22	1	191.996	0.00392899	191.992	0.00785799	192	4.0927e-05	4.10201e-05
	14	1	199	0	199	0	199	0	0	14.2	1	192.996	0.0039495	192.992	0.00789901	193	4.09275e-05	4.10211e-05
	13.96	1	200	0	200	0	200	0	0	14.18	1	193.996	0.00397002	193.992	0.00794003	194	4.0928e-05	4.1022e-05
	13.77	1	201	0	201	0	201	0	0	14.12	1	194.996	0.00399053	194.992	0.00798105	195	4.09285e-05	4.1023e-05
	13.73	1	202	0	202	0	202	0	0	14.09	1	195.996	0.00401104	195.992	0.00802208	196	4.0929e-05	4.1024e-05
	13.48	1	203	0	203	0	203	0	0	14.04	1	196.996	0.00403155	196.992	0.0080631	197	4.09295e-05	4.1025e-05
	13.29	1	204	0	204	0	204	0	0	14	1	197.996	0.00405206	197.992	0.00810413	198	4.09299e-05	4.10264e-05
	13.25	1	205	0	205	0	205	0	0	14	1	198.996	0.00407258	198.992	0.00814516	199	4.09304e-05	4.10264e-05
	13.2	1	206	0	206	0	206	0	0	13.96	1	199.996	0.00409309	199.992	0.00818618	200	4.09309e-05	4.10279e-05
	13.14	1	207	0	207	0	207	0	0	13.77	1	200.996	0.00411361	200.992	0.00822721	201	4.09314e-05	4.10289e-05
	13.09	1	208	0	208	0	208	0	0	13.73	1	201.996	0.00413412	201.992	0.00826824	202	4.09319e-05	4.10299e-05
	12.99	1	209	0	209	0	209	0	0	13.48	1	202.996	0.00415464	202.992	0.00830927	203	4.09324e-05	4.10308e-05
	12.87	1	210	0	210	0	210	0	0	13.29	1	203.996	0.00417515	203.992	0.00835031	204	4.09329e-05	4.10318e-05
	12.77	1	212	0	212	0	212	0	0	13.25	1	204.996	0.00419567	204.992	0.00839134	205	4.09334e-05	4.10328e-05
	12.74	1	213	0	213	0	213	0	0	13.2	1	205.996	0.00421619	205.992	0.00843237	206	4.09338e-05	4.10338e-05
	12.71	1	214	0	214	0	214	0	0	13.14	1	206.996	0.0042367	206.992	0.00847341	207	4.09343e-05	4.10347e-05
	12.68	1	215	0	215	0	215	0	0	13.09	1	207.996	0.00425722	207.991	0.00851444	208	4.09348e-05	4.10357e-05
	12.57	1	216	0	216	0	216	0	0	12.99	1	208.996	0.00427774	208.991	0.00855548	209	4.09353e-05	4.10367e-05
	12.55	1	217	0	217	0	217	0	0	12.87	1	209.996	0.00429826	209.991	0.00859652	210	4.09358e-05	4.10377e-05
	12.52	1	218	0	218	0	218	0	0	12.77	1	210.996	0.00431878	210.991	0.00863756	211	4.09363e-05	4.10391e-05
	12.43	1	219	0	219	0	219	0	0	12.77	1	211.996	0.0043393	211.991	0.0086786	212	4.09368e-05	4.10391e-05
	12.27	1	220	0	220	0	220	0	0	12.74	1	212.996	0.00435982	212.991	0.00871964	213	4.09373e-05	4.10406e-05
	12.2	1	221	0	221	0	221	0	0	12.71	1	213.996	0.00438034	213.991	0.00876068	214	4.09377e-05	4.10416e-05
	12.1	1	222	0	222	0	222	0	0	12.68	1	214.996	0.00440086	214.991	0.00880172	215	4.09382e-05	4.10426e-05
	12.09	1	223	0	223	0	223	0	0	12.57	1	215.996	0.00442138	215.991	0.00884276	216	4.09387e-05	4.10435e-05
	12.08	1	224	0	224	0	224	0	0	12.55	1	216.996	0.0044419	216.991	0.00888381	217	4.09392e-05	4.10445e-05
	12.02	1	225	0	225	0	225	0	0	12.52	1	217.996	0.00446243	217.991	0.00892485	218	4.09397e-05	4.10455e-05
	12.01	1	228	0	228	0	228	0	0	12.43	1	218.996	0.00448295	218.991	0.0089659	219	4.09402e-05	4.10465e-05
	12	1	235	0	235	0	235	0	0	12.27	1	219.995	0.00450347	219.991	0.00900695	220	4.09407e-05	4.10474e-05
	11.93	1	236	0	236	0	236	0	0	12.2	1	220.995	0.004524	220.991	0.009048	221	4.09412e-05	4.10484e-05
	11.85	1	237	0	237	0	237	0	0	12.1	1	221.995	0.00454452	221.991	0.00908905	222	4.09416e-05	4.10494e-05
	11.75	1	238	0	238	0	238	0	0	12.09	1	222.995	0.00456505	222.991	0.0091301	223	4.09421e-05	4.10504e-05
	11.6	1	239	0	239	0	239	0	0	12.08	1	223.995	0.00458557	223.991	0.00917115	224	4.09426e-05	4.10513e-05
	11.56	1	240	0	240	0	240	0	0	12.02	1	224.995	0.0046061	224.991	0.0092122	225	4.09431e-05	4.10523e-05
	11.47	1	241	0	241	0	241	0	0	12.01	1	225.995	0.00462663	225.991	0.00925325	226	4.09436e-05	4.10543e-05
	11.36	1	242	0	242	0	242	0	0	12.01	1	226.995	0.00464715	226.991	0.00929431	227	4.09441e-05	4.10543e-05
	11.29	1	243	0	243	0	243	0	0	12.01	1	227.995	0.00466768	227.991	0.00933536	228	4.09446e-05	4.10543e-05
	11.22	1	244	0	244	0	244	0	0	12	1	228.995	0.00468821	228.991	0.00937642	229	4.09451e-05	4.10592e-05
	11.16	1	245	0	245	0	245	0	0	12	1	229.995	0.00470874	229.991	0.00941748	230	4.09455e-05	4.10592e-05
	11.14	1	246	0	246	0	246	0	0	12	1	230.995	0.00472927	230.991	0.00945853	231	4.0946e-05	4.10592e-05
	11.12	1	247	0	247	0	247	0	0	12	1	231.995	0.0047498	231.991	0.00949959	232	4.09465e-05	4.10592e-05
	11.05	1	248	0	248	0	248	0	0	12	1	232.995	0.00477033	232.99	0.00954065	233	4.0947e-05	4.10592e-05
	11.03	1	249	0	249	0	249	0	0	12	1	233.995	0.00479086	233.99	0.00958171	234	4.09475e-05	4.10592e-05
	11	1	250	0	250	0	250	0	0	12	1	234.995	0.00481139	234.99	0.00962278	235	4.0948e-05	4.10592e-05
	10.89	1	251	0	251	0	251	0	0	11.93	1	235.995	0.00483192	235.99	0.00966384	236	4.09485e-05	4.10631e-05
	10.88	1	252	0	252	0	252	0	0	11.85	1	236.995	0.00485245	236.99	0.0097049	237	4.0949e-05	4.1064e-05
	10.8	1	253	0	253	0	253	0	0	11.75	1	237.995	0.00487298	237.99	0.00974597	238	4.09494e-05	4.1065e-05
	10.79	1	254	0	254	0	254	0	0	11.6	1	238.995	0.00489352	238.99	0.00978703	239	4.09499e-05	4.1066e-05
	10.68	1	255	0	255	0	255	0	0	11.56	1	239.995	0.00491405	239.99	0.0098281	240	4.09504e-05	4.1067e-05
	10.56	1	256	0	256	0	256	0	0	11.47	1	240.995	0.00493458	240.99	0.00986917	241	4.09509e-05	4.1068e-05
	10.54	1	257	0	257	0	257	0	0	11.36	1	241.995	0.00495512	241.99	0.00991024	242	4.09514e-05	4.10689e-05
	10.53	1	259	0	259	0	259	0	0	11.29	1	242.995	0.00497565	242.99	0.00995131	243	4.09519e-05	4.10699e-05
	10.52	1	260	0	260	0	260	0	0	11.22	1	243.995	0.00499619	243.99	0.00999238	244	4.09524e-05	4.10709e-05
	10.5	1	261	0	261	0	261	0	0	11.16	1	244.995	0.00501673	244.99	0.0100335	245	4.09529e-05	4.10719e-05
	10.47	1	262	0	262	0	262	0	0	11.14	1	245.995	0.00503726	245.99	0.0100745	246	4.09533e-05	4.10728e-05
	10.37	1	264	0	264	0	264	0	0	11.12	1	246.995	0.0050578	246.99	0.0101156	247	4.09538e-05	4.10738e-05
	10.35	1	265	0	265	0	265	0	0	11.05	1	247.995	0.00507834	247.99	0.0101567	248	4.09543e-05	4.10748e-05
	10.28	1	266	0	266	0	266	0	0	11.03	1	248.995	0.00509887	248.99	0.0101977	249	4.09548e-05	4.10758e-05
	10.16	1	267	0	267	0	267	0	0	11	1	249.995	0.00511941	249.99	0.0102388	250	4.09553e-05	4.10768e-05
	10.15	1	268	0	268	0	268	0	0	10.89	1	250.995	0.00513995	250.99	0.0102799	251	4.09558e-05	4.10777e-05
	10.14	1	269	0	269	0	269	0	0	10.88	1	251.995	0.00516049	251.99	0.010321	252	4.09563e-05	4.10787e-05
	10.13	1	270	0	270	0	270	0	0	10.8	1	252.995	0.00518103	252.99	0.0103621	253	4.09568e-05	4.10797e-05
	10.1	1	271	0	271	0	271	0	0	10.79	1	253.995	0.00520157	253.99	0.0104031	254	4.09573e-05	4.10807e-05
	10.08	1	272	0	272	0	272	0	0	10.68	1	254.995	0.00522211	254.99	0.0104442	255	4.09577e-05	4.10816e-05
	10.04	1	273	0	273	0	273	0	0	10.56	1	255.995	0.00524265	255.99	0.0104853	256	4.09582e-05	4.10826e-05
	10.02	1	274	0	274	0	274	0	0	10.54	1	256.995	0.00526319	256.989	0.0105264	257	4.09587e-05	4.10836e-05
	10.01	1	275	0	275	0	275	0	0	10.53	1	257.995	0.00528374	257.989	0.0105675	258	4.09592e-05	4.10851e-05
	10	1	283	0	283	0	283	0	0	10.53	1	258.995	0.00530428	258.989	0.0106086	259	4.09597e-05	4.10851e-05
	9.96	1	284	0	284	0	284	0	0	10.52	1	259.995	0.00532482	259.989	0.0106496	260	4.09602e-05	4.10865e-05
	9.91	1	285	0	285	0	285	0	0	10.5	1	260.995	0.00534537	260.989	0.0106907	261	4.09607e-05	4.10875e-05
	9.89	1	287	0	287	0	287	0	0	10.47	1	261.995	0.00536591	261.989	0.0107318	262	4.09612e-05	4.10885e-05
	9.86	1	288	0	288	0	288	0	0	10.37	1	262.995	0.00538646	262.989	0.0107729	263	4.09616e-05	4.109e-05
	9.81	1	289	0	289	0	289	0	0	10.37	1	263.995	0.005407	263.989	0.010814	264	4.09621e-05	4.109e-05
	9.43	1	290	0	290	0	290	0	0	10.35	1	264.995	0.00542755	264.989	0.0108551	265	4.09626e-05	4.10914e-05
	9.34	1	291	0	291	0	291	0	0	10.28	1	265.995	0.00544809	265.989	0.0108962	266	4.09631e-05	4.10924e-05
	9.32	1	292	0	292	0	292	0	0	10.16	1	266.995	0.00546864	266.989	0.0109373	267	4.09636e-05	4.10934e-05
	9.31	1	293	0	293	0	293	0	0	10.15	1	267.995	0.00548919	267.989	0.0109784	268	4.09641e-05	4.10944e-05
	9.3	1	294	0	294	0	294	0	0	10.14	1	268.994	0.00550973	268.989	0.0110195	269	4.09646e-05	4.10953e-05
	9.24	1	295	0	295	0	295	0	0	10.13	1	269.994	0.00553028	269.989	0.0110606	270	4.09651e-05	4.10963e-05
	9.19	1	296	0	296	0	296	0	0	10.1	1	270.994	0.00555083	270.989	0.0111017	271	4.09655e-05	4.10973e-05
	9.17	1	298	0	298	0	298	0	0	10.08	1	271.994	0.00557138	271.989	0.0111428	272	4.0966e-05	4.10983e-05
	9.15	1	299	0	299	0	299	0	0	10.04	1	272.994	0.00559193	272.989	0.0111839	273	4.09665e-05	4.10993e-05
	9.11	1	300	0	300	0	300	0	0	10.02	1	273.994	0.00561248	273.989	0.011225	274	4.0967e-05	4.11002e-05
	9.1	1	301	0	301	0	301	0	0	10.01	1	274.994	0.00563303	274.989	0.0112661	275	4.09675e-05	4.11012e-05
	9.07	1	302	0	302	0	302	0	0	10	1	275.994	0.00565358	275.989	0.0113072	276	4.0968e-05	4.11056e-05
	9.03	1	303	0	303	0	303	0	0	10	1	276.994	0.00567413	276.989	0.0113483	277	4.09685e-05	4.11056e-05
	9.02	1	304	0	304	0	304	0	0	10	1	277.994	0.00569469	277.989	0.0113894	278	4.0969e-05	4.11056e-05
	8.96	1	306	0	306	0	306	0	0	10	1	278.994	0.00571524	278.989	0.0114305	279	4.09694e-05	4.11056e-05
	8.92	1	307	0	307	0	307	0	0	10	1	279.994	0.00573579	279.989	0.0114716	280	4.09699e-05	4.11056e-05
	8.82	1	308	0	308	0	308	0	0	10	1	280.994	0.00575634	280.988	0.0115127	281	4.09704e-05	4.11056e-05
	8.76	1	309	0	309	0	309	0	0	10	1	281.994	0.0057769	281.988	0.0115538	282	4.09709e-05	4.11056e-05
	8.73	1	310	0	310	0	310	0	0	10	1	282.994	0.00579745	282.988	0.0115949	283	4.09714e-05	4.11056e-05
	8.71	1	311	0	311	0	311	0	0	9.96	1	283.994	0.00581801	283.988	0.011636	284	4.09719e-05	4.111e-05
	8.62	1	312	0	312	0	312	0	0	9.91	1	284.994	0.00583856	284.988	0.0116771	285	4.09724e-05	4.1111e-05
	8.54	1	313	0	313	0	313	0	0	9.89	1	285.994	0.00585912	285.988	0.0117182	286	4.09729e-05	4.11125e-05
	8.52	1	314	0	314	0	314	0	0	9.89	1	286.994	0.00587968	286.988	0.0117594	287	4.09734e-05	4.11125e-05
	8.49	1	316	0	316	0	316	0	0	9.86	1	287.994	0.00590023	287.988	0.0118005	288	4.09738e-05	4.11139e-05
	8.35	1	317	0	317	0	317	0	0	9.81	1	288.994	0.00592079	288.988	0.0118416	289	4.09743e-05	4.11149e-05
	8.25	1	318	0	318	0	318	0	0	9.43	1	289.994	0.00594135	289.988	0.0118827	290	4.09748e-05	4.11159e-05
	8.24	1	319	0	319	0	319	0	0	9.34	1	290.994	0.00596191	290.988	0.0119238	291	4.09753e-05	4.11169e-05
	8.22	1	321	0	321	0	321	0	0	9.32	1	291.994	0.00598247	291.988	0.0119649	292	4.09758e-05	4.11179e-05
	8.2	1	322	0	322	0	322	0	0	9.31	1	292.994	0.00600303	292.988	0.0120061	293	4.09763e-05	4.11188e-05
	8.17	1	323	0	323	0	323	0	0	9.3	1	293.994	0.00602359	293.988	0.0120472	294	4.09768e-05	4.11198e-05
	8.13	1	324	0	324	0	324	0	0	9.24	1	294.994	0.00604415	294.988	0.0120883	295	4.09773e-05	4.11208e-05
	8.12	1	325	0	325	0	325	0	0	9.19	1	295.994	0.00606471	295.988	0.0121294	296	4.09777e-05	4.11218e-05
	8.11	1	326	0	326	0	326	0	0	9.17	1	296.994	0.00608527	296.988	0.0121705	297	4.09782e-05	4.11233e-05
	8.1	1	327	0	327	0	327	0	0	9.17	1	297.994	0.00610583	297.988	0.0122117	298	4.09787e-05	4.11233e-05
	8.09	1	328	0	328	0	328	0	0	9.15	1	298.994	0.00612639	298.988	0.0122528	299	4.09792e-05	4.11247e-05
	8.06	1	329	0	329	0	329	0	0	9.11	1	299.994	0.00614696	299.988	0.0122939	300	4.09797e-05	4.11257e-05
	8.03	1	330	0	330	0	330	0	0	9.1	1	300.994	0.00616752	300.988	0.012335	301	4.09802e-05	4.11267e-05
	8.02	1	332	0	332	0	332	0	0	9.07	1	301.994	0.00618808	301.988	0.0123762	302	4.09807e-05	4.11277e-05
	8.01	1	333	0	333	0	333	0	0	9.03	1	302.994	0.00620865	302.988	0.0124173	303	4.09812e-05	4.11286e-05
	8	1	348	0	348	0	348	0	0	9.02	1	303.994	0.00622921	303.988	0.0124584	304	4.09817e-05	4.11296e-05
	7.95	1	349	0	349	0	349	0	0	8.96	1	304.994	0.00624978	304.988	0.0124996	305	4.09821e-05	4.11311e-05
	7.89	1	351	0	351	0	351	0	0	8.96	1	305.994	0.00627034	305.987	0.0125407	306	4.09826e-05	4.11311e-05
	7.85	1	352	0	352	0	352	0	0	8.92	1	306.994	0.00629091	306.987	0.0125818	307	4.09831e-05	4.11326e-05
	7.82	1	353	0	353	0	353	0	0	8.82	1	307.994	0.00631148	307.987	0.012623	308	4.09836e-05	4.11335e-05
	7.8	1	354	0	354	0	354	0	0	8.76	1	308.994	0.00633204	308.987	0.0126641	309	4.09841e-05	4.11345e-05
	7.72	1	355	0	355	0	355	0	0	8.73	1	309.994	0.00635261	309.987	0.0127052	310	4.09846e-05	4.11355e-05
	7.71	1	356	0	356	0	356	0	0	8.71	1	310.994	0.00637318	310.987	0.0127464	311	4.09851e-05	4.11365e-05
	7.68	1	357	0	357	0	357	0	0	8.62	1	311.994	0.00639375	311.987	0.0127875	312	4.09856e-05	4.11375e-05
	7.57	1	358	0	358	0	358	0	0	8.54	1	312.994	0.00641432	312.987	0.0128286	313	4.09861e-05	4.11384e-05
	7.54	1	359	0	359	0	359	0	0	8.52	1	313.994	0.00643489	313.987	0.0128698	314	4.09865e-05	4.11394e-05
	7.52	1	360	0	360	0	360	0	0	8.49	1	314.994	0.00645546	314.987	0.0129109	315	4.0987e-05	4.11409e-05
	7.5	1	361	0	361	0	361	0	0	8.49	1	315.994	0.00647603	315.987	0.0129521	316	4.09875e-05	4.11409e-05
	7.41	1	362	0	362	0	362	0	0	8.35	1	316.994	0.0064966	316.987	0.0129932	317	4.0988e-05	4.11424e-05
	7.34	1	363	0	363	0	363	0	0	8.25	1	317.993	0.00651717	317.987	0.0130343	318	4.09885e-05	4.11434e-05
	7.33	1	364	0	364	0	364	0	0	8.24	1	318.993	0.00653774	318.987	0.0130755	319	4.0989e-05	4.11443e-05
	7.32	1	365	0	365	0	365	0	0	8.22	1	319.993	0.00655832	319.987	0.0131166	320	4.09895e-05	4.11458e-05
	7.29	1	366	0	366	0	366	0	0	8.22	1	320.993	0.00657889	320.987	0.0131578	321	4.099e-05	4.11458e-05
	7.23	1	367	0	367	0	367	0	0	8.2	1	321.993	0.00659946	321.987	0.0131989	322	4.09904e-05	4.11473e-05
	7.19	1	368	0	368	0	368	0	0	8.17	1	322.993	0.00662004	322.987	0.0132401	323	4.09909e-05	4.11483e-05
	7.17	1	369	0	369	0	369	0	0	8.13	1	323.993	0.00664061	323.987	0.0132812	324	4.09914e-05	4.11492e-05
	7.06	1	370	0	370	0	370	0	0	8.12	1	324.993	0.00666119	324.987	0.0133224	325	4.09919e-05	4.11502e-05
	7.05	1	371	0	371	0	371	0	0	8.11	1	325.993	0.00668176	325.987	0.0133635	326	4.09924e-05	4.11512e-05
	7.04	1	372	0	372	0	372	0	0	8.1	1	326.993	0.00670234	326.987	0.0134047	327	4.09929e-05	4.11522e-05
	7.02	1	373	0	373	0	373	0	0	8.09	1	327.993	0.00672291	327.987	0.0134458	328	4.09934e-05	4.11532e-05
	7	1	374	0	374	0	374	0	0	8.06	1	328.993	0.00674349	328.987	0.013487	329	4.09939e-05	4.11542e-05
	6.95	1	375	0	375	0	375	0	0	8.03	1	329.993	0.00676407	329.986	0.0135281	330	4.09944e-05	4.11551e-05
	6.88	1	376	0	376	0	376	0	0	8.02	1	330.993	0.00678465	330.986	0.0135693	331	4.09948e-05	4.11566e-05
	6.78	1	378	0	378	0	378	0	0	8.02	1	331.993	0.00680523	331.986	0.0136105	332	4.09953e-05	4.11566e-05
	6.74	1	379	0	379	0	379	0	0	8.01	1	332.993	0.0068258	332.986	0.0136516	333	4.09958e-05	4.11581e-05
	6.72	1	380	0	380	0	380	0	0	8	1	333.993	0.00684638	333.986	0.0136928	334	4.09963e-05	4.11659e-05
	6.68	1	382	0	382	0	382	0	0	8	1	334.993	0.00686696	334.986	0.0137339	335	4.09968e-05	4.11659e-05
	6.67	1	383	0	383	0	383	0	0	8	1	335.993	0.00688754	335.986	0.0137751	336	4.09973e-05	4.11659e-05
	6.66	1	384	0	384	0	384	0	0	8	1	336.993	0.00690813	336.986	0.0138163	337	4.09978e-05	4.11659e-05
	6.64	1	385	0	385	0	385	0	0	8	1	337.993	0.00692871	337.986	0.0138574	338	4.09983e-05	4.11659e-05
	6.62	1	386	0	386	0	386	0	0	8	1	338.993	0.00694929	338.986	0.0138986	339	4.09988e-05	4.11659e-05
	6.59	1	387	0	387	0	387	0	0	8	1	339.993	0.00696987	339.986	0.0139397	340	4.09992e-05	4.11659e-05
	6.54	1	389	0	389	0	389	0	0	8	1	340.993	0.00699045	340.986	0.0139809	341	4.09997e-05	4.11659e-05
	6.52	1	392	0	392	0	392	0	0	8	1	341.993	0.00701104	341.986	0.0140221	342	4.10002e-05	4.11659e-05
	6.5	1	393	0	393	0	393	0	0	8	1	342.993	0.00703162	342.986	0.0140632	343	4.10007e-05	4.11659e-05
	6.47	1	394	0	394	0	394	0	0	8	1	343.993	0.00705221	343.986	0.0141044	344	4.10012e-05	4.11659e-05
	6.46	1	395	0	395	0	395	0	0	8	1	344.993	0.00707279	344.986	0.0141456	345	4.10017e-05	4.11659e-05
	6.45	1	397	0	397	0	397	0	0	8	1	345.993	0.00709338	345.986	0.0141868	346	4.10022e-05	4.11659e-05
	6.41	1	398	0	398	0	398	0	0	8	1	346.993	0.00711396	346.986	0.0142279	347	4.10027e-05	4.11659e-05
	6.4	1	399	0	399	0	399	0	0	8	1	347.993	0.00713455	347.986	0.0142691	348	4.10032e-05	4.11659e-05
	6.39	1	400	0	400	0	400	0	0	7.95	1	348.993	0.00715514	348.986	0.0143103	349	4.10036e-05	4.11738e-05
	6.36	1	401	0	401	0	401	0	0	7.89	1	349.993	0.00717572	349.986	0.0143514	350	4.10041e-05	4.11753e-05
	6.34	1	402	0	402	0	402	0	0	7.89	1	350.993	0.00719631	350.986	0.0143926	351	4.10046e-05	4.11753e-05
	6.33	1	403	0	403	0	403	0	0	7.85	1	351.993	0.0072169	351.986	0.0144338	352	4.10051e-05	4.11768e-05
	6.32	1	404	0	404	0	404	0	0	7.82	1	352.993	0.00723749	352.986	0.014475	353	4.10056e-05	4.11778e-05
	6.28	0.999999	405	0	405	0	405	0	0	7.8	1	353.993	0.00725808	353.985	0.0145162	354	4.10061e-05	4.11787e-05
	6.25	0.999999	406	0	406	0	406	0	0	7.72	1	354.993	0.00727867	354.985	0.0145573	355	4.10066e-05	4.11797e-05
	6.21	0.999999	407	0	407	0	407	0	0	7.71	1	355.993	0.00729926	355.985	0.0145985	356	4.10071e-05	4.11807e-05
	6.18	0.999999	408	0	408	0	408	0	0	7.68	1	356.993	0.00731985	356.985	0.0146397	357	4.10076e-05	4.11817e-05
	6.16	0.999999	409	0	409	0	409	0	0	7.57	1	357.993	0.00734044	357.985	0.0146809	358	4.1008e-05	4.11827e-05
	6.12	0.999999	410	0	410	0	410	0	0	7.54	1	358.993	0.00736103	358.985	0.0147221	359	4.10085e-05	4.11837e-05
	6.11	0.999999	411	0	411	0	411	0	0	7.52	1	359.993	0.00738162	359.985	0.0147632	360	4.1009e-05	4.11847e-05
	6.1	0.999999	412	0	412	0	412	0	0	7.5	1	360.993	0.00740222	360.985	0.0148044	361	4.10095e-05	4.11856e-05
	6.09	0.999999	413	0	413	0	413	0	0	7.41	1	361.993	0.00742281	361.985	0.0148456	362	4.101e-05	4.11866e-05
	6.07	0.999999	414	0	414	0	414	0	0	7.34	1	362.993	0.0074434	362.985	0.0148868	363	4.10105e-05	4.11876e-05
	6.06	0.999999	415	0	415	0	415	0	0	7.33	1	363.993	0.007464	363.985	0.014928	364	4.1011e-05	4.11886e-05
	6.03	0.999999	416	0	416	0	416	0	0	7.32	1	364.993	0.00748459	364.985	0.0149692	365	4.10115e-05	4.11896e-05
	6.01	0.999999	418	0	418	0	418	0	0	7.29	1	365.992	0.00750519	365.985	0.0150104	366	4.1012e-05	4.11906e-05
	6	0.999999	448	0	448	0	448	0	0	7.23	1	366.992	0.00752578	366.985	0.0150516	367	4.10124e-05	4.11916e-05
	5.86	0.999999	449	0	449	0	449	0	0	7.19	1	367.992	0.00754638	367.985	0.0150928	368	4.10129e-05	4.11925e-05
	5.82	0.999998	450	0	450	0	450	0	0	7.17	1	368.992	0.00756698	368.985	0.015134	369	4.10134e-05	4.11935e-05
	5.79	0.999998	452	0	452	0	452	0	0	7.06	1	369.992	0.00758757	369.985	0.0151751	370	4.10139e-05	4.11945e-05
	5.78	0.999998	453	0	453	0	453	0	0	7.05	1	370.992	0.00760817	370.985	0.0152163	371	4.10144e-05	4.11955e-05
	5.77	0.999998	454	0	454	0	454	0	0	7.04	1	371.992	0.00762877	371.985	0.0152575	372	4.10149e-05	4.11965e-05
	5.75	0.999998	455	0	455	0	455	0	0	7.02	1	372.992	0.00764937	372.985	0.0152987	373	4.10154e-05	4.11975e-05
	5.73	0.999998	456	0	456	0	456	0	0	7	1	373.992	0.00766997	373.985	0.0153399	374	4.10159e-05	4.11985e-05
	5.72	0.999998	458	0	458	0	458	0	0	6.95	1	374.992	0.00769057	374.985	0.0153811	375	4.10164e-05	4.11995e-05
	5.7	0.999998	459	0	459	0	459	0	0	6.88	1	375.992	0.00771117	375.985	0.0154223	376	4.10169e-05	4.12005e-05
	5.68	0.999998	460	0	460	0	460	0	0	6.78	1	376.992	0.00773177	376.985	0.0154635	377	4.10173e-05	4.12019e-05
	5.67	0.999998	461	0	461	0	461	0	0	6.78	1	377.992	0.00775237	377.984	0.0155047	378	4.10178e-05	4.12019e-05
	5.66	0.999998	462	0	462	0	462	0	0	6.74	1	378.992	0.00777297	378.984	0.0155459	379	4.10183e-05	4.12034e-05
	5.65	0.999998	464	0	464	0	464	0	0	6.72	1	379.992	0.00779357	379.984	0.0155871	380	4.10188e-05	4.12044e-05
	5.62	0.999998	465	0	465	0	465	0	0	6.68	1	380.992	0.00781418	380.984	0.0156284	381	4.10193e-05	4.12059e-05
	5.6	0.999997	466	0	466	0	466	0	0	6.68	1	381.992	0.00783478	381.984	0.0156696	382	4.10198e-05	4.12059e-05
	5.59	0.999997	467	0	467	0	467	0	0	6.67	1	382.992	0.00785538	382.984	0.0157108	383	4.10203e-05	4.12074e-05
	5.58	0.999997	469	0	469	0	469	0	0	6.66	1	383.992	0.00787599	383.984	0.015752	384	4.10208e-05	4.12084e-05
	5.57	0.999997	470	0	470	0	470	0	0	6.64	1	384.992	0.00789659	384.984	0.0157932	385	4.10213e-05	4.12094e-05
	5.56	0.999997	471	0	471	0	471	0	0	6.62	1	385.992	0.0079172	385.984	0.0158344	386	4.10218e-05	4.12104e-05
	5.55	0.999997	473	0	473	0	473	0	0	6.59	1	386.992	0.0079378	386.984	0.0158756	387	4.10222e-05	4.12113e-05
	5.46	0.999997	474	0	474	0	474	0	0	6.54	1	387.992	0.00795841	387.984	0.0159168	388	4.10227e-05	4.12128e-05
	5.44	0.999996	476	0	476	0	476	0	0	6.54	1	388.992	0.00797902	388.984	0.015958	389	4.10232e-05	4.12128e-05
	5.42	0.999996	477	0	477	0	477	0	0	6.52	1	389.992	0.00799962	389.984	0.0159992	390	4.10237e-05	4.12153e-05
	5.38	0.999996	478	0	478	0	478	0	0	6.52	1	390.992	0.00802023	390.984	0.0160405	391	4.10242e-05	4.12153e-05
	5.32	0.999995	479	0	479	0	479	0	0	6.52	1	391.992	0.00804084	391.984	0.0160817	392	4.10247e-05	4.12153e-05
	5.29	0.999995	480	0	480	0	480	0	0	6.5	1	392.992	0.00806145	392.984	0.0161229	393	4.10252e-05	4.12173e-05
	5.28	0.999995	482	0	482	0	482	0	0	6.47	1	393.992	0.00808206	393.984	0.0161641	394	4.10257e-05	4.12183e-05
	5.26	0.999995	483	0	483	0	483	0	0	6.46	1	394.992	0.00810267	394.984	0.0162053	395	4.10262e-05	4.12193e-05
	5.22	0.999994	485	0	485	0	485	0	0	6.45	1	395.992	0.00812328	395.984	0.0162466	396	4.10267e-05	4.12208e-05
	5.14	0.999993	486	0	486	0	486	0	0	6.45	1	396.992	0.00814389	396.984	0.0162878	397	4.10271e-05	4.12208e-05
	5.06	0.999991	487	0	487	0	487	0	0	6.41	1	397.992	0.0081645	397.984	0.016329	398	4.10276e-05	4.12223e-05
	5.04	0.999991	488	0	488	0	488	0	0	6.4	1	398.992	0.00818511	398.984	0.0163702	399	4.10281e-05	4.12233e-05
	5	0.99999	490	0	490	0	490	0	0	6.39	1	399.992	0.00820572	399.984	0.0164114	400	4.10286e-05	4.12243e-05
	4.99	0.99999	491	0	491	0	491	0	0	6.36	1	400.992	0.00822634	400.984	0.0164527	401	4.10291e-05	4.12252e-05
	4.96	0.999989	492	0	492	0	492	0	0	6.34	1	401.992	0.00824695	401.984	0.0164939	402	4.10296e-05	4.12262e-05
	4.91	0.999988	493	0	493	0	493	0	0	6.33	1	402.992	0.00826756	402.983	0.0165351	403	4.10301e-05	4.12272e-05
	4.83	0.999985	494	0	494	0	494	0	0	6.32	1	403.992	0.00828818	403.983	0.0165764	404	4.10306e-05	4.12282e-05
	4.8	0.999984	495	0	495	0	495	0	0	6.28	0.999999	404.992	0.00830879	404.983	0.0166176	405	4.10311e-05	4.12292e-05
	4.77	0.999983	497	0	497	0	497	0	0	6.25	0.999999	405.992	0.00832941	405.983	0.0166588	406	4.10316e-05	4.12302e-05
	4.75	0.999982	498	0	498	0	498	0	0	6.21	0.999999	406.992	0.00835002	406.983	0.0167	407	4.1032e-05	4.12312e-05
	4.74	0.999982	499	0	499	0	499	0	0	6.18	0.999999	407.992	0.00837064	407.983	0.0167413	408	4.10325e-05	4.12322e-05
	4.73	0.999981	500	0	500	0	500	0	0	6.16	0.999999	408.992	0.00839125	408.983	0.0167825	409	4.1033e-05	4.12332e-05
	4.72	0.999981	501	0	501	0	501	0	0	6.12	0.999999	409.992	0.00841187	409.983	0.0168237	410	4.10335e-05	4.12342e-05
	4.67	0.999979	502	0	502	0	502	0	0	6.11	0.999999	410.992	0.00843249	410.983	0.016865	411	4.1034e-05	4.12352e-05
	4.65	0.999978	503	0	503	0	503	0	0	6.1	0.999999	411.992	0.00845311	411.983	0.0169062	412	4.10345e-05	4.12362e-05
	4.64	0.999977	504	0	504	0	504	0	0	6.09	0.999999	412.992	0.00847373	412.983	0.0169475	413	4.1035e-05	4.12372e-05
	4.62	0.999976	506	0	506	0	506	0	0	6.07	0.999999	413.992	0.00849434	413.983	0.0169887	414	4.10355e-05	4.12382e-05
	4.61	0.999975	508	0	508	0	508	0	0	6.06	0.999999	414.991	0.00851496	414.983	0.0170299	415	4.1036e-05	4.12392e-05
	4.59	0.999974	509	0	509	0	509	0	0	6.03	0.999999	415.991	0.00853558	415.983	0.0170712	416	4.10365e-05	4.12402e-05
	4.58	0.999974	510	0	510	0	510	0	0	6.01	0.999999	416.991	0.00855621	416.983	0.0171124	417	4.1037e-05	4.12417e-05
	4.57	0.999973	512	0	512	0	512	0	0	6.01	0.999999	417.991	0.00857683	417.983	0.0171537	418	4.10374e-05	4.12417e-05
	4.56	0.999972	513	0	513	0	513	0	0	6	0.999999	418.991	0.00859745	418.983	0.0171949	419	4.10379e-05	4.12578e-05
	4.55	0.999972	514	0	514	0	514	0	0	6	0.999999	419.991	0.00861807	419.983	0.0172361	420	4.10384e-05	4.12578e-05
	4.54	0.999971	515	0	515	0	515	0	0	6	0.999999	420.991	0.00863869	420.983	0.0172774	421	4.10389e-05	4.12578e-05
	4.53	0.99997	516	0	516	0	516	0	0	6	0.999999	421.991	0.00865932	421.983	0.0173186	422	4.10394e-05	4.12578e-05
	4.52	0.99997	517	0	517	0	517	0	0	6	0.999999	422.991	0.00867994	422.983	0.0173599	423	4.10399e-05	4.12578e-05
	4.46	0.999965	518	0	518	0	518	0	0	6	0.999999	423.991	0.00870056	423.983	0.0174011	424	4.10404e-05	4.12578e-05
	4.42	0.999962	519	0	519	0	519	0	0	6	0.999999	424.991	0.00872119	424.983	0.0174424	425	4.10409e-05	4.12578e-05
	4.41	0.999961	521	0	521	0	521	0	0	6	0.999999	425.991	0.00874181	425.983	0.0174836	426	4.10414e-05	4.12578e-05
	4.38	0.999958	523	0	523	0	523	0	0	6	0.999999	426.991	0.00876244	426.982	0.0175249	427	4.10419e-05	4.12578e-05
	4.35	0.999955	524	0	524	0	524	0	0	6	0.999999	427.991	0.00878307	427.982	0.0175661	428	4.10424e-05	4.12578e-05
	4.3	0.99995	526	0	526	0	526	0	0	6	0.999999	428.991	0.00880369	428.982	0.0176074	429	4.10429e-05	4.12578e-05
	4.29	0.999949	528	0	528	0	528	0	0	6	0.999999	429.991	0.00882432	429.982	0.0176486	430	4.10433e-05	4.12578e-05
	4.28	0.999948	529	0	529	0	529	0	0	6	0.999999	430.991	0.00884495	430.982	0.0176899	431	4.10438e-05	4.12578e-05
	4.26	0.999945	530	0	530	0	530	0	0	6	0.999999	431.991	0.00886557	431.982	0.0177311	432	4.10443e-05	4.12578e-05
	4.25	0.999944	531	0	531	0	531	0	0	6	0.999999	432.991	0.0088862	432.982	0.0177724	433	4.10448e-05	4.12578e-05
	4.24	0.999942	532	0	532	0	532	0	0	6	0.999999	433.991	0.00890683	433.982	0.0178137	434	4.10453e-05	4.12578e-05
	4.23	0.999941	534	0	534	0	534	0	0	6	0.999999	434.991	0.00892746	434.982	0.0178549	435	4.10458e-05	4.12578e-05
	4.22	0.99994	535	0	535	0	535	0	0	6	0.999999	435.991	0.00894809	435.982	0.0178962	436	4.10463e-05	4.12578e-05
	4.21	0.999938	536	0	536	0	536	0	0	6	0.999999	436.991	0.00896872	436.982	0.0179374	437	4.10468e-05	4.12578e-05
	4.2	0.999937	537	0	537	0	537	0	0	6	0.999999	437.991	0.00898935	437.982	0.0179787	438	4.10473e-05	4.12578e-05
	4.19	0.999935	538	0	538	0	538	0	0	6	0.999999	438.991	0.00900999	438.982	0.01802	439	4.10478e-05	4.12578e-05
	4.18	0.999934	539	0	539	0	539	0	0	6	0.999999	439.991	0.00903062	439.982	0.0180612	440	4.10483e-05	4.12578e-05
	4.16	0.999931	540	0	540	0	540	0	0	6	0.999999	440.991	0.00905125	440.982	0.0181025	441	4.10488e-05	4.12578e-05
	4.14	0.999928	542	0	542	0	542	0	0	6	0.999999	441.991	0.00907188	441.982	0.0181438	442	4.10492e-05	4.12578e-05
	4.13	0.999926	544	0	544	0	544	0	0	6	0.999999	442.991	0.00909252	442.982	0.018185	443	4.10497e-05	4.12578e-05
	4.12	0.999924	546	0	546	0	546	0	0	6	0.999999	443.991	0.00911315	443.982	0.0182263	444	4.10502e-05	4.12578e-05
	4.08	0.999917	547	0	547	0	547	0	0	6	0.999999	444.991	0.00913379	444.982	0.0182676	445	4.10507e-05	4.12578e-05
	4.07	0.999915	549	0	549	0	549	0	0	6	0.999999	445.991	0.00915442	445.982	0.0183088	446	4.10512e-05	4.12578e-05
	4.05	0.999911	552	0	552	0	552	0	0	6	0.999999	446.991	0.00917506	446.982	0.0183501	447	4.10517e-05	4.12578e-05
	4.04	0.999909	554	0	554	0	554	0	0	6	0.999999	447.991	0.00919569	447.982	0.0183914	448	4.10522e-05	4.12578e-05
	4.03	0.999907	555	0	555	0	555	0	0	5.86	0.999999	448.991	0.00921633	448.982	0.0184327	449	4.10527e-05	4.12736e-05
	4.02	0.999905	558	0	558	0	558	0	0	5.82	0.999998	449.991	0.00923697	449.982	0.0184739	450	4.10532e-05	4.12746e-05
	4.01	0.999902	565	0	565	0	565	0	0	5.79	0.999998	450.991	0.00925761	450.981	0.0185152	451	4.10537e-05	4.12761e-05
	4	0.9999	650	0	650	0	650	0	0	5.79	0.999998	451.991	0.00927824	451.981	0.0185565	452	4.10542e-05	4.12761e-05
	3.96	0.99989	653	0	653	0	653	0	0	5.78	0.999998	452.991	0.00929888	452.981	0.0185978	453	4.10547e-05	4.12777e-05
	3.9	0.999874	654	0	654	0	654	0	0	5.77	0.999998	453.991	0.00931952	453.981	0.018639	454	4.10552e-05	4.12787e-05
	3.88	0.999868	655	0	655	0	655	0	0	5.75	0.999998	454.991	0.00934016	454.981	0.0186803	455	4.10557e-05	4.12797e-05
	3.86	0.999862	656	0	656	0	656	0	0	5.73	0.999998	455.991	0.0093608	455.981	0.0187216	456	4.10562e-05	4.12808e-05
	3.85	0.999859	657	0	657	0	657	0	0	5.72	0.999998	456.991	0.00938144	456.981	0.0187629	457	4.10566e-05	4.12823e-05
	3.75	0.999822	658	0	658	0	658	0	0	5.72	0.999998	457.991	0.00940208	457.981	0.0188042	458	4.10571e-05	4.12823e-05
	3.74	0.999818	660	0	660	0	660	0	0	5.7	0.999998	458.991	0.00942273	458.981	0.0188455	459	4.10576e-05	4.12838e-05
	3.72	0.999809	661	0	661	0	661	0	0	5.68	0.999998	459.991	0.00944337	459.981	0.0188867	460	4.10581e-05	4.12849e-05
	3.7	0.9998	664	0	664	0	664	0	0	5.67	0.999998	460.991	0.00946401	460.981	0.018928	461	4.10586e-05	4.12859e-05
	3.69	0.999796	665	0	665	0	665	0	0	5.66	0.999998	461.991	0.00948466	461.981	0.0189693	462	4.10591e-05	4.12869e-05
	3.68	0.999791	666	0	666	0	666	0	0	5.65	0.999998	462.99	0.0095053	462.981	0.0190106	463	4.10596e-05	4.12885e-05
	3.66	0.999781	667	0	667	0	667	0	0	5.65	0.999998	463.99	0.00952594	463.981	0.0190519	464	4.10601e-05	4.12885e-05
	3.64	0.999771	668	0	668	0	668	0	0	5.62	0.999998	464.99	0.00954659	464.981	0.0190932	465	4.10606e-05	4.12901e-05
	3.62	0.99976	669	0	669	0	669	0	0	5.6	0.999997	465.99	0.00956723	465.981	0.0191345	466	4.10611e-05	4.12911e-05
	3.59	0.999743	670	0	670	0	670	0	0	5.59	0.999997	466.99	0.00958788	466.981	0.0191758	467	4.10616e-05	4.12921e-05
	3.57	0.999731	671	0	671	0	671	0	0	5.58	0.999997	467.99	0.00960853	467.981	0.0192171	468	4.10621e-05	4.12937e-05
	3.54	0.999712	673	0	673	0	673	0	0	5.58	0.999997	468.99	0.00962917	468.981	0.0192583	469	4.10626e-05	4.12937e-05
	3.51	0.999691	674	0	674	0	674	0	0	5.57	0.999997	469.99	0.00964982	469.981	0.0192996	470	4.10631e-05	4.12953e-05
	3.5	0.999684	675	0	675	0	675	0	0	5.56	0.999997	470.99	0.00967047	470.981	0.0193409	471	4.10636e-05	4.12963e-05
	3.49	0.999676	677	0	677	0	677	0	0	5.55	0.999997	471.99	0.00969112	471.981	0.0193822	472	4.10641e-05	4.12979e-05
	3.45	0.999645	678	0	678	0	678	0	0	5.55	0.999997	472.99	0.00971177	472.981	0.0194235	473	4.10646e-05	4.12979e-05
	3.43	0.999628	679	0	679	0	679	0	0	5.46	0.999997	473.99	0.00973242	473.981	0.0194648	474	4.10651e-05	4.12995e-05
	3.4	0.999602	680	0	680	0	680	0	0	5.44	0.999996	474.99	0.00975307	474.98	0.0195061	475	4.10656e-05	4.13011e-05
	3.39	0.999593	681	0	681	0	681	0	0	5.44	0.999996	475.99	0.00977372	475.98	0.0195474	476	4.1066e-05	4.13011e-05
	3.38	0.999583	682	0	682	0	682	0	0	5.42	0.999996	476.99	0.00979437	476.98	0.0195887	477	4.10665e-05	4.13026e-05
	3.35	0.999553	683	0	683	0	683	0	0	5.38	0.999996	477.99	0.00981502	477.98	0.01963	478	4.1067e-05	4.13037e-05
	3.34	0.999543	684	0	684	0	684	0	0	5.32	0.999995	478.99	0.00983567	478.98	0.0196713	479	4.10675e-05	4.13048e-05
	3.31	0.99951	685	0	685	0	685	0	0	5.29	0.999995	479.99	0.00985633	479.98	0.0197127	480	4.1068e-05	4.13058e-05
	3.28	0.999475	687	0	687	0	687	0	0	5.28	0.999995	480.99	0.00987698	480.98	0.019754	481	4.10685e-05	4.13074e-05
	3.27	0.999463	688	0	688	0	688	0	0	5.28	0.999995	481.99	0.00989763	481.98	0.0197953	482	4.1069e-05	4.13074e-05
	3.26	0.99945	689	0	689	0	689	0	0	5.26	0.999995	482.99	0.00991829	482.98	0.0198366	483	4.10695e-05	4.1309e-05
	3.23	0.999411	691	0	691	0	691	0	0	5.22	0.999994	483.99	0.00993894	483.98	0.0198779	484	4.107e-05	4.13106e-05
	3.22	0.999397	693	0	693	0	693	0	0	5.22	0.999994	484.99	0.0099596	484.98	0.0199192	485	4.10705e-05	4.13106e-05
	3.21	0.999383	695	0	695	0	695	0	0	5.14	0.999993	485.99	0.00998026	485.98	0.0199605	486	4.1071e-05	4.13122e-05
	3.2	0.999369	696	0	696	0	696	0	0	5.06	0.999991	486.99	0.0100009	486.98	0.0200018	487	4.10715e-05	4.13133e-05
	3.17	0.999324	698	0	698	0	698	0	0	5.04	0.999991	487.99	0.0100216	487.98	0.0200431	488	4.1072e-05	4.13144e-05
	3.15	0.999292	699	0	699	0	699	0	0	5	0.99999	488.99	0.0100422	488.98	0.0200845	489	4.10725e-05	4.1316e-05
	3.12	0.999241	701	0	701	0	701	0	0	5	0.99999	489.99	0.0100629	489.98	0.0201258	490	4.1073e-05	4.1316e-05
	3.1	0.999206	702	0	702	0	702	0	0	4.99	0.99999	490.99	0.0100835	490.98	0.0201671	491	4.10735e-05	4.13176e-05
	3.08	0.999168	703	0	703	0	703	0	0	4.96	0.999989	491.99	0.0101042	491.98	0.0202084	492	4.1074e-05	4.13187e-05
	3.06	0.999129	705	0	705	0	705	0	0	4.91	0.999988	492.99	0.0101249	492.98	0.0202497	493	4.10745e-05	4.13198e-05
	3.05	0.999109	706	0	706	0	706	0	0	4.83	0.999985	493.99	0.0101455	493.98	0.020291	494	4.1075e-05	4.13209e-05
	3.02	0.999045	708	0	708	0	708	0	0	4.8	0.999984	494.99	0.0101662	494.98	0.0203324	495	4.10755e-05	4.13219e-05
	2.99	0.998977	709	0	709	0	709	0	0	4.77	0.999983	495.99	0.0101868	495.98	0.0203737	496	4.1076e-05	4.13236e-05
	2.98	0.998953	711	0	711	0	711	0	0	4.77	0.999983	496.99	0.0102075	496.98	0.020415	497	4.10765e-05	4.13236e-05
	2.97	0.998928	712	0	712	0	712	0	0	4.75	0.999982	497.99	0.0102282	497.98	0.0204563	498	4.1077e-05	4.13252e-05
	2.96	0.998904	714	0	714	0	714	0	0	4.74	0.999982	498.99	0.0102488	498.98	0.0204977	499	4.10775e-05	4.13263e-05
	2.94	0.998852	716	0	716	0	716	0	0	4.73	0.999981	499.99	0.0102695	499.979	0.020539	500	4.1078e-05	4.13274e-05
	2.93	0.998825	717	0	717	0	717	0	0	4.72	0.999981	500.99	0.0102902	500.979	0.0205803	501	4.10785e-05	4.13285e-05
	2.92	0.998798	718	0	718	0	718	0	0	4.67	0.999979	501.99	0.0103108	501.979	0.0206217	502	4.1079e-05	4.13296e-05
	2.91	0.99877	719	0	719	0	719	0	0	4.65	0.999978	502.99	0.0103315	502.979	0.020663	503	4.10795e-05	4.13308e-05
	2.89	0.998712	721	0	721	0	721	0	0	4.64	0.999977	503.99	0.0103522	503.979	0.0207043	504	4.108e-05	4.13319e-05
	2.88	0.998682	722	0	722	0	722	0	0	4.62	0.999976	504.99	0.0103728	504.979	0.0207457	505	4.10805e-05	4.13335e-05
	2.87	0.998651	723	0	723	0	723	0	0	4.62	0.999976	505.99	0.0103935	505.979	0.020787	506	4.1081e-05	4.13335e-05
	2.86	0.99862	724	0	724	0	724	0	0	4.61	0.999975	506.99	0.0104142	506.979	0.0208283	507	4.10815e-05	4.13358e-05
	2.85	0.998587	725	0	725	0	725	0	0	4.61	0.999975	507.99	0.0104348	507.979	0.0208697	508	4.1082e-05	4.13358e-05
	2.84	0.998555	726	0	726	0	726	0	0	4.59	0.999974	508.99	0.0104555	508.979	0.020911	509	4.10825e-05	4.13375e-05
	2.83	0.998521	727	0	727	0	727	0	0	4.58	0.999974	509.99	0.0104762	509.979	0.0209523	510	4.1083e-05	4.13386e-05
	2.82	0.998486	729	0	729	0	729	0	0	4.57	0.999973	510.99	0.0104968	510.979	0.0209937	511	4.10835e-05	4.13403e-05
	2.8	0.998415	730	0	730	0	730	0	0	4.57	0.999973	511.989	0.0105175	511.979	0.021035	512	4.1084e-05	4.13403e-05
	2.77	0.998302	731	0	731	0	731	0	0	4.56	0.999972	512.989	0.0105382	512.979	0.0210764	513	4.10845e-05	4.1342e-05
	2.76	0.998262	734	0	734	0	734	0	0	4.55	0.999972	513.989	0.0105588	513.979	0.0211177	514	4.1085e-05	4.13432e-05
	2.74	0.99818	735	0	735	0	735	0	0	4.54	0.999971	514.989	0.0105795	514.979	0.021159	515	4.10855e-05	4.13443e-05
	2.72	0.998095	736	0	736	0	736	0	0	4.53	0.99997	515.989	0.0106002	515.979	0.0212004	516	4.1086e-05	4.13455e-05
	2.68	0.997911	738	0	738	0	738	0	0	4.52	0.99997	516.989	0.0106209	516.979	0.0212417	517	4.10865e-05	4.13466e-05
	2.64	0.997709	741	0	741	0	741	0	0	4.46	0.999965	517.989	0.0106415	517.979	0.0212831	518	4.1087e-05	4.13478e-05
	2.63	0.997656	742	0	742	0	742	0	0	4.42	0.999962	518.989	0.0106622	518.979	0.0213244	519	4.10875e-05	4.13489e-05
	2.6	0.997488	743	0	743	0	743	0	0	4.41	0.999961	519.989	0.0106829	519.979	0.0213658	520	4.1088e-05	4.13507e-05
	2.58	0.99737	744	0	744	0	744	0	0	4.41	0.999961	520.989	0.0107036	520.979	0.0214071	521	4.10885e-05	4.13507e-05
	2.57	0.997308	746	0	746	0	746	0	0	4.38	0.999958	521.989	0.0107242	521.979	0.0214485	522	4.10891e-05	4.1353e-05
	2.54	0.997116	747	0	747	0	747	0	0	4.38	0.999958	522.989	0.0107449	522.979	0.0214898	523	4.10896e-05	4.1353e-05
	2.49	0.996764	749	0	749	0	749	0	0	4.35	0.999955	523.989	0.0107656	523.978	0.0215312	524	4.10901e-05	4.13548e-05
	2.46	0.996533	750	0	750	0	750	0	0	4.3	0.99995	524.989	0.0107863	524.978	0.0215725	525	4.10906e-05	4.13566e-05
	2.45	0.996452	751	0	751	0	751	0	0	4.3	0.99995	525.989	0.010807	525.978	0.0216139	526	4.10911e-05	4.13566e-05
	2.44	0.996369	753	0	753	0	753	0	0	4.29	0.999949	526.989	0.0108276	526.978	0.0216553	527	4.10916e-05	4.1359e-05
	2.43	0.996285	754	0	754	0	754	0	0	4.29	0.999949	527.989	0.0108483	527.978	0.0216966	528	4.10921e-05	4.1359e-05
	2.4	0.996019	755	0	755	0	755	0	0	4.28	0.999948	528.989	0.010869	528.978	0.021738	529	4.10926e-05	4.13608e-05
	2.39	0.995926	757	0	757	0	757	0	0	4.26	0.999945	529.989	0.0108897	529.978	0.0217793	530	4.10931e-05	4.1362e-05
	2.38	0.995831	758	0	758	0	758	0	0	4.25	0.999944	530.989	0.0109104	530.978	0.0218207	531	4.10936e-05	4.13632e-05
	2.36	0.995635	759	0	759	0	759	0	0	4.24	0.999942	531.989	0.010931	531.978	0.0218621	532	4.10941e-05	4.13644e-05
	2.35	0.995533	761	0	761	0	761	0	0	4.23	0.999941	532.989	0.0109517	532.978	0.0219034	533	4.10946e-05	4.13663e-05
	2.34	0.995429	762	0	762	0	762	0	0	4.23	0.999941	533.989	0.0109724	533.978	0.0219448	534	4.10951e-05	4.13663e-05
	2.33	0.995323	763	0	763	0	763	0	0	4.22	0.99994	534.989	0.0109931	534.978	0.0219862	535	4.10957e-05	4.13681e-05
	2.31	0.995102	765	0	765	0	765	0	0	4.21	0.999938	535.989	0.0110138	535.978	0.0220275	536	4.10962e-05	4.13694e-05
	2.3	0.994988	766	0	766	0	766	0	0	4.2	0.999937	536.989	0.0110345	536.978	0.0220689	537	4.10967e-05	4.13706e-05
	2.28	0.994752	767	0	767	0	767	0	0	4.19	0.999935	537.989	0.0110551	537.978	0.0221103	538	4.10972e-05	4.13719e-05
	2.26	0.994505	769	0	769	0	769	0	0	4.18	0.999934	538.989	0.0110758	538.978	0.0221517	539	4.10977e-05	4.13731e-05
	2.25	0.994377	770	0	770	0	770	0	0	4.16	0.999931	539.989	0.0110965	539.978	0.022193	540	4.10982e-05	4.13744e-05
	2.24	0.994246	772	0	772	0	772	0	0	4.14	0.999928	540.989	0.0111172	540.978	0.0222344	541	4.10987e-05	4.13763e-05
	2.23	0.994112	773	0	773	0	773	0	0	4.14	0.999928	541.989	0.0111379	541.978	0.0222758	542	4.10992e-05	4.13763e-05
	2.22	0.993974	774	0	774	0	774	0	0	4.13	0.999926	542.989	0.0111586	542.978	0.0223172	543	4.10998e-05	4.13788e-05
	2.21	0.993834	778	0	778	0	778	0	0	4.13	0.999926	543.989	0.0111793	543.978	0.0223585	544	4.11003e-05	4.13788e-05
	2.2	0.99369	779	0	779	0	779	0	0	4.12	0.999924	544.989	0.0112	544.978	0.0223999	545	4.11008e-05	4.13814e-05
	2.19	0.993543	781	0	781	0	781	0	0	4.12	0.999924	545.989	0.0112207	545.978	0.0224413	546	4.11013e-05	4.13814e-05
	2.18	0.993393	783	0	783	0	783	0	0	4.08	0.999917	546.989	0.0112413	546.978	0.0224827	547	4.11018e-05	4.13834e-05
	2.17	0.993239	785	0	785	0	785	0	0	4.07	0.999915	547.989	0.011262	547.977	0.0225241	548	4.11023e-05	4.13854e-05
	2.16	0.993082	786	0	786	0	786	0	0	4.07	0.999915	548.989	0.0112827	548.977	0.0225655	549	4.11028e-05	4.13854e-05
	2.15	0.992921	787	0	787	0	787	0	0	4.05	0.999911	549.989	0.0113034	549.977	0.0226068	550	4.11034e-05	4.13887e-05
	2.14	0.992756	788	0	788	0	788	0	0	4.05	0.999911	550.989	0.0113241	550.977	0.0226482	551	4.11039e-05	4.13887e-05
	2.13	0.992587	791	0	791	0	791	0	0	4.05	0.999911	551.989	0.0113448	551.977	0.0226896	552	4.11044e-05	4.13887e-05
	2.12	0.992414	792	0	792	0	792	0	0	4.04	0.999909	552.989	0.0113655	552.977	0.022731	553	4.11049e-05	4.13921e-05
	2.11	0.992238	794	0	794	0	794	0	0	4.04	0.999909	553.989	0.0113862	553.977	0.0227724	554	4.11054e-05	4.13921e-05
	2.1	0.992057	796	0	796	0	796	0	0	4.03	0.999907	554.989	0.0114069	554.977	0.0228138	555	4.1106e-05	4.13941e-05
	2.09	0.991872	800	0	800	0	800	0	0	4.02	0.999905	555.989	0.0114276	555.977	0.0228552	556	4.11065e-05	4.13969e-05
	2.08	0.991682	803	0	803	0	803	0	0	4.02	0.999905	556.989	0.0114483	556.977	0.0228966	557	4.1107e-05	4.13969e-05
	2.07	0.991489	805	0	805	0	805	0	0	4.02	0.999905	557.989	0.011469	557.977	0.022938	558	4.11075e-05	4.13969e-05
	2.06	0.99129	812	0	812	0	812	0	0	4.01	0.999902	558.989	0.0114897	558.977	0.0229794	559	4.1108e-05	4.14039e-05
	2.05	0.991087	815	0	815	0	815	0	0	4.01	0.999902	559.988	0.0115104	559.977	0.0230208	560	4.11086e-05	4.14039e-05
	2.04	0.99088	822	0	822	0	822	0	0	4.01	0.999902	560.988	0.0115311	560.977	0.0230622	561	4.11091e-05	4.14039e-05
	2.03	0.990667	828	0	828	0	828	0	0	4.01	0.999902	561.988	0.0115518	561.977	0.0231036	562	4.11096e-05	4.14039e-05
	2.02	0.99045	835	0	835	0	835	0	0	4.01	0.999902	562.988	0.0115725	562.977	0.023145	563	4.11101e-05	4.14039e-05
	2.01	0.990228	860	0	860	0	860	0	0	4.01	0.999902	563.988	0.0115932	563.977	0.0231864	564	4.11107e-05	4.14039e-05
	2	0.99	1147	0	1147	0	1147	0	0	4.01	0.999902	564.988	0.0116139	564.977	0.0232278	565	4.11112e-05	4.14039e-05
	1.92	0.987977	1148	0	1148	0	1148	0	0	4	0.9999	565.988	0.0116346	565.977	0.0232692	566	4.11117e-05	4.14844e-05
	1.89	0.987118	1151	0	1151	0	1151	0	0	4	0.9999	566.988	0.0116553	566.977	0.0233106	567	4.11123e-05	4.14844e-05
	1.85	0.985875	1153	0	1153	0	1153	0	0	4	0.9999	567.988	0.011676	567.977	0.0233521	568	4.11128e-05	4.14844e-05
	1.82	0.984864	1157	0	1157	0	1157	0	0	4	0.9999	568.988	0.0116967	568.977	0.0233935	569	4.11133e-05	4.14844e-05
	1.81	0.984512	1158	0	1158	0	1158	0	0	4	0.9999	569.988	0.0117174	569.977	0.0234349	570	4.11138e-05	4.14844e-05
	1.8	0.984151	1162	0	1162	0	1162	0	0	4	0.9999	570.988	0.0117382	570.977	0.0234763	571	4.11144e-05	4.14844e-05
	1.77	0.983018	1166	0	1166	0	1166	0	0	4	0.9999	571.988	0.0117589	571.976	0.0235177	572	4.11149e-05	4.14844e-05
	1.75	0.982217	1168	0	1168	0	1168	0	0	4	0.9999	572.988	0.0117796	572.976	0.0235591	573	4.11154e-05	4.14844e-05
	1.74	0.981803	1169	0	1169	0	1169	0	0	4	0.9999	573.988	0.0118003	573.976	0.0236006	574	4.1116e-05	4.14844e-05
	1.72	0.980945	1171	0	1171	0	1171	0	0	4	0.9999	574.988	0.011821	574.976	0.023642	575	4.11165e-05	4.14844e-05
	1.7	0.980047	1172	0	1172	0	1172	0	0	4	0.9999	575.988	0.0118417	575.976	0.0236834	576	4.1117e-05	4.14844e-05
	1.68	0.979107	1173	0	1173	0	1173	0	0	4	0.9999	576.988	0.0118624	576.976	0.0237248	577	4.11176e-05	4.14844e-05
	1.66	0.978122	1176	0	1176	0	1176	0	0	4	0.9999	577.988	0.0118831	577.976	0.0237663	578	4.11181e-05	4.14844e-05
	1.64	0.977091	1179	0	1179	0	1179	0	0	4	0.9999	578.988	0.0119039	578.976	0.0238077	579	4.11187e-05	4.14844e-05
	1.62	0.976012	1180	0	1180	0	1180	0	0	4	0.9999	579.988	0.0119246	579.976	0.0238491	580	4.11192e-05	4.14844e-05
	1.61	0.975453	1181	0	1181	0	1181	0	0	4	0.9999	580.988	0.0119453	580.976	0.0238906	581	4.11197e-05	4.14844e-05
	1.6	0.974881	1184	0	1184	0	1184	0	0	4	0.9999	581.988	0.011966	581.976	0.023932	582	4.11203e-05	4.14844e-05
	1.59	0.974296	1187	0	1187	0	1187	0	0	4	0.9999	582.988	0.0119867	582.976	0.0239734	583	4.11208e-05	4.14844e-05
	1.57	0.973085	1190	0	1190	0	1190	0	0	4	0.9999	583.988	0.0120074	583.976	0.0240149	584	4.11214e-05	4.14844e-05
	1.54	0.97116	1191	0	1191	0	1191	0	0	4	0.9999	584.988	0.0120282	584.976	0.0240563	585	4.11219e-05	4.14844e-05
	1.52	0.9698	1192	0	1192	0	1192	0	0	4	0.9999	585.988	0.0120489	585.976	0.0240978	586	4.11225e-05	4.14844e-05
	1.51	0.969097	1193	0	1193	0	1193	0	0	4	0.9999	586.988	0.0120696	586.976	0.0241392	587	4.1123e-05	4.14844e-05
	1.49	0.967641	1193	1	1192	2	1194	0.00167504	0.00163666	4	0.9999	587.988	0.0120903	587.976	0.0241806	588	4.11235e-05	4.14844e-05
	1.48	0.966887	1194	1	1193	2	1195	0.00167364	0.00163666	4	0.9999	588.988	0.012111	588.976	0.0242221	589	4.11241e-05	4.14844e-05
	1.47	0.966116	1195	1	1194	2	1196	0.00167224	0.00163666	4	0.9999	589.988	0.0121318	589.976	0.0242635	590	4.11246e-05	4.14844e-05
	1.46	0.965326	1199	1	1198	2	1200	0.00166667	0.00163666	4	0.9999	590.988	0.0121525	590.976	0.024305	591	4.11252e-05	4.14844e-05
	1.44	0.963692	1202	1	1201	2	1203	0.00166251	0.00163666	4	0.9999	591.988	0.0121732	591.976	0.0243464	592	4.11258e-05	4.14844e-05
	1.43	0.962846	1203	1	1202	2	1204	0.00166113	0.00163666	4	0.9999	592.988	0.0121939	592.976	0.0243879	593	4.11263e-05	4.14844e-05
	1.42	0.961981	1204	1	1203	2	1205	0.00165975	0.00163666	4	0.9999	593.988	0.0122147	593.976	0.0244294	594	4.11269e-05	4.14844e-05
	1.41	0.961095	1205	1	1204	2	1206	0.00165837	0.00163666	4	0.9999	594.988	0.0122354	594.976	0.0244708	595	4.11274e-05	4.14844e-05
	1.39	0.959262	1206	1	1205	2	1207	0.001657	0.00163666	4	0.9999	595.988	0.0122561	595.975	0.0245123	596	4.1128e-05	4.14844e-05
	1.38	0.958313	1207	1	1206	2	1208	0.00165563	0.00163666	4	0.9999	596.988	0.0122769	596.975	0.0245537	597	4.11285e-05	4.14844e-05
	1.36	0.956348	1208	1	1207	2	1209	0.00165426	0.00163666	4	0.9999	597.988	0.0122976	597.975	0.0245952	598	4.11291e-05	4.14844e-05
	1.33	0.953226	1209	1	1208	2	1210	0.00165289	0.00163666	4	0.9999	598.988	0.0123183	598.975	0.0246367	599	4.11297e-05	4.14844e-05
	1.32	0.952137	1210	1	1209	2	1211	0.00165153	0.00163666	4	0.9999	599.988	0.0123391	599.975	0.0246781	600	4.11302e-05	4.14844e-05
	1.3	0.949881	1211	1	1210	2	1212	0.00165017	0.00163666	4	0.9999	600.988	0.0123598	600.975	0.0247196	601	4.11308e-05	4.14844e-05
	1.28	0.947519	1213	1	1212	2	1214	0.00164745	0.00163666	4	0.9999	601.988	0.0123805	601.975	0.0247611	602	4.11314e-05	4.14844e-05
	1.26	0.945046	1214	1	1213	2	1215	0.00164609	0.00163666	4	0.9999	602.988	0.0124013	602.975	0.0248025	603	4.11319e-05	4.14844e-05
	1.25	0.943766	1215	1	1214	2	1216	0.00164474	0.00163666	4	0.9999	603.988	0.012422	603.975	0.024844	604	4.11325e-05	4.14844e-05
	1.24	0.942456	1220	1	1219	2	1221	0.001638	0.00163666	4	0.9999	604.988	0.0124428	604.975	0.0248855	605	4.11331e-05	4.14844e-05
	1.22	0.939744	1221	1	1220	2	1222	0.00163666	0.00163666	4	0.9999	605.988	0.0124635	605.975	0.024927	606	4.11336e-05	4.14844e-05
	1.21	0.938341	1221	2	1219	4	1223	0.00327065	0.00306513	4	0.9999	606.988	0.0124842	606.975	0.0249685	607	4.11342e-05	4.14844e-05
	1.2	0.936904	1222	2	1220	4	1224	0.00326797	0.00306513	4	0.9999	607.987	0.012505	607.975	0.0250099	608	4.11348e-05	4.14844e-05
	1.19	0.935435	1225	2	1223	4	1227	0.00325998	0.00306513	4	0.9999	608.987	0.0125257	608.975	0.0250514	609	4.11354e-05	4.14844e-05
	1.16	0.930817	1227	2	1225	4	1229	0.00325468	0.00306513	4	0.9999	609.987	0.0125465	609.975	0.0250929	610	4.11359e-05	4.14844e-05
	1.15	0.929205	1228	2	1226	4	1230	0.00325203	0.00306513	4	0.9999	610.987	0.0125672	610.975	0.0251344	611	4.11365e-05	4.14844e-05
	1.14	0.927556	1229	2	1227	4	1231	0.00324939	0.00306513	4	0.9999	611.987	0.012588	611.975	0.0251759	612	4.11371e-05	4.14844e-05
	1.13	0.925869	1231	2	1229	4	1233	0.00324412	0.00306513	4	0.9999	612.987	0.0126087	612.975	0.0252174	613	4.11377e-05	4.14844e-05
	1.12	0.924142	1232	2	1230	4	1234	0.00324149	0.00306513	4	0.9999	613.987	0.0126295	613.975	0.0252589	614	4.11383e-05	4.14844e-05
	1.11	0.922375	1233	2	1231	4	1235	0.00323887	0.00306513	4	0.9999	614.987	0.0126502	614.975	0.0253004	615	4.11389e-05	4.14844e-05
	1.1	0.920567	1235	2	1233	4	1237	0.00323363	0.00306513	4	0.9999	615.987	0.012671	615.975	0.0253419	616	4.11395e-05	4.14844e-05
	1.09	0.918717	1236	2	1234	4	1238	0.00323102	0.00306513	4	0.9999	616.987	0.0126917	616.975	0.0253834	617	4.114e-05	4.14844e-05
	1.08	0.916824	1237	2	1235	4	1239	0.00322841	0.00306513	4	0.9999	617.987	0.0127125	617.975	0.0254249	618	4.11406e-05	4.14844e-05
	1.06	0.912904	1241	2	1239	4	1243	0.00321802	0.00306513	4	0.9999	618.987	0.0127332	618.975	0.0254664	619	4.11412e-05	4.14844e-05
	1.05	0.910875	1242	2	1240	4	1244	0.00321543	0.00306513	4	0.9999	619.987	0.012754	619.974	0.0255079	620	4.11418e-05	4.14844e-05
	1.03	0.906675	1243	2	1241	4	1245	0.00321285	0.00306513	4	0.9999	620.987	0.0127747	620.974	0.0255495	621	4.11424e-05	4.14844e-05
	1.02	0.904501	1246	2	1244	4	1248	0.00320513	0.00306513	4	0.9999	621.987	0.0127955	621.974	0.025591	622	4.1143e-05	4.14844e-05
	0.99	0.897671	1248	2	1246	4	1250	0.0032	0.00306513	4	0.9999	622.987	0.0128162	622.974	0.0256325	623	4.11436e-05	4.14844e-05
	0.97	0.892848	1249	2	1247	4	1251	0.00319744	0.00306513	4	0.9999	623.987	0.012837	623.974	0.025674	624	4.11443e-05	4.14844e-05
	0.96	0.890352	1250	2	1248	4	1252	0.00319489	0.00306513	4	0.9999	624.987	0.0128578	624.974	0.0257155	625	4.11449e-05	4.14844e-05
	0.95	0.887798	1252	2	1250	4	1254	0.00318979	0.00306513	4	0.9999	625.987	0.0128785	625.974	0.0257571	626	4.11455e-05	4.14844e-05
	0.94	0.885185	1253	2	1251	4	1255	0.00318725	0.00306513	4	0.9999	626.987	0.0128993	626.974	0.0257986	627	4.11461e-05	4.14844e-05
	0.93	0.88251	1254	2	1252	4	1256	0.00318471	0.00306513	4	0.9999	627.987	0.0129201	627.974	0.0258401	628	4.11467e-05	4.14844e-05
	0.91	0.876973	1258	2	1256	4	1260	0.0031746	0.00306513	4	0.9999	628.987	0.0129408	628.974	0.0258817	629	4.11473e-05	4.14844e-05
	0.9	0.874107	1259	2	1257	4	1261	0.00317209	0.00306513	4	0.9999	629.987	0.0129616	629.974	0.0259232	630	4.1148e-05	4.14844e-05
	0.89	0.871175	1261	2	1259	4	1263	0.00316706	0.00306513	4	0.9999	630.987	0.0129824	630.974	0.0259648	631	4.11486e-05	4.14844e-05
	0.88	0.868174	1263	2	1261	4	1265	0.00316206	0.00306513	4	0.9999	631.987	0.0130031	631.974	0.0260063	632	4.11492e-05	4.14844e-05
	0.85	0.858746	1268	2	1266	4	1270	0.00314961	0.00306513	4	0.9999	632.987	0.0130239	632.974	0.0260478	633	4.11498e-05	4.14844e-05
	0.84	0.855456	1269	2	1267	4	1271	0.00314713	0.00306513	4	0.9999	633.987	0.0130447	633.974	0.0260894	634	4.11505e-05	4.14844e-05
	0.83	0.852089	1272	2	1270	4	1274	0.00313972	0.00306513	4	0.9999	634.987	0.0130655	634.974	0.026131	635	4.11511e-05	4.14844e-05
	0.81	0.845118	1274	2	1272	4	1276	0.0031348	0.00306513	4	0.9999	635.987	0.0130863	635.974	0.0261725	636	4.11517e-05	4.14844e-05
	0.8	0.841511	1275	2	1273	4	1277	0.00313234	0.00306513	4	0.9999	636.987	0.013107	636.974	0.0262141	637	4.11524e-05	4.14844e-05
	0.79	0.837819	1280	2	1278	4	1282	0.00312012	0.00306513	4	0.9999	637.987	0.0131278	637.974	0.0262556	638	4.1153e-05	4.14844e-05
	0.77	0.830176	1281	2	1279	4	1283	0.00311769	0.00306513	4	0.9999	638.987	0.0131486	638.974	0.0262972	639	4.11537e-05	4.14844e-05
	0.74	0.81803	1283	2	1281	4	1285	0.00311284	0.00306513	4	0.9999	639.987	0.0131694	639.974	0.0263388	640	4.11543e-05	4.14844e-05
	0.73	0.813791	1284	2	1282	4	1286	0.00311042	0.00306513	4	0.9999	640.987	0.0131902	640.974	0.0263804	641	4.1155e-05	4.14844e-05
	0.72	0.809454	1286	2	1284	4	1288	0.00310559	0.00306513	4	0.9999	641.987	0.013211	641.974	0.0264219	642	4.11557e-05	4.14844e-05
	0.71	0.805016	1287	2	1285	4	1289	0.00310318	0.00306513	4	0.9999	642.987	0.0132318	642.974	0.0264635	643	4.11563e-05	4.14844e-05
	0.7	0.800474	1291	2	1289	4	1293	0.00309358	0.00306513	4	0.9999	643.987	0.0132525	643.973	0.0265051	644	4.1157e-05	4.14844e-05
	0.69	0.795826	1292	2	1290	4	1294	0.00309119	0.00306513	4	0.9999	644.987	0.0132733	644.973	0.0265467	645	4.11576e-05	4.14844e-05
	0.68	0.79107	1294	2	1292	4	1296	0.00308642	0.00306513	4	0.9999	645.987	0.0132941	645.973	0.0265883	646	4.11583e-05	4.14844e-05
	0.67	0.786204	1296	2	1294	4	1298	0.00308166	0.00306513	4	0.9999	646.987	0.0133149	646.973	0.0266299	647	4.1159e-05	4.14844e-05
	0.66	0.781224	1297	2	1295	4	1299	0.00307929	0.00306513	4	0.9999	647.987	0.0133357	647.973	0.0266715	648	4.11597e-05	4.14844e-05
	0.64	0.770913	1300	2	1298	4	1302	0.0030722	0.00306513	4	0.9999	648.987	0.0133565	648.973	0.0267131	649	4.11604e-05	4.14844e-05
	0.63	0.765577	1303	2	1301	4	1305	0.00306513	0.00306513	4	0.9999	649.987	0.0133773	649.973	0.0267547	650	4.1161e-05	4.14844e-05
	0.62	0.760117	1305	3	1302	6	1308	0.00458716	0.00458015	3.96	0.99989	650.987	0.0133981	650.973	0.0267963	651	4.11617e-05	4.1615e-05
	0.61	0.754529	1307	3	1304	6	1310	0.00458015	0.00458015	3.96	0.99989	651.987	0.013419	651.973	0.0268379	652	4.11624e-05	4.1615e-05
	0.58	0.736973	1309	4	1305	8	1313	0.00609292	0.00606061	3.96	0.99989	652.987	0.0134398	652.973	0.0268795	653	4.11631e-05	4.1615e-05
	0.57	0.730847	1310	4	1306	8	1314	0.00608828	0.00606061	3.9	0.999874	653.987	0.0134606	653.973	0.0269211	654	4.11638e-05	4.16232e-05
	0.56	0.724577	1313	4	1309	8	1317	0.00607441	0.00606061	3.88	0.999868	654.987	0.0134814	654.973	0.0269628	655	4.11645e-05	4.16274e-05
	0.55	0.718162	1314	4	1310	8	1318	0.0060698	0.00606061	3.86	0.999862	655.986	0.0135022	655.973	0.0270044	656	4.11653e-05	4.16317e-05
	0.53	0.704879	1316	4	1312	8	1320	0.00606061	0.00606061	3.85	0.999859	656.986	0.013523	656.973	0.027046	657	4.1166e-05	4.1636e-05
	0.52	0.698005	1318	5	1313	10	1323	0.00755858	0.00754717	3.75	0.999822	657.986	0.0135438	657.973	0.0270877	658	4.11667e-05	4.16404e-05
	0.51	0.69097	1320	5	1315	10	1325	0.00754717	0.00754717	3.74	0.999818	658.986	0.0135647	658.973	0.0271293	659	4.11674e-05	4.16472e-05
	0.49	0.676406	1321	6	1315	12	1327	0.00904295	0.00901578	3.74	0.999818	659.986	0.0135855	659.973	0.027171	660	4.11681e-05	4.16472e-05
	0.48	0.668869	1322	6	1316	12	1328	0.00903614	0.00901578	3.72	0.999809	660.986	0.0136063	660.973	0.0272126	661	4.11689e-05	4.16541e-05
	0.47	0.661156	1325	6	1319	12	1331	0.00901578	0.00901578	3.7	0.9998	661.986	0.0136271	661.973	0.0272543	662	4.11696e-05	4.16636e-05
	0.46	0.653263	1328	7	1321	14	1335	0.0104869	0.0104478	3.7	0.9998	662.986	0.013648	662.973	0.027296	663	4.11704e-05	4.16636e-05
	0.45	0.645187	1329	7	1322	14	1336	0.010479	0.0104478	3.7	0.9998	663.986	0.0136688	663.973	0.0273376	664	4.11711e-05	4.16636e-05
	0.43	0.628465	1330	7	1323	14	1337	0.0104712	0.0104478	3.69	0.999796	664.986	0.0136896	664.973	0.0273793	665	4.11719e-05	4.16735e-05
	0.41	0.610955	1333	7	1326	14	1340	0.0104478	0.0104478	3.68	0.999791	665.986	0.0137105	665.973	0.027421	666	4.11726e-05	4.16785e-05
	0.4	0.601893	1334	10	1324	20	1344	0.014881	0.0147167	3.66	0.999781	666.986	0.0137313	666.973	0.0274627	667	4.11734e-05	4.16837e-05
	0.39	0.59262	1335	10	1325	20	1345	0.0148699	0.0147167	3.64	0.999771	667.986	0.0137522	667.972	0.0275043	668	4.11742e-05	4.16889e-05
	0.38	0.583131	1337	10	1327	20	1347	0.0148478	0.0147167	3.62	0.99976	668.986	0.013773	668.972	0.027546	669	4.11749e-05	4.16942e-05
	0.37	0.57342	1341	10	1331	20	1351	0.0148038	0.0147167	3.59	0.999743	669.986	0.0137939	669.972	0.0275877	670	4.11757e-05	4.16996e-05
	0.36	0.563484	1342	10	1332	20	1352	0.0147929	0.0147167	3.57	0.999731	670.986	0.0138147	670.972	0.0276294	671	4.11765e-05	4.17051e-05
	0.35	0.553316	1344	10	1334	20	1354	0.014771	0.0147167	3.54	0.999712	671.986	0.0138356	671.972	0.0276712	672	4.11773e-05	4.17136e-05
	0.34	0.542912	1345	10	1335	20	1355	0.0147601	0.0147167	3.54	0.999712	672.986	0.0138564	672.972	0.0277129	673	4.11781e-05	4.17136e-05
	0.33	0.532265	1349	10	1339	20	1359	0.0147167	0.0147167	3.51	0.999691	673.986	0.0138773	673.972	0.0277546	674	4.11789e-05	4.17222e-05
	0.32	0.52137	1350	11	1339	22	1361	0.0161646	0.0160936	3.5	0.999684	674.986	0.0138982	674.972	0.0277963	675	4.11797e-05	4.17281e-05
	0.31	0.510221	1353	11	1342	22	1364	0.016129	0.0160936	3.49	0.999676	675.986	0.013919	675.972	0.0278381	676	4.11806e-05	4.17372e-05
	0.3	0.498813	1356	11	1345	22	1367	0.0160936	0.0160936	3.49	0.999676	676.986	0.0139399	676.972	0.0278798	677	4.11814e-05	4.17372e-05
	0.29	0.487139	1359	13	1346	26	1372	0.0189504	0.0188679	3.45	0.999645	677.986	0.0139608	677.972	0.0279215	678	4.11822e-05	4.17465e-05
	0.28	0.475193	1360	13	1347	26	1373	0.0189366	0.0188679	3.43	0.999628	678.986	0.0139816	678.972	0.0279633	679	4.11831e-05	4.17528e-05
	0.27	0.462968	1363	13	1350	26	1376	0.0188953	0.0188679	3.4	0.999602	679.986	0.0140025	679.972	0.0280051	680	4.11839e-05	4.17593e-05
	0.26	0.450459	1365	13	1352	26	1378	0.0188679	0.0188679	3.39	0.999593	680.986	0.0140234	680.972	0.0280468	681	4.11848e-05	4.17659e-05
	0.25	0.437659	1366	14	1352	28	1380	0.0202899	0.0200717	3.38	0.999583	681.986	0.0140443	681.972	0.0280886	682	4.11856e-05	4.17726e-05
	0.24	0.42456	1371	14	1357	28	1385	0.0202166	0.0200717	3.35	0.999553	682.986	0.0140652	682.972	0.0281304	683	4.11865e-05	4.17794e-05
	0.23	0.411156	1374	14	1360	28	1388	0.0201729	0.0200717	3.34	0.999543	683.986	0.0140861	683.972	0.0281722	684	4.11874e-05	4.17863e-05
	0.22	0.39744	1377	14	1363	28	1391	0.0201294	0.0200717	3.31	0.99951	684.986	0.014107	684.972	0.028214	685	4.11883e-05	4.17934e-05
	0.21	0.383405	1379	14	1365	28	1393	0.0201005	0.0200717	3.28	0.999475	685.986	0.0141279	685.972	0.0282558	686	4.11891e-05	4.18043e-05
	0.2	0.369043	1381	14	1367	28	1395	0.0200717	0.0200717	3.28	0.999475	686.986	0.0141488	686.972	0.0282976	687	4.119e-05	4.18043e-05
	0.19	0.354346	1382	15	1367	30	1397	0.0214746	0.021398	3.27	0.999463	687.986	0.0141697	687.972	0.0283394	688	4.1191e-05	4.18154e-05
	0.18	0.339307	1385	15	1370	30	1400	0.0214286	0.021398	3.26	0.99945	688.986	0.0141906	688.972	0.0283812	689	4.11919e-05	4.1823e-05
	0.17	0.323917	1387	15	1372	30	1402	0.021398	0.021398	3.23	0.999411	689.986	0.0142115	689.972	0.028423	690	4.11928e-05	4.18347e-05
	0.15	0.292054	1389	20	1369	40	1409	0.0283889	0.0283889	3.23	0.999411	690.986	0.0142324	690.972	0.0284649	691	4.11937e-05	4.18347e-05
	0.14	0.275564	1396	23	1373	46	1419	0.0324172	0.0324172	3.22	0.999397	691.986	0.0142534	691.971	0.0285067	692	4.11947e-05	4.18508e-05
	0.13	0.25869	1400	25	1375	50	1425	0.0350877	0.0350877	3.22	0.999397	692.986	0.0142743	692.971	0.0285486	693	4.11956e-05	4.18508e-05
	0.12	0.241422	1403	29	1374	58	1432	0.0405028	0.0405028	3.21	0.999383	693.986	0.0142952	693.971	0.0285904	694	4.11966e-05	4.18675e-05
	0.11	0.223753	1408	32	1376	64	1440	0.0444444	0.0444444	3.21	0.999383	694.986	0.0143162	694.971	0.0286323	695	4.11976e-05	4.18675e-05
	0.1	0.205672	1414	33	1381	66	1447	0.0456116	0.0456116	3.2	0.999369	695.986	0.0143371	695.971	0.0286742	696	4.11985e-05	4.18804e-05
	0.09	0.187169	1421	37	1384	74	1458	0.0507545	0.0507545	3.17	0.999324	696.986	0.014358	696.971	0.0287161	697	4.11995e-05	4.18938e-05
	0.08	0.168236	1428	45	1383	90	1473	0.0610998	0.0610998	3.17	0.999324	697.986	0.014379	697.971	0.028758	698	4.12005e-05	4.18938e-05
	0.07	0.148862	1435	53	1382	106	1488	0.0712366	0.0712366	3.15	0.999292	698.986	0.0143999	698.971	0.0287999	699	4.12015e-05	4.19075e-05
	0.06	0.129036	1452	61	1391	122	1513	0.0806345	0.0806345	3.12	0.999241	699.986	0.0144209	699.971	0.0288418	700	4.12026e-05	4.19216e-05
	0.05	0.108749	1467	68	1399	136	1535	0.0885993	0.0885993	3.12	0.999241	700.986	0.0144419	700.971	0.0288837	701	4.12036e-05	4.19216e-05
										3.1	0.999206	701.986	0.0144628	701.971	0.0289257	702	4.12046e-05	4.19361e-05
										3.08	0.999168	702.986	0.0144838	702.971	0.0289676	703	4.12057e-05	4.1946e-05
										3.06	0.999129	703.985	0.0145048	703.971	0.0290096	704	4.12068e-05	4.19612e-05
										3.06	0.999129	704.985	0.0145258	704.971	0.0290515	705	4.12078e-05	4.19612e-05
										3.05	0.999109	705.985	0.0145468	705.971	0.0290935	706	4.12089e-05	4.19769e-05
										3.02	0.999045	706.985	0.0145677	706.971	0.0291355	707	4.121e-05	4.1993e-05
										3.02	0.999045	707.985	0.0145887	707.971	0.0291775	708	4.12111e-05	4.1993e-05
										2.99	0.998977	708.985	0.0146098	708.971	0.0292195	709	4.12123e-05	4.20096e-05
										2.98	0.998953	709.985	0.0146308	709.971	0.0292615	710	4.12134e-05	4.20267e-05
										2.98	0.998953	710.985	0.0146518	710.971	0.0293036	711	4.12146e-05	4.20267e-05
										2.97	0.998928	711.985	0.0146728	711.971	0.0293456	712	4.12157e-05	4.20443e-05
										2.96	0.998904	712.985	0.0146938	712.971	0.0293877	713	4.12169e-05	4.20624e-05
										2.96	0.998904	713.985	0.0147149	713.971	0.0294297	714	4.12181e-05	4.20624e-05
										2.94	0.998852	714.985	0.0147359	714.971	0.0294718	715	4.12193e-05	4.20874e-05
										2.94	0.998852	715.985	0.014757	715.97	0.0295139	716	4.12205e-05	4.20874e-05
										2.93	0.998825	716.985	0.014778	716.97	0.029556	717	4.12218e-05	4.21067e-05
										2.92	0.998798	717.985	0.0147991	717.97	0.0295981	718	4.1223e-05	4.212e-05
										2.91	0.99877	718.985	0.0148201	718.97	0.0296403	719	4.12243e-05	4.21335e-05
										2.89	0.998712	719.985	0.0148412	719.97	0.0296824	720	4.12256e-05	4.21543e-05
										2.89	0.998712	720.985	0.0148623	720.97	0.0297246	721	4.12269e-05	4.21543e-05
										2.88	0.998682	721.985	0.0148834	721.97	0.0297667	722	4.12282e-05	4.21757e-05
										2.87	0.998651	722.985	0.0149045	722.97	0.0298089	723	4.12295e-05	4.21903e-05
										2.86	0.99862	723.985	0.0149256	723.97	0.0298511	724	4.12309e-05	4.22052e-05
										2.85	0.998587	724.985	0.0149467	724.97	0.0298934	725	4.12322e-05	4.22205e-05
										2.84	0.998555	725.985	0.0149678	725.97	0.0299356	726	4.12336e-05	4.2236e-05
										2.83	0.998521	726.985	0.0149889	726.97	0.0299778	727	4.1235e-05	4.22518e-05
										2.82	0.998486	727.985	0.0150101	727.97	0.0300201	728	4.12364e-05	4.22762e-05
										2.82	0.998486	728.985	0.0150312	728.97	0.0300624	729	4.12379e-05	4.22762e-05
										2.8	0.998415	729.985	0.0150524	729.97	0.0301047	730	4.12393e-05	4.23013e-05
										2.77	0.998302	730.985	0.0150735	730.97	0.030147	731	4.12408e-05	4.23184e-05
										2.76	0.998262	731.985	0.0150947	731.97	0.0301894	732	4.12423e-05	4.23538e-05
										2.76	0.998262	732.985	0.0151159	732.97	0.0302317	733	4.12438e-05	4.23538e-05
										2.76	0.998262	733.985	0.015137	733.97	0.0302741	734	4.12453e-05	4.23538e-05
										2.74	0.99818	734.985	0.0151582	734.97	0.0303165	735	4.12469e-05	4.23906e-05
										2.72	0.998095	735.985	0.0151794	735.97	0.0303589	736	4.12485e-05	4.24095e-05
										2.68	0.997911	736.985	0.0152007	736.97	0.0304013	737	4.12501e-05	4.24387e-05
										2.68	0.997911	737.985	0.0152219	737.97	0.0304438	738	4.12517e-05	4.24387e-05
										2.64	0.997709	738.985	0.0152431	738.97	0.0304862	739	4.12534e-05	4.24893e-05
										2.64	0.997709	739.985	0.0152644	739.969	0.0305287	740	4.1255e-05	4.24893e-05
										2.64	0.997709	740.985	0.0152856	740.969	0.0305712	741	4.12567e-05	4.24893e-05
										2.63	0.997656	741.985	0.0153069	741.969	0.0306138	742	4.12584e-05	4.25317e-05
										2.6	0.997488	742.985	0.0153282	742.969	0.0306563	743	4.12602e-05	4.25536e-05
										2.58	0.99737	743.985	0.0153494	743.969	0.0306989	744	4.12619e-05	4.25759e-05
										2.57	0.997308	744.985	0.0153707	744.969	0.0307415	745	4.12637e-05	4.26102e-05
										2.57	0.997308	745.985	0.0153921	745.969	0.0307841	746	4.12656e-05	4.26102e-05
										2.54	0.997116	746.985	0.0154134	746.969	0.0308268	747	4.12674e-05	4.26455e-05
										2.49	0.996764	747.985	0.0154347	747.969	0.0308694	748	4.12693e-05	4.2682e-05
										2.49	0.996764	748.985	0.0154561	748.969	0.0309121	749	4.12712e-05	4.2682e-05
										2.46	0.996533	749.985	0.0154774	749.969	0.0309548	750	4.12731e-05	4.27196e-05
										2.45	0.996452	750.985	0.0154988	750.969	0.0309976	751	4.12751e-05	4.27453e-05
										2.44	0.996369	751.984	0.0155202	751.969	0.0310404	752	4.12771e-05	4.27848e-05
										2.44	0.996369	752.984	0.0155416	752.969	0.0310832	753	4.12791e-05	4.27848e-05
										2.43	0.996285	753.984	0.015563	753.969	0.031126	754	4.12811e-05	4.28256e-05
										2.4	0.996019	754.984	0.0155844	754.969	0.0311688	755	4.12832e-05	4.28535e-05
										2.39	0.995926	755.984	0.0156059	755.969	0.0312117	756	4.12853e-05	4.28965e-05
										2.39	0.995926	756.984	0.0156273	756.969	0.0312546	757	4.12875e-05	4.28965e-05
										2.38	0.995831	757.984	0.0156488	757.969	0.0312976	758	4.12897e-05	4.29408e-05
										2.36	0.995635	758.984	0.0156703	758.969	0.0313405	759	4.12919e-05	4.29711e-05
										2.35	0.995533	759.984	0.0156918	759.969	0.0313835	760	4.12941e-05	4.30177e-05
										2.35	0.995533	760.984	0.0157133	760.969	0.0314266	761	4.12964e-05	4.30177e-05
										2.34	0.995429	761.984	0.0157348	761.969	0.0314696	762	4.12987e-05	4.30658e-05
										2.33	0.995323	762.984	0.0157564	762.968	0.0315127	763	4.13011e-05	4.30986e-05
										2.31	0.995102	763.984	0.0157779	763.968	0.0315559	764	4.13035e-05	4.31493e-05
										2.31	0.995102	764.984	0.0157995	764.968	0.031599	765	4.13059e-05	4.31493e-05
										2.3	0.994988	765.984	0.0158211	765.968	0.0316422	766	4.13084e-05	4.32015e-05
										2.28	0.994752	766.984	0.0158427	766.968	0.0316855	767	4.13109e-05	4.32372e-05
										2.26	0.994505	767.984	0.0158644	767.968	0.0317288	768	4.13135e-05	4.32922e-05
										2.26	0.994505	768.984	0.015886	768.968	0.0317721	769	4.13161e-05	4.32922e-05
										2.25	0.994377	769.984	0.0159077	769.968	0.0318154	770	4.13187e-05	4.33489e-05
										2.24	0.994246	770.984	0.0159294	770.968	0.0318588	771	4.13214e-05	4.34074e-05
										2.24	0.994246	771.984	0.0159511	771.968	0.0319022	772	4.13241e-05	4.34074e-05
										2.23	0.994112	772.984	0.0159728	772.968	0.0319457	773	4.13269e-05	4.34677e-05
										2.22	0.993974	773.984	0.0159946	773.968	0.0319892	774	4.13297e-05	4.3509e-05
										2.21	0.993834	774.984	0.0160164	774.968	0.0320328	775	4.13326e-05	4.36161e-05
										2.21	0.993834	775.984	0.0160382	775.968	0.0320763	776	4.13355e-05	4.36161e-05
										2.21	0.993834	776.984	0.01606	776.968	0.03212	777	4.13385e-05	4.36161e-05
										2.21	0.993834	777.984	0.0160818	777.968	0.0321637	778	4.13415e-05	4.36161e-05
										2.2	0.99369	778.984	0.0161037	778.968	0.0322074	779	4.13445e-05	4.37288e-05
										2.19	0.993543	779.984	0.0161256	779.968	0.0322512	780	4.13477e-05	4.37993e-05
										2.19	0.993543	780.984	0.0161475	780.968	0.032295	781	4.13508e-05	4.37993e-05
										2.18	0.993393	781.984	0.0161694	781.968	0.0323389	782	4.13541e-05	4.38968e-05
										2.18	0.993393	782.984	0.0161914	782.968	0.0323828	783	4.13573e-05	4.38968e-05
										2.17	0.993239	783.984	0.0162134	783.968	0.0324268	784	4.13607e-05	4.39985e-05
										2.17	0.993239	784.984	0.0162354	784.968	0.0324708	785	4.13641e-05	4.39985e-05
										2.16	0.993082	785.984	0.0162574	785.967	0.0325149	786	4.13675e-05	4.40775e-05
										2.15	0.992921	786.984	0.0162795	786.967	0.032559	787	4.1371e-05	4.41316e-05
										2.14	0.992756	787.984	0.0163016	787.967	0.0326032	788	4.13746e-05	4.41869e-05
										2.13	0.992587	788.984	0.0163237	788.967	0.0326474	789	4.13782e-05	4.43009e-05
										2.13	0.992587	789.984	0.0163459	789.967	0.0326917	790	4.13819e-05	4.43009e-05
										2.13	0.992587	790.984	0.016368	790.967	0.0327361	791	4.13857e-05	4.43009e-05
										2.12	0.992414	791.984	0.0163903	791.967	0.0327805	792	4.13895e-05	4.44197e-05
										2.11	0.992238	792.984	0.0164125	792.967	0.032825	793	4.13934e-05	4.45122e-05
										2.11	0.992238	793.984	0.0164348	793.967	0.0328695	794	4.13974e-05	4.45122e-05
										2.1	0.992057	794.984	0.0164571	794.967	0.0329141	795	4.14014e-05	4.46401e-05
										2.1	0.992057	795.984	0.0164794	795.967	0.0329588	796	4.14055e-05	4.46401e-05
										2.09	0.991872	796.983	0.0165018	796.967	0.0330036	797	4.14097e-05	4.48423e-05
										2.09	0.991872	797.983	0.0165242	797.967	0.0330484	798	4.1414e-05	4.48423e-05
										2.09	0.991872	798.983	0.0165466	798.967	0.0330932	799	4.14183e-05	4.48423e-05
										2.09	0.991872	799.983	0.0165691	799.967	0.0331382	800	4.14227e-05	4.48423e-05
										2.08	0.991682	800.983	0.0165916	800.967	0.0331832	801	4.14272e-05	4.50947e-05
										2.08	0.991682	801.983	0.0166142	801.967	0.0332283	802	4.14318e-05	4.50947e-05
										2.08	0.991682	802.983	0.0166367	802.967	0.0332735	803	4.14365e-05	4.50947e-05
										2.07	0.991489	803.983	0.0166594	803.967	0.0333187	804	4.14412e-05	4.52868e-05
										2.07	0.991489	804.983	0.016682	804.967	0.033364	805	4.1446e-05	4.52868e-05
										2.06	0.99129	805.983	0.0167047	805.967	0.0334095	806	4.14509e-05	4.56588e-05
										2.06	0.99129	806.983	0.0167275	806.967	0.0334549	807	4.14559e-05	4.56588e-05
										2.06	0.99129	807.983	0.0167503	807.966	0.0335005	808	4.1461e-05	4.56588e-05
										2.06	0.99129	808.983	0.0167731	808.966	0.0335462	809	4.14662e-05	4.56588e-05
										2.06	0.99129	809.983	0.016796	809.966	0.0335919	810	4.14715e-05	4.56588e-05
										2.06	0.99129	810.983	0.0168189	810.966	0.0336378	811	4.14769e-05	4.56588e-05
										2.06	0.99129	811.983	0.0168418	811.966	0.0336837	812	4.14824e-05	4.56588e-05
										2.05	0.991087	812.983	0.0168649	812.966	0.0337297	813	4.1488e-05	4.61156e-05
										2.05	0.991087	813.983	0.0168879	813.966	0.0337758	814	4.14936e-05	4.61156e-05
										2.05	0.991087	814.983	0.016911	814.966	0.033822	815	4.14994e-05	4.61156e-05
										2.04	0.99088	815.983	0.0169342	815.966	0.0338683	816	4.15053e-05	4.66231e-05
										2.04	0.99088	816.983	0.0169574	816.966	0.0339148	817	4.15113e-05	4.66231e-05
										2.04	0.99088	817.983	0.0169806	817.966	0.0339613	818	4.15175e-05	4.66231e-05
										2.04	0.99088	818.983	0.0170039	818.966	0.0340079	819	4.15237e-05	4.66231e-05
										2.04	0.99088	819.983	0.0170273	819.966	0.0340546	820	4.153e-05	4.66231e-05
										2.04	0.99088	820.983	0.0170507	820.966	0.0341015	821	4.15365e-05	4.66231e-05
										2.04	0.99088	821.983	0.0170742	821.966	0.0341484	822	4.15431e-05	4.66231e-05
										2.03	0.990667	822.983	0.0170977	822.966	0.0341955	823	4.15498e-05	4.73679e-05
										2.03	0.990667	823.983	0.0171213	823.966	0.0342427	824	4.15567e-05	4.73679e-05
										2.03	0.990667	824.983	0.017145	824.966	0.03429	825	4.15636e-05	4.73679e-05
										2.03	0.990667	825.983	0.0171687	825.966	0.0343374	826	4.15707e-05	4.73679e-05
										2.03	0.990667	826.983	0.0171925	826.966	0.034385	827	4.1578e-05	4.73679e-05
										2.03	0.990667	827.983	0.0172163	827.966	0.0344327	828	4.15853e-05	4.73679e-05
										2.02	0.99045	828.983	0.0172402	828.966	0.0344805	829	4.15928e-05	4.8222e-05
										2.02	0.99045	829.983	0.0172642	829.965	0.0345284	830	4.16005e-05	4.8222e-05
										2.02	0.99045	830.983	0.0172883	830.965	0.0345765	831	4.16083e-05	4.8222e-05
										2.02	0.99045	831.983	0.0173124	831.965	0.0346247	832	4.16163e-05	4.8222e-05
										2.02	0.99045	832.983	0.0173365	832.965	0.0346731	833	4.16244e-05	4.8222e-05
										2.02	0.99045	833.983	0.0173608	833.965	0.0347216	834	4.16326e-05	4.8222e-05
										2.02	0.99045	834.983	0.0173851	834.965	0.0347703	835	4.1641e-05	4.8222e-05
										2.01	0.990228	835.983	0.0174095	835.965	0.0348191	836	4.16496e-05	5.08985e-05
										2.01	0.990228	836.983	0.017434	836.965	0.034868	837	4.16583e-05	5.08985e-05
										2.01	0.990228	837.983	0.0174586	837.965	0.0349171	838	4.16672e-05	5.08985e-05
										2.01	0.990228	838.983	0.0174832	838.965	0.0349664	839	4.16763e-05	5.08985e-05
										2.01	0.990228	839.982	0.0175079	839.965	0.0350159	840	4.16856e-05	5.08985e-05
										2.01	0.990228	840.982	0.0175327	840.965	0.0350655	841	4.1695e-05	5.08985e-05
										2.01	0.990228	841.982	0.0175576	841.965	0.0351153	842	4.17046e-05	5.08985e-05
										2.01	0.990228	842.982	0.0175826	842.965	0.0351652	843	4.17144e-05	5.08985e-05
										2.01	0.990228	843.982	0.0176077	843.965	0.0352154	844	4.17244e-05	5.08985e-05
										2.01	0.990228	844.982	0.0176329	844.965	0.0352657	845	4.17346e-05	5.08985e-05
										2.01	0.990228	845.982	0.0176581	845.965	0.0353162	846	4.17449e-05	5.08985e-05
										2.01	0.990228	846.982	0.0176835	846.965	0.0353669	847	4.17555e-05	5.08985e-05
										2.01	0.990228	847.982	0.0177089	847.965	0.0354178	848	4.17663e-05	5.08985e-05
										2.01	0.990228	848.982	0.0177345	848.965	0.0354689	849	4.17773e-05	5.08985e-05
										2.01	0.990228	849.982	0.0177601	849.964	0.0355202	850	4.17885e-05	5.08985e-05
										2.01	0.990228	850.982	0.0177859	850.964	0.0355717	851	4.17999e-05	5.08985e-05
										2.01	0.990228	851.982	0.0178117	851.964	0.0356235	852	4.18116e-05	5.08985e-05
										2.01	0.990228	852.982	0.0178377	852.964	0.0356754	853	4.18234e-05	5.08985e-05
										2.01	0.990228	853.982	0.0178638	853.964	0.0357276	854	4.18355e-05	5.08985e-05
										2.01	0.990228	854.982	0.01789	854.964	0.0357799	855	4.18479e-05	5.08985e-05
										2.01	0.990228	855.982	0.0179163	855.964	0.0358326	856	4.18605e-05	5.08985e-05
										2.01	0.990228	856.982	0.0179427	856.964	0.0358854	857	4.18733e-05	5.08985e-05
										2.01	0.990228	857.982	0.0179693	857.964	0.0359385	858	4.18864e-05	5.08985e-05
										2.01	0.990228	858.982	0.0179959	858.964	0.0359918	859	4.18997e-05	5.08985e-05
										2.01	0.990228	859.982	0.0180227	859.964	0.0360454	860	4.19133e-05	5.08985e-05
										2	0.99	860.982	0.0180496	860.964	0.0360993	861	4.19272e-05	0.000295622
										2	0.99	861.982	0.0180767	861.964	0.0361534	862	4.19413e-05	0.000295622
										2	0.99	862.982	0.0181039	862.964	0.0362078	863	4.19557e-05	0.000295622
										2	0.99	863.982	0.0181312	863.964	0.0362624	864	4.19704e-05	0.000295622
										2	0.99	864.982	0.0181587	864.964	0.0363174	865	4.19854e-05	0.000295622
										2	0.99	865.982	0.0181863	865.964	0.0363726	866	4.20007e-05	0.000295622
										2	0.99	866.982	0.018214	866.964	0.0364281	867	4.20162e-05	0.000295622
										2	0.99	867.982	0.0182419	867.964	0.0364839	868	4.20321e-05	0.000295622
										2	0.99	868.982	0.01827	868.963	0.03654	869	4.20483e-05	0.000295622
										2	0.99	869.982	0.0182982	869.963	0.0365964	870	4.20649e-05	0.000295622
										2	0.99	870.982	0.0183266	870.963	0.0366532	871	4.20817e-05	0.000295622
										2	0.99	871.982	0.0183551	871.963	0.0367102	872	4.20989e-05	0.000295622
										2	0.99	872.982	0.0183838	872.963	0.0367676	873	4.21164e-05	0.000295622
										2	0.99	873.982	0.0184127	873.963	0.0368254	874	4.21343e-05	0.000295622
										2	0.99	874.982	0.0184417	874.963	0.0368834	875	4.21525e-05	0.000295622
										2	0.99	875.982	0.0184709	875.963	0.0369419	876	4.21711e-05	0.000295622
										2	0.99	876.981	0.0185003	876.963	0.0370007	877	4.219e-05	0.000295622
										2	0.99	877.981	0.0185299	877.963	0.0370598	878	4.22094e-05	0.000295622
										2	0.99	878.981	0.0185597	878.963	0.0371193	879	4.22291e-05	0.000295622
										2	0.99	879.981	0.0185896	879.963	0.0371793	880	4.22492e-05	0.000295622
										2	0.99	880.981	0.0186198	880.963	0.0372396	881	4.22697e-05	0.000295622
										2	0.99	881.981	0.0186501	881.963	0.0373003	882	4.22906e-05	0.000295622
										2	0.99	882.981	0.0186807	882.963	0.0373614	883	4.23119e-05	0.000295622
										2	0.99	883.981	0.0187115	883.963	0.0374229	884	4.23336e-05	0.000295622
										2	0.99	884.981	0.0187425	884.963	0.0374849	885	4.23558e-05	0.000295622
										2	0.99	885.981	0.0187737	885.962	0.0375473	886	4.23785e-05	0.000295622
										2	0.99	886.981	0.0188051	886.962	0.0376102	887	4.24015e-05	0.000295622
										2	0.99	887.981	0.0188367	887.962	0.0376735	888	4.24251e-05	0.000295622
										2	0.99	888.981	0.0188686	888.962	0.0377372	889	4.24491e-05	0.000295622
										2	0.99	889.981	0.0189007	889.962	0.0378015	890	4.24736e-05	0.000295622
										2	0.99	890.981	0.0189331	890.962	0.0378662	891	4.24985e-05	0.000295622
										2	0.99	891.981	0.0189657	891.962	0.0379314	892	4.2524e-05	0.000295622
										2	0.99	892.981	0.0189986	892.962	0.0379971	893	4.255e-05	0.000295622
										2	0.99	893.981	0.0190317	893.962	0.0380634	894	4.25765e-05	0.000295622
										2	0.99	894.981	0.0190651	894.962	0.0381302	895	4.26035e-05	0.000295622
										2	0.99	895.981	0.0190987	895.962	0.0381975	896	4.26311e-05	0.000295622
										2	0.99	896.981	0.0191327	896.962	0.0382653	897	4.26592e-05	0.000295622
										2	0.99	897.981	0.0191669	897.962	0.0383338	898	4.26879e-05	0.000295622
										2	0.99	898.981	0.0192014	898.962	0.0384028	899	4.27172e-05	0.000295622
										2	0.99	899.981	0.0192362	899.962	0.0384723	900	4.2747e-05	0.000295622
										2	0.99	900.981	0.0192713	900.961	0.0385425	901	4.27775e-05	0.000295622
										2	0.99	901.981	0.0193067	901.961	0.0386133	902	4.28086e-05	0.000295622
										2	0.99	902.981	0.0193424	902.961	0.0386847	903	4.28402e-05	0.000295622
										2	0.99	903.981	0.0193784	903.961	0.0387568	904	4.28726e-05	0.000295622
										2	0.99	904.981	0.0194148	904.961	0.0388295	905	4.29055e-05	0.000295622
										2	0.99	905.981	0.0194514	905.961	0.0389029	906	4.29392e-05	0.000295622
										2	0.99	906.981	0.0194885	906.961	0.0389769	907	4.29735e-05	0.000295622
										2	0.99	907.98	0.0195259	907.961	0.0390517	908	4.30085e-05	0.000295622
										2	0.99	908.98	0.0195636	908.961	0.0391272	909	4.30442e-05	0.000295622
										2	0.99	909.98	0.0196017	909.961	0.0392034	910	4.30806e-05	0.000295622
										2	0.99	910.98	0.0196401	910.961	0.0392803	911	4.31178e-05	0.000295622
										2	0.99	911.98	0.019679	911.961	0.039358	912	4.31557e-05	0.000295622
										2	0.99	912.98	0.0197182	912.961	0.0394364	913	4.31943e-05	0.000295622
										2	0.99	913.98	0.0197578	913.96	0.0395157	914	4.32338e-05	0.000295622
										2	0.99	914.98	0.0197979	914.96	0.0395957	915	4.3274e-05	0.000295622
										2	0.99	915.98	0.0198383	915.96	0.0396766	916	4.33151e-05	0.000295622
										2	0.99	916.98	0.0198792	916.96	0.0397584	917	4.3357e-05	0.000295622
										2	0.99	917.98	0.0199205	917.96	0.0398409	918	4.33997e-05	0.000295622
										2	0.99	918.98	0.0199622	918.96	0.0399244	919	4.34433e-05	0.000295622
										2	0.99	919.98	0.0200044	919.96	0.0400088	920	4.34878e-05	0.000295622
										2	0.99	920.98	0.020047	920.96	0.040094	921	4.35331e-05	0.000295622
										2	0.99	921.98	0.0200901	921.96	0.0401802	922	4.35794e-05	0.000295622
										2	0.99	922.98	0.0201337	922.96	0.0402674	923	4.36266e-05	0.000295622
										2	0.99	923.98	0.0201778	923.96	0.0403555	924	4.36748e-05	0.000295622
										2	0.99	924.98	0.0202223	924.96	0.0404447	925	4.3724e-05	0.000295622
										2	0.99	925.98	0.0202674	925.959	0.0405348	926	4.37741e-05	0.000295622
										2	0.99	926.98	0.020313	926.959	0.040626	927	4.38253e-05	0.000295622
										2	0.99	927.98	0.0203591	927.959	0.0407183	928	4.38775e-05	0.000295622
										2	0.99	928.98	0.0204058	928.959	0.0408116	929	4.39307e-05	0.000295622
										2	0.99	929.98	0.020453	929.959	0.0409061	930	4.3985e-05	0.000295622
										2	0.99	930.979	0.0205008	930.959	0.0410017	931	4.40405e-05	0.000295622
										2	0.99	931.979	0.0205492	931.959	0.0410984	932	4.4097e-05	0.000295622
										2	0.99	932.979	0.0205982	932.959	0.0411963	933	4.41547e-05	0.000295622
										2	0.99	933.979	0.0206477	933.959	0.0412955	934	4.42136e-05	0.000295622
										2	0.99	934.979	0.0206979	934.959	0.0413958	935	4.42736e-05	0.000295622
										2	0.99	935.979	0.0207487	935.959	0.0414975	936	4.43349e-05	0.000295622
										2	0.99	936.979	0.0208002	936.958	0.0416004	937	4.43974e-05	0.000295622
										2	0.99	937.979	0.0208523	937.958	0.0417046	938	4.44612e-05	0.000295622
										2	0.99	938.979	0.0209051	938.958	0.0418102	939	4.45263e-05	0.000295622
										2	0.99	939.979	0.0209586	939.958	0.0419171	940	4.45927e-05	0.000295622
										2	0.99	940.979	0.0210127	940.958	0.0420254	941	4.46604e-05	0.000295622
										2	0.99	941.979	0.0210676	941.958	0.0421352	942	4.47295e-05	0.000295622
										2	0.99	942.979	0.0211232	942.958	0.0422464	943	4.48e-05	0.000295622
										2	0.99	943.979	0.0211796	943.958	0.0423592	944	4.4872e-05	0.000295622
										2	0.99	944.979	0.0212367	944.958	0.0424734	945	4.49454e-05	0.000295622
										2	0.99	945.979	0.0212946	945.957	0.0425892	946	4.50203e-05	0.000295622
										2	0.99	946.979	0.0213533	946.957	0.0427066	947	4.50967e-05	0.000295622
										2	0.99	947.979	0.0214128	947.957	0.0428256	948	4.51747e-05	0.000295622
										2	0.99	948.979	0.0214732	948.957	0.0429463	949	4.52543e-05	0.000295622
										2	0.99	949.978	0.0215343	949.957	0.0430687	950	4.53355e-05	0.000295622
										2	0.99	950.978	0.0215964	950.957	0.0431928	951	4.54183e-05	0.000295622
										2	0.99	951.978	0.0216593	951.957	0.0433187	952	4.55028e-05	0.000295622
										2	0.99	952.978	0.0217232	952.957	0.0434463	953	4.5589e-05	0.000295622
										2	0.99	953.978	0.0217879	953.956	0.0435759	954	4.5677e-05	0.000295622
										2	0.99	954.978	0.0218536	954.956	0.0437073	955	4.57668e-05	0.000295622
										2	0.99	955.978	0.0219203	955.956	0.0438406	956	4.58584e-05	0.000295622
										2	0.99	956.978	0.021988	956.956	0.0439759	957	4.59519e-05	0.000295622
										2	0.99	957.978	0.0220566	957.956	0.0441132	958	4.60472e-05	0.000295622
										2	0.99	958.978	0.0221263	958.956	0.0442526	959	4.61445e-05	0.000295622
										2	0.99	959.978	0.022197	959.956	0.0443941	960	4.62438e-05	0.000295622
										2	0.99	960.978	0.0222688	960.955	0.0445377	961	4.63451e-05	0.000295622
										2	0.99	961.978	0.0223417	961.955	0.0446835	962	4.64485e-05	0.000295622
										2	0.99	962.978	0.0224157	962.955	0.0448315	963	4.6554e-05	0.000295622
										2	0.99	963.978	0.0224909	963.955	0.0449818	964	4.66616e-05	0.000295622
										2	0.99	964.977	0.0225672	964.955	0.0451344	965	4.67714e-05	0.000295622
										2	0.99	965.977	0.0226447	965.955	0.0452894	966	4.68835e-05	0.000295622
										2	0.99	966.977	0.0227234	966.955	0.0454469	967	4.69978e-05	0.000295622
										2	0.99	967.977	0.0228034	967.954	0.0456068	968	4.71145e-05	0.000295622
										2	0.99	968.977	0.0228846	968.954	0.0457693	969	4.72335e-05	0.000295622
										2	0.99	969.977	0.0229672	969.954	0.0459344	970	4.7355e-05	0.000295622
										2	0.99	970.977	0.023051	970.954	0.0461021	971	4.7479e-05	0.000295622
										2	0.99	971.977	0.0231362	971.954	0.0462725	972	4.76054e-05	0.000295622
										2	0.99	972.977	0.0232228	972.954	0.0464457	973	4.77345e-05	0.000295622
										2	0.99	973.977	0.0233108	973.953	0.0466217	974	4.78662e-05	0.000295622
										2	0.99	974.977	0.0234003	974.953	0.0468005	975	4.80005e-05	0.000295622
										2	0.99	975.977	0.0234912	975.953	0.0469824	976	4.81377e-05	0.000295622
										2	0.99	976.976	0.0235836	976.953	0.0471672	977	4.82776e-05	0.000295622
										2	0.99	977.976	0.0236775	977.953	0.0473551	978	4.84203e-05	0.000295622
										2	0.99	978.976	0.0237731	978.952	0.0475461	979	4.8566e-05	0.000295622
										2	0.99	979.976	0.0238702	979.952	0.0477404	980	4.87147e-05	0.000295622
										2	0.99	980.976	0.0239689	980.952	0.0479379	981	4.88664e-05	0.000295622
										2	0.99	981.976	0.0240694	981.952	0.0481388	982	4.90211e-05	0.000295622
										2	0.99	982.976	0.0241715	982.952	0.048343	983	4.91791e-05	0.000295622
										2	0.99	983.976	0.0242754	983.951	0.0485508	984	4.93403e-05	0.000295622
										2	0.99	984.976	0.0243811	984.951	0.0487621	985	4.95047e-05	0.000295622
										2	0.99	985.976	0.0244886	985.951	0.0489771	986	4.96725e-05	0.000295622
										2	0.99	986.975	0.0245979	986.951	0.0491958	987	4.98438e-05	0.000295622
										2	0.99	987.975	0.0247091	987.951	0.0494183	988	5.00185e-05	0.000295622
										2	0.99	988.975	0.0248223	988.95	0.0496447	989	5.01968e-05	0.000295622
										2	0.99	989.975	0.0249375	989.95	0.049875	990	5.03788e-05	0.000295622
										2	0.99	990.975	0.0250547	990.95	0.0501094	991	5.05644e-05	0.000295622
										2	0.99	991.975	0.0251739	991.95	0.0503479	992	5.07539e-05	0.000295622
										2	0.99	992.975	0.0252953	992.949	0.0505906	993	5.09473e-05	0.000295622
										2	0.99	993.975	0.0254188	993.949	0.0508377	994	5.11445e-05	0.000295622
										2	0.99	994.974	0.0255446	994.949	0.0510891	995	5.13459e-05	0.000295622
										2	0.99	995.974	0.0256725	995.949	0.0513451	996	5.15513e-05	0.000295622
										2	0.99	996.974	0.0258028	996.948	0.0516056	997	5.17609e-05	0.000295622
										2	0.99	997.974	0.0259355	997.948	0.0518709	998	5.19749e-05	0.000295622
										2	0.99	998.974	0.0260705	998.948	0.052141	999	5.21931e-05	0.000295622
										2	0.99	999.974	0.026208	999.948	0.0524159	1000	5.24159e-05	0.000295622
										2	0.99	1000.97	0.0263479	1000.95	0.0526959	1001	5.26432e-05	0.000295622
										2	0.99	1001.97	0.0264905	1001.95	0.0529809	1002	5.28752e-05	0.000295622
										2	0.99	1002.97	0.0266356	1002.95	0.0532712	1003	5.31119e-05	0.000295622
										2	0.99	1003.97	0.0267834	1003.95	0.0535669	1004	5.33534e-05	0.000295622
										2	0.99	1004.97	0.026934	1004.95	0.0538679	1005	5.35999e-05	0.000295622
										2	0.99	1005.97	0.0270873	1005.95	0.0541746	1006	5.38515e-05	0.000295622
										2	0.99	1006.97	0.0272434	1006.95	0.0544869	1007	5.41081e-05	0.000295622
										2	0.99	1007.97	0.0274025	1007.95	0.054805	1008	5.43701e-05	0.000295622
										2	0.99	1008.97	0.0275645	1008.94	0.0551291	1009	5.46374e-05	0.000295622
										2	0.99	1009.97	0.0277296	1009.94	0.0554592	1010	5.49101e-05	0.000295622
										2	0.99	1010.97	0.0278978	1010.94	0.0557955	1011	5.51885e-05	0.000295622
										2	0.99	1011.97	0.0280691	1011.94	0.0561382	1012	5.54725e-05	0.000295622
										2	0.99	1012.97	0.0282436	1012.94	0.0564873	1013	5.57624e-05	0.000295622
										2	0.99	1013.97	0.0284215	1013.94	0.056843	1014	5.60581e-05	0.000295622
										2	0.99	1014.97	0.0286027	1014.94	0.0572054	1015	5.636e-05	0.000295622
										2	0.99	1015.97	0.0287873	1015.94	0.0575747	1016	5.6668e-05	0.000295622
										2	0.99	1016.97	0.0289755	1016.94	0.057951	1017	5.69823e-05	0.000295622
										2	0.99	1017.97	0.0291673	1017.94	0.0583346	1018	5.73031e-05	0.000295622
										2	0.99	1018.97	0.0293627	1018.94	0.0587254	1019	5.76304e-05	0.000295622
										2	0.99	1019.97	0.0295619	1019.94	0.0591238	1020	5.79645e-05	0.000295622
										2	0.99	1020.97	0.0297649	1020.94	0.0595298	1021	5.83053e-05	0.000295622
										2	0.99	1021.97	0.0299718	1021.94	0.0599436	1022	5.86532e-05	0.000295622
										2	0.99	1022.97	0.0301827	1022.94	0.0603654	1023	5.90082e-05	0.000295622
										2	0.99	1023.97	0.0303977	1023.94	0.0607953	1024	5.93704e-05	0.000295622
										2	0.99	1024.97	0.0306168	1024.94	0.0612336	1025	5.97401e-05	0.000295622
										2	0.99	1025.97	0.0308402	1025.94	0.0616804	1026	6.01174e-05	0.000295622
										2	0.99	1026.97	0.031068	1026.94	0.0621359	1027	6.05023e-05	0.000295622
										2	0.99	1027.97	0.0313001	1027.94	0.0626003	1028	6.08952e-05	0.000295622
										2	0.99	1028.97	0.0315369	1028.94	0.0630737	1029	6.12961e-05	0.000295622
										2	0.99	1029.97	0.0317782	1029.94	0.0635564	1030	6.17053e-05	0.000295622
										2	0.99	1030.97	0.0320243	1030.94	0.0640486	1031	6.21228e-05	0.000295622
										2	0.99	1031.97	0.0322752	1031.94	0.0645504	1032	6.25488e-05	0.000295622
										2	0.99	1032.97	0.032531	1032.93	0.0650621	1033	6.29836e-05	0.000295622
										2	0.99	1033.97	0.0327919	1033.93	0.0655839	1034	6.34274e-05	0.000295622
										2	0.99	1034.97	0.033058	1034.93	0.066116	1035	6.38802e-05	0.000295622
										2	0.99	1035.97	0.0333293	1035.93	0.0666586	1036	6.43423e-05	0.000295622
										2	0.99	1036.97	0.033606	1036.93	0.0672119	1037	6.48138e-05	0.000295622
										2	0.99	1037.97	0.0338881	1037.93	0.0677763	1038	6.5295e-05	0.000295622
										2	0.99	1038.97	0.0341759	1038.93	0.0683518	1039	6.57861e-05	0.000295622
										2	0.99	1039.97	0.0344694	1039.93	0.0689388	1040	6.62873e-05	0.000295622
										2	0.99	1040.97	0.0347687	1040.93	0.0695375	1041	6.67987e-05	0.000295622
										2	0.99	1041.96	0.0350741	1041.93	0.0701481	1042	6.73207e-05	0.000295622
										2	0.99	1042.96	0.0353855	1042.93	0.070771	1043	6.78533e-05	0.000295622
										2	0.99	1043.96	0.0357032	1043.93	0.0714063	1044	6.83968e-05	0.000295622
										2	0.99	1044.96	0.0360272	1044.93	0.0720544	1045	6.89515e-05	0.000295622
										2	0.99	1045.96	0.0363577	1045.93	0.0727154	1046	6.95176e-05	0.000295622
										2	0.99	1046.96	0.0366949	1046.93	0.0733898	1047	7.00953e-05	0.000295622
										2	0.99	1047.96	0.0370388	1047.93	0.0740777	1048	7.06848e-05	0.000295622
										2	0.99	1048.96	0.0373897	1048.93	0.0747795	1049	7.12864e-05	0.000295622
										2	0.99	1049.96	0.0377477	1049.92	0.0754954	1050	7.19004e-05	0.000295622
										2	0.99	1050.96	0.0381129	1050.92	0.0762258	1051	7.25269e-05	0.000295622
										2	0.99	1051.96	0.0384855	1051.92	0.076971	1052	7.31663e-05	0.000295622
										2	0.99	1052.96	0.0388656	1052.92	0.0777313	1053	7.38189e-05	0.000295622
										2	0.99	1053.96	0.0392535	1053.92	0.078507	1054	7.44848e-05	0.000295622
										2	0.99	1054.96	0.0396492	1054.92	0.0792984	1055	7.51643e-05	0.000295622
										2	0.99	1055.96	0.0400529	1055.92	0.0801059	1056	7.58579e-05	0.000295622
										2	0.99	1056.96	0.0404649	1056.92	0.0809298	1057	7.65656e-05	0.000295622
										2	0.99	1057.96	0.0408853	1057.92	0.0817706	1058	7.72879e-05	0.000295622
										2	0.99	1058.96	0.0413142	1058.92	0.0826284	1059	7.80249e-05	0.000295622
										2	0.99	1059.96	0.0417519	1059.92	0.0835038	1060	7.87771e-05	0.000295622
										2	0.99	1060.96	0.0421985	1060.92	0.084397	1061	7.95448e-05	0.000295622
										2	0.99	1061.96	0.0426543	1061.91	0.0853085	1062	8.03282e-05	0.000295622
										2	0.99	1062.96	0.0431193	1062.91	0.0862387	1063	8.11276e-05	0.000295622
										2	0.99	1063.96	0.0435939	1063.91	0.0871879	1064	8.19435e-05	0.000295622
										2	0.99	1064.96	0.0440783	1064.91	0.0881566	1065	8.27761e-05	0.000295622
										2	0.99	1065.96	0.0445726	1065.91	0.0891451	1066	8.36258e-05	0.000295622
										2	0.99	1066.95	0.045077	1066.91	0.090154	1067	8.4493e-05	0.000295622
										2	0.99	1067.95	0.0455918	1067.91	0.0911836	1068	8.53779e-05	0.000295622
										2	0.99	1068.95	0.0461172	1068.91	0.0922344	1069	8.6281e-05	0.000295622
										2	0.99	1069.95	0.0466534	1069.91	0.0933068	1070	8.72027e-05	0.000295622
										2	0.99	1070.95	0.0472007	1070.91	0.0944014	1071	8.81432e-05	0.000295622
										2	0.99	1071.95	0.0477592	1071.9	0.0955185	1072	8.91031e-05	0.000295622
										2	0.99	1072.95	0.0483293	1072.9	0.0966587	1073	9.00826e-05	0.000295622
										2	0.99	1073.95	0.0489112	1073.9	0.0978224	1074	9.10823e-05	0.000295622
										2	0.99	1074.95	0.0495051	1074.9	0.0990102	1075	9.21025e-05	0.000295622
										2	0.99	1075.95	0.0501113	1075.9	0.100223	1076	9.31437e-05	0.000295622
										2	0.99	1076.95	0.05073	1076.9	0.10146	1077	9.42062e-05	0.000295622
										2	0.99	1077.95	0.0513616	1077.9	0.102723	1078	9.52905e-05	0.000295622
										2	0.99	1078.95	0.0520062	1078.9	0.104012	1079	9.63971e-05	0.000295622
										2	0.99	1079.95	0.0526642	1079.89	0.105328	1080	9.75264e-05	0.000295622
										2	0.99	1080.95	0.0533359	1080.89	0.106672	1081	9.86789e-05	0.000295622
										2	0.99	1081.95	0.0540216	1081.89	0.108043	1082	9.9855e-05	0.000295622
										2	0.99	1082.95	0.0547214	1082.89	0.109443	1083	0.000101055	0.000295622
										2	0.99	1083.94	0.0554359	1083.89	0.110872	1084	0.00010228	0.000295622
										2	0.99	1084.94	0.0561652	1084.89	0.11233	1085	0.00010353	0.000295622
										2	0.99	1085.94	0.0569097	1085.89	0.113819	1086	0.000104806	0.000295622
										2	0.99	1086.94	0.0576697	1086.88	0.115339	1087	0.000106108	0.000295622
										2	0.99	1087.94	0.0584456	1087.88	0.116891	1088	0.000107437	0.000295622
										2	0.99	1088.94	0.0592376	1088.88	0.118475	1089	0.000108793	0.000295622
										2	0.99	1089.94	0.0600462	1089.88	0.120092	1090	0.000110176	0.000295622
										2	0.99	1090.94	0.0608716	1090.88	0.121743	1091	0.000111589	0.000295622
										2	0.99	1091.94	0.0617143	1091.88	0.123429	1092	0.00011303	0.000295622
										2	0.99	1092.94	0.0625746	1092.87	0.125149	1093	0.000114501	0.000295622
										2	0.99	1093.94	0.0634529	1093.87	0.126906	1094	0.000116002	0.000295622
										2	0.99	1094.94	0.0643496	1094.87	0.128699	1095	0.000117533	0.000295622
										2	0.99	1095.93	0.065265	1095.87	0.13053	1096	0.000119097	0.000295622
										2	0.99	1096.93	0.0661996	1096.87	0.132399	1097	0.000120692	0.000295622
										2	0.99	1097.93	0.0671538	1097.87	0.134308	1098	0.00012232	0.000295622
										2	0.99	1098.93	0.068128	1098.86	0.136256	1099	0.000123982	0.000295622
										2	0.99	1099.93	0.0691226	1099.86	0.138245	1100	0.000125677	0.000295622
										2	0.99	1100.93	0.0701381	1100.86	0.140276	1101	0.000127408	0.000295622
										2	0.99	1101.93	0.0711749	1101.86	0.14235	1102	0.000129174	0.000295622
										2	0.99	1102.93	0.0722334	1102.86	0.144467	1103	0.000130976	0.000295622
										2	0.99	1103.93	0.0733142	1103.85	0.146628	1104	0.000132816	0.000295622
										2	0.99	1104.93	0.0744177	1104.85	0.148835	1105	0.000134693	0.000295622
										2	0.99	1105.92	0.0755444	1105.85	0.151089	1106	0.000136608	0.000295622
										2	0.99	1106.92	0.0766947	1106.85	0.153389	1107	0.000138563	0.000295622
										2	0.99	1107.92	0.0778693	1107.84	0.155739	1108	0.000140558	0.000295622
										2	0.99	1108.92	0.0790685	1108.84	0.158137	1109	0.000142594	0.000295622
										2	0.99	1109.92	0.080293	1109.84	0.160586	1110	0.000144672	0.000295622
										2	0.99	1110.92	0.0815433	1110.84	0.163087	1111	0.000146793	0.000295622
										2	0.99	1111.92	0.0828199	1111.83	0.16564	1112	0.000148957	0.000295622
										2	0.99	1112.92	0.0841234	1112.83	0.168247	1113	0.000151165	0.000295622
										2	0.99	1113.91	0.0854543	1113.83	0.170909	1114	0.000153419	0.000295622
										2	0.99	1114.91	0.0868133	1114.83	0.173627	1115	0.000155719	0.000295622
										2	0.99	1115.91	0.088201	1115.82	0.176402	1116	0.000158066	0.000295622
										2	0.99	1116.91	0.0896179	1116.82	0.179236	1117	0.000160462	0.000295622
										2	0.99	1117.91	0.0910647	1117.82	0.182129	1118	0.000162906	0.000295622
										2	0.99	1118.91	0.092542	1118.81	0.185084	1119	0.000165401	0.000295622
										2	0.99	1119.91	0.0940504	1119.81	0.188101	1120	0.000167947	0.000295622
										2	0.99	1120.9	0.0955908	1120.81	0.191182	1121	0.000170546	0.000295622
										2	0.99	1121.9	0.0971636	1121.81	0.194327	1122	0.000173197	0.000295622
										2	0.99	1122.9	0.0987696	1122.8	0.197539	1123	0.000175903	0.000295622
										2	0.99	1123.9	0.10041	1123.8	0.200819	1124	0.000178665	0.000295622
										2	0.99	1124.9	0.102084	1124.8	0.204168	1125	0.000181483	0.000295622
										2	0.99	1125.9	0.103794	1125.79	0.207588	1126	0.000184359	0.000295622
										2	0.99	1126.89	0.10554	1126.79	0.211081	1127	0.000187294	0.000295622
										2	0.99	1127.89	0.107323	1127.79	0.214647	1128	0.00019029	0.000295622
										2	0.99	1128.89	0.109144	1128.78	0.218288	1129	0.000193346	0.000295622
										2	0.99	1129.89	0.111003	1129.78	0.222007	1130	0.000196466	0.000295622
										2	0.99	1130.89	0.112902	1130.77	0.225804	1131	0.00019965	0.000295622
										2	0.99	1131.89	0.114841	1131.77	0.229681	1132	0.000202898	0.000295622
										2	0.99	1132.88	0.11682	1132.77	0.23364	1133	0.000206214	0.000295622
										2	0.99	1133.88	0.118842	1133.76	0.237684	1134	0.000209598	0.000295622
										2	0.99	1134.88	0.120906	1134.76	0.241812	1135	0.00021305	0.000295622
										2	0.99	1135.88	0.123014	1135.75	0.246028	1136	0.000216574	0.000295622
										2	0.99	1136.87	0.125167	1136.75	0.250334	1137	0.00022017	0.000295622
										2	0.99	1137.87	0.127365	1137.75	0.25473	1138	0.00022384	0.000295622
										2	0.99	1138.87	0.12961	1138.74	0.25922	1139	0.000227585	0.000295622
										2	0.99	1139.87	0.131902	1139.74	0.263804	1140	0.000231407	0.000295622
										2	0.99	1140.87	0.134243	1140.73	0.268486	1141	0.000235307	0.000295622
										2	0.99	1141.86	0.136633	1141.73	0.273266	1142	0.000239288	0.000295622
										2	0.99	1142.86	0.139074	1142.72	0.278148	1143	0.000243349	0.000295622
										2	0.99	1143.86	0.141567	1143.72	0.283134	1144	0.000247494	0.000295622
										2	0.99	1144.86	0.144112	1144.71	0.288225	1145	0.000251724	0.000295622
										2	0.99	1145.85	0.146712	1145.71	0.293423	1146	0.000256041	0.000295622
										2	0.99	1146.85	0.149366	1146.7	0.298732	1147	0.000260447	0.000295622
										1.92	0.987977	1147.85	0.152077	1147.7	0.304153	1148	0.000264942	0.00542121
										1.89	0.987118	1148.85	0.154845	1148.69	0.30969	1149	0.00026953	0.00565333
										1.89	0.987118	1149.84	0.157672	1149.68	0.315343	1150	0.000274211	0.00565333
										1.89	0.987118	1150.84	0.160558	1150.68	0.321116	1151	0.000278989	0.00565333
										1.85	0.985875	1151.84	0.163506	1151.67	0.327012	1152	0.000283864	0.00595752
										1.85	0.985875	1152.83	0.166516	1152.67	0.333032	1153	0.00028884	0.00595752
										1.82	0.984864	1153.83	0.16959	1153.66	0.33918	1154	0.000293917	0.00634425
										1.82	0.984864	1154.83	0.172729	1154.65	0.345458	1155	0.000299098	0.00634425
										1.82	0.984864	1155.82	0.175935	1155.65	0.35187	1156	0.000304385	0.00634425
										1.82	0.984864	1156.82	0.179208	1156.64	0.358417	1157	0.000309781	0.00634425
										1.81	0.984512	1157.82	0.182551	1157.63	0.365102	1158	0.000315287	0.00668563
										1.8	0.984151	1158.81	0.185965	1158.63	0.37193	1159	0.000320906	0.00704538
										1.8	0.984151	1159.81	0.189451	1159.62	0.378902	1160	0.000326639	0.00704538
										1.8	0.984151	1160.81	0.193011	1160.61	0.386022	1161	0.000332491	0.00704538
										1.8	0.984151	1161.8	0.196646	1161.61	0.393292	1162	0.000338461	0.00704538
										1.77	0.983018	1162.8	0.200358	1162.6	0.400717	1163	0.000344554	0.00766159
										1.77	0.983018	1163.8	0.204149	1163.59	0.408299	1164	0.000350772	0.00766159
										1.77	0.983018	1164.79	0.20802	1164.58	0.416041	1165	0.000357117	0.00766159
										1.77	0.983018	1165.79	0.211974	1165.58	0.423947	1166	0.000363591	0.00766159
										1.75	0.982217	1166.78	0.216011	1166.57	0.432021	1167	0.000370198	0.00815878
										1.75	0.982217	1167.78	0.220133	1167.56	0.440266	1168	0.00037694	0.00815878
										1.74	0.981803	1168.78	0.224343	1168.55	0.448686	1169	0.00038382	0.0084193
										1.72	0.980945	1169.77	0.228642	1169.54	0.457283	1170	0.00039084	0.00868811
										1.72	0.980945	1170.77	0.233032	1170.53	0.466063	1171	0.000398004	0.00868811
										1.7	0.980047	1171.76	0.237514	1171.52	0.475029	1172	0.000405315	0.00896547
										1.68	0.979107	1172.76	0.242092	1172.52	0.484184	1173	0.000412774	0.00915525
										1.66	0.978122	1173.75	0.246767	1173.51	0.493533	1174	0.000420386	0.00954688
										1.66	0.978122	1174.75	0.25154	1174.5	0.50308	1175	0.000428154	0.00954688
										1.66	0.978122	1175.74	0.256415	1175.49	0.512829	1176	0.000436079	0.00954688
										1.64	0.977091	1176.74	0.261392	1176.48	0.522785	1177	0.000444167	0.0101658
										1.64	0.977091	1177.73	0.266475	1177.47	0.532951	1178	0.00045242	0.0101658
										1.64	0.977091	1178.73	0.271666	1178.46	0.543332	1179	0.000460841	0.0101658
										1.62	0.976012	1179.72	0.276966	1179.45	0.553932	1180	0.000469434	0.0106004
										1.61	0.975453	1180.72	0.282379	1180.44	0.564757	1181	0.000478202	0.0108245
										1.6	0.974881	1181.71	0.287905	1181.42	0.575811	1182	0.000487149	0.011287
										1.6	0.974881	1182.71	0.293549	1182.41	0.587098	1183	0.000496279	0.011287
										1.6	0.974881	1183.7	0.299312	1183.4	0.598624	1184	0.000505594	0.011287
										1.59	0.974296	1184.69	0.305197	1184.39	0.610393	1185	0.0005151	0.0120178
										1.59	0.974296	1185.69	0.311206	1185.38	0.622411	1186	0.000524799	0.0120178
										1.59	0.974296	1186.68	0.317342	1186.37	0.634683	1187	0.000534695	0.0120178
										1.57	0.973085	1187.68	0.323607	1187.35	0.647214	1188	0.000544793	0.0127955
										1.57	0.973085	1188.67	0.330005	1188.34	0.66001	1189	0.000555097	0.0127955
										1.57	0.973085	1189.66	0.336538	1189.33	0.673076	1190	0.00056561	0.0127955
										1.54	0.97116	1190.66	0.343209	1190.31	0.686417	1191	0.000576337	0.0133413
										1.52	0.9698	1191.65	0.35002	1191.3	0.70004	1192	0.000587282	0.0136229
										1.51	0.969097	1192.64	0.356975	1192.29	0.713951	1193	0.00059845	0.0139103
										1.49	0.967641	1193.64	0.364077	1193.27	0.728155	1194	0.000609845	0.0142036
										1.48	0.966887	1194.63	0.371329	1194.26	0.742658	1195	0.000621471	0.0145031
										1.47	0.966116	1195.62	0.378734	1195.24	0.757467	1196	0.000633334	0.0148089
										1.46	0.965326	1196.61	0.386294	1196.23	0.772588	1197	0.000645437	0.0156013
										1.46	0.965326	1197.61	0.394014	1197.21	0.788028	1198	0.000657787	0.0156013
										1.46	0.965326	1198.6	0.401897	1198.2	0.803793	1199	0.000670386	0.0156013
										1.46	0.965326	1199.59	0.409945	1199.18	0.81989	1200	0.000683242	0.0156013
										1.44	0.963692	1200.58	0.418163	1200.16	0.836326	1201	0.000696358	0.0167814
										1.44	0.963692	1201.57	0.426554	1201.15	0.853108	1202	0.00070974	0.0167814
										1.44	0.963692	1202.56	0.435121	1202.13	0.870242	1203	0.000723393	0.0167814
										1.43	0.962846	1203.56	0.443869	1203.11	0.887737	1204	0.000737323	0.0174947
										1.42	0.961981	1204.55	0.4528	1204.09	0.9056	1205	0.000751535	0.0178625
										1.41	0.961095	1205.54	0.461919	1205.08	0.923838	1206	0.000766035	0.0182379
										1.39	0.959262	1206.53	0.47123	1206.06	0.94246	1207	0.000780828	0.018621
										1.38	0.958313	1207.52	0.480736	1207.04	0.961472	1208	0.000795921	0.0190121
										1.36	0.956348	1208.51	0.490442	1208.02	0.980884	1209	0.000811318	0.0194112
										1.33	0.953226	1209.5	0.500351	1209	1.0007	1210	0.000827027	0.0198185
										1.32	0.952137	1210.49	0.510469	1209.98	1.02094	1211	0.000843053	0.0202342
										1.3	0.949881	1211.48	0.520798	1210.96	1.0416	1212	0.000859403	0.0206585
										1.28	0.947519	1212.47	0.531344	1211.94	1.06269	1213	0.000876082	0.0213112
										1.28	0.947519	1213.46	0.542111	1212.92	1.08422	1214	0.000893098	0.0213112
										1.26	0.945046	1214.45	0.553103	1213.89	1.10621	1215	0.000910458	0.0219842
										1.25	0.943766	1215.44	0.564325	1214.87	1.12865	1216	0.000928167	0.0224443
										1.24	0.942456	1216.42	0.575782	1215.85	1.15156	1217	0.000946232	0.023882
										1.24	0.942456	1217.41	0.587479	1216.83	1.17496	1218	0.000964662	0.023882
										1.24	0.942456	1218.4	0.59942	1217.8	1.19884	1219	0.000983462	0.023882
										1.24	0.942456	1219.39	0.611611	1218.78	1.22322	1220	0.00100264	0.023882
										1.24	0.942456	1220.38	0.624056	1219.75	1.24811	1221	0.00102221	0.023882
										1.22	0.939744	1221.36	0.636761	1220.73	1.27352	1222	0.00104216	0.0254094
										1.21	0.938341	1222.35	0.649731	1221.7	1.29946	1223	0.00106252	0.0259394
										1.2	0.936904	1223.34	0.662971	1222.67	1.32594	1224	0.00108329	0.0264802
										1.19	0.935435	1224.32	0.676488	1223.65	1.35298	1225	0.00110447	0.0275948
										1.19	0.935435	1225.31	0.690285	1224.62	1.38057	1226	0.00112608	0.0275948
										1.19	0.935435	1226.3	0.70437	1225.59	1.40874	1227	0.00114812	0.0275948
										1.16	0.930817	1227.28	0.718748	1226.56	1.4375	1228	0.0011706	0.0290523
										1.16	0.930817	1228.27	0.733424	1227.53	1.46685	1229	0.00119353	0.0290523
										1.15	0.929205	1229.25	0.748406	1228.5	1.49681	1230	0.00121692	0.0299624
										1.14	0.927556	1230.24	0.763698	1229.47	1.5274	1231	0.00124078	0.0305844
										1.13	0.925869	1231.22	0.779308	1230.44	1.55862	1232	0.00126511	0.031541
										1.13	0.925869	1232.2	0.795241	1231.41	1.59048	1233	0.00128993	0.031541
										1.12	0.924142	1233.19	0.811505	1232.38	1.62301	1234	0.00131524	0.0325264
										1.11	0.922375	1234.17	0.828105	1233.34	1.65621	1235	0.00134106	0.0331998
										1.1	0.920567	1235.15	0.845049	1234.31	1.6901	1236	0.00136739	0.0342353
										1.1	0.920567	1236.14	0.862343	1235.28	1.72469	1237	0.00139425	0.0342353
										1.09	0.918717	1237.12	0.879994	1236.24	1.75999	1238	0.00142164	0.0353018
										1.08	0.916824	1238.1	0.898009	1237.2	1.79602	1239	0.00144957	0.0360306
										1.06	0.912904	1239.08	0.916397	1238.17	1.83279	1240	0.00147806	0.0379162
										1.06	0.912904	1240.06	0.935163	1239.13	1.87033	1241	0.00150711	0.0379162
										1.06	0.912904	1241.05	0.954315	1240.09	1.90863	1242	0.00153674	0.0379162
										1.06	0.912904	1242.03	0.973862	1241.05	1.94772	1243	0.00156695	0.0379162
										1.05	0.910875	1243.01	0.993811	1242.01	1.98762	1244	0.00159777	0.0398965
										1.03	0.906675	1243.99	1.01417	1242.97	2.02834	1245	0.00162919	0.040716
										1.02	0.904501	1244.97	1.03495	1243.93	2.06989	1246	0.00166123	0.0424036
										1.02	0.904501	1245.94	1.05615	1244.89	2.11229	1247	0.0016939	0.0424036
										1.02	0.904501	1246.92	1.07778	1245.84	2.15557	1248	0.00172722	0.0424036
										0.99	0.897671	1247.9	1.09986	1246.8	2.19973	1249	0.00176119	0.0446071
										0.99	0.897671	1248.88	1.12239	1247.76	2.24479	1250	0.00179583	0.0446071
										0.97	0.892848	1249.85	1.14538	1248.71	2.29077	1251	0.00183115	0.0459812
										0.96	0.890352	1250.83	1.16884	1249.66	2.33769	1252	0.00186716	0.0469194
										0.95	0.887798	1251.81	1.19278	1250.61	2.38557	1253	0.00190388	0.048361
										0.95	0.887798	1252.78	1.21721	1251.57	2.43442	1254	0.00194132	0.048361
										0.94	0.885185	1253.76	1.24213	1252.52	2.48426	1255	0.00197949	0.0498445
										0.93	0.88251	1254.73	1.26756	1253.46	2.53512	1256	0.00201841	0.0508573
										0.91	0.876973	1255.71	1.29351	1254.41	2.58701	1257	0.00205808	0.053475
										0.91	0.876973	1256.68	1.31998	1255.36	2.63995	1258	0.00209853	0.053475
										0.91	0.876973	1257.65	1.34698	1256.31	2.69397	1259	0.00213977	0.053475
										0.91	0.876973	1258.63	1.37454	1257.25	2.74908	1260	0.00218181	0.053475
										0.9	0.874107	1259.6	1.40265	1258.19	2.8053	1261	0.00222466	0.0562192
										0.89	0.871175	1260.57	1.43132	1259.14	2.86265	1262	0.00226834	0.0579287
										0.89	0.871175	1261.54	1.46058	1260.08	2.92116	1263	0.00231287	0.0579287
										0.88	0.868174	1262.51	1.49042	1261.02	2.98085	1264	0.00235827	0.0602837
										0.88	0.868174	1263.48	1.52087	1261.96	3.04173	1265	0.00240453	0.0602837
										0.85	0.858746	1264.45	1.55192	1262.9	3.10384	1266	0.00245169	0.0646213
										0.85	0.858746	1265.42	1.5836	1263.83	3.1672	1267	0.00249976	0.0646213
										0.85	0.858746	1266.38	1.61591	1264.77	3.23182	1268	0.00254875	0.0646213
										0.85	0.858746	1267.35	1.64887	1265.7	3.29773	1269	0.00259869	0.0646213
										0.85	0.858746	1268.32	1.68248	1266.64	3.36496	1270	0.00264958	0.0646213
										0.84	0.855456	1269.28	1.71677	1267.57	3.43353	1271	0.00270144	0.0685682
										0.83	0.852089	1270.25	1.75173	1268.5	3.50347	1272	0.0027543	0.071322
										0.83	0.852089	1271.21	1.78739	1269.43	3.57479	1273	0.00280816	0.071322
										0.83	0.852089	1272.18	1.82376	1270.35	3.64753	1274	0.00286305	0.071322
										0.81	0.845118	1273.14	1.86085	1271.28	3.72171	1275	0.00291898	0.0749072
										0.81	0.845118	1274.1	1.89868	1272.2	3.79735	1276	0.00297598	0.0749072
										0.8	0.841511	1275.06	1.93724	1273.13	3.87449	1277	0.00303406	0.0771369
										0.79	0.837819	1276.02	1.97657	1274.05	3.95315	1278	0.00309323	0.081779
										0.79	0.837819	1276.98	2.01668	1274.97	4.03335	1279	0.00315352	0.081779
										0.79	0.837819	1277.94	2.05757	1275.88	4.11513	1280	0.00321495	0.081779
										0.79	0.837819	1278.9	2.09926	1276.8	4.19852	1281	0.00327753	0.081779
										0.79	0.837819	1279.86	2.14176	1277.72	4.28353	1282	0.00334129	0.081779
										0.77	0.830176	1280.81	2.1851	1278.63	4.3702	1283	0.00340624	0.0866732
										0.74	0.81803	1281.77	2.22928	1279.54	4.45857	1284	0.0034724	0.089218
										0.74	0.81803	1282.73	2.27432	1280.45	4.54865	1285	0.00353981	0.089218
										0.73	0.813791	1283.68	2.32024	1281.36	4.64048	1286	0.00360846	0.0918298
										0.72	0.809454	1284.63	2.36705	1282.27	4.73409	1287	0.00367839	0.0945098
										0.72	0.809454	1285.59	2.41476	1283.17	4.82951	1288	0.00374962	0.0945098
										0.71	0.805016	1286.54	2.46339	1284.07	4.92677	1289	0.00382217	0.0972594
										0.7	0.800474	1287.49	2.51295	1284.97	5.0259	1290	0.00389605	0.102
										0.7	0.800474	1288.44	2.56347	1285.87	5.12694	1291	0.00397129	0.102
										0.7	0.800474	1289.39	2.61496	1286.77	5.22992	1292	0.00404792	0.102
										0.7	0.800474	1290.33	2.66743	1287.67	5.33486	1293	0.00412595	0.102
										0.69	0.795826	1291.28	2.7209	1288.56	5.4418	1294	0.00420541	0.106943
										0.68	0.79107	1292.22	2.77539	1289.45	5.55078	1295	0.00428632	0.110008
										0.68	0.79107	1293.17	2.83091	1290.34	5.66183	1296	0.0043687	0.110008
										0.67	0.786204	1294.11	2.88749	1291.23	5.77498	1297	0.00445257	0.114214
										0.67	0.786204	1295.05	2.94514	1292.11	5.89027	1298	0.00453796	0.114214
										0.66	0.781224	1296	3.00387	1292.99	6.00773	1299	0.00462489	0.11746
										0.64	0.770913	1296.94	3.0637	1293.87	6.1274	1300	0.00471338	0.12191
										0.64	0.770913	1297.88	3.12466	1294.75	6.24931	1301	0.00480347	0.12191
										0.64	0.770913	1298.81	3.18675	1295.63	6.3735	1302	0.00489516	0.12191
										0.63	0.765577	1299.75	3.25	1296.5	6.50001	1303	0.00498849	0.128856
										0.63	0.765577	1300.69	3.31443	1297.37	6.62886	1304	0.00508349	0.128856
										0.63	0.765577	1301.62	3.38006	1298.24	6.76011	1305	0.00518016	0.128856
										0.62	0.760117	1302.55	3.44689	1299.11	6.89378	1306	0.00527855	0.136133
										0.62	0.760117	1303.49	3.51496	1299.97	7.02992	1307	0.00537867	0.136133
										0.62	0.760117	1304.42	3.58428	1300.83	7.16855	1308	0.00548054	0.136133
										0.61	0.754529	1305.35	3.65486	1301.69	7.30972	1309	0.0055842	0.142456
										0.61	0.754529	1306.27	3.72674	1302.55	7.45348	1310	0.00568968	0.142456
										0.58	0.736973	1307.2	3.79992	1303.4	7.59984	1311	0.00579698	0.149021
										0.58	0.736973	1308.13	3.87443	1304.25	7.74887	1312	0.00590615	0.149021
										0.58	0.736973	1309.05	3.95029	1305.1	7.90058	1313	0.0060172	0.149021
										0.57	0.730847	1309.97	4.02752	1305.94	8.05503	1314	0.00613016	0.154448
										0.56	0.724577	1310.89	4.10613	1306.79	8.21225	1315	0.00624506	0.160035
										0.56	0.724577	1311.81	4.18615	1307.63	8.37229	1316	0.00636192	0.160035
										0.56	0.724577	1312.73	4.26759	1308.46	8.53518	1317	0.00648078	0.160035
										0.55	0.718162	1313.65	4.35048	1309.3	8.70097	1318	0.00660164	0.165782
										0.53	0.704879	1314.57	4.43484	1310.13	8.86968	1319	0.00672455	0.170199
										0.53	0.704879	1315.48	4.52069	1310.96	9.04138	1320	0.00684953	0.170199
										0.52	0.698005	1316.39	4.60804	1311.78	9.21609	1321	0.0069766	0.177765
										0.52	0.698005	1317.3	4.69693	1312.61	9.39385	1322	0.00710579	0.177765
										0.52	0.698005	1318.21	4.78736	1313.43	9.57472	1323	0.00723713	0.177765
										0.51	0.69097	1319.12	4.87936	1314.24	9.75872	1324	0.00737064	0.185588
										0.51	0.69097	1320.03	4.97295	1315.05	9.94591	1325	0.00750635	0.185588
										0.49	0.676406	1320.93	5.06816	1315.86	10.1363	1326	0.00764428	0.192033
										0.49	0.676406	1321.84	5.16499	1316.67	10.33	1327	0.00778447	0.192033
										0.48	0.668869	1322.74	5.26348	1317.47	10.527	1328	0.00792693	0.196977
										0.47	0.661156	1323.64	5.36365	1318.27	10.7273	1329	0.0080717	0.203714
										0.47	0.661156	1324.53	5.4655	1319.07	10.931	1330	0.0082188	0.203714
										0.47	0.661156	1325.43	5.56908	1319.86	11.1382	1331	0.00836826	0.203714
										0.46	0.653263	1326.33	5.67439	1320.65	11.3488	1332	0.0085201	0.215905
										0.46	0.653263	1327.22	5.78145	1321.44	11.5629	1333	0.00867435	0.215905
										0.46	0.653263	1328.11	5.8903	1322.22	11.7806	1334	0.00883103	0.215905
										0.46	0.653263	1329	6.00094	1323	12.0019	1335	0.00899018	0.215905
										0.45	0.645187	1329.89	6.11341	1323.77	12.2268	1336	0.00915181	0.224926
										0.43	0.628465	1330.77	6.22771	1324.54	12.4554	1337	0.00931595	0.228607
										0.41	0.610955	1331.66	6.34388	1325.31	12.6878	1338	0.00948263	0.236092
										0.41	0.610955	1332.54	6.46192	1326.08	12.9238	1339	0.00965187	0.236092
										0.41	0.610955	1333.42	6.58187	1326.84	13.1637	1340	0.00982369	0.236092
										0.4	0.601893	1334.3	6.70374	1327.59	13.4075	1341	0.00999813	0.249583
										0.4	0.601893	1335.17	6.82756	1328.34	13.6551	1342	0.0101752	0.249583
										0.4	0.601893	1336.05	6.95333	1329.09	13.9067	1343	0.0103549	0.249583
										0.4	0.601893	1336.92	7.08109	1329.84	14.1622	1344	0.0105373	0.249583
										0.39	0.59262	1337.79	7.21085	1330.58	14.4217	1345	0.0107225	0.259521
										0.38	0.583131	1338.66	7.34264	1331.31	14.6853	1346	0.0109103	0.265603
										0.38	0.583131	1339.52	7.47646	1332.05	14.9529	1347	0.0111009	0.265603
										0.37	0.57342	1340.39	7.61235	1332.78	15.2247	1348	0.0112943	0.278026
										0.37	0.57342	1341.25	7.75032	1333.5	15.5006	1349	0.0114905	0.278026
										0.37	0.57342	1342.11	7.89038	1334.22	15.7808	1350	0.0116895	0.278026
										0.37	0.57342	1342.97	8.03257	1334.93	16.0651	1351	0.0118913	0.278026
										0.36	0.563484	1343.82	8.17688	1335.65	16.3538	1352	0.012096	0.288638
										0.35	0.553316	1344.68	8.32336	1336.35	16.6467	1353	0.0123036	0.295114
										0.35	0.553316	1345.53	8.47201	1337.06	16.944	1354	0.012514	0.295114
										0.34	0.542912	1346.38	8.62284	1337.75	17.2457	1355	0.0127274	0.301671
										0.33	0.532265	1347.22	8.77589	1338.45	17.5518	1356	0.0129438	0.312773
										0.33	0.532265	1348.07	8.93115	1339.14	17.8623	1357	0.0131631	0.312773
										0.33	0.532265	1348.91	9.08866	1339.82	18.1773	1358	0.0133854	0.312773
										0.33	0.532265	1349.75	9.24843	1340.5	18.4969	1359	0.0136106	0.312773
										0.32	0.52137	1350.59	9.41047	1341.18	18.8209	1360	0.0138389	0.326368
										0.32	0.52137	1351.43	9.57481	1341.85	19.1496	1361	0.0140703	0.326368
										0.31	0.510221	1352.26	9.74144	1342.52	19.4829	1362	0.0143046	0.337913
										0.31	0.510221	1353.09	9.9104	1343.18	19.8208	1363	0.014542	0.337913
										0.31	0.510221	1353.92	10.0817	1343.84	20.1634	1364	0.0147825	0.337913
										0.3	0.498813	1354.74	10.2553	1344.49	20.5107	1365	0.0150261	0.352009
										0.3	0.498813	1355.57	10.4313	1345.14	20.8627	1366	0.0152728	0.352009
										0.3	0.498813	1356.39	10.6097	1345.78	21.2194	1367	0.0155226	0.352009
										0.29	0.487139	1357.21	10.7905	1346.42	21.581	1368	0.0157756	0.371176
										0.29	0.487139	1358.03	10.9737	1347.05	21.9473	1369	0.0160317	0.371176
										0.29	0.487139	1358.84	11.1593	1347.68	22.3185	1370	0.0162909	0.371176
										0.29	0.487139	1359.65	11.3473	1348.31	22.6945	1371	0.0165533	0.371176
										0.29	0.487139	1360.46	11.5377	1348.92	23.0754	1372	0.0168188	0.371176
										0.28	0.475193	1361.27	11.7306	1349.54	23.4612	1373	0.0170876	0.3858
										0.27	0.462968	1362.07	11.926	1350.15	23.852	1374	0.0173595	0.395655
										0.27	0.462968	1362.88	12.1238	1350.75	24.2476	1375	0.0176346	0.395655
										0.27	0.462968	1363.68	12.3241	1351.35	24.6482	1376	0.017913	0.395655
										0.26	0.450459	1364.47	12.5269	1351.95	25.0538	1377	0.0181945	0.408076
										0.26	0.450459	1365.27	12.7322	1352.54	25.4644	1378	0.0184792	0.408076
										0.25	0.437659	1366.06	12.94	1353.12	25.88	1379	0.0187672	0.418087
										0.25	0.437659	1366.85	13.1503	1353.7	26.3006	1380	0.0190584	0.418087
										0.24	0.42456	1367.64	13.3631	1354.27	26.7262	1381	0.0193528	0.435733
										0.24	0.42456	1368.42	13.5784	1354.84	27.1569	1382	0.0196504	0.435733
										0.24	0.42456	1369.2	13.7963	1355.41	27.5926	1383	0.0199513	0.435733
										0.24	0.42456	1369.98	14.0167	1355.97	28.0334	1384	0.0202554	0.435733
										0.24	0.42456	1370.76	14.2396	1356.52	28.4793	1385	0.0205627	0.435733
										0.23	0.411156	1371.53	14.4651	1357.07	28.9302	1386	0.0208732	0.456049
										0.23	0.411156	1372.31	14.6931	1357.61	29.3863	1387	0.0211869	0.456049
										0.23	0.411156	1373.08	14.9237	1358.15	29.8474	1388	0.0215039	0.456049
										0.22	0.39744	1373.84	15.1568	1358.69	30.3137	1389	0.0218241	0.471348
										0.22	0.39744	1374.61	15.3925	1359.21	30.785	1390	0.0221475	0.471348
										0.22	0.39744	1375.37	15.6307	1359.74	31.2615	1391	0.0224741	0.471348
										0.21	0.383405	1376.13	15.8715	1360.26	31.743	1392	0.0228039	0.484114
										0.21	0.383405	1376.89	16.1149	1360.77	32.2297	1393	0.0231369	0.484114
										0.2	0.369043	1377.64	16.3607	1361.28	32.7215	1394	0.0234731	0.494323
										0.2	0.369043	1378.39	16.6092	1361.78	33.2184	1395	0.0238124	0.494323
										0.19	0.354346	1379.14	16.8602	1362.28	33.7203	1396	0.024155	0.504521
										0.19	0.354346	1379.89	17.1137	1362.77	34.2274	1397	0.0245006	0.504521
										0.18	0.339307	1380.63	17.3698	1363.26	34.7395	1398	0.0248495	0.517237
										0.18	0.339307	1381.37	17.6284	1363.74	35.2568	1399	0.0252014	0.517237
										0.18	0.339307	1382.11	17.8895	1364.22	35.7791	1400	0.0255565	0.517237
										0.17	0.323917	1382.85	18.1532	1364.69	36.3065	1401	0.0259147	0.529902
										0.17	0.323917	1383.58	18.4194	1365.16	36.8389	1402	0.026276	0.529902
										0.15	0.292054	1384.31	18.6882	1365.62	37.3764	1403	0.0266403	0.552515
										0.15	0.292054	1385.04	18.9594	1366.08	37.9189	1404	0.0270077	0.552515
										0.15	0.292054	1385.77	19.2332	1366.53	38.4664	1405	0.0273782	0.552515
										0.15	0.292054	1386.49	19.5094	1366.98	39.0189	1406	0.0277517	0.552515
										0.15	0.292054	1387.21	19.7882	1367.42	39.5764	1407	0.0281282	0.552515
										0.15	0.292054	1387.93	20.0694	1367.86	40.1389	1408	0.0285077	0.552515
										0.15	0.292054	1388.65	20.3531	1368.29	40.7063	1409	0.0288902	0.552515
										0.14	0.275564	1389.36	20.6393	1368.72	41.2786	1410	0.0292756	0.59428
										0.14	0.275564	1390.07	20.9279	1369.14	41.8559	1411	0.029664	0.59428
										0.14	0.275564	1390.78	21.219	1369.56	42.438	1412	0.0300553	0.59428
										0.14	0.275564	1391.49	21.5125	1369.97	43.025	1413	0.0304494	0.59428
										0.14	0.275564	1392.19	21.8085	1370.38	43.6169	1414	0.0308465	0.59428
										0.14	0.275564	1392.89	22.1068	1370.79	44.2136	1415	0.0312464	0.59428
										0.14	0.275564	1393.59	22.4075	1371.18	44.8151	1416	0.0316491	0.59428
										0.14	0.275564	1394.29	22.7107	1371.58	45.4213	1417	0.0320546	0.59428
										0.14	0.275564	1394.98	23.0162	1371.97	46.0323	1418	0.0324629	0.59428
										0.14	0.275564	1395.68	23.324	1372.35	46.6481	1419	0.0328739	0.59428
										0.13	0.25869	1396.37	23.6342	1372.73	47.2685	1420	0.0332877	0.632009
										0.13	0.25869	1397.05	23.9468	1373.11	47.8935	1421	0.0337041	0.632009
										0.13	0.25869	1397.74	24.2616	1373.48	48.5232	1422	0.0341232	0.632009
										0.13	0.25869	1398.42	24.5788	1373.84	49.1576	1423	0.034545	0.632009
										0.13	0.25869	1399.1	24.8982	1374.2	49.7964	1424	0.0349694	0.632009
										0.13	0.25869	1399.78	25.2199	1374.56	50.4398	1425	0.0353964	0.632009
										0.12	0.241422	1400.46	25.5439	1374.91	51.0878	1426	0.0358259	0.661238
										0.12	0.241422	1401.13	25.8701	1375.26	51.7402	1427	0.036258	0.661238
										0.12	0.241422	1401.8	26.1985	1375.6	52.397	1428	0.0366926	0.661238
										0.12	0.241422	1402.47	26.5291	1375.94	53.0582	1429	0.0371296	0.661238
										0.12	0.241422	1403.14	26.8619	1376.28	53.7238	1430	0.0375691	0.661238
										0.12	0.241422	1403.8	27.1969	1376.61	54.3938	1431	0.038011	0.661238
										0.12	0.241422	1404.47	27.534	1376.93	55.068	1432	0.0384553	0.661238
										0.11	0.223753	1405.13	27.8733	1377.25	55.7465	1433	0.038902	0.693123
										0.11	0.223753	1405.79	28.2146	1377.57	56.4292	1434	0.0393509	0.693123
										0.11	0.223753	1406.44	28.5581	1377.88	57.1161	1435	0.0398022	0.693123
										0.11	0.223753	1407.1	28.9036	1378.19	57.8072	1436	0.0402557	0.693123
										0.11	0.223753	1407.75	29.2512	1378.5	58.5024	1437	0.0407115	0.693123
										0.11	0.223753	1408.4	29.6008	1378.8	59.2016	1438	0.0411694	0.693123
										0.11	0.223753	1409.05	29.9525	1379.1	59.9049	1439	0.0416295	0.693123
										0.11	0.223753	1409.69	30.3061	1379.39	60.6122	1440	0.0420918	0.693123
										0.1	0.205672	1410.34	30.6617	1379.68	61.3234	1441	0.0425561	0.722845
										0.1	0.205672	1410.98	31.0193	1379.96	62.0385	1442	0.0430226	0.722845
										0.1	0.205672	1411.62	31.3788	1380.24	62.7575	1443	0.043491	0.722845
										0.1	0.205672	1412.26	31.7402	1380.52	63.4804	1444	0.0439615	0.722845
										0.1	0.205672	1412.9	32.1035	1380.79	64.207	1445	0.0444339	0.722845
										0.1	0.205672	1413.53	32.4687	1381.06	64.9374	1446	0.0449083	0.722845
										0.1	0.205672	1414.16	32.8358	1381.33	65.6715	1447	0.0453846	0.722845
										0.09	0.187169	1414.8	33.2046	1381.59	66.4093	1448	0.0458628	0.755486
										0.09	0.187169	1415.42	33.5753	1381.85	67.1507	1449	0.0463428	0.755486
										0.09	0.187169	1416.05	33.9478	1382.1	67.8956	1450	0.0468246	0.755486
										0.09	0.187169	1416.68	34.3221	1382.36	68.6442	1451	0.0473082	0.755486
										0.09	0.187169	1417.3	34.6981	1382.6	69.3962	1452	0.0477935	0.755486
										0.09	0.187169	1417.92	35.0758	1382.85	70.1517	1453	0.0482806	0.755486
										0.09	0.187169	1418.54	35.4553	1383.09	70.9106	1454	0.0487693	0.755486
										0.09	0.187169	1419.16	35.8364	1383.33	71.6728	1455	0.0492597	0.755486
										0.09	0.187169	1419.78	36.2192	1383.56	72.4385	1456	0.0497517	0.755486
										0.09	0.187169	1420.4	36.6037	1383.79	73.2074	1457	0.0502453	0.755486
										0.09	0.187169	1421.01	36.9898	1384.02	73.9795	1458	0.0507404	0.755486
										0.08	0.168236	1421.62	37.3775	1384.25	74.7549	1459	0.0512371	0.79669
										0.08	0.168236	1422.23	37.7667	1384.47	75.5334	1460	0.0517352	0.79669
										0.08	0.168236	1422.84	38.1576	1384.68	76.3151	1461	0.0522348	0.79669
										0.08	0.168236	1423.45	38.5499	1384.9	77.0999	1462	0.0527359	0.79669
										0.08	0.168236	1424.06	38.9438	1385.11	77.8877	1463	0.0532383	0.79669
										0.08	0.168236	1424.66	39.3392	1385.32	78.6785	1464	0.0537421	0.79669
										0.08	0.168236	1425.26	39.7361	1385.53	79.4722	1465	0.0542473	0.79669
										0.08	0.168236	1425.87	40.1345	1385.73	80.2689	1466	0.0547537	0.79669
										0.08	0.168236	1426.47	40.5342	1385.93	81.0685	1467	0.0552614	0.79669
										0.08	0.168236	1427.06	40.9354	1386.13	81.8709	1468	0.0557704	0.79669
										0.08	0.168236	1427.66	41.3381	1386.32	82.6761	1469	0.0562805	0.79669
										0.08	0.168236	1428.26	41.742	1386.52	83.4841	1470	0.0567919	0.79669
										0.08	0.168236	1428.85	42.1474	1386.71	84.2948	1471	0.0573044	0.79669
										0.08	0.168236	1429.45	42.5541	1386.89	85.1082	1472	0.057818	0.79669
										0.08	0.168236	1430.04	42.9621	1387.08	85.9242	1473	0.0583328	0.79669
										0.07	0.148862	1430.63	43.3714	1387.26	86.7428	1474	0.0588486	0.835797
										0.07	0.148862	1431.22	43.782	1387.44	87.564	1475	0.0593654	0.835797
										0.07	0.148862	1431.81	44.1939	1387.61	88.3877	1476	0.0598833	0.835797
										0.07	0.148862	1432.39	44.607	1387.79	89.2139	1477	0.0604021	0.835797
										0.07	0.148862	1432.98	45.0213	1387.96	90.0426	1478	0.0609219	0.835797
										0.07	0.148862	1433.56	45.4368	1388.13	90.8737	1479	0.0614426	0.835797
										0.07	0.148862	1434.15	45.8536	1388.29	91.7071	1480	0.0619643	0.835797
										0.07	0.148862	1434.73	46.2715	1388.46	92.5429	1481	0.0624868	0.835797
										0.07	0.148862	1435.31	46.6905	1388.62	93.381	1482	0.0630101	0.835797
										0.07	0.148862	1435.89	47.1107	1388.78	94.2214	1483	0.0635343	0.835797
										0.07	0.148862	1436.47	47.532	1388.94	95.064	1484	0.0640593	0.835797
										0.07	0.148862	1437.05	47.9544	1389.09	95.9088	1485	0.064585	0.835797
										0.07	0.148862	1437.62	48.3779	1389.24	96.7557	1486	0.0651115	0.835797
										0.07	0.148862	1438.2	48.8024	1389.4	97.6048	1487	0.0656388	0.835797
										0.07	0.148862	1438.77	49.228	1389.54	98.456	1488	0.0661667	0.835797
										0.06	0.129036	1439.35	49.6546	1389.69	99.3092	1489	0.0666953	0.875433
										0.06	0.129036	1439.92	50.0823	1389.84	100.165	1490	0.0672245	0.875433
										0.06	0.129036	1440.49	50.5109	1389.98	101.022	1491	0.0677544	0.875433
										0.06	0.129036	1441.06	50.9405	1390.12	101.881	1492	0.0682848	0.875433
										0.06	0.129036	1441.63	51.3711	1390.26	102.742	1493	0.0688159	0.875433
										0.06	0.129036	1442.2	51.8026	1390.39	103.605	1494	0.0693475	0.875433
										0.06	0.129036	1442.76	52.235	1390.53	104.47	1495	0.0698796	0.875433
										0.06	0.129036	1443.33	52.6684	1390.66	105.337	1496	0.0704123	0.875433
										0.06	0.129036	1443.9	53.1027	1390.79	106.205	1497	0.0709454	0.875433
										0.06	0.129036	1444.46	53.5378	1390.92	107.076	1498	0.0714791	0.875433
										0.06	0.129036	1445.03	53.9738	1391.05	107.948	1499	0.0720131	0.875433
										0.06	0.129036	1445.59	54.4107	1391.18	108.821	1500	0.0725476	0.875433
										0.06	0.129036	1446.15	54.8484	1391.3	109.697	1501	0.0730825	0.875433
										0.06	0.129036	1446.71	55.287	1391.43	110.574	1502	0.0736178	0.875433
										0.06	0.129036	1447.27	55.7263	1391.55	111.453	1503	0.0741535	0.875433
										0.06	0.129036	1447.83	56.1665	1391.67	112.333	1504	0.0746895	0.875433
										0.06	0.129036	1448.39	56.6074	1391.79	113.215	1505	0.0752258	0.875433
										0.06	0.129036	1448.95	57.0491	1391.9	114.098	1506	0.0757624	0.875433
										0.06	0.129036	1449.51	57.4916	1392.02	114.983	1507	0.0762994	0.875433
										0.06	0.129036	1450.07	57.9348	1392.13	115.87	1508	0.0768366	0.875433
										0.06	0.129036	1450.62	58.3787	1392.24	116.757	1509	0.077374	0.875433
										0.06	0.129036	1451.18	58.8233	1392.35	117.647	1510	0.0779117	0.875433
										0.06	0.129036	1451.73	59.2687	1392.46	118.537	1511	0.0784496	0.875433
										0.06	0.129036	1452.29	59.7147	1392.57	119.429	1512	0.0789878	0.875433
										0.06	0.129036	1452.84	60.1615	1392.68	120.323	1513	0.0795261	0.875433
										0.05	0.108749	1453.39	60.6089	1392.78	121.218	1514	0.0800645	0.907378
										0.05	0.108749	1453.94	61.0569	1392.89	122.114	1515	0.0806032	0.907378
										0.05	0.108749	1454.49	61.5056	1392.99	123.011	1516	0.0811419	0.907378
										0.05	0.108749	1455.05	61.9549	1393.09	123.91	1517	0.0816808	0.907378
										0.05	0.108749	1455.6	62.4048	1393.19	124.81	1518	0.0822198	0.907378
										0.05	0.108749	1456.14	62.8554	1393.29	125.711	1519	0.0827589	0.907378
										0.05	0.108749	1456.69	63.3065	1393.39	126.613	1520	0.083298	0.907378
										0.05	0.108749	1457.24	63.7582	1393.48	127.516	1521	0.0838373	0.907378
										0.05	0.108749	1457.79	64.2105	1393.58	128.421	1522	0.0843765	0.907378
										0.05	0.108749	1458.34	64.6634	1393.67	129.327	1523	0.0849158	0.907378
										0.05	0.108749	1458.88	65.1168	1393.77	130.234	1524	0.0854551	0.907378
										0.05	0.108749	1459.43	65.5708	1393.86	131.142	1525	0.0859944	0.907378
										0.05	0.108749	1459.97	66.0253	1393.95	132.051	1526	0.0865338	0.907378
										0.05	0.108749	1460.52	66.4803	1394.04	132.961	1527	0.087073	0.907378
										0.05	0.108749	1461.06	66.9358	1394.13	133.872	1528	0.0876123	0.907378
										0.05	0.108749	1461.61	67.3918	1394.22	134.784	1529	0.0881515	0.907378
										0.05	0.108749	1462.15	67.8484	1394.3	135.697	1530	0.0886907	0.907378
										0.05	0.108749	1462.69	68.3054	1394.39	136.611	1531	0.0892297	0.907378
										0.05	0.108749	1463.24	68.7629	1394.47	137.526	1532	0.0897687	0.907378
										0.05	0.108749	1463.78	69.2208	1394.56	138.442	1533	0.0903076	0.907378
										0.05	0.108749	1464.32	69.6792	1394.64	139.358	1534	0.0908464	0.907378
										0.05	0.108749	1464.86	70.1381	1394.72	140.276	1535	0.0913851	0.907378

## Sheet: Distinct Peptide Level Data
Distinct Peptide Level Data		Confidence Threshold	Forward	Reverse	Correct	Incorrect	Total	Global FDR	q-value		Fit Confidence Threshold	Fit Forward	Fit Reverse	Fit Correct	Fit Incorrect	Fit Total	Fit Global FDR	Fit Local FDR
		1	2328	0	2328	0	2328	0	0		1	0.999945	5.547e-05	0.999889	0.00011094	1	0.00011094	0.000111679
		0.9999	3627	0	3627	0	3627	0	0		1	1.99989	0.00011094	1.99978	0.000221881	2	0.00011094	0.000111679
		0.9998	4239	0	4239	0	4239	0	0		1	2.99983	0.000166411	2.99967	0.000332822	3	0.000110941	0.000111679
		0.9997	4723	0	4723	0	4723	0	0		1	3.99978	0.000221882	3.99956	0.000443764	4	0.000110941	0.000111679
		0.9996	5133	0	5133	0	5133	0	0		1	4.99972	0.000277353	4.99945	0.000554706	5	0.000110941	0.000111679
		0.9995	5274	0	5274	0	5274	0	0		1	5.99967	0.000332825	5.99933	0.000665649	6	0.000110942	0.000111679
		0.9994	5371	0	5371	0	5371	0	0		1	6.99961	0.000388296	6.99922	0.000776593	7	0.000110942	0.000111679
		0.9993	5460	0	5460	0	5460	0	0		1	7.99956	0.000443768	7.99911	0.000887537	8	0.000110942	0.000111679
		0.9992	5534	0	5534	0	5534	0	0		1	8.9995	0.000499241	8.999	0.000998482	9	0.000110942	0.000111679
		0.9991	5585	0	5585	0	5585	0	0		1	9.99945	0.000554713	9.99889	0.00110943	10	0.000110943	0.000111679
		0.999	5635	0	5635	0	5635	0	0		1	10.9994	0.000610186	10.9988	0.00122037	11	0.000110943	0.000111679
		0.9989	5687	0	5687	0	5687	0	0		1	11.9993	0.00066566	11.9987	0.00133132	12	0.000110943	0.000111679
		0.9988	5731	0	5731	0	5731	0	0		1	12.9993	0.000721133	12.9986	0.00144227	13	0.000110944	0.000111679
		0.9987	5772	0	5772	0	5772	0	0		1	13.9992	0.000776607	13.9984	0.00155321	14	0.000110944	0.000111679
		0.9986	5814	0	5814	0	5814	0	0		1	14.9992	0.000832081	14.9983	0.00166416	15	0.000110944	0.000111679
		0.9985	5852	0	5852	0	5852	0	0		1	15.9991	0.000887555	15.9982	0.00177511	16	0.000110944	0.000111679
		0.9984	5883	0	5883	0	5883	0	0		1	16.9991	0.00094303	16.9981	0.00188606	17	0.000110945	0.000111679
		0.9983	5912	0	5912	0	5912	0	0		1	17.999	0.000998505	17.998	0.00199701	18	0.000110945	0.000111679
		0.9982	5944	0	5944	0	5944	0	0		1	18.9989	0.00105398	18.9979	0.00210796	19	0.000110945	0.000111679
		0.9981	5972	0	5972	0	5972	0	0		1	19.9989	0.00110946	19.9978	0.00221891	20	0.000110946	0.000111679
		0.998	5996	0	5996	0	5996	0	0		1	20.9988	0.00116493	20.9977	0.00232986	21	0.000110946	0.000111679
		0.9979	6020	0	6020	0	6020	0	0		1	21.9988	0.00122041	21.9976	0.00244082	22	0.000110946	0.000111679
		0.9978	6039	0	6039	0	6039	0	0		1	22.9987	0.00127588	22.9974	0.00255177	23	0.000110946	0.000111679
		0.9977	6064	0	6064	0	6064	0	0		1	23.9987	0.00133136	23.9973	0.00266272	24	0.000110947	0.000111679
		0.9976	6084	1	6083	2	6085	0.000328677	0.000311769		1	24.9986	0.00138684	24.9972	0.00277368	25	0.000110947	0.000111679
		0.9975	6112	1	6111	2	6113	0.000327172	0.000311769		1	25.9986	0.00144232	25.9971	0.00288463	26	0.000110947	0.000111679
		0.9974	6127	1	6126	2	6128	0.000326371	0.000311769		1	26.9985	0.00149779	26.997	0.00299559	27	0.000110948	0.000111679
		0.9973	6143	1	6142	2	6144	0.000325521	0.000311769		1	27.9984	0.00155327	27.9969	0.00310654	28	0.000110948	0.000111679
		0.9972	6155	1	6154	2	6156	0.000324886	0.000311769		1	28.9984	0.00160875	28.9968	0.0032175	29	0.000110948	0.000111679
		0.9971	6170	1	6169	2	6171	0.000324097	0.000311769		1	29.9983	0.00166423	29.9967	0.00332845	30	0.000110948	0.000111679
		0.997	6186	1	6185	2	6187	0.000323258	0.000311769		1	30.9983	0.00171971	30.9966	0.00343941	31	0.000110949	0.000111679
		0.9969	6207	1	6206	2	6208	0.000322165	0.000311769		1	31.9982	0.00177519	31.9964	0.00355037	32	0.000110949	0.000111679
		0.9968	6220	1	6219	2	6221	0.000321492	0.000311769		1	32.9982	0.00183066	32.9963	0.00366133	33	0.000110949	0.000111679
		0.9967	6235	1	6234	2	6236	0.000320718	0.000311769		1	33.9981	0.00188614	33.9962	0.00377229	34	0.00011095	0.000111679
		0.9966	6252	1	6251	2	6253	0.000319846	0.000311769		1	34.9981	0.00194162	34.9961	0.00388325	35	0.00011095	0.000111679
		0.9965	6266	1	6265	2	6267	0.000319132	0.000311769		1	35.998	0.0019971	35.996	0.00399421	36	0.00011095	0.000111679
		0.9964	6280	1	6279	2	6281	0.000318421	0.000311769		1	36.9979	0.00205258	36.9959	0.00410517	37	0.000110951	0.000111679
		0.9963	6292	1	6291	2	6293	0.000317813	0.000311769		1	37.9979	0.00210807	37.9958	0.00421613	38	0.000110951	0.000111679
		0.9962	6301	1	6300	2	6302	0.00031736	0.000311769		1	38.9978	0.00216355	38.9957	0.00432709	39	0.000110951	0.000111679
		0.9961	6315	1	6314	2	6316	0.000316656	0.000311769		1	39.9978	0.00221903	39.9956	0.00443806	40	0.000110951	0.000111679
		0.996	6326	1	6325	2	6327	0.000316106	0.000311769		1	40.9977	0.00227451	40.9955	0.00454902	41	0.000110952	0.000111679
		0.9959	6340	1	6339	2	6341	0.000315408	0.000311769		1	41.9977	0.00232999	41.9953	0.00465998	42	0.000110952	0.000111679
		0.9958	6345	1	6344	2	6346	0.000315159	0.000311769		1	42.9976	0.00238547	42.9952	0.00477095	43	0.000110952	0.000111679
		0.9957	6354	1	6353	2	6355	0.000314713	0.000311769		1	43.9976	0.00244096	43.9951	0.00488191	44	0.000110953	0.000111679
		0.9956	6364	1	6363	2	6365	0.000314218	0.000311769		1	44.9975	0.00249644	44.995	0.00499288	45	0.000110953	0.000111679
		0.9955	6376	1	6375	2	6377	0.000313627	0.000311769		1	45.9974	0.00255192	45.9949	0.00510384	46	0.000110953	0.000111679
		0.9954	6385	1	6384	2	6386	0.000313185	0.000311769		1	46.9974	0.00260741	46.9948	0.00521481	47	0.000110953	0.000111679
		0.9953	6396	1	6395	2	6397	0.000312647	0.000311769		1	47.9973	0.00266289	47.9947	0.00532578	48	0.000110954	0.000111679
		0.9952	6402	1	6401	2	6403	0.000312354	0.000311769		1	48.9973	0.00271837	48.9946	0.00543675	49	0.000110954	0.000111679
		0.9951	6414	1	6413	2	6415	0.000311769	0.000311769		1	49.9972	0.00277386	49.9945	0.00554771	50	0.000110954	0.000111679
		0.995	6425	2	6423	4	6427	0.000622374	0.000621504		1	50.9972	0.00282934	50.9943	0.00565868	51	0.000110955	0.000111679
		0.9949	6434	2	6432	4	6436	0.000621504	0.000621504		1	51.9971	0.00288483	51.9942	0.00576965	52	0.000110955	0.000111679
		0.9948	6443	3	6440	6	6446	0.00093081	0.00087222		1	52.9971	0.00294031	52.9941	0.00588062	53	0.000110955	0.000111679
		0.9947	6452	3	6449	6	6455	0.000929512	0.00087222		1	53.997	0.0029958	53.994	0.00599159	54	0.000110955	0.000111679
		0.9946	6461	3	6458	6	6464	0.000928218	0.00087222		1	54.9969	0.00305128	54.9939	0.00610257	55	0.000110956	0.000111679
		0.9945	6474	3	6471	6	6477	0.000926355	0.00087222		1	55.9969	0.00310677	55.9938	0.00621354	56	0.000110956	0.000111679
		0.9944	6485	3	6482	6	6488	0.000924784	0.00087222		1	56.9968	0.00316225	56.9937	0.00632451	57	0.000110956	0.000111679
		0.9943	6493	3	6490	6	6496	0.000923645	0.00087222		1	57.9968	0.00321774	57.9936	0.00643548	58	0.000110957	0.000111679
		0.9942	6500	3	6497	6	6503	0.000922651	0.00087222		1	58.9967	0.00327323	58.9935	0.00654646	59	0.000110957	0.000111679
		0.9941	6507	3	6504	6	6510	0.000921659	0.00087222		1	59.9967	0.00332872	59.9933	0.00665743	60	0.000110957	0.000111679
		0.994	6516	3	6513	6	6519	0.000920387	0.00087222		1	60.9966	0.0033842	60.9932	0.00676841	61	0.000110957	0.000111679
		0.9939	6523	3	6520	6	6526	0.000919399	0.00087222		1	61.9966	0.00343969	61.9931	0.00687938	62	0.000110958	0.000111679
		0.9938	6529	3	6526	6	6532	0.000918555	0.00087222		1	62.9965	0.00349518	62.993	0.00699036	63	0.000110958	0.000111679
		0.9937	6537	3	6534	6	6540	0.000917431	0.00087222		1	63.9964	0.00355067	63.9929	0.00710133	64	0.000110958	0.000111679
		0.9936	6540	3	6537	6	6543	0.000917011	0.00087222		1	64.9964	0.00360616	64.9928	0.00721231	65	0.000110959	0.000111679
		0.9935	6550	3	6547	6	6553	0.000915611	0.00087222		1	65.9963	0.00366164	65.9927	0.00732329	66	0.000110959	0.000111679
		0.9934	6560	3	6557	6	6563	0.000914216	0.00087222		1	66.9963	0.00371713	66.9926	0.00743427	67	0.000110959	0.000111679
		0.9933	6567	3	6564	6	6570	0.000913242	0.00087222		1	67.9962	0.00377262	67.9925	0.00754525	68	0.000110959	0.000111679
		0.9932	6570	3	6567	6	6573	0.000912825	0.00087222		1	68.9962	0.00382811	68.9923	0.00765623	69	0.00011096	0.000111679
		0.9931	6579	3	6576	6	6582	0.000911577	0.00087222		1	69.9961	0.0038836	69.9922	0.00776721	70	0.00011096	0.000111679
		0.993	6587	3	6584	6	6590	0.00091047	0.00087222		1	70.9961	0.00393909	70.9921	0.00787819	71	0.00011096	0.000111679
		0.9929	6593	3	6590	6	6596	0.000909642	0.00087222		1	71.996	0.00399458	71.992	0.00798917	72	0.000110961	0.000111679
		0.9928	6601	3	6598	6	6604	0.00090854	0.00087222		1	72.9959	0.00405007	72.9919	0.00810015	73	0.000110961	0.000111679
		0.9927	6605	3	6602	6	6608	0.00090799	0.00087222		1	73.9959	0.00410557	73.9918	0.00821113	74	0.000110961	0.000111679
		0.9926	6610	3	6607	6	6613	0.000907304	0.00087222		1	74.9958	0.00416106	74.9917	0.00832211	75	0.000110962	0.000111679
		0.9925	6619	3	6616	6	6622	0.000906071	0.00087222		1	75.9958	0.00421655	75.9916	0.0084331	76	0.000110962	0.000111679
		0.9924	6624	3	6621	6	6627	0.000905387	0.00087222		1	76.9957	0.00427204	76.9915	0.00854408	77	0.000110962	0.000111679
		0.9923	6628	3	6625	6	6631	0.000904841	0.00087222		1	77.9957	0.00432753	77.9913	0.00865507	78	0.000110962	0.000111679
		0.9922	6635	3	6632	6	6638	0.000903887	0.00087222		1	78.9956	0.00438303	78.9912	0.00876605	79	0.000110963	0.000111679
		0.9921	6640	3	6637	6	6643	0.000903206	0.00087222		1	79.9956	0.00443852	79.9911	0.00887704	80	0.000110963	0.000111679
		0.992	6644	3	6641	6	6647	0.000902663	0.00087222		1	80.9955	0.00449401	80.991	0.00898802	81	0.000110963	0.000111679
		0.9919	6646	3	6643	6	6649	0.000902391	0.00087222		1	81.9955	0.00454951	81.9909	0.00909901	82	0.000110964	0.000111679
		0.9918	6650	3	6647	6	6653	0.000901849	0.00087222		1	82.9954	0.004605	82.9908	0.00921	83	0.000110964	0.000111679
		0.9917	6659	3	6656	6	6662	0.00090063	0.00087222		1	83.9953	0.00466049	83.9907	0.00932099	84	0.000110964	0.000111679
		0.9916	6668	3	6665	6	6671	0.000899415	0.00087222		1	84.9953	0.00471599	84.9906	0.00943198	85	0.000110964	0.000111679
		0.9915	6676	3	6673	6	6679	0.000898338	0.00087222		1	85.9952	0.00477148	85.9905	0.00954297	86	0.000110965	0.000111679
		0.9914	6682	3	6679	6	6685	0.000897532	0.00087222		1	86.9952	0.00482698	86.9903	0.00965396	87	0.000110965	0.000111679
		0.9913	6687	3	6684	6	6690	0.000896861	0.00087222		1	87.9951	0.00488247	87.9902	0.00976495	88	0.000110965	0.000111679
		0.9912	6693	3	6690	6	6696	0.000896057	0.00087222		1	88.9951	0.00493797	88.9901	0.00987594	89	0.000110966	0.000111679
		0.9911	6700	3	6697	6	6703	0.000895122	0.00087222		1	89.995	0.00499346	89.99	0.00998693	90	0.000110966	0.000111679
		0.991	6703	3	6700	6	6706	0.000894721	0.00087222		1	90.995	0.00504896	90.9899	0.0100979	91	0.000110966	0.000111679
		0.9909	6707	3	6704	6	6710	0.000894188	0.00087222		1	91.9949	0.00510446	91.9898	0.0102089	92	0.000110966	0.000111679
		0.9908	6713	3	6710	6	6716	0.000893389	0.00087222		1	92.9948	0.00515995	92.9897	0.0103199	93	0.000110967	0.000111679
		0.9907	6718	3	6715	6	6721	0.000892724	0.00087222		1	93.9948	0.00521545	93.9896	0.0104309	94	0.000110967	0.000111679
		0.9906	6723	3	6720	6	6726	0.000892061	0.00087222		1	94.9947	0.00527095	94.9895	0.0105419	95	0.000110967	0.000111679
		0.9905	6729	3	6726	6	6732	0.000891266	0.00087222		1	95.9947	0.00532645	95.9893	0.0106529	96	0.000110968	0.000111679
		0.9904	6734	3	6731	6	6737	0.000890604	0.00087222		1	96.9946	0.00538194	96.9892	0.0107639	97	0.000110968	0.000111679
		0.9903	6739	3	6736	6	6742	0.000889944	0.00087222		1	97.9946	0.00543744	97.9891	0.0108749	98	0.000110968	0.000111679
		0.9902	6743	3	6740	6	6746	0.000889416	0.00087222		1	98.9945	0.00549294	98.989	0.0109859	99	0.000110968	0.000111679
		0.9901	6748	3	6745	6	6751	0.000888757	0.00087222		1	99.9945	0.00554844	99.9889	0.0110969	100	0.000110969	0.000111679
		0.99	6754	3	6751	6	6757	0.000887968	0.00087222		1	100.994	0.00560394	100.989	0.0112079	101	0.000110969	0.000111679
		0.9899	6759	3	6756	6	6762	0.000887311	0.00087222		1	101.994	0.00565944	101.989	0.0113189	102	0.000110969	0.000111679
		0.9898	6763	3	6760	6	6766	0.000886787	0.00087222		1	102.994	0.00571494	102.989	0.0114299	103	0.00011097	0.000111679
		0.9897	6768	3	6765	6	6771	0.000886132	0.00087222		1	103.994	0.00577044	103.988	0.0115409	104	0.00011097	0.000111679
		0.9896	6772	3	6769	6	6775	0.000885609	0.00087222		1	104.994	0.00582594	104.988	0.0116519	105	0.00011097	0.000111679
		0.9895	6779	3	6776	6	6782	0.000884695	0.00087222		1	105.994	0.00588144	105.988	0.0117629	106	0.000110971	0.000111679
		0.9894	6784	3	6781	6	6787	0.000884043	0.00087222		1	106.994	0.00593694	106.988	0.0118739	107	0.000110971	0.000111679
		0.9893	6791	3	6788	6	6794	0.000883132	0.00087222		1	107.994	0.00599244	107.988	0.0119849	108	0.000110971	0.000111679
		0.9892	6793	3	6790	6	6796	0.000882872	0.00087222		1	108.994	0.00604794	108.988	0.0120959	109	0.000110971	0.000111679
		0.9891	6799	3	6796	6	6802	0.000882094	0.00087222		1	109.994	0.00610344	109.988	0.0122069	110	0.000110972	0.000111679
		0.989	6803	3	6800	6	6806	0.000881575	0.00087222		1	110.994	0.00615894	110.988	0.0123179	111	0.000110972	0.000111679
		0.9889	6806	3	6803	6	6809	0.000881187	0.00087222		1	111.994	0.00621445	111.988	0.0124289	112	0.000110972	0.000111679
		0.9888	6809	3	6806	6	6812	0.000880799	0.00087222		1	112.994	0.00626995	112.987	0.0125399	113	0.000110973	0.000111679
		0.9887	6816	3	6813	6	6819	0.000879894	0.00087222		1	113.994	0.00632545	113.987	0.0126509	114	0.000110973	0.000111679
		0.9886	6819	3	6816	6	6822	0.000879507	0.00087222		1	114.994	0.00638095	114.987	0.0127619	115	0.000110973	0.000111679
		0.9885	6822	3	6819	6	6825	0.000879121	0.00087222		1	115.994	0.00643646	115.987	0.0128729	116	0.000110973	0.000111679
		0.9884	6827	3	6824	6	6830	0.000878477	0.00087222		1	116.994	0.00649196	116.987	0.0129839	117	0.000110974	0.000111679
		0.9883	6831	3	6828	6	6834	0.000877963	0.00087222		1	117.993	0.00654747	117.987	0.0130949	118	0.000110974	0.000111679
		0.9882	6832	3	6829	6	6835	0.000877835	0.00087222		1	118.993	0.00660297	118.987	0.0132059	119	0.000110974	0.000111679
		0.9881	6833	3	6830	6	6836	0.000877706	0.00087222		1	119.993	0.00665847	119.987	0.0133169	120	0.000110975	0.000111679
		0.988	6837	3	6834	6	6840	0.000877193	0.00087222		1	120.993	0.00671398	120.987	0.013428	121	0.000110975	0.000111679
		0.9879	6841	3	6838	6	6844	0.00087668	0.00087222		1	121.993	0.00676948	121.986	0.013539	122	0.000110975	0.000111679
		0.9878	6843	3	6840	6	6846	0.000876424	0.00087222		1	122.993	0.00682499	122.986	0.01365	123	0.000110975	0.000111679
		0.9877	6845	3	6842	6	6848	0.000876168	0.00087222		1	123.993	0.0068805	123.986	0.013761	124	0.000110976	0.000111679
		0.9876	6848	3	6845	6	6851	0.000875785	0.00087222		1	124.993	0.006936	124.986	0.013872	125	0.000110976	0.000111679
		0.9875	6852	3	6849	6	6855	0.000875274	0.00087222		1	125.993	0.00699151	125.986	0.013983	126	0.000110976	0.000111679
		0.9874	6853	3	6850	6	6856	0.000875146	0.00087222		1	126.993	0.00704701	126.986	0.014094	127	0.000110977	0.000111679
		0.9873	6856	3	6853	6	6859	0.000874763	0.00087222		1	127.993	0.00710252	127.986	0.014205	128	0.000110977	0.000111679
		0.9872	6859	3	6856	6	6862	0.000874381	0.00087222		1	128.993	0.00715803	128.986	0.0143161	129	0.000110977	0.000111679
		0.9871	6862	3	6859	6	6865	0.000873999	0.00087222		1	129.993	0.00721354	129.986	0.0144271	130	0.000110977	0.000111679
		0.987	6863	3	6860	6	6866	0.000873871	0.00087222		1	130.993	0.00726904	130.985	0.0145381	131	0.000110978	0.000111679
		0.9869	6866	3	6863	6	6869	0.00087349	0.00087222		1	131.993	0.00732455	131.985	0.0146491	132	0.000110978	0.000111679
		0.9868	6868	3	6865	6	6871	0.000873235	0.00087222		1	132.993	0.00738006	132.985	0.0147601	133	0.000110978	0.000111679
		0.9867	6869	3	6866	6	6872	0.000873108	0.00087222		1	133.993	0.00743557	133.985	0.0148711	134	0.000110979	0.000111679
		0.9866	6874	3	6871	6	6877	0.000872473	0.00087222		1	134.993	0.00749108	134.985	0.0149822	135	0.000110979	0.000111679
		0.9865	6876	3	6873	6	6879	0.00087222	0.00087222		1	135.992	0.00754659	135.985	0.0150932	136	0.000110979	0.000111679
		0.9864	6879	4	6875	8	6883	0.00116228	0.0011554		1	136.992	0.0076021	136.985	0.0152042	137	0.000110979	0.000111679
		0.9863	6880	4	6876	8	6884	0.00116212	0.0011554		1	137.992	0.00765761	137.985	0.0153152	138	0.00011098	0.000111679
		0.9862	6885	4	6881	8	6889	0.00116127	0.0011554		1	138.992	0.00771312	138.985	0.0154262	139	0.00011098	0.000111679
		0.986	6886	4	6882	8	6890	0.0011611	0.0011554		1	139.992	0.00776863	139.984	0.0155373	140	0.00011098	0.000111679
		0.9859	6889	4	6885	8	6893	0.0011606	0.0011554		1	140.992	0.00782414	140.984	0.0156483	141	0.000110981	0.000111679
		0.9858	6891	4	6887	8	6895	0.00116026	0.0011554		1	141.992	0.00787965	141.984	0.0157593	142	0.000110981	0.000111679
		0.9857	6896	4	6892	8	6900	0.00115942	0.0011554		1	142.992	0.00793516	142.984	0.0158703	143	0.000110981	0.000111679
		0.9856	6897	4	6893	8	6901	0.00115925	0.0011554		1	143.992	0.00799067	143.984	0.0159813	144	0.000110982	0.000111679
		0.9855	6903	4	6899	8	6907	0.00115825	0.0011554		1	144.992	0.00804618	144.984	0.0160924	145	0.000110982	0.000111679
		0.9854	6906	4	6902	8	6910	0.00115774	0.0011554		1	145.992	0.00810169	145.984	0.0162034	146	0.000110982	0.000111679
		0.9852	6911	4	6907	8	6915	0.00115691	0.0011554		1	146.992	0.00815721	146.984	0.0163144	147	0.000110982	0.000111679
		0.9851	6913	4	6909	8	6917	0.00115657	0.0011554		1	147.992	0.00821272	147.984	0.0164254	148	0.000110983	0.000111679
		0.985	6918	4	6914	8	6922	0.00115574	0.0011554		1	148.992	0.00826823	148.983	0.0165365	149	0.000110983	0.000111679
		0.9849	6920	4	6916	8	6924	0.0011554	0.0011554		1	149.992	0.00832375	149.983	0.0166475	150	0.000110983	0.000111679
		0.9848	6923	5	6918	10	6928	0.00144342	0.00142959		1	150.992	0.00837926	150.983	0.0167585	151	0.000110984	0.000111679
		0.9847	6927	5	6922	10	6932	0.00144259	0.00142959		1	151.992	0.00843477	151.983	0.0168695	152	0.000110984	0.000111679
		0.9846	6930	5	6925	10	6935	0.00144196	0.00142959		1	152.992	0.00849029	152.983	0.0169806	153	0.000110984	0.000111679
		0.9845	6933	5	6928	10	6938	0.00144134	0.00142959		1	153.991	0.0085458	153.983	0.0170916	154	0.000110984	0.000111679
		0.9844	6935	5	6930	10	6940	0.00144092	0.00142959		1	154.991	0.00860132	154.983	0.0172026	155	0.000110985	0.000111679
		0.9843	6938	5	6933	10	6943	0.0014403	0.00142959		1	155.991	0.00865683	155.983	0.0173137	156	0.000110985	0.000111679
		0.9842	6941	5	6936	10	6946	0.00143968	0.00142959		1	156.991	0.00871235	156.983	0.0174247	157	0.000110985	0.000111679
		0.9841	6943	5	6938	10	6948	0.00143926	0.00142959		1	157.991	0.00876786	157.982	0.0175357	158	0.000110986	0.000111679
		0.984	6947	5	6942	10	6952	0.00143843	0.00142959		1	158.991	0.00882338	158.982	0.0176468	159	0.000110986	0.000111679
		0.9839	6949	5	6944	10	6954	0.00143802	0.00142959		1	159.991	0.00887889	159.982	0.0177578	160	0.000110986	0.000111679
		0.9838	6951	5	6946	10	6956	0.00143761	0.00142959		1	160.991	0.00893441	160.982	0.0178688	161	0.000110986	0.000111679
		0.9837	6955	5	6950	10	6960	0.00143678	0.00142959		1	161.991	0.00898993	161.982	0.0179799	162	0.000110987	0.000111679
		0.9836	6956	5	6951	10	6961	0.00143658	0.00142959		1	162.991	0.00904544	162.982	0.0180909	163	0.000110987	0.000111679
		0.9835	6959	5	6954	10	6964	0.00143596	0.00142959		1	163.991	0.00910096	163.982	0.0182019	164	0.000110987	0.000111679
		0.9834	6962	5	6957	10	6967	0.00143534	0.00142959		1	164.991	0.00915648	164.982	0.018313	165	0.000110988	0.000111679
		0.9833	6964	5	6959	10	6969	0.00143493	0.00142959		1	165.991	0.009212	165.982	0.018424	166	0.000110988	0.000111679
		0.9832	6968	5	6963	10	6973	0.0014341	0.00142959		1	166.991	0.00926751	166.981	0.018535	167	0.000110988	0.000111679
		0.9831	6971	5	6966	10	6976	0.00143349	0.00142959		1	167.991	0.00932303	167.981	0.0186461	168	0.000110988	0.000111679
		0.983	6975	5	6970	10	6980	0.00143266	0.00142959		1	168.991	0.00937855	168.981	0.0187571	169	0.000110989	0.000111679
		0.9829	6977	5	6972	10	6982	0.00143225	0.00142959		1	169.991	0.00943407	169.981	0.0188681	170	0.000110989	0.000111679
		0.9828	6980	5	6975	10	6985	0.00143164	0.00142959		1	170.991	0.00948959	170.981	0.0189792	171	0.000110989	0.000111679
		0.9827	6983	5	6978	10	6988	0.00143102	0.00142959		1	171.99	0.00954511	171.981	0.0190902	172	0.00011099	0.000111679
		0.9826	6990	5	6985	10	6995	0.00142959	0.00142959		1	172.99	0.00960063	172.981	0.0192013	173	0.00011099	0.000111679
		0.9825	6991	6	6985	12	6997	0.00171502	0.00170092		1	173.99	0.00965615	173.981	0.0193123	174	0.00011099	0.000111679
		0.9824	6994	6	6988	12	7000	0.00171429	0.00170092		1	174.99	0.00971167	174.981	0.0194233	175	0.000110991	0.000111679
		0.9823	6996	6	6990	12	7002	0.0017138	0.00170092		1	175.99	0.00976719	175.98	0.0195344	176	0.000110991	0.000111679
		0.9821	7000	6	6994	12	7006	0.00171282	0.00170092		1	176.99	0.00982271	176.98	0.0196454	177	0.000110991	0.000111679
		0.982	7003	6	6997	12	7009	0.00171208	0.00170092		1	177.99	0.00987823	177.98	0.0197565	178	0.000110991	0.000111679
		0.9819	7004	6	6998	12	7010	0.00171184	0.00170092		1	178.99	0.00993375	178.98	0.0198675	179	0.000110992	0.000111679
		0.9818	7007	6	7001	12	7013	0.00171111	0.00170092		1	179.99	0.00998928	179.98	0.0199786	180	0.000110992	0.000111679
		0.9816	7011	6	7005	12	7017	0.00171013	0.00170092		1	180.99	0.0100448	180.98	0.0200896	181	0.000110992	0.000111679
		0.9815	7015	6	7009	12	7021	0.00170916	0.00170092		1	181.99	0.0101003	181.98	0.0202006	182	0.000110993	0.000111679
		0.9814	7016	6	7010	12	7022	0.00170891	0.00170092		1	182.99	0.0101558	182.98	0.0203117	183	0.000110993	0.000111679
		0.9812	7020	6	7014	12	7026	0.00170794	0.00170092		1	183.99	0.0102114	183.98	0.0204227	184	0.000110993	0.000111679
		0.9811	7023	6	7017	12	7029	0.00170721	0.00170092		1	184.99	0.0102669	184.979	0.0205338	185	0.000110993	0.000111679
		0.981	7024	6	7018	12	7030	0.00170697	0.00170092		1	185.99	0.0103224	185.979	0.0206448	186	0.000110994	0.000111679
		0.9809	7030	6	7024	12	7036	0.00170551	0.00170092		1	186.99	0.0103779	186.979	0.0207559	187	0.000110994	0.000111679
		0.9807	7031	6	7025	12	7037	0.00170527	0.00170092		1	187.99	0.0104335	187.979	0.0208669	188	0.000110994	0.000111679
		0.9806	7033	6	7027	12	7039	0.00170479	0.00170092		1	188.99	0.010489	188.979	0.020978	189	0.000110995	0.000111679
		0.9805	7034	6	7028	12	7040	0.00170455	0.00170092		1	189.989	0.0105445	189.979	0.021089	190	0.000110995	0.000111679
		0.9804	7035	6	7029	12	7041	0.0017043	0.00170092		1	190.989	0.0106	190.979	0.0212001	191	0.000110995	0.000111679
		0.9803	7042	6	7036	12	7048	0.00170261	0.00170092		1	191.989	0.0106556	191.979	0.0213111	192	0.000110995	0.000111679
		0.9802	7043	6	7037	12	7049	0.00170237	0.00170092		1	192.989	0.0107111	192.979	0.0214222	193	0.000110996	0.000111679
		0.9801	7045	6	7039	12	7051	0.00170189	0.00170092		1	193.989	0.0107666	193.978	0.0215332	194	0.000110996	0.000111679
		0.98	7047	6	7041	12	7053	0.0017014	0.00170092		1	194.989	0.0108221	194.978	0.0216443	195	0.000110996	0.000111679
		0.9799	7049	6	7043	12	7055	0.00170092	0.00170092		1	195.989	0.0108777	195.978	0.0217553	196	0.000110997	0.000111679
		0.9796	7056	7	7049	14	7063	0.00198216	0.0019674		1	196.989	0.0109332	196.978	0.0218664	197	0.000110997	0.000111679
		0.9794	7057	7	7050	14	7064	0.00198188	0.0019674		1	197.989	0.0109887	197.978	0.0219774	198	0.000110997	0.000111679
		0.9793	7059	7	7052	14	7066	0.00198132	0.0019674		1	198.989	0.0110442	198.978	0.0220885	199	0.000110997	0.000111679
		0.9792	7063	7	7056	14	7070	0.0019802	0.0019674		1	199.989	0.0110998	199.978	0.0221996	200	0.000110998	0.000111679
		0.9791	7066	7	7059	14	7073	0.00197936	0.0019674		1	200.989	0.0111553	200.978	0.0223106	201	0.000110998	0.000111679
		0.979	7069	7	7062	14	7076	0.00197852	0.0019674		1	201.989	0.0112108	201.978	0.0224217	202	0.000110998	0.000111679
		0.9789	7072	7	7065	14	7079	0.00197768	0.0019674		1	202.989	0.0112664	202.977	0.0225327	203	0.000110999	0.000111679
		0.9788	7074	7	7067	14	7081	0.00197712	0.0019674		1	203.989	0.0113219	203.977	0.0226438	204	0.000110999	0.000111679
		0.9787	7077	7	7070	14	7084	0.00197628	0.0019674		1	204.989	0.0113774	204.977	0.0227548	205	0.000110999	0.000111679
		0.9786	7079	7	7072	14	7086	0.00197573	0.0019674		1	205.989	0.0114329	205.977	0.0228659	206	0.000111	0.000111679
		0.9785	7082	7	7075	14	7089	0.00197489	0.0019674		1	206.989	0.0114885	206.977	0.022977	207	0.000111	0.000111679
		0.9784	7084	7	7077	14	7091	0.00197433	0.0019674		1	207.988	0.011544	207.977	0.023088	208	0.000111	0.000111679
		0.9783	7085	7	7078	14	7092	0.00197406	0.0019674		1	208.988	0.0115995	208.977	0.0231991	209	0.000111	0.000111679
		0.9782	7088	7	7081	14	7095	0.00197322	0.0019674		1	209.988	0.0116551	209.977	0.0233101	210	0.000111001	0.000111679
		0.9781	7089	7	7082	14	7096	0.00197294	0.0019674		1	210.988	0.0117106	210.977	0.0234212	211	0.000111001	0.000111679
		0.978	7090	7	7083	14	7097	0.00197266	0.0019674		1	211.988	0.0117661	211.976	0.0235323	212	0.000111001	0.000111679
		0.9779	7092	7	7085	14	7099	0.00197211	0.0019674		1	212.988	0.0118217	212.976	0.0236433	213	0.000111002	0.000111679
		0.9777	7096	7	7089	14	7103	0.001971	0.0019674		1	213.988	0.0118772	213.976	0.0237544	214	0.000111002	0.000111679
		0.9776	7097	7	7090	14	7104	0.00197072	0.0019674		1	214.988	0.0119327	214.976	0.0238655	215	0.000111002	0.000111679
		0.9775	7102	7	7095	14	7109	0.00196933	0.0019674		1	215.988	0.0119883	215.976	0.0239765	216	0.000111002	0.000111679
		0.9774	7103	7	7096	14	7110	0.00196906	0.0019674		1	216.988	0.0120438	216.976	0.0240876	217	0.000111003	0.000111679
		0.9773	7104	7	7097	14	7111	0.00196878	0.0019674		1	217.988	0.0120993	217.976	0.0241986	218	0.000111003	0.000111679
		0.9772	7105	7	7098	14	7112	0.0019685	0.0019674		1	218.988	0.0121549	218.976	0.0243097	219	0.000111003	0.000111679
		0.9771	7106	7	7099	14	7113	0.00196823	0.0019674		1	219.988	0.0122104	219.976	0.0244208	220	0.000111004	0.000111679
		0.977	7108	7	7101	14	7115	0.00196767	0.0019674		1	220.988	0.0122659	220.975	0.0245319	221	0.000111004	0.000111679
		0.9769	7109	7	7102	14	7116	0.0019674	0.0019674		1	221.988	0.0123215	221.975	0.0246429	222	0.000111004	0.000111679
		0.9768	7113	8	7105	16	7121	0.00224688	0.00221883		1	222.988	0.012377	222.975	0.024754	223	0.000111004	0.000111679
		0.9767	7115	8	7107	16	7123	0.00224624	0.00221883		1	223.988	0.0124325	223.975	0.0248651	224	0.000111005	0.000111679
		0.9766	7117	8	7109	16	7125	0.00224561	0.00221883		1	224.988	0.0124881	224.975	0.0249761	225	0.000111005	0.000111679
		0.9765	7119	8	7111	16	7127	0.00224498	0.00221883		1	225.987	0.0125436	225.975	0.0250872	226	0.000111005	0.000111679
		0.9764	7121	8	7113	16	7129	0.00224435	0.00221883		1	226.987	0.0125991	226.975	0.0251983	227	0.000111006	0.000111679
		0.9763	7122	8	7114	16	7130	0.00224404	0.00221883		1	227.987	0.0126547	227.975	0.0253093	228	0.000111006	0.000111679
		0.9762	7125	8	7117	16	7133	0.0022431	0.00221883		1	228.987	0.0127102	228.975	0.0254204	229	0.000111006	0.000111679
		0.9761	7128	8	7120	16	7136	0.00224215	0.00221883		1	229.987	0.0127657	229.974	0.0255315	230	0.000111006	0.000111679
		0.976	7131	8	7123	16	7139	0.00224121	0.00221883		1	230.987	0.0128213	230.974	0.0256426	231	0.000111007	0.000111679
		0.9759	7132	8	7124	16	7140	0.0022409	0.00221883		1	231.987	0.0128768	231.974	0.0257536	232	0.000111007	0.000111679
		0.9758	7134	8	7126	16	7142	0.00224027	0.00221883		1	232.987	0.0129324	232.974	0.0258647	233	0.000111007	0.000111679
		0.9757	7135	8	7127	16	7143	0.00223996	0.00221883		1	233.987	0.0129879	233.974	0.0259758	234	0.000111008	0.000111679
		0.9756	7138	8	7130	16	7146	0.00223901	0.00221883		1	234.987	0.0130434	234.974	0.0260869	235	0.000111008	0.000111679
		0.9755	7141	8	7133	16	7149	0.00223808	0.00221883		1	235.987	0.013099	235.974	0.0261979	236	0.000111008	0.000111679
		0.9754	7142	8	7134	16	7150	0.00223776	0.00221883		1	236.987	0.0131545	236.974	0.026309	237	0.000111008	0.000111679
		0.9753	7144	8	7136	16	7152	0.00223714	0.00221883		1	237.987	0.01321	237.974	0.0264201	238	0.000111009	0.000111679
		0.9752	7147	8	7139	16	7155	0.0022362	0.00221883		1	238.987	0.0132656	238.973	0.0265312	239	0.000111009	0.000111679
		0.9749	7149	8	7141	16	7157	0.00223557	0.00221883		1	239.987	0.0133211	239.973	0.0266422	240	0.000111009	0.000111679
		0.9748	7150	8	7142	16	7158	0.00223526	0.00221883		1	240.987	0.0133767	240.973	0.0267533	241	0.00011101	0.000111679
		0.9747	7153	8	7145	16	7161	0.00223432	0.00221883		1	241.987	0.0134322	241.973	0.0268644	242	0.00011101	0.000111679
		0.9746	7154	8	7146	16	7162	0.00223401	0.00221883		1	242.987	0.0134877	242.973	0.0269755	243	0.00011101	0.000111679
		0.9744	7157	8	7149	16	7165	0.00223308	0.00221883		1	243.986	0.0135433	243.973	0.0270866	244	0.000111011	0.000111679
		0.9743	7162	8	7154	16	7170	0.00223152	0.00221883		1	244.986	0.0135988	244.973	0.0271976	245	0.000111011	0.000111679
		0.9742	7163	8	7155	16	7171	0.00223121	0.00221883		1	245.986	0.0136544	245.973	0.0273087	246	0.000111011	0.000111679
		0.974	7167	8	7159	16	7175	0.00222997	0.00221883		1	246.986	0.0137099	246.973	0.0274198	247	0.000111011	0.000111679
		0.9738	7170	8	7162	16	7178	0.00222903	0.00221883		1	247.986	0.0137654	247.972	0.0275309	248	0.000111012	0.000111679
		0.9737	7171	8	7163	16	7179	0.00222872	0.00221883		1	248.986	0.013821	248.972	0.027642	249	0.000111012	0.000111679
		0.9735	7177	8	7169	16	7185	0.00222686	0.00221883		1	249.986	0.0138765	249.972	0.0277531	250	0.000111012	0.000111679
		0.9734	7179	8	7171	16	7187	0.00222624	0.00221883		1	250.986	0.0139321	250.972	0.0278642	251	0.000111013	0.000111679
		0.9733	7182	8	7174	16	7190	0.00222531	0.00221883		1	251.986	0.0139876	251.972	0.0279752	252	0.000111013	0.000111679
		0.9731	7184	8	7176	16	7192	0.00222469	0.00221883		1	252.986	0.0140432	252.972	0.0280863	253	0.000111013	0.000111679
		0.973	7185	8	7177	16	7193	0.00222438	0.00221883		1	253.986	0.0140987	253.972	0.0281974	254	0.000111013	0.000111679
		0.9729	7187	8	7179	16	7195	0.00222377	0.00221883		1	254.986	0.0141542	254.972	0.0283085	255	0.000111014	0.000111679
		0.9728	7188	8	7180	16	7196	0.00222346	0.00221883		1	255.986	0.0142098	255.972	0.0284196	256	0.000111014	0.000111679
		0.9727	7189	8	7181	16	7197	0.00222315	0.00221883		1	256.986	0.0142653	256.971	0.0285307	257	0.000111014	0.000111679
		0.9726	7195	8	7187	16	7203	0.0022213	0.00221883		1	257.986	0.0143209	257.971	0.0286418	258	0.000111015	0.000111679
		0.9725	7197	8	7189	16	7205	0.00222068	0.00221883		1	258.986	0.0143764	258.971	0.0287529	259	0.000111015	0.000111679
		0.9723	7199	8	7191	16	7207	0.00222006	0.00221883		1	259.986	0.014432	259.971	0.0288639	260	0.000111015	0.000111679
		0.9722	7200	8	7192	16	7208	0.00221976	0.00221883		1	260.986	0.0144875	260.971	0.028975	261	0.000111015	0.000111679
		0.9721	7201	8	7193	16	7209	0.00221945	0.00221883		1	261.985	0.0145431	261.971	0.0290861	262	0.000111016	0.000111679
		0.972	7203	8	7195	16	7211	0.00221883	0.00221883		1	262.985	0.0145986	262.971	0.0291972	263	0.000111016	0.000111679
		0.9718	7203	9	7194	18	7212	0.00249584	0.00247457		1	263.985	0.0146542	263.971	0.0293083	264	0.000111016	0.000111679
		0.9717	7204	9	7195	18	7213	0.00249549	0.00247457		1	264.985	0.0147097	264.971	0.0294194	265	0.000111017	0.000111679
		0.9716	7205	9	7196	18	7214	0.00249515	0.00247457		1	265.985	0.0147652	265.97	0.0295305	266	0.000111017	0.000111679
		0.9715	7208	9	7199	18	7217	0.00249411	0.00247457		1	266.985	0.0148208	266.97	0.0296416	267	0.000111017	0.000111679
		0.9713	7210	9	7201	18	7219	0.00249342	0.00247457		1	267.985	0.0148763	267.97	0.0297527	268	0.000111017	0.000111679
		0.9711	7211	9	7202	18	7220	0.00249307	0.00247457		1	268.985	0.0149319	268.97	0.0298638	269	0.000111018	0.000111679
		0.9709	7212	9	7203	18	7221	0.00249273	0.00247457		1	269.985	0.0149874	269.97	0.0299749	270	0.000111018	0.000111679
		0.9708	7214	9	7205	18	7223	0.00249204	0.00247457		1	270.985	0.015043	270.97	0.030086	271	0.000111018	0.000111679
		0.9705	7215	9	7206	18	7224	0.00249169	0.00247457		1	271.985	0.0150985	271.97	0.0301971	272	0.000111019	0.000111679
		0.9703	7216	9	7207	18	7225	0.00249135	0.00247457		1	272.985	0.0151541	272.97	0.0303082	273	0.000111019	0.000111679
		0.9702	7217	9	7208	18	7226	0.002491	0.00247457		1	273.985	0.0152096	273.97	0.0304193	274	0.000111019	0.000111679
		0.9701	7220	9	7211	18	7229	0.00248997	0.00247457		1	274.985	0.0152652	274.969	0.0305304	275	0.00011102	0.000111679
		0.97	7221	9	7212	18	7230	0.00248963	0.00247457		1	275.985	0.0153207	275.969	0.0306415	276	0.00011102	0.000111679
		0.9699	7222	9	7213	18	7231	0.00248928	0.00247457		1	276.985	0.0153763	276.969	0.0307526	277	0.00011102	0.000111679
		0.9697	7223	9	7214	18	7232	0.00248894	0.00247457		1	277.985	0.0154318	277.969	0.0308637	278	0.00011102	0.000111679
		0.9696	7224	9	7215	18	7233	0.00248859	0.00247457		1	278.985	0.0154874	278.969	0.0309748	279	0.000111021	0.000111679
		0.9695	7226	9	7217	18	7235	0.00248791	0.00247457		1	279.984	0.0155429	279.969	0.0310859	280	0.000111021	0.000111679
		0.9694	7227	9	7218	18	7236	0.00248756	0.00247457		1	280.984	0.0155985	280.969	0.031197	281	0.000111021	0.000111679
		0.9693	7228	9	7219	18	7237	0.00248722	0.00247457		1	281.984	0.015654	281.969	0.0313081	282	0.000111022	0.000111679
		0.9692	7230	9	7221	18	7239	0.00248653	0.00247457		1	282.984	0.0157096	282.969	0.0314192	283	0.000111022	0.000111679
		0.9691	7232	9	7223	18	7241	0.00248584	0.00247457		1	283.984	0.0157651	283.968	0.0315303	284	0.000111022	0.000111679
		0.9689	7234	9	7225	18	7243	0.00248516	0.00247457		1	284.984	0.0158207	284.968	0.0316414	285	0.000111022	0.000111679
		0.9687	7235	9	7226	18	7244	0.00248482	0.00247457		1	285.984	0.0158762	285.968	0.0317525	286	0.000111023	0.000111679
		0.9686	7238	9	7229	18	7247	0.00248379	0.00247457		1	286.984	0.0159318	286.968	0.0318636	287	0.000111023	0.000111679
		0.9685	7239	9	7230	18	7248	0.00248344	0.00247457		1	287.984	0.0159874	287.968	0.0319747	288	0.000111023	0.000111679
		0.9684	7240	9	7231	18	7249	0.0024831	0.00247457		1	288.984	0.0160429	288.968	0.0320858	289	0.000111024	0.000111679
		0.9683	7242	9	7233	18	7251	0.00248242	0.00247457		1	289.984	0.0160985	289.968	0.0321969	290	0.000111024	0.000111679
		0.968	7245	9	7236	18	7254	0.00248139	0.00247457		1	290.984	0.016154	290.968	0.032308	291	0.000111024	0.000111679
		0.9679	7247	9	7238	18	7256	0.00248071	0.00247457		1	291.984	0.0162096	291.968	0.0324191	292	0.000111024	0.000111679
		0.9677	7249	9	7240	18	7258	0.00248002	0.00247457		1	292.984	0.0162651	292.967	0.0325302	293	0.000111025	0.000111679
		0.9675	7251	9	7242	18	7260	0.00247934	0.00247457		1	293.984	0.0163207	293.967	0.0326414	294	0.000111025	0.000111679
		0.9674	7255	9	7246	18	7264	0.00247797	0.00247457		1	294.984	0.0163762	294.967	0.0327525	295	0.000111025	0.000111679
		0.967	7256	9	7247	18	7265	0.00247763	0.00247457		1	295.984	0.0164318	295.967	0.0328636	296	0.000111026	0.000111679
		0.9669	7260	9	7251	18	7269	0.00247627	0.00247457		1	296.984	0.0164873	296.967	0.0329747	297	0.000111026	0.000111679
		0.9668	7262	9	7253	18	7271	0.00247559	0.00247457		1	297.983	0.0165429	297.967	0.0330858	298	0.000111026	0.000111679
		0.9667	7263	9	7254	18	7272	0.00247525	0.00247457		1	298.983	0.0165985	298.967	0.0331969	299	0.000111026	0.000111679
		0.9666	7265	9	7256	18	7274	0.00247457	0.00247457		1	299.983	0.016654	299.967	0.033308	300	0.000111027	0.000111679
		0.9665	7265	10	7255	20	7275	0.00274914	0.00272442		1	300.983	0.0167096	300.967	0.0334191	301	0.000111027	0.000111679
		0.9663	7269	10	7259	20	7279	0.00274763	0.00272442		1	301.983	0.0167651	301.966	0.0335303	302	0.000111027	0.000111679
		0.9659	7271	10	7261	20	7281	0.00274688	0.00272442		1	302.983	0.0168207	302.966	0.0336414	303	0.000111028	0.000111679
		0.9658	7273	10	7263	20	7283	0.00274612	0.00272442		1	303.983	0.0168762	303.966	0.0337525	304	0.000111028	0.000111679
		0.9657	7274	10	7264	20	7284	0.00274574	0.00272442		1	304.983	0.0169318	304.966	0.0338636	305	0.000111028	0.000111679
		0.9655	7275	10	7265	20	7285	0.00274537	0.00272442		1	305.983	0.0169874	305.966	0.0339747	306	0.000111029	0.000111679
		0.9654	7276	10	7266	20	7286	0.00274499	0.00272442		1	306.983	0.0170429	306.966	0.0340858	307	0.000111029	0.000111679
		0.9653	7277	10	7267	20	7287	0.00274461	0.00272442		1	307.983	0.0170985	307.966	0.034197	308	0.000111029	0.000111679
		0.9652	7280	10	7270	20	7290	0.00274348	0.00272442		1	308.983	0.017154	308.966	0.0343081	309	0.000111029	0.000111679
		0.9651	7282	10	7272	20	7292	0.00274273	0.00272442		1	309.983	0.0172096	309.966	0.0344192	310	0.00011103	0.000111679
		0.965	7283	10	7273	20	7293	0.00274236	0.00272442		1	310.983	0.0172652	310.965	0.0345303	311	0.00011103	0.000111679
		0.9648	7284	10	7274	20	7294	0.00274198	0.00272442		1	311.983	0.0173207	311.965	0.0346414	312	0.00011103	0.000111679
		0.9647	7286	10	7276	20	7296	0.00274123	0.00272442		1	312.983	0.0173763	312.965	0.0347526	313	0.000111031	0.000111679
		0.9645	7288	10	7278	20	7298	0.00274048	0.00272442		1	313.983	0.0174318	313.965	0.0348637	314	0.000111031	0.000111679
		0.9644	7291	10	7281	20	7301	0.00273935	0.00272442		1	314.983	0.0174874	314.965	0.0349748	315	0.000111031	0.000111679
		0.9643	7292	10	7282	20	7302	0.00273898	0.00272442		1	315.982	0.017543	315.965	0.0350859	316	0.000111031	0.000111679
		0.9641	7296	10	7286	20	7306	0.00273748	0.00272442		1	316.982	0.0175985	316.965	0.035197	317	0.000111032	0.000111679
		0.9639	7298	10	7288	20	7308	0.00273673	0.00272442		1	317.982	0.0176541	317.965	0.0353082	318	0.000111032	0.000111679
		0.9638	7300	10	7290	20	7310	0.00273598	0.00272442		1	318.982	0.0177096	318.965	0.0354193	319	0.000111032	0.000111679
		0.9637	7301	10	7291	20	7311	0.0027356	0.00272442		1	319.982	0.0177652	319.964	0.0355304	320	0.000111033	0.000111679
		0.9636	7302	10	7292	20	7312	0.00273523	0.00272442		1	320.982	0.0178208	320.964	0.0356415	321	0.000111033	0.000111679
		0.9635	7304	10	7294	20	7314	0.00273448	0.00272442		1	321.982	0.0178763	321.964	0.0357527	322	0.000111033	0.000111679
		0.9634	7307	10	7297	20	7317	0.00273336	0.00272442		1	322.982	0.0179319	322.964	0.0358638	323	0.000111033	0.000111679
		0.9633	7308	10	7298	20	7318	0.00273299	0.00272442		1	323.982	0.0179875	323.964	0.0359749	324	0.000111034	0.000111679
		0.9632	7311	10	7301	20	7321	0.00273187	0.00272442		1	324.982	0.018043	324.964	0.0360861	325	0.000111034	0.000111679
		0.9629	7314	10	7304	20	7324	0.00273075	0.00272442		1	325.982	0.0180986	325.964	0.0361972	326	0.000111034	0.000111679
		0.9628	7315	10	7305	20	7325	0.00273038	0.00272442		1	326.982	0.0181542	326.964	0.0363083	327	0.000111035	0.000111679
		0.9626	7317	10	7307	20	7327	0.00272963	0.00272442		1	327.982	0.0182097	327.964	0.0364194	328	0.000111035	0.000111679
		0.9624	7318	10	7308	20	7328	0.00272926	0.00272442		1	328.982	0.0182653	328.963	0.0365306	329	0.000111035	0.000111679
		0.9623	7322	10	7312	20	7332	0.00272777	0.00272442		1	329.982	0.0183209	329.963	0.0366417	330	0.000111035	0.000111679
		0.9622	7324	10	7314	20	7334	0.00272702	0.00272442		1	330.982	0.0183764	330.963	0.0367528	331	0.000111036	0.000111679
		0.962	7328	10	7318	20	7338	0.00272554	0.00272442		1	331.982	0.018432	331.963	0.036864	332	0.000111036	0.000111679
		0.9619	7329	10	7319	20	7339	0.00272517	0.00272442		1	332.982	0.0184875	332.963	0.0369751	333	0.000111036	0.000111679
		0.9617	7330	10	7320	20	7340	0.0027248	0.00272442		1	333.981	0.0185431	333.963	0.0370862	334	0.000111037	0.000111679
		0.9616	7331	10	7321	20	7341	0.00272442	0.00272442		1	334.981	0.0185987	334.963	0.0371974	335	0.000111037	0.000111679
		0.9614	7331	11	7320	22	7342	0.00299646	0.0029936		1	335.981	0.0186542	335.963	0.0373085	336	0.000111037	0.000111679
		0.9613	7333	11	7322	22	7344	0.00299564	0.0029936		1	336.981	0.0187098	336.963	0.0374196	337	0.000111037	0.000111679
		0.9611	7335	11	7324	22	7346	0.00299483	0.0029936		1	337.981	0.0187654	337.962	0.0375308	338	0.000111038	0.000111679
		0.961	7337	11	7326	22	7348	0.00299401	0.0029936		1	338.981	0.018821	338.962	0.0376419	339	0.000111038	0.000111679
		0.9609	7338	11	7327	22	7349	0.0029936	0.0029936		1	339.981	0.0188765	339.962	0.037753	340	0.000111038	0.000111679
		0.9607	7338	12	7326	24	7350	0.00326531	0.00325203		1	340.981	0.0189321	340.962	0.0378642	341	0.000111039	0.000111679
		0.9606	7339	12	7327	24	7351	0.00326486	0.00325203		1	341.981	0.0189877	341.962	0.0379753	342	0.000111039	0.000111679
		0.9605	7340	12	7328	24	7352	0.00326442	0.00325203		1	342.981	0.0190432	342.962	0.0380865	343	0.000111039	0.000111679
		0.9603	7341	12	7329	24	7353	0.00326397	0.00325203		1	343.981	0.0190988	343.962	0.0381976	344	0.00011104	0.000111679
		0.9601	7342	12	7330	24	7354	0.00326353	0.00325203		1	344.981	0.0191544	344.962	0.0383087	345	0.00011104	0.000111679
		0.96	7344	12	7332	24	7356	0.00326264	0.00325203		1	345.981	0.0192099	345.962	0.0384199	346	0.00011104	0.000111679
		0.9599	7345	12	7333	24	7357	0.0032622	0.00325203		1	346.981	0.0192655	346.961	0.038531	347	0.00011104	0.000111679
		0.9598	7347	12	7335	24	7359	0.00326131	0.00325203		1	347.981	0.0193211	347.961	0.0386422	348	0.000111041	0.000111679
		0.9596	7348	12	7336	24	7360	0.00326087	0.00325203		1	348.981	0.0193766	348.961	0.0387533	349	0.000111041	0.000111679
		0.9595	7349	12	7337	24	7361	0.00326043	0.00325203		1	349.981	0.0194322	349.961	0.0388644	350	0.000111041	0.000111679
		0.9593	7350	12	7338	24	7362	0.00325998	0.00325203		1	350.981	0.0194878	350.961	0.0389756	351	0.000111042	0.000111679
		0.9592	7352	12	7340	24	7364	0.0032591	0.00325203		1	351.98	0.0195434	351.961	0.0390867	352	0.000111042	0.000111679
		0.9591	7353	12	7341	24	7365	0.00325866	0.00325203		1	352.98	0.0195989	352.961	0.0391979	353	0.000111042	0.000111679
		0.959	7355	12	7343	24	7367	0.00325777	0.00325203		1	353.98	0.0196545	353.961	0.039309	354	0.000111042	0.000111679
		0.9589	7357	12	7345	24	7369	0.00325689	0.00325203		1	354.98	0.0197101	354.961	0.0394202	355	0.000111043	0.000111679
		0.9587	7359	12	7347	24	7371	0.003256	0.00325203		1	355.98	0.0197657	355.96	0.0395313	356	0.000111043	0.000111679
		0.9586	7360	12	7348	24	7372	0.00325556	0.00325203		1	356.98	0.0198212	356.96	0.0396425	357	0.000111043	0.000111679
		0.9585	7363	12	7351	24	7375	0.00325424	0.00325203		1	357.98	0.0198768	357.96	0.0397536	358	0.000111044	0.000111679
		0.9581	7364	12	7352	24	7376	0.0032538	0.00325203		1	358.98	0.0199324	358.96	0.0398648	359	0.000111044	0.000111679
		0.958	7365	12	7353	24	7377	0.00325336	0.00325203		1	359.98	0.0199879	359.96	0.0399759	360	0.000111044	0.000111679
		0.9578	7367	12	7355	24	7379	0.00325247	0.00325203		1	360.98	0.0200435	360.96	0.040087	361	0.000111044	0.000111679
		0.9576	7368	12	7356	24	7380	0.00325203	0.00325203		1	361.98	0.0200991	361.96	0.0401982	362	0.000111045	0.000111679
		0.9575	7368	13	7355	26	7381	0.00352256	0.00347966		1	362.98	0.0201547	362.96	0.0403093	363	0.000111045	0.000111679
		0.9573	7369	13	7356	26	7382	0.00352208	0.00347966		1	363.98	0.0202102	363.96	0.0404205	364	0.000111045	0.000111679
		0.9572	7371	13	7358	26	7384	0.00352113	0.00347966		1	364.98	0.0202658	364.959	0.0405316	365	0.000111046	0.000111679
		0.9571	7373	13	7360	26	7386	0.00352017	0.00347966		1	365.98	0.0203214	365.959	0.0406428	366	0.000111046	0.000111679
		0.9569	7375	13	7362	26	7388	0.00351922	0.00347966		1	366.98	0.020377	366.959	0.040754	367	0.000111046	0.000111679
		0.9565	7376	13	7363	26	7389	0.00351874	0.00347966		1	367.98	0.0204326	367.959	0.0408651	368	0.000111046	0.000111679
		0.9564	7378	13	7365	26	7391	0.00351779	0.00347966		1	368.98	0.0204881	368.959	0.0409763	369	0.000111047	0.000111679
		0.9563	7379	13	7366	26	7392	0.00351732	0.00347966		1	369.979	0.0205437	369.959	0.0410874	370	0.000111047	0.000111679
		0.9562	7381	13	7368	26	7394	0.00351636	0.00347966		1	370.979	0.0205993	370.959	0.0411986	371	0.000111047	0.000111679
		0.9559	7383	13	7370	26	7396	0.00351541	0.00347966		1	371.979	0.0206549	371.959	0.0413097	372	0.000111048	0.000111679
		0.9558	7385	13	7372	26	7398	0.00351446	0.00347966		1	372.979	0.0207104	372.959	0.0414209	373	0.000111048	0.000111679
		0.9556	7387	13	7374	26	7400	0.00351351	0.00347966		1	373.979	0.020766	373.958	0.041532	374	0.000111048	0.000111679
		0.9554	7389	13	7376	26	7402	0.00351256	0.00347966		1	374.979	0.0208216	374.958	0.0416432	375	0.000111049	0.000111679
		0.9553	7391	13	7378	26	7404	0.00351162	0.00347966		1	375.979	0.0208772	375.958	0.0417544	376	0.000111049	0.000111679
		0.9551	7392	13	7379	26	7405	0.00351114	0.00347966		1	376.979	0.0209328	376.958	0.0418655	377	0.000111049	0.000111679
		0.955	7393	13	7380	26	7406	0.00351067	0.00347966		1	377.979	0.0209883	377.958	0.0419767	378	0.000111049	0.000111679
		0.9549	7394	13	7381	26	7407	0.00351019	0.00347966		1	378.979	0.0210439	378.958	0.0420878	379	0.00011105	0.000111679
		0.9548	7395	13	7382	26	7408	0.00350972	0.00347966		1	379.979	0.0210995	379.958	0.042199	380	0.00011105	0.000111679
		0.9547	7397	13	7384	26	7410	0.00350877	0.00347966		1	380.979	0.0211551	380.958	0.0423101	381	0.00011105	0.000111679
		0.9543	7398	13	7385	26	7411	0.0035083	0.00347966		1	381.979	0.0212107	381.958	0.0424213	382	0.000111051	0.000111679
		0.9541	7400	13	7387	26	7413	0.00350735	0.00347966		1	382.979	0.0212662	382.957	0.0425325	383	0.000111051	0.000111679
		0.954	7401	13	7388	26	7414	0.00350688	0.00347966		1	383.979	0.0213218	383.957	0.0426436	384	0.000111051	0.000111679
		0.9539	7402	13	7389	26	7415	0.00350641	0.00347966		1	384.979	0.0213774	384.957	0.0427548	385	0.000111051	0.000111679
		0.9538	7405	13	7392	26	7418	0.00350499	0.00347966		1	385.979	0.021433	385.957	0.042866	386	0.000111052	0.000111679
		0.9537	7406	13	7393	26	7419	0.00350452	0.00347966		1	386.979	0.0214886	386.957	0.0429771	387	0.000111052	0.000111679
		0.9536	7407	13	7394	26	7420	0.00350404	0.00347966		1	387.978	0.0215441	387.957	0.0430883	388	0.000111052	0.000111679
		0.9535	7408	13	7395	26	7421	0.00350357	0.00347966		1	388.978	0.0215997	388.957	0.0431995	389	0.000111053	0.000111679
		0.9534	7409	13	7396	26	7422	0.0035031	0.00347966		1	389.978	0.0216553	389.957	0.0433106	390	0.000111053	0.000111679
		0.9533	7410	13	7397	26	7423	0.00350263	0.00347966		1	390.978	0.0217109	390.957	0.0434218	391	0.000111053	0.000111679
		0.9532	7412	13	7399	26	7425	0.00350168	0.00347966		1	391.978	0.0217665	391.956	0.043533	392	0.000111053	0.000111679
		0.9529	7413	13	7400	26	7426	0.00350121	0.00347966		1	392.978	0.0218221	392.956	0.0436441	393	0.000111054	0.000111679
		0.9528	7414	13	7401	26	7427	0.00350074	0.00347966		1	393.978	0.0218776	393.956	0.0437553	394	0.000111054	0.000111679
		0.9526	7415	13	7402	26	7428	0.00350027	0.00347966		1	394.978	0.0219332	394.956	0.0438665	395	0.000111054	0.000111679
		0.9525	7416	13	7403	26	7429	0.0034998	0.00347966		1	395.978	0.0219888	395.956	0.0439776	396	0.000111055	0.000111679
		0.9524	7418	13	7405	26	7431	0.00349886	0.00347966		1	396.978	0.0220444	396.956	0.0440888	397	0.000111055	0.000111679
		0.9523	7422	13	7409	26	7435	0.00349697	0.00347966		1	397.978	0.0221	397.956	0.0442	398	0.000111055	0.000111679
		0.9522	7424	13	7411	26	7437	0.00349603	0.00347966		1	398.978	0.0221556	398.956	0.0443111	399	0.000111055	0.000111679
		0.9521	7425	13	7412	26	7438	0.00349556	0.00347966		1	399.978	0.0222112	399.956	0.0444223	400	0.000111056	0.000111679
		0.952	7426	13	7413	26	7439	0.00349509	0.00347966		1	400.978	0.0222667	400.955	0.0445335	401	0.000111056	0.000111679
		0.9519	7427	13	7414	26	7440	0.00349462	0.00347966		1	401.978	0.0223223	401.955	0.0446447	402	0.000111056	0.000111679
		0.9516	7428	13	7415	26	7441	0.00349415	0.00347966		1	402.978	0.0223779	402.955	0.0447558	403	0.000111057	0.000111679
		0.9515	7429	13	7416	26	7442	0.00349368	0.00347966		1	403.978	0.0224335	403.955	0.044867	404	0.000111057	0.000111679
		0.9514	7431	13	7418	26	7444	0.00349275	0.00347966		1	404.978	0.0224891	404.955	0.0449782	405	0.000111057	0.000111679
		0.951	7432	13	7419	26	7445	0.00349228	0.00347966		1	405.977	0.0225447	405.955	0.0450893	406	0.000111058	0.000111679
		0.9508	7433	13	7420	26	7446	0.00349181	0.00347966		1	406.977	0.0226003	406.955	0.0452005	407	0.000111058	0.000111679
		0.9507	7437	13	7424	26	7450	0.00348993	0.00347966		1	407.977	0.0226558	407.955	0.0453117	408	0.000111058	0.000111679
		0.9506	7438	13	7425	26	7451	0.00348946	0.00347966		1	408.977	0.0227114	408.955	0.0454229	409	0.000111058	0.000111679
		0.9505	7439	13	7426	26	7452	0.003489	0.00347966		1	409.977	0.022767	409.954	0.0455341	410	0.000111059	0.000111679
		0.9501	7442	13	7429	26	7455	0.00348759	0.00347966		1	410.977	0.0228226	410.954	0.0456452	411	0.000111059	0.000111679
		0.95	7443	13	7430	26	7456	0.00348712	0.00347966		1	411.977	0.0228782	411.954	0.0457564	412	0.000111059	0.000111679
		0.9499	7444	13	7431	26	7457	0.00348666	0.00347966		1	412.977	0.0229338	412.954	0.0458676	413	0.00011106	0.000111679
		0.9496	7445	13	7432	26	7458	0.00348619	0.00347966		1	413.977	0.0229894	413.954	0.0459788	414	0.00011106	0.000111679
		0.9495	7446	13	7433	26	7459	0.00348572	0.00347966		1	414.977	0.023045	414.954	0.0460899	415	0.00011106	0.000111679
		0.9493	7447	13	7434	26	7460	0.00348525	0.00347966		1	415.977	0.0231006	415.954	0.0462011	416	0.00011106	0.000111679
		0.9491	7449	13	7436	26	7462	0.00348432	0.00347966		1	416.977	0.0231562	416.954	0.0463123	417	0.000111061	0.000111679
		0.9489	7450	13	7437	26	7463	0.00348385	0.00347966		1	417.977	0.0232117	417.954	0.0464235	418	0.000111061	0.000111679
		0.9488	7451	13	7438	26	7464	0.00348339	0.00347966		1	418.977	0.0232673	418.953	0.0465347	419	0.000111061	0.000111679
		0.9485	7452	13	7439	26	7465	0.00348292	0.00347966		1	419.977	0.0233229	419.953	0.0466459	420	0.000111062	0.000111679
		0.9484	7453	13	7440	26	7466	0.00348245	0.00347966		1	420.977	0.0233785	420.953	0.046757	421	0.000111062	0.000111679
		0.9483	7455	13	7442	26	7468	0.00348152	0.00347966		1	421.977	0.0234341	421.953	0.0468682	422	0.000111062	0.000111679
		0.9482	7457	13	7444	26	7470	0.00348059	0.00347966		1	422.977	0.0234897	422.953	0.0469794	423	0.000111062	0.000111679
		0.9481	7459	13	7446	26	7472	0.00347966	0.00347966		1	423.976	0.0235453	423.953	0.0470906	424	0.000111063	0.000111679
		0.9479	7459	14	7445	28	7473	0.00374682	0.00374482		1	424.976	0.0236009	424.953	0.0472018	425	0.000111063	0.000111679
		0.9476	7463	14	7449	28	7477	0.00374482	0.00374482		1	425.976	0.0236565	425.953	0.047313	426	0.000111063	0.000111679
		0.9474	7465	15	7450	30	7480	0.0040107	0.00400909		1	426.976	0.0237121	426.953	0.0474242	427	0.000111064	0.000111679
		0.9472	7467	15	7452	30	7482	0.00400962	0.00400909		1	427.976	0.0237677	427.952	0.0475353	428	0.000111064	0.000111679
		0.9469	7468	15	7453	30	7483	0.00400909	0.00400909		1	428.976	0.0238233	428.952	0.0476465	429	0.000111064	0.000111679
		0.9468	7469	16	7453	32	7485	0.00427522	0.0042735		1	429.976	0.0238789	429.952	0.0477577	430	0.000111064	0.000111679
		0.9467	7470	16	7454	32	7486	0.00427465	0.0042735		1	430.976	0.0239345	430.952	0.0478689	431	0.000111065	0.000111679
		0.9465	7472	16	7456	32	7488	0.0042735	0.0042735		1	431.976	0.0239901	431.952	0.0479801	432	0.000111065	0.000111679
		0.9463	7472	17	7455	34	7489	0.00453999	0.00452188		1	432.976	0.0240456	432.952	0.0480913	433	0.000111065	0.000111679
		0.9462	7473	17	7456	34	7490	0.00453939	0.00452188		1	433.976	0.0241012	433.952	0.0482025	434	0.000111066	0.000111679
		0.9458	7476	17	7459	34	7493	0.00453757	0.00452188		1	434.976	0.0241568	434.952	0.0483137	435	0.000111066	0.000111679
		0.9456	7479	17	7462	34	7496	0.00453575	0.00452188		1	435.976	0.0242124	435.952	0.0484249	436	0.000111066	0.000111679
		0.9453	7480	17	7463	34	7497	0.00453515	0.00452188		1	436.976	0.024268	436.951	0.0485361	437	0.000111067	0.000111679
		0.945	7481	17	7464	34	7498	0.00453454	0.00452188		1	437.976	0.0243236	437.951	0.0486473	438	0.000111067	0.000111679
		0.9449	7484	17	7467	34	7501	0.00453273	0.00452188		1	438.976	0.0243792	438.951	0.0487584	439	0.000111067	0.000111679
		0.9447	7485	17	7468	34	7502	0.00453212	0.00452188		1	439.976	0.0244348	439.951	0.0488696	440	0.000111067	0.000111679
		0.9444	7486	17	7469	34	7503	0.00453152	0.00452188		1	440.976	0.0244904	440.951	0.0489808	441	0.000111068	0.000111679
		0.9441	7487	17	7470	34	7504	0.00453092	0.00452188		1	441.975	0.024546	441.951	0.049092	442	0.000111068	0.000111679
		0.944	7490	17	7473	34	7507	0.00452911	0.00452188		1	442.975	0.0246016	442.951	0.0492032	443	0.000111068	0.000111679
		0.9439	7491	17	7474	34	7508	0.0045285	0.00452188		1	443.975	0.0246572	443.951	0.0493144	444	0.000111069	0.000111679
		0.9438	7493	17	7476	34	7510	0.0045273	0.00452188		1	444.975	0.0247128	444.951	0.0494256	445	0.000111069	0.000111679
		0.9436	7494	17	7477	34	7511	0.00452669	0.00452188		1	445.975	0.0247684	445.95	0.0495368	446	0.000111069	0.000111679
		0.9435	7495	17	7478	34	7512	0.00452609	0.00452188		1	446.975	0.024824	446.95	0.049648	447	0.000111069	0.000111679
		0.9434	7496	17	7479	34	7513	0.00452549	0.00452188		1	447.975	0.0248796	447.95	0.0497592	448	0.00011107	0.000111679
		0.9431	7497	17	7480	34	7514	0.00452489	0.00452188		1	448.975	0.0249352	448.95	0.0498704	449	0.00011107	0.000111679
		0.943	7499	17	7482	34	7516	0.00452368	0.00452188		1	449.975	0.0249908	449.95	0.0499816	450	0.00011107	0.000111679
		0.9429	7500	17	7483	34	7517	0.00452308	0.00452188		1	450.975	0.0250464	450.95	0.0500928	451	0.000111071	0.000111679
		0.9425	7501	17	7484	34	7518	0.00452248	0.00452188		1	451.975	0.025102	451.95	0.050204	452	0.000111071	0.000111679
		0.9424	7502	17	7485	34	7519	0.00452188	0.00452188		1	452.975	0.0251576	452.95	0.0503152	453	0.000111071	0.000111679
		0.9422	7502	18	7484	36	7520	0.00478723	0.00478533		1	453.975	0.0252132	453.95	0.0504264	454	0.000111071	0.000111679
		0.9421	7503	18	7485	36	7521	0.0047866	0.00478533		1	454.975	0.0252688	454.949	0.0505376	455	0.000111072	0.000111679
		0.942	7504	18	7486	36	7522	0.00478596	0.00478533		1	455.975	0.0253244	455.949	0.0506488	456	0.000111072	0.000111679
		0.9419	7505	18	7487	36	7523	0.00478533	0.00478533		1	456.975	0.02538	456.949	0.05076	457	0.000111072	0.000111679
		0.9416	7505	19	7486	38	7524	0.00505051	0.00501716		1	457.975	0.0254356	457.949	0.0508712	458	0.000111073	0.000111679
		0.9415	7506	19	7487	38	7525	0.00504983	0.00501716		1	458.975	0.0254912	458.949	0.0509825	459	0.000111073	0.000111679
		0.9414	7507	19	7488	38	7526	0.00504916	0.00501716		1	459.974	0.0255468	459.949	0.0510937	460	0.000111073	0.000111679
		0.941	7508	19	7489	38	7527	0.00504849	0.00501716		1	460.974	0.0256024	460.949	0.0512049	461	0.000111073	0.000111679
		0.9409	7509	19	7490	38	7528	0.00504782	0.00501716		1	461.974	0.025658	461.949	0.0513161	462	0.000111074	0.000111679
		0.9407	7511	19	7492	38	7530	0.00504648	0.00501716		1	462.974	0.0257136	462.949	0.0514273	463	0.000111074	0.000111679
		0.9405	7512	19	7493	38	7531	0.00504581	0.00501716		1	463.974	0.0257692	463.948	0.0515385	464	0.000111074	0.000111679
		0.9404	7514	19	7495	38	7533	0.00504447	0.00501716		1	464.974	0.0258249	464.948	0.0516497	465	0.000111075	0.000111679
		0.9401	7516	19	7497	38	7535	0.00504313	0.00501716		1	465.974	0.0258805	465.948	0.0517609	466	0.000111075	0.000111679
		0.94	7519	19	7500	38	7538	0.00504112	0.00501716		1	466.974	0.0259361	466.948	0.0518721	467	0.000111075	0.000111679
		0.9399	7520	19	7501	38	7539	0.00504046	0.00501716		1	467.974	0.0259917	467.948	0.0519833	468	0.000111075	0.000111679
		0.9396	7521	19	7502	38	7540	0.00503979	0.00501716		1	468.974	0.0260473	468.948	0.0520945	469	0.000111076	0.000111679
		0.9394	7523	19	7504	38	7542	0.00503845	0.00501716		1	469.974	0.0261029	469.948	0.0522058	470	0.000111076	0.000111679
		0.939	7524	19	7505	38	7543	0.00503778	0.00501716		1	470.974	0.0261585	470.948	0.052317	471	0.000111076	0.000111679
		0.9388	7526	19	7507	38	7545	0.00503645	0.00501716		1	471.974	0.0262141	471.948	0.0524282	472	0.000111077	0.000111679
		0.9386	7528	19	7509	38	7547	0.00503511	0.00501716		1	472.974	0.0262697	472.947	0.0525394	473	0.000111077	0.000111679
		0.9384	7530	19	7511	38	7549	0.00503378	0.00501716		1	473.974	0.0263253	473.947	0.0526506	474	0.000111077	0.000111679
		0.938	7533	19	7514	38	7552	0.00503178	0.00501716		1	474.974	0.0263809	474.947	0.0527618	475	0.000111078	0.000111679
		0.9378	7534	19	7515	38	7553	0.00503111	0.00501716		1	475.974	0.0264365	475.947	0.052873	476	0.000111078	0.000111679
		0.9376	7535	19	7516	38	7554	0.00503045	0.00501716		1	476.974	0.0264921	476.947	0.0529843	477	0.000111078	0.000111679
		0.9369	7536	19	7517	38	7555	0.00502978	0.00501716		1	477.973	0.0265477	477.947	0.0530955	478	0.000111078	0.000111679
		0.9365	7537	19	7518	38	7556	0.00502912	0.00501716		1	478.973	0.0266033	478.947	0.0532067	479	0.000111079	0.000111679
		0.9364	7538	19	7519	38	7557	0.00502845	0.00501716		1	479.973	0.026659	479.947	0.0533179	480	0.000111079	0.000111679
		0.9363	7539	19	7520	38	7558	0.00502779	0.00501716		1	480.973	0.0267146	480.947	0.0534291	481	0.000111079	0.000111679
		0.9362	7540	19	7521	38	7559	0.00502712	0.00501716		1	481.973	0.0267702	481.946	0.0535403	482	0.00011108	0.000111679
		0.936	7541	19	7522	38	7560	0.00502646	0.00501716		1	482.973	0.0268258	482.946	0.0536516	483	0.00011108	0.000111679
		0.9359	7543	19	7524	38	7562	0.00502513	0.00501716		1	483.973	0.0268814	483.946	0.0537628	484	0.00011108	0.000111679
		0.9356	7544	19	7525	38	7563	0.00502446	0.00501716		1	484.973	0.026937	484.946	0.053874	485	0.00011108	0.000111679
		0.9354	7545	19	7526	38	7564	0.0050238	0.00501716		1	485.973	0.0269926	485.946	0.0539852	486	0.000111081	0.000111679
		0.9353	7546	19	7527	38	7565	0.00502313	0.00501716		1	486.973	0.0270482	486.946	0.0540965	487	0.000111081	0.000111679
		0.9352	7547	19	7528	38	7566	0.00502247	0.00501716		1	487.973	0.0271038	487.946	0.0542077	488	0.000111081	0.000111679
		0.9349	7548	19	7529	38	7567	0.00502181	0.00501716		1	488.973	0.0271594	488.946	0.0543189	489	0.000111082	0.000111679
		0.9348	7550	19	7531	38	7569	0.00502048	0.00501716		1	489.973	0.0272151	489.946	0.0544301	490	0.000111082	0.000111679
		0.9346	7551	19	7532	38	7570	0.00501982	0.00501716		1	490.973	0.0272707	490.945	0.0545413	491	0.000111082	0.000111679
		0.9345	7552	19	7533	38	7571	0.00501915	0.00501716		1	491.973	0.0273263	491.945	0.0546526	492	0.000111082	0.000111679
		0.9344	7554	19	7535	38	7573	0.00501783	0.00501716		1	492.973	0.0273819	492.945	0.0547638	493	0.000111083	0.000111679
		0.9341	7555	19	7536	38	7574	0.00501716	0.00501716		1	493.973	0.0274375	493.945	0.054875	494	0.000111083	0.000111679
		0.9338	7556	20	7536	40	7576	0.00527983	0.00525624		1	494.973	0.0274931	494.945	0.0549862	495	0.000111083	0.000111679
		0.9337	7557	20	7537	40	7577	0.00527913	0.00525624		1	495.972	0.0275487	495.945	0.0550975	496	0.000111084	0.000111679
		0.9336	7558	20	7538	40	7578	0.00527844	0.00525624		1	496.972	0.0276044	496.945	0.0552087	497	0.000111084	0.000111679
		0.9333	7559	20	7539	40	7579	0.00527774	0.00525624		1	497.972	0.02766	497.945	0.0553199	498	0.000111084	0.000111679
		0.9329	7560	20	7540	40	7580	0.00527704	0.00525624		1	498.972	0.0277156	498.945	0.0554312	499	0.000111084	0.000111679
		0.9327	7561	20	7541	40	7581	0.00527635	0.00525624		1	499.972	0.0277712	499.944	0.0555424	500	0.000111085	0.000111679
		0.9326	7563	20	7543	40	7583	0.00527496	0.00525624		1	500.972	0.0278268	500.944	0.0556536	501	0.000111085	0.000111679
		0.9323	7564	20	7544	40	7584	0.00527426	0.00525624		1	501.972	0.0278824	501.944	0.0557649	502	0.000111085	0.000111679
		0.9321	7565	20	7545	40	7585	0.00527357	0.00525624		1	502.972	0.027938	502.944	0.0558761	503	0.000111086	0.000111679
		0.9318	7566	20	7546	40	7586	0.00527287	0.00525624		1	503.972	0.0279937	503.944	0.0559873	504	0.000111086	0.000111679
		0.9317	7567	20	7547	40	7587	0.00527218	0.00525624		1	504.972	0.0280493	504.944	0.0560985	505	0.000111086	0.000111679
		0.9316	7568	20	7548	40	7588	0.00527148	0.00525624		1	505.972	0.0281049	505.944	0.0562098	506	0.000111087	0.000111679
		0.9315	7570	20	7550	40	7590	0.00527009	0.00525624		1	506.972	0.0281605	506.944	0.056321	507	0.000111087	0.000111679
		0.9314	7571	20	7551	40	7591	0.0052694	0.00525624		1	507.972	0.0282161	507.944	0.0564322	508	0.000111087	0.000111679
		0.9313	7572	20	7552	40	7592	0.0052687	0.00525624		1	508.972	0.0282717	508.943	0.0565435	509	0.000111087	0.000111679
		0.9311	7573	20	7553	40	7593	0.00526801	0.00525624		1	509.972	0.0283274	509.943	0.0566547	510	0.000111088	0.000111679
		0.9304	7574	20	7554	40	7594	0.00526732	0.00525624		1	510.972	0.028383	510.943	0.056766	511	0.000111088	0.000111679
		0.9299	7575	20	7555	40	7595	0.00526662	0.00525624		1	511.972	0.0284386	511.943	0.0568772	512	0.000111088	0.000111679
		0.9295	7578	20	7558	40	7598	0.00526454	0.00525624		1	512.972	0.0284942	512.943	0.0569884	513	0.000111089	0.000111679
		0.9294	7582	20	7562	40	7602	0.00526177	0.00525624		1	513.971	0.0285498	513.943	0.0570997	514	0.000111089	0.000111679
		0.9293	7585	20	7565	40	7605	0.0052597	0.00525624		1	514.971	0.0286055	514.943	0.0572109	515	0.000111089	0.000111679
		0.9286	7586	20	7566	40	7606	0.00525901	0.00525624		1	515.971	0.0286611	515.943	0.0573221	516	0.000111089	0.000111679
		0.9283	7587	20	7567	40	7607	0.00525831	0.00525624		1	516.971	0.0287167	516.943	0.0574334	517	0.00011109	0.000111679
		0.9282	7590	20	7570	40	7610	0.00525624	0.00525624		1	517.971	0.0287723	517.942	0.0575446	518	0.00011109	0.000111679
		0.9281	7590	21	7569	42	7611	0.00551833	0.00551543		1	518.971	0.0288279	518.942	0.0576559	519	0.00011109	0.000111679
		0.928	7591	21	7570	42	7612	0.0055176	0.00551543		1	519.971	0.0288836	519.942	0.0577671	520	0.000111091	0.000111679
		0.9279	7592	21	7571	42	7613	0.00551688	0.00551543		1	520.971	0.0289392	520.942	0.0578783	521	0.000111091	0.000111679
		0.9278	7593	21	7572	42	7614	0.00551615	0.00551543		1	521.971	0.0289948	521.942	0.0579896	522	0.000111091	0.000111679
		0.9276	7594	21	7573	42	7615	0.00551543	0.00551543		1	522.971	0.0290504	522.942	0.0581008	523	0.000111091	0.000111679
		0.9272	7596	22	7574	44	7618	0.00577579	0.00569948		1	523.971	0.029106	523.942	0.0582121	524	0.000111092	0.000111679
		0.927	7600	22	7578	44	7622	0.00577276	0.00569948		1	524.971	0.0291617	524.942	0.0583233	525	0.000111092	0.000111679
		0.9269	7601	22	7579	44	7623	0.00577201	0.00569948		1	525.971	0.0292173	525.942	0.0584346	526	0.000111092	0.000111679
		0.9268	7602	22	7580	44	7624	0.00577125	0.00569948		1	526.971	0.0292729	526.941	0.0585458	527	0.000111093	0.000111679
		0.9261	7603	22	7581	44	7625	0.00577049	0.00569948		1	527.971	0.0293285	527.941	0.0586571	528	0.000111093	0.000111679
		0.926	7604	22	7582	44	7626	0.00576974	0.00569948		1	528.971	0.0293842	528.941	0.0587683	529	0.000111093	0.000111679
		0.9258	7605	22	7583	44	7627	0.00576898	0.00569948		1	529.971	0.0294398	529.941	0.0588795	530	0.000111093	0.000111679
		0.9257	7606	22	7584	44	7628	0.00576822	0.00569948		1	530.971	0.0294954	530.941	0.0589908	531	0.000111094	0.000111679
		0.9256	7608	22	7586	44	7630	0.00576671	0.00569948		1	531.97	0.029551	531.941	0.059102	532	0.000111094	0.000111679
		0.9255	7609	22	7587	44	7631	0.00576595	0.00569948		1	532.97	0.0296066	532.941	0.0592133	533	0.000111094	0.000111679
		0.9252	7610	22	7588	44	7632	0.0057652	0.00569948		1	533.97	0.0296623	533.941	0.0593245	534	0.000111095	0.000111679
		0.925	7611	22	7589	44	7633	0.00576444	0.00569948		1	534.97	0.0297179	534.941	0.0594358	535	0.000111095	0.000111679
		0.9246	7612	22	7590	44	7634	0.00576369	0.00569948		1	535.97	0.0297735	535.94	0.059547	536	0.000111095	0.000111679
		0.9244	7613	22	7591	44	7635	0.00576293	0.00569948		1	536.97	0.0298291	536.94	0.0596583	537	0.000111096	0.000111679
		0.9237	7614	22	7592	44	7636	0.00576218	0.00569948		1	537.97	0.0298848	537.94	0.0597695	538	0.000111096	0.000111679
		0.9234	7615	22	7593	44	7637	0.00576142	0.00569948		1	538.97	0.0299404	538.94	0.0598808	539	0.000111096	0.000111679
		0.9233	7616	22	7594	44	7638	0.00576067	0.00569948		1	539.97	0.029996	539.94	0.0599921	540	0.000111096	0.000111679
		0.9232	7617	22	7595	44	7639	0.00575992	0.00569948		1	540.97	0.0300517	540.94	0.0601033	541	0.000111097	0.000111679
		0.9231	7618	22	7596	44	7640	0.00575916	0.00569948		1	541.97	0.0301073	541.94	0.0602146	542	0.000111097	0.000111679
		0.9228	7619	22	7597	44	7641	0.00575841	0.00569948		1	542.97	0.0301629	542.94	0.0603258	543	0.000111097	0.000111679
		0.9226	7620	22	7598	44	7642	0.00575766	0.00569948		1	543.97	0.0302185	543.94	0.0604371	544	0.000111098	0.000111679
		0.9225	7621	22	7599	44	7643	0.0057569	0.00569948		1	544.97	0.0302742	544.939	0.0605483	545	0.000111098	0.000111679
		0.9222	7622	22	7600	44	7644	0.00575615	0.00569948		1	545.97	0.0303298	545.939	0.0606596	546	0.000111098	0.000111679
		0.9221	7625	22	7603	44	7647	0.00575389	0.00569948		1	546.97	0.0303854	546.939	0.0607708	547	0.000111098	0.000111679
		0.922	7626	22	7604	44	7648	0.00575314	0.00569948		1	547.97	0.030441	547.939	0.0608821	548	0.000111099	0.000111679
		0.9218	7627	22	7605	44	7649	0.00575239	0.00569948		1	548.97	0.0304967	548.939	0.0609934	549	0.000111099	0.000111679
		0.9215	7630	22	7608	44	7652	0.00575013	0.00569948		1	549.969	0.0305523	549.939	0.0611046	550	0.000111099	0.000111679
		0.9213	7631	22	7609	44	7653	0.00574938	0.00569948		1	550.969	0.0306079	550.939	0.0612159	551	0.0001111	0.000111679
		0.9209	7632	22	7610	44	7654	0.00574863	0.00569948		1	551.969	0.0306636	551.939	0.0613271	552	0.0001111	0.000111679
		0.9207	7633	22	7611	44	7655	0.00574788	0.00569948		1	552.969	0.0307192	552.939	0.0614384	553	0.0001111	0.000111679
		0.9206	7634	22	7612	44	7656	0.00574713	0.00569948		1	553.969	0.0307748	553.938	0.0615497	554	0.0001111	0.000111679
		0.9205	7635	22	7613	44	7657	0.00574638	0.00569948		1	554.969	0.0308305	554.938	0.0616609	555	0.000111101	0.000111679
		0.9203	7636	22	7614	44	7658	0.00574563	0.00569948		1	555.969	0.0308861	555.938	0.0617722	556	0.000111101	0.000111679
		0.9202	7637	22	7615	44	7659	0.00574488	0.00569948		1	556.969	0.0309417	556.938	0.0618834	557	0.000111101	0.000111679
		0.9197	7638	22	7616	44	7660	0.00574413	0.00569948		1	557.969	0.0309974	557.938	0.0619947	558	0.000111102	0.000111679
		0.9196	7640	22	7618	44	7662	0.00574263	0.00569948		1	558.969	0.031053	558.938	0.062106	559	0.000111102	0.000111679
		0.9195	7641	22	7619	44	7663	0.00574188	0.00569948		1	559.969	0.0311086	559.938	0.0622172	560	0.000111102	0.000111679
		0.9194	7642	22	7620	44	7664	0.00574113	0.00569948		1	560.969	0.0311642	560.938	0.0623285	561	0.000111102	0.000111679
		0.9193	7643	22	7621	44	7665	0.00574038	0.00569948		1	561.969	0.0312199	561.938	0.0624398	562	0.000111103	0.000111679
		0.9192	7644	22	7622	44	7666	0.00573963	0.00569948		1	562.969	0.0312755	562.937	0.062551	563	0.000111103	0.000111679
		0.9187	7645	22	7623	44	7667	0.00573888	0.00569948		1	563.969	0.0313311	563.937	0.0626623	564	0.000111103	0.000111679
		0.9184	7648	22	7626	44	7670	0.00573664	0.00569948		1	564.969	0.0313868	564.937	0.0627736	565	0.000111104	0.000111679
		0.9183	7650	22	7628	44	7672	0.00573514	0.00569948		1	565.969	0.0314424	565.937	0.0628848	566	0.000111104	0.000111679
		0.918	7651	22	7629	44	7673	0.00573439	0.00569948		1	566.969	0.031498	566.937	0.0629961	567	0.000111104	0.000111679
[truncated: 12,051 more rows]

## Sheet: Spectral Level Data
Spectral Level Data		Confidence Threshold	Forward	Reverse	Correct	Incorrect	Total	Global FDR	q-value		Fit Confidence Threshold	Fit Forward	Fit Reverse	Fit Correct	Fit Incorrect	Fit Total	Fit Global FDR	Fit Local FDR
[truncated: 13,615 more rows]

[truncated: 13 more sheets: Search Summary, Advanced Metadata, Speed and Distribution Analysis, Single Results Table, Protein FDR Summary, Distinct Peptide FDR Summary, Spectrum FDR Summary, PDST Controls, Protein Summary, Peptide Summary, Distinct Peptide Summary, Feature Summary, Single Column Summary]
