# Supplementary material for: Inhibiting host-protein deposition on urinary catheters reduces associated urinary tract infections
Source: eLife. 2022 Mar 29;11:e75798. doi: 10.7554/eLife.75798 (PMC8986317; doi:10.7554/eLife.75798)
Supplement: Figure 6—source data 1. — Individual data from all figures involving small datasets displayed in individual tabs of this source file. This includes Figures 1B and 2A-F, Figure 3B, Figure 4, Figure 1—figure supplement 1 and Figure 2—figure supplement 1. [file elife-75798-fig6-data1.zip › 06172019_AFlor_Cath_2_A123_R1__FDR.xlsx]

## Sheet: Metadata
_RESULTS_version	5
RESULTS_SEARCH_STAT_search_begin_time_clock	2019-06-19 14:49:40
RESULTS_SEARCH_STAT_search_end_time_clock	2019-06-19 15:06:26
RESULTS_SEARCH_STAT_search_time_duration	4654-05-16
RESULTS_SEARCH_STAT_stage_signal_processing_begin_time_clock	2019-06-19 14:49:40
RESULTS_SEARCH_STAT_stage_signal_processing_end_time_clock	2019-06-19 14:50:29
RESULTS_SEARCH_STAT_stage_signal_processing_time_duration	2031-11-27
RESULTS_SEARCH_STAT_stage_waiting_begin_time_clock	2019-06-19 14:50:29
RESULTS_SEARCH_STAT_stage_waiting_end_time_clock	2019-06-19 14:50:29
RESULTS_SEARCH_STAT_stage_waiting_time_duration	1900-10-05
RESULTS_SEARCH_STAT_stage_searching_begin_time_clock	2019-06-19 14:50:29
RESULTS_SEARCH_STAT_stage_searching_end_time_clock	2019-06-19 15:05:32
RESULTS_SEARCH_STAT_stage_searching_time_duration	4373-03-24
RESULTS_SEARCH_STAT_stage_fdr_begin_time_clock	2019-06-19 15:05:33
RESULTS_SEARCH_STAT_stage_fdr_end_time_clock	2019-06-19 15:06:26
RESULTS_SEARCH_STAT_stage_fdr_time_duration	2046-01-27
RESULTS_SEARCH_STAT_task_fraglet_exe_begin_time_clock	2019-06-19 14:50:33
RESULTS_SEARCH_STAT_task_fraglet_exe_end_time_clock	2019-06-19 14:57:50
RESULTS_SEARCH_STAT_task_fraglet_exe_time_duration	436138
RESULTS_SEARCH_STAT_task_fraglet_exe_time_cpu	4277-02-20
RESULTS_SEARCH_STAT_task_progroup_begin_time_clock	2019-06-19 14:57:50
RESULTS_SEARCH_STAT_task_progroup_end_time_clock	2019-06-19 15:05:32
RESULTS_SEARCH_STAT_task_progroup_time_duration	462413
RESULTS_SEARCH_STAT_task_progroup_time_cpu	3214-03-11
RESULTS_SEARCH_STAT_computer_memory	1933-08-19
RESULTS_SEARCH_STAT_computer_name	ESC308585
RESULTS_SEARCH_STAT_num_proteins	110708
RESULTS_SEARCH_STAT_num_residues	00:00:00
RESULTS_SEARCH_STAT_number_cores	1900-01-08
RESULTS_SEARCH_STAT_number_licensed_tasks	1900-01-02
RESULTS_SEARCH_STAT_number_processors	8
RESULTS_SEARCH_STAT_os	Windows 7 Ultimate (6.1.7600)
RESULTS_SEARCH_1_time_cpu	71203
RESULTS_SEARCH_1_time_duration	71303
RESULTS_SEARCH_1_version	5.0.2.5174
RESULTS_SEARCH_1_xml:id	SEARCH:1:636965525803682795_0
RESULTS_SEARCH_1_PARAMETERS_chemical_data_edited	FALSE
RESULTS_SEARCH_1_PARAMETERS_do_multiprecursor_search	TRUE
RESULTS_SEARCH_1_PARAMETERS_do_reverse_search	TRUE
RESULTS_SEARCH_1_PARAMETERS_max_quant_labels	35
RESULTS_SEARCH_1_PARAMETERS_maxresults	15
RESULTS_SEARCH_1_PARAMETERS_separate_searches	FALSE
RESULTS_SEARCH_1_PARAMETERS_MSTOLERANCE_type	dalton
RESULTS_SEARCH_1_PARAMETERS_MSTOLERANCE_value	0.05
RESULTS_SEARCH_1_PARAMETERS_MSMSTOLERANCE_type	dalton
RESULTS_SEARCH_1_PARAMETERS_MSMSTOLERANCE_value	0.1
RESULTS_SEARCH_1_PARAMETERS_MS_STANDARD_DEVIATION_type	dalton
RESULTS_SEARCH_1_PARAMETERS_MS_STANDARD_DEVIATION_value	0.0025
RESULTS_SEARCH_1_PARAMETERS_MSMS_STANDARD_DEVIATION_type	dalton
RESULTS_SEARCH_1_PARAMETERS_MSMS_STANDARD_DEVIATION_value	0.004
RESULTS_SEARCH_1_PARAMETERS_FASTA_filename	C:\AB SCIEX\ProteinPilot Data\SearchDatabases\2019_UP_Mouse_Con.fasta
RESULTS_SEARCH_1_PARAMETERS_AUTO_CALIBRATION_ms	TRUE
RESULTS_SEARCH_1_PARAMETERS_AUTO_CALIBRATION_msexport	FALSE
RESULTS_SEARCH_1_PARAMETERS_AUTO_CALIBRATION_msms	TRUE
RESULTS_SEARCH_1_PARAMETERS_AUTO_CALIBRATION_msmstolsdratio	3
RESULTS_SEARCH_1_PARAMETERS_AUTO_CALIBRATION_mstolsdratio	11
RESULTS_SEARCH_1_PARAMETERS_AUTO_CALIBRATION_squareroot	FALSE
RESULTS_SEARCH_1_PARAMETERS_AUTO_CALIBRATION_type	dalton
RESULTS_SEARCH_1_PARAMETERS_AUTO_CALIBRATION_MCP_d_s_s_f	0.0666667
RESULTS_SEARCH_1_PARAMETERS_AUTO_CALIBRATION_MCP_d_s_w_f	3
RESULTS_SEARCH_1_PARAMETERS_AUTO_CALIBRATION_MCP_m_f_r_mbc	200
RESULTS_SEARCH_1_PARAMETERS_AUTO_CALIBRATION_MCP_m_m_c	10
RESULTS_SEARCH_1_PARAMETERS_AUTO_CALIBRATION_MCP_m_m_f_s	0.25
RESULTS_SEARCH_1_PARAMETERS_AUTO_CALIBRATION_MCP_m_m_p_f	0.33
RESULTS_SEARCH_1_PARAMETERS_AUTO_CALIBRATION_MCP_m_m_p_rms_f	1
RESULTS_SEARCH_1_PARAMETERS_AUTO_CALIBRATION_MCP_m_p_t_f	1
RESULTS_SEARCH_1_PARAMETERS_AUTO_CALIBRATION_MCP_m_r_h_n_b	15
RESULTS_SEARCH_1_PARAMETERS_AUTO_CALIBRATION_MCP_m_z_n_s	99
RESULTS_SEARCH_1_PARAMETERS_AUTO_CALIBRATION_MCP_m_z_s_mn_f_r	0.0666667
RESULTS_SEARCH_1_PARAMETERS_AUTO_CALIBRATION_MCP_m_z_s_mx_f_r	0.1
RESULTS_SEARCH_1_PARAMETERS_MS_AUTO_CALIBRATION_OUT_avres	4.7699e-13
RESULTS_SEARCH_1_PARAMETERS_MS_AUTO_CALIBRATION_OUT_c0	0.00112274
RESULTS_SEARCH_1_PARAMETERS_MS_AUTO_CALIBRATION_OUT_c1minus1	-1.49884e-05
RESULTS_SEARCH_1_PARAMETERS_MS_AUTO_CALIBRATION_OUT_c2	0
RESULTS_SEARCH_1_PARAMETERS_MS_AUTO_CALIBRATION_OUT_file	1
RESULTS_SEARCH_1_PARAMETERS_MS_AUTO_CALIBRATION_OUT_partnumber	1
RESULTS_SEARCH_1_PARAMETERS_MS_AUTO_CALIBRATION_OUT_polyorder	1
RESULTS_SEARCH_1_PARAMETERS_MS_AUTO_CALIBRATION_OUT_sample	1
RESULTS_SEARCH_1_PARAMETERS_MS_AUTO_CALIBRATION_OUT_squareroot	FALSE
RESULTS_SEARCH_1_PARAMETERS_MSMS_AUTO_CALIBRATION_OUT_avres	2.12837e-11
RESULTS_SEARCH_1_PARAMETERS_MSMS_AUTO_CALIBRATION_OUT_c0	-0.00116807
RESULTS_SEARCH_1_PARAMETERS_MSMS_AUTO_CALIBRATION_OUT_c1minus1	-7.32202e-06
RESULTS_SEARCH_1_PARAMETERS_MSMS_AUTO_CALIBRATION_OUT_c2	0
RESULTS_SEARCH_1_PARAMETERS_MSMS_AUTO_CALIBRATION_OUT_file	1
RESULTS_SEARCH_1_PARAMETERS_MSMS_AUTO_CALIBRATION_OUT_partnumber	1
RESULTS_SEARCH_1_PARAMETERS_MSMS_AUTO_CALIBRATION_OUT_polyorder	1
RESULTS_SEARCH_1_PARAMETERS_MSMS_AUTO_CALIBRATION_OUT_sample	1
RESULTS_SEARCH_1_PARAMETERS_MSMS_AUTO_CALIBRATION_OUT_squareroot	FALSE
RESULTS_SEARCH_1_PARAMETERS_MAX_PRECURSORS_FRAGLET	5
RESULTS_SEARCH_1_PARAMETERS_MAX_PRECURSORS_TAGLET	1
RESULTS_SEARCH_1_PARAMETERS_PRECURSORS_DR_FRAGLET	10
RESULTS_SEARCH_1_PARAMETERS_PRECURSORS_DR_TAGLET	3
RESULTS_SEARCH_1_PARAMETERS_DEFAULT_CHARGE_STATE_1_charge	1
RESULTS_SEARCH_1_PARAMETERS_DEFAULT_CHARGE_STATE_1_probability	1
RESULTS_SEARCH_1_PARAMETERS_DEFAULT_CHARGE_STATE_2_charge	2
RESULTS_SEARCH_1_PARAMETERS_DEFAULT_CHARGE_STATE_2_probability	1
RESULTS_SEARCH_1_PARAMETERS_DEFAULT_CHARGE_STATE_3_charge	3
RESULTS_SEARCH_1_PARAMETERS_DEFAULT_CHARGE_STATE_3_probability	1
RESULTS_SEARCH_1_PARAMETERS_VERSION	5.0.2.0, 5346
RESULTS_SEARCH_1_PARAMETERS_PARAGON_VERSION	5.0.2.0, 5174
RESULTS_SEARCH_1_PARAMETERS_APPLICATION	ProteinPilot(tm) Software
RESULTS_SEARCH_1_PARAMETERS_PROGROUP_alternativedispositionmaximumfoldprobabilitydrop	100
RESULTS_SEARCH_1_PARAMETERS_PROGROUP_alternativedispositionmaximumfoldscoredrop	2
RESULTS_SEARCH_1_PARAMETERS_PROGROUP_autodiscordantpeptidethreshold	0.3
RESULTS_SEARCH_1_PARAMETERS_PROGROUP_bayesconfidencecalclulation	TRUE
RESULTS_SEARCH_1_PARAMETERS_PROGROUP_calibrateconfidence	TRUE
RESULTS_SEARCH_1_PARAMETERS_PROGROUP_compresspeptides	FALSE
RESULTS_SEARCH_1_PARAMETERS_PROGROUP_confidencepercentthresholdforexcludingothersfromquant	15
RESULTS_SEARCH_1_PARAMETERS_PROGROUP_confidencepercentthresholdforincludingselfinquant	15
RESULTS_SEARCH_1_PARAMETERS_PROGROUP_donotstoremspeaklists	FALSE
RESULTS_SEARCH_1_PARAMETERS_PROGROUP_fasta	C:\AB SCIEX\ProteinPilot Data\SearchDatabases\2019_UP_Mouse_Con.fasta
RESULTS_SEARCH_1_PARAMETERS_PROGROUP_featuregroupminpepconf	0.66
RESULTS_SEARCH_1_PARAMETERS_PROGROUP_featuregroupminups	0.47
RESULTS_SEARCH_1_PARAMETERS_PROGROUP_focusingintersection	4
RESULTS_SEARCH_1_PARAMETERS_PROGROUP_focusingminimummatchconfidence	0.1
RESULTS_SEARCH_1_PARAMETERS_PROGROUP_focusingminunusedprotscore	0.1
RESULTS_SEARCH_1_PARAMETERS_PROGROUP_focusingsubsetcutoff	6
RESULTS_SEARCH_1_PARAMETERS_PROGROUP_intersection	1.3
RESULTS_SEARCH_1_PARAMETERS_PROGROUP_minimummatchconfidencecutoff	0.001
RESULTS_SEARCH_1_PARAMETERS_PROGROUP_minunusedprotscore	0.0458
RESULTS_SEARCH_1_PARAMETERS_PROGROUP_subsetcutoff	2
RESULTS_SEARCH_1_PARAMETERS_PROGROUP_uniprotservicehttpssupported	TRUE
RESULTS_SEARCH_1_PARAMETERS_PROGROUP_unusedprotscorethresholdforexcludingothersfromquant	1.3
RESULTS_SEARCH_1_PARAMETERS_PEAKLIST_count	3663
RESULTS_SEARCH_1_PARAMETERS_PEAKLIST_filenumber	1
RESULTS_SEARCH_1_PARAMETERS_PEAKLIST_original_count	3663
RESULTS_SEARCH_1_PARAMETERS_PEAKLIST_originalfilename	C:\Data\Flores_Mirales\06202019\mus2\06172019_AFlor_Cath_2_A1.mgf
RESULTS_SEARCH_1_PARAMETERS_PEAKLIST_partnumber	1
RESULTS_SEARCH_1_PARAMETERS_QUANT_TYPE_background_correction	FALSE
RESULTS_SEARCH_1_PARAMETERS_QUANT_TYPE_bias_correction	TRUE
RESULTS_SEARCH_1_PARAMETERS_QUANT_TYPE_keep_extreme_peptides_over_fraction	00:00:00
RESULTS_SEARCH_1_PARAMETERS_QUANT_TYPE_low_confidence_check	TRUE
RESULTS_SEARCH_1_PARAMETERS_QUANT_TYPE_low_intensity_check	TRUE
RESULTS_SEARCH_1_PARAMETERS_QUANT_TYPE_median_statistic	TRUE
RESULTS_SEARCH_1_PARAMETERS_QUANT_TYPE_mod_check	TRUE
RESULTS_SEARCH_1_PARAMETERS_QUANT_TYPE_quant_threshold	-1
RESULTS_SEARCH_1_PARAMETERS_QUANT_TYPE_quant_threshold_sn	9
RESULTS_SEARCH_1_PARAMETERS_QUANT_TYPE_separate_searches	FALSE
RESULTS_SEARCH_1_PARAMETERS_QUANT_TYPE_shared_msms_check	TRUE
RESULTS_SEARCH_1_PARAMETERS_PARAGON_METHOD_SETTINGS_UI_SAMPLE_TYPE	Identification
RESULTS_SEARCH_1_PARAMETERS_PARAGON_METHOD_SETTINGS_UI_CYS_ALKYLATION	Iodoacetamide
RESULTS_SEARCH_1_PARAMETERS_PARAGON_METHOD_SETTINGS_UI_DIGESTION	Trypsin
RESULTS_SEARCH_1_PARAMETERS_PARAGON_METHOD_SETTINGS_UI_INSTRUMENT	Orbi MS (1-3ppm), Orbi MS/MS
RESULTS_SEARCH_1_PARAMETERS_PARAGON_METHOD_SETTINGS_UI_SEARCH_EFFORT	Rapid
RESULTS_SEARCH_1_PARAMETERS_PARAGON_METHOD_SETTINGS_UI_USER_NAME	ESC308585\MSPF
RESULTS_SEARCH_1_PARAMETERS_PARAGON_METHOD_SETTINGS_UI_MACHINE_NAME	ESC308585
RESULTS_SEARCH_1_PARAMETERS_PARAGON_METHOD_SETTINGS_UI_SEARCH_ID	6.36966e+17
RESULTS_SEARCH_1_PARAMETERS_PARAGON_METHOD_SETTINGS_UI_START_TIME	2019-06-19 14:49:40
RESULTS_SEARCH_1_PARAMETERS_PARAGON_METHOD_SETTINGS_UI_MIN_UNUSED_PROTSCORE	0.0458
RESULTS_SEARCH_1_PARAMETERS_PARAGON_METHOD_SETTINGS_UI_PSPEP	TRUE
RESULTS_SEARCH_2_time_cpu	72375
RESULTS_SEARCH_2_time_duration	72584
RESULTS_SEARCH_2_version	5.0.2.5174
RESULTS_SEARCH_2_xml:id	SEARCH:1:636965525803682795_1
RESULTS_SEARCH_2_PARAMETERS_chemical_data_edited	FALSE
RESULTS_SEARCH_2_PARAMETERS_do_multiprecursor_search	TRUE
RESULTS_SEARCH_2_PARAMETERS_do_reverse_search	TRUE
RESULTS_SEARCH_2_PARAMETERS_max_quant_labels	1900-02-04
RESULTS_SEARCH_2_PARAMETERS_maxresults	15
RESULTS_SEARCH_2_PARAMETERS_separate_searches	FALSE
RESULTS_SEARCH_2_PARAMETERS_MSTOLERANCE_type	dalton
RESULTS_SEARCH_2_PARAMETERS_MSTOLERANCE_value	0.05
RESULTS_SEARCH_2_PARAMETERS_MSMSTOLERANCE_type	dalton
RESULTS_SEARCH_2_PARAMETERS_MSMSTOLERANCE_value	0.1
RESULTS_SEARCH_2_PARAMETERS_MS_STANDARD_DEVIATION_type	dalton
RESULTS_SEARCH_2_PARAMETERS_MS_STANDARD_DEVIATION_value	0.0025
RESULTS_SEARCH_2_PARAMETERS_MSMS_STANDARD_DEVIATION_type	dalton
RESULTS_SEARCH_2_PARAMETERS_MSMS_STANDARD_DEVIATION_value	0.004
RESULTS_SEARCH_2_PARAMETERS_FASTA_filename	C:\AB SCIEX\ProteinPilot Data\SearchDatabases\2019_UP_Mouse_Con.fasta
RESULTS_SEARCH_2_PARAMETERS_AUTO_CALIBRATION_ms	TRUE
RESULTS_SEARCH_2_PARAMETERS_AUTO_CALIBRATION_msexport	FALSE
RESULTS_SEARCH_2_PARAMETERS_AUTO_CALIBRATION_msms	TRUE
RESULTS_SEARCH_2_PARAMETERS_AUTO_CALIBRATION_msmstolsdratio	3
RESULTS_SEARCH_2_PARAMETERS_AUTO_CALIBRATION_mstolsdratio	11
RESULTS_SEARCH_2_PARAMETERS_AUTO_CALIBRATION_squareroot	FALSE
RESULTS_SEARCH_2_PARAMETERS_AUTO_CALIBRATION_type	dalton
RESULTS_SEARCH_2_PARAMETERS_AUTO_CALIBRATION_MCP_d_s_s_f	0.0666667
RESULTS_SEARCH_2_PARAMETERS_AUTO_CALIBRATION_MCP_d_s_w_f	3
RESULTS_SEARCH_2_PARAMETERS_AUTO_CALIBRATION_MCP_m_f_r_mbc	200
RESULTS_SEARCH_2_PARAMETERS_AUTO_CALIBRATION_MCP_m_m_c	10
RESULTS_SEARCH_2_PARAMETERS_AUTO_CALIBRATION_MCP_m_m_f_s	0.25
RESULTS_SEARCH_2_PARAMETERS_AUTO_CALIBRATION_MCP_m_m_p_f	0.33
RESULTS_SEARCH_2_PARAMETERS_AUTO_CALIBRATION_MCP_m_m_p_rms_f	1
RESULTS_SEARCH_2_PARAMETERS_AUTO_CALIBRATION_MCP_m_p_t_f	1
RESULTS_SEARCH_2_PARAMETERS_AUTO_CALIBRATION_MCP_m_r_h_n_b	15
RESULTS_SEARCH_2_PARAMETERS_AUTO_CALIBRATION_MCP_m_z_n_s	99
RESULTS_SEARCH_2_PARAMETERS_AUTO_CALIBRATION_MCP_m_z_s_mn_f_r	0.0666667
RESULTS_SEARCH_2_PARAMETERS_AUTO_CALIBRATION_MCP_m_z_s_mx_f_r	0.1
RESULTS_SEARCH_2_PARAMETERS_MS_AUTO_CALIBRATION_OUT_avres	-5.89568e-13
RESULTS_SEARCH_2_PARAMETERS_MS_AUTO_CALIBRATION_OUT_c0	-0.000541118
RESULTS_SEARCH_2_PARAMETERS_MS_AUTO_CALIBRATION_OUT_c1minus1	-1.24927e-05
RESULTS_SEARCH_2_PARAMETERS_MS_AUTO_CALIBRATION_OUT_c2	0
RESULTS_SEARCH_2_PARAMETERS_MS_AUTO_CALIBRATION_OUT_file	1
RESULTS_SEARCH_2_PARAMETERS_MS_AUTO_CALIBRATION_OUT_partnumber	2
RESULTS_SEARCH_2_PARAMETERS_MS_AUTO_CALIBRATION_OUT_polyorder	1
RESULTS_SEARCH_2_PARAMETERS_MS_AUTO_CALIBRATION_OUT_sample	1
RESULTS_SEARCH_2_PARAMETERS_MS_AUTO_CALIBRATION_OUT_squareroot	FALSE
RESULTS_SEARCH_2_PARAMETERS_MSMS_AUTO_CALIBRATION_OUT_avres	8.65603e-11
RESULTS_SEARCH_2_PARAMETERS_MSMS_AUTO_CALIBRATION_OUT_c0	-0.00198846
RESULTS_SEARCH_2_PARAMETERS_MSMS_AUTO_CALIBRATION_OUT_c1minus1	-5.99679e-06
RESULTS_SEARCH_2_PARAMETERS_MSMS_AUTO_CALIBRATION_OUT_c2	0
RESULTS_SEARCH_2_PARAMETERS_MSMS_AUTO_CALIBRATION_OUT_file	1900-01-01
RESULTS_SEARCH_2_PARAMETERS_MSMS_AUTO_CALIBRATION_OUT_partnumber	2
RESULTS_SEARCH_2_PARAMETERS_MSMS_AUTO_CALIBRATION_OUT_polyorder	1
RESULTS_SEARCH_2_PARAMETERS_MSMS_AUTO_CALIBRATION_OUT_sample	1
RESULTS_SEARCH_2_PARAMETERS_MSMS_AUTO_CALIBRATION_OUT_squareroot	FALSE
RESULTS_SEARCH_2_PARAMETERS_MAX_PRECURSORS_FRAGLET	5
RESULTS_SEARCH_2_PARAMETERS_MAX_PRECURSORS_TAGLET	1
RESULTS_SEARCH_2_PARAMETERS_PRECURSORS_DR_FRAGLET	10
RESULTS_SEARCH_2_PARAMETERS_PRECURSORS_DR_TAGLET	3
RESULTS_SEARCH_2_PARAMETERS_DEFAULT_CHARGE_STATE_1_charge	1
RESULTS_SEARCH_2_PARAMETERS_DEFAULT_CHARGE_STATE_1_probability	1
RESULTS_SEARCH_2_PARAMETERS_DEFAULT_CHARGE_STATE_2_charge	2
RESULTS_SEARCH_2_PARAMETERS_DEFAULT_CHARGE_STATE_2_probability	1
RESULTS_SEARCH_2_PARAMETERS_DEFAULT_CHARGE_STATE_3_charge	3
RESULTS_SEARCH_2_PARAMETERS_DEFAULT_CHARGE_STATE_3_probability	1
RESULTS_SEARCH_2_PARAMETERS_VERSION	5.0.2.0, 5346
RESULTS_SEARCH_2_PARAMETERS_PARAGON_VERSION	5.0.2.0, 5174
RESULTS_SEARCH_2_PARAMETERS_APPLICATION	ProteinPilot(tm) Software
RESULTS_SEARCH_2_PARAMETERS_PROGROUP_alternativedispositionmaximumfoldprobabilitydrop	100
RESULTS_SEARCH_2_PARAMETERS_PROGROUP_alternativedispositionmaximumfoldscoredrop	2
RESULTS_SEARCH_2_PARAMETERS_PROGROUP_autodiscordantpeptidethreshold	0.3
RESULTS_SEARCH_2_PARAMETERS_PROGROUP_bayesconfidencecalclulation	TRUE
RESULTS_SEARCH_2_PARAMETERS_PROGROUP_calibrateconfidence	TRUE
RESULTS_SEARCH_2_PARAMETERS_PROGROUP_compresspeptides	FALSE
RESULTS_SEARCH_2_PARAMETERS_PROGROUP_confidencepercentthresholdforexcludingothersfromquant	15
RESULTS_SEARCH_2_PARAMETERS_PROGROUP_confidencepercentthresholdforincludingselfinquant	15
RESULTS_SEARCH_2_PARAMETERS_PROGROUP_donotstoremspeaklists	FALSE
RESULTS_SEARCH_2_PARAMETERS_PROGROUP_fasta	C:\AB SCIEX\ProteinPilot Data\SearchDatabases\2019_UP_Mouse_Con.fasta
RESULTS_SEARCH_2_PARAMETERS_PROGROUP_featuregroupminpepconf	0.66
RESULTS_SEARCH_2_PARAMETERS_PROGROUP_featuregroupminups	0.47
RESULTS_SEARCH_2_PARAMETERS_PROGROUP_focusingintersection	4
RESULTS_SEARCH_2_PARAMETERS_PROGROUP_focusingminimummatchconfidence	0.1
RESULTS_SEARCH_2_PARAMETERS_PROGROUP_focusingminunusedprotscore	0.1
RESULTS_SEARCH_2_PARAMETERS_PROGROUP_focusingsubsetcutoff	6
RESULTS_SEARCH_2_PARAMETERS_PROGROUP_intersection	1.3
RESULTS_SEARCH_2_PARAMETERS_PROGROUP_minimummatchconfidencecutoff	0.001
RESULTS_SEARCH_2_PARAMETERS_PROGROUP_minunusedprotscore	0.0458
RESULTS_SEARCH_2_PARAMETERS_PROGROUP_subsetcutoff	2
RESULTS_SEARCH_2_PARAMETERS_PROGROUP_uniprotservicehttpssupported	TRUE
RESULTS_SEARCH_2_PARAMETERS_PROGROUP_unusedprotscorethresholdforexcludingothersfromquant	1.3
RESULTS_SEARCH_2_PARAMETERS_PEAKLIST_count	3670
RESULTS_SEARCH_2_PARAMETERS_PEAKLIST_filenumber	1
RESULTS_SEARCH_2_PARAMETERS_PEAKLIST_original_count	3670
RESULTS_SEARCH_2_PARAMETERS_PEAKLIST_originalfilename	C:\Data\Flores_Mirales\06202019\mus2\06172019_AFlor_Cath_2_A1.mgf
RESULTS_SEARCH_2_PARAMETERS_PEAKLIST_partnumber	2
RESULTS_SEARCH_2_PARAMETERS_QUANT_TYPE_background_correction	FALSE
RESULTS_SEARCH_2_PARAMETERS_QUANT_TYPE_bias_correction	TRUE
RESULTS_SEARCH_2_PARAMETERS_QUANT_TYPE_keep_extreme_peptides_over_fraction	0
RESULTS_SEARCH_2_PARAMETERS_QUANT_TYPE_low_confidence_check	TRUE
RESULTS_SEARCH_2_PARAMETERS_QUANT_TYPE_low_intensity_check	TRUE
RESULTS_SEARCH_2_PARAMETERS_QUANT_TYPE_median_statistic	TRUE
RESULTS_SEARCH_2_PARAMETERS_QUANT_TYPE_mod_check	TRUE
RESULTS_SEARCH_2_PARAMETERS_QUANT_TYPE_quant_threshold	-1
RESULTS_SEARCH_2_PARAMETERS_QUANT_TYPE_quant_threshold_sn	9
RESULTS_SEARCH_2_PARAMETERS_QUANT_TYPE_separate_searches	FALSE
RESULTS_SEARCH_2_PARAMETERS_QUANT_TYPE_shared_msms_check	TRUE
RESULTS_SEARCH_2_PARAMETERS_PARAGON_METHOD_SETTINGS_UI_SAMPLE_TYPE	Identification
RESULTS_SEARCH_2_PARAMETERS_PARAGON_METHOD_SETTINGS_UI_CYS_ALKYLATION	Iodoacetamide
RESULTS_SEARCH_2_PARAMETERS_PARAGON_METHOD_SETTINGS_UI_DIGESTION	Trypsin
RESULTS_SEARCH_2_PARAMETERS_PARAGON_METHOD_SETTINGS_UI_INSTRUMENT	Orbi MS (1-3ppm), Orbi MS/MS
RESULTS_SEARCH_2_PARAMETERS_PARAGON_METHOD_SETTINGS_UI_SEARCH_EFFORT	Rapid
RESULTS_SEARCH_2_PARAMETERS_PARAGON_METHOD_SETTINGS_UI_USER_NAME	ESC308585\MSPF
RESULTS_SEARCH_2_PARAMETERS_PARAGON_METHOD_SETTINGS_UI_MACHINE_NAME	ESC308585
RESULTS_SEARCH_2_PARAMETERS_PARAGON_METHOD_SETTINGS_UI_SEARCH_ID	6.36966e+17
RESULTS_SEARCH_2_PARAMETERS_PARAGON_METHOD_SETTINGS_UI_START_TIME	2019-06-19 14:49:40
RESULTS_SEARCH_2_PARAMETERS_PARAGON_METHOD_SETTINGS_UI_MIN_UNUSED_PROTSCORE	0.0458
RESULTS_SEARCH_2_PARAMETERS_PARAGON_METHOD_SETTINGS_UI_PSPEP	TRUE
RESULTS_SEARCH_3_time_cpu	66781
RESULTS_SEARCH_3_time_duration	67051
RESULTS_SEARCH_3_version	5.0.2.5174
RESULTS_SEARCH_3_xml:id	SEARCH:1:636965525803682795_2
RESULTS_SEARCH_3_PARAMETERS_chemical_data_edited	FALSE
RESULTS_SEARCH_3_PARAMETERS_do_multiprecursor_search	TRUE
RESULTS_SEARCH_3_PARAMETERS_do_reverse_search	TRUE
RESULTS_SEARCH_3_PARAMETERS_max_quant_labels	1900-02-04
RESULTS_SEARCH_3_PARAMETERS_maxresults	15
RESULTS_SEARCH_3_PARAMETERS_separate_searches	FALSE
RESULTS_SEARCH_3_PARAMETERS_MSTOLERANCE_type	dalton
RESULTS_SEARCH_3_PARAMETERS_MSTOLERANCE_value	0.05
RESULTS_SEARCH_3_PARAMETERS_MSMSTOLERANCE_type	dalton
RESULTS_SEARCH_3_PARAMETERS_MSMSTOLERANCE_value	0.1
RESULTS_SEARCH_3_PARAMETERS_MS_STANDARD_DEVIATION_type	dalton
RESULTS_SEARCH_3_PARAMETERS_MS_STANDARD_DEVIATION_value	0.0025
RESULTS_SEARCH_3_PARAMETERS_MSMS_STANDARD_DEVIATION_type	dalton
RESULTS_SEARCH_3_PARAMETERS_MSMS_STANDARD_DEVIATION_value	0.004
RESULTS_SEARCH_3_PARAMETERS_FASTA_filename	C:\AB SCIEX\ProteinPilot Data\SearchDatabases\2019_UP_Mouse_Con.fasta
RESULTS_SEARCH_3_PARAMETERS_AUTO_CALIBRATION_ms	TRUE
RESULTS_SEARCH_3_PARAMETERS_AUTO_CALIBRATION_msexport	FALSE
RESULTS_SEARCH_3_PARAMETERS_AUTO_CALIBRATION_msms	TRUE
RESULTS_SEARCH_3_PARAMETERS_AUTO_CALIBRATION_msmstolsdratio	3
RESULTS_SEARCH_3_PARAMETERS_AUTO_CALIBRATION_mstolsdratio	11
RESULTS_SEARCH_3_PARAMETERS_AUTO_CALIBRATION_squareroot	FALSE
RESULTS_SEARCH_3_PARAMETERS_AUTO_CALIBRATION_type	dalton
RESULTS_SEARCH_3_PARAMETERS_AUTO_CALIBRATION_MCP_d_s_s_f	0.0666667
RESULTS_SEARCH_3_PARAMETERS_AUTO_CALIBRATION_MCP_d_s_w_f	3
RESULTS_SEARCH_3_PARAMETERS_AUTO_CALIBRATION_MCP_m_f_r_mbc	200
RESULTS_SEARCH_3_PARAMETERS_AUTO_CALIBRATION_MCP_m_m_c	10
RESULTS_SEARCH_3_PARAMETERS_AUTO_CALIBRATION_MCP_m_m_f_s	0.25
RESULTS_SEARCH_3_PARAMETERS_AUTO_CALIBRATION_MCP_m_m_p_f	0.33
RESULTS_SEARCH_3_PARAMETERS_AUTO_CALIBRATION_MCP_m_m_p_rms_f	1
RESULTS_SEARCH_3_PARAMETERS_AUTO_CALIBRATION_MCP_m_p_t_f	1
RESULTS_SEARCH_3_PARAMETERS_AUTO_CALIBRATION_MCP_m_r_h_n_b	15
RESULTS_SEARCH_3_PARAMETERS_AUTO_CALIBRATION_MCP_m_z_n_s	99
RESULTS_SEARCH_3_PARAMETERS_AUTO_CALIBRATION_MCP_m_z_s_mn_f_r	0.0666667
RESULTS_SEARCH_3_PARAMETERS_AUTO_CALIBRATION_MCP_m_z_s_mx_f_r	0.1
RESULTS_SEARCH_3_PARAMETERS_MS_AUTO_CALIBRATION_OUT_avres	1.22171e-12
RESULTS_SEARCH_3_PARAMETERS_MS_AUTO_CALIBRATION_OUT_c0	-0.000492409
RESULTS_SEARCH_3_PARAMETERS_MS_AUTO_CALIBRATION_OUT_c1minus1	-1.21721e-05
RESULTS_SEARCH_3_PARAMETERS_MS_AUTO_CALIBRATION_OUT_c2	0
RESULTS_SEARCH_3_PARAMETERS_MS_AUTO_CALIBRATION_OUT_file	1
RESULTS_SEARCH_3_PARAMETERS_MS_AUTO_CALIBRATION_OUT_partnumber	3
RESULTS_SEARCH_3_PARAMETERS_MS_AUTO_CALIBRATION_OUT_polyorder	1
RESULTS_SEARCH_3_PARAMETERS_MS_AUTO_CALIBRATION_OUT_sample	1
RESULTS_SEARCH_3_PARAMETERS_MS_AUTO_CALIBRATION_OUT_squareroot	FALSE
RESULTS_SEARCH_3_PARAMETERS_MSMS_AUTO_CALIBRATION_OUT_avres	3.19471e-11
RESULTS_SEARCH_3_PARAMETERS_MSMS_AUTO_CALIBRATION_OUT_c0	-0.00175226
RESULTS_SEARCH_3_PARAMETERS_MSMS_AUTO_CALIBRATION_OUT_c1minus1	-5.98718e-06
RESULTS_SEARCH_3_PARAMETERS_MSMS_AUTO_CALIBRATION_OUT_c2	0
RESULTS_SEARCH_3_PARAMETERS_MSMS_AUTO_CALIBRATION_OUT_file	1
RESULTS_SEARCH_3_PARAMETERS_MSMS_AUTO_CALIBRATION_OUT_partnumber	3
RESULTS_SEARCH_3_PARAMETERS_MSMS_AUTO_CALIBRATION_OUT_polyorder	1
RESULTS_SEARCH_3_PARAMETERS_MSMS_AUTO_CALIBRATION_OUT_sample	1
RESULTS_SEARCH_3_PARAMETERS_MSMS_AUTO_CALIBRATION_OUT_squareroot	FALSE
RESULTS_SEARCH_3_PARAMETERS_MAX_PRECURSORS_FRAGLET	5
RESULTS_SEARCH_3_PARAMETERS_MAX_PRECURSORS_TAGLET	1
RESULTS_SEARCH_3_PARAMETERS_PRECURSORS_DR_FRAGLET	10
RESULTS_SEARCH_3_PARAMETERS_PRECURSORS_DR_TAGLET	3
RESULTS_SEARCH_3_PARAMETERS_DEFAULT_CHARGE_STATE_1_charge	1
RESULTS_SEARCH_3_PARAMETERS_DEFAULT_CHARGE_STATE_1_probability	1
RESULTS_SEARCH_3_PARAMETERS_DEFAULT_CHARGE_STATE_2_charge	2
RESULTS_SEARCH_3_PARAMETERS_DEFAULT_CHARGE_STATE_2_probability	1
RESULTS_SEARCH_3_PARAMETERS_DEFAULT_CHARGE_STATE_3_charge	1900-01-03
RESULTS_SEARCH_3_PARAMETERS_DEFAULT_CHARGE_STATE_3_probability	1
RESULTS_SEARCH_3_PARAMETERS_VERSION	5.0.2.0, 5346
RESULTS_SEARCH_3_PARAMETERS_PARAGON_VERSION	5.0.2.0, 5174
RESULTS_SEARCH_3_PARAMETERS_APPLICATION	ProteinPilot(tm) Software
RESULTS_SEARCH_3_PARAMETERS_PROGROUP_alternativedispositionmaximumfoldprobabilitydrop	100
RESULTS_SEARCH_3_PARAMETERS_PROGROUP_alternativedispositionmaximumfoldscoredrop	2
RESULTS_SEARCH_3_PARAMETERS_PROGROUP_autodiscordantpeptidethreshold	0.3
RESULTS_SEARCH_3_PARAMETERS_PROGROUP_bayesconfidencecalclulation	TRUE
RESULTS_SEARCH_3_PARAMETERS_PROGROUP_calibrateconfidence	TRUE
RESULTS_SEARCH_3_PARAMETERS_PROGROUP_compresspeptides	FALSE
RESULTS_SEARCH_3_PARAMETERS_PROGROUP_confidencepercentthresholdforexcludingothersfromquant	15
RESULTS_SEARCH_3_PARAMETERS_PROGROUP_confidencepercentthresholdforincludingselfinquant	15
RESULTS_SEARCH_3_PARAMETERS_PROGROUP_donotstoremspeaklists	FALSE
RESULTS_SEARCH_3_PARAMETERS_PROGROUP_fasta	C:\AB SCIEX\ProteinPilot Data\SearchDatabases\2019_UP_Mouse_Con.fasta
RESULTS_SEARCH_3_PARAMETERS_PROGROUP_featuregroupminpepconf	0.66
RESULTS_SEARCH_3_PARAMETERS_PROGROUP_featuregroupminups	0.47
RESULTS_SEARCH_3_PARAMETERS_PROGROUP_focusingintersection	4
RESULTS_SEARCH_3_PARAMETERS_PROGROUP_focusingminimummatchconfidence	0.1
RESULTS_SEARCH_3_PARAMETERS_PROGROUP_focusingminunusedprotscore	0.1
RESULTS_SEARCH_3_PARAMETERS_PROGROUP_focusingsubsetcutoff	6
RESULTS_SEARCH_3_PARAMETERS_PROGROUP_intersection	1.3
RESULTS_SEARCH_3_PARAMETERS_PROGROUP_minimummatchconfidencecutoff	0.001
RESULTS_SEARCH_3_PARAMETERS_PROGROUP_minunusedprotscore	0.0458
RESULTS_SEARCH_3_PARAMETERS_PROGROUP_subsetcutoff	2
RESULTS_SEARCH_3_PARAMETERS_PROGROUP_uniprotservicehttpssupported	TRUE
RESULTS_SEARCH_3_PARAMETERS_PROGROUP_unusedprotscorethresholdforexcludingothersfromquant	1.3
RESULTS_SEARCH_3_PARAMETERS_PEAKLIST_count	3692
RESULTS_SEARCH_3_PARAMETERS_PEAKLIST_filenumber	1
RESULTS_SEARCH_3_PARAMETERS_PEAKLIST_original_count	3692
RESULTS_SEARCH_3_PARAMETERS_PEAKLIST_originalfilename	C:\Data\Flores_Mirales\06202019\mus2\06172019_AFlor_Cath_2_A1.mgf
RESULTS_SEARCH_3_PARAMETERS_PEAKLIST_partnumber	3
RESULTS_SEARCH_3_PARAMETERS_QUANT_TYPE_background_correction	FALSE
RESULTS_SEARCH_3_PARAMETERS_QUANT_TYPE_bias_correction	TRUE
RESULTS_SEARCH_3_PARAMETERS_QUANT_TYPE_keep_extreme_peptides_over_fraction	0
RESULTS_SEARCH_3_PARAMETERS_QUANT_TYPE_low_confidence_check	TRUE
RESULTS_SEARCH_3_PARAMETERS_QUANT_TYPE_low_intensity_check	TRUE
RESULTS_SEARCH_3_PARAMETERS_QUANT_TYPE_median_statistic	TRUE
RESULTS_SEARCH_3_PARAMETERS_QUANT_TYPE_mod_check	TRUE
RESULTS_SEARCH_3_PARAMETERS_QUANT_TYPE_quant_threshold	-1
RESULTS_SEARCH_3_PARAMETERS_QUANT_TYPE_quant_threshold_sn	9
RESULTS_SEARCH_3_PARAMETERS_QUANT_TYPE_separate_searches	FALSE
RESULTS_SEARCH_3_PARAMETERS_QUANT_TYPE_shared_msms_check	TRUE
RESULTS_SEARCH_3_PARAMETERS_PARAGON_METHOD_SETTINGS_UI_SAMPLE_TYPE	Identification
RESULTS_SEARCH_3_PARAMETERS_PARAGON_METHOD_SETTINGS_UI_CYS_ALKYLATION	Iodoacetamide
RESULTS_SEARCH_3_PARAMETERS_PARAGON_METHOD_SETTINGS_UI_DIGESTION	Trypsin
RESULTS_SEARCH_3_PARAMETERS_PARAGON_METHOD_SETTINGS_UI_INSTRUMENT	Orbi MS (1-3ppm), Orbi MS/MS
RESULTS_SEARCH_3_PARAMETERS_PARAGON_METHOD_SETTINGS_UI_SEARCH_EFFORT	Rapid
RESULTS_SEARCH_3_PARAMETERS_PARAGON_METHOD_SETTINGS_UI_USER_NAME	ESC308585\MSPF
RESULTS_SEARCH_3_PARAMETERS_PARAGON_METHOD_SETTINGS_UI_MACHINE_NAME	ESC308585
RESULTS_SEARCH_3_PARAMETERS_PARAGON_METHOD_SETTINGS_UI_SEARCH_ID	6.36966e+17
RESULTS_SEARCH_3_PARAMETERS_PARAGON_METHOD_SETTINGS_UI_START_TIME	2019-06-19 14:49:40
RESULTS_SEARCH_3_PARAMETERS_PARAGON_METHOD_SETTINGS_UI_MIN_UNUSED_PROTSCORE	0.0458
RESULTS_SEARCH_3_PARAMETERS_PARAGON_METHOD_SETTINGS_UI_PSPEP	TRUE
RESULTS_SEARCH_4_time_cpu	48343
RESULTS_SEARCH_4_time_duration	48533
RESULTS_SEARCH_4_version	5.0.2.5174
RESULTS_SEARCH_4_xml:id	SEARCH:1:636965525803682795_3
RESULTS_SEARCH_4_PARAMETERS_chemical_data_edited	FALSE
RESULTS_SEARCH_4_PARAMETERS_do_multiprecursor_search	TRUE
RESULTS_SEARCH_4_PARAMETERS_do_reverse_search	TRUE
RESULTS_SEARCH_4_PARAMETERS_max_quant_labels	35
RESULTS_SEARCH_4_PARAMETERS_maxresults	15
RESULTS_SEARCH_4_PARAMETERS_separate_searches	FALSE
RESULTS_SEARCH_4_PARAMETERS_MSTOLERANCE_type	dalton
RESULTS_SEARCH_4_PARAMETERS_MSTOLERANCE_value	0.05
RESULTS_SEARCH_4_PARAMETERS_MSMSTOLERANCE_type	dalton
RESULTS_SEARCH_4_PARAMETERS_MSMSTOLERANCE_value	0.1
RESULTS_SEARCH_4_PARAMETERS_MS_STANDARD_DEVIATION_type	dalton
RESULTS_SEARCH_4_PARAMETERS_MS_STANDARD_DEVIATION_value	0.0025
RESULTS_SEARCH_4_PARAMETERS_MSMS_STANDARD_DEVIATION_type	dalton
RESULTS_SEARCH_4_PARAMETERS_MSMS_STANDARD_DEVIATION_value	0.004
RESULTS_SEARCH_4_PARAMETERS_FASTA_filename	C:\AB SCIEX\ProteinPilot Data\SearchDatabases\2019_UP_Mouse_Con.fasta
RESULTS_SEARCH_4_PARAMETERS_AUTO_CALIBRATION_ms	TRUE
RESULTS_SEARCH_4_PARAMETERS_AUTO_CALIBRATION_msexport	FALSE
RESULTS_SEARCH_4_PARAMETERS_AUTO_CALIBRATION_msms	TRUE
RESULTS_SEARCH_4_PARAMETERS_AUTO_CALIBRATION_msmstolsdratio	3
RESULTS_SEARCH_4_PARAMETERS_AUTO_CALIBRATION_mstolsdratio	11
RESULTS_SEARCH_4_PARAMETERS_AUTO_CALIBRATION_squareroot	FALSE
RESULTS_SEARCH_4_PARAMETERS_AUTO_CALIBRATION_type	dalton
RESULTS_SEARCH_4_PARAMETERS_AUTO_CALIBRATION_MCP_d_s_s_f	0.0666667
RESULTS_SEARCH_4_PARAMETERS_AUTO_CALIBRATION_MCP_d_s_w_f	3
RESULTS_SEARCH_4_PARAMETERS_AUTO_CALIBRATION_MCP_m_f_r_mbc	200
RESULTS_SEARCH_4_PARAMETERS_AUTO_CALIBRATION_MCP_m_m_c	10
RESULTS_SEARCH_4_PARAMETERS_AUTO_CALIBRATION_MCP_m_m_f_s	0.25
RESULTS_SEARCH_4_PARAMETERS_AUTO_CALIBRATION_MCP_m_m_p_f	0.33
RESULTS_SEARCH_4_PARAMETERS_AUTO_CALIBRATION_MCP_m_m_p_rms_f	1
RESULTS_SEARCH_4_PARAMETERS_AUTO_CALIBRATION_MCP_m_p_t_f	1
RESULTS_SEARCH_4_PARAMETERS_AUTO_CALIBRATION_MCP_m_r_h_n_b	15
RESULTS_SEARCH_4_PARAMETERS_AUTO_CALIBRATION_MCP_m_z_n_s	99
RESULTS_SEARCH_4_PARAMETERS_AUTO_CALIBRATION_MCP_m_z_s_mn_f_r	0.0666667
RESULTS_SEARCH_4_PARAMETERS_AUTO_CALIBRATION_MCP_m_z_s_mx_f_r	0.1
RESULTS_SEARCH_4_PARAMETERS_MS_AUTO_CALIBRATION_OUT_avres	7.25069e-13
RESULTS_SEARCH_4_PARAMETERS_MS_AUTO_CALIBRATION_OUT_c0	0.000386066
RESULTS_SEARCH_4_PARAMETERS_MS_AUTO_CALIBRATION_OUT_c1minus1	-1.34631e-05
RESULTS_SEARCH_4_PARAMETERS_MS_AUTO_CALIBRATION_OUT_c2	0
RESULTS_SEARCH_4_PARAMETERS_MS_AUTO_CALIBRATION_OUT_file	1
RESULTS_SEARCH_4_PARAMETERS_MS_AUTO_CALIBRATION_OUT_partnumber	4
RESULTS_SEARCH_4_PARAMETERS_MS_AUTO_CALIBRATION_OUT_polyorder	1
RESULTS_SEARCH_4_PARAMETERS_MS_AUTO_CALIBRATION_OUT_sample	1
RESULTS_SEARCH_4_PARAMETERS_MS_AUTO_CALIBRATION_OUT_squareroot	FALSE
RESULTS_SEARCH_4_PARAMETERS_MSMS_AUTO_CALIBRATION_OUT_avres	6.40257e-09
RESULTS_SEARCH_4_PARAMETERS_MSMS_AUTO_CALIBRATION_OUT_c0	-0.0031025
RESULTS_SEARCH_4_PARAMETERS_MSMS_AUTO_CALIBRATION_OUT_c1minus1	-3.17107e-06
RESULTS_SEARCH_4_PARAMETERS_MSMS_AUTO_CALIBRATION_OUT_c2	0
RESULTS_SEARCH_4_PARAMETERS_MSMS_AUTO_CALIBRATION_OUT_file	1
RESULTS_SEARCH_4_PARAMETERS_MSMS_AUTO_CALIBRATION_OUT_partnumber	4
RESULTS_SEARCH_4_PARAMETERS_MSMS_AUTO_CALIBRATION_OUT_polyorder	1
RESULTS_SEARCH_4_PARAMETERS_MSMS_AUTO_CALIBRATION_OUT_sample	1
RESULTS_SEARCH_4_PARAMETERS_MSMS_AUTO_CALIBRATION_OUT_squareroot	FALSE
RESULTS_SEARCH_4_PARAMETERS_MAX_PRECURSORS_FRAGLET	5
RESULTS_SEARCH_4_PARAMETERS_MAX_PRECURSORS_TAGLET	1
RESULTS_SEARCH_4_PARAMETERS_PRECURSORS_DR_FRAGLET	10
RESULTS_SEARCH_4_PARAMETERS_PRECURSORS_DR_TAGLET	3
RESULTS_SEARCH_4_PARAMETERS_DEFAULT_CHARGE_STATE_1_charge	1
RESULTS_SEARCH_4_PARAMETERS_DEFAULT_CHARGE_STATE_1_probability	1
RESULTS_SEARCH_4_PARAMETERS_DEFAULT_CHARGE_STATE_2_charge	2
RESULTS_SEARCH_4_PARAMETERS_DEFAULT_CHARGE_STATE_2_probability	1
RESULTS_SEARCH_4_PARAMETERS_DEFAULT_CHARGE_STATE_3_charge	3
RESULTS_SEARCH_4_PARAMETERS_DEFAULT_CHARGE_STATE_3_probability	1
RESULTS_SEARCH_4_PARAMETERS_VERSION	5.0.2.0, 5346
RESULTS_SEARCH_4_PARAMETERS_PARAGON_VERSION	5.0.2.0, 5174
RESULTS_SEARCH_4_PARAMETERS_APPLICATION	ProteinPilot(tm) Software
RESULTS_SEARCH_4_PARAMETERS_PROGROUP_alternativedispositionmaximumfoldprobabilitydrop	100
RESULTS_SEARCH_4_PARAMETERS_PROGROUP_alternativedispositionmaximumfoldscoredrop	2
RESULTS_SEARCH_4_PARAMETERS_PROGROUP_autodiscordantpeptidethreshold	0.3
RESULTS_SEARCH_4_PARAMETERS_PROGROUP_bayesconfidencecalclulation	TRUE
RESULTS_SEARCH_4_PARAMETERS_PROGROUP_calibrateconfidence	TRUE
RESULTS_SEARCH_4_PARAMETERS_PROGROUP_compresspeptides	FALSE
RESULTS_SEARCH_4_PARAMETERS_PROGROUP_confidencepercentthresholdforexcludingothersfromquant	15
RESULTS_SEARCH_4_PARAMETERS_PROGROUP_confidencepercentthresholdforincludingselfinquant	15
RESULTS_SEARCH_4_PARAMETERS_PROGROUP_donotstoremspeaklists	FALSE
RESULTS_SEARCH_4_PARAMETERS_PROGROUP_fasta	C:\AB SCIEX\ProteinPilot Data\SearchDatabases\2019_UP_Mouse_Con.fasta
RESULTS_SEARCH_4_PARAMETERS_PROGROUP_featuregroupminpepconf	0.66
RESULTS_SEARCH_4_PARAMETERS_PROGROUP_featuregroupminups	0.47
RESULTS_SEARCH_4_PARAMETERS_PROGROUP_focusingintersection	4
RESULTS_SEARCH_4_PARAMETERS_PROGROUP_focusingminimummatchconfidence	0.1
RESULTS_SEARCH_4_PARAMETERS_PROGROUP_focusingminunusedprotscore	0.1
RESULTS_SEARCH_4_PARAMETERS_PROGROUP_focusingsubsetcutoff	6
RESULTS_SEARCH_4_PARAMETERS_PROGROUP_intersection	1.3
RESULTS_SEARCH_4_PARAMETERS_PROGROUP_minimummatchconfidencecutoff	0.001
RESULTS_SEARCH_4_PARAMETERS_PROGROUP_minunusedprotscore	0.0458
RESULTS_SEARCH_4_PARAMETERS_PROGROUP_subsetcutoff	2
RESULTS_SEARCH_4_PARAMETERS_PROGROUP_uniprotservicehttpssupported	TRUE
RESULTS_SEARCH_4_PARAMETERS_PROGROUP_unusedprotscorethresholdforexcludingothersfromquant	1.3
RESULTS_SEARCH_4_PARAMETERS_PEAKLIST_count	3690
RESULTS_SEARCH_4_PARAMETERS_PEAKLIST_filenumber	1
RESULTS_SEARCH_4_PARAMETERS_PEAKLIST_original_count	3690
RESULTS_SEARCH_4_PARAMETERS_PEAKLIST_originalfilename	C:\Data\Flores_Mirales\06202019\mus2\06172019_AFlor_Cath_2_A1.mgf
RESULTS_SEARCH_4_PARAMETERS_PEAKLIST_partnumber	4
RESULTS_SEARCH_4_PARAMETERS_QUANT_TYPE_background_correction	FALSE
RESULTS_SEARCH_4_PARAMETERS_QUANT_TYPE_bias_correction	TRUE
RESULTS_SEARCH_4_PARAMETERS_QUANT_TYPE_keep_extreme_peptides_over_fraction	0
RESULTS_SEARCH_4_PARAMETERS_QUANT_TYPE_low_confidence_check	TRUE
RESULTS_SEARCH_4_PARAMETERS_QUANT_TYPE_low_intensity_check	TRUE
RESULTS_SEARCH_4_PARAMETERS_QUANT_TYPE_median_statistic	TRUE
RESULTS_SEARCH_4_PARAMETERS_QUANT_TYPE_mod_check	TRUE
RESULTS_SEARCH_4_PARAMETERS_QUANT_TYPE_quant_threshold	-1
RESULTS_SEARCH_4_PARAMETERS_QUANT_TYPE_quant_threshold_sn	9
RESULTS_SEARCH_4_PARAMETERS_QUANT_TYPE_separate_searches	FALSE
RESULTS_SEARCH_4_PARAMETERS_QUANT_TYPE_shared_msms_check	TRUE
RESULTS_SEARCH_4_PARAMETERS_PARAGON_METHOD_SETTINGS_UI_SAMPLE_TYPE	Identification
RESULTS_SEARCH_4_PARAMETERS_PARAGON_METHOD_SETTINGS_UI_CYS_ALKYLATION	Iodoacetamide
RESULTS_SEARCH_4_PARAMETERS_PARAGON_METHOD_SETTINGS_UI_DIGESTION	Trypsin
RESULTS_SEARCH_4_PARAMETERS_PARAGON_METHOD_SETTINGS_UI_INSTRUMENT	Orbi MS (1-3ppm), Orbi MS/MS
RESULTS_SEARCH_4_PARAMETERS_PARAGON_METHOD_SETTINGS_UI_SEARCH_EFFORT	Rapid
RESULTS_SEARCH_4_PARAMETERS_PARAGON_METHOD_SETTINGS_UI_USER_NAME	ESC308585\MSPF
RESULTS_SEARCH_4_PARAMETERS_PARAGON_METHOD_SETTINGS_UI_MACHINE_NAME	ESC308585
RESULTS_SEARCH_4_PARAMETERS_PARAGON_METHOD_SETTINGS_UI_SEARCH_ID	6.36966e+17
RESULTS_SEARCH_4_PARAMETERS_PARAGON_METHOD_SETTINGS_UI_START_TIME	2019-06-19 14:49:40
RESULTS_SEARCH_4_PARAMETERS_PARAGON_METHOD_SETTINGS_UI_MIN_UNUSED_PROTSCORE	0.0458
RESULTS_SEARCH_4_PARAMETERS_PARAGON_METHOD_SETTINGS_UI_PSPEP	TRUE
RESULTS_SEARCH_5_time_cpu	69843
RESULTS_SEARCH_5_time_duration	2091-12-22
RESULTS_SEARCH_5_version	5.0.2.5174
RESULTS_SEARCH_5_xml:id	SEARCH:1:636965525803682795_4
RESULTS_SEARCH_5_PARAMETERS_chemical_data_edited	FALSE
RESULTS_SEARCH_5_PARAMETERS_do_multiprecursor_search	TRUE
RESULTS_SEARCH_5_PARAMETERS_do_reverse_search	TRUE
RESULTS_SEARCH_5_PARAMETERS_max_quant_labels	35
RESULTS_SEARCH_5_PARAMETERS_maxresults	15
RESULTS_SEARCH_5_PARAMETERS_separate_searches	FALSE
RESULTS_SEARCH_5_PARAMETERS_MSTOLERANCE_type	dalton
RESULTS_SEARCH_5_PARAMETERS_MSTOLERANCE_value	0.05
RESULTS_SEARCH_5_PARAMETERS_MSMSTOLERANCE_type	dalton
RESULTS_SEARCH_5_PARAMETERS_MSMSTOLERANCE_value	0.1
RESULTS_SEARCH_5_PARAMETERS_MS_STANDARD_DEVIATION_type	dalton
RESULTS_SEARCH_5_PARAMETERS_MS_STANDARD_DEVIATION_value	0.0025
RESULTS_SEARCH_5_PARAMETERS_MSMS_STANDARD_DEVIATION_type	dalton
RESULTS_SEARCH_5_PARAMETERS_MSMS_STANDARD_DEVIATION_value	0.004
RESULTS_SEARCH_5_PARAMETERS_FASTA_filename	C:\AB SCIEX\ProteinPilot Data\SearchDatabases\2019_UP_Mouse_Con.fasta
RESULTS_SEARCH_5_PARAMETERS_AUTO_CALIBRATION_ms	TRUE
RESULTS_SEARCH_5_PARAMETERS_AUTO_CALIBRATION_msexport	FALSE
RESULTS_SEARCH_5_PARAMETERS_AUTO_CALIBRATION_msms	TRUE
RESULTS_SEARCH_5_PARAMETERS_AUTO_CALIBRATION_msmstolsdratio	3
RESULTS_SEARCH_5_PARAMETERS_AUTO_CALIBRATION_mstolsdratio	11
RESULTS_SEARCH_5_PARAMETERS_AUTO_CALIBRATION_squareroot	FALSE
RESULTS_SEARCH_5_PARAMETERS_AUTO_CALIBRATION_type	dalton
RESULTS_SEARCH_5_PARAMETERS_AUTO_CALIBRATION_MCP_d_s_s_f	0.0666667
RESULTS_SEARCH_5_PARAMETERS_AUTO_CALIBRATION_MCP_d_s_w_f	3
RESULTS_SEARCH_5_PARAMETERS_AUTO_CALIBRATION_MCP_m_f_r_mbc	200
RESULTS_SEARCH_5_PARAMETERS_AUTO_CALIBRATION_MCP_m_m_c	10
RESULTS_SEARCH_5_PARAMETERS_AUTO_CALIBRATION_MCP_m_m_f_s	0.25
RESULTS_SEARCH_5_PARAMETERS_AUTO_CALIBRATION_MCP_m_m_p_f	0.33
RESULTS_SEARCH_5_PARAMETERS_AUTO_CALIBRATION_MCP_m_m_p_rms_f	1
RESULTS_SEARCH_5_PARAMETERS_AUTO_CALIBRATION_MCP_m_p_t_f	1
RESULTS_SEARCH_5_PARAMETERS_AUTO_CALIBRATION_MCP_m_r_h_n_b	15
RESULTS_SEARCH_5_PARAMETERS_AUTO_CALIBRATION_MCP_m_z_n_s	99
RESULTS_SEARCH_5_PARAMETERS_AUTO_CALIBRATION_MCP_m_z_s_mn_f_r	0.0666667
RESULTS_SEARCH_5_PARAMETERS_AUTO_CALIBRATION_MCP_m_z_s_mx_f_r	0.1
RESULTS_SEARCH_5_PARAMETERS_MS_AUTO_CALIBRATION_OUT_avres	2.16918e-12
RESULTS_SEARCH_5_PARAMETERS_MS_AUTO_CALIBRATION_OUT_c0	0.00105908
RESULTS_SEARCH_5_PARAMETERS_MS_AUTO_CALIBRATION_OUT_c1minus1	-1.44075e-05
RESULTS_SEARCH_5_PARAMETERS_MS_AUTO_CALIBRATION_OUT_c2	0
RESULTS_SEARCH_5_PARAMETERS_MS_AUTO_CALIBRATION_OUT_file	2
RESULTS_SEARCH_5_PARAMETERS_MS_AUTO_CALIBRATION_OUT_partnumber	5
RESULTS_SEARCH_5_PARAMETERS_MS_AUTO_CALIBRATION_OUT_polyorder	1
RESULTS_SEARCH_5_PARAMETERS_MS_AUTO_CALIBRATION_OUT_sample	1
RESULTS_SEARCH_5_PARAMETERS_MS_AUTO_CALIBRATION_OUT_squareroot	FALSE
RESULTS_SEARCH_5_PARAMETERS_MSMS_AUTO_CALIBRATION_OUT_avres	-5.82908e-12
RESULTS_SEARCH_5_PARAMETERS_MSMS_AUTO_CALIBRATION_OUT_c0	-0.00104643
RESULTS_SEARCH_5_PARAMETERS_MSMS_AUTO_CALIBRATION_OUT_c1minus1	-8.09198e-06
RESULTS_SEARCH_5_PARAMETERS_MSMS_AUTO_CALIBRATION_OUT_c2	0
RESULTS_SEARCH_5_PARAMETERS_MSMS_AUTO_CALIBRATION_OUT_file	2
RESULTS_SEARCH_5_PARAMETERS_MSMS_AUTO_CALIBRATION_OUT_partnumber	5
RESULTS_SEARCH_5_PARAMETERS_MSMS_AUTO_CALIBRATION_OUT_polyorder	1
RESULTS_SEARCH_5_PARAMETERS_MSMS_AUTO_CALIBRATION_OUT_sample	1
RESULTS_SEARCH_5_PARAMETERS_MSMS_AUTO_CALIBRATION_OUT_squareroot	FALSE
RESULTS_SEARCH_5_PARAMETERS_MAX_PRECURSORS_FRAGLET	5
RESULTS_SEARCH_5_PARAMETERS_MAX_PRECURSORS_TAGLET	1
RESULTS_SEARCH_5_PARAMETERS_PRECURSORS_DR_FRAGLET	10
RESULTS_SEARCH_5_PARAMETERS_PRECURSORS_DR_TAGLET	3
RESULTS_SEARCH_5_PARAMETERS_DEFAULT_CHARGE_STATE_1_charge	1
RESULTS_SEARCH_5_PARAMETERS_DEFAULT_CHARGE_STATE_1_probability	1
RESULTS_SEARCH_5_PARAMETERS_DEFAULT_CHARGE_STATE_2_charge	2
RESULTS_SEARCH_5_PARAMETERS_DEFAULT_CHARGE_STATE_2_probability	1
RESULTS_SEARCH_5_PARAMETERS_DEFAULT_CHARGE_STATE_3_charge	3
RESULTS_SEARCH_5_PARAMETERS_DEFAULT_CHARGE_STATE_3_probability	1
RESULTS_SEARCH_5_PARAMETERS_VERSION	5.0.2.0, 5346
RESULTS_SEARCH_5_PARAMETERS_PARAGON_VERSION	5.0.2.0, 5174
RESULTS_SEARCH_5_PARAMETERS_APPLICATION	ProteinPilot(tm) Software
RESULTS_SEARCH_5_PARAMETERS_PROGROUP_alternativedispositionmaximumfoldprobabilitydrop	100
RESULTS_SEARCH_5_PARAMETERS_PROGROUP_alternativedispositionmaximumfoldscoredrop	2
RESULTS_SEARCH_5_PARAMETERS_PROGROUP_autodiscordantpeptidethreshold	0.3
RESULTS_SEARCH_5_PARAMETERS_PROGROUP_bayesconfidencecalclulation	TRUE
RESULTS_SEARCH_5_PARAMETERS_PROGROUP_calibrateconfidence	TRUE
RESULTS_SEARCH_5_PARAMETERS_PROGROUP_compresspeptides	FALSE
RESULTS_SEARCH_5_PARAMETERS_PROGROUP_confidencepercentthresholdforexcludingothersfromquant	15
RESULTS_SEARCH_5_PARAMETERS_PROGROUP_confidencepercentthresholdforincludingselfinquant	15
RESULTS_SEARCH_5_PARAMETERS_PROGROUP_donotstoremspeaklists	FALSE
RESULTS_SEARCH_5_PARAMETERS_PROGROUP_fasta	C:\AB SCIEX\ProteinPilot Data\SearchDatabases\2019_UP_Mouse_Con.fasta
RESULTS_SEARCH_5_PARAMETERS_PROGROUP_featuregroupminpepconf	0.66
RESULTS_SEARCH_5_PARAMETERS_PROGROUP_featuregroupminups	0.47
RESULTS_SEARCH_5_PARAMETERS_PROGROUP_focusingintersection	4
RESULTS_SEARCH_5_PARAMETERS_PROGROUP_focusingminimummatchconfidence	0.1
RESULTS_SEARCH_5_PARAMETERS_PROGROUP_focusingminunusedprotscore	0.1
RESULTS_SEARCH_5_PARAMETERS_PROGROUP_focusingsubsetcutoff	6
RESULTS_SEARCH_5_PARAMETERS_PROGROUP_intersection	1.3
RESULTS_SEARCH_5_PARAMETERS_PROGROUP_minimummatchconfidencecutoff	0.001
RESULTS_SEARCH_5_PARAMETERS_PROGROUP_minunusedprotscore	0.0458
RESULTS_SEARCH_5_PARAMETERS_PROGROUP_subsetcutoff	2
RESULTS_SEARCH_5_PARAMETERS_PROGROUP_uniprotservicehttpssupported	TRUE
RESULTS_SEARCH_5_PARAMETERS_PROGROUP_unusedprotscorethresholdforexcludingothersfromquant	1.3
RESULTS_SEARCH_5_PARAMETERS_PEAKLIST_count	3621
RESULTS_SEARCH_5_PARAMETERS_PEAKLIST_filenumber	2
RESULTS_SEARCH_5_PARAMETERS_PEAKLIST_original_count	3621
RESULTS_SEARCH_5_PARAMETERS_PEAKLIST_originalfilename	C:\Data\Flores_Mirales\06202019\mus2\06172019_AFlor_Cath_2_A2.mgf
RESULTS_SEARCH_5_PARAMETERS_PEAKLIST_partnumber	5
RESULTS_SEARCH_5_PARAMETERS_QUANT_TYPE_background_correction	FALSE
RESULTS_SEARCH_5_PARAMETERS_QUANT_TYPE_bias_correction	TRUE
RESULTS_SEARCH_5_PARAMETERS_QUANT_TYPE_keep_extreme_peptides_over_fraction	0
RESULTS_SEARCH_5_PARAMETERS_QUANT_TYPE_low_confidence_check	TRUE
RESULTS_SEARCH_5_PARAMETERS_QUANT_TYPE_low_intensity_check	TRUE
RESULTS_SEARCH_5_PARAMETERS_QUANT_TYPE_median_statistic	TRUE
RESULTS_SEARCH_5_PARAMETERS_QUANT_TYPE_mod_check	TRUE
RESULTS_SEARCH_5_PARAMETERS_QUANT_TYPE_quant_threshold	-1
RESULTS_SEARCH_5_PARAMETERS_QUANT_TYPE_quant_threshold_sn	9
RESULTS_SEARCH_5_PARAMETERS_QUANT_TYPE_separate_searches	FALSE
RESULTS_SEARCH_5_PARAMETERS_QUANT_TYPE_shared_msms_check	TRUE
RESULTS_SEARCH_5_PARAMETERS_PARAGON_METHOD_SETTINGS_UI_SAMPLE_TYPE	Identification
RESULTS_SEARCH_5_PARAMETERS_PARAGON_METHOD_SETTINGS_UI_CYS_ALKYLATION	Iodoacetamide
RESULTS_SEARCH_5_PARAMETERS_PARAGON_METHOD_SETTINGS_UI_DIGESTION	Trypsin
RESULTS_SEARCH_5_PARAMETERS_PARAGON_METHOD_SETTINGS_UI_INSTRUMENT	Orbi MS (1-3ppm), Orbi MS/MS
RESULTS_SEARCH_5_PARAMETERS_PARAGON_METHOD_SETTINGS_UI_SEARCH_EFFORT	Rapid
RESULTS_SEARCH_5_PARAMETERS_PARAGON_METHOD_SETTINGS_UI_USER_NAME	ESC308585\MSPF
RESULTS_SEARCH_5_PARAMETERS_PARAGON_METHOD_SETTINGS_UI_MACHINE_NAME	ESC308585
RESULTS_SEARCH_5_PARAMETERS_PARAGON_METHOD_SETTINGS_UI_SEARCH_ID	6.36966e+17
RESULTS_SEARCH_5_PARAMETERS_PARAGON_METHOD_SETTINGS_UI_START_TIME	2019-06-19 14:49:40
RESULTS_SEARCH_5_PARAMETERS_PARAGON_METHOD_SETTINGS_UI_MIN_UNUSED_PROTSCORE	0.0458
RESULTS_SEARCH_5_PARAMETERS_PARAGON_METHOD_SETTINGS_UI_PSPEP	TRUE
RESULTS_SEARCH_6_time_cpu	66718
RESULTS_SEARCH_6_time_duration	66987
RESULTS_SEARCH_6_version	5.0.2.5174
RESULTS_SEARCH_6_xml:id	SEARCH:1:636965525803682795_5
RESULTS_SEARCH_6_PARAMETERS_chemical_data_edited	FALSE
RESULTS_SEARCH_6_PARAMETERS_do_multiprecursor_search	TRUE
RESULTS_SEARCH_6_PARAMETERS_do_reverse_search	TRUE
RESULTS_SEARCH_6_PARAMETERS_max_quant_labels	35
RESULTS_SEARCH_6_PARAMETERS_maxresults	15
RESULTS_SEARCH_6_PARAMETERS_separate_searches	FALSE
RESULTS_SEARCH_6_PARAMETERS_MSTOLERANCE_type	dalton
RESULTS_SEARCH_6_PARAMETERS_MSTOLERANCE_value	0.05
RESULTS_SEARCH_6_PARAMETERS_MSMSTOLERANCE_type	dalton
RESULTS_SEARCH_6_PARAMETERS_MSMSTOLERANCE_value	0.1
RESULTS_SEARCH_6_PARAMETERS_MS_STANDARD_DEVIATION_type	dalton
RESULTS_SEARCH_6_PARAMETERS_MS_STANDARD_DEVIATION_value	0.0025
RESULTS_SEARCH_6_PARAMETERS_MSMS_STANDARD_DEVIATION_type	dalton
RESULTS_SEARCH_6_PARAMETERS_MSMS_STANDARD_DEVIATION_value	0.004
RESULTS_SEARCH_6_PARAMETERS_FASTA_filename	C:\AB SCIEX\ProteinPilot Data\SearchDatabases\2019_UP_Mouse_Con.fasta
RESULTS_SEARCH_6_PARAMETERS_AUTO_CALIBRATION_ms	TRUE
RESULTS_SEARCH_6_PARAMETERS_AUTO_CALIBRATION_msexport	FALSE
RESULTS_SEARCH_6_PARAMETERS_AUTO_CALIBRATION_msms	TRUE
RESULTS_SEARCH_6_PARAMETERS_AUTO_CALIBRATION_msmstolsdratio	3
RESULTS_SEARCH_6_PARAMETERS_AUTO_CALIBRATION_mstolsdratio	11
RESULTS_SEARCH_6_PARAMETERS_AUTO_CALIBRATION_squareroot	FALSE
RESULTS_SEARCH_6_PARAMETERS_AUTO_CALIBRATION_type	dalton
RESULTS_SEARCH_6_PARAMETERS_AUTO_CALIBRATION_MCP_d_s_s_f	0.0666667
RESULTS_SEARCH_6_PARAMETERS_AUTO_CALIBRATION_MCP_d_s_w_f	3
RESULTS_SEARCH_6_PARAMETERS_AUTO_CALIBRATION_MCP_m_f_r_mbc	200
RESULTS_SEARCH_6_PARAMETERS_AUTO_CALIBRATION_MCP_m_m_c	10
RESULTS_SEARCH_6_PARAMETERS_AUTO_CALIBRATION_MCP_m_m_f_s	0.25
RESULTS_SEARCH_6_PARAMETERS_AUTO_CALIBRATION_MCP_m_m_p_f	0.33
RESULTS_SEARCH_6_PARAMETERS_AUTO_CALIBRATION_MCP_m_m_p_rms_f	1
RESULTS_SEARCH_6_PARAMETERS_AUTO_CALIBRATION_MCP_m_p_t_f	1
RESULTS_SEARCH_6_PARAMETERS_AUTO_CALIBRATION_MCP_m_r_h_n_b	15
RESULTS_SEARCH_6_PARAMETERS_AUTO_CALIBRATION_MCP_m_z_n_s	99
RESULTS_SEARCH_6_PARAMETERS_AUTO_CALIBRATION_MCP_m_z_s_mn_f_r	0.0666667
RESULTS_SEARCH_6_PARAMETERS_AUTO_CALIBRATION_MCP_m_z_s_mx_f_r	0.1
RESULTS_SEARCH_6_PARAMETERS_MS_AUTO_CALIBRATION_OUT_avres	-2.82687e-12
RESULTS_SEARCH_6_PARAMETERS_MS_AUTO_CALIBRATION_OUT_c0	-0.00130281
RESULTS_SEARCH_6_PARAMETERS_MS_AUTO_CALIBRATION_OUT_c1minus1	-1.20683e-05
RESULTS_SEARCH_6_PARAMETERS_MS_AUTO_CALIBRATION_OUT_c2	0
RESULTS_SEARCH_6_PARAMETERS_MS_AUTO_CALIBRATION_OUT_file	2
RESULTS_SEARCH_6_PARAMETERS_MS_AUTO_CALIBRATION_OUT_partnumber	6
RESULTS_SEARCH_6_PARAMETERS_MS_AUTO_CALIBRATION_OUT_polyorder	1
RESULTS_SEARCH_6_PARAMETERS_MS_AUTO_CALIBRATION_OUT_sample	1
RESULTS_SEARCH_6_PARAMETERS_MS_AUTO_CALIBRATION_OUT_squareroot	FALSE
RESULTS_SEARCH_6_PARAMETERS_MSMS_AUTO_CALIBRATION_OUT_avres	2.55639e-11
RESULTS_SEARCH_6_PARAMETERS_MSMS_AUTO_CALIBRATION_OUT_c0	-0.00226457
RESULTS_SEARCH_6_PARAMETERS_MSMS_AUTO_CALIBRATION_OUT_c1minus1	-6.00572e-06
RESULTS_SEARCH_6_PARAMETERS_MSMS_AUTO_CALIBRATION_OUT_c2	0
RESULTS_SEARCH_6_PARAMETERS_MSMS_AUTO_CALIBRATION_OUT_file	2
RESULTS_SEARCH_6_PARAMETERS_MSMS_AUTO_CALIBRATION_OUT_partnumber	6
RESULTS_SEARCH_6_PARAMETERS_MSMS_AUTO_CALIBRATION_OUT_polyorder	1
RESULTS_SEARCH_6_PARAMETERS_MSMS_AUTO_CALIBRATION_OUT_sample	1
RESULTS_SEARCH_6_PARAMETERS_MSMS_AUTO_CALIBRATION_OUT_squareroot	FALSE
RESULTS_SEARCH_6_PARAMETERS_MAX_PRECURSORS_FRAGLET	5
RESULTS_SEARCH_6_PARAMETERS_MAX_PRECURSORS_TAGLET	1
RESULTS_SEARCH_6_PARAMETERS_PRECURSORS_DR_FRAGLET	10
RESULTS_SEARCH_6_PARAMETERS_PRECURSORS_DR_TAGLET	3
RESULTS_SEARCH_6_PARAMETERS_DEFAULT_CHARGE_STATE_1_charge	1
RESULTS_SEARCH_6_PARAMETERS_DEFAULT_CHARGE_STATE_1_probability	1
RESULTS_SEARCH_6_PARAMETERS_DEFAULT_CHARGE_STATE_2_charge	2
RESULTS_SEARCH_6_PARAMETERS_DEFAULT_CHARGE_STATE_2_probability	1
RESULTS_SEARCH_6_PARAMETERS_DEFAULT_CHARGE_STATE_3_charge	3
RESULTS_SEARCH_6_PARAMETERS_DEFAULT_CHARGE_STATE_3_probability	1
RESULTS_SEARCH_6_PARAMETERS_VERSION	5.0.2.0, 5346
RESULTS_SEARCH_6_PARAMETERS_PARAGON_VERSION	5.0.2.0, 5174
RESULTS_SEARCH_6_PARAMETERS_APPLICATION	ProteinPilot(tm) Software
RESULTS_SEARCH_6_PARAMETERS_PROGROUP_alternativedispositionmaximumfoldprobabilitydrop	100
RESULTS_SEARCH_6_PARAMETERS_PROGROUP_alternativedispositionmaximumfoldscoredrop	2
RESULTS_SEARCH_6_PARAMETERS_PROGROUP_autodiscordantpeptidethreshold	07:12:00
RESULTS_SEARCH_6_PARAMETERS_PROGROUP_bayesconfidencecalclulation	TRUE
RESULTS_SEARCH_6_PARAMETERS_PROGROUP_calibrateconfidence	TRUE
RESULTS_SEARCH_6_PARAMETERS_PROGROUP_compresspeptides	FALSE
RESULTS_SEARCH_6_PARAMETERS_PROGROUP_confidencepercentthresholdforexcludingothersfromquant	15
RESULTS_SEARCH_6_PARAMETERS_PROGROUP_confidencepercentthresholdforincludingselfinquant	15
RESULTS_SEARCH_6_PARAMETERS_PROGROUP_donotstoremspeaklists	FALSE
RESULTS_SEARCH_6_PARAMETERS_PROGROUP_fasta	C:\AB SCIEX\ProteinPilot Data\SearchDatabases\2019_UP_Mouse_Con.fasta
RESULTS_SEARCH_6_PARAMETERS_PROGROUP_featuregroupminpepconf	0.66
RESULTS_SEARCH_6_PARAMETERS_PROGROUP_featuregroupminups	0.47
RESULTS_SEARCH_6_PARAMETERS_PROGROUP_focusingintersection	4
RESULTS_SEARCH_6_PARAMETERS_PROGROUP_focusingminimummatchconfidence	0.1
RESULTS_SEARCH_6_PARAMETERS_PROGROUP_focusingminunusedprotscore	0.1
RESULTS_SEARCH_6_PARAMETERS_PROGROUP_focusingsubsetcutoff	6
RESULTS_SEARCH_6_PARAMETERS_PROGROUP_intersection	1.3
RESULTS_SEARCH_6_PARAMETERS_PROGROUP_minimummatchconfidencecutoff	0.001
RESULTS_SEARCH_6_PARAMETERS_PROGROUP_minunusedprotscore	0.0458
RESULTS_SEARCH_6_PARAMETERS_PROGROUP_subsetcutoff	2
RESULTS_SEARCH_6_PARAMETERS_PROGROUP_uniprotservicehttpssupported	TRUE
RESULTS_SEARCH_6_PARAMETERS_PROGROUP_unusedprotscorethresholdforexcludingothersfromquant	1.3
RESULTS_SEARCH_6_PARAMETERS_PEAKLIST_count	3635
RESULTS_SEARCH_6_PARAMETERS_PEAKLIST_filenumber	2
RESULTS_SEARCH_6_PARAMETERS_PEAKLIST_original_count	3635
RESULTS_SEARCH_6_PARAMETERS_PEAKLIST_originalfilename	C:\Data\Flores_Mirales\06202019\mus2\06172019_AFlor_Cath_2_A2.mgf
RESULTS_SEARCH_6_PARAMETERS_PEAKLIST_partnumber	6
RESULTS_SEARCH_6_PARAMETERS_QUANT_TYPE_background_correction	FALSE
RESULTS_SEARCH_6_PARAMETERS_QUANT_TYPE_bias_correction	TRUE
RESULTS_SEARCH_6_PARAMETERS_QUANT_TYPE_keep_extreme_peptides_over_fraction	0
RESULTS_SEARCH_6_PARAMETERS_QUANT_TYPE_low_confidence_check	TRUE
RESULTS_SEARCH_6_PARAMETERS_QUANT_TYPE_low_intensity_check	TRUE
RESULTS_SEARCH_6_PARAMETERS_QUANT_TYPE_median_statistic	TRUE
RESULTS_SEARCH_6_PARAMETERS_QUANT_TYPE_mod_check	TRUE
RESULTS_SEARCH_6_PARAMETERS_QUANT_TYPE_quant_threshold	-1
RESULTS_SEARCH_6_PARAMETERS_QUANT_TYPE_quant_threshold_sn	9
RESULTS_SEARCH_6_PARAMETERS_QUANT_TYPE_separate_searches	FALSE
RESULTS_SEARCH_6_PARAMETERS_QUANT_TYPE_shared_msms_check	TRUE
RESULTS_SEARCH_6_PARAMETERS_PARAGON_METHOD_SETTINGS_UI_SAMPLE_TYPE	Identification
RESULTS_SEARCH_6_PARAMETERS_PARAGON_METHOD_SETTINGS_UI_CYS_ALKYLATION	Iodoacetamide
RESULTS_SEARCH_6_PARAMETERS_PARAGON_METHOD_SETTINGS_UI_DIGESTION	Trypsin
RESULTS_SEARCH_6_PARAMETERS_PARAGON_METHOD_SETTINGS_UI_INSTRUMENT	Orbi MS (1-3ppm), Orbi MS/MS
RESULTS_SEARCH_6_PARAMETERS_PARAGON_METHOD_SETTINGS_UI_SEARCH_EFFORT	Rapid
RESULTS_SEARCH_6_PARAMETERS_PARAGON_METHOD_SETTINGS_UI_USER_NAME	ESC308585\MSPF
RESULTS_SEARCH_6_PARAMETERS_PARAGON_METHOD_SETTINGS_UI_MACHINE_NAME	ESC308585
RESULTS_SEARCH_6_PARAMETERS_PARAGON_METHOD_SETTINGS_UI_SEARCH_ID	6.36966e+17
RESULTS_SEARCH_6_PARAMETERS_PARAGON_METHOD_SETTINGS_UI_START_TIME	2019-06-19 14:49:40
RESULTS_SEARCH_6_PARAMETERS_PARAGON_METHOD_SETTINGS_UI_MIN_UNUSED_PROTSCORE	0.0458
RESULTS_SEARCH_6_PARAMETERS_PARAGON_METHOD_SETTINGS_UI_PSPEP	TRUE
RESULTS_SEARCH_7_time_cpu	2062-05-21
RESULTS_SEARCH_7_time_duration	2063-01-20
RESULTS_SEARCH_7_version	5.0.2.5174
RESULTS_SEARCH_7_xml:id	SEARCH:1:636965525803682795_6
RESULTS_SEARCH_7_PARAMETERS_chemical_data_edited	FALSE
RESULTS_SEARCH_7_PARAMETERS_do_multiprecursor_search	TRUE
RESULTS_SEARCH_7_PARAMETERS_do_reverse_search	TRUE
RESULTS_SEARCH_7_PARAMETERS_max_quant_labels	35
RESULTS_SEARCH_7_PARAMETERS_maxresults	15
RESULTS_SEARCH_7_PARAMETERS_separate_searches	FALSE
RESULTS_SEARCH_7_PARAMETERS_MSTOLERANCE_type	dalton
RESULTS_SEARCH_7_PARAMETERS_MSTOLERANCE_value	0.05
RESULTS_SEARCH_7_PARAMETERS_MSMSTOLERANCE_type	dalton
RESULTS_SEARCH_7_PARAMETERS_MSMSTOLERANCE_value	0.1
RESULTS_SEARCH_7_PARAMETERS_MS_STANDARD_DEVIATION_type	dalton
RESULTS_SEARCH_7_PARAMETERS_MS_STANDARD_DEVIATION_value	0.0025
RESULTS_SEARCH_7_PARAMETERS_MSMS_STANDARD_DEVIATION_type	dalton
RESULTS_SEARCH_7_PARAMETERS_MSMS_STANDARD_DEVIATION_value	0.004
RESULTS_SEARCH_7_PARAMETERS_FASTA_filename	C:\AB SCIEX\ProteinPilot Data\SearchDatabases\2019_UP_Mouse_Con.fasta
RESULTS_SEARCH_7_PARAMETERS_AUTO_CALIBRATION_ms	TRUE
RESULTS_SEARCH_7_PARAMETERS_AUTO_CALIBRATION_msexport	FALSE
RESULTS_SEARCH_7_PARAMETERS_AUTO_CALIBRATION_msms	TRUE
RESULTS_SEARCH_7_PARAMETERS_AUTO_CALIBRATION_msmstolsdratio	3
RESULTS_SEARCH_7_PARAMETERS_AUTO_CALIBRATION_mstolsdratio	11
RESULTS_SEARCH_7_PARAMETERS_AUTO_CALIBRATION_squareroot	FALSE
RESULTS_SEARCH_7_PARAMETERS_AUTO_CALIBRATION_type	dalton
RESULTS_SEARCH_7_PARAMETERS_AUTO_CALIBRATION_MCP_d_s_s_f	0.0666667
RESULTS_SEARCH_7_PARAMETERS_AUTO_CALIBRATION_MCP_d_s_w_f	3
RESULTS_SEARCH_7_PARAMETERS_AUTO_CALIBRATION_MCP_m_f_r_mbc	200
RESULTS_SEARCH_7_PARAMETERS_AUTO_CALIBRATION_MCP_m_m_c	10
RESULTS_SEARCH_7_PARAMETERS_AUTO_CALIBRATION_MCP_m_m_f_s	0.25
RESULTS_SEARCH_7_PARAMETERS_AUTO_CALIBRATION_MCP_m_m_p_f	0.33
RESULTS_SEARCH_7_PARAMETERS_AUTO_CALIBRATION_MCP_m_m_p_rms_f	1
RESULTS_SEARCH_7_PARAMETERS_AUTO_CALIBRATION_MCP_m_p_t_f	1
RESULTS_SEARCH_7_PARAMETERS_AUTO_CALIBRATION_MCP_m_r_h_n_b	15
RESULTS_SEARCH_7_PARAMETERS_AUTO_CALIBRATION_MCP_m_z_n_s	99
RESULTS_SEARCH_7_PARAMETERS_AUTO_CALIBRATION_MCP_m_z_s_mn_f_r	0.0666667
RESULTS_SEARCH_7_PARAMETERS_AUTO_CALIBRATION_MCP_m_z_s_mx_f_r	0.1
RESULTS_SEARCH_7_PARAMETERS_MS_AUTO_CALIBRATION_OUT_avres	-8.03928e-13
RESULTS_SEARCH_7_PARAMETERS_MS_AUTO_CALIBRATION_OUT_c0	-0.00169449
RESULTS_SEARCH_7_PARAMETERS_MS_AUTO_CALIBRATION_OUT_c1minus1	-1.1924e-05
RESULTS_SEARCH_7_PARAMETERS_MS_AUTO_CALIBRATION_OUT_c2	0
RESULTS_SEARCH_7_PARAMETERS_MS_AUTO_CALIBRATION_OUT_file	2
RESULTS_SEARCH_7_PARAMETERS_MS_AUTO_CALIBRATION_OUT_partnumber	7
RESULTS_SEARCH_7_PARAMETERS_MS_AUTO_CALIBRATION_OUT_polyorder	1
RESULTS_SEARCH_7_PARAMETERS_MS_AUTO_CALIBRATION_OUT_sample	1
RESULTS_SEARCH_7_PARAMETERS_MS_AUTO_CALIBRATION_OUT_squareroot	FALSE
RESULTS_SEARCH_7_PARAMETERS_MSMS_AUTO_CALIBRATION_OUT_avres	1.93263e-10
RESULTS_SEARCH_7_PARAMETERS_MSMS_AUTO_CALIBRATION_OUT_c0	-0.00287803
RESULTS_SEARCH_7_PARAMETERS_MSMS_AUTO_CALIBRATION_OUT_c1minus1	-4.30907e-06
RESULTS_SEARCH_7_PARAMETERS_MSMS_AUTO_CALIBRATION_OUT_c2	0
RESULTS_SEARCH_7_PARAMETERS_MSMS_AUTO_CALIBRATION_OUT_file	2
RESULTS_SEARCH_7_PARAMETERS_MSMS_AUTO_CALIBRATION_OUT_partnumber	7
RESULTS_SEARCH_7_PARAMETERS_MSMS_AUTO_CALIBRATION_OUT_polyorder	1
RESULTS_SEARCH_7_PARAMETERS_MSMS_AUTO_CALIBRATION_OUT_sample	1
RESULTS_SEARCH_7_PARAMETERS_MSMS_AUTO_CALIBRATION_OUT_squareroot	FALSE
RESULTS_SEARCH_7_PARAMETERS_MAX_PRECURSORS_FRAGLET	5
RESULTS_SEARCH_7_PARAMETERS_MAX_PRECURSORS_TAGLET	1
RESULTS_SEARCH_7_PARAMETERS_PRECURSORS_DR_FRAGLET	10
RESULTS_SEARCH_7_PARAMETERS_PRECURSORS_DR_TAGLET	3
RESULTS_SEARCH_7_PARAMETERS_DEFAULT_CHARGE_STATE_1_charge	1
RESULTS_SEARCH_7_PARAMETERS_DEFAULT_CHARGE_STATE_1_probability	1
RESULTS_SEARCH_7_PARAMETERS_DEFAULT_CHARGE_STATE_2_charge	2
RESULTS_SEARCH_7_PARAMETERS_DEFAULT_CHARGE_STATE_2_probability	1
RESULTS_SEARCH_7_PARAMETERS_DEFAULT_CHARGE_STATE_3_charge	3
RESULTS_SEARCH_7_PARAMETERS_DEFAULT_CHARGE_STATE_3_probability	1
RESULTS_SEARCH_7_PARAMETERS_VERSION	5.0.2.0, 5346
RESULTS_SEARCH_7_PARAMETERS_PARAGON_VERSION	5.0.2.0, 5174
RESULTS_SEARCH_7_PARAMETERS_APPLICATION	ProteinPilot(tm) Software
RESULTS_SEARCH_7_PARAMETERS_PROGROUP_alternativedispositionmaximumfoldprobabilitydrop	100
RESULTS_SEARCH_7_PARAMETERS_PROGROUP_alternativedispositionmaximumfoldscoredrop	2
RESULTS_SEARCH_7_PARAMETERS_PROGROUP_autodiscordantpeptidethreshold	0.3
RESULTS_SEARCH_7_PARAMETERS_PROGROUP_bayesconfidencecalclulation	TRUE
RESULTS_SEARCH_7_PARAMETERS_PROGROUP_calibrateconfidence	TRUE
RESULTS_SEARCH_7_PARAMETERS_PROGROUP_compresspeptides	FALSE
RESULTS_SEARCH_7_PARAMETERS_PROGROUP_confidencepercentthresholdforexcludingothersfromquant	15
RESULTS_SEARCH_7_PARAMETERS_PROGROUP_confidencepercentthresholdforincludingselfinquant	15
RESULTS_SEARCH_7_PARAMETERS_PROGROUP_donotstoremspeaklists	FALSE
RESULTS_SEARCH_7_PARAMETERS_PROGROUP_fasta	C:\AB SCIEX\ProteinPilot Data\SearchDatabases\2019_UP_Mouse_Con.fasta
RESULTS_SEARCH_7_PARAMETERS_PROGROUP_featuregroupminpepconf	0.66
RESULTS_SEARCH_7_PARAMETERS_PROGROUP_featuregroupminups	0.47
RESULTS_SEARCH_7_PARAMETERS_PROGROUP_focusingintersection	4
RESULTS_SEARCH_7_PARAMETERS_PROGROUP_focusingminimummatchconfidence	0.1
RESULTS_SEARCH_7_PARAMETERS_PROGROUP_focusingminunusedprotscore	0.1
RESULTS_SEARCH_7_PARAMETERS_PROGROUP_focusingsubsetcutoff	6
RESULTS_SEARCH_7_PARAMETERS_PROGROUP_intersection	1.3
RESULTS_SEARCH_7_PARAMETERS_PROGROUP_minimummatchconfidencecutoff	0.001
RESULTS_SEARCH_7_PARAMETERS_PROGROUP_minunusedprotscore	0.0458
RESULTS_SEARCH_7_PARAMETERS_PROGROUP_subsetcutoff	2
RESULTS_SEARCH_7_PARAMETERS_PROGROUP_uniprotservicehttpssupported	TRUE
RESULTS_SEARCH_7_PARAMETERS_PROGROUP_unusedprotscorethresholdforexcludingothersfromquant	1.3
RESULTS_SEARCH_7_PARAMETERS_PEAKLIST_count	3646
RESULTS_SEARCH_7_PARAMETERS_PEAKLIST_filenumber	2
RESULTS_SEARCH_7_PARAMETERS_PEAKLIST_original_count	3646
RESULTS_SEARCH_7_PARAMETERS_PEAKLIST_originalfilename	C:\Data\Flores_Mirales\06202019\mus2\06172019_AFlor_Cath_2_A2.mgf
RESULTS_SEARCH_7_PARAMETERS_PEAKLIST_partnumber	7
RESULTS_SEARCH_7_PARAMETERS_QUANT_TYPE_background_correction	FALSE
RESULTS_SEARCH_7_PARAMETERS_QUANT_TYPE_bias_correction	TRUE
RESULTS_SEARCH_7_PARAMETERS_QUANT_TYPE_keep_extreme_peptides_over_fraction	0
RESULTS_SEARCH_7_PARAMETERS_QUANT_TYPE_low_confidence_check	TRUE
RESULTS_SEARCH_7_PARAMETERS_QUANT_TYPE_low_intensity_check	TRUE
RESULTS_SEARCH_7_PARAMETERS_QUANT_TYPE_median_statistic	TRUE
RESULTS_SEARCH_7_PARAMETERS_QUANT_TYPE_mod_check	TRUE
RESULTS_SEARCH_7_PARAMETERS_QUANT_TYPE_quant_threshold	-1
RESULTS_SEARCH_7_PARAMETERS_QUANT_TYPE_quant_threshold_sn	9
RESULTS_SEARCH_7_PARAMETERS_QUANT_TYPE_separate_searches	FALSE
RESULTS_SEARCH_7_PARAMETERS_QUANT_TYPE_shared_msms_check	TRUE
RESULTS_SEARCH_7_PARAMETERS_PARAGON_METHOD_SETTINGS_UI_SAMPLE_TYPE	Identification
RESULTS_SEARCH_7_PARAMETERS_PARAGON_METHOD_SETTINGS_UI_CYS_ALKYLATION	Iodoacetamide
RESULTS_SEARCH_7_PARAMETERS_PARAGON_METHOD_SETTINGS_UI_DIGESTION	Trypsin
RESULTS_SEARCH_7_PARAMETERS_PARAGON_METHOD_SETTINGS_UI_INSTRUMENT	Orbi MS (1-3ppm), Orbi MS/MS
RESULTS_SEARCH_7_PARAMETERS_PARAGON_METHOD_SETTINGS_UI_SEARCH_EFFORT	Rapid
RESULTS_SEARCH_7_PARAMETERS_PARAGON_METHOD_SETTINGS_UI_USER_NAME	ESC308585\MSPF
RESULTS_SEARCH_7_PARAMETERS_PARAGON_METHOD_SETTINGS_UI_MACHINE_NAME	ESC308585
RESULTS_SEARCH_7_PARAMETERS_PARAGON_METHOD_SETTINGS_UI_SEARCH_ID	6.36966e+17
RESULTS_SEARCH_7_PARAMETERS_PARAGON_METHOD_SETTINGS_UI_START_TIME	2019-06-19 14:49:40
RESULTS_SEARCH_7_PARAMETERS_PARAGON_METHOD_SETTINGS_UI_MIN_UNUSED_PROTSCORE	0.0458
RESULTS_SEARCH_7_PARAMETERS_PARAGON_METHOD_SETTINGS_UI_PSPEP	TRUE
RESULTS_SEARCH_8_time_cpu	49265
RESULTS_SEARCH_8_time_duration	49394
RESULTS_SEARCH_8_version	5.0.2.5174
RESULTS_SEARCH_8_xml:id	SEARCH:1:636965525803682795_7
RESULTS_SEARCH_8_PARAMETERS_chemical_data_edited	FALSE
RESULTS_SEARCH_8_PARAMETERS_do_multiprecursor_search	TRUE
RESULTS_SEARCH_8_PARAMETERS_do_reverse_search	TRUE
RESULTS_SEARCH_8_PARAMETERS_max_quant_labels	35
RESULTS_SEARCH_8_PARAMETERS_maxresults	15
RESULTS_SEARCH_8_PARAMETERS_separate_searches	FALSE
RESULTS_SEARCH_8_PARAMETERS_MSTOLERANCE_type	dalton
RESULTS_SEARCH_8_PARAMETERS_MSTOLERANCE_value	0.05
RESULTS_SEARCH_8_PARAMETERS_MSMSTOLERANCE_type	dalton
RESULTS_SEARCH_8_PARAMETERS_MSMSTOLERANCE_value	0.1
RESULTS_SEARCH_8_PARAMETERS_MS_STANDARD_DEVIATION_type	dalton
RESULTS_SEARCH_8_PARAMETERS_MS_STANDARD_DEVIATION_value	0.0025
RESULTS_SEARCH_8_PARAMETERS_MSMS_STANDARD_DEVIATION_type	dalton
RESULTS_SEARCH_8_PARAMETERS_MSMS_STANDARD_DEVIATION_value	0.004
RESULTS_SEARCH_8_PARAMETERS_FASTA_filename	C:\AB SCIEX\ProteinPilot Data\SearchDatabases\2019_UP_Mouse_Con.fasta
RESULTS_SEARCH_8_PARAMETERS_AUTO_CALIBRATION_ms	TRUE
RESULTS_SEARCH_8_PARAMETERS_AUTO_CALIBRATION_msexport	FALSE
RESULTS_SEARCH_8_PARAMETERS_AUTO_CALIBRATION_msms	TRUE
RESULTS_SEARCH_8_PARAMETERS_AUTO_CALIBRATION_msmstolsdratio	3
RESULTS_SEARCH_8_PARAMETERS_AUTO_CALIBRATION_mstolsdratio	11
RESULTS_SEARCH_8_PARAMETERS_AUTO_CALIBRATION_squareroot	FALSE
RESULTS_SEARCH_8_PARAMETERS_AUTO_CALIBRATION_type	dalton
RESULTS_SEARCH_8_PARAMETERS_AUTO_CALIBRATION_MCP_d_s_s_f	0.0666667
RESULTS_SEARCH_8_PARAMETERS_AUTO_CALIBRATION_MCP_d_s_w_f	3
RESULTS_SEARCH_8_PARAMETERS_AUTO_CALIBRATION_MCP_m_f_r_mbc	200
RESULTS_SEARCH_8_PARAMETERS_AUTO_CALIBRATION_MCP_m_m_c	10
RESULTS_SEARCH_8_PARAMETERS_AUTO_CALIBRATION_MCP_m_m_f_s	0.25
RESULTS_SEARCH_8_PARAMETERS_AUTO_CALIBRATION_MCP_m_m_p_f	0.33
RESULTS_SEARCH_8_PARAMETERS_AUTO_CALIBRATION_MCP_m_m_p_rms_f	1
RESULTS_SEARCH_8_PARAMETERS_AUTO_CALIBRATION_MCP_m_p_t_f	1
RESULTS_SEARCH_8_PARAMETERS_AUTO_CALIBRATION_MCP_m_r_h_n_b	15
RESULTS_SEARCH_8_PARAMETERS_AUTO_CALIBRATION_MCP_m_z_n_s	99
RESULTS_SEARCH_8_PARAMETERS_AUTO_CALIBRATION_MCP_m_z_s_mn_f_r	0.0666667
RESULTS_SEARCH_8_PARAMETERS_AUTO_CALIBRATION_MCP_m_z_s_mx_f_r	0.1
RESULTS_SEARCH_8_PARAMETERS_MS_AUTO_CALIBRATION_OUT_avres	3.81061e-13
RESULTS_SEARCH_8_PARAMETERS_MS_AUTO_CALIBRATION_OUT_c0	-0.000286756
RESULTS_SEARCH_8_PARAMETERS_MS_AUTO_CALIBRATION_OUT_c1minus1	-1.24674e-05
RESULTS_SEARCH_8_PARAMETERS_MS_AUTO_CALIBRATION_OUT_c2	0
RESULTS_SEARCH_8_PARAMETERS_MS_AUTO_CALIBRATION_OUT_file	2
RESULTS_SEARCH_8_PARAMETERS_MS_AUTO_CALIBRATION_OUT_partnumber	8
RESULTS_SEARCH_8_PARAMETERS_MS_AUTO_CALIBRATION_OUT_polyorder	1
RESULTS_SEARCH_8_PARAMETERS_MS_AUTO_CALIBRATION_OUT_sample	1
RESULTS_SEARCH_8_PARAMETERS_MS_AUTO_CALIBRATION_OUT_squareroot	FALSE
RESULTS_SEARCH_8_PARAMETERS_MSMS_AUTO_CALIBRATION_OUT_avres	-3.79869e-08
RESULTS_SEARCH_8_PARAMETERS_MSMS_AUTO_CALIBRATION_OUT_c0	-0.00308616
RESULTS_SEARCH_8_PARAMETERS_MSMS_AUTO_CALIBRATION_OUT_c1minus1	-3.50192e-06
RESULTS_SEARCH_8_PARAMETERS_MSMS_AUTO_CALIBRATION_OUT_c2	0
RESULTS_SEARCH_8_PARAMETERS_MSMS_AUTO_CALIBRATION_OUT_file	2
RESULTS_SEARCH_8_PARAMETERS_MSMS_AUTO_CALIBRATION_OUT_partnumber	8
RESULTS_SEARCH_8_PARAMETERS_MSMS_AUTO_CALIBRATION_OUT_polyorder	1
RESULTS_SEARCH_8_PARAMETERS_MSMS_AUTO_CALIBRATION_OUT_sample	1
RESULTS_SEARCH_8_PARAMETERS_MSMS_AUTO_CALIBRATION_OUT_squareroot	FALSE
RESULTS_SEARCH_8_PARAMETERS_MAX_PRECURSORS_FRAGLET	5
RESULTS_SEARCH_8_PARAMETERS_MAX_PRECURSORS_TAGLET	1
RESULTS_SEARCH_8_PARAMETERS_PRECURSORS_DR_FRAGLET	10
RESULTS_SEARCH_8_PARAMETERS_PRECURSORS_DR_TAGLET	3
RESULTS_SEARCH_8_PARAMETERS_DEFAULT_CHARGE_STATE_1_charge	1
RESULTS_SEARCH_8_PARAMETERS_DEFAULT_CHARGE_STATE_1_probability	1
RESULTS_SEARCH_8_PARAMETERS_DEFAULT_CHARGE_STATE_2_charge	2
RESULTS_SEARCH_8_PARAMETERS_DEFAULT_CHARGE_STATE_2_probability	1
RESULTS_SEARCH_8_PARAMETERS_DEFAULT_CHARGE_STATE_3_charge	3
RESULTS_SEARCH_8_PARAMETERS_DEFAULT_CHARGE_STATE_3_probability	1
RESULTS_SEARCH_8_PARAMETERS_VERSION	5.0.2.0, 5346
RESULTS_SEARCH_8_PARAMETERS_PARAGON_VERSION	5.0.2.0, 5174
RESULTS_SEARCH_8_PARAMETERS_APPLICATION	ProteinPilot(tm) Software
RESULTS_SEARCH_8_PARAMETERS_PROGROUP_alternativedispositionmaximumfoldprobabilitydrop	100
RESULTS_SEARCH_8_PARAMETERS_PROGROUP_alternativedispositionmaximumfoldscoredrop	1900-01-02
RESULTS_SEARCH_8_PARAMETERS_PROGROUP_autodiscordantpeptidethreshold	07:12:00
RESULTS_SEARCH_8_PARAMETERS_PROGROUP_bayesconfidencecalclulation	TRUE
RESULTS_SEARCH_8_PARAMETERS_PROGROUP_calibrateconfidence	TRUE
RESULTS_SEARCH_8_PARAMETERS_PROGROUP_compresspeptides	FALSE
RESULTS_SEARCH_8_PARAMETERS_PROGROUP_confidencepercentthresholdforexcludingothersfromquant	1900-01-15
RESULTS_SEARCH_8_PARAMETERS_PROGROUP_confidencepercentthresholdforincludingselfinquant	15
RESULTS_SEARCH_8_PARAMETERS_PROGROUP_donotstoremspeaklists	FALSE
RESULTS_SEARCH_8_PARAMETERS_PROGROUP_fasta	C:\AB SCIEX\ProteinPilot Data\SearchDatabases\2019_UP_Mouse_Con.fasta
RESULTS_SEARCH_8_PARAMETERS_PROGROUP_featuregroupminpepconf	0.66
RESULTS_SEARCH_8_PARAMETERS_PROGROUP_featuregroupminups	0.47
RESULTS_SEARCH_8_PARAMETERS_PROGROUP_focusingintersection	4
RESULTS_SEARCH_8_PARAMETERS_PROGROUP_focusingminimummatchconfidence	0.1
RESULTS_SEARCH_8_PARAMETERS_PROGROUP_focusingminunusedprotscore	0.1
RESULTS_SEARCH_8_PARAMETERS_PROGROUP_focusingsubsetcutoff	6
RESULTS_SEARCH_8_PARAMETERS_PROGROUP_intersection	1.3
RESULTS_SEARCH_8_PARAMETERS_PROGROUP_minimummatchconfidencecutoff	0.001
RESULTS_SEARCH_8_PARAMETERS_PROGROUP_minunusedprotscore	0.0458
RESULTS_SEARCH_8_PARAMETERS_PROGROUP_subsetcutoff	2
RESULTS_SEARCH_8_PARAMETERS_PROGROUP_uniprotservicehttpssupported	TRUE
RESULTS_SEARCH_8_PARAMETERS_PROGROUP_unusedprotscorethresholdforexcludingothersfromquant	1.3
RESULTS_SEARCH_8_PARAMETERS_PEAKLIST_count	3645
RESULTS_SEARCH_8_PARAMETERS_PEAKLIST_filenumber	2
RESULTS_SEARCH_8_PARAMETERS_PEAKLIST_original_count	3645
RESULTS_SEARCH_8_PARAMETERS_PEAKLIST_originalfilename	C:\Data\Flores_Mirales\06202019\mus2\06172019_AFlor_Cath_2_A2.mgf
RESULTS_SEARCH_8_PARAMETERS_PEAKLIST_partnumber	8
RESULTS_SEARCH_8_PARAMETERS_QUANT_TYPE_background_correction	FALSE
RESULTS_SEARCH_8_PARAMETERS_QUANT_TYPE_bias_correction	TRUE
RESULTS_SEARCH_8_PARAMETERS_QUANT_TYPE_keep_extreme_peptides_over_fraction	0
RESULTS_SEARCH_8_PARAMETERS_QUANT_TYPE_low_confidence_check	TRUE
RESULTS_SEARCH_8_PARAMETERS_QUANT_TYPE_low_intensity_check	TRUE
RESULTS_SEARCH_8_PARAMETERS_QUANT_TYPE_median_statistic	TRUE
RESULTS_SEARCH_8_PARAMETERS_QUANT_TYPE_mod_check	TRUE
RESULTS_SEARCH_8_PARAMETERS_QUANT_TYPE_quant_threshold	-1
RESULTS_SEARCH_8_PARAMETERS_QUANT_TYPE_quant_threshold_sn	9
RESULTS_SEARCH_8_PARAMETERS_QUANT_TYPE_separate_searches	FALSE
RESULTS_SEARCH_8_PARAMETERS_QUANT_TYPE_shared_msms_check	TRUE
RESULTS_SEARCH_8_PARAMETERS_PARAGON_METHOD_SETTINGS_UI_SAMPLE_TYPE	Identification
RESULTS_SEARCH_8_PARAMETERS_PARAGON_METHOD_SETTINGS_UI_CYS_ALKYLATION	Iodoacetamide
RESULTS_SEARCH_8_PARAMETERS_PARAGON_METHOD_SETTINGS_UI_DIGESTION	Trypsin
RESULTS_SEARCH_8_PARAMETERS_PARAGON_METHOD_SETTINGS_UI_INSTRUMENT	Orbi MS (1-3ppm), Orbi MS/MS
RESULTS_SEARCH_8_PARAMETERS_PARAGON_METHOD_SETTINGS_UI_SEARCH_EFFORT	Rapid
RESULTS_SEARCH_8_PARAMETERS_PARAGON_METHOD_SETTINGS_UI_USER_NAME	ESC308585\MSPF
RESULTS_SEARCH_8_PARAMETERS_PARAGON_METHOD_SETTINGS_UI_MACHINE_NAME	ESC308585
RESULTS_SEARCH_8_PARAMETERS_PARAGON_METHOD_SETTINGS_UI_SEARCH_ID	6.36966e+17
RESULTS_SEARCH_8_PARAMETERS_PARAGON_METHOD_SETTINGS_UI_START_TIME	2019-06-19 14:49:40
RESULTS_SEARCH_8_PARAMETERS_PARAGON_METHOD_SETTINGS_UI_MIN_UNUSED_PROTSCORE	0.0458
RESULTS_SEARCH_8_PARAMETERS_PARAGON_METHOD_SETTINGS_UI_PSPEP	TRUE
RESULTS_SEARCH_9_time_cpu	68546
RESULTS_SEARCH_9_time_duration	68679
RESULTS_SEARCH_9_version	5.0.2.5174
RESULTS_SEARCH_9_xml:id	SEARCH:1:636965525803682795_8
RESULTS_SEARCH_9_PARAMETERS_chemical_data_edited	FALSE
RESULTS_SEARCH_9_PARAMETERS_do_multiprecursor_search	TRUE
RESULTS_SEARCH_9_PARAMETERS_do_reverse_search	TRUE
RESULTS_SEARCH_9_PARAMETERS_max_quant_labels	35
RESULTS_SEARCH_9_PARAMETERS_maxresults	15
RESULTS_SEARCH_9_PARAMETERS_separate_searches	FALSE
RESULTS_SEARCH_9_PARAMETERS_MSTOLERANCE_type	dalton
RESULTS_SEARCH_9_PARAMETERS_MSTOLERANCE_value	0.05
RESULTS_SEARCH_9_PARAMETERS_MSMSTOLERANCE_type	dalton
RESULTS_SEARCH_9_PARAMETERS_MSMSTOLERANCE_value	0.1
RESULTS_SEARCH_9_PARAMETERS_MS_STANDARD_DEVIATION_type	dalton
RESULTS_SEARCH_9_PARAMETERS_MS_STANDARD_DEVIATION_value	0.0025
RESULTS_SEARCH_9_PARAMETERS_MSMS_STANDARD_DEVIATION_type	dalton
RESULTS_SEARCH_9_PARAMETERS_MSMS_STANDARD_DEVIATION_value	0.004
RESULTS_SEARCH_9_PARAMETERS_FASTA_filename	C:\AB SCIEX\ProteinPilot Data\SearchDatabases\2019_UP_Mouse_Con.fasta
RESULTS_SEARCH_9_PARAMETERS_AUTO_CALIBRATION_ms	TRUE
RESULTS_SEARCH_9_PARAMETERS_AUTO_CALIBRATION_msexport	FALSE
RESULTS_SEARCH_9_PARAMETERS_AUTO_CALIBRATION_msms	TRUE
RESULTS_SEARCH_9_PARAMETERS_AUTO_CALIBRATION_msmstolsdratio	3
RESULTS_SEARCH_9_PARAMETERS_AUTO_CALIBRATION_mstolsdratio	11
RESULTS_SEARCH_9_PARAMETERS_AUTO_CALIBRATION_squareroot	FALSE
RESULTS_SEARCH_9_PARAMETERS_AUTO_CALIBRATION_type	dalton
RESULTS_SEARCH_9_PARAMETERS_AUTO_CALIBRATION_MCP_d_s_s_f	0.0666667
RESULTS_SEARCH_9_PARAMETERS_AUTO_CALIBRATION_MCP_d_s_w_f	3
RESULTS_SEARCH_9_PARAMETERS_AUTO_CALIBRATION_MCP_m_f_r_mbc	200
RESULTS_SEARCH_9_PARAMETERS_AUTO_CALIBRATION_MCP_m_m_c	10
RESULTS_SEARCH_9_PARAMETERS_AUTO_CALIBRATION_MCP_m_m_f_s	0.25
RESULTS_SEARCH_9_PARAMETERS_AUTO_CALIBRATION_MCP_m_m_p_f	0.33
RESULTS_SEARCH_9_PARAMETERS_AUTO_CALIBRATION_MCP_m_m_p_rms_f	1
RESULTS_SEARCH_9_PARAMETERS_AUTO_CALIBRATION_MCP_m_p_t_f	1
RESULTS_SEARCH_9_PARAMETERS_AUTO_CALIBRATION_MCP_m_r_h_n_b	15
RESULTS_SEARCH_9_PARAMETERS_AUTO_CALIBRATION_MCP_m_z_n_s	99
RESULTS_SEARCH_9_PARAMETERS_AUTO_CALIBRATION_MCP_m_z_s_mn_f_r	0.0666667
RESULTS_SEARCH_9_PARAMETERS_AUTO_CALIBRATION_MCP_m_z_s_mx_f_r	0.1
RESULTS_SEARCH_9_PARAMETERS_MS_AUTO_CALIBRATION_OUT_avres	-6.62176e-13
RESULTS_SEARCH_9_PARAMETERS_MS_AUTO_CALIBRATION_OUT_c0	0.000840376
RESULTS_SEARCH_9_PARAMETERS_MS_AUTO_CALIBRATION_OUT_c1minus1	-1.45605e-05
RESULTS_SEARCH_9_PARAMETERS_MS_AUTO_CALIBRATION_OUT_c2	0
RESULTS_SEARCH_9_PARAMETERS_MS_AUTO_CALIBRATION_OUT_file	3
RESULTS_SEARCH_9_PARAMETERS_MS_AUTO_CALIBRATION_OUT_partnumber	9
RESULTS_SEARCH_9_PARAMETERS_MS_AUTO_CALIBRATION_OUT_polyorder	1
RESULTS_SEARCH_9_PARAMETERS_MS_AUTO_CALIBRATION_OUT_sample	1900-01-01
RESULTS_SEARCH_9_PARAMETERS_MS_AUTO_CALIBRATION_OUT_squareroot	FALSE
RESULTS_SEARCH_9_PARAMETERS_MSMS_AUTO_CALIBRATION_OUT_avres	3.97405e-11
RESULTS_SEARCH_9_PARAMETERS_MSMS_AUTO_CALIBRATION_OUT_c0	-0.00121279
RESULTS_SEARCH_9_PARAMETERS_MSMS_AUTO_CALIBRATION_OUT_c1minus1	-8.00109e-06
RESULTS_SEARCH_9_PARAMETERS_MSMS_AUTO_CALIBRATION_OUT_c2	0
RESULTS_SEARCH_9_PARAMETERS_MSMS_AUTO_CALIBRATION_OUT_file	3
RESULTS_SEARCH_9_PARAMETERS_MSMS_AUTO_CALIBRATION_OUT_partnumber	9
RESULTS_SEARCH_9_PARAMETERS_MSMS_AUTO_CALIBRATION_OUT_polyorder	1
RESULTS_SEARCH_9_PARAMETERS_MSMS_AUTO_CALIBRATION_OUT_sample	1
RESULTS_SEARCH_9_PARAMETERS_MSMS_AUTO_CALIBRATION_OUT_squareroot	FALSE
RESULTS_SEARCH_9_PARAMETERS_MAX_PRECURSORS_FRAGLET	5
RESULTS_SEARCH_9_PARAMETERS_MAX_PRECURSORS_TAGLET	1
RESULTS_SEARCH_9_PARAMETERS_PRECURSORS_DR_FRAGLET	10
RESULTS_SEARCH_9_PARAMETERS_PRECURSORS_DR_TAGLET	3
RESULTS_SEARCH_9_PARAMETERS_DEFAULT_CHARGE_STATE_1_charge	1
RESULTS_SEARCH_9_PARAMETERS_DEFAULT_CHARGE_STATE_1_probability	1
RESULTS_SEARCH_9_PARAMETERS_DEFAULT_CHARGE_STATE_2_charge	2
RESULTS_SEARCH_9_PARAMETERS_DEFAULT_CHARGE_STATE_2_probability	1
RESULTS_SEARCH_9_PARAMETERS_DEFAULT_CHARGE_STATE_3_charge	3
RESULTS_SEARCH_9_PARAMETERS_DEFAULT_CHARGE_STATE_3_probability	1
RESULTS_SEARCH_9_PARAMETERS_VERSION	5.0.2.0, 5346
RESULTS_SEARCH_9_PARAMETERS_PARAGON_VERSION	5.0.2.0, 5174
RESULTS_SEARCH_9_PARAMETERS_APPLICATION	ProteinPilot(tm) Software
RESULTS_SEARCH_9_PARAMETERS_PROGROUP_alternativedispositionmaximumfoldprobabilitydrop	100
RESULTS_SEARCH_9_PARAMETERS_PROGROUP_alternativedispositionmaximumfoldscoredrop	2
RESULTS_SEARCH_9_PARAMETERS_PROGROUP_autodiscordantpeptidethreshold	0.3
RESULTS_SEARCH_9_PARAMETERS_PROGROUP_bayesconfidencecalclulation	TRUE
RESULTS_SEARCH_9_PARAMETERS_PROGROUP_calibrateconfidence	TRUE
RESULTS_SEARCH_9_PARAMETERS_PROGROUP_compresspeptides	FALSE
RESULTS_SEARCH_9_PARAMETERS_PROGROUP_confidencepercentthresholdforexcludingothersfromquant	15
RESULTS_SEARCH_9_PARAMETERS_PROGROUP_confidencepercentthresholdforincludingselfinquant	15
RESULTS_SEARCH_9_PARAMETERS_PROGROUP_donotstoremspeaklists	FALSE
RESULTS_SEARCH_9_PARAMETERS_PROGROUP_fasta	C:\AB SCIEX\ProteinPilot Data\SearchDatabases\2019_UP_Mouse_Con.fasta
RESULTS_SEARCH_9_PARAMETERS_PROGROUP_featuregroupminpepconf	0.66
RESULTS_SEARCH_9_PARAMETERS_PROGROUP_featuregroupminups	0.47
RESULTS_SEARCH_9_PARAMETERS_PROGROUP_focusingintersection	4
RESULTS_SEARCH_9_PARAMETERS_PROGROUP_focusingminimummatchconfidence	0.1
RESULTS_SEARCH_9_PARAMETERS_PROGROUP_focusingminunusedprotscore	0.1
RESULTS_SEARCH_9_PARAMETERS_PROGROUP_focusingsubsetcutoff	6
RESULTS_SEARCH_9_PARAMETERS_PROGROUP_intersection	1.3
RESULTS_SEARCH_9_PARAMETERS_PROGROUP_minimummatchconfidencecutoff	0.001
RESULTS_SEARCH_9_PARAMETERS_PROGROUP_minunusedprotscore	0.0458
RESULTS_SEARCH_9_PARAMETERS_PROGROUP_subsetcutoff	2
RESULTS_SEARCH_9_PARAMETERS_PROGROUP_uniprotservicehttpssupported	TRUE
RESULTS_SEARCH_9_PARAMETERS_PROGROUP_unusedprotscorethresholdforexcludingothersfromquant	1.3
RESULTS_SEARCH_9_PARAMETERS_PEAKLIST_count	1909-09-07
RESULTS_SEARCH_9_PARAMETERS_PEAKLIST_filenumber	3
RESULTS_SEARCH_9_PARAMETERS_PEAKLIST_original_count	3538
RESULTS_SEARCH_9_PARAMETERS_PEAKLIST_originalfilename	C:\Data\Flores_Mirales\06202019\mus2\06172019_AFlor_Cath_2_A3.mgf
RESULTS_SEARCH_9_PARAMETERS_PEAKLIST_partnumber	9
RESULTS_SEARCH_9_PARAMETERS_QUANT_TYPE_background_correction	FALSE
RESULTS_SEARCH_9_PARAMETERS_QUANT_TYPE_bias_correction	TRUE
RESULTS_SEARCH_9_PARAMETERS_QUANT_TYPE_keep_extreme_peptides_over_fraction	0
RESULTS_SEARCH_9_PARAMETERS_QUANT_TYPE_low_confidence_check	TRUE
RESULTS_SEARCH_9_PARAMETERS_QUANT_TYPE_low_intensity_check	TRUE
RESULTS_SEARCH_9_PARAMETERS_QUANT_TYPE_median_statistic	TRUE
RESULTS_SEARCH_9_PARAMETERS_QUANT_TYPE_mod_check	TRUE
RESULTS_SEARCH_9_PARAMETERS_QUANT_TYPE_quant_threshold	-1
RESULTS_SEARCH_9_PARAMETERS_QUANT_TYPE_quant_threshold_sn	9
RESULTS_SEARCH_9_PARAMETERS_QUANT_TYPE_separate_searches	FALSE
RESULTS_SEARCH_9_PARAMETERS_QUANT_TYPE_shared_msms_check	TRUE
RESULTS_SEARCH_9_PARAMETERS_PARAGON_METHOD_SETTINGS_UI_SAMPLE_TYPE	Identification
RESULTS_SEARCH_9_PARAMETERS_PARAGON_METHOD_SETTINGS_UI_CYS_ALKYLATION	Iodoacetamide
RESULTS_SEARCH_9_PARAMETERS_PARAGON_METHOD_SETTINGS_UI_DIGESTION	Trypsin
RESULTS_SEARCH_9_PARAMETERS_PARAGON_METHOD_SETTINGS_UI_INSTRUMENT	Orbi MS (1-3ppm), Orbi MS/MS
RESULTS_SEARCH_9_PARAMETERS_PARAGON_METHOD_SETTINGS_UI_SEARCH_EFFORT	Rapid
RESULTS_SEARCH_9_PARAMETERS_PARAGON_METHOD_SETTINGS_UI_USER_NAME	ESC308585\MSPF
RESULTS_SEARCH_9_PARAMETERS_PARAGON_METHOD_SETTINGS_UI_MACHINE_NAME	ESC308585
RESULTS_SEARCH_9_PARAMETERS_PARAGON_METHOD_SETTINGS_UI_SEARCH_ID	#VALUE!
RESULTS_SEARCH_9_PARAMETERS_PARAGON_METHOD_SETTINGS_UI_START_TIME	2019-06-19 14:49:40
RESULTS_SEARCH_9_PARAMETERS_PARAGON_METHOD_SETTINGS_UI_MIN_UNUSED_PROTSCORE	0.0458
RESULTS_SEARCH_9_PARAMETERS_PARAGON_METHOD_SETTINGS_UI_PSPEP	TRUE
RESULTS_SEARCH_10_time_cpu	68328
RESULTS_SEARCH_10_time_duration	68413
RESULTS_SEARCH_10_version	5.0.2.5174
RESULTS_SEARCH_10_xml:id	SEARCH:1:636965525803682795_9
RESULTS_SEARCH_10_PARAMETERS_chemical_data_edited	FALSE
RESULTS_SEARCH_10_PARAMETERS_do_multiprecursor_search	TRUE
RESULTS_SEARCH_10_PARAMETERS_do_reverse_search	TRUE
RESULTS_SEARCH_10_PARAMETERS_max_quant_labels	35
RESULTS_SEARCH_10_PARAMETERS_maxresults	15
RESULTS_SEARCH_10_PARAMETERS_separate_searches	FALSE
RESULTS_SEARCH_10_PARAMETERS_MSTOLERANCE_type	dalton
RESULTS_SEARCH_10_PARAMETERS_MSTOLERANCE_value	0.05
RESULTS_SEARCH_10_PARAMETERS_MSMSTOLERANCE_type	dalton
RESULTS_SEARCH_10_PARAMETERS_MSMSTOLERANCE_value	0.1
RESULTS_SEARCH_10_PARAMETERS_MS_STANDARD_DEVIATION_type	dalton
RESULTS_SEARCH_10_PARAMETERS_MS_STANDARD_DEVIATION_value	0.0025
RESULTS_SEARCH_10_PARAMETERS_MSMS_STANDARD_DEVIATION_type	dalton
RESULTS_SEARCH_10_PARAMETERS_MSMS_STANDARD_DEVIATION_value	0.004
RESULTS_SEARCH_10_PARAMETERS_FASTA_filename	C:\AB SCIEX\ProteinPilot Data\SearchDatabases\2019_UP_Mouse_Con.fasta
RESULTS_SEARCH_10_PARAMETERS_AUTO_CALIBRATION_ms	TRUE
RESULTS_SEARCH_10_PARAMETERS_AUTO_CALIBRATION_msexport	FALSE
RESULTS_SEARCH_10_PARAMETERS_AUTO_CALIBRATION_msms	TRUE
RESULTS_SEARCH_10_PARAMETERS_AUTO_CALIBRATION_msmstolsdratio	3
RESULTS_SEARCH_10_PARAMETERS_AUTO_CALIBRATION_mstolsdratio	11
RESULTS_SEARCH_10_PARAMETERS_AUTO_CALIBRATION_squareroot	FALSE
RESULTS_SEARCH_10_PARAMETERS_AUTO_CALIBRATION_type	dalton
RESULTS_SEARCH_10_PARAMETERS_AUTO_CALIBRATION_MCP_d_s_s_f	0.0666667
RESULTS_SEARCH_10_PARAMETERS_AUTO_CALIBRATION_MCP_d_s_w_f	3
RESULTS_SEARCH_10_PARAMETERS_AUTO_CALIBRATION_MCP_m_f_r_mbc	200
RESULTS_SEARCH_10_PARAMETERS_AUTO_CALIBRATION_MCP_m_m_c	10
RESULTS_SEARCH_10_PARAMETERS_AUTO_CALIBRATION_MCP_m_m_f_s	0.25
RESULTS_SEARCH_10_PARAMETERS_AUTO_CALIBRATION_MCP_m_m_p_f	0.33
RESULTS_SEARCH_10_PARAMETERS_AUTO_CALIBRATION_MCP_m_m_p_rms_f	1
RESULTS_SEARCH_10_PARAMETERS_AUTO_CALIBRATION_MCP_m_p_t_f	1
RESULTS_SEARCH_10_PARAMETERS_AUTO_CALIBRATION_MCP_m_r_h_n_b	15
RESULTS_SEARCH_10_PARAMETERS_AUTO_CALIBRATION_MCP_m_z_n_s	99
RESULTS_SEARCH_10_PARAMETERS_AUTO_CALIBRATION_MCP_m_z_s_mn_f_r	0.0666667
RESULTS_SEARCH_10_PARAMETERS_AUTO_CALIBRATION_MCP_m_z_s_mx_f_r	0.1
RESULTS_SEARCH_10_PARAMETERS_MS_AUTO_CALIBRATION_OUT_avres	-4.91885e-13
RESULTS_SEARCH_10_PARAMETERS_MS_AUTO_CALIBRATION_OUT_c0	-0.00169036
RESULTS_SEARCH_10_PARAMETERS_MS_AUTO_CALIBRATION_OUT_c1minus1	-1.19176e-05
RESULTS_SEARCH_10_PARAMETERS_MS_AUTO_CALIBRATION_OUT_c2	0
RESULTS_SEARCH_10_PARAMETERS_MS_AUTO_CALIBRATION_OUT_file	3
RESULTS_SEARCH_10_PARAMETERS_MS_AUTO_CALIBRATION_OUT_partnumber	10
RESULTS_SEARCH_10_PARAMETERS_MS_AUTO_CALIBRATION_OUT_polyorder	1
RESULTS_SEARCH_10_PARAMETERS_MS_AUTO_CALIBRATION_OUT_sample	1
RESULTS_SEARCH_10_PARAMETERS_MS_AUTO_CALIBRATION_OUT_squareroot	FALSE
RESULTS_SEARCH_10_PARAMETERS_MSMS_AUTO_CALIBRATION_OUT_avres	1.36856e-10
RESULTS_SEARCH_10_PARAMETERS_MSMS_AUTO_CALIBRATION_OUT_c0	-0.0021641
RESULTS_SEARCH_10_PARAMETERS_MSMS_AUTO_CALIBRATION_OUT_c1minus1	-6.19928e-06
RESULTS_SEARCH_10_PARAMETERS_MSMS_AUTO_CALIBRATION_OUT_c2	0
RESULTS_SEARCH_10_PARAMETERS_MSMS_AUTO_CALIBRATION_OUT_file	3
RESULTS_SEARCH_10_PARAMETERS_MSMS_AUTO_CALIBRATION_OUT_partnumber	10
RESULTS_SEARCH_10_PARAMETERS_MSMS_AUTO_CALIBRATION_OUT_polyorder	1
RESULTS_SEARCH_10_PARAMETERS_MSMS_AUTO_CALIBRATION_OUT_sample	1
RESULTS_SEARCH_10_PARAMETERS_MSMS_AUTO_CALIBRATION_OUT_squareroot	FALSE
RESULTS_SEARCH_10_PARAMETERS_MAX_PRECURSORS_FRAGLET	5
RESULTS_SEARCH_10_PARAMETERS_MAX_PRECURSORS_TAGLET	1
RESULTS_SEARCH_10_PARAMETERS_PRECURSORS_DR_FRAGLET	10
RESULTS_SEARCH_10_PARAMETERS_PRECURSORS_DR_TAGLET	3
RESULTS_SEARCH_10_PARAMETERS_DEFAULT_CHARGE_STATE_1_charge	1
RESULTS_SEARCH_10_PARAMETERS_DEFAULT_CHARGE_STATE_1_probability	1
RESULTS_SEARCH_10_PARAMETERS_DEFAULT_CHARGE_STATE_2_charge	2
RESULTS_SEARCH_10_PARAMETERS_DEFAULT_CHARGE_STATE_2_probability	1
RESULTS_SEARCH_10_PARAMETERS_DEFAULT_CHARGE_STATE_3_charge	3
RESULTS_SEARCH_10_PARAMETERS_DEFAULT_CHARGE_STATE_3_probability	1
RESULTS_SEARCH_10_PARAMETERS_VERSION	5.0.2.0, 5346
RESULTS_SEARCH_10_PARAMETERS_PARAGON_VERSION	5.0.2.0, 5174
RESULTS_SEARCH_10_PARAMETERS_APPLICATION	ProteinPilot(tm) Software
RESULTS_SEARCH_10_PARAMETERS_PROGROUP_alternativedispositionmaximumfoldprobabilitydrop	100
RESULTS_SEARCH_10_PARAMETERS_PROGROUP_alternativedispositionmaximumfoldscoredrop	2
RESULTS_SEARCH_10_PARAMETERS_PROGROUP_autodiscordantpeptidethreshold	0.3
RESULTS_SEARCH_10_PARAMETERS_PROGROUP_bayesconfidencecalclulation	TRUE
RESULTS_SEARCH_10_PARAMETERS_PROGROUP_calibrateconfidence	TRUE
RESULTS_SEARCH_10_PARAMETERS_PROGROUP_compresspeptides	FALSE
RESULTS_SEARCH_10_PARAMETERS_PROGROUP_confidencepercentthresholdforexcludingothersfromquant	15
RESULTS_SEARCH_10_PARAMETERS_PROGROUP_confidencepercentthresholdforincludingselfinquant	1900-01-15
RESULTS_SEARCH_10_PARAMETERS_PROGROUP_donotstoremspeaklists	FALSE
RESULTS_SEARCH_10_PARAMETERS_PROGROUP_fasta	C:\AB SCIEX\ProteinPilot Data\SearchDatabases\2019_UP_Mouse_Con.fasta
RESULTS_SEARCH_10_PARAMETERS_PROGROUP_featuregroupminpepconf	0.66
RESULTS_SEARCH_10_PARAMETERS_PROGROUP_featuregroupminups	0.47
RESULTS_SEARCH_10_PARAMETERS_PROGROUP_focusingintersection	4
RESULTS_SEARCH_10_PARAMETERS_PROGROUP_focusingminimummatchconfidence	0.1
RESULTS_SEARCH_10_PARAMETERS_PROGROUP_focusingminunusedprotscore	0.1
RESULTS_SEARCH_10_PARAMETERS_PROGROUP_focusingsubsetcutoff	6
RESULTS_SEARCH_10_PARAMETERS_PROGROUP_intersection	1.3
RESULTS_SEARCH_10_PARAMETERS_PROGROUP_minimummatchconfidencecutoff	0.001
RESULTS_SEARCH_10_PARAMETERS_PROGROUP_minunusedprotscore	0.0458
RESULTS_SEARCH_10_PARAMETERS_PROGROUP_subsetcutoff	2
RESULTS_SEARCH_10_PARAMETERS_PROGROUP_uniprotservicehttpssupported	TRUE
RESULTS_SEARCH_10_PARAMETERS_PROGROUP_unusedprotscorethresholdforexcludingothersfromquant	1.3
RESULTS_SEARCH_10_PARAMETERS_PEAKLIST_count	1909-10-02
RESULTS_SEARCH_10_PARAMETERS_PEAKLIST_filenumber	3
RESULTS_SEARCH_10_PARAMETERS_PEAKLIST_original_count	3563
RESULTS_SEARCH_10_PARAMETERS_PEAKLIST_originalfilename	C:\Data\Flores_Mirales\06202019\mus2\06172019_AFlor_Cath_2_A3.mgf
RESULTS_SEARCH_10_PARAMETERS_PEAKLIST_partnumber	10
RESULTS_SEARCH_10_PARAMETERS_QUANT_TYPE_background_correction	FALSE
RESULTS_SEARCH_10_PARAMETERS_QUANT_TYPE_bias_correction	TRUE
RESULTS_SEARCH_10_PARAMETERS_QUANT_TYPE_keep_extreme_peptides_over_fraction	0
RESULTS_SEARCH_10_PARAMETERS_QUANT_TYPE_low_confidence_check	TRUE
RESULTS_SEARCH_10_PARAMETERS_QUANT_TYPE_low_intensity_check	TRUE
RESULTS_SEARCH_10_PARAMETERS_QUANT_TYPE_median_statistic	TRUE
RESULTS_SEARCH_10_PARAMETERS_QUANT_TYPE_mod_check	TRUE
RESULTS_SEARCH_10_PARAMETERS_QUANT_TYPE_quant_threshold	-1
RESULTS_SEARCH_10_PARAMETERS_QUANT_TYPE_quant_threshold_sn	9
RESULTS_SEARCH_10_PARAMETERS_QUANT_TYPE_separate_searches	FALSE
RESULTS_SEARCH_10_PARAMETERS_QUANT_TYPE_shared_msms_check	TRUE
RESULTS_SEARCH_10_PARAMETERS_PARAGON_METHOD_SETTINGS_UI_SAMPLE_TYPE	Identification
RESULTS_SEARCH_10_PARAMETERS_PARAGON_METHOD_SETTINGS_UI_CYS_ALKYLATION	Iodoacetamide
RESULTS_SEARCH_10_PARAMETERS_PARAGON_METHOD_SETTINGS_UI_DIGESTION	Trypsin
RESULTS_SEARCH_10_PARAMETERS_PARAGON_METHOD_SETTINGS_UI_INSTRUMENT	Orbi MS (1-3ppm), Orbi MS/MS
RESULTS_SEARCH_10_PARAMETERS_PARAGON_METHOD_SETTINGS_UI_SEARCH_EFFORT	Rapid
RESULTS_SEARCH_10_PARAMETERS_PARAGON_METHOD_SETTINGS_UI_USER_NAME	ESC308585\MSPF
RESULTS_SEARCH_10_PARAMETERS_PARAGON_METHOD_SETTINGS_UI_MACHINE_NAME	ESC308585
RESULTS_SEARCH_10_PARAMETERS_PARAGON_METHOD_SETTINGS_UI_SEARCH_ID	6.36966e+17
RESULTS_SEARCH_10_PARAMETERS_PARAGON_METHOD_SETTINGS_UI_START_TIME	2019-06-19 14:49:40
RESULTS_SEARCH_10_PARAMETERS_PARAGON_METHOD_SETTINGS_UI_MIN_UNUSED_PROTSCORE	0.0458
RESULTS_SEARCH_10_PARAMETERS_PARAGON_METHOD_SETTINGS_UI_PSPEP	TRUE
RESULTS_SEARCH_11_time_cpu	57265
RESULTS_SEARCH_11_time_duration	57405
RESULTS_SEARCH_11_version	5.0.2.5174
RESULTS_SEARCH_11_xml:id	SEARCH:1:636965525803682795_10
RESULTS_SEARCH_11_PARAMETERS_chemical_data_edited	FALSE
RESULTS_SEARCH_11_PARAMETERS_do_multiprecursor_search	TRUE
RESULTS_SEARCH_11_PARAMETERS_do_reverse_search	TRUE
RESULTS_SEARCH_11_PARAMETERS_max_quant_labels	35
RESULTS_SEARCH_11_PARAMETERS_maxresults	15
RESULTS_SEARCH_11_PARAMETERS_separate_searches	FALSE
RESULTS_SEARCH_11_PARAMETERS_MSTOLERANCE_type	dalton
RESULTS_SEARCH_11_PARAMETERS_MSTOLERANCE_value	0.05
RESULTS_SEARCH_11_PARAMETERS_MSMSTOLERANCE_type	dalton
RESULTS_SEARCH_11_PARAMETERS_MSMSTOLERANCE_value	0.1
RESULTS_SEARCH_11_PARAMETERS_MS_STANDARD_DEVIATION_type	dalton
RESULTS_SEARCH_11_PARAMETERS_MS_STANDARD_DEVIATION_value	0.0025
RESULTS_SEARCH_11_PARAMETERS_MSMS_STANDARD_DEVIATION_type	dalton
RESULTS_SEARCH_11_PARAMETERS_MSMS_STANDARD_DEVIATION_value	0.004
RESULTS_SEARCH_11_PARAMETERS_FASTA_filename	C:\AB SCIEX\ProteinPilot Data\SearchDatabases\2019_UP_Mouse_Con.fasta
RESULTS_SEARCH_11_PARAMETERS_AUTO_CALIBRATION_ms	TRUE
RESULTS_SEARCH_11_PARAMETERS_AUTO_CALIBRATION_msexport	FALSE
RESULTS_SEARCH_11_PARAMETERS_AUTO_CALIBRATION_msms	TRUE
RESULTS_SEARCH_11_PARAMETERS_AUTO_CALIBRATION_msmstolsdratio	3
RESULTS_SEARCH_11_PARAMETERS_AUTO_CALIBRATION_mstolsdratio	11
RESULTS_SEARCH_11_PARAMETERS_AUTO_CALIBRATION_squareroot	FALSE
RESULTS_SEARCH_11_PARAMETERS_AUTO_CALIBRATION_type	dalton
RESULTS_SEARCH_11_PARAMETERS_AUTO_CALIBRATION_MCP_d_s_s_f	0.0666667
RESULTS_SEARCH_11_PARAMETERS_AUTO_CALIBRATION_MCP_d_s_w_f	3
RESULTS_SEARCH_11_PARAMETERS_AUTO_CALIBRATION_MCP_m_f_r_mbc	200
RESULTS_SEARCH_11_PARAMETERS_AUTO_CALIBRATION_MCP_m_m_c	10
RESULTS_SEARCH_11_PARAMETERS_AUTO_CALIBRATION_MCP_m_m_f_s	0.25
RESULTS_SEARCH_11_PARAMETERS_AUTO_CALIBRATION_MCP_m_m_p_f	0.33
RESULTS_SEARCH_11_PARAMETERS_AUTO_CALIBRATION_MCP_m_m_p_rms_f	1
RESULTS_SEARCH_11_PARAMETERS_AUTO_CALIBRATION_MCP_m_p_t_f	1
RESULTS_SEARCH_11_PARAMETERS_AUTO_CALIBRATION_MCP_m_r_h_n_b	15
RESULTS_SEARCH_11_PARAMETERS_AUTO_CALIBRATION_MCP_m_z_n_s	99
RESULTS_SEARCH_11_PARAMETERS_AUTO_CALIBRATION_MCP_m_z_s_mn_f_r	0.0666667
RESULTS_SEARCH_11_PARAMETERS_AUTO_CALIBRATION_MCP_m_z_s_mx_f_r	0.1
RESULTS_SEARCH_11_PARAMETERS_MS_AUTO_CALIBRATION_OUT_avres	-4.97015e-13
RESULTS_SEARCH_11_PARAMETERS_MS_AUTO_CALIBRATION_OUT_c0	0.000717258
RESULTS_SEARCH_11_PARAMETERS_MS_AUTO_CALIBRATION_OUT_c1minus1	-1.47965e-05
RESULTS_SEARCH_11_PARAMETERS_MS_AUTO_CALIBRATION_OUT_c2	0
RESULTS_SEARCH_11_PARAMETERS_MS_AUTO_CALIBRATION_OUT_file	3
RESULTS_SEARCH_11_PARAMETERS_MS_AUTO_CALIBRATION_OUT_partnumber	11
RESULTS_SEARCH_11_PARAMETERS_MS_AUTO_CALIBRATION_OUT_polyorder	1
RESULTS_SEARCH_11_PARAMETERS_MS_AUTO_CALIBRATION_OUT_sample	1
RESULTS_SEARCH_11_PARAMETERS_MS_AUTO_CALIBRATION_OUT_squareroot	FALSE
RESULTS_SEARCH_11_PARAMETERS_MSMS_AUTO_CALIBRATION_OUT_avres	8.08495e-11
RESULTS_SEARCH_11_PARAMETERS_MSMS_AUTO_CALIBRATION_OUT_c0	-0.00283855
RESULTS_SEARCH_11_PARAMETERS_MSMS_AUTO_CALIBRATION_OUT_c1minus1	-4.2158e-06
RESULTS_SEARCH_11_PARAMETERS_MSMS_AUTO_CALIBRATION_OUT_c2	0
RESULTS_SEARCH_11_PARAMETERS_MSMS_AUTO_CALIBRATION_OUT_file	3
RESULTS_SEARCH_11_PARAMETERS_MSMS_AUTO_CALIBRATION_OUT_partnumber	11
RESULTS_SEARCH_11_PARAMETERS_MSMS_AUTO_CALIBRATION_OUT_polyorder	1
RESULTS_SEARCH_11_PARAMETERS_MSMS_AUTO_CALIBRATION_OUT_sample	1
RESULTS_SEARCH_11_PARAMETERS_MSMS_AUTO_CALIBRATION_OUT_squareroot	FALSE
RESULTS_SEARCH_11_PARAMETERS_MAX_PRECURSORS_FRAGLET	5
RESULTS_SEARCH_11_PARAMETERS_MAX_PRECURSORS_TAGLET	1
RESULTS_SEARCH_11_PARAMETERS_PRECURSORS_DR_FRAGLET	10
RESULTS_SEARCH_11_PARAMETERS_PRECURSORS_DR_TAGLET	3
RESULTS_SEARCH_11_PARAMETERS_DEFAULT_CHARGE_STATE_1_charge	1
RESULTS_SEARCH_11_PARAMETERS_DEFAULT_CHARGE_STATE_1_probability	1900-01-01
RESULTS_SEARCH_11_PARAMETERS_DEFAULT_CHARGE_STATE_2_charge	2
RESULTS_SEARCH_11_PARAMETERS_DEFAULT_CHARGE_STATE_2_probability	1
RESULTS_SEARCH_11_PARAMETERS_DEFAULT_CHARGE_STATE_3_charge	3
RESULTS_SEARCH_11_PARAMETERS_DEFAULT_CHARGE_STATE_3_probability	1
RESULTS_SEARCH_11_PARAMETERS_VERSION	5.0.2.0, 5346
RESULTS_SEARCH_11_PARAMETERS_PARAGON_VERSION	5.0.2.0, 5174
RESULTS_SEARCH_11_PARAMETERS_APPLICATION	ProteinPilot(tm) Software
RESULTS_SEARCH_11_PARAMETERS_PROGROUP_alternativedispositionmaximumfoldprobabilitydrop	100
RESULTS_SEARCH_11_PARAMETERS_PROGROUP_alternativedispositionmaximumfoldscoredrop	2
RESULTS_SEARCH_11_PARAMETERS_PROGROUP_autodiscordantpeptidethreshold	0.3
RESULTS_SEARCH_11_PARAMETERS_PROGROUP_bayesconfidencecalclulation	TRUE
RESULTS_SEARCH_11_PARAMETERS_PROGROUP_calibrateconfidence	TRUE
RESULTS_SEARCH_11_PARAMETERS_PROGROUP_compresspeptides	FALSE
RESULTS_SEARCH_11_PARAMETERS_PROGROUP_confidencepercentthresholdforexcludingothersfromquant	15
RESULTS_SEARCH_11_PARAMETERS_PROGROUP_confidencepercentthresholdforincludingselfinquant	15
RESULTS_SEARCH_11_PARAMETERS_PROGROUP_donotstoremspeaklists	FALSE
RESULTS_SEARCH_11_PARAMETERS_PROGROUP_fasta	C:\AB SCIEX\ProteinPilot Data\SearchDatabases\2019_UP_Mouse_Con.fasta
RESULTS_SEARCH_11_PARAMETERS_PROGROUP_featuregroupminpepconf	0.66
RESULTS_SEARCH_11_PARAMETERS_PROGROUP_featuregroupminups	0.47
RESULTS_SEARCH_11_PARAMETERS_PROGROUP_focusingintersection	4
RESULTS_SEARCH_11_PARAMETERS_PROGROUP_focusingminimummatchconfidence	0.1
RESULTS_SEARCH_11_PARAMETERS_PROGROUP_focusingminunusedprotscore	0.1
RESULTS_SEARCH_11_PARAMETERS_PROGROUP_focusingsubsetcutoff	6
RESULTS_SEARCH_11_PARAMETERS_PROGROUP_intersection	1900-01-01 07:12:00
RESULTS_SEARCH_11_PARAMETERS_PROGROUP_minimummatchconfidencecutoff	0.001
RESULTS_SEARCH_11_PARAMETERS_PROGROUP_minunusedprotscore	0.0458
RESULTS_SEARCH_11_PARAMETERS_PROGROUP_subsetcutoff	2
RESULTS_SEARCH_11_PARAMETERS_PROGROUP_uniprotservicehttpssupported	TRUE
RESULTS_SEARCH_11_PARAMETERS_PROGROUP_unusedprotscorethresholdforexcludingothersfromquant	1.3
RESULTS_SEARCH_11_PARAMETERS_PEAKLIST_count	3579
RESULTS_SEARCH_11_PARAMETERS_PEAKLIST_filenumber	1900-01-03
RESULTS_SEARCH_11_PARAMETERS_PEAKLIST_original_count	1909-10-18
RESULTS_SEARCH_11_PARAMETERS_PEAKLIST_originalfilename	C:\Data\Flores_Mirales\06202019\mus2\06172019_AFlor_Cath_2_A3.mgf
RESULTS_SEARCH_11_PARAMETERS_PEAKLIST_partnumber	11
RESULTS_SEARCH_11_PARAMETERS_QUANT_TYPE_background_correction	FALSE
RESULTS_SEARCH_11_PARAMETERS_QUANT_TYPE_bias_correction	TRUE
RESULTS_SEARCH_11_PARAMETERS_QUANT_TYPE_keep_extreme_peptides_over_fraction	0
RESULTS_SEARCH_11_PARAMETERS_QUANT_TYPE_low_confidence_check	TRUE
RESULTS_SEARCH_11_PARAMETERS_QUANT_TYPE_low_intensity_check	TRUE
RESULTS_SEARCH_11_PARAMETERS_QUANT_TYPE_median_statistic	TRUE
RESULTS_SEARCH_11_PARAMETERS_QUANT_TYPE_mod_check	TRUE
RESULTS_SEARCH_11_PARAMETERS_QUANT_TYPE_quant_threshold	-1
RESULTS_SEARCH_11_PARAMETERS_QUANT_TYPE_quant_threshold_sn	9
RESULTS_SEARCH_11_PARAMETERS_QUANT_TYPE_separate_searches	FALSE
RESULTS_SEARCH_11_PARAMETERS_QUANT_TYPE_shared_msms_check	TRUE
RESULTS_SEARCH_11_PARAMETERS_PARAGON_METHOD_SETTINGS_UI_SAMPLE_TYPE	Identification
RESULTS_SEARCH_11_PARAMETERS_PARAGON_METHOD_SETTINGS_UI_CYS_ALKYLATION	Iodoacetamide
RESULTS_SEARCH_11_PARAMETERS_PARAGON_METHOD_SETTINGS_UI_DIGESTION	Trypsin
RESULTS_SEARCH_11_PARAMETERS_PARAGON_METHOD_SETTINGS_UI_INSTRUMENT	Orbi MS (1-3ppm), Orbi MS/MS
RESULTS_SEARCH_11_PARAMETERS_PARAGON_METHOD_SETTINGS_UI_SEARCH_EFFORT	Rapid
RESULTS_SEARCH_11_PARAMETERS_PARAGON_METHOD_SETTINGS_UI_USER_NAME	ESC308585\MSPF
RESULTS_SEARCH_11_PARAMETERS_PARAGON_METHOD_SETTINGS_UI_MACHINE_NAME	ESC308585
RESULTS_SEARCH_11_PARAMETERS_PARAGON_METHOD_SETTINGS_UI_SEARCH_ID	6.36966e+17
RESULTS_SEARCH_11_PARAMETERS_PARAGON_METHOD_SETTINGS_UI_START_TIME	2019-06-19 14:49:40
RESULTS_SEARCH_11_PARAMETERS_PARAGON_METHOD_SETTINGS_UI_MIN_UNUSED_PROTSCORE	0.0458
RESULTS_SEARCH_11_PARAMETERS_PARAGON_METHOD_SETTINGS_UI_PSPEP	TRUE
RESULTS_SEARCH_12_time_cpu	49375
RESULTS_SEARCH_12_time_duration	49518
RESULTS_SEARCH_12_version	5.0.2.5174
RESULTS_SEARCH_12_xml:id	SEARCH:1:636965525803682795_11
RESULTS_SEARCH_12_PARAMETERS_chemical_data_edited	FALSE
RESULTS_SEARCH_12_PARAMETERS_do_multiprecursor_search	TRUE
RESULTS_SEARCH_12_PARAMETERS_do_reverse_search	TRUE
RESULTS_SEARCH_12_PARAMETERS_max_quant_labels	35
RESULTS_SEARCH_12_PARAMETERS_maxresults	15
RESULTS_SEARCH_12_PARAMETERS_separate_searches	FALSE
RESULTS_SEARCH_12_PARAMETERS_MSTOLERANCE_type	dalton
RESULTS_SEARCH_12_PARAMETERS_MSTOLERANCE_value	0.05
RESULTS_SEARCH_12_PARAMETERS_MSMSTOLERANCE_type	dalton
RESULTS_SEARCH_12_PARAMETERS_MSMSTOLERANCE_value	0.1
RESULTS_SEARCH_12_PARAMETERS_MS_STANDARD_DEVIATION_type	dalton
RESULTS_SEARCH_12_PARAMETERS_MS_STANDARD_DEVIATION_value	0.0025
RESULTS_SEARCH_12_PARAMETERS_MSMS_STANDARD_DEVIATION_type	dalton
RESULTS_SEARCH_12_PARAMETERS_MSMS_STANDARD_DEVIATION_value	0.004
RESULTS_SEARCH_12_PARAMETERS_FASTA_filename	C:\AB SCIEX\ProteinPilot Data\SearchDatabases\2019_UP_Mouse_Con.fasta
RESULTS_SEARCH_12_PARAMETERS_AUTO_CALIBRATION_ms	TRUE
RESULTS_SEARCH_12_PARAMETERS_AUTO_CALIBRATION_msexport	FALSE
RESULTS_SEARCH_12_PARAMETERS_AUTO_CALIBRATION_msms	TRUE
RESULTS_SEARCH_12_PARAMETERS_AUTO_CALIBRATION_msmstolsdratio	3
RESULTS_SEARCH_12_PARAMETERS_AUTO_CALIBRATION_mstolsdratio	11
RESULTS_SEARCH_12_PARAMETERS_AUTO_CALIBRATION_squareroot	FALSE
RESULTS_SEARCH_12_PARAMETERS_AUTO_CALIBRATION_type	dalton
RESULTS_SEARCH_12_PARAMETERS_AUTO_CALIBRATION_MCP_d_s_s_f	0.0666667
RESULTS_SEARCH_12_PARAMETERS_AUTO_CALIBRATION_MCP_d_s_w_f	3
RESULTS_SEARCH_12_PARAMETERS_AUTO_CALIBRATION_MCP_m_f_r_mbc	200
RESULTS_SEARCH_12_PARAMETERS_AUTO_CALIBRATION_MCP_m_m_c	10
RESULTS_SEARCH_12_PARAMETERS_AUTO_CALIBRATION_MCP_m_m_f_s	0.25
RESULTS_SEARCH_12_PARAMETERS_AUTO_CALIBRATION_MCP_m_m_p_f	0.33
RESULTS_SEARCH_12_PARAMETERS_AUTO_CALIBRATION_MCP_m_m_p_rms_f	1
RESULTS_SEARCH_12_PARAMETERS_AUTO_CALIBRATION_MCP_m_p_t_f	1
RESULTS_SEARCH_12_PARAMETERS_AUTO_CALIBRATION_MCP_m_r_h_n_b	15
RESULTS_SEARCH_12_PARAMETERS_AUTO_CALIBRATION_MCP_m_z_n_s	99
RESULTS_SEARCH_12_PARAMETERS_AUTO_CALIBRATION_MCP_m_z_s_mn_f_r	0.0666667
RESULTS_SEARCH_12_PARAMETERS_AUTO_CALIBRATION_MCP_m_z_s_mx_f_r	0.1
RESULTS_SEARCH_12_PARAMETERS_MS_AUTO_CALIBRATION_OUT_avres	-3.11855e-12
RESULTS_SEARCH_12_PARAMETERS_MS_AUTO_CALIBRATION_OUT_c0	-6.38981e-05
RESULTS_SEARCH_12_PARAMETERS_MS_AUTO_CALIBRATION_OUT_c1minus1	-1.25357e-05
RESULTS_SEARCH_12_PARAMETERS_MS_AUTO_CALIBRATION_OUT_c2	0
RESULTS_SEARCH_12_PARAMETERS_MS_AUTO_CALIBRATION_OUT_file	3
RESULTS_SEARCH_12_PARAMETERS_MS_AUTO_CALIBRATION_OUT_partnumber	12
RESULTS_SEARCH_12_PARAMETERS_MS_AUTO_CALIBRATION_OUT_polyorder	1
RESULTS_SEARCH_12_PARAMETERS_MS_AUTO_CALIBRATION_OUT_sample	1
RESULTS_SEARCH_12_PARAMETERS_MS_AUTO_CALIBRATION_OUT_squareroot	FALSE
RESULTS_SEARCH_12_PARAMETERS_MSMS_AUTO_CALIBRATION_OUT_avres	1.22932e-09
RESULTS_SEARCH_12_PARAMETERS_MSMS_AUTO_CALIBRATION_OUT_c0	-0.00229087
RESULTS_SEARCH_12_PARAMETERS_MSMS_AUTO_CALIBRATION_OUT_c1minus1	-4.85949e-06
RESULTS_SEARCH_12_PARAMETERS_MSMS_AUTO_CALIBRATION_OUT_c2	0
RESULTS_SEARCH_12_PARAMETERS_MSMS_AUTO_CALIBRATION_OUT_file	3
RESULTS_SEARCH_12_PARAMETERS_MSMS_AUTO_CALIBRATION_OUT_partnumber	12
RESULTS_SEARCH_12_PARAMETERS_MSMS_AUTO_CALIBRATION_OUT_polyorder	1
RESULTS_SEARCH_12_PARAMETERS_MSMS_AUTO_CALIBRATION_OUT_sample	1
RESULTS_SEARCH_12_PARAMETERS_MSMS_AUTO_CALIBRATION_OUT_squareroot	FALSE
RESULTS_SEARCH_12_PARAMETERS_MAX_PRECURSORS_FRAGLET	5
RESULTS_SEARCH_12_PARAMETERS_MAX_PRECURSORS_TAGLET	1
RESULTS_SEARCH_12_PARAMETERS_PRECURSORS_DR_FRAGLET	10
RESULTS_SEARCH_12_PARAMETERS_PRECURSORS_DR_TAGLET	3
RESULTS_SEARCH_12_PARAMETERS_DEFAULT_CHARGE_STATE_1_charge	1
RESULTS_SEARCH_12_PARAMETERS_DEFAULT_CHARGE_STATE_1_probability	1
RESULTS_SEARCH_12_PARAMETERS_DEFAULT_CHARGE_STATE_2_charge	2
RESULTS_SEARCH_12_PARAMETERS_DEFAULT_CHARGE_STATE_2_probability	1
RESULTS_SEARCH_12_PARAMETERS_DEFAULT_CHARGE_STATE_3_charge	3
RESULTS_SEARCH_12_PARAMETERS_DEFAULT_CHARGE_STATE_3_probability	1
RESULTS_SEARCH_12_PARAMETERS_VERSION	5.0.2.0, 5346
RESULTS_SEARCH_12_PARAMETERS_PARAGON_VERSION	5.0.2.0, 5174
RESULTS_SEARCH_12_PARAMETERS_APPLICATION	ProteinPilot(tm) Software
RESULTS_SEARCH_12_PARAMETERS_PROGROUP_alternativedispositionmaximumfoldprobabilitydrop	100
RESULTS_SEARCH_12_PARAMETERS_PROGROUP_alternativedispositionmaximumfoldscoredrop	2
RESULTS_SEARCH_12_PARAMETERS_PROGROUP_autodiscordantpeptidethreshold	0.3
RESULTS_SEARCH_12_PARAMETERS_PROGROUP_bayesconfidencecalclulation	TRUE
RESULTS_SEARCH_12_PARAMETERS_PROGROUP_calibrateconfidence	TRUE
RESULTS_SEARCH_12_PARAMETERS_PROGROUP_compresspeptides	FALSE
RESULTS_SEARCH_12_PARAMETERS_PROGROUP_confidencepercentthresholdforexcludingothersfromquant	15
RESULTS_SEARCH_12_PARAMETERS_PROGROUP_confidencepercentthresholdforincludingselfinquant	15
RESULTS_SEARCH_12_PARAMETERS_PROGROUP_donotstoremspeaklists	FALSE
RESULTS_SEARCH_12_PARAMETERS_PROGROUP_fasta	C:\AB SCIEX\ProteinPilot Data\SearchDatabases\2019_UP_Mouse_Con.fasta
RESULTS_SEARCH_12_PARAMETERS_PROGROUP_featuregroupminpepconf	0.66
RESULTS_SEARCH_12_PARAMETERS_PROGROUP_featuregroupminups	0.47
RESULTS_SEARCH_12_PARAMETERS_PROGROUP_focusingintersection	4
RESULTS_SEARCH_12_PARAMETERS_PROGROUP_focusingminimummatchconfidence	0.1
RESULTS_SEARCH_12_PARAMETERS_PROGROUP_focusingminunusedprotscore	02:24:00
RESULTS_SEARCH_12_PARAMETERS_PROGROUP_focusingsubsetcutoff	6
RESULTS_SEARCH_12_PARAMETERS_PROGROUP_intersection	1.3
RESULTS_SEARCH_12_PARAMETERS_PROGROUP_minimummatchconfidencecutoff	0.001
RESULTS_SEARCH_12_PARAMETERS_PROGROUP_minunusedprotscore	0.0458
RESULTS_SEARCH_12_PARAMETERS_PROGROUP_subsetcutoff	2
RESULTS_SEARCH_12_PARAMETERS_PROGROUP_uniprotservicehttpssupported	TRUE
RESULTS_SEARCH_12_PARAMETERS_PROGROUP_unusedprotscorethresholdforexcludingothersfromquant	1.3
RESULTS_SEARCH_12_PARAMETERS_PEAKLIST_count	3567
RESULTS_SEARCH_12_PARAMETERS_PEAKLIST_filenumber	3
RESULTS_SEARCH_12_PARAMETERS_PEAKLIST_original_count	3567
RESULTS_SEARCH_12_PARAMETERS_PEAKLIST_originalfilename	C:\Data\Flores_Mirales\06202019\mus2\06172019_AFlor_Cath_2_A3.mgf
RESULTS_SEARCH_12_PARAMETERS_PEAKLIST_partnumber	12
RESULTS_SEARCH_12_PARAMETERS_QUANT_TYPE_background_correction	FALSE
RESULTS_SEARCH_12_PARAMETERS_QUANT_TYPE_bias_correction	TRUE
RESULTS_SEARCH_12_PARAMETERS_QUANT_TYPE_keep_extreme_peptides_over_fraction	0
RESULTS_SEARCH_12_PARAMETERS_QUANT_TYPE_low_confidence_check	TRUE
RESULTS_SEARCH_12_PARAMETERS_QUANT_TYPE_low_intensity_check	TRUE
RESULTS_SEARCH_12_PARAMETERS_QUANT_TYPE_median_statistic	TRUE
RESULTS_SEARCH_12_PARAMETERS_QUANT_TYPE_mod_check	TRUE
RESULTS_SEARCH_12_PARAMETERS_QUANT_TYPE_quant_threshold	-1
RESULTS_SEARCH_12_PARAMETERS_QUANT_TYPE_quant_threshold_sn	9
RESULTS_SEARCH_12_PARAMETERS_QUANT_TYPE_separate_searches	FALSE
RESULTS_SEARCH_12_PARAMETERS_QUANT_TYPE_shared_msms_check	TRUE
RESULTS_SEARCH_12_PARAMETERS_PARAGON_METHOD_SETTINGS_UI_SAMPLE_TYPE	Identification
RESULTS_SEARCH_12_PARAMETERS_PARAGON_METHOD_SETTINGS_UI_CYS_ALKYLATION	Iodoacetamide
RESULTS_SEARCH_12_PARAMETERS_PARAGON_METHOD_SETTINGS_UI_DIGESTION	Trypsin
RESULTS_SEARCH_12_PARAMETERS_PARAGON_METHOD_SETTINGS_UI_INSTRUMENT	Orbi MS (1-3ppm), Orbi MS/MS
RESULTS_SEARCH_12_PARAMETERS_PARAGON_METHOD_SETTINGS_UI_SEARCH_EFFORT	Rapid
RESULTS_SEARCH_12_PARAMETERS_PARAGON_METHOD_SETTINGS_UI_USER_NAME	ESC308585\MSPF
RESULTS_SEARCH_12_PARAMETERS_PARAGON_METHOD_SETTINGS_UI_MACHINE_NAME	ESC308585
RESULTS_SEARCH_12_PARAMETERS_PARAGON_METHOD_SETTINGS_UI_SEARCH_ID	6.36966e+17
RESULTS_SEARCH_12_PARAMETERS_PARAGON_METHOD_SETTINGS_UI_START_TIME	2019-06-19 14:49:40
RESULTS_SEARCH_12_PARAMETERS_PARAGON_METHOD_SETTINGS_UI_MIN_UNUSED_PROTSCORE	0.0458
RESULTS_SEARCH_12_PARAMETERS_PARAGON_METHOD_SETTINGS_UI_PSPEP	TRUE
RESULTS_GROUPRESULTSUMMARY_1_confidence	0.99
RESULTS_GROUPRESULTSUMMARY_1_distinctpeptides	4206
RESULTS_GROUPRESULTSUMMARY_1_proteinsbeforegroupping	1049
RESULTS_GROUPRESULTSUMMARY_1_proteinsidentified	347
RESULTS_GROUPRESULTSUMMARY_1_spectraidentified	13003
RESULTS_GROUPRESULTSUMMARY_2_confidence	0.95
RESULTS_GROUPRESULTSUMMARY_2_distinctpeptides	4349
RESULTS_GROUPRESULTSUMMARY_2_proteinsbeforegroupping	1525
RESULTS_GROUPRESULTSUMMARY_2_proteinsidentified	460
RESULTS_GROUPRESULTSUMMARY_2_spectraidentified	13275
RESULTS_GROUPRESULTSUMMARY_3_confidence	0.66
RESULTS_GROUPRESULTSUMMARY_3_distinctpeptides	4406
RESULTS_GROUPRESULTSUMMARY_3_proteinsbeforegroupping	1642
RESULTS_GROUPRESULTSUMMARY_3_proteinsidentified	500
RESULTS_GROUPRESULTSUMMARY_3_spectraidentified	13366
RESULTS_GROUPRESULTSUMMARY_4_confidence	0.100088
RESULTS_GROUPRESULTSUMMARY_4_distinctpeptides	4542
RESULTS_GROUPRESULTSUMMARY_4_proteinsbeforegroupping	1905-07-27
RESULTS_GROUPRESULTSUMMARY_4_proteinsidentified	617
RESULTS_GROUPRESULTSUMMARY_4_spectraidentified	13596

## Sheet: Metadata Calculations
	Subsearch	Search string	present		File index down	Part number	Spectra - 'original'	Spectra 'count' - non-empty?	max original Spectra for part	Max non-empty spectra for part	File Index for first only
	1	RESULTS_SEARCH_1_PARAMETERS_PEAKLIST_rawdatafilename		C:\Data\Flores_Mirales\06202019\mus2\06172019_AFlor_Cath_2_A1.mgf	1	1	3663	3663	3663	3663	1
	2	RESULTS_SEARCH_2_PARAMETERS_PEAKLIST_rawdatafilename		C:\Data\Flores_Mirales\06202019\mus2\06172019_AFlor_Cath_2_A1.mgf	1	2	3670	3670	3670	3670
	3	RESULTS_SEARCH_3_PARAMETERS_PEAKLIST_rawdatafilename		C:\Data\Flores_Mirales\06202019\mus2\06172019_AFlor_Cath_2_A1.mgf	1	3	3692	3692	3692	3692
1 if Rapid, 2 if Thor	4	RESULTS_SEARCH_4_PARAMETERS_PEAKLIST_rawdatafilename		C:\Data\Flores_Mirales\06202019\mus2\06172019_AFlor_Cath_2_A1.mgf	1	4	3690	3690	3690	3690
1	5	RESULTS_SEARCH_5_PARAMETERS_PEAKLIST_rawdatafilename		C:\Data\Flores_Mirales\06202019\mus2\06172019_AFlor_Cath_2_A2.mgf	2	5	3621	3621	3621	3621	2
	6	RESULTS_SEARCH_6_PARAMETERS_PEAKLIST_rawdatafilename		C:\Data\Flores_Mirales\06202019\mus2\06172019_AFlor_Cath_2_A2.mgf	2	6	3635	3635	3635	3635
# Segments	7	RESULTS_SEARCH_7_PARAMETERS_PEAKLIST_rawdatafilename		C:\Data\Flores_Mirales\06202019\mus2\06172019_AFlor_Cath_2_A2.mgf	2	7	3646	3646	3646	3646
12	8	RESULTS_SEARCH_8_PARAMETERS_PEAKLIST_rawdatafilename		C:\Data\Flores_Mirales\06202019\mus2\06172019_AFlor_Cath_2_A2.mgf	2	8	3645	3645	3645	3645
(max is 1000 segments)	9	RESULTS_SEARCH_9_PARAMETERS_PEAKLIST_rawdatafilename		C:\Data\Flores_Mirales\06202019\mus2\06172019_AFlor_Cath_2_A3.mgf	3	9	3538	3538	3538	3538	3
	10	RESULTS_SEARCH_10_PARAMETERS_PEAKLIST_rawdatafilename		C:\Data\Flores_Mirales\06202019\mus2\06172019_AFlor_Cath_2_A3.mgf	3	10	3563	3563	3563	3563
	11	RESULTS_SEARCH_11_PARAMETERS_PEAKLIST_rawdatafilename		C:\Data\Flores_Mirales\06202019\mus2\06172019_AFlor_Cath_2_A3.mgf	3	11	3579	3579	3579	3579
	12	RESULTS_SEARCH_12_PARAMETERS_PEAKLIST_rawdatafilename		C:\Data\Flores_Mirales\06202019\mus2\06172019_AFlor_Cath_2_A3.mgf	3	12	3567	3567	3567	3567

## Sheet: Curated Metadata
Group file metadata term	Metadata Description (of raw extracted item)	Use Partial Match	Term in Stream	Derived (Calculated)	Value	Validation check/comments	Conversion type, if done	Conversion factor		Metadata Category	Metadata Description of Final Metadata Item (converted manually, if applicable)	Value
	Group filename			1						Attributes - General	Group filename	06172019_AFlor_Cath_2_A123_R1.group
RESULTS_SEARCH_1_PARAMETERS_PARAGON_METHOD_SETTINGS_UI_START_TIME	Start date		1		2019-06-19 14:49:40					Attributes - General	Start date	2019-06-19 14:49:40
RESULTS_SEARCH_STAT_search_begin_time_clock	Start time		1		2019-06-19 14:49:40					Attributes - General	Start time	2019-06-19 14:49:40
RESULTS_SEARCH_1_PARAMETERS_PARAGON_METHOD_SETTINGS_UI_USER_NAME	User name		1		ESC308585\MSPF					Attributes - General	User name	ESC308585\MSPF
RESULTS_SEARCH_1_xml:id	Internal search identifier number		1	1						Attributes - General	Internal search identifier number
PARAMETERS_PEAKLIST_original_count				1						Attributes - Input data	Number of spectra in search	43509
PARAMETERS_PEAKLIST_count				1						Attributes - Input data	Number of non-empty spectra in search	43509
PARAMETERS_PEAKLIST_filenumber	Number of input files	1	1	1	3					Attributes - Input data	Number of input files	3
RESULTS_SEARCH_1_PARAMETERS_PARAGON_METHOD_SETTINGS_UI_SAMPLE_TYPE	Sample Type		1		Identification					Parameters - User settings	Sample Type	Identification
RESULTS_SEARCH_1_PARAMETERS_PARAGON_METHOD_SETTINGS_UI_CYS_ALKYLATION	Cysteine Alkylation		1		Iodoacetamide					Parameters - User settings	Cysteine Alkylation	Iodoacetamide
RESULTS_SEARCH_1_PARAMETERS_PARAGON_METHOD_SETTINGS_UI_DIGESTION	Digestion		1		Trypsin					Parameters - User settings	Digestion	Trypsin
RESULTS_SEARCH_1_PARAMETERS_PARAGON_METHOD_SETTINGS_UI_SPECIAL_FACTOR	Special Factors									Parameters - User settings	Special Factors
RESULTS_SEARCH_1_PARAMETERS_PARAGON_METHOD_SETTINGS_UI_INSTRUMENT	Instrument		1		Orbi MS (1-3ppm), Orbi MS/MS					Parameters - User settings	Instrument	Orbi MS (1-3ppm), Orbi MS/MS
RESULTS_SEARCH_1_PARAMETERS_PARAGON_METHOD_SETTINGS_UI_SPECIES	Species									Parameters - User settings	Species
RESULTS_SEARCH_1_PARAMETERS_PARAGON_METHOD_SETTINGS_UI_SEARCH_EFFORT	Search Effort		1		Rapid					Parameters - User settings	Search Effort	Rapid
RESULTS_SEARCH_1_PARAMETERS_PARAGON_METHOD_SETTINGS_UI_ID_FOCUS	ID Focus									Parameters - User settings	ID Focus
RESULTS_SEARCH_1_PARAMETERS_PARAGON_METHOD_SETTINGS_UI_MIN_UNUSED_PROTSCORE	Minimum Unused ProtScore		1		0.0458					Parameters - User settings	Minimum Unused ProtScore	0.0458
RESULTS_SEARCH_1_PARAMETERS_PARAGON_METHOD_SETTINGS_UI_PSPEP	FDR Analysis		1		TRUE		Logical to English			Parameters - User settings	FDR Analysis	Yes
	Quantitation						Logical to English			Parameters - User settings	Quantitation
RESULTS_SEARCH_1_PARAMETERS_QUANT_TYPE_background_correction	Background Correction		1		FALSE		Logical to English			Parameters - User settings	Background Correction	No
RESULTS_SEARCH_1_PARAMETERS_QUANT_TYPE_bias_correction	Bias Correction		1		TRUE		Logical to English			Parameters - User settings	Bias Correction	Yes
	Channel to use as denominator in ratios									Parameters - User settings	Channel to use as denominator in ratios
RESULTS_SEARCH_1_PARAMETERS_chemical_data_edited	Modified Data Dictionary or Parameter Translation		1		FALSE		Logical to English			Parameters - User settings	Modified Data Dictionary or Parameter Translation	No
RESULTS_SEARCH_1_PARAMETERS_FASTA_filename	Database filename		1		C:\AB SCIEX\ProteinPilot Data\SearchDatabases\2019_UP_Mouse_Con.fasta					Attributes - Search database	Database filename	C:\AB SCIEX\ProteinPilot Data\SearchDatabases\2019_UP_Mouse_Con.fasta
				1						Attributes - Search database	Number of Proteins in Database	55354
RESULTS_SEARCH_STAT_num_proteins	Number of proteins searched		1		110708					Attributes - Search database	Number of proteins searched	110708
				1						Attributes - Search database	Number of Residues in Database	0
RESULTS_SEARCH_STAT_num_residues	Number of residues searched		1		0					Attributes - Search database	Number of residues searched	0
RESULTS_SEARCH_STAT_computer_memory	RAM (MB)		1		12285					Attributes - Hardware	RAM (MB)	12285
RESULTS_SEARCH_STAT_computer_name	Computer name		1		ESC308585					Attributes - Hardware	Computer name	ESC308585
RESULTS_SEARCH_STAT_number_cores	Number of cores in computer		1		8					Attributes - Hardware	Number of cores in computer	8
RESULTS_SEARCH_STAT_number_processors	Number of threads (double cores if hyperthreading on)		1		8					Attributes - Hardware	Number of threads (double cores if hyperthreading on)	8
RESULTS_SEARCH_STAT_number_licensed_tasks	Number of cores licensed to use		1		2					Attributes - Software environment	Number of cores licensed to use	2
RESULTS_SEARCH_STAT_os	Operating system		1		Windows 7 Ultimate (6.1.7600)					Attributes - Software environment	Operating system	Windows 7 Ultimate (6.1.7600)
RESULTS_SEARCH_1_PARAMETERS_VERSION	ProteinPilot Software Version		1		5.0.2.0, 5346					Attributes - Software environment	ProteinPilot Software Version	5.0.2.0, 5346
RESULTS_SEARCH_1_PARAMETERS_PARAGON_VERSION	Paragon Algorithm Version		1		5.0.2.0, 5174					Attributes - Software environment	Paragon Algorithm Version	5.0.2.0, 5174
RESULTS_SEARCH_1_PARAMETERS_APPLICATION	Application name		1		ProteinPilot(tm) Software					Attributes - Software environment	Application name	ProteinPilot(tm) Software
RESULTS_GROUPRESULTSUMMARY_1_confidence	Confidence of first row in summary statistics ID statistics		1		0.99		Fraction to %	100		Statistics - Protein Summary Table	Percent Confidence of first row in Summary Statistics ID Statistics	99
RESULTS_GROUPRESULTSUMMARY_1_distinctpeptides	Distinct peptides associated with 99% confidence proteins		1		4206					Statistics - Protein Summary Table	Distinct peptides associated with 99% confidence proteins	4206
RESULTS_GROUPRESULTSUMMARY_1_proteinsbeforegroupping	Proteins before grouping (99% confidence)		1		1049					Statistics - Protein Summary Table	Proteins before grouping (99% confidence)	1049
RESULTS_GROUPRESULTSUMMARY_1_proteinsidentified	Proteins detected (99% confidence)		1		347					Statistics - Protein Summary Table	Proteins detected (99% confidence)	347
RESULTS_GROUPRESULTSUMMARY_1_spectraidentified	Spectra associated with 99% confidence proteins		1		13003					Statistics - Protein Summary Table	Spectra associated with 99% confidence proteins	13003
RESULTS_GROUPRESULTSUMMARY_2_confidence	Confidence of second row in Summary Statistics ID statistics		1		0.95		Fraction to %	100		Statistics - Protein Summary Table	Percent Confidence of first row in Summary Statistics ID Statistics	95
RESULTS_GROUPRESULTSUMMARY_2_distinctpeptides	Distinct peptides associated with 95% confidence proteins		1		4349					Statistics - Protein Summary Table	Distinct peptides associated with 95% confidence proteins	4349
RESULTS_GROUPRESULTSUMMARY_2_proteinsbeforegroupping	Proteins before grouping (95% confidence)		1		1525					Statistics - Protein Summary Table	Proteins before grouping (95% confidence)	1525
RESULTS_GROUPRESULTSUMMARY_2_proteinsidentified	Proteins detected (95% confidence)		1		460					Statistics - Protein Summary Table	Proteins detected (95% confidence)	460
RESULTS_GROUPRESULTSUMMARY_2_spectraidentified	Spectra associated with 95% confidence proteins		1		13275					Statistics - Protein Summary Table	Spectra associated with 95% confidence proteins	13275
RESULTS_GROUPRESULTSUMMARY_3_confidence	Confidence of third row in summary statistics ID statistics		1		0.66		Fraction to %	100		Statistics - Protein Summary Table	Percent Confidence of first row in Summary Statistics ID Statistics	66
RESULTS_GROUPRESULTSUMMARY_3_distinctpeptides	Distinct peptides associated with 66% confidence proteins		1		4406					Statistics - Protein Summary Table	Distinct peptides associated with 66% confidence proteins	4406
RESULTS_GROUPRESULTSUMMARY_3_proteinsbeforegroupping	Proteins before grouping (66% confidence)		1		1642					Statistics - Protein Summary Table	Proteins before grouping (66% confidence)	1642
RESULTS_GROUPRESULTSUMMARY_3_proteinsidentified	Proteins detected (66% confidence)		1		500					Statistics - Protein Summary Table	Proteins detected (66% confidence)	500
RESULTS_GROUPRESULTSUMMARY_3_spectraidentified	Spectra associated with 66% confidence proteins		1		13366					Statistics - Protein Summary Table	Spectra associated with 66% confidence proteins	13366
RESULTS_GROUPRESULTSUMMARY_4_confidence	Confidence of fourth row in Summary Statistics ID statistics		1		0.100088		Fraction to %	100		Statistics - Protein Summary Table	Percent Confidence of first row in Summary Statistics ID Statistics	10.0088
RESULTS_GROUPRESULTSUMMARY_4_distinctpeptides	Distinct peptides associated with 10% confidence proteins		1		4542					Statistics - Protein Summary Table	Distinct peptides associated with 10% confidence proteins	4542
RESULTS_GROUPRESULTSUMMARY_4_proteinsbeforegroupping	Proteins before grouping (10% confidence)		1		2035					Statistics - Protein Summary Table	Proteins before grouping (10% confidence)	2035
RESULTS_GROUPRESULTSUMMARY_4_proteinsidentified	Proteins detected (10% confidence)		1		617					Statistics - Protein Summary Table	Proteins detected (10% confidence)	617
RESULTS_GROUPRESULTSUMMARY_4_spectraidentified	Spectra associated with 10% confidence proteins		1		13596					Statistics - Protein Summary Table	Spectra associated with 10% confidence proteins	13596
PARAMETERS_PEAKLIST_partnumber	Number of segments the input data are broken into	1	1	1	12					Parameters - Search Dimension Factors	Number of segments the input data are broken into	12
				1						Parameters - Search Dimension Factors	Number of searches per segment (2 for Thorough, 1 for Rapid)	1
				1						Parameters - Search Dimension Factors	Number of apparent sub-searches in group file	12
RESULTS_SEARCH_1_PARAMETERS_do_reverse_search	Do reversed search		1		TRUE					Parameters - Search Dimension Factors	Do reversed search	TRUE
RESULTS_SEARCH_1_PARAMETERS_QUANT_TYPE_separate_searches	Do separate searches for each plex in MS1 quantitation		1		FALSE					Parameters - Search Dimension Factors	Do separate searches for each plex in MS1 quantitation	FALSE
RESULTS_SEARCH_1_PARAMETERS_maxresults	Maximum number of hypotheses to keep per spectrum		1		15					Parameters - Search Dimension Factors	Maximum number of hypotheses to keep per spectrum	15
RESULTS_SEARCH_1_PARAMETERS_MSTOLERANCE_type	MS1 initial mass error tolerance type		1		dalton					Parameters - Identification - Mass accuracy	MS1 initial mass error tolerance type	dalton
RESULTS_SEARCH_1_PARAMETERS_MSTOLERANCE_value	MS1 initial mass error tolerance value		1		0.05					Parameters - Identification - Mass accuracy	MS1 initial mass error tolerance value	0.05
RESULTS_SEARCH_1_PARAMETERS_MSMSTOLERANCE_type	MS2 initial mass error tolerance type		1		dalton					Parameters - Identification - Mass accuracy	MS2 initial mass error tolerance type	dalton
RESULTS_SEARCH_1_PARAMETERS_MSMSTOLERANCE_value	MS2 initial mass error tolerance value		1		0.1					Parameters - Identification - Mass accuracy	MS2 initial mass error tolerance value	0.1
RESULTS_SEARCH_1_PARAMETERS_MS_STANDARD_DEVIATION_type	MS1 final mass error standard deviation type		1		dalton					Parameters - Identification - Mass accuracy	MS1 final mass error standard deviation type	dalton
RESULTS_SEARCH_1_PARAMETERS_MS_STANDARD_DEVIATION_value	MS1 final mass error standard deviation value		1		0.0025					Parameters - Identification - Mass accuracy	MS1 final mass error standard deviation value	0.0025
RESULTS_SEARCH_1_PARAMETERS_MSMS_STANDARD_DEVIATION_type	MS2 final mass error standard deviation type		1		dalton					Parameters - Identification - Mass accuracy	MS2 final mass error standard deviation type	dalton
RESULTS_SEARCH_1_PARAMETERS_MSMS_STANDARD_DEVIATION_value	MS2 final mass error standard deviation value		1		0.004					Parameters - Identification - Mass accuracy	MS2 final mass error standard deviation value	0.004
RESULTS_SEARCH_1_PARAMETERS_do_multiprecursor_search	Use multi-precursor search function		1		TRUE					Parameters - Identification - Multi-precursor search	Use multi-precursor search function	TRUE
RESULTS_SEARCH_1_PARAMETERS_MAX_PRECURSORS_FRAGLET	Maximum number of different precursor masses to try to match to in the Fraglet stage when doing multi-precursor search		1		5					Parameters - Identification - Multi-precursor search	Maximum number of different precursor masses to try to match to in the Fraglet stage when doing multi-precursor search	5
RESULTS_SEARCH_1_PARAMETERS_PRECURSORS_DR_FRAGLET	Maximum dynamic range gap of secondary precursors vs primary precursor in the Fraglet stage when doing multi-precursor search		1		10					Parameters - Identification - Multi-precursor search	Maximum dynamic range gap of secondary precursors vs primary precursor in the Fraglet stage when doing multi-precursor search	10
RESULTS_SEARCH_1_PARAMETERS_MAX_PRECURSORS_TAGLET	Maximum number of different precursor masses to try to match to in the Taglet stage when doing multi-precursor search		1		1					Parameters - Identification - Multi-precursor search	Maximum number of different precursor masses to try to match to in the Taglet stage when doing multi-precursor search	1
RESULTS_SEARCH_1_PARAMETERS_PRECURSORS_DR_TAGLET	Maximum dynamic range gap of secondary precursors vs primary precursor in the Taglet stage when doing multi-precursor search		1		3					Parameters - Identification - Multi-precursor search	Maximum dynamic range gap of secondary precursors vs primary precursor in the Taglet stage when doing multi-precursor search	3
RESULTS_SEARCH_1_PARAMETERS_DEFAULT_CHARGE_STATE_1_charge	First charge state to consider when precursor z is not determined		1		1					Parameters - Identification - Charge ambiguity	First charge state to consider when precursor z is not determined	1
RESULTS_SEARCH_1_PARAMETERS_DEFAULT_CHARGE_STATE_1_probability	Probability of first charge state to consider when precursor z is not determined		1		1					Parameters - Identification - Charge ambiguity	Probability of first charge state to consider when precursor z is not determined	1
RESULTS_SEARCH_1_PARAMETERS_DEFAULT_CHARGE_STATE_2_charge	Second charge state to consider when precursor z is not determined		1		2					Parameters - Identification - Charge ambiguity	Second charge state to consider when precursor z is not determined	2
RESULTS_SEARCH_1_PARAMETERS_DEFAULT_CHARGE_STATE_2_probability	Probability of second charge state to consider when precursor z is not determined		1		1					Parameters - Identification - Charge ambiguity	Probability of second charge state to consider when precursor z is not determined	1
RESULTS_SEARCH_1_PARAMETERS_DEFAULT_CHARGE_STATE_3_charge	Third charge state to consider when precursor z is not determined		1		3					Parameters - Identification - Charge ambiguity	Third charge state to consider when precursor z is not determined	3
RESULTS_SEARCH_1_PARAMETERS_DEFAULT_CHARGE_STATE_3_probability	Probability of third charge state to consider when precursor z is not determined		1		1					Parameters - Identification - Charge ambiguity	Probability of third charge state to consider when precursor z is not determined	1
RESULTS_SEARCH_1_PARAMETERS_DEFAULT_CHARGE_STATE_4_charge	Fourth charge state to consider when precursor z is not determined									Parameters - Identification - Charge ambiguity	Fourth charge state to consider when precursor z is not determined
RESULTS_SEARCH_1_PARAMETERS_DEFAULT_CHARGE_STATE_4_probability	Probability of fourth charge state to consider when precursor z is not determined									Parameters - Identification - Charge ambiguity	Probability of fourth charge state to consider when precursor z is not determined
RESULTS_SEARCH_1_PARAMETERS_PROGROUP_bayesconfidencecalclulation	Use Bayesian protein confidence calculation		1		TRUE					Parameters - Protein Grouping	Use Bayesian protein confidence calculation	TRUE
RESULTS_SEARCH_1_PARAMETERS_PROGROUP_calibrateconfidence	Use peptide FDR analysis to recalibrate peptide confidences		1		TRUE					Parameters - Protein Grouping	Use peptide FDR analysis to recalibrate peptide confidences	TRUE
RESULTS_SEARCH_1_PARAMETERS_PROGROUP_focusingintersection	In mid-Pro Group, minimum Intersection ProtScore to be in Same Group		1		4					Parameters - Protein Grouping	In mid-Pro Group, minimum Intersection ProtScore to be in Same Group	4
RESULTS_SEARCH_1_PARAMETERS_PROGROUP_focusingminunusedprotscore	In mid-Pro Group, minimum Unused ProtScore to keep a Group		1		0.1					Parameters - Protein Grouping	In mid-Pro Group, minimum Unused ProtScore to keep a Group	0.1
RESULTS_SEARCH_1_PARAMETERS_PROGROUP_focusingsubsetcutoff	In mid-Pro Group, keep competitor proteins with ProtScore units from winner		1		6					Parameters - Protein Grouping	In mid-Pro Group, keep competitor proteins with ProtScore units from winner	6
RESULTS_SEARCH_1_PARAMETERS_PROGROUP_intersection	In final Pro Group, minimum Intersection ProtScore to be in same group		1		1.3					Parameters - Protein Grouping	In final Pro Group, minimum Intersection ProtScore to be in same group	1.3
RESULTS_SEARCH_1_PARAMETERS_PROGROUP_minunusedprotscore	In final Pro Group, minimum Unused ProtScore to keep a group		1		0.0458					Parameters - Protein Grouping	In final Pro Group, minimum Unused ProtScore to keep a group	0.0458
RESULTS_SEARCH_1_PARAMETERS_PROGROUP_subsetcutoff	In final Pro Group, keep competitor proteins with ProtScore units from winner		1		2					Parameters - Protein Grouping	In final Pro Group, keep competitor proteins with ProtScore units from winner	2
RESULTS_SEARCH_1_PARAMETERS_QUANT_TYPE_background_correction	Do isobaric quant background correction algorithm		1		FALSE					Parameters - Quantitation - processing	Do isobaric quant background correction algorithm	FALSE
RESULTS_SEARCH_1_PARAMETERS_QUANT_TYPE_bias_correction	Normalize the central tendency of protein ratios to be unity		1		TRUE					Parameters - Quantitation - processing	Normalize the central tendency of protein ratios to be unity	TRUE
RESULTS_SEARCH_1_PARAMETERS_QUANT_TYPE_median_statistic	Compute protein-level ratios from the median of peptide ratios		1		TRUE					Parameters - Quantitation - processing	Compute protein-level ratios from the median of peptide ratios	TRUE
RESULTS_SEARCH_1_PARAMETERS_QUANT_TYPE_quant_threshold	Quant threshold setting no longer used		1		-1					Parameters - Quantitation - processing	Quant threshold setting no longer used	-1
RESULTS_SEARCH_1_PARAMETERS_QUANT_TYPE_quant_threshold_sn	Use measures for quantitation if signal to noise is greater than		1		9					Parameters - Quantitation - processing	Use measures for quantitation if signal to noise is greater than	9
RESULTS_SEARCH_1_PARAMETERS_max_quant_labels	Maximum number of labels allowed on a peptide for it to be used for quantitation		1		35					Parameters - Quantitation - curation	Maximum number of labels allowed on a peptide for it to be used for quantitation	35
RESULTS_SEARCH_1_PARAMETERS_QUANT_TYPE_keep_extreme_peptides_over_fraction	Include extreme ratios in the protein ratio calculation if the fraction of peptides from a protein having extreme ratios is greater than		1		0					Parameters - Quantitation - curation	Include extreme ratios in the protein ratio calculation if the fraction of peptides from a protein having extreme ratios is greater than	0
RESULTS_SEARCH_1_PARAMETERS_QUANT_TYPE_low_confidence_check	Exclude quantitation data if identification confidence does not pass a threshold value		1		TRUE					Parameters - Quantitation - curation	Exclude quantitation data if identification confidence does not pass a threshold value	TRUE
RESULTS_SEARCH_1_PARAMETERS_QUANT_TYPE_low_intensity_check	Exclude quantitation data if a minimum intensity is not passed		1		TRUE					Parameters - Quantitation - curation	Exclude quantitation data if a minimum intensity is not passed	TRUE
RESULTS_SEARCH_1_PARAMETERS_QUANT_TYPE_mod_check	Exclude quantitation data based on discordant peptide logic		1		TRUE					Parameters - Quantitation - curation	Exclude quantitation data based on discordant peptide logic	TRUE
RESULTS_SEARCH_1_PARAMETERS_QUANT_TYPE_shared_msms_check	Exclude quantitation data using sharing logic		1		TRUE					Parameters - Quantitation - curation	Exclude quantitation data using sharing logic	TRUE
RESULTS_SEARCH_1_PARAMETERS_PROGROUP_unusedprotscorethresholdforexcludingothersfromquant	Minimum protein confidence to consider a protein confident and capable of excluding spectra as shared		1		1.3					Parameters - Quantitation - curation	Minimum protein confidence to consider a protein confident and capable of excluding spectra as shared	1.3
RESULTS_SEARCH_1_PARAMETERS_PROGROUP_confidencepercentthresholdforexcludingothersfromquant	Minimum peptide percent confidence from a confident protein to consider a spectrum shared		1		15					Parameters - Quantitation - curation	Minimum peptide percent confidence from a confident protein to consider a spectrum shared	15
RESULTS_SEARCH_1_PARAMETERS_PROGROUP_confidencepercentthresholdforincludingselfinquant	Minimum peptide confidence to be used for quantitation		1		15					Parameters - Quantitation - curation	Minimum peptide confidence to be used for quantitation	15
RESULTS_SEARCH_1_PARAMETERS_PROGROUP_autodiscordantpeptidethreshold	Consider a peptide discordant if joint feature probability less than		1		0.3					Parameters - Quantitation - curation	Consider a peptide discordant if joint feature probability less than	0.3
RESULTS_SEARCH_1_PARAMETERS_PROGROUP_compresspeptides	Show results only for distinct peptides, suppressing redundancy		1		FALSE					Parameters - Non-functional	Show results only for distinct peptides, suppressing redundancy	FALSE
RESULTS_SEARCH_1_PARAMETERS_PROGROUP_donotstoremspeaklists	Do not store MS1 level data		1		FALSE					Parameters - Non-functional	Do not store MS1 level data	FALSE
RESULTS_SEARCH_STAT_search_begin_time_clock	Start time - Search		1		2019-06-19 14:49:40					Statistics - Processing Times - Start&Stop Clock Times	Start time - Search	2019-06-19 14:49:40
RESULTS_SEARCH_STAT_search_end_time_clock	End time - Search		1		2019-06-19 15:06:26					Statistics - Processing Times - Start&Stop Clock Times	End time - Search	2019-06-19 15:06:26
RESULTS_SEARCH_STAT_stage_searching_begin_time_clock	Start time - Identification algorithm stages		1		2019-06-19 14:50:29					Statistics - Processing Times - Start&Stop Clock Times	Start time - Identification algorithm stages	2019-06-19 14:50:29
RESULTS_SEARCH_STAT_stage_searching_end_time_clock	End time - Identification algorithm stages		1		2019-06-19 15:05:32					Statistics - Processing Times - Start&Stop Clock Times	End time - Identification algorithm stages	2019-06-19 15:05:32
RESULTS_SEARCH_STAT_stage_signal_processing_begin_time_clock	Start time - Signal processing stage		1		2019-06-19 14:49:40					Statistics - Processing Times - Start&Stop Clock Times	Start time - Signal processing stage	2019-06-19 14:49:40
RESULTS_SEARCH_STAT_stage_signal_processing_end_time_clock	End time - Signal processing stage		1		2019-06-19 14:50:29					Statistics - Processing Times - Start&Stop Clock Times	End time - Signal processing stage	2019-06-19 14:50:29
RESULTS_SEARCH_STAT_stage_waiting_begin_time_clock	Start time - Waiting stage		1		2019-06-19 14:50:29					Statistics - Processing Times - Start&Stop Clock Times	Start time - Waiting stage	2019-06-19 14:50:29
RESULTS_SEARCH_STAT_stage_waiting_end_time_clock	End time - Waiting stage		1		2019-06-19 14:50:29					Statistics - Processing Times - Start&Stop Clock Times	End time - Waiting stage	2019-06-19 14:50:29
RESULTS_SEARCH_STAT_task_fraglet_exe_begin_time_clock	Start time - Fraglet Algorithm search stage		1		2019-06-19 14:50:33					Statistics - Processing Times - Start&Stop Clock Times	Start time - Fraglet Algorithm search stage	2019-06-19 14:50:33
RESULTS_SEARCH_STAT_task_fraglet_exe_end_time_clock	End time - Fraglet Algorithm search stage		1		2019-06-19 14:57:50					Statistics - Processing Times - Start&Stop Clock Times	End time - Fraglet Algorithm search stage	2019-06-19 14:57:50
RESULTS_SEARCH_STAT_task_focusing_begin_time_clock	Start time - Mid-Pro Group Algorithm stage									Statistics - Processing Times - Start&Stop Clock Times	Start time - Mid-Pro Group Algorithm stage
RESULTS_SEARCH_STAT_task_focusing_end_time_clock	End time - Mid-Pro Group Algorithm stage									Statistics - Processing Times - Start&Stop Clock Times	End time - Mid-Pro Group Algorithm stage
RESULTS_SEARCH_STAT_task_taglet_exe_begin_time_clock	Start time - Taglet Algorithm search stage									Statistics - Processing Times - Start&Stop Clock Times	Start time - Taglet Algorithm search stage
RESULTS_SEARCH_STAT_task_taglet_exe_end_time_clock	End time - Taglet Algorithm search stage									Statistics - Processing Times - Start&Stop Clock Times	End time - Taglet Algorithm search stage
RESULTS_SEARCH_STAT_task_progroup_begin_time_clock	Start time - Final Pro Group Algorithm stage		1		2019-06-19 14:57:50					Statistics - Processing Times - Start&Stop Clock Times	Start time - Final Pro Group Algorithm stage	2019-06-19 14:57:50
RESULTS_SEARCH_STAT_task_progroup_end_time_clock	End time - Final Pro Group Algorithm stage		1		2019-06-19 15:05:32					Statistics - Processing Times - Start&Stop Clock Times	End time - Final Pro Group Algorithm stage	2019-06-19 15:05:32
RESULTS_SEARCH_STAT_stage_fdr_begin_time_clock	Start time - FDR analysis stage		1		2019-06-19 15:05:33					Statistics - Processing Times - Start&Stop Clock Times	Start time - FDR analysis stage	2019-06-19 15:05:33
RESULTS_SEARCH_STAT_stage_fdr_end_time_clock	End time - FDR analysis stage		1		2019-06-19 15:06:26					Statistics - Processing Times - Start&Stop Clock Times	End time - FDR analysis stage	2019-06-19 15:06:26
RESULTS_SEARCH_STAT_search_time_duration	Clock Time Duration for Full Search (ms)		1		1006015		msec to min	1.66667e-05		Statistics - Processing Times - Duration in Real Clock Times	Clock time duration - Full search (min)	16.7669
RESULTS_SEARCH_STAT_stage_searching_time_duration	Clock Time Duration for Identification Algorithm Stages (ms)		1		903329		msec to min	1.66667e-05		Statistics - Processing Times - Duration in Real Clock Times	Clock time duration - Identification algorithm stages (min)	15.0555
RESULTS_SEARCH_STAT_stage_signal_processing_time_duration	Clock Time Duration for Waiting Stage (ms)		1		48179		msec to min	1.66667e-05		Statistics - Processing Times - Duration in Real Clock Times	Clock time duration - Signal processing stage (min)	0.802983
RESULTS_SEARCH_STAT_stage_waiting_time_duration	Clock Time Duration for Signal Processing Stage (ms)		1		279		msec to min	1.66667e-05		Statistics - Processing Times - Duration in Real Clock Times	Clock time duration - Waiting stage (min)	0.00465
RESULTS_SEARCH_STAT_task_fraglet_exe_time_duration	Clock Time Duration for Fraglet Algorithm Stage (ms)		1		436138		msec to min	1.66667e-05		Statistics - Processing Times - Duration in Real Clock Times	Clock time duration - Fraglet Algorithm stage (min)	7.26897
RESULTS_SEARCH_STAT_task_focusing_time_duration	Clock Time Duration for Mid-Pro Group Algorithm Stage (ms)						msec to min	1.66667e-05		Statistics - Processing Times - Duration in Real Clock Times	Clock time duration - Mid-Pro Group Algorithm stage (min)
RESULTS_SEARCH_STAT_task_taglet_exe_time_duration	Clock Time Duration for Taglet Algorithm Stage (ms)						msec to min	1.66667e-05		Statistics - Processing Times - Duration in Real Clock Times	Clock time duration - Taglet Algorithm stage (min)
RESULTS_SEARCH_STAT_task_progroup_time_duration	Clock Time Duration for Pro Group Algorithm Stage (ms)		1		462413		msec to min	1.66667e-05		Statistics - Processing Times - Duration in Real Clock Times	Clock time duration - Pro Group Algorithm stage (min)	7.70688
RESULTS_SEARCH_STAT_stage_fdr_time_duration	Clock Time Duration for FDR Analysis (ms)		1		53354		msec to min	1.66667e-05		Statistics - Processing Times - Duration in Real Clock Times	Clock time duration - FDR Analysis (min)	0.889233
				1						Statistics - Processing Times - Duration in Real Clock Times	Clock time not accounted for in measured stages	0.0942
	CPU Time Duration for Signal Processing Stage (ms)						msec to min	1.66667e-05		Statistics - Processing Times - Duration in CPU Time	CPU time duration - Signal Processing stage (min)
RESULTS_SEARCH_STAT_task_fraglet_exe_time_cpu	CPU Time Duration for Fraglet Algorithm Stage (ms)		1		868234		msec to min	1.66667e-05		Statistics - Processing Times - Duration in CPU Time	CPU time duration - Fraglet Algorithm stage (min)	14.4706
RESULTS_SEARCH_STAT_task_focusing_time_cpu	CPU Time Duration for Mid-Pro Group Algorithm Stage (ms)						msec to min	1.66667e-05		Statistics - Processing Times - Duration in CPU Time	CPU time duration - Mid-Pro Group Algorithm stage (min)
RESULTS_SEARCH_STAT_task_taglet_exe_time_cpu	CPU Time Duration for Taglet Algorithm Stage (ms)						msec to min	1.66667e-05		Statistics - Processing Times - Duration in CPU Time	CPU time duration - Taglet Algorithm stage (min)
RESULTS_SEARCH_STAT_task_progroup_time_cpu	CPU Time Duration for Pro Group Algorithm Stage (ms)		1		480000		msec to min	1.66667e-05		Statistics - Processing Times - Duration in CPU Time	CPU time duration - Pro Group Algorithm stage (min)	8
				1						Statistics - Processing Times - Percent by Stage	Percent of clock time - Identification Algorithm stages	0.897928
				1						Statistics - Processing Times - Percent by Stage	Percent of clock time - Signal Processing stage	0.0478909
				1						Statistics - Processing Times - Percent by Stage	Percent of clock time - Waiting stage	0.000277332
				1						Statistics - Processing Times - Percent by Stage	Percent of clock time - Fraglet Algorithm stage	0.43353
				1						Statistics - Processing Times - Percent by Stage	Percent of clock time - Mid-Pro Group Algorithm stage
				1						Statistics - Processing Times - Percent by Stage	Percent of clock time - Taglet Algorithm stage
				1						Statistics - Processing Times - Percent by Stage	Percent of clock time - Pro Group Algorithm stage	0.459648
				1						Statistics - Processing Times - Percent by Stage	Percent of clock time - FDR Analysis	0.053035
				1						Statistics - Processing Rate - Clock (Sec/Spectrum)	Clock time rate (sec/spect) - Full Search	0.023122
				1						Statistics - Processing Rate - Clock (Sec/Spectrum)	Clock time rate (sec/spect) - Identification Algorithm stages	0.0207619
				1						Statistics - Processing Rate - Clock (Sec/Spectrum)	Clock time rate (sec/spect) - Signal processing stage	0.00110733
				1						Statistics - Processing Rate - Clock (Sec/Spectrum)	Clock time rate (sec/spect) - Waiting stage	6.41247e-06
				1						Statistics - Processing Rate - Clock (Sec/Spectrum)	Clock time rate (sec/spect) - Fraglet Algorithm stage	0.0100241
				1						Statistics - Processing Rate - Clock (Sec/Spectrum)	Clock time rate (sec/spect) - Mid-Pro Group Algorithm stage
				1						Statistics - Processing Rate - Clock (Sec/Spectrum)	Clock time rate (sec/spect) - Taglet Algorithm stage
				1						Statistics - Processing Rate - Clock (Sec/Spectrum)	Clock time rate (sec/spect) - Pro Group Algorithm stage	0.010628
				1						Statistics - Processing Rate - Clock (Sec/Spectrum)	Clock time rate (sec/spect) - FDR Analysis	0.00122628
				1						Statistics - Processing Rate - CPU (Sec/Spectrum)	CPU time rate (sec/spect) - Signal processing stage
				1						Statistics - Processing Rate - CPU (Sec/Spectrum)	CPU time rate (sec/spect) - Fraglet Algorithm stage	0.0199553
				1						Statistics - Processing Rate - CPU (Sec/Spectrum)	CPU time rate (sec/spect) - Mid-Pro Group Algorithm stage
				1						Statistics - Processing Rate - CPU (Sec/Spectrum)	CPU time rate (sec/spect) - Taglet Algorithm stage
				1						Statistics - Processing Rate - CPU (Sec/Spectrum)	CPU time rate (sec/spect) - Pro Group Algorithm stage	0.0110322
				1						Statistics - Processing Rate - Clock (Sec/Spectrum/DB Protein)	Clock time rate (sec/spect/DB protein) - Full search	2.08856e-07
				1						Statistics - Processing Rate - Clock (Sec/Spectrum/DB Protein)	Clock time rate (sec/spect/DB protein) - Identification algorithm stages	1.87537e-07
				1						Statistics - Processing Rate - Clock (Sec/Spectrum/DB Protein)	Clock time rate (sec/spect/DB protein) - Signal processing stage	1.00023e-08
				1						Statistics - Processing Rate - Clock (Sec/Spectrum/DB Protein)	Clock time rate (sec/spect/DB protein) - Waiting stage	5.79223e-11
				1						Statistics - Processing Rate - Clock (Sec/Spectrum/DB Protein)	Clock time rate (sec/spect/DB protein) - Fraglet Algorithm stage	9.05453e-08
				1						Statistics - Processing Rate - Clock (Sec/Spectrum/DB Protein)	Clock time rate (sec/spect/DB protein) - Mid-Pro Group Algorithm stage
				1						Statistics - Processing Rate - Clock (Sec/Spectrum/DB Protein)	Clock time rate (sec/spect/DB protein) - Taglet Algorithm stage
				1						Statistics - Processing Rate - Clock (Sec/Spectrum/DB Protein)	Clock time rate (sec/spect/DB protein) - Pro Group Algorithm stage	9.60002e-08
				1						Statistics - Processing Rate - Clock (Sec/Spectrum/DB Protein)	Clock time rate (sec/spect/DB protein) - FDR Analysis	1.10767e-08
				1						Statistics - Processing Rate - CPU (Sec/Spectrum/DB Protein)	CPU time rate (sec/spect/DB protein) - Signal processing stage
				1						Statistics - Processing Rate - CPU (Sec/Spectrum/DB Protein)	CPU time rate (sec/spect/DB protein) - Fraglet Algorithm stage	1.80251e-07
				1						Statistics - Processing Rate - CPU (Sec/Spectrum/DB Protein)	CPU time rate (sec/spect/DB protein) - Mid-Pro Group Algorithm stage
				1						Statistics - Processing Rate - CPU (Sec/Spectrum/DB Protein)	CPU time rate (sec/spect/DB protein) - Taglet Algorithm stage
				1						Statistics - Processing Rate - CPU (Sec/Spectrum/DB Protein)	CPU time rate (sec/spect/DB protein) - Pro Group Algorithm stage	9.96513e-08
				1						Statistics - Extent of Distribution - Fundamental	Distribution factor - CPU vs. clock time - Signal processing stage
				1						Statistics - Extent of Distribution - Fundamental	Distribution factor - CPU vs. clock time - Fraglet Algorithm stage	1.99073
				1						Statistics - Extent of Distribution - Fundamental	Distribution factor - CPU vs. clock time - Mid-Pro Group Algorithm stage
				1						Statistics - Extent of Distribution - Fundamental	Distribution factor - CPU vs. clock time - Taglet Algorithm stage
				1						Statistics - Extent of Distribution - Fundamental	Distribution factor - CPU vs. clock time - Pro Group Algorithm stage	1.03803
				1						Statistics - Extent of Distribution - vs Segments	Ratio of distribution factor to number of search segments - Signal processing stage
				1						Statistics - Extent of Distribution - vs Segments	Ratio of distribution factor to number of search segments - Fraglet Algorithm stage	0.165894
				1						Statistics - Extent of Distribution - vs Segments	Ratio of distribution factor to number of search segments - Mid-Pro Group Algorithm stage
				1						Statistics - Extent of Distribution - vs Segments	Ratio of distribution factor to number of search segments - Taglet Algorithm stage
				1						Statistics - Extent of Distribution - vs Segments	Ratio of distribution factor to number of search segments - Pro Group Algorithm stage	0.0865028
				1						Statistics - Extent of Distribution - vs Licensed Cores	Ratio of distribution factor to number of licensed cores - Signal processing stage
				1						Statistics - Extent of Distribution - vs Licensed Cores	Ratio of distribution factor to number of licensed cores - Fraglet Algorithm stage	0.995366
				1						Statistics - Extent of Distribution - vs Licensed Cores	Ratio of distribution factor to number of licensed cores - Mid-Pro Group Algorithm stage
				1						Statistics - Extent of Distribution - vs Licensed Cores	Ratio of distribution factor to number of licensed cores - Taglet Algorithm stage
				1						Statistics - Extent of Distribution - vs Licensed Cores	Ratio of distribution factor to number of licensed cores - Pro Group Algorithm stage	0.519017
PARAMETERS_PEAKLIST_original_count	Average number of spectra per segment	1	1	1	3625.75					Statistics - Search Segmentation	Average number of spectra per segment	3625.75
PARAMETERS_PEAKLIST_original_count	Standard deviation of number of spectra per segment	1	1	1	52.2461					Statistics - Search Segmentation	Standard deviation of number of spectra per segment	52.2461
PARAMETERS_PEAKLIST_original_count	Maximum number of spectra per segment	1	1	1	3692					Statistics - Search Segmentation	Maximum number of spectra per segment	3692
PARAMETERS_PEAKLIST_original_count	Minimum number of spectra per segment	1	1	1	3538					Statistics - Search Segmentation	Minimum number of spectra per segment	3538
										Attributes - Input data filenames	Filename of Input File 1	C:\Data\Flores_Mirales\06202019\mus2\06172019_AFlor_Cath_2_A1.mgf
										Attributes - Input data filenames	Filename of Input File 2	C:\Data\Flores_Mirales\06202019\mus2\06172019_AFlor_Cath_2_A2.mgf
										Attributes - Input data filenames	Filename of Input File 3	C:\Data\Flores_Mirales\06202019\mus2\06172019_AFlor_Cath_2_A3.mgf
										Attributes - Input data filenames	Filename of Input File 4
										Attributes - Input data filenames	Filename of Input File 5
										Attributes - Input data filenames	Filename of Input File 6
										Attributes - Input data filenames	Filename of Input File 7
										Attributes - Input data filenames	Filename of Input File 8
										Attributes - Input data filenames	Filename of Input File 9
										Attributes - Input data filenames	Filename of Input File 10
										Attributes - Input data filenames	Filename of Input File 11
										Attributes - Input data filenames	Filename of Input File 12
										Attributes - Input data filenames	Filename of Input File 13
										Attributes - Input data filenames	Filename of Input File 14
										Attributes - Input data filenames	Filename of Input File 15
										Attributes - Input data filenames	Filename of Input File 16
										Attributes - Input data filenames	Filename of Input File 17
										Attributes - Input data filenames	Filename of Input File 18
										Attributes - Input data filenames	Filename of Input File 19
										Attributes - Input data filenames	Filename of Input File 20
										Attributes - Input data filenames	Filename of Input File 21
										Attributes - Input data filenames	Filename of Input File 22
										Attributes - Input data filenames	Filename of Input File 23
										Attributes - Input data filenames	Filename of Input File 24
										Attributes - Input data filenames	Filename of Input File 25
										Attributes - Input data filenames	Filename of Input File 26
										Attributes - Input data filenames	Filename of Input File 27
										Attributes - Input data filenames	Filename of Input File 28
										Attributes - Input data filenames	Filename of Input File 29
										Attributes - Input data filenames	Filename of Input File 30
										Attributes - Input data filenames	Filename of Input File 31
										Attributes - Input data filenames	Filename of Input File 32
										Attributes - Input data filenames	Filename of Input File 33
										Attributes - Input data filenames	Filename of Input File 34
										Attributes - Input data filenames	Filename of Input File 35
										Attributes - Input data filenames	Filename of Input File 36
										Attributes - Input data filenames	Filename of Input File 37
										Attributes - Input data filenames	Filename of Input File 38
										Attributes - Input data filenames	Filename of Input File 39
										Attributes - Input data filenames	Filename of Input File 40
										Attributes - Input data filenames	Filename of Input File 41
										Attributes - Input data filenames	Filename of Input File 42
										Attributes - Input data filenames	Filename of Input File 43
										Attributes - Input data filenames	Filename of Input File 44
										Attributes - Input data filenames	Filename of Input File 45
										Attributes - Input data filenames	Filename of Input File 46
										Attributes - Input data filenames	Filename of Input File 47
										Attributes - Input data filenames	Filename of Input File 48
										Attributes - Input data filenames	Filename of Input File 49
										Attributes - Input data filenames	Filename of Input File 50
										Attributes - Input data filenames	Filename of Input File 51
										Attributes - Input data filenames	Filename of Input File 52
										Attributes - Input data filenames	Filename of Input File 53
										Attributes - Input data filenames	Filename of Input File 54
										Attributes - Input data filenames	Filename of Input File 55
										Attributes - Input data filenames	Filename of Input File 56
										Attributes - Input data filenames	Filename of Input File 57
										Attributes - Input data filenames	Filename of Input File 58
										Attributes - Input data filenames	Filename of Input File 59
										Attributes - Input data filenames	Filename of Input File 60
										Attributes - Input data filenames	Filename of Input File 61
										Attributes - Input data filenames	Filename of Input File 62
										Attributes - Input data filenames	Filename of Input File 63
										Attributes - Input data filenames	Filename of Input File 64
										Attributes - Input data filenames	Filename of Input File 65
										Attributes - Input data filenames	Filename of Input File 66
										Attributes - Input data filenames	Filename of Input File 67
										Attributes - Input data filenames	Filename of Input File 68
										Attributes - Input data filenames	Filename of Input File 69
										Attributes - Input data filenames	Filename of Input File 70
										Attributes - Input data filenames	Filename of Input File 71
										Attributes - Input data filenames	Filename of Input File 72
										Attributes - Input data filenames	Filename of Input File 73
										Attributes - Input data filenames	Filename of Input File 74
										Attributes - Input data filenames	Filename of Input File 75
										Attributes - Input data filenames	Filename of Input File 76
										Attributes - Input data filenames	Filename of Input File 77
										Attributes - Input data filenames	Filename of Input File 78
										Attributes - Input data filenames	Filename of Input File 79
										Attributes - Input data filenames	Filename of Input File 80
										Attributes - Input data filenames	Filename of Input File 81
										Attributes - Input data filenames	Filename of Input File 82
										Attributes - Input data filenames	Filename of Input File 83
										Attributes - Input data filenames	Filename of Input File 84
										Attributes - Input data filenames	Filename of Input File 85
										Attributes - Input data filenames	Filename of Input File 86
										Attributes - Input data filenames	Filename of Input File 87
										Attributes - Input data filenames	Filename of Input File 88
										Attributes - Input data filenames	Filename of Input File 89
										Attributes - Input data filenames	Filename of Input File 90
										Attributes - Input data filenames	Filename of Input File 91
										Attributes - Input data filenames	Filename of Input File 92
										Attributes - Input data filenames	Filename of Input File 93
										Attributes - Input data filenames	Filename of Input File 94
										Attributes - Input data filenames	Filename of Input File 95
										Attributes - Input data filenames	Filename of Input File 96
										Attributes - Input data filenames	Filename of Input File 97
										Attributes - Input data filenames	Filename of Input File 98
										Attributes - Input data filenames	Filename of Input File 99
										Attributes - Input data filenames	Filename of Input File 100
										Attributes - Input data filenames	Filename of Input File 101
										Attributes - Input data filenames	Filename of Input File 102
										Attributes - Input data filenames	Filename of Input File 103
										Attributes - Input data filenames	Filename of Input File 104
										Attributes - Input data filenames	Filename of Input File 105
										Attributes - Input data filenames	Filename of Input File 106
										Attributes - Input data filenames	Filename of Input File 107
										Attributes - Input data filenames	Filename of Input File 108
										Attributes - Input data filenames	Filename of Input File 109
										Attributes - Input data filenames	Filename of Input File 110
										Attributes - Input data filenames	Filename of Input File 111
										Attributes - Input data filenames	Filename of Input File 112
										Attributes - Input data filenames	Filename of Input File 113
										Attributes - Input data filenames	Filename of Input File 114
										Attributes - Input data filenames	Filename of Input File 115
										Attributes - Input data filenames	Filename of Input File 116
										Attributes - Input data filenames	Filename of Input File 117
										Attributes - Input data filenames	Filename of Input File 118
										Attributes - Input data filenames	Filename of Input File 119
										Attributes - Input data filenames	Filename of Input File 120
										Attributes - Input data filenames	Filename of Input File 121
										Attributes - Input data filenames	Filename of Input File 122
										Attributes - Input data filenames	Filename of Input File 123
										Attributes - Input data filenames	Filename of Input File 124
										Attributes - Input data filenames	Filename of Input File 125
										Attributes - Input data filenames	Filename of Input File 126
										Attributes - Input data filenames	Filename of Input File 127
										Attributes - Input data filenames	Filename of Input File 128
										Attributes - Input data filenames	Filename of Input File 129
										Attributes - Input data filenames	Filename of Input File 130
										Attributes - Input data filenames	Filename of Input File 131
										Attributes - Input data filenames	Filename of Input File 132
										Attributes - Input data filenames	Filename of Input File 133
										Attributes - Input data filenames	Filename of Input File 134
										Attributes - Input data filenames	Filename of Input File 135
										Attributes - Input data filenames	Filename of Input File 136
										Attributes - Input data filenames	Filename of Input File 137
										Attributes - Input data filenames	Filename of Input File 138
										Attributes - Input data filenames	Filename of Input File 139
										Attributes - Input data filenames	Filename of Input File 140
										Attributes - Input data filenames	Filename of Input File 141
										Attributes - Input data filenames	Filename of Input File 142
										Attributes - Input data filenames	Filename of Input File 143
										Attributes - Input data filenames	Filename of Input File 144
										Attributes - Input data filenames	Filename of Input File 145
										Attributes - Input data filenames	Filename of Input File 146
										Attributes - Input data filenames	Filename of Input File 147
										Attributes - Input data filenames	Filename of Input File 148
										Attributes - Input data filenames	Filename of Input File 149
										Attributes - Input data filenames	Filename of Input File 150
										Attributes - Input data filenames	Filename of Input File 151
										Attributes - Input data filenames	Filename of Input File 152
										Attributes - Input data filenames	Filename of Input File 153
										Attributes - Input data filenames	Filename of Input File 154
										Attributes - Input data filenames	Filename of Input File 155
										Attributes - Input data filenames	Filename of Input File 156
										Attributes - Input data filenames	Filename of Input File 157
										Attributes - Input data filenames	Filename of Input File 158
										Attributes - Input data filenames	Filename of Input File 159
										Attributes - Input data filenames	Filename of Input File 160
										Attributes - Input data filenames	Filename of Input File 161
										Attributes - Input data filenames	Filename of Input File 162
										Attributes - Input data filenames	Filename of Input File 163
										Attributes - Input data filenames	Filename of Input File 164
										Attributes - Input data filenames	Filename of Input File 165
										Attributes - Input data filenames	Filename of Input File 166
										Attributes - Input data filenames	Filename of Input File 167
										Attributes - Input data filenames	Filename of Input File 168
										Attributes - Input data filenames	Filename of Input File 169
										Attributes - Input data filenames	Filename of Input File 170
										Attributes - Input data filenames	Filename of Input File 171
										Attributes - Input data filenames	Filename of Input File 172
										Attributes - Input data filenames	Filename of Input File 173
										Attributes - Input data filenames	Filename of Input File 174
										Attributes - Input data filenames	Filename of Input File 175
										Attributes - Input data filenames	Filename of Input File 176
										Attributes - Input data filenames	Filename of Input File 177
										Attributes - Input data filenames	Filename of Input File 178
										Attributes - Input data filenames	Filename of Input File 179
										Attributes - Input data filenames	Filename of Input File 180
										Attributes - Input data filenames	Filename of Input File 181
										Attributes - Input data filenames	Filename of Input File 182
										Attributes - Input data filenames	Filename of Input File 183
										Attributes - Input data filenames	Filename of Input File 184
										Attributes - Input data filenames	Filename of Input File 185
										Attributes - Input data filenames	Filename of Input File 186
										Attributes - Input data filenames	Filename of Input File 187
										Attributes - Input data filenames	Filename of Input File 188
										Attributes - Input data filenames	Filename of Input File 189
										Attributes - Input data filenames	Filename of Input File 190
										Attributes - Input data filenames	Filename of Input File 191
										Attributes - Input data filenames	Filename of Input File 192
										Attributes - Input data filenames	Filename of Input File 193
										Attributes - Input data filenames	Filename of Input File 194
										Attributes - Input data filenames	Filename of Input File 195
										Attributes - Input data filenames	Filename of Input File 196
										Attributes - Input data filenames	Filename of Input File 197
										Attributes - Input data filenames	Filename of Input File 198
										Attributes - Input data filenames	Filename of Input File 199
										Attributes - Input data filenames	Filename of Input File 200

## Sheet: Protein Level Data
Protein Level Data	Unused ProtScore Threshold	Confidence Threshold	Forward	Reverse	Correct	Incorrect	Total	Global FDR	q-value	Fit Unused ProtScore Threshold	Fit Confidence Threshold	Fit Forward	Fit Reverse	Fit Correct	Fit Incorrect	Fit Total	Fit Global FDR	Fit Local FDR
	194.43	1	1	0	1	0	1	0	0	194.43	1	0.999997	2.66907e-06	0.999995	5.33815e-06	1	5.33815e-06	5.33825e-06
	171.34	1	2	0	2	0	2	0	0	171.34	1	1.99999	5.33825e-06	1.99999	1.06765e-05	2	5.33825e-06	5.33835e-06
	126.02	1	3	0	3	0	3	0	0	126.02	1	2.99999	8.00753e-06	2.99998	1.60151e-05	3	5.33835e-06	5.33856e-06
	102.27	1	4	0	4	0	4	0	0	102.27	1	3.99999	1.06769e-05	3.99998	2.13538e-05	4	5.33846e-06	5.33877e-06
	94.42	1	5	0	5	0	5	0	0	94.42	1	4.99999	1.33464e-05	4.99997	2.66928e-05	5	5.33856e-06	5.33898e-06
	85.1	1	6	0	6	0	6	0	0	85.1	1	5.99998	1.6016e-05	5.99997	3.2032e-05	6	5.33867e-06	5.33918e-06
	82.68	1	7	0	7	0	7	0	0	82.68	1	6.99998	1.86857e-05	6.99996	3.73714e-05	7	5.33877e-06	5.33939e-06
	80.64	1	8	0	8	0	8	0	0	80.64	1	7.99998	2.13555e-05	7.99996	4.2711e-05	8	5.33887e-06	5.3396e-06
	80.14	1	9	0	9	0	9	0	0	80.14	1	8.99998	2.40254e-05	8.99995	4.80508e-05	9	5.33898e-06	5.33981e-06
	78.1	1	10	0	10	0	10	0	0	78.1	1	9.99997	2.66954e-05	9.99995	5.33908e-05	10	5.33908e-06	5.34002e-06
	64.21	1	11	0	11	0	11	0	0	64.21	1	11	2.93655e-05	10.9999	5.8731e-05	11	5.33918e-06	5.34022e-06
	62.56	1	12	0	12	0	12	0	0	62.56	1	12	3.20357e-05	11.9999	6.40715e-05	12	5.33929e-06	5.34043e-06
	56.73	1	13	0	13	0	13	0	0	56.73	1	13	3.47061e-05	12.9999	6.94121e-05	13	5.33939e-06	5.34064e-06
	56.6	1	14	0	14	0	14	0	0	56.6	1	14	3.73765e-05	13.9999	7.4753e-05	14	5.3395e-06	5.34085e-06
	53.86	1	15	0	15	0	15	0	0	53.86	1	15	4.0047e-05	14.9999	8.0094e-05	15	5.3396e-06	5.34106e-06
	53.78	1	16	0	16	0	16	0	0	53.78	1	16	4.27176e-05	15.9999	8.54353e-05	16	5.3397e-06	5.34126e-06
	53.16	1	17	0	17	0	17	0	0	53.16	1	17	4.53884e-05	16.9999	9.07767e-05	17	5.33981e-06	5.34147e-06
	52.44	1	18	0	18	0	18	0	0	52.44	1	18	4.80592e-05	17.9999	9.61184e-05	18	5.33991e-06	5.34168e-06
	51.85	1	19	0	19	0	19	0	0	51.85	1	18.9999	5.07302e-05	18.9999	0.00010146	19	5.34002e-06	5.34189e-06
	51.59	1	20	0	20	0	20	0	0	51.59	1	19.9999	5.34012e-05	19.9999	0.000106802	20	5.34012e-06	5.3421e-06
	50.95	1	21	0	21	0	21	0	0	50.95	1	20.9999	5.60724e-05	20.9999	0.000112145	21	5.34022e-06	5.3423e-06
	50.49	1	22	0	22	0	22	0	0	50.49	1	21.9999	5.87436e-05	21.9999	0.000117487	22	5.34033e-06	5.34251e-06
	48.41	1	23	0	23	0	23	0	0	48.41	1	22.9999	6.1415e-05	22.9999	0.00012283	23	5.34043e-06	5.34272e-06
	48.26	1	24	0	24	0	24	0	0	48.26	1	23.9999	6.40864e-05	23.9999	0.000128173	24	5.34054e-06	5.34293e-06
	47.6	1	25	0	25	0	25	0	0	47.6	1	24.9999	6.6758e-05	24.9999	0.000133516	25	5.34064e-06	5.34314e-06
	45.42	1	26	0	26	0	26	0	0	45.42	1	25.9999	6.94297e-05	25.9999	0.000138859	26	5.34074e-06	5.34334e-06
	44.48	1	27	0	27	0	27	0	0	44.48	1	26.9999	7.21014e-05	26.9999	0.000144203	27	5.34085e-06	5.34355e-06
	43.07	1	28	0	28	0	28	0	0	43.07	1	27.9999	7.47733e-05	27.9999	0.000149547	28	5.34095e-06	5.34376e-06
	41.78	1	29	0	29	0	29	0	0	41.78	1	28.9999	7.74453e-05	28.9998	0.000154891	29	5.34106e-06	5.34397e-06
	41.71	1	30	0	30	0	30	0	0	41.71	1	29.9999	8.01174e-05	29.9998	0.000160235	30	5.34116e-06	5.34418e-06
	40.14	1	31	0	31	0	31	0	0	40.14	1	30.9999	8.27896e-05	30.9998	0.000165579	31	5.34126e-06	5.34438e-06
	39.72	1	32	0	32	0	32	0	0	39.72	1	31.9999	8.54619e-05	31.9998	0.000170924	32	5.34137e-06	5.34459e-06
	39.38	1	33	0	33	0	33	0	0	39.38	1	32.9999	8.81343e-05	32.9998	0.000176269	33	5.34147e-06	5.3448e-06
	38.65	1	34	0	34	0	34	0	0	38.65	1	33.9999	9.08068e-05	33.9998	0.000181614	34	5.34158e-06	5.34501e-06
	37.3	1	35	0	35	0	35	0	0	37.3	1	34.9999	9.34794e-05	34.9998	0.000186959	35	5.34168e-06	5.34522e-06
	37.25	1	36	0	36	0	36	0	0	37.25	1	35.9999	9.61521e-05	35.9998	0.000192304	36	5.34178e-06	5.34542e-06
	35.67	1	37	0	37	0	37	0	0	35.67	1	36.9999	9.88249e-05	36.9998	0.00019765	37	5.34189e-06	5.34563e-06
	32.52	1	38	0	38	0	38	0	0	32.52	1	37.9999	0.000101498	37.9998	0.000202996	38	5.34199e-06	5.34584e-06
	32.05	1	39	0	39	0	39	0	0	32.05	1	38.9999	0.000104171	38.9998	0.000208342	39	5.3421e-06	5.34605e-06
	31.82	1	40	0	40	0	40	0	0	31.82	1	39.9999	0.000106844	39.9998	0.000213688	40	5.3422e-06	5.34626e-06
	31.53	1	41	0	41	0	41	0	0	31.53	1	40.9999	0.000109517	40.9998	0.000219034	41	5.3423e-06	5.34646e-06
	31.02	1	42	0	42	0	42	0	0	31.02	1	41.9999	0.000112191	41.9998	0.000224381	42	5.34241e-06	5.34667e-06
	30.61	1	43	0	43	0	43	0	0	30.61	1	42.9999	0.000114864	42.9998	0.000229728	43	5.34251e-06	5.34688e-06
	30.5	1	44	0	44	0	44	0	0	30.5	1	43.9999	0.000117538	43.9998	0.000235075	44	5.34262e-06	5.34709e-06
	30.18	1	45	0	45	0	45	0	0	30.18	1	44.9999	0.000120211	44.9998	0.000240422	45	5.34272e-06	5.3473e-06
	30.02	1	46	0	46	0	46	0	0	30.02	1	45.9999	0.000122885	45.9998	0.00024577	46	5.34282e-06	5.34751e-06
	29.66	1	47	0	47	0	47	0	0	29.66	1	46.9999	0.000125559	46.9997	0.000251118	47	5.34293e-06	5.34771e-06
	29.58	1	48	0	48	0	48	0	0	29.58	1	47.9999	0.000128233	47.9997	0.000256466	48	5.34303e-06	5.34792e-06
	29.32	1	49	0	49	0	49	0	0	29.32	1	48.9999	0.000130907	48.9997	0.000261814	49	5.34314e-06	5.34813e-06
	28.26	1	50	0	50	0	50	0	0	28.26	1	49.9999	0.000133581	49.9997	0.000267162	50	5.34324e-06	5.34834e-06
	27.75	1	51	0	51	0	51	0	0	27.75	1	50.9999	0.000136255	50.9997	0.000272511	51	5.34334e-06	5.34855e-06
	27.18	1	52	0	52	0	52	0	0	27.18	1	51.9999	0.00013893	51.9997	0.000277859	52	5.34345e-06	5.34875e-06
	27.17	1	53	0	53	0	53	0	0	27.17	1	52.9999	0.000141604	52.9997	0.000283208	53	5.34355e-06	5.34896e-06
	26.76	1	54	0	54	0	54	0	0	26.76	1	53.9999	0.000144279	53.9997	0.000288557	54	5.34366e-06	5.34917e-06
	26.36	1	55	0	55	0	55	0	0	26.36	1	54.9999	0.000146953	54.9997	0.000293907	55	5.34376e-06	5.34938e-06
	25.88	1	56	0	56	0	56	0	0	25.88	1	55.9999	0.000149628	55.9997	0.000299256	56	5.34386e-06	5.34959e-06
	25.83	1	57	0	57	0	57	0	0	25.83	1	56.9998	0.000152303	56.9997	0.000304606	57	5.34397e-06	5.3498e-06
	25.82	1	58	0	58	0	58	0	0	25.82	1	57.9998	0.000154978	57.9997	0.000309956	58	5.34407e-06	5.35e-06
	25.32	1	59	0	59	0	59	0	0	25.32	1	58.9998	0.000157653	58.9997	0.000315306	59	5.34418e-06	5.35021e-06
	24.26	1	60	0	60	0	60	0	0	24.26	1	59.9998	0.000160328	59.9997	0.000320657	60	5.34428e-06	5.35042e-06
	24.04	1	61	0	61	0	61	0	0	24.04	1	60.9998	0.000163004	60.9997	0.000326007	61	5.34438e-06	5.35063e-06
	23.64	1	62	0	62	0	62	0	0	23.64	1	61.9998	0.000165679	61.9997	0.000331358	62	5.34449e-06	5.35084e-06
	23.49	1	63	0	63	0	63	0	0	23.49	1	62.9998	0.000168355	62.9997	0.000336709	63	5.34459e-06	5.35105e-06
	22.78	1	64	0	64	0	64	0	0	22.78	1	63.9998	0.00017103	63.9997	0.000342061	64	5.3447e-06	5.35125e-06
	22.5	1	65	0	65	0	65	0	0	22.5	1	64.9998	0.000173706	64.9997	0.000347412	65	5.3448e-06	5.35146e-06
	22	1	67	0	67	0	67	0	0	22	1	65.9998	0.000176382	65.9996	0.000352764	66	5.34491e-06	5.35177e-06
	21.39	1	68	0	68	0	68	0	0	22	1	66.9998	0.000179058	66.9996	0.000358116	67	5.34501e-06	5.35177e-06
	21.31	1	69	0	69	0	69	0	0	21.39	1	67.9998	0.000181734	67.9996	0.000363468	68	5.34511e-06	5.35209e-06
	21.21	1	70	0	70	0	70	0	0	21.31	1	68.9998	0.00018441	68.9996	0.00036882	69	5.34522e-06	5.3523e-06
	21.2	1	71	0	71	0	71	0	0	21.21	1	69.9998	0.000187086	69.9996	0.000374173	70	5.34532e-06	5.3525e-06
	21.03	1	72	0	72	0	72	0	0	21.2	1	70.9998	0.000189763	70.9996	0.000379525	71	5.34543e-06	5.35271e-06
	20.52	1	73	0	73	0	73	0	0	21.03	1	71.9998	0.000192439	71.9996	0.000384878	72	5.34553e-06	5.35292e-06
	20.16	1	74	0	74	0	74	0	0	20.52	1	72.9998	0.000195116	72.9996	0.000390231	73	5.34563e-06	5.35313e-06
	20.11	1	75	0	75	0	75	0	0	20.16	1	73.9998	0.000197792	73.9996	0.000395585	74	5.34574e-06	5.35334e-06
	20.1	1	76	0	76	0	76	0	0	20.11	1	74.9998	0.000200469	74.9996	0.000400938	75	5.34584e-06	5.35355e-06
	19.8	1	77	0	77	0	77	0	0	20.1	1	75.9998	0.000203146	75.9996	0.000406292	76	5.34595e-06	5.35375e-06
	19.57	1	78	0	78	0	78	0	0	19.8	1	76.9998	0.000205823	76.9996	0.000411646	77	5.34605e-06	5.35396e-06
	19.06	1	79	0	79	0	79	0	0	19.57	1	77.9998	0.0002085	77.9996	0.000417	78	5.34615e-06	5.35417e-06
	18.98	1	80	0	80	0	80	0	0	19.06	1	78.9998	0.000211177	78.9996	0.000422354	79	5.34626e-06	5.35438e-06
	18.89	1	81	0	81	0	81	0	0	18.98	1	79.9998	0.000213855	79.9996	0.000427709	80	5.34636e-06	5.35459e-06
	18.49	1	82	0	82	0	82	0	0	18.89	1	80.9998	0.000216532	80.9996	0.000433064	81	5.34647e-06	5.3548e-06
	18.28	1	83	0	83	0	83	0	0	18.49	1	81.9998	0.000219209	81.9996	0.000438419	82	5.34657e-06	5.355e-06
	18.04	1	84	0	84	0	84	0	0	18.28	1	82.9998	0.000221887	82.9996	0.000443774	83	5.34667e-06	5.35521e-06
	18	1	85	0	85	0	85	0	0	18.04	1	83.9998	0.000224565	83.9996	0.000449129	84	5.34678e-06	5.35542e-06
	17.99	1	86	0	86	0	86	0	0	18	1	84.9998	0.000227243	84.9995	0.000454485	85	5.34688e-06	5.35563e-06
	17.89	1	87	0	87	0	87	0	0	17.99	1	85.9998	0.00022992	85.9995	0.000459841	86	5.34699e-06	5.35584e-06
	17.68	1	88	0	88	0	88	0	0	17.89	1	86.9998	0.000232598	86.9995	0.000465197	87	5.34709e-06	5.35605e-06
	17.62	1	89	0	89	0	89	0	0	17.68	1	87.9998	0.000235277	87.9995	0.000470553	88	5.3472e-06	5.35626e-06
	17.47	1	90	0	90	0	90	0	0	17.62	1	88.9998	0.000237955	88.9995	0.00047591	89	5.3473e-06	5.35646e-06
	17.44	1	91	0	91	0	91	0	0	17.47	1	89.9998	0.000240633	89.9995	0.000481266	90	5.3474e-06	5.35667e-06
	17.25	1	92	0	92	0	92	0	0	17.44	1	90.9998	0.000243312	90.9995	0.000486623	91	5.34751e-06	5.35688e-06
	17.07	1	93	0	93	0	93	0	0	17.25	1	91.9998	0.00024599	91.9995	0.00049198	92	5.34761e-06	5.35709e-06
	17.02	1	94	0	94	0	94	0	0	17.07	1	92.9998	0.000248669	92.9995	0.000497338	93	5.34772e-06	5.3573e-06
	16.5	1	95	0	95	0	95	0	0	17.02	1	93.9997	0.000251348	93.9995	0.000502695	94	5.34782e-06	5.35751e-06
	16.1	1	96	0	96	0	96	0	0	16.5	1	94.9997	0.000254026	94.9995	0.000508053	95	5.34792e-06	5.35772e-06
	16.01	1	97	0	97	0	97	0	0	16.1	1	95.9997	0.000256705	95.9995	0.000513411	96	5.34803e-06	5.35792e-06
	15.83	1	98	0	98	0	98	0	0	16.01	1	96.9997	0.000259384	96.9995	0.000518769	97	5.34813e-06	5.35813e-06
	15.82	1	99	0	99	0	99	0	0	15.83	1	97.9997	0.000262064	97.9995	0.000524127	98	5.34824e-06	5.35834e-06
	15.64	1	100	0	100	0	100	0	0	15.82	1	98.9997	0.000264743	98.9995	0.000529486	99	5.34834e-06	5.35855e-06
	15.46	1	101	0	101	0	101	0	0	15.64	1	99.9997	0.000267422	99.9995	0.000534845	100	5.34845e-06	5.35876e-06
	15.43	1	102	0	102	0	102	0	0	15.46	1	101	0.000270102	100.999	0.000540204	101	5.34855e-06	5.35897e-06
	15.16	1	103	0	103	0	103	0	0	15.43	1	102	0.000272781	101.999	0.000545563	102	5.34865e-06	5.35918e-06
	14.94	1	104	0	104	0	104	0	0	15.16	1	103	0.000275461	102.999	0.000550922	103	5.34876e-06	5.35938e-06
	14.77	1	105	0	105	0	105	0	0	14.94	1	104	0.000278141	103.999	0.000556282	104	5.34886e-06	5.35959e-06
	14.63	1	106	0	106	0	106	0	0	14.77	1	105	0.000280821	104.999	0.000561641	105	5.34897e-06	5.3598e-06
	14.6	1	107	0	107	0	107	0	0	14.63	1	106	0.000283501	105.999	0.000567001	106	5.34907e-06	5.36001e-06
	14.29	1	108	0	108	0	108	0	0	14.6	1	107	0.000286181	106.999	0.000572362	107	5.34917e-06	5.36022e-06
	14.26	1	109	0	109	0	109	0	0	14.29	1	108	0.000288861	107.999	0.000577722	108	5.34928e-06	5.36043e-06
	14.18	1	110	0	110	0	110	0	0	14.26	1	109	0.000291541	108.999	0.000583083	109	5.34938e-06	5.36064e-06
	14.17	1	111	0	111	0	111	0	0	14.18	1	110	0.000294222	109.999	0.000588444	110	5.34949e-06	5.36084e-06
	14.15	1	112	0	112	0	112	0	0	14.17	1	111	0.000296902	110.999	0.000593805	111	5.34959e-06	5.36105e-06
	14.13	1	113	0	113	0	113	0	0	14.15	1	112	0.000299583	111.999	0.000599166	112	5.3497e-06	5.36126e-06
	14.05	1	114	0	114	0	114	0	0	14.13	1	113	0.000302264	112.999	0.000604527	113	5.3498e-06	5.36147e-06
	14	1	116	0	116	0	116	0	0	14.05	1	114	0.000304945	113.999	0.000609889	114	5.3499e-06	5.36168e-06
	13.84	1	117	0	117	0	117	0	0	14	1	115	0.000307625	114.999	0.000615251	115	5.35001e-06	5.36199e-06
	13.81	1	118	0	118	0	118	0	0	14	1	116	0.000310307	115.999	0.000620613	116	5.35011e-06	5.36199e-06
	13.75	1	119	0	119	0	119	0	0	13.84	1	117	0.000312988	116.999	0.000625975	117	5.35022e-06	5.36231e-06
	13.58	1	120	0	120	0	120	0	0	13.81	1	118	0.000315669	117.999	0.000631338	118	5.35032e-06	5.36251e-06
	13.55	1	121	0	121	0	121	0	0	13.75	1	119	0.00031835	118.999	0.000636701	119	5.35043e-06	5.36272e-06
	13.39	1	122	0	122	0	122	0	0	13.58	1	120	0.000321032	119.999	0.000642064	120	5.35053e-06	5.36293e-06
	13.15	1	123	0	123	0	123	0	0	13.55	1	121	0.000323713	120.999	0.000647427	121	5.35063e-06	5.36314e-06
	12.72	1	124	0	124	0	124	0	0	13.39	1	122	0.000326395	121.999	0.00065279	122	5.35074e-06	5.36335e-06
	12.7	1	125	0	125	0	125	0	0	13.15	1	123	0.000329077	122.999	0.000658154	123	5.35084e-06	5.36356e-06
	12.55	1	126	0	126	0	126	0	0	12.72	1	124	0.000331759	123.999	0.000663517	124	5.35095e-06	5.36377e-06
	12.28	1	127	0	127	0	127	0	0	12.7	1	125	0.000334441	124.999	0.000668881	125	5.35105e-06	5.36398e-06
	12	1	128	0	128	0	128	0	0	12.55	1	126	0.000337123	125.999	0.000674245	126	5.35115e-06	5.36418e-06
	11.61	1	129	0	129	0	129	0	0	12.28	1	127	0.000339805	126.999	0.00067961	127	5.35126e-06	5.36439e-06
	11.55	1	130	0	130	0	130	0	0	12	1	128	0.000342487	127.999	0.000684974	128	5.35136e-06	5.3646e-06
	11.4	1	131	0	131	0	131	0	0	11.61	1	129	0.00034517	128.999	0.000690339	129	5.35147e-06	5.36481e-06
	11.23	1	132	0	132	0	132	0	0	11.55	1	130	0.000347852	129.999	0.000695704	130	5.35157e-06	5.36502e-06
	11.17	1	133	0	133	0	133	0	0	11.4	1	131	0.000350535	130.999	0.00070107	131	5.35168e-06	5.36523e-06
	11.16	1	134	0	134	0	134	0	0	11.23	1	132	0.000353217	131.999	0.000706435	132	5.35178e-06	5.36544e-06
	11.07	1	135	0	135	0	135	0	0	11.17	1	133	0.0003559	132.999	0.000711801	133	5.35188e-06	5.36565e-06
	10.94	1	136	0	136	0	136	0	0	11.16	1	134	0.000358583	133.999	0.000717166	134	5.35199e-06	5.36585e-06
	10.82	1	137	0	137	0	137	0	0	11.07	1	135	0.000361266	134.999	0.000722533	135	5.35209e-06	5.36606e-06
	10.8	1	138	0	138	0	138	0	0	10.94	1	136	0.000363949	135.999	0.000727899	136	5.3522e-06	5.36627e-06
	10.58	1	139	0	139	0	139	0	0	10.82	1	137	0.000366633	136.999	0.000733265	137	5.3523e-06	5.36648e-06
	10.5	1	140	0	140	0	140	0	0	10.8	1	138	0.000369316	137.999	0.000738632	138	5.35241e-06	5.36669e-06
	10.39	1	141	0	141	0	141	0	0	10.58	1	139	0.000371999	138.999	0.000743999	139	5.35251e-06	5.3669e-06
	10.29	1	142	0	142	0	142	0	0	10.5	1	140	0.000374683	139.999	0.000749366	140	5.35261e-06	5.36711e-06
	10.28	1	143	0	143	0	143	0	0	10.39	1	141	0.000377367	140.999	0.000754733	141	5.35272e-06	5.36732e-06
	10.25	1	144	0	144	0	144	0	0	10.29	1	142	0.00038005	141.999	0.000760101	142	5.35282e-06	5.36753e-06
	10.22	1	145	0	145	0	145	0	0	10.28	1	143	0.000382734	142.999	0.000765469	143	5.35293e-06	5.36774e-06
	10.18	1	146	0	146	0	146	0	0	10.25	1	144	0.000385418	143.999	0.000770837	144	5.35303e-06	5.36794e-06
	10.03	1	147	0	147	0	147	0	0	10.22	1	145	0.000388102	144.999	0.000776205	145	5.35314e-06	5.36815e-06
	10.02	1	148	0	148	0	148	0	0	10.18	1	146	0.000390787	145.999	0.000781573	146	5.35324e-06	5.36836e-06
	10	1	153	0	153	0	153	0	0	10.03	1	147	0.000393471	146.999	0.000786942	147	5.35334e-06	5.36857e-06
	9.9	1	154	0	154	0	154	0	0	10.02	1	148	0.000396155	147.999	0.00079231	148	5.35345e-06	5.36878e-06
	9.88	1	155	0	155	0	155	0	0	10	1	149	0.00039884	148.999	0.000797679	149	5.35355e-06	5.36941e-06
	9.8	1	156	0	156	0	156	0	0	10	1	150	0.000401524	149.999	0.000803049	150	5.35366e-06	5.36941e-06
	9.66	1	157	0	157	0	157	0	0	10	1	151	0.000404209	150.999	0.000808418	151	5.35376e-06	5.36941e-06
	9.34	1	158	0	158	0	158	0	0	10	1	152	0.000406894	151.999	0.000813788	152	5.35387e-06	5.36941e-06
	9.33	1	159	0	159	0	159	0	0	10	1	153	0.000409579	152.999	0.000819157	153	5.35397e-06	5.36941e-06
	9.31	1	160	0	160	0	160	0	0	9.9	1	154	0.000412264	153.999	0.000824527	154	5.35407e-06	5.37003e-06
	9.06	1	161	0	161	0	161	0	0	9.88	1	155	0.000414949	154.999	0.000829898	155	5.35418e-06	5.37024e-06
	9.05	1	162	0	162	0	162	0	0	9.8	1	156	0.000417634	155.999	0.000835268	156	5.35428e-06	5.37045e-06
	8.87	1	163	0	163	0	163	0	0	9.66	1	157	0.000420319	156.999	0.000840639	157	5.35439e-06	5.37066e-06
	8.8	1	164	0	164	0	164	0	0	9.34	1	158	0.000423005	157.999	0.00084601	158	5.35449e-06	5.37087e-06
	8.64	1	165	0	165	0	165	0	0	9.33	1	159	0.00042569	158.999	0.000851381	159	5.3546e-06	5.37108e-06
	8.32	1	166	0	166	0	166	0	0	9.31	1	160	0.000428376	159.999	0.000856752	160	5.3547e-06	5.37129e-06
	8.18	1	167	0	167	0	167	0	0	9.06	1	161	0.000431062	160.999	0.000862124	161	5.3548e-06	5.3715e-06
	8.14	1	168	0	168	0	168	0	0	9.05	1	162	0.000433748	161.999	0.000867495	162	5.35491e-06	5.37171e-06
	8	1	172	0	172	0	172	0	0	8.87	1	163	0.000436434	162.999	0.000872867	163	5.35501e-06	5.37192e-06
	7.92	1	173	0	173	0	173	0	0	8.8	1	164	0.00043912	163.999	0.000878239	164	5.35512e-06	5.37212e-06
	7.89	1	174	0	174	0	174	0	0	8.64	1	165	0.000441806	164.999	0.000883612	165	5.35522e-06	5.37233e-06
	7.77	1	175	0	175	0	175	0	0	8.32	1	166	0.000444492	165.999	0.000888984	166	5.35533e-06	5.37254e-06
	7.68	1	176	0	176	0	176	0	0	8.18	1	167	0.000447178	166.999	0.000894357	167	5.35543e-06	5.37275e-06
	7.6	1	177	0	177	0	177	0	0	8.14	1	168	0.000449865	167.999	0.00089973	168	5.35554e-06	5.37296e-06
	7.55	1	178	0	178	0	178	0	0	8	1	169	0.000452552	168.999	0.000905103	169	5.35564e-06	5.37348e-06
	7.48	1	179	0	179	0	179	0	0	8	1	170	0.000455238	169.999	0.000910476	170	5.35574e-06	5.37348e-06
	7.44	1	180	0	180	0	180	0	0	8	1	171	0.000457925	170.999	0.00091585	171	5.35585e-06	5.37348e-06
	7.31	1	181	0	181	0	181	0	0	8	1	172	0.000460612	171.999	0.000921224	172	5.35595e-06	5.37348e-06
	7.2	1	182	0	182	0	182	0	0	7.92	1	173	0.000463299	172.999	0.000926598	173	5.35606e-06	5.37401e-06
	7.09	1	183	0	183	0	183	0	0	7.89	1	174	0.000465986	173.999	0.000931972	174	5.35616e-06	5.37422e-06
	6.9	1	184	0	184	0	184	0	0	7.77	1	175	0.000468673	174.999	0.000937346	175	5.35627e-06	5.37443e-06
	6.89	1	185	0	185	0	185	0	0	7.68	1	176	0.000471361	175.999	0.000942721	176	5.35637e-06	5.37463e-06
	6.86	1	186	0	186	0	186	0	0	7.6	1	177	0.000474048	176.999	0.000948096	177	5.35647e-06	5.37484e-06
	6.76	1	187	0	187	0	187	0	0	7.55	1	178	0.000476735	177.999	0.000953471	178	5.35658e-06	5.37505e-06
	6.65	1	188	0	188	0	188	0	0	7.48	1	179	0.000479423	178.999	0.000958846	179	5.35668e-06	5.37526e-06
	6.63	1	189	0	189	0	189	0	0	7.44	1	180	0.000482111	179.999	0.000964222	180	5.35679e-06	5.37547e-06
	6.6	1	190	0	190	0	190	0	0	7.31	1	181	0.000484799	180.999	0.000969597	181	5.35689e-06	5.37568e-06
	6.47	1	191	0	191	0	191	0	0	7.2	1	182	0.000487487	181.999	0.000974973	182	5.357e-06	5.37589e-06
	6.43	1	192	0	192	0	192	0	0	7.09	1	183	0.000490175	182.999	0.000980349	183	5.3571e-06	5.3761e-06
	6.42	1	193	0	193	0	193	0	0	6.9	1	184	0.000492863	183.999	0.000985726	184	5.3572e-06	5.37631e-06
	6.23	0.999999	194	0	194	0	194	0	0	6.89	1	185	0.000495551	184.999	0.000991102	185	5.35731e-06	5.37652e-06
	6.16	0.999999	195	0	195	0	195	0	0	6.86	1	186	0.000498239	185.999	0.000996479	186	5.35741e-06	5.37673e-06
	6.04	0.999999	196	0	196	0	196	0	0	6.76	1	186.999	0.000500928	186.999	0.00100186	187	5.35752e-06	5.37694e-06
	6.02	0.999999	199	0	199	0	199	0	0	6.65	1	187.999	0.000503617	187.999	0.00100723	188	5.35762e-06	5.37715e-06
	6.01	0.999999	200	0	200	0	200	0	0	6.63	1	188.999	0.000506305	188.999	0.00101261	189	5.35773e-06	5.37735e-06
	6	0.999999	213	0	213	0	213	0	0	6.6	1	189.999	0.000508994	189.999	0.00101799	190	5.35783e-06	5.37756e-06
	5.85	0.999999	214	0	214	0	214	0	0	6.47	1	190.999	0.000511683	190.999	0.00102337	191	5.35794e-06	5.37777e-06
	5.8	0.999998	215	0	215	0	215	0	0	6.43	1	191.999	0.000514372	191.999	0.00102874	192	5.35804e-06	5.37798e-06
	5.77	0.999998	216	0	216	0	216	0	0	6.42	1	192.999	0.000517061	192.999	0.00103412	193	5.35814e-06	5.37819e-06
	5.75	0.999998	217	0	217	0	217	0	0	6.23	0.999999	193.999	0.00051975	193.999	0.0010395	194	5.35825e-06	5.3784e-06
	5.69	0.999998	218	0	218	0	218	0	0	6.16	0.999999	194.999	0.000522439	194.999	0.00104488	195	5.35835e-06	5.37861e-06
	5.58	0.999997	219	0	219	0	219	0	0	6.04	0.999999	195.999	0.000525129	195.999	0.00105026	196	5.35846e-06	5.37882e-06
	5.51	0.999997	220	0	220	0	220	0	0	6.02	0.999999	196.999	0.000527818	196.999	0.00105564	197	5.35856e-06	5.37924e-06
	5.48	0.999997	222	0	222	0	222	0	0	6.02	0.999999	197.999	0.000530508	197.999	0.00106102	198	5.35867e-06	5.37924e-06
	5.36	0.999996	224	0	224	0	224	0	0	6.02	0.999999	198.999	0.000533198	198.999	0.0010664	199	5.35877e-06	5.37924e-06
	5.35	0.999996	226	0	226	0	226	0	0	6.01	0.999999	199.999	0.000535888	199.999	0.00107178	200	5.35888e-06	5.37966e-06
	5.18	0.999993	227	0	227	0	227	0	0	6	0.999999	200.999	0.000538577	200.999	0.00107715	201	5.35898e-06	5.38112e-06
	5	0.99999	228	0	228	0	228	0	0	6	0.999999	201.999	0.000541268	201.999	0.00108254	202	5.35908e-06	5.38112e-06
	4.95	0.999989	229	0	229	0	229	0	0	6	0.999999	202.999	0.000543958	202.999	0.00108792	203	5.35919e-06	5.38112e-06
	4.86	0.999986	230	0	230	0	230	0	0	6	0.999999	203.999	0.000546648	203.999	0.0010933	204	5.35929e-06	5.38112e-06
	4.83	0.999985	231	0	231	0	231	0	0	6	0.999999	204.999	0.000549338	204.999	0.00109868	205	5.3594e-06	5.38112e-06
	4.75	0.999982	232	0	232	0	232	0	0	6	0.999999	205.999	0.000552029	205.999	0.00110406	206	5.3595e-06	5.38112e-06
	4.74	0.999982	233	0	233	0	233	0	0	6	0.999999	206.999	0.000554719	206.999	0.00110944	207	5.35961e-06	5.38112e-06
	4.67	0.999979	235	0	235	0	235	0	0	6	0.999999	207.999	0.00055741	207.999	0.00111482	208	5.35971e-06	5.38112e-06
	4.65	0.999978	236	0	236	0	236	0	0	6	0.999999	208.999	0.000560101	208.999	0.0011202	209	5.35982e-06	5.38112e-06
	4.63	0.999977	237	0	237	0	237	0	0	6	0.999999	209.999	0.000562792	209.999	0.00112558	210	5.35992e-06	5.38112e-06
	4.55	0.999972	238	0	238	0	238	0	0	6	0.999999	210.999	0.000565483	210.999	0.00113097	211	5.36002e-06	5.38112e-06
	4.37	0.999957	239	0	239	0	239	0	0	6	0.999999	211.999	0.000568174	211.999	0.00113635	212	5.36013e-06	5.38112e-06
	4.36	0.999956	240	0	240	0	240	0	0	6	0.999999	212.999	0.000570865	212.999	0.00114173	213	5.36023e-06	5.38112e-06
	4.31	0.999951	241	0	241	0	241	0	0	5.85	0.999999	213.999	0.000573556	213.999	0.00114711	214	5.36034e-06	5.38259e-06
	4.19	0.999935	242	0	242	0	242	0	0	5.8	0.999998	214.999	0.000576248	214.999	0.0011525	215	5.36044e-06	5.3828e-06
	4.15	0.999929	243	0	243	0	243	0	0	5.77	0.999998	215.999	0.000578939	215.999	0.00115788	216	5.36055e-06	5.38301e-06
	4.06	0.999913	245	0	245	0	245	0	0	5.75	0.999998	216.999	0.000581631	216.999	0.00116326	217	5.36065e-06	5.38322e-06
	4.05	0.999911	246	0	246	0	246	0	0	5.69	0.999998	217.999	0.000584322	217.999	0.00116864	218	5.36076e-06	5.38343e-06
	4.04	0.999909	248	0	248	0	248	0	0	5.58	0.999997	218.999	0.000587014	218.999	0.00117403	219	5.36086e-06	5.38364e-06
	4.03	0.999907	250	0	250	0	250	0	0	5.51	0.999997	219.999	0.000589706	219.999	0.00117941	220	5.36096e-06	5.38385e-06
	4.01	0.999902	253	0	253	0	253	0	0	5.48	0.999997	220.999	0.000592398	220.999	0.0011848	221	5.36107e-06	5.38416e-06
	4	0.9999	276	0	276	0	276	0	0	5.48	0.999997	221.999	0.00059509	221.999	0.00119018	222	5.36117e-06	5.38416e-06
	3.92	0.99988	278	0	278	0	278	0	0	5.36	0.999996	222.999	0.000597783	222.999	0.00119557	223	5.36128e-06	5.38458e-06
	3.85	0.999859	281	0	281	0	281	0	0	5.36	0.999996	223.999	0.000600475	223.999	0.00120095	224	5.36138e-06	5.38458e-06
	3.77	0.99983	282	0	282	0	282	0	0	5.35	0.999996	224.999	0.000603167	224.999	0.00120633	225	5.36149e-06	5.385e-06
	3.62	0.99976	283	0	283	0	283	0	0	5.35	0.999996	225.999	0.00060586	225.999	0.00121172	226	5.36159e-06	5.385e-06
	3.58	0.999737	284	0	284	0	284	0	0	5.18	0.999993	226.999	0.000608553	226.999	0.00121711	227	5.3617e-06	5.38531e-06
	3.52	0.999698	285	0	285	0	285	0	0	5	0.99999	227.999	0.000611245	227.999	0.00122249	228	5.3618e-06	5.38552e-06
	3.48	0.999669	286	0	286	0	286	0	0	4.95	0.999989	228.999	0.000613938	228.999	0.00122788	229	5.36191e-06	5.38573e-06
	3.46	0.999653	287	0	287	0	287	0	0	4.86	0.999986	229.999	0.000616631	229.999	0.00123326	230	5.36201e-06	5.38594e-06
	3.38	0.999583	288	0	288	0	288	0	0	4.83	0.999985	230.999	0.000619324	230.999	0.00123865	231	5.36211e-06	5.38615e-06
	3.35	0.999553	289	0	289	0	289	0	0	4.75	0.999982	231.999	0.000622017	231.999	0.00124403	232	5.36222e-06	5.38636e-06
	3.3	0.999499	290	0	290	0	290	0	0	4.74	0.999982	232.999	0.000624711	232.999	0.00124942	233	5.36232e-06	5.38657e-06
	3.17	0.999324	291	0	291	0	291	0	0	4.67	0.999979	233.999	0.000627404	233.999	0.00125481	234	5.36243e-06	5.38689e-06
	3.09	0.999187	292	0	292	0	292	0	0	4.67	0.999979	234.999	0.000630098	234.999	0.0012602	235	5.36253e-06	5.38689e-06
	3.02	0.999045	293	0	293	0	293	0	0	4.65	0.999978	235.999	0.000632791	235.999	0.00126558	236	5.36264e-06	5.3872e-06
	2.98	0.998953	294	0	294	0	294	0	0	4.63	0.999977	236.999	0.000635485	236.999	0.00127097	237	5.36274e-06	5.38741e-06
	2.97	0.998928	295	0	295	0	295	0	0	4.55	0.999972	237.999	0.000638179	237.999	0.00127636	238	5.36285e-06	5.38762e-06
	2.85	0.998587	296	0	296	0	296	0	0	4.37	0.999957	238.999	0.000640873	238.999	0.00128175	239	5.36295e-06	5.38783e-06
	2.81	0.998451	297	0	297	0	297	0	0	4.36	0.999956	239.999	0.000643567	239.999	0.00128713	240	5.36306e-06	5.38804e-06
	2.79	0.998378	298	0	298	0	298	0	0	4.31	0.999951	240.999	0.000646261	240.999	0.00129252	241	5.36316e-06	5.38825e-06
	2.75	0.998222	300	0	300	0	300	0	0	4.19	0.999935	241.999	0.000648955	241.999	0.00129791	242	5.36326e-06	5.38846e-06
	2.69	0.997958	301	0	301	0	301	0	0	4.15	0.999929	242.999	0.000651649	242.999	0.0013033	243	5.36337e-06	5.38867e-06
	2.65	0.997761	302	0	302	0	302	0	0	4.06	0.999913	243.999	0.000654344	243.999	0.00130869	244	5.36347e-06	5.38898e-06
	2.64	0.997709	303	0	303	0	303	0	0	4.06	0.999913	244.999	0.000657038	244.999	0.00131408	245	5.36358e-06	5.38898e-06
	2.56	0.997246	304	0	304	0	304	0	0	4.05	0.999911	245.999	0.000659733	245.999	0.00131947	246	5.36368e-06	5.3893e-06
	2.54	0.997116	305	0	305	0	305	0	0	4.04	0.999909	246.999	0.000662428	246.999	0.00132486	247	5.36379e-06	5.38961e-06
	2.53	0.997049	306	0	306	0	306	0	0	4.04	0.999909	247.999	0.000665123	247.999	0.00133025	248	5.36389e-06	5.38961e-06
	2.48	0.996689	307	0	307	0	307	0	0	4.03	0.999907	248.999	0.000667818	248.999	0.00133564	249	5.364e-06	5.39003e-06
	2.42	0.996198	308	0	308	0	308	0	0	4.03	0.999907	249.999	0.000670513	249.999	0.00134103	250	5.3641e-06	5.39003e-06
	2.33	0.995323	309	0	309	0	309	0	0	4.01	0.999902	250.999	0.000673208	250.999	0.00134642	251	5.36421e-06	5.39056e-06
	2.29	0.994871	310	0	310	0	310	0	0	4.01	0.999902	251.999	0.000675903	251.999	0.00135181	252	5.36431e-06	5.39056e-06
	2.28	0.994752	312	0	312	0	312	0	0	4.01	0.999902	252.999	0.000678598	252.999	0.0013572	253	5.36441e-06	5.39056e-06
	2.26	0.994505	313	0	313	0	313	0	0	4	0.9999	253.999	0.000681294	253.999	0.00136259	254	5.36452e-06	5.39329e-06
	2.23	0.994112	314	0	314	0	314	0	0	4	0.9999	254.999	0.000683989	254.999	0.00136798	255	5.36462e-06	5.39329e-06
	2.22	0.993974	315	0	315	0	315	0	0	4	0.9999	255.999	0.000686685	255.999	0.00137337	256	5.36473e-06	5.39329e-06
	2.21	0.993834	316	0	316	0	316	0	0	4	0.9999	256.999	0.000689381	256.999	0.00137876	257	5.36483e-06	5.39329e-06
	2.2	0.99369	317	0	317	0	317	0	0	4	0.9999	257.999	0.000692077	257.999	0.00138415	258	5.36494e-06	5.39329e-06
	2.19	0.993543	319	0	319	0	319	0	0	4	0.9999	258.999	0.000694773	258.999	0.00138955	259	5.36504e-06	5.39329e-06
	2.16	0.993082	320	0	320	0	320	0	0	4	0.9999	259.999	0.000697469	259.999	0.00139494	260	5.36515e-06	5.39329e-06
	2.14	0.992756	322	0	322	0	322	0	0	4	0.9999	260.999	0.000700165	260.999	0.00140033	261	5.36525e-06	5.39329e-06
	2.13	0.992587	323	0	323	0	323	0	0	4	0.9999	261.999	0.000702862	261.999	0.00140572	262	5.36536e-06	5.39329e-06
	2.11	0.992238	325	0	325	0	325	0	0	4	0.9999	262.999	0.000705558	262.999	0.00141112	263	5.36546e-06	5.39329e-06
	2.1	0.992057	326	0	326	0	326	0	0	4	0.9999	263.999	0.000708255	263.999	0.00141651	264	5.36556e-06	5.39329e-06
	2.07	0.991489	329	0	329	0	329	0	0	4	0.9999	264.999	0.000710951	264.999	0.0014219	265	5.36567e-06	5.39329e-06
	2.06	0.99129	330	0	330	0	330	0	0	4	0.9999	265.999	0.000713648	265.999	0.0014273	266	5.36577e-06	5.39329e-06
	2.05	0.991087	333	0	333	0	333	0	0	4	0.9999	266.999	0.000716345	266.999	0.00143269	267	5.36588e-06	5.39329e-06
	2.03	0.990667	336	0	336	0	336	0	0	4	0.9999	267.999	0.000719042	267.999	0.00143808	268	5.36598e-06	5.39329e-06
	2.02	0.99045	339	0	339	0	339	0	0	4	0.9999	268.999	0.000721739	268.999	0.00144348	269	5.36609e-06	5.39329e-06
	2.01	0.990228	347	0	347	0	347	0	0	4	0.9999	269.999	0.000724436	269.999	0.00144887	270	5.36619e-06	5.39329e-06
	2	0.99	430	0	430	0	430	0	0	4	0.9999	270.999	0.000727133	270.999	0.00145427	271	5.3663e-06	5.39329e-06
	1.92	0.987977	431	0	431	0	431	0	0	4	0.9999	271.999	0.000729831	271.999	0.00145966	272	5.3664e-06	5.39329e-06
	1.89	0.987118	433	0	433	0	433	0	0	4	0.9999	272.999	0.000732528	272.999	0.00146506	273	5.36651e-06	5.39329e-06
	1.86	0.986196	434	0	434	0	434	0	0	4	0.9999	273.999	0.000735226	273.999	0.00147045	274	5.36661e-06	5.39329e-06
	1.82	0.984864	435	0	435	0	435	0	0	4	0.9999	274.999	0.000737923	274.999	0.00147585	275	5.36672e-06	5.39329e-06
	1.81	0.984512	436	0	436	0	436	0	0	4	0.9999	275.999	0.000740621	275.999	0.00148124	276	5.36682e-06	5.39329e-06
	1.8	0.984151	437	0	437	0	437	0	0	3.92	0.99988	276.999	0.000743319	276.999	0.00148664	277	5.36693e-06	5.39593e-06
	1.74	0.981803	439	0	439	0	439	0	0	3.92	0.99988	277.999	0.000746017	277.999	0.00149203	278	5.36703e-06	5.39593e-06
	1.7	0.980047	441	0	441	0	441	0	0	3.85	0.999859	278.999	0.000748715	278.999	0.00149743	279	5.36713e-06	5.39646e-06
	1.68	0.979107	443	0	443	0	443	0	0	3.85	0.999859	279.999	0.000751414	279.998	0.00150283	280	5.36724e-06	5.39646e-06
	1.64	0.977091	444	0	444	0	444	0	0	3.85	0.999859	280.999	0.000754112	280.998	0.00150822	281	5.36734e-06	5.39646e-06
	1.62	0.976012	446	0	446	0	446	0	0	3.77	0.99983	281.999	0.00075681	281.998	0.00151362	282	5.36745e-06	5.39688e-06
	1.6	0.974881	447	0	447	0	447	0	0	3.62	0.99976	282.999	0.000759509	282.998	0.00151902	283	5.36755e-06	5.39709e-06
	1.57	0.973085	448	0	448	0	448	0	0	3.58	0.999737	283.999	0.000762207	283.998	0.00152441	284	5.36766e-06	5.39731e-06
	1.54	0.97116	449	0	449	0	449	0	0	3.52	0.999698	284.999	0.000764906	284.998	0.00152981	285	5.36776e-06	5.39752e-06
	1.52	0.9698	450	0	450	0	450	0	0	3.48	0.999669	285.999	0.000767605	285.998	0.00153521	286	5.36787e-06	5.39774e-06
	1.51	0.969097	451	0	451	0	451	0	0	3.46	0.999653	286.999	0.000770304	286.998	0.00154061	287	5.36797e-06	5.39795e-06
	1.48	0.966887	452	0	452	0	452	0	0	3.38	0.999583	287.999	0.000773003	287.998	0.00154601	288	5.36808e-06	5.39816e-06
	1.47	0.966116	454	0	454	0	454	0	0	3.35	0.999553	288.999	0.000775702	288.998	0.0015514	289	5.36818e-06	5.39838e-06
	1.43	0.962846	456	0	456	0	456	0	0	3.3	0.999499	289.999	0.000778402	289.998	0.0015568	290	5.36829e-06	5.3986e-06
	1.41	0.961095	457	0	457	0	457	0	0	3.17	0.999324	290.999	0.000781101	290.998	0.0015622	291	5.36839e-06	5.39881e-06
	1.39	0.959262	458	0	458	0	458	0	0	3.09	0.999187	291.999	0.000783801	291.998	0.0015676	292	5.3685e-06	5.39903e-06
	1.34	0.954291	460	0	460	0	460	0	0	3.02	0.999045	292.999	0.0007865	292.998	0.001573	293	5.3686e-06	5.39925e-06
	1.27	0.946297	461	0	461	0	461	0	0	2.98	0.998953	293.999	0.0007892	293.998	0.0015784	294	5.36871e-06	5.39947e-06
	1.19	0.935435	462	0	462	0	462	0	0	2.97	0.998928	294.999	0.0007919	294.998	0.0015838	295	5.36881e-06	5.39969e-06
	1.15	0.929205	463	0	463	0	463	0	0	2.85	0.998587	295.999	0.0007946	295.998	0.0015892	296	5.36892e-06	5.39991e-06
	1.11	0.922375	464	0	464	0	464	0	0	2.81	0.998451	296.999	0.0007973	296.998	0.0015946	297	5.36902e-06	5.40013e-06
	1.09	0.918717	465	0	465	0	465	0	0	2.79	0.998378	297.999	0.0008	297.998	0.0016	298	5.36913e-06	5.40036e-06
	1.08	0.916824	466	0	466	0	466	0	0	2.75	0.998222	298.999	0.0008027	298.998	0.0016054	299	5.36923e-06	5.4007e-06
	1.05	0.910875	467	0	467	0	467	0	0	2.75	0.998222	299.999	0.000805401	299.998	0.0016108	300	5.36934e-06	5.4007e-06
	1.04	0.908799	468	0	468	0	468	0	0	2.69	0.997958	300.999	0.000808101	300.998	0.0016162	301	5.36944e-06	5.40104e-06
	1.03	0.906675	469	0	469	0	469	0	0	2.65	0.997761	301.999	0.000810802	301.998	0.0016216	302	5.36955e-06	5.40127e-06
	1	0.9	470	0	470	0	470	0	0	2.64	0.997709	302.999	0.000813503	302.998	0.00162701	303	5.36965e-06	5.40151e-06
	0.95	0.887798	472	0	472	0	472	0	0	2.56	0.997246	303.999	0.000816203	303.998	0.00163241	304	5.36976e-06	5.40175e-06
	0.94	0.885185	473	0	473	0	473	0	0	2.54	0.997116	304.999	0.000818904	304.998	0.00163781	305	5.36987e-06	5.40199e-06
	0.93	0.88251	474	0	474	0	474	0	0	2.53	0.997049	305.999	0.000821606	305.998	0.00164321	306	5.36997e-06	5.40223e-06
	0.91	0.876973	476	0	476	0	476	0	0	2.48	0.996689	306.999	0.000824307	306.998	0.00164861	307	5.37008e-06	5.40248e-06
	0.83	0.852089	478	0	478	0	478	0	0	2.42	0.996198	307.999	0.000827008	307.998	0.00165402	308	5.37018e-06	5.40273e-06
	0.82	0.848644	479	0	479	0	479	0	0	2.33	0.995323	308.999	0.00082971	308.998	0.00165942	309	5.37029e-06	5.40298e-06
	0.81	0.845118	480	0	480	0	480	0	0	2.29	0.994871	309.999	0.000832411	309.998	0.00166482	310	5.3704e-06	5.40325e-06
	0.79	0.837819	481	0	481	0	481	0	0	2.28	0.994752	310.999	0.000835113	310.998	0.00167023	311	5.3705e-06	5.40365e-06
	0.78	0.834041	483	0	483	0	483	0	0	2.28	0.994752	311.999	0.000837815	311.998	0.00167563	312	5.37061e-06	5.40365e-06
	0.73	0.813791	484	0	484	0	484	0	0	2.26	0.994505	312.999	0.000840517	312.998	0.00168103	313	5.37072e-06	5.40406e-06
	0.7	0.800474	485	0	485	0	485	0	0	2.23	0.994112	313.999	0.000843219	313.998	0.00168644	314	5.37082e-06	5.40435e-06
	0.69	0.795826	485	1	484	2	486	0.00411523	0.00407332	2.22	0.993974	314.999	0.000845921	314.998	0.00169184	315	5.37093e-06	5.40465e-06
	0.64	0.770913	486	1	485	2	487	0.00410678	0.00407332	2.21	0.993834	315.999	0.000848624	315.998	0.00169725	316	5.37104e-06	5.40495e-06
	0.63	0.765577	487	1	486	2	488	0.00409836	0.00407332	2.2	0.99369	316.999	0.000851327	316.998	0.00170265	317	5.37115e-06	5.40527e-06
	0.62	0.760117	488	1	487	2	489	0.00408998	0.00407332	2.19	0.993543	317.999	0.000854029	317.998	0.00170806	318	5.37125e-06	5.40577e-06
	0.6	0.748811	490	1	489	2	491	0.00407332	0.00407332	2.19	0.993543	318.999	0.000856732	318.998	0.00171346	319	5.37136e-06	5.40577e-06
	0.57	0.730847	490	2	488	4	492	0.00813008	0.00784314	2.16	0.993082	319.999	0.000859436	319.998	0.00171887	320	5.37147e-06	5.4063e-06
	0.55	0.718162	492	2	490	4	494	0.00809717	0.00784314	2.14	0.992756	320.999	0.000862139	320.998	0.00172428	321	5.37158e-06	5.40686e-06
	0.54	0.711597	493	2	491	4	495	0.00808081	0.00784314	2.14	0.992756	321.999	0.000864842	321.998	0.00172968	322	5.37169e-06	5.40686e-06
	0.53	0.704879	495	2	493	4	497	0.00804829	0.00784314	2.13	0.992587	322.999	0.000867546	322.998	0.00173509	323	5.3718e-06	5.40747e-06
	0.5	0.683772	496	2	494	4	498	0.00803213	0.00784314	2.11	0.992238	323.999	0.00087025	323.998	0.0017405	324	5.37191e-06	5.40813e-06
	0.48	0.668869	497	2	495	4	499	0.00801603	0.00784314	2.11	0.992238	324.999	0.000872954	324.998	0.00174591	325	5.37203e-06	5.40813e-06
	0.47	0.661156	498	2	496	4	500	0.008	0.00784314	2.1	0.992057	325.999	0.000875659	325.998	0.00175132	326	5.37214e-06	5.40885e-06
	0.46	0.653263	499	2	497	4	501	0.00798403	0.00784314	2.07	0.991489	326.999	0.000878363	326.998	0.00175673	327	5.37225e-06	5.40992e-06
	0.43	0.628465	500	2	498	4	502	0.00796813	0.00784314	2.07	0.991489	327.999	0.000881068	327.998	0.00176214	328	5.37237e-06	5.40992e-06
	0.42	0.619811	502	2	500	4	504	0.00793651	0.00784314	2.07	0.991489	328.999	0.000883774	328.998	0.00176755	329	5.37248e-06	5.40992e-06
	0.41	0.610955	504	2	502	4	506	0.00790514	0.00784314	2.06	0.99129	329.999	0.000886479	329.998	0.00177296	330	5.3726e-06	5.41114e-06
	0.4	0.601893	505	2	503	4	507	0.00788955	0.00784314	2.05	0.991087	330.999	0.000889185	330.998	0.00177837	331	5.37272e-06	5.41254e-06
	0.39	0.59262	507	2	505	4	509	0.00785855	0.00784314	2.05	0.991087	331.999	0.000891891	331.998	0.00178378	332	5.37284e-06	5.41254e-06
	0.38	0.583131	508	2	506	4	510	0.00784314	0.00784314	2.05	0.991087	332.999	0.000894598	332.998	0.0017892	333	5.37296e-06	5.41254e-06
	0.36	0.563484	508	4	504	8	512	0.015625	0.0152964	2.03	0.990667	333.999	0.000897305	333.998	0.00179461	334	5.37308e-06	5.41511e-06
	0.33	0.532265	511	4	507	8	515	0.015534	0.0152964	2.03	0.990667	334.999	0.000900013	334.998	0.00180003	335	5.37321e-06	5.41511e-06
	0.32	0.52137	512	4	508	8	516	0.0155039	0.0152964	2.03	0.990667	335.999	0.000902721	335.998	0.00180544	336	5.37334e-06	5.41511e-06
	0.31	0.510221	513	4	509	8	517	0.0154739	0.0152964	2.02	0.99045	336.999	0.000905429	336.998	0.00181086	337	5.37347e-06	5.41839e-06
	0.3	0.498813	514	4	510	8	518	0.015444	0.0152964	2.02	0.99045	337.999	0.000908139	337.998	0.00181628	338	5.3736e-06	5.41839e-06
	0.29	0.487139	518	4	514	8	522	0.0153257	0.0152964	2.02	0.99045	338.999	0.000910848	338.998	0.0018217	339	5.37374e-06	5.41839e-06
	0.28	0.475193	519	4	515	8	523	0.0152964	0.0152964	2.01	0.990228	339.999	0.000913559	339.998	0.00182712	340	5.37388e-06	5.42726e-06
	0.27	0.462968	520	5	515	10	525	0.0190476	0.0190476	2.01	0.990228	340.999	0.00091627	340.998	0.00183254	341	5.37402e-06	5.42726e-06
	0.26	0.450459	520	6	514	12	526	0.0228137	0.0227704	2.01	0.990228	341.999	0.000918982	341.998	0.00183796	342	5.37417e-06	5.42726e-06
	0.25	0.437659	521	6	515	12	527	0.0227704	0.0227704	2.01	0.990228	342.999	0.000921696	342.998	0.00184339	343	5.37432e-06	5.42726e-06
	0.24	0.42456	521	7	514	14	528	0.0265152	0.0263158	2.01	0.990228	343.999	0.00092441	343.998	0.00184882	344	5.37448e-06	5.42726e-06
	0.23	0.411156	525	7	518	14	532	0.0263158	0.0263158	2.01	0.990228	344.999	0.000927125	344.998	0.00185425	345	5.37464e-06	5.42726e-06
	0.22	0.39744	526	8	518	16	534	0.0299625	0.0299625	2.01	0.990228	345.999	0.000929842	345.998	0.00185968	346	5.37481e-06	5.42726e-06
	0.21	0.383405	526	9	517	18	535	0.0336449	0.0336449	2.01	0.990228	346.999	0.000932559	346.998	0.00186512	347	5.37498e-06	5.42726e-06
	0.2	0.369043	527	10	517	20	537	0.0372439	0.0372439	2	0.99	347.999	0.000935279	347.998	0.00187056	348	5.37517e-06	7.58725e-06
	0.19	0.354346	528	12	516	24	540	0.0444444	0.0440367	2	0.99	348.999	0.000938	348.998	0.001876	349	5.37536e-06	7.58725e-06
	0.17	0.323917	531	12	519	24	543	0.0441989	0.0440367	2	0.99	349.999	0.000940723	349.998	0.00188145	350	5.37556e-06	7.58725e-06
	0.16	0.308169	533	12	521	24	545	0.0440367	0.0440367	2	0.99	350.999	0.000943448	350.998	0.0018869	351	5.37577e-06	7.58725e-06
	0.15	0.292054	535	13	522	26	548	0.0474453	0.0474453	2	0.99	351.999	0.000946175	351.998	0.00189235	352	5.376e-06	7.58725e-06
	0.14	0.275564	538	15	523	30	553	0.0542495	0.0542495	2	0.99	352.999	0.000948905	352.998	0.00189781	353	5.37623e-06	7.58725e-06
	0.13	0.25869	540	16	524	32	556	0.057554	0.057554	2	0.99	353.999	0.000951638	353.998	0.00190328	354	5.37648e-06	7.58725e-06
	0.12	0.241422	543	18	525	36	561	0.0641711	0.0641711	2	0.99	354.999	0.000954373	354.998	0.00190875	355	5.37675e-06	7.58725e-06
	0.11	0.223753	547	19	528	38	566	0.0671378	0.0671378	2	0.99	355.999	0.000957112	355.998	0.00191422	356	5.37704e-06	7.58725e-06
	0.1	0.205672	551	21	530	42	572	0.0734266	0.0734266	2	0.99	356.999	0.000959855	356.998	0.00191971	357	5.37734e-06	7.58725e-06
	0.09	0.187169	554	23	531	46	577	0.0797227	0.0797227	2	0.99	357.999	0.000962602	357.998	0.0019252	358	5.37767e-06	7.58725e-06
	0.08	0.168236	566	25	541	50	591	0.0846024	0.0846024	2	0.99	358.999	0.000965354	358.998	0.00193071	359	5.37802e-06	7.58725e-06
	0.07	0.148862	571	26	545	52	597	0.0871022	0.0871022	2	0.99	359.999	0.00096811	359.998	0.00193622	360	5.37839e-06	7.58725e-06
	0.06	0.129036	578	29	549	58	607	0.0955519	0.0955519	2	0.99	360.999	0.000970873	360.998	0.00194175	361	5.3788e-06	7.58725e-06
	0.05	0.108749	583	34	549	68	617	0.110211	0.110211	2	0.99	361.999	0.000973642	361.998	0.00194728	362	5.37924e-06	7.58725e-06
										2	0.99	362.999	0.000976418	362.998	0.00195284	363	5.37971e-06	7.58725e-06
										2	0.99	363.999	0.000979201	363.998	0.0019584	364	5.38023e-06	7.58725e-06
										2	0.99	364.999	0.000981994	364.998	0.00196399	365	5.38079e-06	7.58725e-06
										2	0.99	365.999	0.000984795	365.998	0.00196959	366	5.3814e-06	7.58725e-06
										2	0.99	366.999	0.000987608	366.998	0.00197522	367	5.38206e-06	7.58725e-06
										2	0.99	367.999	0.000990433	367.998	0.00198087	368	5.38279e-06	7.58725e-06
										2	0.99	368.999	0.00099327	368.998	0.00198654	369	5.38358e-06	7.58725e-06
										2	0.99	369.999	0.000996123	369.998	0.00199225	370	5.38445e-06	7.58725e-06
										2	0.99	370.999	0.000998991	370.998	0.00199798	371	5.3854e-06	7.58725e-06
										2	0.99	371.999	0.00100188	371.998	0.00200376	372	5.38644e-06	7.58725e-06
										2	0.99	372.999	0.00100478	372.998	0.00200957	373	5.38759e-06	7.58725e-06
										2	0.99	373.999	0.00100771	373.998	0.00201543	374	5.38884e-06	7.58725e-06
										2	0.99	374.999	0.00101067	374.998	0.00202134	375	5.39023e-06	7.58725e-06
										2	0.99	375.999	0.00101365	375.998	0.0020273	376	5.39175e-06	7.58725e-06
										2	0.99	376.999	0.00101666	376.998	0.00203332	377	5.39343e-06	7.58725e-06
										2	0.99	377.999	0.00101971	377.998	0.00203942	378	5.39528e-06	7.58725e-06
										2	0.99	378.999	0.00102279	378.998	0.00204558	379	5.39732e-06	7.58725e-06
										2	0.99	379.999	0.00102592	379.998	0.00205184	380	5.39957e-06	7.58725e-06
										2	0.99	380.999	0.00102909	380.998	0.00205818	381	5.40205e-06	7.58725e-06
										2	0.99	381.999	0.00103232	381.998	0.00206463	382	5.4048e-06	7.58725e-06
										2	0.99	382.999	0.0010356	382.998	0.0020712	383	5.40783e-06	7.58725e-06
										2	0.99	383.999	0.00103895	383.998	0.00207789	384	5.41118e-06	7.58725e-06
										2	0.99	384.999	0.00104237	384.998	0.00208473	385	5.41488e-06	7.58725e-06
										2	0.99	385.999	0.00104586	385.998	0.00209173	386	5.41898e-06	7.58725e-06
										2	0.99	386.999	0.00104945	386.998	0.0020989	387	5.42351e-06	7.58725e-06
										2	0.99	387.999	0.00105313	387.998	0.00210627	388	5.42853e-06	7.58725e-06
										2	0.99	388.999	0.00105693	388.998	0.00211386	389	5.43408e-06	7.58725e-06
										2	0.99	389.999	0.00106084	389.998	0.00212169	390	5.44023e-06	7.58725e-06
										2	0.99	390.999	0.0010649	390.998	0.00212979	391	5.44703e-06	7.58725e-06
										2	0.99	391.999	0.0010691	391.998	0.00213819	392	5.45457e-06	7.58725e-06
										2	0.99	392.999	0.00107346	392.998	0.00214693	393	5.46292e-06	7.58725e-06
										2	0.99	393.999	0.00107802	393.998	0.00215603	394	5.47217e-06	7.58725e-06
										2	0.99	394.999	0.00108278	394.998	0.00216555	395	5.48242e-06	7.58725e-06
										2	0.99	395.999	0.00108777	395.998	0.00217553	396	5.49377e-06	7.58725e-06
										2	0.99	396.999	0.00109301	396.998	0.00218602	397	5.50635e-06	7.58725e-06
										2	0.99	397.999	0.00109854	397.998	0.00219708	398	5.5203e-06	7.58725e-06
										2	0.99	398.999	0.00110438	398.998	0.00220877	399	5.53576e-06	7.58725e-06
										2	0.99	399.999	0.00111058	399.998	0.00222116	400	5.55289e-06	7.58725e-06
										2	0.99	400.999	0.00111716	400.998	0.00223433	401	5.57189e-06	7.58725e-06
										2	0.99	401.999	0.00112418	401.998	0.00224837	402	5.59295e-06	7.58725e-06
										2	0.99	402.999	0.00113168	402.998	0.00226337	403	5.6163e-06	7.58725e-06
										2	0.99	403.999	0.00113972	403.998	0.00227945	404	5.64219e-06	7.58725e-06
										2	0.99	404.999	0.00114836	404.998	0.00229672	405	5.6709e-06	7.58725e-06
										2	0.99	405.999	0.00115766	405.998	0.00231531	406	5.70274e-06	7.58725e-06
										2	0.99	406.999	0.00116769	406.998	0.00233538	407	5.73804e-06	7.58725e-06
										2	0.99	407.999	0.00117855	407.998	0.0023571	408	5.7772e-06	7.58725e-06
										2	0.99	408.999	0.00119032	408.998	0.00238063	409	5.82062e-06	7.58725e-06
										2	0.99	409.999	0.0012031	409.998	0.0024062	410	5.86878e-06	7.58725e-06
										2	0.99	410.999	0.00121701	410.998	0.00243402	411	5.9222e-06	7.58725e-06
										2	0.99	411.999	0.00123218	411.998	0.00246436	412	5.98145e-06	7.58725e-06
										2	0.99	412.999	0.00124874	412.998	0.00249748	413	6.04717e-06	7.58725e-06
										2	0.99	413.999	0.00126685	413.997	0.00253371	414	6.12006e-06	7.58725e-06
										2	0.99	414.999	0.00128669	414.997	0.00257338	415	6.20092e-06	7.58725e-06
										2	0.99	415.999	0.00130845	415.997	0.0026169	416	6.29062e-06	7.58725e-06
										2	0.99	416.999	0.00133234	416.997	0.00266468	417	6.39012e-06	7.58725e-06
										2	0.99	417.999	0.0013586	417.997	0.00271721	418	6.50049e-06	7.58725e-06
										2	0.99	418.999	0.00138751	418.997	0.00277501	419	6.62294e-06	7.58725e-06
										2	0.99	419.999	0.00141934	419.997	0.00283869	420	6.75878e-06	7.58725e-06
										2	0.99	420.999	0.00145444	420.997	0.00290889	421	6.90947e-06	7.58725e-06
										2	0.99	421.999	0.00149317	421.997	0.00298635	422	7.07665e-06	7.58725e-06
										2	0.99	422.998	0.00153594	422.997	0.00307188	423	7.26212e-06	7.58725e-06
										2	0.99	423.998	0.00158319	423.997	0.00316639	424	7.46789e-06	7.58725e-06
										2	0.99	424.998	0.00163544	424.997	0.00327088	425	7.69618e-06	7.58725e-06
										2	0.99	425.998	0.00169323	425.997	0.00338647	426	7.94945e-06	7.58725e-06
										2	0.99	426.998	0.0017572	426.996	0.0035144	427	8.23046e-06	7.58725e-06
										2	0.99	427.998	0.00182804	427.996	0.00365607	428	8.54222e-06	7.58725e-06
										2	0.99	428.998	0.0019065	428.996	0.003813	429	8.88812e-06	7.58725e-06
										2	0.99	429.998	0.00199346	429.996	0.00398692	430	9.2719e-06	7.58725e-06
										1.92	0.987977	430.998	0.00208986	430.996	0.00417971	431	9.69771e-06	0.000192706
										1.89	0.987118	431.998	0.00219675	431.996	0.0043935	432	1.01701e-05	0.000225054
										1.89	0.987118	432.998	0.00231532	432.995	0.00463065	433	1.06943e-05	0.000225054
										1.86	0.986196	433.998	0.00244688	433.995	0.00489376	434	1.12759e-05	0.000262988
										1.82	0.984864	434.997	0.00259287	434.995	0.00518574	435	1.19212e-05	0.000291852
										1.81	0.984512	435.997	0.00275492	435.994	0.00550984	436	1.26372e-05	0.000323949
										1.8	0.984151	436.997	0.00293482	436.994	0.00586965	437	1.34317e-05	0.000359641
										1.74	0.981803	437.997	0.00313458	437.994	0.00626917	438	1.43132e-05	0.000420816
										1.74	0.981803	438.997	0.00335642	438.993	0.00671284	439	1.52912e-05	0.000420816
										1.7	0.980047	439.996	0.00360281	439.993	0.00720562	440	1.63764e-05	0.000519114
										1.7	0.980047	440.996	0.0038765	440.992	0.007753	441	1.75805e-05	0.000519114
										1.68	0.979107	441.996	0.00418055	441.992	0.00836109	442	1.89165e-05	0.000640657
										1.68	0.979107	442.995	0.00451835	442.991	0.0090367	443	2.03989e-05	0.000640657
										1.64	0.977091	443.995	0.00489369	443.99	0.00978737	444	2.20436e-05	0.000750323
										1.62	0.976012	444.995	0.00531076	444.989	0.0106215	445	2.38686e-05	0.000878901
										1.62	0.976012	445.994	0.00577423	445.988	0.0115485	446	2.58934e-05	0.000878901
										1.6	0.974881	446.994	0.00628929	446.987	0.0125786	447	2.814e-05	0.00102964
										1.57	0.973085	447.993	0.00686171	447.986	0.0137234	448	3.06326e-05	0.0011443
										1.54	0.97116	448.993	0.00749789	448.985	0.0149958	449	3.33982e-05	0.00127178
										1.52	0.9698	449.992	0.00820496	449.984	0.0164099	450	3.64665e-05	0.00141349
										1.51	0.969097	450.991	0.00899084	450.982	0.0179817	451	3.98707e-05	0.00157102
										1.48	0.966887	451.99	0.00986432	451.98	0.0197286	452	4.36474e-05	0.00174613
										1.47	0.966116	452.989	0.0108352	452.978	0.0216703	453	4.78373e-05	0.00204609
										1.47	0.966116	453.988	0.0119142	453.976	0.0238284	454	5.24855e-05	0.00204609
										1.43	0.962846	454.987	0.0131135	454.974	0.0262271	455	5.76419e-05	0.0025276
										1.43	0.962846	455.986	0.0144465	455.971	0.028893	456	6.33619e-05	0.0025276
										1.41	0.961095	456.984	0.015928	456.968	0.031856	457	6.97067e-05	0.00296158
										1.39	0.959262	457.982	0.0175745	457.965	0.0351489	458	7.67443e-05	0.00329142
										1.34	0.954291	458.981	0.0194042	458.961	0.0388085	459	8.455e-05	0.00385602
										1.34	0.954291	459.979	0.0214376	459.957	0.0428752	460	9.3207e-05	0.00385602
										1.27	0.946297	460.976	0.0236971	460.953	0.0473942	461	0.000102807	0.00451692
										1.19	0.935435	461.974	0.0262077	461.948	0.0524154	462	0.000113453	0.00501889
										1.15	0.929205	462.971	0.0289971	462.942	0.0579942	463	0.000125257	0.0055762
										1.11	0.922375	463.968	0.0320959	463.936	0.0641918	464	0.000138344	0.00619483
										1.09	0.918717	464.964	0.0355382	464.929	0.0710763	465	0.000152852	0.00688137
										1.08	0.916824	465.961	0.0393614	465.921	0.0787229	466	0.000168933	0.00764309
										1.05	0.910875	466.956	0.0436073	466.913	0.0872147	467	0.000186755	0.00848799
										1.04	0.908799	467.952	0.0483219	467.903	0.0966438	468	0.000206504	0.00942489
										1.03	0.906675	468.946	0.053556	468.893	0.107112	469	0.000228384	0.0104634
										1	0.9	469.941	0.0593657	469.881	0.118731	470	0.00025262	0.0116143
										0.95	0.887798	470.934	0.065813	470.868	0.131626	471	0.000279461	0.0135767
										0.95	0.887798	471.927	0.0729662	471.854	0.145932	472	0.000309179	0.0135767
										0.94	0.885185	472.919	0.0809006	472.838	0.161801	473	0.000342074	0.0158618
										0.93	0.88251	473.91	0.0896989	473.821	0.179398	474	0.000378476	0.017589
										0.91	0.876973	474.901	0.099452	474.801	0.198904	475	0.000418745	0.020526
										0.91	0.876973	475.89	0.11026	475.779	0.220519	476	0.000463276	0.020526
										0.83	0.852089	476.878	0.122231	476.756	0.244463	477	0.0005125	0.0251853
										0.83	0.852089	477.865	0.135487	477.729	0.270973	478	0.00056689	0.0251853
										0.82	0.848644	478.85	0.150156	478.7	0.300312	479	0.000626956	0.0293269
										0.81	0.845118	479.834	0.166382	479.667	0.332764	480	0.000693258	0.0324387
										0.79	0.837819	480.816	0.184319	480.631	0.368638	481	0.000766398	0.0358599
										0.78	0.834041	481.796	0.204135	481.592	0.408269	482	0.000847031	0.0416292
										0.78	0.834041	482.774	0.226011	482.548	0.452021	483	0.000935862	0.0416292
										0.73	0.813791	483.75	0.250143	483.5	0.500286	484	0.00103365	0.0482466
										0.7	0.800474	484.723	0.276741	484.447	0.553482	485	0.0011412	0.0531776
										0.69	0.795826	485.694	0.30603	485.388	0.61206	486	0.00125938	0.0585585
										0.64	0.770913	486.662	0.33825	486.323	0.676501	487	0.00138912	0.0644192
										0.63	0.765577	487.626	0.373656	487.253	0.747312	488	0.00153138	0.0707889
										0.62	0.760117	488.587	0.412516	488.175	0.825032	489	0.00168718	0.0776962
										0.6	0.748811	489.545	0.455112	489.09	0.910224	490	0.0018576	0.0891228
										0.6	0.748811	490.498	0.501739	489.997	1.00348	491	0.00204374	0.0891228
										0.57	0.730847	491.447	0.552701	490.895	1.1054	492	0.00224675	0.101898
										0.55	0.718162	492.392	0.608312	491.783	1.21662	493	0.0024678	0.116084
										0.55	0.718162	493.331	0.668892	492.662	1.33778	494	0.00270807	0.116084
										0.54	0.711597	494.265	0.734764	493.53	1.46953	495	0.00296874	0.131716
										0.53	0.704879	495.194	0.806249	494.388	1.6125	496	0.003251	0.148797
										0.53	0.704879	496.116	0.883665	495.233	1.76733	497	0.003556	0.148797
										0.5	0.683772	497.033	0.967323	496.065	1.93465	498	0.00388483	0.16729
										0.48	0.668869	497.942	1.05752	496.885	2.11503	499	0.00423855	0.180366
										0.47	0.661156	498.845	1.15453	497.691	2.30905	500	0.00461811	0.193999
										0.46	0.653263	499.741	1.25861	498.483	2.51722	501	0.00502438	0.208143
										0.43	0.628465	500.63	1.36999	499.26	2.73998	502	0.00545812	0.222743
										0.42	0.619811	501.511	1.48886	500.022	2.97772	503	0.00591993	0.245356
										0.42	0.619811	502.385	1.61539	500.769	3.23078	504	0.00641028	0.245356
										0.41	0.610955	503.25	1.74969	501.501	3.49939	505	0.00692948	0.276444
										0.41	0.610955	504.108	1.89185	502.216	3.78371	506	0.00747768	0.276444
										0.4	0.601893	504.958	2.0419	502.916	4.0838	507	0.00805483	0.300095
										0.39	0.59262	505.8	2.19983	503.6	4.39965	508	0.00866074	0.323704
										0.39	0.59262	506.634	2.36558	504.269	4.73116	509	0.00929501	0.323704
										0.38	0.583131	507.461	2.53906	504.922	5.07812	510	0.0099571	0.346974
										0.36	0.563484	508.28	2.72013	505.56	5.44027	511	0.0106463	0.369624
										0.36	0.563484	509.091	2.90862	506.183	5.81724	512	0.0113618	0.369624
										0.33	0.532265	509.896	3.10431	506.791	6.20862	513	0.0121026	0.405335
										0.33	0.532265	510.693	3.30697	507.386	6.61394	514	0.0128676	0.405335
										0.33	0.532265	511.484	3.51632	507.967	7.03265	515	0.0136556	0.405335
										0.32	0.52137	512.268	3.73209	508.536	7.46418	516	0.0144655	0.431561
										0.31	0.510221	513.046	3.95397	509.092	7.90794	517	0.0152958	0.443783
										0.3	0.498813	513.818	4.18165	509.637	8.36329	518	0.0161453	0.455377
										0.29	0.487139	514.585	4.4148	510.17	8.82959	519	0.0170127	0.48155
										0.29	0.487139	515.347	4.6531	510.694	9.3062	520	0.0178965	0.48155
										0.29	0.487139	516.104	4.89624	511.208	9.79248	521	0.0187955	0.48155
										0.29	0.487139	516.856	5.14389	511.712	10.2878	522	0.0197084	0.48155
										0.28	0.475193	517.604	5.39575	512.209	10.7915	523	0.0206338	0.50374
										0.27	0.462968	518.348	5.65151	512.697	11.303	524	0.0215707	0.515234
										0.27	0.462968	519.089	5.91089	513.178	11.8218	525	0.0225177	0.515234
										0.26	0.450459	519.826	6.17361	513.653	12.3472	526	0.0234738	0.525455
										0.25	0.437659	520.561	6.4394	514.121	12.8788	527	0.0244379	0.531607
										0.24	0.42456	521.292	6.70802	514.584	13.416	528	0.0254092	0.537263
										0.23	0.411156	522.021	6.97924	515.042	13.9585	529	0.0263865	0.549425
										0.23	0.411156	522.747	7.25283	515.494	14.5057	530	0.0273692	0.549425
										0.23	0.411156	523.471	7.5286	515.943	15.0572	531	0.0283563	0.549425
										0.23	0.411156	524.194	7.80635	516.387	15.6127	532	0.0293472	0.549425
										0.22	0.39744	524.914	8.08591	516.828	16.1718	533	0.0303411	0.560814
										0.22	0.39744	525.633	8.36711	517.266	16.7342	534	0.0313375	0.560814
										0.21	0.383405	526.35	8.64981	517.7	17.2996	535	0.0323357	0.565414
										0.2	0.369043	527.066	8.93387	518.132	17.8677	536	0.0333353	0.569397
										0.2	0.369043	527.781	9.21917	518.562	18.4383	537	0.0343358	0.569397
										0.19	0.354346	528.494	9.50558	518.989	19.0112	538	0.0353367	0.574867
										0.19	0.354346	529.207	9.79301	519.414	19.586	539	0.0363377	0.574867
										0.19	0.354346	529.919	10.0814	519.837	20.1627	540	0.0373384	0.574867
										0.17	0.323917	530.629	10.3705	520.259	20.7411	541	0.0383384	0.579867
										0.17	0.323917	531.34	10.6605	520.679	21.3209	542	0.0393375	0.579867
										0.17	0.323917	532.049	10.9511	521.098	21.9022	543	0.0403355	0.579867
										0.16	0.308169	532.758	11.2423	521.515	22.4846	544	0.041332	0.583023
										0.16	0.308169	533.466	11.5341	521.932	23.0682	545	0.0423269	0.583023
										0.15	0.292054	534.174	11.8264	522.347	23.6527	546	0.04332	0.58547
										0.15	0.292054	534.881	12.1191	522.762	24.2382	547	0.0443111	0.58547
										0.15	0.292054	535.588	12.4122	523.176	24.8245	548	0.0453001	0.58547
										0.14	0.275564	536.294	12.7057	523.589	25.4115	549	0.0462869	0.588288
										0.14	0.275564	537	12.9996	524.001	25.9992	550	0.0472712	0.588288
										0.14	0.275564	537.706	13.2937	524.413	26.5875	551	0.0482531	0.588288
										0.14	0.275564	538.412	13.5881	524.824	27.1763	552	0.0492324	0.588288
										0.14	0.275564	539.117	13.8828	525.234	27.7656	553	0.0502091	0.588288
										0.13	0.25869	539.822	14.1777	525.645	28.3554	554	0.051183	0.590157
										0.13	0.25869	540.527	14.4728	526.054	28.9455	555	0.0521541	0.590157
										0.13	0.25869	541.232	14.768	526.464	29.536	556	0.0531224	0.590157
										0.12	0.241422	541.937	15.0634	526.873	30.1269	557	0.0540878	0.591398
										0.12	0.241422	542.641	15.359	527.282	30.718	558	0.0550502	0.591398
										0.12	0.241422	543.345	15.6547	527.691	31.3094	559	0.0560097	0.591398
										0.12	0.241422	544.049	15.9505	528.099	31.901	560	0.0569662	0.591398
										0.12	0.241422	544.754	16.2464	528.507	32.4929	561	0.0579196	0.591398
										0.11	0.223753	545.458	16.5425	528.915	33.0849	562	0.05887	0.592383
										0.11	0.223753	546.161	16.8386	529.323	33.6772	563	0.0598174	0.592383
										0.11	0.223753	546.865	17.1348	529.73	34.2696	564	0.0607616	0.592383
										0.11	0.223753	547.569	17.431	530.138	34.8621	565	0.0617028	0.592383
										0.11	0.223753	548.273	17.7274	530.545	35.4547	566	0.0626409	0.592383
										0.1	0.205672	548.976	18.0238	530.952	36.0475	567	0.0635759	0.593028
										0.1	0.205672	549.68	18.3202	531.36	36.6404	568	0.0645077	0.593028
										0.1	0.205672	550.383	18.6167	531.767	37.2334	569	0.0654365	0.593028
										0.1	0.205672	551.087	18.9132	532.174	37.8265	570	0.0663622	0.593028
										0.1	0.205672	551.79	19.2098	532.58	38.4196	571	0.0672848	0.593028
										0.1	0.205672	552.494	19.5064	532.987	39.0128	572	0.0682042	0.593028
										0.09	0.187169	553.197	19.8031	533.394	39.6061	573	0.0691206	0.593409
										0.09	0.187169	553.9	20.0997	533.801	40.1995	574	0.0700339	0.593409
										0.09	0.187169	554.604	20.3964	534.207	40.7929	575	0.0709441	0.593409
										0.09	0.187169	555.307	20.6932	534.614	41.3863	576	0.0718513	0.593409
										0.09	0.187169	556.01	20.9899	535.02	41.9798	577	0.0727554	0.593409
										0.08	0.168236	556.713	21.2867	535.427	42.5734	578	0.0736564	0.593759
										0.08	0.168236	557.417	21.5835	535.833	43.167	579	0.0745544	0.593759
										0.08	0.168236	558.12	21.8803	536.239	43.7606	580	0.0754493	0.593759
										0.08	0.168236	558.823	22.1771	536.646	44.3543	581	0.0763413	0.593759
										0.08	0.168236	559.526	22.474	537.052	44.948	582	0.0772302	0.593759
										0.08	0.168236	560.229	22.7708	537.458	45.5417	583	0.0781161	0.593759
										0.08	0.168236	560.932	23.0677	537.865	46.1354	584	0.078999	0.593759
										0.08	0.168236	561.635	23.3646	538.271	46.7292	585	0.079879	0.593759
										0.08	0.168236	562.339	23.6615	538.677	47.323	586	0.080756	0.593759
										0.08	0.168236	563.042	23.9584	539.083	47.9168	587	0.08163	0.593759
										0.08	0.168236	563.745	24.2553	539.489	48.5107	588	0.0825011	0.593759
										0.08	0.168236	564.448	24.5523	539.895	49.1045	589	0.0833693	0.593759
										0.08	0.168236	565.151	24.8492	540.302	49.6984	590	0.0842345	0.593759
										0.08	0.168236	565.854	25.1461	540.708	50.2923	591	0.0850969	0.593759
										0.07	0.148862	566.557	25.4431	541.114	50.8862	592	0.0859564	0.593944
										0.07	0.148862	567.26	25.7401	541.52	51.4801	593	0.086813	0.593944
										0.07	0.148862	567.963	26.037	541.926	52.074	594	0.0876667	0.593944
										0.07	0.148862	568.666	26.334	542.332	52.668	595	0.0885176	0.593944
										0.07	0.148862	569.369	26.631	542.738	53.262	596	0.0893657	0.593944
										0.07	0.148862	570.072	26.928	543.144	53.8559	597	0.0902109	0.593944
										0.06	0.129036	570.775	27.225	543.55	54.4499	598	0.0910534	0.59404
										0.06	0.129036	571.478	27.522	543.956	55.0439	599	0.091893	0.59404
										0.06	0.129036	572.181	27.819	544.362	55.6379	600	0.0927299	0.59404
										0.06	0.129036	572.884	28.116	544.768	56.232	601	0.093564	0.59404
										0.06	0.129036	573.587	28.413	545.174	56.826	602	0.0943953	0.59404
										0.06	0.129036	574.29	28.71	545.58	57.42	603	0.0952239	0.59404
										0.06	0.129036	574.993	29.007	545.986	58.0141	604	0.0960498	0.59404
										0.06	0.129036	575.696	29.3041	546.392	58.6082	605	0.096873	0.59404
										0.06	0.129036	576.399	29.6011	546.798	59.2022	606	0.0976935	0.59404
										0.06	0.129036	577.102	29.8982	547.204	59.7963	607	0.0985112	0.59404
										0.05	0.108749	577.805	30.1952	547.61	60.3904	608	0.0993263	0.594134
										0.05	0.108749	578.508	30.4923	548.015	60.9845	609	0.100139	0.594134
										0.05	0.108749	579.211	30.7893	548.421	61.5786	610	0.100949	0.594134
										0.05	0.108749	579.914	31.0864	548.827	62.1727	611	0.101756	0.594134
										0.05	0.108749	580.617	31.3834	549.233	62.7669	612	0.10256	0.594134
										0.05	0.108749	581.319	31.6805	549.639	63.361	613	0.103362	0.594134
										0.05	0.108749	582.022	31.9776	550.045	63.9552	614	0.104162	0.594134
										0.05	0.108749	582.725	32.2747	550.451	64.5493	615	0.104958	0.594134
										0.05	0.108749	583.428	32.5717	550.857	65.1435	616	0.105752	0.594134
										0.05	0.108749	584.131	32.8688	551.262	65.7376	617	0.106544	0.594134

## Sheet: Distinct Peptide Level Data
Distinct Peptide Level Data		Confidence Threshold	Forward	Reverse	Correct	Incorrect	Total	Global FDR	q-value		Fit Confidence Threshold	Fit Forward	Fit Reverse	Fit Correct	Fit Incorrect	Fit Total	Fit Global FDR	Fit Local FDR
		1	1688	0	1688	0	1688	0	0		1	0.99999	1.0287e-05	0.999979	2.05739e-05	1	2.05739e-05	2.12333e-05
		0.9999	1978	0	1978	0	1978	0	0		1	1.99998	2.0574e-05	1.99996	4.11479e-05	2	2.0574e-05	2.12333e-05
		0.9998	2281	0	2281	0	2281	0	0		1	2.99997	3.0861e-05	2.99994	6.17221e-05	3	2.0574e-05	2.12333e-05
		0.9997	2370	0	2370	0	2370	0	0		1	3.99996	4.11482e-05	3.99992	8.22963e-05	4	2.05741e-05	2.12333e-05
		0.9996	2433	0	2433	0	2433	0	0		1	4.99995	5.14353e-05	4.9999	0.000102871	5	2.05741e-05	2.12333e-05
		0.9995	2480	0	2480	0	2480	0	0		1	5.99994	6.17226e-05	5.99988	0.000123445	6	2.05742e-05	2.12333e-05
		0.9994	2557	0	2557	0	2557	0	0		1	6.99993	7.20099e-05	6.99986	0.00014402	7	2.05743e-05	2.12333e-05
		0.9993	2612	0	2612	0	2612	0	0		1	7.99992	8.22972e-05	7.99984	0.000164594	8	2.05743e-05	2.12333e-05
		0.9992	2644	0	2644	0	2644	0	0		1	8.99991	9.25847e-05	8.99981	0.000185169	9	2.05744e-05	2.12333e-05
		0.9991	2675	0	2675	0	2675	0	0		1	9.9999	0.000102872	9.99979	0.000205744	10	2.05744e-05	2.12333e-05
		0.999	2702	0	2702	0	2702	0	0		1	10.9999	0.00011316	10.9998	0.000226319	11	2.05745e-05	2.12333e-05
		0.9989	2726	0	2726	0	2726	0	0		1	11.9999	0.000123447	11.9998	0.000246895	12	2.05745e-05	2.12333e-05
		0.9988	2748	0	2748	0	2748	0	0		1	12.9999	0.000133735	12.9997	0.00026747	13	2.05746e-05	2.12333e-05
		0.9987	2759	0	2759	0	2759	0	0		1	13.9999	0.000144023	13.9997	0.000288045	14	2.05747e-05	2.12333e-05
		0.9986	2777	0	2777	0	2777	0	0		1	14.9998	0.00015431	14.9997	0.000308621	15	2.05747e-05	2.12333e-05
		0.9985	2799	0	2799	0	2799	0	0		1	15.9998	0.000164598	15.9997	0.000329197	16	2.05748e-05	2.12333e-05
		0.9984	2817	0	2817	0	2817	0	0		1	16.9998	0.000174886	16.9997	0.000349772	17	2.05748e-05	2.12333e-05
		0.9983	2827	0	2827	0	2827	0	0		1	17.9998	0.000185174	17.9996	0.000370348	18	2.05749e-05	2.12333e-05
		0.9982	2837	0	2837	0	2837	0	0		1	18.9998	0.000195462	18.9996	0.000390924	19	2.0575e-05	2.12333e-05
		0.9981	2850	0	2850	0	2850	0	0		1	19.9998	0.00020575	19.9996	0.0004115	20	2.0575e-05	2.12333e-05
		0.998	2862	0	2862	0	2862	0	0		1	20.9998	0.000216038	20.9996	0.000432077	21	2.05751e-05	2.12333e-05
		0.9979	2872	0	2872	0	2872	0	0		1	21.9998	0.000226326	21.9995	0.000452653	22	2.05751e-05	2.12333e-05
		0.9978	2884	0	2884	0	2884	0	0		1	22.9998	0.000236615	22.9995	0.000473229	23	2.05752e-05	2.12333e-05
		0.9977	2894	0	2894	0	2894	0	0		1	23.9998	0.000246903	23.9995	0.000493806	24	2.05753e-05	2.12333e-05
		0.9976	2904	0	2904	0	2904	0	0		1	24.9997	0.000257191	24.9995	0.000514383	25	2.05753e-05	2.12333e-05
		0.9975	2918	0	2918	0	2918	0	0		1	25.9997	0.00026748	25.9995	0.00053496	26	2.05754e-05	2.12333e-05
		0.9974	2929	0	2929	0	2929	0	0		1	26.9997	0.000277768	26.9994	0.000555537	27	2.05754e-05	2.12333e-05
		0.9973	2939	0	2939	0	2939	0	0		1	27.9997	0.000288057	27.9994	0.000576114	28	2.05755e-05	2.12333e-05
		0.9972	2946	0	2946	0	2946	0	0		1	28.9997	0.000298345	28.9994	0.000596691	29	2.05755e-05	2.12333e-05
		0.9971	2953	0	2953	0	2953	0	0		1	29.9997	0.000308634	29.9994	0.000617268	30	2.05756e-05	2.12333e-05
		0.997	2961	0	2961	0	2961	0	0		1	30.9997	0.000318923	30.9994	0.000637846	31	2.05757e-05	2.12333e-05
		0.9969	2968	0	2968	0	2968	0	0		1	31.9997	0.000329212	31.9993	0.000658423	32	2.05757e-05	2.12333e-05
		0.9968	2973	0	2973	0	2973	0	0		1	32.9997	0.0003395	32.9993	0.000679001	33	2.05758e-05	2.12333e-05
		0.9967	2982	0	2982	0	2982	0	0		1	33.9997	0.000349789	33.9993	0.000699579	34	2.05758e-05	2.12333e-05
		0.9966	2988	0	2988	0	2988	0	0		1	34.9996	0.000360078	34.9993	0.000720156	35	2.05759e-05	2.12333e-05
		0.9965	2996	0	2996	0	2996	0	0		1	35.9996	0.000370367	35.9993	0.000740734	36	2.0576e-05	2.12333e-05
		0.9964	3001	0	3001	0	3001	0	0		1	36.9996	0.000380656	36.9992	0.000761313	37	2.0576e-05	2.12333e-05
		0.9963	3005	0	3005	0	3005	0	0		1	37.9996	0.000390945	37.9992	0.000781891	38	2.05761e-05	2.12333e-05
		0.9962	3014	0	3014	0	3014	0	0		1	38.9996	0.000401235	38.9992	0.000802469	39	2.05761e-05	2.12333e-05
		0.9961	3018	0	3018	0	3018	0	0		1	39.9996	0.000411524	39.9992	0.000823048	40	2.05762e-05	2.12333e-05
		0.996	3021	0	3021	0	3021	0	0		1	40.9996	0.000421813	40.9992	0.000843626	41	2.05763e-05	2.12333e-05
		0.9959	3028	0	3028	0	3028	0	0		1	41.9996	0.000432102	41.9991	0.000864205	42	2.05763e-05	2.12333e-05
		0.9958	3034	0	3034	0	3034	0	0		1	42.9996	0.000442392	42.9991	0.000884784	43	2.05764e-05	2.12333e-05
		0.9957	3041	0	3041	0	3041	0	0		1	43.9995	0.000452681	43.9991	0.000905363	44	2.05764e-05	2.12333e-05
		0.9956	3044	0	3044	0	3044	0	0		1	44.9995	0.000462971	44.9991	0.000925942	45	2.05765e-05	2.12333e-05
		0.9955	3048	0	3048	0	3048	0	0		1	45.9995	0.000473261	45.9991	0.000946521	46	2.05765e-05	2.12333e-05
		0.9954	3053	0	3053	0	3053	0	0		1	46.9995	0.00048355	46.999	0.0009671	47	2.05766e-05	2.12333e-05
		0.9953	3055	0	3055	0	3055	0	0		1	47.9995	0.00049384	47.999	0.00098768	48	2.05767e-05	2.12333e-05
		0.9952	3061	0	3061	0	3061	0	0		1	48.9995	0.00050413	48.999	0.00100826	49	2.05767e-05	2.12333e-05
		0.9951	3065	0	3065	0	3065	0	0		1	49.9995	0.000514419	49.999	0.00102884	50	2.05768e-05	2.12333e-05
		0.995	3071	0	3071	0	3071	0	0		1	50.9995	0.000524709	50.999	0.00104942	51	2.05768e-05	2.12333e-05
		0.9949	3077	0	3077	0	3077	0	0		1	51.9995	0.000534999	51.9989	0.00107	52	2.05769e-05	2.12333e-05
		0.9948	3081	0	3081	0	3081	0	0		1	52.9995	0.000545289	52.9989	0.00109058	53	2.0577e-05	2.12333e-05
		0.9947	3084	0	3084	0	3084	0	0		1	53.9994	0.000555579	53.9989	0.00111116	54	2.0577e-05	2.12333e-05
		0.9946	3086	0	3086	0	3086	0	0		1	54.9994	0.000565869	54.9989	0.00113174	55	2.05771e-05	2.12333e-05
		0.9945	3090	0	3090	0	3090	0	0		1	55.9994	0.00057616	55.9988	0.00115232	56	2.05771e-05	2.12333e-05
		0.9944	3097	0	3097	0	3097	0	0		1	56.9994	0.00058645	56.9988	0.0011729	57	2.05772e-05	2.12333e-05
		0.9943	3101	0	3101	0	3101	0	0		1	57.9994	0.00059674	57.9988	0.00119348	58	2.05772e-05	2.12333e-05
		0.9942	3104	0	3104	0	3104	0	0		1	58.9994	0.000607031	58.9988	0.00121406	59	2.05773e-05	2.12333e-05
		0.9941	3110	0	3110	0	3110	0	0		1	59.9994	0.000617321	59.9988	0.00123464	60	2.05774e-05	2.12333e-05
		0.994	3112	0	3112	0	3112	0	0		1	60.9994	0.000627611	60.9987	0.00125522	61	2.05774e-05	2.12333e-05
		0.9939	3117	0	3117	0	3117	0	0		1	61.9994	0.000637902	61.9987	0.0012758	62	2.05775e-05	2.12333e-05
		0.9938	3121	0	3121	0	3121	0	0		1	62.9994	0.000648193	62.9987	0.00129639	63	2.05775e-05	2.12333e-05
		0.9937	3122	0	3122	0	3122	0	0		1	63.9993	0.000658483	63.9987	0.00131697	64	2.05776e-05	2.12333e-05
		0.9936	3125	0	3125	0	3125	0	0		1	64.9993	0.000668774	64.9987	0.00133755	65	2.05777e-05	2.12333e-05
		0.9935	3128	0	3128	0	3128	0	0		1	65.9993	0.000679065	65.9986	0.00135813	66	2.05777e-05	2.12333e-05
		0.9934	3133	0	3133	0	3133	0	0		1	66.9993	0.000689356	66.9986	0.00137871	67	2.05778e-05	2.12333e-05
		0.9933	3138	0	3138	0	3138	0	0		1	67.9993	0.000699646	67.9986	0.00139929	68	2.05778e-05	2.12333e-05
		0.9932	3140	0	3140	0	3140	0	0		1	68.9993	0.000709937	68.9986	0.00141987	69	2.05779e-05	2.12333e-05
		0.9931	3143	0	3143	0	3143	0	0		1	69.9993	0.000720228	69.9986	0.00144046	70	2.0578e-05	2.12333e-05
		0.993	3144	0	3144	0	3144	0	0		1	70.9993	0.000730519	70.9985	0.00146104	71	2.0578e-05	2.12333e-05
		0.9929	3147	0	3147	0	3147	0	0		1	71.9993	0.000740811	71.9985	0.00148162	72	2.05781e-05	2.12333e-05
		0.9928	3151	0	3151	0	3151	0	0		1	72.9992	0.000751102	72.9985	0.0015022	73	2.05781e-05	2.12333e-05
		0.9927	3156	0	3156	0	3156	0	0		1	73.9992	0.000761393	73.9985	0.00152279	74	2.05782e-05	2.12333e-05
		0.9926	3160	0	3160	0	3160	0	0		1	74.9992	0.000771684	74.9985	0.00154337	75	2.05782e-05	2.12333e-05
		0.9925	3162	0	3162	0	3162	0	0		1	75.9992	0.000781976	75.9984	0.00156395	76	2.05783e-05	2.12333e-05
		0.9924	3167	0	3167	0	3167	0	0		1	76.9992	0.000792267	76.9984	0.00158453	77	2.05784e-05	2.12333e-05
		0.9923	3171	0	3171	0	3171	0	0		1	77.9992	0.000802559	77.9984	0.00160512	78	2.05784e-05	2.12333e-05
		0.9922	3174	0	3174	0	3174	0	0		1	78.9992	0.00081285	78.9984	0.0016257	79	2.05785e-05	2.12333e-05
		0.9921	3176	0	3176	0	3176	0	0		1	79.9992	0.000823142	79.9984	0.00164628	80	2.05785e-05	2.12333e-05
		0.992	3179	0	3179	0	3179	0	0		1	80.9992	0.000833433	80.9983	0.00166687	81	2.05786e-05	2.12333e-05
		0.9919	3181	0	3181	0	3181	0	0		1	81.9992	0.000843725	81.9983	0.00168745	82	2.05787e-05	2.12333e-05
		0.9918	3185	0	3185	0	3185	0	0		1	82.9991	0.000854017	82.9983	0.00170803	83	2.05787e-05	2.12333e-05
		0.9916	3187	0	3187	0	3187	0	0		1	83.9991	0.000864309	83.9983	0.00172862	84	2.05788e-05	2.12333e-05
		0.9915	3189	0	3189	0	3189	0	0		1	84.9991	0.0008746	84.9983	0.0017492	85	2.05788e-05	2.12333e-05
		0.9914	3191	0	3191	0	3191	0	0		1	85.9991	0.000884892	85.9982	0.00176978	86	2.05789e-05	2.12333e-05
		0.9913	3194	0	3194	0	3194	0	0		1	86.9991	0.000895184	86.9982	0.00179037	87	2.0579e-05	2.12333e-05
		0.9911	3198	0	3198	0	3198	0	0		1	87.9991	0.000905476	87.9982	0.00181095	88	2.0579e-05	2.12333e-05
		0.991	3204	0	3204	0	3204	0	0		1	88.9991	0.000915769	88.9982	0.00183154	89	2.05791e-05	2.12333e-05
		0.9909	3209	0	3209	0	3209	0	0		1	89.9991	0.000926061	89.9981	0.00185212	90	2.05791e-05	2.12333e-05
		0.9908	3214	0	3214	0	3214	0	0		1	90.9991	0.000936353	90.9981	0.00187271	91	2.05792e-05	2.12333e-05
		0.9907	3215	0	3215	0	3215	0	0		1	91.9991	0.000946645	91.9981	0.00189329	92	2.05792e-05	2.12333e-05
		0.9906	3216	0	3216	0	3216	0	0		1	92.999	0.000956938	92.9981	0.00191388	93	2.05793e-05	2.12333e-05
		0.9905	3217	0	3217	0	3217	0	0		1	93.999	0.00096723	93.9981	0.00193446	94	2.05794e-05	2.12333e-05
		0.9904	3221	0	3221	0	3221	0	0		1	94.999	0.000977523	94.998	0.00195505	95	2.05794e-05	2.12333e-05
		0.9903	3223	0	3223	0	3223	0	0		1	95.999	0.000987815	95.998	0.00197563	96	2.05795e-05	2.12333e-05
		0.9902	3226	0	3226	0	3226	0	0		1	96.999	0.000998108	96.998	0.00199622	97	2.05795e-05	2.12333e-05
		0.9901	3229	0	3229	0	3229	0	0		1	97.999	0.0010084	97.998	0.0020168	98	2.05796e-05	2.12333e-05
		0.99	3233	0	3233	0	3233	0	0		1	98.999	0.00101869	98.998	0.00203739	99	2.05797e-05	2.12333e-05
		0.9899	3234	0	3234	0	3234	0	0		1	99.999	0.00102899	99.9979	0.00205797	100	2.05797e-05	2.12333e-05
		0.9898	3235	0	3235	0	3235	0	0		1	100.999	0.00103928	100.998	0.00207856	101	2.05798e-05	2.12333e-05
		0.9897	3239	0	3239	0	3239	0	0		1	101.999	0.00104957	101.998	0.00209914	102	2.05798e-05	2.12333e-05
		0.9896	3241	0	3241	0	3241	0	0		1	102.999	0.00105986	102.998	0.00211973	103	2.05799e-05	2.12333e-05
		0.9895	3244	0	3244	0	3244	0	0		1	103.999	0.00107016	103.998	0.00214031	104	2.058e-05	2.12333e-05
		0.9894	3245	0	3245	0	3245	0	0		1	104.999	0.00108045	104.998	0.0021609	105	2.058e-05	2.12333e-05
		0.9893	3246	0	3246	0	3246	0	0		1	105.999	0.00109074	105.998	0.00218149	106	2.05801e-05	2.12333e-05
		0.9892	3248	0	3248	0	3248	0	0		1	106.999	0.00110104	106.998	0.00220207	107	2.05801e-05	2.12333e-05
		0.9891	3249	0	3249	0	3249	0	0		1	107.999	0.00111133	107.998	0.00222266	108	2.05802e-05	2.12333e-05
		0.989	3250	0	3250	0	3250	0	0		1	108.999	0.00112162	108.998	0.00224325	109	2.05802e-05	2.12333e-05
		0.9889	3254	0	3254	0	3254	0	0		1	109.999	0.00113192	109.998	0.00226383	110	2.05803e-05	2.12333e-05
		0.9888	3255	0	3255	0	3255	0	0		1	110.999	0.00114221	110.998	0.00228442	111	2.05804e-05	2.12333e-05
		0.9887	3257	0	3257	0	3257	0	0		1	111.999	0.0011525	111.998	0.00230501	112	2.05804e-05	2.12333e-05
		0.9885	3261	0	3261	0	3261	0	0		1	112.999	0.0011628	112.998	0.00232559	113	2.05805e-05	2.12333e-05
		0.9884	3263	0	3263	0	3263	0	0		1	113.999	0.00117309	113.998	0.00234618	114	2.05805e-05	2.12333e-05
		0.9882	3265	0	3265	0	3265	0	0		1	114.999	0.00118338	114.998	0.00236677	115	2.05806e-05	2.12333e-05
		0.9881	3266	0	3266	0	3266	0	0		1	115.999	0.00119368	115.998	0.00238736	116	2.05807e-05	2.12333e-05
		0.988	3267	0	3267	0	3267	0	0		1	116.999	0.00120397	116.998	0.00240794	117	2.05807e-05	2.12333e-05
		0.9879	3269	0	3269	0	3269	0	0		1	117.999	0.00121427	117.998	0.00242853	118	2.05808e-05	2.12333e-05
		0.9878	3273	0	3273	0	3273	0	0		1	118.999	0.00122456	118.998	0.00244912	119	2.05808e-05	2.12333e-05
		0.9877	3274	0	3274	0	3274	0	0		1	119.999	0.00123485	119.998	0.00246971	120	2.05809e-05	2.12333e-05
		0.9876	3276	0	3276	0	3276	0	0		1	120.999	0.00124515	120.998	0.00249029	121	2.0581e-05	2.12333e-05
		0.9874	3277	0	3277	0	3277	0	0		1	121.999	0.00125544	121.997	0.00251088	122	2.0581e-05	2.12333e-05
		0.9873	3280	0	3280	0	3280	0	0		1	122.999	0.00126574	122.997	0.00253147	123	2.05811e-05	2.12333e-05
		0.9872	3281	0	3281	0	3281	0	0		1	123.999	0.00127603	123.997	0.00255206	124	2.05811e-05	2.12333e-05
		0.9871	3283	0	3283	0	3283	0	0		1	124.999	0.00128632	124.997	0.00257265	125	2.05812e-05	2.12333e-05
		0.987	3285	0	3285	0	3285	0	0		1	125.999	0.00129662	125.997	0.00259324	126	2.05812e-05	2.12333e-05
		0.9869	3285	1	3284	2	3286	0.000608643	0.000603318		1	126.999	0.00130691	126.997	0.00261383	127	2.05813e-05	2.12333e-05
		0.9868	3286	1	3285	2	3287	0.000608458	0.000603318		1	127.999	0.00131721	127.997	0.00263441	128	2.05814e-05	2.12333e-05
		0.9866	3287	1	3286	2	3288	0.000608273	0.000603318		1	128.999	0.0013275	128.997	0.002655	129	2.05814e-05	2.12333e-05
		0.9865	3289	1	3288	2	3290	0.000607903	0.000603318		1	129.999	0.0013378	129.997	0.00267559	130	2.05815e-05	2.12333e-05
		0.9864	3292	1	3291	2	3293	0.000607349	0.000603318		1	130.999	0.00134809	130.997	0.00269618	131	2.05815e-05	2.12333e-05
		0.9863	3294	1	3293	2	3295	0.00060698	0.000603318		1	131.999	0.00135839	131.997	0.00271677	132	2.05816e-05	2.12333e-05
		0.9861	3295	1	3294	2	3296	0.000606796	0.000603318		1	132.999	0.00136868	132.997	0.00273736	133	2.05817e-05	2.12333e-05
		0.986	3299	1	3298	2	3300	0.000606061	0.000603318		1	133.999	0.00137897	133.997	0.00275795	134	2.05817e-05	2.12333e-05
		0.9859	3300	1	3299	2	3301	0.000605877	0.000603318		1	134.999	0.00138927	134.997	0.00277854	135	2.05818e-05	2.12333e-05
		0.9858	3301	1	3300	2	3302	0.000605694	0.000603318		1	135.999	0.00139956	135.997	0.00279913	136	2.05818e-05	2.12333e-05
		0.9857	3305	1	3304	2	3306	0.000604961	0.000603318		1	136.999	0.00140986	136.997	0.00281972	137	2.05819e-05	2.12333e-05
		0.9855	3306	1	3305	2	3307	0.000604778	0.000603318		1	137.999	0.00142015	137.997	0.00284031	138	2.05819e-05	2.12333e-05
		0.9854	3308	1	3307	2	3309	0.000604412	0.000603318		1	138.999	0.00143045	138.997	0.0028609	139	2.0582e-05	2.12333e-05
		0.9853	3310	1	3309	2	3311	0.000604047	0.000603318		1	139.999	0.00144074	139.997	0.00288149	140	2.05821e-05	2.12333e-05
		0.9851	3312	1	3311	2	3313	0.000603682	0.000603318		1	140.999	0.00145104	140.997	0.00290208	141	2.05821e-05	2.12333e-05
		0.985	3314	1	3313	2	3315	0.000603318	0.000603318		1	141.999	0.00146134	141.997	0.00292267	142	2.05822e-05	2.12333e-05
		0.9849	3315	2	3313	4	3317	0.00120591	0.00118871		1	142.999	0.00147163	142.997	0.00294326	143	2.05822e-05	2.12333e-05
		0.9846	3318	2	3316	4	3320	0.00120482	0.00118871		1	143.999	0.00148193	143.997	0.00296385	144	2.05823e-05	2.12333e-05
		0.9845	3321	2	3319	4	3323	0.00120373	0.00118871		1	144.999	0.00149222	144.997	0.00298444	145	2.05824e-05	2.12333e-05
		0.9843	3322	2	3320	4	3324	0.00120337	0.00118871		1	145.998	0.00150252	145.997	0.00300503	146	2.05824e-05	2.12333e-05
		0.9842	3323	2	3321	4	3325	0.00120301	0.00118871		1	146.998	0.00151281	146.997	0.00302562	147	2.05825e-05	2.12333e-05
		0.9841	3324	2	3322	4	3326	0.00120265	0.00118871		1	147.998	0.00152311	147.997	0.00304622	148	2.05825e-05	2.12333e-05
		0.9839	3325	2	3323	4	3327	0.00120228	0.00118871		1	148.998	0.0015334	148.997	0.00306681	149	2.05826e-05	2.12333e-05
		0.9838	3327	2	3325	4	3329	0.00120156	0.00118871		1	149.998	0.0015437	149.997	0.0030874	150	2.05827e-05	2.12333e-05
		0.9835	3328	2	3326	4	3330	0.0012012	0.00118871		1	150.998	0.00155399	150.997	0.00310799	151	2.05827e-05	2.12333e-05
		0.9834	3329	2	3327	4	3331	0.00120084	0.00118871		1	151.998	0.00156429	151.997	0.00312858	152	2.05828e-05	2.12333e-05
		0.9831	3331	2	3329	4	3333	0.00120012	0.00118871		1	152.998	0.00157459	152.997	0.00314917	153	2.05828e-05	2.12333e-05
		0.983	3332	2	3330	4	3334	0.00119976	0.00118871		1	153.998	0.00158488	153.997	0.00316976	154	2.05829e-05	2.12333e-05
		0.9828	3333	2	3331	4	3335	0.0011994	0.00118871		1	154.998	0.00159518	154.997	0.00319036	155	2.05829e-05	2.12333e-05
		0.9827	3334	2	3332	4	3336	0.00119904	0.00118871		1	155.998	0.00160547	155.997	0.00321095	156	2.0583e-05	2.12333e-05
		0.9826	3336	2	3334	4	3338	0.00119832	0.00118871		1	156.998	0.00161577	156.997	0.00323154	157	2.05831e-05	2.12333e-05
		0.9824	3337	2	3335	4	3339	0.00119796	0.00118871		1	157.998	0.00162607	157.997	0.00325213	158	2.05831e-05	2.12333e-05
		0.9823	3338	2	3336	4	3340	0.0011976	0.00118871		1	158.998	0.00163636	158.997	0.00327273	159	2.05832e-05	2.12333e-05
		0.9822	3339	2	3337	4	3341	0.00119725	0.00118871		1	159.998	0.00164666	159.997	0.00329332	160	2.05832e-05	2.12333e-05
		0.9821	3340	2	3338	4	3342	0.00119689	0.00118871		1	160.998	0.00165696	160.997	0.00331391	161	2.05833e-05	2.12333e-05
		0.982	3341	2	3339	4	3343	0.00119653	0.00118871		1	161.998	0.00166725	161.997	0.0033345	162	2.05834e-05	2.12333e-05
		0.9819	3342	2	3340	4	3344	0.00119617	0.00118871		1	162.998	0.00167755	162.997	0.0033551	163	2.05834e-05	2.12333e-05
		0.9818	3343	2	3341	4	3345	0.00119581	0.00118871		1	163.998	0.00168785	163.997	0.00337569	164	2.05835e-05	2.12333e-05
		0.9817	3344	2	3342	4	3346	0.00119546	0.00118871		1	164.998	0.00169814	164.997	0.00339628	165	2.05835e-05	2.12333e-05
		0.9815	3345	2	3343	4	3347	0.0011951	0.00118871		1	165.998	0.00170844	165.997	0.00341688	166	2.05836e-05	2.12333e-05
		0.9813	3346	2	3344	4	3348	0.00119474	0.00118871		1	166.998	0.00171874	166.997	0.00343747	167	2.05837e-05	2.12333e-05
		0.9812	3347	2	3345	4	3349	0.00119439	0.00118871		1	167.998	0.00172903	167.997	0.00345806	168	2.05837e-05	2.12333e-05
		0.9811	3348	2	3346	4	3350	0.00119403	0.00118871		1	168.998	0.00173933	168.997	0.00347866	169	2.05838e-05	2.12333e-05
		0.9808	3350	2	3348	4	3352	0.00119332	0.00118871		1	169.998	0.00174963	169.997	0.00349925	170	2.05838e-05	2.12333e-05
		0.9804	3351	2	3349	4	3353	0.00119296	0.00118871		1	170.998	0.00175992	170.996	0.00351984	171	2.05839e-05	2.12333e-05
		0.9803	3352	2	3350	4	3354	0.00119261	0.00118871		1	171.998	0.00177022	171.996	0.00354044	172	2.05839e-05	2.12333e-05
		0.9802	3353	2	3351	4	3355	0.00119225	0.00118871		1	172.998	0.00178052	172.996	0.00356103	173	2.0584e-05	2.12333e-05
		0.98	3354	2	3352	4	3356	0.0011919	0.00118871		1	173.998	0.00179081	173.996	0.00358163	174	2.05841e-05	2.12333e-05
		0.9799	3355	2	3353	4	3357	0.00119154	0.00118871		1	174.998	0.00180111	174.996	0.00360222	175	2.05841e-05	2.12333e-05
		0.9798	3358	2	3356	4	3360	0.00119048	0.00118871		1	175.998	0.00181141	175.996	0.00362282	176	2.05842e-05	2.12333e-05
		0.9796	3359	2	3357	4	3361	0.00119012	0.00118871		1	176.998	0.00182171	176.996	0.00364341	177	2.05842e-05	2.12333e-05
		0.9795	3360	2	3358	4	3362	0.00118977	0.00118871		1	177.998	0.001832	177.996	0.00366401	178	2.05843e-05	2.12333e-05
		0.9793	3361	2	3359	4	3363	0.00118941	0.00118871		1	178.998	0.0018423	178.996	0.0036846	179	2.05844e-05	2.12333e-05
		0.979	3362	2	3360	4	3364	0.00118906	0.00118871		1	179.998	0.0018526	179.996	0.0037052	180	2.05844e-05	2.12333e-05
		0.9787	3363	2	3361	4	3365	0.00118871	0.00118871		1	180.998	0.0018629	180.996	0.00372579	181	2.05845e-05	2.12333e-05
		0.9786	3363	3	3360	6	3366	0.00178253	0.00176056		1	181.998	0.00187319	181.996	0.00374639	182	2.05845e-05	2.12333e-05
		0.9785	3365	3	3362	6	3368	0.00178147	0.00176056		1	182.998	0.00188349	182.996	0.00376698	183	2.05846e-05	2.12333e-05
		0.9783	3366	3	3363	6	3369	0.00178094	0.00176056		1	183.998	0.00189379	183.996	0.00378758	184	2.05847e-05	2.12333e-05
		0.9781	3369	3	3366	6	3372	0.00177936	0.00176056		1	184.998	0.00190409	184.996	0.00380817	185	2.05847e-05	2.12333e-05
		0.978	3371	3	3368	6	3374	0.0017783	0.00176056		1	185.998	0.00191438	185.996	0.00382877	186	2.05848e-05	2.12333e-05
		0.9776	3373	3	3370	6	3376	0.00177725	0.00176056		1	186.998	0.00192468	186.996	0.00384936	187	2.05848e-05	2.12333e-05
		0.9775	3374	3	3371	6	3377	0.00177672	0.00176056		1	187.998	0.00193498	187.996	0.00386996	188	2.05849e-05	2.12333e-05
		0.9774	3376	3	3373	6	3379	0.00177567	0.00176056		1	188.998	0.00194528	188.996	0.00389055	189	2.05849e-05	2.12333e-05
		0.9773	3377	3	3374	6	3380	0.00177515	0.00176056		1	189.998	0.00195558	189.996	0.00391115	190	2.0585e-05	2.12333e-05
		0.9772	3379	3	3376	6	3382	0.0017741	0.00176056		1	190.998	0.00196587	190.996	0.00393175	191	2.05851e-05	2.12333e-05
		0.9771	3381	3	3378	6	3384	0.00177305	0.00176056		1	191.998	0.00197617	191.996	0.00395234	192	2.05851e-05	2.12333e-05
		0.977	3382	3	3379	6	3385	0.00177253	0.00176056		1	192.998	0.00198647	192.996	0.00397294	193	2.05852e-05	2.12333e-05
		0.9769	3384	3	3381	6	3387	0.00177148	0.00176056		1	193.998	0.00199677	193.996	0.00399354	194	2.05852e-05	2.12333e-05
		0.9767	3385	3	3382	6	3388	0.00177096	0.00176056		1	194.998	0.00200707	194.996	0.00401413	195	2.05853e-05	2.12333e-05
		0.9766	3386	3	3383	6	3389	0.00177043	0.00176056		1	195.998	0.00201737	195.996	0.00403473	196	2.05854e-05	2.12333e-05
		0.9765	3387	3	3384	6	3390	0.00176991	0.00176056		1	196.998	0.00202766	196.996	0.00405533	197	2.05854e-05	2.12333e-05
		0.9763	3388	3	3385	6	3391	0.00176939	0.00176056		1	197.998	0.00203796	197.996	0.00407592	198	2.05855e-05	2.12333e-05
		0.9761	3389	3	3386	6	3392	0.00176887	0.00176056		1	198.998	0.00204826	198.996	0.00409652	199	2.05855e-05	2.12333e-05
		0.9758	3390	3	3387	6	3393	0.00176835	0.00176056		1	199.998	0.00205856	199.996	0.00411712	200	2.05856e-05	2.12333e-05
		0.9754	3391	3	3388	6	3394	0.00176783	0.00176056		1	200.998	0.00206886	200.996	0.00413772	201	2.05857e-05	2.12333e-05
		0.9751	3392	3	3389	6	3395	0.0017673	0.00176056		1	201.998	0.00207916	201.996	0.00415831	202	2.05857e-05	2.12333e-05
		0.975	3393	3	3390	6	3396	0.00176678	0.00176056		1	202.998	0.00208946	202.996	0.00417891	203	2.05858e-05	2.12333e-05
		0.9748	3394	3	3391	6	3397	0.00176626	0.00176056		1	203.998	0.00209975	203.996	0.00419951	204	2.05858e-05	2.12333e-05
		0.9746	3398	3	3395	6	3401	0.00176419	0.00176056		1	204.998	0.00211005	204.996	0.00422011	205	2.05859e-05	2.12333e-05
		0.9744	3399	3	3396	6	3402	0.00176367	0.00176056		1	205.998	0.00212035	205.996	0.0042407	206	2.05859e-05	2.12333e-05
		0.9743	3400	3	3397	6	3403	0.00176315	0.00176056		1	206.998	0.00213065	206.996	0.0042613	207	2.0586e-05	2.12333e-05
		0.9742	3401	3	3398	6	3404	0.00176263	0.00176056		1	207.998	0.00214095	207.996	0.0042819	208	2.05861e-05	2.12333e-05
		0.9741	3403	3	3400	6	3406	0.0017616	0.00176056		1	208.998	0.00215125	208.996	0.0043025	209	2.05861e-05	2.12333e-05
		0.9738	3404	3	3401	6	3407	0.00176108	0.00176056		1	209.998	0.00216155	209.996	0.0043231	210	2.05862e-05	2.12333e-05
		0.9736	3405	3	3402	6	3408	0.00176056	0.00176056		1	210.998	0.00217185	210.996	0.0043437	211	2.05862e-05	2.12333e-05
		0.9734	3405	4	3401	8	3409	0.00234673	0.0023344		1	211.998	0.00218215	211.996	0.0043643	212	2.05863e-05	2.12333e-05
		0.9733	3406	4	3402	8	3410	0.00234604	0.0023344		1	212.998	0.00219245	212.996	0.00438489	213	2.05864e-05	2.12333e-05
		0.9732	3407	4	3403	8	3411	0.00234535	0.0023344		1	213.998	0.00220275	213.996	0.00440549	214	2.05864e-05	2.12333e-05
		0.9731	3408	4	3404	8	3412	0.00234467	0.0023344		1	214.998	0.00221305	214.996	0.00442609	215	2.05865e-05	2.12333e-05
		0.973	3410	4	3406	8	3414	0.00234329	0.0023344		1	215.998	0.00222335	215.996	0.00444669	216	2.05865e-05	2.12333e-05
		0.9727	3411	4	3407	8	3415	0.00234261	0.0023344		1	216.998	0.00223365	216.996	0.00446729	217	2.05866e-05	2.12333e-05
		0.9724	3412	4	3408	8	3416	0.00234192	0.0023344		1	217.998	0.00224394	217.996	0.00448789	218	2.05867e-05	2.12333e-05
		0.9723	3414	4	3410	8	3418	0.00234055	0.0023344		1	218.998	0.00225424	218.995	0.00450849	219	2.05867e-05	2.12333e-05
		0.9718	3415	4	3411	8	3419	0.00233987	0.0023344		1	219.998	0.00226454	219.995	0.00452909	220	2.05868e-05	2.12333e-05
		0.9716	3418	4	3414	8	3422	0.00233781	0.0023344		1	220.998	0.00227484	220.995	0.00454969	221	2.05868e-05	2.12333e-05
		0.9712	3420	4	3416	8	3424	0.00233645	0.0023344		1	221.998	0.00228514	221.995	0.00457029	222	2.05869e-05	2.12333e-05
		0.9711	3421	4	3417	8	3425	0.00233577	0.0023344		1	222.998	0.00229544	222.995	0.00459089	223	2.05869e-05	2.12333e-05
		0.971	3422	4	3418	8	3426	0.00233508	0.0023344		1	223.998	0.00230574	223.995	0.00461149	224	2.0587e-05	2.12333e-05
		0.9709	3423	4	3419	8	3427	0.0023344	0.0023344		1	224.998	0.00231604	224.995	0.00463209	225	2.05871e-05	2.12333e-05
		0.9708	3423	5	3418	10	3428	0.00291715	0.00290529		1	225.998	0.00232634	225.995	0.00465269	226	2.05871e-05	2.12333e-05
		0.9707	3424	5	3419	10	3429	0.0029163	0.00290529		1	226.998	0.00233664	226.995	0.00467329	227	2.05872e-05	2.12333e-05
		0.9706	3427	5	3422	10	3432	0.00291375	0.00290529		1	227.998	0.00234695	227.995	0.00469389	228	2.05872e-05	2.12333e-05
		0.9703	3428	5	3423	10	3433	0.0029129	0.00290529		1	228.998	0.00235725	228.995	0.00471449	229	2.05873e-05	2.12333e-05
		0.9702	3429	5	3424	10	3434	0.00291206	0.00290529		1	229.998	0.00236755	229.995	0.00473509	230	2.05874e-05	2.12333e-05
		0.97	3431	5	3426	10	3436	0.00291036	0.00290529		1	230.998	0.00237785	230.995	0.00475569	231	2.05874e-05	2.12333e-05
		0.9699	3433	5	3428	10	3438	0.00290867	0.00290529		1	231.998	0.00238815	231.995	0.00477629	232	2.05875e-05	2.12333e-05
		0.9697	3434	5	3429	10	3439	0.00290782	0.00290529		1	232.998	0.00239845	232.995	0.0047969	233	2.05875e-05	2.12333e-05
		0.9695	3435	5	3430	10	3440	0.00290698	0.00290529		1	233.998	0.00240875	233.995	0.0048175	234	2.05876e-05	2.12333e-05
		0.9694	3436	5	3431	10	3441	0.00290613	0.00290529		1	234.998	0.00241905	234.995	0.0048381	235	2.05877e-05	2.12333e-05
		0.9693	3437	5	3432	10	3442	0.00290529	0.00290529		1	235.998	0.00242935	235.995	0.0048587	236	2.05877e-05	2.12333e-05
		0.9691	3437	6	3431	12	3443	0.00348533	0.00346921		1	236.998	0.00243965	236.995	0.0048793	237	2.05878e-05	2.12333e-05
		0.969	3439	6	3433	12	3445	0.00348331	0.00346921		1	237.998	0.00244995	237.995	0.0048999	238	2.05878e-05	2.12333e-05
		0.9689	3441	6	3435	12	3447	0.00348129	0.00346921		1	238.998	0.00246025	238.995	0.0049205	239	2.05879e-05	2.12333e-05
		0.9687	3443	6	3437	12	3449	0.00347927	0.00346921		1	239.998	0.00247055	239.995	0.00494111	240	2.05879e-05	2.12333e-05
		0.9686	3444	6	3438	12	3450	0.00347826	0.00346921		1	240.998	0.00248085	240.995	0.00496171	241	2.0588e-05	2.12333e-05
		0.9683	3445	6	3439	12	3451	0.00347725	0.00346921		1	241.998	0.00249116	241.995	0.00498231	242	2.05881e-05	2.12333e-05
		0.9681	3446	6	3440	12	3452	0.00347625	0.00346921		1	242.997	0.00250146	242.995	0.00500291	243	2.05881e-05	2.12333e-05
		0.9677	3448	6	3442	12	3454	0.00347423	0.00346921		1	243.997	0.00251176	243.995	0.00502352	244	2.05882e-05	2.12333e-05
		0.9673	3449	6	3443	12	3455	0.00347323	0.00346921		1	244.997	0.00252206	244.995	0.00504412	245	2.05882e-05	2.12333e-05
		0.9672	3450	6	3444	12	3456	0.00347222	0.00346921		1	245.997	0.00253236	245.995	0.00506472	246	2.05883e-05	2.12333e-05
		0.9667	3451	6	3445	12	3457	0.00347122	0.00346921		1	246.997	0.00254266	246.995	0.00508532	247	2.05884e-05	2.12333e-05
		0.9666	3452	6	3446	12	3458	0.00347021	0.00346921		1	247.997	0.00255296	247.995	0.00510593	248	2.05884e-05	2.12333e-05
		0.9663	3453	6	3447	12	3459	0.00346921	0.00346921		1	248.997	0.00256326	248.995	0.00512653	249	2.05885e-05	2.12333e-05
		0.966	3453	7	3446	14	3460	0.00404624	0.0040253		1	249.997	0.00257357	249.995	0.00514713	250	2.05885e-05	2.12333e-05
		0.9659	3454	7	3447	14	3461	0.00404507	0.0040253		1	250.997	0.00258387	250.995	0.00516774	251	2.05886e-05	2.12333e-05
		0.9656	3456	7	3449	14	3463	0.00404274	0.0040253		1	251.997	0.00259417	251.995	0.00518834	252	2.05887e-05	2.12333e-05
		0.9654	3458	7	3451	14	3465	0.0040404	0.0040253		1	252.997	0.00260447	252.995	0.00520894	253	2.05887e-05	2.12333e-05
		0.9652	3459	7	3452	14	3466	0.00403924	0.0040253		1	253.997	0.00261477	253.995	0.00522955	254	2.05888e-05	2.12333e-05
		0.965	3460	7	3453	14	3467	0.00403807	0.0040253		1	254.997	0.00262508	254.995	0.00525015	255	2.05888e-05	2.12333e-05
		0.9645	3461	7	3454	14	3468	0.00403691	0.0040253		1	255.997	0.00263538	255.995	0.00527075	256	2.05889e-05	2.12333e-05
		0.9643	3463	7	3456	14	3470	0.00403458	0.0040253		1	256.997	0.00264568	256.995	0.00529136	257	2.05889e-05	2.12333e-05
		0.9642	3464	7	3457	14	3471	0.00403342	0.0040253		1	257.997	0.00265598	257.995	0.00531196	258	2.0589e-05	2.12333e-05
		0.9638	3465	7	3458	14	3472	0.00403226	0.0040253		1	258.997	0.00266628	258.995	0.00533257	259	2.05891e-05	2.12333e-05
		0.9637	3467	7	3460	14	3474	0.00402994	0.0040253		1	259.997	0.00267659	259.995	0.00535317	260	2.05891e-05	2.12333e-05
		0.9633	3468	7	3461	14	3475	0.00402878	0.0040253		1	260.997	0.00268689	260.995	0.00537378	261	2.05892e-05	2.12333e-05
		0.9632	3469	7	3462	14	3476	0.00402762	0.0040253		1	261.997	0.00269719	261.995	0.00539438	262	2.05892e-05	2.12333e-05
		0.9631	3470	7	3463	14	3477	0.00402646	0.0040253		1	262.997	0.00270749	262.995	0.00541499	263	2.05893e-05	2.12333e-05
		0.963	3471	7	3464	14	3478	0.0040253	0.0040253		1	263.997	0.00271779	263.995	0.00543559	264	2.05894e-05	2.12333e-05
		0.9626	3471	8	3463	16	3479	0.00459902	0.00455581		1	264.997	0.0027281	264.995	0.00545619	265	2.05894e-05	2.12333e-05
		0.9622	3472	8	3464	16	3480	0.0045977	0.00455581		1	265.997	0.0027384	265.995	0.0054768	266	2.05895e-05	2.12333e-05
		0.9621	3473	8	3465	16	3481	0.00459638	0.00455581		1	266.997	0.0027487	266.995	0.00549741	267	2.05895e-05	2.12333e-05
		0.9618	3474	8	3466	16	3482	0.00459506	0.00455581		1	267.997	0.00275901	267.994	0.00551801	268	2.05896e-05	2.12333e-05
		0.9617	3475	8	3467	16	3483	0.00459374	0.00455581		1	268.997	0.00276931	268.994	0.00553862	269	2.05896e-05	2.12333e-05
		0.9614	3476	8	3468	16	3484	0.00459242	0.00455581		1	269.997	0.00277961	269.994	0.00555922	270	2.05897e-05	2.12333e-05
		0.9611	3478	8	3470	16	3486	0.00458979	0.00455581		1	270.997	0.00278991	270.994	0.00557983	271	2.05898e-05	2.12333e-05
		0.9607	3479	8	3471	16	3487	0.00458847	0.00455581		1	271.997	0.00280022	271.994	0.00560043	272	2.05898e-05	2.12333e-05
		0.9606	3480	8	3472	16	3488	0.00458716	0.00455581		1	272.997	0.00281052	272.994	0.00562104	273	2.05899e-05	2.12333e-05
		0.9602	3481	8	3473	16	3489	0.00458584	0.00455581		1	273.997	0.00282082	273.994	0.00564164	274	2.05899e-05	2.12333e-05
		0.9596	3482	8	3474	16	3490	0.00458453	0.00455581		1	274.997	0.00283113	274.994	0.00566225	275	2.059e-05	2.12333e-05
		0.9591	3483	8	3475	16	3491	0.00458321	0.00455581		1	275.997	0.00284143	275.994	0.00568286	276	2.05901e-05	2.12333e-05
		0.959	3485	8	3477	16	3493	0.00458059	0.00455581		1	276.997	0.00285173	276.994	0.00570346	277	2.05901e-05	2.12333e-05
		0.9587	3486	8	3478	16	3494	0.00457928	0.00455581		1	277.997	0.00286203	277.994	0.00572407	278	2.05902e-05	2.12333e-05
		0.958	3487	8	3479	16	3495	0.00457797	0.00455581		1	278.997	0.00287234	278.994	0.00574468	279	2.05902e-05	2.12333e-05
		0.9572	3488	8	3480	16	3496	0.00457666	0.00455581		1	279.997	0.00288264	279.994	0.00576528	280	2.05903e-05	2.12333e-05
		0.9571	3490	8	3482	16	3498	0.00457404	0.00455581		1	280.997	0.00289294	280.994	0.00578589	281	2.05904e-05	2.12333e-05
		0.9567	3492	8	3484	16	3500	0.00457143	0.00455581		1	281.997	0.00290325	281.994	0.0058065	282	2.05904e-05	2.12333e-05
		0.9564	3493	8	3485	16	3501	0.00457012	0.00455581		1	282.997	0.00291355	282.994	0.0058271	283	2.05905e-05	2.12333e-05
		0.9563	3494	8	3486	16	3502	0.00456882	0.00455581		1	283.997	0.00292386	283.994	0.00584771	284	2.05905e-05	2.12333e-05
		0.9562	3495	8	3487	16	3503	0.00456751	0.00455581		1	284.997	0.00293416	284.994	0.00586832	285	2.05906e-05	2.12333e-05
		0.9561	3497	8	3489	16	3505	0.00456491	0.00455581		1	285.997	0.00294446	285.994	0.00588893	286	2.05906e-05	2.12333e-05
		0.9555	3498	8	3490	16	3506	0.00456361	0.00455581		1	286.997	0.00295477	286.994	0.00590953	287	2.05907e-05	2.12333e-05
		0.9554	3499	8	3491	16	3507	0.0045623	0.00455581		1	287.997	0.00296507	287.994	0.00593014	288	2.05908e-05	2.12333e-05
		0.9553	3500	8	3492	16	3508	0.004561	0.00455581		1	288.997	0.00297537	288.994	0.00595075	289	2.05908e-05	2.12333e-05
		0.9551	3501	8	3493	16	3509	0.0045597	0.00455581		1	289.997	0.00298568	289.994	0.00597136	290	2.05909e-05	2.12333e-05
		0.9543	3502	8	3494	16	3510	0.0045584	0.00455581		1	290.997	0.00299598	290.994	0.00599196	291	2.05909e-05	2.12333e-05
		0.9542	3503	8	3495	16	3511	0.00455711	0.00455581		1	291.997	0.00300629	291.994	0.00601257	292	2.0591e-05	2.12333e-05
		0.954	3504	8	3496	16	3512	0.00455581	0.00455581		1	292.997	0.00301659	292.994	0.00603318	293	2.05911e-05	2.12333e-05
		0.9531	3504	9	3495	18	3513	0.00512383	0.00509482		1	293.997	0.00302689	293.994	0.00605379	294	2.05911e-05	2.12333e-05
		0.9527	3505	9	3496	18	3514	0.00512237	0.00509482		1	294.997	0.0030372	294.994	0.0060744	295	2.05912e-05	2.12333e-05
		0.9524	3506	9	3497	18	3515	0.00512091	0.00509482		1	295.997	0.0030475	295.994	0.00609501	296	2.05912e-05	2.12333e-05
		0.9523	3507	9	3498	18	3516	0.00511945	0.00509482		1	296.997	0.00305781	296.994	0.00611561	297	2.05913e-05	2.12333e-05
		0.9518	3509	9	3500	18	3518	0.00511654	0.00509482		1	297.997	0.00306811	297.994	0.00613622	298	2.05914e-05	2.12333e-05
		0.9515	3511	9	3502	18	3520	0.00511364	0.00509482		1	298.997	0.00307842	298.994	0.00615683	299	2.05914e-05	2.12333e-05
		0.9505	3513	9	3504	18	3522	0.00511073	0.00509482		1	299.997	0.00308872	299.994	0.00617744	300	2.05915e-05	2.12333e-05
		0.9503	3514	9	3505	18	3523	0.00510928	0.00509482		1	300.997	0.00309903	300.994	0.00619805	301	2.05915e-05	2.12333e-05
		0.9501	3515	9	3506	18	3524	0.00510783	0.00509482		1	301.997	0.00310933	301.994	0.00621866	302	2.05916e-05	2.12333e-05
		0.95	3516	9	3507	18	3525	0.00510638	0.00509482		1	302.997	0.00311963	302.994	0.00623927	303	2.05916e-05	2.12333e-05
		0.9495	3517	9	3508	18	3526	0.00510493	0.00509482		1	303.997	0.00312994	303.994	0.00625988	304	2.05917e-05	2.12333e-05
		0.9493	3518	9	3509	18	3527	0.00510349	0.00509482		1	304.997	0.00314024	304.994	0.00628049	305	2.05918e-05	2.12333e-05
		0.9492	3520	9	3511	18	3529	0.0051006	0.00509482		1	305.997	0.00315055	305.994	0.0063011	306	2.05918e-05	2.12333e-05
		0.9488	3521	9	3512	18	3530	0.00509915	0.00509482		1	306.997	0.00316085	306.994	0.00632171	307	2.05919e-05	2.12333e-05
		0.9484	3522	9	3513	18	3531	0.00509771	0.00509482		1	307.997	0.00317116	307.994	0.00634232	308	2.05919e-05	2.12333e-05
		0.9482	3523	9	3514	18	3532	0.00509626	0.00509482		1	308.997	0.00318146	308.994	0.00636293	309	2.0592e-05	2.12333e-05
		0.9469	3524	9	3515	18	3533	0.00509482	0.00509482		1	309.997	0.00319177	309.994	0.00638354	310	2.05921e-05	2.12333e-05
		0.9457	3524	10	3514	20	3534	0.00565931	0.00564493		1	310.997	0.00320207	310.994	0.00640415	311	2.05921e-05	2.12333e-05
		0.9452	3525	10	3515	20	3535	0.00565771	0.00564493		1	311.997	0.00321238	311.994	0.00642476	312	2.05922e-05	2.12333e-05
		0.945	3526	10	3516	20	3536	0.00565611	0.00564493		1	312.997	0.00322269	312.994	0.00644537	313	2.05922e-05	2.12333e-05
		0.9449	3527	10	3517	20	3537	0.00565451	0.00564493		1	313.997	0.00323299	313.994	0.00646598	314	2.05923e-05	2.12333e-05
		0.9448	3528	10	3518	20	3538	0.00565291	0.00564493		1	314.997	0.0032433	314.994	0.00648659	315	2.05924e-05	2.12333e-05
		0.9446	3531	10	3521	20	3541	0.00564812	0.00564493		1	315.997	0.0032536	315.993	0.0065072	316	2.05924e-05	2.12333e-05
		0.9444	3532	10	3522	20	3542	0.00564653	0.00564493		1	316.997	0.00326391	316.993	0.00652781	317	2.05925e-05	2.12333e-05
		0.9442	3533	10	3523	20	3543	0.00564493	0.00564493		1	317.997	0.00327421	317.993	0.00654842	318	2.05925e-05	2.12333e-05
		0.9439	3533	11	3522	22	3544	0.00620767	0.00617457		1	318.997	0.00328452	318.993	0.00656904	319	2.05926e-05	2.12333e-05
		0.9436	3535	11	3524	22	3546	0.00620417	0.00617457		1	319.997	0.00329482	319.993	0.00658965	320	2.05926e-05	2.12333e-05
		0.9434	3537	11	3526	22	3548	0.00620068	0.00617457		1	320.997	0.00330513	320.993	0.00661026	321	2.05927e-05	2.12333e-05
		0.9429	3538	11	3527	22	3549	0.00619893	0.00617457		1	321.997	0.00331544	321.993	0.00663087	322	2.05928e-05	2.12333e-05
		0.9427	3539	11	3528	22	3550	0.00619718	0.00617457		1	322.997	0.00332574	322.993	0.00665148	323	2.05928e-05	2.12333e-05
		0.9423	3540	11	3529	22	3551	0.00619544	0.00617457		1	323.997	0.00333605	323.993	0.00667209	324	2.05929e-05	2.12333e-05
		0.9418	3541	11	3530	22	3552	0.00619369	0.00617457		1	324.997	0.00334635	324.993	0.00669271	325	2.05929e-05	2.12333e-05
		0.9417	3542	11	3531	22	3553	0.00619195	0.00617457		1	325.997	0.00335666	325.993	0.00671332	326	2.0593e-05	2.12333e-05
		0.9412	3543	11	3532	22	3554	0.00619021	0.00617457		1	326.997	0.00336697	326.993	0.00673393	327	2.05931e-05	2.12333e-05
		0.9411	3544	11	3533	22	3555	0.00618847	0.00617457		1	327.997	0.00337727	327.993	0.00675454	328	2.05931e-05	2.12333e-05
		0.9409	3545	11	3534	22	3556	0.00618673	0.00617457		1	328.997	0.00338758	328.993	0.00677516	329	2.05932e-05	2.12333e-05
		0.9408	3546	11	3535	22	3557	0.00618499	0.00617457		1	329.997	0.00339788	329.993	0.00679577	330	2.05932e-05	2.12333e-05
		0.9407	3547	11	3536	22	3558	0.00618325	0.00617457		1	330.997	0.00340819	330.993	0.00681638	331	2.05933e-05	2.12333e-05
		0.9403	3548	11	3537	22	3559	0.00618151	0.00617457		1	331.997	0.0034185	331.993	0.00683699	332	2.05934e-05	2.12333e-05
		0.94	3550	11	3539	22	3561	0.00617804	0.00617457		1	332.997	0.0034288	332.993	0.00685761	333	2.05934e-05	2.12333e-05
		0.9399	3551	11	3540	22	3562	0.00617631	0.00617457		1	333.997	0.00343911	333.993	0.00687822	334	2.05935e-05	2.12333e-05
		0.9394	3552	11	3541	22	3563	0.00617457	0.00617457		1	334.997	0.00344942	334.993	0.00689883	335	2.05935e-05	2.12333e-05
		0.9391	3553	12	3541	24	3565	0.00673212	0.00670953		1	335.997	0.00345972	335.993	0.00691945	336	2.05936e-05	2.12333e-05
		0.9388	3554	12	3542	24	3566	0.00673023	0.00670953		1	336.997	0.00347003	336.993	0.00694006	337	2.05936e-05	2.12333e-05
		0.9386	3555	12	3543	24	3567	0.00672834	0.00670953		1	337.997	0.00348034	337.993	0.00696067	338	2.05937e-05	2.12333e-05
		0.9382	3556	12	3544	24	3568	0.00672646	0.00670953		1	338.997	0.00349064	338.993	0.00698129	339	2.05938e-05	2.12333e-05
		0.9381	3557	12	3545	24	3569	0.00672457	0.00670953		1	339.996	0.00350095	339.993	0.0070019	340	2.05938e-05	2.12333e-05
		0.9377	3558	12	3546	24	3570	0.00672269	0.00670953		1	340.996	0.00351126	340.993	0.00702251	341	2.05939e-05	2.12333e-05
		0.9371	3559	12	3547	24	3571	0.00672081	0.00670953		1	341.996	0.00352156	341.993	0.00704313	342	2.05939e-05	2.12333e-05
		0.937	3560	12	3548	24	3572	0.00671892	0.00670953		1	342.996	0.00353187	342.993	0.00706374	343	2.0594e-05	2.12333e-05
		0.9368	3561	12	3549	24	3573	0.00671704	0.00670953		1	343.996	0.00354218	343.993	0.00708436	344	2.05941e-05	2.12333e-05
		0.9365	3562	12	3550	24	3574	0.00671517	0.00670953		1	344.996	0.00355249	344.993	0.00710497	345	2.05941e-05	2.12333e-05
		0.9361	3563	12	3551	24	3575	0.00671329	0.00670953		1	345.996	0.00356279	345.993	0.00712559	346	2.05942e-05	2.12333e-05
		0.936	3564	12	3552	24	3576	0.00671141	0.00670953		1	346.996	0.0035731	346.993	0.0071462	347	2.05942e-05	2.12333e-05
		0.9353	3565	12	3553	24	3577	0.00670953	0.00670953		1	347.996	0.00358341	347.993	0.00716681	348	2.05943e-05	2.12333e-05
		0.9342	3565	13	3552	26	3578	0.00726663	0.00724638		1	348.996	0.00359371	348.993	0.00718743	349	2.05944e-05	2.12333e-05
		0.9339	3566	13	3553	26	3579	0.0072646	0.00724638		1	349.996	0.00360402	349.993	0.00720804	350	2.05944e-05	2.12333e-05
		0.9335	3568	13	3555	26	3581	0.00726054	0.00724638		1	350.996	0.00361433	350.993	0.00722866	351	2.05945e-05	2.12333e-05
		0.9334	3569	13	3556	26	3582	0.00725851	0.00724638		1	351.996	0.00362464	351.993	0.00724927	352	2.05945e-05	2.12333e-05
		0.9333	3571	13	3558	26	3584	0.00725446	0.00724638		1	352.996	0.00363494	352.993	0.00726989	353	2.05946e-05	2.12333e-05
		0.9328	3572	13	3559	26	3585	0.00725244	0.00724638		1	353.996	0.00364525	353.993	0.00729051	354	2.05946e-05	2.12333e-05
		0.9326	3573	13	3560	26	3586	0.00725042	0.00724638		1	354.996	0.00365556	354.993	0.00731112	355	2.05947e-05	2.12333e-05
		0.9324	3574	13	3561	26	3587	0.0072484	0.00724638		1	355.996	0.00366587	355.993	0.00733174	356	2.05948e-05	2.12333e-05
		0.9319	3575	13	3562	26	3588	0.00724638	0.00724638		1	356.996	0.00367618	356.993	0.00735235	357	2.05948e-05	2.12333e-05
		0.9317	3575	14	3561	28	3589	0.00780162	0.00779944		1	357.996	0.00368648	357.993	0.00737297	358	2.05949e-05	2.12333e-05
		0.9314	3576	14	3562	28	3590	0.00779944	0.00779944		1	358.996	0.00369679	358.993	0.00739358	359	2.05949e-05	2.12333e-05
		0.9305	3576	15	3561	30	3591	0.00835422	0.00833333		1	359.996	0.0037071	359.993	0.0074142	360	2.0595e-05	2.12333e-05
		0.9304	3577	15	3562	30	3592	0.00835189	0.00833333		1	360.996	0.00371741	360.993	0.00743482	361	2.05951e-05	2.12333e-05
		0.9302	3578	15	3563	30	3593	0.00834957	0.00833333		1	361.996	0.00372772	361.993	0.00745543	362	2.05951e-05	2.12333e-05
		0.9299	3579	15	3564	30	3594	0.00834725	0.00833333		1	362.996	0.00373802	362.993	0.00747605	363	2.05952e-05	2.12333e-05
		0.9298	3580	15	3565	30	3595	0.00834492	0.00833333		1	363.996	0.00374833	363.993	0.00749667	364	2.05952e-05	2.12333e-05
		0.9283	3582	15	3567	30	3597	0.00834028	0.00833333		1	364.996	0.00375864	364.992	0.00751728	365	2.05953e-05	2.12333e-05
		0.9281	3583	15	3568	30	3598	0.00833797	0.00833333		1	365.996	0.00376895	365.992	0.0075379	366	2.05954e-05	2.12333e-05
		0.9279	3584	15	3569	30	3599	0.00833565	0.00833333		1	366.996	0.00377926	366.992	0.00755852	367	2.05954e-05	2.12333e-05
		0.9272	3585	15	3570	30	3600	0.00833333	0.00833333		1	367.996	0.00378957	367.992	0.00757913	368	2.05955e-05	2.12333e-05
		0.927	3586	16	3570	32	3602	0.00888395	0.00875274		1	368.996	0.00379988	368.992	0.00759975	369	2.05955e-05	2.12333e-05
		0.926	3587	16	3571	32	3603	0.00888149	0.00875274		1	369.996	0.00381018	369.992	0.00762037	370	2.05956e-05	2.12333e-05
		0.9258	3588	16	3572	32	3604	0.00887902	0.00875274		1	370.996	0.00382049	370.992	0.00764099	371	2.05956e-05	2.12333e-05
		0.925	3589	16	3573	32	3605	0.00887656	0.00875274		1	371.996	0.0038308	371.992	0.0076616	372	2.05957e-05	2.12333e-05
		0.9247	3590	16	3574	32	3606	0.0088741	0.00875274		1	372.996	0.00384111	372.992	0.00768222	373	2.05958e-05	2.12333e-05
		0.9246	3591	16	3575	32	3607	0.00887164	0.00875274		1	373.996	0.00385142	373.992	0.00770284	374	2.05958e-05	2.12333e-05
		0.924	3592	16	3576	32	3608	0.00886918	0.00875274		1	374.996	0.00386173	374.992	0.00772346	375	2.05959e-05	2.12333e-05
		0.9239	3593	16	3577	32	3609	0.00886672	0.00875274		1	375.996	0.00387204	375.992	0.00774407	376	2.05959e-05	2.12333e-05
		0.9232	3594	16	3578	32	3610	0.00886427	0.00875274		1	376.996	0.00388235	376.992	0.00776469	377	2.0596e-05	2.12333e-05
		0.9227	3595	16	3579	32	3611	0.00886181	0.00875274		1	377.996	0.00389266	377.992	0.00778531	378	2.05961e-05	2.12333e-05
		0.9226	3596	16	3580	32	3612	0.00885936	0.00875274		1	378.996	0.00390296	378.992	0.00780593	379	2.05961e-05	2.12333e-05
		0.922	3597	16	3581	32	3613	0.00885691	0.00875274		1	379.996	0.00391327	379.992	0.00782655	380	2.05962e-05	2.12333e-05
		0.9219	3598	16	3582	32	3614	0.00885445	0.00875274		1	380.996	0.00392358	380.992	0.00784717	381	2.05962e-05	2.12333e-05
		0.9216	3599	16	3583	32	3615	0.00885201	0.00875274		1	381.996	0.00393389	381.992	0.00786778	382	2.05963e-05	2.12333e-05
		0.9213	3600	16	3584	32	3616	0.00884956	0.00875274		1	382.996	0.0039442	382.992	0.0078884	383	2.05964e-05	2.12333e-05
		0.9205	3601	16	3585	32	3617	0.00884711	0.00875274		1	383.996	0.00395451	383.992	0.00790902	384	2.05964e-05	2.12333e-05
		0.92	3602	16	3586	32	3618	0.00884467	0.00875274		1	384.996	0.00396482	384.992	0.00792964	385	2.05965e-05	2.12333e-05
		0.9198	3604	16	3588	32	3620	0.00883978	0.00875274		1	385.996	0.00397513	385.992	0.00795026	386	2.05965e-05	2.12333e-05
		0.9184	3605	16	3589	32	3621	0.00883734	0.00875274		1	386.996	0.00398544	386.992	0.00797088	387	2.05966e-05	2.12333e-05
		0.918	3607	16	3591	32	3623	0.00883246	0.00875274		1	387.996	0.00399575	387.992	0.0079915	388	2.05966e-05	2.12333e-05
		0.9178	3608	16	3592	32	3624	0.00883002	0.00875274		1	388.996	0.00400606	388.992	0.00801212	389	2.05967e-05	2.12333e-05
		0.9169	3609	16	3593	32	3625	0.00882759	0.00875274		1	389.996	0.00401637	389.992	0.00803274	390	2.05968e-05	2.12333e-05
		0.9167	3610	16	3594	32	3626	0.00882515	0.00875274		1	390.996	0.00402668	390.992	0.00805336	391	2.05968e-05	2.12333e-05
		0.9163	3611	16	3595	32	3627	0.00882272	0.00875274		1	391.996	0.00403699	391.992	0.00807398	392	2.05969e-05	2.12333e-05
		0.9154	3612	16	3596	32	3628	0.00882029	0.00875274		1	392.996	0.0040473	392.992	0.0080946	393	2.05969e-05	2.12333e-05
		0.915	3613	16	3597	32	3629	0.00881786	0.00875274		1	393.996	0.00405761	393.992	0.00811522	394	2.0597e-05	2.12333e-05
		0.9144	3614	16	3598	32	3630	0.00881543	0.00875274		1	394.996	0.00406792	394.992	0.00813584	395	2.05971e-05	2.12333e-05
		0.9138	3615	16	3599	32	3631	0.008813	0.00875274		1	395.996	0.00407823	395.992	0.00815646	396	2.05971e-05	2.12333e-05
		0.9134	3616	16	3600	32	3632	0.00881057	0.00875274		1	396.996	0.00408854	396.992	0.00817708	397	2.05972e-05	2.12333e-05
		0.9132	3617	16	3601	32	3633	0.00880815	0.00875274		1	397.996	0.00409885	397.992	0.0081977	398	2.05972e-05	2.12333e-05
		0.9116	3618	16	3602	32	3634	0.00880572	0.00875274		1	398.996	0.00410916	398.992	0.00821832	399	2.05973e-05	2.12333e-05
		0.9112	3619	16	3603	32	3635	0.0088033	0.00875274		1	399.996	0.00411947	399.992	0.00823894	400	2.05974e-05	2.12333e-05
		0.9109	3620	16	3604	32	3636	0.00880088	0.00875274		1	400.996	0.00412978	400.992	0.00825956	401	2.05974e-05	2.12333e-05
		0.9108	3621	16	3605	32	3637	0.00879846	0.00875274		1	401.996	0.00414009	401.992	0.00828018	402	2.05975e-05	2.12333e-05
		0.9106	3622	16	3606	32	3638	0.00879604	0.00875274		1	402.996	0.0041504	402.992	0.0083008	403	2.05975e-05	2.12333e-05
		0.9104	3623	16	3607	32	3639	0.00879362	0.00875274		1	403.996	0.00416071	403.992	0.00832143	404	2.05976e-05	2.12333e-05
		0.9096	3624	16	3608	32	3640	0.00879121	0.00875274		1	404.996	0.00417102	404.992	0.00834205	405	2.05976e-05	2.12333e-05
		0.9095	3625	16	3609	32	3641	0.00878879	0.00875274		1	405.996	0.00418133	405.992	0.00836267	406	2.05977e-05	2.12333e-05
		0.9093	3627	16	3611	32	3643	0.00878397	0.00875274		1	406.996	0.00419165	406.992	0.00838329	407	2.05978e-05	2.12333e-05
		0.909	3628	16	3612	32	3644	0.00878156	0.00875274		1	407.996	0.00420196	407.992	0.00840391	408	2.05978e-05	2.12333e-05
		0.9084	3629	16	3613	32	3645	0.00877915	0.00875274		1	408.996	0.00421227	408.992	0.00842453	409	2.05979e-05	2.12333e-05
		0.9081	3630	16	3614	32	3646	0.00877674	0.00875274		1	409.996	0.00422258	409.992	0.00844516	410	2.05979e-05	2.12333e-05
		0.908	3631	16	3615	32	3647	0.00877434	0.00875274		1	410.996	0.00423289	410.992	0.00846578	411	2.0598e-05	2.12333e-05
		0.9077	3632	16	3616	32	3648	0.00877193	0.00875274		1	411.996	0.0042432	411.992	0.0084864	412	2.05981e-05	2.12333e-05
		0.9072	3633	16	3617	32	3649	0.00876953	0.00875274		1	412.996	0.00425351	412.991	0.00850702	413	2.05981e-05	2.12333e-05
		0.9069	3634	16	3618	32	3650	0.00876712	0.00875274		1	413.996	0.00426382	413.991	0.00852765	414	2.05982e-05	2.12333e-05
		0.9067	3635	16	3619	32	3651	0.00876472	0.00875274		1	414.996	0.00427413	414.991	0.00854827	415	2.05982e-05	2.12333e-05
		0.9066	3637	16	3621	32	3653	0.00875992	0.00875274		1	415.996	0.00428445	415.991	0.00856889	416	2.05983e-05	2.12333e-05
		0.906	3638	16	3622	32	3654	0.00875753	0.00875274		1	416.996	0.00429476	416.991	0.00858951	417	2.05984e-05	2.12333e-05
		0.9056	3639	16	3623	32	3655	0.00875513	0.00875274		1	417.996	0.00430507	417.991	0.00861014	418	2.05984e-05	2.12333e-05
		0.9053	3640	16	3624	32	3656	0.00875274	0.00875274		1	418.996	0.00431538	418.991	0.00863076	419	2.05985e-05	2.12333e-05
		0.9044	3640	17	3623	34	3657	0.00929724	0.00928708		1	419.996	0.00432569	419.991	0.00865138	420	2.05985e-05	2.12333e-05
		0.904	3641	17	3624	34	3658	0.0092947	0.00928708		1	420.996	0.004336	420.991	0.00867201	421	2.05986e-05	2.12333e-05
		0.9039	3643	17	3626	34	3660	0.00928962	0.00928708		1	421.996	0.00434631	421.991	0.00869263	422	2.05986e-05	2.12333e-05
		0.9035	3644	17	3627	34	3661	0.00928708	0.00928708		1	422.996	0.00435663	422.991	0.00871325	423	2.05987e-05	2.12333e-05
		0.9033	3645	18	3627	36	3663	0.00982801	0.00979059		1	423.996	0.00436694	423.991	0.00873388	424	2.05988e-05	2.12333e-05
		0.9025	3646	18	3628	36	3664	0.00982533	0.00979059		1	424.996	0.00437725	424.991	0.0087545	425	2.05988e-05	2.12333e-05
		0.9019	3647	18	3629	36	3665	0.00982265	0.00979059		1	425.996	0.00438756	425.991	0.00877512	426	2.05989e-05	2.12333e-05
		0.9009	3648	18	3630	36	3666	0.00981997	0.00979059		1	426.996	0.00439787	426.991	0.00879575	427	2.05989e-05	2.12333e-05
		0.9007	3649	18	3631	36	3667	0.00981729	0.00979059		1	427.996	0.00440819	427.991	0.00881637	428	2.0599e-05	2.12333e-05
		0.8996	3650	18	3632	36	3668	0.00981461	0.00979059		1	428.996	0.0044185	428.991	0.008837	429	2.05991e-05	2.12333e-05
		0.8995	3651	18	3633	36	3669	0.00981194	0.00979059		1	429.996	0.00442881	429.991	0.00885762	430	2.05991e-05	2.12333e-05
		0.8992	3652	18	3634	36	3670	0.00980926	0.00979059		1	430.996	0.00443912	430.991	0.00887825	431	2.05992e-05	2.12333e-05
		0.8983	3653	18	3635	36	3671	0.00980659	0.00979059		1	431.996	0.00444944	431.991	0.00889887	432	2.05992e-05	2.12333e-05
		0.8973	3654	18	3636	36	3672	0.00980392	0.00979059		1	432.996	0.00445975	432.991	0.00891949	433	2.05993e-05	2.12333e-05
		0.8972	3655	18	3637	36	3673	0.00980125	0.00979059		1	433.996	0.00447006	433.991	0.00894012	434	2.05994e-05	2.12333e-05
		0.8971	3656	18	3638	36	3674	0.00979858	0.00979059		1	434.996	0.00448037	434.991	0.00896074	435	2.05994e-05	2.12333e-05
		0.8966	3657	18	3639	36	3675	0.00979592	0.00979059		1	435.996	0.00449068	435.991	0.00898137	436	2.05995e-05	2.12333e-05
		0.8956	3658	18	3640	36	3676	0.00979325	0.00979059		1	436.995	0.004501	436.991	0.00900199	437	2.05995e-05	2.12333e-05
		0.8951	3659	18	3641	36	3677	0.00979059	0.00979059		1	437.995	0.00451131	437.991	0.00902262	438	2.05996e-05	2.12333e-05
		0.8939	3659	19	3640	38	3678	0.0103317	0.0103317		1	438.995	0.00452162	438.991	0.00904325	439	2.05996e-05	2.12333e-05
		0.8938	3659	20	3639	40	3679	0.0108725	0.0108196		1	439.995	0.00453194	439.991	0.00906387	440	2.05997e-05	2.12333e-05
		0.893	3660	20	3640	40	3680	0.0108696	0.0108196		1	440.995	0.00454225	440.991	0.0090845	441	2.05998e-05	2.12333e-05
		0.8922	3661	20	3641	40	3681	0.0108666	0.0108196		1	441.995	0.00455256	441.991	0.00910512	442	2.05998e-05	2.12333e-05
		0.8914	3662	20	3642	40	3682	0.0108637	0.0108196		1	442.995	0.00456287	442.991	0.00912575	443	2.05999e-05	2.12333e-05
		0.8908	3663	20	3643	40	3683	0.0108607	0.0108196		1	443.995	0.00457319	443.991	0.00914637	444	2.05999e-05	2.12333e-05
		0.8902	3664	20	3644	40	3684	0.0108578	0.0108196		1	444.995	0.0045835	444.991	0.009167	445	2.06e-05	2.12333e-05
		0.89	3665	20	3645	40	3685	0.0108548	0.0108196		1	445.995	0.00459381	445.991	0.00918763	446	2.06001e-05	2.12333e-05
		0.8896	3666	20	3646	40	3686	0.0108519	0.0108196		1	446.995	0.00460413	446.991	0.00920825	447	2.06001e-05	2.12333e-05
		0.8886	3667	20	3647	40	3687	0.0108489	0.0108196		1	447.995	0.00461444	447.991	0.00922888	448	2.06002e-05	2.12333e-05
		0.8885	3668	20	3648	40	3688	0.010846	0.0108196		1	448.995	0.00462475	448.991	0.00924951	449	2.06002e-05	2.12333e-05
		0.8883	3669	20	3649	40	3689	0.010843	0.0108196		1	449.995	0.00463507	449.991	0.00927013	450	2.06003e-05	2.12333e-05
		0.888	3670	20	3650	40	3690	0.0108401	0.0108196		1	450.995	0.00464538	450.991	0.00929076	451	2.06004e-05	2.12333e-05
		0.8875	3671	20	3651	40	3691	0.0108372	0.0108196		1	451.995	0.00465569	451.991	0.00931139	452	2.06004e-05	2.12333e-05
		0.8872	3672	20	3652	40	3692	0.0108342	0.0108196		1	452.995	0.00466601	452.991	0.00933201	453	2.06005e-05	2.12333e-05
		0.8871	3673	20	3653	40	3693	0.0108313	0.0108196		1	453.995	0.00467632	453.991	0.00935264	454	2.06005e-05	2.12333e-05
		0.8859	3674	20	3654	40	3694	0.0108284	0.0108196		1	454.995	0.00468663	454.991	0.00937327	455	2.06006e-05	2.12333e-05
		0.8858	3675	20	3655	40	3695	0.0108254	0.0108196		1	455.995	0.00469695	455.991	0.0093939	456	2.06006e-05	2.12333e-05
		0.8855	3676	20	3656	40	3696	0.0108225	0.0108196		1	456.995	0.00470726	456.991	0.00941452	457	2.06007e-05	2.12333e-05
		0.8843	3677	20	3657	40	3697	0.0108196	0.0108196		1	457.995	0.00471758	457.991	0.00943515	458	2.06008e-05	2.12333e-05
		0.8836	3678	21	3657	42	3699	0.0113544	0.0113452		1	458.995	0.00472789	458.991	0.00945578	459	2.06008e-05	2.12333e-05
		0.8834	3679	21	3658	42	3700	0.0113514	0.0113452		1	459.995	0.0047382	459.991	0.00947641	460	2.06009e-05	2.12333e-05
		0.8828	3680	21	3659	42	3701	0.0113483	0.0113452		1	460.995	0.00474852	460.991	0.00949704	461	2.06009e-05	2.12333e-05
		0.8825	3681	21	3660	42	3702	0.0113452	0.0113452		1	461.995	0.00475883	461.99	0.00951766	462	2.0601e-05	2.12333e-05
		0.8814	3681	22	3659	44	3703	0.0118823	0.0118566		1	462.995	0.00476915	462.99	0.00953829	463	2.06011e-05	2.12333e-05
		0.8813	3682	22	3660	44	3704	0.011879	0.0118566		1	463.995	0.00477946	463.99	0.00955892	464	2.06011e-05	2.12333e-05
		0.8812	3683	22	3661	44	3705	0.0118758	0.0118566		1	464.995	0.00478977	464.99	0.00957955	465	2.06012e-05	2.12333e-05
		0.8794	3684	22	3662	44	3706	0.0118726	0.0118566		1	465.995	0.00480009	465.99	0.00960018	466	2.06012e-05	2.12333e-05
		0.8793	3685	22	3663	44	3707	0.0118694	0.0118566		1	466.995	0.0048104	466.99	0.00962081	467	2.06013e-05	2.12333e-05
		0.8784	3686	22	3664	44	3708	0.0118662	0.0118566		1	467.995	0.00482072	467.99	0.00964143	468	2.06014e-05	2.12333e-05
		0.8781	3687	22	3665	44	3709	0.011863	0.0118566		1	468.995	0.00483103	468.99	0.00966206	469	2.06014e-05	2.12333e-05
		0.8774	3688	22	3666	44	3710	0.0118598	0.0118566		1	469.995	0.00484135	469.99	0.00968269	470	2.06015e-05	2.12333e-05
		0.8773	3689	22	3667	44	3711	0.0118566	0.0118566		1	470.995	0.00485166	470.99	0.00970332	471	2.06015e-05	2.12333e-05
		0.8769	3689	23	3666	46	3712	0.0123922	0.0123789		1	471.995	0.00486198	471.99	0.00972395	472	2.06016e-05	2.12333e-05
		0.8757	3690	23	3667	46	3713	0.0123889	0.0123789		1	472.995	0.00487229	472.99	0.00974458	473	2.06017e-05	2.12333e-05
		0.8756	3692	23	3669	46	3715	0.0123822	0.0123789		1	473.995	0.00488261	473.99	0.00976521	474	2.06017e-05	2.12333e-05
		0.8755	3693	23	3670	46	3716	0.0123789	0.0123789		1	474.995	0.00489292	474.99	0.00978584	475	2.06018e-05	2.12333e-05
		0.875	3693	24	3669	48	3717	0.0129136	0.0128514		1	475.995	0.00490324	475.99	0.00980647	476	2.06018e-05	2.12333e-05
		0.8749	3694	24	3670	48	3718	0.0129102	0.0128514		1	476.995	0.00491355	476.99	0.0098271	477	2.06019e-05	2.12333e-05
		0.8744	3695	24	3671	48	3719	0.0129067	0.0128514		1	477.995	0.00492387	477.99	0.00984773	478	2.06019e-05	2.12333e-05
		0.8741	3696	24	3672	48	3720	0.0129032	0.0128514		1	478.995	0.00493418	478.99	0.00986836	479	2.0602e-05	2.12333e-05
		0.8733	3697	24	3673	48	3721	0.0128998	0.0128514		1	479.995	0.0049445	479.99	0.00988899	480	2.06021e-05	2.12333e-05
		0.8723	3698	24	3674	48	3722	0.0128963	0.0128514		1	480.995	0.00495481	480.99	0.00990962	481	2.06021e-05	2.12333e-05
		0.8721	3699	24	3675	48	3723	0.0128928	0.0128514		1	481.995	0.00496513	481.99	0.00993025	482	2.06022e-05	2.12333e-05
		0.8719	3700	24	3676	48	3724	0.0128894	0.0128514		1	482.995	0.00497544	482.99	0.00995088	483	2.06022e-05	2.12333e-05
		0.8718	3701	24	3677	48	3725	0.0128859	0.0128514		1	483.995	0.00498576	483.99	0.00997151	484	2.06023e-05	2.12333e-05
		0.8708	3702	24	3678	48	3726	0.0128824	0.0128514		1	484.995	0.00499607	484.99	0.00999214	485	2.06024e-05	2.12333e-05
		0.8702	3703	24	3679	48	3727	0.012879	0.0128514		1	485.995	0.00500639	485.99	0.0100128	486	2.06024e-05	2.12333e-05
		0.8695	3704	24	3680	48	3728	0.0128755	0.0128514		1	486.995	0.0050167	486.99	0.0100334	487	2.06025e-05	2.12333e-05
		0.869	3705	24	3681	48	3729	0.0128721	0.0128514		1	487.995	0.00502702	487.99	0.010054	488	2.06025e-05	2.12333e-05
		0.8687	3706	24	3682	48	3730	0.0128686	0.0128514		1	488.995	0.00503733	488.99	0.0100747	489	2.06026e-05	2.12333e-05
		0.8685	3707	24	3683	48	3731	0.0128652	0.0128514		1	489.995	0.00504765	489.99	0.0100953	490	2.06027e-05	2.12333e-05
		0.8678	3708	24	3684	48	3732	0.0128617	0.0128514		1	490.995	0.00505797	490.99	0.0101159	491	2.06027e-05	2.12333e-05
		0.8675	3709	24	3685	48	3733	0.0128583	0.0128514		1	491.995	0.00506828	491.99	0.0101366	492	2.06028e-05	2.12333e-05
		0.8668	3710	24	3686	48	3734	0.0128548	0.0128514		1	492.995	0.0050786	492.99	0.0101572	493	2.06028e-05	2.12333e-05
		0.8642	3711	24	3687	48	3735	0.0128514	0.0128514		1	493.995	0.00508891	493.99	0.0101778	494	2.06029e-05	2.12333e-05
		0.864	3711	25	3686	50	3736	0.0133833	0.0133833		1	494.995	0.00509923	494.99	0.0101985	495	2.0603e-05	2.12333e-05
		0.8639	3711	26	3685	52	3737	0.0139149	0.0138926		1	495.995	0.00510955	495.99	0.0102191	496	2.0603e-05	2.12333e-05
		0.8631	3712	26	3686	52	3738	0.0139112	0.0138926		1	496.995	0.00511986	496.99	0.0102397	497	2.06031e-05	2.12333e-05
		0.8623	3713	26	3687	52	3739	0.0139075	0.0138926		1	497.995	0.00513018	497.99	0.0102604	498	2.06031e-05	2.12333e-05
		0.8622	3714	26	3688	52	3740	0.0139037	0.0138926		1	498.995	0.0051405	498.99	0.010281	499	2.06032e-05	2.12333e-05
		0.8602	3715	26	3689	52	3741	0.0139	0.0138926		1	499.995	0.00515081	499.99	0.0103016	500	2.06032e-05	2.12333e-05
		0.8601	3716	26	3690	52	3742	0.0138963	0.0138926		1	500.995	0.00516113	500.99	0.0103223	501	2.06033e-05	2.12333e-05
		0.8593	3717	26	3691	52	3743	0.0138926	0.0138926		1	501.995	0.00517144	501.99	0.0103429	502	2.06034e-05	2.12333e-05
		0.8591	3717	27	3690	54	3744	0.0144231	0.0143923		1	502.995	0.00518176	502.99	0.0103635	503	2.06034e-05	2.12333e-05
		0.8583	3718	27	3691	54	3745	0.0144192	0.0143923		1	503.995	0.00519208	503.99	0.0103842	504	2.06035e-05	2.12333e-05
		0.857	3719	27	3692	54	3746	0.0144154	0.0143923		1	504.995	0.00520239	504.99	0.0104048	505	2.06035e-05	2.12333e-05
		0.8566	3720	27	3693	54	3747	0.0144115	0.0143923		1	505.995	0.00521271	505.99	0.0104254	506	2.06036e-05	2.12333e-05
		0.8554	3721	27	3694	54	3748	0.0144077	0.0143923		1	506.995	0.00522303	506.99	0.0104461	507	2.06037e-05	2.12333e-05
		0.8552	3722	27	3695	54	3749	0.0144038	0.0143923		1	507.995	0.00523335	507.99	0.0104667	508	2.06037e-05	2.12333e-05
		0.8548	3723	27	3696	54	3750	0.0144	0.0143923		1	508.995	0.00524366	508.99	0.0104873	509	2.06038e-05	2.12333e-05
		0.8544	3724	27	3697	54	3751	0.0143962	0.0143923		1	509.995	0.00525398	509.989	0.010508	510	2.06038e-05	2.12333e-05
		0.8534	3725	27	3698	54	3752	0.0143923	0.0143923		1	510.995	0.0052643	510.989	0.0105286	511	2.06039e-05	2.12333e-05
		0.8532	3725	28	3697	56	3753	0.0149214	0.0148699		1	511.995	0.00527461	511.989	0.0105492	512	2.0604e-05	2.12333e-05
		0.8531	3726	28	3698	56	3754	0.0149174	0.0148699		1	512.995	0.00528493	512.989	0.0105699	513	2.0604e-05	2.12333e-05
		0.853	3727	28	3699	56	3755	0.0149134	0.0148699		1	513.995	0.00529525	513.989	0.0105905	514	2.06041e-05	2.12333e-05
		0.8523	3728	28	3700	56	3756	0.0149095	0.0148699		1	514.995	0.00530557	514.989	0.0106111	515	2.06041e-05	2.12333e-05
		0.8517	3729	28	3701	56	3757	0.0149055	0.0148699		1	515.995	0.00531588	515.989	0.0106318	516	2.06042e-05	2.12333e-05
		0.8514	3730	28	3702	56	3758	0.0149015	0.0148699		1	516.995	0.0053262	516.989	0.0106524	517	2.06043e-05	2.12333e-05
		0.8512	3731	28	3703	56	3759	0.0148976	0.0148699		1	517.995	0.00533652	517.989	0.010673	518	2.06043e-05	2.12333e-05
		0.8496	3732	28	3704	56	3760	0.0148936	0.0148699		1	518.995	0.00534684	518.989	0.0106937	519	2.06044e-05	2.12333e-05
		0.8494	3734	28	3706	56	3762	0.0148857	0.0148699		1	519.995	0.00535715	519.989	0.0107143	520	2.06044e-05	2.12333e-05
		0.8486	3735	28	3707	56	3763	0.0148817	0.0148699		1	520.995	0.00536747	520.989	0.0107349	521	2.06045e-05	2.12333e-05
		0.8475	3736	28	3708	56	3764	0.0148778	0.0148699		1	521.995	0.00537779	521.989	0.0107556	522	2.06046e-05	2.12333e-05
		0.8474	3737	28	3709	56	3765	0.0148738	0.0148699		1	522.995	0.00538811	522.989	0.0107762	523	2.06046e-05	2.12333e-05
		0.8472	3738	28	3710	56	3766	0.0148699	0.0148699		1	523.995	0.00539843	523.989	0.0107969	524	2.06047e-05	2.12333e-05
		0.8462	3739	29	3710	58	3768	0.0153928	0.0153805		1	524.995	0.00540874	524.989	0.0108175	525	2.06047e-05	2.12333e-05
		0.8458	3741	29	3712	58	3770	0.0153846	0.0153805		1	525.995	0.00541906	525.989	0.0108381	526	2.06048e-05	2.12333e-05
		0.8438	3742	29	3713	58	3771	0.0153805	0.0153805		1	526.995	0.00542938	526.989	0.0108588	527	2.06049e-05	2.12333e-05
		0.8431	3742	30	3712	60	3772	0.0159067	0.0158562		1	527.995	0.0054397	527.989	0.0108794	528	2.06049e-05	2.12333e-05
		0.8421	3743	30	3713	60	3773	0.0159025	0.0158562		1	528.995	0.00545002	528.989	0.0109	529	2.0605e-05	2.12333e-05
		0.8417	3744	30	3714	60	3774	0.0158983	0.0158562		1	529.995	0.00546033	529.989	0.0109207	530	2.0605e-05	2.12333e-05
		0.8415	3745	30	3715	60	3775	0.015894	0.0158562		1	530.995	0.00547065	530.989	0.0109413	531	2.06051e-05	2.12333e-05
		0.8405	3746	30	3716	60	3776	0.0158898	0.0158562		1	531.995	0.00548097	531.989	0.0109619	532	2.06052e-05	2.12333e-05
		0.84	3747	30	3717	60	3777	0.0158856	0.0158562		1	532.995	0.00549129	532.989	0.0109826	533	2.06052e-05	2.12333e-05
		0.8399	3748	30	3718	60	3778	0.0158814	0.0158562		1	533.994	0.00550161	533.989	0.0110032	534	2.06053e-05	2.12333e-05
		0.8389	3749	30	3719	60	3779	0.0158772	0.0158562		1	534.994	0.00551193	534.989	0.0110239	535	2.06053e-05	2.12333e-05
		0.8382	3750	30	3720	60	3780	0.015873	0.0158562		1	535.994	0.00552225	535.989	0.0110445	536	2.06054e-05	2.12333e-05
		0.8376	3751	30	3721	60	3781	0.0158688	0.0158562		1	536.994	0.00553257	536.989	0.0110651	537	2.06055e-05	2.12333e-05
		0.8367	3752	30	3722	60	3782	0.0158646	0.0158562		1	537.994	0.00554288	537.989	0.0110858	538	2.06055e-05	2.12333e-05
		0.8362	3753	30	3723	60	3783	0.0158604	0.0158562		1	538.994	0.0055532	538.989	0.0111064	539	2.06056e-05	2.12333e-05
		0.8361	3754	30	3724	60	3784	0.0158562	0.0158562		1	539.994	0.00556352	539.989	0.011127	540	2.06056e-05	2.12333e-05
		0.8354	3754	31	3723	62	3785	0.0163804	0.0163287		1	540.994	0.00557384	540.989	0.0111477	541	2.06057e-05	2.12333e-05
		0.8323	3755	31	3724	62	3786	0.0163761	0.0163287		1	541.994	0.00558416	541.989	0.0111683	542	2.06058e-05	2.12333e-05
		0.8321	3756	31	3725	62	3787	0.0163718	0.0163287		1	542.994	0.00559448	542.989	0.011189	543	2.06058e-05	2.12333e-05
		0.8317	3757	31	3726	62	3788	0.0163675	0.0163287		1	543.994	0.0056048	543.989	0.0112096	544	2.06059e-05	2.12333e-05
		0.8315	3758	31	3727	62	3789	0.0163632	0.0163287		1	544.994	0.00561512	544.989	0.0112302	545	2.06059e-05	2.12333e-05
		0.8313	3759	31	3728	62	3790	0.0163588	0.0163287		1	545.994	0.00562544	545.989	0.0112509	546	2.0606e-05	2.12333e-05
		0.8305	3760	31	3729	62	3791	0.0163545	0.0163287		1	546.994	0.00563576	546.989	0.0112715	547	2.06061e-05	2.12333e-05
		0.8304	3761	31	3730	62	3792	0.0163502	0.0163287		1	547.994	0.00564608	547.989	0.0112922	548	2.06061e-05	2.12333e-05
		0.8302	3762	31	3731	62	3793	0.0163459	0.0163287		1	548.994	0.0056564	548.989	0.0113128	549	2.06062e-05	2.12333e-05
		0.8287	3763	31	3732	62	3794	0.0163416	0.0163287		1	549.994	0.00566672	549.989	0.0113334	550	2.06062e-05	2.12333e-05
		0.8269	3764	31	3733	62	3795	0.0163373	0.0163287		1	550.994	0.00567704	550.989	0.0113541	551	2.06063e-05	2.12333e-05
		0.8263	3765	31	3734	62	3796	0.016333	0.0163287		1	551.994	0.00568736	551.989	0.0113747	552	2.06064e-05	2.12333e-05
		0.8259	3766	31	3735	62	3797	0.0163287	0.0163287		1	552.994	0.00569768	552.989	0.0113954	553	2.06064e-05	2.12333e-05
		0.8257	3766	32	3734	64	3798	0.016851	0.016732		1	553.994	0.005708	553.989	0.011416	554	2.06065e-05	2.12333e-05
		0.8255	3768	32	3736	64	3800	0.0168421	0.016732		1	554.994	0.00571832	554.989	0.0114366	555	2.06066e-05	2.12333e-05
		0.8247	3769	32	3737	64	3801	0.0168377	0.016732		1	555.994	0.00572864	555.989	0.0114573	556	2.06066e-05	2.12333e-05
		0.8244	3770	32	3738	64	3802	0.0168332	0.016732		1	556.994	0.00573896	556.989	0.0114779	557	2.06067e-05	2.12333e-05
		0.8232	3771	32	3739	64	3803	0.0168288	0.016732		1	557.994	0.00574928	557.989	0.0114986	558	2.06067e-05	2.12333e-05
		0.8226	3772	32	3740	64	3804	0.0168244	0.016732		1	558.994	0.0057596	558.988	0.0115192	559	2.06068e-05	2.12333e-05
		0.8225	3773	32	3741	64	3805	0.01682	0.016732		1	559.994	0.00576992	559.988	0.0115398	560	2.06069e-05	2.12333e-05
		0.8222	3774	32	3742	64	3806	0.0168156	0.016732		1	560.994	0.00578024	560.988	0.0115605	561	2.06069e-05	2.12333e-05
		0.8199	3775	32	3743	64	3807	0.0168111	0.016732		1	561.994	0.00579056	561.988	0.0115811	562	2.0607e-05	2.12333e-05
		0.8185	3776	32	3744	64	3808	0.0168067	0.016732		1	562.994	0.00580088	562.988	0.0116018	563	2.0607e-05	2.12333e-05
		0.8161	3777	32	3745	64	3809	0.0168023	0.016732		1	563.994	0.00581121	563.988	0.0116224	564	2.06071e-05	2.12333e-05
		0.816	3778	32	3746	64	3810	0.0167979	0.016732		1	564.994	0.00582153	564.988	0.0116431	565	2.06072e-05	2.12333e-05
		0.8157	3779	32	3747	64	3811	0.0167935	0.016732		1	565.994	0.00583185	565.988	0.0116637	566	2.06072e-05	2.12333e-05
		0.8138	3780	32	3748	64	3812	0.0167891	0.016732		1	566.994	0.00584217	566.988	0.0116843	567	2.06073e-05	2.12333e-05
		0.8131	3781	32	3749	64	3813	0.0167847	0.016732		1	567.994	0.00585249	567.988	0.011705	568	2.06074e-05	2.12333e-05
		0.813	3782	32	3750	64	3814	0.0167803	0.016732		1	568.994	0.00586281	568.988	0.0117256	569	2.06074e-05	2.12333e-05
		0.8128	3783	32	3751	64	3815	0.0167759	0.016732		1	569.994	0.00587313	569.988	0.0117463	570	2.06075e-05	2.12333e-05
		0.8115	3784	32	3752	64	3816	0.0167715	0.016732		1	570.994	0.00588346	570.988	0.0117669	571	2.06076e-05	2.12333e-05
		0.8106	3785	32	3753	64	3817	0.0167671	0.016732		1	571.994	0.00589378	571.988	0.0117876	572	2.06076e-05	2.12333e-05
		0.8097	3787	32	3755	64	3819	0.0167583	0.016732		1	572.994	0.0059041	572.988	0.0118082	573	2.06077e-05	2.12333e-05
		0.8095	3788	32	3756	64	3820	0.0167539	0.016732		1	573.994	0.00591442	573.988	0.0118288	574	2.06077e-05	2.12333e-05
		0.8093	3789	32	3757	64	3821	0.0167495	0.016732		1	574.994	0.00592474	574.988	0.0118495	575	2.06078e-05	2.12333e-05
		0.8088	3790	32	3758	64	3822	0.0167452	0.016732		1	575.994	0.00593507	575.988	0.0118701	576	2.06079e-05	2.12333e-05
		0.8067	3791	32	3759	64	3823	0.0167408	0.016732		1	576.994	0.00594539	576.988	0.0118908	577	2.06079e-05	2.12333e-05
		0.8066	3792	32	3760	64	3824	0.0167364	0.016732		1	577.994	0.00595571	577.988	0.0119114	578	2.0608e-05	2.12333e-05
		0.8063	3793	32	3761	64	3825	0.016732	0.016732		1	578.994	0.00596603	578.988	0.0119321	579	2.06081e-05	2.12333e-05
		0.8057	3793	33	3760	66	3826	0.0172504	0.0172414		1	579.994	0.00597636	579.988	0.0119527	580	2.06081e-05	2.12333e-05
		0.8052	3794	33	3761	66	3827	0.0172459	0.0172414		1	580.994	0.00598668	580.988	0.0119734	581	2.06082e-05	2.12333e-05
		0.8051	3795	33	3762	66	3828	0.0172414	0.0172414		1	581.994	0.005997	581.988	0.011994	582	2.06083e-05	2.12333e-05
		0.8039	3795	34	3761	68	3829	0.0177592	0.0176945		1	582.994	0.00600732	582.988	0.0120146	583	2.06083e-05	2.12333e-05
		0.8034	3796	34	3762	68	3830	0.0177546	0.0176945		1	583.994	0.00601765	583.988	0.0120353	584	2.06084e-05	2.12333e-05
		0.803	3797	34	3763	68	3831	0.0177499	0.0176945		1	584.994	0.00602797	584.988	0.0120559	585	2.06084e-05	2.12333e-05
		0.8028	3798	34	3764	68	3832	0.0177453	0.0176945		1	585.994	0.00603829	585.988	0.0120766	586	2.06085e-05	2.12333e-05
		0.8022	3799	34	3765	68	3833	0.0177407	0.0176945		1	586.994	0.00604862	586.988	0.0120972	587	2.06086e-05	2.12333e-05
		0.8	3800	34	3766	68	3834	0.017736	0.0176945		1	587.994	0.00605894	587.988	0.0121179	588	2.06086e-05	2.12333e-05
		0.7996	3801	34	3767	68	3835	0.0177314	0.0176945		1	588.994	0.00606926	588.988	0.0121385	589	2.06087e-05	2.12333e-05
		0.7994	3802	34	3768	68	3836	0.0177268	0.0176945		1	589.994	0.00607959	589.988	0.0121592	590	2.06088e-05	2.12333e-05
		0.799	3803	34	3769	68	3837	0.0177222	0.0176945		1	590.994	0.00608991	590.988	0.0121798	591	2.06088e-05	2.12333e-05
		0.7986	3804	34	3770	68	3838	0.0177176	0.0176945		1	591.994	0.00610024	591.988	0.0122005	592	2.06089e-05	2.12333e-05
		0.7983	3805	34	3771	68	3839	0.0177129	0.0176945		1	592.994	0.00611056	592.988	0.0122211	593	2.0609e-05	2.12333e-05
		0.7968	3806	34	3772	68	3840	0.0177083	0.0176945		1	593.994	0.00612088	593.988	0.0122418	594	2.0609e-05	2.12333e-05
		0.7962	3808	34	3774	68	3842	0.0176991	0.0176945		1	594.994	0.00613121	594.988	0.0122624	595	2.06091e-05	2.12333e-05
		0.7936	3809	34	3775	68	3843	0.0176945	0.0176945		1	595.994	0.00614153	595.988	0.0122831	596	2.06092e-05	2.12333e-05
		0.7932	3809	35	3774	70	3844	0.0182102	0.0180972		1	596.994	0.00615186	596.988	0.0123037	597	2.06092e-05	2.12333e-05
		0.7916	3810	35	3775	70	3845	0.0182055	0.0180972		1	597.994	0.00616218	597.988	0.0123244	598	2.06093e-05	2.12333e-05
		0.7909	3811	35	3776	70	3846	0.0182007	0.0180972		1	598.994	0.00617251	598.988	0.012345	599	2.06094e-05	2.12333e-05
		0.7904	3812	35	3777	70	3847	0.018196	0.0180972		1	599.994	0.00618283	599.988	0.0123657	600	2.06094e-05	2.12333e-05
		0.7893	3813	35	3778	70	3848	0.0181913	0.0180972		1	600.994	0.00619316	600.988	0.0123863	601	2.06095e-05	2.12333e-05
		0.7892	3814	35	3779	70	3849	0.0181865	0.0180972		1	601.994	0.00620348	601.988	0.012407	602	2.06096e-05	2.12333e-05
		0.7883	3815	35	3780	70	3850	0.0181818	0.0180972		1	602.994	0.00621381	602.988	0.0124276	603	2.06096e-05	2.12333e-05
		0.7876	3816	35	3781	70	3851	0.0181771	0.0180972		1	603.994	0.00622413	603.988	0.0124483	604	2.06097e-05	2.12333e-05
		0.787	3817	35	3782	70	3852	0.0181724	0.0180972		1	604.994	0.00623446	604.988	0.0124689	605	2.06098e-05	2.12333e-05
		0.7853	3818	35	3783	70	3853	0.0181677	0.0180972		1	605.994	0.00624479	605.988	0.0124896	606	2.06099e-05	2.12333e-05
		0.7847	3819	35	3784	70	3854	0.0181629	0.0180972		1	606.994	0.00625511	606.987	0.0125102	607	2.06099e-05	2.12333e-05
		0.7843	3820	35	3785	70	3855	0.0181582	0.0180972		1	607.994	0.00626544	607.987	0.0125309	608	2.061e-05	2.12333e-05
		0.7823	3821	35	3786	70	3856	0.0181535	0.0180972		1	608.994	0.00627576	608.987	0.0125515	609	2.06101e-05	2.12333e-05
		0.782	3822	35	3787	70	3857	0.0181488	0.0180972		1	609.994	0.00628609	609.987	0.0125722	610	2.06101e-05	2.12333e-05
		0.7805	3823	35	3788	70	3858	0.0181441	0.0180972		1	610.994	0.00629642	610.987	0.0125928	611	2.06102e-05	2.12333e-05
		0.7802	3824	35	3789	70	3859	0.0181394	0.0180972		1	611.994	0.00630674	611.987	0.0126135	612	2.06103e-05	2.12333e-05
		0.78	3825	35	3790	70	3860	0.0181347	0.0180972		1	612.994	0.00631707	612.987	0.0126341	613	2.06103e-05	2.12333e-05
		0.7792	3826	35	3791	70	3861	0.01813	0.0180972		1	613.994	0.0063274	613.987	0.0126548	614	2.06104e-05	2.12333e-05
		0.7775	3827	35	3792	70	3862	0.0181253	0.0180972		1	614.994	0.00633773	614.987	0.0126755	615	2.06105e-05	2.12333e-05
		0.7768	3828	35	3793	70	3863	0.0181206	0.0180972		1	615.994	0.00634805	615.987	0.0126961	616	2.06106e-05	2.12333e-05
		0.7763	3829	35	3794	70	3864	0.0181159	0.0180972		1	616.994	0.00635838	616.987	0.0127168	617	2.06106e-05	2.12333e-05
		0.7751	3830	35	3795	70	3865	0.0181113	0.0180972		1	617.994	0.00636871	617.987	0.0127374	618	2.06107e-05	2.12333e-05
		0.774	3831	35	3796	70	3866	0.0181066	0.0180972		1	618.994	0.00637904	618.987	0.0127581	619	2.06108e-05	2.12333e-05
		0.7726	3832	35	3797	70	3867	0.0181019	0.0180972		1	619.994	0.00638936	619.987	0.0127787	620	2.06109e-05	2.12333e-05
		0.7724	3833	35	3798	70	3868	0.0180972	0.0180972		1	620.994	0.00639969	620.987	0.0127994	621	2.06109e-05	2.12333e-05
		0.7719	3833	36	3797	72	3869	0.0186095	0.0185711		1	621.994	0.00641002	621.987	0.01282	622	2.0611e-05	2.12333e-05
		0.7718	3834	36	3798	72	3870	0.0186047	0.0185711		1	622.994	0.00642035	622.987	0.0128407	623	2.06111e-05	2.12333e-05
		0.7706	3837	36	3801	72	3873	0.0185902	0.0185711		1	623.994	0.00643068	623.987	0.0128614	624	2.06111e-05	2.12333e-05
		0.7704	3839	36	3803	72	3875	0.0185806	0.0185711		1	624.994	0.00644101	624.987	0.012882	625	2.06112e-05	2.12333e-05
		0.769	3840	36	3804	72	3876	0.0185759	0.0185711		1	625.994	0.00645134	625.987	0.0129027	626	2.06113e-05	2.12333e-05
		0.7677	3841	36	3805	72	3877	0.0185711	0.0185711		1	626.994	0.00646167	626.987	0.0129233	627	2.06114e-05	2.12333e-05
		0.7657	3841	37	3804	74	3878	0.019082	0.0190722		1	627.994	0.006472	627.987	0.012944	628	2.06115e-05	2.12333e-05
		0.7627	3842	37	3805	74	3879	0.0190771	0.0190722		1	628.994	0.00648233	628.987	0.0129647	629	2.06115e-05	2.12333e-05
		0.7622	3843	37	3806	74	3880	0.0190722	0.0190722		1	629.994	0.00649266	629.987	0.0129853	630	2.06116e-05	2.12333e-05
		0.7577	3844	38	3806	76	3882	0.0195775	0.0195574		1	630.993	0.00650299	630.987	0.013006	631	2.06117e-05	2.12333e-05
		0.7557	3845	38	3807	76	3883	0.0195725	0.0195574		1	631.993	0.00651332	631.987	0.0130266	632	2.06118e-05	2.12333e-05
		0.7556	3846	38	3808	76	3884	0.0195675	0.0195574		1	632.993	0.00652365	632.987	0.0130473	633	2.06118e-05	2.12333e-05
		0.7555	3847	38	3809	76	3885	0.0195624	0.0195574		1	633.993	0.00653398	633.987	0.013068	634	2.06119e-05	2.12333e-05
		0.755	3848	38	3810	76	3886	0.0195574	0.0195574		1	634.993	0.00654431	634.987	0.0130886	635	2.0612e-05	2.12333e-05
		0.7545	3848	39	3809	78	3887	0.0200669	0.0200463		1	635.993	0.00655464	635.987	0.0131093	636	2.06121e-05	2.12333e-05
		0.7535	3849	39	3810	78	3888	0.0200617	0.0200463		1	636.993	0.00656497	636.987	0.0131299	637	2.06122e-05	2.12333e-05
		0.7526	3850	39	3811	78	3889	0.0200566	0.0200463		1	637.993	0.0065753	637.987	0.0131506	638	2.06122e-05	2.12333e-05
		0.7524	3851	39	3812	78	3890	0.0200514	0.0200463		1	638.993	0.00658564	638.987	0.0131713	639	2.06123e-05	2.12333e-05
		0.7516	3852	39	3813	78	3891	0.0200463	0.0200463		1	639.993	0.00659597	639.987	0.0131919	640	2.06124e-05	2.12333e-05
		0.7511	3852	40	3812	80	3892	0.020555	0.020555		1	640.993	0.0066063	640.987	0.0132126	641	2.06125e-05	2.12333e-05
		0.7486	3852	41	3811	82	3893	0.0210634	0.021058		1	641.993	0.00661663	641.987	0.0132333	642	2.06126e-05	2.12333e-05
		0.7483	3853	41	3812	82	3894	0.021058	0.021058		1	642.993	0.00662697	642.987	0.0132539	643	2.06126e-05	2.12333e-05
		0.7476	3853	42	3811	84	3895	0.0215661	0.0215661		1	643.993	0.0066373	643.987	0.0132746	644	2.06127e-05	2.12333e-05
		0.7457	3853	43	3810	86	3896	0.0220739	0.0220739		1	644.993	0.00664763	644.987	0.0132953	645	2.06128e-05	2.12333e-05
		0.7456	3853	44	3809	88	3897	0.0225815	0.0224949		1	645.993	0.00665797	645.987	0.0133159	646	2.06129e-05	2.12333e-05
		0.7442	3854	44	3810	88	3898	0.0225757	0.0224949		1	646.993	0.0066683	646.987	0.0133366	647	2.0613e-05	2.12333e-05
		0.7425	3855	44	3811	88	3899	0.0225699	0.0224949		1	647.993	0.00667863	647.987	0.0133573	648	2.06131e-05	2.12333e-05
		0.7424	3856	44	3812	88	3900	0.0225641	0.0224949		1	648.993	0.00668897	648.987	0.0133779	649	2.06132e-05	2.12333e-05
		0.7422	3857	44	3813	88	3901	0.0225583	0.0224949		1	649.993	0.0066993	649.987	0.0133986	650	2.06132e-05	2.12333e-05
		0.7416	3860	44	3816	88	3904	0.022541	0.0224949		1	650.993	0.00670964	650.987	0.0134193	651	2.06133e-05	2.12333e-05
		0.7411	3861	44	3817	88	3905	0.0225352	0.0224949		1	651.993	0.00671997	651.987	0.0134399	652	2.06134e-05	2.12333e-05
		0.7395	3862	44	3818	88	3906	0.0225294	0.0224949		1	652.993	0.00673031	652.987	0.0134606	653	2.06135e-05	2.12333e-05
		0.7391	3863	44	3819	88	3907	0.0225237	0.0224949		1	653.993	0.00674065	653.987	0.0134813	654	2.06136e-05	2.12333e-05
		0.7377	3864	44	3820	88	3908	0.0225179	0.0224949		1	654.993	0.00675098	654.986	0.013502	655	2.06137e-05	2.12333e-05
		0.736	3865	44	3821	88	3909	0.0225122	0.0224949		1	655.993	0.00676132	655.986	0.0135226	656	2.06138e-05	2.12333e-05
		0.7358	3866	44	3822	88	3910	0.0225064	0.0224949		1	656.993	0.00677166	656.986	0.0135433	657	2.06139e-05	2.12333e-05
		0.7357	3867	44	3823	88	3911	0.0225006	0.0224949		1	657.993	0.00678199	657.986	0.013564	658	2.0614e-05	2.12333e-05
		0.7354	3868	44	3824	88	3912	0.0224949	0.0224949		1	658.993	0.00679233	658.986	0.0135847	659	2.06141e-05	2.12333e-05
		0.7349	3868	45	3823	90	3913	0.0230003	0.0229475		1	659.993	0.00680267	659.986	0.0136053	660	2.06141e-05	2.12333e-05
		0.7337	3869	45	3824	90	3914	0.0229944	0.0229475		1	660.993	0.00681301	660.986	0.013626	661	2.06142e-05	2.12333e-05
		0.7335	3871	45	3826	90	3916	0.0229826	0.0229475		1	661.993	0.00682335	661.986	0.0136467	662	2.06143e-05	2.12333e-05
		0.7326	3872	45	3827	90	3917	0.0229768	0.0229475		1	662.993	0.00683368	662.986	0.0136674	663	2.06144e-05	2.12333e-05
		0.7309	3873	45	3828	90	3918	0.0229709	0.0229475		1	663.993	0.00684402	663.986	0.013688	664	2.06145e-05	2.12333e-05
		0.7297	3874	45	3829	90	3919	0.022965	0.0229475		1	664.993	0.00685436	664.986	0.0137087	665	2.06146e-05	2.12333e-05
		0.7272	3875	45	3830	90	3920	0.0229592	0.0229475		1	665.993	0.0068647	665.986	0.0137294	666	2.06147e-05	2.12333e-05
		0.7259	3876	45	3831	90	3921	0.0229533	0.0229475		1	666.993	0.00687504	666.986	0.0137501	667	2.06148e-05	2.12333e-05
		0.7229	3877	45	3832	90	3922	0.0229475	0.0229475		1	667.993	0.00688538	667.986	0.0137708	668	2.06149e-05	2.12333e-05
		0.7207	3878	46	3832	92	3924	0.0234455	0.0232558		1	668.993	0.00689572	668.986	0.0137914	669	2.0615e-05	2.12333e-05
		0.7193	3879	46	3833	92	3925	0.0234395	0.0232558		1	669.993	0.00690607	669.986	0.0138121	670	2.06151e-05	2.12333e-05
		0.7186	3880	46	3834	92	3926	0.0234335	0.0232558		1	670.993	0.00691641	670.986	0.0138328	671	2.06152e-05	2.12333e-05
		0.7185	3881	46	3835	92	3927	0.0234276	0.0232558		1	671.993	0.00692675	671.986	0.0138535	672	2.06153e-05	2.12333e-05
		0.7143	3882	46	3836	92	3928	0.0234216	0.0232558		1	672.993	0.00693709	672.986	0.0138742	673	2.06154e-05	2.12333e-05
		0.7135	3883	46	3837	92	3929	0.0234156	0.0232558		1	673.993	0.00694744	673.986	0.0138949	674	2.06155e-05	2.12333e-05
		0.7129	3884	46	3838	92	3930	0.0234097	0.0232558		1	674.993	0.00695778	674.986	0.0139156	675	2.06156e-05	2.12333e-05
		0.7126	3885	46	3839	92	3931	0.0234037	0.0232558		1	675.993	0.00696812	675.986	0.0139362	676	2.06157e-05	2.12333e-05
		0.7122	3886	46	3840	92	3932	0.0233978	0.0232558		1	676.993	0.00697847	676.986	0.0139569	677	2.06159e-05	2.12333e-05
		0.7109	3887	46	3841	92	3933	0.0233918	0.0232558		1	677.993	0.00698881	677.986	0.0139776	678	2.0616e-05	2.12333e-05
		0.7108	3888	46	3842	92	3934	0.0233859	0.0232558		1	678.993	0.00699916	678.986	0.0139983	679	2.06161e-05	2.12333e-05
		0.71	3889	46	3843	92	3935	0.0233799	0.0232558		1	679.993	0.0070095	679.986	0.014019	680	2.06162e-05	2.12333e-05
		0.7096	3890	46	3844	92	3936	0.023374	0.0232558		1	680.993	0.00701985	680.986	0.0140397	681	2.06163e-05	2.12333e-05
		0.7093	3891	46	3845	92	3937	0.023368	0.0232558		1	681.993	0.00703019	681.986	0.0140604	682	2.06164e-05	2.12333e-05
		0.7059	3892	46	3846	92	3938	0.0233621	0.0232558		1	682.993	0.00704054	682.986	0.0140811	683	2.06165e-05	2.12333e-05
		0.7053	3893	46	3847	92	3939	0.0233562	0.0232558		1	683.993	0.00705089	683.986	0.0141018	684	2.06166e-05	2.12333e-05
		0.7026	3894	46	3848	92	3940	0.0233503	0.0232558		1	684.993	0.00706124	684.986	0.0141225	685	2.06167e-05	2.12333e-05
		0.7015	3895	46	3849	92	3941	0.0233443	0.0232558		1	685.993	0.00707158	685.986	0.0141432	686	2.06169e-05	2.12333e-05
		0.7012	3896	46	3850	92	3942	0.0233384	0.0232558		1	686.993	0.00708193	686.986	0.0141639	687	2.0617e-05	2.12333e-05
		0.7009	3897	46	3851	92	3943	0.0233325	0.0232558		1	687.993	0.00709228	687.986	0.0141846	688	2.06171e-05	2.12333e-05
		0.6983	3898	46	3852	92	3944	0.0233266	0.0232558		1	688.993	0.00710263	688.986	0.0142053	689	2.06172e-05	2.12333e-05
		0.6975	3899	46	3853	92	3945	0.0233207	0.0232558		1	689.993	0.00711298	689.986	0.014226	690	2.06173e-05	2.12333e-05
		0.6973	3900	46	3854	92	3946	0.0233147	0.0232558		1	690.993	0.00712333	690.986	0.0142467	691	2.06175e-05	2.12333e-05
		0.6971	3901	46	3855	92	3947	0.0233088	0.0232558		1	691.993	0.00713368	691.986	0.0142674	692	2.06176e-05	2.12333e-05
		0.6968	3902	46	3856	92	3948	0.0233029	0.0232558		1	692.993	0.00714404	692.986	0.0142881	693	2.06177e-05	2.12333e-05
		0.6963	3903	46	3857	92	3949	0.023297	0.0232558		1	693.993	0.00715439	693.986	0.0143088	694	2.06178e-05	2.12333e-05
		0.6957	3904	46	3858	92	3950	0.0232911	0.0232558		1	694.993	0.00716474	694.986	0.0143295	695	2.0618e-05	2.12333e-05
		0.6942	3905	46	3859	92	3951	0.0232852	0.0232558		1	695.993	0.00717509	695.986	0.0143502	696	2.06181e-05	2.12333e-05
		0.694	3906	46	3860	92	3952	0.0232794	0.0232558		1	696.993	0.00718545	696.986	0.0143709	697	2.06182e-05	2.12333e-05
		0.6925	3907	46	3861	92	3953	0.0232735	0.0232558		1	697.993	0.0071958	697.986	0.0143916	698	2.06183e-05	2.12333e-05
		0.6923	3908	46	3862	92	3954	0.0232676	0.0232558		1	698.993	0.00720616	698.986	0.0144123	699	2.06185e-05	2.12333e-05
		0.6922	3909	46	3863	92	3955	0.0232617	0.0232558		1	699.993	0.00721651	699.986	0.014433	700	2.06186e-05	2.12333e-05
		0.6917	3910	46	3864	92	3956	0.0232558	0.0232558		1	700.993	0.00722687	700.986	0.0144537	701	2.06187e-05	2.12333e-05
		0.6901	3910	47	3863	94	3957	0.0237554	0.0237074		1	701.993	0.00723723	701.986	0.0144745	702	2.06189e-05	2.12333e-05
		0.6895	3911	47	3864	94	3958	0.0237494	0.0237074		1	702.993	0.00724758	702.986	0.0144952	703	2.0619e-05	2.12333e-05
		0.6894	3912	47	3865	94	3959	0.0237434	0.0237074		1	703.993	0.00725794	703.985	0.0145159	704	2.06192e-05	2.12333e-05
		0.6889	3913	47	3866	94	3960	0.0237374	0.0237074		1	704.993	0.0072683	704.985	0.0145366	705	2.06193e-05	2.12333e-05
		0.6874	3914	47	3867	94	3961	0.0237314	0.0237074		1	705.993	0.00727866	705.985	0.0145573	706	2.06194e-05	2.12333e-05
		0.6868	3915	47	3868	94	3962	0.0237254	0.0237074		1	706.993	0.00728902	706.985	0.014578	707	2.06196e-05	2.12333e-05
		0.6849	3916	47	3869	94	3963	0.0237194	0.0237074		1	707.993	0.00729938	707.985	0.0145988	708	2.06197e-05	2.12333e-05
		0.6842	3917	47	3870	94	3964	0.0237134	0.0237074		1	708.993	0.00730974	708.985	0.0146195	709	2.06199e-05	2.12333e-05
		0.6833	3918	47	3871	94	3965	0.0237074	0.0237074		1	709.993	0.00732011	709.985	0.0146402	710	2.062e-05	2.12333e-05
		0.6832	3918	48	3870	96	3966	0.0242057	0.0241449		1	710.993	0.00733047	710.985	0.0146609	711	2.06202e-05	2.12333e-05
		0.6826	3919	48	3871	96	3967	0.0241996	0.0241449		1	711.993	0.00734083	711.985	0.0146817	712	2.06203e-05	2.12333e-05
		0.6805	3920	48	3872	96	3968	0.0241935	0.0241449		1	712.993	0.0073512	712.985	0.0147024	713	2.06205e-05	2.12333e-05
		0.6768	3921	48	3873	96	3969	0.0241875	0.0241449		1	713.993	0.00736156	713.985	0.0147231	714	2.06206e-05	2.12333e-05
		0.6754	3922	48	3874	96	3970	0.0241814	0.0241449		1	714.993	0.00737193	714.985	0.0147439	715	2.06208e-05	2.12333e-05
		0.6751	3923	48	3875	96	3971	0.0241753	0.0241449		1	715.993	0.00738229	715.985	0.0147646	716	2.06209e-05	2.12333e-05
		0.6737	3924	48	3876	96	3972	0.0241692	0.0241449		1	716.993	0.00739266	716.985	0.0147853	717	2.06211e-05	2.12333e-05
		0.6735	3925	48	3877	96	3973	0.0241631	0.0241449		1	717.993	0.00740303	717.985	0.0148061	718	2.06213e-05	2.12333e-05
		0.6734	3926	48	3878	96	3974	0.024157	0.0241449		1	718.993	0.0074134	718.985	0.0148268	719	2.06214e-05	2.12333e-05
		0.6733	3927	48	3879	96	3975	0.0241509	0.0241449		1	719.993	0.00742377	719.985	0.0148475	720	2.06216e-05	2.12333e-05
		0.6703	3928	48	3880	96	3976	0.0241449	0.0241449		1	720.993	0.00743414	720.985	0.0148683	721	2.06217e-05	2.12333e-05
		0.6696	3928	49	3879	98	3977	0.0246417	0.0246231		1	721.993	0.00744451	721.985	0.014889	722	2.06219e-05	2.12333e-05
		0.6695	3929	49	3880	98	3978	0.0246355	0.0246231		1	722.993	0.00745488	722.985	0.0149098	723	2.06221e-05	2.12333e-05
		0.6682	3930	49	3881	98	3979	0.0246293	0.0246231		1	723.993	0.00746526	723.985	0.0149305	724	2.06223e-05	2.12333e-05
		0.6679	3931	49	3882	98	3980	0.0246231	0.0246231		1	724.993	0.00747563	724.985	0.0149513	725	2.06224e-05	2.12333e-05
		0.6667	3931	50	3881	100	3981	0.0251193	0.0249813		1	725.993	0.007486	725.985	0.014972	726	2.06226e-05	2.12333e-05
		0.6653	3932	50	3882	100	3982	0.025113	0.0249813		1	726.993	0.00749638	726.985	0.0149928	727	2.06228e-05	2.12333e-05
		0.6648	3933	50	3883	100	3983	0.0251067	0.0249813		1	727.992	0.00750676	727.985	0.0150135	728	2.0623e-05	2.12333e-05
		0.6643	3934	50	3884	100	3984	0.0251004	0.0249813		1	728.992	0.00751713	728.985	0.0150343	729	2.06231e-05	2.12333e-05
		0.6641	3935	50	3885	100	3985	0.0250941	0.0249813		1	729.992	0.00752751	729.985	0.015055	730	2.06233e-05	2.12333e-05
		0.664	3936	50	3886	100	3986	0.0250878	0.0249813		1	730.992	0.00753789	730.985	0.0150758	731	2.06235e-05	2.12333e-05
		0.6635	3937	50	3887	100	3987	0.0250815	0.0249813		1	731.992	0.00754827	731.985	0.0150965	732	2.06237e-05	2.12333e-05
		0.6632	3938	50	3888	100	3988	0.0250752	0.0249813		1	732.992	0.00755865	732.985	0.0151173	733	2.06239e-05	2.12333e-05
		0.6585	3939	50	3889	100	3989	0.0250689	0.0249813		1	733.992	0.00756903	733.985	0.0151381	734	2.06241e-05	2.12333e-05
		0.6575	3941	50	3891	100	3991	0.0250564	0.0249813		1	734.992	0.00757942	734.985	0.0151588	735	2.06243e-05	2.12333e-05
		0.6574	3942	50	3892	100	3992	0.0250501	0.0249813		1	735.992	0.0075898	735.985	0.0151796	736	2.06245e-05	2.12333e-05
		0.6554	3943	50	3893	100	3993	0.0250438	0.0249813		1	736.992	0.00760019	736.985	0.0152004	737	2.06247e-05	2.12333e-05
		0.655	3944	50	3894	100	3994	0.0250376	0.0249813		1	737.992	0.00761057	737.985	0.0152211	738	2.06249e-05	2.12333e-05
		0.6547	3945	50	3895	100	3995	0.0250313	0.0249813		1	738.992	0.00762096	738.985	0.0152419	739	2.06251e-05	2.12333e-05
		0.6527	3946	50	3896	100	3996	0.025025	0.0249813		1	739.992	0.00763135	739.985	0.0152627	740	2.06253e-05	2.12333e-05
		0.6521	3947	50	3897	100	3997	0.0250188	0.0249813		1	740.992	0.00764174	740.985	0.0152835	741	2.06255e-05	2.12333e-05
		0.652	3948	50	3898	100	3998	0.0250125	0.0249813		1	741.992	0.00765213	741.985	0.0153043	742	2.06257e-05	2.12333e-05
		0.6516	3949	50	3899	100	3999	0.0250063	0.0249813		1	742.992	0.00766252	742.985	0.015325	743	2.06259e-05	2.12333e-05
		0.6504	3950	50	3900	100	4000	0.025	0.0249813		1	743.992	0.00767291	743.985	0.0153458	744	2.06261e-05	2.12333e-05
		0.6486	3951	50	3901	100	4001	0.0249938	0.0249813		1	744.992	0.0076833	744.985	0.0153666	745	2.06263e-05	2.12333e-05
		0.6474	3952	50	3902	100	4002	0.0249875	0.0249813		1	745.992	0.0076937	745.985	0.0153874	746	2.06265e-05	2.12333e-05
		0.646	3953	50	3903	100	4003	0.0249813	0.0249813		1	746.992	0.00770409	746.985	0.0154082	747	2.06268e-05	2.12333e-05
		0.6459	3953	51	3902	102	4004	0.0254745	0.0254491		1	747.992	0.00771449	747.985	0.015429	748	2.0627e-05	2.12333e-05
		0.6456	3954	51	3903	102	4005	0.0254682	0.0254491		1	748.992	0.00772489	748.985	0.0154498	749	2.06272e-05	2.12333e-05
		0.6426	3955	51	3904	102	4006	0.0254618	0.0254491		1	749.992	0.00773529	749.985	0.0154706	750	2.06274e-05	2.12333e-05
		0.6422	3956	51	3905	102	4007	0.0254555	0.0254491		1	750.992	0.00774569	750.985	0.0154914	751	2.06277e-05	2.12333e-05
		0.6418	3957	51	3906	102	4008	0.0254491	0.0254491		1	751.992	0.00775609	751.984	0.0155122	752	2.06279e-05	2.12333e-05
		0.6395	3957	52	3905	104	4009	0.0259416	0.0259416		1	752.992	0.0077665	752.984	0.015533	753	2.06281e-05	2.12333e-05
		0.6394	3957	53	3904	106	4010	0.0264339	0.0264339		1	753.992	0.0077769	753.984	0.0155538	754	2.06284e-05	2.12333e-05
		0.6363	3957	54	3903	108	4011	0.026926	0.026926		1	754.992	0.00778731	754.984	0.0155746	755	2.06286e-05	2.12333e-05
		0.6357	3957	55	3902	110	4012	0.0274177	0.0273836		1	755.992	0.00779771	755.984	0.0155954	756	2.06289e-05	2.12333e-05
		0.6342	3958	55	3903	110	4013	0.0274109	0.0273836		1	756.992	0.00780812	756.984	0.0156162	757	2.06291e-05	2.12333e-05
		0.6335	3959	55	3904	110	4014	0.0274041	0.0273836		1	757.992	0.00781853	757.984	0.0156371	758	2.06294e-05	2.12333e-05
		0.6319	3960	55	3905	110	4015	0.0273973	0.0273836		1	758.992	0.00782894	758.984	0.0156579	759	2.06296e-05	2.12333e-05
		0.6309	3961	55	3906	110	4016	0.0273904	0.0273836		1	759.992	0.00783935	759.984	0.0156787	760	2.06299e-05	2.12333e-05
		0.6304	3962	55	3907	110	4017	0.0273836	0.0273836		1	760.992	0.00784977	760.984	0.0156995	761	2.06301e-05	2.12333e-05
		0.6293	3962	56	3906	112	4018	0.0278746	0.0278676		1	761.992	0.00786018	761.984	0.0157204	762	2.06304e-05	2.12333e-05
		0.6274	3963	56	3907	112	4019	0.0278676	0.0278676		1	762.992	0.0078706	762.984	0.0157412	763	2.06307e-05	2.12333e-05
		0.6271	3964	57	3907	114	4021	0.0283512	0.0283441		1	763.992	0.00788102	763.984	0.015762	764	2.06309e-05	2.12333e-05
		0.6266	3965	57	3908	114	4022	0.0283441	0.0283441		1	764.992	0.00789144	764.984	0.0157829	765	2.06312e-05	2.12333e-05
		0.6265	3965	58	3907	116	4023	0.0288342	0.0288342		1	765.992	0.00790186	765.984	0.0158037	766	2.06315e-05	2.12333e-05
		0.6264	3965	59	3906	118	4024	0.0293241	0.0292804		1	766.992	0.00791228	766.984	0.0158246	767	2.06318e-05	2.12333e-05
		0.6258	3966	59	3907	118	4025	0.0293168	0.0292804		1	767.992	0.00792271	767.984	0.0158454	768	2.0632e-05	2.12333e-05
		0.6244	3967	59	3908	118	4026	0.0293095	0.0292804		1	768.992	0.00793313	768.984	0.0158663	769	2.06323e-05	2.12333e-05
		0.6241	3968	59	3909	118	4027	0.0293022	0.0292804		1	769.992	0.00794356	769.984	0.0158871	770	2.06326e-05	2.12333e-05
		0.6227	3969	59	3910	118	4028	0.0292949	0.0292804		1	770.992	0.00795399	770.984	0.015908	771	2.06329e-05	2.12333e-05
		0.6223	3970	59	3911	118	4029	0.0292877	0.0292804		1	771.992	0.00796442	771.984	0.0159288	772	2.06332e-05	2.12333e-05
		0.6214	3971	59	3912	118	4030	0.0292804	0.0292804		1	772.992	0.00797485	772.984	0.0159497	773	2.06335e-05	2.12333e-05
		0.6213	3972	60	3912	120	4032	0.0297619	0.0296296		1	773.992	0.00798528	773.984	0.0159706	774	2.06338e-05	2.12333e-05
		0.6192	3973	60	3913	120	4033	0.0297545	0.0296296		1	774.992	0.00799572	774.984	0.0159914	775	2.06341e-05	2.12333e-05
		0.6189	3974	60	3914	120	4034	0.0297471	0.0296296		1	775.992	0.00800616	775.984	0.0160123	776	2.06344e-05	2.12333e-05
		0.6168	3975	60	3915	120	4035	0.0297398	0.0296296		1	776.992	0.0080166	776.984	0.0160332	777	2.06347e-05	2.12333e-05
		0.6167	3976	60	3916	120	4036	0.0297324	0.0296296		1	777.992	0.00802704	777.984	0.0160541	778	2.06351e-05	2.12333e-05
		0.6164	3977	60	3917	120	4037	0.029725	0.0296296		1	778.992	0.00803748	778.984	0.016075	779	2.06354e-05	2.12333e-05
		0.6144	3978	60	3918	120	4038	0.0297177	0.0296296		1	779.992	0.00804792	779.984	0.0160958	780	2.06357e-05	2.12333e-05
		0.6138	3979	60	3919	120	4039	0.0297103	0.0296296		1	780.992	0.00805837	780.984	0.0161167	781	2.0636e-05	2.12333e-05
		0.6118	3980	60	3920	120	4040	0.029703	0.0296296		1	781.992	0.00806882	781.984	0.0161376	782	2.06364e-05	2.12333e-05
		0.6114	3981	60	3921	120	4041	0.0296956	0.0296296		1	782.992	0.00807926	782.984	0.0161585	783	2.06367e-05	2.12333e-05
		0.61	3982	60	3922	120	4042	0.0296883	0.0296296		1	783.992	0.00808972	783.984	0.0161794	784	2.0637e-05	2.12333e-05
		0.6091	3983	60	3923	120	4043	0.0296809	0.0296296		1	784.992	0.00810017	784.984	0.0162003	785	2.06374e-05	2.12333e-05
		0.608	3985	60	3925	120	4045	0.0296663	0.0296296		1	785.992	0.00811062	785.984	0.0162212	786	2.06377e-05	2.12333e-05
		0.6063	3986	60	3926	120	4046	0.0296589	0.0296296		1	786.992	0.00812108	786.984	0.0162422	787	2.06381e-05	2.12333e-05
		0.6062	3987	60	3927	120	4047	0.0296516	0.0296296		1	787.992	0.00813154	787.984	0.0162631	788	2.06384e-05	2.12333e-05
		0.6044	3988	60	3928	120	4048	0.0296443	0.0296296		1	788.992	0.008142	788.984	0.016284	789	2.06388e-05	2.12333e-05
		0.6038	3989	60	3929	120	4049	0.0296369	0.0296296		1	789.992	0.00815247	789.984	0.0163049	790	2.06392e-05	2.12333e-05
		0.6025	3990	60	3930	120	4050	0.0296296	0.0296296		1	790.992	0.00816293	790.984	0.0163259	791	2.06395e-05	2.12333e-05
		0.6022	3990	61	3929	122	4051	0.030116	0.0301012		1	791.992	0.0081734	791.984	0.0163468	792	2.06399e-05	2.12333e-05
		0.6013	3991	61	3930	122	4052	0.0301086	0.0301012		1	792.992	0.00818387	792.984	0.0163677	793	2.06403e-05	2.12333e-05
		0.6007	3992	61	3931	122	4053	0.0301012	0.0301012		1	793.992	0.00819434	793.984	0.0163887	794	2.06406e-05	2.12333e-05
		0.6005	3992	62	3930	124	4054	0.0305871	0.0305795		1	794.992	0.00820481	794.984	0.0164096	795	2.0641e-05	2.12333e-05
		0.5994	3993	62	3931	124	4055	0.0305795	0.0305795		1	795.992	0.00821529	795.984	0.0164306	796	2.06414e-05	2.12333e-05
		0.5988	3993	63	3930	126	4056	0.0310651	0.0310192		1	796.992	0.00822576	796.984	0.0164515	797	2.06418e-05	2.12333e-05
		0.5983	3994	63	3931	126	4057	0.0310574	0.0310192		1	797.992	0.00823624	797.984	0.0164725	798	2.06422e-05	2.12333e-05
		0.5974	3995	63	3932	126	4058	0.0310498	0.0310192		1	798.992	0.00824673	798.984	0.0164935	799	2.06426e-05	2.12333e-05
		0.5973	3996	63	3933	126	4059	0.0310421	0.0310192		1	799.992	0.00825721	799.983	0.0165144	800	2.0643e-05	2.12333e-05
		0.5961	3997	63	3934	126	4060	0.0310345	0.0310192		1	800.992	0.0082677	800.983	0.0165354	801	2.06434e-05	2.12333e-05
		0.5938	3998	63	3935	126	4061	0.0310268	0.0310192		1	801.992	0.00827819	801.983	0.0165564	802	2.06439e-05	2.12333e-05
		0.5933	3999	63	3936	126	4062	0.0310192	0.0310192		1	802.992	0.00828868	802.983	0.0165774	803	2.06443e-05	2.12333e-05
		0.5929	3999	64	3935	128	4063	0.0315038	0.0314961		1	803.992	0.00829917	803.983	0.0165983	804	2.06447e-05	2.12333e-05
		0.5923	4000	64	3936	128	4064	0.0314961	0.0314961		1	804.992	0.00830967	804.983	0.0166193	805	2.06451e-05	2.12333e-05
		0.592	4000	65	3935	130	4065	0.0319803	0.0319803		1	805.992	0.00832017	805.983	0.0166403	806	2.06456e-05	2.12333e-05
		0.5913	4000	66	3934	132	4066	0.0324643	0.0324324		1	806.992	0.00833067	806.983	0.0166613	807	2.0646e-05	2.12333e-05
		0.5906	4001	66	3935	132	4067	0.0324564	0.0324324		1	807.992	0.00834117	807.983	0.0166823	808	2.06465e-05	2.12333e-05
		0.5877	4002	66	3936	132	4068	0.0324484	0.0324324		1	808.992	0.00835168	808.983	0.0167034	809	2.06469e-05	2.12333e-05
		0.5876	4003	66	3937	132	4069	0.0324404	0.0324324		1	809.992	0.00836219	809.983	0.0167244	810	2.06474e-05	2.12333e-05
		0.5872	4004	66	3938	132	4070	0.0324324	0.0324324		1	810.992	0.0083727	810.983	0.0167454	811	2.06478e-05	2.12333e-05
		0.587	4004	67	3937	134	4071	0.0329157	0.0328915		1	811.992	0.00838321	811.983	0.0167664	812	2.06483e-05	2.12333e-05
		0.5865	4005	67	3938	134	4072	0.0329077	0.0328915		1	812.992	0.00839373	812.983	0.0167875	813	2.06488e-05	2.12333e-05
		0.5845	4007	67	3940	134	4074	0.0328915	0.0328915		1	813.992	0.00840425	813.983	0.0168085	814	2.06493e-05	2.12333e-05
		0.5834	4007	68	3939	136	4075	0.0333742	0.0333742		1	814.992	0.00841477	814.983	0.0168295	815	2.06497e-05	2.12333e-05
		0.583	4007	69	3938	138	4076	0.0338567	0.0337408		1	815.992	0.0084253	815.983	0.0168506	816	2.06502e-05	2.12333e-05
		0.5816	4008	69	3939	138	4077	0.0338484	0.0337408		1	816.992	0.00843582	816.983	0.0168716	817	2.06507e-05	2.12333e-05
		0.5802	4009	69	3940	138	4078	0.0338401	0.0337408		1	817.992	0.00844635	817.983	0.0168927	818	2.06512e-05	2.12333e-05
		0.5783	4010	69	3941	138	4079	0.0338318	0.0337408		1	818.992	0.00845689	818.983	0.0169138	819	2.06517e-05	2.12333e-05
		0.5782	4011	69	3942	138	4080	0.0338235	0.0337408		1	819.992	0.00846742	819.983	0.0169348	820	2.06522e-05	2.12333e-05
		0.5771	4012	69	3943	138	4081	0.0338152	0.0337408		1	820.992	0.00847796	820.983	0.0169559	821	2.06528e-05	2.12333e-05
		0.5766	4013	69	3944	138	4082	0.033807	0.0337408		1	821.992	0.0084885	821.983	0.016977	822	2.06533e-05	2.12333e-05
		0.5742	4014	69	3945	138	4083	0.0337987	0.0337408		1	822.992	0.00849905	822.983	0.0169981	823	2.06538e-05	2.12333e-05
		0.5734	4015	69	3946	138	4084	0.0337904	0.0337408		1	823.991	0.0085096	823.983	0.0170192	824	2.06544e-05	2.12333e-05
		0.573	4016	69	3947	138	4085	0.0337821	0.0337408		1	824.991	0.00852015	824.983	0.0170403	825	2.06549e-05	2.12333e-05
		0.5729	4017	69	3948	138	4086	0.0337739	0.0337408		1	825.991	0.0085307	825.983	0.0170614	826	2.06554e-05	2.12333e-05
		0.5722	4018	69	3949	138	4087	0.0337656	0.0337408		1	826.991	0.00854126	826.983	0.0170825	827	2.0656e-05	2.12333e-05
		0.5719	4019	69	3950	138	4088	0.0337573	0.0337408		1	827.991	0.00855182	827.983	0.0171036	828	2.06566e-05	2.12333e-05
		0.5718	4020	69	3951	138	4089	0.0337491	0.0337408		1	828.991	0.00856238	828.983	0.0171248	829	2.06571e-05	2.12333e-05
		0.5701	4021	69	3952	138	4090	0.0337408	0.0337408		1	829.991	0.00857295	829.983	0.0171459	830	2.06577e-05	2.12333e-05
		0.569	4021	70	3951	140	4091	0.0342215	0.0341964		1	830.991	0.00858351	830.983	0.017167	831	2.06583e-05	2.12333e-05
		0.5686	4022	70	3952	140	4092	0.0342131	0.0341964		1	831.991	0.00859409	831.983	0.0171882	832	2.06589e-05	2.12333e-05
		0.5679	4023	70	3953	140	4093	0.0342047	0.0341964		1	832.991	0.00860466	832.983	0.0172093	833	2.06595e-05	2.12333e-05
		0.5671	4024	70	3954	140	4094	0.0341964	0.0341964		1	833.991	0.00861524	833.983	0.0172305	834	2.06601e-05	2.12333e-05
		0.5669	4024	71	3953	142	4095	0.0346764	0.0346764		1	834.991	0.00862583	834.983	0.0172517	835	2.06607e-05	2.12333e-05
		0.5668	4024	72	3952	144	4096	0.0351563	0.035122		1	835.991	0.00863641	835.983	0.0172728	836	2.06613e-05	2.12333e-05
		0.566	4025	72	3953	144	4097	0.0351477	0.035122		1	836.991	0.008647	836.983	0.017294	837	2.06619e-05	2.12333e-05
		0.5635	4026	72	3954	144	4098	0.0351391	0.035122		1	837.991	0.00865759	837.983	0.0173152	838	2.06625e-05	2.12333e-05
		0.5633	4027	72	3955	144	4099	0.0351305	0.035122		1	838.991	0.00866819	838.983	0.0173364	839	2.06631e-05	2.12333e-05
		0.5623	4028	72	3956	144	4100	0.035122	0.035122		1	839.991	0.00867879	839.983	0.0173576	840	2.06638e-05	2.12333e-05
		0.5617	4028	73	3955	146	4101	0.0356011	0.0355404		1	840.991	0.0086894	840.983	0.0173788	841	2.06644e-05	2.12333e-05
		0.5614	4029	73	3956	146	4102	0.0355924	0.0355404		1	841.991	0.0087	841.983	0.0174	842	2.06651e-05	2.12333e-05
		0.5608	4030	73	3957	146	4103	0.0355837	0.0355404		1	842.991	0.00871061	842.983	0.0174212	843	2.06657e-05	2.12333e-05
		0.5601	4031	73	3958	146	4104	0.035575	0.0355404		1	843.991	0.00872123	843.983	0.0174425	844	2.06664e-05	2.12333e-05
		0.56	4032	73	3959	146	4105	0.0355664	0.0355404		1	844.991	0.00873185	844.983	0.0174637	845	2.06671e-05	2.12333e-05
		0.5599	4033	73	3960	146	4106	0.0355577	0.0355404		1	845.991	0.00874247	845.983	0.0174849	846	2.06678e-05	2.12333e-05
		0.5591	4034	73	3961	146	4107	0.0355491	0.0355404		1	846.991	0.0087531	846.982	0.0175062	847	2.06685e-05	2.12333e-05
		0.5582	4035	73	3962	146	4108	0.0355404	0.0355404		1	847.991	0.00876373	847.982	0.0175275	848	2.06692e-05	2.12333e-05
		0.5577	4035	74	3961	148	4109	0.0360185	0.0359398		1	848.991	0.00877436	848.982	0.0175487	849	2.06699e-05	2.12333e-05
		0.5567	4036	74	3962	148	4110	0.0360097	0.0359398		1	849.991	0.008785	849.982	0.01757	850	2.06706e-05	2.12333e-05
		0.5546	4037	74	3963	148	4111	0.036001	0.0359398		1	850.991	0.00879564	850.982	0.0175913	851	2.06713e-05	2.12333e-05
		0.5541	4038	74	3964	148	4112	0.0359922	0.0359398		1	851.991	0.00880628	851.982	0.0176126	852	2.0672e-05	2.12333e-05
		0.5538	4039	74	3965	148	4113	0.0359835	0.0359398		1	852.991	0.00881693	852.982	0.0176339	853	2.06728e-05	2.12333e-05
		0.5534	4041	74	3967	148	4115	0.035966	0.0359398		1	853.991	0.00882759	853.982	0.0176552	854	2.06735e-05	2.12333e-05
		0.5533	4042	74	3968	148	4116	0.0359572	0.0359398		1	854.991	0.00883825	854.982	0.0176765	855	2.06743e-05	2.12333e-05
		0.552	4043	74	3969	148	4117	0.0359485	0.0359398		1	855.991	0.00884891	855.982	0.0176978	856	2.0675e-05	2.12333e-05
		0.5513	4044	74	3970	148	4118	0.0359398	0.0359398		1	856.991	0.00885958	856.982	0.0177192	857	2.06758e-05	2.12333e-05
		0.5511	4044	75	3969	150	4119	0.0364166	0.0363725		1	857.991	0.00887025	857.982	0.0177405	858	2.06766e-05	2.12333e-05
		0.5501	4045	75	3970	150	4120	0.0364078	0.0363725		1	858.991	0.00888092	858.982	0.0177618	859	2.06774e-05	2.12333e-05
		0.5484	4046	75	3971	150	4121	0.0363989	0.0363725		1	859.991	0.0088916	859.982	0.0177832	860	2.06781e-05	2.12333e-05
		0.5468	4047	75	3972	150	4122	0.0363901	0.0363725		1	860.991	0.00890229	860.982	0.0178046	861	2.06789e-05	2.12333e-05
		0.5449	4048	75	3973	150	4123	0.0363813	0.0363725		1	861.991	0.00891298	861.982	0.017826	862	2.06798e-05	2.12333e-05
		0.5439	4049	75	3974	150	4124	0.0363725	0.0363725		1	862.991	0.00892367	862.982	0.0178473	863	2.06806e-05	2.12333e-05
		0.5435	4049	76	3973	152	4125	0.0368485	0.0368306		1	863.991	0.00893437	863.982	0.0178687	864	2.06814e-05	2.12333e-05
		0.5433	4050	76	3974	152	4126	0.0368396	0.0368306		1	864.991	0.00894507	864.982	0.0178901	865	2.06822e-05	2.12333e-05
		0.5417	4051	76	3975	152	4127	0.0368306	0.0368306		1	865.991	0.00895577	865.982	0.0179115	866	2.06831e-05	2.12333e-05
		0.5416	4051	77	3974	154	4128	0.0373062	0.0372972		1	866.991	0.00896649	866.982	0.017933	867	2.06839e-05	2.12333e-05
		0.5415	4052	77	3975	154	4129	0.0372972	0.0372972		1	867.991	0.0089772	867.982	0.0179544	868	2.06848e-05	2.12333e-05
		0.5414	4052	78	3974	156	4130	0.0377724	0.0377724		1	868.991	0.00898792	868.982	0.0179758	869	2.06857e-05	2.12333e-05
		0.5399	4052	79	3973	158	4131	0.0382474	0.0382289		1	869.991	0.00899865	869.982	0.0179973	870	2.06866e-05	2.12333e-05
		0.5394	4053	79	3974	158	4132	0.0382381	0.0382289		1	870.991	0.00900938	870.982	0.0180188	871	2.06874e-05	2.12333e-05
		0.5391	4054	79	3975	158	4133	0.0382289	0.0382289		1	871.991	0.00902012	871.982	0.0180402	872	2.06883e-05	2.12333e-05
		0.5375	4054	80	3974	160	4134	0.0387034	0.038666		1	872.991	0.00903086	872.982	0.0180617	873	2.06893e-05	2.12333e-05
		0.5356	4055	80	3975	160	4135	0.0386941	0.038666		1	873.991	0.0090416	873.982	0.0180832	874	2.06902e-05	2.12333e-05
		0.535	4056	80	3976	160	4136	0.0386847	0.038666		1	874.991	0.00905235	874.982	0.0181047	875	2.06911e-05	2.12333e-05
		0.5343	4057	80	3977	160	4137	0.0386754	0.038666		1	875.991	0.00906311	875.982	0.0181262	876	2.0692e-05	2.12333e-05
		0.5339	4058	80	3978	160	4138	0.038666	0.038666		1	876.991	0.00907387	876.982	0.0181477	877	2.0693e-05	2.12333e-05
		0.5336	4058	81	3977	162	4139	0.0391399	0.039121		1	877.991	0.00908464	877.982	0.0181693	878	2.06939e-05	2.12333e-05
		0.5331	4059	81	3978	162	4140	0.0391304	0.039121		1	878.991	0.00909541	878.982	0.0181908	879	2.06949e-05	2.12333e-05
		0.5324	4060	81	3979	162	4141	0.039121	0.039121		1	879.991	0.00910619	879.982	0.0182124	880	2.06959e-05	2.12333e-05
		0.532	4060	82	3978	164	4142	0.0395944	0.0395371		1	880.991	0.00911697	880.982	0.0182339	881	2.06969e-05	2.12333e-05
		0.5315	4061	82	3979	164	4143	0.0395848	0.0395371		1	881.991	0.00912776	881.982	0.0182555	882	2.06979e-05	2.12333e-05
		0.5296	4062	82	3980	164	4144	0.0395753	0.0395371		1	882.991	0.00913855	882.982	0.0182771	883	2.06989e-05	2.12333e-05
		0.5294	4063	82	3981	164	4145	0.0395657	0.0395371		1	883.991	0.00914935	883.982	0.0182987	884	2.06999e-05	2.12333e-05
		0.5287	4064	82	3982	164	4146	0.0395562	0.0395371		1	884.991	0.00916015	884.982	0.0183203	885	2.07009e-05	2.12333e-05
		0.5264	4065	82	3983	164	4147	0.0395467	0.0395371		1	885.991	0.00917096	885.982	0.0183419	886	2.0702e-05	2.12333e-05
		0.5262	4066	82	3984	164	4148	0.0395371	0.0395371		1	886.991	0.00918178	886.982	0.0183636	887	2.0703e-05	2.12333e-05
		0.5253	4066	83	3983	166	4149	0.0400096	0.0400096		1	887.991	0.0091926	887.982	0.0183852	888	2.07041e-05	2.12333e-05
		0.5236	4066	84	3982	168	4150	0.0404819	0.0404819		1	888.991	0.00920343	888.982	0.0184069	889	2.07051e-05	2.12333e-05
		0.5234	4067	85	3982	170	4152	0.0409441	0.0407869		1	889.991	0.00921426	889.982	0.0184285	890	2.07062e-05	2.12333e-05
		0.5225	4068	85	3983	170	4153	0.0409343	0.0407869		1	890.991	0.0092251	890.982	0.0184502	891	2.07073e-05	2.12333e-05
		0.522	4069	85	3984	170	4154	0.0409244	0.0407869		1	891.991	0.00923595	891.982	0.0184719	892	2.07084e-05	2.12333e-05
		0.5214	4070	85	3985	170	4155	0.0409146	0.0407869		1	892.991	0.0092468	892.982	0.0184936	893	2.07095e-05	2.12333e-05
		0.5211	4071	85	3986	170	4156	0.0409047	0.0407869		1	893.991	0.00925766	893.981	0.0185153	894	2.07106e-05	2.12333e-05
		0.5204	4072	85	3987	170	4157	0.0408949	0.0407869		1	894.991	0.00926852	894.981	0.018537	895	2.07118e-05	2.12333e-05
		0.5195	4073	85	3988	170	4158	0.040885	0.0407869		1	895.991	0.00927939	895.981	0.0185588	896	2.07129e-05	2.12333e-05
		0.5179	4074	85	3989	170	4159	0.0408752	0.0407869		1	896.991	0.00929027	896.981	0.0185805	897	2.07141e-05	2.12333e-05
		0.5178	4075	85	3990	170	4160	0.0408654	0.0407869		1	897.991	0.00930115	897.981	0.0186023	898	2.07153e-05	2.12333e-05
		0.5177	4077	85	3992	170	4162	0.0408457	0.0407869		1	898.991	0.00931204	898.981	0.0186241	899	2.07164e-05	2.12333e-05
		0.5156	4078	85	3993	170	4163	0.0408359	0.0407869		1	899.991	0.00932293	899.981	0.0186459	900	2.07176e-05	2.12333e-05
		0.514	4079	85	3994	170	4164	0.0408261	0.0407869		1	900.991	0.00933383	900.981	0.0186677	901	2.07188e-05	2.12333e-05
		0.5137	4080	85	3995	170	4165	0.0408163	0.0407869		1	901.991	0.00934474	901.981	0.0186895	902	2.07201e-05	2.12333e-05
		0.5135	4081	85	3996	170	4166	0.0408065	0.0407869		1	902.991	0.00935566	902.981	0.0187113	903	2.07213e-05	2.12333e-05
		0.5133	4082	85	3997	170	4167	0.0407967	0.0407869		1	903.991	0.00936658	903.981	0.0187332	904	2.07225e-05	2.12333e-05
		0.5127	4083	85	3998	170	4168	0.0407869	0.0407869		1	904.991	0.00937751	904.981	0.018755	905	2.07238e-05	2.12333e-05
		0.5123	4083	86	3997	172	4169	0.0412569	0.0412371		1	905.991	0.00938844	905.981	0.0187769	906	2.0725e-05	2.12333e-05
		0.5118	4084	86	3998	172	4170	0.041247	0.0412371		1	906.991	0.00939938	906.981	0.0187988	907	2.07263e-05	2.12333e-05
		0.5115	4085	86	3999	172	4171	0.0412371	0.0412371		1	907.991	0.00941033	907.981	0.0188207	908	2.07276e-05	2.12333e-05
		0.5114	4085	87	3998	174	4172	0.0417066	0.0416866		1	908.991	0.00942129	908.981	0.0188426	909	2.07289e-05	2.12333e-05
		0.5103	4086	87	3999	174	4173	0.0416966	0.0416866		1	909.991	0.00943225	909.981	0.0188645	910	2.07302e-05	2.12333e-05
		0.5097	4087	87	4000	174	4174	0.0416866	0.0416866		1	910.991	0.00944322	910.981	0.0188864	911	2.07316e-05	2.12333e-05
		0.5094	4087	88	3999	176	4175	0.0421557	0.042055		1	911.991	0.0094542	911.981	0.0189084	912	2.07329e-05	2.12333e-05
		0.5084	4089	88	4001	176	4177	0.0421355	0.042055		1	912.991	0.00946518	912.981	0.0189304	913	2.07342e-05	2.12333e-05
		0.508	4090	88	4002	176	4178	0.0421254	0.042055		1	913.991	0.00947618	913.981	0.0189524	914	2.07356e-05	2.12333e-05
		0.5078	4091	88	4003	176	4179	0.0421153	0.042055		1	914.991	0.00948718	914.981	0.0189744	915	2.0737e-05	2.12333e-05
		0.5054	4092	88	4004	176	4180	0.0421053	0.042055		1	915.991	0.00949818	915.981	0.0189964	916	2.07384e-05	2.12333e-05
		0.5052	4093	88	4005	176	4181	0.0420952	0.042055		1	916.99	0.0095092	916.981	0.0190184	917	2.07398e-05	2.12333e-05
		0.5029	4094	88	4006	176	4182	0.0420851	0.042055		1	917.99	0.00952022	917.981	0.0190404	918	2.07412e-05	2.12333e-05
		0.5023	4095	88	4007	176	4183	0.0420751	0.042055		1	918.99	0.00953125	918.981	0.0190625	919	2.07426e-05	2.12333e-05
		0.5022	4096	88	4008	176	4184	0.042065	0.042055		1	919.99	0.00954228	919.981	0.0190846	920	2.07441e-05	2.12333e-05
		0.5012	4097	88	4009	176	4185	0.042055	0.042055		1	920.99	0.00955333	920.981	0.0191067	921	2.07456e-05	2.12333e-05
		0.501	4097	89	4008	178	4186	0.0425227	0.0424922		1	921.99	0.00956438	921.981	0.0191288	922	2.0747e-05	2.12333e-05
		0.5005	4098	89	4009	178	4187	0.0425125	0.0424922		1	922.99	0.00957544	922.981	0.0191509	923	2.07485e-05	2.12333e-05
		0.4995	4099	89	4010	178	4188	0.0425024	0.0424922		1	923.99	0.00958651	923.981	0.019173	924	2.075e-05	2.12333e-05
		0.4993	4100	89	4011	178	4189	0.0424922	0.0424922		1	924.99	0.00959759	924.981	0.0191952	925	2.07515e-05	2.12333e-05
		0.4992	4100	90	4010	180	4190	0.0429594	0.0429594		1	925.99	0.00960867	925.981	0.0192173	926	2.07531e-05	2.12333e-05
		0.4984	4100	91	4009	182	4191	0.0434264	0.043416		1	926.99	0.00961976	926.981	0.0192395	927	2.07546e-05	2.12333e-05
		0.4973	4101	91	4010	182	4192	0.043416	0.043416		1	927.99	0.00963087	927.981	0.0192617	928	2.07562e-05	2.12333e-05
		0.4972	4101	92	4009	184	4193	0.0438827	0.0438722		1	928.99	0.00964198	928.981	0.019284	929	2.07578e-05	2.12333e-05
		0.4968	4102	92	4010	184	4194	0.0438722	0.0438722		1	929.99	0.00965309	929.981	0.0193062	930	2.07593e-05	2.12333e-05
		0.4962	4102	93	4009	186	4195	0.0443385	0.0443385		1	930.99	0.00966422	930.981	0.0193284	931	2.07609e-05	2.12333e-05
		0.4957	4102	94	4008	188	4196	0.0448046	0.0447832		1	931.99	0.00967535	931.981	0.0193507	932	2.07626e-05	2.12333e-05
		0.4954	4103	94	4009	188	4197	0.0447939	0.0447832		1	932.99	0.0096865	932.981	0.019373	933	2.07642e-05	2.12333e-05
		0.4939	4104	94	4010	188	4198	0.0447832	0.0447832		1	933.99	0.00969765	933.981	0.0193953	934	2.07658e-05	2.12333e-05
		0.4938	4104	95	4009	190	4199	0.0452489	0.0452381		1	934.99	0.00970881	934.981	0.0194176	935	2.07675e-05	2.12333e-05
		0.4936	4105	95	4010	190	4200	0.0452381	0.0452381		1	935.99	0.00971998	935.981	0.01944	936	2.07692e-05	2.12333e-05
		0.4926	4105	96	4009	192	4201	0.0457034	0.0456708		1	936.99	0.00973116	936.981	0.0194623	937	2.07709e-05	2.12333e-05
		0.4918	4106	96	4010	192	4202	0.0456925	0.0456708		1	937.99	0.00974235	937.981	0.0194847	938	2.07726e-05	2.12333e-05
		0.4907	4107	96	4011	192	4203	0.0456817	0.0456708		1	938.99	0.00975354	938.98	0.0195071	939	2.07743e-05	2.12333e-05
		0.49	4108	96	4012	192	4204	0.0456708	0.0456708		1	939.99	0.00976475	939.98	0.0195295	940	2.07761e-05	2.12333e-05
		0.4899	4108	97	4011	194	4205	0.0461356	0.0461246		1	940.99	0.00977596	940.98	0.0195519	941	2.07778e-05	2.12333e-05
		0.4898	4109	97	4012	194	4206	0.0461246	0.0461246		1	941.99	0.00978719	941.98	0.0195744	942	2.07796e-05	2.12333e-05
		0.4894	4109	98	4011	196	4207	0.046589	0.046589		1	942.99	0.00979842	942.98	0.0195968	943	2.07814e-05	2.12333e-05
		0.4893	4109	99	4010	198	4208	0.0470532	0.0470532		1	943.99	0.00980967	943.98	0.0196193	944	2.07832e-05	2.12333e-05
		0.4878	4109	100	4009	200	4209	0.0475172	0.0474947		1	944.99	0.00982092	944.98	0.0196418	945	2.0785e-05	2.12333e-05
		0.4854	4111	100	4011	200	4211	0.0474947	0.0474947		1	945.99	0.00983218	945.98	0.0196644	946	2.07868e-05	2.12333e-05
		0.4843	4111	101	4010	202	4212	0.0479582	0.0479468		1	946.99	0.00984345	946.98	0.0196869	947	2.07887e-05	2.12333e-05
		0.4835	4112	101	4011	202	4213	0.0479468	0.0479468		1	947.99	0.00985473	947.98	0.0197095	948	2.07906e-05	2.12333e-05
		0.4824	4112	102	4010	204	4214	0.0484101	0.0484101		1	948.99	0.00986602	948.98	0.019732	949	2.07925e-05	2.12333e-05
		0.4816	4112	103	4009	206	4215	0.0488731	0.0487459		1	949.99	0.00987733	949.98	0.0197547	950	2.07944e-05	2.12333e-05
		0.4813	4113	103	4010	206	4216	0.0488615	0.0487459		1	950.99	0.00988864	950.98	0.0197773	951	2.07963e-05	2.12333e-05
		0.481	4114	103	4011	206	4217	0.0488499	0.0487459		1	951.99	0.00989996	951.98	0.0197999	952	2.07982e-05	2.12333e-05
		0.4807	4115	103	4012	206	4218	0.0488383	0.0487459		1	952.99	0.00991129	952.98	0.0198226	953	2.08002e-05	2.12333e-05
		0.4806	4116	103	4013	206	4219	0.0488267	0.0487459		1	953.99	0.00992263	953.98	0.0198453	954	2.08022e-05	2.12333e-05
		0.4785	4118	103	4015	206	4221	0.0488036	0.0487459		1	954.99	0.00993398	954.98	0.019868	955	2.08042e-05	2.12333e-05
		0.4779	4120	103	4017	206	4223	0.0487805	0.0487459		1	955.99	0.00994535	955.98	0.0198907	956	2.08062e-05	2.12333e-05
		0.4773	4121	103	4018	206	4224	0.0487689	0.0487459		1	956.99	0.00995672	956.98	0.0199134	957	2.08082e-05	2.12333e-05
		0.477	4122	103	4019	206	4225	0.0487574	0.0487459		1	957.99	0.0099681	957.98	0.0199362	958	2.08102e-05	2.12333e-05
		0.4762	4123	103	4020	206	4226	0.0487459	0.0487459		1	958.99	0.0099795	958.98	0.019959	959	2.08123e-05	2.12333e-05
		0.4753	4123	104	4019	208	4227	0.0492075	0.0491493		1	959.99	0.0099909	959.98	0.0199818	960	2.08144e-05	2.12333e-05
		0.474	4124	104	4020	208	4228	0.0491958	0.0491493		1	960.99	0.0100023	960.98	0.0200046	961	2.08165e-05	2.12333e-05
		0.4735	4125	104	4021	208	4229	0.0491842	0.0491493		1	961.99	0.0100137	961.98	0.0200275	962	2.08186e-05	2.12333e-05
		0.4734	4126	104	4022	208	4230	0.0491726	0.0491493		1	962.99	0.0100252	962.98	0.0200504	963	2.08207e-05	2.12333e-05
		0.473	4127	104	4023	208	4231	0.049161	0.0491493		1	963.99	0.0100366	963.98	0.0200733	964	2.08229e-05	2.12333e-05
		0.4712	4128	104	4024	208	4232	0.0491493	0.0491493		1	964.99	0.0100481	964.98	0.0200962	965	2.08251e-05	2.12333e-05
		0.4708	4128	105	4023	210	4233	0.0496102	0.0495634		1	965.99	0.0100596	965.98	0.0201191	966	2.08273e-05	2.12333e-05
		0.4705	4129	105	4024	210	4234	0.0495985	0.0495634		1	966.99	0.010071	966.98	0.0201421	967	2.08295e-05	2.12333e-05
		0.4704	4130	105	4025	210	4235	0.0495868	0.0495634		1	967.99	0.0100825	967.98	0.0201651	968	2.08317e-05	2.12333e-05
		0.4697	4131	105	4026	210	4236	0.0495751	0.0495634		1	968.99	0.010094	968.98	0.0201881	969	2.08339e-05	2.12333e-05
		0.4695	4132	105	4027	210	4237	0.0495634	0.0495634		1	969.99	0.0101056	969.98	0.0202111	970	2.08362e-05	2.12333e-05
		0.4686	4132	106	4026	212	4238	0.0500236	0.0499882		1	970.99	0.0101171	970.98	0.0202342	971	2.08385e-05	2.12333e-05
		0.468	4133	106	4027	212	4239	0.0500118	0.0499882		1	971.99	0.0101286	971.98	0.0202573	972	2.08408e-05	2.12333e-05
		0.4669	4134	106	4028	212	4240	0.05	0.0499882		1	972.99	0.0101402	972.98	0.0202804	973	2.08431e-05	2.12333e-05
		0.4663	4135	106	4029	212	4241	0.0499882	0.0499882		1	973.99	0.0101517	973.98	0.0203035	974	2.08455e-05	2.12333e-05
		0.466	4135	107	4028	214	4242	0.0504479	0.0504479		1	974.99	0.0101633	974.98	0.0203266	975	2.08478e-05	2.12333e-05
		0.4641	4135	108	4027	216	4243	0.0509074	0.0509074		1	975.99	0.0101749	975.98	0.0203498	976	2.08502e-05	2.12333e-05
		0.4637	4135	109	4026	218	4244	0.0513666	0.0513304		1	976.99	0.0101865	976.98	0.020373	977	2.08526e-05	2.12333e-05
		0.4626	4136	109	4027	218	4245	0.0513545	0.0513304		1	977.99	0.0101981	977.98	0.0203963	978	2.08551e-05	2.12333e-05
		0.4619	4138	109	4029	218	4247	0.0513304	0.0513304		1	978.99	0.0102098	978.98	0.0204195	979	2.08575e-05	2.12333e-05
		0.4616	4138	110	4028	220	4248	0.0517891	0.0517891		1	979.99	0.0102214	979.98	0.0204428	980	2.086e-05	2.12333e-05
		0.4605	4138	111	4027	222	4249	0.0522476	0.0521739		1	980.99	0.010233	980.98	0.0204661	981	2.08625e-05	2.12333e-05
		0.4591	4139	111	4028	222	4250	0.0522353	0.0521739		1	981.99	0.0102447	981.98	0.0204894	982	2.0865e-05	2.12333e-05
		0.4584	4140	111	4029	222	4251	0.052223	0.0521739		1	982.99	0.0102564	982.979	0.0205128	983	2.08675e-05	2.12333e-05
		0.4581	4141	111	4030	222	4252	0.0522107	0.0521739		1	983.99	0.0102681	983.979	0.0205361	984	2.08701e-05	2.12333e-05
		0.4569	4143	111	4032	222	4254	0.0521862	0.0521739		1	984.99	0.0102798	984.979	0.0205595	985	2.08726e-05	2.12333e-05
		0.4563	4144	111	4033	222	4255	0.0521739	0.0521739		1	985.99	0.0102915	985.979	0.020583	986	2.08752e-05	2.12333e-05
		0.4562	4144	112	4032	224	4256	0.0526316	0.0526316		1	986.99	0.0103032	986.979	0.0206064	987	2.08778e-05	2.12333e-05
		0.4556	4144	113	4031	226	4257	0.053089	0.0530392		1	987.99	0.010315	987.979	0.0206299	988	2.08805e-05	2.12333e-05
		0.4552	4145	113	4032	226	4258	0.0530766	0.0530392		1	988.99	0.0103267	988.979	0.0206534	989	2.08831e-05	2.12333e-05
		0.4527	4146	113	4033	226	4259	0.0530641	0.0530392		1	989.99	0.0103385	989.979	0.020677	990	2.08858e-05	2.12333e-05
		0.4512	4147	113	4034	226	4260	0.0530516	0.0530392		1	990.99	0.0103503	990.979	0.0207005	991	2.08885e-05	2.12333e-05
		0.4511	4148	113	4035	226	4261	0.0530392	0.0530392		1	991.99	0.0103621	991.979	0.0207241	992	2.08912e-05	2.12333e-05
		0.4508	4150	114	4036	228	4264	0.0534709	0.0534459		1	992.99	0.0103739	992.979	0.0207477	993	2.0894e-05	2.12333e-05
		0.4496	4151	114	4037	228	4265	0.0534584	0.0534459		1	993.99	0.0103857	993.979	0.0207714	994	2.08968e-05	2.12333e-05
		0.448	4152	114	4038	228	4266	0.0534459	0.0534459		1	994.99	0.0103975	994.979	0.0207951	995	2.08996e-05	2.12333e-05
		0.4476	4152	115	4037	230	4267	0.053902	0.053839		1	995.99	0.0104094	995.979	0.0208188	996	2.09024e-05	2.12333e-05
		0.4462	4153	115	4038	230	4268	0.0538894	0.053839		1	996.99	0.0104212	996.979	0.0208425	997	2.09052e-05	2.12333e-05
		0.4455	4154	115	4039	230	4269	0.0538768	0.053839		1	997.99	0.0104331	997.979	0.0208663	998	2.09081e-05	2.12333e-05
		0.4439	4155	115	4040	230	4270	0.0538642	0.053839		1	998.99	0.010445	998.979	0.02089	999	2.0911e-05	2.12333e-05
		0.4437	4156	115	4041	230	4271	0.0538516	0.053839		1	999.99	0.0104569	999.979	0.0209139	1000	2.09139e-05	2.12333e-05
		0.4428	4157	115	4042	230	4272	0.053839	0.053839		1	1000.99	0.0104689	1000.98	0.0209377	1001	2.09168e-05	2.12333e-05
		0.4427	4157	116	4041	232	4273	0.0542944	0.0542944		1	1001.99	0.0104808	1001.98	0.0209616	1002	2.09197e-05	2.12333e-05
		0.4425	4157	117	4040	234	4274	0.0547496	0.0547496		1	1002.99	0.0104927	1002.98	0.0209855	1003	2.09227e-05	2.12333e-05
		0.4424	4157	118	4039	236	4275	0.0552047	0.0552047		1	1003.99	0.0105047	1003.98	0.0210094	1004	2.09257e-05	2.12333e-05
		0.4408	4157	119	4038	238	4276	0.0556595	0.0556465		1	1004.99	0.0105167	1004.98	0.0210334	1005	2.09287e-05	2.12333e-05
		0.4403	4158	119	4039	238	4277	0.0556465	0.0556465		1	1005.99	0.0105287	1005.98	0.0210574	1006	2.09318e-05	2.12333e-05
		0.4402	4158	120	4038	240	4278	0.056101	0.0558529		1	1006.99	0.0105407	1006.98	0.0210814	1007	2.09349e-05	2.12333e-05
		0.4392	4159	120	4039	240	4279	0.0560879	0.0558529		1	1007.99	0.0105527	1007.98	0.0211055	1008	2.0938e-05	2.12333e-05
		0.4381	4160	120	4040	240	4280	0.0560748	0.0558529		1	1008.99	0.0105648	1008.98	0.0211296	1009	2.09411e-05	2.12333e-05
		0.4374	4161	120	4041	240	4281	0.0560617	0.0558529		1	1009.99	0.0105768	1009.98	0.0211537	1010	2.09442e-05	2.12333e-05
		0.4371	4162	120	4042	240	4282	0.0560486	0.0558529		1	1010.99	0.0105889	1010.98	0.0211778	1011	2.09474e-05	2.12333e-05
		0.4368	4163	120	4043	240	4283	0.0560355	0.0558529		1	1011.99	0.010601	1011.98	0.021202	1012	2.09506e-05	2.12333e-05
		0.4365	4164	120	4044	240	4284	0.0560224	0.0558529		1	1012.99	0.0106131	1012.98	0.0212262	1013	2.09538e-05	2.12333e-05
		0.4364	4165	120	4045	240	4285	0.0560093	0.0558529		1	1013.99	0.0106252	1013.98	0.0212505	1014	2.09571e-05	2.12333e-05
		0.4359	4166	120	4046	240	4286	0.0559963	0.0558529		1	1014.99	0.0106374	1014.98	0.0212748	1015	2.09603e-05	2.12333e-05
		0.4329	4167	120	4047	240	4287	0.0559832	0.0558529		1	1015.99	0.0106495	1015.98	0.0212991	1016	2.09636e-05	2.12333e-05
		0.4328	4168	120	4048	240	4288	0.0559701	0.0558529		1	1016.99	0.0106617	1016.98	0.0213234	1017	2.0967e-05	2.12333e-05
		0.4327	4169	120	4049	240	4289	0.0559571	0.0558529		1	1017.99	0.0106739	1017.98	0.0213478	1018	2.09703e-05	2.12333e-05
		0.4321	4170	120	4050	240	4290	0.0559441	0.0558529		1	1018.99	0.0106861	1018.98	0.0213722	1019	2.09737e-05	2.12333e-05
		0.4317	4171	120	4051	240	4291	0.055931	0.0558529		1	1019.99	0.0106983	1019.98	0.0213966	1020	2.09771e-05	2.12333e-05
		0.4311	4172	120	4052	240	4292	0.055918	0.0558529		1	1020.99	0.0107106	1020.98	0.0214211	1021	2.09805e-05	2.12333e-05
		0.431	4173	120	4053	240	4293	0.055905	0.0558529		1	1021.99	0.0107228	1021.98	0.0214456	1022	2.0984e-05	2.12333e-05
		0.4307	4174	120	4054	240	4294	0.0558919	0.0558529		1	1022.99	0.0107351	1022.98	0.0214702	1023	2.09875e-05	2.12333e-05
		0.4303	4175	120	4055	240	4295	0.0558789	0.0558529		1	1023.99	0.0107474	1023.98	0.0214948	1024	2.0991e-05	2.12333e-05
		0.4302	4176	120	4056	240	4296	0.0558659	0.0558529		1	1024.99	0.0107597	1024.98	0.0215194	1025	2.09945e-05	2.12333e-05
		0.43	4177	120	4057	240	4297	0.0558529	0.0558529		1	1025.99	0.010772	1025.98	0.021544	1026	2.09981e-05	2.12333e-05
		0.4293	4177	121	4056	242	4298	0.0563053	0.056266		1	1026.99	0.0107843	1026.98	0.0215687	1027	2.10017e-05	2.12333e-05
		0.4286	4178	121	4057	242	4299	0.0562922	0.056266		1	1027.99	0.0107967	1027.98	0.0215934	1028	2.10053e-05	2.12333e-05
		0.4275	4179	121	4058	242	4300	0.0562791	0.056266		1	1028.99	0.0108091	1028.98	0.0216182	1029	2.10089e-05	2.12333e-05
		0.4269	4180	121	4059	242	4301	0.056266	0.056266		1	1029.99	0.0108215	1029.98	0.021643	1030	2.10126e-05	2.12333e-05
		0.4268	4181	122	4059	244	4303	0.0567046	0.0566651		1	1030.99	0.0108339	1030.98	0.0216678	1031	2.10163e-05	2.12333e-05
		0.4262	4182	122	4060	244	4304	0.0566914	0.0566651		1	1031.99	0.0108463	1031.98	0.0216926	1032	2.102e-05	2.12333e-05
		0.4254	4183	122	4061	244	4305	0.0566783	0.0566651		1	1032.99	0.0108588	1032.98	0.0217175	1033	2.10238e-05	2.12333e-05
		0.4238	4184	122	4062	244	4306	0.0566651	0.0566651		1	1033.99	0.0108712	1033.98	0.0217425	1034	2.10275e-05	2.12333e-05
		0.4234	4184	123	4061	246	4307	0.0571163	0.0571031		1	1034.99	0.0108837	1034.98	0.0217675	1035	2.10314e-05	2.12333e-05
		0.4229	4185	123	4062	246	4308	0.0571031	0.0571031		1	1035.99	0.0108962	1035.98	0.0217925	1036	2.10352e-05	2.12333e-05
		0.4214	4185	124	4061	248	4309	0.057554	0.0575139		1	1036.99	0.0109088	1036.98	0.0218175	1037	2.10391e-05	2.12333e-05
		0.421	4186	124	4062	248	4310	0.0575406	0.0575139		1	1037.99	0.0109213	1037.98	0.0218426	1038	2.1043e-05	2.12333e-05
		0.4206	4187	124	4063	248	4311	0.0575273	0.0575139		1	1038.99	0.0109339	1038.98	0.0218677	1039	2.10469e-05	2.12333e-05
		0.4205	4188	124	4064	248	4312	0.0575139	0.0575139		1	1039.99	0.0109464	1039.98	0.0218929	1040	2.10508e-05	2.12333e-05
		0.4191	4188	125	4063	250	4313	0.0579643	0.057924		1	1040.99	0.010959	1040.98	0.0219181	1041	2.10548e-05	2.12333e-05
		0.4187	4189	125	4064	250	4314	0.0579509	0.057924		1	1041.99	0.0109717	1041.98	0.0219433	1042	2.10588e-05	2.12333e-05
		0.4186	4190	125	4065	250	4315	0.0579374	0.057924		1	1042.99	0.0109843	1042.98	0.0219686	1043	2.10629e-05	2.12333e-05
		0.4182	4191	125	4066	250	4316	0.057924	0.057924		1	1043.99	0.010997	1043.98	0.0219939	1044	2.1067e-05	2.12333e-05
		0.4178	4191	126	4065	252	4317	0.0583739	0.0582794		1	1044.99	0.0110096	1044.98	0.0220193	1045	2.10711e-05	2.12333e-05
		0.4166	4192	126	4066	252	4318	0.0583604	0.0582794		1	1045.99	0.0110223	1045.98	0.0220447	1046	2.10752e-05	2.12333e-05
		0.4161	4193	126	4067	252	4319	0.0583468	0.0582794		1	1046.99	0.011035	1046.98	0.0220701	1047	2.10794e-05	2.12333e-05
		0.416	4194	126	4068	252	4320	0.0583333	0.0582794		1	1047.99	0.0110478	1047.98	0.0220956	1048	2.10836e-05	2.12333e-05
		0.4158	4195	126	4069	252	4321	0.0583198	0.0582794		1	1048.99	0.0110605	1048.98	0.0221211	1049	2.10878e-05	2.12333e-05
		0.4153	4196	126	4070	252	4322	0.0583063	0.0582794		1	1049.99	0.0110733	1049.98	0.0221466	1050	2.1092e-05	2.12333e-05
		0.4148	4197	126	4071	252	4323	0.0582929	0.0582794		1	1050.99	0.0110861	1050.98	0.0221722	1051	2.10963e-05	2.12333e-05
		0.414	4198	126	4072	252	4324	0.0582794	0.0582794		1	1051.99	0.0110989	1051.98	0.0221979	1052	2.11006e-05	2.12333e-05
		0.4136	4198	127	4071	254	4325	0.0587283	0.0586741		1	1052.99	0.0111118	1052.98	0.0222235	1053	2.1105e-05	2.12333e-05
		0.4129	4199	127	4072	254	4326	0.0587147	0.0586741		1	1053.99	0.0111246	1053.98	0.0222493	1054	2.11094e-05	2.12333e-05
		0.4119	4200	127	4073	254	4327	0.0587012	0.0586741		1	1054.99	0.0111375	1054.98	0.022275	1055	2.11138e-05	2.12333e-05
		0.4118	4201	127	4074	254	4328	0.0586876	0.0586741		1	1055.99	0.0111504	1055.98	0.0223008	1056	2.11182e-05	2.12333e-05
		0.4113	4202	127	4075	254	4329	0.0586741	0.0586741		1	1056.99	0.0111633	1056.98	0.0223267	1057	2.11227e-05	2.12333e-05
		0.4112	4203	128	4075	256	4331	0.0591088	0.0591088		1	1057.99	0.0111763	1057.98	0.0223526	1058	2.11272e-05	2.12333e-05
		0.4109	4204	129	4075	258	4333	0.059543	0.0595293		1	1058.99	0.0111893	1058.98	0.0223785	1059	2.11317e-05	2.12333e-05
		0.4102	4205	129	4076	258	4334	0.0595293	0.0595293		1	1059.99	0.0112022	1059.98	0.0224045	1060	2.11363e-05	2.12333e-05
		0.409	4205	130	4075	260	4335	0.0599769	0.0599769		1	1060.99	0.0112153	1060.98	0.0224305	1061	2.11409e-05	2.12333e-05
		0.4077	4205	131	4074	262	4336	0.0604244	0.0603826		1	1061.99	0.0112283	1061.98	0.0224566	1062	2.11455e-05	2.12333e-05
		0.4075	4206	131	4075	262	4337	0.0604104	0.0603826		1	1062.99	0.0112413	1062.98	0.0224827	1063	2.11502e-05	2.12333e-05
		0.4072	4207	131	4076	262	4338	0.0603965	0.0603826		1	1063.99	0.0112544	1063.98	0.0225088	1064	2.11549e-05	2.12333e-05
		0.4066	4208	131	4077	262	4339	0.0603826	0.0603826		1	1064.99	0.0112675	1064.98	0.022535	1065	2.11597e-05	2.12333e-05
		0.4061	4208	132	4076	264	4340	0.0608295	0.0608295		1	1065.99	0.0112806	1065.98	0.0225613	1066	2.11644e-05	2.12333e-05
		0.4058	4208	133	4075	266	4341	0.0612762	0.0611354		1	1066.99	0.0112938	1066.98	0.0225876	1067	2.11692e-05	2.12333e-05
		0.4043	4209	133	4076	266	4342	0.0612621	0.0611354		1	1067.99	0.0113069	1067.98	0.0226139	1068	2.11741e-05	2.12333e-05
		0.4036	4210	133	4077	266	4343	0.061248	0.0611354		1	1068.99	0.0113201	1068.98	0.0226403	1069	2.11789e-05	2.12333e-05
		0.4034	4211	133	4078	266	4344	0.0612339	0.0611354		1	1069.99	0.0113334	1069.98	0.0226667	1070	2.11838e-05	2.12333e-05
		0.4033	4212	133	4079	266	4345	0.0612198	0.0611354		1	1070.99	0.0113466	1070.98	0.0226932	1071	2.11888e-05	2.12333e-05
		0.4022	4213	133	4080	266	4346	0.0612057	0.0611354		1	1071.99	0.0113598	1071.98	0.0227197	1072	2.11937e-05	2.12333e-05
		0.4017	4214	133	4081	266	4347	0.0611916	0.0611354		1	1072.99	0.0113731	1072.98	0.0227463	1073	2.11988e-05	2.12333e-05
		0.4008	4216	133	4083	266	4349	0.0611635	0.0611354		1	1073.99	0.0113864	1073.98	0.0227729	1074	2.12038e-05	2.12333e-05
		0.4005	4217	133	4084	266	4350	0.0611494	0.0611354		1	1074.99	0.0113998	1074.98	0.0227995	1075	2.12089e-05	2.12333e-05
		0.4	4218	133	4085	266	4351	0.0611354	0.0611354		1	1075.99	0.0114131	1075.98	0.0228262	1076	2.1214e-05	2.12333e-05
		0.3999	4218	135	4083	270	4353	0.0620262	0.0619124		1	1076.99	0.0114265	1076.98	0.022853	1077	2.12191e-05	2.12333e-05
		0.3982	4219	135	4084	270	4354	0.0620119	0.0619124		1	1077.99	0.0114399	1077.98	0.0228798	1078	2.12243e-05	2.12333e-05
		0.3978	4220	135	4085	270	4355	0.0619977	0.0619124		1	1078.99	0.0114533	1078.98	0.0229067	1079	2.12295e-05	2.12333e-05
		0.3977	4222	135	4087	270	4357	0.0619692	0.0619124		1	1079.99	0.0114668	1079.98	0.0229336	1080	2.12348e-05	2.12333e-05
		0.3974	4223	135	4088	270	4358	0.061955	0.0619124		1	1080.99	0.0114803	1080.98	0.0229605	1081	2.12401e-05	2.12333e-05
		0.3964	4224	135	4089	270	4359	0.0619408	0.0619124		1	1081.99	0.0114938	1081.98	0.0229875	1082	2.12454e-05	2.12333e-05
		0.3961	4225	135	4090	270	4360	0.0619266	0.0619124		1	1082.99	0.0115073	1082.98	0.0230146	1083	2.12508e-05	2.12333e-05
		0.3951	4226	135	4091	270	4361	0.0619124	0.0619124		1	1083.99	0.0115208	1083.98	0.0230417	1084	2.12561e-05	2.12333e-05
		0.3943	4226	136	4090	272	4362	0.0623567	0.0623424		1	1084.99	0.0115344	1084.98	0.0230688	1085	2.12616e-05	2.12333e-05
		0.3939	4227	136	4091	272	4363	0.0623424	0.0623424		1	1085.99	0.011548	1085.98	0.023096	1086	2.12671e-05	2.12333e-05
		0.3935	4227	137	4090	274	4364	0.0627864	0.0627864		1	1086.99	0.0115616	1086.98	0.0231233	1087	2.12726e-05	2.12333e-05
		0.3931	4227	138	4089	276	4365	0.0632302	0.0632013		1	1087.99	0.0115753	1087.98	0.0231506	1088	2.12781e-05	2.12333e-05
		0.3926	4228	138	4090	276	4366	0.0632158	0.0632013		1	1088.99	0.011589	1088.98	0.0231779	1089	2.12837e-05	2.12333e-05
		0.3913	4229	138	4091	276	4367	0.0632013	0.0632013		1	1089.99	0.0116027	1089.98	0.0232053	1090	2.12893e-05	2.12333e-05
		0.391	4229	139	4090	278	4368	0.0636447	0.0635865		1	1090.99	0.0116164	1090.98	0.0232328	1091	2.1295e-05	2.12333e-05
		0.3909	4230	139	4091	278	4369	0.0636301	0.0635865		1	1091.99	0.0116302	1091.98	0.0232603	1092	2.13007e-05	2.12333e-05
		0.3905	4231	139	4092	278	4370	0.0636156	0.0635865		1	1092.99	0.0116439	1092.98	0.0232879	1093	2.13064e-05	2.12333e-05
		0.3896	4232	139	4093	278	4371	0.063601	0.0635865		1	1093.99	0.0116578	1093.98	0.0233155	1094	2.13122e-05	2.12333e-05
		0.3895	4233	139	4094	278	4372	0.0635865	0.0635865		1	1094.99	0.0116716	1094.98	0.0233432	1095	2.1318e-05	2.12333e-05
		0.3893	4233	140	4093	280	4373	0.0640293	0.0640293		1	1095.99	0.0116855	1095.98	0.0233709	1096	2.13238e-05	2.12333e-05
		0.3885	4233	142	4091	284	4375	0.0649143	0.0649143		1	1096.99	0.0116993	1096.98	0.0233987	1097	2.13297e-05	2.12333e-05
		0.3884	4233	144	4089	288	4377	0.0657985	0.0657534		1	1097.99	0.0117133	1097.98	0.0234265	1098	2.13356e-05	2.12333e-05
		0.3871	4234	144	4090	288	4378	0.0657835	0.0657534		1	1098.99	0.0117272	1098.98	0.0234544	1099	2.13416e-05	2.12333e-05
		0.3869	4235	144	4091	288	4379	0.0657684	0.0657534		1	1099.99	0.0117412	1099.98	0.0234824	1100	2.13476e-05	2.12333e-05
		0.3862	4236	144	4092	288	4380	0.0657534	0.0657534		1	1100.99	0.0117552	1100.98	0.0235104	1101	2.13536e-05	2.12333e-05
		0.3852	4236	145	4091	290	4381	0.0661949	0.0661798		1	1101.99	0.0117692	1101.98	0.0235384	1102	2.13597e-05	2.12333e-05
		0.3847	4237	145	4092	290	4382	0.0661798	0.0661798		1	1102.99	0.0117833	1102.98	0.0235665	1103	2.13658e-05	2.12333e-05
		0.3844	4237	146	4091	292	4383	0.066621	0.0666058		1	1103.99	0.0117973	1103.98	0.0235947	1104	2.1372e-05	2.12333e-05
		0.3843	4238	146	4092	292	4384	0.0666058	0.0666058		1	1104.99	0.0118115	1104.98	0.0236229	1105	2.13782e-05	2.12333e-05
		0.3838	4238	147	4091	294	4385	0.0670468	0.0670468		1	1105.99	0.0118256	1105.98	0.0236512	1106	2.13845e-05	2.12333e-05
		0.3816	4238	148	4090	296	4386	0.0674875	0.0674875		1	1106.99	0.0118398	1106.98	0.0236795	1107	2.13907e-05	2.12333e-05
		0.3814	4238	149	4089	298	4387	0.067928	0.067897		1	1107.99	0.011854	1107.98	0.0237079	1108	2.13971e-05	2.12333e-05
		0.3803	4240	149	4091	298	4389	0.067897	0.067897		1	1108.99	0.0118682	1108.98	0.0237364	1109	2.14034e-05	2.12333e-05
		0.3802	4240	150	4090	300	4390	0.0683371	0.0683216		1	1109.99	0.0118825	1109.98	0.0237649	1110	2.14098e-05	2.12333e-05
		0.3796	4241	150	4091	300	4391	0.0683216	0.0683216		1	1110.99	0.0118967	1110.98	0.0237935	1111	2.14163e-05	2.12333e-05
		0.3791	4241	151	4090	302	4392	0.0687614	0.0687457		1	1111.99	0.0119111	1111.98	0.0238221	1112	2.14228e-05	2.12333e-05
		0.3786	4242	151	4091	302	4393	0.0687457	0.0687457		1	1112.99	0.0119254	1112.98	0.0238508	1113	2.14293e-05	2.12333e-05
		0.3781	4242	152	4090	304	4394	0.0691853	0.0690752		1	1113.99	0.0119398	1113.98	0.0238796	1114	2.14359e-05	2.12333e-05
		0.3773	4243	152	4091	304	4395	0.0691695	0.0690752		1	1114.99	0.0119542	1114.98	0.0239084	1115	2.14425e-05	2.12333e-05
		0.3756	4244	152	4092	304	4396	0.0691538	0.0690752		1	1115.99	0.0119686	1115.98	0.0239372	1116	2.14491e-05	2.12333e-05
		0.3753	4245	152	4093	304	4397	0.069138	0.0690752		1	1116.99	0.0119831	1116.98	0.0239662	1117	2.14558e-05	2.12333e-05
		0.3749	4246	152	4094	304	4398	0.0691223	0.0690752		1	1117.99	0.0119976	1117.98	0.0239952	1118	2.14626e-05	2.12333e-05
		0.3745	4247	152	4095	304	4399	0.0691066	0.0690752		1	1118.99	0.0120121	1118.98	0.0240242	1119	2.14694e-05	2.12333e-05
		0.3741	4248	152	4096	304	4400	0.0690909	0.0690752		1	1119.99	0.0120267	1119.98	0.0240533	1120	2.14762e-05	2.12333e-05
		0.3739	4249	152	4097	304	4401	0.0690752	0.0690752		1	1120.99	0.0120413	1120.98	0.0240825	1121	2.14831e-05	2.12333e-05
		0.3737	4249	153	4096	306	4402	0.0695139	0.0695139		1	1121.99	0.0120559	1121.98	0.0241117	1122	2.149e-05	2.12333e-05
		0.3733	4249	154	4095	308	4403	0.0699523	0.0699364		1	1122.99	0.0120705	1122.98	0.024141	1123	2.14969e-05	2.12333e-05
		0.3732	4250	154	4096	308	4404	0.0699364	0.0699364		1	1123.99	0.0120852	1123.98	0.0241704	1124	2.15039e-05	2.12333e-05
		0.3721	4250	155	4095	310	4405	0.0703746	0.0703107		1	1124.99	0.0120999	1124.98	0.0241998	1125	2.1511e-05	2.12333e-05
		0.3718	4251	155	4096	310	4406	0.0703586	0.0703107		1	1125.99	0.0121147	1125.98	0.0242293	1126	2.1518e-05	2.12333e-05
		0.3717	4252	155	4097	310	4407	0.0703426	0.0703107		1	1126.99	0.0121294	1126.98	0.0242589	1127	2.15252e-05	2.12333e-05
		0.3715	4254	155	4099	310	4409	0.0703107	0.0703107		1	1127.99	0.0121442	1127.98	0.0242885	1128	2.15324e-05	2.12333e-05
		0.3714	4254	156	4098	312	4410	0.0707483	0.0707002		1	1128.99	0.0121591	1128.98	0.0243182	1129	2.15396e-05	2.12333e-05
		0.3703	4255	156	4099	312	4411	0.0707323	0.0707002		1	1129.99	0.012174	1129.98	0.0243479	1130	2.15468e-05	2.12333e-05
		0.3702	4256	156	4100	312	4412	0.0707162	0.0707002		1	1130.99	0.0121889	1130.98	0.0243777	1131	2.15542e-05	2.12333e-05
		0.3692	4257	156	4101	312	4413	0.0707002	0.0707002		1	1131.99	0.0122038	1131.98	0.0244076	1132	2.15615e-05	2.12333e-05
		0.3688	4257	157	4100	314	4414	0.0711373	0.0711212		1	1132.99	0.0122188	1132.98	0.0244376	1133	2.15689e-05	2.12333e-05
		0.3676	4258	157	4101	314	4415	0.0711212	0.0711212		1	1133.99	0.0122338	1133.98	0.0244676	1134	2.15764e-05	2.12333e-05
		0.3667	4258	158	4100	316	4416	0.071558	0.0713802		1	1134.99	0.0122488	1134.98	0.0244977	1135	2.15838e-05	2.12333e-05
		0.3664	4259	158	4101	316	4417	0.0715418	0.0713802		1	1135.99	0.0122639	1135.98	0.0245278	1136	2.15914e-05	2.12333e-05
		0.3662	4260	158	4102	316	4418	0.0715256	0.0713802		1	1136.99	0.012279	1136.98	0.024558	1137	2.1599e-05	2.12333e-05
		0.3659	4261	158	4103	316	4419	0.0715094	0.0713802		1	1137.99	0.0122942	1137.98	0.0245883	1138	2.16066e-05	2.12333e-05
		0.3643	4262	158	4104	316	4420	0.0714932	0.0713802		1	1138.99	0.0123093	1138.98	0.0246187	1139	2.16143e-05	2.12333e-05
		0.364	4264	158	4106	316	4422	0.0714609	0.0713802		1	1139.99	0.0123245	1139.98	0.0246491	1140	2.1622e-05	2.12333e-05
		0.3636	4265	158	4107	316	4423	0.0714447	0.0713802		1	1140.99	0.0123398	1140.98	0.0246796	1141	2.16298e-05	2.12333e-05
		0.3631	4266	158	4108	316	4424	0.0714286	0.0713802		1	1141.99	0.0123551	1141.98	0.0247101	1142	2.16376e-05	2.12333e-05
		0.363	4267	158	4109	316	4425	0.0714124	0.0713802		1	1142.99	0.0123704	1142.98	0.0247407	1143	2.16454e-05	2.12333e-05
		0.3625	4268	158	4110	316	4426	0.0713963	0.0713802		1	1143.99	0.0123857	1143.98	0.0247714	1144	2.16534e-05	2.12333e-05
		0.3624	4269	158	4111	316	4427	0.0713802	0.0713802		1	1144.99	0.0124011	1144.98	0.0248022	1145	2.16613e-05	2.12333e-05
		0.362	4269	159	4110	318	4428	0.0718157	0.0717185		1	1145.99	0.0124165	1145.98	0.024833	1146	2.16693e-05	2.12333e-05
		0.3615	4270	159	4111	318	4429	0.0717995	0.0717185		1	1146.99	0.012432	1146.98	0.024864	1147	2.16774e-05	2.12333e-05
		0.3593	4271	159	4112	318	4430	0.0717833	0.0717185		1	1147.99	0.0124475	1147.98	0.0248949	1148	2.16855e-05	2.12333e-05
		0.3591	4273	159	4114	318	4432	0.0717509	0.0717185		1	1148.99	0.012463	1148.98	0.024926	1149	2.16936e-05	2.12333e-05
		0.3589	4274	159	4115	318	4433	0.0717347	0.0717185		1	1149.99	0.0124786	1149.98	0.0249571	1150	2.17018e-05	2.12333e-05
		0.3588	4275	159	4116	318	4434	0.0717185	0.0717185		1	1150.99	0.0124942	1150.98	0.0249883	1151	2.17101e-05	2.12333e-05
		0.3586	4275	160	4115	320	4435	0.0721533	0.0720721		1	1151.99	0.0125098	1151.97	0.0250196	1152	2.17184e-05	2.12333e-05
		0.3575	4276	160	4116	320	4436	0.0721371	0.0720721		1	1152.99	0.0125255	1152.97	0.0250509	1153	2.17267e-05	2.12333e-05
		0.3572	4277	160	4117	320	4437	0.0721208	0.0720721		1	1153.99	0.0125412	1153.97	0.0250823	1154	2.17351e-05	2.12333e-05
		0.3567	4279	160	4119	320	4439	0.0720883	0.0720721		1	1154.99	0.0125569	1154.97	0.0251138	1155	2.17436e-05	2.12333e-05
		0.3565	4280	160	4120	320	4440	0.0720721	0.0720721		1	1155.99	0.0125727	1155.97	0.0251454	1156	2.17521e-05	2.12333e-05
		0.3564	4280	161	4119	322	4441	0.0725062	0.0725062		1	1156.99	0.0125885	1156.97	0.025177	1157	2.17606e-05	2.12333e-05
		0.3563	4280	162	4118	324	4442	0.0729401	0.0729401		1	1157.99	0.0126044	1157.97	0.0252087	1158	2.17692e-05	2.12333e-05
		0.3559	4280	163	4117	326	4443	0.0733738	0.0733738		1	1158.99	0.0126203	1158.97	0.0252405	1159	2.17779e-05	2.12333e-05
		0.3558	4280	164	4116	328	4444	0.0738074	0.0737079		1	1159.99	0.0126362	1159.97	0.0252724	1160	2.17866e-05	2.12333e-05
		0.3544	4281	164	4117	328	4445	0.0737908	0.0737079		1	1160.99	0.0126522	1160.97	0.0253043	1161	2.17953e-05	2.12333e-05
		0.3533	4282	164	4118	328	4446	0.0737742	0.0737079		1	1161.99	0.0126682	1161.97	0.0253364	1162	2.18041e-05	2.12333e-05
		0.353	4283	164	4119	328	4447	0.0737576	0.0737079		1	1162.99	0.0126842	1162.97	0.0253685	1163	2.1813e-05	2.12333e-05
		0.3516	4284	164	4120	328	4448	0.073741	0.0737079		1	1163.99	0.0127003	1163.97	0.0254006	1164	2.18219e-05	2.12333e-05
		0.3508	4285	164	4121	328	4449	0.0737244	0.0737079		1	1164.99	0.0127164	1164.97	0.0254329	1165	2.18308e-05	2.12333e-05
		0.3501	4286	164	4122	328	4450	0.0737079	0.0737079		1	1165.99	0.0127326	1165.97	0.0254652	1166	2.18398e-05	2.12333e-05
		0.349	4286	165	4121	330	4451	0.0741406	0.0740741		1	1166.99	0.0127488	1166.97	0.0254976	1167	2.18489e-05	2.12333e-05
		0.3482	4287	165	4122	330	4452	0.074124	0.0740741		1	1167.99	0.0127651	1167.97	0.0255301	1168	2.1858e-05	2.12333e-05
		0.348	4289	165	4124	330	4454	0.0740907	0.0740741		1	1168.99	0.0127813	1168.97	0.0255627	1169	2.18671e-05	2.12333e-05
		0.3473	4290	165	4125	330	4455	0.0740741	0.0740741		1	1169.99	0.0127977	1169.97	0.0255953	1170	2.18764e-05	2.12333e-05
		0.3467	4291	166	4125	332	4457	0.0744896	0.0744061		1	1170.99	0.012814	1170.97	0.0256281	1171	2.18856e-05	2.12333e-05
		0.3459	4292	166	4126	332	4458	0.0744729	0.0744061		1	1171.99	0.0128304	1171.97	0.0256609	1172	2.18949e-05	2.12333e-05
		0.3455	4293	166	4127	332	4459	0.0744562	0.0744061		1	1172.99	0.0128469	1172.97	0.0256938	1173	2.19043e-05	2.12333e-05
		0.3447	4294	166	4128	332	4460	0.0744395	0.0744061		1	1173.99	0.0128634	1173.97	0.0257267	1174	2.19137e-05	2.12333e-05
		0.3446	4295	166	4129	332	4461	0.0744228	0.0744061		1	1174.99	0.0128799	1174.97	0.0257598	1175	2.19232e-05	2.12333e-05
		0.3443	4296	166	4130	332	4462	0.0744061	0.0744061		1	1175.99	0.0128965	1175.97	0.0257929	1176	2.19328e-05	2.12333e-05
		0.3439	4296	168	4128	336	4464	0.0752688	0.0752688		1	1176.99	0.0129131	1176.97	0.0258261	1177	2.19423e-05	2.12333e-05
		0.3434	4296	169	4127	338	4465	0.0756999	0.0756829		1	1177.99	0.0129297	1177.97	0.0258594	1178	2.1952e-05	2.12333e-05
		0.3426	4297	169	4128	338	4466	0.0756829	0.0756829		1	1178.99	0.0129464	1178.97	0.0258928	1179	2.19617e-05	2.12333e-05
		0.3419	4297	171	4126	342	4468	0.0765443	0.0765443		1	1179.99	0.0129631	1179.97	0.0259263	1180	2.19714e-05	2.12333e-05
		0.3418	4297	172	4125	344	4469	0.0769747	0.0768543		1	1180.99	0.0129799	1180.97	0.0259599	1181	2.19812e-05	2.12333e-05
		0.3417	4298	172	4126	344	4470	0.0769575	0.0768543		1	1181.99	0.0129967	1181.97	0.0259935	1182	2.19911e-05	2.12333e-05
		0.3408	4299	172	4127	344	4471	0.0769403	0.0768543		1	1182.99	0.0130136	1182.97	0.0260272	1183	2.2001e-05	2.12333e-05
		0.3405	4300	172	4128	344	4472	0.0769231	0.0768543		1	1183.99	0.0130305	1183.97	0.026061	1184	2.2011e-05	2.12333e-05
		0.3401	4301	172	4129	344	4473	0.0769059	0.0768543		1	1184.99	0.0130475	1184.97	0.0260949	1185	2.2021e-05	2.12333e-05
		0.3398	4302	172	4130	344	4474	0.0768887	0.0768543		1	1185.99	0.0130644	1185.97	0.0261289	1186	2.20311e-05	2.12333e-05
		0.3397	4303	172	4131	344	4475	0.0768715	0.0768543		1	1186.99	0.0130815	1186.97	0.026163	1187	2.20412e-05	2.12333e-05
		0.3392	4304	172	4132	344	4476	0.0768543	0.0768543		1	1187.99	0.0130986	1187.97	0.0261971	1188	2.20514e-05	2.12333e-05
		0.3382	4304	173	4131	346	4477	0.0772839	0.0772149		1	1188.99	0.0131157	1188.97	0.0262314	1189	2.20617e-05	2.12333e-05
		0.3378	4305	173	4132	346	4478	0.0772666	0.0772149		1	1189.99	0.0131328	1189.97	0.0262657	1190	2.2072e-05	2.12333e-05
		0.3377	4306	173	4133	346	4479	0.0772494	0.0772149		1	1190.99	0.0131501	1190.97	0.0263001	1191	2.20824e-05	2.12333e-05
		0.3367	4307	173	4134	346	4480	0.0772321	0.0772149		1	1191.99	0.0131673	1191.97	0.0263346	1192	2.20928e-05	2.12333e-05
		0.3365	4308	173	4135	346	4481	0.0772149	0.0772149		1	1192.99	0.0131846	1192.97	0.0263692	1193	2.21033e-05	2.12333e-05
		0.3351	4309	174	4135	348	4483	0.0776266	0.0776266		1	1193.99	0.0132019	1193.97	0.0264039	1194	2.21138e-05	2.12333e-05
		0.3338	4309	175	4134	350	4484	0.0780553	0.0780553		1	1194.99	0.0132193	1194.97	0.0264387	1195	2.21244e-05	2.12333e-05
		0.3334	4309	176	4133	352	4485	0.0784838	0.0784489		1	1195.99	0.0132368	1195.97	0.0264735	1196	2.21351e-05	2.12333e-05
		0.332	4310	176	4134	352	4486	0.0784663	0.0784489		1	1196.99	0.0132542	1196.97	0.0265085	1197	2.21458e-05	2.12333e-05
		0.3318	4311	176	4135	352	4487	0.0784489	0.0784489		1	1197.99	0.0132718	1197.97	0.0265435	1198	2.21565e-05	2.12333e-05
		0.3313	4311	177	4134	354	4488	0.078877	0.0788594		1	1198.99	0.0132893	1198.97	0.0265787	1199	2.21674e-05	2.12333e-05
		0.3305	4312	177	4135	354	4489	0.0788594	0.0788594		1	1199.99	0.013307	1199.97	0.0266139	1200	2.21783e-05	2.12333e-05
		0.3302	4313	178	4135	356	4491	0.0792697	0.0792344		1	1200.99	0.0133246	1200.97	0.0266492	1201	2.21892e-05	2.12333e-05
		0.3291	4314	178	4136	356	4492	0.079252	0.0792344		1	1201.99	0.0133423	1201.97	0.0266847	1202	2.22002e-05	2.12333e-05
		0.3284	4315	178	4137	356	4493	0.0792344	0.0792344		1	1202.99	0.0133601	1202.97	0.0267202	1203	2.22113e-05	2.12333e-05
		0.3283	4315	179	4136	358	4494	0.0796618	0.0795909		1	1203.99	0.0133779	1203.97	0.0267558	1204	2.22224e-05	2.12333e-05
		0.3276	4316	179	4137	358	4495	0.079644	0.0795909		1	1204.99	0.0133957	1204.97	0.0267915	1205	2.22336e-05	2.12333e-05
		0.3271	4317	179	4138	358	4496	0.0796263	0.0795909		1	1205.99	0.0134136	1205.97	0.0268273	1206	2.22448e-05	2.12333e-05
		0.327	4318	179	4139	358	4497	0.0796086	0.0795909		1	1206.99	0.0134316	1206.97	0.0268632	1207	2.22561e-05	2.12333e-05
		0.3269	4319	179	4140	358	4498	0.0795909	0.0795909		1	1207.99	0.0134496	1207.97	0.0268992	1208	2.22675e-05	2.12333e-05
		0.3267	4320	180	4140	360	4500	0.08	0.0799467		1	1208.99	0.0134676	1208.97	0.0269352	1209	2.22789e-05	2.12333e-05
		0.326	4322	180	4142	360	4502	0.0799645	0.0799467		1	1209.99	0.0134857	1209.97	0.0269714	1210	2.22904e-05	2.12333e-05
		0.3258	4323	180	4143	360	4503	0.0799467	0.0799467		1	1210.99	0.0135038	1210.97	0.0270077	1211	2.2302e-05	2.12333e-05
		0.3247	4323	181	4142	362	4504	0.080373	0.0803017		1	1211.99	0.013522	1211.97	0.0270441	1212	2.23136e-05	2.12333e-05
		0.3245	4324	181	4143	362	4505	0.0803552	0.0803017		1	1212.99	0.0135403	1212.97	0.0270805	1213	2.23253e-05	2.12333e-05
		0.324	4325	181	4144	362	4506	0.0803373	0.0803017		1	1213.99	0.0135586	1213.97	0.0271171	1214	2.2337e-05	2.12333e-05
		0.3239	4327	181	4146	362	4508	0.0803017	0.0803017		1	1214.99	0.0135769	1214.97	0.0271538	1215	2.23488e-05	2.12333e-05
		0.3233	4327	182	4145	364	4509	0.0807274	0.0807274		1	1215.99	0.0135953	1215.97	0.0271905	1216	2.23606e-05	2.12333e-05
		0.3231	4327	183	4144	366	4510	0.081153	0.081135		1	1216.99	0.0136137	1216.97	0.0272274	1217	2.23726e-05	2.12333e-05
		0.323	4328	183	4145	366	4511	0.081135	0.081135		1	1217.99	0.0136322	1217.97	0.0272644	1218	2.23845e-05	2.12333e-05
		0.3225	4328	184	4144	368	4512	0.0815603	0.0815061		1	1218.99	0.0136507	1218.97	0.0273014	1219	2.23966e-05	2.12333e-05
		0.3224	4329	184	4145	368	4513	0.0815422	0.0815061		1	1219.99	0.0136693	1219.97	0.0273386	1220	2.24087e-05	2.12333e-05
		0.3212	4330	184	4146	368	4514	0.0815241	0.0815061		1	1220.99	0.0136879	1220.97	0.0273759	1221	2.24209e-05	2.12333e-05
		0.321	4331	184	4147	368	4515	0.0815061	0.0815061		1	1221.99	0.0137066	1221.97	0.0274133	1222	2.24331e-05	2.12333e-05
		0.3206	4331	185	4146	370	4516	0.0819309	0.0818584		1	1222.99	0.0137254	1222.97	0.0274507	1223	2.24454e-05	2.12333e-05
		0.3204	4332	185	4147	370	4517	0.0819128	0.0818584		1	1223.99	0.0137442	1223.97	0.0274883	1224	2.24578e-05	2.12333e-05
		0.3203	4333	185	4148	370	4518	0.0818946	0.0818584		1	1224.99	0.013763	1224.97	0.027526	1225	2.24702e-05	2.12333e-05
		0.3202	4334	185	4149	370	4519	0.0818765	0.0818584		1	1225.99	0.0137819	1225.97	0.0275638	1226	2.24827e-05	2.12333e-05
		0.3199	4335	185	4150	370	4520	0.0818584	0.0818584		1	1226.99	0.0138008	1226.97	0.0276017	1227	2.24952e-05	2.12333e-05
		0.319	4336	186	4150	372	4522	0.0822645	0.0821918		1	1227.99	0.0138198	1227.97	0.0276397	1228	2.25079e-05	2.12333e-05
		0.3188	4337	186	4151	372	4523	0.0822463	0.0821918		1	1228.99	0.0138389	1228.97	0.0276778	1229	2.25206e-05	2.12333e-05
		0.3186	4338	186	4152	372	4524	0.0822281	0.0821918		1	1229.99	0.013858	1229.97	0.027716	1230	2.25333e-05	2.12333e-05
		0.3185	4340	186	4154	372	4526	0.0821918	0.0821918		1	1230.99	0.0138771	1230.97	0.0277543	1231	2.25461e-05	2.12333e-05
		0.3178	4340	187	4153	374	4527	0.0826154	0.0825243		1	1231.99	0.0138963	1231.97	0.0277927	1232	2.2559e-05	2.12333e-05
		0.3174	4341	187	4154	374	4528	0.0825972	0.0825243		1	1232.99	0.0139156	1232.97	0.0278312	1233	2.2572e-05	2.12333e-05
		0.3169	4342	187	4155	374	4529	0.0825789	0.0825243		1	1233.99	0.0139349	1233.97	0.0278698	1234	2.2585e-05	2.12333e-05
		0.3157	4343	187	4156	374	4530	0.0825607	0.0825243		1	1234.99	0.0139543	1234.97	0.0279086	1235	2.2598e-05	2.12333e-05
		0.3153	4344	187	4157	374	4531	0.0825425	0.0825243		1	1235.99	0.0139737	1235.97	0.0279474	1236	2.26112e-05	2.12333e-05
		0.3152	4345	187	4158	374	4532	0.0825243	0.0825243		1	1236.99	0.0139932	1236.97	0.0279864	1237	2.26244e-05	2.12333e-05
		0.3139	4345	188	4157	376	4533	0.0829473	0.0829107		1	1237.99	0.0140127	1237.97	0.0280255	1238	2.26377e-05	2.12333e-05
		0.3138	4346	188	4158	376	4534	0.082929	0.0829107		1	1238.99	0.0140323	1238.97	0.0280646	1239	2.2651e-05	2.12333e-05
		0.3133	4347	188	4159	376	4535	0.0829107	0.0829107		1	1239.99	0.014052	1239.97	0.0281039	1240	2.26645e-05	2.12333e-05
		0.3132	4347	189	4158	378	4536	0.0833333	0.0832783		1	1240.99	0.0140717	1240.97	0.0281433	1241	2.26779e-05	2.12333e-05
		0.313	4348	189	4159	378	4537	0.083315	0.0832783		1	1241.99	0.0140914	1241.97	0.0281828	1242	2.26915e-05	2.12333e-05
		0.3116	4349	189	4160	378	4538	0.0832966	0.0832783		1	1242.99	0.0141112	1242.97	0.0282224	1243	2.27051e-05	2.12333e-05
		0.3113	4350	189	4161	378	4539	0.0832783	0.0832783		1	1243.99	0.0141311	1243.97	0.0282622	1244	2.27188e-05	2.12333e-05
		0.3112	4350	190	4160	380	4540	0.0837004	0.0837004		1	1244.99	0.014151	1244.97	0.028302	1245	2.27325e-05	2.12333e-05
		0.3099	4350	191	4159	382	4541	0.0841224	0.0840854		1	1245.99	0.014171	1245.97	0.028342	1246	2.27464e-05	2.12333e-05
		0.3096	4351	191	4160	382	4542	0.0841039	0.0840854		1	1246.99	0.014191	1246.97	0.0283821	1247	2.27603e-05	2.12333e-05
		0.3095	4352	191	4161	382	4543	0.0840854	0.0840854		1	1247.99	0.0142111	1247.97	0.0284222	1248	2.27742e-05	2.12333e-05
		0.3091	4353	192	4161	384	4545	0.0844884	0.0844327		1	1248.99	0.0142313	1248.97	0.0284625	1249	2.27883e-05	2.12333e-05
		0.3083	4354	192	4162	384	4546	0.0844699	0.0844327		1	1249.99	0.0142515	1249.97	0.028503	1250	2.28024e-05	2.12333e-05
		0.3078	4355	192	4163	384	4547	0.0844513	0.0844327		1	1250.99	0.0142717	1250.97	0.0285435	1251	2.28165e-05	2.12333e-05
		0.3073	4356	192	4164	384	4548	0.0844327	0.0844327		1	1251.99	0.0142921	1251.97	0.0285841	1252	2.28308e-05	2.12333e-05
		0.3065	4356	193	4163	386	4549	0.0848538	0.0848165		1	1252.99	0.0143124	1252.97	0.0286249	1253	2.28451e-05	2.12333e-05
		0.3062	4357	193	4164	386	4550	0.0848352	0.0848165		1	1253.99	0.0143329	1253.97	0.0286658	1254	2.28595e-05	2.12333e-05
		0.306	4358	193	4165	386	4551	0.0848165	0.0848165		1	1254.99	0.0143534	1254.97	0.0287068	1255	2.28739e-05	2.12333e-05
		0.3052	4358	194	4164	388	4552	0.0852373	0.0852373		1	1255.99	0.0143739	1255.97	0.0287479	1256	2.28885e-05	2.12333e-05
		0.305	4358	195	4163	390	4553	0.0856578	0.0856578		1	1256.99	0.0143946	1256.97	0.0287891	1257	2.2903e-05	2.12333e-05
		0.3044	4358	196	4162	392	4554	0.0860782	0.0860782		1	1257.99	0.0144152	1257.97	0.0288305	1258	2.29177e-05	2.12333e-05
		0.3043	4358	197	4161	394	4555	0.0864984	0.0864984		1	1258.99	0.014436	1258.97	0.028872	1259	2.29325e-05	2.12333e-05
		0.3034	4358	198	4160	396	4556	0.0869183	0.0868993		1	1259.99	0.0144568	1259.97	0.0289136	1260	2.29473e-05	2.12333e-05
		0.3029	4359	198	4161	396	4557	0.0868993	0.0868993		1	1260.99	0.0144776	1260.97	0.0289553	1261	2.29621e-05	2.12333e-05
		0.3026	4359	199	4160	398	4558	0.087319	0.0872998		1	1261.99	0.0144986	1261.97	0.0289971	1262	2.29771e-05	2.12333e-05
		0.3011	4360	199	4161	398	4559	0.0872998	0.0872998		1	1262.99	0.0145195	1262.97	0.0290391	1263	2.29921e-05	2.12333e-05
		0.3009	4360	200	4160	400	4560	0.0877193	0.087604		1	1263.99	0.0145406	1263.97	0.0290811	1264	2.30072e-05	2.12333e-05
		0.2993	4361	200	4161	400	4561	0.0877001	0.087604		1	1264.99	0.0145617	1264.97	0.0291233	1265	2.30224e-05	2.12333e-05
		0.2989	4365	200	4165	400	4565	0.0876232	0.087604		1	1265.99	0.0145828	1265.97	0.0291657	1266	2.30377e-05	2.12333e-05
		0.2988	4366	200	4166	400	4566	0.087604	0.087604		1	1266.99	0.0146041	1266.97	0.0292081	1267	2.3053e-05	2.12333e-05
		0.2979	4366	201	4165	402	4567	0.0880228	0.0880228		1	1267.99	0.0146253	1267.97	0.0292507	1268	2.30684e-05	2.12333e-05
		0.2977	4366	202	4164	404	4568	0.0884413	0.0883253		1	1268.99	0.0146467	1268.97	0.0292934	1269	2.30838e-05	2.12333e-05
		0.2974	4367	202	4165	404	4569	0.088422	0.0883253		1	1269.99	0.0146681	1269.97	0.0293362	1270	2.30994e-05	2.12333e-05
		0.2967	4368	202	4166	404	4570	0.0884026	0.0883253		1	1270.99	0.0146896	1270.97	0.0293792	1271	2.3115e-05	2.12333e-05
		0.2964	4369	202	4167	404	4571	0.0883833	0.0883253		1	1271.99	0.0147111	1271.97	0.0294222	1272	2.31307e-05	2.12333e-05
		0.2962	4370	202	4168	404	4572	0.088364	0.0883253		1	1272.99	0.0147327	1272.97	0.0294654	1273	2.31464e-05	2.12333e-05
		0.2955	4371	202	4169	404	4573	0.0883446	0.0883253		1	1273.99	0.0147544	1273.97	0.0295088	1274	2.31623e-05	2.12333e-05
		0.2951	4372	202	4170	404	4574	0.0883253	0.0883253		1	1274.99	0.0147761	1274.97	0.0295522	1275	2.31782e-05	2.12333e-05
		0.2947	4372	203	4169	406	4575	0.0887432	0.0887044		1	1275.99	0.0147979	1275.97	0.0295958	1276	2.31942e-05	2.12333e-05
		0.2945	4373	203	4170	406	4576	0.0887238	0.0887044		1	1276.99	0.0148198	1276.97	0.0296395	1277	2.32103e-05	2.12333e-05
		0.2943	4374	203	4171	406	4577	0.0887044	0.0887044		1	1277.99	0.0148417	1277.97	0.0296833	1278	2.32264e-05	2.12333e-05
		0.2939	4374	204	4170	408	4578	0.0891219	0.0891024		1	1278.99	0.0148637	1278.97	0.0297273	1279	2.32426e-05	2.12333e-05
		0.2936	4375	204	4171	408	4579	0.0891024	0.0891024		1	1279.99	0.0148857	1279.97	0.0297714	1280	2.32589e-05	2.12333e-05
		0.2926	4375	205	4170	410	4580	0.0895197	0.0894806		1	1280.99	0.0149078	1280.97	0.0298157	1281	2.32753e-05	2.12333e-05
		0.2917	4376	205	4171	410	4581	0.0895001	0.0894806		1	1281.99	0.01493	1281.97	0.02986	1282	2.32917e-05	2.12333e-05
		0.2916	4377	205	4172	410	4582	0.0894806	0.0894806		1	1282.99	0.0149523	1282.97	0.0299045	1283	2.33083e-05	2.12333e-05
		0.2915	4377	206	4171	412	4583	0.0898974	0.0898778		1	1283.99	0.0149746	1283.97	0.0299491	1284	2.33249e-05	2.12333e-05
		0.2913	4378	206	4172	412	4584	0.0898778	0.0898778		1	1284.99	0.0149969	1284.97	0.0299939	1285	2.33416e-05	2.12333e-05
		0.2906	4378	207	4171	414	4585	0.0902944	0.0902551		1	1285.98	0.0150194	1285.97	0.0300388	1286	2.33583e-05	2.12333e-05
		0.2905	4379	207	4172	414	4586	0.0902747	0.0902551		1	1286.98	0.0150419	1286.97	0.0300838	1287	2.33751e-05	2.12333e-05
		0.2898	4380	207	4173	414	4587	0.0902551	0.0902551		1	1287.98	0.0150645	1287.97	0.030129	1288	2.33921e-05	2.12333e-05
		0.2893	4380	208	4172	416	4588	0.0906713	0.0904938		1	1288.98	0.0150871	1288.97	0.0301743	1289	2.34091e-05	2.12333e-05
		0.2892	4381	208	4173	416	4589	0.0906516	0.0904938		1	1289.98	0.0151099	1289.97	0.0302197	1290	2.34261e-05	2.12333e-05
		0.2891	4383	208	4175	416	4591	0.0906121	0.0904938		1	1290.98	0.0151326	1290.97	0.0302653	1291	2.34433e-05	2.12333e-05
		0.2885	4384	208	4176	416	4592	0.0905923	0.0904938		1	1291.98	0.0151555	1291.97	0.030311	1292	2.34605e-05	2.12333e-05
		0.2883	4385	208	4177	416	4593	0.0905726	0.0904938		1	1292.98	0.0151784	1292.97	0.0303568	1293	2.34778e-05	2.12333e-05
		0.2879	4386	208	4178	416	4594	0.0905529	0.0904938		1	1293.98	0.0152014	1293.97	0.0304028	1294	2.34952e-05	2.12333e-05
		0.2871	4387	208	4179	416	4595	0.0905332	0.0904938		1	1294.98	0.0152245	1294.97	0.0304489	1295	2.35127e-05	2.12333e-05
		0.2868	4388	208	4180	416	4596	0.0905135	0.0904938		1	1295.98	0.0152476	1295.97	0.0304952	1296	2.35302e-05	2.12333e-05
		0.2867	4389	208	4181	416	4597	0.0904938	0.0904938		1	1296.98	0.0152708	1296.97	0.0305416	1297	2.35479e-05	2.12333e-05
		0.2865	4389	209	4180	418	4598	0.0909091	0.0909091		1	1297.98	0.0152941	1297.97	0.0305881	1298	2.35656e-05	2.12333e-05
		0.2859	4389	210	4179	420	4599	0.0913242	0.0913242		1	1298.98	0.0153174	1298.97	0.0306348	1299	2.35834e-05	2.12333e-05
		0.2855	4389	211	4178	422	4600	0.0917391	0.0917192		1	1299.98	0.0153408	1299.97	0.0306816	1300	2.36012e-05	2.12333e-05
		0.2852	4390	211	4179	422	4601	0.0917192	0.0917192		1	1300.98	0.0153643	1300.97	0.0307286	1301	2.36192e-05	2.12333e-05
		0.285	4390	212	4178	424	4602	0.0921339	0.0921339		1	1301.98	0.0153878	1301.97	0.0307757	1302	2.36372e-05	2.12333e-05
		0.2844	4390	213	4177	426	4603	0.0925483	0.0925282		1	1302.98	0.0154115	1302.97	0.0308229	1303	2.36553e-05	2.12333e-05
		0.2832	4391	213	4178	426	4604	0.0925282	0.0925282		1	1303.98	0.0154351	1303.97	0.0308703	1304	2.36735e-05	2.12333e-05
		0.2827	4391	214	4177	428	4605	0.0929425	0.0929425		1	1304.98	0.0154589	1304.97	0.0309178	1305	2.36918e-05	2.12333e-05
		0.2823	4391	215	4176	430	4606	0.0933565	0.0933565		1	1305.98	0.0154827	1305.97	0.0309655	1306	2.37102e-05	2.12333e-05
		0.2822	4391	216	4175	432	4607	0.0937703	0.0937703		1	1306.98	0.0155067	1306.97	0.0310133	1307	2.37286e-05	2.12333e-05
		0.2814	4392	217	4175	434	4609	0.0941636	0.0941636		1	1307.98	0.0155306	1307.97	0.0310613	1308	2.37472e-05	2.12333e-05
		0.2808	4392	218	4174	436	4610	0.094577	0.094536		1	1308.98	0.0155547	1308.97	0.0311094	1309	2.37658e-05	2.12333e-05
		0.2806	4393	218	4175	436	4611	0.0945565	0.094536		1	1309.98	0.0155788	1309.97	0.0311577	1310	2.37845e-05	2.12333e-05
		0.2802	4394	218	4176	436	4612	0.094536	0.094536		1	1310.98	0.015603	1310.97	0.0312061	1311	2.38032e-05	2.12333e-05
		0.2801	4394	219	4175	438	4613	0.0949491	0.0948668		1	1311.98	0.0156273	1311.97	0.0312546	1312	2.38221e-05	2.12333e-05
		0.28	4395	219	4176	438	4614	0.0949285	0.0948668		1	1312.98	0.0156517	1312.97	0.0313033	1313	2.38411e-05	2.12333e-05
		0.2795	4396	219	4177	438	4615	0.0949079	0.0948668		1	1313.98	0.0156761	1313.97	0.0313522	1314	2.38601e-05	2.12333e-05
		0.2785	4397	219	4178	438	4616	0.0948873	0.0948668		1	1314.98	0.0157006	1314.97	0.0314011	1315	2.38792e-05	2.12333e-05
		0.2782	4398	219	4179	438	4617	0.0948668	0.0948668		1	1315.98	0.0157251	1315.97	0.0314503	1316	2.38984e-05	2.12333e-05
		0.2777	4398	220	4178	440	4618	0.0952793	0.0952793		1	1316.98	0.0157498	1316.97	0.0314996	1317	2.39177e-05	2.12333e-05
		0.277	4399	221	4178	442	4620	0.095671	0.095671		1	1317.98	0.0157745	1317.97	0.031549	1318	2.39371e-05	2.12333e-05
		0.2764	4400	222	4178	444	4622	0.0960623	0.0960415		1	1318.98	0.0157993	1318.97	0.0315986	1319	2.39565e-05	2.12333e-05
		0.2762	4401	222	4179	444	4623	0.0960415	0.0960415		1	1319.98	0.0158242	1319.97	0.0316484	1320	2.39761e-05	2.12333e-05
		0.276	4401	223	4178	446	4624	0.0964533	0.0964533		1	1320.98	0.0158491	1320.97	0.0316983	1321	2.39957e-05	2.12333e-05
		0.2753	4401	224	4177	448	4625	0.0968649	0.0968649		1	1321.98	0.0158742	1321.97	0.0317484	1322	2.40154e-05	2.12333e-05
		0.275	4401	225	4176	450	4626	0.0972763	0.0972763		1	1322.98	0.0158993	1322.97	0.0317986	1323	2.40352e-05	2.12333e-05
		0.2747	4401	226	4175	452	4627	0.0976875	0.0976664		1	1323.98	0.0159245	1323.97	0.0318489	1324	2.40551e-05	2.12333e-05
		0.2743	4402	226	4176	452	4628	0.0976664	0.0976664		1	1324.98	0.0159497	1324.97	0.0318995	1325	2.40751e-05	2.12333e-05
		0.2737	4402	227	4175	454	4629	0.0980773	0.0980773		1	1325.98	0.0159751	1325.97	0.0319501	1326	2.40951e-05	2.12333e-05
		0.2734	4402	229	4173	458	4631	0.0988987	0.0988774		1	1326.98	0.0160005	1326.97	0.032001	1327	2.41153e-05	2.12333e-05
		0.2731	4403	229	4174	458	4632	0.0988774	0.0988774		1	1327.98	0.016026	1327.97	0.032052	1328	2.41355e-05	2.12333e-05
		0.2729	4403	230	4173	460	4633	0.0992877	0.0992663		1	1328.98	0.0160515	1328.97	0.0321031	1329	2.41558e-05	2.12333e-05
		0.2727	4404	230	4174	460	4634	0.0992663	0.0992663		1	1329.98	0.0160772	1329.97	0.0321544	1330	2.41762e-05	2.12333e-05
		0.2726	4404	231	4173	462	4635	0.0996764	0.0996764		1	1330.98	0.0161029	1330.97	0.0322059	1331	2.41967e-05	2.12333e-05
		0.2721	4404	232	4172	464	4636	0.100086	0.0999569		1	1331.98	0.0161287	1331.97	0.0322575	1332	2.42173e-05	2.12333e-05
		0.2713	4405	232	4173	464	4637	0.100065	0.0999569		1	1332.98	0.0161546	1332.97	0.0323093	1333	2.4238e-05	2.12333e-05
		0.2701	4406	232	4174	464	4638	0.100043	0.0999569		1	1333.98	0.0161806	1333.97	0.0323612	1334	2.42588e-05	2.12333e-05
		0.2699	4408	232	4176	464	4640	0.1	0.0999569		1	1334.98	0.0162067	1334.97	0.0324133	1335	2.42796e-05	2.12333e-05
		0.2697	4409	232	4177	464	4641	0.0999785	0.0999569		1	1335.98	0.0162328	1335.97	0.0324656	1336	2.43006e-05	2.12333e-05
		0.2695	4410	232	4178	464	4642	0.0999569	0.0999569		1	1336.98	0.016259	1336.97	0.032518	1337	2.43216e-05	2.12333e-05
		0.2683	4410	234	4176	468	4644	0.100775	0.10071		1	1337.98	0.0162853	1337.97	0.0325706	1338	2.43427e-05	2.12333e-05
		0.2681	4412	234	4178	468	4646	0.100732	0.10071		1	1338.98	0.0163117	1338.97	0.0326233	1339	2.4364e-05	2.12333e-05
		0.2674	4413	234	4179	468	4647	0.10071	0.10071		1	1339.98	0.0163381	1339.97	0.0326762	1340	2.43853e-05	2.12333e-05
		0.267	4413	235	4178	470	4648	0.101119	0.101119		1	1340.98	0.0163647	1340.97	0.0327293	1341	2.44067e-05	2.12333e-05
		0.2664	4414	236	4178	472	4650	0.101505	0.101462		1	1341.98	0.0163913	1341.97	0.0327826	1342	2.44281e-05	2.12333e-05
		0.2661	4415	236	4179	472	4651	0.101484	0.101462		1	1342.98	0.016418	1342.97	0.032836	1343	2.44497e-05	2.12333e-05
		0.2649	4416	236	4180	472	4652	0.101462	0.101462		1	1343.98	0.0164448	1343.97	0.0328896	1344	2.44714e-05	2.12333e-05
		0.2648	4416	237	4179	474	4653	0.10187	0.101804		1	1344.98	0.0164716	1344.97	0.0329433	1345	2.44932e-05	2.12333e-05
		0.2645	4417	237	4180	474	4654	0.101848	0.101804		1	1345.98	0.0164986	1345.97	0.0329972	1346	2.4515e-05	2.12333e-05
		0.2644	4418	237	4181	474	4655	0.101826	0.101804		1	1346.98	0.0165256	1346.97	0.0330513	1347	2.4537e-05	2.12333e-05
		0.2641	4419	237	4182	474	4656	0.101804	0.101804		1	1347.98	0.0165528	1347.97	0.0331055	1348	2.4559e-05	2.12333e-05
		0.2635	4419	238	4181	476	4657	0.102212	0.102212		1	1348.98	0.01658	1348.97	0.0331599	1349	2.45811e-05	2.12333e-05
		0.2634	4419	239	4180	478	4658	0.102619	0.102597		1	1349.98	0.0166073	1349.97	0.0332145	1350	2.46034e-05	2.12333e-05
		0.2633	4420	239	4181	478	4659	0.102597	0.102597		1	1350.98	0.0166346	1350.97	0.0332693	1351	2.46257e-05	2.12333e-05
		0.2627	4420	240	4180	480	4660	0.103004	0.102982		1	1351.98	0.0166621	1351.97	0.0333242	1352	2.46481e-05	2.12333e-05
		0.2618	4421	240	4181	480	4661	0.102982	0.102982		1	1352.98	0.0166897	1352.97	0.0333793	1353	2.46706e-05	2.12333e-05
		0.2609	4421	241	4180	482	4662	0.103389	0.103323		1	1353.98	0.0167173	1353.97	0.0334346	1354	2.46932e-05	2.12333e-05
		0.2602	4422	241	4181	482	4663	0.103367	0.103323		1	1354.98	0.016745	1354.97	0.03349	1355	2.47159e-05	2.12333e-05
		0.2598	4423	241	4182	482	4664	0.103345	0.103323		1	1355.98	0.0167728	1355.97	0.0335456	1356	2.47387e-05	2.12333e-05
		0.2591	4424	241	4183	482	4665	0.103323	0.103323		1	1356.98	0.0168007	1356.97	0.0336014	1357	2.47615e-05	2.12333e-05
		0.2585	4424	242	4182	484	4666	0.103729	0.103729		1	1357.98	0.0168287	1357.97	0.0336574	1358	2.47845e-05	2.12333e-05
		0.2583	4424	243	4181	486	4667	0.104135	0.104113		1	1358.98	0.0168568	1358.97	0.0337135	1359	2.48076e-05	2.12333e-05
		0.2582	4425	243	4182	486	4668	0.104113	0.104113		1	1359.98	0.0168849	1359.97	0.0337698	1360	2.48308e-05	2.12333e-05
		0.2571	4425	244	4181	488	4669	0.104519	0.104474		1	1360.98	0.0169132	1360.97	0.0338263	1361	2.4854e-05	2.12333e-05
		0.257	4426	244	4182	488	4670	0.104497	0.104474		1	1361.98	0.0169415	1361.97	0.033883	1362	2.48774e-05	2.12333e-05
		0.2562	4427	244	4183	488	4671	0.104474	0.104474		1	1362.98	0.0169699	1362.97	0.0339398	1363	2.49008e-05	2.12333e-05
		0.256	4427	245	4182	490	4672	0.10488	0.104813		1	1363.98	0.0169984	1363.97	0.0339969	1364	2.49244e-05	2.12333e-05
		0.2558	4428	245	4183	490	4673	0.104858	0.104813		1	1364.98	0.017027	1364.97	0.0340541	1365	2.4948e-05	2.12333e-05
		0.2554	4430	245	4185	490	4675	0.104813	0.104813		1	1365.98	0.0170557	1365.97	0.0341114	1366	2.49718e-05	2.12333e-05
		0.2553	4430	246	4184	492	4676	0.105218	0.105218		1	1366.98	0.0170845	1366.97	0.034169	1367	2.49956e-05	2.12333e-05
		0.255	4430	247	4183	494	4677	0.105623	0.105578		1	1367.98	0.0171134	1367.97	0.0342267	1368	2.50195e-05	2.12333e-05
		0.2546	4431	247	4184	494	4678	0.105601	0.105578		1	1368.98	0.0171423	1368.97	0.0342847	1369	2.50436e-05	2.12333e-05
		0.2541	4432	247	4185	494	4679	0.105578	0.105578		1	1369.98	0.0171714	1369.97	0.0343428	1370	2.50677e-05	2.12333e-05
		0.2536	4432	248	4184	496	4680	0.105983	0.105983		1	1370.98	0.0172005	1370.97	0.0344011	1371	2.50919e-05	2.12333e-05
		0.2535	4432	249	4183	498	4681	0.106388	0.106388		1	1371.98	0.0172298	1371.97	0.0344595	1372	2.51163e-05	2.12333e-05
		0.2534	4432	250	4182	500	4682	0.106792	0.106792		1	1372.98	0.0172591	1372.97	0.0345182	1373	2.51407e-05	2.12333e-05
		0.253	4432	251	4181	502	4683	0.107196	0.107196		1	1373.98	0.0172885	1373.97	0.034577	1374	2.51652e-05	2.12333e-05
		0.2529	4432	252	4180	504	4684	0.1076	0.1076		1	1374.98	0.017318	1374.97	0.0346361	1375	2.51899e-05	2.12333e-05
		0.2524	4432	253	4179	506	4685	0.108004	0.108004		1	1375.98	0.0173476	1375.97	0.0346953	1376	2.52146e-05	2.12333e-05
		0.2523	4432	254	4178	508	4686	0.108408	0.108385		1	1376.98	0.0173773	1376.97	0.0347547	1377	2.52394e-05	2.12333e-05
		0.252	4433	254	4179	508	4687	0.108385	0.108385		1	1377.98	0.0174071	1377.97	0.0348142	1378	2.52643e-05	2.12333e-05
		0.2518	4433	255	4178	510	4688	0.108788	0.108788		1	1378.98	0.017437	1378.97	0.034874	1379	2.52894e-05	2.12333e-05
		0.2512	4433	256	4177	512	4689	0.109192	0.109168		1	1379.98	0.017467	1379.97	0.034934	1380	2.53145e-05	2.12333e-05
		0.2511	4434	256	4178	512	4690	0.109168	0.109168		1	1380.98	0.0174971	1380.97	0.0349941	1381	2.53397e-05	2.12333e-05
		0.251	4434	257	4177	514	4691	0.109572	0.109548		1	1381.98	0.0175272	1381.96	0.0350545	1382	2.5365e-05	2.12333e-05
		0.2501	4435	257	4178	514	4692	0.109548	0.109548		1	1382.98	0.0175575	1382.96	0.035115	1383	2.53905e-05	2.12333e-05
		0.25	4435	258	4177	516	4693	0.109951	0.109951		1	1383.98	0.0175879	1383.96	0.0351757	1384	2.5416e-05	2.12333e-05
		0.2497	4435	259	4176	518	4694	0.110354	0.11026		1	1384.98	0.0176183	1384.96	0.0352366	1385	2.54416e-05	2.12333e-05
		0.2496	4436	259	4177	518	4695	0.11033	0.11026		1	1385.98	0.0176489	1385.96	0.0352977	1386	2.54673e-05	2.12333e-05
		0.2483	4437	259	4178	518	4696	0.110307	0.11026		1	1386.98	0.0176795	1386.96	0.035359	1387	2.54932e-05	2.12333e-05
		0.2481	4438	259	4179	518	4697	0.110283	0.11026		1	1387.98	0.0177103	1387.96	0.0354205	1388	2.55191e-05	2.12333e-05
		0.2479	4439	259	4180	518	4698	0.11026	0.11026		1	1388.98	0.0177411	1388.96	0.0354822	1389	2.55451e-05	2.12333e-05
		0.2468	4439	260	4179	520	4699	0.110662	0.110638		1	1389.98	0.017772	1389.96	0.0355441	1390	2.55713e-05	2.12333e-05
		0.2466	4440	260	4180	520	4700	0.110638	0.110638		1	1390.98	0.0178031	1390.96	0.0356062	1391	2.55975e-05	2.12333e-05
		0.2465	4440	261	4179	522	4701	0.11104	0.110946		1	1391.98	0.0178342	1391.96	0.0356684	1392	2.56239e-05	2.12333e-05
		0.2461	4442	261	4181	522	4703	0.110993	0.110946		1	1392.98	0.0178654	1392.96	0.0357309	1393	2.56503e-05	2.12333e-05
		0.2459	4443	261	4182	522	4704	0.110969	0.110946		1	1393.98	0.0178968	1393.96	0.0357936	1394	2.56769e-05	2.12333e-05
		0.2447	4444	261	4183	522	4705	0.110946	0.110946		1	1394.98	0.0179282	1394.96	0.0358564	1395	2.57035e-05	2.12333e-05
		0.2441	4444	262	4182	524	4706	0.111347	0.111347		1	1395.98	0.0179597	1395.96	0.0359195	1396	2.57303e-05	2.12333e-05
		0.2438	4444	263	4181	526	4707	0.111748	0.111725		1	1396.98	0.0179914	1396.96	0.0359828	1397	2.57572e-05	2.12333e-05
		0.2435	4445	263	4182	526	4708	0.111725	0.111725		1	1397.98	0.0180231	1397.96	0.0360462	1398	2.57841e-05	2.12333e-05
		0.2432	4445	264	4181	528	4709	0.112126	0.112078		1	1398.98	0.0180549	1398.96	0.0361099	1399	2.58112e-05	2.12333e-05
		0.2429	4446	264	4182	528	4710	0.112102	0.112078		1	1399.98	0.0180869	1399.96	0.0361737	1400	2.58384e-05	2.12333e-05
		0.2426	4447	264	4183	528	4711	0.112078	0.112078		1	1400.98	0.0181189	1400.96	0.0362378	1401	2.58657e-05	2.12333e-05
		0.2421	4447	265	4182	530	4712	0.112479	0.112479		1	1401.98	0.018151	1401.96	0.0363021	1402	2.58931e-05	2.12333e-05
		0.2416	4447	266	4181	532	4713	0.112879	0.112879		1	1402.98	0.0181833	1402.96	0.0363665	1403	2.59206e-05	2.12333e-05
		0.2411	4447	267	4180	534	4714	0.11328	0.113136		1	1403.98	0.0182156	1403.96	0.0364312	1404	2.59482e-05	2.12333e-05
		0.2401	4449	267	4182	534	4716	0.113232	0.113136		1	1404.98	0.0182481	1404.96	0.0364961	1405	2.59759e-05	2.12333e-05
		0.24	4450	267	4183	534	4717	0.113208	0.113136		1	1405.98	0.0182806	1405.96	0.0365612	1406	2.60037e-05	2.12333e-05
		0.2397	4451	267	4184	534	4718	0.113184	0.113136		1	1406.98	0.0183132	1406.96	0.0366265	1407	2.60316e-05	2.12333e-05
		0.2396	4452	267	4185	534	4719	0.11316	0.113136		1	1407.98	0.018346	1407.96	0.036692	1408	2.60596e-05	2.12333e-05
		0.2382	4453	267	4186	534	4720	0.113136	0.113136		1	1408.98	0.0183788	1408.96	0.0367577	1409	2.60878e-05	2.12333e-05
		0.2378	4453	268	4185	536	4721	0.113535	0.113367		1	1409.98	0.0184118	1409.96	0.0368236	1410	2.6116e-05	2.12333e-05
		0.2369	4454	268	4186	536	4722	0.113511	0.113367		1	1410.98	0.0184449	1410.96	0.0368897	1411	2.61444e-05	2.12333e-05
		0.2367	4455	268	4187	536	4723	0.113487	0.113367		1	1411.98	0.018478	1411.96	0.0369561	1412	2.61729e-05	2.12333e-05
		0.2362	4456	268	4188	536	4724	0.113463	0.113367		1	1412.98	0.0185113	1412.96	0.0370226	1413	2.62014e-05	2.12333e-05
		0.2359	4457	268	4189	536	4725	0.113439	0.113367		1	1413.98	0.0185447	1413.96	0.0370894	1414	2.62301e-05	2.12333e-05
		0.235	4458	268	4190	536	4726	0.113415	0.113367		1	1414.98	0.0185782	1414.96	0.0371563	1415	2.62589e-05	2.12333e-05
		0.2344	4459	268	4191	536	4727	0.113391	0.113367		1	1415.98	0.0186118	1415.96	0.0372235	1416	2.62878e-05	2.12333e-05
		0.2343	4460	268	4192	536	4728	0.113367	0.113367		1	1416.98	0.0186455	1416.96	0.0372909	1417	2.63168e-05	2.12333e-05
		0.2342	4460	269	4191	538	4729	0.113766	0.113766		1	1417.98	0.0186793	1417.96	0.0373585	1418	2.63459e-05	2.12333e-05
		0.2339	4460	270	4190	540	4730	0.114165	0.114044		1	1418.98	0.0187132	1418.96	0.0374263	1419	2.63751e-05	2.12333e-05
		0.2331	4461	270	4191	540	4731	0.114141	0.114044		1	1419.98	0.0187472	1419.96	0.0374944	1420	2.64045e-05	2.12333e-05
		0.2328	4462	270	4192	540	4732	0.114117	0.114044		1	1420.98	0.0187813	1420.96	0.0375626	1421	2.64339e-05	2.12333e-05
		0.2326	4463	270	4193	540	4733	0.114093	0.114044		1	1421.98	0.0188155	1421.96	0.0376311	1422	2.64635e-05	2.12333e-05
		0.2322	4464	270	4194	540	4734	0.114068	0.114044		1	1422.98	0.0188499	1422.96	0.0376998	1423	2.64932e-05	2.12333e-05
		0.2321	4465	270	4195	540	4735	0.114044	0.114044		1	1423.98	0.0188843	1423.96	0.0377687	1424	2.65229e-05	2.12333e-05
		0.2319	4465	271	4194	542	4736	0.114443	0.114346		1	1424.98	0.0189189	1424.96	0.0378378	1425	2.65528e-05	2.12333e-05
		0.2311	4466	271	4195	542	4737	0.114418	0.114346		1	1425.98	0.0189536	1425.96	0.0379071	1426	2.65828e-05	2.12333e-05
		0.2309	4467	271	4196	542	4738	0.114394	0.114346		1	1426.98	0.0189883	1426.96	0.0379767	1427	2.66129e-05	2.12333e-05
		0.2308	4468	271	4197	542	4739	0.11437	0.114346		1	1427.98	0.0190232	1427.96	0.0380465	1428	2.66432e-05	2.12333e-05
		0.2305	4469	271	4198	542	4740	0.114346	0.114346		1	1428.98	0.0190582	1428.96	0.0381165	1429	2.66735e-05	2.12333e-05
		0.2303	4469	272	4197	544	4741	0.114744	0.114695		1	1429.98	0.0190933	1429.96	0.0381867	1430	2.6704e-05	2.12333e-05
		0.2298	4470	272	4198	544	4742	0.11472	0.114695		1	1430.98	0.0191286	1430.96	0.0382571	1431	2.67345e-05	2.12333e-05
		0.2295	4471	272	4199	544	4743	0.114695	0.114695		1	1431.98	0.0191639	1431.96	0.0383278	1432	2.67652e-05	2.12333e-05
		0.2293	4471	273	4198	546	4744	0.115093	0.114996		1	1432.98	0.0191993	1432.96	0.0383987	1433	2.6796e-05	2.12333e-05
		0.2289	4472	273	4199	546	4745	0.115068	0.114996		1	1433.98	0.0192349	1433.96	0.0384698	1434	2.68269e-05	2.12333e-05
		0.2284	4473	273	4200	546	4746	0.115044	0.114996		1	1434.98	0.0192706	1434.96	0.0385411	1435	2.68579e-05	2.12333e-05
		0.2282	4474	273	4201	546	4747	0.11502	0.114996		1	1435.98	0.0193064	1435.96	0.0386127	1436	2.68891e-05	2.12333e-05
		0.228	4475	273	4202	546	4748	0.114996	0.114996		1	1436.98	0.0193423	1436.96	0.0386845	1437	2.69203e-05	2.12333e-05
		0.2279	4476	274	4202	548	4750	0.115368	0.11515		1	1437.98	0.0193783	1437.96	0.0387565	1438	2.69517e-05	2.12333e-05
		0.2278	4477	274	4203	548	4751	0.115344	0.11515		1	1438.98	0.0194144	1438.96	0.0388288	1439	2.69832e-05	2.12333e-05
		0.2272	4479	274	4205	548	4753	0.115296	0.11515		1	1439.98	0.0194506	1439.96	0.0389013	1440	2.70148e-05	2.12333e-05
		0.2266	4480	274	4206	548	4754	0.115271	0.11515		1	1440.98	0.019487	1440.96	0.038974	1441	2.70465e-05	2.12333e-05
		0.2264	4481	274	4207	548	4755	0.115247	0.11515		1	1441.98	0.0195235	1441.96	0.0390469	1442	2.70783e-05	2.12333e-05
		0.2258	4482	274	4208	548	4756	0.115223	0.11515		1	1442.98	0.01956	1442.96	0.0391201	1443	2.71103e-05	2.12333e-05
		0.2257	4483	274	4209	548	4757	0.115199	0.11515		1	1443.98	0.0195968	1443.96	0.0391935	1444	2.71423e-05	2.12333e-05
		0.2255	4485	274	4211	548	4759	0.11515	0.11515		1	1444.98	0.0196336	1444.96	0.0392671	1445	2.71745e-05	2.12333e-05
		0.225	4485	275	4210	550	4760	0.115546	0.115449		1	1445.98	0.0196705	1445.96	0.039341	1446	2.72068e-05	2.12333e-05
		0.2247	4486	275	4211	550	4761	0.115522	0.115449		1	1446.98	0.0197076	1446.96	0.0394151	1447	2.72392e-05	2.12333e-05
		0.2244	4487	275	4212	550	4762	0.115498	0.115449		1	1447.98	0.0197447	1447.96	0.0394895	1448	2.72717e-05	2.12333e-05
		0.2241	4488	275	4213	550	4763	0.115473	0.115449		1	1448.98	0.019782	1448.96	0.039564	1449	2.73044e-05	2.12333e-05
		0.2238	4489	275	4214	550	4764	0.115449	0.115449		1	1449.98	0.0198194	1449.96	0.0396388	1450	2.73371e-05	2.12333e-05
		0.2235	4489	276	4213	552	4765	0.115845	0.115845		1	1450.98	0.0198569	1450.96	0.0397139	1451	2.737e-05	2.12333e-05
		0.2222	4490	277	4213	554	4767	0.116216	0.116191		1	1451.98	0.0198946	1451.96	0.0397892	1452	2.7403e-05	2.12333e-05
		0.2221	4491	277	4214	554	4768	0.116191	0.116191		1	1452.98	0.0199324	1452.96	0.0398647	1453	2.74361e-05	2.12333e-05
		0.2214	4491	278	4213	556	4769	0.116586	0.11644		1	1453.98	0.0199702	1453.96	0.0399405	1454	2.74694e-05	2.12333e-05
		0.221	4493	278	4215	556	4771	0.116537	0.11644		1	1454.98	0.0200082	1454.96	0.0400165	1455	2.75027e-05	2.12333e-05
		0.2205	4494	278	4216	556	4772	0.116513	0.11644		1	1455.98	0.0200464	1455.96	0.0400927	1456	2.75362e-05	2.12333e-05
		0.2203	4495	278	4217	556	4773	0.116489	0.11644		1	1456.98	0.0200846	1456.96	0.0401692	1457	2.75698e-05	2.12333e-05
		0.2197	4496	278	4218	556	4774	0.116464	0.11644		1	1457.98	0.020123	1457.96	0.0402459	1458	2.76035e-05	2.12333e-05
		0.2196	4497	278	4219	556	4775	0.11644	0.11644		1	1458.98	0.0201615	1458.96	0.0403229	1459	2.76374e-05	2.12333e-05
		0.2195	4497	279	4218	558	4776	0.116834	0.116834		1	1459.98	0.0202001	1459.96	0.0404001	1460	2.76713e-05	2.12333e-05
		0.2193	4497	280	4217	560	4777	0.117228	0.117204		1	1460.98	0.0202388	1460.96	0.0404776	1461	2.77054e-05	2.12333e-05
		0.2188	4498	280	4218	560	4778	0.117204	0.117204		1	1461.98	0.0202776	1461.96	0.0405553	1462	2.77396e-05	2.12333e-05
		0.2185	4498	281	4217	562	4779	0.117598	0.117549		1	1462.98	0.0203166	1462.96	0.0406332	1463	2.77739e-05	2.12333e-05
		0.2181	4499	281	4218	562	4780	0.117573	0.117549		1	1463.98	0.0203557	1463.96	0.0407114	1464	2.78084e-05	2.12333e-05
		0.2179	4500	281	4219	562	4781	0.117549	0.117549		1	1464.98	0.0203949	1464.96	0.0407899	1465	2.78429e-05	2.12333e-05
		0.2177	4500	282	4218	564	4782	0.117942	0.117918		1	1465.98	0.0204343	1465.96	0.0408686	1466	2.78776e-05	2.12333e-05
		0.2173	4501	282	4219	564	4783	0.117918	0.117918		1	1466.98	0.0204738	1466.96	0.0409475	1467	2.79124e-05	2.12333e-05
		0.2169	4501	283	4218	566	4784	0.118311	0.118262		1	1467.98	0.0205134	1467.96	0.0410267	1468	2.79474e-05	2.12333e-05
		0.2166	4502	283	4219	566	4785	0.118286	0.118262		1	1468.98	0.0205531	1468.96	0.0411062	1469	2.79824e-05	2.12333e-05
		0.2163	4503	283	4220	566	4786	0.118262	0.118262		1	1469.98	0.0205929	1469.96	0.0411859	1470	2.80176e-05	2.12333e-05
		0.216	4503	284	4219	568	4787	0.118655	0.118556		1	1470.98	0.0206329	1470.96	0.0412658	1471	2.80529e-05	2.12333e-05
		0.2152	4504	284	4220	568	4788	0.11863	0.118556		1	1471.98	0.020673	1471.96	0.041346	1472	2.80883e-05	2.12333e-05
		0.2148	4505	284	4221	568	4789	0.118605	0.118556		1	1472.98	0.0207132	1472.96	0.0414265	1473	2.81239e-05	2.12333e-05
		0.2146	4506	284	4222	568	4790	0.11858	0.118556		1	1473.98	0.0207536	1473.96	0.0415072	1474	2.81595e-05	2.12333e-05
		0.2143	4507	284	4223	568	4791	0.118556	0.118556		1	1474.98	0.0207941	1474.96	0.0415881	1475	2.81953e-05	2.12333e-05
		0.2138	4507	285	4222	570	4792	0.118948	0.118948		1	1475.98	0.0208347	1475.96	0.0416693	1476	2.82313e-05	2.12333e-05
		0.2137	4507	286	4221	572	4793	0.119341	0.119341		1	1476.98	0.0208754	1476.96	0.0417508	1477	2.82673e-05	2.12333e-05
		0.2136	4507	287	4220	574	4794	0.119733	0.119733		1	1477.98	0.0209163	1477.96	0.0418326	1478	2.83035e-05	2.12333e-05
		0.2132	4507	288	4219	576	4795	0.120125	0.1201		1	1478.98	0.0209573	1478.96	0.0419145	1479	2.83398e-05	2.12333e-05
		0.2129	4508	288	4220	576	4796	0.1201	0.1201		1	1479.98	0.0209984	1479.96	0.0419968	1480	2.83762e-05	2.12333e-05
		0.2118	4508	289	4219	578	4797	0.120492	0.120467		1	1480.98	0.0210397	1480.96	0.0420793	1481	2.84128e-05	2.12333e-05
		0.2116	4509	289	4220	578	4798	0.120467	0.120467		1	1481.98	0.021081	1481.96	0.0421621	1482	2.84494e-05	2.12333e-05
		0.2115	4509	290	4219	580	4799	0.120859	0.120859		1	1482.98	0.0211226	1482.96	0.0422451	1483	2.84862e-05	2.12333e-05
		0.2111	4509	291	4218	582	4800	0.12125	0.12125		1	1483.98	0.0211642	1483.96	0.0423284	1484	2.85232e-05	2.12333e-05
		0.211	4510	292	4218	584	4802	0.121616	0.121616		1	1484.98	0.021206	1484.96	0.0424119	1485	2.85602e-05	2.12333e-05
		0.2104	4510	293	4217	586	4803	0.122007	0.121982		1	1485.98	0.0212479	1485.96	0.0424958	1486	2.85974e-05	2.12333e-05
		0.2093	4511	293	4218	586	4804	0.121982	0.121982		1	1486.98	0.0212899	1486.96	0.0425799	1487	2.86347e-05	2.12333e-05
		0.2091	4511	294	4217	588	4805	0.122373	0.122322		1	1487.98	0.0213321	1487.96	0.0426642	1488	2.86722e-05	2.12333e-05
		0.2088	4512	294	4218	588	4806	0.122347	0.122322		1	1488.98	0.0213744	1488.96	0.0427488	1489	2.87097e-05	2.12333e-05
		0.208	4513	294	4219	588	4807	0.122322	0.122322		1	1489.98	0.0214168	1489.96	0.0428337	1490	2.87474e-05	2.12333e-05
		0.2074	4513	295	4218	590	4808	0.122712	0.122712		1	1490.98	0.0214594	1490.96	0.0429188	1491	2.87853e-05	2.12333e-05
		0.2071	4514	296	4218	592	4810	0.123077	0.123051		1	1491.98	0.0215021	1491.96	0.0430043	1492	2.88232e-05	2.12333e-05
		0.2069	4515	296	4219	592	4811	0.123051	0.123051		1	1492.98	0.021545	1492.96	0.0430899	1493	2.88613e-05	2.12333e-05
		0.2062	4515	297	4218	594	4812	0.123441	0.123416		1	1493.98	0.021588	1493.96	0.0431759	1494	2.88995e-05	2.12333e-05
		0.2056	4516	297	4219	594	4813	0.123416	0.123416		1	1494.98	0.0216311	1494.96	0.0432621	1495	2.89379e-05	2.12333e-05
		0.2055	4516	298	4218	596	4814	0.123806	0.123806		1	1495.98	0.0216743	1495.96	0.0433486	1496	2.89764e-05	2.12333e-05
		0.2054	4516	299	4217	598	4815	0.124195	0.124195		1	1496.98	0.0217177	1496.96	0.0434354	1497	2.9015e-05	2.12333e-05
		0.205	4516	300	4216	600	4816	0.124585	0.124533		1	1497.98	0.0217612	1497.96	0.0435224	1498	2.90537e-05	2.12333e-05
		0.2049	4517	300	4217	600	4817	0.124559	0.124533		1	1498.98	0.0218049	1498.96	0.0436098	1499	2.90926e-05	2.12333e-05
		0.2039	4518	300	4218	600	4818	0.124533	0.124533		1	1499.98	0.0218487	1499.96	0.0436973	1500	2.91316e-05	2.12333e-05
		0.2038	4518	301	4217	602	4819	0.124922	0.124922		1	1500.98	0.0218926	1500.96	0.0437852	1501	2.91707e-05	2.12333e-05
		0.2032	4518	302	4216	604	4820	0.125311	0.125233		1	1501.98	0.0219367	1501.96	0.0438734	1502	2.921e-05	2.12333e-05
		0.203	4520	302	4218	604	4822	0.125259	0.125233		1	1502.98	0.0219809	1502.96	0.0439618	1503	2.92494e-05	2.12333e-05
		0.2029	4521	302	4219	604	4823	0.125233	0.125233		1	1503.98	0.0220252	1503.96	0.0440505	1504	2.92889e-05	2.12333e-05
		0.2026	4521	303	4218	606	4824	0.125622	0.12544		1	1504.98	0.0220697	1504.96	0.0441394	1505	2.93285e-05	2.12333e-05
		0.2025	4522	303	4219	606	4825	0.125596	0.12544		1	1505.98	0.0221144	1505.96	0.0442287	1506	2.93683e-05	2.12333e-05
		0.2023	4523	303	4220	606	4826	0.12557	0.12544		1	1506.98	0.0221591	1506.96	0.0443182	1507	2.94083e-05	2.12333e-05
		0.2016	4524	303	4221	606	4827	0.125544	0.12544		1	1507.98	0.022204	1507.96	0.0444081	1508	2.94483e-05	2.12333e-05
		0.2007	4525	303	4222	606	4828	0.125518	0.12544		1	1508.98	0.0222491	1508.96	0.0444982	1509	2.94885e-05	2.12333e-05
		0.2006	4526	303	4223	606	4829	0.125492	0.12544		1	1509.98	0.0222943	1509.96	0.0445885	1510	2.95288e-05	2.12333e-05
		0.2001	4527	303	4224	606	4830	0.125466	0.12544		1	1510.98	0.0223396	1510.96	0.0446792	1511	2.95693e-05	2.12333e-05
		0.1996	4528	303	4225	606	4831	0.12544	0.12544		1	1511.98	0.0223851	1511.96	0.0447702	1512	2.96099e-05	2.12333e-05
		0.1992	4529	304	4225	608	4833	0.125802	0.125802		1	1512.98	0.0224307	1512.96	0.0448614	1513	2.96506e-05	2.12333e-05
		0.1991	4529	305	4224	610	4834	0.126189	0.126163		1	1513.98	0.0224765	1513.96	0.0449529	1514	2.96915e-05	2.12333e-05
		0.199	4530	305	4225	610	4835	0.126163	0.126163		1	1514.98	0.0225224	1514.95	0.0450447	1515	2.97325e-05	2.12333e-05
		0.1986	4530	306	4224	612	4836	0.126551	0.126499		1	1515.98	0.0225684	1515.95	0.0451368	1516	2.97736e-05	2.12333e-05
		0.1983	4532	306	4226	612	4838	0.126499	0.126499		1	1516.98	0.0226146	1516.95	0.0452292	1517	2.98149e-05	2.12333e-05
		0.1978	4533	307	4226	614	4840	0.12686	0.12686		1	1517.98	0.0226609	1517.95	0.0453219	1518	2.98563e-05	2.12333e-05
		0.1974	4534	308	4226	616	4842	0.12722	0.127194		1	1518.98	0.0227074	1518.95	0.0454148	1519	2.98979e-05	2.12333e-05
		0.1972	4535	308	4227	616	4843	0.127194	0.127194		1	1519.98	0.022754	1519.95	0.0455081	1520	2.99395e-05	2.12333e-05
		0.1971	4535	310	4225	620	4845	0.127967	0.127941		1	1520.98	0.0228008	1520.95	0.0456016	1521	2.99814e-05	2.12333e-05
		0.1969	4536	310	4226	620	4846	0.127941	0.127941		1	1521.98	0.0228477	1521.95	0.0456955	1522	3.00233e-05	2.12333e-05
		0.1957	4536	311	4225	622	4847	0.128327	0.128274		1	1522.98	0.0228948	1522.95	0.0457896	1523	3.00654e-05	2.12333e-05
		0.1954	4537	311	4226	622	4848	0.1283	0.128274		1	1523.98	0.022942	1523.95	0.045884	1524	3.01076e-05	2.12333e-05
		0.1953	4538	311	4227	622	4849	0.128274	0.128274		1	1524.98	0.0229894	1524.95	0.0459788	1525	3.015e-05	2.12333e-05
		0.1951	4538	312	4226	624	4850	0.12866	0.12866		1	1525.98	0.0230369	1525.95	0.0460738	1526	3.01925e-05	2.12333e-05
		0.1945	4538	314	4224	628	4852	0.129431	0.129431		1	1526.98	0.0230845	1526.95	0.0461691	1527	3.02352e-05	2.12333e-05
		0.1938	4538	315	4223	630	4853	0.129817	0.12979		1	1527.98	0.0231324	1527.95	0.0462647	1528	3.02779e-05	2.12333e-05
		0.1933	4539	315	4224	630	4854	0.12979	0.12979		1	1528.98	0.0231803	1528.95	0.0463606	1529	3.03209e-05	2.12333e-05
		0.1929	4539	316	4223	632	4855	0.130175	0.130148		1	1529.98	0.0232284	1529.95	0.0464568	1530	3.03639e-05	2.12333e-05
		0.1927	4540	316	4224	632	4856	0.130148	0.130148		1	1530.98	0.0232767	1530.95	0.0465533	1531	3.04071e-05	2.12333e-05
		0.1926	4540	317	4223	634	4857	0.130533	0.130506		1	1531.98	0.0233251	1531.95	0.0466501	1532	3.04505e-05	2.12333e-05
		0.1925	4541	317	4224	634	4858	0.130506	0.130506		1	1532.98	0.0233736	1532.95	0.0467473	1533	3.0494e-05	2.12333e-05
		0.1921	4541	318	4223	636	4859	0.130891	0.13081		1	1533.98	0.0234223	1533.95	0.0468447	1534	3.05376e-05	2.12333e-05
		0.1916	4543	318	4225	636	4861	0.130837	0.13081		1	1534.98	0.0234712	1534.95	0.0469424	1535	3.05814e-05	2.12333e-05
		0.191	4544	318	4226	636	4862	0.13081	0.13081		1	1535.98	0.0235202	1535.95	0.0470404	1536	3.06253e-05	2.12333e-05
		0.1904	4544	319	4225	638	4863	0.131195	0.131195		1	1536.98	0.0235694	1536.95	0.0471388	1537	3.06693e-05	2.12333e-05
		0.19	4546	320	4226	640	4866	0.131525	0.131471		1	1537.98	0.0236187	1537.95	0.0472374	1538	3.07135e-05	2.12333e-05
		0.1895	4547	320	4227	640	4867	0.131498	0.131471		1	1538.98	0.0236682	1538.95	0.0473363	1539	3.07578e-05	2.12333e-05
		0.1893	4548	320	4228	640	4868	0.131471	0.131471		1	1539.98	0.0237178	1539.95	0.0474356	1540	3.08023e-05	2.12333e-05
		0.1892	4548	321	4227	642	4869	0.131855	0.131855		1	1540.98	0.0237676	1540.95	0.0475351	1541	3.08469e-05	2.12333e-05
		0.1886	4549	322	4227	644	4871	0.132211	0.132184		1	1541.98	0.0238175	1541.95	0.047635	1542	3.08917e-05	2.12333e-05
		0.1884	4550	322	4228	644	4872	0.132184	0.132184		1	1542.98	0.0238676	1542.95	0.0477352	1543	3.09366e-05	2.12333e-05
		0.1883	4550	323	4227	646	4873	0.132567	0.132567		1	1543.98	0.0239178	1543.95	0.0478357	1544	3.09817e-05	2.12333e-05
		0.1882	4550	324	4226	648	4874	0.13295	0.13295		1	1544.98	0.0239682	1544.95	0.0479365	1545	3.10269e-05	2.12333e-05
		0.1881	4550	325	4225	650	4875	0.133333	0.133333		1	1545.98	0.0240188	1545.95	0.0480376	1546	3.10722e-05	2.12333e-05
		0.1869	4550	326	4224	652	4876	0.133716	0.133716		1	1546.98	0.0240695	1546.95	0.048139	1547	3.11177e-05	2.12333e-05
		0.1867	4550	327	4223	654	4877	0.134099	0.134099		1	1547.98	0.0241204	1547.95	0.0482408	1548	3.11633e-05	2.12333e-05
		0.1863	4550	328	4222	656	4878	0.134481	0.134454		1	1548.98	0.0241714	1548.95	0.0483428	1549	3.12091e-05	2.12333e-05
		0.1861	4551	328	4223	656	4879	0.134454	0.134454		1	1549.98	0.0242226	1549.95	0.0484452	1550	3.1255e-05	2.12333e-05
		0.1858	4551	329	4222	658	4880	0.134836	0.134781		1	1550.98	0.024274	1550.95	0.0485479	1551	3.1301e-05	2.12333e-05
		0.1852	4552	329	4223	658	4881	0.134808	0.134781		1	1551.98	0.0243255	1551.95	0.0486509	1552	3.13472e-05	2.12333e-05
		0.185	4553	329	4224	658	4882	0.134781	0.134781		1	1552.98	0.0243771	1552.95	0.0487543	1553	3.13936e-05	2.12333e-05
		0.1849	4553	330	4223	660	4883	0.135163	0.135135		1	1553.98	0.024429	1553.95	0.0488579	1554	3.14401e-05	2.12333e-05
		0.1847	4554	330	4224	660	4884	0.135135	0.135135		1	1554.98	0.0244809	1554.95	0.0489619	1555	3.14867e-05	2.12333e-05
		0.184	4554	331	4223	662	4885	0.135517	0.135434		1	1555.98	0.0245331	1555.95	0.0490662	1556	3.15335e-05	2.12333e-05
		0.1836	4555	331	4224	662	4886	0.135489	0.135434		1	1556.98	0.0245854	1556.95	0.0491708	1557	3.15805e-05	2.12333e-05
		0.1835	4556	331	4225	662	4887	0.135461	0.135434		1	1557.98	0.0246379	1557.95	0.0492757	1558	3.16276e-05	2.12333e-05
		0.1833	4557	331	4226	662	4888	0.135434	0.135434		1	1558.98	0.0246905	1558.95	0.049381	1559	3.16748e-05	2.12333e-05
		0.1831	4557	332	4225	664	4889	0.135815	0.135815		1	1559.98	0.0247433	1559.95	0.0494866	1560	3.17222e-05	2.12333e-05
		0.1822	4557	334	4223	668	4891	0.136577	0.136271		1	1560.98	0.0247963	1560.95	0.0495925	1561	3.17697e-05	2.12333e-05
		0.1821	4558	334	4224	668	4892	0.136549	0.136271		1	1561.98	0.0248494	1561.95	0.0496988	1562	3.18174e-05	2.12333e-05
		0.1817	4559	334	4225	668	4893	0.136522	0.136271		1	1562.98	0.0249027	1562.95	0.0498053	1563	3.18652e-05	2.12333e-05
		0.1816	4560	334	4226	668	4894	0.136494	0.136271		1	1563.98	0.0249561	1563.95	0.0499123	1564	3.19132e-05	2.12333e-05
		0.1813	4561	334	4227	668	4895	0.136466	0.136271		1	1564.97	0.0250097	1564.95	0.0500195	1565	3.19613e-05	2.12333e-05
		0.1811	4562	334	4228	668	4896	0.136438	0.136271		1	1565.97	0.0250635	1565.95	0.0501271	1566	3.20096e-05	2.12333e-05
		0.181	4563	334	4229	668	4897	0.13641	0.136271		1	1566.97	0.0251175	1566.95	0.050235	1567	3.2058e-05	2.12333e-05
		0.1809	4565	334	4231	668	4899	0.136354	0.136271		1	1567.97	0.0251716	1567.95	0.0503432	1568	3.21066e-05	2.12333e-05
		0.1807	4566	334	4232	668	4900	0.136327	0.136271		1	1568.97	0.0252259	1568.95	0.0504517	1569	3.21553e-05	2.12333e-05
		0.1806	4567	334	4233	668	4901	0.136299	0.136271		1	1569.97	0.0252803	1569.95	0.0505606	1570	3.22042e-05	2.12333e-05
		0.1805	4568	334	4234	668	4902	0.136271	0.136271		1	1570.97	0.0253349	1570.95	0.0506699	1571	3.22533e-05	2.12333e-05
		0.1801	4570	336	4234	672	4906	0.136975	0.136919		1	1571.97	0.0253897	1571.95	0.0507794	1572	3.23024e-05	2.12333e-05
		0.1795	4571	336	4235	672	4907	0.136947	0.136919		1	1572.97	0.0254447	1572.95	0.0508894	1573	3.23518e-05	2.12333e-05
		0.1791	4572	336	4236	672	4908	0.136919	0.136919		1	1573.97	0.0254998	1573.95	0.0509996	1574	3.24013e-05	2.12333e-05
		0.1786	4573	337	4236	674	4910	0.137271	0.137048		1	1574.97	0.0255551	1574.95	0.0511102	1575	3.24509e-05	2.12333e-05
		0.1783	4574	337	4237	674	4911	0.137243	0.137048		1	1575.97	0.0256106	1575.95	0.0512211	1576	3.25007e-05	2.12333e-05
		0.1781	4575	337	4238	674	4912	0.137215	0.137048		1	1576.97	0.0256662	1576.95	0.0513324	1577	3.25506e-05	2.12333e-05
		0.1779	4576	337	4239	674	4913	0.137187	0.137048		1	1577.97	0.025722	1577.95	0.051444	1578	3.26007e-05	2.12333e-05
		0.1775	4577	337	4240	674	4914	0.137159	0.137048		1	1578.97	0.025778	1578.95	0.0515559	1579	3.2651e-05	2.12333e-05
		0.1772	4578	337	4241	674	4915	0.137131	0.137048		1	1579.97	0.0258341	1579.95	0.0516682	1580	3.27014e-05	2.12333e-05
		0.1771	4579	337	4242	674	4916	0.137103	0.137048		1	1580.97	0.0258904	1580.95	0.0517809	1581	3.2752e-05	2.12333e-05
		0.1768	4580	337	4243	674	4917	0.137075	0.137048		1	1581.97	0.0259469	1581.95	0.0518939	1582	3.28027e-05	2.12333e-05
		0.1766	4581	337	4244	674	4918	0.137048	0.137048		1	1582.97	0.0260036	1582.95	0.0520072	1583	3.28536e-05	2.12333e-05
		0.1763	4581	338	4243	676	4919	0.137426	0.13737		1	1583.97	0.0260604	1583.95	0.0521209	1584	3.29046e-05	2.12333e-05
		0.176	4582	338	4244	676	4920	0.137398	0.13737		1	1584.97	0.0261174	1584.95	0.0522349	1585	3.29558e-05	2.12333e-05
		0.1759	4583	338	4245	676	4921	0.13737	0.13737		1	1585.97	0.0261746	1585.95	0.0523493	1586	3.30071e-05	2.12333e-05
		0.1758	4583	339	4244	678	4922	0.137749	0.137749		1	1586.97	0.026232	1586.95	0.052464	1587	3.30586e-05	2.12333e-05
		0.1755	4583	340	4243	680	4923	0.138127	0.138127		1	1587.97	0.0262895	1587.95	0.0525791	1588	3.31102e-05	2.12333e-05
		0.1752	4583	342	4241	684	4925	0.138883	0.138658		1	1588.97	0.0263473	1588.95	0.0526945	1589	3.31621e-05	2.12333e-05
		0.175	4584	342	4242	684	4926	0.138855	0.138658		1	1589.97	0.0264051	1589.95	0.0528103	1590	3.3214e-05	2.12333e-05
		0.1747	4585	342	4243	684	4927	0.138827	0.138658		1	1590.97	0.0264632	1590.95	0.0529264	1591	3.32661e-05	2.12333e-05
		0.1745	4586	342	4244	684	4928	0.138799	0.138658		1	1591.97	0.0265215	1591.95	0.0530429	1592	3.33184e-05	2.12333e-05
		0.1743	4587	342	4245	684	4929	0.138771	0.138658		1	1592.97	0.0265799	1592.95	0.0531598	1593	3.33709e-05	2.12333e-05
		0.1741	4588	342	4246	684	4930	0.138742	0.138658		1	1593.97	0.0266385	1593.95	0.053277	1594	3.34234e-05	2.12333e-05
		0.174	4590	342	4248	684	4932	0.138686	0.138658		1	1594.97	0.0266973	1594.95	0.0533945	1595	3.34762e-05	2.12333e-05
		0.1737	4591	342	4249	684	4933	0.138658	0.138658		1	1595.97	0.0267562	1595.95	0.0535125	1596	3.35291e-05	2.12333e-05
		0.1736	4592	343	4249	686	4935	0.139007	0.138923		1	1596.97	0.0268154	1596.95	0.0536308	1597	3.35822e-05	2.12333e-05
		0.1735	4593	343	4250	686	4936	0.138979	0.138923		1	1597.97	0.0268747	1597.95	0.0537494	1598	3.36354e-05	2.12333e-05
		0.1734	4594	343	4251	686	4937	0.138951	0.138923		1	1598.97	0.0269342	1598.95	0.0538684	1599	3.36888e-05	2.12333e-05
[truncated: 4,349 more rows]

## Sheet: Spectral Level Data
Spectral Level Data		Confidence Threshold	Forward	Reverse	Correct	Incorrect	Total	Global FDR	q-value		Fit Confidence Threshold	Fit Forward	Fit Reverse	Fit Correct	Fit Incorrect	Fit Total	Fit Global FDR	Fit Local FDR
[truncated: 15,163 more rows]

[truncated: 13 more sheets: Search Summary, Advanced Metadata, Speed and Distribution Analysis, Single Results Table, Protein FDR Summary, Distinct Peptide FDR Summary, Spectrum FDR Summary, PDST Controls, Protein Summary, Peptide Summary, Distinct Peptide Summary, Feature Summary, Single Column Summary]
