# Supplementary material for: Inhibiting host-protein deposition on urinary catheters reduces associated urinary tract infections
Source: eLife. 2022 Mar 29;11:e75798. doi: 10.7554/eLife.75798 (PMC8986317; doi:10.7554/eLife.75798)
Supplement: Figure 6—source data 1. — Individual data from all figures involving small datasets displayed in individual tabs of this source file. This includes Figures 1B and 2A-F, Figure 3B, Figure 4, Figure 1—figure supplement 1 and Figure 2—figure supplement 1. [file elife-75798-fig6-data1.zip › Flores_Data/AF1_condition-i_vs_condition-j_AFCat1.txt]

A	Coef.Cat_3-Cat_1	Coef.Cat_4-Cat_1	Coef.Cat_5-Cat_1	Coef.Cat_6-Cat_1	Coef.Cat_7-Cat_1	Coef.Cat_8-Cat_1	Coef.Cat_10-Cat_1	Coef.Cat_9-Cat_1	Coef.Cat_4-Cat_3	Coef.Cat_5-Cat_3	Coef.Cat_6-Cat_3	Coef.Cat_7-Cat_3	Coef.Cat_8-Cat_3	Coef.Cat_10-Cat_3	Coef.Cat_9-Cat_3	Coef.Cat_5-Cat_4	Coef.Cat_6-Cat_4	Coef.Cat_7-Cat_4	Coef.Cat_8-Cat_4	Coef.Cat_10-Cat_4	Coef.Cat_9-Cat_4	Coef.Cat_6-Cat_5	Coef.Cat_7-Cat_5	Coef.Cat_8-Cat_5	Coef.Cat_10-Cat_5	Coef.Cat_9-Cat_5	Coef.Cat_7-Cat_6	Coef.Cat_8-Cat_6	Coef.Cat_10-Cat_6	Coef.Cat_9-Cat_6	Coef.Cat_8-Cat_7	Coef.Cat_10-Cat_7	Coef.Cat_9-Cat_7	Coef.Cat_10-Cat_8	Coef.Cat_9-Cat_8	Coef.Cat_9-Cat_10	t.Cat_3-Cat_1	t.Cat_4-Cat_1	t.Cat_5-Cat_1	t.Cat_6-Cat_1	t.Cat_7-Cat_1	t.Cat_8-Cat_1	t.Cat_10-Cat_1	t.Cat_9-Cat_1	t.Cat_4-Cat_3	t.Cat_5-Cat_3	t.Cat_6-Cat_3	t.Cat_7-Cat_3	t.Cat_8-Cat_3
20.75	-2.705	-2.8	-0.513	-2.96	-3.612	-2.283	-3.122	-2.279	-0.095	2.192	-0.256	-0.908	0.422	-0.417	0.426	2.287	-0.161	-0.812	0.517	-0.322	0.521	-2.448	-3.099	-1.77	-2.609	-1.766	-0.652	0.677	-0.161	0.681	1.329	0.491	1.333	-0.839	0.004	0.843	-18.62	-19.28	-3.32	-17.65	-24.87	-15.72	-21.5	-15.69	-1.01	20.33	-2.03	-9.65	4.48
19.74	-2.084	-5.575	-0.437	-5.575	-3.189	-2.717	-5.575	-5.505	-3.491	1.647	-3.491	-1.105	-0.633	-3.491	-3.421	5.138	0	2.386	2.858	0	0.069	-5.138	-2.752	-2.28	-5.138	-5.068	2.386	2.858	0	0.069	0.472	-2.386	-2.316	-2.858	-2.788	0.069	-28.63	-81.64	-5.87	-81.64	-46.7	-10.62	-81.64	-80.63	-51.59	22.26	-51.59	-16.33	-2.48
19.24	0.478	-1.802	-1.16	-1.16	-1.201	-0.977	-1.172	-0.977	-2.28	-1.638	-1.638	-1.68	-1.455	-1.65	-1.455	0.642	0.641	0.6	0.825	0.63	0.825	0	-0.042	0.183	-0.012	0.183	-0.041	0.183	-0.012	0.183	0.224	0.03	0.224	-0.195	0	0.195	8.01	-25.98	-20.86	-20.87	-21.61	-17.58	-21.08	-17.58	-48.11	-71.44	-71.46	-73.26	-63.47
20.54	-2.199	-1.02	-0.042	-2.182	-2.523	-1.194	-2.033	-1.19	1.179	2.157	0.017	-0.325	1.005	0.166	1.009	0.978	-1.162	-1.504	-0.174	-1.013	-0.17	-2.14	-2.481	-1.152	-1.991	-1.148	-0.342	0.988	0.149	0.992	1.329	0.491	1.333	-0.839	0.004	0.843	-15.78	-9.4	-0.3	-20.1	-23.25	-11	-18.73	-10.97	9.18	13.83	0.13	-2.53	7.82
17.72	0	1.289	0	0	0	0.056	0	0.069	1.289	0	0	0	0.056	0	0.069	-1.289	-1.289	-1.289	-1.233	-1.289	-1.219	0	0	0.056	0	0.069	0	0.056	0	0.069	0.056	0	0.069	-0.056	0.014	0.069	0	0	0	0	0	0	0	0	0	0	0	0	0
19.08	-0.418	-1.144	-0.169	-0.245	0.698	0.293	2.499	0.282	-0.727	0.248	0.172	1.116	0.711	2.917	0.7	0.975	0.899	1.843	1.438	3.644	1.427	-0.076	0.867	0.462	2.668	0.451	0.943	0.539	2.744	0.528	-0.405	1.801	-0.416	2.206	-0.011	-2.217	-0.25	-0.69	-0.1	-0.15	0.42	0.18	1.5	0.17	-0.44	0.15	0.1	0.67	0.43
18.44	-0.034	1.264	-0.013	-0.013	-0.033	0.131	-0.018	0.133	1.298	0.021	0.021	0.001	0.165	0.015	0.167	-1.276	-1.277	-1.297	-1.133	-1.282	-1.131	0	-0.02	0.144	-0.006	0.146	-0.02	0.144	-0.005	0.146	0.164	0.015	0.166	-0.15	0.002	0.151	-0.03	1.25	-0.01	-0.01	-0.03	0.13	-0.02	0.13	1.28	0.02	0.02	0	0.16
22.11	2.129	4.199	2.287	2.707	3.184	0.551	1.874	0.555	2.07	0.158	0.578	1.055	-1.579	-0.255	-1.574	-1.912	-1.492	-1.015	-3.649	-2.325	-3.645	0.42	0.896	-1.737	-0.413	-1.733	0.477	-2.157	-0.833	-2.152	-2.633	-1.31	-2.629	1.323	0.004	-1.319	13.56	26.74	14.57	17.24	20.03	3.51	5.06	3.53	13.18	1.01	3.68	6.64	-10.05
19.04	-0.067	0.369	-0.031	-0.032	-0.073	0.151	-0.044	0.151	0.436	0.036	0.035	-0.006	0.219	0.024	0.219	-0.4	-0.401	-0.442	-0.218	-0.412	-0.218	0	-0.042	0.183	-0.012	0.183	-0.041	0.183	-0.012	0.183	0.224	0.03	0.224	-0.195	0	0.195	-16.98	92.91	-7.92	-8.05	-18.15	38.1	-10.94	38.08	109.89	9.05	8.93	-1.45	55.08
19.06	0.429	1.575	-0.169	-0.245	-0.413	0.293	-0.169	0.282	1.146	-0.598	-0.674	-0.842	-0.135	-0.598	-0.146	-1.744	-1.82	-1.988	-1.281	-1.744	-1.292	-0.076	-0.244	0.462	0	0.451	-0.168	0.539	0.076	0.528	0.707	0.244	0.696	-0.462	-0.011	0.451	0.26	0.95	-0.1	-0.15	-0.25	0.18	-0.1	0.17	0.69	-0.36	-0.41	-0.51	-0.08
23.72	0	0.828	0.608	1.847	2.31	1.553	2.477	1.352	0.828	0.608	1.847	2.31	1.553	2.477	1.352	-0.22	1.019	1.482	0.725	1.649	0.524	1.239	1.702	0.945	1.869	0.744	0.463	-0.294	0.63	-0.495	-0.757	0.167	-0.958	0.924	-0.201	-1.125	0	5.46	4.01	12.18	15.23	8.82	16.33	8.91	5.46	4.01	12.18	15.23	8.82
20.78	1.945	2.531	-0.271	1.205	-0.779	0.551	-0.288	0.555	0.586	-2.216	-0.74	-2.724	-1.394	-2.233	-1.39	-2.802	-1.326	-3.31	-1.98	-2.819	-1.976	1.476	-0.508	0.821	-0.017	0.826	-1.984	-0.655	-1.494	-0.651	1.329	0.491	1.333	-0.839	0.004	0.843	30.96	16.85	-4.82	6.47	-13.85	9.79	-5.13	9.87	3.84	-35.27	-3.93	-43.35	-22.2
20.29	0.734	1.026	-0.271	-0.437	-0.779	0.551	-0.288	0.555	0.293	-1.004	-1.171	-1.512	-0.183	-1.022	-0.179	-1.297	-1.463	-1.805	-0.476	-1.314	-0.472	-0.166	-0.508	0.821	-0.017	0.826	-0.342	0.988	0.149	0.992	1.329	0.491	1.333	-0.839	0.004	0.843	13.32	24.77	-6.54	-10.55	-18.8	12.85	-6.96	13.39	5.32	-18.24	-21.26	-27.47	-3.26
20.83	1.773	2.669	0.101	1.383	-0.779	0.551	-0.288	0.555	0.896	-1.673	-0.391	-2.552	-1.223	-2.062	-1.219	-2.569	-1.287	-3.448	-2.119	-2.958	-2.115	1.282	-0.879	0.45	-0.389	0.454	-2.161	-0.832	-1.671	-0.828	1.329	0.491	1.333	-0.839	0.004	0.843	42.81	47.37	1.31	14.38	-18.8	12.85	-6.96	13.39	15.9	-21.81	-4.06	-61.61	-28.54
17.78	0	1.786	0	0	0	0.056	0	0.069	1.786	0	0	0	0.056	0	0.069	-1.786	-1.786	-1.786	-1.731	-1.786	-1.717	0	0	0.056	0	0.069	0	0.056	0	0.069	0.056	0	0.069	-0.056	0.014	0.069	0	0	0	0	0	0	0	0	0	0	0	0	0
17.73	0	1.302	0	0	0	0.056	0	0.069	1.302	0	0	0	0.056	0	0.069	-1.302	-1.302	-1.302	-1.246	-1.302	-1.232	0	0	0.056	0	0.069	0	0.056	0	0.069	0.056	0	0.069	-0.056	0.014	0.069	0	0	0	0	0	0	0	0	0	0	0	0	0
18.46	-0.034	0.534	-0.013	-0.013	-0.033	0.131	0.946	0.133	0.568	0.021	0.021	0.001	0.165	0.98	0.167	-0.546	-0.547	-0.567	-0.403	0.413	-0.401	0	-0.02	0.144	0.959	0.146	-0.02	0.144	0.959	0.146	0.164	0.979	0.166	0.815	0.002	-0.814	-0.03	0.53	-0.01	-0.01	-0.03	0.13	0.89	0.13	0.56	0.02	0.02	0	0.16
19.1	-0.067	0.394	-0.031	-0.032	0.468	0.151	-0.044	0.151	0.462	0.036	0.035	0.535	0.219	0.024	0.219	-0.426	-0.426	0.073	-0.243	-0.438	-0.243	0	0.499	0.183	-0.012	0.183	0.5	0.183	-0.012	0.183	-0.317	-0.512	-0.317	-0.195	0	0.195	-11.66	16.66	-5.44	-5.52	13.25	26.16	-7.54	26.14	19.5	6.22	6.13	15.16	37.82
20.5	1.341	2.311	-0.271	-0.437	-0.779	0.551	-0.288	0.555	0.97	-1.612	-1.778	-2.12	-0.791	-1.63	-0.787	-2.582	-2.748	-3.09	-1.761	-2.599	-1.757	-0.166	-0.508	0.821	-0.017	0.826	-0.342	0.988	0.149	0.992	1.329	0.491	1.333	-0.839	0.004	0.843	26.36	30.89	-6.54	-10.55	-18.8	12.85	-6.96	13.39	12.06	-31.68	-34.95	-41.66	-15.19
26.11	5.268	6.134	4.233	4.233	4.205	0.643	4.866	4.262	0.866	-1.035	-1.035	-1.063	-4.625	-0.401	-1.006	-1.901	-1.901	-1.93	-5.491	-1.268	-1.872	0	-0.028	-3.59	0.634	0.029	-0.028	-3.59	0.634	0.029	-3.562	0.662	0.057	4.223	3.619	-0.604	23.52	27.38	18.89	18.89	18.77	2.06	20.33	18.7	14.04	-16.78	-16.78	-17.24	-20.39
18.42	0.404	0.705	-0.013	-0.013	-0.033	0.131	-0.018	0.133	0.301	-0.416	-0.417	-0.437	-0.273	-0.422	-0.271	-0.718	-0.718	-0.738	-0.574	-0.724	-0.572	0	-0.02	0.144	-0.006	0.146	-0.02	0.144	-0.005	0.146	0.164	0.015	0.166	-0.15	0.002	0.151	0.4	0.7	-0.01	-0.01	-0.03	0.13	-0.02	0.13	0.3	-0.41	-0.41	-0.43	-0.27
17.76	0	1.637	0	0	0	0.056	0	0.069	1.637	0	0	0	0.056	0	0.069	-1.637	-1.637	-1.637	-1.581	-1.637	-1.567	0	0	0.056	0	0.069	0	0.056	0	0.069	0.056	0	0.069	-0.056	0.014	0.069	0	0	0	0	0	0	0	0	0	0	0	0	0
21.09	1.066	1.774	1.39	2.414	0.858	0.551	-0.288	0.555	0.708	0.324	1.347	-0.208	-0.516	-1.355	-0.512	-0.384	0.64	-0.916	-1.224	-2.062	-1.22	1.024	-0.532	-0.839	-1.678	-0.835	-1.555	-1.863	-2.702	-1.859	-0.308	-1.147	-0.304	-0.839	0.004	0.843	12.11	27.95	21.9	38.03	13.52	8.67	-4.54	8.74	8.04	3.67	15.3	-2.36	-5.86
22.1	-0.373	-2.278	1.012	-1.92	-0.081	-0.773	-2.989	0.477	-1.905	1.385	-1.547	0.292	-0.4	-2.616	0.85	3.29	0.358	2.197	1.504	-0.711	2.754	-2.932	-1.093	-1.786	-4.001	-0.536	1.839	1.146	-1.069	2.396	-0.692	-2.908	0.558	-2.216	1.25	3.466	-1.42	-8.66	3.85	-7.3	-0.31	-2.08	-11.37	1.73	-10.77	7.83	-8.74	1.65	-1.27
20.59	-0.83	-3.577	-0.748	0.089	-1.836	1.598	-2.306	1.588	-2.747	0.082	0.919	-1.006	2.428	-1.476	2.419	2.829	3.666	1.741	5.175	1.271	5.165	0.837	-1.088	2.346	-1.558	2.336	-1.925	1.509	-2.395	1.499	3.435	-0.47	3.425	-3.904	-0.01	3.894	-6.85	-29.52	-6.17	0.74	-10.68	11.46	-19.03	13.11	-22.67	0.68	7.59	-5.85	17.42
19.02	1.187	-0.816	-0.169	-0.245	-0.413	0.293	1.094	0.282	-2.002	-1.356	-1.432	-1.6	-0.893	-0.092	-0.904	0.647	0.571	0.402	1.109	1.91	1.098	-0.076	-0.244	0.462	1.263	0.451	-0.168	0.539	1.339	0.528	0.707	1.508	0.696	0.801	-0.011	-0.812	0.71	-0.49	-0.1	-0.15	-0.25	0.18	0.65	0.17	-1.2	-0.81	-0.86	-0.96	-0.54
19.68	-0.451	-0.198	-0.182	-0.258	-0.446	0.369	1.555	0.346	0.253	0.27	0.193	0.005	0.82	2.006	0.797	0.017	-0.06	-0.248	0.567	1.753	0.544	-0.076	-0.265	0.551	1.737	0.528	-0.188	0.627	1.813	0.604	0.815	2.001	0.792	1.186	-0.023	-1.209	-0.76	-0.34	-0.31	-0.44	-0.76	0.62	2.63	0.59	0.43	0.46	0.33	0.01	1.39
19.09	-0.067	0.854	-0.031	-0.032	-0.073	0.151	-0.044	0.151	0.921	0.036	0.035	-0.006	0.219	0.024	0.219	-0.885	-0.886	-0.927	-0.703	-0.897	-0.703	0	-0.042	0.183	-0.012	0.183	-0.041	0.183	-0.012	0.183	0.224	0.03	0.224	-0.195	0	0.195	-11.66	79.88	-5.44	-5.52	-12.67	26.16	-7.54	26.14	86.18	6.22	6.13	-1.01	37.82
25.03	-0.555	0.335	-0.735	-3.081	-3.376	-1.638	-3.363	-2.629	0.89	-0.18	-2.526	-2.821	-1.083	-2.809	-2.074	-1.07	-3.417	-3.711	-1.973	-3.699	-2.964	-2.347	-2.641	-0.903	-2.629	-1.894	-0.294	1.443	-0.282	0.452	1.738	0.012	0.747	-1.725	-0.991	0.734	-5.93	3.59	-5.43	-15.1	-35.9	-17.51	-35.96	-26.89	9.52	-1.33	-12.38	-30	-11.58
19.61	0.422	0.055	-0.182	-0.258	-0.446	0.369	-0.187	0.346	-0.367	-0.604	-0.68	-0.868	-0.053	-0.609	-0.076	-0.237	-0.313	-0.501	0.314	-0.242	0.291	-0.076	-0.265	0.551	-0.006	0.528	-0.188	0.627	0.071	0.604	0.815	0.259	0.792	-0.556	-0.023	0.533	0.65	0.08	-0.28	-0.4	-0.69	0.57	-0.29	0.53	-0.56	-0.93	-1.05	-1.34	-0.08
18.49	1.744	-0.658	-0.019	-0.019	0.692	0.076	-0.025	0.088	-2.403	-1.763	-1.763	-1.052	-1.669	-1.769	-1.656	0.64	0.639	1.35	0.734	0.633	0.746	0	0.711	0.094	-0.006	0.106	0.711	0.094	-0.006	0.107	-0.616	-0.717	-0.604	-0.101	0.012	0.113	1.73	-0.65	-0.02	-0.02	0.68	0.07	-0.03	0.09	-2.38	-1.75	-1.75	-1.04	-1.65
28.05	-1.807	-2.117	-0.26	-3.033	-2.435	-1.987	-3.536	-1.864	-0.311	1.547	-1.227	-0.629	-0.18	-1.729	-0.058	1.857	-0.916	-0.318	0.131	-1.418	0.253	-2.773	-2.176	-1.727	-3.276	-1.604	0.598	1.046	-0.502	1.169	0.449	-1.1	0.571	-1.549	0.122	1.671	-16.4	-18.97	-2.36	-27.54	-22.11	-18.04	-32.1	-16.92	-3.47	17.64	-13.99	-7.17	-2.05
19.13	-0.034	0.15	0.823	2.005	1.847	0.131	2.583	0.133	0.183	0.857	2.039	1.881	0.165	2.617	0.167	0.673	1.856	1.697	-0.018	2.434	-0.017	1.182	1.024	-0.692	1.761	-0.69	-0.158	-1.874	0.578	-1.872	-1.716	0.736	-1.714	2.452	0.002	-2.45	-0.03	0.14	0.78	1.94	1.79	0.13	2.5	0.13	0.18	0.81	1.97	1.82	0.16
17.75	0	1.48	0	0	0	0.056	0	0.069	1.48	0	0	0	0.056	0	0.069	-1.48	-1.48	-1.48	-1.424	-1.48	-1.411	0	0	0.056	0	0.069	0	0.056	0	0.069	0.056	0	0.069	-0.056	0.014	0.069	0	0	0	0	0	0	0	0	0	0	0	0	0
20.05	-0.807	-2.288	-0.271	-0.437	0.773	0.551	0.867	0.555	-1.481	0.537	0.37	1.58	1.358	1.674	1.362	2.017	1.851	3.061	2.839	3.155	2.843	-0.166	1.044	0.821	1.138	0.826	1.21	0.988	1.304	0.992	-0.222	0.094	-0.218	0.316	0.004	-0.312	-19.49	-55.24	-6.54	-10.55	7.85	12.85	14.41	13.39	-35.75	12.95	8.94	16.05	31.69
18.02	0	0	0	0	2.3	0.056	1.672	0.069	0	0	0	2.3	0.056	1.672	0.069	0	0	2.3	0.056	1.672	0.069	0	2.3	0.056	1.672	0.069	2.3	0.056	1.672	0.069	-2.245	-0.629	-2.231	1.616	0.014	-1.602	0	0	0	0	0	0	0	0	0	0	0	0	0
21.16	1.828	2.613	0.259	1.18	0.502	0.551	1.439	0.555	0.785	-1.569	-0.648	-1.326	-1.278	-0.389	-1.274	-2.354	-1.433	-2.111	-2.063	-1.174	-2.059	0.921	0.243	0.292	1.181	0.296	-0.678	-0.63	0.259	-0.626	0.049	0.937	0.053	0.889	0.004	-0.885	13.14	21.9	1.54	9.89	2.02	4.61	7.8	4.65	5.64	-8.57	-4.66	-5.12	-9.18
17.76	0	0	0	0	0	0.056	1.615	0.069	0	0	0	0	0.056	1.615	0.069	0	0	0	0.056	1.615	0.069	0	0	0.056	1.615	0.069	0	0.056	1.615	0.069	0.056	1.615	0.069	1.559	0.014	-1.545	0	0	0	0	0	0	0	0	0	0	0	0	0
18.44	-0.034	0.071	-0.019	-0.019	1.276	0.076	-0.025	0.088	0.104	0.015	0.015	1.309	0.109	0.008	0.121	-0.089	-0.09	1.205	0.005	-0.096	0.017	0	1.294	0.094	-0.006	0.106	1.295	0.094	-0.006	0.107	-1.2	-1.301	-1.188	-0.101	0.012	0.113	-0.03	0.07	-0.02	-0.02	1.26	0.07	-0.03	0.09	0.1	0.01	0.01	1.3	0.11
19.28	0.49	0.46	-0.031	-0.032	-0.073	0.151	1.479	0.151	-0.03	-0.521	-0.522	-0.563	-0.339	0.99	-0.339	-0.492	-0.492	-0.533	-0.309	1.019	-0.309	0	-0.042	0.183	1.511	0.183	-0.041	0.183	1.511	0.183	0.224	1.552	0.224	1.328	0	-1.328	13.7	79.59	-5.44	-5.52	-12.67	26.16	25.15	26.14	-0.83	-14.58	-14.6	-15.75	-9.47
18.46	-0.034	0.665	-0.019	-0.019	-0.04	0.076	0.901	0.088	0.699	0.015	0.015	-0.007	0.109	0.934	0.121	-0.684	-0.684	-0.705	-0.589	0.236	-0.577	0	-0.021	0.094	0.919	0.106	-0.021	0.094	0.92	0.107	0.116	0.941	0.128	0.825	0.012	-0.813	-0.03	0.66	-0.02	-0.02	-0.04	0.07	0.86	0.09	0.69	0.01	0.01	-0.01	0.11
20.79	0.228	0.019	0.626	-0.437	1.524	0.551	2.537	0.555	-0.209	0.398	-0.665	1.296	0.323	2.309	0.327	0.607	-0.456	1.505	0.532	2.518	0.536	-1.063	0.898	-0.076	1.911	-0.072	1.961	0.988	2.974	0.992	-0.974	1.013	-0.969	1.987	0.004	-1.983	2.42	0.18	6.66	-4.65	13.04	5.85	19.68	5.9	-1.99	4.23	-7.07	11.09	3.43
23.77	-0.474	2.641	-0.094	0.569	1.331	0.317	1.848	1.259	3.115	0.38	1.043	1.805	0.791	2.321	1.733	-2.735	-2.072	-1.31	-2.324	-0.794	-1.382	0.663	1.425	0.41	1.941	1.353	0.762	-0.253	1.278	0.69	-1.014	0.516	-0.072	1.531	0.942	-0.588	-2.49	13.87	-0.41	2.99	6.99	1.65	8.71	6.61	16.36	1.65	5.48	9.48	4.11
17.74	0	1.421	0	0	0	0.056	0	0.069	1.421	0	0	0	0.056	0	0.069	-1.421	-1.421	-1.421	-1.365	-1.421	-1.352	0	0	0.056	0	0.069	0	0.056	0	0.069	0.056	0	0.069	-0.056	0.014	0.069	0	0	0	0	0	0	0	0	0	0	0	0	0
21.25	-1.339	-1.138	-0.382	-0.973	0.165	-1.819	1.165	0.052	0.201	0.957	0.366	1.504	-0.48	2.504	1.391	0.756	0.165	1.303	-0.681	2.302	1.19	-0.591	0.547	-1.437	1.546	0.434	1.138	-0.846	2.138	1.025	-1.984	1	-0.113	2.983	1.871	-1.112	-7.21	-6.13	-2.06	-5.24	0.89	-6.96	4.7	0.18	1.08	5.16	1.97	8.1	-1.84
17.87	0	1.249	0	0	1.398	0.056	0	0.069	1.249	0	0	1.398	0.056	0	0.069	-1.249	-1.249	0.15	-1.193	-1.249	-1.179	0	1.398	0.056	0	0.069	1.398	0.056	0	0.069	-1.343	-1.398	-1.329	-0.056	0.014	0.069	0	0	0	0	0	0	0	0	0	0	0	0	0
18.43	1.851	-0.656	-0.013	-0.013	-0.033	0.131	-0.018	0.133	-2.507	-1.864	-1.864	-1.884	-1.72	-1.87	-1.718	0.644	0.643	0.623	0.787	0.638	0.789	0	-0.02	0.144	-0.006	0.146	-0.02	0.144	-0.005	0.146	0.164	0.015	0.166	-0.15	0.002	0.151	1.83	-0.65	-0.01	-0.01	-0.03	0.13	-0.02	0.13	-2.47	-1.84	-1.84	-1.86	-1.7
20.17	-0.032	0.726	-0.271	-0.437	-0.779	0.551	-0.288	0.555	0.759	-0.239	-0.405	-0.746	0.583	-0.256	0.587	-0.997	-1.163	-1.505	-0.176	-1.014	-0.172	-0.166	-0.508	0.821	-0.017	0.826	-0.342	0.988	0.149	0.992	1.329	0.491	1.333	-0.839	0.004	0.843	-0.85	20.17	-7.52	-12.14	-21.63	14.22	-8	15.41	19.95	-6.27	-10.64	-19.63	14.36
17.83	2.266	0	0	0	0	0.056	0	0.069	-2.266	-2.266	-2.266	-2.266	-2.21	-2.266	-2.196	0	0	0	0.056	0	0.069	0	0	0.056	0	0.069	0	0.056	0	0.069	0.056	0	0.069	-0.056	0.014	0.069	0	0	0	0	0	0	0	0	0	0	0	0	0
20.28	-0.602	1.423	-0.271	-0.437	-0.45	0.551	0.248	0.555	2.024	0.331	0.164	0.152	1.152	0.849	1.156	-1.694	-1.86	-1.873	-0.872	-1.175	-0.868	-0.166	-0.179	0.821	0.518	0.826	-0.013	0.988	0.685	0.992	1	0.697	1.005	-0.303	0.004	0.307	-5.61	10.68	-2.88	-4.65	-3.52	5.85	1.67	5.9	14.17	3.08	1.53	1.1	10.74
19.83	1.705	1.46	-1.239	-1.239	-0.617	-1.056	-1.251	-1.056	-0.244	-2.943	-2.944	-2.322	-2.761	-2.955	-2.761	-2.699	-2.7	-2.077	-2.516	-2.711	-2.517	0	0.622	0.183	-0.012	0.183	0.622	0.183	-0.012	0.183	-0.439	-0.634	-0.439	-0.195	0	0.195	27.48	19.65	-21.51	-21.51	-8.65	-18.33	-21.72	-18.34	-4.63	-121.99	-122.01	-47.9	-114.41
18.03	0	1.151	0	0	1.251	0.056	1.658	0.069	1.151	0	0	1.251	0.056	1.658	0.069	-1.151	-1.151	0.1	-1.095	0.508	-1.081	0	1.251	0.056	1.658	0.069	1.251	0.056	1.658	0.069	-1.195	0.407	-1.181	1.603	0.014	-1.589	0	6.98	0	0	7.3	0.92	8.47	1.15	6.98	0	0	7.3	0.92
25.78	2.553	3.864	1.876	1.936	1.875	-3.702	2.368	1.453	1.311	-0.677	-0.617	-0.677	-6.255	-0.185	-1.1	-1.988	-1.928	-1.989	-7.566	-1.496	-2.412	0.061	0	-5.578	0.492	-0.423	-0.061	-5.638	0.431	-0.484	-5.577	0.492	-0.423	6.07	5.154	-0.915	16.61	25.15	12.21	12.6	12.21	-24.09	14.73	9.45	8.53	-4.41	-4.01	-4.41	-40.7
18.03	0	1.501	0	1.378	1.207	0.056	0	0.069	1.501	0	1.378	1.207	0.056	0	0.069	-1.501	-0.123	-0.294	-1.446	-1.501	-1.432	1.378	1.207	0.056	0	0.069	-0.171	-1.323	-1.378	-1.309	-1.151	-1.207	-1.138	-0.056	0.014	0.069	0	24.82	0	7.68	7.16	0.92	0	1.15	24.82	0	7.68	7.16	0.92
18.5	2.648	0.734	0	3.445	1.421	0.056	0	0.069	-1.914	-2.648	0.796	-1.227	-2.593	-2.648	-2.579	-0.734	2.711	0.687	-0.678	-0.734	-0.664	3.445	1.421	0.056	0	0.069	-2.024	-3.389	-3.445	-3.375	-1.365	-1.421	-1.351	-0.056	0.014	0.069	36.18	4.92	0	46.15	7.06	0.76	0	0.95	-12.84	-36.18	10.67	-6.1	-35.42
18.66	-0.034	-0.656	-0.013	-0.013	2.215	0.131	1.663	0.133	-0.622	0.021	0.021	2.249	0.165	1.697	0.167	0.644	0.643	2.872	0.787	2.319	0.789	0	2.228	0.144	1.676	0.146	2.228	0.144	1.676	0.146	-2.084	-0.552	-2.083	1.532	0.002	-1.53	-0.03	-0.65	-0.01	-0.01	2.18	0.13	1.64	0.13	-0.61	0.02	0.02	2.22	0.16
20.1	-0.807	-1.749	-0.271	-0.437	-0.779	0.551	2.332	0.555	-0.942	0.537	0.37	0.029	1.358	3.139	1.362	1.478	1.312	0.97	2.3	4.081	2.304	-0.166	-0.508	0.821	2.602	0.826	-0.342	0.988	2.769	0.992	1.329	3.11	1.333	1.781	0.004	-1.777	-19.49	-18.89	-6.54	-10.55	-18.8	12.85	56.28	13.39	-10.17	12.95	8.94	0.69	31.69
19.08	-0.067	0.729	-0.031	-0.032	-0.073	0.151	-0.044	0.151	0.797	0.036	0.035	-0.006	0.219	0.024	0.219	-0.761	-0.761	-0.803	-0.578	-0.773	-0.578	0	-0.042	0.183	-0.012	0.183	-0.041	0.183	-0.012	0.183	0.224	0.03	0.224	-0.195	0	0.195	-11.66	62.27	-5.44	-5.52	-12.67	26.16	-7.54	26.14	68.02	6.22	6.13	-1.01	37.82
20.35	-0.807	-0.499	-0.271	0.5	0.179	0.551	1.41	0.555	0.309	0.537	1.307	0.987	1.358	2.218	1.362	0.228	0.998	0.678	1.049	1.909	1.053	0.77	0.45	0.821	1.681	0.826	-0.32	0.051	0.911	0.055	0.371	1.231	0.375	0.86	0.004	-0.856	-14.36	-8.87	-4.82	8.89	3.19	9.79	11.97	9.87	5.49	9.55	23.25	17.55	24.16
17.79	1.312	0.575	0	0	0	0.056	0	0.069	-0.737	-1.312	-1.312	-1.312	-1.256	-1.312	-1.242	-0.575	-0.575	-0.575	-0.519	-0.575	-0.506	0	0	0.056	0	0.069	0	0.056	0	0.069	0.056	0	0.069	-0.056	0.014	0.069	0	0	0	0	0	0	0	0	0	0	0	0	0
22.59	-0.929	-2.248	0.102	-1.115	-2.609	1.045	-3.759	0.089	-1.319	1.031	-0.186	-1.679	1.975	-2.83	1.019	2.35	1.133	-0.36	3.294	-1.511	2.338	-1.217	-2.711	0.943	-3.861	-0.013	-1.493	2.161	-2.644	1.205	3.654	-1.15	2.698	-4.804	-0.956	3.848	-3.32	-8.04	0.36	-3.99	-9.33	3.49	-13.45	0.32	-4.72	3.69	-0.67	-6.01	6.59
20.81	0.25	0.532	-0.522	-0.597	0.071	-0.123	0.188	-0.119	0.282	-0.772	-0.847	-0.179	-0.373	-0.062	-0.369	-1.055	-1.129	-0.461	-0.655	-0.344	-0.651	-0.075	0.593	0.399	0.71	0.403	0.668	0.474	0.785	0.478	-0.194	0.117	-0.19	0.311	0.004	-0.307	1.03	2.44	-2.11	-2.39	0.33	-0.57	0.86	-0.55	1.56	-3.59	-3.87	-0.99	-2.07
23.01	-1.297	-3.725	-0.001	0.245	-2.033	1.125	-4.084	1.191	-2.427	1.296	1.543	-0.736	2.422	-2.786	2.488	3.724	3.97	1.692	4.849	-0.359	4.915	0.246	-2.032	1.126	-4.083	1.191	-2.279	0.879	-4.329	0.945	3.158	-2.051	3.224	-5.208	0.066	5.274	-1.89	-7.77	0	0.51	-3.9	2.35	-8.52	2.48	-3.53	1.89	2.24	-1.03	3.52
19.72	-0.451	-1.801	-0.182	-0.258	1.091	0.369	1.975	0.346	-1.349	0.27	0.193	1.542	0.82	2.426	0.797	1.619	1.543	2.891	2.17	3.775	2.147	-0.076	1.272	0.551	2.156	0.528	1.349	0.627	2.233	0.604	-0.722	0.884	-0.745	1.605	-0.023	-1.629	-0.76	-3.03	-0.31	-0.43	1.83	0.62	3.32	0.58	-2.27	0.45	0.32	2.59	1.38
17.61	0.277	0	0	0	0	0.056	0	0.069	-0.277	-0.277	-0.277	-0.277	-0.221	-0.277	-0.208	0	0	0	0.056	0	0.069	0	0	0.056	0	0.069	0	0.056	0	0.069	0.056	0	0.069	-0.056	0.014	0.069	0	0	0	0	0	0	0	0	0	0	0	0	0
19.34	-0.067	0.483	-0.031	0.606	1.894	0.151	-0.044	0.151	0.55	0.036	0.674	1.961	0.219	0.024	0.219	-0.514	0.123	1.411	-0.332	-0.527	-0.332	0.638	1.926	0.183	-0.012	0.183	1.288	-0.455	-0.65	-0.455	-1.743	-1.938	-1.743	-0.195	0	0.195	-11.18	14.12	-5.22	15.65	59.06	25.08	-7.23	25.06	16.09	5.96	17.39	61.16	36.26
18.43	-0.034	0.879	-0.019	-0.019	0.428	0.076	-0.025	0.088	0.913	0.015	0.015	0.462	0.109	0.008	0.121	-0.898	-0.898	-0.452	-0.804	-0.905	-0.792	0	0.447	0.094	-0.006	0.106	0.447	0.094	-0.006	0.107	-0.352	-0.453	-0.34	-0.101	0.012	0.113	-0.03	0.87	-0.02	-0.02	0.42	0.07	-0.03	0.09	0.91	0.01	0.01	0.46	0.11
19.22	0.268	0.343	-0.031	1.263	-0.073	0.151	-0.044	0.151	0.075	-0.299	0.995	-0.341	-0.117	-0.312	-0.117	-0.374	0.92	-0.416	-0.192	-0.387	-0.192	1.294	-0.042	0.183	-0.012	0.183	-1.336	-1.112	-1.307	-1.112	0.224	0.03	0.224	-0.195	0	0.195	8.78	28.95	-4.39	119.41	-10.23	21.12	-6.09	21.11	2.34	-9.81	31.58	-11.18	-3.83
19.72	-0.092	0.392	-0.121	1.087	-0.406	0.333	-0.144	0.36	0.485	-0.028	1.18	-0.313	0.425	-0.052	0.452	-0.513	0.695	-0.798	-0.06	-0.537	-0.033	1.208	-0.285	0.453	-0.024	0.481	-1.493	-0.755	-1.232	-0.727	0.738	0.261	0.765	-0.477	0.027	0.504	-0.13	0.55	-0.17	1.53	-0.57	0.47	-0.2	0.51	0.68	-0.04	1.66	-0.44	0.6
18.45	1.102	0.703	0	2.799	0	0.056	3.217	0.069	-0.399	-1.102	1.697	-1.102	-1.047	2.115	-1.033	-0.703	2.096	-0.703	-0.647	2.514	-0.633	2.799	0	0.056	3.217	0.069	-2.799	-2.744	0.418	-2.73	0.056	3.217	0.069	3.161	0.014	-3.148	6.82	5.34	0	46.28	0	0.92	53.18	1.15	-2	-6.82	10.5	-6.82	-6.48
18.16	-5.209	-5.209	-5.209	-5.209	-5.209	-5.153	-5.209	-5.14	0	0	0	0	0.056	0	0.069	0	0	0	0.056	0	0.069	0	0	0.056	0	0.069	0	0.056	0	0.069	0.056	0	0.069	-0.056	0.014	0.069	0	0	0	0	0	0	0	0	0	0	0	0	0
18.78	2.497	1.965	-0.019	-0.019	-0.04	0.076	-0.025	0.088	-0.532	-2.516	-2.516	-2.538	-2.422	-2.523	-2.41	-1.984	-1.984	-2.006	-1.89	-1.991	-1.878	0	-0.021	0.094	-0.006	0.106	-0.021	0.094	-0.006	0.107	0.116	0.015	0.128	-0.101	0.012	0.113	2.48	1.95	-0.02	-0.02	-0.04	0.07	-0.03	0.09	-0.53	-2.5	-2.5	-2.52	-2.4
20.5	-0.807	0.132	-0.271	-0.007	1.269	0.551	1.586	0.555	0.94	0.537	0.801	2.076	1.358	2.394	1.362	-0.403	-0.139	1.137	0.418	1.454	0.422	0.264	1.54	0.821	1.857	0.826	1.276	0.557	1.593	0.561	-0.718	0.317	-0.714	1.036	0.004	-1.032	-14.36	2.35	-4.82	-0.06	22.57	9.79	24.36	9.87	16.72	9.55	7.67	36.94	24.16
17.94	0	0	0	0	1.54	0.056	1.677	0.069	0	0	0	1.54	0.056	1.677	0.069	0	0	1.54	0.056	1.677	0.069	0	1.54	0.056	1.677	0.069	1.54	0.056	1.677	0.069	-1.484	0.137	-1.47	1.621	0.014	-1.607	0	0	0	0	0	0	0	0	0	0	0	0	0
20.27	0.712	-0.302	-0.271	0	-0.097	0.551	-0.288	0.555	-1.014	-0.983	-0.712	-0.809	-0.162	-1	-0.157	0.031	0.302	0.205	0.852	0.014	0.856	0.271	0.174	0.821	-0.017	0.826	-0.097	0.551	-0.288	0.555	0.647	-0.191	0.651	-0.839	0.004	0.843	3.94	-4.84	-4.82	0	-0.79	9.79	-5.13	9.87	-5.55	-5.44	-3.94	-3.83	-0.89
20.37	0.503	1.972	-0.271	-0.437	-0.779	0.551	-0.288	0.555	1.469	-0.774	-0.94	-1.282	0.047	-0.791	0.051	-2.243	-2.409	-2.751	-1.421	-2.26	-1.417	-0.166	-0.508	0.821	-0.017	0.826	-0.342	0.988	0.149	0.992	1.329	0.491	1.333	-0.839	0.004	0.843	8.65	31.14	-6.54	-10.55	-18.8	12.85	-6.96	13.39	19.48	-13.3	-16.16	-22.03	0.8
24.58	0.43	-3.128	-2.498	1.295	-1.474	0.793	-0.765	0.65	-3.558	-2.928	0.865	-1.904	0.362	-1.196	0.22	0.63	4.423	1.654	3.92	2.362	3.778	3.793	1.024	3.29	1.733	3.148	-2.769	-0.503	-2.061	-0.645	2.266	0.708	2.123	-1.558	-0.143	1.415	1.62	-11.76	-8.32	4.87	-5.54	2.98	-2.88	2.44	-13.37	-9.76	3.25	-7.16	1.36
18.69	-0.034	0.027	-0.013	2.071	-0.033	0.131	1.375	0.133	0.06	0.021	2.104	0.001	0.165	1.409	0.167	-0.039	2.044	-0.06	0.105	1.349	0.106	2.083	-0.02	0.144	1.388	0.146	-2.104	-1.939	-0.695	-1.938	0.164	1.408	0.166	1.244	0.002	-1.243	-0.03	0.03	-0.01	2.04	-0.03	0.13	1.21	0.13	0.06	0.02	2.07	0	0.16
18.37	-0.034	0.681	-0.013	-0.013	-0.033	0.131	-0.018	0.133	0.715	0.021	0.021	0.001	0.165	0.015	0.167	-0.694	-0.694	-0.714	-0.55	-0.699	-0.548	0	-0.02	0.144	-0.006	0.146	-0.02	0.144	-0.005	0.146	0.164	0.015	0.166	-0.15	0.002	0.151	-0.03	0.67	-0.01	-0.01	-0.03	0.13	-0.02	0.13	0.7	0.02	0.02	0	0.16
27.26	-0.953	-1.929	0.816	0.28	2.969	0.76	3.789	1.867	-0.977	1.769	1.232	3.922	1.712	4.741	2.82	2.745	2.209	4.899	2.689	5.718	3.796	-0.537	2.153	-0.057	2.972	1.051	2.69	0.48	3.509	1.588	-2.21	0.819	-1.102	3.029	1.108	-1.921	-8.07	-13.19	6.91	2.37	25.14	6.43	32.08	15.81	-6.68	14.98	10.43	33.21	14.5
25.92	-1.296	-3.646	1.048	-0.132	2.591	0.953	3.793	1.854	-2.35	2.344	1.164	3.887	2.249	5.089	3.15	4.694	3.514	6.237	4.599	7.439	5.5	-1.18	1.542	-0.095	2.745	0.805	2.722	1.085	3.925	1.986	-1.638	1.202	-0.737	2.84	0.901	-1.939	-11.03	-31.02	8.92	-1.12	22.04	7.17	32.27	15.77	-19.99	19.95	9.91	33.07	16.94
19.63	-0.219	-0.281	-0.121	-0.211	0.377	0.333	0.279	0.36	-0.063	0.098	0.008	0.596	0.551	0.498	0.579	0.161	0.071	0.659	0.614	0.561	0.641	-0.09	0.498	0.453	0.4	0.481	0.588	0.543	0.49	0.571	-0.044	-0.098	-0.017	-0.053	0.027	0.081	-0.31	-0.4	-0.17	-0.3	0.53	0.47	0.39	0.51	-0.09	0.14	0.01	0.84	0.77
27.49	0.96	-6.334	0.025	-0.019	-0.142	0.142	-2.634	0.305	-7.294	-0.935	-0.979	-1.102	-0.818	-3.594	-0.655	6.359	6.315	6.192	6.476	3.7	6.639	-0.044	-0.167	0.117	-2.659	0.28	-0.123	0.161	-2.615	0.324	0.284	-2.492	0.447	-2.776	0.163	2.939	6.32	-47.57	0.19	-0.14	-1.07	1.07	-15.34	2.29	-48.04	-6.16	-6.45	-7.26	-5.39
19.68	-0.424	0.168	-0.121	-0.211	-0.406	0.333	1.313	0.36	0.592	0.303	0.213	0.018	0.756	1.736	0.783	-0.289	-0.379	-0.574	0.165	1.145	0.192	-0.09	-0.285	0.453	1.433	0.481	-0.195	0.543	1.523	0.571	0.738	1.718	0.765	0.98	0.027	-0.953	-0.73	0.29	-0.21	-0.36	-0.7	0.57	2.26	0.62	1.02	0.52	0.37	0.03	1.3
17.87	1.329	1.268	0	0	0	0.056	0	0.069	-0.061	-1.329	-1.329	-1.329	-1.273	-1.329	-1.259	-1.268	-1.268	-1.268	-1.212	-1.268	-1.198	0	0	0.056	0	0.069	0	0.056	0	0.069	0.056	0	0.069	-0.056	0.014	0.069	0	0	0	0	0	0	0	0	0	0	0	0	0
27.81	1.562	-5.602	-0.28	-0.324	-0.447	-0.163	-2.254	0	-7.164	-1.842	-1.886	-2.009	-1.725	-3.816	-1.562	5.322	5.278	5.155	5.439	3.348	5.602	-0.044	-0.167	0.117	-1.974	0.28	-0.123	0.161	-1.93	0.324	0.284	-1.807	0.447	-2.091	0.163	2.254	28.49	-99.5	-5.04	-5.15	-8.16	-2.98	-32.8	0	-127.23	-33.14	-29.96	-36.64	-31.46
18.74	-0.034	-0.17	2.263	0.684	1.276	0.076	-0.025	0.088	-0.136	2.297	0.718	1.309	0.109	0.008	0.121	2.433	0.854	1.445	0.245	0.144	0.257	-1.579	-0.987	-2.187	-2.288	-2.175	0.591	-0.609	-0.71	-0.597	-1.2	-1.301	-1.188	-0.101	0.012	0.113	-0.03	-0.16	2.18	0.66	1.12	0.07	-0.02	0.08	-0.13	2.22	0.69	1.15	0.11
26.78	0.521	-6.193	-0.201	-1.012	-0.95	-0.394	-3.195	-0.818	-6.714	-0.722	-1.533	-1.47	-0.915	-3.716	-1.338	5.993	5.181	5.244	5.8	2.998	5.376	-0.811	-0.749	-0.193	-2.994	-0.617	0.063	0.618	-2.183	0.195	0.556	-2.245	0.132	-2.801	-0.424	2.377	2.75	-32.66	-1.06	-5.34	-5.01	-2.08	-16.85	-4.31	-35.4	-3.8	-8.08	-7.75	-4.82
27.51	1.206	-6.334	0.025	-0.019	-0.142	0.142	-2.634	0.305	-7.54	-1.181	-1.225	-1.348	-1.064	-3.84	-0.901	6.359	6.315	6.192	6.476	3.7	6.639	-0.044	-0.167	0.117	-2.659	0.28	-0.123	0.161	-2.615	0.324	0.284	-2.492	0.447	-2.776	0.163	2.939	10.46	-54.93	0.22	-0.16	-1.23	1.23	-16.82	2.65	-65.39	-10.24	-10.62	-11.69	-9.23
19.49	-0.424	-0.101	-0.121	-0.211	-0.406	0.333	-0.144	0.36	0.323	0.303	0.213	0.018	0.756	0.279	0.783	-0.02	-0.11	-0.305	0.433	-0.044	0.461	-0.09	-0.285	0.453	-0.024	0.481	-0.195	0.543	0.066	0.571	0.738	0.261	0.765	-0.477	0.027	0.504	-0.61	-0.14	-0.17	-0.3	-0.58	0.48	-0.21	0.52	0.46	0.44	0.31	0.03	1.09
18.19	0	0	0	0	2.449	0.056	3.042	0.069	0	0	0	2.449	0.056	3.042	0.069	0	0	2.449	0.056	3.042	0.069	0	2.449	0.056	3.042	0.069	2.449	0.056	3.042	0.069	-2.393	0.593	-2.38	2.986	0.014	-2.973	0	0	0	0	0	0	0	0	0	0	0	0	0
26.14	-0.551	-1.928	2.213	0.44	-0.173	3.121	-2.218	3.643	-1.376	2.764	0.991	0.378	3.673	-1.667	4.194	4.14	2.368	1.754	5.049	-0.291	5.571	-1.773	-2.386	0.909	-4.431	1.43	-0.614	2.681	-2.659	3.203	3.295	-2.045	3.817	-5.34	0.522	5.862	-1.2	-4.21	4.83	0.96	-0.24	6.81	-2.71	7.95	-4.39	8.81	3.16	0.6	11.7
18.44	-0.034	0.577	-0.013	-0.013	0.667	0.131	-0.018	0.133	0.611	0.021	0.021	0.7	0.165	0.015	0.167	-0.59	-0.59	0.089	-0.446	-0.596	-0.444	0	0.679	0.144	-0.006	0.146	0.68	0.144	-0.005	0.146	-0.535	-0.685	-0.534	-0.15	0.002	0.151	-0.03	0.57	-0.01	-0.01	0.66	0.13	-0.02	0.13	0.6	0.02	0.02	0.69	0.16
28.24	1.467	3.013	1.057	3.205	-1.176	1.948	1.127	-1.224	1.546	-0.41	1.738	-2.643	0.481	-0.34	-2.691	-1.956	0.193	-4.189	-1.065	-1.886	-4.237	2.149	-2.233	0.891	0.071	-2.281	-4.382	-1.258	-2.078	-4.43	3.124	2.303	-0.048	-0.821	-3.172	-2.351	2.4	4.92	1.73	5.24	-1.92	3.18	1.84	-2	2.53	-0.67	2.84	-4.32	0.79
18.13	0	0	0	0	4.915	0.056	0	0.069	0	0	0	4.915	0.056	0	0.069	0	0	4.915	0.056	0	0.069	0	4.915	0.056	0	0.069	4.915	0.056	0	0.069	-4.86	-4.915	-4.846	-0.056	0.014	0.069	0	0	0	0	0	0	0	0	0	0	0	0	0
17.85	0	0	0	0	2.397	0.056	0	0.069	0	0	0	2.397	0.056	0	0.069	0	0	2.397	0.056	0	0.069	0	2.397	0.056	0	0.069	2.397	0.056	0	0.069	-2.341	-2.397	-2.328	-0.056	0.014	0.069	0	0	0	0	0	0	0	0	0	0	0	0	0
27.09	0.757	-7.717	0.487	0.443	0.32	0.604	-2.758	0.767	-8.474	-0.27	-0.314	-0.437	-0.153	-3.515	0.01	8.203	8.16	8.037	8.321	4.959	8.484	-0.044	-0.167	0.117	-3.244	0.28	-0.123	0.161	-3.201	0.324	0.284	-3.077	0.447	-3.362	0.163	3.525	6.57	-62.84	4.22	3.84	2.77	5.24	-14.66	6.65	-69	-2.35	-2.72	-3.79	-1.33
20.24	-0.807	-0.696	0.108	-0.126	0.981	0.551	0.1	0.555	0.112	0.916	0.681	1.788	1.358	0.907	1.362	0.804	0.569	1.676	1.246	0.795	1.25	-0.235	0.873	0.442	-0.009	0.446	1.107	0.677	0.226	0.681	-0.43	-0.881	-0.426	-0.451	0.004	0.455	-1.95	-1.68	0.26	-0.31	2.12	1.33	0.24	1.34	0.27	2.21	1.64	3.87	3.27
17.77	0	1.734	0	0	0	0.056	0	0.069	1.734	0	0	0	0.056	0	0.069	-1.734	-1.734	-1.734	-1.679	-1.734	-1.665	0	0	0.056	0	0.069	0	0.056	0	0.069	0.056	0	0.069	-0.056	0.014	0.069	0	0	0	0	0	0	0	0	0	0	0	0	0
18.49	0.406	1.315	-0.013	-0.013	-0.033	0.131	-0.018	0.133	0.909	-0.419	-0.419	-0.439	-0.275	-0.425	-0.273	-1.328	-1.328	-1.348	-1.184	-1.333	-1.182	0	-0.02	0.144	-0.006	0.146	-0.02	0.144	-0.005	0.146	0.164	0.015	0.166	-0.15	0.002	0.151	0.4	1.3	-0.01	-0.01	-0.03	0.13	-0.02	0.13	0.9	-0.41	-0.41	-0.43	-0.27
18.38	-0.034	0.763	-0.013	-0.013	-0.033	0.131	-0.018	0.133	0.797	0.021	0.021	0.001	0.165	0.015	0.167	-0.776	-0.776	-0.796	-0.632	-0.781	-0.63	0	-0.02	0.144	-0.006	0.146	-0.02	0.144	-0.005	0.146	0.164	0.015	0.166	-0.15	0.002	0.151	-0.03	0.75	-0.01	-0.01	-0.03	0.13	-0.02	0.13	0.79	0.02	0.02	0	0.16
22.73	-0.27	1.167	0.925	0.789	2.961	1.809	3.832	1.647	1.437	1.195	1.059	3.231	2.078	4.102	1.917	-0.242	-0.378	1.795	0.642	2.666	0.48	-0.136	2.036	0.884	2.907	0.722	2.172	1.019	3.043	0.858	-1.153	0.871	-1.314	2.024	-0.161	-2.185	-0.82	2.96	2.82	2.41	9.04	5.52	11.7	5.03	4.7	5.64	5	15.26	9.82
19.06	-3.043	-3.992	-0.46	-3.349	-3.369	-3.204	-2.365	-3.203	-0.949	2.583	-0.306	-0.326	-0.162	0.678	-0.16	3.532	0.643	0.623	0.787	1.627	0.789	-2.889	-2.909	-2.744	-1.905	-2.743	-0.02	0.144	0.984	0.146	0.164	1.004	0.166	0.839	0.002	-0.838	-3	-3.94	-0.45	-3.3	-3.32	-3.16	-2.22	-3.16	-0.94	2.55	-0.3	-0.32	-0.16
21.34	1.902	4.168	0.659	2.144	0.03	0.551	0.509	0.555	2.267	-1.243	0.243	-1.872	-1.351	-1.393	-1.347	-3.509	-2.024	-4.139	-3.618	-3.659	-3.614	1.486	-0.629	-0.108	-0.15	-0.104	-2.115	-1.594	-1.635	-1.59	0.521	0.48	0.525	-0.041	0.004	0.046	9.45	20.71	2.18	9.1	0.11	2.74	1.83	2.76	11.26	-4.12	1.03	-6.7	-6.71
19.69	-0.067	0.046	-0.121	-0.211	0.089	0.333	0.707	0.36	0.113	-0.054	-0.144	0.156	0.399	0.773	0.427	-0.167	-0.257	0.043	0.286	0.66	0.314	-0.09	0.21	0.453	0.827	0.481	0.3	0.543	0.917	0.571	0.243	0.617	0.271	0.374	0.027	-0.347	-0.08	0.06	-0.15	-0.25	0.11	0.4	0.85	0.43	0.14	-0.06	-0.17	0.19	0.48
22.09	-0.285	-2.758	-1.043	-1.953	-4.348	-0.339	-4.257	-3.414	-2.473	-0.758	-1.668	-4.062	-0.053	-3.971	-3.129	1.715	0.805	-1.59	2.419	-1.499	-0.656	-0.91	-3.305	0.704	-3.214	-2.371	-2.395	1.614	-2.304	-1.461	4.009	0.091	0.934	-3.918	-3.075	0.843	-4.15	-41.75	-18.42	-27.6	-42.96	-5.98	-75.19	-60.31	-32.23	-11.02	-20.64	-37.45	-0.77
21.26	-1.462	-2.847	-1.144	-2.551	-3.138	-1.616	-3.477	-2.634	-1.385	0.318	-1.089	-1.676	-0.154	-2.015	-1.172	1.703	0.296	-0.291	1.232	-0.63	0.213	-1.407	-1.994	-0.472	-2.333	-1.49	-0.586	0.936	-0.926	-0.083	1.522	-0.339	0.504	-1.861	-1.019	0.843	-13.34	-25.98	-10.35	-23.28	-28.63	-7.68	-31.72	-24.03	-12.64	2.88	-9.94	-15.29	-0.73
17.9	0	2.884	0	0	0	0.056	0	0.069	2.884	0	0	0	0.056	0	0.069	-2.884	-2.884	-2.884	-2.829	-2.884	-2.815	0	0	0.056	0	0.069	0	0.056	0	0.069	0.056	0	0.069	-0.056	0.014	0.069	0	0	0	0	0	0	0	0	0	0	0	0	0
26.23	0.588	0.163	-0.597	1.627	0.131	0.676	1.494	0.539	-0.425	-1.185	1.038	-0.458	0.088	0.906	-0.049	-0.76	1.463	-0.033	0.513	1.331	0.376	2.223	0.727	1.273	2.091	1.136	-1.496	-0.951	-0.133	-1.087	0.546	1.364	0.409	0.818	-0.137	-0.955	5.49	1.53	-5.57	15.19	1.22	5.37	13.95	5.04	-3.97	-11.06	9.7	-4.27	0.7
27.55	-1.065	-2.288	-0.213	0	-0.395	0.757	-1.244	1.088	-1.222	0.853	1.065	0.671	1.823	-0.178	2.154	2.075	2.288	1.893	3.045	1.044	3.376	0.213	-0.182	0.97	-1.031	1.301	-0.395	0.757	-1.244	1.088	1.152	-0.849	1.483	-2.001	0.331	2.332	-17.69	-35.86	-3.45	0	-4.94	12.58	-20.65	18.07	-19.16	13.85	17.69	8.4	30.26
29.89	-1.245	-1.7	0.465	-0.243	-0.055	1.37	1.37	1.37	-0.454	1.711	1.003	1.191	2.616	2.616	2.616	2.165	1.457	1.645	3.07	3.07	3.07	-0.708	-0.52	0.905	0.905	0.905	0.188	1.613	1.613	1.613	1.425	1.425	1.425	0	0	0	0	0	0	0	0	0	0	0	0	0	0	0	0
27.52	0.307	1.345	-0.501	1.819	-2.506	0.985	1.087	-1.97	1.038	-0.807	1.512	-2.812	0.678	0.781	-2.277	-1.845	0.474	-3.851	-0.36	-0.257	-3.315	2.32	-2.005	1.486	1.588	-1.47	-4.325	-0.834	-0.732	-3.789	3.491	3.593	0.536	0.102	-2.955	-3.058	4.2	18.43	-4.14	24.92	-34.33	8.91	14.89	-25.16	14.22	-6.68	20.72	-38.53	6.14
26.16	0.588	0.163	-0.927	1.627	0.039	0.768	0.977	0.755	-0.425	-1.515	1.038	-0.55	0.18	0.389	0.166	-1.09	1.463	-0.125	0.605	0.814	0.591	2.553	0.965	1.695	1.904	1.681	-1.588	-0.858	-0.65	-0.872	0.73	0.938	0.716	0.209	-0.014	-0.222	6.24	1.73	-7.36	17.25	0.41	7.61	8.62	8	-4.51	-12.03	11.01	-5.83	1.78
26.5	-0.866	-2.885	-1.226	-0.812	-1.312	-0.323	-1.68	-0.246	-2.019	-0.36	0.054	-0.446	0.543	-0.814	0.62	1.659	2.073	1.573	2.562	1.205	2.639	0.414	-0.086	0.903	-0.454	0.981	-0.5	0.489	-0.868	0.566	0.989	-0.368	1.066	-1.356	0.078	1.434	-7.45	-22.32	-10.15	-6.98	-11.28	-2.78	-14.44	-2.08	-16.08	-3.08	0.48	-3.97	4.84
25.37	-1.25	-0.797	-1.486	-5.837	-5.69	-1.924	-5.945	-3.628	0.452	-0.236	-4.588	-4.44	-0.674	-4.695	-2.379	-0.688	-5.04	-4.892	-1.127	-5.148	-2.831	-4.352	-4.204	-0.439	-4.459	-2.143	0.148	3.913	-0.108	2.209	3.765	-0.255	2.061	-4.021	-1.704	2.317	-6.99	-4.46	-8.31	-21.16	-23.57	-10.77	-32.21	-20.3	2.53	-1.32	-16.63	-18.39	-3.77
24.15	-1.526	-1.584	-1.326	-7.018	-5.121	0.187	-5.614	-1.396	-0.058	0.2	-5.491	-3.595	1.713	-4.087	0.131	0.258	-5.434	-3.537	1.771	-4.03	0.188	-5.692	-3.795	1.513	-4.288	-0.07	1.897	7.205	1.404	5.622	5.308	-0.493	3.725	-5.801	-1.582	4.218	-7.88	-6.83	-6.21	-36.23	-14.01	0.96	-17.27	-7.21	-0.25	0.94	-28.35	-9.84	8.85
28.48	-1.498	-2.201	-0.3	-0.198	0	0.782	-1.11	0.688	-0.704	1.197	1.3	1.498	2.28	0.388	2.186	1.901	2.004	2.201	2.984	1.092	2.89	0.103	0.3	1.083	-0.809	0.989	0.198	0.98	-0.912	0.886	0.782	-1.11	0.688	-1.892	-0.094	1.798	-23.79	-34.97	-4.77	-3.14	0	12.43	-12.1	10.57	-11.88	20.21	21.94	23.79	38.48
25.26	0.054	-1.249	-0.664	0.641	0.984	-1.89	2.503	-0.241	-1.304	-0.718	0.587	0.93	-1.944	2.448	-0.295	0.586	1.891	2.233	-0.64	3.752	1.008	1.305	1.648	-1.226	3.166	0.423	0.343	-2.531	1.861	-0.882	-2.874	1.519	-1.225	4.392	1.649	-2.744	0.21	-4.93	-2.62	2.53	3.88	-3.64	9.88	-0.95	-5.15	-2.83	2.32	3.67	-3.75
24.19	-0.663	-1.301	-1.052	0.408	0.382	-1.717	-2.54	-1.741	-0.638	-0.39	1.071	1.045	-1.054	-1.877	-1.079	0.249	1.709	1.683	-0.416	-1.239	-0.44	1.461	1.435	-0.664	-1.487	-0.689	-0.026	-2.125	-2.948	-2.15	-2.099	-2.922	-2.124	-0.823	-0.025	0.798	-1.06	-2.09	-1.34	0.65	0.61	-1.94	-4.07	-1.96	-1.02	-0.49	1.72	1.68	-1.19
26.36	-0.417	0.075	-0.314	0.118	0.68	0.337	1.927	0.369	0.492	0.103	0.536	1.097	0.754	2.344	0.786	-0.389	0.043	0.605	0.262	1.851	0.293	0.432	0.994	0.651	2.24	0.682	0.562	0.219	1.808	0.25	-0.343	1.246	-0.312	1.589	0.031	-1.558	-3.47	0.63	-2.61	0.99	4.6	2.47	16.05	3.07	4.36	0.91	4.74	7.72	5.78
25.14	-0.379	-1.736	-3.855	0.013	-0.887	0.389	-0.787	-0.087	-1.357	-3.476	0.392	-0.508	0.768	-0.408	0.292	-2.118	1.75	0.849	2.125	0.949	1.649	3.868	2.968	4.244	3.067	3.768	-0.9	0.376	-0.801	-0.1	1.276	0.1	0.8	-1.177	-0.476	0.701	-2.26	-10.36	-10.09	0.08	-5.29	1.83	-3.49	-0.52	-8.1	-9.1	2.34	-3.03	3.61
26.21	0.588	0.163	-0.896	1.742	0.039	0.907	0.977	0.936	-0.425	-1.484	1.154	-0.55	0.318	0.389	0.348	-1.059	1.579	-0.125	0.743	0.814	0.773	2.638	0.934	1.802	1.873	1.832	-1.703	-0.835	-0.765	-0.806	0.868	0.938	0.897	0.07	0.029	-0.041	7.69	2.14	-7.84	22.77	0.51	8.03	9.9	12.23	-5.55	-12.99	15.08	-7.18	2.82
27.13	-0.328	-2.225	-0.517	0.272	-0.586	0.326	-1.196	0.674	-1.896	-0.189	0.601	-0.258	0.654	-0.868	1.002	1.708	2.497	1.638	2.551	1.028	2.899	0.789	-0.069	0.843	-0.68	1.191	-0.859	0.054	-1.469	0.402	0.912	-0.61	1.26	-1.523	0.348	1.871	-4.04	-27.37	-6.36	3.35	-6.39	3.63	-12.81	8.3	-30.64	-3.05	9.7	-3.43	8.97
26.01	-0.647	-3.063	-1.964	-1.088	-0.947	-0.647	-1.606	-0.24	-2.416	-1.317	-0.441	-0.3	0	-0.959	0.407	1.099	1.974	2.116	2.416	1.456	2.822	0.875	1.017	1.317	0.358	1.724	0.142	0.442	-0.518	0.848	0.3	-0.659	0.706	-0.959	0.407	1.366	-5.78	-24.24	-8.79	-9.73	-8.47	-5.78	-14.36	-2.15	-19.12	-5.89	-3.95	-2.68	0
26.38	-0.417	0.075	-0.23	0.135	0.68	0.337	1.988	0.369	0.492	0.187	0.552	1.097	0.754	2.405	0.786	-0.305	0.06	0.605	0.262	1.913	0.293	0.365	0.91	0.567	2.218	0.598	0.545	0.202	1.853	0.234	-0.343	1.308	-0.312	1.65	0.031	-1.619	-4.84	0.87	-2.66	1.56	5.84	3.13	23.05	4.05	7.03	2.68	7.88	10.44	7.92
25.91	-0.187	0.163	-1.014	0.376	0.039	0.676	1.168	0.497	0.351	-0.827	0.564	0.226	0.864	1.356	0.685	-1.178	0.213	-0.125	0.513	1.005	0.334	1.391	1.053	1.691	2.183	1.512	-0.338	0.3	0.792	0.121	0.638	1.13	0.458	0.492	-0.179	-0.671	-1.6	1.4	-7.07	3.22	0.33	5.06	10.01	4.26	3	-5.76	4.83	1.94	6.46
28.08	-1.214	-2.709	-0.256	-0.015	0.322	1.105	-0.364	1.31	-1.496	0.958	1.199	1.536	2.319	0.85	2.524	2.453	2.694	3.031	3.815	2.346	4.02	0.241	0.578	1.362	-0.107	1.567	0.337	1.121	-0.348	1.326	0.783	-0.686	0.989	-1.469	0.205	1.674	-7.07	-15.77	-1.12	-0.07	1.87	6.43	-2.12	7.63	-9.27	4.31	5.69	9.52	14.38
26.81	-0.239	-1.557	0.056	-0.291	-0.187	1.227	-0.934	0.963	-1.318	0.294	-0.052	0.052	1.465	-0.696	1.202	1.613	1.266	1.37	2.784	0.623	2.52	-0.346	-0.242	1.171	-0.99	0.908	0.104	1.517	-0.643	1.254	1.413	-0.747	1.15	-2.161	-0.263	1.898	-3.16	-20.63	0.74	-3.85	-2.47	16.26	-12.38	12.77	-17.47	3.9	-0.69	0.69	19.42
26.5	-0.866	-2.885	-1.226	-0.812	-1.312	-0.348	-1.68	-0.246	-2.019	-0.36	0.054	-0.446	0.518	-0.814	0.62	1.659	2.073	1.573	2.537	1.205	2.639	0.414	-0.086	0.878	-0.454	0.981	-0.5	0.464	-0.868	0.566	0.964	-0.368	1.066	-1.332	0.103	1.434	-6.83	-21.05	-9.57	-6.4	-10.34	-2.75	-13.24	-1.94	-14.8	-2.83	0.43	-3.53	4.1
24.9	-0.672	-2.747	-0.258	0.677	0.447	0.308	-2.58	0.986	-2.074	0.414	1.349	1.12	0.981	-1.908	1.658	2.488	3.424	3.194	3.055	0.167	3.732	0.935	0.705	0.567	-2.322	1.244	-0.23	-0.369	-3.257	0.309	-0.139	-3.027	0.539	-2.888	0.677	3.566	-0.87	-3.57	-0.34	0.88	0.58	0.4	-3.35	1.28	-2.69	0.54	1.75	1.45	1.27
26.03	-0.187	0.163	-0.515	0.588	0.039	0.799	1.223	0.692	0.351	-0.328	0.776	0.226	0.986	1.41	0.88	-0.679	0.425	-0.125	0.636	1.059	0.529	1.104	0.554	1.314	1.738	1.208	-0.55	0.211	0.634	0.104	0.76	1.184	0.654	0.423	-0.107	-0.53	-1.75	1.53	-4.15	5.49	0.36	7.46	11.08	6.47	3.28	-2.64	7.24	2.11	9.21
24.42	-0.78	-4.056	-4.857	-3.848	-3.459	-1.049	-2.046	-2.042	-3.276	-4.077	-3.068	-2.679	-0.269	-1.266	-1.262	-0.801	0.208	0.597	3.007	2.01	2.014	1.01	1.398	3.808	2.811	2.815	0.389	2.798	1.802	1.806	2.41	1.413	1.417	-0.997	-0.993	0.004	-3.81	-19.82	-11.58	-18.8	-14.08	-5.13	-10	-9.98	-16.01	-9.72	-14.99	-10.9	-1.32
21.87	-0.683	-4.459	0.012	-0.278	-0.701	0.008	-2.659	-2.384	-3.775	0.695	0.405	-0.018	0.692	-1.976	-1.701	4.471	4.18	3.757	4.467	1.8	2.075	-0.29	-0.714	-0.004	-2.671	-2.396	-0.423	0.287	-2.38	-2.106	0.71	-1.957	-1.683	-2.667	-2.393	0.275	-0.7	-5.2	0.01	-0.32	-0.82	0.01	-3.1	-2.78	-4.08	0.75	0.44	-0.02	0.63
21.94	-1.361	-5.298	-4.056	-2.012	-2.373	0.888	-4.073	0.113	-3.937	-2.695	-0.651	-1.012	2.249	-2.712	1.474	1.242	3.286	2.924	6.186	1.224	5.411	2.044	1.683	4.944	-0.017	4.169	-0.362	2.9	-2.062	2.125	3.261	-1.7	2.486	-4.961	-0.775	4.186	-6.74	-18.88	-20.09	-9.97	-11.76	4.36	-20.18	0.56	-14.27	-13.81	-3.34	-5.19	11.41
26.14	-0.624	-2.924	-1.825	-1.285	-0.361	-0.703	0.124	-0.805	-2.3	-1.201	-0.661	0.262	-0.08	0.748	-0.181	1.099	1.639	2.562	2.221	3.048	2.119	0.54	1.464	1.122	1.949	1.02	0.923	0.582	1.409	0.48	-0.342	0.486	-0.444	0.827	-0.102	-0.929	-3.11	-14.56	-5.97	-6.4	-1.8	-3.5	0.62	-3.47	-11.45	-3.93	-3.29	1.31	-0.4
23.1	-2.346	-1.688	-3.444	-1.281	-0.631	0.231	0.674	-0.674	0.658	-1.098	1.065	1.716	2.577	3.021	1.672	-1.756	0.407	1.057	1.919	2.362	1.014	2.163	2.813	3.675	4.118	2.77	0.65	1.512	1.956	0.607	0.862	1.305	-0.044	0.443	-0.905	-1.349	-9.9	-7.12	-10.97	-5.41	-2.66	0.91	2.66	-2.85	2.78	-3.5	4.49	7.24	10.1
17.98	0	0	3.614	0	0	0.056	0	0.069	0	3.614	0	0	0.056	0	0.069	3.614	0	0	0.056	0	0.069	-3.614	-3.614	-3.559	-3.614	-3.545	0	0.056	0	0.069	0.056	0	0.069	-0.056	0.014	0.069	0	0	0	0	0	0	0	0	0	0	0	0	0
25.39	-0.765	-2.542	0.042	0.224	0.961	-0.355	1.934	0.082	-1.777	0.807	0.989	1.726	0.41	2.699	0.847	2.584	2.766	3.503	2.187	4.476	2.624	0.181	0.919	-0.397	1.892	0.04	0.737	-0.578	1.71	-0.141	-1.316	0.973	-0.879	2.289	0.437	-1.852	-1.18	-3.92	0.06	0.34	1.48	-0.53	2.98	0.13	-2.74	1.24	1.52	2.66	0.61
19.54	2.46	-1.315	3.662	-0.032	-0.073	0.151	-0.044	0.151	-3.774	1.202	-2.492	-2.533	-2.308	-2.503	-2.308	4.976	1.283	1.241	1.466	1.271	1.466	-3.694	-3.735	-3.51	-3.705	-3.511	-0.041	0.183	-0.012	0.183	0.224	0.03	0.224	-0.195	0	0.195	32.53	-227.4	62.12	-5.52	-12.67	26.16	-7.54	26.14	-49.92	12.56	-32.95	-33.5	-30.53
23.47	-0.192	-0.77	0.466	-1.138	-4.438	-0.891	-4.448	-4.518	-0.578	0.658	-0.946	-4.246	-0.7	-4.256	-4.326	1.236	-0.368	-3.668	-0.122	-3.678	-3.748	-1.604	-4.904	-1.357	-4.914	-4.984	-3.3	0.247	-3.31	-3.38	3.547	-0.01	-0.08	-3.557	-3.626	-0.07	-0.74	-2.96	1.79	-4.38	-10.91	-3.36	-12.95	-17.39	-2.22	2.53	-3.64	-10.44	-2.64
18.49	-0.034	1.779	-0.013	-0.013	-0.033	0.131	-0.018	0.133	1.813	0.021	0.021	0.001	0.165	0.015	0.167	-1.792	-1.792	-1.812	-1.648	-1.798	-1.646	0	-0.02	0.144	-0.006	0.146	-0.02	0.144	-0.005	0.146	0.164	0.015	0.166	-0.15	0.002	0.151	-0.03	1.76	-0.01	-0.01	-0.03	0.13	-0.02	0.13	1.79	0.02	0.02	0	0.16
19.99	-0.807	-0.167	-0.271	-0.437	-0.779	0.551	-0.288	0.555	0.641	0.537	0.37	0.029	1.358	0.519	1.362	-0.104	-0.27	-0.612	0.717	-0.121	0.722	-0.166	-0.508	0.821	-0.017	0.826	-0.342	0.988	0.149	0.992	1.329	0.491	1.333	-0.839	0.004	0.843	-22.43	-4.64	-7.52	-12.14	-21.63	14.22	-8	15.41	17.79	14.9	10.29	0.8	35.08
17.9	1.215	1.625	0	0	0	0.056	0	0.069	0.41	-1.215	-1.215	-1.215	-1.159	-1.215	-1.145	-1.625	-1.625	-1.625	-1.569	-1.625	-1.556	0	0	0.056	0	0.069	0	0.056	0	0.069	0.056	0	0.069	-0.056	0.014	0.069	0	0	0	0	0	0	0	0	0	0	0	0	0
26.15	-2.034	-4.383	0.593	-0.869	2.377	0.215	3.507	1.116	-2.35	2.626	1.164	4.41	2.249	5.54	3.15	4.976	3.514	6.76	4.599	7.89	5.5	-1.462	1.784	-0.377	2.914	0.523	3.246	1.085	4.376	1.986	-2.161	1.13	-1.26	3.291	0.901	-2.39	-18.81	-40.55	5.49	-8.04	14.4	1.72	32.44	10.33	-21.74	24.3	10.77	26.72	17.94
22.06	-3.037	-6.66	-0.197	-5.543	-6.323	-2.691	-5.833	-2.604	-3.623	2.84	-2.506	-3.286	0.346	-2.796	0.434	6.463	1.118	0.337	3.969	0.828	4.057	-5.345	-6.126	-2.494	-5.636	-2.406	-0.781	2.851	-0.29	2.939	3.632	0.491	3.72	-3.141	0.088	3.229	-3.85	-9.9	-0.29	-8.24	-9.4	-3.06	-8.67	-2.9	-4.59	3.6	-3.17	-4.16	0.36
18.1	0	0.698	0	3.981	0	0.056	0	0.069	0.698	0	3.981	0	0.056	0	0.069	-0.698	3.282	-0.698	-0.643	-0.698	-0.629	3.981	0	0.056	0	0.069	-3.981	-3.925	-3.981	-3.911	0.056	0	0.069	-0.056	0.014	0.069	0	0	0	0	0	0	0	0	0	0	0	0	0
17.97	2.411	1.071	0	0	0	0.056	0	0.069	-1.34	-2.411	-2.411	-2.411	-2.355	-2.411	-2.341	-1.071	-1.071	-1.071	-1.016	-1.071	-1.002	0	0	0.056	0	0.069	0	0.056	0	0.069	0.056	0	0.069	-0.056	0.014	0.069	0	0	0	0	0	0	0	0	0	0	0	0	0
17.8	0	0.64	0	0	1.333	0.056	0	0.069	0.64	0	0	1.333	0.056	0	0.069	-0.64	-0.64	0.693	-0.585	-0.64	-0.571	0	1.333	0.056	0	0.069	1.333	0.056	0	0.069	-1.278	-1.333	-1.264	-0.056	0.014	0.069	0	0	0	0	0	0	0	0	0	0	0	0	0
19.27	0.453	1.104	0.814	-0.032	-0.073	0.151	-0.044	0.151	0.651	0.361	-0.485	-0.526	-0.302	-0.497	-0.302	-0.29	-1.136	-1.177	-0.953	-1.147	-0.953	-0.846	-0.887	-0.663	-0.858	-0.663	-0.041	0.183	-0.012	0.183	0.224	0.03	0.224	-0.195	0	0.195	11.9	42.72	16.84	-4.46	-10.23	21.12	-6.09	21.11	14.32	5.91	-12.74	-13.83	-7.93
18.82	1.132	1.543	1.567	2.059	0	0.056	4.882	0.069	0.411	0.435	0.927	-1.132	-1.077	3.749	-1.063	0.024	0.516	-1.543	-1.488	3.339	-1.474	0.492	-1.567	-1.512	3.314	-1.498	-2.059	-2.004	2.822	-1.99	0.056	4.882	0.069	4.826	0.014	-4.812	5.93	19.14	7.06	8.16	0	0.69	60.55	0.86	2.15	1.55	3.03	-5.93	-5.64
18.43	-0.034	1.279	-0.019	-0.019	-0.04	0.076	-0.025	0.088	1.313	0.015	0.015	-0.007	0.109	0.008	0.121	-1.298	-1.298	-1.32	-1.204	-1.305	-1.192	0	-0.021	0.094	-0.006	0.106	-0.021	0.094	-0.006	0.107	0.116	0.015	0.128	-0.101	0.012	0.113	-0.03	1.27	-0.02	-0.02	-0.04	0.07	-0.03	0.09	1.3	0.01	0.01	-0.01	0.11
20.62	1.689	2.645	-0.271	-0.03	-0.779	0.551	-0.288	0.555	0.956	-1.96	-1.72	-2.468	-1.138	-1.977	-1.134	-2.916	-2.676	-3.424	-2.095	-2.933	-2.091	0.24	-0.508	0.821	-0.017	0.826	-0.748	0.581	-0.258	0.585	1.329	0.491	1.333	-0.839	0.004	0.843	17.48	44.26	-4.82	-0.3	-13.85	9.79	-5.13	9.87	9.69	-20.29	-13.35	-25.55	-11.79
17.78	0	1.761	0	0	0	0.056	0	0.069	1.761	0	0	0	0.056	0	0.069	-1.761	-1.761	-1.761	-1.706	-1.761	-1.692	0	0	0.056	0	0.069	0	0.056	0	0.069	0.056	0	0.069	-0.056	0.014	0.069	0	0	0	0	0	0	0	0	0	0	0	0	0
19.15	1.36	0	1.457	2.133	1.241	2.741	0	5.273	-1.36	0.097	0.773	-0.119	1.38	-1.36	3.913	1.457	2.133	1.241	2.741	0	5.273	0.676	-0.216	1.284	-1.457	3.816	-0.892	0.607	-2.133	3.14	1.5	-1.241	4.032	-2.741	2.533	5.273	0.76	0	0.81	1.18	0.69	1.5	0	2.93	-0.76	0.05	0.43	-0.07	0.75
22.57	-0.099	0.515	0.013	0.185	0.164	-0.413	3.311	1.008	0.614	0.112	0.283	0.262	-0.314	3.41	1.107	-0.502	-0.33	-0.351	-0.928	2.796	0.493	0.172	0.151	-0.426	3.298	0.995	-0.021	-0.598	3.127	0.824	-0.577	3.148	0.845	3.724	1.421	-2.303	-0.39	2.08	0.05	0.75	0.66	-1.26	13.36	4.07	2.42	0.44	1.12	1.04	-0.95
20.75	1.689	2.645	-0.271	-0.03	-0.779	0.551	0.84	0.555	0.956	-1.96	-1.72	-2.468	-1.138	-0.849	-1.134	-2.916	-2.676	-3.424	-2.095	-1.805	-2.091	0.24	-0.508	0.821	1.111	0.826	-0.748	0.581	0.871	0.585	1.329	1.619	1.333	0.29	0.004	-0.286	12.81	28.12	-2.88	-0.22	-8.28	5.85	4.09	5.9	7.25	-14.86	-10.33	-18.71	-8.63
17.99	0	0	0	0	0	0.056	3.678	0.069	0	0	0	0	0.056	3.678	0.069	0	0	0	0.056	3.678	0.069	0	0	0.056	3.678	0.069	0	0.056	3.678	0.069	0.056	3.678	0.069	3.623	0.014	-3.609	0	0	0	0	0	0	0	0	0	0	0	0	0
19.57	-1.764	-4.621	-3.338	-1.756	-3.38	-3.155	-3.35	-3.156	-2.858	-1.575	0.008	-1.616	-1.392	-1.587	-1.392	1.283	2.866	1.241	1.466	1.271	1.466	1.583	-0.042	0.183	-0.012	0.183	-1.624	-1.4	-1.595	-1.4	0.224	0.03	0.224	-0.195	0	0.195	-48.07	-193.44	-139.73	-61.17	-141.48	-132.08	-140.24	-132.09	-99.4	-54.77	0.24	-56.22	-48.42
18.11	0.192	-1.842	-0.993	-1.842	-1.842	-1.787	-1.842	-1.773	-2.034	-1.184	-2.034	-2.034	-1.978	-2.034	-1.965	0.85	0	0	0.056	0	0.069	-0.85	-0.85	-0.794	-0.85	-0.78	0	0.056	0	0.069	0.056	0	0.069	-0.056	0.014	0.069	8.18	-78.62	-11.42	-78.62	-78.62	-65.24	-78.62	-70.57	-86.79	-13.63	-86.79	-86.79	-72.24
25.03	-0.382	-0.881	-0.802	-0.378	-2.25	-0.648	-6.597	-1.064	-0.5	-0.421	0.004	-1.868	-0.266	-6.216	-0.683	0.079	0.504	-1.368	0.233	-5.716	-0.183	0.424	-1.448	0.154	-5.795	-0.262	-1.872	-0.27	-6.219	-0.687	1.602	-4.348	1.185	-5.949	-0.416	5.533	-3.45	-7.97	-7.25	-3.42	-17.73	-5.86	-59.66	-9.63	-4.52	-3.8	0.03	-14.73	-2.41
19.05	-0.067	0.462	-0.031	-0.032	-0.073	0.151	-0.044	0.151	0.529	0.036	0.035	-0.006	0.219	0.024	0.219	-0.494	-0.494	-0.535	-0.311	-0.506	-0.311	0	-0.042	0.183	-0.012	0.183	-0.041	0.183	-0.012	0.183	0.224	0.03	0.224	-0.195	0	0.195	-11.66	79.93	-5.44	-5.52	-12.67	26.16	-7.54	26.14	91.59	6.22	6.13	-1.01	37.82
20.37	-1.811	-1.864	-0.996	-3.835	-3.876	-1.964	-3.847	-3.652	-0.053	0.814	-2.024	-2.065	-0.153	-2.036	-1.841	0.867	-1.971	-2.012	-0.1	-1.983	-1.788	-2.838	-2.88	-0.968	-2.85	-2.655	-0.041	1.871	-0.012	0.183	1.912	0.03	0.224	-1.882	-1.688	0.195	-83.82	-238.19	-20.44	-512.3	-517.81	-28.34	-513.85	-487.84	-2.44	15.42	-93.69	-95.61	-2.12
19.76	-0.451	0.498	-0.182	-0.258	1.329	0.369	-0.187	0.346	0.949	0.27	0.193	1.78	0.82	0.264	0.797	-0.68	-0.756	0.831	-0.129	-0.685	-0.152	-0.076	1.51	0.551	-0.006	0.528	1.587	0.627	0.071	0.604	-0.96	-1.516	-0.983	-0.556	-0.023	0.533	-0.69	0.77	-0.28	-0.4	2.05	0.57	-0.29	0.53	1.46	0.41	0.3	2.74	1.26
20.46	0.712	-0.523	0.946	0.755	-0.061	0.551	-0.288	0.555	-1.235	0.234	0.043	-0.772	-0.161	-1	-0.157	1.469	1.278	0.462	1.073	0.235	1.078	-0.191	-1.007	-0.395	-1.234	-0.391	-0.815	-0.204	-1.043	-0.2	0.611	-0.228	0.615	-0.839	0.004	0.843	7.57	-4.98	7.73	3.52	-0.36	5.85	-3.06	5.9	-11.75	1.91	0.2	-4.59	-1.71
18.61	-0.034	1.138	-0.019	1.752	-0.04	0.076	-0.025	0.088	1.171	0.015	1.786	-0.007	0.109	0.008	0.121	-1.156	0.615	-1.178	-1.062	-1.163	-1.05	1.771	-0.021	0.094	-0.006	0.106	-1.793	-1.677	-1.778	-1.665	0.116	0.015	0.128	-0.101	0.012	0.113	-0.03	1.13	-0.02	1.47	-0.04	0.07	-0.03	0.09	1.16	0.01	1.5	-0.01	0.11
20.96	0.571	1.501	0.279	-1.224	0.418	-0.237	-1.076	-0.233	0.93	-0.292	-1.796	-0.153	-0.808	-1.647	-0.804	-1.222	-2.725	-1.082	-1.738	-2.576	-1.734	-1.503	0.139	-0.516	-1.355	-0.512	1.643	0.988	0.149	0.992	-0.655	-1.494	-0.651	-0.839	0.004	0.843	3.28	8.17	1.6	-7.02	2.08	-1.36	-6.17	-1.33	8.41	-3.11	-19.09	-1.11	-8.59
20.55	-1.564	-3.709	-1.195	0.073	-1.85	0.414	-1.709	0.174	-2.146	0.369	1.636	-0.286	1.978	-0.146	1.738	2.514	3.782	1.86	4.124	2	3.884	1.268	-0.655	1.609	-0.514	1.369	-1.922	0.342	-1.782	0.102	2.264	0.14	2.024	-2.124	-0.24	1.884	-11.99	-28.45	-6.49	0.56	-11.46	1.61	-13.11	0.73	-16.46	2	12.55	-1.77	7.68
23.39	-1.138	-3.232	-0.952	0.776	0.698	-1.601	-4.791	-1.315	-2.094	0.186	1.914	1.836	-0.464	-3.653	-0.177	2.28	4.008	3.93	1.63	-1.56	1.917	1.728	1.65	-0.65	-3.839	-0.363	-0.078	-2.378	-5.567	-2.091	-2.3	-5.489	-2.013	-3.19	0.287	3.476	-4.97	-11.29	-2.42	3.39	3.05	-3.44	-20.91	-2.66	-7.32	0.47	8.35	8.01	-1
25.23	-0.703	-2.797	-0.304	0.226	0.879	-0.313	1.242	-0.105	-2.094	0.399	0.928	1.581	0.39	1.945	0.598	2.493	3.022	3.675	2.484	4.038	2.692	0.529	1.182	-0.009	1.545	0.199	0.653	-0.538	1.016	-0.33	-1.191	0.363	-0.983	1.554	0.208	-1.346	-2.15	-8.57	-0.76	0.69	2.69	-0.75	3.8	-0.26	-6.41	1	2.84	4.84	0.93
18.76	0.357	-0.658	-0.019	-0.019	-0.04	0.076	4.509	0.088	-1.016	-0.376	-0.376	-0.397	-0.282	4.152	-0.269	0.64	0.639	0.618	0.734	5.168	0.746	0	-0.021	0.094	4.528	0.106	-0.021	0.094	4.528	0.107	0.116	4.549	0.128	4.434	0.012	-4.421	0.35	-0.65	-0.02	-0.02	-0.04	0.07	4.47	0.09	-1.01	-0.37	-0.37	-0.39	-0.28
20.09	-0.807	-1.779	-0.271	-0.437	0.181	0.551	1.247	0.555	-0.972	0.537	0.37	0.988	1.358	2.055	1.362	1.508	1.342	1.96	2.33	3.027	2.334	-0.166	0.452	0.821	1.518	0.826	0.618	0.988	1.684	0.992	0.37	1.066	0.374	0.697	0.004	-0.693	-14.36	-15.87	-4.82	-7.77	2.98	9.79	19.22	9.87	-8.67	9.55	6.59	16.26	24.16
18.39	-0.034	0.283	-0.013	-0.013	0.533	0.131	-0.018	0.133	0.316	0.021	0.021	0.567	0.165	0.015	0.167	-0.295	-0.296	0.25	-0.151	-0.301	-0.15	0	0.546	0.144	-0.006	0.146	0.546	0.144	-0.005	0.146	-0.402	-0.551	-0.4	-0.15	0.002	0.151	-0.03	0.28	-0.01	-0.01	0.53	0.13	-0.02	0.13	0.31	0.02	0.02	0.56	0.16
20.24	-0.023	0.965	-0.271	-0.122	-0.779	0.551	-0.288	0.555	0.988	-0.248	-0.1	-0.756	0.573	-0.266	0.577	-1.236	-1.088	-1.744	-0.415	-1.254	-0.411	0.148	-0.508	0.821	-0.017	0.826	-0.656	0.673	-0.166	0.677	1.329	0.491	1.333	-0.839	0.004	0.843	-0.32	16.01	-4.82	-1.33	-13.85	9.79	-5.13	9.87	13.51	-3.56	-0.99	-10.83	8.21
22.85	-0.463	-2.885	0.651	-2.467	-2.285	-2.963	-2.708	-6.685	-2.421	1.114	-2.003	-1.822	-2.499	-2.245	-6.221	3.535	0.418	0.599	-0.078	0.177	-3.8	-3.117	-2.936	-3.613	-3.359	-7.335	0.181	-0.496	-0.241	-4.218	-0.677	-0.423	-4.399	0.255	-3.722	-3.977	-1.91	-11.88	2.68	-10.16	-9.41	-5.51	-11.15	-21.37	-9.97	4.59	-8.25	-7.5	-4.64
20.67	1.043	3.161	-0.271	0.547	-0.779	0.551	-0.288	0.555	2.118	-1.313	-0.496	-1.821	-0.492	-1.331	-0.488	-3.432	-2.614	-3.939	-2.61	-3.449	-2.606	0.818	-0.508	0.821	-0.017	0.826	-1.326	0.004	-0.835	0.008	1.329	0.491	1.333	-0.839	0.004	0.843	19.85	76.3	-6.54	4.42	-18.8	12.85	-6.96	13.39	40.33	-25.01	-3.87	-34.67	-9.17
20.12	-0.807	-0.399	-0.271	-0.437	0.611	0.551	-0.288	0.555	0.408	0.537	0.37	1.418	1.358	0.519	1.362	0.128	-0.038	1.01	0.95	0.111	0.954	-0.166	0.882	0.821	-0.017	0.826	1.048	0.988	0.149	0.992	-0.06	-0.899	-0.056	-0.839	0.004	0.843	-19.49	-3.92	-6.54	-10.55	5.7	12.85	-6.96	13.39	4.01	12.95	8.94	13.24	31.69
21.99	-2.031	-3.864	-0.844	-2.258	-4.548	-0.915	-4.319	-1.158	-1.834	1.187	-0.227	-2.517	1.115	-2.288	0.873	3.02	1.606	-0.683	2.949	-0.454	2.707	-1.414	-3.704	-0.071	-3.475	-0.314	-2.29	1.343	-2.061	1.101	3.632	0.229	3.39	-3.403	-0.242	3.161	-12.65	-24.07	-4.87	-14.06	-27.66	-5.13	-26.9	-7.21	-11.42	6.85	-1.42	-15.31	6.25
18.52	-0.034	-0.656	-0.013	-0.013	-0.033	0.131	2.616	0.133	-0.622	0.021	0.021	0.001	0.165	2.65	0.167	0.644	0.643	0.623	0.787	3.272	0.789	0	-0.02	0.144	2.629	0.146	-0.02	0.144	2.629	0.146	0.164	2.649	0.166	2.485	0.002	-2.483	-0.03	-0.65	-0.01	-0.01	-0.03	0.13	2.58	0.13	-0.61	0.02	0.02	0	0.16
18.53	-1.319	-0.49	-1.298	-1.298	-1.318	-1.154	-1.303	-1.152	0.828	0.021	0.021	0.001	0.165	0.015	0.167	-0.807	-0.808	-0.828	-0.663	-0.813	-0.662	0	-0.02	0.144	-0.006	0.146	-0.02	0.144	-0.005	0.146	0.164	0.015	0.166	-0.15	0.002	0.151	-1.18	-0.44	-1.16	-1.16	-1.18	-1.03	-1.17	-1.03	0.82	0.02	0.02	0	0.16
19.15	0.429	-0.509	-0.031	-0.032	1.257	0.151	-0.044	0.151	-0.938	-0.46	-0.46	0.828	-0.277	-0.472	-0.277	0.478	0.478	1.766	0.661	0.466	0.661	0	1.288	0.183	-0.012	0.183	1.289	0.183	-0.012	0.183	-1.105	-1.3	-1.105	-0.195	0	0.195	12.52	-11.69	-5.22	-5.3	22.52	25.08	-7.23	25.06	-17.03	-13.44	-13.45	12.7	-8.1
19.09	-0.067	0.819	-0.031	-0.032	-0.073	0.151	-0.044	0.151	0.887	0.036	0.035	-0.006	0.219	0.024	0.219	-0.851	-0.851	-0.892	-0.668	-0.863	-0.668	0	-0.042	0.183	-0.012	0.183	-0.041	0.183	-0.012	0.183	0.224	0.03	0.224	-0.195	0	0.195	-11.66	53.25	-5.44	-5.52	-12.67	26.16	-7.54	26.14	57.63	6.22	6.13	-1.01	37.82
20.16	-0.807	1.374	-0.271	-0.437	-0.779	0.551	-0.288	0.555	2.182	0.537	0.37	0.029	1.358	0.519	1.362	-1.645	-1.811	-2.153	-0.824	-1.662	-0.82	-0.166	-0.508	0.821	-0.017	0.826	-0.342	0.988	0.149	0.992	1.329	0.491	1.333	-0.839	0.004	0.843	-25.89	44.06	-8.68	-14.01	-24.96	15.74	-9.24	17.78	69.95	17.2	11.87	0.92	38.82
19.3	1.047	-0.077	-0.031	0.922	0.669	0.151	-0.044	0.151	-1.124	-1.078	-0.125	-0.378	-0.896	-1.09	-0.896	0.046	0.999	0.746	0.229	0.034	0.229	0.953	0.7	0.183	-0.012	0.183	-0.253	-0.771	-0.966	-0.771	-0.518	-0.712	-0.518	-0.195	0	0.195	128.25	-5.35	-4.39	18.04	14.74	21.12	-6.09	21.11	-74.99	-132.11	-2.44	-8.3	-109.73
18.51	0	0	0	0	0	2.921	0	5.526	0	0	0	0	2.921	0	5.526	0	0	0	2.921	0	5.526	0	0	2.921	0	5.526	0	2.921	0	5.526	2.921	0	5.526	-2.921	2.605	5.526	0	0	0	0	0	0	0	0	0	0	0	0	0
18.52	0.46	0.443	-0.019	-0.019	1.148	0.076	-0.025	0.088	-0.017	-0.479	-0.479	0.688	-0.384	-0.485	-0.372	-0.462	-0.462	0.705	-0.368	-0.468	-0.355	0	1.166	0.094	-0.006	0.106	1.167	0.094	-0.006	0.107	-1.072	-1.173	-1.06	-0.101	0.012	0.113	0.44	0.43	-0.02	-0.02	1.11	0.07	-0.02	0.08	-0.02	-0.46	-0.46	0.66	-0.37
19.31	-0.067	-0.577	-0.031	-0.032	-0.073	0.151	3.324	0.151	-0.51	0.036	0.035	-0.006	0.219	3.392	0.219	0.546	0.545	0.504	0.728	3.901	0.728	0	-0.042	0.183	3.356	0.183	-0.041	0.183	3.356	0.183	0.224	3.397	0.224	3.173	0	-3.173	-11.66	-14.09	-5.44	-5.52	-12.67	26.16	282.67	26.14	-12.44	6.22	6.13	-1.01	37.82
17.84	0	0.79	1.535	0	0	0.056	0	0.069	0.79	1.535	0	0	0.056	0	0.069	0.744	-0.79	-0.79	-0.735	-0.79	-0.721	-1.535	-1.535	-1.479	-1.535	-1.465	0	0.056	0	0.069	0.056	0	0.069	-0.056	0.014	0.069	0	0	0	0	0	0	0	0	0	0	0	0	0
18.39	-0.034	0.934	-0.019	-0.019	-0.04	0.076	-0.025	0.088	0.967	0.015	0.015	-0.007	0.109	0.008	0.121	-0.953	-0.953	-0.974	-0.858	-0.959	-0.846	0	-0.021	0.094	-0.006	0.106	-0.021	0.094	-0.006	0.107	0.116	0.015	0.128	-0.101	0.012	0.113	-0.03	0.93	-0.02	-0.02	-0.04	0.07	-0.03	0.09	0.96	0.01	0.01	-0.01	0.11
18.42	-0.034	0.652	-0.013	-0.013	0.45	0.131	-0.018	0.133	0.686	0.021	0.021	0.483	0.165	0.015	0.167	-0.665	-0.665	-0.203	-0.521	-0.671	-0.52	0	0.462	0.144	-0.006	0.146	0.463	0.144	-0.005	0.146	-0.318	-0.468	-0.317	-0.15	0.002	0.151	-0.03	0.64	-0.01	-0.01	0.44	0.13	-0.02	0.13	0.68	0.02	0.02	0.48	0.16
18.14	0	0	0	1.964	3.072	0.056	0	0.069	0	0	1.964	3.072	0.056	0	0.069	0	1.964	3.072	0.056	0	0.069	1.964	3.072	0.056	0	0.069	1.109	-1.908	-1.964	-1.894	-3.017	-3.072	-3.003	-0.056	0.014	0.069	0	0	0	0	0	0	0	0	0	0	0	0	0
18.45	-0.034	0.946	-0.019	0.554	-0.04	0.076	-0.025	0.088	0.979	0.015	0.588	-0.007	0.109	0.008	0.121	-0.965	-0.392	-0.986	-0.87	-0.971	-0.858	0.573	-0.021	0.094	-0.006	0.106	-0.594	-0.478	-0.579	-0.466	0.116	0.015	0.128	-0.101	0.012	0.113	-0.03	0.94	-0.02	0.55	-0.04	0.07	-0.03	0.09	0.97	0.01	0.58	-0.01	0.11
17.84	0.974	0	0	0	1.337	0.056	0	0.069	-0.974	-0.974	-0.974	0.364	-0.918	-0.974	-0.904	0	0	1.337	0.056	0	0.069	0	1.337	0.056	0	0.069	1.337	0.056	0	0.069	-1.282	-1.337	-1.268	-0.056	0.014	0.069	0	0	0	0	0	0	0	0	0	0	0	0	0
19.4	1.767	1.815	-0.031	-0.032	-0.073	0.151	-0.044	0.151	0.048	-1.798	-1.799	-1.84	-1.616	-1.811	-1.616	-1.846	-1.847	-1.888	-1.664	-1.859	-1.664	0	-0.042	0.183	-0.012	0.183	-0.041	0.183	-0.012	0.183	0.224	0.03	0.224	-0.195	0	0.195	100.84	70.1	-5.22	-5.3	-12.14	25.08	-7.23	25.06	1.56	-102.64	-102.67	-105.02	-92.21
24.02	2.77	4.524	1.582	2.04	2.794	0.518	2.949	2.77	1.754	-1.188	-0.729	0.024	-2.252	0.179	0	-2.942	-2.484	-1.73	-4.006	-1.575	-1.754	0.459	1.212	-1.064	1.367	1.188	0.753	-1.523	0.908	0.729	-2.276	0.155	-0.024	2.431	2.252	-0.179	5.05	8.26	2.89	3.72	5.02	0.77	5.38	5.05	4.63	-3.14	-1.93	0.06	-4.11
20.1	-0.424	0.261	0.281	-0.211	0.589	0.333	3.629	0.36	0.685	0.705	0.213	1.013	0.756	4.053	0.783	0.02	-0.472	0.328	0.072	3.368	0.099	-0.492	0.308	0.051	3.348	0.079	0.8	0.543	3.84	0.571	-0.257	3.04	-0.229	3.297	0.027	-3.269	-0.73	0.45	0.47	-0.36	1.01	0.57	6.25	0.62	1.18	1.18	0.37	1.74	1.3
20.1	-0.578	0.651	-0.271	-0.437	-0.779	0.551	-0.288	0.555	1.229	0.307	0.141	-0.2	1.129	0.29	1.133	-0.922	-1.088	-1.43	-0.101	-0.939	-0.097	-0.166	-0.508	0.821	-0.017	0.826	-0.342	0.988	0.149	0.992	1.329	0.491	1.333	-0.839	0.004	0.843	-8.81	15.4	-6.54	-10.55	-18.8	12.85	-6.96	13.39	18.58	4.68	2.15	-3.06	16.97
19.73	-0.424	-1.802	-0.121	-0.211	0.76	0.333	2.528	0.36	-1.379	0.303	0.213	1.183	0.756	2.952	0.783	1.682	1.591	2.562	2.135	4.33	2.162	-0.09	0.88	0.453	2.649	0.481	0.97	0.543	2.739	0.571	-0.427	1.768	-0.4	2.195	0.027	-2.168	-0.6	-2.53	-0.17	-0.3	0.97	0.47	3.55	0.51	-1.94	0.43	0.3	1.5	1.06
20.42	-0.119	-0.73	0.49	-1.179	-1.521	-0.192	-1.03	-0.188	-0.611	0.609	-1.061	-1.402	-0.073	-0.912	-0.069	1.22	-0.45	-0.791	0.538	-0.301	0.542	-1.67	-2.011	-0.682	-1.521	-0.678	-0.342	0.988	0.149	0.992	1.329	0.491	1.333	-0.839	0.004	0.843	-0.87	-5.55	3.33	-8.96	-11.56	-1.46	-7.83	-1.43	-8.83	6.37	-15.33	-20.27	-1.06
19.21	0.576	1.3	-0.031	-0.032	-0.073	0.151	-0.044	0.151	0.723	-0.608	-0.608	-0.65	-0.425	-0.62	-0.425	-1.331	-1.332	-1.373	-1.149	-1.343	-1.149	0	-0.042	0.183	-0.012	0.183	-0.041	0.183	-0.012	0.183	0.224	0.03	0.224	-0.195	0	0.195	14.8	54.47	-5.22	-5.3	-12.14	25.08	-7.23	25.06	15.98	-15.61	-15.62	-16.68	-10.92
19.85	0.922	0.4	-0.182	-0.258	-0.111	0.369	0.796	0.346	-0.522	-1.103	-1.18	-1.033	-0.553	-0.126	-0.576	-0.582	-0.658	-0.512	-0.031	0.396	-0.054	-0.076	0.07	0.551	0.978	0.528	0.147	0.627	1.054	0.604	0.481	0.907	0.457	0.427	-0.023	-0.45	1.2	0.52	-0.24	-0.34	-0.14	0.48	1.04	0.45	-0.68	-1.44	-1.54	-1.34	-0.72
19.54	-0.424	-1.247	-0.121	1.425	-0.406	0.333	-0.144	0.36	-0.823	0.303	1.849	0.018	0.756	0.279	0.783	1.126	2.672	0.841	1.579	1.102	1.607	1.546	-0.285	0.453	-0.024	0.481	-1.831	-1.093	-1.57	-1.065	0.738	0.261	0.765	-0.477	0.027	0.504	-0.6	-1.75	-0.17	2	-0.57	0.47	-0.2	0.51	-1.16	0.43	2.6	0.03	1.06
17.94	3.225	0	0	0	0	0.056	0	0.069	-3.225	-3.225	-3.225	-3.225	-3.169	-3.225	-3.155	0	0	0	0.056	0	0.069	0	0	0.056	0	0.069	0	0.056	0	0.069	0.056	0	0.069	-0.056	0.014	0.069	0	0	0	0	0	0	0	0	0	0	0	0	0
20.81	0.137	0.59	-0.271	0.135	1.513	0.551	2.538	0.555	0.453	-0.408	-0.002	1.375	0.413	2.401	0.417	-0.861	-0.455	0.922	-0.04	1.948	-0.036	0.406	1.784	0.821	2.809	0.826	1.377	0.415	2.403	0.419	-0.962	1.026	-0.958	1.988	0.004	-1.984	1.46	4.56	-2.88	0.86	10.32	5.85	11.59	5.9	3.5	-4.34	-0.01	9.38	4.39
19.03	0	0	1.632	0	3.903	0.056	5.051	2.562	0	1.632	0	3.903	0.056	5.051	2.562	1.632	0	3.903	0.056	5.051	2.562	-1.632	2.272	-1.576	3.419	0.93	3.903	0.056	5.051	2.562	-3.848	1.147	-1.342	4.995	2.506	-2.489	0	0	8.76	0	51.55	1	90.58	11.31	0	8.76	0	51.55	1
18.03	0	0	0	0	0	0.056	4.061	0.069	0	0	0	0	0.056	4.061	0.069	0	0	0	0.056	4.061	0.069	0	0	0.056	4.061	0.069	0	0.056	4.061	0.069	0.056	4.061	0.069	4.005	0.014	-3.991	0	0	0	0	0	0	0	0	0	0	0	0	0
19.26	2.034	1.185	3.006	1.337	3.621	0.056	3.942	0.069	-0.849	0.972	-0.697	1.587	-1.978	1.908	-1.965	1.82	0.152	2.436	-1.13	2.757	-1.116	-1.668	0.615	-2.95	0.937	-2.936	2.284	-1.282	2.605	-1.268	-3.565	0.321	-3.551	3.887	0.014	-3.873	19.06	10.64	28.16	5.57	33.93	0.52	31.98	0.65	-7.62	9.1	-2.9	14.87	-18.54
23.06	-0.442	-2.697	0.586	-2.455	-2.256	-2.156	-2.693	-5.901	-2.255	1.028	-2.013	-1.814	-1.714	-2.251	-5.459	3.283	0.242	0.441	0.541	0.004	-3.204	-3.041	-2.842	-2.742	-3.279	-6.487	0.199	0.299	-0.238	-3.446	0.1	-0.437	-3.645	-0.537	-3.745	-3.208	-1.51	-9.22	2	-8.39	-7.71	-4.16	-9.21	-12.88	-7.71	3.51	-6.88	-6.2	-3.31
17.88	0	2.727	0	0	0	0.056	0	0.069	2.727	0	0	0	0.056	0	0.069	-2.727	-2.727	-2.727	-2.672	-2.727	-2.658	0	0	0.056	0	0.069	0	0.056	0	0.069	0.056	0	0.069	-0.056	0.014	0.069	0	0	0	0	0	0	0	0	0	0	0	0	0
19.93	-0.286	0.211	-0.143	-1.102	-1.29	-0.475	-1.031	-0.498	0.497	0.144	-0.816	-1.004	-0.189	-0.745	-0.212	-0.353	-1.313	-1.501	-0.686	-1.242	-0.709	-0.959	-1.148	-0.332	-0.889	-0.355	-0.188	0.627	0.071	0.604	0.815	0.259	0.792	-0.556	-0.023	0.533	-0.35	0.25	-0.16	-1.33	-1.56	-0.57	-1.24	-0.6	0.66	0.18	-1.08	-1.32	-0.25
21.87	-1.176	-3.124	0.441	0.795	3.401	-0.286	5.095	2.635	-1.948	1.617	1.971	4.577	0.891	6.271	3.812	3.565	3.92	6.525	2.839	8.22	5.76	0.354	2.96	-0.727	4.654	2.194	2.606	-1.081	4.3	1.84	-3.687	1.694	-0.766	5.381	2.921	-2.46	-5.19	-15.9	2.24	4.05	17.31	-1.45	25.93	12.89	-12.33	10.24	12.48	28.98	5.64
22.05	-1.023	-0.72	-0.423	-2.236	-3.917	-3.315	-4.154	-2.115	0.303	0.601	-1.213	-2.894	-2.292	-3.13	-1.092	0.298	-1.516	-3.197	-2.595	-3.433	-1.395	-1.814	-3.494	-2.892	-3.731	-1.692	-1.681	-1.079	-1.917	0.121	0.602	-0.237	1.802	-0.839	1.2	2.039	-10.88	-7.44	-3.83	-23.77	-41.64	-35.24	-44.16	-9.89	3.13	5.45	-12.89	-30.76	-24.36
18.55	-0.034	1.182	-0.019	-0.019	1.175	0.076	-0.025	0.088	1.215	0.015	0.015	1.209	0.109	0.008	0.121	-1.201	-1.201	-0.007	-1.106	-1.207	-1.094	0	1.194	0.094	-0.006	0.106	1.194	0.094	-0.006	0.107	-1.1	-1.2	-1.087	-0.101	0.012	0.113	-0.03	1.17	-0.02	-0.02	1.17	0.07	-0.03	0.09	1.21	0.01	0.01	1.2	0.11
17.93	0	0	0	0	0	0.056	3.127	0.069	0	0	0	0	0.056	3.127	0.069	0	0	0	0.056	3.127	0.069	0	0	0.056	3.127	0.069	0	0.056	3.127	0.069	0.056	3.127	0.069	3.072	0.014	-3.058	0	0	0	0	0	0	0	0	0	0	0	0	0
20.09	-0.807	-0.449	-0.271	-0.437	0.431	0.551	-0.288	0.555	0.358	0.537	0.37	1.238	1.358	0.519	1.362	0.178	0.012	0.88	1	0.161	1.004	-0.166	0.702	0.821	-0.017	0.826	0.868	0.988	0.149	0.992	0.12	-0.719	0.124	-0.839	0.004	0.843	-19.49	-6.41	-6.54	-10.55	4.62	12.85	-6.96	13.39	5.11	12.95	8.94	13.28	31.69
19.45	-0.067	-0.054	-0.031	-0.032	-0.073	0.151	4.089	0.151	0.013	0.036	0.035	-0.006	0.219	4.157	0.219	0.023	0.022	-0.019	0.206	4.144	0.205	0	-0.042	0.183	4.121	0.183	-0.041	0.183	4.121	0.183	0.224	4.163	0.224	3.938	0	-3.938	-11.66	-1.02	-5.44	-5.52	-12.67	26.16	277.74	26.14	0.25	6.22	6.13	-1.01	37.82
20.16	-0.807	-1.203	-0.271	1.436	-0.779	0.551	0.398	0.555	-0.395	0.537	2.244	0.029	1.358	1.206	1.362	0.932	2.639	0.424	1.753	1.601	1.757	1.707	-0.508	0.821	0.669	0.826	-2.215	-0.886	-1.038	-0.881	1.329	1.177	1.333	-0.152	0.004	0.156	-19.49	-29.04	-6.54	32.83	-18.8	12.85	3.71	13.39	-9.54	12.95	51.3	0.69	31.69
17.98	0	0.692	0	0	1.272	0.056	1.649	0.069	0.692	0	0	1.272	0.056	1.649	0.069	-0.692	-0.692	0.58	-0.637	0.956	-0.623	0	1.272	0.056	1.649	0.069	1.272	0.056	1.649	0.069	-1.217	0.377	-1.203	1.593	0.014	-1.579	0	5.3	0	0	7.36	0.92	8.44	1.15	5.3	0	0	7.36	0.92
23.16	2.627	5.316	0.095	2.492	2.182	0.596	2.47	0.884	2.689	-2.532	-0.135	-0.446	-2.031	-0.157	-1.743	-5.221	-2.824	-3.134	-4.719	-2.846	-4.432	2.396	2.086	0.501	2.375	0.789	-0.31	-1.895	-0.022	-1.608	-1.585	0.288	-1.298	1.873	0.288	-1.586	7.66	15.49	0.28	7.26	6.36	1.39	7.2	1.92	11.81	-11.13	-0.6	-1.96	-5.9
19.15	-0.016	-0.156	-1.096	-1.186	-1.359	-0.681	-1.113	-0.652	-0.14	-1.08	-1.17	-1.343	-0.665	-1.097	-0.636	-0.94	-1.03	-1.203	-0.525	-0.957	-0.496	-0.09	-0.263	0.414	-0.017	0.444	-0.173	0.505	0.073	0.534	0.678	0.246	0.707	-0.432	0.029	0.461	-0.01	-0.09	-0.65	-0.7	-0.8	-0.4	-0.66	-0.38	-0.08	-0.64	-0.69	-0.79	-0.39
20.6	0.283	1.39	0.09	-0.437	0.269	0.551	1.184	0.555	1.107	-0.193	-0.72	-0.014	0.267	0.901	0.271	-1.3	-1.827	-1.121	-0.84	-0.206	-0.835	-0.527	0.18	0.461	1.094	0.465	0.706	0.988	1.621	0.992	0.281	0.914	0.285	0.633	0.004	-0.629	2.15	14.49	0.71	-4.55	2.65	5.74	11.93	5.78	8.4	-1.25	-5.47	-0.1	2.03
19.36	1.556	-2.493	-1.853	1.149	0.239	-1.759	-1.86	-1.747	-4.049	-3.409	-0.407	-1.318	-3.315	-3.416	-3.303	0.64	3.642	2.731	0.734	0.633	0.746	3.002	2.092	0.094	-0.006	0.106	-0.91	-2.908	-3.009	-2.896	-1.997	-2.098	-1.985	-0.101	0.012	0.113	1.56	-2.49	-1.85	1.15	0.24	-1.76	-1.86	-1.75	-4.05	-3.41	-0.41	-1.32	-3.32
19.28	-1.975	-3.392	-0.856	-2.203	-3.504	-3.389	-3.49	-3.377	-1.417	1.119	-0.228	-1.53	-1.414	-1.515	-1.402	2.536	1.188	-0.113	0.003	-0.098	0.015	-1.347	-2.649	-2.533	-2.634	-2.521	-1.301	-1.185	-1.286	-1.173	0.116	0.015	0.128	-0.101	0.012	0.113	-2.02	-3.47	-0.88	-2.25	-3.58	-3.47	-3.57	-3.45	-1.45	1.14	-0.23	-1.56	-1.45
18.12	1.001	1.338	0	1.398	1.151	0.056	0	0.069	0.337	-1.001	0.397	0.149	-0.946	-1.001	-0.932	-1.338	0.06	-0.188	-1.283	-1.338	-1.269	1.398	1.151	0.056	0	0.069	-0.248	-1.343	-1.398	-1.329	-1.095	-1.151	-1.081	-0.056	0.014	0.069	6.48	22.13	0	7.74	6.98	0.92	0	1.15	2.18	-6.48	1.73	0.69	-6.12
19.89	-0.424	-1.802	3.52	1.414	-0.406	0.333	-0.144	0.36	-1.379	3.944	1.838	0.018	0.756	0.279	0.783	5.322	3.216	1.397	2.135	1.658	2.162	-2.106	-3.926	-3.187	-3.664	-3.16	-1.82	-1.082	-1.559	-1.054	0.738	0.261	0.765	-0.477	0.027	0.504	-0.73	-3.09	6.03	2.42	-0.69	0.57	-0.25	0.62	-2.36	6.76	3.15	0.03	1.3
18.89	-0.39	0.458	-0.102	0.205	-0.365	0.313	-0.119	0.342	0.848	0.288	0.595	0.025	0.703	0.271	0.732	-0.56	-0.253	-0.824	-0.146	-0.577	-0.117	0.307	-0.263	0.414	-0.017	0.444	-0.571	0.107	-0.324	0.136	0.678	0.246	0.707	-0.432	0.029	0.461	-0.23	0.27	-0.06	0.12	-0.21	0.18	-0.07	0.2	0.49	0.17	0.35	0.01	0.41
21.77	1.831	0.971	2.479	2.969	2.595	3.228	-0.06	4.052	-0.861	0.648	1.138	0.764	1.396	-1.891	2.22	1.509	1.999	1.625	2.257	-1.03	3.081	0.49	0.116	0.748	-2.539	1.572	-0.374	0.258	-3.029	1.082	0.633	-2.655	1.456	-3.287	0.824	4.111	5.07	2.63	6.86	8.21	7.18	8.69	-0.12	11.21	-5.14	4.34	7.62	5.11	8.13
18.95	-0.418	-0.247	-0.169	1.412	-0.413	0.293	-0.169	0.282	0.17	0.248	1.829	0.004	0.711	0.248	0.7	0.078	1.659	-0.166	0.541	0.078	0.53	1.581	-0.244	0.462	0	0.451	-1.825	-1.118	-1.581	-1.129	0.707	0.244	0.696	-0.462	-0.011	0.451	-0.25	-0.15	-0.1	0.85	-0.25	0.18	-0.1	0.17	0.1	0.15	1.1	0	0.43
20.2	-0.331	0.774	-0.271	-0.437	-0.271	0.551	-0.288	0.555	1.104	0.06	-0.107	0.059	0.881	0.042	0.885	-1.044	-1.211	-1.045	-0.223	-1.062	-0.219	-0.166	0	0.821	-0.017	0.826	0.166	0.988	0.149	0.992	0.822	-0.017	0.826	-0.839	0.004	0.843	-3.11	13.68	-4.82	-7.77	-2.52	9.79	-5.13	9.87	10.36	0.56	-1	0.42	8.28
20.53	0.284	-2.288	0.139	-0.437	0.801	0.551	3.678	0.555	-2.572	-0.145	-0.721	0.518	0.267	3.394	0.271	2.427	1.851	3.089	2.839	5.966	2.843	-0.576	0.662	0.412	3.539	0.416	1.238	0.988	4.115	0.992	-0.251	2.877	-0.247	3.127	0.004	-3.123	3.02	-24.33	1.06	-4.65	8.52	5.85	26.99	5.9	-27.34	-1.11	-7.66	5.5	2.84
19.25	3.166	1.364	3.92	0	0	0.056	6.535	0.069	-1.802	0.755	-3.166	-3.166	-3.11	3.37	-3.096	2.556	-1.364	-1.364	-1.308	5.172	-1.294	-3.92	-3.92	-3.865	2.615	-3.851	0	0.056	6.535	0.069	0.056	6.535	0.069	6.48	0.014	-6.466	117.58	11.63	71.78	0	0	1.84	242.75	2.5	-15.36	13.82	-117.58	-117.58	-103.2
17.94	0	0	3.26	0	0	0.056	0	0.069	0	3.26	0	0	0.056	0	0.069	3.26	0	0	0.056	0	0.069	-3.26	-3.26	-3.204	-3.26	-3.191	0	0.056	0	0.069	0.056	0	0.069	-0.056	0.014	0.069	0	0	0	0	0	0	0	0	0	0	0	0	0
18.48	-0.034	0.809	0.841	-0.013	-0.033	0.131	-0.018	0.133	0.842	0.875	0.021	0.001	0.165	0.015	0.167	0.033	-0.821	-0.842	-0.677	-0.827	-0.676	-0.854	-0.874	-0.71	-0.86	-0.709	-0.02	0.144	-0.005	0.146	0.164	0.015	0.166	-0.15	0.002	0.151	-0.03	0.8	0.81	-0.01	-0.03	0.13	-0.02	0.13	0.83	0.84	0.02	0	0.16
24.83	4.559	6.326	4.142	6.091	3.544	3.332	-1.539	4.227	1.767	-0.417	1.532	-1.015	-1.228	-6.099	-0.333	-2.184	-0.235	-2.782	-2.994	-7.866	-2.1	1.949	-0.598	-0.81	-5.682	0.085	-2.547	-2.759	-7.631	-1.865	-0.212	-5.084	0.682	-4.871	0.895	5.766	13.99	19.4	12.71	18.68	10.87	9.13	-4.72	12.96	9.32	-2.2	8.08	-5.35	-4.89
18.98	0.986	-1.509	-0.992	-1.94	-1.962	-1.846	-1.947	-1.834	-2.495	-1.977	-2.926	-2.947	-2.831	-2.932	-2.819	0.517	-0.431	-0.452	-0.337	-0.437	-0.325	-0.948	-0.97	-0.854	-0.955	-0.842	-0.021	0.094	-0.006	0.107	0.116	0.015	0.128	-0.101	0.012	0.113	0.88	-1.34	-0.87	-1.73	-1.75	-1.64	-1.73	-1.63	-2.22	-1.73	-2.61	-2.62	-2.52
22.44	-0.031	-4.056	-0.46	-0.83	0.382	2.046	-5.462	3.126	-4.025	-0.43	-0.8	0.413	2.076	-5.431	3.157	3.596	3.225	4.438	6.102	-1.406	7.182	-0.37	0.842	2.506	-5.002	3.586	1.212	2.876	-4.631	3.957	1.664	-5.844	2.744	-7.508	1.08	8.588	-0.25	-36.7	-3.97	-7.52	3.46	13.1	-49.43	28.29	-32.6	-3.35	-6.48	3.34	12.54
18.99	2.851	0	0	3.631	0	2.902	0	3.386	-2.851	-2.851	0.78	-2.851	0.05	-2.851	0.535	0	3.631	0	2.902	0	3.386	3.631	0	2.902	0	3.386	-3.631	-0.73	-3.631	-0.245	2.902	0	3.386	-2.902	0.484	3.386	0	0	0	0	0	0	0	0	0	0	0	0	0
21.93	-1.93	-1.586	0.09	-1.348	1.871	-1.373	2.926	-0.096	0.344	2.02	0.582	3.801	0.557	4.856	1.834	1.676	0.238	3.457	0.213	4.512	1.49	-1.438	1.781	-1.463	2.836	-0.186	3.219	-0.025	4.273	1.251	-3.244	1.055	-1.967	4.299	1.277	-3.022	-12.68	-10.42	0.53	-5.13	12.29	-9.02	19.22	-0.34	2.26	11.85	2.22	24.97	3.66
21.36	0.71	1.947	-0.506	-0.926	0.357	-0.244	2.491	-0.24	1.237	-1.216	-1.635	-0.352	-0.954	1.781	-0.949	-2.453	-2.873	-1.59	-2.191	0.544	-2.187	-0.419	0.863	0.262	2.997	0.266	1.283	0.682	3.417	0.686	-0.601	2.134	-0.597	2.735	0.004	-2.731	2.75	7.53	-1.69	-3.53	1.38	-0.94	9.64	-0.93	6.84	-5.15	-8.76	-1.95	-5.27
22.31	4.968	7.238	0.694	3.652	1.844	0.551	-0.288	0.555	2.271	-4.273	-1.315	-3.124	-4.417	-5.256	-4.413	-6.544	-3.586	-5.394	-6.688	-7.526	-6.683	2.958	1.15	-0.144	-0.983	-0.14	-1.808	-3.102	-3.941	-3.098	-1.293	-2.132	-1.289	-0.839	0.004	0.843	73.35	106.87	4.22	35.68	27.23	8.13	-4.25	8.19	33.53	-25.99	-12.85	-46.12	-65.22
18.91	-0.034	0.53	-0.019	-0.019	1.631	0.076	3.449	0.088	0.563	0.015	0.015	1.665	0.109	3.483	0.121	-0.549	-0.549	1.102	-0.454	2.92	-0.442	0	1.65	0.094	3.468	0.106	1.65	0.094	3.468	0.107	-1.556	1.818	-1.544	3.374	0.012	-3.362	-0.03	0.51	-0.02	-0.02	1.57	0.07	3.33	0.08	0.54	0.01	0.01	1.61	0.11
18.63	-0.034	-0.658	-0.019	-0.019	0.747	0.076	2.957	0.088	-0.625	0.015	0.015	0.781	0.109	2.99	0.121	0.64	0.639	1.406	0.734	3.615	0.746	0	0.766	0.094	2.975	0.106	0.766	0.094	2.976	0.107	-0.672	2.209	-0.66	2.881	0.012	-2.869	-0.03	-0.65	-0.02	-0.02	0.73	0.07	2.93	0.09	-0.62	0.01	0.01	0.76	0.11
19.72	-0.451	-0.683	-0.182	-0.258	1.389	0.369	0.634	0.346	-0.232	0.27	0.193	1.84	0.82	1.086	0.797	0.501	0.425	2.072	1.052	1.317	1.029	-0.076	1.571	0.551	0.816	0.528	1.647	0.627	0.893	0.604	-1.02	-0.755	-1.043	0.265	-0.023	-0.289	-0.51	-0.78	-0.21	-0.29	1.58	0.42	0.71	0.39	-0.26	0.31	0.22	2.1	0.94
19.24	-0.39	-1.144	-0.102	1.487	1.703	0.313	1.289	0.342	-0.754	0.288	1.877	2.093	0.703	1.678	0.732	1.042	2.631	2.846	1.456	2.432	1.485	1.589	1.805	0.414	1.39	0.444	0.216	-1.174	-0.198	-1.145	-1.39	-0.414	-1.361	0.976	0.029	-0.947	-0.28	-0.81	-0.07	1.06	1.21	0.22	0.92	0.24	-0.54	0.21	1.34	1.49	0.5
18.41	-0.034	1.142	-0.019	-0.019	-0.04	0.076	-0.025	0.088	1.176	0.015	0.015	-0.007	0.109	0.008	0.121	-1.161	-1.161	-1.182	-1.066	-1.167	-1.054	0	-0.021	0.094	-0.006	0.106	-0.021	0.094	-0.006	0.107	0.116	0.015	0.128	-0.101	0.012	0.113	-0.03	1.13	-0.02	-0.02	-0.04	0.07	-0.03	0.09	1.17	0.01	0.01	-0.01	0.11
20.25	0.616	0.77	-0.271	-0.437	-0.779	0.551	-0.288	0.555	0.154	-0.887	-1.053	-1.394	-0.065	-0.904	-0.061	-1.041	-1.207	-1.549	-0.22	-1.058	-0.215	-0.166	-0.508	0.821	-0.017	0.826	-0.342	0.988	0.149	0.992	1.329	0.491	1.333	-0.839	0.004	0.843	5.58	9.05	-6.54	-10.55	-18.8	12.85	-6.96	13.39	1.16	-8.03	-9.54	-12.63	-0.59
20.05	-0.49	0.069	-0.271	-0.437	-0.779	0.551	-0.288	0.555	0.56	0.219	0.053	-0.288	1.041	0.202	1.045	-0.34	-0.506	-0.848	0.481	-0.358	0.485	-0.166	-0.508	0.821	-0.017	0.826	-0.342	0.988	0.149	0.992	1.329	0.491	1.333	-0.839	0.004	0.843	-6.54	1.68	-6.54	-10.55	-18.8	12.85	-6.96	13.39	7.46	2.93	0.71	-3.84	13.73
24.63	1.018	1.633	3.217	3.283	6.022	3.237	5.003	3.987	0.615	2.199	2.265	5.004	2.219	3.985	2.969	1.584	1.65	4.389	1.604	3.37	2.354	0.066	2.805	0.02	1.786	0.77	2.739	-0.046	1.72	0.704	-2.785	-1.019	-2.035	1.766	0.75	-1.016	1.38	1.83	4.37	4.46	8.18	4.4	6.8	5.42	0.75	3.43	3.53	7.81	3.46
21.7	-1.868	-3.605	0.087	-0.689	1.241	1.578	3.282	1.889	-1.737	1.955	1.179	3.109	3.446	5.15	3.756	3.692	2.916	4.846	5.183	6.887	5.494	-0.776	1.155	1.491	3.196	1.802	1.93	2.267	3.971	2.577	0.337	2.041	0.647	1.704	0.311	-1.394	-19.15	-36.96	0.89	-7.06	12.73	13.05	33.65	17.04	-24.26	27.3	16.47	43.42	34.07
22.09	1.475	1.92	1.488	2.478	2.602	0.551	3.28	3.456	0.445	0.012	1.003	1.127	-0.925	1.804	1.98	-0.433	0.558	0.682	-1.37	1.36	1.535	0.99	1.115	-0.937	1.792	1.968	0.124	-1.927	0.802	0.978	-2.052	0.678	0.853	2.729	2.905	0.176	11.95	15.56	12.05	16.85	21.08	4.46	26.57	28	3.6	0.1	6.82	9.13	-7.49
17.79	0	1.903	0	0	0	0.056	0	0.069	1.903	0	0	0	0.056	0	0.069	-1.903	-1.903	-1.903	-1.848	-1.903	-1.834	0	0	0.056	0	0.069	0	0.056	0	0.069	0.056	0	0.069	-0.056	0.014	0.069	0	0	0	0	0	0	0	0	0	0	0	0	0
20.79	0.316	1.711	-0.853	-0.399	-1.361	-0.032	0.968	-0.028	1.395	-1.17	-0.716	-1.677	-0.348	0.651	-0.344	-2.564	-2.111	-3.072	-1.743	-0.744	-1.739	0.454	-0.508	0.821	1.821	0.826	-0.962	0.368	1.367	0.372	1.329	2.329	1.333	0.999	0.004	-0.995	1.35	9.74	-4.85	-2.27	-7.74	-0.18	5.2	-0.16	7.32	-6.14	-3.76	-8.8	-1.83
22.84	-0.529	-0.268	-0.13	0.827	2.563	2.469	4.694	2.869	0.261	0.399	1.356	3.092	2.998	5.223	3.399	0.138	1.095	2.831	2.737	4.962	3.137	0.958	2.693	2.599	4.824	3	1.735	1.642	3.867	2.042	-0.094	2.131	0.307	2.225	0.401	-1.825	-1.01	-0.51	-0.21	1.58	4.88	4.7	8.94	5.47	0.63	0.73	3.26	7.44	7.21
20.97	-1.399	-2.529	-1.85	-3.785	-4.127	-2.797	-3.636	-2.793	-1.129	-0.45	-2.386	-2.727	-1.398	-2.237	-1.394	0.679	-1.256	-1.598	-0.269	-1.107	-0.265	-1.935	-2.277	-0.948	-1.786	-0.943	-0.342	0.988	0.149	0.992	1.329	0.491	1.333	-0.839	0.004	0.843	-17.92	-39.72	-32.39	-66.27	-72.25	-48.78	-63.66	-48.91	-14.9	-6.4	-33.88	-38.73	-19.8
21.93	4.354	5.943	1.852	3.247	-0.382	0.551	-0.288	0.555	1.589	-2.502	-1.106	-4.736	-3.803	-4.642	-3.799	-4.091	-2.695	-6.325	-5.392	-6.231	-5.388	1.395	-2.234	-1.301	-2.14	-1.297	-3.63	-2.697	-3.535	-2.693	0.933	0.094	0.937	-0.839	0.004	0.843	20.52	27.67	8.73	12.47	-1.68	2.59	-1.36	2.61	7.4	-11.79	-4.25	-20.85	-17.93
22.03	-1.679	-4.37	-0.617	-1.508	2.685	-1.531	3.691	1.329	-2.691	1.062	0.171	4.364	0.148	5.37	3.008	3.753	2.862	7.054	2.839	8.061	5.699	-0.89	3.302	-0.914	4.308	1.946	4.192	-0.023	5.199	2.836	-4.216	1.006	-1.356	5.222	2.86	-2.362	-7.94	-20.66	-2.92	-7.13	12.69	-7.24	17.45	6.28	-12.72	5.02	0.81	20.63	0.7
18.9	1.13	1.381	-0.013	0.899	-0.033	0.131	1.932	0.133	0.25	-1.143	-0.231	-1.163	-0.999	0.802	-0.997	-1.393	-0.482	-1.414	-1.249	0.551	-1.248	0.912	-0.02	0.144	1.945	0.146	-0.932	-0.768	1.033	-0.766	0.164	1.965	0.166	1.801	0.002	-1.799	1.09	1.34	-0.01	0.84	-0.03	0.13	1.87	0.13	0.24	-1.11	-0.22	-1.13	-0.97
21.58	1.448	3.207	1.437	4.73	-0.341	1.916	-0.288	0.555	1.759	-0.012	3.282	-1.789	0.468	-1.737	-0.894	-1.771	1.523	-3.548	-1.291	-3.496	-2.653	3.293	-1.778	0.479	-1.725	-0.882	-5.071	-2.814	-5.018	-4.175	2.257	0.053	0.895	-2.204	-1.361	0.843	6.98	12.21	6.92	22.78	-1.48	5.54	-1.39	2.67	6.7	-0.06	15.8	-7.76	1.35
25.26	-0.919	-1.122	0.397	-0.852	-2.218	0.071	-4.246	-0.269	-0.203	1.316	0.067	-1.3	0.989	-3.328	0.65	1.519	0.27	-1.097	1.192	-3.125	0.853	-1.248	-2.615	-0.326	-4.643	-0.666	-1.367	0.922	-3.395	0.583	2.289	-2.028	1.949	-4.317	-0.34	3.977	-6.74	-8.22	2.91	-6.24	-16.26	0.52	-22.78	-1.97	-1.49	9.64	0.49	-9.53	7.25
20.72	-0.768	-1.399	0.035	-2.312	-2.654	-1.325	-2.163	-1.321	-0.632	0.802	-1.545	-1.886	-0.557	-1.396	-0.553	1.434	-0.913	-1.254	0.075	-0.764	0.079	-2.347	-2.689	-1.359	-2.198	-1.355	-0.342	0.988	0.149	0.992	1.329	0.491	1.333	-0.839	0.004	0.843	-13.31	-32.05	0.64	-52.95	-60.78	-28.84	-49.54	-30.24	-12.13	13.05	-29.64	-36.2	-10.31
23.06	0.862	-6.964	-2.209	-0.544	-1.424	-0.687	-4.417	-0.738	-7.827	-3.071	-1.406	-2.286	-1.549	-5.279	-1.6	4.756	6.421	5.541	6.278	2.547	6.227	1.665	0.785	1.522	-2.208	1.471	-0.88	-0.143	-3.874	-0.194	0.737	-2.993	0.686	-3.731	-0.051	3.68	3.32	-26.81	-8.5	-2.09	-3.78	-2.4	-15.29	-2.39	-30.13	-11.82	-5.41	-6.07	-5.41
20.04	-3.409	-5.383	-0.69	-4.728	-4.769	-4.545	-4.739	-4.545	-1.974	2.718	-1.319	-1.36	-1.136	-1.331	-1.136	4.692	0.655	0.614	0.838	0.643	0.838	-4.037	-4.079	-3.854	-4.049	-3.854	-0.041	0.183	-0.012	0.183	0.224	0.03	0.224	-0.195	0	0.195	-52.14	-114.59	-21.09	-221.59	-223.53	-213.01	-222.14	-213.01	-26.32	40.56	-21.19	-21.86	-18.25
20.52	1.486	2.059	2.914	1.171	1.102	2.191	0.789	2.077	0.573	1.427	-0.315	-0.385	0.705	-0.698	0.59	0.855	-0.888	-0.958	0.132	-1.27	0.017	-1.743	-1.812	-0.723	-2.125	-0.837	-0.069	1.02	-0.382	0.905	1.089	-0.313	0.975	-1.402	-0.114	1.288	6.71	9.29	13.14	3.36	4.97	5.04	2.6	4.9	2.58	6.44	-0.91	-1.73	1.62
20.35	1.003	1.24	-0.271	-0.437	-0.779	0.551	-0.288	0.555	0.237	-1.274	-1.44	-1.782	-0.453	-1.291	-0.448	-1.511	-1.677	-2.019	-0.69	-1.528	-0.686	-0.166	-0.508	0.821	-0.017	0.826	-0.342	0.988	0.149	0.992	1.329	0.491	1.333	-0.839	0.004	0.843	24.92	34.34	-7.5	-12.1	-21.56	14.19	-7.98	15.36	5.89	-31.65	-35.78	-44.27	-10.61
20.96	-1.431	-1.536	-0.828	-3.265	-3.607	-2.277	-3.116	-2.273	-0.105	0.603	-1.834	-2.176	-0.847	-1.685	-0.842	0.708	-1.729	-2.071	-0.742	-1.58	-0.737	-2.437	-2.779	-1.45	-2.288	-1.446	-0.342	0.988	0.149	0.992	1.329	0.491	1.333	-0.839	0.004	0.843	-23.74	-25.34	-10.49	-54.18	-59.85	-36.78	-51.71	-37.72	-2.87	9.66	-50.95	-60.44	-21.87
20.9	0.151	-6.298	-4.281	-4.447	-3.464	-3.459	-4.298	-3.455	-6.449	-4.432	-4.598	-3.615	-3.61	-4.449	-3.606	2.017	1.851	2.834	2.839	2	2.843	-0.166	0.816	0.821	-0.017	0.826	0.983	0.988	0.149	0.992	0.005	-0.834	0.009	-0.839	0.004	0.843	1.19	-76.17	-51.77	-53.78	-19.38	-41.84	-51.98	-41.79	-57.58	-39.57	-41.05	-18.63	-32.23
25.36	-0.665	-2.11	-0.83	-1.145	-1.333	0.918	-3.469	1.233	-1.446	-0.165	-0.48	-0.669	1.583	-2.804	1.898	1.281	0.965	0.777	3.028	-1.359	3.343	-0.315	-0.504	1.748	-2.639	2.063	-0.188	2.063	-2.324	2.378	2.251	-2.136	2.567	-4.387	0.315	4.702	-3.35	-10.32	-4.19	-5.78	-6.73	4.63	-7.31	6.22	-7.07	-0.83	-2.42	-3.38	7.99
24.15	-0.047	-3.326	0.909	0.003	3.844	-1.107	2.216	0.996	-3.279	0.956	0.05	3.89	-1.061	2.262	1.042	4.235	3.329	7.17	2.219	5.542	4.322	-0.906	2.934	-2.017	1.306	0.086	3.84	-1.111	2.212	0.992	-4.951	-1.628	-2.848	3.323	2.103	-1.22	-0.66	-46.87	12.82	0.04	54.17	-4.91	31.23	7.41	-46.22	13.47	0.59	54.83	-4.71
20.88	-0.382	3.058	-0.271	3.915	-0.779	0.551	-0.288	0.555	3.44	0.111	4.296	-0.397	0.932	0.093	0.936	-3.329	0.856	-3.837	-2.508	-3.347	-2.504	4.186	-0.508	0.821	-0.017	0.826	-4.693	-3.364	-4.203	-3.36	1.329	0.491	1.333	-0.839	0.004	0.843	-8.49	68.03	-6.03	75.28	-17.32	12.1	-6.41	12.34	76.52	2.46	82.62	-8.83	20.48
22.96	0.041	0.646	0.837	0.667	0.982	-2.022	1.909	-1.061	0.605	0.797	0.626	0.941	-2.063	1.868	-1.102	0.192	0.021	0.336	-2.668	1.263	-1.707	-0.171	0.144	-2.86	1.071	-1.899	0.315	-2.689	1.242	-1.728	-3.004	0.927	-2.043	3.931	0.961	-2.97	0.24	3.89	5.04	4.01	5.91	-12.18	11.49	-3.98	3.64	4.8	3.77	5.67	-12.42
19.7	-3.085	-4.333	-0.31	-3.05	-2.304	-2.867	-2.01	-2.867	-1.247	2.776	0.035	0.781	0.219	1.076	0.219	4.023	1.283	2.029	1.466	2.323	1.466	-2.74	-1.994	-2.557	-1.7	-2.557	0.746	0.183	1.04	0.183	-0.563	0.294	-0.563	0.857	0	-0.857	-37.38	-52.49	-2.72	-36.95	-24.87	-34.73	-21	-34.73	-215.75	35.3	6.13	18.41	37.82
20.67	-0.375	-0.827	-0.912	-1.078	0.07	-0.091	2.002	-0.087	-0.452	-0.537	-0.703	0.445	0.284	2.377	0.288	-0.085	-0.251	0.897	0.737	2.83	0.741	-0.166	0.982	0.821	2.914	0.826	1.148	0.988	3.081	0.992	-0.16	1.933	-0.156	2.093	0.004	-2.089	-2.86	-6.32	-6.96	-8.23	0.53	-0.69	11.43	-0.66	-6.76	-8.03	-10.51	6.64	4.25
19.4	-1.948	-2.996	-2.329	-0.718	-2.371	-2.147	-2.342	-2.147	-1.048	-0.382	1.23	-0.424	-0.199	-0.394	-0.199	0.666	2.278	0.625	0.849	0.654	0.849	1.612	-0.042	0.183	-0.012	0.183	-1.653	-1.429	-1.624	-1.429	0.224	0.03	0.224	-0.195	0	0.195	-50.65	-66.17	-128.4	-30.98	-130.7	-118.33	-129.07	-118.34	-19.38	-11	32.71	-12.2	-5.74
20.12	-1.473	-4.292	-2.275	-2.441	-2.783	-1.454	-2.292	-1.449	-2.82	-0.802	-0.969	-1.31	0.019	-0.82	0.023	2.017	1.851	1.51	2.839	2	2.843	-0.166	-0.508	0.821	-0.017	0.826	-0.342	0.988	0.149	0.992	1.329	0.491	1.333	-0.839	0.004	0.843	-20.74	-105.82	-56.08	-60.18	-68.6	-34.42	-56.51	-35.73	-39.78	-11.32	-13.66	-18.48	0.26
22.85	-1.453	-4.323	-0.86	-2.625	-4.246	-1.723	-3.638	-3.644	-2.87	0.594	-1.172	-2.792	-0.27	-2.185	-2.191	3.464	1.698	0.078	2.6	0.686	0.679	-1.766	-3.386	-0.864	-2.778	-2.785	-1.62	0.902	-1.013	-1.019	2.522	0.608	0.601	-1.915	-1.921	-0.007	-3.96	-11.79	-2.3	-7.16	-11.58	-4.7	-9.92	-8.21	-7.83	1.59	-3.2	-7.62	-0.74
21.74	2.827	5.545	0.781	1.753	2.391	0.551	-0.288	0.555	2.718	-2.045	-1.074	-0.436	-2.276	-3.115	-2.272	-4.764	-3.792	-3.154	-4.994	-5.833	-4.99	0.972	1.61	-0.23	-1.069	-0.226	0.638	-1.202	-2.041	-1.198	-1.84	-2.679	-1.836	-0.839	0.004	0.843	14.88	29.06	2.63	9.23	12.59	2.9	-1.52	2.92	14.25	-6.89	-5.65	-2.29	-11.98
20.63	-1.21	-2.864	-0.02	-0.701	1.922	0.897	0.928	-0.021	-1.654	1.19	0.509	3.132	2.107	2.138	1.189	2.844	2.163	4.786	3.761	3.792	2.843	-0.681	1.942	0.917	0.948	-0.001	2.623	1.597	1.629	0.68	-1.025	-0.994	-1.943	0.032	-0.918	-0.949	-4.13	-9.77	-0.07	-2.39	6.55	2.46	3.1	-0.07	-6.63	4.77	2.04	12.55	6.38
25.13	-0.968	-0.802	-0.393	-1.847	-4.101	-1.203	-5.452	-2.732	0.166	0.575	-0.879	-3.132	-0.234	-4.483	-1.764	0.409	-1.045	-3.299	-0.4	-4.649	-1.93	-1.454	-3.707	-0.809	-5.058	-2.339	-2.254	0.644	-3.605	-0.885	2.898	-1.351	1.368	-4.249	-1.53	2.719	-4.42	-3.66	-1.79	-8.43	-13.42	-5.49	-24.87	-12.15	0.76	2.62	-4.01	-10.25	-1.07
19.05	-0.034	-0.658	4.079	3.475	-0.04	0.076	-0.025	0.088	-0.625	4.113	3.508	-0.007	0.109	0.008	0.121	4.738	4.133	0.618	0.734	0.633	0.746	-0.605	-4.119	-4.004	-4.105	-3.992	-3.515	-3.399	-3.5	-3.387	0.116	0.015	0.128	-0.101	0.012	0.113	-0.03	-0.67	4.13	3.52	-0.04	0.08	-0.03	0.09	-0.63	4.17	3.55	-0.01	0.11
22.92	0.881	2.273	-0.861	-0.327	0.465	-0.542	1.477	1.475	1.392	-1.741	-1.207	-0.416	-1.422	0.597	0.594	-3.133	-2.599	-1.808	-2.814	-0.795	-0.798	0.534	1.325	0.319	2.338	2.335	0.791	-0.215	1.804	1.801	-1.006	1.013	1.01	2.019	2.016	-0.003	6.5	16.77	-6.35	-2.41	3.43	-2.19	10.9	10.88	10.27	-12.85	-8.91	-3.07	-5.76
19.44	-0.302	-0.682	-1.668	-1.668	-1.709	-1.485	-1.68	-1.485	-0.38	-1.366	-1.366	-1.407	-1.183	-1.378	-1.183	-0.986	-0.986	-1.027	-0.803	-0.998	-0.803	0	-0.042	0.183	-0.012	0.183	-0.041	0.183	-0.012	0.183	0.224	0.03	0.224	-0.195	0	0.195	-4.46	-10.03	-24.94	-24.94	-25.56	-22.2	-25.12	-22.21	-21.3	-106.08	-106.11	-109.32	-91.89
18.97	-3.362	-4.366	1.098	-2.684	-4.366	-4.311	-4.366	-4.297	-1.005	4.46	0.678	-1.005	-0.949	-1.005	-0.935	5.465	1.682	0	0.056	0	0.069	-3.782	-5.465	-5.409	-5.465	-5.395	-1.682	-1.627	-1.682	-1.613	0.056	0	0.069	-0.056	0.014	0.069	-21.72	-72.19	14.84	-13.61	-72.19	-71.27	-72.19	-71.04	-6.49	27.78	2.79	-6.49	-6.13
30.54	0	0	0	-1.165	-0.453	-0.905	-1.724	-0.905	0	0	-1.165	-0.453	-0.905	-1.724	-0.905	0	-1.165	-0.453	-0.905	-1.724	-0.905	-1.165	-0.453	-0.905	-1.724	-0.905	0.712	0.26	-0.559	0.26	-0.453	-1.272	-0.453	-0.819	0	0.819	0	0	0	0	0	-334.42	0	-334.42	0	0	0	0	-435.62
21.61	-0.899	0.37	-1.011	-0.362	0.381	-1.199	1.159	-1.195	1.269	-0.113	0.537	1.28	-0.301	2.057	-0.296	-1.382	-0.732	0.011	-1.57	0.788	-1.566	0.65	1.392	-0.188	2.17	-0.184	0.743	-0.838	1.52	-0.834	-1.581	0.778	-1.576	2.358	0.004	-2.354	-8.75	3.61	-4.94	-3.52	3.71	-11.68	8.97	-11.64	13.5	-0.56	5.71	13.61	-3.2
19.69	-0.032	0.85	-0.182	-0.258	-0.02	0.369	-0.187	0.346	0.882	-0.15	-0.226	0.012	0.401	-0.155	0.378	-1.032	-1.108	-0.87	-0.481	-1.037	-0.504	-0.076	0.161	0.551	-0.006	0.528	0.238	0.627	0.071	0.604	0.389	-0.167	0.366	-0.556	-0.023	0.533	-0.04	0.97	-0.21	-0.29	-0.02	0.42	-0.21	0.39	1.01	-0.17	-0.26	0.01	0.46
20.14	-0.807	-0.993	-0.271	1.784	-0.779	0.551	-0.288	0.555	-0.185	0.537	2.591	0.029	1.358	0.519	1.362	0.722	2.777	0.214	1.543	0.705	1.547	2.055	-0.508	0.821	-0.017	0.826	-2.562	-1.233	-2.072	-1.229	1.329	0.491	1.333	-0.839	0.004	0.843	-19.49	-13.97	-6.54	43.06	-18.8	12.85	-6.96	13.39	-2.61	12.95	62.55	0.69	31.69
22.94	3.915	6.87	1.799	4.772	2.017	3.008	-0.288	2.857	2.955	-2.116	0.858	-1.898	-0.907	-4.203	-1.058	-5.071	-2.097	-4.852	-3.862	-7.158	-4.013	2.974	0.218	1.209	-2.087	1.058	-2.755	-1.765	-5.061	-1.915	0.991	-2.305	0.84	-3.296	-0.151	3.145	41.86	73.45	14.36	51.03	21.57	24.56	-3.08	24.96	31.59	-16.9	9.17	-20.29	-7.4
19.98	-0.424	1.851	-0.121	-0.211	0.18	0.333	1.762	0.36	2.275	0.303	0.213	0.603	0.756	2.185	0.783	-1.972	-2.062	-1.671	-1.519	-0.09	-1.491	-0.09	0.301	0.453	1.882	0.481	0.391	0.543	1.972	0.571	0.153	1.582	0.18	1.429	0.027	-1.402	-0.6	2.6	-0.17	-0.3	0.25	0.47	2.48	0.51	3.2	0.43	0.3	0.85	1.06
21.2	-1.266	-0.191	-1.952	-2.118	-0.079	-1.13	2.004	-1.126	1.076	-0.685	-0.851	1.188	0.136	3.27	0.14	-1.761	-1.927	0.112	-0.939	2.195	-0.935	-0.166	1.873	0.821	3.955	0.826	2.039	0.988	4.122	0.992	-1.052	2.082	-1.048	3.134	0.004	-3.13	-10.93	-2.82	-32.23	-34.97	-1.3	-18.66	32.11	-18.6	8.99	-5.91	-7.35	10.25	1.17
22.03	-1.61	-4.767	-0.271	-3.282	-3.106	-0.661	-3.293	-2.121	-3.157	1.338	-1.672	-1.496	0.949	-1.684	-0.511	4.495	1.485	1.661	4.106	1.474	2.646	-3.011	-2.834	-0.39	-3.022	-1.85	0.176	2.621	-0.011	1.161	2.445	-0.187	0.985	-2.632	-1.46	1.172	-6.3	-18.67	-1.06	-11.04	-12.17	-2.59	-12.9	-5.38	-12.37	5.24	-5.63	-5.86	3.72
22.71	-2.835	-0.422	-1.68	0.743	1.39	-2.397	2.481	-0.944	2.413	1.155	3.577	4.224	0.438	5.315	1.89	-1.258	1.165	1.812	-1.975	2.902	-0.522	2.423	3.07	-0.717	4.161	0.736	0.647	-3.139	1.738	-1.687	-3.786	1.091	-2.334	4.877	1.452	-3.425	-5.54	-0.91	-2.8	1.61	3.01	-5.18	5.37	-1.6	4.72	1.81	6.99	8.26	0.86
21.42	0.783	1.209	-0.934	1.154	0.687	-0.112	2.582	-0.108	0.427	-1.716	0.371	-0.096	-0.895	1.799	-0.891	-2.143	-0.056	-0.523	-1.322	1.372	-1.317	2.087	1.62	0.821	3.515	0.826	-0.467	-1.266	1.428	-1.262	-0.799	1.895	-0.795	2.694	0.004	-2.69	3.1	4.79	-3.7	4.57	2.72	-0.44	10.11	-0.43	2.19	-8.83	1.91	-0.49	-4.6
20.73	2.121	1.924	-0.271	0.99	-0.519	0.551	-0.288	0.555	-0.196	-2.391	-1.13	-2.639	-1.57	-2.409	-1.566	-2.195	-0.934	-2.443	-1.374	-2.212	-1.37	1.261	-0.248	0.821	-0.017	0.826	-1.509	-0.44	-1.278	-0.436	1.069	0.231	1.074	-0.839	0.004	0.843	37.38	34.23	-4.82	17.41	-6.08	9.79	-5.13	9.87	-3.46	-42.16	-19.69	-30.78	-27.68
21.9	3.288	6.04	0.815	3.142	1.502	0.551	-0.288	0.555	2.752	-2.473	-0.146	-1.786	-2.738	-3.576	-2.733	-5.225	-2.898	-4.538	-5.489	-6.328	-5.485	2.328	0.688	-0.264	-1.103	-0.26	-1.64	-2.592	-3.431	-2.588	-0.952	-1.79	-0.947	-0.839	0.004	0.843	23.06	64.21	3.93	21.71	15.97	5.85	-3.06	5.9	19.3	-10.61	-0.81	-12.52	-19.2
20.79	-0.265	0.964	-0.271	1.476	0.944	0.551	1.608	0.555	1.229	-0.006	1.741	1.21	0.816	1.873	0.82	-1.235	0.511	-0.02	-0.414	0.644	-0.409	1.746	1.215	0.821	1.879	0.826	-0.531	-0.925	0.132	-0.921	-0.394	0.664	-0.39	1.058	0.004	-1.053	-1.21	4.38	-1.23	6.71	3.74	2.5	7.14	2.52	5.59	-0.03	7.91	4.79	3.71
20.67	-0.568	0.39	0.607	0.193	1.262	0.551	1.502	0.555	0.958	1.176	0.761	1.83	1.119	2.07	1.123	0.218	-0.196	0.873	0.161	1.112	0.165	-0.414	0.655	-0.057	0.894	-0.053	1.069	0.357	1.308	0.361	-0.712	0.239	-0.708	0.951	0.004	-0.947	-5.06	3.48	6.46	2.06	13.42	5.85	15.96	5.9	7.51	10.48	6.79	16.32	9.97
21.31	2.275	4.614	-0.271	0.161	0.711	0.551	1.654	0.555	2.339	-2.546	-2.114	-1.564	-1.725	-0.622	-1.72	-4.885	-4.453	-3.903	-4.064	-2.961	-4.06	0.432	0.982	0.821	1.925	0.826	0.549	0.389	1.492	0.393	-0.16	0.943	-0.156	1.103	0.004	-1.099	22.03	37.77	-2.88	1.01	7.06	5.85	17.58	5.9	18.08	-24.65	-12.73	-14.31	-16.7
20.66	1.124	3.975	-0.271	-0.437	-0.779	0.551	-0.288	0.555	2.851	-1.395	-1.561	-1.903	-0.574	-1.412	-0.57	-4.246	-4.412	-4.754	-3.425	-4.263	-3.421	-0.166	-0.508	0.821	-0.017	0.826	-0.342	0.988	0.149	0.992	1.329	0.491	1.333	-0.839	0.004	0.843	13.67	95.96	-6.54	-10.55	-18.8	12.85	-6.96	13.39	34.67	-16.96	-18.98	-23.14	-6.91
19.18	1.395	0	5.01	2.183	0	5.865	0	0.069	-1.395	3.614	0.788	-1.395	4.47	-1.395	-1.326	5.01	2.183	0	5.865	0	0.069	-2.826	-5.01	0.855	-5.01	-4.94	-2.183	3.682	-2.183	-2.114	5.865	0	0.069	-5.865	-5.796	0.069	7.73	0	68.69	9.77	0	82.17	0	1.15	-7.73	19.54	2.81	-7.73	24.25
18.73	-1.323	-1.948	2.082	-1.309	-1.33	-1.214	-1.315	-1.202	-0.625	3.405	0.015	-0.007	0.109	0.008	0.121	4.03	0.639	0.618	0.734	0.633	0.746	-3.39	-3.412	-3.296	-3.397	-3.284	-0.021	0.094	-0.006	0.107	0.116	0.015	0.128	-0.101	0.012	0.113	-1.19	-1.76	1.88	-1.18	-1.2	-1.1	-1.19	-1.08	-0.63	3.41	0.01	-0.01	0.11
18.4	-0.034	0.949	-0.013	-0.013	-0.033	0.131	-0.018	0.133	0.982	0.021	0.021	0.001	0.165	0.015	0.167	-0.961	-0.962	-0.982	-0.817	-0.967	-0.816	0	-0.02	0.144	-0.006	0.146	-0.02	0.144	-0.005	0.146	0.164	0.015	0.166	-0.15	0.002	0.151	-0.03	0.94	-0.01	-0.01	-0.03	0.13	-0.02	0.13	0.97	0.02	0.02	0	0.16
20.72	-0.807	1.347	-0.271	-0.437	3.122	1.755	-0.288	0.555	2.154	0.537	0.37	3.93	2.562	0.519	1.362	-1.617	-1.784	1.776	0.408	-1.635	-0.792	-0.166	3.393	2.026	-0.017	0.826	3.559	2.192	0.149	0.992	-1.368	-3.41	-2.568	-2.043	-1.2	0.843	-19.49	26.07	-6.54	-10.55	72.29	13.06	-6.96	13.39	41.71	12.95	8.94	90.98	19.07
22.62	4.582	6.644	2.791	4.27	2.303	0.551	0.378	0.555	2.062	-1.79	-0.311	-2.278	-4.031	-4.204	-4.027	-3.852	-2.374	-4.34	-6.093	-6.266	-6.089	1.479	-0.488	-2.241	-2.413	-2.237	-1.967	-3.72	-3.892	-3.716	-1.753	-1.925	-1.749	-0.172	0.004	0.177	20.48	29.69	12.47	19.08	10.29	2.46	1.33	2.48	9.22	-8	-1.39	-10.18	-18.01
25.58	-0.612	1.513	0.815	0.228	2.077	-0.189	2.671	1.058	2.125	1.427	0.84	2.688	0.423	3.283	1.67	-0.698	-1.285	0.563	-1.702	1.157	-0.455	-0.587	1.261	-1.004	1.855	0.243	1.848	-0.417	2.442	0.83	-2.265	0.594	-1.018	2.86	1.247	-1.613	-7.24	25.71	13.85	3.88	35.28	-1.7	45.38	15.67	25.16	16.9	9.95	31.83	3.34
17.78	0	1.803	0	0	0	0.056	0	0.069	1.803	0	0	0	0.056	0	0.069	-1.803	-1.803	-1.803	-1.747	-1.803	-1.733	0	0	0.056	0	0.069	0	0.056	0	0.069	0.056	0	0.069	-0.056	0.014	0.069	0	0	0	0	0	0	0	0	0	0	0	0	0
21.91	0.708	0.329	1.918	2.155	2.569	-1.355	0.931	-1.328	-0.379	1.21	1.446	1.86	-2.064	0.223	-2.036	1.589	1.825	2.239	-1.684	0.602	-1.657	0.236	0.65	-3.273	-0.987	-3.246	0.414	-3.51	-1.223	-3.483	-3.924	-1.637	-3.897	2.286	0.027	-2.259	2.34	1.09	6.26	7.11	8.48	-3.83	3.07	-3.72	-2.06	6.36	7.84	10.09	-7.93
20.2	-0.564	1.526	-0.271	-0.437	-0.779	0.551	-0.288	0.555	2.09	0.293	0.127	-0.215	1.114	0.276	1.119	-1.797	-1.963	-2.305	-0.976	-1.814	-0.971	-0.166	-0.508	0.821	-0.017	0.826	-0.342	0.988	0.149	0.992	1.329	0.491	1.333	-0.839	0.004	0.843	-9.08	42.39	-7.52	-12.14	-21.63	14.22	-8	15.41	33.67	4.72	2.04	-3.46	17.5
17.7	0	1.071	0	0	0	0.056	0	0.069	1.071	0	0	0	0.056	0	0.069	-1.071	-1.071	-1.071	-1.016	-1.071	-1.002	0	0	0.056	0	0.069	0	0.056	0	0.069	0.056	0	0.069	-0.056	0.014	0.069	0	0	0	0	0	0	0	0	0	0	0	0	0
22.16	4.055	6.323	1.886	3.971	0.818	0.551	-0.288	0.555	2.269	-2.169	-0.084	-3.237	-3.504	-4.343	-3.5	-4.438	-2.353	-5.506	-5.773	-6.612	-5.769	2.085	-1.068	-1.335	-2.174	-1.331	-3.153	-3.42	-4.259	-3.416	-0.267	-1.106	-0.263	-0.839	0.004	0.843	76.75	119.7	35.54	49.12	7.34	10.42	-5.45	10.5	42.95	-40.88	-1.04	-29.06	-66.33
22.13	-0.936	0.085	-1.496	-0.846	1.557	-1.684	2.492	-1.68	1.021	-0.56	0.089	2.493	-0.748	3.427	-0.744	-1.581	-0.932	1.472	-1.769	2.406	-1.765	0.65	3.053	-0.188	3.987	-0.184	2.403	-0.838	3.338	-0.834	-3.241	0.934	-3.237	4.176	0.004	-4.171	-6.81	0.62	-6.12	-6.16	7.9	-12.26	17.14	-12.23	7.9	-2.33	0.69	13.01	-5.79
27.55	0.94	-6.944	-0.177	-0.221	-0.344	-0.06	-2.227	0.103	-7.884	-1.117	-1.161	-1.284	-1	-3.167	-0.837	6.767	6.723	6.6	6.884	4.717	7.047	-0.044	-0.167	0.117	-2.05	0.28	-0.123	0.161	-2.006	0.324	0.284	-1.883	0.447	-2.167	0.163	2.33	7.61	-60.22	-1.53	-1.91	-2.98	-0.52	-17.28	0.9	-63.82	-9.04	-9.4	-10.39	-8.09
26.27	-0.634	-2.471	-1.457	-1.327	-0.307	-0.945	0.577	-0.903	-1.836	-0.822	-0.692	0.327	-0.31	1.212	-0.268	1.014	1.144	2.163	1.526	3.048	1.568	0.13	1.149	0.512	2.034	0.554	1.019	0.382	1.904	0.424	-0.637	0.885	-0.595	1.522	0.042	-1.48	-3.98	-13.05	-7.36	-8.32	-1.93	-5.63	3.62	-4.47	-9.7	-4.15	-4.34	2.05	-1.85
19.31	-1.712	-2.894	-1.784	-1.34	-3.389	-3.225	-3.375	-3.223	-1.182	-0.073	0.372	-1.678	-1.513	-1.663	-1.512	1.109	1.554	-0.495	-0.331	-0.481	-0.329	0.445	-1.605	-1.441	-1.59	-1.439	-2.049	-1.885	-2.035	-1.883	0.164	0.015	0.166	-0.15	0.002	0.151	-1.74	-2.94	-1.81	-1.36	-3.44	-3.28	-3.43	-3.27	-1.2	-0.07	0.38	-1.7	-1.54
19.91	-0.451	-0.007	-0.182	-0.258	1.058	0.369	2	0.346	0.444	0.27	0.193	1.51	0.82	2.451	0.797	-0.175	-0.251	1.065	0.376	2.007	0.353	-0.076	1.24	0.551	2.182	0.528	1.316	0.627	2.258	0.604	-0.689	0.942	-0.712	1.631	-0.023	-1.654	-0.69	-0.01	-0.28	-0.4	1.63	0.57	3.08	0.53	0.68	0.41	0.3	2.32	1.26
17.94	-0.563	-1.892	-1.892	-1.892	-1.892	-1.836	-1.892	-1.822	-1.329	-1.329	-1.329	-1.329	-1.273	-1.329	-1.259	0	0	0	0.056	0	0.069	0	0	0.056	0	0.069	0	0.056	0	0.069	0.056	0	0.069	-0.056	0.014	0.069	0	0	0	0	0	0	0	0	0	0	0	0	0
17.81	0	2.075	0	0	0	0.056	0	0.069	2.075	0	0	0	0.056	0	0.069	-2.075	-2.075	-2.075	-2.02	-2.075	-2.006	0	0	0.056	0	0.069	0	0.056	0	0.069	0.056	0	0.069	-0.056	0.014	0.069	0	0	0	0	0	0	0	0	0	0	0	0	0
19.8	-0.451	0.114	-0.182	0.378	0.724	0.369	0.557	0.346	0.565	0.27	0.829	1.175	0.82	1.009	0.797	-0.296	0.264	0.61	0.255	0.443	0.232	0.559	0.905	0.551	0.739	0.528	0.346	-0.008	0.18	-0.032	-0.355	-0.166	-0.378	0.188	-0.023	-0.211	-0.51	0.13	-0.21	0.43	0.83	0.42	0.64	0.39	0.64	0.31	0.95	1.34	0.94
24.95	-0.821	-1.294	0.241	-0.649	0.094	0.022	0.097	0.16	-0.472	1.063	0.172	0.916	0.844	0.918	0.982	1.535	0.645	1.388	1.316	1.391	1.454	-0.89	-0.147	-0.219	-0.144	-0.081	0.743	0.671	0.746	0.809	-0.072	0.003	0.066	0.075	0.138	0.064	-3.41	-5.37	0.92	-2.7	0.39	0.09	0.4	0.67	-1.96	4.05	0.72	3.8	3.5
20.28	-0.807	-0.68	-0.271	2.679	-0.779	0.551	-0.288	0.555	0.127	0.537	3.486	0.029	1.358	0.519	1.362	0.409	3.359	-0.098	1.231	0.392	1.235	2.949	-0.508	0.821	-0.017	0.826	-3.457	-2.128	-2.967	-2.124	1.329	0.491	1.333	-0.839	0.004	0.843	-19.49	-7.38	-6.54	27.2	-18.8	12.85	-6.96	13.39	1.38	12.95	35.4	0.69	31.69
26.55	-1.684	-1.987	1.325	-0.043	3.606	0.74	3.123	1.834	-0.304	3.009	1.64	5.29	2.424	4.807	3.518	3.312	1.944	5.594	2.728	5.111	3.822	-1.368	2.281	-0.584	1.798	0.51	3.65	0.784	3.167	1.878	-2.866	-0.483	-1.772	2.383	1.094	-1.289	-6.74	-11.4	7.6	-0.25	20.69	3.04	17.92	10.52	-1.26	12.48	6.81	21.95	8.21
19.34	2.481	0	0	2.785	4.47	0.056	6.089	0.069	-2.481	-2.481	0.303	1.988	-2.426	3.608	-2.412	0	2.785	4.47	0.056	6.089	0.069	2.785	4.47	0.056	6.089	0.069	1.685	-2.729	3.305	-2.715	-4.414	1.619	-4.4	6.034	0.014	-6.02	41.02	0	0	46.04	73.9	0.92	100.67	1.15	-41.02	-41.02	5.01	32.87	-40.1
20.37	-0.036	0.502	-0.271	-0.437	0.622	0.551	0.299	0.555	0.537	-0.235	-0.401	0.658	0.586	0.335	0.59	-0.773	-0.939	0.121	0.049	-0.203	0.053	-0.166	0.893	0.821	0.57	0.826	1.059	0.988	0.736	0.992	-0.072	-0.323	-0.068	-0.251	0.004	0.256	-0.38	3.86	-2.88	-4.65	6.62	5.85	1.94	5.9	4.14	-2.5	-4.27	7	6.23
19.12	-0.418	0.788	-0.169	-0.245	-0.093	0.293	1.691	0.282	1.206	0.248	0.172	0.324	0.711	2.108	0.7	-0.957	-1.033	-0.882	-0.495	0.902	-0.506	-0.076	0.076	0.462	1.86	0.451	0.152	0.539	1.936	0.528	0.387	1.784	0.376	1.397	-0.011	-1.408	-0.24	0.44	-0.1	-0.14	-0.05	0.17	0.9	0.16	0.68	0.14	0.1	0.18	0.4
20.89	-0.444	0.855	1.704	1.305	0.545	0.551	1.378	0.555	1.3	2.148	1.749	0.99	0.995	1.822	0.999	0.848	0.45	-0.31	-0.305	0.523	-0.301	-0.399	-1.158	-1.153	-0.325	-1.149	-0.759	-0.754	0.073	-0.75	0.005	0.833	0.009	0.828	0.004	-0.824	-3.6	6.56	19.71	15.1	2.54	6.37	15.95	6.42	8.27	17.43	14.19	4.27	8.07
19.62	-0.424	-0.077	-0.121	-0.211	0.758	0.333	-0.144	0.36	0.346	0.303	0.213	1.181	0.756	0.279	0.783	-0.043	-0.134	0.835	0.41	-0.067	0.437	-0.09	0.878	0.453	-0.024	0.481	0.968	0.543	0.066	0.571	-0.425	-0.902	-0.398	-0.477	0.027	0.504	-0.6	-0.11	-0.17	-0.3	1.06	0.47	-0.2	0.51	0.49	0.43	0.3	1.66	1.06
20.51	-1.037	0.349	-1.005	1.01	-1.513	-0.184	-1.022	-0.18	1.386	0.032	2.048	-0.476	0.854	0.015	0.858	-1.354	0.662	-1.861	-0.532	-1.371	-0.528	2.015	-0.508	0.821	-0.017	0.826	-2.523	-1.194	-2.033	-1.19	1.329	0.491	1.333	-0.839	0.004	0.843	-5.1	1.86	-5.95	3.85	-8.95	-1.09	-6.05	-1.06	8.25	0.22	8.22	-3.23	5.8
19.35	-0.418	-1.144	0.281	-0.245	1.779	0.293	3.332	0.282	-0.727	0.698	0.172	2.197	0.711	3.75	0.7	1.425	0.899	2.924	1.438	4.477	1.427	-0.526	1.499	0.013	3.052	0.002	2.024	0.539	3.578	0.528	-1.486	1.553	-1.497	3.039	-0.011	-3.05	-0.23	-0.63	0.16	-0.14	0.99	0.16	1.85	0.16	-0.4	0.39	0.1	1.22	0.39
19.97	-0.807	-0.88	-0.271	-0.437	-0.217	0.551	-0.288	0.555	-0.073	0.537	0.37	0.591	1.358	0.519	1.362	0.609	0.443	0.663	1.431	0.592	1.435	-0.166	0.054	0.821	-0.017	0.826	0.22	0.988	0.149	0.992	0.767	-0.072	0.771	-0.839	0.004	0.843	-19.49	-19.38	-6.54	-10.55	-5.07	12.85	-6.96	13.39	-1.6	12.95	8.94	13.84	31.69
20.22	0.178	0.245	0.075	-0.113	-0.779	0.551	-0.288	0.555	0.067	-0.103	-0.29	-0.956	0.373	-0.466	0.377	-0.17	-0.357	-1.023	0.306	-0.533	0.31	-0.188	-0.854	0.475	-0.363	0.48	-0.666	0.663	-0.176	0.667	1.329	0.491	1.333	-0.839	0.004	0.843	4.29	5.18	1.01	-1.54	-18.8	12.85	-6.96	13.39	1.41	-1.39	-3.96	-23.09	8.7
25.2	3.155	4.259	1.41	3.226	1.608	-0.06	0.348	-0.298	1.104	-1.744	0.071	-1.547	-3.215	-2.807	-3.453	-2.848	-1.033	-2.651	-4.319	-3.911	-4.557	1.815	0.198	-1.471	-1.063	-1.709	-1.618	-3.286	-2.878	-3.524	-1.668	-1.261	-1.906	0.408	-0.238	-0.646	15.9	21.47	7.01	16.26	8.11	-0.3	1.75	-1.5	5.56	-8.67	0.36	-7.8	-16.15
23.05	1.399	-5.392	-0.503	1.077	-0.502	0.968	-2.026	2.924	-6.791	-1.903	-0.322	-1.901	-0.431	-3.425	1.525	4.888	6.469	4.89	6.36	3.366	8.316	1.58	0.001	1.471	-1.523	3.427	-1.579	-0.109	-3.103	1.847	1.47	-1.524	3.426	-2.994	1.956	4.95	3.3	-12.71	-1.19	2.38	-1.18	2.28	-4.78	6.89	-16.01	-4.49	-0.71	-4.48	-1.02
21.43	-1.206	-2.868	1.505	-1.116	-1.919	-1.608	0.753	-1.604	-1.662	2.711	0.089	-0.713	-0.403	1.959	-0.399	4.373	1.752	0.949	1.26	3.621	1.264	-2.622	-3.424	-3.114	-0.752	-3.11	-0.803	-0.492	1.869	-0.488	0.311	2.672	0.315	2.361	0.004	-2.357	-9.83	-23.75	12.47	-8.24	-15.89	-13.32	6.24	-13.29	-15.88	25.9	0.74	-6.82	-3.85
20.71	-1.839	-1.152	-0.699	-2.675	-3.016	-1.687	-2.526	-1.683	0.687	1.14	-0.835	-1.177	0.153	-0.686	0.157	0.453	-1.522	-1.864	-0.534	-1.373	-0.53	-1.976	-2.317	-0.988	-1.827	-0.984	-0.342	0.988	0.149	0.992	1.329	0.491	1.333	-0.839	0.004	0.843	-18.25	-12.25	-5.69	-28.43	-32.07	-17.93	-26.85	-17.89	6.82	8.9	-8.29	-11.67	1.51
21.75	-1.149	-3.927	-1.123	-2.002	2.814	-1.432	3.353	-0.165	-2.778	0.026	-0.853	3.963	-0.283	4.502	0.983	2.804	1.925	6.741	2.495	7.28	3.761	-0.879	3.937	-0.309	4.476	0.957	4.816	0.57	5.355	1.836	-4.245	0.539	-2.979	4.784	1.266	-3.518	-3.25	-11.11	-2.43	-5.66	7.96	-4.05	9.49	-0.35	-7.86	0.06	-2.41	11.21	-0.8
22.82	-0.586	0.552	0.15	-1.128	0.816	-0.613	2.475	-0.251	1.138	0.736	-0.542	1.402	-0.027	3.061	0.334	-0.402	-1.68	0.264	-1.165	1.923	-0.804	-1.278	0.666	-0.763	2.325	-0.401	1.944	0.515	3.603	0.876	-1.429	1.659	-1.067	3.088	0.362	-2.727	-2.09	1.97	0.48	-4.03	2.92	-1.44	8.85	-0.55	4.07	2.34	-1.94	5.01	-0.06
21.96	2.084	3.667	0.44	3.003	1.699	-0.176	-1.015	-0.172	1.583	-1.644	0.92	-0.385	-2.26	-3.098	-2.256	-3.227	-0.664	-1.968	-3.843	-4.682	-3.839	2.564	1.259	-0.616	-1.454	-0.612	-1.305	-3.179	-4.018	-3.175	-1.875	-2.714	-1.871	-0.839	0.004	0.843	9.3	13.9	1.29	13.4	6.8	-0.79	-4.53	-0.77	7.68	-5.51	6.04	-2.05	-14.85
18.87	-0.39	0.341	-0.102	0.094	-0.365	0.313	-0.119	0.342	0.731	0.288	0.484	0.025	0.703	0.271	0.732	-0.443	-0.247	-0.706	-0.028	-0.46	0.001	0.196	-0.263	0.414	-0.017	0.444	-0.459	0.219	-0.213	0.248	0.678	0.246	0.707	-0.432	0.029	0.461	-0.23	0.2	-0.06	0.05	-0.21	0.18	-0.07	0.2	0.42	0.17	0.28	0.01	0.41
22.37	0.842	1.235	-0.622	-2.358	1.21	-1.994	0.602	-1.99	0.393	-1.464	-3.2	0.368	-2.836	-0.24	-2.832	-1.857	-3.593	-0.025	-3.229	-0.633	-3.224	-1.736	1.832	-1.372	1.224	-1.367	3.568	0.364	2.96	0.369	-3.204	-0.608	-3.2	2.595	0.004	-2.591	3.25	4.42	-2.4	-7.83	4.66	-7.68	2.32	-7.67	1.47	-5.95	-11.05	1.49	-11.52
22.31	-0.507	-0.093	-0.352	1.53	2.319	-1.04	2.537	0.527	0.415	0.155	2.037	2.826	-0.533	3.044	1.034	-0.259	1.623	2.412	-0.947	2.629	0.619	1.882	2.671	-0.688	2.889	0.879	0.789	-2.57	1.006	-1.003	-3.359	0.217	-1.792	3.577	1.567	-2.01	-4.67	-0.85	-3.24	7.86	21.36	-9.58	23.37	2.03	3.82	1.43	10.46	26.03	-4.91
21.63	-1.657	-4.569	-1.324	-1.761	-4.121	-3.268	-4.107	-0.389	-2.912	0.333	-0.104	-2.464	-1.611	-2.45	1.268	3.245	2.808	0.448	1.301	0.462	4.18	-0.437	-2.797	-1.944	-2.783	0.935	-2.36	-1.507	-2.346	1.372	0.853	0.015	3.732	-0.839	2.879	3.718	-17.45	-48.13	-10.51	-18.55	-28.95	-34.42	-43.26	-2.25	-30.67	2.64	-1.09	-17.31	-16.97
19.73	1.079	1.293	-0.031	-0.032	-0.073	0.151	4.129	0.151	0.214	-1.111	-1.111	-1.153	-0.928	3.049	-0.928	-1.325	-1.325	-1.366	-1.142	2.835	-1.142	0	-0.042	0.183	4.16	0.183	-0.041	0.183	4.161	0.183	0.224	4.202	0.224	3.977	0	-3.977	51.21	101.38	-5.22	-5.3	-12.14	25.08	94.92	25.06	8.95	-52.71	-52.73	-54.69	-44.04
20.68	-0.018	1.375	1.604	-0.437	-0.779	0.551	1.778	0.555	1.393	1.622	-0.419	-0.761	0.568	1.796	0.572	0.229	-1.812	-2.154	-0.825	0.403	-0.82	-2.041	-2.383	-1.053	0.174	-1.049	-0.342	0.988	2.215	0.992	1.329	2.557	1.333	1.227	0.004	-1.223	-0.19	11.78	6.18	-4.65	-8.28	5.85	15.36	5.9	11.85	6.24	-4.41	-8	5.98
23.26	2.437	1.288	-1.059	2.4	2.523	-0.487	1.984	-1.719	-1.149	-3.496	-0.037	0.086	-2.924	-0.453	-4.156	-2.348	1.112	1.235	-1.775	0.696	-3.007	3.459	3.582	0.573	3.044	-0.659	0.123	-2.887	-0.416	-4.119	-3.01	-0.538	-4.241	2.471	-1.232	-3.703	27.99	14.8	-4.76	21.36	28.98	-2.41	22.79	-19.74	-13.2	-15.7	-0.33	0.99	-14.46
24.67	-0.686	1.157	-0.308	0.592	0.936	-1.796	-2.842	-0.034	1.843	0.378	1.278	1.622	-1.11	-2.156	0.653	-1.465	-0.565	-0.221	-2.953	-3.999	-1.19	0.9	1.245	-1.487	-2.534	0.275	0.344	-2.388	-3.434	-0.625	-2.732	-3.778	-0.97	-1.047	1.762	2.809	-2.26	3.8	-0.76	1.95	3.08	-3.21	-5.23	-0.08	6.06	0.93	4.2	5.34	-1.98
22.59	-0.838	-2.563	-0.848	-1.721	-3.615	-0.558	-4.812	-3.969	-1.725	-0.01	-0.884	-2.777	0.28	-3.974	-3.132	1.715	0.842	-1.052	2.005	-2.249	-1.406	-0.874	-2.767	0.29	-3.964	-3.121	-1.894	1.164	-3.091	-2.248	3.057	-1.197	-0.354	-4.254	-3.412	0.843	-4.39	-13.42	-3.71	-8.81	-16.77	-2.72	-25.19	-20.78	-9.03	-0.04	-4.52	-12.89	1.37
19.96	0.666	3.187	-0.325	-1.289	-1.33	-1.106	-1.3	-1.106	2.521	-0.991	-1.955	-1.996	-1.772	-1.967	-1.772	-3.512	-4.476	-4.517	-4.292	-4.487	-4.292	-0.963	-1.005	-0.78	-0.975	-0.78	-0.041	0.183	-0.012	0.183	0.224	0.03	0.224	-0.195	0	0.195	10.67	39.13	-4.11	-21.53	-22.22	-18.47	-21.72	-18.47	43.13	-17.93	-102.05	-104.2	-92.49
23.78	-0.99	-1.78	-0.546	-2.78	-4.338	-1.765	-4.83	-1.531	-0.789	0.444	-1.79	-3.348	-0.775	-3.84	-0.54	1.234	-1	-2.558	0.014	-3.051	0.249	-2.234	-3.792	-1.219	-4.284	-0.985	-1.558	1.014	-2.051	1.249	2.573	-0.492	2.807	-3.065	0.235	3.3	-3.52	-6.33	-1.88	-9.88	-15.42	-6.28	-12.33	-5.44	-2.81	1.53	-6.36	-11.9	-2.76
19.61	-0.451	0.928	-0.182	-0.258	-0.446	0.369	-0.187	0.346	1.379	0.27	0.193	0.005	0.82	0.264	0.797	-1.11	-1.186	-1.375	-0.559	-1.116	-0.582	-0.076	-0.265	0.551	-0.006	0.528	-0.188	0.627	0.071	0.604	0.815	0.259	0.792	-0.556	-0.023	0.533	-0.69	1.43	-0.28	-0.4	-0.69	0.57	-0.29	0.53	2.12	0.41	0.3	0.01	1.26
27.75	-1.591	-1.702	-0.416	-2.99	-2.502	-1.726	-3.19	-1.52	-0.111	1.175	-1.399	-0.911	-0.135	-1.599	0.071	1.286	-1.288	-0.8	-0.024	-1.488	0.182	-2.574	-2.086	-1.31	-2.774	-1.104	0.488	1.264	-0.2	1.47	0.776	-0.688	0.982	-1.464	0.206	1.67	-14.96	-16.3	-4.25	-30.59	-25.59	-17.66	-32.63	-15.55	-0.99	11.05	-13.15	-8.56	-1.27
18.75	-0.034	-0.658	2.908	1.872	-0.04	0.076	-0.025	0.088	-0.625	2.942	1.906	-0.007	0.109	0.008	0.121	3.566	2.531	0.618	0.734	0.633	0.746	-1.036	-2.948	-2.832	-2.933	-2.82	-1.913	-1.797	-1.898	-1.785	0.116	0.015	0.128	-0.101	0.012	0.113	-0.03	-0.67	2.95	1.9	-0.04	0.08	-0.03	0.09	-0.63	2.98	1.93	-0.01	0.11
24.41	-1.393	-0.975	-0.728	-2.272	-3.71	-1.071	-4.084	-1.205	0.418	0.665	-0.879	-2.318	0.322	-2.691	0.188	0.247	-1.297	-2.736	-0.096	-3.109	-0.23	-1.544	-2.982	-0.343	-3.356	-0.477	-1.439	1.201	-1.812	1.067	2.64	-0.373	2.505	-3.013	-0.135	2.879	-11.59	-8.21	-5.1	-19.13	-31.25	-7.56	-21.08	-10.15	3.48	4.62	-7.32	-19.29	2.26
17.83	0	0.706	0	1.574	0	0.056	0	0.069	0.706	0	1.574	0	0.056	0	0.069	-0.706	0.868	-0.706	-0.65	-0.706	-0.636	1.574	0	0.056	0	0.069	-1.574	-1.518	-1.574	-1.504	0.056	0	0.069	-0.056	0.014	0.069	0	0	0	0	0	0	0	0	0	0	0	0	0
18.44	0	1.647	0	0	1.611	0.056	4.454	0.069	1.647	0	0	1.611	0.056	4.454	0.069	-1.647	-1.647	-0.037	-1.592	2.806	-1.578	0	1.611	0.056	4.454	0.069	1.611	0.056	4.454	0.069	-1.555	2.843	-1.541	4.398	0.014	-4.384	0	0	0	0	0	0	2143.16	0	0	0	0	0	0
24.69	-1.963	-4.263	0.592	0.547	3.114	1.101	4.165	1.857	-2.3	2.556	2.511	5.078	3.064	6.129	3.82	4.856	4.811	7.377	5.364	8.428	6.12	-0.045	2.522	0.509	3.573	1.264	2.567	0.554	3.618	1.309	-2.013	1.051	-1.258	3.064	0.756	-2.309	-9.68	-19.88	2.92	2.7	15.35	4.93	20.53	9.15	-10.73	12.6	12.37	25.02	13.72
21.09	1.968	3.139	0.747	0.748	0.896	0.551	-0.288	0.555	1.171	-1.222	-1.22	-1.072	-1.418	-2.257	-1.414	-2.393	-2.391	-2.243	-2.589	-3.427	-2.584	0.002	0.15	-0.196	-1.035	-0.192	0.148	-0.198	-1.036	-0.194	-0.346	-1.184	-0.341	-0.839	0.004	0.843	18.64	43.43	10.33	5.13	8.93	7.62	-3.99	7.67	11.09	-11.57	-7.4	-8.48	-13.43
17.8	1.957	0	0	0	0	0.056	0	0.069	-1.957	-1.957	-1.957	-1.957	-1.902	-1.957	-1.888	0	0	0	0.056	0	0.069	0	0	0.056	0	0.069	0	0.056	0	0.069	0.056	0	0.069	-0.056	0.014	0.069	0	0	0	0	0	0	0	0	0	0	0	0	0
19.16	-0.067	0.742	-0.031	-0.032	0.661	0.151	-0.044	0.151	0.809	0.036	0.035	0.728	0.219	0.024	0.219	-0.773	-0.774	-0.081	-0.591	-0.786	-0.591	0	0.692	0.183	-0.012	0.183	0.693	0.183	-0.012	0.183	-0.509	-0.704	-0.51	-0.195	0	0.195	-11.66	27.14	-5.44	-5.52	16.22	26.16	-7.54	26.14	29.61	6.22	6.13	17.87	37.82
20.8	1.112	1.681	-0.271	2.039	0.306	0.551	-0.288	0.555	0.569	-1.383	0.927	-0.806	-0.562	-1.401	-0.558	-1.952	0.358	-1.375	-1.131	-1.97	-1.127	2.31	0.577	0.821	-0.017	0.826	-1.733	-1.489	-2.327	-1.484	0.244	-0.595	0.248	-0.839	0.004	0.843	19.79	28.09	-4.82	32.93	5.45	9.79	-5.13	9.87	9.51	-24.61	14.96	-14.34	-10
21.65	1.683	4.62	0.154	1.125	2.442	0.551	2.153	0.555	2.937	-1.529	-0.558	0.759	-1.132	0.47	-1.128	-4.466	-3.495	-2.178	-4.07	-2.468	-4.065	0.97	2.288	0.396	1.998	0.4	1.317	-0.574	1.028	-0.57	-1.891	-0.289	-1.887	1.602	0.004	-1.598	3.04	8.35	0.28	2.03	4.42	1	3.35	1	5.31	-2.76	-1.01	1.37	-2.05
21.02	1.814	4.62	0.825	0.378	-0.779	0.551	-0.288	0.555	2.806	-0.989	-1.436	-2.592	-1.263	-2.102	-1.259	-3.795	-4.243	-5.399	-4.07	-4.908	-4.065	-0.447	-1.604	-0.274	-1.113	-0.27	-1.156	0.173	-0.666	0.177	1.329	0.491	1.333	-0.839	0.004	0.843	40.58	96.13	6.15	9.11	-18.8	12.85	-6.96	13.39	55.13	-7.32	-32.14	-58.01	-27.45
19.89	-2.212	-2.841	-2.876	-2.952	-3.14	-2.325	-2.881	-2.348	-0.629	-0.664	-0.74	-0.928	-0.113	-0.669	-0.136	-0.035	-0.112	-0.3	0.516	-0.041	0.492	-0.076	-0.265	0.551	-0.006	0.528	-0.188	0.627	0.071	0.604	0.815	0.259	0.792	-0.556	-0.023	0.533	-4.1	-5.26	-5.33	-5.47	-5.82	-4.2	-5.34	-4.27	-1.16	-1.23	-1.37	-1.72	-0.2
19.68	-0.067	0.813	1.935	-0.032	3.251	0.151	-0.044	0.151	0.881	2.002	0.035	3.318	0.219	0.024	0.219	1.121	-0.845	2.437	-0.662	-0.857	-0.662	-1.966	1.316	-1.783	-1.978	-1.783	3.283	0.183	-0.012	0.183	-3.099	-3.294	-3.099	-0.195	0	0.195	-11.66	32.45	166.42	-5.52	69.82	26.16	-7.54	26.14	35.14	172.22	6.13	71.27	37.82
19.94	0.185	-0.36	-0.121	1.168	0.424	0.333	1.377	0.36	-0.544	-0.305	0.983	0.239	0.148	1.192	0.175	0.239	1.527	0.783	0.692	1.737	0.72	1.288	0.544	0.453	1.498	0.481	-0.744	-0.835	0.209	-0.808	-0.091	0.953	-0.064	1.044	0.027	-1.017	0.51	-0.98	-0.33	3.2	1.16	0.81	3.77	0.87	-1.56	-0.87	2.82	0.69	0.37
18.42	-0.034	1.075	-0.013	-0.013	-0.033	0.131	-0.018	0.133	1.109	0.021	0.021	0.001	0.165	0.015	0.167	-1.088	-1.088	-1.108	-0.944	-1.094	-0.942	0	-0.02	0.144	-0.006	0.146	-0.02	0.144	-0.005	0.146	0.164	0.015	0.166	-0.15	0.002	0.151	-0.03	1.06	-0.01	-0.01	-0.03	0.13	-0.02	0.13	1.09	0.02	0.02	0	0.16
20.61	3.621	9.207	-0.031	1.605	-0.073	0.151	-0.044	0.151	5.586	-3.652	-2.016	-3.694	-3.469	-3.664	-3.469	-9.238	-7.602	-9.28	-9.055	-9.25	-9.055	1.636	-0.042	0.183	-0.012	0.183	-1.678	-1.454	-1.649	-1.454	0.224	0.03	0.224	-0.195	0	0.195	263.82	1526.91	-5.22	25.92	-12.14	25.08	-7.23	25.06	407.04	-266.11	-31.92	-269.15	-252.8
19.12	-0.067	1.05	-0.031	-0.032	-0.073	0.151	-0.044	0.151	1.118	0.036	0.035	-0.006	0.219	0.024	0.219	-1.082	-1.082	-1.124	-0.899	-1.094	-0.899	0	-0.042	0.183	-0.012	0.183	-0.041	0.183	-0.012	0.183	0.224	0.03	0.224	-0.195	0	0.195	-11.66	121.78	-5.44	-5.52	-12.67	26.16	-7.54	26.14	129.6	6.22	6.13	-1.01	37.82
20.94	0.13	0.709	-0.541	-0.245	-0.743	-0.13	1.731	-0.126	0.579	-0.671	-0.375	-0.873	-0.26	1.601	-0.256	-1.25	-0.954	-1.452	-0.84	1.022	-0.836	0.296	-0.202	0.411	2.272	0.415	-0.498	0.114	1.976	0.118	0.612	2.474	0.616	1.861	0.004	-1.857	0.62	3.38	-2.27	-0.88	-3.54	-0.62	8.25	-0.6	4.29	-3.8	-1.66	-6.46	-1.93
20.11	1.26	1.81	0.638	0.883	-0.446	0.369	-0.187	0.346	0.551	-0.622	-0.377	-1.706	-0.891	-1.447	-0.914	-1.173	-0.927	-2.257	-1.441	-1.998	-1.464	0.245	-1.084	-0.269	-0.825	-0.292	-1.329	-0.514	-1.07	-0.537	0.815	0.259	0.792	-0.556	-0.023	0.533	1.91	2.75	0.97	1.34	-0.68	0.56	-0.28	0.53	0.84	-0.95	-0.57	-2.59	-1.35
18.49	-0.034	1.159	-0.019	0.694	-0.04	0.076	-0.025	0.088	1.192	0.015	0.727	-0.007	0.109	0.008	0.121	-1.178	-0.465	-1.199	-1.083	-1.184	-1.071	0.713	-0.021	0.094	-0.006	0.106	-0.734	-0.618	-0.719	-0.606	0.116	0.015	0.128	-0.101	0.012	0.113	-0.03	1.15	-0.02	0.69	-0.04	0.07	-0.03	0.09	1.18	0.01	0.72	-0.01	0.11
22.83	-0.738	-0.511	0.299	-2.728	-4.159	0.18	-4.542	-2.119	0.227	1.037	-1.99	-3.421	0.918	-3.804	-1.381	0.81	-2.217	-3.648	0.691	-4.03	-1.608	-3.027	-4.458	-0.119	-4.841	-2.418	-1.431	2.908	-1.813	0.609	4.339	-0.382	2.04	-4.721	-2.299	2.423	-2.6	-1.8	1.05	-8.59	-14.63	0.63	-15.97	-4.71	0.8	3.65	-6.26	-12.03	3.23
18.38	0.36	0.504	-0.019	-0.019	-0.04	0.076	-0.025	0.088	0.144	-0.379	-0.379	-0.4	-0.284	-0.385	-0.272	-0.523	-0.523	-0.544	-0.429	-0.529	-0.417	0	-0.021	0.094	-0.006	0.106	-0.021	0.094	-0.006	0.107	0.116	0.015	0.128	-0.101	0.012	0.113	0.36	0.5	-0.02	-0.02	-0.04	0.07	-0.03	0.09	0.14	-0.38	-0.38	-0.4	-0.28
20.34	0.122	1.708	-0.271	-0.063	-0.779	0.551	-0.288	0.555	1.586	-0.393	-0.185	-0.901	0.428	-0.41	0.433	-1.979	-1.771	-2.487	-1.158	-1.996	-1.153	0.208	-0.508	0.821	-0.017	0.826	-0.716	0.614	-0.225	0.618	1.329	0.491	1.333	-0.839	0.004	0.843	1.37	24.42	-4.82	-0.64	-13.85	9.79	-5.13	9.87	16.11	-4.41	-1.54	-10.1	4.8
19.1	-0.067	0.875	-0.031	-0.032	-0.073	0.151	-0.044	0.151	0.942	0.036	0.035	-0.006	0.219	0.024	0.219	-0.906	-0.907	-0.948	-0.724	-0.919	-0.724	0	-0.042	0.183	-0.012	0.183	-0.041	0.183	-0.012	0.183	0.224	0.03	0.224	-0.195	0	0.195	-11.66	88.56	-5.44	-5.52	-12.67	26.16	-7.54	26.14	95.38	6.22	6.13	-1.01	37.82
22.54	0.686	-4.342	-0.074	-1.707	-2.317	-2.321	-4.741	-3.898	-5.028	-0.76	-2.394	-3.003	-3.007	-5.427	-4.584	4.268	2.634	2.025	2.021	-0.399	0.444	-1.633	-2.243	-2.247	-4.667	-3.824	-0.61	-0.613	-3.033	-2.191	-0.004	-2.424	-1.581	-2.42	-1.577	0.843	3.77	-19.4	-0.41	-7.56	-12.73	-7.11	-26.04	-21.41	-26.46	-5.5	-12.45	-21.71	-9.89
21.6	-2.419	-4.404	-1.492	-3.029	-2.911	-2.164	-4.434	-3.591	-1.985	0.927	-0.611	-0.492	0.255	-2.015	-1.172	2.913	1.375	1.493	2.241	-0.03	0.813	-1.538	-1.42	-0.672	-2.943	-2.1	0.118	0.866	-1.405	-0.562	0.748	-1.523	-0.68	-2.271	-1.428	0.843	-9.89	-18	-6.1	-12.11	-11.9	-5.36	-18.12	-14.68	-8.11	3.79	-2.44	-2.01	0.63
23.06	-2.168	-4.135	-0.082	-0.425	1.82	1.594	3.549	2.416	-1.967	2.086	1.743	3.988	3.762	5.717	4.584	4.053	3.71	5.955	5.729	7.684	6.551	-0.343	1.902	1.676	3.63	2.498	2.245	2.019	3.974	2.841	-0.226	1.729	0.596	1.954	0.822	-1.133	-20.08	-22.24	-0.7	-3.93	16.86	10.02	32.87	22.38	-10.58	17.97	16.15	36.94	23.64
18.8	1.31	2.16	-0.013	0.995	-0.033	0.131	-0.018	0.133	0.85	-1.323	-0.315	-1.343	-1.179	-1.328	-1.177	-2.172	-1.165	-2.193	-2.028	-2.178	-2.027	1.007	-0.02	0.144	-0.006	0.146	-1.028	-0.863	-1.013	-0.862	0.164	0.015	0.166	-0.15	0.002	0.151	1.29	2.13	-0.01	0.93	-0.03	0.13	-0.02	0.13	0.84	-1.3	-0.29	-1.32	-1.16
18.6	-0.034	-0.656	-0.013	-0.013	1.728	0.131	1.607	0.133	-0.622	0.021	0.021	1.762	0.165	1.641	0.167	0.644	0.643	2.384	0.787	2.263	0.789	0	1.741	0.144	1.62	0.146	1.741	0.144	1.62	0.146	-1.597	-0.121	-1.595	1.476	0.002	-1.474	-0.03	-0.65	-0.01	-0.01	1.7	0.13	1.58	0.13	-0.61	0.02	0.02	1.74	0.16
20.94	3.043	4.555	-0.271	-0.437	-0.779	0.551	-0.288	0.555	1.512	-3.314	-3.48	-3.822	-2.493	-3.331	-2.488	-4.826	-4.992	-5.333	-4.004	-4.843	-4	-0.166	-0.508	0.821	-0.017	0.826	-0.342	0.988	0.149	0.992	1.329	0.491	1.333	-0.839	0.004	0.843	40.11	48.14	-6.54	-10.55	-18.8	12.85	-6.96	13.39	13.26	-43.69	-45.88	-50.38	-32.52
25.89	3.693	4.466	1.398	2.632	-0.267	-0.594	-1.67	0.02	0.772	-2.295	-1.061	-3.96	-4.287	-5.363	-3.674	-3.068	-1.834	-4.732	-5.06	-6.136	-4.446	1.234	-1.665	-1.992	-3.068	-1.378	-2.898	-3.226	-4.302	-2.612	-0.327	-1.403	0.286	-1.076	0.614	1.69	34.15	41.29	12.93	20.04	-2.24	-3.44	-15.44	0.18	7.14	-21.22	-8.08	-33.25	-24.85
18.16	1.031	0	0	0	2.472	0.056	1.745	0.069	-1.031	-1.031	-1.031	1.442	-0.975	0.714	-0.961	0	0	2.472	0.056	1.745	0.069	0	2.472	0.056	1.745	0.069	2.472	0.056	1.745	0.069	-2.417	-0.728	-2.403	1.689	0.014	-1.675	14.27	0	0	0	183.06	2.9	18.63	4.02	-14.27	-14.27	-14.27	19.96	-13.27
23.31	-0.859	-2.403	0.392	-1.774	-2.678	0.011	-1.927	0.011	-1.544	1.251	-0.914	-1.819	0.87	-1.068	0.87	2.795	0.63	-0.275	2.414	0.476	2.414	-2.165	-3.07	-0.381	-2.319	-0.381	-0.904	1.784	-0.154	1.784	2.689	0.751	2.689	-1.938	0	1.938	-2.68	-6.52	1.16	-5.54	-7.86	0.03	-5.88	0.03	-4.19	3.71	-2.85	-5.34	2.72
19.34	-0.067	-1.315	2.392	1.9	-0.073	0.151	-0.044	0.151	-1.247	2.459	1.967	-0.006	0.219	0.024	0.219	3.706	3.214	1.241	1.466	1.271	1.466	-0.492	-2.465	-2.241	-2.435	-2.241	-1.973	-1.748	-1.943	-1.748	0.224	0.03	0.224	-0.195	0	0.195	-16.98	-331.23	88.16	145.34	-18.15	38.1	-10.94	38.08	-314.25	90.64	150.49	-1.45	55.08
17.73	0	1.313	0	0	0	0.056	0	0.069	1.313	0	0	0	0.056	0	0.069	-1.313	-1.313	-1.313	-1.258	-1.313	-1.244	0	0	0.056	0	0.069	0	0.056	0	0.069	0.056	0	0.069	-0.056	0.014	0.069	0	0	0	0	0	0	0	0	0	0	0	0	0
19.59	2.91	-0.277	-0.031	2.623	-0.073	0.151	-0.044	0.151	-3.186	-2.941	-0.287	-2.983	-2.758	-2.953	-2.759	0.245	2.9	0.203	0.428	0.233	0.428	2.654	-0.042	0.183	-0.012	0.183	-2.696	-2.472	-2.667	-2.472	0.224	0.03	0.224	-0.195	0	0.195	156.1	-5.18	-4.39	288.51	-10.23	21.12	-6.09	21.11	-56.8	-157.79	-14.73	-160.03	-147.99
19.22	-0.418	0.942	-0.169	1.398	0.842	0.293	-0.169	0.282	1.36	0.248	1.816	1.259	0.711	0.248	0.7	-1.111	0.456	-0.101	-0.649	-1.111	-0.66	1.567	1.011	0.462	0	0.451	-0.557	-1.105	-1.567	-1.116	-0.548	-1.011	-0.559	-0.462	-0.011	0.451	-0.25	0.57	-0.1	0.84	0.51	0.18	-0.1	0.17	0.82	0.15	1.09	0.76	0.43
20.05	-0.807	-0.042	-0.271	0.021	-0.779	0.551	-0.288	0.555	0.766	0.537	0.829	0.029	1.358	0.519	1.362	-0.229	0.063	-0.737	0.592	-0.247	0.596	0.292	-0.508	0.821	-0.017	0.826	-0.8	0.529	-0.31	0.533	1.329	0.491	1.333	-0.839	0.004	0.843	-25.89	-0.69	-8.68	0.69	-24.96	15.74	-9.24	17.78	12.64	17.2	26.58	0.92	38.82
19.28	-0.062	-0.288	0.181	-0.245	0.714	0.293	2.668	0.282	-0.226	0.242	-0.184	0.775	0.355	2.73	0.344	0.469	0.043	1.002	0.581	2.956	0.57	-0.426	0.533	0.113	2.488	0.102	0.959	0.539	2.914	0.528	-0.42	1.955	-0.431	2.375	-0.011	-2.386	-0.03	-0.15	0.09	-0.13	0.37	0.15	1.4	0.15	-0.12	0.13	-0.1	0.41	0.19
18.89	-0.39	0.829	-0.102	-0.192	-0.365	0.313	-0.119	0.342	1.218	0.288	0.198	0.025	0.703	0.271	0.732	-0.93	-1.02	-1.194	-0.516	-0.948	-0.487	-0.09	-0.263	0.414	-0.017	0.444	-0.173	0.505	0.073	0.534	0.678	0.246	0.707	-0.432	0.029	0.461	-0.23	0.49	-0.06	-0.11	-0.22	0.18	-0.07	0.2	0.72	0.17	0.12	0.01	0.41
21.95	1.384	2.92	1.407	1.704	2.353	2.743	1.641	1.852	1.536	0.024	0.32	0.969	1.359	0.257	0.469	-1.513	-1.216	-0.567	-0.178	-1.279	-1.068	0.296	0.945	1.335	0.234	0.445	0.649	1.039	-0.063	0.148	0.39	-0.712	-0.501	-1.102	-0.89	0.211	2.85	6.3	3.04	3.68	5.08	5.92	3.54	3.23	3.16	0.05	0.66	1.99	2.79
23.61	2.508	4.182	1.045	2.07	1.001	-1.637	2.335	-0.199	1.673	-1.463	-0.438	-1.507	-4.145	-0.174	-2.708	-3.137	-2.112	-3.181	-5.819	-1.847	-4.381	1.025	-0.044	-2.682	1.289	-1.245	-1.069	-3.707	0.264	-2.27	-2.638	1.333	-1.201	3.971	1.437	-2.534	25.25	42.09	9.74	20.83	10.08	-16.47	14.79	-0.86	17.79	-14.28	-4.66	-16.02	-44.07
18.13	0	0	0	0	3.358	0.056	1.553	0.069	0	0	0	3.358	0.056	1.553	0.069	0	0	3.358	0.056	1.553	0.069	0	3.358	0.056	1.553	0.069	3.358	0.056	1.553	0.069	-3.303	-1.805	-3.289	1.498	0.014	-1.484	0	0	0	0	0	0	0	0	0	0	0	0	0
20.3	0.457	1.054	-0.271	-0.106	-0.779	0.551	-0.288	0.555	0.597	-0.728	-0.563	-1.236	0.093	-0.746	0.097	-1.325	-1.16	-1.833	-0.504	-1.342	-0.5	0.165	-0.508	0.821	-0.017	0.826	-0.673	0.656	-0.182	0.661	1.329	0.491	1.333	-0.839	0.004	0.843	8.14	16.85	-4.82	-1.2	-13.85	9.79	-5.13	9.87	9.54	-12.96	-6.36	-21.99	1.66
20.63	-0.61	-0.031	0.766	0.714	1.846	0.551	0.352	0.555	0.579	1.376	1.324	2.455	1.16	0.962	1.164	0.797	0.745	1.877	0.581	0.383	0.586	-0.052	1.08	-0.215	-0.414	-0.211	1.132	-0.163	-0.362	-0.159	-1.295	-1.493	-1.291	-0.198	0.004	0.202	-5.4	-0.3	7.4	6.19	17.83	5.32	2.02	5.36	5.12	12.17	10.68	21.73	10.27
25.1	3.218	4.385	1.63	3.446	1.828	0.16	0.187	-0.078	1.167	-1.588	0.227	-1.39	-3.059	-3.031	-3.297	-2.755	-0.94	-2.557	-4.226	-4.198	-4.464	1.815	0.198	-1.471	-1.443	-1.709	-1.618	-3.286	-3.258	-3.524	-1.668	-1.641	-1.906	0.028	-0.238	-0.266	18.7	25.48	8.93	20.02	10.62	0.88	1.09	-0.46	7.05	-9	1.37	-8.4	-17.55
23.29	4.209	5.537	1.816	3.36	2.08	-0.977	-0.697	-0.973	1.328	-2.393	-0.849	-2.129	-5.187	-4.906	-5.183	-3.721	-2.177	-3.457	-6.515	-6.234	-6.511	1.544	0.264	-2.793	-2.513	-2.789	-1.28	-4.338	-4.057	-4.334	-3.058	-2.777	-3.053	0.281	0.004	-0.276	25.69	33.62	11.08	20.51	12.7	-5.97	-3.3	-5.94	26.53	-50.79	-18.01	-45.18	-110.02
22.84	1.688	4.911	1.622	3.819	1.872	-0.842	-0.705	-0.838	3.222	-0.067	2.13	0.184	-2.53	-2.393	-2.526	-3.289	-1.092	-3.039	-5.753	-5.615	-5.749	2.197	0.25	-2.464	-2.326	-2.459	-1.946	-4.66	-4.523	-4.656	-2.714	-2.577	-2.71	0.137	0.004	-0.133	42.69	117.58	47.86	112.69	55.25	-22.68	-20.8	-24.72	69.64	-1.69	54.19	4.68	-60.07
24.11	-1.782	-3.442	0.117	-0.577	3.554	-0.122	3.395	0.535	-1.66	1.899	1.205	5.336	1.66	5.176	2.317	3.559	2.865	6.996	3.32	6.837	3.977	-0.694	3.437	-0.239	3.278	0.418	4.131	0.455	3.972	1.112	-3.676	-0.159	-3.019	3.516	0.657	-2.859	-29.72	-57.42	1.78	-9.63	37.87	-2.03	32.55	8.93	-27.76	28.93	20.14	56.91	27.76
21.51	-2.375	-3.856	-0.632	-0.779	2.427	-1.017	1.989	2.17	-1.481	1.743	1.596	4.802	1.358	4.364	4.545	3.224	3.077	6.283	2.839	5.845	6.026	-0.147	3.059	-0.385	2.621	2.802	3.206	-0.238	2.768	2.949	-3.444	-0.439	-0.257	3.006	3.187	0.181	-20	-32.47	-2.76	-6.56	20.44	-8.57	9.52	17.91	-15.74	8.04	16.97	51.05	14.44
17.92	3.042	0	0	0	0	0.056	0	0.069	-3.042	-3.042	-3.042	-3.042	-2.987	-3.042	-2.973	0	0	0	0.056	0	0.069	0	0	0.056	0	0.069	0	0.056	0	0.069	0.056	0	0.069	-0.056	0.014	0.069	0	0	0	0	0	0	0	0	0	0	0	0	0
17.72	0	1.275	0	0	0	0.056	0	0.069	1.275	0	0	0	0.056	0	0.069	-1.275	-1.275	-1.275	-1.22	-1.275	-1.206	0	0	0.056	0	0.069	0	0.056	0	0.069	0.056	0	0.069	-0.056	0.014	0.069	0	0	0	0	0	0	0	0	0	0	0	0	0
20.01	-0.451	-1.801	-0.182	-0.258	2.099	0.369	3.654	0.346	-1.349	0.27	0.193	2.55	0.82	4.105	0.797	1.619	1.543	3.9	2.17	5.454	2.147	-0.076	2.281	0.551	3.835	0.528	2.357	0.627	3.912	0.604	-1.73	1.554	-1.753	3.284	-0.023	-3.308	-0.51	-2.05	-0.21	-0.29	2.39	0.42	4.17	0.39	-1.54	0.31	0.22	2.91	0.94
20.93	1.897	2.66	-0.271	1.521	0.175	0.551	-0.288	0.555	0.762	-2.168	-0.376	-1.722	-1.347	-2.185	-1.343	-2.93	-1.139	-2.484	-2.109	-2.948	-2.105	1.792	0.446	0.821	-0.017	0.826	-1.346	-0.97	-1.809	-0.966	0.375	-0.464	0.379	-0.839	0.004	0.843	18.12	31.05	-3.16	10.79	1.36	6.43	-3.36	6.48	7.28	-20.71	-2.46	-12.12	-12.86
21.17	-0.016	0.936	0.431	0.402	2.311	0.551	3.807	0.555	0.952	0.447	0.418	2.327	0.567	3.823	0.571	-0.505	-0.534	1.375	-0.385	2.871	-0.381	-0.029	1.88	0.12	3.376	0.124	1.909	0.149	3.405	0.153	-1.761	1.496	-1.756	3.256	0.004	-3.252	-0.33	19.19	3.79	3.12	47.4	11.29	50.69	11.37	19.52	3.93	3.25	47.73	11.62
19.67	-0.424	-0.608	-0.121	-0.211	0.507	0.333	1.106	0.36	-0.184	0.303	0.213	0.93	0.756	1.53	0.783	0.487	0.397	1.115	0.941	1.714	0.968	-0.09	0.628	0.453	1.227	0.481	0.718	0.543	1.317	0.571	-0.174	0.599	-0.147	0.773	0.027	-0.746	-0.6	-0.85	-0.17	-0.3	0.68	0.47	1.55	0.51	-0.26	0.43	0.3	1.25	1.06
17.78	0	1.764	0	0	0	0.056	0	0.069	1.764	0	0	0	0.056	0	0.069	-1.764	-1.764	-1.764	-1.708	-1.764	-1.695	0	0	0.056	0	0.069	0	0.056	0	0.069	0.056	0	0.069	-0.056	0.014	0.069	0	0	0	0	0	0	0	0	0	0	0	0	0
21.09	-1.267	-0.269	-2.305	-1.284	-1.486	-1.484	-1.515	-0.403	0.998	-1.038	-0.017	-0.219	-0.217	-0.248	0.864	-2.036	-1.015	-1.217	-1.215	-1.246	-0.134	1.021	0.819	0.821	0.79	1.902	-0.202	-0.2	-0.231	0.881	0.002	-0.029	1.083	-0.031	1.081	1.112	-4.8	-1.02	-8.73	-4.86	-5.63	-5.62	-4.56	-1.08	3.78	-3.93	-0.06	-0.83	-0.82
20.32	-0.807	-1.79	-0.271	-0.437	0.604	0.551	2.923	0.555	-0.983	0.537	0.37	1.412	1.358	3.73	1.362	1.519	1.353	2.394	2.34	4.713	2.345	-0.166	0.875	0.821	3.194	0.826	1.041	0.988	3.36	0.992	-0.054	2.318	-0.05	2.372	0.004	-2.368	-14.36	-16.11	-4.82	-7.77	9.32	9.79	44.61	9.87	-8.84	9.55	6.59	21.76	24.16
20.07	-0.429	-0.065	-0.271	-0.192	-0.779	0.551	-0.288	0.555	0.364	0.158	0.237	-0.35	0.979	0.141	0.983	-0.206	-0.127	-0.714	0.615	-0.224	0.619	0.079	-0.508	0.821	-0.017	0.826	-0.587	0.742	-0.096	0.747	1.329	0.491	1.333	-0.839	0.004	0.843	-6.98	-1.15	-4.82	-2.46	-13.85	9.79	-5.13	9.87	5.93	2.57	2.89	-5.69	15.94
18.95	0.716	-1.86	-0.818	-0.908	-1.082	-0.404	-0.835	-0.375	-2.576	-1.534	-1.624	-1.797	-1.119	-1.551	-1.09	1.042	0.952	0.778	1.456	1.025	1.485	-0.09	-0.263	0.414	-0.017	0.444	-0.173	0.505	0.073	0.534	0.678	0.246	0.707	-0.432	0.029	0.461	0.42	-1.1	-0.48	-0.54	-0.64	-0.24	-0.49	-0.22	-1.52	-0.9	-0.96	-1.06	-0.66
20.68	2.063	3.203	-0.271	-0.437	-0.779	0.551	-0.288	0.555	1.14	-2.333	-2.5	-2.841	-1.512	-2.351	-1.508	-3.474	-3.64	-3.981	-2.652	-3.491	-2.648	-0.166	-0.508	0.821	-0.017	0.826	-0.342	0.988	0.149	0.992	1.329	0.491	1.333	-0.839	0.004	0.843	46.11	88.96	-7.52	-12.14	-21.63	14.22	-8	15.41	25.49	-52.16	-55.88	-63.52	-32.21
20.14	-0.226	0.61	-0.271	-0.437	-0.779	0.551	-0.288	0.555	0.837	-0.045	-0.211	-0.552	0.777	-0.062	0.781	-0.881	-1.047	-1.389	-0.06	-0.898	-0.056	-0.166	-0.508	0.821	-0.017	0.826	-0.342	0.988	0.149	0.992	1.329	0.491	1.333	-0.839	0.004	0.843	-6.29	16.95	-7.52	-12.14	-21.63	14.22	-8	15.41	23.24	-1.24	-5.85	-15.34	20.07
20.66	-1.738	-1.034	-0.454	-0.871	-0.68	-0.609	-0.002	-0.605	0.704	1.284	0.867	1.059	1.129	1.736	1.133	0.58	0.163	0.354	0.425	1.032	0.429	-0.417	-0.225	-0.155	0.452	-0.151	0.191	0.262	0.869	0.266	0.071	0.677	0.075	0.607	0.004	-0.602	-13.67	-8.98	-3.94	-7.56	-5.9	-5.29	-0.02	-5.25	5.54	10.1	6.82	8.32	8.88
20.16	0.777	0.442	-0.182	0.878	1.865	0.369	0.591	0.346	-0.335	-0.959	0.1	1.087	-0.408	-0.186	-0.431	-0.624	0.435	1.422	-0.073	0.148	-0.097	1.059	2.046	0.551	0.772	0.528	0.987	-0.509	-0.287	-0.532	-1.496	-1.274	-1.519	0.222	-0.023	-0.245	0.89	0.5	-0.21	1	2.13	0.42	0.67	0.39	-0.38	-1.09	0.11	1.24	-0.47
20.13	-0.368	0.658	-0.271	-0.437	-0.779	0.551	-0.288	0.555	1.027	0.098	-0.069	-0.41	0.919	0.08	0.923	-0.929	-1.096	-1.437	-0.108	-0.947	-0.104	-0.166	-0.508	0.821	-0.017	0.826	-0.342	0.988	0.149	0.992	1.329	0.491	1.333	-0.839	0.004	0.843	-10.23	18.29	-7.52	-12.14	-21.63	14.22	-8	15.41	28.52	2.71	-1.91	-11.39	23.74
18.79	0.739	0.778	-0.019	-0.019	-0.04	0.076	2.936	0.088	0.039	-0.758	-0.758	-0.779	-0.663	2.198	-0.651	-0.796	-0.797	-0.818	-0.702	2.159	-0.69	0	-0.021	0.094	2.955	0.106	-0.021	0.094	2.955	0.107	0.116	2.977	0.128	2.861	0.012	-2.849	0.71	0.75	-0.02	-0.02	-0.04	0.07	2.49	0.08	0.04	-0.73	-0.73	-0.75	-0.64
18.4	-0.034	0.406	-0.013	-0.013	0.505	0.131	-0.018	0.133	0.44	0.021	0.021	0.539	0.165	0.015	0.167	-0.419	-0.419	0.099	-0.275	-0.424	-0.273	0	0.518	0.144	-0.006	0.146	0.518	0.144	-0.005	0.146	-0.374	-0.523	-0.372	-0.15	0.002	0.151	-0.03	0.4	-0.01	-0.01	0.5	0.13	-0.02	0.13	0.43	0.02	0.02	0.53	0.16
20.53	1.04	1.54	-0.271	0.055	0.019	0.551	-0.288	0.555	0.5	-1.311	-0.985	-1.021	-0.489	-1.328	-0.485	-1.811	-1.485	-1.522	-0.99	-1.828	-0.985	0.326	0.29	0.821	-0.017	0.826	-0.036	0.496	-0.343	0.5	0.532	-0.307	0.536	-0.839	0.004	0.843	18.5	27.4	-4.82	0.5	0.31	9.79	-5.13	9.87	8.9	-23.32	-8.93	-17.03	-8.71
19.65	4.322	4.338	1.827	5.253	2.844	0.056	0	0.069	0.016	-2.496	0.931	-1.478	-4.267	-4.322	-4.253	-2.511	0.915	-1.494	-4.282	-4.338	-4.268	3.427	1.017	-1.771	-1.827	-1.757	-2.409	-5.198	-5.253	-5.184	-2.788	-2.844	-2.774	-0.056	0.014	0.069	53.61	53.8	7.66	21.43	35.27	0.69	0	0.86	0.19	-10.47	3.8	-18.34	-52.92
21.53	0.512	1.064	0.025	-0.479	1.17	-0.271	3.105	-0.267	0.552	-0.487	-0.991	0.658	-0.783	2.593	-0.779	-1.04	-1.543	0.105	-1.335	2.041	-1.331	-0.503	1.145	-0.295	3.081	-0.291	1.648	0.208	3.584	0.212	-1.44	1.936	-1.436	3.376	0.004	-3.372	2.36	4.9	0.11	-2.13	5.38	-1.25	14.29	-1.23	4.15	-3.66	-6.87	4.94	-5.88
19.56	-2.014	-3.424	-0.802	-2.819	-2.86	-2.636	-2.831	-2.636	-1.41	1.212	-0.805	-0.846	-0.622	-0.817	-0.622	2.621	0.605	0.564	0.788	0.593	0.788	-2.017	-2.058	-1.833	-2.028	-1.833	-0.041	0.183	-0.012	0.183	0.224	0.03	0.224	-0.195	0	0.195	-38.19	-70.98	-34.72	-135.39	-137.37	-126.59	-135.95	-126.59	-21.51	24.21	-16.42	-17.26	-12.68
24.73	1.156	3.229	0.782	1.036	2.999	0.514	2.269	1.22	2.073	-0.373	-0.12	1.844	-0.642	1.114	0.065	-2.446	-2.193	-0.229	-2.715	-0.96	-2.009	0.253	2.217	-0.268	1.487	0.438	1.964	-0.521	1.234	0.185	-2.485	-0.73	-1.779	1.755	0.706	-1.049	3.01	8.4	2.04	2.69	7.8	1.34	5.9	3.17	5.67	-1.02	-0.33	5.04	-1.76
17.72	0	1.289	0	0	0	0.056	0	0.069	1.289	0	0	0	0.056	0	0.069	-1.289	-1.289	-1.289	-1.233	-1.289	-1.219	0	0	0.056	0	0.069	0	0.056	0	0.069	0.056	0	0.069	-0.056	0.014	0.069	0	0	0	0	0	0	0	0	0	0	0	0	0
18.41	-0.034	1.108	-0.019	-0.019	-0.04	0.076	-0.025	0.088	1.141	0.015	0.015	-0.007	0.109	0.008	0.121	-1.126	-1.127	-1.148	-1.032	-1.133	-1.02	0	-0.021	0.094	-0.006	0.106	-0.021	0.094	-0.006	0.107	0.116	0.015	0.128	-0.101	0.012	0.113	-0.03	1.1	-0.02	-0.02	-0.04	0.07	-0.03	0.09	1.13	0.01	0.01	-0.01	0.11
21.57	-0.41	-0.383	-2.572	-2.738	-0.831	-1.751	2.317	-1.746	0.027	-2.162	-2.329	-0.421	-1.341	2.726	-1.337	-2.189	-2.355	-0.448	-1.368	2.7	-1.364	-0.166	1.741	0.821	4.889	0.826	1.907	0.988	5.055	0.992	-0.92	3.148	-0.915	4.067	0.004	-4.063	-7.23	-6.81	-45.75	-48.71	-10.94	-31.14	36.66	-31.07	0.47	-38.17	-41.1	-5.52	-23.67
19.98	-1.433	-2.529	-3.199	-5.168	-0.291	-5.113	-1.925	-5.099	-1.096	-1.766	-3.735	1.142	-3.679	-0.491	-3.666	-0.671	-2.639	2.237	-2.584	0.604	-2.57	-1.969	2.908	-1.913	1.275	-1.899	4.877	0.056	3.244	0.069	-4.821	-1.633	-4.807	3.188	0.014	-3.174	-14.95	-31.36	-12.95	-64.1	-3.61	-63.41	-6.13	-63.24	-11.43	-7	-38.98	11.91	-38.4
23.24	-1.598	-0.677	-0.169	-0.593	1.032	-1.533	1.76	1.03	0.921	1.428	1.005	2.63	0.065	3.357	2.628	0.507	0.084	1.709	-0.856	2.436	1.707	-0.424	1.202	-1.363	1.929	1.2	1.625	-0.94	2.353	1.623	-2.565	0.727	-0.002	3.292	2.563	-0.729	-15.31	-6.07	-1.62	-3.89	9.89	-7.34	16.86	9.87	8.27	13.69	6.6	25.2	0.31
20.84	2.202	2.192	-0.271	0.407	-0.779	0.551	1.187	0.555	-0.01	-2.473	-1.795	-2.98	-1.651	-1.015	-1.647	-2.462	-1.784	-2.97	-1.641	-1.005	-1.637	0.678	-0.508	0.821	1.458	0.826	-1.186	0.143	0.78	0.147	1.329	1.966	1.333	0.636	0.004	-0.632	12.18	10.8	-2.88	2.26	-8.28	5.85	12.44	5.9	-0.04	-13.68	-7.56	-16.49	-9.13
19.95	-0.067	0.544	1.996	1.521	2.139	0.151	2.217	0.151	0.611	2.063	1.588	2.206	0.219	2.284	0.219	1.452	0.977	1.595	-0.392	1.673	-0.393	-0.475	0.143	-1.844	0.221	-1.845	0.618	-1.369	0.697	-1.369	-1.988	0.078	-1.988	2.066	0	-2.066	-16.98	67.58	502.83	96.24	89.07	38.1	135.44	38.08	75.96	519.81	100.5	91.88	55.08
20.41	0.845	0.057	1.199	1.906	0.42	-1.044	-0.372	-1.044	-0.788	0.354	1.061	-0.425	-1.889	-1.217	-1.889	1.143	1.849	0.363	-1.101	-0.429	-1.101	0.707	-0.779	-2.243	-1.572	-2.243	-1.486	-2.95	-2.278	-2.95	-1.464	-0.792	-1.464	0.672	0	-0.672	3.06	0.21	4.34	6.85	1.52	-3.78	-1.11	-3.78	-5.27	2.37	6.93	-2.84	-12.64
21.46	-1.283	-1.234	-0.852	-0.514	0.243	-0.139	1.79	-1.077	0.049	0.432	0.77	1.527	1.145	3.073	0.207	0.382	0.72	1.477	1.095	3.024	0.157	0.338	1.095	0.713	2.641	-0.225	0.757	0.375	2.304	-0.563	-0.382	1.546	-1.32	1.928	-0.938	-2.867	-6.48	-6.23	-4.3	-2.59	1.23	-0.48	8.58	-5.44	0.25	2.18	3.88	7.71	3.98
20	-0.062	-0.819	-0.121	0.155	1.554	0.333	2.485	0.36	-0.757	-0.059	0.217	1.616	0.395	2.547	0.422	0.698	0.974	2.373	1.152	3.304	1.179	0.276	1.674	0.453	2.606	0.481	1.399	0.178	2.33	0.205	-1.221	0.931	-1.194	2.152	0.027	-2.125	-0.07	-0.98	-0.14	0.18	1.85	0.4	2.96	0.43	-0.9	-0.07	0.26	1.92	0.47
21.08	-0.499	-0.356	-0.415	-0.588	-1.399	-2.737	1.485	-2.737	0.144	0.084	-0.089	-0.899	-2.238	1.985	-2.238	-0.059	-0.233	-1.043	-2.381	1.841	-2.381	-0.174	-0.984	-2.322	1.9	-2.322	-0.81	-2.149	2.074	-2.149	-1.338	2.884	-1.338	4.222	0	-4.222	-4.12	-2.94	-3.42	-4.42	-5.07	-22.59	9.16	-22.59	1.19	0.7	-0.67	-3.26	-18.47
19.87	-0.424	2.864	-0.121	-0.211	-0.406	0.333	0.302	0.36	3.287	0.303	0.213	0.018	0.756	0.725	0.783	-2.984	-3.075	-3.269	-2.531	-2.562	-2.504	-0.09	-0.285	0.453	0.423	0.481	-0.195	0.543	0.513	0.571	0.738	0.707	0.765	-0.031	0.027	0.058	-0.6	4.03	-0.17	-0.3	-0.57	0.47	0.42	0.51	4.62	0.43	0.3	0.03	1.06
20.73	-0.199	0.014	0.979	-0.437	1.548	0.551	2.01	0.555	0.213	1.178	-0.238	1.747	0.75	2.209	0.754	0.965	-0.451	1.534	0.536	1.995	0.54	-1.416	0.569	-0.429	1.03	-0.425	1.985	0.988	2.447	0.992	-0.998	0.461	-0.994	1.459	0.004	-1.455	-2.12	0.15	10.41	-4.65	12.46	5.85	21.36	5.9	2.27	12.53	-2.53	14.06	7.97
23.16	1.684	2.801	4.553	3.802	5.354	4.141	-0.288	4.884	1.117	2.869	2.118	3.67	2.457	-1.972	3.201	1.752	1.001	2.553	1.34	-3.089	2.084	-0.752	0.8	-0.412	-4.841	0.331	1.552	0.339	-4.09	1.083	-1.213	-5.642	-0.469	-4.429	0.744	5.173	7.18	10.2	34.3	24.53	55.35	42.81	-2.98	50.5	3.21	11.41	8.02	15.65	10.48
18.5	-0.034	1.122	-0.013	-0.013	0.67	0.131	-0.018	0.133	1.156	0.021	0.021	0.703	0.165	0.015	0.167	-1.135	-1.135	-0.452	-0.991	-1.14	-0.989	0	0.682	0.144	-0.006	0.146	0.683	0.144	-0.005	0.146	-0.538	-0.688	-0.537	-0.15	0.002	0.151	-0.03	1.11	-0.01	-0.01	0.66	0.13	-0.02	0.13	1.14	0.02	0.02	0.69	0.16
18.55	1.149	1.24	-0.019	-0.019	-0.04	0.076	-0.025	0.088	0.091	-1.167	-1.168	-1.189	-1.073	-1.174	-1.061	-1.259	-1.259	-1.28	-1.165	-1.265	-1.152	0	-0.021	0.094	-0.006	0.106	-0.021	0.094	-0.006	0.107	0.116	0.015	0.128	-0.101	0.012	0.113	1.14	1.23	-0.02	-0.02	-0.04	0.07	-0.03	0.09	0.09	-1.16	-1.16	-1.18	-1.06
20.49	-0.353	-0.192	-0.271	0.129	0.407	0.551	2.018	0.555	0.161	0.082	0.483	0.761	0.904	2.371	0.908	-0.078	0.322	0.6	0.743	2.21	0.747	0.4	0.678	0.821	2.289	0.826	0.278	0.421	1.889	0.425	0.143	1.611	0.147	1.467	0.004	-1.463	-3.76	-1.35	-2.88	0.85	4.33	5.85	20.72	5.9	1.13	0.88	3.19	8.09	9.61
23.15	1.007	3.026	4.211	3.885	5.182	4.141	0.505	4.884	2.019	3.204	2.877	4.175	3.134	-0.502	3.877	1.184	0.858	2.156	1.114	-2.521	1.858	-0.326	0.971	-0.07	-3.706	0.674	1.297	0.256	-3.379	1	-1.041	-4.677	-0.298	-3.636	0.744	4.379	1.47	4.39	8.22	7.58	10.12	8.08	0.96	9.54	2.44	4.68	4.2	6.09	4.57
20.48	0.19	-1.075	1.548	0.286	2.217	0.369	3.036	1.411	-1.264	1.358	0.096	2.027	0.179	2.846	1.221	2.622	1.36	3.291	1.444	4.111	2.485	-1.262	0.669	-1.178	1.489	-0.137	1.931	0.083	2.751	1.125	-1.848	0.82	-0.806	2.667	1.042	-1.625	0.22	-1.23	1.77	0.33	2.53	0.42	3.46	1.43	-1.44	1.55	0.11	2.31	0.2
17.99	0	1.943	0	0	0	0.056	1.76	0.069	1.943	0	0	0	0.056	1.76	0.069	-1.943	-1.943	-1.943	-1.888	-0.183	-1.874	0	0	0.056	1.76	0.069	0	0.056	1.76	0.069	0.056	1.76	0.069	1.704	0.014	-1.69	0	0	0	0	0	0	0	0	0	0	0	0	0
19.17	-0.067	1.533	-0.031	-0.032	-0.073	0.151	-0.044	0.151	1.6	0.036	0.035	-0.006	0.219	0.024	0.219	-1.564	-1.565	-1.606	-1.381	-1.576	-1.381	0	-0.042	0.183	-0.012	0.183	-0.041	0.183	-0.012	0.183	0.224	0.03	0.224	-0.195	0	0.195	-11.66	78.55	-5.44	-5.52	-12.67	26.16	-7.54	26.14	82	6.22	6.13	-1.01	37.82
19.67	-0.424	-0.915	-0.121	-0.211	2.08	0.333	-0.144	0.36	-0.491	0.303	0.213	2.504	0.756	0.279	0.783	0.794	0.704	2.995	1.248	0.771	1.275	-0.09	2.201	0.453	-0.024	0.481	2.291	0.543	0.066	0.571	-1.748	-2.225	-1.72	-0.477	0.027	0.504	-0.61	-1.31	-0.17	-0.3	2.99	0.48	-0.21	0.52	-0.71	0.44	0.31	3.6	1.09
27.74	1.623	2.35	1.583	1.845	2.354	-0.138	2.287	1.461	0.727	-0.04	0.222	0.731	-1.761	0.664	-0.162	-0.767	-0.505	0.005	-2.487	-0.063	-0.889	0.262	0.771	-1.721	0.704	-0.122	0.509	-1.983	0.442	-0.384	-2.492	-0.067	-0.893	2.425	1.598	-0.826	16.64	24.1	16.24	12.9	24.14	-0.85	23.45	14.98	7.45	-0.41	1.55	7.5	-10.84
19.09	-0.067	0.846	-0.031	-0.032	-0.073	0.151	-0.044	0.151	0.914	0.036	0.035	-0.006	0.219	0.024	0.219	-0.878	-0.878	-0.92	-0.695	-0.89	-0.695	0	-0.042	0.183	-0.012	0.183	-0.041	0.183	-0.012	0.183	0.224	0.03	0.224	-0.195	0	0.195	-11.66	70.76	-5.44	-5.52	-12.67	26.16	-7.54	26.14	76.4	6.22	6.13	-1.01	37.82
17.75	0	1.482	0	0	0	0.056	0	0.069	1.482	0	0	0	0.056	0	0.069	-1.482	-1.482	-1.482	-1.426	-1.482	-1.412	0	0	0.056	0	0.069	0	0.056	0	0.069	0.056	0	0.069	-0.056	0.014	0.069	0	0	0	0	0	0	0	0	0	0	0	0	0
19.27	-0.034	1.467	1.083	2.648	-0.033	0.131	3.502	0.133	1.5	1.117	2.682	0.001	0.165	3.536	0.167	-0.383	1.182	-1.5	-1.335	2.036	-1.334	1.565	-1.116	-0.952	2.419	-0.95	-2.681	-2.517	0.854	-2.515	0.164	3.535	0.166	3.371	0.002	-3.369	-0.03	1.49	1.02	2.69	-0.03	0.13	3.56	0.13	1.52	1.05	2.72	0	0.17
27.29	3.201	4.054	1.346	2.406	1.983	-0.102	2.553	1.171	0.854	-1.855	-0.795	-1.218	-3.302	-0.648	-2.03	-2.709	-1.649	-2.072	-4.156	-1.502	-2.883	1.06	0.637	-1.447	1.207	-0.175	-0.423	-2.507	0.147	-1.235	-2.084	0.57	-0.812	2.654	1.273	-1.382	11.69	14.8	4.91	8.78	7.24	-0.37	9.32	4.28	3.12	-6.77	-2.9	-4.45	-11.94
17.72	0	1.288	0	0	0	0.056	0	0.069	1.288	0	0	0	0.056	0	0.069	-1.288	-1.288	-1.288	-1.232	-1.288	-1.218	0	0	0.056	0	0.069	0	0.056	0	0.069	0.056	0	0.069	-0.056	0.014	0.069	0	0	0	0	0	0	0	0	0	0	0	0	0
20.8	-0.97	-0.124	-0.185	-0.176	-1.184	0.152	-2.066	-1.532	0.846	0.784	0.794	-0.214	1.121	-1.096	-0.563	-0.062	-0.052	-1.06	0.275	-1.942	-1.409	0.01	-0.998	0.337	-1.88	-1.347	-1.008	0.327	-1.89	-1.357	1.335	-0.882	-0.349	-2.217	-1.684	0.533	-1.47	-0.19	-0.28	-0.27	-1.61	0.23	-3.14	-2.33	1.29	1.19	1.21	-0.29	1.7
17.8	0	0.803	0	0	1.197	0.056	0	0.069	0.803	0	0	1.197	0.056	0	0.069	-0.803	-0.803	0.395	-0.747	-0.803	-0.733	0	1.197	0.056	0	0.069	1.197	0.056	0	0.069	-1.142	-1.197	-1.128	-0.056	0.014	0.069	0	0	0	0	0	0	0	0	0	0	0	0	0
18.71	-0.034	1.074	0.992	-0.019	-0.04	0.076	1.703	0.088	1.107	1.026	0.015	-0.007	0.109	1.737	0.121	-0.081	-1.093	-1.114	-0.998	0.629	-0.986	-1.011	-1.033	-0.917	0.711	-0.905	-0.021	0.094	1.722	0.107	0.116	1.743	0.128	1.628	0.012	-1.615	-0.03	1.04	0.91	-0.02	-0.04	0.07	1.42	0.08	1.07	0.94	0.01	-0.01	0.11
21.09	-0.455	0.821	0.323	1.059	2.188	0.551	3.237	0.555	1.276	0.778	1.514	2.643	1.005	3.692	1.01	-0.498	0.238	1.367	-0.27	2.416	-0.266	0.737	1.866	0.228	2.914	0.232	1.129	-0.509	2.177	-0.505	-1.638	1.048	-1.634	2.686	0.004	-2.682	-0.89	1.6	0.63	1.66	4.27	1.07	6.31	1.08	2.49	1.52	2.38	5.16	1.96
20.45	0.98	0.767	2.689	1.771	2.758	0.151	3.861	0.151	-0.213	1.709	0.791	1.778	-0.829	2.881	-0.829	1.922	1.003	1.99	-0.616	3.094	-0.616	-0.918	0.069	-2.537	1.172	-2.538	0.987	-1.619	2.09	-1.62	-2.606	1.103	-2.607	3.71	0	-3.71	8.13	5.3	18.46	12.27	22.88	1.25	32.03	1.25	-1.47	11.73	5.48	14.75	-6.87
21.68	1.196	6.077	1.174	1.109	1.771	0.551	1.179	0.555	4.882	-0.022	-0.087	0.576	-0.645	-0.016	-0.641	-4.903	-4.968	-4.306	-5.527	-4.898	-5.523	-0.065	0.597	-0.623	0.005	-0.619	0.662	-0.558	0.07	-0.554	-1.221	-0.592	-1.217	0.629	0.004	-0.625	3.04	15.47	2.23	2.82	3.09	1.4	2.21	1.41	12.43	-0.04	-0.22	1	-1.64
19.26	0.535	1.715	-0.031	-0.032	-0.073	0.151	-0.044	0.151	1.181	-0.566	-0.566	-0.608	-0.383	-0.578	-0.383	-1.747	-1.747	-1.788	-1.564	-1.759	-1.564	0	-0.042	0.183	-0.012	0.183	-0.041	0.183	-0.012	0.183	0.224	0.03	0.224	-0.195	0	0.195	14.19	284.46	-5.22	-5.3	-12.14	25.08	-7.23	25.06	31.34	-15.02	-15.04	-16.13	-10.17
20.46	-0.807	-1.178	0.128	0.852	0.723	0.551	1.755	0.555	-0.37	0.935	1.66	1.53	1.358	2.563	1.362	1.306	2.03	1.901	1.728	2.933	1.732	0.724	0.595	0.423	1.627	0.427	-0.13	-0.302	0.903	-0.298	-0.172	1.032	-0.168	1.205	0.004	-1.201	-14.25	-20.79	1.24	15.05	10.73	9.72	30.98	9.79	-6.54	9.07	29.3	22.72	23.97
24.13	3.078	4.178	4.523	4.654	5.821	4.141	4.332	4.884	1.1	1.445	1.576	2.743	1.063	1.254	1.806	0.346	0.476	1.643	-0.037	0.154	0.707	0.131	1.297	-0.382	-0.191	0.361	1.167	-0.513	-0.322	0.23	-1.68	-1.489	-0.936	0.191	0.744	0.553	11.44	11.06	19.64	20.21	25.27	17.98	11.75	21.21	2.73	5.37	5.86	10.2	3.95
27.91	1.4	2.126	1.338	1.862	2.174	-0.302	2.095	1.216	0.726	-0.062	0.462	0.774	-1.702	0.695	-0.184	-0.788	-0.265	0.048	-2.428	-0.031	-0.911	0.524	0.836	-1.64	0.757	-0.122	0.312	-2.163	0.234	-0.646	-2.476	-0.079	-0.958	2.397	1.517	-0.88	23.25	35.3	22.22	18.9	36.09	-2.8	34.79	20.18	12.06	-1.03	4.69	12.85	-15.77
19.83	-0.451	0.669	-0.182	-0.258	-0.099	0.369	1.704	0.346	1.121	0.27	0.193	0.352	0.82	2.155	0.797	-0.851	-0.927	-0.769	-0.3	1.035	-0.323	-0.076	0.082	0.551	1.886	0.528	0.159	0.627	1.962	0.604	0.468	1.803	0.445	1.335	-0.023	-1.358	-0.69	1.03	-0.28	-0.4	-0.15	0.57	2.62	0.53	1.73	0.41	0.3	0.54	1.26
17.74	0	1.405	0	0	0	0.056	0	0.069	1.405	0	0	0	0.056	0	0.069	-1.405	-1.405	-1.405	-1.35	-1.405	-1.336	0	0	0.056	0	0.069	0	0.056	0	0.069	0.056	0	0.069	-0.056	0.014	0.069	0	0	0	0	0	0	0	0	0	0	0	0	0
20.36	-0.807	-0.877	-0.271	-0.437	0.825	0.551	2.203	0.555	-0.069	0.537	0.37	1.633	1.358	3.01	1.362	0.606	0.44	1.702	1.427	3.08	1.432	-0.166	1.096	0.821	2.473	0.826	1.263	0.988	2.64	0.992	-0.275	1.377	-0.271	1.652	0.004	-1.648	-19.49	-21.17	-6.54	-10.55	19.93	12.85	32.11	13.39	-1.68	12.95	8.94	39.42	31.69
27.74	1.623	2.35	1.583	1.845	2.354	-0.138	2.287	1.461	0.727	-0.04	0.222	0.731	-1.761	0.664	-0.162	-0.767	-0.505	0.005	-2.487	-0.063	-0.889	0.262	0.771	-1.721	0.704	-0.122	0.509	-1.983	0.442	-0.384	-2.492	-0.067	-0.893	2.425	1.598	-0.826	16.64	24.1	16.24	12.9	24.14	-0.85	23.45	14.98	7.45	-0.41	1.55	7.5	-10.84
23.01	1.075	2.547	4.211	3.725	5.298	4.141	-0.288	4.884	1.472	3.136	2.65	4.223	3.066	-1.363	3.81	1.664	1.178	2.751	1.594	-2.835	2.338	-0.486	1.087	-0.07	-4.499	0.674	1.573	0.416	-4.013	1.16	-1.157	-5.586	-0.413	-4.429	0.744	5.173	4.21	8.82	31.46	27.09	54.77	42.81	-2.98	50.5	3.95	11.56	9.7	16.56	12.02
23.45	-0.398	1.523	0.168	0.129	0.359	-0.389	-0.775	-0.091	1.921	0.565	0.527	0.757	0.009	-0.378	0.307	-1.355	-1.394	-1.164	-1.912	-2.298	-1.614	-0.038	0.192	-0.557	-0.943	-0.259	0.23	-0.518	-0.905	-0.22	-0.748	-1.135	-0.45	-0.386	0.298	0.684	-1.26	4.81	0.53	0.41	1.13	-1.23	-1.28	-0.29	6.07	1.79	1.66	2.39	0.03
23.45	-0.398	1.523	0.168	0.129	0.359	-0.389	-0.775	-0.091	1.921	0.565	0.527	0.757	0.009	-0.378	0.307	-1.355	-1.394	-1.164	-1.912	-2.298	-1.614	-0.038	0.192	-0.557	-0.943	-0.259	0.23	-0.518	-0.905	-0.22	-0.748	-1.135	-0.45	-0.386	0.298	0.684	-1.26	4.81	0.53	0.41	1.13	-1.23	-1.28	-0.29	6.07	1.79	1.66	2.39	0.03
23.01	1.152	2.603	4.211	3.765	5.07	4.141	-0.288	4.884	1.45	3.059	2.613	3.918	2.989	-1.44	3.732	1.608	1.163	2.467	1.538	-2.891	2.282	-0.445	0.859	-0.07	-4.499	0.674	1.305	0.375	-4.054	1.119	-0.929	-5.358	-0.186	-4.429	0.744	5.173	3.44	7	21.6	18.98	29.65	24.21	-1.68	28.56	3.09	8.8	7.48	11.7	8.93
18.38	-0.034	0.873	-0.019	-0.019	-0.04	0.076	-0.025	0.088	0.907	0.015	0.015	-0.007	0.109	0.008	0.121	-0.892	-0.892	-0.913	-0.797	-0.898	-0.785	0	-0.021	0.094	-0.006	0.106	-0.021	0.094	-0.006	0.107	0.116	0.015	0.128	-0.101	0.012	0.113	-0.03	0.87	-0.02	-0.02	-0.04	0.07	-0.03	0.09	0.9	0.01	0.01	-0.01	0.11
18.07	0.773	0	0	1.322	2.28	0.056	0	0.069	-0.773	-0.773	0.548	1.507	-0.718	-0.773	-0.704	0	1.322	2.28	0.056	0	0.069	1.322	2.28	0.056	0	0.069	0.958	-1.266	-1.322	-1.252	-2.225	-2.28	-2.211	-0.056	0.014	0.069	5.63	0	0	7.52	37.7	0.92	0	1.15	-5.63	-5.63	2.55	10.97	-5.23
20.38	0.156	0.764	-0.271	1.212	-0.779	0.551	-0.288	0.555	0.608	-0.427	1.055	-0.935	0.394	-0.445	0.398	-1.035	0.448	-1.543	-0.214	-1.052	-0.209	1.483	-0.508	0.821	-0.017	0.826	-1.991	-0.661	-1.5	-0.657	1.329	0.491	1.333	-0.839	0.004	0.843	3.78	7.66	-6.54	15.78	-18.8	12.85	-6.96	13.39	6.09	-10.32	13.74	-22.57	9.2
19.8	-0.424	-0.09	-0.121	0.964	1.197	0.333	-0.144	0.36	0.334	0.303	1.388	1.621	0.756	0.279	0.783	-0.031	1.054	1.287	0.422	-0.055	0.449	1.085	1.318	0.453	-0.024	0.481	0.233	-0.632	-1.109	-0.604	-0.864	-1.341	-0.837	-0.477	0.027	0.504	-0.6	-0.13	-0.17	1.36	1.68	0.47	-0.2	0.51	0.47	0.43	1.95	2.28	1.06
20.39	-0.807	-1.327	-0.271	-0.142	1.415	0.551	1.978	0.555	-0.52	0.537	0.665	2.222	1.358	2.785	1.362	1.056	1.185	2.742	1.878	3.305	1.882	0.129	1.686	0.821	2.249	0.826	1.557	0.693	2.12	0.697	-0.864	0.563	-0.86	1.427	0.004	-1.423	-8.58	-6.78	-2.88	-1.15	11.19	5.85	13.09	5.9	-2.66	5.7	5.37	17.57	14.44
19.81	0.768	0.067	-0.169	1.176	2.543	0.293	2.786	0.872	-0.701	-0.937	0.408	1.775	-0.475	2.018	0.104	-0.236	1.109	2.477	0.227	2.719	0.805	1.345	2.712	0.462	2.955	1.041	1.368	-0.882	1.61	-0.304	-2.25	0.242	-1.672	2.492	0.578	-1.914	1.26	0.11	-0.25	1.93	4.17	0.4	4.57	1.34	-1.38	-1.6	0.8	3.49	-0.73
20.58	-0.807	0.453	-0.271	-0.179	1.587	0.551	1.768	0.555	1.261	0.537	0.628	2.394	1.358	2.575	1.362	-0.724	-0.633	1.133	0.097	1.315	0.101	0.092	1.858	0.821	2.039	0.826	1.766	0.73	1.947	0.734	-1.036	0.181	-1.032	1.217	0.004	-1.213	-13.74	7.71	-4.61	-2.19	27	9.37	25.69	9.44	21.45	9.13	7.67	40.74	23.11
20.27	1.106	2.303	-0.182	1.82	0.48	0.369	-0.187	0.346	1.197	-1.287	0.714	-0.626	-0.737	-1.293	-0.76	-2.484	-0.483	-1.823	-1.934	-2.49	-1.957	2.002	0.661	0.551	-0.006	0.528	-1.34	-1.451	-2.007	-1.474	-0.11	-0.667	-0.134	-0.556	-0.023	0.533	1.68	3.5	-0.28	2.77	0.73	0.56	-0.28	0.53	1.82	-1.96	1.09	-0.95	-1.12
20.71	0.547	1.734	-0.271	1.289	0.752	0.551	-0.288	0.555	1.187	-0.818	0.742	0.205	0.003	-0.835	0.007	-2.005	-0.445	-0.982	-1.184	-2.022	-1.18	1.56	1.023	0.821	-0.017	0.826	-0.537	-0.739	-1.578	-0.735	-0.202	-1.04	-0.197	-0.839	0.004	0.843	4.06	30.85	-4.82	22.94	13.38	9.79	-5.13	9.87	8.8	-6.07	5.5	1.52	0.02
21	0.445	0.231	0.704	1.068	-0.109	-0.097	-0.473	-0.093	-0.213	0.259	0.624	-0.553	-0.542	-0.917	-0.538	0.473	0.837	-0.34	-0.329	-0.704	-0.324	0.364	-0.813	-0.801	-1.177	-0.797	-1.177	-1.166	-1.541	-1.161	0.011	-0.364	0.016	-0.375	0.004	0.38	1.82	0.84	2.88	4.37	-0.44	-0.4	-1.72	-0.38	-0.97	1.45	3.49	-3.1	-3.04
18.11	2.353	2.38	0	0	0	0.056	0	0.069	0.028	-2.353	-2.353	-2.353	-2.297	-2.353	-2.283	-2.38	-2.38	-2.38	-2.325	-2.38	-2.311	0	0	0.056	0	0.069	0	0.056	0	0.069	0.056	0	0.069	-0.056	0.014	0.069	0	1145.38	0	0	0	0	0	0	0	0	0	0	0
18.91	-2.528	-4.614	-3.062	-3.975	-3.996	-3.88	-3.981	-3.868	-2.086	-0.534	-1.447	-1.468	-1.352	-1.453	-1.34	1.552	0.639	0.618	0.734	0.633	0.746	-0.913	-0.934	-0.818	-0.919	-0.806	-0.021	0.094	-0.006	0.107	0.116	0.015	0.128	-0.101	0.012	0.113	-2.51	-4.58	-2.92	-3.94	-3.96	-3.85	-3.95	-3.84	-2.07	-0.51	-1.43	-1.46	-1.34
20.65	-0.807	-0.037	-0.271	1.275	1.657	0.551	1.415	0.555	0.77	0.537	2.082	2.464	1.358	2.222	1.362	-0.234	1.312	1.694	0.588	1.452	0.592	1.545	1.928	0.821	1.686	0.826	0.382	-0.724	0.14	-0.72	-1.106	-0.242	-1.102	0.864	0.004	-0.86	-9.68	-0.44	-3.25	12.27	14.93	6.6	16.96	6.65	9.23	6.43	20.04	22.21	16.27
20.23	0.394	0.209	-0.271	0.156	-0.779	0.551	-0.288	0.555	-0.185	-0.665	-0.239	-1.173	0.156	-0.683	0.16	-0.48	-0.054	-0.988	0.341	-0.498	0.345	0.427	-0.508	0.821	-0.017	0.826	-0.934	0.395	-0.444	0.399	1.329	0.491	1.333	-0.839	0.004	0.843	5.37	3.73	-4.82	1.31	-13.85	9.79	-5.13	9.87	-2.52	-9.06	-1.86	-15.98	2.13
20.31	-0.342	1.481	-0.271	-0.437	-0.486	0.551	0.187	0.555	1.823	0.072	-0.095	-0.143	0.893	0.53	0.897	-1.752	-1.918	-1.966	-0.93	-1.294	-0.926	-0.166	-0.215	0.821	0.458	0.826	-0.049	0.988	0.624	0.992	1.036	0.673	1.04	-0.363	0.004	0.368	-3.81	16.46	-3.01	-4.86	-4.26	6.12	1.31	6.17	20.27	0.8	-1.05	-1.26	9.93
19.18	1.28	0.283	-0.031	-0.032	-0.073	0.151	-0.044	0.151	-0.997	-1.311	-1.312	-1.353	-1.129	-1.323	-1.129	-0.314	-0.315	-0.356	-0.132	-0.326	-0.132	0	-0.042	0.183	-0.012	0.183	-0.041	0.183	-0.012	0.183	0.224	0.03	0.224	-0.195	0	0.195	84.1	10.53	-5.22	-5.3	-12.14	25.08	-7.23	25.06	-32.93	-86.16	-86.19	-88.91	-74.16
17.94	2.367	0.899	0	0	0	0.056	0	0.069	-1.468	-2.367	-2.367	-2.367	-2.311	-2.367	-2.297	-0.899	-0.899	-0.899	-0.844	-0.899	-0.83	0	0	0.056	0	0.069	0	0.056	0	0.069	0.056	0	0.069	-0.056	0.014	0.069	0	0	0	0	0	0	0	0	0	0	0	0	0
20.56	-0.807	-0.352	-0.271	-0.084	1.844	0.551	2.046	0.555	0.455	0.537	0.724	2.651	1.358	2.853	1.362	0.081	0.269	2.196	0.903	2.398	0.907	0.187	2.115	0.821	2.317	0.826	1.927	0.634	2.129	0.638	-1.293	0.202	-1.289	1.495	0.004	-1.491	-8.58	-3.2	-2.88	-0.67	19.6	5.85	14.11	5.9	4.14	5.7	5.78	28.18	14.44
17.73	0	1.382	0	0	0	0.056	0	0.069	1.382	0	0	0	0.056	0	0.069	-1.382	-1.382	-1.382	-1.327	-1.382	-1.313	0	0	0.056	0	0.069	0	0.056	0	0.069	0.056	0	0.069	-0.056	0.014	0.069	0	0	0	0	0	0	0	0	0	0	0	0	0
23.1	-1.731	-4.145	-1.161	-1.035	0.615	0	2.979	-1.731	-2.414	0.57	0.696	2.346	1.731	4.71	0	2.984	3.11	4.76	4.145	7.124	2.413	0.126	1.776	1.161	4.14	-0.571	1.65	1.035	4.014	-0.697	-0.615	2.364	-2.347	2.979	-1.731	-4.71	-5.86	-14.03	-3.37	-3.5	2.08	0	10.08	-4.01	-8.17	1.66	2.36	7.94	5.86
23.02	0.583	3.145	-0.136	1.196	0.832	-1.85	2.085	-1.846	2.563	-0.719	0.613	0.249	-2.433	1.502	-2.429	-3.282	-1.95	-2.313	-4.996	-1.06	-4.992	1.332	0.968	-1.714	2.221	-1.71	-0.364	-3.046	0.89	-3.042	-2.682	1.253	-2.678	3.936	0.004	-3.931	2.42	13.07	-0.56	4.97	3.46	-7.69	8.6	-7.67	11.29	-3.11	2.7	1.1	-10.72
18.74	-0.034	1.176	-0.013	1.456	1.35	0.131	-0.018	0.133	1.21	0.021	1.49	1.383	0.165	0.015	0.167	-1.189	0.28	0.173	-1.045	-1.195	-1.044	1.469	1.362	0.144	-0.006	0.146	-0.107	-1.325	-1.475	-1.324	-1.218	-1.368	-1.217	-0.15	0.002	0.151	-0.03	1.15	-0.01	1.43	1.32	0.13	-0.02	0.13	1.19	0.02	1.46	1.35	0.16
21.39	1.51	2.83	0.465	1.242	2.595	0.551	1.235	0.555	1.32	-1.045	-0.268	1.085	-0.959	-0.275	-0.955	-2.365	-1.589	-0.235	-2.28	-1.595	-2.276	0.777	2.13	0.086	0.77	0.09	1.353	-0.691	-0.006	-0.687	-2.045	-1.36	-2.04	0.685	0.004	-0.681	15.04	30.09	2.64	13.2	27.59	5.85	11.28	5.9	13.16	-5.83	-2.67	10.81	-9.56
26.99	-1.589	-2.092	0.594	-3.361	-3.607	-1.247	-3.583	-2.382	-0.503	2.183	-1.772	-2.018	0.342	-1.994	-0.793	2.686	-1.269	-1.515	0.845	-1.491	-0.29	-3.955	-4.201	-1.841	-4.177	-2.976	-0.246	2.113	-0.223	0.979	2.36	0.024	1.225	-2.336	-1.135	1.201	-24.9	-32.79	9.31	-52.67	-37.45	-19.55	-38.28	-37.34	-8.33	36.17	-29.36	-21.45	5.66
27.78	-1.591	-1.756	-0.281	-2.976	-2.403	-1.726	-3.19	-1.499	-0.165	1.31	-1.385	-0.812	-0.135	-1.599	0.092	1.475	-1.219	-0.646	0.03	-1.434	0.257	-2.695	-2.122	-1.445	-2.909	-1.218	0.573	1.25	-0.214	1.477	0.677	-0.787	0.904	-1.464	0.227	1.691	-11.29	-11.97	-1.99	-21.11	-17.05	-12.24	-22.63	-10.64	-1.13	9.29	-9.82	-5.76	-0.96
26.35	-0.675	-0.473	-0.441	-1.964	-2.948	-0.768	-3.156	-2.151	0.202	0.234	-1.289	-2.273	-0.093	-2.481	-1.476	0.032	-1.491	-2.476	-0.296	-2.683	-1.678	-1.523	-2.507	-0.327	-2.714	-1.71	-0.984	1.196	-1.192	-0.187	2.18	-0.207	0.797	-2.387	-1.383	1.004	-3.73	-2.61	-2.44	-10.84	-16.27	-4.24	-17.42	-11.87	1.12	1.29	-7.12	-12.55	-0.52
21.22	-1.354	-3.663	-1.414	-3.866	-4.187	-3.305	-4.143	-3.3	-2.309	-0.059	-2.512	-2.833	-1.95	-2.789	-1.946	2.249	-0.203	-0.524	0.358	-0.48	0.363	-2.453	-2.773	-1.891	-2.73	-1.887	-0.321	0.562	-0.277	0.566	0.882	0.044	0.887	-0.839	0.004	0.843	-12.11	-27.15	-9.89	-25.73	-27.23	-29.55	-37.05	-29.51	-17.11	-0.42	-16.72	-18.42	-17.44
21.34	0.437	0.773	1.117	1.92	2.313	0.551	2.872	0.555	0.336	0.68	1.483	1.876	0.114	2.435	0.118	0.343	1.147	1.54	-0.223	2.099	-0.219	0.804	1.196	-0.566	1.755	-0.562	0.393	-1.37	0.952	-1.366	-1.762	0.559	-1.758	2.321	0.004	-2.317	2.97	5.86	6.88	14.55	17.52	4.17	13.25	4.2	2.29	3.89	10.1	12.78	0.77
20.4	-0.253	0.628	-0.271	-0.154	0.04	0.551	0.93	0.555	0.881	-0.018	0.099	0.293	0.803	1.182	0.807	-0.899	-0.782	-0.588	-0.077	0.302	-0.073	0.117	0.311	0.821	1.2	0.826	0.194	0.705	1.084	0.709	0.511	0.89	0.515	0.379	0.004	-0.375	-4.5	11.17	-4.82	-1.74	0.62	9.79	16.54	9.87	15.66	-0.32	1.11	4.58	14.29
18.84	-1.974	-2.596	-1.953	-0.76	-1.973	-1.809	-1.959	0.611	-0.622	0.021	1.214	0.001	0.165	0.015	2.585	0.644	1.836	0.623	0.787	0.638	3.207	1.192	-0.02	0.144	-0.006	2.564	-1.213	-1.049	-1.198	1.371	0.164	0.015	2.584	-0.15	2.42	2.569	-1.95	-2.56	-1.93	-0.69	-1.95	-1.78	-1.93	0.47	-0.61	0.02	1.1	0	0.16
24.13	-0.66	0.335	-0.675	-3.708	-3.634	-3.533	-3.522	-5.754	0.995	-0.015	-3.049	-2.975	-2.873	-2.862	-5.095	-1.01	-4.044	-3.969	-3.868	-3.857	-6.089	-3.033	-2.959	-2.858	-2.847	-5.079	0.074	0.175	0.187	-2.046	0.101	0.113	-2.12	0.011	-2.221	-2.233	-5.29	2.69	-4.75	-29.76	-24.75	-10.87	-21.14	-46.18	7.99	-0.11	-24.47	-20.26	-8.84
22.1	1.651	3.385	0.912	1.312	-0.636	-1.031	-1.407	-1.027	1.734	-0.739	-0.339	-2.287	-2.682	-3.058	-2.678	-2.472	-2.073	-4.021	-4.416	-4.792	-4.412	0.4	-1.549	-1.944	-2.319	-1.94	-1.948	-2.343	-2.719	-2.339	-0.395	-0.77	-0.391	-0.375	0.004	0.38	6.42	11.5	3.55	5.1	-2.47	-4.01	-5.02	-3.99	5.89	-2.87	-1.32	-8.89	-10.42
19.59	-0.067	-0.76	-0.031	-0.032	3.404	0.151	2.558	0.151	-0.693	0.036	0.035	3.472	0.219	2.626	0.219	0.728	0.728	4.164	0.911	3.318	0.911	0	3.436	0.183	2.59	0.183	3.436	0.183	2.59	0.183	-3.253	-0.846	-3.253	2.407	0	-2.407	-11.66	-21.35	-5.44	-5.52	94.91	26.16	129.64	26.14	-19.46	6.22	6.13	96.79	37.82
19.94	-0.449	-0.179	-1.515	-1.605	-1.8	-1.062	-1.539	-1.035	0.27	-1.066	-1.156	-1.351	-0.613	-1.09	-0.585	-1.336	-1.426	-1.621	-0.883	-1.36	-0.856	-0.09	-0.285	0.453	-0.024	0.481	-0.195	0.543	0.066	0.571	0.738	0.261	0.765	-0.477	0.027	0.504	-0.64	-0.26	-2.16	-2.29	-2.57	-1.51	-2.19	-1.48	0.39	-1.52	-1.65	-1.93	-0.87
23.45	-1.058	-3.815	-0.441	-0.688	-1.786	0.339	-4.193	-0.22	-2.757	0.617	0.37	-0.728	1.397	-3.136	0.838	3.374	3.127	2.029	4.154	-0.379	3.595	-0.247	-1.345	0.78	-3.752	0.221	-1.099	1.027	-3.506	0.467	2.125	-2.407	1.566	-4.533	-0.559	3.973	-4.79	-14.95	-1.99	-3.11	-8.08	1.44	-15.02	-1	-10.8	2.79	1.68	-3.3	5.94
20.76	-0.228	-1.948	-0.816	-2.618	-2.96	-1.63	-2.469	-1.626	-1.72	-0.588	-2.39	-2.732	-1.402	-2.241	-1.398	1.131	-0.67	-1.012	0.317	-0.521	0.321	-1.802	-2.143	-0.814	-1.653	-0.81	-0.342	0.988	0.149	0.992	1.329	0.491	1.333	-0.839	0.004	0.843	-7.25	-62.44	-15.67	-83.93	-94.88	-46.61	-79.15	-52.14	-54.67	-11.26	-75.98	-86.84	-39.82
20.09	0.151	-1.337	-0.271	0.742	-0.779	0.551	-0.288	0.555	-1.488	-0.422	0.591	-0.929	0.4	-0.439	0.404	1.066	2.079	0.559	1.888	1.049	1.892	1.013	-0.508	0.821	-0.017	0.826	-1.521	-0.191	-1.03	-0.187	1.329	0.491	1.333	-0.839	0.004	0.843	1.87	-9.35	-4.82	9.88	-13.85	9.79	-5.13	9.87	-9.65	-5.24	6.25	-11.55	4.97
20.34	-3.168	-4.104	-0.275	-2.797	-3.139	-1.81	-2.648	-1.806	-0.936	2.892	0.37	0.029	1.358	0.519	1.362	3.829	1.307	0.965	2.294	1.456	2.299	-2.522	-2.863	-1.534	-2.373	-1.53	-0.342	0.988	0.149	0.992	1.329	0.491	1.333	-0.839	0.004	0.843	-46.82	-39.66	-3.6	-41.34	-46.39	-26.18	-39.14	-26.69	-10.87	57.12	10.29	0.8	35.08
23.13	1.235	-6.812	-1.341	-2.513	-0.194	0.615	-4.811	-0.266	-8.047	-2.576	-3.748	-1.429	-0.62	-6.047	-1.501	5.471	4.298	6.618	7.426	2	6.546	-1.173	1.147	1.955	-3.471	1.075	2.319	3.128	-2.298	2.247	0.809	-4.617	-0.072	-5.426	-0.881	4.546	12.15	-67.02	-6.7	-24.73	-1.91	4.7	-47.34	-2.62	-109.55	-13.75	-51.03	-19.46	-5.62
21.14	-2.563	-4.774	-1.212	-2.216	-1.048	-1.935	2.082	-1.931	-2.211	1.351	0.347	1.515	0.628	4.644	0.632	3.562	2.558	3.725	2.839	6.855	2.843	-1.004	0.163	-0.723	3.293	-0.719	1.167	0.281	4.297	0.285	-0.887	3.13	-0.882	4.016	0.004	-4.012	-15.34	-28.56	-6.93	-9.16	-3.72	-11.58	12.46	-11.55	-13.23	7.73	1.44	5.37	3.76
20.59	0.548	0.728	1.217	1.016	1.432	-1.119	0.268	-1.12	0.181	0.669	0.469	0.884	-1.667	-0.28	-1.667	0.488	0.288	0.703	-1.848	-0.461	-1.848	-0.201	0.215	-2.336	-0.949	-2.336	0.416	-2.136	-0.748	-2.136	-2.551	-1.164	-2.551	1.387	0	-1.387	2.64	3	5.87	4.9	6.91	-5.4	1.29	-5.4	1.19	7.87	5.51	10.4	-19.61
26.03	5.16	6.134	4.13	4.026	4.114	0.643	4.716	4.188	0.975	-1.03	-1.134	-1.046	-4.517	-0.443	-0.972	-2.004	-2.108	-2.02	-5.491	-1.418	-1.947	-0.104	-0.016	-3.487	0.586	0.058	0.088	-3.383	0.691	0.162	-3.471	0.602	0.073	4.073	3.544	-0.529	15.72	18.69	12.59	12.27	12.54	1.43	14.14	12.76	7.66	-8.09	-8.91	-8.21	-13.6
21.33	0.45	0.288	-0.23	0.221	-1.043	-1.031	-1.407	-1.027	-0.162	-0.68	-0.229	-1.493	-1.481	-1.857	-1.477	-0.518	-0.067	-1.331	-1.32	-1.695	-1.316	0.451	-0.813	-0.801	-1.177	-0.797	-1.264	-1.252	-1.628	-1.248	0.011	-0.364	0.016	-0.375	0.004	0.38	1.66	0.9	-1.15	1.1	-5.2	-5.14	-5.97	-5.12	-0.44	-2.5	-0.84	-5.5	-5.45
18.39	-0.034	0.867	-0.013	-0.013	-0.033	0.131	-0.018	0.133	0.901	0.021	0.021	0.001	0.165	0.015	0.167	-0.88	-0.88	-0.9	-0.736	-0.886	-0.734	0	-0.02	0.144	-0.006	0.146	-0.02	0.144	-0.005	0.146	0.164	0.015	0.166	-0.15	0.002	0.151	-0.03	0.86	-0.01	-0.01	-0.03	0.13	-0.02	0.13	0.89	0.02	0.02	0	0.16
18.54	-0.034	-0.658	-0.019	1.975	0.912	0.076	-0.025	0.088	-0.625	0.015	2.009	0.946	0.109	0.008	0.121	0.64	2.634	1.57	0.734	0.633	0.746	1.994	0.931	0.094	-0.006	0.106	-1.063	-1.9	-2.001	-1.888	-0.836	-0.937	-0.824	-0.101	0.012	0.113	-0.03	-0.65	-0.02	1.96	0.87	0.07	-0.03	0.09	-0.62	0.01	1.99	0.9	0.11
17.74	0	0	0	0	1.452	0.056	0	0.069	0	0	0	1.452	0.056	0	0.069	0	0	1.452	0.056	0	0.069	0	1.452	0.056	0	0.069	1.452	0.056	0	0.069	-1.396	-1.452	-1.383	-0.056	0.014	0.069	0	0	0	0	0	0	0	0	0	0	0	0	0
17.79	0	1.867	0	0	0	0.056	0	0.069	1.867	0	0	0	0.056	0	0.069	-1.867	-1.867	-1.867	-1.812	-1.867	-1.798	0	0	0.056	0	0.069	0	0.056	0	0.069	0.056	0	0.069	-0.056	0.014	0.069	0	0	0	0	0	0	0	0	0	0	0	0	0
19.52	-0.424	-1.482	-0.121	-0.211	1.286	0.333	-0.144	0.36	-1.059	0.303	0.213	1.71	0.756	0.279	0.783	1.362	1.272	2.769	1.815	1.338	1.842	-0.09	1.407	0.453	-0.024	0.481	1.497	0.543	0.066	0.571	-0.953	-1.43	-0.926	-0.477	0.027	0.504	-0.61	-2.13	-0.17	-0.3	1.85	0.48	-0.21	0.52	-1.52	0.44	0.31	2.46	1.09
19.52	0.15	-3.018	0.612	-1.735	-1.776	-1.552	-1.747	-1.552	-3.168	0.462	-1.885	-1.926	-1.702	-1.897	-1.702	3.629	1.283	1.241	1.466	1.271	1.466	-2.347	-2.388	-2.163	-2.358	-2.163	-0.041	0.183	-0.012	0.183	0.224	0.03	0.224	-0.195	0	0.195	2.18	-44.17	8.5	-25.4	-26	-22.72	-25.57	-22.72	-280.06	18.27	-166.65	-170.3	-150.46
18.4	-0.034	0.899	-0.013	-0.013	-0.033	0.131	-0.018	0.133	0.932	0.021	0.021	0.001	0.165	0.015	0.167	-0.911	-0.912	-0.932	-0.767	-0.917	-0.766	0	-0.02	0.144	-0.006	0.146	-0.02	0.144	-0.005	0.146	0.164	0.015	0.166	-0.15	0.002	0.151	-0.03	0.89	-0.01	-0.01	-0.03	0.13	-0.02	0.13	0.92	0.02	0.02	0	0.16
20.34	0.318	0.851	-0.271	0.616	-0.779	0.551	-0.288	0.555	0.533	-0.589	0.298	-1.096	0.233	-0.606	0.237	-1.121	-0.235	-1.629	-0.3	-1.139	-0.296	0.887	-0.508	0.821	-0.017	0.826	-1.395	-0.065	-0.904	-0.061	1.329	0.491	1.333	-0.839	0.004	0.843	4.87	15.13	-4.82	4.09	-13.85	9.79	-5.13	9.87	8.17	-9.02	1.94	-16.81	3.57
20.33	1.638	2.9	1.597	2.235	1.421	-1.879	1.388	-1.865	1.263	-0.041	0.597	-0.217	-3.517	-0.25	-3.503	-1.304	-0.666	-1.48	-4.779	-1.513	-4.765	0.638	-0.176	-3.475	-0.209	-3.462	-0.814	-4.114	-0.847	-4.1	-3.299	-0.033	-3.285	3.266	0.014	-3.252	6.42	11.76	6.52	9.12	5.63	-7.67	5.67	-7.61	11.32	-0.38	5.54	-1.76	-32.63
19.91	-0.179	-2.709	0.279	0.656	-1.441	-0.094	-2.709	2.93	-2.53	0.458	0.835	-1.262	0.086	-2.53	3.109	2.987	3.365	1.268	2.615	0	5.639	0.377	-1.719	-0.372	-2.987	2.651	-2.097	-0.749	-3.365	2.274	1.347	-1.268	4.371	-2.615	3.023	5.639	-0.97	-14.71	1.51	3.56	-5.34	-0.28	-14.71	15.51	-26.96	4.88	8.9	-5.78	0.29
20.55	0.92	1.579	-0.271	1.17	-0.779	0.551	-0.288	0.555	0.658	-1.191	0.249	-1.699	-0.37	-1.209	-0.366	-1.849	-0.409	-2.357	-1.028	-1.867	-1.024	1.441	-0.508	0.821	-0.017	0.826	-1.948	-0.619	-1.458	-0.615	1.329	0.491	1.333	-0.839	0.004	0.843	15.56	28.08	-4.82	11.48	-13.85	9.79	-5.13	9.87	11.13	-20.14	2.41	-28.73	-6.26
23.72	0.252	-0.554	-2.278	-1.198	-3.8	-1.67	-6.14	-5.297	-0.806	-2.53	-1.45	-4.052	-1.922	-6.392	-5.549	-1.724	-0.644	-3.246	-1.116	-5.586	-4.743	1.081	-1.522	0.608	-3.862	-3.019	-2.603	-0.472	-4.942	-4.099	2.13	-2.34	-1.497	-4.47	-3.627	0.843	6.02	-13.23	-54.42	-28.61	-90.78	-15.33	-146.67	-126.54	-23.68	-74.32	-42.58	-119.03	-18.11
21.66	4.437	3.429	0.664	2.955	1.09	0.551	-0.288	0.555	-1.008	-3.773	-1.482	-3.347	-3.886	-4.725	-3.882	-2.765	-0.474	-2.339	-2.878	-3.717	-2.874	2.29	0.426	-0.114	-0.952	-0.11	-1.865	-2.404	-3.243	-2.4	-0.539	-1.378	-0.535	-0.839	0.004	0.843	26.02	11.92	2.75	20.21	7.45	3.77	-1.97	3.79	-3.35	-14.68	-8.69	-19.63	-22.79
26.98	-0.926	-3.96	-0.096	0.588	0.506	0.609	-0.957	1.114	-3.033	0.831	1.515	1.433	1.535	-0.03	2.041	3.864	4.548	4.466	4.569	3.003	5.074	0.684	0.602	0.705	-0.861	1.21	-0.082	0.021	-1.545	0.526	0.102	-1.463	0.608	-1.565	0.505	2.071	-7.67	-22	-0.79	4.87	4.19	5.04	-7.92	9.22	-17.03	7.03	12.83	12.13	13
18.47	-0.034	-0.039	-0.013	-0.013	-0.033	0.131	1.587	0.133	-0.005	0.021	0.021	0.001	0.165	1.621	0.167	0.026	0.026	0.006	0.17	1.626	0.172	0	-0.02	0.144	1.6	0.146	-0.02	0.144	1.6	0.146	0.164	1.62	0.166	1.456	0.002	-1.454	-0.03	-0.04	-0.01	-0.01	-0.03	0.13	1.57	0.13	-0.01	0.02	0.02	0	0.16
17.85	0	0	0	0	2.454	0.056	0	0.069	0	0	0	2.454	0.056	0	0.069	0	0	2.454	0.056	0	0.069	0	2.454	0.056	0	0.069	2.454	0.056	0	0.069	-2.399	-2.454	-2.385	-0.056	0.014	0.069	0	0	0	0	0	0	0	0	0	0	0	0	0
17.84	0	1.354	0	0	0	0.056	0	1.027	1.354	0	0	0	0.056	0	1.027	-1.354	-1.354	-1.354	-1.299	-1.354	-0.327	0	0	0.056	0	1.027	0	0.056	0	1.027	0.056	0	1.027	-0.056	0.972	1.027	0	0	0	0	0	0	0	0	0	0	0	0	0
23.47	-0.709	1.603	-0.356	-0.531	1.131	-1.266	2.405	-0.904	2.312	0.353	0.178	1.84	-0.557	3.114	-0.195	-1.959	-2.134	-0.472	-2.869	0.802	-2.507	-0.175	1.487	-0.91	2.761	-0.548	1.663	-0.735	2.936	-0.373	-2.397	1.273	-2.036	3.671	0.362	-3.309	-2.21	4.87	-1.07	-1.65	3.52	-2.73	7.49	-1.81	7.03	1.07	0.55	5.73	-1.2
21.05	2.134	3.113	0.437	2.224	-0.779	0.551	-0.288	0.555	0.979	-1.697	0.09	-2.913	-1.584	-2.422	-1.58	-2.676	-0.889	-3.892	-2.563	-3.402	-2.559	1.787	-1.216	0.113	-0.726	0.117	-3.003	-1.674	-2.512	-1.67	1.329	0.491	1.333	-0.839	0.004	0.843	40.46	90.53	10.99	64.67	-22.64	14.69	-8.38	16.13	18.56	-30.07	1.7	-55.22	-28.9
20.75	0.345	2.239	-0.271	2.098	-0.005	0.551	-0.288	0.555	1.894	-0.615	1.753	-0.349	0.206	-0.633	0.21	-2.51	-0.141	-2.243	-1.688	-2.527	-1.684	2.369	0.266	0.821	-0.017	0.826	-2.102	-1.547	-2.386	-1.543	0.555	-0.284	0.559	-0.839	0.004	0.843	2.83	23.8	-2.88	21.45	-0.03	5.85	-3.06	5.9	15.55	-5.05	14.06	-1.83	1.69
17.76	0	1.632	0	0	0	0.056	0	0.069	1.632	0	0	0	0.056	0	0.069	-1.632	-1.632	-1.632	-1.577	-1.632	-1.563	0	0	0.056	0	0.069	0	0.056	0	0.069	0.056	0	0.069	-0.056	0.014	0.069	0	0	0	0	0	0	0	0	0	0	0	0	0
24.38	-0.002	-8.581	0.516	0.578	0.06	0.995	-6.581	-5.738	-8.58	0.518	0.58	0.062	0.997	-6.58	-5.737	9.098	9.159	8.642	9.577	2	2.843	0.062	-0.456	0.479	-7.097	-6.255	-0.518	0.417	-7.159	-6.316	0.935	-6.642	-5.799	-7.576	-6.734	0.843	-0.02	-212.65	10.03	14.32	1.5	24.66	-163.09	-142.2	-81.82	4.72	5.53	0.59	9.51
20.77	-0.146	-1.959	-2.989	-3.155	-3.497	-2.168	-3.007	-2.164	-1.813	-2.843	-3.009	-3.351	-2.022	-2.861	-2.018	-1.03	-1.196	-1.538	-0.209	-1.047	-0.205	-0.166	-0.508	0.821	-0.017	0.826	-0.342	0.988	0.149	0.992	1.329	0.491	1.333	-0.839	0.004	0.843	-1.77	-23.7	-36.19	-38.21	-42.34	-25.87	-36.4	-26.2	-50.11	-78.98	-83.59	-93.08	-52.23
20.12	-0.602	0.809	-0.271	-0.437	-0.779	0.551	-0.288	0.555	1.411	0.331	0.165	-0.177	1.152	0.314	1.157	-1.08	-1.247	-1.588	-0.259	-1.098	-0.255	-0.166	-0.508	0.821	-0.017	0.826	-0.342	0.988	0.149	0.992	1.329	0.491	1.333	-0.839	0.004	0.843	-16.23	19.49	-7.3	-11.78	-20.99	13.92	-7.77	14.95	33.99	8.92	4.44	-4.76	29.14
18.48	-0.034	-0.313	-0.013	-0.013	0.493	0.131	1.451	0.133	-0.279	0.021	0.021	0.527	0.165	1.485	0.167	0.3	0.3	0.807	0.444	1.764	0.446	0	0.506	0.144	1.464	0.146	0.506	0.144	1.464	0.146	-0.362	0.958	-0.361	1.32	0.002	-1.318	-0.03	-0.3	-0.01	-0.01	0.48	0.13	1.41	0.13	-0.27	0.02	0.02	0.51	0.16
17.75	0	1.488	0	0	0	0.056	0	0.069	1.488	0	0	0	0.056	0	0.069	-1.488	-1.488	-1.488	-1.432	-1.488	-1.418	0	0	0.056	0	0.069	0	0.056	0	0.069	0.056	0	0.069	-0.056	0.014	0.069	0	0	0	0	0	0	0	0	0	0	0	0	0
19.52	-0.451	0.146	-0.182	-0.258	-0.446	0.369	-0.187	0.346	0.597	0.27	0.193	0.005	0.82	0.264	0.797	-0.328	-0.404	-0.593	0.223	-0.334	0.2	-0.076	-0.265	0.551	-0.006	0.528	-0.188	0.627	0.071	0.604	0.815	0.259	0.792	-0.556	-0.023	0.533	-0.69	0.22	-0.28	-0.4	-0.69	0.57	-0.29	0.53	0.92	0.41	0.3	0.01	1.26
21.46	-0.532	0.347	-0.35	0.048	-1.305	-1.224	-0.13	-1.22	0.88	0.183	0.58	-0.773	-0.692	0.402	-0.688	-0.697	-0.3	-1.653	-1.572	-0.478	-1.568	0.398	-0.956	-0.875	0.219	-0.871	-1.353	-1.272	-0.178	-1.268	0.081	1.175	0.085	1.094	0.004	-1.09	-4.55	2.97	-2.99	0.41	-5.37	-10.47	-0.44	-10.43	7.52	1.56	4.96	-3.18	-5.92
20.38	0.121	0.515	-0.271	-0.437	0.266	0.551	0.587	0.555	0.393	-0.392	-0.559	0.145	0.429	0.465	0.433	-0.786	-0.952	-0.249	0.036	0.072	0.04	-0.166	0.537	0.821	0.858	0.826	0.703	0.988	1.024	0.992	0.284	0.321	0.289	0.036	0.004	-0.032	1.16	5.47	-2.88	-4.65	2.83	5.85	3.2	5.9	3.77	-3.76	-5.35	1.39	4.11
18.46	-0.034	-0.212	-0.013	-0.013	1.677	0.131	-0.018	0.133	-0.178	0.021	0.021	1.711	0.165	0.015	0.167	0.199	0.199	1.889	0.343	0.193	0.345	0	1.69	0.144	-0.006	0.146	1.69	0.144	-0.005	0.146	-1.546	-1.695	-1.544	-0.15	0.002	0.151	-0.03	-0.21	-0.01	-0.01	1.65	0.13	-0.02	0.13	-0.18	0.02	0.02	1.69	0.16
20.61	-1.359	-0.728	-2.499	-2.665	-3.007	-1.678	-2.517	-1.674	0.632	-1.14	-1.306	-1.648	-0.319	-1.157	-0.314	-1.772	-1.938	-2.279	-0.95	-1.789	-0.946	-0.166	-0.508	0.821	-0.017	0.826	-0.342	0.988	0.149	0.992	1.329	0.491	1.333	-0.839	0.004	0.843	-8.6	-4.23	-23.19	-24.74	-27.91	-15.57	-23.35	-15.53	3.4	-8.87	-10.16	-12.81	-2.48
19.93	-0.451	0.088	-0.182	0.961	0.379	0.369	1.467	0.346	0.539	0.27	1.412	0.83	0.82	1.918	0.797	-0.27	0.873	0.291	0.281	1.379	0.258	1.143	0.561	0.551	1.649	0.528	-0.582	-0.592	0.506	-0.615	-0.01	1.088	-0.033	1.098	-0.023	-1.121	-0.51	0.1	-0.21	1.1	0.43	0.42	1.67	0.39	0.62	0.31	1.61	0.95	0.94
19.19	-0.067	0.526	-0.031	-0.032	1.154	0.151	-0.044	0.151	0.594	0.036	0.035	1.221	0.219	0.024	0.219	-0.558	-0.558	0.628	-0.375	-0.57	-0.375	0	1.185	0.183	-0.012	0.183	1.186	0.183	-0.012	0.183	-1.003	-1.197	-1.003	-0.195	0	0.195	-11.66	27.97	-5.44	-5.52	67.53	26.16	-7.54	26.14	31.55	6.22	6.13	71.47	37.82
19.96	-0.807	-0.7	-0.271	-0.437	-0.491	0.551	-0.288	0.555	0.107	0.537	0.37	0.317	1.358	0.519	1.362	0.429	0.263	0.209	1.251	0.412	1.255	-0.166	-0.22	0.821	-0.017	0.826	-0.054	0.988	0.149	0.992	1.041	0.203	1.045	-0.839	0.004	0.843	-19.49	-14	-6.54	-10.55	-6.62	12.85	-6.96	13.39	2.14	12.95	8.94	4.27	31.69
18.05	2.57	1.677	0	0	0	0.056	0	0.069	-0.894	-2.57	-2.57	-2.57	-2.515	-2.57	-2.501	-1.677	-1.677	-1.677	-1.621	-1.677	-1.607	0	0	0.056	0	0.069	0	0.056	0	0.069	0.056	0	0.069	-0.056	0.014	0.069	0	0	0	0	0	0	0	0	0	0	0	0	0
19.56	-0.451	0.517	-0.182	-0.258	-0.446	0.369	-0.187	0.346	0.968	0.27	0.193	0.005	0.82	0.264	0.797	-0.699	-0.775	-0.963	-0.148	-0.704	-0.171	-0.076	-0.265	0.551	-0.006	0.528	-0.188	0.627	0.071	0.604	0.815	0.259	0.792	-0.556	-0.023	0.533	-0.69	0.8	-0.28	-0.4	-0.69	0.57	-0.29	0.53	1.49	0.41	0.3	0.01	1.26
20.33	0.289	1.58	-0.271	-0.158	-0.779	0.551	-0.288	0.555	1.291	-0.56	-0.447	-1.068	0.262	-0.577	0.266	-1.851	-1.738	-2.359	-1.03	-1.868	-1.025	0.113	-0.508	0.821	-0.017	0.826	-0.62	0.709	-0.13	0.713	1.329	0.491	1.333	-0.839	0.004	0.843	6.93	38.14	-6.54	-2.14	-18.8	12.85	-6.96	13.39	30.97	-13.42	-6.05	-25.6	6.07
20.61	-0.491	-2.102	-0.481	-2.299	-2.641	-1.311	-2.15	-1.307	-1.611	0.01	-1.808	-2.149	-0.82	-1.659	-0.816	1.621	-0.197	-0.538	0.791	-0.048	0.795	-1.818	-2.16	-0.83	-1.669	-0.826	-0.342	0.988	0.149	0.992	1.329	0.491	1.333	-0.839	0.004	0.843	-5.22	-20.68	-5.11	-24.44	-28.07	-13.94	-22.86	-13.9	-15.85	0.11	-19.22	-22.85	-8.72
22.06	-0.241	-0.989	0.814	3.56	2	3.345	1.406	-0.269	-0.748	1.055	3.801	2.241	3.585	1.647	-0.028	1.803	4.549	2.989	4.333	2.395	0.72	2.746	1.186	2.53	0.592	-1.083	-1.56	-0.215	-2.154	-3.829	1.344	-0.594	-2.269	-1.939	-3.613	-1.675	-0.47	-1.91	1.57	6.88	3.44	6.46	2.72	-0.52	-1.54	2.18	7.84	4.06	7.4
20.42	-0.807	3.72	-0.271	-0.437	-0.779	0.551	-0.288	0.555	4.527	0.537	0.37	0.029	1.358	0.519	1.362	-3.991	-4.157	-4.499	-3.169	-4.008	-3.165	-0.166	-0.508	0.821	-0.017	0.826	-0.342	0.988	0.149	0.992	1.329	0.491	1.333	-0.839	0.004	0.843	-22.43	70.32	-7.52	-12.14	-21.63	14.22	-8	15.41	85.59	14.9	10.29	0.8	35.08
21.95	3.227	5.163	1.774	3.442	0.58	0.551	-0.288	1.565	1.936	-1.453	0.216	-2.647	-2.676	-3.515	-1.662	-3.389	-1.72	-4.582	-4.612	-5.451	-3.597	1.669	-1.193	-1.223	-2.062	-0.208	-2.862	-2.892	-3.73	-1.877	-0.03	-0.868	0.985	-0.839	1.015	1.853	31.1	49.77	16.23	23.18	5.59	5.31	-2.78	7.54	18.66	-13.29	1.45	-25.51	-25.8
18.21	-0.915	-0.413	-0.915	1.831	0.578	-0.86	-0.915	-0.846	0.502	0	2.746	1.493	0.056	0	0.069	-0.502	2.245	0.991	-0.446	-0.502	-0.432	2.746	1.493	0.056	0	0.069	-1.254	-2.691	-2.746	-2.677	-1.437	-1.493	-1.423	-0.056	0.014	0.069	-6.17	-2.34	-6.17	12.35	2.51	-5.8	-6.17	-5.7	4.42	0	45.4	8.01	0.92
19.52	-0.451	-0.19	-0.182	0.057	-0.446	0.369	-0.187	0.346	0.261	0.27	0.509	0.005	0.82	0.264	0.797	0.008	0.248	-0.256	0.559	0.003	0.536	0.239	-0.265	0.551	-0.006	0.528	-0.504	0.312	-0.245	0.289	0.815	0.259	0.792	-0.556	-0.023	0.533	-0.69	-0.29	-0.28	0.09	-0.68	0.56	-0.28	0.53	0.4	0.41	0.77	0.01	1.25
20.78	0.778	1.149	0.058	0.366	1.53	0.551	0.49	0.555	0.371	-0.721	-0.413	0.751	-0.228	-0.288	-0.224	-1.092	-0.783	0.381	-0.599	-0.659	-0.594	0.308	1.472	0.493	0.432	0.497	1.164	0.185	0.124	0.189	-0.979	-1.04	-0.975	-0.061	0.004	0.065	8.28	12.22	0.48	2.02	16.26	5.85	2.81	5.9	3.94	-6.02	-2.28	7.99	-2.42
20.78	2.967	2.593	-0.121	2.542	2.335	0.333	-0.144	0.36	-0.375	-3.088	-0.425	-0.633	-2.635	-3.112	-2.607	-2.713	-0.051	-0.258	-2.26	-2.737	-2.233	2.662	2.455	0.453	-0.024	0.481	-0.207	-2.209	-2.686	-2.182	-2.002	-2.479	-1.975	-0.477	0.027	0.504	4.26	3.73	-0.17	3.65	3.36	0.48	-0.21	0.52	-0.54	-4.44	-0.61	-0.91	-3.79
23.45	0.233	0.587	0.267	1.667	-1.473	1.671	-3.804	-1.291	0.354	0.033	1.433	-1.706	1.437	-4.037	-1.524	-0.321	1.079	-2.06	1.083	-4.391	-1.878	1.4	-1.74	1.404	-4.07	-1.557	-3.14	0.004	-5.47	-2.958	3.144	-2.33	0.182	-5.474	-2.962	2.513	0.55	1.39	0.63	3.94	-3.48	3.95	-8.99	-2.2	0.84	0.08	3.39	-4.04	3.4
20.47	-0.807	-2.288	1.498	-0.437	1.297	0.551	2.357	0.555	-1.481	2.305	0.37	2.104	1.358	3.164	1.362	3.786	1.851	3.585	2.839	4.645	2.843	-1.935	-0.201	-0.947	0.859	-0.943	1.734	0.988	2.794	0.992	-0.746	1.06	-0.742	1.806	0.004	-1.802	-19.49	-55.24	9.12	-10.55	24.55	12.85	37.3	13.39	-35.75	14.04	8.94	39.84	31.69
20.63	0.475	-0.084	-0.271	-0.437	1.558	0.551	1.772	0.555	-0.559	-0.746	-0.913	1.082	0.075	1.297	0.079	-0.187	-0.353	1.642	0.634	1.856	0.638	-0.166	1.829	0.821	2.043	0.826	1.995	0.988	2.209	0.992	-1.007	0.214	-1.003	1.222	0.004	-1.218	3.93	-0.85	-2.88	-4.65	9.81	5.85	6.51	5.9	-4.49	-6.17	-7.55	6.15	0.62
23.94	-0.258	1.959	1.117	-0.979	-2.902	0.462	-4.922	-2.232	2.217	1.375	-0.72	-2.644	0.72	-4.663	-1.973	-0.842	-2.937	-4.861	-1.497	-6.88	-4.19	-2.096	-4.019	-0.655	-6.039	-3.349	-1.923	1.44	-3.943	-1.253	3.364	-2.02	0.67	-5.383	-2.693	2.69	-0.84	6.37	3.63	-3.18	-9.44	1.5	-16.01	-4.44	7.21	4.47	-2.34	-8.6	2.34
19.54	2.733	2.094	-0.031	-0.032	-0.073	0.151	-0.044	0.151	-0.639	-2.764	-2.765	-2.806	-2.582	-2.776	-2.582	-2.125	-2.126	-2.167	-1.942	-2.137	-1.942	0	-0.042	0.183	-0.012	0.183	-0.041	0.183	-0.012	0.183	0.224	0.03	0.224	-0.195	0	0.195	200.27	54.94	-5.22	-5.3	-12.14	25.08	-7.23	25.06	-15.97	-202.57	-202.61	-205.63	-189.18
19.56	0.962	1.02	-0.031	-0.032	0.998	0.151	1.93	0.151	0.058	-0.993	-0.994	0.036	-0.811	0.968	-0.811	-1.051	-1.052	-0.022	-0.869	0.91	-0.869	0	1.03	0.183	1.961	0.183	1.03	0.183	1.962	0.183	-0.847	0.932	-0.847	1.778	0	-1.779	62.37	150.19	-5.22	-5.3	83.95	25.08	199.09	25.06	3.67	-64.41	-64.44	1.95	-52.57
26.01	-2.138	-5.817	0.577	1.349	4.838	-0.038	3.423	-0.516	-3.679	2.715	3.487	6.976	2.1	5.561	1.622	6.394	7.166	10.655	5.779	9.24	5.301	0.772	4.26	-0.615	2.846	-1.093	3.489	-1.387	2.074	-1.865	-4.875	-1.415	-5.354	3.461	-0.478	-3.939	-2.88	-7.84	0.78	1.82	6.52	-0.05	4.61	-0.7	-4.96	3.66	4.7	9.4	2.77
19.15	-0.067	-0.826	-0.031	-0.032	1.302	0.151	0.748	0.151	-0.758	0.036	0.035	1.369	0.219	0.816	0.219	0.794	0.794	2.128	0.977	1.574	0.977	0	1.333	0.183	0.78	0.183	1.334	0.183	0.78	0.183	-1.151	-0.553	-1.151	0.597	0	-0.597	-11.66	-24.7	-5.44	-5.52	75.66	26.16	17.69	26.14	-22.68	6.22	6.13	79.57	37.82
17.9	0	0	0	2.837	0	0.056	0	0.069	0	0	2.837	0	0.056	0	0.069	0	2.837	0	0.056	0	0.069	2.837	0	0.056	0	0.069	-2.837	-2.781	-2.837	-2.767	0.056	0	0.069	-0.056	0.014	0.069	0	0	0	0	0	0	0	0	0	0	0	0	0
18.46	0.696	0.891	-0.019	-0.019	-0.04	0.076	-0.025	0.088	0.194	-0.715	-0.715	-0.736	-0.621	-0.721	-0.608	-0.909	-0.909	-0.931	-0.815	-0.916	-0.803	0	-0.021	0.094	-0.006	0.106	-0.021	0.094	-0.006	0.107	0.116	0.015	0.128	-0.101	0.012	0.113	0.69	0.88	-0.02	-0.02	-0.04	0.07	-0.03	0.09	0.19	-0.71	-0.71	-0.73	-0.61
20.41	0.574	0.077	-0.271	1.055	-0.106	0.551	-0.288	0.555	-0.497	-0.845	0.481	-0.68	-0.023	-0.862	-0.019	-0.348	0.978	-0.183	0.474	-0.365	0.478	1.326	0.165	0.821	-0.017	0.826	-1.161	-0.505	-1.343	-0.501	0.657	-0.182	0.661	-0.839	0.004	0.843	13.13	1.62	-6.2	11.44	-2.43	12.35	-6.59	12.69	-10.44	-19.33	5.22	-15.56	-0.52
17.65	-0.004	0.439	0	0.227	0	0.056	0	0.069	0.443	0.004	0.231	0.004	0.059	0.004	0.073	-0.439	-0.212	-0.439	-0.384	-0.439	-0.37	0.227	0	0.056	0	0.069	-0.227	-0.172	-0.227	-0.158	0.056	0	0.069	-0.056	0.014	0.069	-0.65	13.55	0	9.67	0	4.55	0	6.44	13.67	0.65	9.83	0.65	4.87
17.69	0	0.962	0	0	0	0.056	0	0.069	0.962	0	0	0	0.056	0	0.069	-0.962	-0.962	-0.962	-0.906	-0.962	-0.892	0	0	0.056	0	0.069	0	0.056	0	0.069	0.056	0	0.069	-0.056	0.014	0.069	0	0	0	0	0	0	0	0	0	0	0	0	0
20.27	-0.672	0.802	-0.271	1.044	-0.779	0.551	-0.288	0.555	1.474	0.401	1.716	-0.106	1.223	0.384	1.227	-1.073	0.242	-1.581	-0.251	-1.09	-0.247	1.315	-0.508	0.821	-0.017	0.826	-1.823	-0.493	-1.332	-0.489	1.329	0.491	1.333	-0.839	0.004	0.843	-10.17	10.42	-4.82	18.57	-13.85	9.79	-5.13	9.87	17.46	6.08	25.98	-1.61	18.51
20.4	0.161	0.533	-0.271	0.384	0.409	0.551	-0.288	0.555	0.372	-0.432	0.222	0.248	0.389	-0.45	0.393	-0.804	-0.15	-0.124	0.017	-0.822	0.021	0.655	0.68	0.821	-0.017	0.826	0.026	0.167	-0.672	0.171	0.141	-0.697	0.145	-0.839	0.004	0.843	1.68	5.67	-2.88	2.16	3.8	5.85	-3.06	5.9	3.87	-4.5	1.24	2.27	4.05
22.82	-1.168	-3.193	0.437	-3.113	-4.833	-1.03	-5.499	-4.656	-2.025	1.605	-1.944	-3.665	0.138	-4.331	-3.488	3.63	0.081	-1.64	2.163	-2.306	-1.463	-3.55	-5.27	-1.467	-5.936	-5.094	-1.72	2.083	-2.387	-1.544	3.803	-0.666	0.176	-4.469	-3.626	0.843	-5.44	-14.88	2.04	-14.51	-14.45	-4.47	-25.63	-21.7	-9.44	7.48	-9.06	-10.96	0.6
19.27	-0.067	-0.067	-0.031	-0.032	1.263	0.151	1.172	0.151	0.001	0.036	0.035	1.331	0.219	1.24	0.219	0.035	0.035	1.33	0.218	1.239	0.218	0	1.295	0.183	1.204	0.183	1.295	0.183	1.204	0.183	-1.112	-0.091	-1.112	1.021	0	-1.021	-11.66	-11.45	-5.44	-5.52	76.24	26.16	22.28	26.14	0.09	6.22	6.13	80.3	37.82
20.61	0.284	-2.288	0.139	-0.437	0.992	0.551	4.145	0.555	-2.572	-0.145	-0.721	0.708	0.267	3.861	0.271	2.427	1.851	3.28	2.839	6.433	2.843	-0.576	0.853	0.412	4.006	0.416	1.429	0.988	4.582	0.992	-0.441	3.154	-0.437	3.595	0.004	-3.59	3.02	-24.33	1.06	-4.65	8.05	5.85	29.65	5.9	-27.34	-1.11	-7.66	5.75	2.84
18.5	-0.034	0.939	-0.013	-0.013	0.823	0.131	-0.018	0.133	0.972	0.021	0.021	0.857	0.165	0.015	0.167	-0.951	-0.951	-0.116	-0.807	-0.957	-0.806	0	0.835	0.144	-0.006	0.146	0.836	0.144	-0.005	0.146	-0.692	-0.841	-0.69	-0.15	0.002	0.151	-0.03	0.93	-0.01	-0.01	0.79	0.13	-0.02	0.13	0.96	0.02	0.02	0.82	0.16
19.32	-1.117	-0.669	-0.141	1.714	1.898	-0.952	-0.199	-0.95	0.448	0.976	2.831	3.015	0.165	0.918	0.167	0.528	2.383	2.567	-0.283	0.471	-0.281	1.855	2.039	-0.811	-0.057	-0.809	0.184	-2.666	-1.912	-2.664	-2.85	-2.097	-2.848	0.753	0.002	-0.752	-0.99	-0.6	-0.12	1.53	1.69	-0.85	-0.17	-0.85	0.42	0.89	2.66	2.83	0.16
18.62	-0.034	1.259	-0.019	-0.019	1.762	0.076	-0.025	0.088	1.293	0.015	0.015	1.796	0.109	0.008	0.121	-1.278	-1.278	0.503	-1.183	-1.284	-1.171	0	1.781	0.094	-0.006	0.106	1.781	0.094	-0.006	0.107	-1.687	-1.787	-1.674	-0.101	0.012	0.113	-0.03	1.25	-0.02	-0.02	1.75	0.07	-0.03	0.09	1.28	0.01	0.01	1.78	0.11
20.37	-0.807	-0.06	-0.271	0.129	0.814	0.551	0.928	0.555	0.747	0.537	0.936	1.621	1.358	1.736	1.362	-0.211	0.189	0.874	0.611	0.988	0.615	0.4	1.084	0.821	1.199	0.826	0.685	0.422	0.799	0.426	-0.263	0.115	-0.259	0.378	0.004	-0.374	-14.36	-0.94	-4.82	1.1	14.47	9.79	9.85	9.87	11.66	9.55	8.01	28.84	24.16
19.67	-0.451	-1.509	-0.182	-0.258	0.955	0.369	1.378	0.346	-1.057	0.27	0.193	1.406	0.82	1.83	0.797	1.327	1.251	2.464	1.878	2.887	1.855	-0.076	1.137	0.551	1.56	0.528	1.213	0.627	1.636	0.604	-0.586	0.423	-0.609	1.009	-0.023	-1.032	-0.76	-2.55	-0.31	-0.44	1.61	0.62	2.33	0.58	-1.79	0.46	0.33	2.38	1.38
17.87	0	0	0	2.574	0	0.056	0	0.069	0	0	2.574	0	0.056	0	0.069	0	2.574	0	0.056	0	0.069	2.574	0	0.056	0	0.069	-2.574	-2.518	-2.574	-2.505	0.056	0	0.069	-0.056	0.014	0.069	0	0	0	0	0	0	0	0	0	0	0	0	0
20.96	-0.323	0.618	0.442	0.92	2.107	0.551	2.264	0.555	0.941	0.765	1.243	2.43	0.874	2.587	0.878	-0.176	0.301	1.489	-0.068	1.645	-0.063	0.478	1.665	0.109	1.822	0.113	1.187	-0.369	1.344	-0.365	-1.556	0.157	-1.552	1.713	0.004	-1.709	-0.88	1.53	1.08	2.51	5.76	1.5	6.18	1.52	2.34	1.87	3.4	6.64	2.39
20.18	-0.807	0.822	-0.271	0.338	-0.779	0.551	-0.288	0.555	1.63	0.537	1.145	0.029	1.358	0.519	1.362	-1.093	-0.484	-1.601	-0.272	-1.111	-0.268	0.609	-0.508	0.821	-0.017	0.826	-1.117	0.212	-0.626	0.217	1.329	0.491	1.333	-0.839	0.004	0.843	-28.41	28.93	-9.53	11.89	-27.39	16.78	-10.14	19.51	57.34	18.88	40.3	1.01	41.4
17.74	0	1.41	0	0	0	0.056	0	0.069	1.41	0	0	0	0.056	0	0.069	-1.41	-1.41	-1.41	-1.354	-1.41	-1.34	0	0	0.056	0	0.069	0	0.056	0	0.069	0.056	0	0.069	-0.056	0.014	0.069	0	0	0	0	0	0	0	0	0	0	0	0	0
19.49	-0.424	-1.802	1.546	-0.211	-0.406	0.333	-0.144	0.36	-1.379	1.97	0.213	0.018	0.756	0.279	0.783	3.349	1.591	1.397	2.135	1.658	2.162	-1.757	-1.952	-1.214	-1.691	-1.186	-0.195	0.543	0.066	0.571	0.738	0.261	0.765	-0.477	0.027	0.504	-0.73	-3.1	2.66	-0.36	-0.7	0.57	-0.25	0.62	-2.37	3.39	0.37	0.03	1.3
18.73	-0.034	-0.658	3.274	1.321	-0.04	0.076	-0.025	0.088	-0.625	3.308	1.355	-0.007	0.109	0.008	0.121	3.933	1.98	0.618	0.734	0.633	0.746	-1.953	-3.314	-3.199	-3.299	-3.186	-1.362	-1.246	-1.347	-1.234	0.116	0.015	0.128	-0.101	0.012	0.113	-0.03	-0.67	3.32	1.34	-0.04	0.08	-0.03	0.09	-0.63	3.35	1.37	-0.01	0.11
18.06	0	0	4.278	0	0	0.056	0	0.069	0	4.278	0	0	0.056	0	0.069	4.278	0	0	0.056	0	0.069	-4.278	-4.278	-4.223	-4.278	-4.209	0	0.056	0	0.069	0.056	0	0.069	-0.056	0.014	0.069	0	0	2058.77	0	0	0	0	0	0	2058.77	0	0	0
19.27	-3.122	-4.086	0.85	-0.007	-4.086	-2.85	-4.086	-4.017	-0.964	3.972	3.115	-0.964	0.272	-0.964	-0.894	4.936	4.079	0	1.236	0	0.069	-0.857	-4.936	-3.7	-4.936	-4.866	-4.079	-2.843	-4.079	-4.009	1.236	0	0.069	-1.236	-1.166	0.069	-13.84	-33.11	6.75	-0.06	-33.11	-23.09	-33.11	-32.54	-4.27	17.5	13.81	-4.27	1.21
18.07	0	0	4.375	0	0	0.056	0	0.069	0	4.375	0	0	0.056	0	0.069	4.375	0	0	0.056	0	0.069	-4.375	-4.375	-4.319	-4.375	-4.305	0	0.056	0	0.069	0.056	0	0.069	-0.056	0.014	0.069	0	0	0	0	0	0	0	0	0	0	0	0	0
19.74	-0.451	-1.801	2.86	0.6	-0.446	0.369	-0.187	0.346	-1.349	3.311	1.051	0.005	0.82	0.264	0.797	4.66	2.4	1.354	2.17	1.613	2.147	-2.26	-3.306	-2.491	-3.047	-2.514	-1.046	-0.231	-0.787	-0.254	0.815	0.259	0.792	-0.556	-0.023	0.533	-0.69	-2.74	4.35	0.84	-0.68	0.56	-0.28	0.53	-2.05	5.03	1.47	0.01	1.25
18.58	-0.034	-0.656	3.223	-0.013	-0.033	0.131	-0.018	0.133	-0.622	3.257	0.021	0.001	0.165	0.015	0.167	3.879	0.643	0.623	0.787	0.638	0.789	-3.236	-3.256	-3.092	-3.241	-3.09	-0.02	0.144	-0.005	0.146	0.164	0.015	0.166	-0.15	0.002	0.151	-0.03	-0.65	3.2	-0.01	-0.03	0.13	-0.02	0.13	-0.62	3.24	0.02	0	0.16
19.23	-0.067	-1.315	3.338	-0.032	-0.073	0.151	-0.044	0.151	-1.247	3.405	0.035	-0.006	0.219	0.024	0.219	4.652	1.283	1.241	1.466	1.271	1.466	-3.37	-3.411	-3.187	-3.381	-3.187	-0.041	0.183	-0.012	0.183	0.224	0.03	0.224	-0.195	0	0.195	-16.98	-331.23	206.88	-8.05	-18.15	38.1	-10.94	38.08	-314.25	211.05	8.93	-1.45	55.08
17.77	0	0	1.71	0	0	0.056	0	0.069	0	1.71	0	0	0.056	0	0.069	1.71	0	0	0.056	0	0.069	-1.71	-1.71	-1.654	-1.71	-1.64	0	0.056	0	0.069	0.056	0	0.069	-0.056	0.014	0.069	0	0	0	0	0	0	0	0	0	0	0	0	0
18.53	-0.034	-0.658	2.894	-0.019	-0.04	0.076	-0.025	0.088	-0.625	2.927	0.015	-0.007	0.109	0.008	0.121	3.552	0.639	0.618	0.734	0.633	0.746	-2.912	-2.934	-2.818	-2.919	-2.806	-0.021	0.094	-0.006	0.107	0.116	0.015	0.128	-0.101	0.012	0.113	-0.03	-0.66	2.9	-0.02	-0.04	0.08	-0.03	0.09	-0.63	2.93	0.01	-0.01	0.11
17.98	0	0	3.567	0	0	0.056	0	0.069	0	3.567	0	0	0.056	0	0.069	3.567	0	0	0.056	0	0.069	-3.567	-3.567	-3.511	-3.567	-3.497	0	0.056	0	0.069	0.056	0	0.069	-0.056	0.014	0.069	0	0	0	0	0	0	0	0	0	0	0	0	0
19.55	-2.242	-3.779	0.39	-1.837	-2.538	-2.314	-2.508	-2.314	-1.538	2.632	0.404	-0.296	-0.072	-0.267	-0.072	4.17	1.942	1.241	1.466	1.271	1.466	-2.228	-2.928	-2.704	-2.899	-2.704	-0.701	-0.476	-0.671	-0.476	0.224	0.03	0.224	-0.195	0	0.195	-77.1	-504.1	12.78	-42.31	-338.52	-308.58	-334.57	-308.6	-52.9	63.42	7.81	-10.2	-2.48
17.96	0	0	3.378	0	0	0.056	0	0.069	0	3.378	0	0	0.056	0	0.069	3.378	0	0	0.056	0	0.069	-3.378	-3.378	-3.322	-3.378	-3.308	0	0.056	0	0.069	0.056	0	0.069	-0.056	0.014	0.069	0	0	0	0	0	0	0	0	0	0	0	0	0
19.25	-0.067	-1.315	2.643	0.895	-0.073	0.151	-0.044	0.151	-1.247	2.711	0.963	-0.006	0.219	0.024	0.219	3.958	2.21	1.241	1.466	1.271	1.466	-1.748	-2.717	-2.492	-2.687	-2.492	-0.968	-0.744	-0.939	-0.744	0.224	0.03	0.224	-0.195	0	0.195	-16.98	-331.23	127.16	22.48	-18.15	38.1	-10.94	38.08	-314.25	130.4	24.18	-1.45	55.08
17.88	0	0	0	2.662	0	0.056	0	0.069	0	0	2.662	0	0.056	0	0.069	0	2.662	0	0.056	0	0.069	2.662	0	0.056	0	0.069	-2.662	-2.606	-2.662	-2.593	0.056	0	0.069	-0.056	0.014	0.069	0	0	0	0	0	0	0	0	0	0	0	0	0
19.24	-0.067	-1.315	3.434	-0.032	-0.073	0.151	-0.044	0.151	-1.247	3.502	0.035	-0.006	0.219	0.024	0.219	4.749	1.283	1.241	1.466	1.271	1.466	-3.466	-3.508	-3.283	-3.478	-3.283	-0.041	0.183	-0.012	0.183	0.224	0.03	0.224	-0.195	0	0.195	-16.98	-331.23	172.64	-8.05	-18.15	38.1	-10.94	38.08	-314.25	176.03	8.93	-1.45	55.08
18.48	-4.266	-4.266	-0.44	-4.266	-4.266	-4.21	-4.266	-4.197	0	3.826	0	0	0.056	0	0.069	3.826	0	0	0.056	0	0.069	-3.826	-3.826	-3.77	-3.826	-3.756	0	0.056	0	0.069	0.056	0	0.069	-0.056	0.014	0.069	0	0	0	0	0	0	0	0	0	0	0	0	0
17.92	0	0	3.09	0	0	0.056	0	0.069	0	3.09	0	0	0.056	0	0.069	3.09	0	0	0.056	0	0.069	-3.09	-3.09	-3.034	-3.09	-3.02	0	0.056	0	0.069	0.056	0	0.069	-0.056	0.014	0.069	0	0	0	0	0	0	0	0	0	0	0	0	0
18.37	0	0	3.621	3.461	0	0.056	0	0.069	0	3.621	3.461	0	0.056	0	0.069	3.621	3.461	0	0.056	0	0.069	-0.16	-3.621	-3.565	-3.621	-3.551	-3.461	-3.405	-3.461	-3.391	0.056	0	0.069	-0.056	0.014	0.069	0	0	0	0	0	0	0	0	0	0	0	0	0
20.8	-3.457	-4.401	0.676	-0.45	-3.428	-2.099	-2.937	-2.095	-0.944	4.132	3.006	0.029	1.358	0.519	1.362	5.076	3.951	0.973	2.302	1.463	2.306	-1.126	-4.104	-2.774	-3.613	-2.77	-2.978	-1.648	-2.487	-1.644	1.329	0.491	1.333	-0.839	0.004	0.843	-96.82	-54.27	16.11	-12.61	-96.01	-53.74	-82.27	-58.67	-11.92	108.3	96.38	0.92	38.82
18.46	-0.034	-0.658	-0.019	-0.019	1.18	0.076	0.954	0.088	-0.625	0.015	0.015	1.214	0.109	0.988	0.121	0.64	0.639	1.839	0.734	1.612	0.746	0	1.199	0.094	0.973	0.106	1.199	0.094	0.973	0.107	-1.105	-0.226	-1.093	0.879	0.012	-0.866	-0.03	-0.65	-0.02	-0.02	1.17	0.07	0.9	0.09	-0.62	0.01	0.01	1.2	0.11
19.14	-0.067	-1.315	-0.031	-0.032	0.946	0.151	1.524	0.151	-1.247	0.036	0.035	1.013	0.219	1.591	0.219	1.283	1.283	2.261	1.466	2.838	1.466	0	0.977	0.183	1.555	0.183	0.978	0.183	1.556	0.183	-0.795	0.578	-0.795	1.372	0	-1.372	-16.98	-331.23	-7.92	-8.05	92.22	38.1	208.86	38.08	-314.25	9.05	8.93	98.79	55.08
20.27	0.546	1.05	-0.271	-0.437	-0.779	0.551	-0.288	0.555	0.504	-0.817	-0.983	-1.325	0.004	-0.834	0.008	-1.321	-1.487	-1.829	-0.5	-1.338	-0.495	-0.166	-0.508	0.821	-0.017	0.826	-0.342	0.988	0.149	0.992	1.329	0.491	1.333	-0.839	0.004	0.843	10.1	29.17	-7.52	-12.14	-21.63	14.22	-8	15.41	9.32	-15.11	-18.19	-24.51	0.08
19.51	-0.161	-0.519	-0.182	-0.258	-0.137	0.369	-0.187	0.346	-0.358	-0.02	-0.097	0.024	0.53	-0.026	0.507	0.337	0.261	0.382	0.888	0.332	0.865	-0.076	0.044	0.551	-0.006	0.528	0.121	0.627	0.071	0.604	0.506	-0.05	0.483	-0.556	-0.023	0.533	-0.25	-0.79	-0.28	-0.39	-0.21	0.56	-0.28	0.53	-0.54	-0.03	-0.15	0.04	0.81
20.29	0.738	0.449	-0.271	0.091	-0.779	0.551	-0.288	0.555	-0.288	-1.008	-0.646	-1.516	-0.187	-1.026	-0.183	-0.72	-0.358	-1.228	0.101	-0.737	0.106	0.362	-0.508	0.821	-0.017	0.826	-0.87	0.459	-0.379	0.463	1.329	0.491	1.333	-0.839	0.004	0.843	15.18	7.07	-6.54	2.2	-18.8	12.85	-6.96	13.39	-4.21	-20.75	-13.3	-31.2	-3.75
19.42	-0.067	-1.315	-0.031	-0.032	2.22	0.151	2.812	0.151	-1.247	0.036	0.035	2.287	0.219	2.879	0.219	1.283	1.283	3.535	1.466	4.127	1.466	0	2.252	0.183	2.844	0.183	2.252	0.183	2.844	0.183	-2.069	0.592	-2.069	2.661	0	-2.661	-16.98	-331.23	-7.92	-8.05	149.22	38.1	187.17	38.08	-314.25	9.05	8.93	153.75	55.08
19.74	-0.238	-0.445	-0.182	0.944	-0.446	0.369	0.953	0.346	-0.207	0.056	1.182	-0.209	0.607	1.191	0.584	0.263	1.389	-0.001	0.814	1.398	0.791	1.126	-0.265	0.551	1.135	0.528	-1.39	-0.575	0.009	-0.598	0.815	1.399	0.792	0.584	-0.023	-0.607	-0.37	-0.69	-0.28	1.45	-0.69	0.57	1.24	0.53	-0.32	0.09	1.82	-0.32	0.93
20.3	-1.065	-3.192	-2.3	-2.466	-2.808	-1.479	-2.317	-1.474	-2.126	-1.235	-1.401	-1.743	-0.413	-1.252	-0.409	0.892	0.726	0.384	1.713	0.874	1.717	-0.166	-0.508	0.821	-0.017	0.826	-0.342	0.988	0.149	0.992	1.329	0.491	1.333	-0.839	0.004	0.843	-22.19	-74.6	-53.76	-57.64	-65.63	-32.98	-54.16	-34.46	-48.83	-28.35	-32.17	-40.01	-9.07
17.76	0	1.571	0	0	0	0.056	0	0.069	1.571	0	0	0	0.056	0	0.069	-1.571	-1.571	-1.571	-1.516	-1.571	-1.502	0	0	0.056	0	0.069	0	0.056	0	0.069	0.056	0	0.069	-0.056	0.014	0.069	0	0	0	0	0	0	0	0	0	0	0	0	0
17.71	0	1.181	0	0	0	0.056	0	0.069	1.181	0	0	0	0.056	0	0.069	-1.181	-1.181	-1.181	-1.125	-1.181	-1.112	0	0	0.056	0	0.069	0	0.056	0	0.069	0.056	0	0.069	-0.056	0.014	0.069	0	0	0	0	0	0	0	0	0	0	0	0	0
20.28	0.444	1.258	-0.271	-0.437	-0.779	0.551	-0.288	0.555	0.815	-0.714	-0.881	-1.222	0.107	-0.732	0.111	-1.529	-1.696	-2.037	-0.708	-1.547	-0.704	-0.166	-0.508	0.821	-0.017	0.826	-0.342	0.988	0.149	0.992	1.329	0.491	1.333	-0.839	0.004	0.843	5.55	29.3	-6.54	-10.55	-18.8	12.85	-6.96	13.39	10.1	-8.95	-11.03	-15.3	1.33
21.92	-0.754	0.569	-3.161	-2.152	-0.959	-2.34	0.858	-2.336	1.323	-2.408	-1.398	-0.206	-1.586	1.612	-1.582	-3.731	-2.721	-1.529	-2.909	0.289	-2.905	1.009	2.202	0.821	4.019	0.826	1.192	-0.188	3.01	-0.184	-1.38	1.817	-1.376	3.198	0.004	-3.194	-8.01	6.05	-33.61	-10.28	-7.76	-24.87	6.49	-24.83	14.06	-25.6	-6.68	-1.67	-16.86
19.18	2.029	1.823	0.862	2.609	0.576	0.131	-0.018	0.133	-0.205	-1.167	0.58	-1.453	-1.897	-2.047	-1.896	-0.961	0.786	-1.248	-1.692	-1.842	-1.69	1.747	-0.286	-0.731	-0.88	-0.729	-2.033	-2.477	-2.627	-2.476	-0.444	-0.594	-0.443	-0.15	0.002	0.151	1.96	1.77	0.81	2.53	0.56	0.13	-0.02	0.13	-0.2	-1.1	0.56	-1.41	-1.84
19.23	0.442	1.041	-0.031	-0.032	0.454	0.151	-0.044	0.151	0.599	-0.474	-0.474	0.011	-0.291	-0.486	-0.291	-1.073	-1.073	-0.588	-0.89	-1.085	-0.89	0	0.485	0.183	-0.012	0.183	0.486	0.183	-0.012	0.183	-0.303	-0.497	-0.303	-0.195	0	0.195	12.75	45.78	-5.22	-5.3	12.9	25.08	-7.23	25.06	14.59	-13.66	-13.67	0.23	-8.39
18.46	-0.034	1.577	-0.019	-0.019	-0.04	0.076	-0.025	0.088	1.611	0.015	0.015	-0.007	0.109	0.008	0.121	-1.596	-1.596	-1.617	-1.501	-1.602	-1.489	0	-0.021	0.094	-0.006	0.106	-0.021	0.094	-0.006	0.107	0.116	0.015	0.128	-0.101	0.012	0.113	-0.03	1.56	-0.02	-0.02	-0.04	0.07	-0.03	0.09	1.6	0.01	0.01	-0.01	0.11
18.52	0.467	1.639	-0.019	-0.019	-0.04	0.076	-0.025	0.088	1.171	-0.486	-0.486	-0.508	-0.392	-0.493	-0.38	-1.658	-1.658	-1.679	-1.563	-1.664	-1.551	0	-0.021	0.094	-0.006	0.106	-0.021	0.094	-0.006	0.107	0.116	0.015	0.128	-0.101	0.012	0.113	0.46	1.62	-0.02	-0.02	-0.04	0.07	-0.03	0.09	1.16	-0.48	-0.48	-0.5	-0.39
18.48	-0.034	0.631	-0.013	-0.013	-0.033	0.131	1.041	0.133	0.665	0.021	0.021	0.001	0.165	1.075	0.167	-0.643	-0.644	-0.664	-0.5	0.41	-0.498	0	-0.02	0.144	1.054	0.146	-0.02	0.144	1.054	0.146	0.164	1.074	0.166	0.91	0.002	-0.908	-0.03	0.62	-0.01	-0.01	-0.03	0.13	0.97	0.13	0.66	0.02	0.02	0	0.16
19.28	0.75	0.852	-0.031	-0.032	-0.073	0.151	0.786	0.151	0.102	-0.782	-0.782	-0.823	-0.599	0.036	-0.599	-0.884	-0.884	-0.926	-0.701	-0.066	-0.701	0	-0.042	0.183	0.818	0.183	-0.041	0.183	0.818	0.183	0.224	0.859	0.224	0.635	0	-0.635	30.13	63.38	-5.22	-5.3	-12.14	25.08	17.82	25.06	3.7	-31.39	-31.41	-33.07	-24.06
27.06	3.988	4.63	3.185	4.269	2.801	0.975	2.239	2.048	0.642	-0.803	0.28	-1.187	-3.014	-1.75	-1.94	-1.445	-0.362	-1.829	-3.656	-2.392	-2.582	1.084	-0.384	-2.211	-0.946	-1.137	-1.468	-3.294	-2.03	-2.22	-1.826	-0.562	-0.753	1.264	1.074	-0.19	50.79	58.97	40.56	54.36	20.36	12.41	16.48	17.96	8.18	-10.23	3.57	-8.63	-38.38
18.94	0.393	1.259	-0.013	2.185	1.909	0.131	-0.018	0.133	0.867	-0.405	1.792	1.516	-0.261	-0.411	-0.26	-1.272	0.926	0.649	-1.128	-1.278	-1.126	2.197	1.921	0.144	-0.006	0.146	-0.276	-2.053	-2.203	-2.052	-1.777	-1.927	-1.776	-0.15	0.002	0.151	0.39	1.24	-0.01	2.15	1.88	0.13	-0.02	0.13	0.85	-0.4	1.77	1.49	-0.26
20	-0.807	-0.05	-0.271	-0.437	-0.779	0.551	-0.288	0.555	0.757	0.537	0.37	0.029	1.358	0.519	1.362	-0.221	-0.387	-0.729	0.601	-0.238	0.605	-0.166	-0.508	0.821	-0.017	0.826	-0.342	0.988	0.149	0.992	1.329	0.491	1.333	-0.839	0.004	0.843	-22.43	-1.08	-7.52	-12.14	-21.63	14.22	-8	15.41	16.39	14.9	10.29	0.8	35.08
18.37	-0.034	0.677	-0.013	-0.013	-0.033	0.131	-0.018	0.133	0.71	0.021	0.021	0.001	0.165	0.015	0.167	-0.689	-0.69	-0.71	-0.545	-0.695	-0.544	0	-0.02	0.144	-0.006	0.146	-0.02	0.144	-0.005	0.146	0.164	0.015	0.166	-0.15	0.002	0.151	-0.03	0.67	-0.01	-0.01	-0.03	0.13	-0.02	0.13	0.7	0.02	0.02	0	0.16
21.24	0.93	1.22	-0.271	1.389	2.649	0.551	2.592	0.555	0.29	-1.201	0.459	1.719	-0.379	1.662	-0.375	-1.491	0.169	1.429	-0.67	1.371	-0.666	1.66	2.92	0.821	2.863	0.826	1.26	-0.838	1.203	-0.834	-2.098	-0.057	-2.094	2.041	0.004	-2.037	5.44	6.72	-1.59	7.96	15.5	3.22	14.74	3.25	1.6	-7.03	2.63	10.06	-2.22
19.02	-0.067	0.221	-0.031	-0.032	-0.073	0.151	-0.044	0.151	0.288	0.036	0.035	-0.006	0.219	0.024	0.219	-0.252	-0.253	-0.294	-0.069	-0.264	-0.07	0	-0.042	0.183	-0.012	0.183	-0.041	0.183	-0.012	0.183	0.224	0.03	0.224	-0.195	0	0.195	-11.66	16.35	-5.44	-5.52	-12.67	26.16	-7.54	26.14	21.34	6.22	6.13	-1.01	37.82
18.44	-0.034	0.862	-0.019	-0.019	0.52	0.076	-0.025	0.088	0.896	0.015	0.015	0.554	0.109	0.008	0.121	-0.881	-0.881	-0.342	-0.787	-0.888	-0.775	0	0.539	0.094	-0.006	0.106	0.539	0.094	-0.006	0.107	-0.445	-0.545	-0.433	-0.101	0.012	0.113	-0.03	0.86	-0.02	-0.02	0.52	0.07	-0.03	0.09	0.89	0.01	0.01	0.55	0.11
24.94	-0.101	-2.751	-1.032	-0.407	-2.156	-0.749	-6.742	-1.256	-2.65	-0.932	-0.307	-2.055	-0.649	-6.642	-1.155	1.718	2.343	0.595	2.001	-3.992	1.494	0.625	-1.124	0.283	-5.71	-0.224	-1.749	-0.342	-6.335	-0.849	1.407	-4.586	0.9	-5.993	-0.507	5.486	-0.65	-11.89	-4.73	-2.65	-12.59	-4.88	-43.88	-5.42	-11.46	-4.27	-2	-12	-4.22
17.86	2.497	0	0	0	0	0.056	0	0.069	-2.497	-2.497	-2.497	-2.497	-2.442	-2.497	-2.428	0	0	0	0.056	0	0.069	0	0	0.056	0	0.069	0	0.056	0	0.069	0.056	0	0.069	-0.056	0.014	0.069	0	0	0	0	0	0	0	0	0	0	0	0	0
18.04	0	0	0	0	1.151	0.056	2.946	0.069	0	0	0	1.151	0.056	2.946	0.069	0	0	1.151	0.056	2.946	0.069	0	1.151	0.056	2.946	0.069	1.151	0.056	2.946	0.069	-1.095	1.795	-1.081	2.89	0.014	-2.876	0	0	0	0	0	0	0	0	0	0	0	0	0
18.39	-0.034	-0.656	-0.013	-0.013	1.471	0.131	-0.018	0.133	-0.622	0.021	0.021	1.504	0.165	0.015	0.167	0.644	0.643	2.127	0.787	0.638	0.789	0	1.483	0.144	-0.006	0.146	1.484	0.144	-0.005	0.146	-1.339	-1.489	-1.338	-0.15	0.002	0.151	-0.03	-0.65	-0.01	-0.01	1.45	0.13	-0.02	0.13	-0.61	0.02	0.02	1.48	0.16
17.86	0	0	0	0	2.557	0.056	0	0.069	0	0	0	2.557	0.056	0	0.069	0	0	2.557	0.056	0	0.069	0	2.557	0.056	0	0.069	2.557	0.056	0	0.069	-2.501	-2.557	-2.487	-0.056	0.014	0.069	0	0	0	0	0	0	0	0	0	0	0	0	0
18.44	-0.034	0.648	-0.019	-0.019	0.739	0.076	-0.025	0.088	0.682	0.015	0.015	0.772	0.109	0.008	0.121	-0.667	-0.667	0.091	-0.573	-0.673	-0.561	0	0.758	0.094	-0.006	0.106	0.758	0.094	-0.006	0.107	-0.663	-0.764	-0.651	-0.101	0.012	0.113	-0.03	0.64	-0.02	-0.02	0.72	0.07	-0.03	0.09	0.68	0.01	0.01	0.76	0.11
20.74	1.145	2.15	-0.271	2.052	-0.779	0.551	-0.288	0.555	1.005	-1.416	0.907	-1.924	-0.595	-1.433	-0.591	-2.421	-0.098	-2.929	-1.6	-2.438	-1.596	2.323	-0.508	0.821	-0.017	0.826	-2.831	-1.502	-2.341	-1.498	1.329	0.491	1.333	-0.839	0.004	0.843	12.1	29.69	-4.82	25.45	-13.85	9.79	-5.13	9.87	9.56	-14.96	8.18	-20.32	-6.28
20.21	-1.648	-3.819	0.113	-1.968	-2.31	-0.98	-1.819	-0.976	-2.171	1.761	-0.32	-0.662	0.668	-0.171	0.672	3.932	1.851	1.51	2.839	2	2.843	-2.081	-2.422	-1.093	-1.932	-1.089	-0.342	0.988	0.149	0.992	1.329	0.491	1.333	-0.839	0.004	0.843	-24.53	-106.08	2.82	-54.66	-64.15	-25.33	-50.53	-27.12	-32.32	25.37	-4.76	-9.85	9.72
22.71	1.76	3.699	1.09	2.753	2.773	-0.38	3.143	-0.376	1.939	-0.67	0.994	1.013	-2.139	1.384	-2.135	-2.609	-0.946	-0.926	-4.079	-0.556	-4.075	1.664	1.683	-1.469	2.054	-1.465	0.02	-3.133	0.39	-3.129	-3.153	0.37	-3.149	3.523	0.004	-3.519	6.68	14.05	4.14	10.46	10.53	-1.44	11.94	-1.43	12.02	-4.15	6.16	6.28	-13.26
18.95	-0.418	-0.857	-0.169	-0.245	0.352	0.293	1.375	0.282	-0.44	0.248	0.172	0.77	0.711	1.793	0.7	0.688	0.612	1.209	1.151	2.233	1.14	-0.076	0.521	0.462	1.544	0.451	0.597	0.539	1.621	0.528	-0.059	1.023	-0.07	1.082	-0.011	-1.093	-0.25	-0.52	-0.1	-0.15	0.21	0.18	0.83	0.17	-0.26	0.15	0.1	0.46	0.43
18.59	-0.034	0.148	-0.013	-0.013	-0.033	0.131	2.491	0.133	0.182	0.021	0.021	0.001	0.165	2.525	0.167	-0.161	-0.161	-0.181	-0.017	2.343	-0.016	0	-0.02	0.144	2.504	0.146	-0.02	0.144	2.504	0.146	0.164	2.524	0.166	2.36	0.002	-2.358	-0.03	0.15	-0.01	-0.01	-0.03	0.13	2.46	0.13	0.18	0.02	0.02	0	0.16
17.71	0	1.152	0	0	0	0.056	0	0.069	1.152	0	0	0	0.056	0	0.069	-1.152	-1.152	-1.152	-1.097	-1.152	-1.083	0	0	0.056	0	0.069	0	0.056	0	0.069	0.056	0	0.069	-0.056	0.014	0.069	0	0	0	0	0	0	0	0	0	0	0	0	0
20.42	-0.18	0.448	-0.271	-0.437	0.374	0.551	1.18	0.555	0.628	-0.091	-0.257	0.554	0.731	1.36	0.735	-0.719	-0.885	-0.074	0.103	0.732	0.107	-0.166	0.645	0.821	1.451	0.826	0.811	0.988	1.617	0.992	0.176	0.806	0.181	0.63	0.004	-0.626	-3.21	5.08	-4.82	-7.77	4.02	9.79	20.99	9.87	7.13	-1.61	-4.57	5.96	13
20.28	-1.708	-1.888	-1.171	-0.306	-0.153	-0.35	-1.189	-0.346	-0.18	0.537	1.402	1.555	1.358	0.519	1.362	0.717	1.582	1.735	1.538	0.699	1.542	0.865	1.018	0.821	-0.017	0.826	0.153	-0.044	-0.883	-0.04	-0.197	-1.035	-0.192	-0.839	0.004	0.843	-8.97	-9.65	-6.15	-1.61	-0.67	-1.84	-6.25	-1.82	-1.72	5.7	14.9	9.71	14.44
28.34	0.998	1.544	0.258	2.516	-2.093	1.11	0.06	-2.639	0.545	-0.74	1.518	-3.091	0.111	-0.939	-3.638	-1.285	0.972	-3.636	-0.434	-1.484	-4.183	2.258	-2.351	0.851	-0.199	-2.898	-4.609	-1.406	-2.456	-5.155	3.202	2.152	-0.547	-1.05	-3.749	-2.699	4.84	7.49	1.14	10.71	-10.15	5.38	0.25	-12.81	2.65	-3.27	6.46	-15	0.54
24.91	-2.014	-9.867	-3.269	1.259	-2.338	-1.247	-7.382	-0.708	-7.853	-1.255	3.273	-0.324	0.766	-5.368	1.306	6.598	11.126	7.529	8.62	2.485	9.159	4.528	0.931	2.021	-4.113	2.561	-3.597	-2.507	-8.641	-1.967	1.09	-5.044	1.63	-6.135	0.54	6.674	-28.49	-139.62	-28.18	17.82	-29.34	-16.58	-61.49	-10.01	-111.13	-10.82	46.32	-4.07	10.19
24.9	-0.699	0.673	-0.093	-1.677	-3.548	-1.061	-4.438	-4.147	1.372	0.606	-0.978	-2.849	-0.362	-3.739	-3.448	-0.766	-2.35	-4.221	-1.735	-5.112	-4.82	-1.584	-3.455	-0.968	-4.346	-4.054	-1.871	0.616	-2.761	-2.47	2.487	-0.89	-0.599	-3.377	-3.086	0.291	-5.08	4.9	-0.67	-12.19	-25.8	-7.56	-29.63	-13.55	9.98	4.41	-7.11	-20.71	-2.58
19.15	2.515	0.316	-0.169	-0.245	-0.413	0.293	-0.169	0.282	-2.199	-2.684	-2.761	-2.929	-2.222	-2.684	-2.233	-0.485	-0.561	-0.73	-0.023	-0.485	-0.034	-0.076	-0.244	0.462	0	0.451	-0.168	0.539	0.076	0.528	0.707	0.244	0.696	-0.462	-0.011	0.451	1.51	0.19	-0.1	-0.15	-0.25	0.18	-0.1	0.17	-1.32	-1.61	-1.66	-1.76	-1.34
19.64	-0.451	0.322	-0.182	-0.258	-0.446	0.369	0.701	0.346	0.773	0.27	0.193	0.005	0.82	1.152	0.797	-0.503	-0.58	-0.768	0.047	0.379	0.024	-0.076	-0.265	0.551	0.882	0.528	-0.188	0.627	0.959	0.604	0.815	1.147	0.792	0.332	-0.023	-0.355	-0.69	0.5	-0.28	-0.4	-0.69	0.57	0.96	0.53	1.19	0.41	0.3	0.01	1.26
20.75	0	-0.168	0.214	-0.437	2.457	0.551	2.053	0.555	-0.168	0.214	-0.437	2.457	0.55	2.052	0.554	0.382	-0.269	2.625	0.719	2.221	0.723	-0.651	2.243	0.337	1.839	0.341	2.894	0.988	2.49	0.992	-1.907	-0.405	-1.903	1.502	0.004	-1.498	0.01	-4.06	2.46	-10.55	29.71	12.85	15.3	13.39	-4.07	2.45	-10.56	29.7	12.84
20.68	1.272	3.132	-0.271	-0.437	0.118	0.551	-0.288	0.555	1.86	-1.543	-1.709	-1.155	-0.722	-1.56	-0.718	-3.403	-3.569	-3.014	-2.581	-3.42	-2.577	-0.166	0.389	0.821	-0.017	0.826	0.555	0.988	0.149	0.992	0.433	-0.406	0.437	-0.839	0.004	0.843	9.75	36.73	-4.82	-7.77	0.83	9.79	-5.13	9.87	12.79	-11.82	-13.09	-6.24	-5.53
21.51	3.124	6.178	-0.271	2.104	0.131	0.551	-0.288	0.555	3.054	-3.395	-1.02	-2.992	-2.573	-3.412	-2.569	-6.449	-4.074	-6.046	-5.627	-6.466	-5.623	2.374	0.402	0.821	-0.017	0.826	-1.972	-1.553	-2.392	-1.549	0.419	-0.419	0.423	-0.839	0.004	0.843	51.46	138.82	-6.09	22.54	2.95	12.19	-6.47	12.46	50.32	-55.93	-10	-49.3	-42.05
27.18	-0.816	-0.959	0	-2.849	-2.656	-1.25	-3.467	-1.733	-0.143	0.816	-2.032	-1.84	-0.434	-2.651	-0.917	0.959	-1.889	-1.697	-0.29	-2.508	-0.773	-2.849	-2.656	-1.25	-3.467	-1.733	0.192	1.599	-0.618	1.116	1.407	-0.811	0.923	-2.217	-0.483	1.734	-9.47	-13.58	0	-21.93	-37.59	-17.68	-34.83	-24.52	-1.66	9.47	-14.62	-21.34	-5.03
20.24	-0.807	-2.288	-0.271	-0.057	1.381	0.551	1.587	0.555	-1.481	0.537	0.75	2.188	1.358	2.395	1.362	2.017	2.231	3.669	2.839	3.875	2.843	0.214	1.652	0.821	1.858	0.826	1.438	0.608	1.644	0.612	-0.83	0.206	-0.826	1.037	0.004	-1.033	-19.49	-55.24	-6.54	-0.69	30.93	12.85	38.31	13.39	-35.75	12.95	8.99	49.01	31.69
19.75	-0.067	1.081	1.849	-0.032	1.646	0.151	2.078	0.151	1.148	1.917	0.035	1.713	0.219	2.146	0.219	0.768	-1.113	0.565	-0.93	0.998	-0.93	-1.881	-0.203	-1.698	0.229	-1.698	1.678	0.183	2.11	0.183	-1.494	0.433	-1.495	1.927	0	-1.927	-11.66	47.25	223.53	-5.52	85.31	26.16	133.22	26.14	50.19	231.68	6.13	88.81	37.82
20.12	-0.433	0.269	-0.271	-0.437	-0.779	0.551	0.118	0.555	0.702	0.162	-0.004	-0.346	0.983	0.551	0.987	-0.54	-0.706	-1.048	0.281	-0.151	0.286	-0.166	-0.508	0.821	0.389	0.826	-0.342	0.988	0.555	0.992	1.329	0.897	1.333	-0.432	0.004	0.436	-4.5	2.75	-4.82	-7.77	-13.85	9.79	1.22	9.87	5.61	1.68	-0.05	-3.6	10.23
20.07	-0.807	0.003	-0.271	-0.437	-0.169	0.551	-0.288	0.555	0.811	0.537	0.37	0.638	1.358	0.519	1.362	-0.274	-0.441	-0.173	0.547	-0.292	0.551	-0.166	0.101	0.821	-0.017	0.826	0.268	0.988	0.149	0.992	0.72	-0.119	0.724	-0.839	0.004	0.843	-19.49	0.07	-6.54	-10.55	-4.07	12.85	-6.96	13.39	17.11	12.95	8.94	15.32	31.69
18.54	-0.034	-0.656	0.96	1.912	-0.033	0.131	-0.018	0.133	-0.622	0.994	1.946	0.001	0.165	0.015	0.167	1.616	2.568	0.623	0.787	0.638	0.789	0.952	-0.993	-0.829	-0.978	-0.827	-1.945	-1.781	-1.93	-1.779	0.164	0.015	0.166	-0.15	0.002	0.151	-0.03	-0.65	0.91	1.9	-0.03	0.13	-0.02	0.13	-0.62	0.94	1.93	0	0.16
20.95	1.216	1.896	0.303	2.777	-0.008	0.551	-0.288	0.555	0.68	-0.914	1.561	-1.224	-0.666	-1.504	-0.662	-1.593	0.881	-1.904	-1.345	-2.184	-1.341	2.475	-0.31	0.248	-0.591	0.252	-2.785	-2.227	-3.065	-2.222	0.558	-0.28	0.563	-0.839	0.004	0.843	12.93	12.33	2.01	16.46	-0.08	5.85	-3.06	5.9	4.42	-6.06	9.25	-13.01	-7.08
19.1	-1.145	-1.872	-0.896	-0.736	-0.456	-0.434	1.375	-0.445	-0.727	0.248	0.409	0.689	0.711	2.52	0.7	0.975	1.136	1.416	1.438	3.246	1.427	0.16	0.441	0.462	2.271	0.451	0.28	0.302	2.111	0.291	0.022	1.83	0.011	1.809	-0.011	-1.82	-0.6	-0.99	-0.47	-0.39	-0.24	-0.23	0.72	-0.23	-0.38	0.13	0.22	0.36	0.37
20.69	1.247	1.708	-0.271	-0.437	0.943	0.551	0.42	0.555	0.461	-1.518	-1.684	-0.304	-0.697	-0.828	-0.693	-1.979	-2.145	-0.765	-1.158	-1.288	-1.153	-0.166	1.214	0.821	0.691	0.826	1.38	0.988	0.857	0.992	-0.393	-0.523	-0.388	-0.131	0.004	0.135	13.26	12.66	-2.88	-4.65	10.03	5.85	2.45	5.9	3.42	-16.14	-17.91	-3.23	-7.41
18.58	-0.034	-0.656	-0.013	-0.013	0.656	0.131	2.534	0.133	-0.622	0.021	0.021	0.69	0.165	2.568	0.167	0.644	0.643	1.312	0.787	3.191	0.789	0	0.669	0.144	2.547	0.146	0.669	0.144	2.547	0.146	-0.525	1.878	-0.523	2.403	0.002	-2.402	-0.03	-0.65	-0.01	-0.01	0.65	0.13	2.5	0.13	-0.61	0.02	0.02	0.68	0.16
19.17	-0.067	-1.315	-0.031	-0.032	0.912	0.151	1.866	0.151	-1.247	0.036	0.035	0.979	0.219	1.934	0.219	1.283	1.283	2.226	1.466	3.181	1.466	0	0.943	0.183	1.898	0.183	0.944	0.183	1.898	0.183	-0.761	0.954	-0.761	1.715	0	-1.715	-16.98	-331.23	-7.92	-8.05	84.57	38.1	151.64	38.08	-314.25	9.05	8.93	90.82	55.08
20.82	-0.807	1.105	1.281	1.073	1.346	0.551	0.78	0.555	1.912	2.089	1.88	2.154	1.358	1.588	1.362	0.176	-0.032	0.241	-0.554	-0.325	-0.55	-0.209	0.065	-0.731	-0.501	-0.726	0.274	-0.522	-0.292	-0.518	-0.796	-0.566	-0.791	0.23	0.004	-0.226	-19.49	18.48	30.93	19.53	32.5	12.85	5.93	13.39	31.99	50.42	34.24	51.99	31.69
18.05	0	0	0	0	1.197	0.056	3.054	0.069	0	0	0	1.197	0.056	3.054	0.069	0	0	1.197	0.056	3.054	0.069	0	1.197	0.056	3.054	0.069	1.197	0.056	3.054	0.069	-1.142	1.856	-1.128	2.998	0.014	-2.984	0	0	0	0	0	0	0	0	0	0	0	0	0
19.83	-2.514	-1.406	-2.478	-2.478	0.161	-2.295	-1.18	-2.295	1.108	0.036	0.035	2.675	0.219	1.334	0.219	-1.072	-1.073	1.566	-0.89	0.226	-0.89	0	2.639	0.183	1.298	0.183	2.639	0.183	1.298	0.183	-2.456	-1.341	-2.456	1.115	0	-1.115	-179.81	-84.15	-177.24	-177.28	6.18	-164.18	-20.7	-164.18	101.2	5.96	5.88	117.42	36.26
20.12	0.309	2.799	-0.797	-0.887	-1.082	-0.344	-0.821	-0.316	2.491	-1.105	-1.196	-1.39	-0.652	-1.129	-0.625	-3.596	-3.686	-3.881	-3.143	-3.62	-3.115	-0.09	-0.285	0.453	-0.024	0.481	-0.195	0.543	0.066	0.571	0.738	0.261	0.765	-0.477	0.027	0.504	0.41	3.61	-1.05	-1.17	-1.42	-0.45	-1.08	-0.42	3.41	-1.55	-1.68	-1.95	-0.92
20.82	2.23	1.127	0.316	1.771	-0.372	0.551	-0.288	0.555	-1.103	-1.914	-0.459	-2.602	-1.68	-2.518	-1.676	-0.81	0.644	-1.499	-0.576	-1.415	-0.572	1.454	-0.689	0.234	-0.605	0.238	-2.143	-1.22	-2.059	-1.216	0.923	0.084	0.927	-0.839	0.004	0.843	15.5	7.83	1.6	10.05	-2.06	3.83	-2	3.85	-7.67	-9.68	-2.61	-14.4	-11.67
19.69	-1.23	-1.84	-0.436	-1.194	-0.082	-1.011	2.649	-1.011	-0.611	0.794	0.035	1.147	0.219	3.878	0.219	1.404	0.646	1.758	0.829	4.489	0.829	-0.758	0.354	-0.575	3.085	-0.575	1.112	0.183	3.843	0.183	-0.928	2.731	-0.929	3.66	0	-3.66	-2.21	-3.31	-0.76	-2.15	-0.13	-1.82	4.76	-1.82	-1.3	1.62	0.08	2.07	0.46
23.58	1.328	1.858	3.508	2.816	4.588	3.081	0.136	3.824	0.529	2.18	1.487	3.26	1.752	-1.192	2.496	1.651	0.958	2.73	1.223	-1.721	1.967	-0.693	1.079	-0.428	-3.372	0.316	1.772	0.265	-2.68	1.008	-1.507	-4.452	-0.764	-2.944	0.744	3.688	1.47	1.76	3.88	3.11	5.07	3.4	0.14	4.22	0.5	2.41	1.64	3.6	1.94
17.81	0	2.018	0	0	0	0.056	0	0.069	2.018	0	0	0	0.056	0	0.069	-2.018	-2.018	-2.018	-1.963	-2.018	-1.949	0	0	0.056	0	0.069	0	0.056	0	0.069	0.056	0	0.069	-0.056	0.014	0.069	0	0	0	0	0	0	0	0	0	0	0	0	0
17.75	0	1.499	0	0	0	0.056	0	0.069	1.499	0	0	0	0.056	0	0.069	-1.499	-1.499	-1.499	-1.443	-1.499	-1.429	0	0	0.056	0	0.069	0	0.056	0	0.069	0.056	0	0.069	-0.056	0.014	0.069	0	0	0	0	0	0	0	0	0	0	0	0	0
19.92	0.802	0.662	1.654	2.302	1.607	0.151	1.02	0.151	-0.14	0.853	1.5	0.805	-0.65	0.219	-0.651	0.993	1.641	0.945	-0.51	0.359	-0.51	0.648	-0.047	-1.503	-0.634	-1.503	-0.695	-2.151	-1.282	-2.151	-1.456	-0.587	-1.456	0.869	0	-0.869	6.08	5.02	12.55	17.46	9.65	1.15	4.18	1.15	-1.06	6.47	11.38	4.83	-4.93
21.49	1.437	1.521	0.356	-0.322	1.273	-0.017	0.455	2.093	0.084	-1.081	-1.759	-0.163	-1.454	-0.982	0.657	-1.166	-1.844	-0.248	-1.538	-1.067	0.572	-0.678	0.918	-0.373	0.099	1.738	1.596	0.306	0.777	2.416	-1.29	-0.819	0.82	0.472	2.11	1.639	9.5	10.06	2.35	-2.13	7.65	-0.11	3.01	13.84	0.9	-11.49	-18.7	-1.4	-15.45
18.89	-0.39	0.311	-0.102	-0.192	0.123	0.313	-0.119	0.342	0.7	0.288	0.198	0.513	0.703	0.271	0.732	-0.412	-0.502	-0.188	0.002	-0.43	0.031	-0.09	0.225	0.414	-0.017	0.444	0.315	0.505	0.073	0.534	0.19	-0.242	0.219	-0.432	0.029	0.461	-0.23	0.18	-0.06	-0.11	0.07	0.18	-0.07	0.2	0.41	0.17	0.12	0.3	0.41
18.88	-0.034	0.003	-0.013	1.985	2.345	0.131	0.828	0.133	0.037	0.021	2.019	2.379	0.165	0.862	0.167	-0.016	1.982	2.342	0.128	0.825	0.13	1.998	2.358	0.144	0.841	0.146	0.36	-1.854	-1.157	-1.852	-2.214	-1.517	-2.212	0.697	0.002	-0.695	-0.03	0	-0.01	1.92	2.27	0.13	0.79	0.13	0.04	0.02	1.96	2.3	0.16
19.27	-0.067	0.375	-0.031	-0.032	0.51	0.151	1.402	0.151	0.443	0.036	0.035	0.578	0.219	1.469	0.219	-0.407	-0.407	0.135	-0.224	1.027	-0.224	0	0.542	0.183	1.434	0.183	0.542	0.183	1.434	0.183	-0.359	0.892	-0.359	1.251	0	-1.251	-16.98	94.53	-7.92	-8.05	16.23	38.1	28.24	38.08	111.51	9.05	8.93	18.38	55.08
19.97	0.098	0.393	1.615	0.518	1.792	-0.057	2.633	-0.057	0.296	1.518	0.421	1.694	-0.154	2.535	-0.154	1.222	0.125	1.399	-0.45	2.239	-0.45	-1.097	0.177	-1.672	1.017	-1.672	1.274	-0.575	2.114	-0.575	-1.849	0.84	-1.849	2.689	0	-2.689	0.5	2.01	9.45	2.08	10.48	-0.33	15.4	-0.33	1.37	7.82	1.59	8.73	-0.79
20.72	-1.917	-1.457	-1.61	-1.216	-1.153	-0.789	1.812	-0.785	0.46	0.307	0.701	0.764	1.128	3.729	1.132	-0.153	0.242	0.304	0.668	3.269	0.672	0.395	0.457	0.821	3.422	0.826	0.062	0.427	3.027	0.431	0.364	2.965	0.368	2.601	0.004	-2.597	-15.42	-12.11	-14.71	-7.55	-10.53	-7.21	16.55	-7.17	3.78	2.76	4.33	6.88	10.16
17.74	0	1.467	0	0	0	0.056	0	0.069	1.467	0	0	0	0.056	0	0.069	-1.467	-1.467	-1.467	-1.412	-1.467	-1.398	0	0	0.056	0	0.069	0	0.056	0	0.069	0.056	0	0.069	-0.056	0.014	0.069	0	0	0	0	0	0	0	0	0	0	0	0	0
18.83	-3.777	-3.777	-2.089	-3.777	-1.122	-3.722	-0.626	-3.708	0	1.688	0	2.656	0.056	3.152	0.069	1.688	0	2.656	0.056	3.152	0.069	-1.688	0.967	-1.633	1.463	-1.619	2.656	0.056	3.152	0.069	-2.6	0.496	-2.586	3.096	0.014	-3.082	-76.94	-76.94	-12.11	-76.94	-22.85	-75.81	-12.74	-75.52	0	9.84	0	57.5	1.2
19.62	-3.559	-5.549	-4.266	-4.267	-2.404	-4.083	-4.278	-4.083	-1.99	-0.707	-0.707	1.155	-0.524	-0.719	-0.524	1.283	1.283	3.145	1.466	1.271	1.466	0	1.862	0.183	-0.012	0.183	1.862	0.183	-0.012	0.183	-1.679	-1.874	-1.679	-0.195	0	0.195	-82.48	-453.21	-348.41	-348.45	-122.32	-333.49	-349.4	-333.5	-47.59	-16.91	-16.92	25.92	-12.54
21.54	2.71	3.977	1.364	3.023	0.458	0.551	-0.288	0.555	1.267	-1.346	0.314	-2.252	-2.159	-2.998	-2.155	-2.613	-0.954	-3.519	-3.427	-4.265	-3.423	1.659	-0.906	-0.814	-1.652	-0.81	-2.565	-2.473	-3.312	-2.469	0.093	-0.746	0.097	-0.839	0.004	0.843	18.58	24.75	9.61	31.59	2.11	5.75	-3.01	5.79	6.51	-7.49	2.15	-9.27	-14.81
18.4	-0.034	0.937	-0.013	-0.013	-0.033	0.131	-0.018	0.133	0.971	0.021	0.021	0.001	0.165	0.015	0.167	-0.95	-0.95	-0.97	-0.806	-0.956	-0.804	0	-0.02	0.144	-0.006	0.146	-0.02	0.144	-0.005	0.146	0.164	0.015	0.166	-0.15	0.002	0.151	-0.03	0.92	-0.01	-0.01	-0.03	0.13	-0.02	0.13	0.96	0.02	0.02	0	0.16
18.02	-2.16	-0.397	-2.16	-2.16	-2.16	-2.104	-2.16	-2.09	1.762	0	0	0	0.056	0	0.069	-1.762	-1.762	-1.762	-1.707	-1.762	-1.693	0	0	0.056	0	0.069	0	0.056	0	0.069	0.056	0	0.069	-0.056	0.014	0.069	0	0	0	0	0	0	0	0	0	0	0	0	0
18.75	1.636	1.808	-0.019	0.657	-0.04	0.076	-0.025	0.088	0.172	-1.654	-0.979	-1.676	-1.56	-1.661	-1.548	-1.827	-1.151	-1.848	-1.732	-1.833	-1.72	0.676	-0.021	0.094	-0.006	0.106	-0.697	-0.581	-0.682	-0.569	0.116	0.015	0.128	-0.101	0.012	0.113	1.62	1.79	-0.02	0.65	-0.04	0.07	-0.03	0.09	0.17	-1.64	-0.97	-1.66	-1.55
18.15	0.981	0	0	0	1.934	0.056	2.208	0.069	-0.981	-0.981	-0.981	0.953	-0.926	1.226	-0.912	0	0	1.934	0.056	2.208	0.069	0	1.934	0.056	2.208	0.069	1.934	0.056	2.208	0.069	-1.879	0.273	-1.865	2.152	0.014	-2.138	6.41	0	0	0	9.18	0.92	9.83	1.15	-6.41	-6.41	-6.41	3.76	-6.05
17.91	0	0.971	0	0	1.164	0.056	0.85	0.069	0.971	0	0	1.164	0.056	0.85	0.069	-0.971	-0.971	0.194	-0.915	-0.121	-0.901	0	1.164	0.056	0.85	0.069	1.164	0.056	0.85	0.069	-1.109	-0.314	-1.095	0.794	0.014	-0.78	0	17.81	0	0	7.42	1.02	6.27	1.27	17.81	0	0	7.42	1.02
17.75	0	1.502	0	0	0	0.056	0	0.069	1.502	0	0	0	0.056	0	0.069	-1.502	-1.502	-1.502	-1.447	-1.502	-1.433	0	0	0.056	0	0.069	0	0.056	0	0.069	0.056	0	0.069	-0.056	0.014	0.069	0	0	0	0	0	0	0	0	0	0	0	0	0
19.12	-0.39	-0.141	-0.102	-0.192	2.089	0.313	0.508	0.342	0.249	0.288	0.198	2.479	0.703	0.898	0.732	0.039	-0.051	2.229	0.453	0.648	0.482	-0.09	2.191	0.414	0.609	0.444	2.281	0.505	0.7	0.534	-1.776	-1.581	-1.747	0.195	0.029	-0.166	-0.23	-0.08	-0.06	-0.11	1.21	0.18	0.3	0.2	0.14	0.17	0.12	1.44	0.41
20.63	-0.795	-1.012	-0.893	-0.542	0.864	-0.071	1.032	-0.067	-0.217	-0.098	0.253	1.659	0.723	1.826	0.727	0.119	0.47	1.877	0.941	2.044	0.945	0.351	1.757	0.821	1.925	0.826	1.407	0.471	1.574	0.475	-0.936	0.167	-0.932	1.103	0.004	-1.099	-5.05	-4.94	-5.68	-2.81	4.5	-0.45	6.56	-0.43	-1.34	-1.04	1.73	11.44	7.69
17.84	0	0	0	0	2.359	0.056	0	0.069	0	0	0	2.359	0.056	0	0.069	0	0	2.359	0.056	0	0.069	0	2.359	0.056	0	0.069	2.359	0.056	0	0.069	-2.304	-2.359	-2.29	-0.056	0.014	0.069	0	0	0	0	0	0	0	0	0	0	0	0	0
19.22	0.962	-0.188	-0.031	-0.032	1.043	0.151	-0.044	0.151	-1.15	-0.993	-0.994	0.081	-0.81	-1.005	-0.811	0.156	0.156	1.231	0.339	0.144	0.339	0	1.074	0.183	-0.012	0.183	1.075	0.183	-0.012	0.183	-0.892	-1.087	-0.892	-0.195	0	0.195	159.5	-3.65	-5.22	-5.3	20.31	25.08	-7.23	25.06	-22.33	-164.71	-164.79	1.58	-134.42
18.53	-0.034	0.484	-0.013	-0.013	-0.033	0.131	1.602	0.133	0.517	0.021	0.021	0.001	0.165	1.636	0.167	-0.496	-0.497	-0.517	-0.353	1.119	-0.351	0	-0.02	0.144	1.615	0.146	-0.02	0.144	1.615	0.146	0.164	1.635	0.166	1.471	0.002	-1.469	-0.03	0.47	-0.01	-0.01	-0.03	0.13	1.55	0.13	0.5	0.02	0.02	0	0.16
20.58	-1.497	-2.23	-0.154	-2.438	-2.779	-1.45	-2.289	-1.446	-0.733	1.342	-0.941	-1.282	0.047	-0.792	0.051	2.075	-0.208	-0.55	0.78	-0.059	0.784	-2.283	-2.625	-1.296	-2.134	-1.292	-0.342	0.988	0.149	0.992	1.329	0.491	1.333	-0.839	0.004	0.843	-28.63	-25.29	-2.07	-46.62	-53.16	-27.06	-43.77	-27.65	-8.97	20.15	-23.31	-31.77	1.11
21.04	1.115	2.732	-0.943	-0.033	-0.698	-0.121	-0.192	-0.117	1.617	-2.058	-1.149	-1.813	-1.236	-1.307	-1.232	-3.675	-2.766	-3.431	-2.853	-2.924	-2.849	0.909	0.244	0.821	0.751	0.826	-0.665	-0.088	-0.158	-0.084	0.577	0.507	0.581	-0.071	0.004	0.075	6.86	16.8	-5.8	-0.14	-4.06	-0.74	-0.88	-0.72	17.19	-21.88	-5.6	-16.58	-13.14
17.73	0	1.374	0	0	0	0.056	0	0.069	1.374	0	0	0	0.056	0	0.069	-1.374	-1.374	-1.374	-1.318	-1.374	-1.304	0	0	0.056	0	0.069	0	0.056	0	0.069	0.056	0	0.069	-0.056	0.014	0.069	0	0	0	0	0	0	0	0	0	0	0	0	0
20.6	1.766	1.048	-0.271	0.99	-0.519	0.551	-0.288	0.555	-0.718	-2.037	-0.776	-2.285	-1.215	-2.054	-1.211	-1.319	-0.057	-1.567	-0.497	-1.336	-0.493	1.261	-0.248	0.821	-0.017	0.826	-1.509	-0.44	-1.278	-0.436	1.069	0.231	1.074	-0.839	0.004	0.843	31.41	13.22	-4.82	17.41	-6.08	9.79	-5.13	9.87	-9.06	-36.23	-13.63	-26.75	-21.62
22.16	3.28	4.637	1.545	2.708	3.479	0.551	-0.288	2.011	1.357	-1.735	-0.572	0.199	-2.729	-3.568	-1.268	-3.092	-1.93	-1.158	-4.087	-4.925	-2.626	1.163	1.934	-0.994	-1.833	0.467	0.772	-2.157	-2.996	-0.696	-2.929	-3.767	-1.468	-0.839	1.461	2.3	20.24	19.33	7.9	16.22	21.47	3.4	-1.78	6.37	5.66	-8.87	-3.43	1.23	-16.84
18.06	2.342	1.928	0	0	0	0.056	0	0.069	-0.414	-2.342	-2.342	-2.342	-2.286	-2.342	-2.273	-1.928	-1.928	-1.928	-1.873	-1.928	-1.859	0	0	0.056	0	0.069	0	0.056	0	0.069	0.056	0	0.069	-0.056	0.014	0.069	0	0	0	0	0	0	0	0	0	0	0	0	0
19.83	-0.131	0.877	-0.121	-0.211	-0.105	0.333	1.373	0.36	1.008	0.01	-0.08	0.026	0.464	1.504	0.491	-0.998	-1.088	-0.982	-0.545	0.496	-0.517	-0.09	0.016	0.453	1.494	0.481	0.106	0.543	1.584	0.571	0.438	1.478	0.465	1.041	0.027	-1.014	-0.18	1.19	-0.16	-0.29	-0.14	0.45	1.86	0.49	1.36	0.01	-0.11	0.04	0.63
18.37	-0.034	-0.656	-0.013	-0.013	0.5	0.131	0.787	0.133	-0.622	0.021	0.021	0.534	0.165	0.821	0.167	0.644	0.643	1.156	0.787	1.443	0.789	0	0.512	0.144	0.8	0.146	0.513	0.144	0.8	0.146	-0.369	0.287	-0.367	0.656	0.002	-0.654	-0.03	-0.65	-0.01	-0.01	0.49	0.13	0.78	0.13	-0.61	0.02	0.02	0.53	0.16
18.4	0.274	0.725	-0.019	-0.019	-0.04	0.076	-0.025	0.088	0.452	-0.293	-0.293	-0.314	-0.198	-0.299	-0.186	-0.744	-0.744	-0.766	-0.65	-0.751	-0.638	0	-0.021	0.094	-0.006	0.106	-0.021	0.094	-0.006	0.107	0.116	0.015	0.128	-0.101	0.012	0.113	0.27	0.72	-0.02	-0.02	-0.04	0.07	-0.03	0.09	0.45	-0.29	-0.29	-0.31	-0.2
19.12	-0.067	1.072	-0.031	-0.032	-0.073	0.151	-0.044	0.151	1.139	0.036	0.035	-0.006	0.219	0.024	0.219	-1.103	-1.103	-1.145	-0.92	-1.115	-0.92	0	-0.042	0.183	-0.012	0.183	-0.041	0.183	-0.012	0.183	0.224	0.03	0.224	-0.195	0	0.195	-11.66	134.56	-5.44	-5.52	-12.67	26.16	-7.54	26.14	143.02	6.22	6.13	-1.01	37.82
18.95	2.486	-0.015	-0.013	2.849	0.526	0.131	-0.018	0.133	-2.501	-2.498	0.363	-1.96	-2.354	-2.504	-2.353	0.002	2.864	0.541	0.146	-0.003	0.148	2.862	0.538	0.144	-0.006	0.146	-2.323	-2.718	-2.867	-2.716	-0.395	-0.544	-0.393	-0.15	0.002	0.151	2.45	-0.01	-0.01	2.81	0.52	0.13	-0.02	0.13	-2.47	-2.46	0.36	-1.93	-2.32
20.99	1.635	1.94	-0.271	1.206	0.844	0.551	0.911	0.555	0.305	-1.906	-0.429	-0.791	-1.084	-0.724	-1.08	-2.211	-0.734	-1.096	-1.389	-1.029	-1.385	1.476	1.115	0.821	1.182	0.826	-0.362	-0.655	-0.295	-0.651	-0.293	0.067	-0.289	0.36	0.004	-0.356	17.71	21.02	-2.93	13.06	3.46	5.96	4.28	6.01	3.31	-20.65	-4.65	-3.25	-11.75
17.97	0	0.439	0	0	0	0.056	0	3.128	0.439	0	0	0	0.056	0	3.128	-0.439	-0.439	-0.439	-0.384	-0.439	2.689	0	0	0.056	0	3.128	0	0.056	0	3.128	0.056	0	3.128	-0.056	3.073	3.128	0	0	0	0	0	0	0	0	0	0	0	0	0
19.97	0.183	0.61	-0.121	0.468	0.811	0.333	0.988	0.36	0.426	-0.304	0.285	0.627	0.149	0.804	0.176	-0.73	-0.141	0.201	-0.277	0.378	-0.25	0.589	0.931	0.453	1.108	0.481	0.342	-0.136	0.519	-0.109	-0.478	0.177	-0.451	0.655	0.027	-0.628	0.26	0.86	-0.17	0.66	1.14	0.47	1.21	0.51	0.6	-0.43	0.4	0.88	0.21
19.49	-1.017	-1.771	0.708	-0.819	1.889	-0.315	1.655	-0.286	-0.754	1.725	0.198	2.906	0.703	2.673	0.732	2.479	0.952	3.66	1.456	3.427	1.485	-1.527	1.181	-1.023	0.947	-0.994	2.708	0.505	2.475	0.534	-2.204	-0.233	-2.175	1.97	0.029	-1.941	-0.77	-1.34	0.53	-0.62	1.43	-0.24	1.25	-0.22	-0.58	1.33	0.15	2.23	0.54
20.67	1.204	2.248	-0.271	1.024	-0.54	0.551	-0.288	0.555	1.044	-1.475	-0.181	-1.745	-0.654	-1.492	-0.65	-2.519	-1.224	-2.788	-1.697	-2.536	-1.693	1.294	-0.269	0.821	-0.017	0.826	-1.564	-0.473	-1.312	-0.469	1.091	0.252	1.095	-0.839	0.004	0.843	21.42	37.47	-4.82	9.92	-6.94	9.79	-5.13	9.87	17.4	-26.24	-1.75	-22.41	-11.63
18.68	-0.034	-0.656	-0.013	-0.013	-0.033	0.131	4.07	0.133	-0.622	0.021	0.021	0.001	0.165	4.104	0.167	0.644	0.643	0.623	0.787	4.726	0.789	0	-0.02	0.144	4.083	0.146	-0.02	0.144	4.083	0.146	0.164	4.103	0.166	3.939	0.002	-3.937	-0.03	-0.65	-0.01	-0.01	-0.03	0.13	4.01	0.13	-0.61	0.02	0.02	0	0.16
20.67	1.707	1.416	-0.271	-0.437	1.291	0.551	-0.288	0.555	-0.291	-1.978	-2.144	-0.416	-1.157	-1.995	-1.153	-1.687	-1.853	-0.125	-0.866	-1.704	-0.862	-0.166	1.562	0.821	-0.017	0.826	1.728	0.988	0.149	0.992	-0.741	-1.579	-0.736	-0.839	0.004	0.843	47.42	20.29	-7.52	-12.14	35.86	14.22	-8	15.41	-4.17	-54.95	-59.56	-11.56	-29.88
20.72	0.891	0.502	-0.869	-0.076	0.06	-0.048	-0.887	-0.044	-0.388	-1.76	-0.967	-0.831	-0.939	-1.777	-0.935	-1.372	-0.579	-0.443	-0.55	-1.389	-0.546	0.793	0.929	0.821	-0.017	0.826	0.136	0.028	-0.81	0.032	-0.108	-0.946	-0.104	-0.839	0.004	0.843	1.97	1.11	-1.93	-0.17	0.13	-0.11	-1.96	-0.1	-0.86	-3.9	-2.14	-1.84	-2.08
19.19	-0.067	1.712	-0.031	-0.032	-0.073	0.151	-0.044	0.151	1.779	0.036	0.035	-0.006	0.219	0.024	0.219	-1.743	-1.744	-1.785	-1.561	-1.755	-1.561	0	-0.042	0.183	-0.012	0.183	-0.041	0.183	-0.012	0.183	0.224	0.03	0.224	-0.195	0	0.195	-11.66	183.4	-5.44	-5.52	-12.67	26.16	-7.54	26.14	190.62	6.22	6.13	-1.01	37.82
20.17	-0.903	-2.096	-0.155	-3.302	-2.832	-3.119	-3.314	-3.119	-1.193	0.749	-2.399	-1.929	-2.216	-2.411	-2.216	1.942	-1.206	-0.736	-1.023	-1.218	-1.023	-3.148	-2.678	-2.964	-3.159	-2.965	0.47	0.183	-0.012	0.183	-0.287	-0.482	-0.287	-0.195	0	0.195	-25.68	-52.79	-2.39	-127.57	-39.23	-120.49	-128.02	-120.5	-25.77	10.85	-68.23	-25.38	-63.02
18.81	-5.867	-5.867	-0.696	-5.867	-5.867	-5.812	-5.867	-5.798	0	5.172	0	0	0.056	0	0.069	5.172	0	0	0.056	0	0.069	-5.172	-5.172	-5.116	-5.172	-5.102	0	0.056	0	0.069	0.056	0	0.069	-0.056	0.014	0.069	0	0	0	0	0	0	0	0	0	0	0	0	0
20.44	0.477	0.324	-0.271	-0.195	-0.167	0.551	1.127	0.555	-0.153	-0.748	-0.673	-0.645	0.073	0.65	0.077	-0.595	-0.519	-0.492	0.226	0.803	0.231	0.076	0.103	0.821	1.398	0.826	0.028	0.746	1.323	0.75	0.718	1.295	0.722	0.577	0.004	-0.573	4.9	3.45	-2.88	-1.68	-1.78	5.85	10.83	5.9	-1.57	-7.67	-5.64	-6.61	0.75
21.94	-0.694	-0.767	-0.477	-1.527	1.797	-0.33	0.767	-1.518	-0.073	0.217	-0.833	2.49	0.364	1.461	-0.825	0.29	-0.76	2.564	0.437	1.534	-0.751	-1.05	2.273	0.147	1.244	-1.042	3.323	1.197	2.294	0.008	-2.127	-1.029	-3.315	1.097	-1.189	-2.286	-6.29	-6.95	-4.29	-13.84	10.48	-1.39	6.32	-13.76	-0.66	1.95	-7.55	14.53	1.53
21.86	-0.21	-2.927	0.09	1.329	3.7	-0.088	5.023	2.534	-2.717	0.299	1.539	3.909	0.122	5.232	2.744	3.016	4.256	6.627	2.839	7.949	5.461	1.24	3.61	-0.178	4.933	2.444	2.37	-1.417	3.693	1.205	-3.788	1.323	-1.166	5.111	2.622	-2.489	-0.78	-12.39	0.38	5.63	15.67	-0.37	21.27	10.73	-12.65	1.39	7.17	18.21	0.57
18.05	0	0	0	0	2.638	0.056	1.544	0.069	0	0	0	2.638	0.056	1.544	0.069	0	0	2.638	0.056	1.544	0.069	0	2.638	0.056	1.544	0.069	2.638	0.056	1.544	0.069	-2.582	-1.093	-2.568	1.489	0.014	-1.475	0	0	0	0	0	0	0	0	0	0	0	0	0
20.16	-0.468	1.022	-0.271	-0.437	-0.779	0.551	-0.288	0.555	1.489	0.197	0.03	-0.311	1.018	0.179	1.022	-1.293	-1.459	-1.801	-0.471	-1.31	-0.467	-0.166	-0.508	0.821	-0.017	0.826	-0.342	0.988	0.149	0.992	1.329	0.491	1.333	-0.839	0.004	0.843	-6.04	12.07	-6.54	-10.55	-18.8	12.85	-6.96	13.39	13.92	2.54	0.39	-4.02	13.01
18.62	0.272	1.418	-0.013	0.675	0.46	0.131	-0.018	0.133	1.146	-0.285	0.402	0.187	-0.141	-0.29	-0.139	-1.431	-0.744	-0.959	-1.287	-1.437	-1.286	0.687	0.472	0.144	-0.006	0.146	-0.215	-0.543	-0.693	-0.542	-0.328	-0.478	-0.327	-0.15	0.002	0.151	0.26	1.34	-0.01	0.64	0.43	0.12	-0.02	0.13	1.08	-0.27	0.38	0.18	-0.13
19.88	0.509	-0.203	-0.121	-0.211	0.56	0.333	1.587	0.36	-0.712	-0.629	-0.72	0.051	-0.176	1.079	-0.149	0.083	-0.008	0.763	0.536	1.791	0.563	-0.09	0.681	0.453	1.708	0.481	0.771	0.543	1.798	0.571	-0.227	1.027	-0.2	1.255	0.027	-1.227	0.88	-0.35	-0.21	-0.36	0.96	0.57	2.73	0.62	-1.23	-1.08	-1.24	0.09	-0.3
18.37	-0.034	0.654	-0.013	-0.013	-0.033	0.131	-0.018	0.133	0.687	0.021	0.021	0.001	0.165	0.015	0.167	-0.666	-0.667	-0.687	-0.522	-0.672	-0.521	0	-0.02	0.144	-0.006	0.146	-0.02	0.144	-0.005	0.146	0.164	0.015	0.166	-0.15	0.002	0.151	-0.03	0.64	-0.01	-0.01	-0.03	0.13	-0.02	0.13	0.68	0.02	0.02	0	0.16
18.02	0	0	0	3.972	0	0.056	0	0.069	0	0	3.972	0	0.056	0	0.069	0	3.972	0	0.056	0	0.069	3.972	0	0.056	0	0.069	-3.972	-3.916	-3.972	-3.902	0.056	0	0.069	-0.056	0.014	0.069	0	0	0	0	0	0	0	0	0	0	0	0	0
18.45	-0.034	1.073	-0.019	-0.019	0.413	0.076	-0.025	0.088	1.106	0.015	0.015	0.446	0.109	0.008	0.121	-1.091	-1.092	-0.66	-0.997	-1.098	-0.985	0	0.432	0.094	-0.006	0.106	0.432	0.094	-0.006	0.107	-0.337	-0.438	-0.325	-0.101	0.012	0.113	-0.03	1.06	-0.02	-0.02	0.41	0.07	-0.03	0.09	1.1	0.01	0.01	0.44	0.11
17.91	1.217	1.747	0	0	0	0.056	0	0.069	0.531	-1.217	-1.217	-1.217	-1.161	-1.217	-1.147	-1.747	-1.747	-1.747	-1.692	-1.747	-1.678	0	0	0.056	0	0.069	0	0.056	0	0.069	0.056	0	0.069	-0.056	0.014	0.069	0	0	0	0	0	0	0	0	0	0	0	0	0
20.7	1.165	2.075	-0.271	0.659	0.316	0.551	-0.288	0.555	0.91	-1.436	-0.507	-0.849	-0.615	-1.454	-0.611	-2.346	-1.417	-1.759	-1.525	-2.364	-1.521	0.93	0.587	0.821	-0.017	0.826	-0.343	-0.108	-0.947	-0.104	0.234	-0.604	0.238	-0.839	0.004	0.843	19.37	36.92	-4.82	4.21	5.62	9.79	-5.13	9.87	15.13	-23.87	-3.21	-14.12	-10.22
18.88	0.985	-0.614	-0.169	-0.245	-0.413	0.293	-0.169	0.282	-1.599	-1.154	-1.23	-1.398	-0.691	-1.154	-0.702	0.445	0.369	0.201	0.908	0.445	0.897	-0.076	-0.244	0.462	0	0.451	-0.168	0.539	0.076	0.528	0.707	0.244	0.696	-0.462	-0.011	0.451	0.59	-0.37	-0.1	-0.15	-0.25	0.18	-0.1	0.17	-0.96	-0.69	-0.74	-0.84	-0.42
19.14	-0.067	1.298	-0.031	-0.032	-0.073	0.151	-0.044	0.151	1.365	0.036	0.035	-0.006	0.219	0.024	0.219	-1.329	-1.33	-1.371	-1.147	-1.341	-1.147	0	-0.042	0.183	-0.012	0.183	-0.041	0.183	-0.012	0.183	0.224	0.03	0.224	-0.195	0	0.195	-11.66	115.18	-5.44	-5.52	-12.67	26.16	-7.54	26.14	121.16	6.22	6.13	-1.01	37.82
19.8	0.704	1.584	-0.121	-0.211	-0.406	0.333	-0.144	0.36	0.88	-0.824	-0.915	-1.109	-0.371	-0.848	-0.344	-1.704	-1.794	-1.989	-1.251	-1.728	-1.224	-0.09	-0.285	0.453	-0.024	0.481	-0.195	0.543	0.066	0.571	0.738	0.261	0.765	-0.477	0.027	0.504	1.01	2.28	-0.17	-0.3	-0.58	0.48	-0.21	0.52	1.26	-1.18	-1.31	-1.59	-0.53
20.18	-0.807	0.429	-0.271	-0.437	-0.779	0.551	0.832	0.555	1.237	0.537	0.37	0.029	1.358	1.639	1.362	-0.7	-0.866	-1.208	0.121	0.403	0.126	-0.166	-0.508	0.821	1.103	0.826	-0.342	0.988	1.269	0.992	1.329	1.611	1.333	0.281	0.004	-0.277	-22.43	11.92	-7.52	-12.14	-21.63	14.22	23.11	15.41	34.35	14.9	10.29	0.8	35.08
20.51	1.03	0.798	0.193	-0.437	0.626	0.551	-0.288	0.555	-0.233	-0.837	-1.467	-0.404	-0.48	-1.319	-0.476	-0.605	-1.235	-0.172	-0.247	-1.086	-0.243	-0.63	0.433	0.358	-0.481	0.362	1.063	0.988	0.149	0.992	-0.075	-0.914	-0.071	-0.839	0.004	0.843	8.17	7.86	1.4	-4.65	5.97	5.85	-3.06	5.9	-1.77	-5.19	-11.63	-3.01	-3.8
19.13	-0.067	-1.315	-0.031	-0.032	1.495	0.151	0.876	0.151	-1.247	0.036	0.035	1.562	0.219	0.943	0.219	1.283	1.283	2.81	1.466	2.19	1.466	0	1.527	0.183	0.907	0.183	1.527	0.183	0.908	0.183	-1.344	-0.619	-1.344	0.724	0	-0.724	-16.98	-331.23	-7.92	-8.05	130.82	38.1	22.19	38.08	-314.25	9.05	8.93	136.72	55.08
20.78	-0.628	0.118	-0.431	-0.147	1.194	-0.068	-0.078	-0.064	0.746	0.197	0.482	1.823	0.561	0.551	0.565	-0.549	-0.264	1.077	-0.185	-0.195	-0.181	0.285	1.625	0.363	0.353	0.368	1.341	0.079	0.069	0.083	-1.262	-1.272	-1.258	-0.01	0.004	0.014	-2.88	0.54	-1.71	-0.67	5.46	-0.31	-0.27	-0.29	4.87	0.99	3.15	11.9	3.66
18.16	1.074	1.487	0	0	2.607	0.056	0	0.069	0.414	-1.074	-1.074	1.534	-1.018	-1.074	-1.004	-1.487	-1.487	1.12	-1.432	-1.487	-1.418	0	2.607	0.056	0	0.069	2.607	0.056	0	0.069	-2.552	-2.607	-2.538	-0.056	0.014	0.069	6.73	24.59	0	0	39.68	0.92	0	1.15	2.59	-6.73	-6.73	9.49	-6.38
19.41	-0.067	1.142	-0.031	-0.032	-0.073	0.151	2.516	0.151	1.209	0.036	0.035	-0.006	0.219	2.583	0.219	-1.173	-1.174	-1.215	-0.991	1.374	-0.991	0	-0.042	0.183	2.547	0.183	-0.041	0.183	2.548	0.183	0.224	2.589	0.224	2.365	0	-2.365	-11.66	83.37	-5.44	-5.52	-12.67	26.16	135.67	26.14	88.29	6.22	6.13	-1.01	37.82
19.52	-0.451	0.099	-0.182	-0.258	-0.446	0.369	-0.187	0.346	0.551	0.27	0.193	0.005	0.82	0.264	0.797	-0.281	-0.358	-0.546	0.27	-0.287	0.246	-0.076	-0.265	0.551	-0.006	0.528	-0.188	0.627	0.071	0.604	0.815	0.259	0.792	-0.556	-0.023	0.533	-0.69	0.15	-0.28	-0.4	-0.69	0.57	-0.29	0.53	0.85	0.41	0.3	0.01	1.26
20.96	-1.701	-1.137	-0.103	-1.229	-0.012	-0.815	0.615	-0.81	0.564	1.598	0.472	1.689	0.887	2.316	0.891	1.034	-0.092	1.125	0.322	1.752	0.326	-1.126	0.091	-0.711	0.718	-0.707	1.217	0.415	1.844	0.419	-0.802	0.627	-0.798	1.43	0.004	-1.425	-19.72	-13.18	-1.2	-8.5	-0.14	-9.44	6.14	-9.39	6.54	18.52	3.26	19.58	10.28
24.36	0.016	3.319	1.229	0.877	0.557	0.677	0.361	-1.812	3.303	1.212	0.861	0.541	0.661	0.344	-1.828	-2.091	-2.442	-2.762	-2.642	-2.959	-5.131	-0.352	-0.671	-0.551	-0.868	-3.04	-0.32	-0.2	-0.517	-2.689	0.12	-0.197	-2.369	-0.317	-2.489	-2.172	0.03	5.17	1.91	1.37	0.86	1.06	0.56	-2.58	5.15	1.89	1.34	0.83	1.03
20.3	0.223	0.709	-0.271	0.457	-0.779	0.551	-0.288	0.555	0.486	-0.494	0.234	-1.002	0.328	-0.511	0.332	-0.98	-0.252	-1.488	-0.158	-0.997	-0.154	0.728	-0.508	0.821	-0.017	0.826	-1.236	0.093	-0.745	0.098	1.329	0.491	1.333	-0.839	0.004	0.843	3.2	10.55	-4.82	3.2	-13.85	9.79	-5.13	9.87	6.18	-7.1	1.58	-14.39	4.71
19.53	-0.319	-0.145	-0.182	-0.017	-0.446	0.369	-0.187	0.346	0.174	0.137	0.302	-0.128	0.688	0.131	0.665	-0.037	0.128	-0.302	0.514	-0.043	0.491	0.165	-0.265	0.551	-0.006	0.528	-0.429	0.386	-0.17	0.363	0.815	0.259	0.792	-0.556	-0.023	0.533	-0.48	-0.22	-0.28	-0.03	-0.68	0.56	-0.28	0.53	0.26	0.21	0.46	-0.19	1.05
[truncated: 97 more columns]
