# Supplementary material for: Inhibiting host-protein deposition on urinary catheters reduces associated urinary tract infections
Source: eLife. 2022 Mar 29;11:e75798. doi: 10.7554/eLife.75798 (PMC8986317; doi:10.7554/eLife.75798)
Supplement: Figure 6—source data 1. — Individual data from all figures involving small datasets displayed in individual tabs of this source file. This includes Figures 1B and 2A-F, Figure 3B, Figure 4, Figure 1—figure supplement 1 and Figure 2—figure supplement 1. [file elife-75798-fig6-data1.zip › Flores_Data/AF1_id_venn3-data_AFCat1.txt]

Protein.IDs	rep
A0A075B5J9;A0A075B5K3;A0A0G2JFA8;A0A0G2JDN5 [ ...]	2
A0A075B5N7;A0A140T8Q3;A0A140T8P1;A0A140T8N7;A0A140T8N5;A0A140T8M5;A0A0G2JGY3;P01633 [Ig kappa chain V19-17 ...]	2
A0A075B5P3;A0A0A6YVP0;P01867 [Ig gamma-2B chain C region ...]	1
A0A075B5P3;A0A0A6YVP0;P01867 [Ig gamma-2B chain C region ...]	2
A0A075B5P4;A0A0A6YWR2;P01868;P01869 [Ig gamma-1 chain C region secreted form;Ig gamma-1 ...]	1
A0A075B5P4;A0A0A6YWR2;P01868;P01869 [Ig gamma-1 chain C region secreted form;Ig gamma-1 ...]	2
A0A075B5P5;A0A1Y7VJN6;P03987 [Ig gamma-3 chain C region ...]	1
A0A075B5P5;A0A1Y7VJN6;P03987 [Ig gamma-3 chain C region ...]	2
A0A075B5P6;A0A075B6A0;P01872 [Ig mu chain C region ...]	1
A0A075B5P6;A0A075B6A0;P01872 [Ig mu chain C region ...]	2
A0A087WNS0;A0A087WQK0;P27659 [60S ribosomal protein L3 ...]	1
A0A087WPL5;E9QNN1;O70133;Q3UR42 [ATP-dependent RNA helicase A ...]	1
A0A087WPL5;E9QNN1;O70133;Q3UR42 [ATP-dependent RNA helicase A ...]	2
A0A087WRJ2;A0A087WPF8;A0A087WSR2;E9QN99;A0A087WP24;Q8VCR7;A0A1L1SRH5;A0A1L1SUX1 [Alpha/beta hydrolase domain-containing protein 14B ...]	1
A0A087WRJ2;A0A087WPF8;A0A087WSR2;E9QN99;A0A087WP24;Q8VCR7;A0A1L1SRH5;A0A1L1SUX1 [Alpha/beta hydrolase domain-containing protein 14B ...]	2
A0A087WSF5;G5E8E1;A0A087WNU6;E9Q9T1;A0A087WPK3;Q3UZ39 [Leucine-rich repeat flightless-interacting protein ...]	2
A0A087WSQ5;Q99K94;Q8C3V4;A0A087WSP5;P42225 [Signal transducer and activator of transcription;S ...]	1
A0A087WSQ5;Q99K94;Q8C3V4;A0A087WSP5;P42225 [Signal transducer and activator of transcription;S ...]	2
A0A0A0MQ73;Q6PDK2 [Histone-lysine N-methyltransferase;Histone-lysine ...]	2
A0A0A0MQ82;Q9WTR2 [Mitogen-activated protein kinase kinase kinase 6 ...]	2
A0A0A0MQA5;P68368;A0A087WQS4;A0A087WRB4;A0A087WSB0;A0A087WSL5 [Tubulin alpha-4A chain ...]	1
A0A0A0MQA5;P68368;A0A087WQS4;A0A087WRB4;A0A087WSB0;A0A087WSL5 [Tubulin alpha-4A chain ...]	2
A0A0A0MQG2;Q62261 [Spectrin beta chain, non-erythrocytic 1 ...]	1
A0A0A0MQG2;Q62261 [Spectrin beta chain, non-erythrocytic 1 ...]	2
A0A0A0MQM0;P63242;Q8BGY2;J3QPS8 [Eukaryotic translation initiation factor 5A;Eukary ...]	1
A0A0A0MQM0;P63242;Q8BGY2;J3QPS8 [Eukaryotic translation initiation factor 5A;Eukary ...]	2
A0A0A6YW21;Q9D7S7 [60S ribosomal protein L22-like 1 ...]	2
A0A0A6YW67;E9Q9J0;E9Q4P0;E9Q5F6;E9QNP0;Q5SX22;P62984;P62983;P0CG49;P0CG50 [Ubiquitin-60S ribosomal protein L40;Ubiquitin;60S ...]	1
A0A0A6YW67;E9Q9J0;E9Q4P0;E9Q5F6;E9QNP0;Q5SX22;P62984;P62983;P0CG49;P0CG50 [Ubiquitin-60S ribosomal protein L40;Ubiquitin;60S ...]	2
A0A0A6YW72 [ ...]	1
A0A0A6YW77;P11672 [Neutrophil gelatinase-associated lipocalin ...]	1
A0A0A6YW77;P11672 [Neutrophil gelatinase-associated lipocalin ...]	2
A0A0A6YY34;A0A0A6YVV2;P11352 [Glutathione peroxidase;Glutathione peroxidase 1 ...]	1
A0A0A6YY34;A0A0A6YVV2;P11352 [Glutathione peroxidase;Glutathione peroxidase 1 ...]	2
A0A0G2JEU1;P47738;A0A0G2JF60;A0A0G2JFQ0;D3YYF3;Q62148;G3UWP3;P24549;Q9JHW9;Q9CZS1 [Aldehyde dehydrogenase, mitochondrial ...]	1
A0A0G2JEU1;P47738;A0A0G2JF60;A0A0G2JFQ0;D3YYF3;Q62148;G3UWP3;P24549;Q9JHW9;Q9CZS1 [Aldehyde dehydrogenase, mitochondrial ...]	2
A0A0G2JEZ3;E9PZM4 [Chromodomain-helicase-DNA-binding protein 2 ...]	1
A0A0G2JEZ3;E9PZM4 [Chromodomain-helicase-DNA-binding protein 2 ...]	2
A0A0G2JFQ3;D3YZT0;D3Z629;S4R1R7;A0A0G2JES3;A0A140T8T4;P51410 [60S ribosomal protein L9 ...]	1
A0A0G2JFQ3;D3YZT0;D3Z629;S4R1R7;A0A0G2JES3;A0A140T8T4;P51410 [60S ribosomal protein L9 ...]	2
A0A0G2JG10;Q497W9;O35286 [Pre-mRNA-splicing factor ATP-dependent RNA helicas ...]	1
A0A0G2JGD2;P07091 [Protein S100-A4 ...]	1
A0A0G2JGD2;P07091 [Protein S100-A4 ...]	2
A0A0G2JGQ4;P54729 [NEDD8 ultimate buster 1 ...]	2
A0A0G2JGX3;Q9CQQ7 [ATP synthase F(0) complex subunit B1, mitochondria ...]	1
A0A0G2JGX3;Q9CQQ7 [ATP synthase F(0) complex subunit B1, mitochondria ...]	2
A0A0J9YUE9;Q3T9X3;A0A0J9YUN4;Q3TCR7;G3X9G4;F8WIV5;P39053;P39054;G3UZZ3;D6RH60;G3UY64;G3UXX2;E9QLL2;Q8BZ98 [Dynamin-1;Dynamin-2 ...]	1
A0A0J9YUE9;Q3T9X3;A0A0J9YUN4;Q3TCR7;G3X9G4;F8WIV5;P39053;P39054;G3UZZ3;D6RH60;G3UY64;G3UXX2;E9QLL2;Q8BZ98 [Dynamin-1;Dynamin-2 ...]	2
A0A0J9YUZ4;P63158;A0A0J9YUD8;D3YVC6;D3YZ18 [High mobility group protein B1 ...]	1
A0A0J9YUZ4;P63158;A0A0J9YUD8;D3YVC6;D3YZ18 [High mobility group protein B1 ...]	2
A0A0N4SUQ1;A0A0N4SUN8;A0A0N4SWH2;A0A0N4SV32;Q3UMP4;Q9CY58;A0A0N4SVK5;A0A0N4SV40 [Plasminogen activator inhibitor 1 RNA-binding prot ...]	1
A0A0N4SUU7 [ ...]	2
A0A0N4SV66;Q8CGP4;C0HKE9;C0HKE8;C0HKE7;C0HKE6;C0HKE5;C0HKE4;C0HKE3;C0HKE2;C0HKE1;Q8CGP6;Q8R1M2;Q8CGP7;Q8CGP5;Q8BFU2;Q64523;Q6GSS7;P27661;Q64522;G3UWL7 [Histone H2A;Histone H2A type 1-H;Histone H2A.J;His ...]	1
A0A0N4SV66;Q8CGP4;C0HKE9;C0HKE8;C0HKE7;C0HKE6;C0HKE5;C0HKE4;C0HKE3;C0HKE2;C0HKE1;Q8CGP6;Q8R1M2;Q8CGP7;Q8CGP5;Q8BFU2;Q64523;Q6GSS7;P27661;Q64522;G3UWL7 [Histone H2A;Histone H2A type 1-H;Histone H2A.J;His ...]	2
A0A0N4SVB8;F6QKK2;Q9CQW2;Q8VEH3 [ADP-ribosylation factor-like protein 8B;ADP-ribosy ...]	1
A0A0N4SVB8;F6QKK2;Q9CQW2;Q8VEH3 [ADP-ribosylation factor-like protein 8B;ADP-ribosy ...]	2
A0A0N4SW34;A0A0N4SW07;P50518 [V-type proton ATPase subunit E 1 ...]	1
A0A0N4SW34;A0A0N4SW07;P50518 [V-type proton ATPase subunit E 1 ...]	2
A0A0R4IZY6;Q61096;F6ZK01 [Myeloblastin ...]	1
A0A0R4IZY6;Q61096;F6ZK01 [Myeloblastin ...]	2
A0A0R4J027;P54987 [Cis-aconitate decarboxylase ...]	1
A0A0R4J039;Q9ESB3;A0A338P6H8 [Histidine-rich glycoprotein ...]	1
A0A0R4J039;Q9ESB3;A0A338P6H8 [Histidine-rich glycoprotein ...]	2
A0A0R4J043;P28825 [Meprin A subunit alpha ...]	1
A0A0R4J043;P28825 [Meprin A subunit alpha ...]	2
A0A0R4J083;P51174 [Long-chain specific acyl-CoA dehydrogenase, mitoch ...]	1
A0A0R4J083;P51174 [Long-chain specific acyl-CoA dehydrogenase, mitoch ...]	2
A0A0R4J093;Q9DBP5 [UMP-CMP kinase ...]	1
A0A0R4J093;Q9DBP5 [UMP-CMP kinase ...]	2
A0A0R4J0B2;Q8VCI0 [Phospholipase B-like 1;Phospholipase B-like 1 chai ...]	1
A0A0R4J0B2;Q8VCI0 [Phospholipase B-like 1;Phospholipase B-like 1 chai ...]	2
A0A0R4J0I1;P07759;Q80X76 [Serine protease inhibitor A3K ...]	1
A0A0R4J0I1;P07759;Q80X76 [Serine protease inhibitor A3K ...]	2
A0A0R4J0P5;P97814 [Proline-serine-threonine phosphatase-interacting p ...]	1
A0A0R4J0R1;O70404;A0A0U1RPE8 [Vesicle-associated membrane protein 8 ...]	1
A0A0R4J0R1;O70404;A0A0U1RPE8 [Vesicle-associated membrane protein 8 ...]	2
A0A0R4J0S8;Q80YF6 [Uroplakin-3b ...]	1
A0A0R4J0S8;Q80YF6 [Uroplakin-3b ...]	2
A0A0R4J0X5;A0A0A0MQA3;Q00896;P07758 [Alpha-1-antitrypsin 1-3;Alpha-1-antitrypsin 1-1 ...]	1
A0A0R4J0X5;A0A0A0MQA3;Q00896;P07758 [Alpha-1-antitrypsin 1-3;Alpha-1-antitrypsin 1-1 ...]	2
A0A0R4J1C2;A0A0R4IZW8;O88456;Q9D7J7 [Calpain small subunit 1;Calpain small subunit 2 ...]	1
A0A0R4J1C2;A0A0R4IZW8;O88456;Q9D7J7 [Calpain small subunit 1;Calpain small subunit 2 ...]	2
A0A0R4J2B2;Q6WVG3;Q8C7J6 [BTB/POZ domain-containing protein KCTD12 ...]	1
A0A0R4J2B2;Q6WVG3;Q8C7J6 [BTB/POZ domain-containing protein KCTD12 ...]	2
A0A0U1RNJ1;P19096 [Fatty acid synthase;[Acyl-carrier-protein] S-acety ...]	1
A0A0U1RNJ1;P19096 [Fatty acid synthase;[Acyl-carrier-protein] S-acety ...]	2
A0A0U1RNR3;A0A0U1RNK9;A0A0U1RNP5;A0A0N4SVE0;Q9DCW4 [Electron transfer flavoprotein subunit beta ...]	1
A0A0U1RNR3;A0A0U1RNK9;A0A0U1RNP5;A0A0N4SVE0;Q9DCW4 [Electron transfer flavoprotein subunit beta ...]	2
A0A0U1RP13;Q8VDP6 [CDP-diacylglycerol--inositol 3-phosphatidyltransfe ...]	2
A0A171EBL2;E9Q555 [E3 ubiquitin-protein ligase RNF213 ...]	2
A0A1B0GR11;Q93092 [Transaldolase ...]	1
A0A1B0GR11;Q93092 [Transaldolase ...]	2
A0A1B0GR41;A0A1C7CYU3;Q02819 [Nucleobindin-1 ...]	1
A0A1B0GR41;A0A1C7CYU3;Q02819 [Nucleobindin-1 ...]	2
A0A1B0GRR3;P62281;A0A1B0GSE8 [40S ribosomal protein S11 ...]	1
A0A1B0GRR3;P62281;A0A1B0GSE8 [40S ribosomal protein S11 ...]	2
A0A1B0GS70;Q9R1P4 [Proteasome subunit alpha type-1 ...]	1
A0A1B0GS70;Q9R1P4 [Proteasome subunit alpha type-1 ...]	2
A0A1B0GSB2;P19253;A0A1B0GQW6;A0A1B0GSL5;A0A1B0GSC2;A0A1B0GRH1;A0A1B0GSF0;A0A1B0GSQ6;A0A1B0GTA1;A0A1B0GS68 [60S ribosomal protein L13a ...]	1
A0A1B0GSB2;P19253;A0A1B0GQW6;A0A1B0GSL5;A0A1B0GSC2;A0A1B0GRH1;A0A1B0GSF0;A0A1B0GSQ6;A0A1B0GTA1;A0A1B0GS68 [60S ribosomal protein L13a ...]	2
A0A1B0GSG5;Q91VI7;A0A1B0GRG4 [Ribonuclease inhibitor ...]	1
A0A1B0GSG5;Q91VI7;A0A1B0GRG4 [Ribonuclease inhibitor ...]	2
A0A1B0GSR9;A0A1B0GSX0;P06151;A0A1B0GSL7;A0A1B0GT41;A0A1B0GQX5;D3YZQ9;A0A1B0GRW9;A0A1B0GS79;A0A1B0GRC1;A0A1B0GRS2;A0A1B0GSR2;D3YVR7;D3YZE4;A0A1B0GRE9;P00342 [L-lactate dehydrogenase A chain;L-lactate dehydrog ...]	1
A0A1B0GSR9;A0A1B0GSX0;P06151;A0A1B0GSL7;A0A1B0GT41;A0A1B0GQX5;D3YZQ9;A0A1B0GRW9;A0A1B0GS79;A0A1B0GRC1;A0A1B0GRS2;A0A1B0GSR2;D3YVR7;D3YZE4;A0A1B0GRE9;P00342 [L-lactate dehydrogenase A chain;L-lactate dehydrog ...]	2
A0A1D5RLV1;A0A571BEG4;A2A839;A2A838;A2AD32;A2A842;A2A841;P48193 [Protein 4.1 ...]	1
A0A1D5RLV1;A0A571BEG4;A2A839;A2A838;A2AD32;A2A842;A2A841;P48193 [Protein 4.1 ...]	2
A0A1D5RME4;A0A1D5RLW5;A0A1D5RM85;P62717 [60S ribosomal protein L18a ...]	1
A0A1L1SQA8;P62852 [40S ribosomal protein S25 ...]	1
A0A1L1SQA8;P62852 [40S ribosomal protein S25 ...]	2
A0A1L1SQS5;Q80XP8 [Protein FAM76B ...]	2
A0A1L1STC6;Q6ZWR6;A0A1L1SRV6 [Nesprin-1 ...]	1
A0A1L1STC6;Q6ZWR6;A0A1L1SRV6 [Nesprin-1 ...]	2
A0A1L1STN8;P37804 [Transgelin ...]	1
A0A1L1STN8;P37804 [Transgelin ...]	2
A0A1L1SU53;Q9Z0P5;A0A087WRG4;A0A1L1STC8 [Twinfilin-2 ...]	1
A0A1L1SU53;Q9Z0P5;A0A087WRG4;A0A1L1STC8 [Twinfilin-2 ...]	2
A0A1L1SUU4;Q9ERN0 [Secretory carrier-associated membrane protein 2 ...]	1
A0A1L1SUU4;Q9ERN0 [Secretory carrier-associated membrane protein 2 ...]	2
A0A1L1SV25;P57780;E9Q2W9;D3Z761;D3Z0L8;A0A1L1SVJ6;Q91ZE6;E9PX29 [Alpha-actinin-4 ...]	1
A0A1L1SV25;P57780;E9Q2W9;D3Z761;D3Z0L8;A0A1L1SVJ6;Q91ZE6;E9PX29 [Alpha-actinin-4 ...]	2
A0A1W2P6F6;A0A1W2P7Q9;Q60605;A0A1W2P6G5 [Myosin light polypeptide 6 ...]	1
A0A1W2P6F6;A0A1W2P7Q9;Q60605;A0A1W2P6G5 [Myosin light polypeptide 6 ...]	2
A0A1W2P6Y4;Q8R4U0 [Stabilin-2;Short form stabilin-2 ...]	2
A0A1W2P720;A0A1W2P869;A0A1W2P6N3;Q99JZ4;Q9CQC9;P36536 [GTP-binding protein SAR1b;GTP-binding protein SAR1 ...]	1
A0A1W2P720;A0A1W2P869;A0A1W2P6N3;Q99JZ4;Q9CQC9;P36536 [GTP-binding protein SAR1b;GTP-binding protein SAR1 ...]	2
A0A1W2P733;Q922D8 [C-1-tetrahydrofolate synthase, cytoplasmic;Methyle ...]	2
A0A1W2P768;P84228;P68433;F8WI35;P84244;P02301;E0CZ27;E0CYN1;E0CYR7 [Histone H3.2;Histone H3.1;Histone H3;Histone H3.3; ...]	1
A0A1W2P768;P84228;P68433;F8WI35;P84244;P02301;E0CZ27;E0CYN1;E0CYR7 [Histone H3.2;Histone H3.1;Histone H3;Histone H3.3; ...]	2
A0A1W2P7G2;A0A1W2P6N2;Q9D1J3 [SAP domain-containing ribonucleoprotein ...]	2
A0A1W2P7X3;Q561M1;Q9D358 [Low molecular weight phosphotyrosine protein phosp ...]	1
A0A1W2P7X3;Q561M1;Q9D358 [Low molecular weight phosphotyrosine protein phosp ...]	2
A0A1W2P7Z3;P61089 [Ubiquitin-conjugating enzyme E2 N ...]	1
A0A1W2P7Z3;P61089 [Ubiquitin-conjugating enzyme E2 N ...]	2
A0A1Y7VIZ0;Q9CZE3 [Ras-related protein Rab-32 ...]	1
A0A1Y7VLY5;A0A1Y7VKA0;A0A1Y7VKC6;Q9DB29 [Isoamyl acetate-hydrolyzing esterase 1 homolog ...]	1
A0A1Y7VLY5;A0A1Y7VKA0;A0A1Y7VKC6;Q9DB29 [Isoamyl acetate-hydrolyzing esterase 1 homolog ...]	2
A0A1Y7VM65;Q9QUH0 [Glutaredoxin-1 ...]	2
A0A217FL67;Q5SQM0;Q8BQM8 [Echinoderm microtubule-associated protein-like 6;E ...]	2
A0A286YCZ3;E9Q390;A0A286YDF5;Q69ZN7;A0A286YE65 [Myoferlin ...]	1
A0A286YCZ3;E9Q390;A0A286YDF5;Q69ZN7;A0A286YE65 [Myoferlin ...]	2
A0A286YDW8;Q99JI4 [26S proteasome non-ATPase regulatory subunit 6 ...]	1
A0A286YDW8;Q99JI4 [26S proteasome non-ATPase regulatory subunit 6 ...]	2
A0A2C9F2D2;Q07076;A0A286YCW4 [Annexin A7 ...]	1
A0A2C9F2D2;Q07076;A0A286YCW4 [Annexin A7 ...]	2
A0A2I3BPH9;A0A2I3BRN5;Q921M7 [Protein FAM49B ...]	1
A0A2I3BPH9;A0A2I3BRN5;Q921M7 [Protein FAM49B ...]	2
A0A2I3BRG2;S4R295;A0A0R4J049;Q8CIG8 [Protein arginine N-methyltransferase 5 ...]	1
A0A2I3BRQ3;CON__Q0V8M9;Q61704 [Inter-alpha-trypsin inhibitor heavy chain H3 ...]	2
A0A2K6EDJ7;E9Q5L2;E9PVD2;A6X935;CON__Q3T052 [Inter alpha-trypsin inhibitor, heavy chain 4 ...]	1
A0A2K6EDJ7;E9Q5L2;E9PVD2;A6X935;CON__Q3T052 [Inter alpha-trypsin inhibitor, heavy chain 4 ...]	2
A0A2K6EDK8;Q8C255 [Dipeptidase 2 ...]	2
A0A2R8VHF9;E9QPE7;A0A338P6K2;O08638 [Myosin-11 ...]	1
A0A2R8VHF9;E9QPE7;A0A338P6K2;O08638 [Myosin-11 ...]	2
A0A2R8VHP3;Q6IFZ8;D3Z6R0 [ ...]	1
A0A2R8VHP3;Q6IFZ8;D3Z6R0 [ ...]	2
A0A338P684;P48758 [Carbonyl reductase [NADPH] 1 ...]	1
A0A338P684;P48758 [Carbonyl reductase [NADPH] 1 ...]	2
A0A338P6J9;Q921U7;Q8C281;Q8CE04;Q8CE80;P51125 [Calpastatin ...]	1
A0A338P742;A0A338P6Y7;Q9D7G4 [Protein EURL homolog ...]	1
A0A338P742;A0A338P6Y7;Q9D7G4 [Protein EURL homolog ...]	2
A0A338P7C0;O09061 [Proteasome subunit beta type-1 ...]	1
A0A338P7C0;O09061 [Proteasome subunit beta type-1 ...]	2
A0A3B2WCD8;Q3U0V1;A0A3B2W465 [Far upstream element-binding protein 2 ...]	1
A0A3B2WCD8;Q3U0V1;A0A3B2W465 [Far upstream element-binding protein 2 ...]	2
A0A3Q4EH04;A0A3Q4L335;A0A3Q4L393;Q8BL97 [Serine/arginine-rich splicing factor 7 ...]	1
A0A3Q4EH04;A0A3Q4L335;A0A3Q4L393;Q8BL97 [Serine/arginine-rich splicing factor 7 ...]	2
A0A494B9Q2 [ ...]	1
A0A494B9W3;Q8K1B8;A0A494BBJ8;A0A494B9F7 [Fermitin family homolog 3 ...]	1
A0A494B9W3;Q8K1B8;A0A494BBJ8;A0A494B9F7 [Fermitin family homolog 3 ...]	2
A0A494B9Z0;A0A494BBA8;Q642K5;P62862 [40S ribosomal protein S30 ...]	1
A0A494B9Z0;A0A494BBA8;Q642K5;P62862 [40S ribosomal protein S30 ...]	2
A0A494BA30;Q8BMJ2 [Leucine--tRNA ligase, cytoplasmic ...]	1
A0A494BA30;Q8BMJ2 [Leucine--tRNA ligase, cytoplasmic ...]	2
A0A494BA81;K7N6B6;E9PXM3 [ ...]	2
A0A494BA97;Q62422;A0A494B943 [Osteoclast-stimulating factor 1 ...]	1
A0A494BA97;Q62422;A0A494B943 [Osteoclast-stimulating factor 1 ...]	2
A0A494BAW9;A0A494BAU1;A0A494BAX8;E9PYT3;Q91YH5 [Atlastin-3 ...]	1
A0A494BBB0;O35350 [Calpain-1 catalytic subunit ...]	1
A0A494BBB0;O35350 [Calpain-1 catalytic subunit ...]	2
A0A494BBE3;G3X8R0;Q60870 [Receptor expression-enhancing protein;Receptor exp ...]	1
A0A494BBE3;G3X8R0;Q60870 [Receptor expression-enhancing protein;Receptor exp ...]	2
A0A571BEL9;P80317;Q61390 [T-complex protein 1 subunit zeta ...]	1
A0A571BEL9;P80317;Q61390 [T-complex protein 1 subunit zeta ...]	2
A0A571BEU1;Q6IRU2 [Tropomyosin alpha-4 chain ...]	2
A1BN54;Q7TPR4 [Alpha-actinin-1 ...]	1
A1BN54;Q7TPR4 [Alpha-actinin-1 ...]	2
A2A513;CON__P02535-1;P02535 [Keratin, type I cytoskeletal 10 ...]	1
A2A513;CON__P02535-1;P02535 [Keratin, type I cytoskeletal 10 ...]	2
A2A547;P84099 [Ribosomal protein L19;60S ribosomal protein L19 ...]	1
A2A547;P84099 [Ribosomal protein L19;60S ribosomal protein L19 ...]	2
A2A817;A2A816;A2A815;A2A813;Q99LX0 [Protein deglycase DJ-1 ...]	1
A2A817;A2A816;A2A815;A2A813;Q99LX0 [Protein deglycase DJ-1 ...]	2
A2A8D1;E9Q8B3;Q5U458 [DnaJ homolog subfamily C member 11 ...]	1
A2A998;A2A997;Q8K182 [Complement component C8 alpha chain ...]	2
A2AB60;A0A1W2P6X3;Q9JL26 [Formin-like protein 1 ...]	1
A2AB60;A0A1W2P6X3;Q9JL26 [Formin-like protein 1 ...]	2
A2AE89;P10649;F6WHQ7;P19639;D3YVP6;E9QAC8;D3YVP5;Q80W21;F6Y363;D3YZ29;D3YVP8;G5E8M7;O35660;D3YVP9;E9PV63;E9PVM7;P48774 [Glutathione S-transferase Mu 1 ...]	1
A2AE89;P10649;F6WHQ7;P19639;D3YVP6;E9QAC8;D3YVP5;Q80W21;F6Y363;D3YZ29;D3YVP8;G5E8M7;O35660;D3YVP9;E9PV63;E9PVM7;P48774 [Glutathione S-transferase Mu 1 ...]	2
A2AE91;Q8R5I6 [ ...]	1
A2AE91;Q8R5I6 [ ...]	2
A2AH25;Q5FWK3 [Rho GTPase-activating protein 1 ...]	1
A2AH25;Q5FWK3 [Rho GTPase-activating protein 1 ...]	2
A2AKN8;E9PVW0;B8JI96;A2BIN0;P11591 [ ...]	1
A2AKN8;E9PVW0;B8JI96;A2BIN0;P11591 [ ...]	2
A2AKV1;A2AKV2;A2AKV3;Q8C2Q8;A2AKU9;Q91VR2;A2AKV0 [ATP synthase subunit gamma;ATP synthase subunit ga ...]	1
A2AKV1;A2AKV2;A2AKV3;Q8C2Q8;A2AKU9;Q91VR2;A2AKV0 [ATP synthase subunit gamma;ATP synthase subunit ga ...]	2
A2AL12;Q8BG05 [Heterogeneous nuclear ribonucleoprotein A3 ...]	1
A2AL12;Q8BG05 [Heterogeneous nuclear ribonucleoprotein A3 ...]	2
A2APF3 [Transcriptional repressor CTCFL ...]	2
A2AQB2;A2AQA9;E9Q1W3;A0A571BF46;A0A571BF58 [ ...]	2
A2AQC8 [ ...]	2
A2ATR8;P97290 [Plasma protease C1 inhibitor ...]	1
A2BIN1;Q4FZE8;A2AKN9;A2BIM8;P02762;P04938;A9C497;A9C496 [Major urinary protein 6;Major urinary proteins 11 ...]	1
A2BIN1;Q4FZE8;A2AKN9;A2BIM8;P02762;P04938;A9C497;A9C496 [Major urinary protein 6;Major urinary proteins 11 ...]	2
A2CEK3;Q9D0F9 [Phosphoglucomutase-1 ...]	1
A2CEK3;Q9D0F9 [Phosphoglucomutase-1 ...]	2
A2CEK6;B5X0G2;L7N222 [Major urinary protein 17 ...]	1
A2CEK6;B5X0G2;L7N222 [Major urinary protein 17 ...]	2
A2CEK7 [ ...]	1
A2CEK7 [ ...]	2
A3KGU5;A3KGU7;E9Q447;A3KGU9;P16546 [Spectrin alpha chain, non-erythrocytic 1 ...]	1
A3KGU5;A3KGU7;E9Q447;A3KGU9;P16546 [Spectrin alpha chain, non-erythrocytic 1 ...]	2
A3KMP2 [Tetratricopeptide repeat protein 38 ...]	1
A3KMP2 [Tetratricopeptide repeat protein 38 ...]	2
A6BLY7 [Keratin, type I cytoskeletal 28 ...]	1
A6BLY7 [Keratin, type I cytoskeletal 28 ...]	2
A6X925;B7ZBY6;B7ZBY7;E9PY39;Q9D2M8;Q9CZY3;B2KF55 [Ubiquitin-conjugating enzyme E2 variant 2;Ubiquiti ...]	1
A6X925;B7ZBY6;B7ZBY7;E9PY39;Q9D2M8;Q9CZY3;B2KF55 [Ubiquitin-conjugating enzyme E2 variant 2;Ubiquiti ...]	2
A8DUK4;P02088;E9Q223;P02089;CON__Q3SX09;CON__P02070;P02104 [Hemoglobin subunit beta-1 ...]	1
A8DUK4;P02088;E9Q223;P02089;CON__Q3SX09;CON__P02070;P02104 [Hemoglobin subunit beta-1 ...]	2
A8R0W3 [ ...]	1
A8R0W3 [ ...]	2
A8XY17;A2A4J8;Q9CQ80 [Vacuolar protein-sorting-associated protein 25 ...]	1
A8XY17;A2A4J8;Q9CQ80 [Vacuolar protein-sorting-associated protein 25 ...]	2
A8Y5J3;Q9CWS4 [Integrator complex subunit 11 ...]	1
A9R9W0;A2CEL1;P11588;A2CEL0;L7MUC7;A2CEK9 [Major urinary protein 1 ...]	1
A9R9W0;A2CEL1;P11588;A2CEL0;L7MUC7;A2CEK9 [Major urinary protein 1 ...]	2
B1ARA3;P61255;B1ARA5 [60S ribosomal protein L26 ...]	1
B1ARA3;P61255;B1ARA5 [60S ribosomal protein L26 ...]	2
B1ARC0;B1ARB9;S4R1I6;Q8BTS0;Q61656 [Probable ATP-dependent RNA helicase DDX5 ...]	1
B1ARC0;B1ARB9;S4R1I6;Q8BTS0;Q61656 [Probable ATP-dependent RNA helicase DDX5 ...]	2
B1ASZ3;Q9WU65;Q64516 [Glycerol kinase 2;Glycerol kinase ...]	1
B1AT92;Q60631;B1AT95 [Growth factor receptor-bound protein 2 ...]	1
B1AT92;Q60631;B1AT95 [Growth factor receptor-bound protein 2 ...]	2
B1AXP0;B1AXN9;E9PWV3;Q505N6;F6RQA2;F6Q8A4;P18653;P18654;F6UG16;B1AXN8;B2GVN8;A2CEE8;B1AXN5;B1B0X1;A0A338P701;G3UZI3;A2CEE6;A2CEE5;E9PUP0;A2CEE7;E9QK39;Q9WUT3;Q7TPS0 [Ribosomal protein S6 kinase;Ribosomal protein S6 k ...]	1
B1AXP0;B1AXN9;E9PWV3;Q505N6;F6RQA2;F6Q8A4;P18653;P18654;F6UG16;B1AXN8;B2GVN8;A2CEE8;B1AXN5;B1B0X1;A0A338P701;G3UZI3;A2CEE6;A2CEE5;E9PUP0;A2CEE7;E9QK39;Q9WUT3;Q7TPS0 [Ribosomal protein S6 kinase;Ribosomal protein S6 k ...]	2
B1AXW5;B1AXW6;P35700;B1AXW4;B1AZS9;O08807 [Peroxiredoxin-1 ...]	1
B1AXW5;B1AXW6;P35700;B1AXW4;B1AZS9;O08807 [Peroxiredoxin-1 ...]	2
B1B1A8;Q6PDN3 [Myosin light chain kinase, smooth muscle;Myosin li ...]	1
B1B1A8;Q6PDN3 [Myosin light chain kinase, smooth muscle;Myosin li ...]	2
B2KF34;A0A3B2WB60;P47811 [Mitogen-activated protein kinase 14 ...]	1
B2KF34;A0A3B2WB60;P47811 [Mitogen-activated protein kinase 14 ...]	2
B7FAV1;B7FAU9;Q8BTM8;F6XC15;Q8VHX6;F6Z2C0;J3JS91 [Filamin-A ...]	1
B7FAV1;B7FAU9;Q8BTM8;F6XC15;Q8VHX6;F6Z2C0;J3JS91 [Filamin-A ...]	2
B7ZCL9;B7ZCL8;A2AN84;P70290 [55 kDa erythrocyte membrane protein ...]	1
B7ZCP7;B7ZCP6;E9Q806;B7ZCP4;Q8C166;V9GWY2;V9GX86;B7ZCP8;B7ZCP5;A3KGK7 [Copine-1 ...]	1
B7ZCP7;B7ZCP6;E9Q806;B7ZCP4;Q8C166;V9GWY2;V9GX86;B7ZCP8;B7ZCP5;A3KGK7 [Copine-1 ...]	2
B7ZNJ1;A0A087WS56;B9EHT6;A0A087WSN6;Q3UHL6;A0A087WR50;P11276;Q4KL80;A0A087WSU6;A0A087WS99 [Fibronectin;Anastellin ...]	1
B7ZNJ1;A0A087WS56;B9EHT6;A0A087WSN6;Q3UHL6;A0A087WR50;P11276;Q4KL80;A0A087WSU6;A0A087WS99 [Fibronectin;Anastellin ...]	2
B8JJM5;F6VQX8;B8JJN0;P04186;F6XQ00;B8JJM6;H3BK95;B8JJM3;F6W2T4 [Complement factor B;Complement factor B Ba fragmen ...]	1
B8JJM5;F6VQX8;B8JJN0;P04186;F6XQ00;B8JJM6;H3BK95;B8JJM3;F6W2T4 [Complement factor B;Complement factor B Ba fragmen ...]	2
B8JK51;Q8K015 [Centromere protein O ...]	1
B8JK51;Q8K015 [Centromere protein O ...]	2
CON__A2A4G1;B1AQ77;Q61414;CON__Q99456 [Keratin, type I cytoskeletal 15 ...]	1
CON__A2A4G1;B1AQ77;Q61414;CON__Q99456 [Keratin, type I cytoskeletal 15 ...]	2
CON__ENSEMBL:ENSBTAP00000038253 [ ...]	1
CON__ENSEMBL:ENSBTAP00000038253 [ ...]	2
CON__P00761 [ ...]	1
CON__P00761 [ ...]	2
CON__P01966;A7M7S6;P06467 [ ...]	1
CON__P01966;A7M7S6;P06467 [ ...]	2
CON__P02533;Q61781 [Keratin, type I cytoskeletal 14 ...]	1
CON__P02533;Q61781 [Keratin, type I cytoskeletal 14 ...]	2
CON__P02538;CON__Q8VED5;Q8VED5;CON__Q14CN4-1 [ ...]	1
CON__P02538;CON__Q8VED5;Q8VED5;CON__Q14CN4-1 [ ...]	2
CON__P02768-1 [ ...]	1
CON__P02768-1 [ ...]	2
CON__P02769 [ ...]	1
CON__P02769 [ ...]	2
CON__P04264 [ ...]	1
CON__P04264 [ ...]	2
CON__P05784;P05784 [Keratin, type I cytoskeletal 18 ...]	1
CON__P05784;P05784 [Keratin, type I cytoskeletal 18 ...]	2
CON__P07744;P07744 [Keratin, type II cytoskeletal 4 ...]	1
CON__P07744;P07744 [Keratin, type II cytoskeletal 4 ...]	2
CON__P08727 [ ...]	1
CON__P08727 [ ...]	2
CON__P08730-1;P08730 [Keratin, type I cytoskeletal 13 ...]	1
CON__P08730-1;P08730 [Keratin, type I cytoskeletal 13 ...]	2
CON__P08779;CON__Q9Z2K1;CON__Q3ZAW8;Q9Z2K1;Q9WTL4 [Keratin, type I cytoskeletal 16 ...]	1
CON__P08779;CON__Q9Z2K1;CON__Q3ZAW8;Q9Z2K1;Q9WTL4 [Keratin, type I cytoskeletal 16 ...]	2
CON__P13645;CON__Q7Z3Y7;CON__Q7Z3Z0;CON__Q7Z3Y8;CON__Q148H6;CON__Q2M2I5 [ ...]	1
CON__P13645;CON__Q7Z3Y7;CON__Q7Z3Z0;CON__Q7Z3Y8;CON__Q148H6;CON__Q2M2I5 [ ...]	2
CON__P13647 [ ...]	1
CON__P13647 [ ...]	2
CON__P19001;P19001 [Keratin, type I cytoskeletal 19 ...]	1
CON__P19001;P19001 [Keratin, type I cytoskeletal 19 ...]	2
CON__P19012 [ ...]	1
CON__P19012 [ ...]	2
CON__P35527 [ ...]	1
CON__P35527 [ ...]	2
CON__P35908 [ ...]	1
CON__P35908 [ ...]	2
CON__P48668;CON__P04259 [ ...]	1
CON__P48668;CON__P04259 [ ...]	2
CON__P50446;P50446;Q3UV11;Q9Z331 [Keratin, type II cytoskeletal 6A;Keratin, type II ...]	1
CON__P50446;P50446;Q3UV11;Q9Z331 [Keratin, type II cytoskeletal 6A;Keratin, type II ...]	2
CON__Q04695;CON__Q9QWL7;Q9QWL7;CON__Q61782;CON__P35900;CON__Q8N1A0;CON__Q9C075;CON__Q99PS0;Q99PS0 [Keratin, type I cytoskeletal 17 ...]	1
CON__Q04695;CON__Q9QWL7;Q9QWL7;CON__Q61782;CON__P35900;CON__Q8N1A0;CON__Q9C075;CON__Q99PS0;Q99PS0 [Keratin, type I cytoskeletal 17 ...]	2
CON__Q6IFZ6;Q6IFZ6;CON__Q7Z794 [Keratin, type II cytoskeletal 1b ...]	1
CON__Q6IFZ6;Q6IFZ6;CON__Q7Z794 [Keratin, type II cytoskeletal 1b ...]	2
CON__Q6IME9;Q6IME9 [Keratin, type II cytoskeletal 72 ...]	1
CON__Q6IME9;Q6IME9 [Keratin, type II cytoskeletal 72 ...]	2
CON__Q86YZ3 [ ...]	1
CON__Q86YZ3 [ ...]	2
CON__Q922U2;Q922U2 [Keratin, type II cytoskeletal 5 ...]	1
CON__Q922U2;Q922U2 [Keratin, type II cytoskeletal 5 ...]	2
CON__Q9D312;Q9D312 [Keratin, type I cytoskeletal 20 ...]	1
CON__Q9D312;Q9D312 [Keratin, type I cytoskeletal 20 ...]	2
CON__Q9D646;CON__A2A5Y0;Q9D646;Q8K0Y2;Q61765;CON__O76011;CON__Q6NTB9;CON__Q14525;CON__O76009;CON__Q9UE12;CON__Q15323;CON__Q8IUT8;CON__O76014;CON__REFSEQ:XP_986630;Q61897 [Keratin, type I cuticular Ha4;Keratin, type I cuti ...]	1
CON__Q9D646;CON__A2A5Y0;Q9D646;Q8K0Y2;Q61765;CON__O76011;CON__Q6NTB9;CON__Q14525;CON__O76009;CON__Q9UE12;CON__Q15323;CON__Q8IUT8;CON__O76014;CON__REFSEQ:XP_986630;Q61897 [Keratin, type I cuticular Ha4;Keratin, type I cuti ...]	2
CON__Q9DCV7;Q9DCV7;CON__Q3KNV1;CON__P08729;D3Z6N5;CON__Q9NSB2;CON__Q6ISB0;CON__Q6KB66-1;G5E846;A0A2R8W6R6;G3X981;P15331 [Keratin, type II cytoskeletal 7 ...]	1
CON__Q9DCV7;Q9DCV7;CON__Q3KNV1;CON__P08729;D3Z6N5;CON__Q9NSB2;CON__Q6ISB0;CON__Q6KB66-1;G5E846;A0A2R8W6R6;G3X981;P15331 [Keratin, type II cytoskeletal 7 ...]	2
CON__Q9NSB4;Q99M74 [Keratin, type II cuticular Hb2 ...]	1
CON__Q9NSB4;Q99M74 [Keratin, type II cuticular Hb2 ...]	2
D3YTY9;A0A0R4J038;O08677;D3Z2B2 [Kininogen-1;Kininogen-1 heavy chain;Bradykinin;Kin ...]	1
D3YTY9;A0A0R4J038;O08677;D3Z2B2 [Kininogen-1;Kininogen-1 heavy chain;Bradykinin;Kin ...]	2
D3YU32 [ ...]	1
D3YU32 [ ...]	2
D3YV69;P61294;P35279 [Ras-related protein Rab-6B;Ras-related protein Rab ...]	2
D3YVB4;D3Z712;F8WJ41;P62245 [40S ribosomal protein S15a ...]	1
D3YVB4;D3Z712;F8WJ41;P62245 [40S ribosomal protein S15a ...]	2
D3YVG1;D3Z3V3;P42209 [Septin-1 ...]	1
D3YVG1;D3Z3V3;P42209 [Septin-1 ...]	2
D3YWF6;Q7TQI3;D3Z7K0 [Ubiquitin thioesterase OTUB1 ...]	1
D3YWF6;Q7TQI3;D3Z7K0 [Ubiquitin thioesterase OTUB1 ...]	2
D3YWL1;D3YW33;P35276 [Ras-related protein Rab-3D ...]	1
D3YWL1;D3YW33;P35276 [Ras-related protein Rab-3D ...]	2
D3YX76;P15626 [Glutathione S-transferase Mu 2 ...]	1
D3YX76;P15626 [Glutathione S-transferase Mu 2 ...]	2
D3YY36;Q9DBD0;F6W4D3 [Inhibitor of carbonic anhydrase ...]	1
D3YY36;Q9DBD0;F6W4D3 [Inhibitor of carbonic anhydrase ...]	2
D3YYH3;D3YUE8;D3Z223;P15327 [Phosphoglycerate mutase;Bisphosphoglycerate mutase ...]	1
D3YYH3;D3YUE8;D3Z223;P15327 [Phosphoglycerate mutase;Bisphosphoglycerate mutase ...]	2
D3Z124;D3Z6R9;P28352 [DNA-(apurinic or apyrimidinic site) lyase;DNA-(apu ...]	1
D3Z1A9;D3Z313;Q9DCC5;P23198 [Chromobox protein homolog 3 ...]	1
D3Z1A9;D3Z313;Q9DCC5;P23198 [Chromobox protein homolog 3 ...]	2
D3Z1H8;D3Z1H9;Q9JL62 [Glycolipid transfer protein ...]	1
D3Z1H8;D3Z1H9;Q9JL62 [Glycolipid transfer protein ...]	2
D3Z1T4;D3Z1M1;D3YZX3;E9QKR0;P62880;H3BLF7;H3BKR2;P29387;P62874;E9PWM7;Q61011 [Guanine nucleotide-binding protein G(I)/G(S)/G(T) ...]	1
D3Z1T4;D3Z1M1;D3YZX3;E9QKR0;P62880;H3BLF7;H3BKR2;P29387;P62874;E9PWM7;Q61011 [Guanine nucleotide-binding protein G(I)/G(S)/G(T) ...]	2
D3Z1V4;P70296 [Phosphatidylethanolamine-binding protein 1;Hippoca ...]	1
D3Z1V4;P70296 [Phosphatidylethanolamine-binding protein 1;Hippoca ...]	2
D3Z1Z8;D3Z5N2;P54227;P55821 [Stathmin;Stathmin-2 ...]	1
D3Z1Z8;D3Z5N2;P54227;P55821 [Stathmin;Stathmin-2 ...]	2
D3Z2H9;E9Q5J9 [ ...]	1
D3Z2H9;E9Q5J9 [ ...]	2
D3Z2U2;D3Z637;D3Z125;E9PUA7;D3Z7X7;F8WHQ1;Q62393 [Tumor protein D52 ...]	1
D3Z2U2;D3Z637;D3Z125;E9PUA7;D3Z7X7;F8WHQ1;Q62393 [Tumor protein D52 ...]	2
D3Z3G6;Q63844;D3Z6D8;A0A0U1RPX4;A0A0U1RPZ0 [Mitogen-activated protein kinase;Mitogen-activated ...]	2
D3Z4N2;F8WIP8;P10923 [Osteopontin ...]	1
D3Z4N2;F8WIP8;P10923 [Osteopontin ...]	2
D3Z6F5;Q03265;Q831A3 [ATP synthase subunit alpha;ATP synthase subunit al ...]	1
D3Z6F5;Q03265;Q831A3 [ATP synthase subunit alpha;ATP synthase subunit al ...]	2
D3Z6I8;E9Q7Q3;A0A0R4J1P2;P21107;D3YVR0;A2AIM5;S4R2U0;G5E8R0;E9Q453;G5E8R2;G5E8R1;E9Q456;E9Q455;E9Q452;Q8BSH3;Q8BP43;E9Q450;E9Q448;CON__Q3SX28;B7ZNL3;A2AIM4;E9Q454;F8WID5;P58774;P58771 [Tropomyosin alpha-3 chain ...]	1
D3Z6I8;E9Q7Q3;A0A0R4J1P2;P21107;D3YVR0;A2AIM5;S4R2U0;G5E8R0;E9Q453;G5E8R2;G5E8R1;E9Q456;E9Q455;E9Q452;Q8BSH3;Q8BP43;E9Q450;E9Q448;CON__Q3SX28;B7ZNL3;A2AIM4;E9Q454;F8WID5;P58774;P58771 [Tropomyosin alpha-3 chain ...]	2
D3Z789;D3Z6Z0;Q78ZM0;O70492 [Sorting nexin-3 ...]	1
D3Z789;D3Z6Z0;Q78ZM0;O70492 [Sorting nexin-3 ...]	2
D6RFU9;O09117 [Synaptophysin-like protein 1 ...]	1
D6RGU3;Q5SRI3;Q8C3J5 [Dedicator of cytokinesis protein 2 ...]	2
E9PUM5;E9Q8B6;E9Q8B5;Q61405 [ ...]	1
E9PUM5;E9Q8B6;E9Q8B5;Q61405 [ ...]	2
E9PUZ8;P08607 [C4b-binding protein ...]	1
E9PUZ8;P08607 [C4b-binding protein ...]	2
E9PV24;CON__P02672 [Fibrinogen alpha chain;Fibrinopeptide A;Fibrinogen ...]	1
E9PV24;CON__P02672 [Fibrinogen alpha chain;Fibrinopeptide A;Fibrinogen ...]	2
E9PWE9;P48025 [Tyrosine-protein kinase;Tyrosine-protein kinase SY ...]	1
E9PWE9;P48025 [Tyrosine-protein kinase;Tyrosine-protein kinase SY ...]	2
E9PWU4;Q60994 [Adiponectin ...]	1
E9PWU4;Q60994 [Adiponectin ...]	2
E9PYF1;Q8VCT3 [Aminopeptidase B ...]	1
E9PYF1;Q8VCT3 [Aminopeptidase B ...]	2
E9PZ00;Q8BFQ1;K3W4L3;J3QPG5;Q61207 [Prosaposin ...]	1
E9PZ00;Q8BFQ1;K3W4L3;J3QPG5;Q61207 [Prosaposin ...]	2
E9PZC3;Q923D2;E9PZC4;A0A0U1RPU7 [Flavin reductase (NADPH) ...]	1
E9PZC3;Q923D2;E9PZC4;A0A0U1RPU7 [Flavin reductase (NADPH) ...]	2
E9PZF0;Q01768;Q5NC79 [Nucleoside diphosphate kinase;Nucleoside diphospha ...]	1
E9PZF0;Q01768;Q5NC79 [Nucleoside diphosphate kinase;Nucleoside diphospha ...]	2
E9PZW0;E9Q557 [Desmoplakin ...]	1
E9PZW0;E9Q557 [Desmoplakin ...]	2
E9Q156 [tRNA (guanine-N(7)-)-methyltransferase non-catalyt ...]	1
E9Q1Y9;CON__Q61726;Q9ERE2;P97861;Q6IMF0;CON__P78386;Q9Z2T6;CON__O43790;CON__Q6NT21;CON__P78385;CON__Q14533 [Keratin, type II cuticular Hb1;Keratin, type II cu ...]	1
E9Q1Y9;CON__Q61726;Q9ERE2;P97861;Q6IMF0;CON__P78386;Q9Z2T6;CON__O43790;CON__Q6NT21;CON__P78385;CON__Q14533 [Keratin, type II cuticular Hb1;Keratin, type II cu ...]	2
E9Q1Z0 [ ...]	1
E9Q1Z0 [ ...]	2
E9Q397;Q3UGX2;P15508 [Spectrin beta chain, erythrocytic ...]	1
E9Q3E1;F6QPV9;J3QMK6 [Aldehyde dehydrogenase ...]	1
E9Q3E1;F6QPV9;J3QMK6 [Aldehyde dehydrogenase ...]	2
E9Q3W4;Q9QXS1;A0A3B2W7J8;A0A2I3BRT4;Q8R0W0 [Plectin ...]	1
E9Q3W4;Q9QXS1;A0A3B2W7J8;A0A2I3BRT4;Q8R0W0 [Plectin ...]	2
E9Q3X0;Q9EQK5 [Major vault protein ...]	1
E9Q3X0;Q9EQK5 [Major vault protein ...]	2
E9Q3Z4;Q3TRM8;E9Q8S8;D6RFA3;P52792 [Hexokinase;Hexokinase-3 ...]	1
E9Q3Z4;Q3TRM8;E9Q8S8;D6RFA3;P52792 [Hexokinase;Hexokinase-3 ...]	2
E9Q499;F2Z405;Q5I2A0 [Serine protease inhibitor A3G ...]	1
E9Q499;F2Z405;Q5I2A0 [Serine protease inhibitor A3G ...]	2
E9Q604;G5E8F1;E9Q5K8;Q3U1U4;P05555;A0A0R4J1B4 [Integrin alpha-M ...]	1
E9Q604;G5E8F1;E9Q5K8;Q3U1U4;P05555;A0A0R4J1B4 [Integrin alpha-M ...]	2
E9Q616;A0A494BBD5 [ ...]	1
E9Q616;A0A494BBD5 [ ...]	2
E9Q8I0;P06909;D6RGQ0;E9Q8H9;A0A0A6YWP4;A0A0A6YVP8 [Complement factor H ...]	1
E9Q8I0;P06909;D6RGQ0;E9Q8H9;A0A0A6YWP4;A0A0A6YVP8 [Complement factor H ...]	2
E9Q9J4;Q6ZQB6 [Inositol hexakisphosphate and diphosphoinositol-pe ...]	2
E9QAY6;A0A0U1RP81;E9Q800;Q8CAQ8 [MICOS complex subunit Mic60 ...]	1
E9QAY6;A0A0U1RP81;E9Q800;Q8CAQ8 [MICOS complex subunit Mic60 ...]	2
E9QK48;Q7TNG5 [Echinoderm microtubule-associated protein-like 2 ...]	1
E9QK48;Q7TNG5 [Echinoderm microtubule-associated protein-like 2 ...]	2
E9QN08;A0A0R4J1L2;Q91VK2;Q80T06;P57776;D3Z7N2;D3YY68;D3YUQ9;D3YZT9;F6ZFU0;A0A0R4J1E2 [Elongation factor 1-delta ...]	1
E9QN08;A0A0R4J1L2;Q91VK2;Q80T06;P57776;D3Z7N2;D3YY68;D3YUQ9;D3YZT9;F6ZFU0;A0A0R4J1E2 [Elongation factor 1-delta ...]	2
F6Q2E3;A0A087WPH7;A2AGN7;B7ZCF1;O88685 [26S protease regulatory subunit 6A ...]	2
F6QYF8;Q11011;E9Q039 [Puromycin-sensitive aminopeptidase ...]	1
F6QYF8;Q11011;E9Q039 [Puromycin-sensitive aminopeptidase ...]	2
F6SHF3;F6ZV59;G5E8G0;G3X9W0;Q60668 [Heterogeneous nuclear ribonucleoprotein D0 ...]	1
F6T0D3 [ ...]	2
F6TVP2;Q60710;E9PYG9 [Deoxynucleoside triphosphate triphosphohydrolase S ...]	1
F6TVP2;Q60710;E9PYG9 [Deoxynucleoside triphosphate triphosphohydrolase S ...]	2
F6UFG6;D3YYE1;D3Z7M9;O35381;Q9EST5;Q64G17 [Acidic leucine-rich nuclear phosphoprotein 32 fami ...]	1
F6UFG6;D3YYE1;D3Z7M9;O35381;Q9EST5;Q64G17 [Acidic leucine-rich nuclear phosphoprotein 32 fami ...]	2
F6W0I8;Q8K2J1;A0A0R4J0W4;Q8CI85 [Carbonic anhydrase 12 ...]	1
F6W0I8;Q8K2J1;A0A0R4J0W4;Q8CI85 [Carbonic anhydrase 12 ...]	2
F6W322;B8JK33;B8JK32;Q9D0E1;A0A3Q4EH91 [Heterogeneous nuclear ribonucleoprotein M ...]	1
F6W322;B8JK33;B8JK32;Q9D0E1;A0A3Q4EH91 [Heterogeneous nuclear ribonucleoprotein M ...]	2
F6XVM5;A0A338P776;Q9DB20 [ATP synthase subunit O, mitochondrial ...]	1
F6XVM5;A0A338P776;Q9DB20 [ATP synthase subunit O, mitochondrial ...]	2
F6YHE5 [ ...]	1
F6YHE5 [ ...]	2
F6YY19;P58501 [PAX3- and PAX7-binding protein 1 ...]	1
F6ZKZ3;Q9R112;H3BLH2 [Sulfide:quinone oxidoreductase, mitochondrial ...]	1
F6ZKZ3;Q9R112;H3BLH2 [Sulfide:quinone oxidoreductase, mitochondrial ...]	2
F6ZSB7;Q61753 [D-3-phosphoglycerate dehydrogenase ...]	1
F6ZSB7;Q61753 [D-3-phosphoglycerate dehydrogenase ...]	2
F6ZTG3;E9Q197;Q9CPV4 [Glyoxalase domain-containing protein 4 ...]	1
F6ZTG3;E9Q197;Q9CPV4 [Glyoxalase domain-containing protein 4 ...]	2
F7BP55;Q9WTP6 [Adenylate kinase 2, mitochondrial;Adenylate kinase ...]	1
F7BP55;Q9WTP6 [Adenylate kinase 2, mitochondrial;Adenylate kinase ...]	2
F7BYZ4;Q9JI11 [Serine/threonine-protein kinase 4;Serine/threonine ...]	1
F7C106;A0A0A6YVR0;Q9D881;P19536 [Cytochrome c oxidase subunit 5B, mitochondrial ...]	1
F7C106;A0A0A6YVR0;Q9D881;P19536 [Cytochrome c oxidase subunit 5B, mitochondrial ...]	2
F7CAZ6;A2AMW0;P47757;A0A0A0MQI9;F6YHZ8 [F-actin-capping protein subunit beta ...]	1
F7CAZ6;A2AMW0;P47757;A0A0A0MQI9;F6YHZ8 [F-actin-capping protein subunit beta ...]	2
F8WGL3;P18760;A0A494B9A7 [Cofilin-1 ...]	1
F8WGL3;P18760;A0A494B9A7 [Cofilin-1 ...]	2
F8WGM5;Q64324 [Syntaxin-binding protein 2 ...]	1
F8WIR1;P18242;F6Y6L6;A0A1B0GT66 [Cathepsin D ...]	1
F8WIR1;P18242;F6Y6L6;A0A1B0GT66 [Cathepsin D ...]	2
F8WIT2;P14824 [Annexin;Annexin A6 ...]	1
F8WIT2;P14824 [Annexin;Annexin A6 ...]	2
F8WIV2;Q60854;E9PYY0;E9Q3Y1;E9Q6X2;E9Q108;E9Q0P9;K7E6F1;E9PZQ9;E9Q4R2 [Serpin B6 ...]	1
F8WIV2;Q60854;E9PYY0;E9Q3Y1;E9Q6X2;E9Q108;E9Q0P9;K7E6F1;E9PZQ9;E9Q4R2 [Serpin B6 ...]	2
F8WJ05;Q61702 [Inter-alpha-trypsin inhibitor heavy chain H1 ...]	1
F8WJ05;Q61702 [Inter-alpha-trypsin inhibitor heavy chain H1 ...]	2
G3UWN9;G3UXY0;G3UXZ5;P97371;G3X9K9 [Proteasome activator complex subunit 1 ...]	1
G3UWN9;G3UXY0;G3UXZ5;P97371;G3X9K9 [Proteasome activator complex subunit 1 ...]	2
G3UWY2;Q07174 [Mitogen-activated protein kinase kinase kinase 8 ...]	1
G3UWY2;Q07174 [Mitogen-activated protein kinase kinase kinase 8 ...]	2
G3UX26;Q60930;D3YZT5;A0A286YCR8;D3YUN8 [Voltage-dependent anion-selective channel protein ...]	1
G3UX26;Q60930;D3YZT5;A0A286YCR8;D3YUN8 [Voltage-dependent anion-selective channel protein ...]	2
G3UY11;G5E8J2;B7ZW98;E9QNT8;G8JL84;D3YTV8;D3Z5M4;Q0VGY9;A0A0R4J1N7;Q02357;D6RJ51;F7D1P5 [Ankyrin-1 ...]	1
G3UY11;G5E8J2;B7ZW98;E9QNT8;G8JL84;D3YTV8;D3Z5M4;Q0VGY9;A0A0R4J1N7;Q02357;D6RJ51;F7D1P5 [Ankyrin-1 ...]	2
G3UY13;E9Q6I2;Q61730 [Interleukin-1 receptor accessory protein ...]	1
G3UY13;E9Q6I2;Q61730 [Interleukin-1 receptor accessory protein ...]	2
G3UY29;E9Q3P9;F8WGS1;P62492;P46638;G3UZD3;G3UZL4;D3YYB3 [Ras-related protein Rab-11A;Ras-related protein Ra ...]	1
G3UY29;E9Q3P9;F8WGS1;P62492;P46638;G3UZD3;G3UZL4;D3YYB3 [Ras-related protein Rab-11A;Ras-related protein Ra ...]	2
G3UYI4;G3UYL3;Q8BG32 [26S proteasome non-ATPase regulatory subunit 11 ...]	1
G3UYI4;G3UYL3;Q8BG32 [26S proteasome non-ATPase regulatory subunit 11 ...]	2
G3UYL6;G3UX05;Q99L20;G3UYJ7 [ ...]	1
G3UYL6;G3UX05;Q99L20;G3UYJ7 [ ...]	2
G3UYV7;P62858 [40S ribosomal protein S28 ...]	1
G3UYV7;P62858 [40S ribosomal protein S28 ...]	2
G3UZ22;G3UY93;Q9Z1Q9 [Valine--tRNA ligase ...]	2
G3X8T9;Q91WP6;H7BWY0;Q6P4P1 [Serine protease inhibitor A3N ...]	1
G3X8T9;Q91WP6;H7BWY0;Q6P4P1 [Serine protease inhibitor A3N ...]	2
G3X920;Q9DBR3 [Armadillo repeat-containing protein 8 ...]	1
G3X920;Q9DBR3 [Armadillo repeat-containing protein 8 ...]	2
G3X977;Q61703;Q3UEG7;CON__Q9TRI1 [Inter-alpha-trypsin inhibitor heavy chain H2 ...]	1
G3X977;Q61703;Q3UEG7;CON__Q9TRI1 [Inter-alpha-trypsin inhibitor heavy chain H2 ...]	2
G3X9D9;P48997 [Involucrin ...]	1
G3X9D9;P48997 [Involucrin ...]	2
G3X9T8;G3X8Q5;E9PZD8;Q61147;G3UXG1;G3UWP5;G3UZ53 [Ceruloplasmin ...]	1
G3X9T8;G3X8Q5;E9PZD8;Q61147;G3UXG1;G3UWP5;G3UZ53 [Ceruloplasmin ...]	2
G3X9V0;P97372 [Proteasome activator complex subunit 2 ...]	1
G3X9V0;P97372 [Proteasome activator complex subunit 2 ...]	2
G5DDB7;Q8R3B1 [Phosphoinositide phospholipase C;1-phosphatidylino ...]	1
G5DDB7;Q8R3B1 [Phosphoinositide phospholipase C;1-phosphatidylino ...]	2
G5E839;P80315 [T-complex protein 1 subunit delta ...]	1
G5E839;P80315 [T-complex protein 1 subunit delta ...]	2
G5E850;P56395;E0CY88 [Cytochrome b5 ...]	1
G5E850;P56395;E0CY88 [Cytochrome b5 ...]	2
G5E902;Q8VEM8 [Phosphate carrier protein, mitochondrial ...]	1
G5E902;Q8VEM8 [Phosphate carrier protein, mitochondrial ...]	2
H3BJP2;H3BK43;H3BLJ9;H3BJL6;H3BKH6;Q9R0P3 [S-formylglutathione hydrolase ...]	1
H3BJP2;H3BK43;H3BLJ9;H3BJL6;H3BKH6;Q9R0P3 [S-formylglutathione hydrolase ...]	2
H3BJQ7;P99029;A0A494BAZ4;G3UZJ4 [Peroxiredoxin-5, mitochondrial ...]	1
H3BJQ7;P99029;A0A494BAZ4;G3UZJ4 [Peroxiredoxin-5, mitochondrial ...]	2
H3BK03;P52430;H3BLB8 [Serum paraoxonase/arylesterase 1 ...]	1
H3BK03;P52430;H3BLB8 [Serum paraoxonase/arylesterase 1 ...]	2
H3BKI8;A0A286YDM3;H3BK96;H3BKD0;B2M1R6;P61979;A0A286YCM2;H3BLL4;A0A286YEC4;A0A286YE41;H3BJ43;H3BJS9;Q8BT23;A0A286YDH1 [Heterogeneous nuclear ribonucleoprotein K ...]	1
H3BKI8;A0A286YDM3;H3BK96;H3BKD0;B2M1R6;P61979;A0A286YCM2;H3BLL4;A0A286YEC4;A0A286YE41;H3BJ43;H3BJS9;Q8BT23;A0A286YDH1 [Heterogeneous nuclear ribonucleoprotein K ...]	2
H3BKL7;E9Q797;P49183;D3YXC7 [Deoxyribonuclease-1 ...]	1
H3BKL7;E9Q797;P49183;D3YXC7 [Deoxyribonuclease-1 ...]	2
H7BWY6;Q00724;A0A494B9P3;A0A494B9T2 [Retinol-binding protein 4 ...]	1
H7BWY6;Q00724;A0A494B9P3;A0A494B9T2 [Retinol-binding protein 4 ...]	2
H7BX22;P34022 [Ran-specific GTPase-activating protein ...]	1
H7BX22;P34022 [Ran-specific GTPase-activating protein ...]	2
H7C7A0 [ ...]	1
H7C7A0 [ ...]	2
I7HLV2;Q6ZWV3;P86048;A0A1B0GXC3 [60S ribosomal protein L10;60S ribosomal protein L1 ...]	1
I7HLV2;Q6ZWV3;P86048;A0A1B0GXC3 [60S ribosomal protein L10;60S ribosomal protein L1 ...]	2
I7HPY0;Q91VW3 [SH3 domain-binding glutamic acid-rich-like protein ...]	1
I7HPY0;Q91VW3 [SH3 domain-binding glutamic acid-rich-like protein ...]	2
J3QJU0;Q68SN8 [Fc receptor-like protein 5 ...]	1
J3QP71;K3W4Q8;P18572 [Basigin ...]	1
J3QP71;K3W4Q8;P18572 [Basigin ...]	2
K3W4R2;Q6URW6;A0A140LHX1 [Myosin-14 ...]	1
K3W4R2;Q6URW6;A0A140LHX1 [Myosin-14 ...]	2
K4DI77;Q5ND34 [WD repeat-containing protein 81 ...]	2
K9J7B2;Q64435;D3YZE6;D3Z7G0;D3YZ96;G3UZC9;B2RT14;E9PXN7;D3Z748;Q62452;P70691;Q63886;D6RH94;D3YWN0;D3YUP6;Q8BJL9;Q91WH2;Q8VCN3;Q8K169;Q3UEP4;P17717 [UDP-glucuronosyltransferase 1-6;UDP-glucuronosyltr ...]	1
K9J7B2;Q64435;D3YZE6;D3Z7G0;D3YZ96;G3UZC9;B2RT14;E9PXN7;D3Z748;Q62452;P70691;Q63886;D6RH94;D3YWN0;D3YUP6;Q8BJL9;Q91WH2;Q8VCN3;Q8K169;Q3UEP4;P17717 [UDP-glucuronosyltransferase 1-6;UDP-glucuronosyltr ...]	2
M0QWU8;P31786 [Acyl-CoA-binding protein ...]	1
M0QWU8;P31786 [Acyl-CoA-binding protein ...]	2
O08439 [ ...]	1
O08439 [ ...]	2
O08553 [Dihydropyrimidinase-related protein 2 ...]	1
O08553 [Dihydropyrimidinase-related protein 2 ...]	2
O08692 [Neutrophilic granule protein ...]	1
O08692 [Neutrophilic granule protein ...]	2
O08997 [Copper transport protein ATOX1 ...]	1
O08997 [Copper transport protein ATOX1 ...]	2
O09043 [Napsin-A ...]	1
O09043 [Napsin-A ...]	2
O09114 [Prostaglandin-H2 D-isomerase ...]	1
O09114 [Prostaglandin-H2 D-isomerase ...]	2
O09131;A0A494BAB1;A0A494B9X6;A0A494BAY2;A0A494BB82;Q8K2Q2 [Glutathione S-transferase omega-1 ...]	1
O09131;A0A494BAB1;A0A494B9X6;A0A494BAY2;A0A494BB82;Q8K2Q2 [Glutathione S-transferase omega-1 ...]	2
O35239 [Tyrosine-protein phosphatase non-receptor type 9 ...]	1
O35594 [Intraflagellar transport protein 81 homolog ...]	2
O35639;Q3TET3;A0A0G2JDV9;A0A0G2JGL7 [Annexin A3 ...]	1
O35639;Q3TET3;A0A0G2JDV9;A0A0G2JGL7 [Annexin A3 ...]	2
O35744;F6RU51 [Chitinase-like protein 3 ...]	1
O35744;F6RU51 [Chitinase-like protein 3 ...]	2
O35945 [Aldehyde dehydrogenase, cytosolic 1 ...]	1
O35945 [Aldehyde dehydrogenase, cytosolic 1 ...]	2
O55022 [Membrane-associated progesterone receptor componen ...]	1
O55022 [Membrane-associated progesterone receptor componen ...]	2
O55042;Q91ZZ3 [Alpha-synuclein;Beta-synuclein ...]	1
O55042;Q91ZZ3 [Alpha-synuclein;Beta-synuclein ...]	2
O55142 [60S ribosomal protein L35a ...]	1
O55142 [60S ribosomal protein L35a ...]	2
O55234;Q8BTY5 [Proteasome subunit beta type-5 ...]	1
O55234;Q8BTY5 [Proteasome subunit beta type-5 ...]	2
O70138 [Neutrophil collagenase ...]	1
O70138 [Neutrophil collagenase ...]	2
O70145;A0A087WPH0 [Neutrophil cytosol factor 2 ...]	1
O70145;A0A087WPH0 [Neutrophil cytosol factor 2 ...]	2
O70435;E0CZ34;F8WH02;E0CYL6;E0CX62 [Proteasome subunit alpha type-3 ...]	1
O70435;E0CZ34;F8WH02;E0CYL6;E0CX62 [Proteasome subunit alpha type-3 ...]	2
O70451 [Monocarboxylate transporter 2 ...]	2
O70456 [14-3-3 protein sigma ...]	1
O70456 [14-3-3 protein sigma ...]	2
O70475;D3YXP9 [UDP-glucose 6-dehydrogenase ...]	1
O70475;D3YXP9 [UDP-glucose 6-dehydrogenase ...]	2
O88342;A0A0J9YU05 [WD repeat-containing protein 1 ...]	1
O88342;A0A0J9YU05 [WD repeat-containing protein 1 ...]	2
O88536 [Formyl peptide receptor 2 ...]	1
O88536 [Formyl peptide receptor 2 ...]	2
O88569;A0A0N4SUM2 [Heterogeneous nuclear ribonucleoproteins A2/B1 ...]	1
O88569;A0A0N4SUM2 [Heterogeneous nuclear ribonucleoproteins A2/B1 ...]	2
O88593 [Peptidoglycan recognition protein 1 ...]	1
O88593 [Peptidoglycan recognition protein 1 ...]	2
O88844;A0A087WPT4;A0A087WRS9;D3YVY3;A0A087WRM4;A0A0U1RP68;D6RIL6;P54071 [Isocitrate dehydrogenase [NADP] cytoplasmic ...]	1
O88844;A0A087WPT4;A0A087WRS9;D3YVY3;A0A087WRM4;A0A0U1RP68;D6RIL6;P54071 [Isocitrate dehydrogenase [NADP] cytoplasmic ...]	2
O89020 [Afamin ...]	1
O89020 [Afamin ...]	2
O89053;G3UYK8;A0A0U1RPY8;D3YW57;G3UX53;D3YXM2 [Coronin-1A;Coronin ...]	1
O89053;G3UYK8;A0A0U1RPY8;D3YW57;G3UX53;D3YXM2 [Coronin-1A;Coronin ...]	2
P00329 [Alcohol dehydrogenase 1 ...]	1
P00329 [Alcohol dehydrogenase 1 ...]	2
P00405 [Cytochrome c oxidase subunit 2 ...]	1
P00405 [Cytochrome c oxidase subunit 2 ...]	2
P00493 [Hypoxanthine-guanine phosphoribosyltransferase ...]	2
P00688;CON__Q3MHH8;P00687 [Pancreatic alpha-amylase;Alpha-amylase 1 ...]	1
P00920;A0A0A6YX78 [Carbonic anhydrase 2 ...]	1
P00920;A0A0A6YX78 [Carbonic anhydrase 2 ...]	2
P01027;H3BKW9;H3BL60;CON__Q2UVX4 [Complement C3;Complement C3 beta chain;C3-beta-c;C ...]	1
P01027;H3BKW9;H3BL60;CON__Q2UVX4 [Complement C3;Complement C3 beta chain;C3-beta-c;C ...]	2
P01029 [Complement C4-B;Complement C4 beta chain;Complemen ...]	1
P01029 [Complement C4-B;Complement C4 beta chain;Complemen ...]	2
P01132;A0A0G2JDT8;A0A0G2JF92;A0A0G2JFB8 [Pro-epidermal growth factor;Epidermal growth facto ...]	1
P01132;A0A0G2JDT8;A0A0G2JF92;A0A0G2JFB8 [Pro-epidermal growth factor;Epidermal growth facto ...]	2
P01837 [Ig kappa chain C region ...]	1
P01837 [Ig kappa chain C region ...]	2
P01887 [Beta-2-microglobulin ...]	1
P01887 [Beta-2-microglobulin ...]	2
P01897;P01899;P01896 [H-2 class I histocompatibility antigen, L-D alpha ...]	1
P01897;P01899;P01896 [H-2 class I histocompatibility antigen, L-D alpha ...]	2
P01898;A0A494B9G2;A0A0B4J1G3;A0A494B9G8;E9PWT4;E9QJR9;P79568;E9PX63;Q8HWB2;A0A494BA33;A0A494BAT0;Q3TH01;O19441;A7VMS6;E9Q0G4;G3UXE9;P01895;P14430;P14428;P14429;P14426;P01900;P03991;P04223;P01901 [H-2 class I histocompatibility antigen, Q10 alpha ...]	1
P01898;A0A494B9G2;A0A0B4J1G3;A0A494B9G8;E9PWT4;E9QJR9;P79568;E9PX63;Q8HWB2;A0A494BA33;A0A494BAT0;Q3TH01;O19441;A7VMS6;E9Q0G4;G3UXE9;P01895;P14430;P14428;P14429;P14426;P01900;P03991;P04223;P01901 [H-2 class I histocompatibility antigen, Q10 alpha ...]	2
P03953 [Complement factor D ...]	1
P03953 [Complement factor D ...]	2
P03958 [Adenosine deaminase ...]	1
P03958 [Adenosine deaminase ...]	2
P04104 [Keratin, type II cytoskeletal 1 ...]	1
P04104 [Keratin, type II cytoskeletal 1 ...]	2
P04117;A0A0A6YW05;A0A0A6YXB9;A0A0A6YXI2;P24526;O08716 [Fatty acid-binding protein, adipocyte ...]	1
P04117;A0A0A6YW05;A0A0A6YXB9;A0A0A6YXI2;P24526;O08716 [Fatty acid-binding protein, adipocyte ...]	2
P04919 [Band 3 anion transport protein ...]	1
P04919 [Band 3 anion transport protein ...]	2
P05064;A6ZI44;Q9CPQ9;A6ZI46;D3Z510;A0A0U1RPN8;D3YWI1;D3YV98;A0A0U1RPT5;A6ZI47 [Fructose-bisphosphate aldolase A;Fructose-bisphosp ...]	1
P05064;A6ZI44;Q9CPQ9;A6ZI46;D3Z510;A0A0U1RPN8;D3YWI1;D3YV98;A0A0U1RPT5;A6ZI47 [Fructose-bisphosphate aldolase A;Fructose-bisphosp ...]	2
P05201 [Aspartate aminotransferase, cytoplasmic ...]	1
P05201 [Aspartate aminotransferase, cytoplasmic ...]	2
P05202 [Aspartate aminotransferase, mitochondrial ...]	1
P05202 [Aspartate aminotransferase, mitochondrial ...]	2
P05366;A0A1B0GQV5;P05367 [Serum amyloid A-1 protein;Serum amyloid A-2 protei ...]	1
P05366;A0A1B0GQV5;P05367 [Serum amyloid A-1 protein;Serum amyloid A-2 protei ...]	2
P06684 [Complement C5;Complement C5 beta chain;Complement ...]	1
P06684 [Complement C5;Complement C5 beta chain;Complement ...]	2
P06728 [Apolipoprotein A-IV ...]	1
P06728 [Apolipoprotein A-IV ...]	2
P06745;A0A0U1RQ72;A0A0U1RP97;CON__Q3ZBD7;A0A0U1RQ18 [Glucose-6-phosphate isomerase ...]	1
P06745;A0A0U1RQ72;A0A0U1RP97;CON__Q3ZBD7;A0A0U1RQ18 [Glucose-6-phosphate isomerase ...]	2
P06801;Q3TQP6 [NADP-dependent malic enzyme;Malic enzyme ...]	1
P06801;Q3TQP6 [NADP-dependent malic enzyme;Malic enzyme ...]	2
P07309 [Transthyretin ...]	1
P07309 [Transthyretin ...]	2
P07310;A0A0J9YKD4 [Creatine kinase M-type ...]	1
P07310;A0A0J9YKD4 [Creatine kinase M-type ...]	2
P07356;B0V2N8;B0V2N7;B0V2N5 [Annexin A2;Annexin ...]	1
P07356;B0V2N8;B0V2N7;B0V2N5 [Annexin A2;Annexin ...]	2
P07361 [Alpha-1-acid glycoprotein 2 ...]	1
P07361 [Alpha-1-acid glycoprotein 2 ...]	2
P07515 [ ...]	1
P07515 [ ...]	2
P07724 [Serum albumin ...]	1
P07724 [Serum albumin ...]	2
P07901;B7ZC50;A2A6A2;B7ZC49;REV__Q8BL66 [Heat shock protein HSP 90-alpha ...]	1
P07901;B7ZC50;A2A6A2;B7ZC49;REV__Q8BL66 [Heat shock protein HSP 90-alpha ...]	2
P08030;A0A1D5RLR6 [Adenine phosphoribosyltransferase ...]	1
P08030;A0A1D5RLR6 [Adenine phosphoribosyltransferase ...]	2
P08032 [Spectrin alpha chain, erythrocytic 1 ...]	1
P08032 [Spectrin alpha chain, erythrocytic 1 ...]	2
P08071;A0A0G2JDN0;A0A0G2JGN1;A0A0G2JFM6;A0A0G2JEA3 [Lactotransferrin ...]	1
P08071;A0A0G2JDN0;A0A0G2JGN1;A0A0G2JFM6;A0A0G2JEA3 [Lactotransferrin ...]	2
P08074;F6YNX9 [Carbonyl reductase [NADPH] 2 ...]	1
P08074;F6YNX9 [Carbonyl reductase [NADPH] 2 ...]	2
P08113;F7C312 [Endoplasmin ...]	1
P08113;F7C312 [Endoplasmin ...]	2
P08226;A0A1B0GX15;G3UWN5;G3UZM8 [Apolipoprotein E ...]	1
P08226;A0A1B0GX15;G3UWN5;G3UZM8 [Apolipoprotein E ...]	2
P08228 [Superoxide dismutase [Cu-Zn] ...]	1
P08228 [Superoxide dismutase [Cu-Zn] ...]	2
P08249;A0A0G2JF23;A0A0G2JGY4 [Malate dehydrogenase, mitochondrial ...]	1
P08249;A0A0G2JF23;A0A0G2JGY4 [Malate dehydrogenase, mitochondrial ...]	2
P08752;A0A0A6YWA9;B2RSH2;A2AE32;P20612;P18872;Q3V3I2;P50149;A2A610;A2AE31;Q8C040;D3Z2M7;Q8BHK8;F6QPU5;Z4YKV1;Q66L47;Q8CGK7;P63094;Q6R0H7 [Guanine nucleotide-binding protein G(i) subunit al ...]	1
P08752;A0A0A6YWA9;B2RSH2;A2AE32;P20612;P18872;Q3V3I2;P50149;A2A610;A2AE31;Q8C040;D3Z2M7;Q8BHK8;F6QPU5;Z4YKV1;Q66L47;Q8CGK7;P63094;Q6R0H7 [Guanine nucleotide-binding protein G(i) subunit al ...]	2
P08905;P17897 [Lysozyme C-2;Lysozyme C-1 ...]	1
P08905;P17897 [Lysozyme C-2;Lysozyme C-1 ...]	2
P09103;E9Q8G8 [Protein disulfide-isomerase ...]	1
P09103;E9Q8G8 [Protein disulfide-isomerase ...]	2
P09405 [Nucleolin ...]	1
P09405 [Nucleolin ...]	2
P09411;S4R2M7;P09041 [Phosphoglycerate kinase 1;Phosphoglycerate kinase ...]	1
P09411;S4R2M7;P09041 [Phosphoglycerate kinase 1;Phosphoglycerate kinase ...]	2
P09528;A0A494BA92;A0A494B9D4;A0A494BAP3 [Ferritin heavy chain;Ferritin heavy chain, N-termi ...]	1
P09528;A0A494BA92;A0A494B9D4;A0A494BAP3 [Ferritin heavy chain;Ferritin heavy chain, N-termi ...]	2
P09813 [Apolipoprotein A-II;Proapolipoprotein A-II ...]	1
P09813 [Apolipoprotein A-II;Proapolipoprotein A-II ...]	2
P0DM31 [ ...]	1
P0DM31 [ ...]	2
P0DOV2;A0A087WRA4;D0QMC3 [Myeloid cell nuclear differentiation antigen-like ...]	1
P0DOV2;A0A087WRA4;D0QMC3 [Myeloid cell nuclear differentiation antigen-like ...]	2
P0DP28;P0DP27;P0DP26;Q3UKW2;A0A3Q4EHJ0;A0A1Y7VK66;Q9D6P8;P20801 [Calmodulin-like protein 3 ...]	1
P0DP28;P0DP27;P0DP26;Q3UKW2;A0A3Q4EHJ0;A0A1Y7VK66;Q9D6P8;P20801 [Calmodulin-like protein 3 ...]	2
P10107;A0A494BBD8 [Annexin A1 ...]	1
P10107;A0A494BBD8 [Annexin A1 ...]	2
P10126;D3Z3I8;D3YZ68;P62631 [Elongation factor 1-alpha 1;Elongation factor 1-al ...]	1
P10126;D3Z3I8;D3YZ68;P62631 [Elongation factor 1-alpha 1;Elongation factor 1-al ...]	2
P10605 [Cathepsin B;Cathepsin B light chain;Cathepsin B he ...]	1
P10605 [Cathepsin B;Cathepsin B light chain;Cathepsin B he ...]	2
P10639 [Thioredoxin ...]	1
P10639 [Thioredoxin ...]	2
P10810 [Monocyte differentiation antigen CD14 ...]	1
P10810 [Monocyte differentiation antigen CD14 ...]	2
P10922 [Histone H1.0;Histone H1.0, N-terminally processed ...]	1
P11031 [Activated RNA polymerase II transcriptional coacti ...]	1
P11031 [Activated RNA polymerase II transcriptional coacti ...]	2
P11247;F7DC05;F8WGZ9;A0A0A0MQL9 [Myeloperoxidase;Myeloperoxidase light chain;Myelop ...]	1
P11247;F7DC05;F8WGZ9;A0A0A0MQL9 [Myeloperoxidase;Myeloperoxidase light chain;Myelop ...]	2
P11499;E9PX27;E9Q3D6;D3Z1R1;E9Q0C3 [Heat shock protein HSP 90-beta ...]	1
P11499;E9PX27;E9Q3D6;D3Z1R1;E9Q0C3 [Heat shock protein HSP 90-beta ...]	2
P11589 [Major urinary protein 2 ...]	1
P11589 [Major urinary protein 2 ...]	2
P11679;CON__Q9H552 [Keratin, type II cytoskeletal 8 ...]	1
P11679;CON__Q9H552 [Keratin, type II cytoskeletal 8 ...]	2
P11680 [Properdin ...]	1
P11680 [Properdin ...]	2
P11983 [T-complex protein 1 subunit alpha ...]	1
P11983 [T-complex protein 1 subunit alpha ...]	2
P12246 [Serum amyloid P-component ...]	1
P12246 [Serum amyloid P-component ...]	2
P12787 [Cytochrome c oxidase subunit 5A, mitochondrial ...]	1
P12787 [Cytochrome c oxidase subunit 5A, mitochondrial ...]	2
P12970 [60S ribosomal protein L7a ...]	1
P12970 [60S ribosomal protein L7a ...]	2
P13020;A0A0J9YUQ8;CON__Q3SX14;A6PWS5;A0A0J9YUJ8 [Gelsolin ...]	1
P13020;A0A0J9YUQ8;CON__Q3SX14;A6PWS5;A0A0J9YUJ8 [Gelsolin ...]	2
P13634;D3YYQ4 [Carbonic anhydrase 1 ...]	1
P13634;D3YYQ4 [Carbonic anhydrase 1 ...]	2
P14069 [Protein S100-A6 ...]	1
P14069 [Protein S100-A6 ...]	2
P14106 [Complement C1q subcomponent subunit B ...]	2
P14115 [60S ribosomal protein L27a ...]	1
P14115 [60S ribosomal protein L27a ...]	2
P14131 [40S ribosomal protein S16 ...]	1
P14131 [40S ribosomal protein S16 ...]	2
P14148;F6XI62 [60S ribosomal protein L7 ...]	1
P14148;F6XI62 [60S ribosomal protein L7 ...]	2
P14152 [Malate dehydrogenase, cytoplasmic ...]	1
P14152 [Malate dehydrogenase, cytoplasmic ...]	2
P14206;A0A1L1SRW0;A0A1L1SUK3 [40S ribosomal protein SA ...]	1
P14206;A0A1L1SRW0;A0A1L1SUK3 [40S ribosomal protein SA ...]	2
P14211 [Calreticulin ...]	1
P14211 [Calreticulin ...]	2
P14602;D3YZ06 [Heat shock protein beta-1 ...]	1
P14602;D3YZ06 [Heat shock protein beta-1 ...]	2
P14685;F7B7L8 [26S proteasome non-ATPase regulatory subunit 3 ...]	1
P14685;F7B7L8 [26S proteasome non-ATPase regulatory subunit 3 ...]	2
P14733;A0A0R4J0Q5;P21619 [Lamin-B1 ...]	1
P14733;A0A0R4J0Q5;P21619 [Lamin-B1 ...]	2
P14847 [C-reactive protein ...]	1
P14847 [C-reactive protein ...]	2
P15864;P43277;I7HFT9;Q07133 [Histone H1.2;Histone H1.3 ...]	1
P15864;P43277;I7HFT9;Q07133 [Histone H1.2;Histone H1.3 ...]	2
P15947;A0A0U1RPN5;P15945;P00757;Q61759;P15946 [Kallikrein-1 ...]	1
P15947;A0A0U1RPN5;P15945;P00757;Q61759;P15946 [Kallikrein-1 ...]	2
P16015 [Carbonic anhydrase 3 ...]	1
P16015 [Carbonic anhydrase 3 ...]	2
P16045 [Galectin-1 ...]	1
P16045 [Galectin-1 ...]	2
P16125;A0A0N4SVV8;D3Z7F0 [L-lactate dehydrogenase B chain;L-lactate dehydrog ...]	1
P16125;A0A0N4SVV8;D3Z7F0 [L-lactate dehydrogenase B chain;L-lactate dehydrog ...]	2
P17047 [Lysosome-associated membrane glycoprotein 2 ...]	1
P17156 [Heat shock-related 70 kDa protein 2 ...]	1
P17156 [Heat shock-related 70 kDa protein 2 ...]	2
P17182;Q6PHC1;B1ARR7;B0QZL1;A0A0N4SUI6;B1ARR6;Q5SX61;Q5SX60;D3YVD3;D3Z2S4;J3QPZ9;Q5SX59;D3Z6E4;A0A0N4SUX5;P17183 [Alpha-enolase ...]	1
P17182;Q6PHC1;B1ARR7;B0QZL1;A0A0N4SUI6;B1ARR6;Q5SX61;Q5SX60;D3YVD3;D3Z2S4;J3QPZ9;Q5SX59;D3Z6E4;A0A0N4SUX5;P17183 [Alpha-enolase ...]	2
P17563;Q63836;G3UYY2;A0A0R4J135;D6RHN2 [Selenium-binding protein 1;Selenium-binding protei ...]	1
P17563;Q63836;G3UYY2;A0A0R4J135;D6RHN2 [Selenium-binding protein 1;Selenium-binding protei ...]	2
P17742;A0A1L1SST0;V9GXC1;V9GX31 [Peptidyl-prolyl cis-trans isomerase A;Peptidyl-pro ...]	1
P17742;A0A1L1SST0;V9GXC1;V9GX31 [Peptidyl-prolyl cis-trans isomerase A;Peptidyl-pro ...]	2
P17751;H7BXC3 [Triosephosphate isomerase ...]	1
P17751;H7BXC3 [Triosephosphate isomerase ...]	2
P19221;H7BX99;CON__P00735 [Prothrombin;Activation peptide fragment 1;Activati ...]	1
P19221;H7BX99;CON__P00735 [Prothrombin;Activation peptide fragment 1;Activati ...]	2
P19783 [Cytochrome c oxidase subunit 4 isoform 1, mitochon ...]	1
P19783 [Cytochrome c oxidase subunit 4 isoform 1, mitochon ...]	2
P20029 [78 kDa glucose-regulated protein ...]	1
P20029 [78 kDa glucose-regulated protein ...]	2
P20065 [Thymosin beta-4;Hematopoietic system regulatory pe ...]	1
P20065 [Thymosin beta-4;Hematopoietic system regulatory pe ...]	2
P20152;A0A0A6YWC8;A2AKJ2;P31001;D3YZ35;A0A0R4J036;P46660;P08551;P08553 [Vimentin ...]	1
P20152;A0A0A6YWC8;A2AKJ2;P31001;D3YZ35;A0A0R4J036;P46660;P08551;P08553 [Vimentin ...]	2
P20918;CON__P06868 [Plasminogen;Plasmin heavy chain A;Activation pepti ...]	1
P20918;CON__P06868 [Plasminogen;Plasmin heavy chain A;Activation pepti ...]	2
P21550 [Beta-enolase ...]	1
P21550 [Beta-enolase ...]	2
P21614;A0A0G2JGM6 [Vitamin D-binding protein ...]	1
P21614;A0A0G2JGM6 [Vitamin D-binding protein ...]	2
P21981;G3UXE8 [Protein-glutamine gamma-glutamyltransferase 2 ...]	1
P21981;G3UXE8 [Protein-glutamine gamma-glutamyltransferase 2 ...]	2
P22599 [Alpha-1-antitrypsin 1-2 ...]	1
P22599 [Alpha-1-antitrypsin 1-2 ...]	2
P23116 [Eukaryotic translation initiation factor 3 subunit ...]	2
P23530 [ ...]	1
P23530 [ ...]	2
P23953;D3Z5G7;A0A1D5RM42;Q8VCT4;E9PYP1;Q8VCC2 [Carboxylesterase 1C ...]	1
P23953;D3Z5G7;A0A1D5RM42;Q8VCT4;E9PYP1;Q8VCC2 [Carboxylesterase 1C ...]	2
P24270;A2AL20 [Catalase ...]	1
P24270;A2AL20 [Catalase ...]	2
P24369 [Peptidyl-prolyl cis-trans isomerase B ...]	1
P24369 [Peptidyl-prolyl cis-trans isomerase B ...]	2
P24472;A0A1L1SS61 [Glutathione S-transferase A4 ...]	1
P24472;A0A1L1SS61 [Glutathione S-transferase A4 ...]	2
P24527 [Leukotriene A-4 hydrolase ...]	1
P24527 [Leukotriene A-4 hydrolase ...]	2
P25322 [G1/S-specific cyclin-D1 ...]	1
P25322 [G1/S-specific cyclin-D1 ...]	2
P25444;D3YVC1;D3YWJ3 [40S ribosomal protein S2 ...]	1
P25444;D3YVC1;D3YWJ3 [40S ribosomal protein S2 ...]	2
P26039;A2AIM2;E9PUM4;A0A1L1SQ51;Q8CDM9;Q71LX4;F6SX70;A0A1L1SRI1;F6S1V7;A0A1L1SQP9 [Talin-1 ...]	1
P26039;A2AIM2;E9PUM4;A0A1L1SQ51;Q8CDM9;Q71LX4;F6SX70;A0A1L1SRI1;F6S1V7;A0A1L1SQP9 [Talin-1 ...]	2
P26040 [Ezrin ...]	1
P26040 [Ezrin ...]	2
P26041;Q7TSG6 [Moesin ...]	1
P26041;Q7TSG6 [Moesin ...]	2
P26262 [Plasma kallikrein;Plasma kallikrein heavy chain;Pl ...]	1
P26262 [Plasma kallikrein;Plasma kallikrein heavy chain;Pl ...]	2
P26350;A0A087WP98;A0A087WPN6;A0A087WQN2 [Prothymosin alpha;Prothymosin alpha, N-terminally ...]	1
P26350;A0A087WP98;A0A087WPN6;A0A087WQN2 [Prothymosin alpha;Prothymosin alpha, N-terminally ...]	2
P26443 [Glutamate dehydrogenase 1, mitochondrial ...]	1
P26443 [Glutamate dehydrogenase 1, mitochondrial ...]	2
P26516 [26S proteasome non-ATPase regulatory subunit 7 ...]	1
P26516 [26S proteasome non-ATPase regulatory subunit 7 ...]	2
P27005 [Protein S100-A8 ...]	1
P27005 [Protein S100-A8 ...]	2
P27048;P63163;A0A0G2JGN4 [Small nuclear ribonucleoprotein-associated protein ...]	1
P27048;P63163;A0A0G2JGN4 [Small nuclear ribonucleoprotein-associated protein ...]	2
P27773;F6Q404 [Protein disulfide-isomerase A3 ...]	1
P27773;F6Q404 [Protein disulfide-isomerase A3 ...]	2
P28293 [Cathepsin G ...]	1
P28293 [Cathepsin G ...]	2
P28650;J3QN31 [Adenylosuccinate synthetase isozyme 1 ...]	1
P28650;J3QN31 [Adenylosuccinate synthetase isozyme 1 ...]	2
P28665;P28666;A0A0N4SVU1;CON__ENSEMBL:ENSBTAP00000024146 [Murinoglobulin-1 ...]	1
P28665;P28666;A0A0N4SVU1;CON__ENSEMBL:ENSBTAP00000024146 [Murinoglobulin-1 ...]	2
P28867;Q1MX41;Q1MX43;Q1MX40;Q1MX42;F8WGT6;Q02111 [Protein kinase C delta type;Protein kinase C delta ...]	1
P28867;Q1MX41;Q1MX43;Q1MX40;Q1MX42;F8WGT6;Q02111 [Protein kinase C delta type;Protein kinase C delta ...]	2
P29351 [Tyrosine-protein phosphatase non-receptor type 6 ...]	1
P29351 [Tyrosine-protein phosphatase non-receptor type 6 ...]	2
P29595 [NEDD8 ...]	1
P29595 [NEDD8 ...]	2
P29699;A0A338P703;A0A338P7G1;A0A338P7H5;A0A338P692;A0A338P6Y6;CON__P12763 [Alpha-2-HS-glycoprotein ...]	1
P29699;A0A338P703;A0A338P7G1;A0A338P7H5;A0A338P692;A0A338P6Y6;CON__P12763 [Alpha-2-HS-glycoprotein ...]	2
P29788 [Vitronectin ...]	1
P29788 [Vitronectin ...]	2
P30115;Q6P8Q0;P13745;A0A087WQI6;D3Z6A6;D3YZV3;P10648 [Glutathione S-transferase A3;Glutathione S-transfe ...]	1
P30115;Q6P8Q0;P13745;A0A087WQI6;D3Z6A6;D3YZV3;P10648 [Glutathione S-transferase A3;Glutathione S-transfe ...]	2
P30355;A0A0J9YV38;A0A0J9YUC8 [Arachidonate 5-lipoxygenase-activating protein ...]	1
P30355;A0A0J9YV38;A0A0J9YUC8 [Arachidonate 5-lipoxygenase-activating protein ...]	2
P30416 [Peptidyl-prolyl cis-trans isomerase FKBP4;Peptidyl ...]	1
P30416 [Peptidyl-prolyl cis-trans isomerase FKBP4;Peptidyl ...]	2
P30681;A0A1B0GQX9 [High mobility group protein B2 ...]	1
P30681;A0A1B0GQX9 [High mobility group protein B2 ...]	2
P31725 [Protein S100-A9 ...]	1
P31725 [Protein S100-A9 ...]	2
P32020 [Non-specific lipid-transfer protein ...]	1
P32020 [Non-specific lipid-transfer protein ...]	2
P32037 [Solute carrier family 2, facilitated glucose trans ...]	2
P32240 [Prostaglandin E2 receptor EP4 subtype ...]	2
P32261;A0A0A6YWH7;CON__P41361;A0A0A6YXS8;A0A0A6YX49;A0A0A6YX70 [Antithrombin-III ...]	1
P32261;A0A0A6YWH7;CON__P41361;A0A0A6YXS8;A0A0A6YX49;A0A0A6YX70 [Antithrombin-III ...]	2
P32848 [Parvalbumin alpha ...]	1
P32848 [Parvalbumin alpha ...]	2
P33267;A0A0U1RPL9 [Cytochrome P450 2F2 ...]	1
P33267;A0A0U1RPL9 [Cytochrome P450 2F2 ...]	2
P34884 [Macrophage migration inhibitory factor ...]	1
P34928 [Apolipoprotein C-I;Truncated apolipoprotein C-I ...]	1
P34928 [Apolipoprotein C-I;Truncated apolipoprotein C-I ...]	2
P35282;A0A1W2P6Z4 [Ras-related protein Rab-21 ...]	1
P35282;A0A1W2P6Z4 [Ras-related protein Rab-21 ...]	2
P35564 [Calnexin ...]	1
P35564 [Calnexin ...]	2
P35979 [60S ribosomal protein L12 ...]	1
P35979 [60S ribosomal protein L12 ...]	2
P36922 [ ...]	1
P39039;A0A2C9F2B6 [Mannose-binding protein A ...]	1
P39654 [Arachidonate 15-lipoxygenase ...]	1
P39654 [Arachidonate 15-lipoxygenase ...]	2
P40124;B1ARS0;D3YTR7;A0A286YCS6;Q9CYT6 [Adenylyl cyclase-associated protein 1 ...]	1
P40124;B1ARS0;D3YTR7;A0A286YCS6;Q9CYT6 [Adenylyl cyclase-associated protein 1 ...]	2
P40142;A0A286YE28;E0CY51 [Transketolase ...]	1
P40142;A0A286YE28;E0CY51 [Transketolase ...]	2
P41105 [60S ribosomal protein L28 ...]	1
P41105 [60S ribosomal protein L28 ...]	2
P41245 [Matrix metalloproteinase-9 ...]	1
P41245 [Matrix metalloproteinase-9 ...]	2
P42932;H3BL49;H3BJB6;H3BKR8;H3BLL1;H3BKG2 [T-complex protein 1 subunit theta ...]	1
P42932;H3BL49;H3BJB6;H3BKR8;H3BLL1;H3BKG2 [T-complex protein 1 subunit theta ...]	2
P43274 [Histone H1.4 ...]	1
P43274 [Histone H1.4 ...]	2
P43275 [Histone H1.1 ...]	1
P43275 [Histone H1.1 ...]	2
P43276 [Histone H1.5 ...]	1
P43276 [Histone H1.5 ...]	2
P45376;D3YVJ7 [Aldose reductase ...]	1
P45376;D3YVJ7 [Aldose reductase ...]	2
P45377;P21300 [Aldose reductase-related protein 2;Aldose reductas ...]	1
P45377;P21300 [Aldose reductase-related protein 2;Aldose reductas ...]	2
P46412;A0A1C7ZMZ5;A0A1C7ZMZ7 [Glutathione peroxidase 3 ...]	1
P46412;A0A1C7ZMZ5;A0A1C7ZMZ7 [Glutathione peroxidase 3 ...]	2
P46467;Q8VEJ9;Q8BPY9 [Vacuolar protein sorting-associated protein 4B;Vac ...]	1
P46467;Q8VEJ9;Q8BPY9 [Vacuolar protein sorting-associated protein 4B;Vac ...]	2
P47739;B1ATI6 [Aldehyde dehydrogenase, dimeric NADP-preferring ...]	1
P47739;B1ATI6 [Aldehyde dehydrogenase, dimeric NADP-preferring ...]	2
P47791 [Glutathione reductase, mitochondrial ...]	1
P47791 [Glutathione reductase, mitochondrial ...]	2
P47911;A0A0J9YU32 [60S ribosomal protein L6 ...]	1
P47911;A0A0J9YU32 [60S ribosomal protein L6 ...]	2
P47962;D3YYV8 [60S ribosomal protein L5 ...]	1
P47962;D3YYV8 [60S ribosomal protein L5 ...]	2
P47963 [60S ribosomal protein L13 ...]	1
P47963 [60S ribosomal protein L13 ...]	2
P48036;A0A0G2JGQ0 [Annexin A5 ...]	1
P48036;A0A0G2JGQ0 [Annexin A5 ...]	2
P48678;D3YUF7 [Prelamin-A/C;Lamin-A/C ...]	1
P48678;D3YUF7 [Prelamin-A/C;Lamin-A/C ...]	2
P48999;E9QA93;E9Q6H6;A0A0N4SW45 [Arachidonate 5-lipoxygenase ...]	1
P48999;E9QA93;E9Q6H6;A0A0N4SW45 [Arachidonate 5-lipoxygenase ...]	2
P49182 [Heparin cofactor 2 ...]	1
P49182 [Heparin cofactor 2 ...]	2
P49290 [Eosinophil peroxidase;Eosinophil peroxidase light ...]	1
P49290 [Eosinophil peroxidase;Eosinophil peroxidase light ...]	2
P49710;E9Q4E5 [Hematopoietic lineage cell-specific protein ...]	1
P49710;E9Q4E5 [Hematopoietic lineage cell-specific protein ...]	2
P50247;A2ALT5 [Adenosylhomocysteinase ...]	1
P50247;A2ALT5 [Adenosylhomocysteinase ...]	2
P50396;D6RI86 [Rab GDP dissociation inhibitor alpha ...]	1
P50396;D6RI86 [Rab GDP dissociation inhibitor alpha ...]	2
P50516;D3Z1B9;D3YWH3;D3YZ23 [V-type proton ATPase catalytic subunit A ...]	1
P50516;D3Z1B9;D3YWH3;D3YZ23 [V-type proton ATPase catalytic subunit A ...]	2
P50543 [Protein S100-A11 ...]	1
P50543 [Protein S100-A11 ...]	2
P50580 [Proliferation-associated protein 2G4 ...]	1
P50580 [Proliferation-associated protein 2G4 ...]	2
P51150;A0A0N4SVR6;A0A0N4SVG9 [Ras-related protein Rab-7a ...]	1
P51150;A0A0N4SVR6;A0A0N4SVG9 [Ras-related protein Rab-7a ...]	2
P51437 [Cathelin-related antimicrobial peptide ...]	1
P51437 [Cathelin-related antimicrobial peptide ...]	2
P51881;P48962;Q3V132 [ADP/ATP translocase 2;ADP/ATP translocase 2, N-ter ...]	1
P51881;P48962;Q3V132 [ADP/ATP translocase 2;ADP/ATP translocase 2, N-ter ...]	2
P51885;CON__Q05443 [Lumican ...]	1
P51885;CON__Q05443 [Lumican ...]	2
P52480;A0A1L1SU37;A0A1L1SQV8;A0A1L1SUV0;A0A1L1SSN6;A0A1L1STV8;A0A1L1ST52;A0A1L1SVH2;E9Q509;G3X925;P53657 [Pyruvate kinase PKM ...]	1
P52480;A0A1L1SU37;A0A1L1SQV8;A0A1L1SUV0;A0A1L1SSN6;A0A1L1STV8;A0A1L1ST52;A0A1L1SVH2;E9Q509;G3X925;P53657 [Pyruvate kinase PKM ...]	2
P53810;F8WGG5;J3QQ30;J3QPW1 [Phosphatidylinositol transfer protein alpha isofor ...]	1
P53810;F8WGG5;J3QQ30;J3QPW1 [Phosphatidylinositol transfer protein alpha isofor ...]	2
P53994;G3UXQ7;G3V022 [Ras-related protein Rab-2A ...]	1
P53994;G3UXQ7;G3V022 [Ras-related protein Rab-2A ...]	2
P54116 [Erythrocyte band 7 integral membrane protein ...]	1
P54823 [Probable ATP-dependent RNA helicase DDX6 ...]	1
P56480;Q831A5 [ATP synthase subunit beta, mitochondrial ...]	1
P56480;Q831A5 [ATP synthase subunit beta, mitochondrial ...]	2
P57096 [Prostate stem cell antigen ...]	1
P57096 [Prostate stem cell antigen ...]	2
P57787 [Monocarboxylate transporter 4 ...]	2
P58252;G3UXK8;G3UZ34;A2AH85;O08810 [Elongation factor 2 ...]	1
P58252;G3UXK8;G3UZ34;A2AH85;O08810 [Elongation factor 2 ...]	2
P59999;Q3TX55;E9PWA7 [Actin-related protein 2/3 complex subunit 4 ...]	1
P59999;Q3TX55;E9PWA7 [Actin-related protein 2/3 complex subunit 4 ...]	2
P60335 [Poly(rC)-binding protein 1 ...]	1
P60335 [Poly(rC)-binding protein 1 ...]	2
P60766 [Cell division control protein 42 homolog ...]	1
P60766 [Cell division control protein 42 homolog ...]	2
P60843;Q8BTU6;P10630;E9Q561;A0A338P6X5 [Eukaryotic initiation factor 4A-I ...]	1
P60843;Q8BTU6;P10630;E9Q561;A0A338P6X5 [Eukaryotic initiation factor 4A-I ...]	2
P60867 [40S ribosomal protein S20 ...]	1
P60867 [40S ribosomal protein S20 ...]	2
P61027 [Ras-related protein Rab-10 ...]	1
P61027 [Ras-related protein Rab-10 ...]	2
P61161 [Actin-related protein 2 ...]	1
P61161 [Actin-related protein 2 ...]	2
P61358;A2A4Q0 [60S ribosomal protein L27 ...]	1
P61358;A2A4Q0 [60S ribosomal protein L27 ...]	2
P61982 [14-3-3 protein gamma;14-3-3 protein gamma, N-termi ...]	1
P61982 [14-3-3 protein gamma;14-3-3 protein gamma, N-termi ...]	2
P62082 [40S ribosomal protein S7 ...]	1
P62082 [40S ribosomal protein S7 ...]	2
P62137;A0A0J9YUU8;A0A0G2JFF1;P63087;P62141 [Serine/threonine-protein phosphatase PP1-alpha cat ...]	1
P62137;A0A0J9YUU8;A0A0G2JFF1;P63087;P62141 [Serine/threonine-protein phosphatase PP1-alpha cat ...]	2
P62242 [40S ribosomal protein S8 ...]	1
P62242 [40S ribosomal protein S8 ...]	2
P62259;F6WA09;D6REF3 [14-3-3 protein epsilon ...]	1
P62259;F6WA09;D6REF3 [14-3-3 protein epsilon ...]	2
P62264;D3YVF4;D3Z7I1 [40S ribosomal protein S14 ...]	1
P62264;D3YVF4;D3Z7I1 [40S ribosomal protein S14 ...]	2
P62315 [Small nuclear ribonucleoprotein Sm D1 ...]	1
P62315 [Small nuclear ribonucleoprotein Sm D1 ...]	2
P62320 [Small nuclear ribonucleoprotein Sm D3 ...]	1
P62320 [Small nuclear ribonucleoprotein Sm D3 ...]	2
P62627 [Dynein light chain roadblock-type 1 ...]	1
P62702;V9GWY0 [40S ribosomal protein S4, X isoform ...]	1
P62702;V9GWY0 [40S ribosomal protein S4, X isoform ...]	2
P62737;P63268;A0A494B9T3;D3YZY0;D3Z2K3;A0A0U1RQ96 [Actin, aortic smooth muscle;Actin, gamma-enteric s ...]	1
P62737;P63268;A0A494B9T3;D3YZY0;D3Z2K3;A0A0U1RQ96 [Actin, aortic smooth muscle;Actin, gamma-enteric s ...]	2
P62748;A0A1Y7VMK3 [Hippocalcin-like protein 1 ...]	1
P62748;A0A1Y7VMK3 [Hippocalcin-like protein 1 ...]	2
P62751 [60S ribosomal protein L23a ...]	1
P62751 [60S ribosomal protein L23a ...]	2
P62754 [40S ribosomal protein S6 ...]	1
P62754 [40S ribosomal protein S6 ...]	2
P62806 [Histone H4 ...]	1
P62806 [Histone H4 ...]	2
P62814 [V-type proton ATPase subunit B, brain isoform ...]	1
P62814 [V-type proton ATPase subunit B, brain isoform ...]	2
P62827;Q14AA6;Q61820 [GTP-binding nuclear protein Ran ...]	1
P62827;Q14AA6;Q61820 [GTP-binding nuclear protein Ran ...]	2
P62830;A2A6F8 [60S ribosomal protein L23 ...]	1
P62830;A2A6F8 [60S ribosomal protein L23 ...]	2
P62855 [40S ribosomal protein S26 ...]	1
P62855 [40S ribosomal protein S26 ...]	2
P62908;D3YV43;A0A140LI77 [40S ribosomal protein S3 ...]	1
P62908;D3YV43;A0A140LI77 [40S ribosomal protein S3 ...]	2
P62911 [60S ribosomal protein L32 ...]	1
P62918 [60S ribosomal protein L8 ...]	1
P62918 [60S ribosomal protein L8 ...]	2
P62962;Q5SX49;CON__P02584 [Profilin-1;Profilin ...]	1
P62962;Q5SX49;CON__P02584 [Profilin-1;Profilin ...]	2
P63028;D3YU75 [Translationally-controlled tumor protein ...]	1
P63028;D3YU75 [Translationally-controlled tumor protein ...]	2
P63038 [60 kDa heat shock protein, mitochondrial ...]	1
P63038 [60 kDa heat shock protein, mitochondrial ...]	2
P63101;A0A2I3BQ03;D3YXN6;D3YXF4;D3YW45 [14-3-3 protein zeta/delta ...]	1
P63101;A0A2I3BQ03;D3YXN6;D3YXF4;D3YW45 [14-3-3 protein zeta/delta ...]	2
P63260;P60710;E9Q5F4;G3UZ07;E9Q1F2;G3UYG0;E9Q606;A0A1D5RM20;B1ATY1;Q8BFZ3;F8WGM8;E9Q2D1;F6WX90;V9GXQ2 [Actin, cytoplasmic 2;Actin, cytoplasmic 2, N-termi ...]	1
P63260;P60710;E9Q5F4;G3UZ07;E9Q1F2;G3UYG0;E9Q606;A0A1D5RM20;B1ATY1;Q8BFZ3;F8WGM8;E9Q2D1;F6WX90;V9GXQ2 [Actin, cytoplasmic 2;Actin, cytoplasmic 2, N-termi ...]	2
P63325;A0A338P731;Q3UW83;A0A338P7K4;A0A3B2W864 [40S ribosomal protein S10 ...]	1
P63325;A0A338P731;Q3UW83;A0A338P7K4;A0A3B2W864 [40S ribosomal protein S10 ...]	2
P63328 [Serine/threonine-protein phosphatase 2B catalytic ...]	1
P63328 [Serine/threonine-protein phosphatase 2B catalytic ...]	2
P68040 [Guanine nucleotide-binding protein subunit beta-2- ...]	1
P68040 [Guanine nucleotide-binding protein subunit beta-2- ...]	2
P68134;P68033 [Actin, alpha skeletal muscle;Actin, alpha cardiac ...]	1
P68134;P68033 [Actin, alpha skeletal muscle;Actin, alpha cardiac ...]	2
P68254 [14-3-3 protein theta ...]	1
P68254 [14-3-3 protein theta ...]	2
P68369;P05214 [Tubulin alpha-1A chain;Tubulin alpha-3 chain ...]	1
P68369;P05214 [Tubulin alpha-1A chain;Tubulin alpha-3 chain ...]	2
P68373;P05213;A0A2R8VHF3;Q9JJZ2;Q3UX10 [Tubulin alpha-1C chain;Tubulin alpha-1B chain;Tubu ...]	1
P68373;P05213;A0A2R8VHF3;Q9JJZ2;Q3UX10 [Tubulin alpha-1C chain;Tubulin alpha-1B chain;Tubu ...]	2
P68510 [14-3-3 protein eta ...]	1
P68510 [14-3-3 protein eta ...]	2
P70168 [Importin subunit beta-1 ...]	1
P70168 [Importin subunit beta-1 ...]	2
P70441 [Na(+)/H(+) exchange regulatory cofactor NHE-RF1 ...]	1
P70441 [Na(+)/H(+) exchange regulatory cofactor NHE-RF1 ...]	2
P70460 [Vasodilator-stimulated phosphoprotein ...]	1
P70460 [Vasodilator-stimulated phosphoprotein ...]	2
P80313;A0A0N4SV00 [T-complex protein 1 subunit eta ...]	1
P80313;A0A0N4SV00 [T-complex protein 1 subunit eta ...]	2
P80314;A0A1W2P7B7;A0A1W2P828;A0A1W2P871;A0A1W2P6Q3 [T-complex protein 1 subunit beta ...]	1
P80314;A0A1W2P7B7;A0A1W2P828;A0A1W2P871;A0A1W2P6Q3 [T-complex protein 1 subunit beta ...]	2
P80316;E0CZA1 [T-complex protein 1 subunit epsilon ...]	1
P80316;E0CZA1 [T-complex protein 1 subunit epsilon ...]	2
P80318;E9Q133;Q3U0I3;F6Q609 [T-complex protein 1 subunit gamma ...]	1
P80318;E9Q133;Q3U0I3;F6Q609 [T-complex protein 1 subunit gamma ...]	2
P84078;P61205;Q8BSL7;D3YV25;E9Q2C2;A2A6T9 [ADP-ribosylation factor 1;ADP-ribosylation factor ...]	1
P84078;P61205;Q8BSL7;D3YV25;E9Q2C2;A2A6T9 [ADP-ribosylation factor 1;ADP-ribosylation factor ...]	2
P84084 [ADP-ribosylation factor 5 ...]	1
P84084 [ADP-ribosylation factor 5 ...]	2
P84096 [Rho-related GTP-binding protein RhoG ...]	1
P84096 [Rho-related GTP-binding protein RhoG ...]	2
P84104 [Serine/arginine-rich splicing factor 3 ...]	1
P84104 [Serine/arginine-rich splicing factor 3 ...]	2
P97315 [Cysteine and glycine-rich protein 1 ...]	1
P97315 [Cysteine and glycine-rich protein 1 ...]	2
P97351 [40S ribosomal protein S3a ...]	1
P97351 [40S ribosomal protein S3a ...]	2
P97369;A8XU21 [Neutrophil cytosol factor 4 ...]	1
P97369;A8XU21 [Neutrophil cytosol factor 4 ...]	2
P97384;D3Z7U0 [Annexin A11;Annexin ...]	1
P97384;D3Z7U0 [Annexin A11;Annexin ...]	2
P97425 [Eosinophil cationic protein 2 ...]	1
P97425 [Eosinophil cationic protein 2 ...]	2
P97426;O35290 [Eosinophil cationic protein 1;Eosinophil cationic- ...]	1
P97426;O35290 [Eosinophil cationic protein 1;Eosinophil cationic- ...]	2
P97429;F7ANV6;D3Z0S1;A0A0N4SW89;A0A0N4SV57;S4R1F2 [Annexin A4;Annexin ...]	1
P97429;F7ANV6;D3Z0S1;A0A0N4SW89;A0A0N4SV57;S4R1F2 [Annexin A4;Annexin ...]	2
P97797 [Tyrosine-protein phosphatase non-receptor type sub ...]	1
P97797 [Tyrosine-protein phosphatase non-receptor type sub ...]	2
P97872;Q14DT3;Q8C116 [Dimethylaniline monooxygenase [N-oxide-forming] 5 ...]	1
P97872;Q14DT3;Q8C116 [Dimethylaniline monooxygenase [N-oxide-forming] 5 ...]	2
P99024;Q9CWF2;Q7TMM9;P68372;Q9D6F9;Q922F4;Q9ERD7;CON__ENSEMBL:ENSBTAP00000025008;A2AQ07;G3UZR1;A0A1D5RM76 [Tubulin beta-5 chain;Tubulin beta-2B chain;Tubulin ...]	1
P99024;Q9CWF2;Q7TMM9;P68372;Q9D6F9;Q922F4;Q9ERD7;CON__ENSEMBL:ENSBTAP00000025008;A2AQ07;G3UZR1;A0A1D5RM76 [Tubulin beta-5 chain;Tubulin beta-2B chain;Tubulin ...]	2
P99026 [Proteasome subunit beta type-4 ...]	1
P99026 [Proteasome subunit beta type-4 ...]	2
Q00612;A3KG36;Q836V0;G3UWD6;REV__P46662;P97324 [Glucose-6-phosphate 1-dehydrogenase X;Glucose-6-ph ...]	1
Q00612;A3KG36;Q836V0;G3UWD6;REV__P46662;P97324 [Glucose-6-phosphate 1-dehydrogenase X;Glucose-6-ph ...]	2
Q00623;A0A1L1STX7;CON__P15497 [Apolipoprotein A-I;Proapolipoprotein A-I;Truncated ...]	1
Q00623;A0A1L1STX7;CON__P15497 [Apolipoprotein A-I;Proapolipoprotein A-I;Truncated ...]	2
Q00897 [Alpha-1-antitrypsin 1-4 ...]	1
Q00897 [Alpha-1-antitrypsin 1-4 ...]	2
Q00898 [Alpha-1-antitrypsin 1-5 ...]	1
Q00898 [Alpha-1-antitrypsin 1-5 ...]	2
Q01339;I7HJR3;CON__P17690 [Beta-2-glycoprotein 1 ...]	1
Q01339;I7HJR3;CON__P17690 [Beta-2-glycoprotein 1 ...]	2
Q01853 [Transitional endoplasmic reticulum ATPase ...]	1
Q01853 [Transitional endoplasmic reticulum ATPase ...]	2
Q02013 [Aquaporin-1 ...]	2
Q02053;P31254 [Ubiquitin-like modifier-activating enzyme 1 ...]	1
Q02053;P31254 [Ubiquitin-like modifier-activating enzyme 1 ...]	2
Q02257 [Junction plakoglobin ...]	1
Q02257 [Junction plakoglobin ...]	2
Q03734;P29621 [Serine protease inhibitor A3M ...]	1
Q03734;P29621 [Serine protease inhibitor A3M ...]	2
Q04447 [Creatine kinase B-type ...]	2
Q05144;A0A2R8VHH0 [Ras-related C3 botulinum toxin substrate 2 ...]	1
Q05144;A0A2R8VHH0 [Ras-related C3 botulinum toxin substrate 2 ...]	2
Q05816 [Fatty acid-binding protein, epidermal ...]	1
Q05816 [Fatty acid-binding protein, epidermal ...]	2
Q06770 [Corticosteroid-binding globulin ...]	1
Q06770 [Corticosteroid-binding globulin ...]	2
Q06890;E9PUU2;E9PXG5;E9Q8Y5;E9Q9B8;E9Q2G2 [Clusterin;Clusterin beta chain;Clusterin alpha cha ...]	1
Q06890;E9PUU2;E9PXG5;E9Q8Y5;E9Q9B8;E9Q2G2 [Clusterin;Clusterin beta chain;Clusterin alpha cha ...]	2
Q07456 [Protein AMBP;Alpha-1-microglobulin;Inter-alpha-try ...]	1
Q07456 [Protein AMBP;Alpha-1-microglobulin;Inter-alpha-try ...]	2
Q08093;D3Z7R6;A0A0G2JDV8;Q9DAW9 [Calponin-2 ...]	1
Q08093;D3Z7R6;A0A0G2JDV8;Q9DAW9 [Calponin-2 ...]	2
Q19LI2 [Alpha-1B-glycoprotein ...]	1
Q19LI2 [Alpha-1B-glycoprotein ...]	2
Q3KQQ2;P04939;Q80YX8;P11590 [Major urinary protein 3 ...]	1
Q3KQQ2;P04939;Q80YX8;P11590 [Major urinary protein 3 ...]	2
Q3SXK0;P38575 [Uroplakin-2 ...]	1
Q3SXK0;P38575 [Uroplakin-2 ...]	2
Q3TF41;Q8BSH9;P28656 [Nucleosome assembly protein 1-like 1 ...]	1
Q3THE2;Q6ZWQ9;Q9CQ19 [Myosin regulatory light chain 12B;Myosin regulator ...]	1
Q3THE2;Q6ZWQ9;Q9CQ19 [Myosin regulatory light chain 12B;Myosin regulator ...]	2
Q3THW5;P0C0S6;Q8R029;Q3UA95 [Histone H2A.V;Histone H2A.Z;Histone H2A ...]	1
Q3THW5;P0C0S6;Q8R029;Q3UA95 [Histone H2A.V;Histone H2A.Z;Histone H2A ...]	2
Q3TLP8;P63001;P60764;A2AC13;A0A2R8VH29;A0A1B0GSL4;G3UZM2;D3Z3L1;F2Z463;D3YX61;Q8R527;Q9ER71 [Ras-related C3 botulinum toxin substrate 1;Ras-rel ...]	1
Q3TLP8;P63001;P60764;A2AC13;A0A2R8VH29;A0A1B0GSL4;G3UZM2;D3Z3L1;F2Z463;D3YX61;Q8R527;Q9ER71 [Ras-related C3 botulinum toxin substrate 1;Ras-rel ...]	2
Q3TML0;Q922R8 [Protein disulfide-isomerase A6 ...]	1
Q3TML0;Q922R8 [Protein disulfide-isomerase A6 ...]	2
Q3TN85;Q8CAP3;P54726;P54728 [UV excision repair protein RAD23 homolog A;UV exci ...]	1
Q3TN85;Q8CAP3;P54726;P54728 [UV excision repair protein RAD23 homolog A;UV exci ...]	2
Q3TRH2;Q9D8W5 [26S proteasome non-ATPase regulatory subunit 12 ...]	2
Q3TYL7;Q9QYJ3 [DnaJ homolog subfamily B member 1 ...]	1
Q3TYL7;Q9QYJ3 [DnaJ homolog subfamily B member 1 ...]	2
Q3U2G2;Q61316 [Heat shock 70 kDa protein 4 ...]	1
Q3U2S8 [Voltage-gated hydrogen channel 1 ...]	1
Q3U2S8 [Voltage-gated hydrogen channel 1 ...]	2
Q3U367;Q9JLJ2 [4-trimethylaminobutyraldehyde dehydrogenase ...]	1
Q3U367;Q9JLJ2 [4-trimethylaminobutyraldehyde dehydrogenase ...]	2
Q3U3V1;O88947 [Coagulation factor X;Factor X light chain;Factor X ...]	1
Q3U3V1;O88947 [Coagulation factor X;Factor X light chain;Factor X ...]	2
Q3U4W8;P56399 [Ubiquitin carboxyl-terminal hydrolase;Ubiquitin ca ...]	2
Q3U5Q7 [UMP-CMP kinase 2, mitochondrial ...]	1
Q3U5Q7 [UMP-CMP kinase 2, mitochondrial ...]	2
Q3U9G9;A0A0A6YWS3;A0A0A6YXW3;A0A0A6YXT6;A0A0A6YW01;A0A0A6YY12 [Lamin-B receptor ...]	1
Q3U9G9;A0A0A6YWS3;A0A0A6YXW3;A0A0A6YXT6;A0A0A6YW01;A0A0A6YY12 [Lamin-B receptor ...]	2
Q3UA72;Q9CPW4 [Actin-related protein 2/3 complex subunit 5 ...]	1
Q3UA72;Q9CPW4 [Actin-related protein 2/3 complex subunit 5 ...]	2
Q3UDR8 [Protein YIPF3;Protein YIPF3, N-terminally processe ...]	1
Q3UDR8 [Protein YIPF3;Protein YIPF3, N-terminally processe ...]	2
Q3UDS7;A0A1L1SSF2;Q8VDL4 [ADP-dependent glucokinase ...]	1
Q3UDS7;A0A1L1SSF2;Q8VDL4 [ADP-dependent glucokinase ...]	2
Q3UER8;Q8VCM7 [Fibrinogen gamma chain ...]	1
Q3UER8;Q8VCM7 [Fibrinogen gamma chain ...]	2
Q3UP87 [Neutrophil elastase ...]	1
Q3UP87 [Neutrophil elastase ...]	2
Q3UV17;CON__Q7RTS7;CON__Q32MB2 [Keratin, type II cytoskeletal 2 oral ...]	1
Q3UV17;CON__Q7RTS7;CON__Q32MB2 [Keratin, type II cytoskeletal 2 oral ...]	2
Q3UVF6 [ ...]	2
Q3UVK0;G8JL46;F6TQS9 [Endoplasmic reticulum metallopeptidase 1 ...]	1
Q3UVK0;G8JL46;F6TQS9 [Endoplasmic reticulum metallopeptidase 1 ...]	2
Q3UWM4 [Lysine-specific demethylase 7A ...]	2
Q3V0M1;B7ZWJ3 [ ...]	2
Q3V3R8;A0A0J9YUI1;A0A0J9YU07;P61087 [Ubiquitin-conjugating enzyme E2 K ...]	1
Q3V3R8;A0A0J9YUI1;A0A0J9YU07;P61087 [Ubiquitin-conjugating enzyme E2 K ...]	2
Q4U4S6 [Xin actin-binding repeat-containing protein 2 ...]	1
Q4U4S6 [Xin actin-binding repeat-containing protein 2 ...]	2
Q504P4;P63017;D3Z5E2 [Heat shock cognate 71 kDa protein ...]	1
Q504P4;P63017;D3Z5E2 [Heat shock cognate 71 kDa protein ...]	2
Q50HX3;Q91V41;A0A2R8VHW9 [Ras-related protein Rab-14 ...]	1
Q542I8;P11835;M0QWA7;D3YYP8;D3Z1S4 [Integrin beta;Integrin beta-2 ...]	1
Q542I8;P11835;M0QWA7;D3YYP8;D3Z1S4 [Integrin beta;Integrin beta-2 ...]	2
Q543K9;P23492;A0A2I3BQH2;A0A2I3BS22;Q9D8C9 [Purine nucleoside phosphorylase ...]	1
Q543K9;P23492;A0A2I3BQH2;A0A2I3BS22;Q9D8C9 [Purine nucleoside phosphorylase ...]	2
Q5DTT4 [Retrotransposon gag domain-containing protein 4 ...]	2
Q5EBP8;P49312 [Heterogeneous nuclear ribonucleoprotein A1;Heterog ...]	1
Q5EBP8;P49312 [Heterogeneous nuclear ribonucleoprotein A1;Heterog ...]	2
Q5FW60 [Major urinary protein 20 ...]	1
Q5FW60 [Major urinary protein 20 ...]	2
Q5ND35;Q61247;E9PXE0 [Alpha-2-antiplasmin ...]	1
Q5ND35;Q61247;E9PXE0 [Alpha-2-antiplasmin ...]	2
Q5RKN9;P47753;A0A0G2JE27 [F-actin-capping protein subunit alpha-1 ...]	1
Q5RKN9;P47753;A0A0G2JE27 [F-actin-capping protein subunit alpha-1 ...]	2
Q5SQG5;P67778 [Prohibitin ...]	1
Q5SQG5;P67778 [Prohibitin ...]	2
Q5SS83;Q60634 [Flotillin-2 ...]	2
Q5SUA5 [Unconventional myosin-Ig ...]	1
Q5SUA5 [Unconventional myosin-Ig ...]	2
Q5SVG5;Q5SVG4;O35643;H3BKM0;H3BIY9;Q9DBG3 [AP-1 complex subunit beta-1;AP complex subunit bet ...]	1
Q5SVG5;Q5SVG4;O35643;H3BKM0;H3BIY9;Q9DBG3 [AP-1 complex subunit beta-1;AP complex subunit bet ...]	2
Q5SW88;P62821;Q5SW87;A0A494BA38;A0A494BBL7;A0A494B945;Q9D1G1;Q5SW86 [Ras-related protein Rab-1A;Ras-related protein Rab ...]	1
Q5SW88;P62821;Q5SW87;A0A494BA38;A0A494BBL7;A0A494B945;Q9D1G1;Q5SW86 [Ras-related protein Rab-1A;Ras-related protein Rab ...]	2
Q5SXR6;Q68FD5;F6Z1R4 [Clathrin heavy chain;Clathrin heavy chain 1 ...]	1
Q5SXR6;Q68FD5;F6Z1R4 [Clathrin heavy chain;Clathrin heavy chain 1 ...]	2
Q5XJY5 [Coatomer subunit delta ...]	1
Q5XJY5 [Coatomer subunit delta ...]	2
Q60590 [Alpha-1-acid glycoprotein 1 ...]	1
Q60590 [Alpha-1-acid glycoprotein 1 ...]	2
Q60648 [Ganglioside GM2 activator ...]	1
Q60692 [Proteasome subunit beta type-6 ...]	1
Q60692 [Proteasome subunit beta type-6 ...]	2
Q60817;P70670 [Nascent polypeptide-associated complex subunit alp ...]	1
Q60817;P70670 [Nascent polypeptide-associated complex subunit alp ...]	2
Q60864 [Stress-induced-phosphoprotein 1 ...]	1
Q60864 [Stress-induced-phosphoprotein 1 ...]	2
Q60932 [Voltage-dependent anion-selective channel protein ...]	1
Q60932 [Voltage-dependent anion-selective channel protein ...]	2
Q61029;Q61033 [Lamina-associated polypeptide 2, isoforms beta/del ...]	1
Q61029;Q61033 [Lamina-associated polypeptide 2, isoforms beta/del ...]	2
Q61093;E9Q7S3;E9Q802 [Cytochrome b-245 heavy chain ...]	1
Q61093;E9Q7S3;E9Q802 [Cytochrome b-245 heavy chain ...]	2
Q61102 [ATP-binding cassette sub-family B member 7, mitoch ...]	1
Q61102 [ATP-binding cassette sub-family B member 7, mitoch ...]	2
Q61129;A0A0G2JF07 [Complement factor I;Complement factor I heavy chai ...]	1
Q61129;A0A0G2JF07 [Complement factor I;Complement factor I heavy chai ...]	2
Q61171;D3Z4A4 [Peroxiredoxin-2 ...]	1
Q61171;D3Z4A4 [Peroxiredoxin-2 ...]	2
Q61176 [Arginase-1 ...]	1
Q61176 [Arginase-1 ...]	2
Q61233;A0A1C7CYV0;B1AX58;Q99K51;D3YZ25;D3YVW8;D3Z7D9;D3Z311;Q3V0K9 [Plastin-2 ...]	1
Q61233;A0A1C7CYV0;B1AX58;Q99K51;D3YZ25;D3YVW8;D3Z7D9;D3Z311;Q3V0K9 [Plastin-2 ...]	2
Q61335 [B-cell receptor-associated protein 31 ...]	1
Q61335 [B-cell receptor-associated protein 31 ...]	2
Q61362;D3Z2Z5;D3YXU4 [Chitinase-3-like protein 1 ...]	1
Q61362;D3Z2Z5;D3YXU4 [Chitinase-3-like protein 1 ...]	2
Q61578 [NADPH:adrenodoxin oxidoreductase, mitochondrial ...]	1
Q61598;A0A1Y7VL99;A0A1Y7VLG4 [Rab GDP dissociation inhibitor beta ...]	1
Q61598;A0A1Y7VL99;A0A1Y7VLG4 [Rab GDP dissociation inhibitor beta ...]	2
Q61599;D3YWL7;A0A0N4SVH4 [Rho GDP-dissociation inhibitor 2 ...]	1
Q61599;D3YWL7;A0A0N4SVH4 [Rho GDP-dissociation inhibitor 2 ...]	2
Q61646 [Haptoglobin;Haptoglobin alpha chain;Haptoglobin be ...]	1
Q61646 [Haptoglobin;Haptoglobin alpha chain;Haptoglobin be ...]	2
Q61696;P17879 [Heat shock 70 kDa protein 1A;Heat shock 70 kDa pro ...]	1
Q61696;P17879 [Heat shock 70 kDa protein 1A;Heat shock 70 kDa pro ...]	2
Q61792;A2A6G9;A2A6H0;A2A6G7;A2A6G8;A2A6G0;A2A6G6 [LIM and SH3 domain protein 1 ...]	1
Q61792;A2A6G9;A2A6H0;A2A6G7;A2A6G8;A2A6G0;A2A6G6 [LIM and SH3 domain protein 1 ...]	2
Q61838;D3YUI3;Q6GQT1 [Alpha-2-macroglobulin;Alpha-2-macroglobulin 165 kD ...]	1
Q61838;D3YUI3;Q6GQT1 [Alpha-2-macroglobulin;Alpha-2-macroglobulin 165 kD ...]	2
Q61878 [Bone marrow proteoglycan;Eosinophil granule major ...]	1
Q61878 [Bone marrow proteoglycan;Eosinophil granule major ...]	2
Q62093 [Serine/arginine-rich splicing factor 2 ...]	1
Q62093 [Serine/arginine-rich splicing factor 2 ...]	2
Q62095;P16381;Q62167 [ATP-dependent RNA helicase DDX3Y;Putative ATP-depe ...]	1
Q62095;P16381;Q62167 [ATP-dependent RNA helicase DDX3Y;Putative ATP-depe ...]	2
Q62266;Q62267 [Cornifin-A ...]	1
Q62266;Q62267 [Cornifin-A ...]	2
Q62465 [Synaptic vesicle membrane protein VAT-1 homolog ...]	1
Q62465 [Synaptic vesicle membrane protein VAT-1 homolog ...]	2
Q64339 [Ubiquitin-like protein ISG15 ...]	1
Q64339 [Ubiquitin-like protein ISG15 ...]	2
Q64726 [Zinc-alpha-2-glycoprotein ...]	1
Q64726 [Zinc-alpha-2-glycoprotein ...]	2
Q64727 [Vinculin ...]	1
Q64727 [Vinculin ...]	2
Q66JV4;Q80YR9 [RNA-binding protein 12B-B;RNA-binding protein 12B- ...]	1
Q6A0A2 [La-related protein 4B ...]	1
Q6A0A2 [La-related protein 4B ...]	2
Q6BCL1 [PML-RARA-regulated adapter molecule 1 ...]	1
Q6BCL1 [PML-RARA-regulated adapter molecule 1 ...]	2
Q6GT24;D3Z0Y2;O08709;Q8BG37 [Peroxiredoxin-6 ...]	1
Q6GT24;D3Z0Y2;O08709;Q8BG37 [Peroxiredoxin-6 ...]	2
Q6P069 [Sorcin ...]	1
Q6P069 [Sorcin ...]	2
Q6P9P0 [Protein FAM178A ...]	1
Q6PCS8 [ ...]	1
Q6QI06 [Rapamycin-insensitive companion of mTOR ...]	1
Q6S9I0;Q6S9I2;Q6S9I3;A0A338P699;A0A338P7D0;E0CYI5;CON__P01045-1;CON__Q2KJ62;CON__P01044-1 [ ...]	1
Q6S9I0;Q6S9I2;Q6S9I3;A0A338P699;A0A338P7D0;E0CYI5;CON__P01045-1;CON__Q2KJ62;CON__P01044-1 [ ...]	2
Q6ZQ38 [Cullin-associated NEDD8-dissociated protein 1 ...]	1
Q6ZQ38 [Cullin-associated NEDD8-dissociated protein 1 ...]	2
Q6ZQM8 [UDP-glucuronosyltransferase 1-7C ...]	1
Q6ZQM8 [UDP-glucuronosyltransferase 1-7C ...]	2
Q6ZWN5;F7CJS8;D3YWH9;Q9CXW7 [40S ribosomal protein S9 ...]	1
Q6ZWN5;F7CJS8;D3YWH9;Q9CXW7 [40S ribosomal protein S9 ...]	2
Q6ZWV7 [60S ribosomal protein L35 ...]	1
Q6ZWV7 [60S ribosomal protein L35 ...]	2
Q6ZWZ7;Q9CPR4;B2RY53 [60S ribosomal protein L17 ...]	1
Q6ZWZ7;Q9CPR4;B2RY53 [60S ribosomal protein L17 ...]	2
Q76MZ3;G3UWL2 [Serine/threonine-protein phosphatase 2A 65 kDa reg ...]	1
Q76MZ3;G3UWL2 [Serine/threonine-protein phosphatase 2A 65 kDa reg ...]	2
Q78PG9 [Coiled-coil domain-containing protein 25 ...]	2
Q78PY7;Q3TJ56 [Staphylococcal nuclease domain-containing protein ...]	2
Q7TSV4;A0A0G2JG04 [Phosphoglucomutase-2 ...]	1
Q7TSV4;A0A0G2JG04 [Phosphoglucomutase-2 ...]	2
Q80UP5;F7B209;Q6PD24 [Ankyrin repeat domain-containing protein 13A;Ankyr ...]	1
Q80VQ0 [Aldehyde dehydrogenase family 3 member B1 ...]	1
Q80W54 [CAAX prenyl protease 1 homolog ...]	1
Q80W54 [CAAX prenyl protease 1 homolog ...]	2
Q80X90 [Filamin-B ...]	1
Q80X90 [Filamin-B ...]	2
Q80YQ1;P35441;CON__Q28194 [Thrombospondin-1 ...]	1
Q80YQ1;P35441;CON__Q28194 [Thrombospondin-1 ...]	2
Q80ZS7;Q9D0M5;P63168 [Dynein light chain 2, cytoplasmic;Dynein light cha ...]	1
Q80ZS7;Q9D0M5;P63168 [Dynein light chain 2, cytoplasmic;Dynein light cha ...]	2
Q82YQ4;O32795 [ ...]	2
Q82YV4 [ ...]	1
Q82YW3 [ ...]	2
Q82YW5 [ ...]	1
Q82YW5 [ ...]	2
Q82Z41 [ ...]	1
Q82Z45 [ ...]	2
Q82Z47 [ ...]	1
Q830Q5 [ ...]	1
Q830Q5 [ ...]	2
Q830Q6 [ ...]	1
Q830Q6 [ ...]	2
Q830Q8 [ ...]	1
Q830Q8 [ ...]	2
Q833I8;Q834V5 [ ...]	1
Q833I8;Q834V5 [ ...]	2
Q833I9 [ ...]	1
Q833I9 [ ...]	2
Q834N1 [ ...]	1
Q834N1 [ ...]	2
Q834T3 [ ...]	1
Q834T3 [ ...]	2
Q834T5 [ ...]	1
Q834T5 [ ...]	2
Q835C1 [ ...]	2
Q835J8 [ ...]	1
Q835J8 [ ...]	2
Q835M1 [ ...]	1
Q835M1 [ ...]	2
Q835M2 [ ...]	1
Q835M2 [ ...]	2
Q835M3 [ ...]	1
Q835M3 [ ...]	2
Q835M4 [ ...]	1
Q835M4 [ ...]	2
Q835R7 [ ...]	1
Q835R7 [ ...]	2
Q835W5 [ ...]	2
Q836D5 [ ...]	1
Q837F9 [ ...]	2
Q838M6 [ ...]	1
Q839D2 [ ...]	1
Q839E1 [ ...]	1
Q839E8 [ ...]	1
Q839E8 [ ...]	2
Q839E9 [ ...]	1
Q839F3 [ ...]	1
Q839F3 [ ...]	2
Q839F8 [ ...]	1
Q839F8 [ ...]	2
Q839G1 [ ...]	1
Q839G1 [ ...]	2
Q839G5 [ ...]	1
Q839G5 [ ...]	2
Q839G8 [ ...]	1
Q839G8 [ ...]	2
Q8BFR5;A0A0U1RNQ6 [Elongation factor Tu, mitochondrial ...]	1
Q8BFR5;A0A0U1RNQ6 [Elongation factor Tu, mitochondrial ...]	2
Q8BG13;O89086 [RNA-binding protein 3 ...]	1
Q8BGQ7 [Alanine--tRNA ligase, cytoplasmic ...]	1
Q8BGQ7 [Alanine--tRNA ligase, cytoplasmic ...]	2
Q8BGX0 [E3 ubiquitin-protein ligase TRIM23 ...]	1
Q8BGX0 [E3 ubiquitin-protein ligase TRIM23 ...]	2
Q8BH61 [Coagulation factor XIII A chain ...]	1
Q8BH61 [Coagulation factor XIII A chain ...]	2
Q8BHJ8 [ ...]	1
Q8BHN3 [Neutral alpha-glucosidase AB ...]	1
Q8BHN3 [Neutral alpha-glucosidase AB ...]	2
Q8BJS4 [SUN domain-containing protein 2 ...]	1
Q8BJS4 [SUN domain-containing protein 2 ...]	2
Q8BJY1 [26S proteasome non-ATPase regulatory subunit 5 ...]	1
Q8BJY1 [26S proteasome non-ATPase regulatory subunit 5 ...]	2
Q8BMS1 [Trifunctional enzyme subunit alpha, mitochondrial; ...]	1
Q8BMS1 [Trifunctional enzyme subunit alpha, mitochondrial; ...]	2
Q8BND5 [Sulfhydryl oxidase 1 ...]	1
Q8BND5 [Sulfhydryl oxidase 1 ...]	2
Q8BP67 [60S ribosomal protein L24 ...]	1
Q8BP67 [60S ribosomal protein L24 ...]	2
Q8BPU7 [Engulfment and cell motility protein 1 ...]	1
Q8BPU7 [Engulfment and cell motility protein 1 ...]	2
Q8BSF5 [Kelch-like protein 38 ...]	1
Q8BT60;Q9D6C8;A0A0R4J0J1;Q3UYN2;Q1RLL3;Q9Z140;Q8BLR2;Q0VE82;Q9DC53;Q8JZW4 [Copine-3 ...]	1
Q8BT60;Q9D6C8;A0A0R4J0J1;Q3UYN2;Q1RLL3;Q9Z140;Q8BLR2;Q0VE82;Q9DC53;Q8JZW4 [Copine-3 ...]	2
Q8BWT1;A0A494B9J2 [3-ketoacyl-CoA thiolase, mitochondrial ...]	1
Q8C253;P16110 [Galectin;Galectin-3 ...]	1
Q8C253;P16110 [Galectin;Galectin-3 ...]	2
Q8C266;Q9CQD1;P61021;P35278;A2A5F6;A2A5F5 [Ras-related protein Rab-5A;Ras-related protein Rab ...]	1
Q8C266;Q9CQD1;P61021;P35278;A2A5F6;A2A5F5 [Ras-related protein Rab-5A;Ras-related protein Rab ...]	2
Q8C2Q7;P70333;O35737 [Heterogeneous nuclear ribonucleoprotein H2;Heterog ...]	1
Q8C2Q7;P70333;O35737 [Heterogeneous nuclear ribonucleoprotein H2;Heterog ...]	2
Q8C845;Q9D8Y0 [EF-hand domain-containing protein D2 ...]	1
Q8C845;Q9D8Y0 [EF-hand domain-containing protein D2 ...]	2
Q8CAG6;Q9JHK5 [Pleckstrin ...]	1
Q8CAG6;Q9JHK5 [Pleckstrin ...]	2
Q8CB12;Q3TR54;Q2KHK6 [Gasdermin-C3;Gasdermin-C4;Gasdermin-C2 ...]	1
Q8CB12;Q3TR54;Q2KHK6 [Gasdermin-C3;Gasdermin-C4;Gasdermin-C2 ...]	2
Q8CB58;Q8BGJ5;Q922I7;F7C521;F7DCW4;E9QMW9;G8JL74;G3UXA6;Q8BHD7;P17225 [Polypyrimidine tract-binding protein 3;Polypyrimid ...]	1
Q8CB58;Q8BGJ5;Q922I7;F7C521;F7DCW4;E9QMW9;G8JL74;G3UXA6;Q8BHD7;P17225 [Polypyrimidine tract-binding protein 3;Polypyrimid ...]	2
Q8CBB6;Q8CGP2;Q8CGP1;Q6ZWY9;Q64525;Q64478;Q64475;P10854;P10853;P70696;Q9D2U9;Q8CGP0;Q64524 [Histone H2B;Histone H2B type 1-P;Histone H2B type ...]	1
Q8CBB6;Q8CGP2;Q8CGP1;Q6ZWY9;Q64525;Q64478;Q64475;P10854;P10853;P70696;Q9D2U9;Q8CGP0;Q64524 [Histone H2B;Histone H2B type 1-P;Histone H2B type ...]	2
Q8CBG6;Q9CQ60;D3Z4X1;F6X8L5 [6-phosphogluconolactonase ...]	1
Q8CBG6;Q9CQ60;D3Z4X1;F6X8L5 [6-phosphogluconolactonase ...]	2
Q8CF02 [Protein FAM25C ...]	1
Q8CG29;P70248;G3V011 [Unconventional myosin-If ...]	1
Q8CG29;P70248;G3V011 [Unconventional myosin-If ...]	2
Q8CHP8 [Phosphoglycolate phosphatase ...]	1
Q8CHP8 [Phosphoglycolate phosphatase ...]	2
Q8CHW4 [Translation initiation factor eIF-2B subunit epsil ...]	1
Q8CI94 [Glycogen phosphorylase, brain form ...]	1
Q8CI94 [Glycogen phosphorylase, brain form ...]	2
Q8CIH5 [1-phosphatidylinositol 4,5-bisphosphate phosphodie ...]	1
Q8CIH5 [1-phosphatidylinositol 4,5-bisphosphate phosphodie ...]	2
Q8CIN4 [Serine/threonine-protein kinase PAK 2;PAK-2p27;PAK ...]	1
Q8CIN4 [Serine/threonine-protein kinase PAK 2;PAK-2p27;PAK ...]	2
Q8K0E8 [Fibrinogen beta chain;Fibrinopeptide B;Fibrinogen ...]	1
Q8K0E8 [Fibrinogen beta chain;Fibrinopeptide B;Fibrinogen ...]	2
Q8K1H9 [Odorant-binding protein 2a ...]	1
Q8K1H9 [Odorant-binding protein 2a ...]	2
Q8K1K2;P62196 [26S protease regulatory subunit 8 ...]	2
Q8K2B3 [Succinate dehydrogenase [ubiquinone] flavoprotein ...]	1
Q8K2B3 [Succinate dehydrogenase [ubiquinone] flavoprotein ...]	2
Q8K469;P11928 [2-5-oligoadenylate synthase 1A ...]	2
Q8QZY1 [Eukaryotic translation initiation factor 3 subunit ...]	1
Q8QZY1 [Eukaryotic translation initiation factor 3 subunit ...]	2
Q8R050;F7CE88;Q149F3 [Eukaryotic peptide chain release factor GTP-bindin ...]	1
Q8R050;F7CE88;Q149F3 [Eukaryotic peptide chain release factor GTP-bindin ...]	2
Q8R080 [G2 and S phase-expressed protein 1 ...]	1
Q8R0X7;D6REF7 [Sphingosine-1-phosphate lyase 1 ...]	1
Q8R0X7;D6REF7 [Sphingosine-1-phosphate lyase 1 ...]	2
Q8R121 [Protein Z-dependent protease inhibitor ...]	1
Q8R2S8 [CD177 antigen ...]	1
Q8R2S8 [CD177 antigen ...]	2
Q8R4U6 [DNA topoisomerase I, mitochondrial ...]	2
Q8R5J9 [PRA1 family protein 3 ...]	1
Q8VBT6 [Apolipoprotein B receptor ...]	1
Q8VCU2;O70362 [Phosphatidylinositol-glycan-specific phospholipase ...]	1
Q8VCU2;O70362 [Phosphatidylinositol-glycan-specific phospholipase ...]	2
Q8VDD5;Q5SV64;Q3UH59;Q61879;A0A2R8VKI5;Q8BXF2;A0A140LI60;E9Q264;A2AQP0 [Myosin-9 ...]	1
Q8VDD5;Q5SV64;Q3UH59;Q61879;A0A2R8VKI5;Q8BXF2;A0A140LI60;E9Q264;A2AQP0 [Myosin-9 ...]	2
Q8VDM4 [26S proteasome non-ATPase regulatory subunit 2 ...]	1
Q8VDM4 [26S proteasome non-ATPase regulatory subunit 2 ...]	2
Q8VDN2;D3YYN7;A0A0G2JGX4;Q8VCE0;Q6PIC6;Q6PIE5;Q9WV27;Q9Z1W8 [Sodium/potassium-transporting ATPase subunit alpha ...]	1
Q8VDN2;D3YYN7;A0A0G2JGX4;Q8VCE0;Q6PIC6;Q6PIE5;Q9WV27;Q9Z1W8 [Sodium/potassium-transporting ATPase subunit alpha ...]	2
Q8VDU4;E9PXI0;P27870;Q9R0C8 [Proto-oncogene vav;Guanine nucleotide exchange fac ...]	1
Q8VDU4;E9PXI0;P27870;Q9R0C8 [Proto-oncogene vav;Guanine nucleotide exchange fac ...]	2
Q8VEK3 [Heterogeneous nuclear ribonucleoprotein U ...]	1
Q8VEK3 [Heterogeneous nuclear ribonucleoprotein U ...]	2
Q91V55;D3YYM6;D3Z1S8;P97461 [40S ribosomal protein S5;40S ribosomal protein S5, ...]	1
Q91V55;D3YYM6;D3Z1S8;P97461 [40S ribosomal protein S5;40S ribosomal protein S5, ...]	2
Q91VB8;P01942 [Hemoglobin subunit alpha ...]	1
Q91VB8;P01942 [Hemoglobin subunit alpha ...]	2
Q91X17;A0A140LI10 [Uromodulin;Uromodulin, secreted form ...]	1
Q91X17;A0A140LI10 [Uromodulin;Uromodulin, secreted form ...]	2
Q91X72;A0A1B0GS57 [Hemopexin ...]	1
Q91X72;A0A1B0GS57 [Hemopexin ...]	2
Q91XL1 [ ...]	1
Q91XL1 [ ...]	2
Q91XQ0 [Dynein heavy chain 8, axonemal ...]	1
Q91YQ5;A0A0N4SUJ8 [Dolichyl-diphosphooligosaccharide--protein glycosy ...]	1
Q91YQ5;A0A0N4SUJ8 [Dolichyl-diphosphooligosaccharide--protein glycosy ...]	2
Q91YR9;REV__Q3TVC7;REV__A0A0R4J177 [Prostaglandin reductase 1 ...]	1
Q91YR9;REV__Q3TVC7;REV__A0A0R4J177 [Prostaglandin reductase 1 ...]	2
Q91Z25;Q9WV32;F6VVE6;D3Z6S0;F6THG2 [Actin-related protein 2/3 complex subunit 1B ...]	1
Q91Z25;Q9WV32;F6VVE6;D3Z6S0;F6THG2 [Actin-related protein 2/3 complex subunit 1B ...]	2
Q91Z98 [Chitinase-like protein 4 ...]	1
Q91Z98 [Chitinase-like protein 4 ...]	2
Q921I1;D3YYR8;F7BAE9;E9Q2Q7;F7CJN9;E9Q939;CON__Q29443;CON__Q0IIK2;CON__Q2HJF0 [Serotransferrin ...]	1
Q921I1;D3YYR8;F7BAE9;E9Q2Q7;F7CJN9;E9Q939;CON__Q29443;CON__Q0IIK2;CON__Q2HJF0 [Serotransferrin ...]	2
Q921L6;Q60598 [Src substrate cortactin ...]	1
Q921L6;Q60598 [Src substrate cortactin ...]	2
Q921R2;P62301;A0A0U1RQ71 [40S ribosomal protein S13 ...]	1
Q921R2;P62301;A0A0U1RQ71 [40S ribosomal protein S13 ...]	2
Q922B2 [Aspartate--tRNA ligase, cytoplasmic ...]	1
Q922B2 [Aspartate--tRNA ligase, cytoplasmic ...]	2
Q922Q8 [Leucine-rich repeat-containing protein 59 ...]	1
Q924B0;O55023;Q80ZJ2 [Inositol monophosphatase 1 ...]	1
Q924B0;O55023;Q80ZJ2 [Inositol monophosphatase 1 ...]	2
Q93EU6 [ ...]	1
Q93EU6 [ ...]	2
Q99JI6;A0A0G2JDL9;P62835;A0A0G2JE52;A0A0G2JED9;A0A1W2P777 [Ras-related protein Rap-1b;Ras-related protein Rap ...]	1
Q99JI6;A0A0G2JDL9;P62835;A0A0G2JE52;A0A0G2JED9;A0A1W2P777 [Ras-related protein Rap-1b;Ras-related protein Rap ...]	2
Q99JY0;D3YXU1 [Trifunctional enzyme subunit beta, mitochondrial;3 ...]	1
Q99JY0;D3YXU1 [Trifunctional enzyme subunit beta, mitochondrial;3 ...]	2
Q99JY9;A0A087WS98;A0A087WP86;A0A087WQ14;A0A087WRA1;Q641P0;A0A087WQ83 [Actin-related protein 3 ...]	1
Q99JY9;A0A087WS98;A0A087WP86;A0A087WQ14;A0A087WRA1;Q641P0;A0A087WQ83 [Actin-related protein 3 ...]	2
Q99KI0 [Aconitate hydratase, mitochondrial ...]	1
Q99KI0 [Aconitate hydratase, mitochondrial ...]	2
Q99KJ8 [Dynactin subunit 2 ...]	1
Q99KJ8 [Dynactin subunit 2 ...]	2
Q99KQ4 [Nicotinamide phosphoribosyltransferase ...]	2
Q99L45 [Eukaryotic translation initiation factor 2 subunit ...]	1
Q99LB4;P24452;D3YZN3;D3YU77;D3YTL5;D3Z4K5 [Macrophage-capping protein ...]	1
Q99LB4;P24452;D3YZN3;D3YU77;D3YTL5;D3Z4K5 [Macrophage-capping protein ...]	2
Q99P58 [Ras-related protein Rab-27B ...]	1
Q99P58 [Ras-related protein Rab-27B ...]	2
Q99PT1 [Rho GDP-dissociation inhibitor 1 ...]	1
Q99PT1 [Rho GDP-dissociation inhibitor 1 ...]	2
Q9CPX4;A0A1B0GR60;P29391;A0A1B0GRH4;P49945;A0A1Y7VNT9 [Ferritin;Ferritin light chain 1;Ferritin light cha ...]	1
Q9CPX4;A0A1B0GR60;P29391;A0A1B0GRH4;P49945;A0A1Y7VNT9 [Ferritin;Ferritin light chain 1;Ferritin light cha ...]	2
Q9CQI6;A0A1D5RLP1 [Coactosin-like protein ...]	1
Q9CQI6;A0A1D5RLP1 [Coactosin-like protein ...]	2
Q9CQR2 [40S ribosomal protein S21 ...]	1
Q9CQR2 [40S ribosomal protein S21 ...]	2
Q9CQV8;A2A5N1 [14-3-3 protein beta/alpha;14-3-3 protein beta/alph ...]	1
Q9CQV8;A2A5N1 [14-3-3 protein beta/alpha;14-3-3 protein beta/alph ...]	2
Q9CQW9;A0A1B0GT68;Q99J93 [Interferon-induced transmembrane protein 3;Interfe ...]	1
Q9CQW9;A0A1B0GT68;Q99J93 [Interferon-induced transmembrane protein 3;Interfe ...]	2
Q9CQX2 [Cytochrome b5 type B ...]	1
Q9CR04 [Huntingtin-interacting protein M ...]	2
Q9CR16 [Peptidyl-prolyl cis-trans isomerase D ...]	1
Q9CR16 [Peptidyl-prolyl cis-trans isomerase D ...]	2
Q9CR57 [60S ribosomal protein L14 ...]	1
Q9CR57 [60S ribosomal protein L14 ...]	2
Q9CR86 [Calcium-regulated heat stable protein 1 ...]	2
Q9CVB6;D3YXG6;A0A087WRT2 [Actin-related protein 2/3 complex subunit 2 ...]	1
Q9CVB6;D3YXG6;A0A087WRT2 [Actin-related protein 2/3 complex subunit 2 ...]	2
Q9CWJ9 [Bifunctional purine biosynthesis protein PURH;Phos ...]	1
Q9CWJ9 [Bifunctional purine biosynthesis protein PURH;Phos ...]	2
Q9CX34 [Suppressor of G2 allele of SKP1 homolog ...]	1
Q9CX34 [Suppressor of G2 allele of SKP1 homolog ...]	2
Q9CXW4;A2BH06 [60S ribosomal protein L11 ...]	1
Q9CZ13;A0A0A6YW82 [Cytochrome b-c1 complex subunit 1, mitochondrial ...]	1
Q9CZ13;A0A0A6YW82 [Cytochrome b-c1 complex subunit 1, mitochondrial ...]	2
Q9CZM2;B8JKK2 [60S ribosomal protein L15;Ribosomal protein L15 ...]	1
Q9CZM2;B8JKK2 [60S ribosomal protein L15;Ribosomal protein L15 ...]	2
Q9CZX8;D3YUT3;D3YUG3;D3Z5R8;D3Z722;S4R223 [40S ribosomal protein S19 ...]	1
Q9CZX8;D3YUT3;D3YUG3;D3Z5R8;D3Z722;S4R223 [40S ribosomal protein S19 ...]	2
Q9D0D4 [Probable dimethyladenosine transferase ...]	1
Q9D0I9 [Arginine--tRNA ligase, cytoplasmic ...]	1
Q9D0I9 [Arginine--tRNA ligase, cytoplasmic ...]	2
Q9D0J8 [Parathymosin ...]	1
Q9D0J8 [Parathymosin ...]	2
Q9D132 [Uroplakin-1a ...]	1
Q9D132 [Uroplakin-1a ...]	2
Q9D154;Z4YK03;Q8VHP7;Q5SV42 [Leukocyte elastase inhibitor A ...]	1
Q9D154;Z4YK03;Q8VHP7;Q5SV42 [Leukocyte elastase inhibitor A ...]	2
Q9D2V7 [Coronin-7 ...]	1
Q9D2V7 [Coronin-7 ...]	2
Q9D668 [Arrestin domain-containing protein 2 ...]	1
Q9D668 [Arrestin domain-containing protein 2 ...]	2
Q9D6Y7;A0A1B0GT40 [Mitochondrial peptide methionine sulfoxide reducta ...]	1
Q9D6Y7;A0A1B0GT40 [Mitochondrial peptide methionine sulfoxide reducta ...]	2
Q9D819 [Inorganic pyrophosphatase ...]	1
Q9D819 [Inorganic pyrophosphatase ...]	2
Q9D898 [Actin-related protein 2/3 complex subunit 5-like p ...]	1
Q9D898 [Actin-related protein 2/3 complex subunit 5-like p ...]	2
Q9D8D6;B2RV77 [ ...]	1
Q9D8D6;B2RV77 [ ...]	2
Q9D8E6 [60S ribosomal protein L4 ...]	1
Q9D8E6 [60S ribosomal protein L4 ...]	2
Q9D8N0 [Elongation factor 1-gamma ...]	1
Q9D8N0 [Elongation factor 1-gamma ...]	2
Q9D997;Q9QZ08;D3YXG2 [N-acetyl-D-glucosamine kinase ...]	1
Q9D997;Q9QZ08;D3YXG2 [N-acetyl-D-glucosamine kinase ...]	2
Q9DAY9;Q5SQB0;Q5SQB5;Q61937 [Nucleophosmin ...]	1
Q9DAY9;Q5SQB0;Q5SQB5;Q61937 [Nucleophosmin ...]	2
Q9DB77;A0A140LI98 [Cytochrome b-c1 complex subunit 2, mitochondrial ...]	1
Q9DB77;A0A140LI98 [Cytochrome b-c1 complex subunit 2, mitochondrial ...]	2
Q9DBB9 [Carboxypeptidase N subunit 2 ...]	1
Q9DBB9 [Carboxypeptidase N subunit 2 ...]	2
Q9DBJ1;O70250 [Phosphoglycerate mutase 1;Phosphoglycerate mutase ...]	1
Q9DBJ1;O70250 [Phosphoglycerate mutase 1;Phosphoglycerate mutase ...]	2
Q9DBS1 [Transmembrane protein 43 ...]	1
Q9DBS1 [Transmembrane protein 43 ...]	2
Q9DC51 [Guanine nucleotide-binding protein G(k) subunit al ...]	1
Q9DC51 [Guanine nucleotide-binding protein G(k) subunit al ...]	2
Q9DCD0 [6-phosphogluconate dehydrogenase, decarboxylating ...]	1
Q9DCD0 [6-phosphogluconate dehydrogenase, decarboxylating ...]	2
Q9DCM0 [Persulfide dioxygenase ETHE1, mitochondrial ...]	1
Q9DCM0 [Persulfide dioxygenase ETHE1, mitochondrial ...]	2
Q9EQ06 [Estradiol 17-beta-dehydrogenase 11 ...]	1
Q9EQ06 [Estradiol 17-beta-dehydrogenase 11 ...]	2
Q9EQ20 [Methylmalonate-semialdehyde dehydrogenase [acylati ...]	1
Q9EQ20 [Methylmalonate-semialdehyde dehydrogenase [acylati ...]	2
Q9EQH3 [Vacuolar protein sorting-associated protein 35 ...]	1
Q9EQH3 [Vacuolar protein sorting-associated protein 35 ...]	2
Q9ERI2 [Ras-related protein Rab-27A ...]	1
Q9ERI2 [Ras-related protein Rab-27A ...]	2
Q9ERL7;D3Z2F6;D3YY16;A0A2I3BR94;A0A2I3BPS1;Q9CQI3 [Glia maturation factor gamma;Glia maturation facto ...]	1
Q9ERL7;D3Z2F6;D3YY16;A0A2I3BR94;A0A2I3BPS1;Q9CQI3 [Glia maturation factor gamma;Glia maturation facto ...]	2
Q9ET01;Q3UEJ6;E9PUM3 [Glycogen phosphorylase, liver form;Alpha-1,4 gluca ...]	1
Q9ET01;Q3UEJ6;E9PUM3 [Glycogen phosphorylase, liver form;Alpha-1,4 gluca ...]	2
Q9JHI5 [Isovaleryl-CoA dehydrogenase, mitochondrial ...]	2
Q9JI91;O88990 [Alpha-actinin-2;Alpha-actinin-3 ...]	1
Q9JI91;O88990 [Alpha-actinin-2;Alpha-actinin-3 ...]	2
Q9JI95;Q64433 [10 kDa heat shock protein, mitochondrial ...]	1
Q9JI95;Q64433 [10 kDa heat shock protein, mitochondrial ...]	2
Q9JII6;B1AXW3 [Alcohol dehydrogenase [NADP(+)] ...]	1
Q9JII6;B1AXW3 [Alcohol dehydrogenase [NADP(+)] ...]	2
Q9JKF1;A0A0U1RNG5;Q3UQ44;A0A0U1RPU3;Q3UQP1;F8VQ29 [Ras GTPase-activating-like protein IQGAP1 ...]	1
Q9JKF1;A0A0U1RNG5;Q3UQ44;A0A0U1RPU3;Q3UQP1;F8VQ29 [Ras GTPase-activating-like protein IQGAP1 ...]	2
Q9JKX8 [Uroplakin-3a ...]	1
Q9JKX8 [Uroplakin-3a ...]	2
Q9JM76;H7BWZ3;A0A0G2JFK7;D3Z2F7;D3Z2F8 [Actin-related protein 2/3 complex subunit 3 ...]	1
Q9JM76;H7BWZ3;A0A0G2JFK7;D3Z2F7;D3Z2F8 [Actin-related protein 2/3 complex subunit 3 ...]	2
Q9QUI0;A0A0A6YXF6;Q62159;A0A0G2JEP8;H3BL56;A0A0A6YWJ1;Q9CR99;P62746 [Transforming protein RhoA;Rho-related GTP-binding ...]	1
Q9QUI0;A0A0A6YXF6;Q62159;A0A0G2JEP8;H3BL56;A0A0A6YWJ1;Q9CR99;P62746 [Transforming protein RhoA;Rho-related GTP-binding ...]	2
Q9QUM9;E0CXB1 [Proteasome subunit alpha type-6 ...]	1
Q9QUM9;E0CXB1 [Proteasome subunit alpha type-6 ...]	2
Q9QXC1;Q6YJU1 [Fetuin-B ...]	1
Q9QXC1;Q6YJU1 [Fetuin-B ...]	2
Q9QXD1 [Peroxisomal acyl-coenzyme A oxidase 2 ...]	2
Q9QXT9 [Zinc finger protein 354B ...]	1
Q9QXT9 [Zinc finger protein 354B ...]	2
Q9QZQ8;Q8CCK0 [Core histone macro-H2A.1 ...]	1
Q9QZQ8;Q8CCK0 [Core histone macro-H2A.1 ...]	2
Q9R0H0 [Peroxisomal acyl-coenzyme A oxidase 1 ...]	2
Q9R0P5;P45591 [Destrin ...]	1
Q9R0P5;P45591 [Destrin ...]	2
Q9R0P9 [Ubiquitin carboxyl-terminal hydrolase isozyme L1 ...]	1
Q9R0P9 [Ubiquitin carboxyl-terminal hydrolase isozyme L1 ...]	2
Q9R0Q6 [Actin-related protein 2/3 complex subunit 1A ...]	1
Q9R0Q6 [Actin-related protein 2/3 complex subunit 1A ...]	2
Q9R111;D3YU09;A0A494B982 [Guanine deaminase ...]	1
Q9R111;D3YU09;A0A494B982 [Guanine deaminase ...]	2
Q9R1P3 [Proteasome subunit beta type-2 ...]	1
Q9R1P3 [Proteasome subunit beta type-2 ...]	2
Q9R1Z7 [6-pyruvoyl tetrahydrobiopterin synthase ...]	2
Q9WTL2 [Ras-related protein Rab-25 ...]	1
Q9WTL2 [Ras-related protein Rab-25 ...]	2
Q9WU78 [Programmed cell death 6-interacting protein ...]	1
Q9WU78 [Programmed cell death 6-interacting protein ...]	2
Q9WUH2 [LIM/homeobox protein Lhx9 ...]	1
Q9WUH2 [LIM/homeobox protein Lhx9 ...]	2
Q9WUK2 [Eukaryotic translation initiation factor 4H ...]	1
Q9WUM3;D3YUG6;A0A494B9Y4 [Coronin-1B;Coronin ...]	1
Q9WUM3;D3YUG6;A0A494B9Y4 [Coronin-1B;Coronin ...]	2
Q9WV55 [Vesicle-associated membrane protein-associated pro ...]	1
Q9WV55 [Vesicle-associated membrane protein-associated pro ...]	2
Q9WVA4;A0A0A6YXG6;Q9R1Q8 [Transgelin-2 ...]	1
Q9WVA4;A0A0A6YXG6;Q9R1Q8 [Transgelin-2 ...]	2
Q9WVF5;Q01279 [Epidermal growth factor receptor ...]	1
Q9WVF5;Q01279 [Epidermal growth factor receptor ...]	2
Q9WVK4 [EH domain-containing protein 1 ...]	1
Q9WVK4 [EH domain-containing protein 1 ...]	2
Q9WVK5 [Beta-1,4-galactosyltransferase 6;Glucosylceramide ...]	1
Q9Z183;E9QAM4;Q9Z184 [Protein-arginine deiminase type-4 ...]	1
Q9Z183;E9QAM4;Q9Z184 [Protein-arginine deiminase type-4 ...]	2
Q9Z1N5;G3UXI6;Q8VDW0;D6RHT5 [Spliceosome RNA helicase Ddx39b;ATP-dependent RNA ...]	1
Q9Z1N5;G3UXI6;Q8VDW0;D6RHT5 [Spliceosome RNA helicase Ddx39b;ATP-dependent RNA ...]	2
Q9Z1Q2 [Abhydrolase domain-containing protein 16A ...]	1
Q9Z1Q5 [Chloride intracellular channel protein 1 ...]	1
Q9Z1Q5 [Chloride intracellular channel protein 1 ...]	2
Q9Z2M7 [Phosphomannomutase 2 ...]	1
Q9Z2M7 [Phosphomannomutase 2 ...]	2
Q9Z2U0;A0A338P7D7;Q9CWH6;B7ZMS4 [Proteasome subunit alpha type-7;Proteasome subunit ...]	1
Q9Z2U0;A0A338P7D7;Q9CWH6;B7ZMS4 [Proteasome subunit alpha type-7;Proteasome subunit ...]	2
Q9Z2U1 [Proteasome subunit alpha type-5 ...]	1
Q9Z2U1 [Proteasome subunit alpha type-5 ...]	2
Q9Z2X1;J3QM80;J3QMT0 [Heterogeneous nuclear ribonucleoprotein F;Heteroge ...]	1
Q9Z2X1;J3QM80;J3QMT0 [Heterogeneous nuclear ribonucleoprotein F;Heteroge ...]	2
S4R1E5;O70325 [Glutathione peroxidase;Phospholipid hydroperoxide ...]	1
S4R1M0;P06800 [Protein-tyrosine-phosphatase;Receptor-type tyrosin ...]	1
S4R1M0;P06800 [Protein-tyrosine-phosphatase;Receptor-type tyrosin ...]	2
S4R1N6;F6YVP7;P62270;A0A1Y7VKY1;A0A3Q4EGP3 [40S ribosomal protein S18 ...]	1
S4R1N6;F6YVP7;P62270;A0A1Y7VKY1;A0A3Q4EGP3 [40S ribosomal protein S18 ...]	2
S4R1W1;P16858;A0A1D5RLD8;A0A0A0MQF6;S4R257;S4R1W8;V9GX06;A0A0R4J0X7;S4R2G5;Q64467;S4R1N5;V9GXK0 [Glyceraldehyde-3-phosphate dehydrogenase ...]	1
S4R1W1;P16858;A0A1D5RLD8;A0A0A0MQF6;S4R257;S4R1W8;V9GX06;A0A0R4J0X7;S4R2G5;Q64467;S4R1N5;V9GXK0 [Glyceraldehyde-3-phosphate dehydrogenase ...]	2
S4R293;F8WH69;Q09014 [Neutrophil cytosol factor 1 ...]	1
S4R293;F8WH69;Q09014 [Neutrophil cytosol factor 1 ...]	2
Z4YKB8;Q3TEA8;A2AM65;Z4YKA3;A2AM63;A2AM69;A2AM70;A2AM62 [Heterochromatin protein 1-binding protein 3 ...]	1
Z4YKB8;Q3TEA8;A2AM65;Z4YKA3;A2AM63;A2AM69;A2AM70;A2AM62 [Heterochromatin protein 1-binding protein 3 ...]	2
