# Supplementary material for: Inhibiting host-protein deposition on urinary catheters reduces associated urinary tract infections
Source: eLife. 2022 Mar 29;11:e75798. doi: 10.7554/eLife.75798 (PMC8986317; doi:10.7554/eLife.75798)
Supplement: Figure 6—source data 1. — Individual data from all figures involving small datasets displayed in individual tabs of this source file. This includes Figures 1B and 2A-F, Figure 3B, Figure 4, Figure 1—figure supplement 1 and Figure 2—figure supplement 1. [file elife-75798-fig6-data1.zip › Flores_Data/AF1_limma-contrasts-matrix_ProteinGroups.txt]

	Cat_3-Cat_1	Cat_4-Cat_1	Cat_5-Cat_1	Cat_6-Cat_1	Cat_7-Cat_1	Cat_8-Cat_1	Cat_10-Cat_1	Cat_9-Cat_1	Cat_4-Cat_3	Cat_5-Cat_3	Cat_6-Cat_3	Cat_7-Cat_3	Cat_8-Cat_3	Cat_10-Cat_3	Cat_9-Cat_3	Cat_5-Cat_4	Cat_6-Cat_4	Cat_7-Cat_4	Cat_8-Cat_4	Cat_10-Cat_4	Cat_9-Cat_4	Cat_6-Cat_5	Cat_7-Cat_5	Cat_8-Cat_5	Cat_10-Cat_5	Cat_9-Cat_5	Cat_7-Cat_6	Cat_8-Cat_6	Cat_10-Cat_6	Cat_9-Cat_6	Cat_8-Cat_7	Cat_10-Cat_7	Cat_9-Cat_7	Cat_10-Cat_8	Cat_9-Cat_8	Cat_9-Cat_10
Cat_1	-1	-1	-1	-1	-1	-1	-1	-1	0	0	0	0	0	0	0	0	0	0	0	0	0	0	0	0	0	0	0	0	0	0	0	0	0	0	0	0
Cat_3	1	0	0	0	0	0	0	0	-1	-1	-1	-1	-1	-1	-1	0	0	0	0	0	0	0	0	0	0	0	0	0	0	0	0	0	0	0	0	0
Cat_4	0	1	0	0	0	0	0	0	1	0	0	0	0	0	0	-1	-1	-1	-1	-1	-1	0	0	0	0	0	0	0	0	0	0	0	0	0	0	0
Cat_5	0	0	1	0	0	0	0	0	0	1	0	0	0	0	0	1	0	0	0	0	0	-1	-1	-1	-1	-1	0	0	0	0	0	0	0	0	0	0
Cat_6	0	0	0	1	0	0	0	0	0	0	1	0	0	0	0	0	1	0	0	0	0	1	0	0	0	0	-1	-1	-1	-1	0	0	0	0	0	0
Cat_7	0	0	0	0	1	0	0	0	0	0	0	1	0	0	0	0	0	1	0	0	0	0	1	0	0	0	1	0	0	0	-1	-1	-1	0	0	0
Cat_8	0	0	0	0	0	1	0	0	0	0	0	0	1	0	0	0	0	0	1	0	0	0	0	1	0	0	0	1	0	0	1	0	0	-1	-1	0
Cat_10	0	0	0	0	0	0	1	0	0	0	0	0	0	1	0	0	0	0	0	1	0	0	0	0	1	0	0	0	1	0	0	1	0	1	0	-1
Cat_9	0	0	0	0	0	0	0	1	0	0	0	0	0	0	1	0	0	0	0	0	1	0	0	0	0	1	0	0	0	1	0	0	1	0	1	1
