# Supplementary material for: Inhibiting host-protein deposition on urinary catheters reduces associated urinary tract infections
Source: eLife. 2022 Mar 29;11:e75798. doi: 10.7554/eLife.75798 (PMC8986317; doi:10.7554/eLife.75798)
Supplement: Figure 6—source data 1. — Individual data from all figures involving small datasets displayed in individual tabs of this source file. This includes Figures 1B and 2A-F, Figure 3B, Figure 4, Figure 1—figure supplement 1 and Figure 2—figure supplement 1. [file elife-75798-fig6-data1.zip › Flores_Data/AF1_limma-design-matrix_ProteinGroups.txt]

	Cat_1	Cat_3	Cat_4	Cat_5	Cat_6	Cat_7	Cat_8	Cat_10	Cat_9
1	1	0	0	0	0	0	0	0	0
2	1	0	0	0	0	0	0	0	0
3	0	1	0	0	0	0	0	0	0
4	0	1	0	0	0	0	0	0	0
5	0	0	1	0	0	0	0	0	0
6	0	0	1	0	0	0	0	0	0
7	0	0	0	1	0	0	0	0	0
8	0	0	0	1	0	0	0	0	0
9	0	0	0	0	1	0	0	0	0
10	0	0	0	0	1	0	0	0	0
11	0	0	0	0	0	1	0	0	0
12	0	0	0	0	0	1	0	0	0
13	0	0	0	0	0	0	1	0	0
14	0	0	0	0	0	0	1	0	0
15	0	0	0	0	0	0	0	1	0
16	0	0	0	0	0	0	0	1	0
17	0	0	0	0	0	0	0	0	1
18	0	0	0	0	0	0	0	0	1
