# Supplementary material for: Inhibiting host-protein deposition on urinary catheters reduces associated urinary tract infections
Source: eLife. 2022 Mar 29;11:e75798. doi: 10.7554/eLife.75798 (PMC8986317; doi:10.7554/eLife.75798)
Supplement: Figure 6—source data 1. — Individual data from all figures involving small datasets displayed in individual tabs of this source file. This includes Figures 1B and 2A-F, Figure 3B, Figure 4, Figure 1—figure supplement 1 and Figure 2—figure supplement 1. [file elife-75798-fig6-data1.zip › Flores_Data/AF1_limma-input_ProteinGroups.txt]

	Cat_1.b1t1	Cat_1.b2t1	Cat_3.b1t1	Cat_3.b2t1	Cat_4.b1t1	Cat_4.b2t1	Cat_5.b1t1	Cat_5.b2t1	Cat_6.b1t1	Cat_6.b2t1	Cat_7.b1t1	Cat_7.b2t1	Cat_8.b1t1	Cat_8.b2t1	Cat_10.b1t1	Cat_10.b2t1	Cat_9.b1t1	Cat_9.b2t1
A0A075B5P3;A0A0A6YVP0;P01867 [Ig gamma-2B chain C region ...]	4609540	11119100	3823840	4118940	20565100	16621500	5865570	5798670	582510	1317740	582510	582510	582510	582510	582510	582510	582510	582510
A0A075B5P4;A0A0A6YWR2;P01868;P01869 [Ig gamma-1 chain C region secreted form;Ig gamma-1 ...]	7344800	7146900	8391000	8835300	194170	194170	7517600	6530400	194170	194170	1038200	1046600	194170	1928300	194170	194170	194170	194170
A0A075B5P5;A0A1Y7VJN6;P03987 [Ig gamma-3 chain C region ...]	388340	1072830	6765400	4677270	4590870	388340	388340	388340	388340	388340	388340	388340	388340	388340	388340	388340	388340	388340
A0A075B5P6;A0A075B6A0;P01872 [Ig mu chain C region ...]	2981030	1994840	582510	2856040	35402600	28384500	5390470	2265240	582510	582510	582510	582510	582510	582510	582510	582510	582510	582510
A0A087WPL5;E9QNN1;O70133;Q3UR42 [ATP-dependent RNA helicase A ...]	194170	194170	194170	194170	3809000	2990000	194170	194170	194170	194170	194170	194170	194170	194170	194170	194170	194170	194170
A0A087WRJ2;A0A087WPF8;A0A087WSR2;E9QN99;A0A087WP24;Q8VCR7;A0A1L1SRH5;A0A1L1SUX1 [Alpha/beta hydrolase domain-containing protein 14B ...]	582510	194170	582510	194170	582510	194170	582510	194170	582510	194170	5348400	194170	582510	194170	2463470	1128900	582510	194170
A0A087WSQ5;Q99K94;Q8C3V4;A0A087WSP5;P42225 [Signal transducer and activator of transcription;S ...]	194170	388340	194170	388340	6673400	12347200	194170	388340	194170	388340	194170	388340	194170	388340	194170	388340	194170	388340
A0A0A0MQA5;P68368;A0A087WQS4;A0A087WRB4;A0A087WSB0;A0A087WSL5 [Tubulin alpha-4A chain ...]	582510	582510	28332900	17441500	168922000	161087000	6151870	5330240	13681800	12307400	21420000	15612800	582510	582510	582510	8706920	582510	582510
A0A0A0MQG2;Q62261 [Spectrin beta chain, non-erythrocytic 1 ...]	388340	388340	388340	388340	7173900	7364500	388340	388340	388340	388340	388340	388340	388340	388340	388340	388340	388340	388340
A0A0A0MQM0;P63242;Q8BGY2;J3QPS8 [Eukaryotic translation initiation factor 5A;Eukary ...]	582510	194170	9437170	194170	41274170	10744000	582510	194170	582510	194170	582510	194170	582510	194170	582510	194170	582510	194170
A0A0A6YW67;E9Q9J0;E9Q4P0;E9Q5F6;E9QNP0;Q5SX22;P62984;P62983;P0CG49;P0CG50 [Ubiquitin-60S ribosomal protein L40;Ubiquitin;60S ...]	4633840	4503540	28251700	24228900	117447170	102723170	9404940	10307140	31249170	31904970	50661570	42063340	3377340	3488140	11975270	15989470	1980940	2029740
A0A0A6YW77;P11672 [Neutrophil gelatinase-associated lipocalin ...]	582510	582510	22376470	16846340	55671170	134184000	582510	582510	14138340	582510	582510	582510	582510	582510	582510	582510	582510	582510
A0A0A6YY34;A0A0A6YVV2;P11352 [Glutathione peroxidase;Glutathione peroxidase 1 ...]	582510	582510	9369500	6085470	43602000	37309000	582510	582510	582510	582510	582510	582510	582510	582510	582510	582510	582510	582510
A0A0G2JEU1;P47738;A0A0G2JF60;A0A0G2JFQ0;D3YYF3;Q62148;G3UWP3;P24549;Q9JHW9;Q9CZS1 [Aldehyde dehydrogenase, mitochondrial ...]	582510	582510	17006300	16232100	84207000	93944000	985960	582510	2632340	7009470	582510	582510	582510	582510	582510	582510	582510	582510
A0A0G2JFQ3;D3YZT0;D3Z629;S4R1R7;A0A0G2JES3;A0A140T8T4;P51410 [60S ribosomal protein L9 ...]	194170	194170	194170	194170	7156700	7394300	194170	194170	194170	194170	194170	194170	194170	194170	194170	194170	194170	194170
A0A0G2JGD2;P07091 [Protein S100-A4 ...]	194170	194170	194170	194170	3078100	4395300	194170	194170	194170	194170	194170	194170	194170	194170	194170	194170	194170	194170
A0A0G2JGX3;Q9CQQ7 [ATP synthase F(0) complex subunit B1, mitochondria ...]	194170	388340	194170	388340	3190900	2793970	194170	388340	194170	388340	194170	388340	194170	388340	194170	1012210	194170	388340
A0A0J9YUE9;Q3T9X3;A0A0J9YUN4;Q3TCR7;G3X9G4;F8WIV5;P39053;P39054;G3UZZ3;D6RH60;G3UY64;G3UXX2;E9QLL2;Q8BZ98 [Dynamin-1;Dynamin-2 ...]	388340	388340	388340	388340	10390700	6399870	388340	388340	388340	388340	388340	1069320	388340	388340	388340	388340	388340	388340
A0A0J9YUZ4;P63158;A0A0J9YUD8;D3YVC6;D3YZ18 [High mobility group protein B1 ...]	582510	582510	14320900	10899870	72419700	88060600	582510	582510	582510	582510	582510	582510	582510	582510	582510	582510	582510	582510
A0A0N4SV66;Q8CGP4;C0HKE9;C0HKE8;C0HKE7;C0HKE6;C0HKE5;C0HKE4;C0HKE3;C0HKE2;C0HKE1;Q8CGP6;Q8R1M2;Q8CGP7;Q8CGP5;Q8BFU2;Q64523;Q6GSS7;P27661;Q64522;G3UWL7 [Histone H2A;Histone H2A type 1-H;Histone H2A.J;His ...]	582510	26240340	743171000	720935000	2178599000	2213500000	83590900	84609100	188643170	173091170	122369200	120131400	582510	14705340	72195070	44261340	26568460	25629340
A0A0N4SVB8;F6QKK2;Q9CQW2;Q8VEH3 [ADP-ribosylation factor-like protein 8B;ADP-ribosy ...]	194170	388340	194170	1508070	5073900	5403970	194170	388340	194170	388340	194170	388340	194170	388340	194170	388340	194170	388340
A0A0N4SW34;A0A0N4SW07;P50518 [V-type proton ATPase subunit E 1 ...]	194170	194170	194170	194170	6139700	6717900	194170	194170	194170	194170	194170	194170	194170	194170	194170	194170	194170	194170
A0A0R4IZY6;Q61096;F6ZK01 [Myeloblastin ...]	582510	582510	8603340	11353870	62638200	62963300	2575040	2391140	11927870	10302670	3236650	3018370	582510	582510	582510	582510	582510	582510
A0A0R4J039;Q9ESB3;A0A338P6H8 [Histidine-rich glycoprotein ...]	2635640	14253100	29030200	23347500	30308800	20882300	16260700	14344300	2327740	2232340	13963300	12900770	582510	2458390	582510	582510	1634940	1342180
A0A0R4J043;P28825 [Meprin A subunit alpha ...]	852880	793900	4892000	4918000	388340	388340	669730	591000	3093570	3493970	388340	837180	929340	921450	388340	388340	999230	1082570
A0A0R4J083;P51174 [Long-chain specific acyl-CoA dehydrogenase, mitoch ...]	582510	194170	2769940	2860300	2263040	194170	582510	194170	582510	194170	582510	194170	582510	194170	3511240	194170	582510	194170
A0A0R4J093;Q9DBP5 [UMP-CMP kinase ...]	582510	388340	582510	388340	11776670	5572370	582510	388340	582510	388340	582510	388340	582510	388340	1439240	1302870	582510	388340
A0A0R4J0B2;Q8VCI0 [Phospholipase B-like 1;Phospholipase B-like 1 chai ...]	388340	388340	388340	388340	12823900	11557300	388340	388340	388340	388340	388340	388340	388340	388340	388340	388340	388340	388340
A0A0R4J0I1;P07759;Q80X76 [Serine protease inhibitor A3K ...]	117597000	124110000	260865000	265526000	478643000	496380000	42515470	59464300	11412340	39810000	21010100	16007200	5730540	14346340	5176770	4801270	2394240	2395340
A0A0R4J0R1;O70404;A0A0U1RPE8 [Vesicle-associated membrane protein 8 ...]	582510	388340	3397770	1749270	13936200	7699400	582510	388340	582510	388340	582510	388340	582510	388340	582510	388340	582510	388340
A0A0R4J0S8;Q80YF6 [Uroplakin-3b ...]	388340	194170	2975870	2192000	388340	194170	388340	194170	388340	194170	2080770	194170	388340	194170	388340	194170	388340	194170
A0A0R4J0X5;A0A0A0MQA3;Q00896;P07758 [Alpha-1-antitrypsin 1-3;Alpha-1-antitrypsin 1-1 ...]	644513000	718240000	877830000	850740000	1187780000	856560000	425395000	400057000	215739000	212360000	154759000	154104000	148309000	151475000	38589900	39814100	89722300	94038000
A0A0R4J1C2;A0A0R4IZW8;O88456;Q9D7J7 [Calpain small subunit 1;Calpain small subunit 2 ...]	194170	388340	194170	388340	194170	6959270	194170	803280	986410	1208470	1297200	1368370	194170	388340	973700	1129710	194170	388340
A0A0R4J2B2;Q6WVG3;Q8C7J6 [BTB/POZ domain-containing protein KCTD12 ...]	194170	194170	194170	194170	9384200	2501400	194170	194170	194170	194170	194170	194170	194170	194170	194170	194170	194170	194170
A0A0U1RNJ1;P19096 [Fatty acid synthase;[Acyl-carrier-protein] S-acety ...]	582510	582510	582510	582510	582510	582510	582510	582510	582510	582510	2044800	4213200	582510	582510	1093180	1303320	582510	582510
A0A0U1RNR3;A0A0U1RNK9;A0A0U1RNP5;A0A0N4SVE0;Q9DCW4 [Electron transfer flavoprotein subunit beta ...]	194170	194170	194170	194170	194170	194170	194170	194170	194170	194170	782450	796460	194170	194170	1168100	194170	194170	194170
A0A1B0GR11;Q93092 [Transaldolase ...]	582510	582510	23528500	13710200	84561000	89272000	1484540	582510	3214240	3388340	7426900	582510	582510	582510	1322100	2844140	582510	582510
A0A1B0GR41;A0A1C7CYU3;Q02819 [Nucleobindin-1 ...]	194170	194170	194170	194170	194170	194170	194170	194170	194170	194170	194170	194170	194170	194170	409510	439690	194170	194170
A0A1B0GRR3;P62281;A0A1B0GSE8 [40S ribosomal protein S11 ...]	388340	194170	388340	194170	5884500	194170	388340	194170	388340	194170	388340	1341400	388340	194170	388340	194170	388340	194170
A0A1B0GS70;Q9R1P4 [Proteasome subunit alpha type-1 ...]	388340	388340	2653670	388340	8545670	8478170	388340	388340	388340	388340	388340	388340	388340	388340	388340	2425970	388340	388340
A0A1B0GSB2;P19253;A0A1B0GQW6;A0A1B0GSL5;A0A1B0GSC2;A0A1B0GRH1;A0A1B0GSF0;A0A1B0GSQ6;A0A1B0GTA1;A0A1B0GS68 [60S ribosomal protein L13a ...]	388340	194170	388340	194170	4172570	4235700	388340	194170	388340	194170	388340	194170	388340	194170	1000820	194170	388340	194170
A0A1B0GSG5;Q91VI7;A0A1B0GRG4 [Ribonuclease inhibitor ...]	582510	582510	4292300	5049400	22501900	13393670	1227040	1153340	582510	582510	4870170	6032170	582510	582510	3451670	4326600	582510	582510
A0A1B0GSR9;A0A1B0GSX0;P06151;A0A1B0GSL7;A0A1B0GT41;A0A1B0GQX5;D3YZQ9;A0A1B0GRW9;A0A1B0GS79;A0A1B0GRC1;A0A1B0GRS2;A0A1B0GSR2;D3YVR7;D3YZE4;A0A1B0GRE9;P00342 [L-lactate dehydrogenase A chain;L-lactate dehydrog ...]	6276470	6281770	25659100	24579500	231724000	235378000	6182670	10599600	20988600	16907100	40104300	26830770	1762740	1776340	14660900	9886570	2362140	3696770
A0A1D5RLV1;A0A571BEG4;A2A839;A2A838;A2AD32;A2A842;A2A841;P48193 [Protein 4.1 ...]	194170	194170	194170	194170	5277000	5335400	194170	194170	194170	194170	194170	194170	194170	194170	194170	194170	194170	194170
A0A1L1SQA8;P62852 [40S ribosomal protein S25 ...]	1464270	2066940	5055170	3979240	26515400	26206670	1830670	2297940	1695570	1956940	7713970	5041540	388340	582510	3208070	5675870	641700	582510
A0A1L1STC6;Q6ZWR6;A0A1L1SRV6 [Nesprin-1 ...]	194170	194170	194170	194170	5789300	2607500	194170	194170	194170	194170	2049200	194170	194170	194170	194170	194170	194170	194170
A0A1L1STN8;P37804 [Transgelin ...]	194170	388340	2115000	3940900	194170	388340	194170	388340	194170	388340	194170	388340	194170	388340	194170	388340	194170	388340
A0A1L1SU53;Q9Z0P5;A0A087WRG4;A0A1L1STC8 [Twinfilin-2 ...]	582510	582510	2931840	3084940	32428770	31639070	582510	582510	582510	582510	582510	582510	582510	582510	582510	582510	582510	582510
A0A1L1SUU4;Q9ERN0 [Secretory carrier-associated membrane protein 2 ...]	194170	194170	1353300	1899500	194170	194170	194170	194170	194170	194170	194170	194170	194170	194170	194170	194170	194170	194170
A0A1L1SV25;P57780;E9Q2W9;D3Z761;D3Z0L8;A0A1L1SVJ6;Q91ZE6;E9PX29 [Alpha-actinin-4 ...]	582510	582510	1534440	582510	41902900	61647000	582510	582510	582510	582510	582510	1163870	582510	582510	1177090	582510	582510	582510
A0A1W2P6F6;A0A1W2P7Q9;Q60605;A0A1W2P6G5 [Myosin light polypeptide 6 ...]	1047120	388340	15303000	17491000	82326000	29750170	388340	388340	388340	388340	1752270	388340	388340	388340	388340	388340	388340	388340
A0A1W2P720;A0A1W2P869;A0A1W2P6N3;Q99JZ4;Q9CQC9;P36536 [GTP-binding protein SAR1b;GTP-binding protein SAR1 ...]	194170	194170	194170	194170	194170	11925000	194170	194170	194170	194170	1476100	194170	194170	194170	1150700	194170	194170	194170
A0A1W2P768;P84228;P68433;F8WI35;P84244;P02301;E0CZ27;E0CYN1;E0CYR7 [Histone H3.2;Histone H3.1;Histone H3;Histone H3.3; ...]	23398340	22886340	451758000	427752000	1930050000	1788430000	65338170	70954170	153234170	175543000	103843300	115174000	582510	582510	55165170	40511340	14067340	15251340
A0A1W2P7X3;Q561M1;Q9D358 [Low molecular weight phosphotyrosine protein phosp ...]	194170	194170	194170	194170	6211200	5693100	194170	194170	1140400	194170	194170	969190	194170	194170	194170	194170	194170	194170
A0A1W2P7Z3;P61089 [Ubiquitin-conjugating enzyme E2 N ...]	194170	194170	3809800	2996200	5771500	194170	194170	194170	2305700	2792200	2135800	194170	194170	194170	194170	194170	194170	194170
A0A1Y7VLY5;A0A1Y7VKA0;A0A1Y7VKC6;Q9DB29 [Isoamyl acetate-hydrolyzing esterase 1 homolog ...]	194170	388340	194170	388340	194170	388340	194170	388340	194170	388340	1243600	2851700	194170	388340	498810	764260	194170	388340
A0A286YCZ3;E9Q390;A0A286YDF5;Q69ZN7;A0A286YE65 [Myoferlin ...]	582510	582510	582510	582510	582510	3692440	582510	582510	582510	582510	582510	582510	582510	582510	3650810	3375430	582510	582510
A0A286YDW8;Q99JI4 [26S proteasome non-ATPase regulatory subunit 6 ...]	388340	388340	388340	388340	10481800	10970300	388340	388340	388340	388340	388340	388340	388340	388340	388340	388340	388340	388340
A0A2C9F2D2;Q07076;A0A286YCW4 [Annexin A7 ...]	582510	582510	582510	582510	10513570	10107570	582510	582510	1695440	1758440	2116440	1424040	582510	582510	1294040	2794870	582510	582510
A0A2I3BPH9;A0A2I3BRN5;Q921M7 [Protein FAM49B ...]	194170	194170	194170	3055800	2866800	194170	194170	194170	194170	194170	194170	194170	194170	194170	194170	194170	194170	194170
A0A2K6EDJ7;E9Q5L2;E9PVD2;A6X935;CON__Q3T052 [Inter alpha-trypsin inhibitor, heavy chain 4 ...]	11484300	14034300	31288900	29872200	46836000	43723000	12924600	14231600	12946300	8485500	4707000	2115640	6923800	6614600	582510	582510	1894740	1847040
A0A2R8VHF9;E9QPE7;A0A338P6K2;O08638 [Myosin-11 ...]	1239250	582510	6284740	11735600	45201700	45121000	582510	1145910	1830940	582510	3127500	2631540	582510	582510	1199640	1250110	582510	582510
A0A2R8VHP3;Q6IFZ8;D3Z6R0 [ ...]	27134970	10389340	5883540	90959600	22069170	17156670	22632570	12072200	27487570	28002870	14160270	2862440	4738240	18522970	582510	582510	8293370	6155940
A0A338P684;P48758 [Carbonyl reductase [NADPH] 1 ...]	582510	388340	582510	388340	582510	388340	582510	388340	582510	388340	3715570	1405570	582510	388340	2420970	1417770	582510	388340
A0A338P742;A0A338P6Y7;Q9D7G4 [Protein EURL homolog ...]	194170	194170	266320	219680	194170	194170	194170	194170	194170	194170	194170	194170	194170	194170	194170	194170	194170	194170
A0A338P7C0;O09061 [Proteasome subunit beta type-1 ...]	388340	388340	388340	388340	5151770	12885600	388340	388340	969260	388340	4600700	1841670	388340	388340	388340	388340	388340	388340
A0A3B2WCD8;Q3U0V1;A0A3B2W465 [Far upstream element-binding protein 2 ...]	388340	194170	388340	194170	6972570	5815700	388340	194170	388340	194170	946850	194170	388340	194170	388340	194170	388340	194170
A0A3Q4EH04;A0A3Q4L335;A0A3Q4L393;Q8BL97 [Serine/arginine-rich splicing factor 7 ...]	388340	388340	388340	1176560	7101270	7815370	388340	388340	1062030	941700	388340	388340	388340	388340	388340	388340	388340	388340
A0A494B9W3;Q8K1B8;A0A494BBJ8;A0A494B9F7 [Fermitin family homolog 3 ...]	388340	582510	388340	2540040	13518800	13790470	388340	582510	1600570	1820840	388340	582510	388340	582510	388340	582510	388340	582510
A0A494B9Z0;A0A494BBA8;Q642K5;P62862 [40S ribosomal protein S30 ...]	194170	194170	1516200	194170	4858200	194170	194170	194170	1450400	1192100	194170	194170	194170	194170	980230	942400	194170	194170
A0A494BA30;Q8BMJ2 [Leucine--tRNA ligase, cytoplasmic ...]	5810900	5099500	194170	194170	194170	194170	194170	194170	194170	194170	194170	194170	194170	194170	194170	194170	194170	194170
A0A494BA97;Q62422;A0A494B943 [Osteoclast-stimulating factor 1 ...]	388340	194170	6740370	6279500	27426000	11579000	388340	194170	388340	194170	388340	194170	388340	194170	388340	194170	388340	194170
A0A494BBB0;O35350 [Calpain-1 catalytic subunit ...]	582510	582510	582510	582510	20457900	19290400	582510	582510	582510	1579650	5120600	3628870	582510	582510	2154940	2268640	582510	582510
A0A494BBE3;G3X8R0;Q60870 [Receptor expression-enhancing protein;Receptor exp ...]	194170	194170	194170	194170	194170	194170	194170	194170	194170	194170	194170	2067700	194170	194170	1168500	194170	194170	194170
A0A571BEL9;P80317;Q61390 [T-complex protein 1 subunit zeta ...]	582510	582510	582510	20783340	10723170	13219600	582510	582510	837630	868380	2630420	582510	582510	582510	582510	582510	582510	582510
A1BN54;Q7TPR4 [Alpha-actinin-1 ...]	582510	582510	7542170	5193770	63257000	74719000	582510	582510	582510	582510	582510	582510	582510	582510	582510	582510	582510	582510
A2A513;CON__P02535-1;P02535 [Keratin, type I cytoskeletal 10 ...]	51353800	35368340	160492000	189152000	58416000	67475000	11065870	3237140	158536100	155877100	24086500	18323270	9570840	35288170	7874040	10602340	13351340	13202340
A2A817;A2A816;A2A815;A2A813;Q99LX0 [Protein deglycase DJ-1 ...]	194170	388340	194170	388340	3902900	388340	194170	388340	1087500	1368570	194170	388340	194170	388340	194170	1950170	194170	388340
A2AB60;A0A1W2P6X3;Q9JL26 [Formin-like protein 1 ...]	194170	388340	194170	388340	3099300	6142700	194170	388340	194170	388340	194170	388340	194170	388340	194170	388340	194170	388340
A2AE89;P10649;F6WHQ7;P19639;D3YVP6;E9QAC8;D3YVP5;Q80W21;F6Y363;D3YZ29;D3YVP8;G5E8M7;O35660;D3YVP9;E9PV63;E9PVM7;P48774 [Glutathione S-transferase Mu 1 ...]	101695000	93452000	172207000	154424000	161728000	180637000	130116000	134290000	200207000	177672000	531100000	570460000	67952900	57179170	631020000	628440000	108394000	106176000
A2AE91;Q8R5I6 [ ...]	46354340	49984340	63774340	65332340	52945170	57354170	76008340	75819340	73938340	75330340	259732670	255308340	35429340	33840340	247560770	250294870	54119340	53620340
A2AH25;Q5FWK3 [Rho GTPase-activating protein 1 ...]	388340	582510	388340	1446140	5525370	9701470	388340	582510	388340	582510	959480	1082860	388340	582510	388340	821600	388340	582510
A2AKN8;E9PVW0;B8JI96;A2BIN0;P11591 [ ...]	295015000	349290000	2201690000	1687050000	63007300	65812000	279788000	264213000	360515000	414078000	268593000	257301000	215299000	205975000	29885900	18387800	170191000	168933000
A2AKV1;A2AKV2;A2AKV3;Q8C2Q8;A2AKU9;Q91VR2;A2AKV0 [ATP synthase subunit gamma;ATP synthase subunit ga ...]	388340	582510	388340	582510	9480900	12693200	388340	582510	388340	582510	388340	582510	388340	582510	966800	1172850	388340	582510
A2AL12;Q8BG05 [Heterogeneous nuclear ribonucleoprotein A3 ...]	194170	194170	194170	3251800	16831000	194170	194170	194170	194170	194170	194170	194170	194170	194170	194170	194170	194170	194170
A2BIN1;Q4FZE8;A2AKN9;A2BIM8;P02762;P04938;A9C497;A9C496 [Major urinary protein 6;Major urinary proteins 11 ...]	422330000	445290000	2721770000	2433380000	95363000	97185300	279788000	264213000	360515000	414078000	268593000	257301000	215299000	205975000	43324000	35360100	170191000	168933000
A2CEK3;Q9D0F9 [Phosphoglucomutase-1 ...]	388340	194170	388340	194170	2783970	194170	780820	671050	1222470	194170	5148700	194170	388340	194170	388340	194170	388340	194170
A2CEK6;B5X0G2;L7N222 [Major urinary protein 17 ...]	295015000	305371000	1790710000	1311420000	59288170	65812000	231107000	218061000	263936000	270494000	154020000	133582800	100587200	151190600	13306700	13005970	54605000	55160300
A2CEK7 [ ...]	295015000	349290000	2201690000	1728490000	63007300	65812000	279788000	264213000	360515000	414078000	268593000	257301000	215299000	205975000	29885900	18387800	170191000	168933000
A3KGU5;A3KGU7;E9Q447;A3KGU9;P16546 [Spectrin alpha chain, non-erythrocytic 1 ...]	388340	582510	388340	582510	6684900	10710200	388340	582510	388340	582510	388340	582510	388340	582510	388340	582510	388340	582510
A3KMP2 [Tetratricopeptide repeat protein 38 ...]	194170	194170	194170	194170	194170	194170	194170	194170	194170	194170	1230100	1125300	194170	194170	786990	715640	194170	194170
A6BLY7 [Keratin, type I cytoskeletal 28 ...]	19521500	186404170	118457500	113299700	119754170	139174170	200624170	211334170	154846200	121631900	10647170	273064170	273264170	258130900	78441170	388340	209834170	223324170
A6X925;B7ZBY6;B7ZBY7;E9PY39;Q9D2M8;Q9CZY3;B2KF55 [Ubiquitin-conjugating enzyme E2 variant 2;Ubiquiti ...]	194170	388340	194170	388340	3030400	3800670	194170	388340	194170	388340	194170	1507270	194170	388340	194170	388340	194170	388340
A8DUK4;P02088;E9Q223;P02089;CON__Q3SX09;CON__P02070;P02104 [Hemoglobin subunit beta-1 ...]	219199000	147814000	1174850000	1628580000	7226500000	7335400000	199485000	332505000	1211810000	1832230000	63106600	121296000	343390000	352739000	112444700	131019200	26550600	8245370
A8R0W3 [ ...]	194170	194170	194170	194170	194170	194170	194170	194170	194170	194170	9619100	11048000	194170	194170	194170	194170	194170	194170
A8XY17;A2A4J8;Q9CQ80 [Vacuolar protein-sorting-associated protein 25 ...]	194170	194170	194170	194170	194170	194170	194170	194170	194170	194170	1038000	1081800	194170	194170	194170	194170	194170	194170
A9R9W0;A2CEL1;P11588;A2CEL0;L7MUC7;A2CEK9 [Major urinary protein 1 ...]	236514000	294171000	1457220000	1349540000	14701470	20836600	279788000	264213000	360515000	414078000	268593000	257301000	215299000	205975000	27419000	9891870	170191000	168933000
B1ARA3;P61255;B1ARA5 [60S ribosomal protein L26 ...]	582510	582510	582510	582510	13749000	5769540	987710	582510	1141370	582510	1856740	6149970	582510	582510	840460	582510	582510	582510
B1ARC0;B1ARB9;S4R1I6;Q8BTS0;Q61656 [Probable ATP-dependent RNA helicase DDX5 ...]	194170	194170	194170	194170	6544300	8283200	194170	194170	194170	194170	194170	194170	194170	194170	194170	194170	194170	194170
B1AT92;Q60631;B1AT95 [Growth factor receptor-bound protein 2 ...]	194170	388340	194170	1545470	7353600	11587500	194170	388340	194170	388340	194170	388340	194170	388340	194170	388340	194170	388340
B1AXP0;B1AXN9;E9PWV3;Q505N6;F6RQA2;F6Q8A4;P18653;P18654;F6UG16;B1AXN8;B2GVN8;A2CEE8;B1AXN5;B1B0X1;A0A338P701;G3UZI3;A2CEE6;A2CEE5;E9PUP0;A2CEE7;E9QK39;Q9WUT3;Q7TPS0 [Ribosomal protein S6 kinase;Ribosomal protein S6 k ...]	194170	388340	194170	388340	3417300	6538600	194170	388340	194170	388340	194170	388340	194170	388340	194170	388340	194170	388340
B1AXW5;B1AXW6;P35700;B1AXW4;B1AZS9;O08807 [Peroxiredoxin-1 ...]	582510	4380870	8042670	8791770	52661170	106593000	6302970	3318740	7172270	6990970	36292000	29151000	1452340	1448440	17310400	13013770	1161080	1123460
B1B1A8;Q6PDN3 [Myosin light chain kinase, smooth muscle;Myosin li ...]	1506700	1532870	194170	1137910	194170	388340	1743300	1868670	194170	388340	194170	388340	194170	388340	194170	1060710	194170	388340
B7FAV1;B7FAU9;Q8BTM8;F6XC15;Q8VHX6;F6Z2C0;J3JS91 [Filamin-A ...]	582510	582510	17592100	18544800	174623000	152543000	582510	2758820	13190200	4765940	3252140	582510	582510	582510	1784740	582510	582510	582510
B7ZCP7;B7ZCP6;E9Q806;B7ZCP4;Q8C166;V9GWY2;V9GX86;B7ZCP8;B7ZCP5;A3KGK7 [Copine-1 ...]	388340	582510	388340	2865740	9320200	10861570	388340	582510	388340	582510	388340	1757140	388340	582510	856400	582510	388340	582510
B7ZNJ1;A0A087WS56;B9EHT6;A0A087WSN6;Q3UHL6;A0A087WR50;P11276;Q4KL80;A0A087WSU6;A0A087WS99 [Fibronectin;Anastellin ...]	18445800	19693500	62849000	53666000	43736000	46694000	10751600	8312500	10160700	6178170	582510	1354940	2121940	3978800	582510	582510	582510	582510
B8JJM5;F6VQX8;B8JJN0;P04186;F6XQ00;B8JJM6;H3BK95;B8JJM3;F6W2T4 [Complement factor B;Complement factor B Ba fragmen ...]	9026400	8869600	15935100	17265900	25223100	25099900	4091370	4361470	2028040	1918040	1550740	1471140	582510	1219690	582510	582510	582510	582510
B8JK51;Q8K015 [Centromere protein O ...]	194170	194170	194170	194170	30729000	15858000	194170	194170	194170	194170	194170	194170	194170	194170	194170	194170	194170	194170
CON__A2A4G1;B1AQ77;Q61414;CON__Q99456 [Keratin, type I cytoskeletal 15 ...]	67175100	52161000	280500000	266590000	262024000	244773000	39930800	25394000	296216000	277236000	81034000	77544000	22210470	47479300	56551900	58583300	20625420	20970500
CON__ENSEMBL:ENSBTAP00000038253 [ ...]	251522000	280314000	397728000	406772000	231075000	243283000	194420000	202206000	346717000	348084000	152739600	195078000	228612900	220108800	45836170	44049200	176057800	174137700
CON__P00761 [ ...]	928184170	619319170	1009572000	1452813000	1595434170	1149465170	721934170	1056344170	1161124170	1192474170	934614170	674132170	1051404170	993974170	1128164170	1160707800	1504824170	1098885370
CON__P01966;A7M7S6;P06467 [ ...]	201297500	198341400	811588000	774455000	2835745000	2694214000	166911170	81054340	1053831000	1064498000	50960340	50235340	152144070	287922400	150948340	180428170	9714140	8735440
CON__P02533;Q61781 [Keratin, type I cytoskeletal 14 ...]	67175100	52161000	280500000	266590000	262024000	244773000	38176900	21172770	296216000	277236000	79455000	77514000	26103700	47479300	42001370	47986500	21050600	25964300
CON__P02538;CON__Q8VED5;Q8VED5;CON__Q14CN4-1 [ ...]	197814000	225580000	349293000	339199000	189137000	158369000	83082000	42815500	195292000	202887000	105318200	106232000	57099100	73048000	27491900	24681800	45532500	58154500
CON__P02768-1 [ ...]	358661000	316110000	472862000	464424000	597128000	867800000	100989100	100752200	18357300	3709940	7632380	16680000	32874340	40036600	3916270	2578940	4923470	5206370
CON__P02769 [ ...]	120871000	127399000	103840600	151622000	239978000	168116000	37388270	38221370	582510	582510	1282250	16174600	47609600	50953400	3489740	582510	7891370	8527170
CON__P04264 [ ...]	480640000	461510000	647420000	5.88E+08	406200000	412880000	293841000	308343000	463500000	465970000	312810000	363390000	488760000	488030000	69838000	95760000	418530000	398510000
CON__P05784;P05784 [Keratin, type I cytoskeletal 18 ...]	57799300	40701200	135261400	141518500	145955170	149566000	30572100	20725100	122527800	122683100	118560000	86726000	582510	30628700	75558000	74929000	5090940	8099890
CON__P07744;P07744 [Keratin, type II cytoskeletal 4 ...]	60360400	30635670	58975770	118718300	152125000	125467000	54982500	3813240	97787070	102719570	72096970	62621070	582510	31958170	3632240	3687140	582510	19749340
CON__P08727 [ ...]	85668000	59448000	178792000	167690000	277521000	265624000	49477000	34387170	154711000	129991400	146295000	110284000	22210470	47479300	96819000	93534000	24474600	24962100
CON__P08730-1;P08730 [Keratin, type I cytoskeletal 13 ...]	69549100	62864000	165139400	169371100	159118000	154418000	23018370	582510	129488900	123920170	59025000	51057000	14105970	47955300	10422200	23134500	14341170	15046500
CON__P08779;CON__Q9Z2K1;CON__Q3ZAW8;Q9Z2K1;Q9WTL4 [Keratin, type I cytoskeletal 16 ...]	67175100	52161000	280500000	266590000	262024000	244773000	38905800	21172770	296216000	281945000	79455000	77514000	25913900	51447200	42001370	47986500	26258800	27967800
CON__P13645;CON__Q7Z3Y7;CON__Q7Z3Z0;CON__Q7Z3Y8;CON__Q148H6;CON__Q2M2I5 [ ...]	223107000	194945000	480090000	481760000	207357000	215574000	120116000	102390000	334071000	331407000	135984000	141808000	151912000	141988000	42260600	34854800	90324000	105751000
CON__P13647 [ ...]	183111000	191893000	301361000	294842000	173245000	137023000	67801000	15760300	136429000	125234000	105654000	91238000	34759700	43750000	19151000	20588800	28785200	37305700
CON__P19001;P19001 [Keratin, type I cytoskeletal 19 ...]	85668000	59448000	178792000	167690000	277521000	265624000	49477000	39671000	154711000	133233100	146295000	110284000	22210470	47479300	99734000	95680000	24474600	24962100
CON__P19012 [ ...]	67175100	52161000	175239400	164950100	262024000	244773000	36923170	20061340	154711000	123920170	79455000	77514000	22210470	47479300	48353000	48214800	19966170	20970500
CON__P35527 [ ...]	376982000	300092000	519300000	424890000	237418000	225345000	303448000	138593000	333021000	481820000	302601000	276519000	394851000	377611000	83315700	78629200	549067000	369619000
CON__P35908 [ ...]	151940000	162030000	325960000	360799000	208270000	218190000	116051000	109131000	169540000	180100000	130459000	123909000	166933000	166429000	28932100	26641400	75379300	75300300
CON__P48668;CON__P04259 [ ...]	197814000	225580000	349293000	339199000	189137000	158369000	83082000	42815500	195292000	202887000	105318200	106232000	56424600	73048000	27491900	24681800	45532500	58154500
CON__P50446;P50446;Q3UV11;Q9Z331 [Keratin, type II cytoskeletal 6A;Keratin, type II ...]	61135800	40975100	64276800	127248000	103730000	61155000	59621400	16506400	123861000	129386800	82494000	75602900	6873270	34868800	4387690	3687140	11166600	35599600
CON__Q04695;CON__Q9QWL7;Q9QWL7;CON__Q61782;CON__P35900;CON__Q8N1A0;CON__Q9C075;CON__Q99PS0;Q99PS0 [Keratin, type I cytoskeletal 17 ...]	67175100	52161000	175239400	164950100	262024000	244773000	41658000	24436770	157284000	137790000	79455000	77514000	28969800	47479300	48695600	48520500	19966170	25964300
CON__Q6IFZ6;Q6IFZ6;CON__Q7Z794 [Keratin, type II cytoskeletal 1b ...]	154880800	151698340	238861000	255844500	83854340	94692870	20767770	582510	15550340	12413340	14342900	23279970	13285770	28838800	13352340	11000340	6113540	5723440
CON__Q6IME9;Q6IME9 [Keratin, type II cytoskeletal 72 ...]	27867970	1929040	5657940	71736170	4112040	1252180	15136340	5135940	13616870	11679170	7509140	13564340	582510	18241070	1337960	582510	582510	582510
CON__Q86YZ3 [ ...]	21730200	14116970	27093170	29361900	9179240	582510	582510	582510	5886940	5852540	4897140	4916940	6880470	7574770	582510	582510	2380440	2481640
CON__Q922U2;Q922U2 [Keratin, type II cytoskeletal 5 ...]	183111000	188555000	290661600	294842000	173245000	144867000	67801000	17428300	114529000	116728100	127377000	127775000	23385600	43952000	56684900	53628600	11333700	29078300
CON__Q9D312;Q9D312 [Keratin, type I cytoskeletal 20 ...]	19478000	19226330	15388870	14558070	79471170	79842170	582510	2242840	12193340	13464340	21051100	17894000	5117640	4957640	9454800	18157300	1572340	1555340
CON__Q9D646;CON__A2A5Y0;Q9D646;Q8K0Y2;Q61765;CON__O76011;CON__Q6NTB9;CON__Q14525;CON__O76009;CON__Q9UE12;CON__Q15323;CON__Q8IUT8;CON__O76014;CON__REFSEQ:XP_986630;Q61897 [Keratin, type I cuticular Ha4;Keratin, type I cuti ...]	194170	194170	194170	194170	194170	194170	1062900	2539700	194170	194170	194170	194170	194170	194170	194170	194170	194170	194170
CON__Q9DCV7;Q9DCV7;CON__Q3KNV1;CON__P08729;D3Z6N5;CON__Q9NSB2;CON__Q6ISB0;CON__Q6KB66-1;G5E846;A0A2R8W6R6;G3X981;P15331 [Keratin, type II cytoskeletal 7 ...]	63627700	42269000	67945200	123068000	119548000	74584000	61031300	23467900	109168500	114935100	129290000	103525000	2567940	33969000	66546000	67270000	5184900	21193670
CON__Q9NSB4;Q99M74 [Keratin, type II cuticular Hb2 ...]	388340	388340	62793170	388340	388340	388340	1811670	17254100	388340	388340	388340	388340	388340	388340	388340	388340	388340	388340
D3YTY9;A0A0R4J038;O08677;D3Z2B2 [Kininogen-1;Kininogen-1 heavy chain;Bradykinin;Kin ...]	44144700	42795400	114627000	115999000	167992000	171942000	52066000	32269100	27823600	21405500	9022170	582510	5065640	5000340	2285140	582510	582510	582510
D3YVB4;D3Z712;F8WJ41;P62245 [40S ribosomal protein S15a ...]	194170	388340	194170	388340	16469000	15675900	194170	388340	194170	388340	194170	388340	194170	388340	194170	388340	194170	388340
D3YWF6;Q7TQI3;D3Z7K0 [Ubiquitin thioesterase OTUB1 ...]	582510	582510	582510	582510	14635400	14903900	582510	582510	582510	582510	582510	582510	582510	582510	582510	582510	582510	582510
D3YWL1;D3YW33;P35276 [Ras-related protein Rab-3D ...]	194170	194170	2314500	194170	5799400	7244100	194170	194170	194170	194170	194170	194170	194170	194170	194170	194170	194170	194170
D3YX76;P15626 [Glutathione S-transferase Mu 2 ...]	73984170	75912170	63774340	65332340	52945170	57354170	93590170	92709170	73938340	75330340	422604170	255308340	35429340	33840340	316210170	320227300	54119340	53620340
D3YY36;Q9DBD0;F6W4D3 [Inhibitor of carbonic anhydrase ...]	54059470	71520200	71113300	8279500	5253640	6072240	30545340	47329340	582510	1591140	582510	582510	582510	15831340	582510	582510	582510	9759440
D3YYH3;D3YUE8;D3Z223;P15327 [Phosphoglycerate mutase;Bisphosphoglycerate mutase ...]	194170	194170	194170	194170	194170	4623800	194170	194170	3691000	3815100	194170	194170	194170	194170	194170	194170	194170	194170
D3Z1A9;D3Z313;Q9DCC5;P23198 [Chromobox protein homolog 3 ...]	194170	194170	2064200	2411000	194170	10252000	194170	194170	194170	194170	194170	194170	194170	194170	194170	194170	194170	194170
D3Z1H8;D3Z1H9;Q9JL62 [Glycolipid transfer protein ...]	194170	194170	194170	194170	194170	3112500	194170	194170	194170	194170	1743700	194170	194170	194170	194170	194170	194170	194170
D3Z1T4;D3Z1M1;D3YZX3;E9QKR0;P62880;H3BLF7;H3BKR2;P29387;P62874;E9PWM7;Q61011 [Guanine nucleotide-binding protein G(I)/G(S)/G(T) ...]	388340	388340	2180670	388340	12474100	20444300	388340	812450	388340	388340	388340	388340	388340	388340	388340	388340	388340	388340
D3Z1V4;P70296 [Phosphatidylethanolamine-binding protein 1;Hippoca ...]	194170	194170	194170	1594900	6755600	5961300	1147300	194170	194170	4041500	194170	194170	194170	194170	3551700	3454500	194170	194170
D3Z1Z8;D3Z5N2;P54227;P55821 [Stathmin;Stathmin-2 ...]	388340	194170	388340	194170	10742300	7367500	388340	194170	388340	194170	388340	194170	388340	194170	388340	194170	388340	194170
D3Z2H9;E9Q5J9 [ ...]	582510	582510	12821400	18567100	95100000	84834000	582510	582510	582510	1544240	582510	582510	582510	582510	582510	582510	582510	582510
D3Z2U2;D3Z637;D3Z125;E9PUA7;D3Z7X7;F8WHQ1;Q62393 [Tumor protein D52 ...]	194170	194170	194170	194170	7136200	7356200	194170	194170	194170	194170	194170	194170	194170	194170	194170	194170	194170	194170
D3Z4N2;F8WIP8;P10923 [Osteopontin ...]	194170	194170	4053200	194170	194170	194170	737460	194170	4835600	194170	1399600	194170	194170	1715700	194170	194170	1064800	1025500
D3Z6F5;Q03265;Q831A3 [ATP synthase subunit alpha;ATP synthase subunit al ...]	2912640	2543740	13905800	19089700	79428000	86654000	3935870	3583370	10840700	6715370	8318570	8570470	582510	696500	20672200	17664300	1177490	1271250
D3Z6I8;E9Q7Q3;A0A0R4J1P2;P21107;D3YVR0;A2AIM5;S4R2U0;G5E8R0;E9Q453;G5E8R2;G5E8R1;E9Q456;E9Q455;E9Q452;Q8BSH3;Q8BP43;E9Q450;E9Q448;CON__Q3SX28;B7ZNL3;A2AIM4;E9Q454;F8WID5;P58774;P58771 [Tropomyosin alpha-3 chain ...]	582510	582510	12821400	18567100	95100000	84834000	582510	582510	582510	1544240	582510	582510	582510	582510	3042540	582510	582510	582510
D3Z789;D3Z6Z0;Q78ZM0;O70492 [Sorting nexin-3 ...]	194170	194170	194170	194170	194170	194170	194170	194170	194170	194170	194170	194170	194170	194170	1377800	1504300	194170	194170
E9PUM5;E9Q8B6;E9Q8B5;Q61405 [ ...]	2872270	4561400	7505000	3505470	388340	388340	388340	388340	1476070	1593070	388340	388340	388340	388340	388340	388340	388340	388340
E9PUZ8;P08607 [C4b-binding protein ...]	469020	450140	1132400	1142600	194170	194170	476360	194170	194170	194170	194170	194170	194170	194170	194170	194170	194170	194170
E9PV24;CON__P02672 [Fibrinogen alpha chain;Fibrinopeptide A;Fibrinogen ...]	96649000	94761000	260003000	254859000	242188000	224672000	46387100	32865500	132682000	135075000	29244400	36710000	16609070	21810900	582510	582510	9079500	8557670
E9PWE9;P48025 [Tyrosine-protein kinase;Tyrosine-protein kinase SY ...]	388340	388340	388340	388340	9240400	8129000	388340	388340	388340	388340	388340	388340	388340	388340	388340	388340	388340	388340
E9PWU4;Q60994 [Adiponectin ...]	5542300	5371500	10056200	6658400	33159000	32415000	1523370	5513400	388340	388340	388340	388340	388340	853580	388340	388340	388340	388340
E9PYF1;Q8VCT3 [Aminopeptidase B ...]	582510	388340	582510	388340	22741400	11533300	582510	388340	582510	388340	2675740	2944570	582510	388340	582510	388340	582510	388340
E9PZ00;Q8BFQ1;K3W4L3;J3QPG5;Q61207 [Prosaposin ...]	582510	582510	7681270	7337170	12137000	8345970	2366290	1149640	582510	7250600	2878540	582510	582510	582510	582510	582510	582510	582510
E9PZC3;Q923D2;E9PZC4;A0A0U1RPU7 [Flavin reductase (NADPH) ...]	388340	194170	388340	194170	7916070	8982900	388340	194170	11327170	194170	388340	194170	388340	194170	388340	194170	388340	194170
E9PZF0;Q01768;Q5NC79 [Nucleoside diphosphate kinase;Nucleoside diphospha ...]	582510	2041640	14282340	11107470	74516000	84408000	1955740	1940040	582510	582510	6719570	2750940	582510	582510	582510	582510	582510	582510
E9PZW0;E9Q557 [Desmoplakin ...]	1399040	1553140	2401440	2821140	582510	582510	582510	1263400	4477410	3788570	582510	1251320	582510	2070540	582510	582510	582510	1109770
E9Q1Y9;CON__Q61726;Q9ERE2;P97861;Q6IMF0;CON__P78386;Q9Z2T6;CON__O43790;CON__Q6NT21;CON__P78385;CON__Q14533 [Keratin, type II cuticular Hb1;Keratin, type II cu ...]	33850340	26307340	50613340	44793340	69954340	28384340	39939200	3836800	89886340	95281340	66791340	57741340	582510	16928340	582510	582510	582510	19749340
E9Q1Z0 [ ...]	65390000	41767500	75205600	118718300	95063500	78216000	60011600	17428300	110187700	114804600	107298800	107748000	2786840	34586900	46666300	42262000	3847940	23008470
E9Q3E1;F6QPV9;J3QMK6 [Aldehyde dehydrogenase ...]	388340	194170	1236670	194170	388340	194170	388340	194170	388340	194170	388340	194170	388340	194170	4083270	3877600	388340	194170
E9Q3W4;Q9QXS1;A0A3B2W7J8;A0A2I3BRT4;Q8R0W0 [Plectin ...]	582510	582510	582510	582510	3898740	582510	582510	582510	582510	582510	2225350	1376670	582510	582510	1660520	1610960	582510	582510
E9Q3X0;Q9EQK5 [Major vault protein ...]	194170	388340	194170	388340	2245400	1918570	194170	388340	194170	388340	194170	1130230	194170	388340	194170	388340	194170	388340
E9Q3Z4;Q3TRM8;E9Q8S8;D6RFA3;P52792 [Hexokinase;Hexokinase-3 ...]	582510	582510	2310340	3953680	36558000	39156000	582510	582510	582510	1339790	582510	582510	582510	582510	582510	582510	582510	582510
E9Q499;F2Z405;Q5I2A0 [Serine protease inhibitor A3G ...]	38160170	41427000	83926170	81540000	69939170	69331000	41620750	40597000	11218170	11131000	15977170	9859500	388340	13958000	3229370	3153500	388340	194170
E9Q604;G5E8F1;E9Q5K8;Q3U1U4;P05555;A0A0R4J1B4 [Integrin alpha-M ...]	582510	582510	9795470	9989600	110885000	105549000	582510	582510	4190440	582510	582510	582510	582510	582510	582510	582510	582510	582510
E9Q616;A0A494BBD5 [ ...]	582510	582510	582510	582510	23096770	6247040	582510	582510	582510	582510	1488840	4050810	582510	582510	582510	582510	582510	582510
E9Q8I0;P06909;D6RGQ0;E9Q8H9;A0A0A6YWP4;A0A0A6YVP8 [Complement factor H ...]	17669600	22365400	18969500	18863400	23551100	18413800	10572100	11580900	7018400	4913370	1023880	582510	1817040	1743240	582510	582510	1195250	1250960
E9QAY6;A0A0U1RP81;E9Q800;Q8CAQ8 [MICOS complex subunit Mic60 ...]	194170	388340	194170	388340	194170	388340	194170	388340	194170	388340	194170	388340	194170	388340	736000	1322310	194170	388340
E9QK48;Q7TNG5 [Echinoderm microtubule-associated protein-like 2 ...]	194170	1573570	194170	388340	5848700	5860070	194170	388340	194170	388340	194170	388340	194170	388340	194170	388340	194170	388340
E9QN08;A0A0R4J1L2;Q91VK2;Q80T06;P57776;D3Z7N2;D3YY68;D3YUQ9;D3YZT9;F6ZFU0;A0A0R4J1E2 [Elongation factor 1-delta ...]	388340	388340	388340	1912270	388340	6844770	388340	388340	388340	388340	5211300	388340	388340	388340	388340	388340	388340	388340
F6QYF8;Q11011;E9Q039 [Puromycin-sensitive aminopeptidase ...]	388340	388340	388340	388340	13198500	10389100	388340	388340	388340	388340	388340	388340	388340	388340	388340	388340	388340	388340
F6TVP2;Q60710;E9PYG9 [Deoxynucleoside triphosphate triphosphohydrolase S ...]	582510	582510	582510	582510	52156000	49333000	582510	582510	582510	582510	582510	582510	582510	582510	582510	582510	582510	582510
F6UFG6;D3YYE1;D3Z7M9;O35381;Q9EST5;Q64G17 [Acidic leucine-rich nuclear phosphoprotein 32 fami ...]	388340	388340	2545370	2828070	3218670	5242170	388340	388340	2256370	388340	388340	1760070	388340	388340	388340	388340	388340	388340
F6W0I8;Q8K2J1;A0A0R4J0W4;Q8CI85 [Carbonic anhydrase 12 ...]	194170	194170	194170	194170	194170	194170	194170	194170	194170	194170	194170	194170	1489800	194170	194170	194170	1217400	1273500
F6W322;B8JK33;B8JK32;Q9D0E1;A0A3Q4EH91 [Heterogeneous nuclear ribonucleoprotein M ...]	388340	194170	1953970	194170	12624700	194170	388340	194170	388340	194170	388340	890080	388340	194170	388340	194170	388340	194170
F6XVM5;A0A338P776;Q9DB20 [ATP synthase subunit O, mitochondrial ...]	388340	388340	388340	388340	388340	6455270	388340	388340	388340	388340	388340	388340	388340	388340	3224700	3082130	388340	388340
F6YHE5 [ ...]	194170	194170	194170	194170	194170	6418000	1056100	194170	194170	194170	194170	194170	194170	194170	194170	194170	194170	194170
F6ZKZ3;Q9R112;H3BLH2 [Sulfide:quinone oxidoreductase, mitochondrial ...]	388340	194170	388340	194170	8543800	5202800	388340	194170	388340	194170	388340	194170	388340	194170	388340	194170	388340	194170
F6ZSB7;Q61753 [D-3-phosphoglycerate dehydrogenase ...]	194170	388340	194170	388340	3738600	3885370	194170	388340	194170	388340	194170	707850	194170	388340	194170	388340	194170	388340
F6ZTG3;E9Q197;Q9CPV4 [Glyoxalase domain-containing protein 4 ...]	194170	194170	194170	194170	194170	194170	194170	194170	194170	3478700	2333300	2140700	194170	194170	194170	194170	194170	194170
F7BP55;Q9WTP6 [Adenylate kinase 2, mitochondrial;Adenylate kinase ...]	388340	194170	388340	194170	6890170	6516000	388340	194170	652940	194170	388340	194170	388340	194170	388340	194170	388340	194170
F7C106;A0A0A6YVR0;Q9D881;P19536 [Cytochrome c oxidase subunit 5B, mitochondrial ...]	194170	194170	613510	194170	194170	194170	194170	194170	194170	194170	194170	1368900	194170	194170	194170	194170	194170	194170
F7CAZ6;A2AMW0;P47757;A0A0A0MQI9;F6YHZ8 [F-actin-capping protein subunit beta ...]	388340	388340	5901370	7160300	39565000	25031170	388340	388340	388340	388340	388340	388340	388340	388340	388340	388340	388340	388340
F8WGL3;P18760;A0A494B9A7 [Cofilin-1 ...]	9272740	582510	83228500	83322900	397247000	254444000	11596340	10645340	20137070	22050170	61400170	23777340	2500740	582510	11330340	12294340	4319040	4441640
F8WIR1;P18242;F6Y6L6;A0A1B0GT66 [Cathepsin D ...]	388340	582510	388340	582510	12483170	11424340	388340	1109520	388340	582510	1282770	1469840	388340	582510	4720570	4934040	388340	582510
F8WIT2;P14824 [Annexin;Annexin A6 ...]	582510	582510	582510	1565740	29463400	30456200	582510	582510	582510	582510	582510	582510	582510	582510	582510	582510	582510	582510
F8WIV2;Q60854;E9PYY0;E9Q3Y1;E9Q6X2;E9Q108;E9Q0P9;K7E6F1;E9PZQ9;E9Q4R2 [Serpin B6 ...]	388340	582510	388340	582510	388340	582510	388340	582510	388340	582510	388340	4948870	388340	582510	2834000	2822970	388340	582510
F8WJ05;Q61702 [Inter-alpha-trypsin inhibitor heavy chain H1 ...]	582510	1865440	8376700	5587370	18991470	17208870	3001670	1668140	582510	582510	582510	582510	582510	582510	582510	582510	582510	582510
G3UWN9;G3UXY0;G3UXZ5;P97371;G3X9K9 [Proteasome activator complex subunit 1 ...]	388340	388340	388340	3230670	25734700	15738170	388340	388340	388340	388340	388340	388340	388340	388340	388340	388340	388340	388340
G3UX26;Q60930;D3YZT5;A0A286YCR8;D3YUN8 [Voltage-dependent anion-selective channel protein ...]	582510	388340	5286170	5245200	16521570	12450170	582510	388340	582510	388340	1370800	388340	582510	388340	582510	1056590	582510	388340
G3UY11;G5E8J2;B7ZW98;E9QNT8;G8JL84;D3YTV8;D3Z5M4;Q0VGY9;A0A0R4J1N7;Q02357;D6RJ51;F7D1P5 [Ankyrin-1 ...]	388340	582510	388340	582510	388340	4631940	388340	582510	3028900	1857440	388340	582510	388340	582510	388340	582510	388340	582510
G3UY13;E9Q6I2;Q61730 [Interleukin-1 receptor accessory protein ...]	194170	194170	6580800	6820300	194170	194170	194170	194170	194170	194170	194170	194170	194170	194170	194170	194170	194170	194170
G3UY29;E9Q3P9;F8WGS1;P62492;P46638;G3UZD3;G3UZL4;D3YYB3 [Ras-related protein Rab-11A;Ras-related protein Ra ...]	582510	582510	4466370	3827570	41169100	21629970	582510	582510	582510	1984540	8887770	3194040	582510	582510	1772440	7159970	582510	582510
G3UYI4;G3UYL3;Q8BG32 [26S proteasome non-ATPase regulatory subunit 11 ...]	194170	194170	194170	194170	194170	194170	194170	1168300	194170	194170	4492000	4872900	194170	194170	3672500	3694300	194170	770480
G3UYL6;G3UX05;Q99L20;G3UYJ7 [ ...]	194170	194170	194170	194170	194170	194170	194170	194170	194170	194170	194170	194170	194170	194170	1820400	1985000	194170	194170
G3UYV7;P62858 [40S ribosomal protein S28 ...]	194170	194170	1066600	1207400	2448000	3451700	769140	803390	976910	194170	3558300	3537300	194170	194170	1639500	1961400	194170	194170
G3X8T9;Q91WP6;H7BWY0;Q6P4P1 [Serine protease inhibitor A3N ...]	38354340	41427000	85671870	81540000	82982400	69331000	41335340	40597000	11412340	11131000	16171340	9859500	582510	13958000	3423540	3153500	582510	194170
G3X920;Q9DBR3 [Armadillo repeat-containing protein 8 ...]	194170	194170	194170	194170	20010000	20162000	194170	194170	194170	194170	194170	194170	194170	194170	194170	194170	194170	194170
G3X977;Q61703;Q3UEG7;CON__Q9TRI1 [Inter-alpha-trypsin inhibitor heavy chain H2 ...]	2058040	388340	2731440	3512270	41449170	17206170	2927470	388340	582510	388340	582510	388340	582510	388340	582510	388340	582510	388340
G3X9D9;P48997 [Involucrin ...]	582510	2204340	4142540	582510	582510	582510	2332520	2238000	6134440	3925670	38456800	35769600	582510	582510	29236900	35162800	1801480	1625250
G3X9T8;G3X8Q5;E9PZD8;Q61147;G3UXG1;G3UWP5;G3UZ53 [Ceruloplasmin ...]	18219700	17375800	37401600	31825900	101537000	109147000	17982200	10617900	4858440	4360740	1484840	1287550	582510	582510	582510	582510	1172860	582510
G3X9V0;P97372 [Proteasome activator complex subunit 2 ...]	388340	194170	388340	194170	14881600	4003600	388340	194170	388340	194170	664420	477000	388340	194170	388340	194170	388340	194170
G5DDB7;Q8R3B1 [Phosphoinositide phospholipase C;1-phosphatidylino ...]	194170	194170	194170	194170	194170	194170	194170	194170	194170	194170	194170	194170	194170	194170	892030	760720	194170	194170
G5E839;P80315 [T-complex protein 1 subunit delta ...]	582510	582510	582510	582510	8711540	13274170	582510	582510	582510	582510	3839070	1201080	582510	582510	582510	582510	582510	582510
G5E850;P56395;E0CY88 [Cytochrome b5 ...]	388340	388340	388340	388340	388340	17819700	388340	388340	388340	388340	388340	388340	388340	388340	4533230	4512170	388340	388340
G5E902;Q8VEM8 [Phosphate carrier protein, mitochondrial ...]	582510	582510	582510	582510	5054240	4354440	582510	582510	3812370	4019970	582510	582510	582510	582510	582510	1332850	582510	582510
H3BJP2;H3BK43;H3BLJ9;H3BJL6;H3BKH6;Q9R0P3 [S-formylglutathione hydrolase ...]	194170	194170	194170	194170	4252000	194170	194170	194170	194170	194170	1531800	194170	194170	194170	194170	997440	194170	194170
H3BJQ7;P99029;A0A494BAZ4;G3UZJ4 [Peroxiredoxin-5, mitochondrial ...]	582510	4386970	61295300	59952300	376511000	382614000	2057340	2343140	22725970	20363170	18692970	18854270	582510	1819740	6624840	6290940	582510	1931240
H3BK03;P52430;H3BLB8 [Serum paraoxonase/arylesterase 1 ...]	194170	3368440	4142700	582510	7801200	13965670	194170	582510	194170	582510	194170	582510	194170	582510	194170	582510	194170	582510
H3BKI8;A0A286YDM3;H3BK96;H3BKD0;B2M1R6;P61979;A0A286YCM2;H3BLL4;A0A286YEC4;A0A286YE41;H3BJ43;H3BJS9;Q8BT23;A0A286YDH1 [Heterogeneous nuclear ribonucleoprotein K ...]	582510	582510	7246170	2928040	51402900	51672000	979530	582510	582510	582510	1790440	2031840	582510	582510	1537940	1556040	582510	582510
H3BKL7;E9Q797;P49183;D3YXC7 [Deoxyribonuclease-1 ...]	388340	996400	19143700	9775200	388340	194170	388340	194170	3185670	3015100	1969870	1672000	388340	194170	388340	194170	388340	194170
H7BWY6;Q00724;A0A494B9P3;A0A494B9T2 [Retinol-binding protein 4 ...]	1878270	1966300	1767070	1353800	6137800	194170	1266770	1337400	388340	591780	388340	194170	388340	194170	388340	194170	388340	194170
H7BX22;P34022 [Ran-specific GTPase-activating protein ...]	194170	194170	999040	194170	3245300	3237700	194170	194170	194170	1258400	963020	194170	194170	194170	194170	194170	194170	194170
H7C7A0 [ ...]	388340	582510	388340	582510	388340	582510	7740600	10831800	2152670	2829640	388340	582510	388340	582510	388340	582510	388340	582510
I7HLV2;Q6ZWV3;P86048;A0A1B0GXC3 [60S ribosomal protein L10;60S ribosomal protein L1 ...]	194170	582510	194170	582510	6561000	8595270	194170	582510	194170	1534140	194170	582510	194170	582510	194170	582510	194170	582510
I7HPY0;Q91VW3 [SH3 domain-binding glutamic acid-rich-like protein ...]	194170	2444700	12870000	13578000	37444000	22954000	5395100	3988200	12829000	11427000	10305000	9173900	1392100	1064000	2658900	194170	1773200	2133300
J3QP71;K3W4Q8;P18572 [Basigin ...]	582510	194170	582510	194170	2842440	2102100	582510	194170	1333920	893860	582510	194170	582510	194170	582510	194170	582510	194170
K3W4R2;Q6URW6;A0A140LHX1 [Myosin-14 ...]	582510	582510	582510	3966740	32103400	33791600	582510	582510	582510	582510	2114350	582510	582510	582510	582510	582510	582510	582510
K9J7B2;Q64435;D3YZE6;D3Z7G0;D3YZ96;G3UZC9;B2RT14;E9PXN7;D3Z748;Q62452;P70691;Q63886;D6RH94;D3YWN0;D3YUP6;Q8BJL9;Q91WH2;Q8VCN3;Q8K169;Q3UEP4;P17717 [UDP-glucuronosyltransferase 1-6;UDP-glucuronosyltr ...]	582510	582510	5606170	4537670	582510	582510	1140380	582510	582510	582510	2933040	3023840	582510	582510	8364870	5220370	582510	582510
M0QWU8;P31786 [Acyl-CoA-binding protein ...]	194170	194170	6616800	6019800	20211000	194170	2032600	2630000	194170	194170	194170	194170	194170	194170	7449100	7895200	194170	194170
O08439 [ ...]	194170	194170	194170	194170	194170	194170	1213400	1244200	194170	194170	194170	194170	194170	194170	194170	194170	194170	194170
O08553 [Dihydropyrimidinase-related protein 2 ...]	194170	388340	194170	388340	5579600	6576470	194170	871250	194170	388340	194170	388340	194170	388340	194170	388340	194170	388340
O08692 [Neutrophilic granule protein ...]	4807670	582510	220539000	230865000	912790000	1049360000	41422500	38212100	301349000	277757000	62068000	41923170	8279270	5907240	582510	582510	10844600	10683170
O08997 [Copper transport protein ATOX1 ...]	388340	1279100	10150070	8972700	11813170	194170	1290870	194170	388340	194170	388340	194170	388340	194170	388340	194170	388340	194170
O09043 [Napsin-A ...]	6944500	6866700	33833000	35416000	4679200	5209000	6375500	6296300	8397700	7933300	18220000	17902000	8713400	8728800	194170	194170	19638000	20299000
O09114 [Prostaglandin-H2 D-isomerase ...]	194170	194170	4703800	4921100	194170	194170	194170	194170	2995200	3019600	194170	194170	194170	2141800	194170	194170	194170	3616900
O09131;A0A494BAB1;A0A494B9X6;A0A494BAY2;A0A494BB82;Q8K2Q2 [Glutathione S-transferase omega-1 ...]	2702240	3322440	2736140	3751970	25980170	24145170	3480970	4771700	582510	4478850	28757400	23376200	582510	582510	14800400	12868070	582510	1503740
O35639;Q3TET3;A0A0G2JDV9;A0A0G2JGL7 [Annexin A3 ...]	582510	2050540	14116100	14008000	96138000	88260000	582510	1424740	1137700	582510	5089800	3087610	582510	582510	5119700	5690600	582510	582510
O35744;F6RU51 [Chitinase-like protein 3 ...]	582510	582510	116257000	122058000	678930000	674940000	582510	2891040	19277300	22597200	8259400	5962270	582510	582510	582510	582510	582510	582510
O35945 [Aldehyde dehydrogenase, cytosolic 1 ...]	388340	194170	388340	194170	16084170	194170	388340	194170	388340	194170	388340	2603600	388340	194170	1687470	2697200	388340	194170
O55022 [Membrane-associated progesterone receptor componen ...]	388340	194170	388340	194170	388340	194170	388340	194170	388340	194170	2286270	194170	388340	194170	741080	2335600	388340	194170
O55142 [60S ribosomal protein L35a ...]	582510	388340	582510	388340	4926040	3036070	582510	388340	582510	388340	5472570	1569070	582510	388340	1856340	388340	582510	388340
O55234;Q8BTY5 [Proteasome subunit beta type-5 ...]	194170	582510	194170	582510	194170	582510	194170	582510	1019800	1387150	1624700	2707350	194170	582510	522810	1242900	194170	582510
O70138 [Neutrophil collagenase ...]	388340	194170	388340	194170	12230600	5690900	388340	194170	388340	194170	388340	194170	388340	194170	388340	194170	388340	194170
O70145;A0A087WPH0 [Neutrophil cytosol factor 2 ...]	582510	582510	13560600	2713340	25630500	42927200	582510	582510	582510	582510	582510	582510	582510	582510	582510	582510	582510	582510
O70435;E0CZ34;F8WH02;E0CYL6;E0CX62 [Proteasome subunit alpha type-3 ...]	582510	582510	582510	2338740	18751100	18618400	582510	582510	582510	582510	582510	582510	582510	582510	582510	582510	582510	582510
O70456 [14-3-3 protein sigma ...]	6771800	582510	46404300	13852400	202283000	39290170	23032600	29684600	46824000	46270000	161436000	158779000	7408570	6830870	52158000	36001000	7878370	15115800
O70475;D3YXP9 [UDP-glucose 6-dehydrogenase ...]	1670840	928450	1175360	1137320	582510	582510	2434340	2434090	2045140	1848440	12617970	11878570	1429640	1398040	11520780	11553100	1529610	1422050
O88342;A0A0J9YU05 [WD repeat-containing protein 1 ...]	582510	582510	15486300	12341800	73372000	62221000	2737140	2610940	10139900	12587100	12354000	14038400	582510	582510	5429640	5123340	1733840	1757440
O88536 [Formyl peptide receptor 2 ...]	194170	194170	194170	194170	9324200	8439000	194170	194170	194170	194170	194170	194170	194170	194170	194170	194170	194170	194170
O88569;A0A0N4SUM2 [Heterogeneous nuclear ribonucleoproteins A2/B1 ...]	882100	582510	4308140	14552700	83548000	77562000	582510	582510	1497240	954190	582510	582510	582510	582510	2828870	1515340	582510	582510
O88844;A0A087WPT4;A0A087WRS9;D3YVY3;A0A087WRM4;A0A0U1RP68;D6RIL6;P54071 [Isocitrate dehydrogenase [NADP] cytoplasmic ...]	582510	5121240	8269600	7376200	40369800	40090900	7779970	582510	8273870	8916900	37235100	19657900	3195740	2779540	24337700	41055400	2625340	3850040
O89020 [Afamin ...]	11338600	10384500	16673500	19848500	32337340	35770170	2951440	2539040	582510	582510	582510	582510	582510	582510	582510	582510	582510	582510
O89053;G3UYK8;A0A0U1RPY8;D3YW57;G3UX53;D3YXM2 [Coronin-1A;Coronin ...]	582510	582510	83808000	77667000	254815000	302379000	5167770	2877540	25213500	12259900	1600440	582510	582510	582510	582510	582510	582510	582510
P00329 [Alcohol dehydrogenase 1 ...]	3601040	3424040	5385840	5552540	582510	582510	2417540	2722340	1505640	2420140	49692000	54081000	582510	582510	26857170	34795000	1687440	1653040
P00405 [Cytochrome c oxidase subunit 2 ...]	194170	388340	1939400	388340	8090100	12738300	194170	388340	194170	1827170	194170	388340	194170	388340	1802600	388340	194170	388340
P00920;A0A0A6YX78 [Carbonic anhydrase 2 ...]	582510	582510	15978070	11247770	86761000	145331000	2503440	2535140	44158770	54946170	1752940	582510	582510	2390440	582510	582510	582510	582510
P01027;H3BKW9;H3BL60;CON__Q2UVX4 [Complement C3;Complement C3 beta chain;C3-beta-c;C ...]	88876000	86824000	164821000	138950000	201377000	211428000	84401000	98016000	93348000	89409000	28156000	27801000	30207300	35568500	1880310	3682300	16433100	15873000
P01029 [Complement C4-B;Complement C4 beta chain;Complemen ...]	2302460	3377010	9995000	11096700	27371200	26970500	3837100	3929500	582510	582510	582510	582510	582510	582510	582510	582510	582510	582510
P01132;A0A0G2JDT8;A0A0G2JF92;A0A0G2JFB8 [Pro-epidermal growth factor;Epidermal growth facto ...]	36585400	34100100	218465000	166953000	582510	582510	6850700	6463140	30990100	29626100	9802600	40858100	4933670	3136540	1203210	582510	5009470	1681540
P01837 [Ig kappa chain C region ...]	14240170	12676170	14519170	388340	388340	3727070	8936570	10099470	388340	388340	388340	388340	388340	388340	388340	388340	388340	388340
P01887 [Beta-2-microglobulin ...]	388340	388340	5036870	5240570	38082000	34330600	3242370	3249370	3265070	388340	1244770	1344170	1115450	388340	388340	702700	1036130	388340
P01897;P01899;P01896 [H-2 class I histocompatibility antigen, L-D alpha ...]	582510	582510	10769300	8601220	50112100	42989500	582510	582510	582510	582510	582510	582510	582510	582510	582510	582510	582510	582510
P01898;A0A494B9G2;A0A0B4J1G3;A0A494B9G8;E9PWT4;E9QJR9;P79568;E9PX63;Q8HWB2;A0A494BA33;A0A494BAT0;Q3TH01;O19441;A7VMS6;E9Q0G4;G3UXE9;P01895;P14430;P14428;P14429;P14426;P01900;P03991;P04223;P01901 [H-2 class I histocompatibility antigen, Q10 alpha ...]	7005370	5210370	13753400	12446400	52055700	43386200	3685040	4522940	582510	582510	582510	582510	582510	582510	582510	582510	582510	582510
P03953 [Complement factor D ...]	15244340	24756970	87076800	56379300	582510	582510	582510	582510	582510	582510	8101140	582510	582510	582510	582510	582510	582510	582510
P04104 [Keratin, type II cytoskeletal 1 ...]	92499800	67671340	134941000	199614500	141801500	156618000	41704170	26497340	60175170	53585170	50539800	44402140	52772070	68484800	582510	20479340	56494340	55969340
P04117;A0A0A6YW05;A0A0A6YXB9;A0A0A6YXI2;P24526;O08716 [Fatty acid-binding protein, adipocyte ...]	11856570	15439300	54713000	53931000	23395670	23964070	28568900	21669070	24721300	18477770	154287000	179735000	582510	6994640	27513300	26836600	7320270	3175040
P04919 [Band 3 anion transport protein ...]	582510	582510	1339250	1580940	107573000	101169000	582510	582510	24984500	22659200	582510	582510	582510	582510	582510	582510	582510	582510
P05064;A6ZI44;Q9CPQ9;A6ZI46;D3Z510;A0A0U1RPN8;D3YWI1;D3YV98;A0A0U1RPT5;A6ZI47 [Fructose-bisphosphate aldolase A;Fructose-bisphosp ...]	4752370	5677170	32903400	30240200	103233000	117983000	12332400	12110500	19125800	16741470	21609400	20203100	582510	582510	11565700	10297200	582510	986100
P05201 [Aspartate aminotransferase, cytoplasmic ...]	388340	40590170	388340	388340	388340	388340	24200170	388340	388340	388340	388340	1871970	388340	388340	1398570	388340	388340	388340
P05202 [Aspartate aminotransferase, mitochondrial ...]	582510	1288900	5062820	4685270	13940600	14709470	582510	582510	582510	582510	3154980	2385740	582510	582510	3120440	5349530	582510	582510
P05366;A0A1B0GQV5;P05367 [Serum amyloid A-1 protein;Serum amyloid A-2 protei ...]	1046650	821510	388340	1416370	388340	3241770	388340	388340	1549870	1593370	388340	388340	388340	388340	388340	388340	388340	388340
P06684 [Complement C5;Complement C5 beta chain;Complement ...]	3242670	3347570	4962070	7902900	582510	582510	582510	582510	582510	582510	582510	582510	582510	582510	582510	582510	582510	582510
P06728 [Apolipoprotein A-IV ...]	46392000	47813000	64337000	51514000	34349000	36318900	19365600	25509000	14030200	10050200	2549740	4297570	1876540	2980370	2857270	1459340	582510	1064660
P06745;A0A0U1RQ72;A0A0U1RP97;CON__Q3ZBD7;A0A0U1RQ18 [Glucose-6-phosphate isomerase ...]	582510	582510	35182900	34886600	219644000	246761000	3868740	582510	4350270	7117500	14068800	8998100	582510	582510	582510	582510	582510	582510
P06801;Q3TQP6 [NADP-dependent malic enzyme;Malic enzyme ...]	864650	582510	582510	1343100	582510	582510	1085020	1146430	1143860	582510	12033100	12523200	582510	812900	2968860	1339430	582510	582510
P07309 [Transthyretin ...]	187331000	153771000	261212000	250173000	324729000	261622000	91701000	93191000	76255700	73359500	27317370	6882540	21299370	21600370	1940240	1815640	4854470	2591940
P07310;A0A0J9YKD4 [Creatine kinase M-type ...]	388340	194170	388340	194170	388340	194170	6420400	4206100	4430770	4475600	388340	194170	388340	194170	388340	194170	388340	194170
P07356;B0V2N8;B0V2N7;B0V2N5 [Annexin A2;Annexin ...]	4269570	4285970	39443600	36581700	179414000	176778000	2644640	2231240	8280470	5565940	14482870	11863700	582510	1474640	6971670	6357270	1987340	1970140
P07361 [Alpha-1-acid glycoprotein 2 ...]	388340	3762470	3951070	4520370	15662000	12188100	388340	388340	388340	388340	388340	388340	388340	388340	388340	388340	388340	388340
P07515 [ ...]	2226400	2401800	1060800	194170	194170	194170	9278500	9775500	194170	2162200	194170	194170	194170	194170	194170	194170	194170	194170
P07724 [Serum albumin ...]	5313400000	5.23E+09	6394800000	4937200000	7473300000	8212400000	3194400000	3503400000	1320840000	1202910000	1075610000	887860000	970690000	980770000	273408000	304714000	650140000	571110000
P07901;B7ZC50;A2A6A2;B7ZC49;REV__Q8BL66 [Heat shock protein HSP 90-alpha ...]	1640140	3242170	9000600	8183900	73964000	76046000	582510	2998410	3876440	3660240	10155000	8235970	582510	582510	4174500	5102370	582510	582510
P08030;A0A1D5RLR6 [Adenine phosphoribosyltransferase ...]	582510	388340	3554640	388340	15769470	29841000	582510	388340	582510	388340	1712040	388340	582510	388340	582510	388340	582510	388340
P08032 [Spectrin alpha chain, erythrocytic 1 ...]	582510	582510	582510	582510	8960500	3169040	582510	582510	5576900	5874400	582510	582510	582510	582510	582510	582510	582510	582510
P08071;A0A0G2JDN0;A0A0G2JGN1;A0A0G2JFM6;A0A0G2JEA3 [Lactotransferrin ...]	582510	582510	65698000	64808000	496430000	447300000	5907270	2420540	51167000	48870000	8562770	8013570	1606640	1448840	582510	582510	1250650	1108180
P08074;F6YNX9 [Carbonyl reductase [NADPH] 2 ...]	388340	582510	388340	582510	35071800	58424300	388340	582510	388340	582510	388340	1986140	388340	582510	2436870	1025010	388340	582510
P08113;F7C312 [Endoplasmin ...]	2055940	2243540	9934500	2837040	52162500	57025000	582510	582510	582510	582510	6234870	5348940	582510	582510	7116100	6222070	582510	582510
P08226;A0A1B0GX15;G3UWN5;G3UZM8 [Apolipoprotein E ...]	22405700	18387500	29574600	23848300	8423070	7704170	14408700	16219600	3659570	1106080	3013970	3204470	1993340	1968840	1051410	1046610	1330700	582510
P08228 [Superoxide dismutase [Cu-Zn] ...]	6984570	7325640	10269640	582510	86347170	84370000	9403970	582510	17759340	29421700	34626900	43272000	582510	582510	19674770	22001070	582510	1928640
P08249;A0A0G2JF23;A0A0G2JGY4 [Malate dehydrogenase, mitochondrial ...]	582510	1383400	12293900	14385800	73836000	60169000	582510	582510	5914240	6301270	4737970	4734070	582510	582510	4759370	6074300	582510	582510
P08752;A0A0A6YWA9;B2RSH2;A2AE32;P20612;P18872;Q3V3I2;P50149;A2A610;A2AE31;Q8C040;D3Z2M7;Q8BHK8;F6QPU5;Z4YKV1;Q66L47;Q8CGK7;P63094;Q6R0H7 [Guanine nucleotide-binding protein G(i) subunit al ...]	582510	582510	20790900	19851500	71082000	65791000	582510	582510	3180740	2739440	582510	840190	582510	582510	582510	582510	582510	582510
P08905;P17897 [Lysozyme C-2;Lysozyme C-1 ...]	582510	582510	61088200	32097370	281264000	276724000	582510	3536440	13581870	19757100	6690140	4320240	582510	582510	582510	582510	582510	582510
P09103;E9Q8G8 [Protein disulfide-isomerase ...]	582510	582510	1281130	2844640	35223600	41119800	582510	582510	3700970	4601500	2404240	4661170	582510	582510	3030940	1467140	582510	582510
P09405 [Nucleolin ...]	582510	582510	582510	1599540	20694500	28796500	1172280	1175200	1431410	1204580	4642100	4183900	582510	582510	1940640	2050440	582510	582510
P09411;S4R2M7;P09041 [Phosphoglycerate kinase 1;Phosphoglycerate kinase ...]	582510	582510	23270000	25351900	179362000	199098000	582510	582510	582510	2192740	3525970	2132440	582510	582510	2640340	2160340	582510	582510
P09528;A0A494BA92;A0A494B9D4;A0A494BAP3 [Ferritin heavy chain;Ferritin heavy chain, N-termi ...]	582510	582510	15041300	7306470	164480000	145856000	582510	582510	582510	582510	582510	582510	582510	582510	582510	582510	582510	582510
P09813 [Apolipoprotein A-II;Proapolipoprotein A-II ...]	194170	194170	194170	4478900	194170	194170	6676700	6124400	194170	5662400	194170	194170	1762900	2200600	194170	194170	194170	194170
P0DM31 [ ...]	1289770	194170	388340	194170	388340	194170	4084970	1880900	388340	194170	388340	194170	388340	194170	388340	194170	388340	194170
P0DOV2;A0A087WRA4;D0QMC3 [Myeloid cell nuclear differentiation antigen-like ...]	194170	388340	194170	388340	5393200	8893500	194170	388340	194170	388340	194170	388340	194170	388340	194170	388340	194170	388340
P0DP28;P0DP27;P0DP26;Q3UKW2;A0A3Q4EHJ0;A0A1Y7VK66;Q9D6P8;P20801 [Calmodulin-like protein 3 ...]	582510	582510	582510	582510	53872300	43200800	582510	582510	582510	582510	19549400	16024770	582510	1855240	582510	582510	582510	582510
P10107;A0A494BBD8 [Annexin A1 ...]	582510	582510	99090000	83107000	452940000	433060000	8949170	8416370	34654300	26918200	10245300	10357970	582510	582510	582510	1322290	582510	582510
P10126;D3Z3I8;D3YZ68;P62631 [Elongation factor 1-alpha 1;Elongation factor 1-al ...]	31722100	31943700	73638000	58737000	298021000	273135000	42660300	31536570	50991000	53558000	142432000	125049000	5777940	5824340	67587700	66631700	13690370	14235170
P10605 [Cathepsin B;Cathepsin B light chain;Cathepsin B he ...]	194170	194170	194170	194170	7542000	7735600	194170	194170	194170	194170	194170	194170	194170	194170	194170	194170	194170	194170
P10639 [Thioredoxin ...]	4196770	582510	18771170	15700340	51337000	53790900	9282870	10800340	19455170	16529340	25713170	22758340	388340	582510	3221270	2659240	388340	582510
P10810 [Monocyte differentiation antigen CD14 ...]	582510	582510	1802540	582510	57437900	53420000	582510	582510	582510	582510	582510	582510	582510	582510	582510	582510	582510	582510
P11031 [Activated RNA polymerase II transcriptional coacti ...]	194170	194170	194170	194170	2321500	2673600	194170	194170	194170	194170	194170	194170	194170	194170	194170	194170	194170	194170
P11247;F7DC05;F8WGZ9;A0A0A0MQL9 [Myeloperoxidase;Myeloperoxidase light chain;Myelop ...]	582510	582510	68281000	69234000	3.60E+08	353812000	4269100	3050070	23498900	30844300	5173700	1778240	582510	582510	582510	582510	582510	582510
P11499;E9PX27;E9Q3D6;D3Z1R1;E9Q0C3 [Heat shock protein HSP 90-beta ...]	3113570	4903200	13477500	11059300	79584000	82175000	582510	2998410	3876440	3660240	41170600	17538000	582510	582510	10706600	16679500	582510	582510
P11589 [Major urinary protein 2 ...]	376215000	434020000	2070680000	2095870000	50776300	56369000	279788000	264213000	360515000	414078000	268593000	257301000	215299000	205975000	43324000	30791700	170191000	168933000
P11679;CON__Q9H552 [Keratin, type II cytoskeletal 8 ...]	183111000	188904000	293671000	294842000	194719000	151714000	61031300	26160300	114006000	119818000	129302000	129791000	15490100	42274000	77445000	68966000	10745900	28149400
P11680 [Properdin ...]	1228400	2065070	1970900	1949770	3366200	2223870	1181600	388340	1095500	1166810	194170	388340	194170	388340	194170	388340	194170	388340
P11983 [T-complex protein 1 subunit alpha ...]	582510	388340	582510	388340	18640670	4909470	582510	388340	582510	388340	2570940	2033570	582510	388340	2129940	1633470	582510	388340
P12246 [Serum amyloid P-component ...]	194170	1218900	3617000	194170	194170	194170	194170	194170	194170	194170	194170	194170	194170	194170	194170	194170	194170	194170
P12787 [Cytochrome c oxidase subunit 5A, mitochondrial ...]	194170	194170	194170	194170	9956300	10242000	194170	194170	194170	194170	194170	194170	194170	194170	194170	194170	194170	194170
P12970 [60S ribosomal protein L7a ...]	582510	388340	582510	388340	17003870	6985170	582510	388340	2551840	388340	1764540	1689870	582510	388340	1752880	388340	582510	388340
P13020;A0A0J9YUQ8;CON__Q3SX14;A6PWS5;A0A0J9YUJ8 [Gelsolin ...]	41449000	43384000	74997000	73544000	151086000	138764000	36894800	40372700	34439300	33650500	58437000	73879000	8500170	13187600	14016500	20311200	6691840	9192900
P13634;D3YYQ4 [Carbonic anhydrase 1 ...]	582510	582510	582510	582510	15143600	5312040	582510	582510	18383900	8274770	582510	582510	582510	582510	582510	582510	582510	582510
P14069 [Protein S100-A6 ...]	57968170	74867000	41527340	103739000	141908340	136934170	116268170	123263000	114471170	115537000	512994170	604950000	60981170	26149170	199591900	238154000	60796170	63404000
P14115 [60S ribosomal protein L27a ...]	194170	194170	2584400	2853700	194170	194170	194170	194170	1393000	1183600	7516000	6886200	194170	194170	6473400	5763600	194170	194170
P14131 [40S ribosomal protein S16 ...]	582510	582510	2627100	3430840	20464570	34134900	582510	582510	582510	582510	2579240	2555640	582510	582510	1393240	582510	582510	582510
P14148;F6XI62 [60S ribosomal protein L7 ...]	582510	194170	582510	194170	14719340	7783300	582510	194170	582510	194170	1291400	194170	582510	194170	5618770	194170	582510	194170
P14152 [Malate dehydrogenase, cytoplasmic ...]	582510	582510	3099940	582510	26786770	44065000	3383970	2983140	3371740	3569940	582510	6629270	582510	582510	2036040	1609740	582510	582510
P14206;A0A1L1SRW0;A0A1L1SUK3 [40S ribosomal protein SA ...]	388340	582510	388340	582510	4100570	14851000	388340	582510	388340	582510	1679570	1829940	388340	582510	388340	582510	388340	582510
P14211 [Calreticulin ...]	582510	1739340	582510	4513940	33978870	49548800	582510	582510	16387770	1566840	582510	582510	582510	582510	582510	582510	582510	582510
P14602;D3YZ06 [Heat shock protein beta-1 ...]	582510	194170	582510	194170	582510	194170	1214880	194170	582510	194170	4583000	1094400	582510	194170	5303870	1122700	582510	194170
P14685;F7B7L8 [26S proteasome non-ATPase regulatory subunit 3 ...]	582510	582510	582510	582510	7618470	6646970	582510	582510	582510	582510	1019150	1075650	582510	582510	582510	582510	582510	582510
P14733;A0A0R4J0Q5;P21619 [Lamin-B1 ...]	582510	582510	4615270	4119670	25607600	20261300	968940	582510	1221840	582510	582510	582510	582510	582510	582510	582510	582510	582510
P15864;P43277;I7HFT9;Q07133 [Histone H1.2;Histone H1.3 ...]	9404470	16560500	410317000	394345000	1168310000	1181350000	32864600	29740400	212785000	226552000	63204000	55578000	2266440	2354140	7347500	7884000	1442240	1557140
P15947;A0A0U1RPN5;P15945;P00757;Q61759;P15946 [Kallikrein-1 ...]	10735270	5989340	83936000	83926000	582510	582510	7048870	7159970	60709500	18979400	11640550	15382870	1872840	10255940	1486940	1349150	24207370	18641340
P16015 [Carbonic anhydrase 3 ...]	4635970	3027540	11024300	7610570	8311340	9312740	18333900	13001900	2534840	3440540	1995240	1859340	582510	582510	4785040	4250240	582510	582510
P16045 [Galectin-1 ...]	4552070	4092770	6579070	4564070	46723800	37535000	4016170	2041140	582510	582510	582510	582510	582510	582510	582510	582510	582510	582510
P16125;A0A0N4SVV8;D3Z7F0 [L-lactate dehydrogenase B chain;L-lactate dehydrog ...]	3332670	2909630	6698900	9024500	2680640	582510	582510	3906970	1607040	582510	50738000	50397000	582510	582510	22068100	20291800	1223450	582510
P17156 [Heat shock-related 70 kDa protein 2 ...]	5138040	4730940	18779600	17767100	96260000	108817000	12058340	3935940	3472240	3820140	18072870	19434700	1573840	582510	16841340	15148340	2311140	582510
P17182;Q6PHC1;B1ARR7;B0QZL1;A0A0N4SUI6;B1ARR6;Q5SX61;Q5SX60;D3YVD3;D3Z2S4;J3QPZ9;Q5SX59;D3Z6E4;A0A0N4SUX5;P17183 [Alpha-enolase ...]	582510	1663740	36027300	32550300	152629000	206285000	8594540	582510	23145200	21280400	15349170	7215770	582510	582510	582510	582510	582510	582510
P17563;Q63836;G3UYY2;A0A0R4J135;D6RHN2 [Selenium-binding protein 1;Selenium-binding protei ...]	194170	582510	194170	582510	5634700	7433670	194170	582510	194170	1210450	194170	582510	194170	582510	194170	582510	194170	582510
P17742;A0A1L1SST0;V9GXC1;V9GX31 [Peptidyl-prolyl cis-trans isomerase A;Peptidyl-pro ...]	6972270	3961640	55063000	40237000	175195000	109809170	3380140	4431940	2512240	582510	26731800	25947600	582510	582510	5181140	4524540	582510	582510
P17751;H7BXC3 [Triosephosphate isomerase ...]	1448440	2289870	10131200	10181500	58111000	49834000	2400440	1975540	27370300	10020970	30730600	27027270	582510	582510	8864770	8858800	582510	2221440
P19221;H7BX99;CON__P00735 [Prothrombin;Activation peptide fragment 1;Activati ...]	16045800	17272200	23096400	22842700	8281940	8892140	10263400	4214070	8426200	8092900	1945740	582510	582510	582510	582510	582510	2966640	1224990
P19783 [Cytochrome c oxidase subunit 4 isoform 1, mitochon ...]	388340	388340	1925470	3608900	21106700	18044200	388340	388340	388340	388340	388340	388340	388340	388340	7077900	2983070	388340	388340
P20029 [78 kDa glucose-regulated protein ...]	582510	582510	2484940	3848570	59343000	40253200	13494870	582510	582510	582510	582510	582510	582510	582510	3167970	1812500	582510	582510
P20065 [Thymosin beta-4;Hematopoietic system regulatory pe ...]	4560040	4313440	96100000	96452000	137949000	135244000	9056540	582510	62556500	37170970	55457000	49563000	582510	1866940	9873840	9839840	582510	582510
P20152;A0A0A6YWC8;A2AKJ2;P31001;D3YZ35;A0A0R4J036;P46660;P08551;P08553 [Vimentin ...]	42112870	37788170	75864000	66154100	287477000	255806000	47824400	11505000	107222800	112004500	92107170	81607170	582510	18939170	9540040	582510	1949440	19749340
P20918;CON__P06868 [Plasminogen;Plasmin heavy chain A;Activation pepti ...]	29008100	30752700	59657000	57117000	67415000	69880000	12051800	18579500	12349100	16479000	4989100	2105600	4077140	4244070	582510	582510	582510	582510
P21550 [Beta-enolase ...]	388340	1469570	9252470	6370470	79073170	161767000	1316270	388340	388340	388340	388340	388340	388340	388340	388340	388340	388340	388340
P21614;A0A0G2JGM6 [Vitamin D-binding protein ...]	68922000	59136000	99805000	88566000	148282000	151772000	35381300	38211000	16238700	12577800	4207670	5513070	3400470	3613070	3087880	582510	2834570	3847150
P21981;G3UXE8 [Protein-glutamine gamma-glutamyltransferase 2 ...]	582510	388340	582510	388340	29451800	18928700	582510	388340	582510	388340	582510	388340	582510	388340	582510	388340	582510	388340
P22599 [Alpha-1-antitrypsin 1-2 ...]	618612000	653412000	800410000	850740000	1187780000	850630000	378811700	388925000	167969800	158811170	142544000	135752170	130637000	145560000	35614600	36662200	81240170	85536770
P23530 [ ...]	388340	194170	388340	194170	388340	194170	2965700	975520	849940	618620	388340	194170	388340	194170	388340	194170	388340	194170
P23953;D3Z5G7;A0A1D5RM42;Q8VCT4;E9PYP1;Q8VCC2 [Carboxylesterase 1C ...]	74632000	77612000	76362000	108349000	202252000	207652000	37859500	37513600	23328300	20500600	11705300	8931040	7833340	10216770	1703940	3847470	6140270	6261170
P24270;A2AL20 [Catalase ...]	194170	194170	194170	194170	194170	5174300	194170	194170	1800800	194170	194170	194170	194170	194170	194170	194170	194170	194170
P24369 [Peptidyl-prolyl cis-trans isomerase B ...]	194170	194170	194170	194170	6995500	6161100	194170	194170	194170	194170	2793100	194170	194170	194170	2867400	2468000	194170	194170
P24472;A0A1L1SS61 [Glutathione S-transferase A4 ...]	15637300	21536300	19485500	18514600	9384540	17827970	25653500	24144800	37263000	37780300	148652000	148060000	11318800	11125800	114136000	114224000	15896300	15442300
P24527 [Leukotriene A-4 hydrolase ...]	582510	582510	16328000	23111300	113942000	103117000	1325580	1273820	4018230	905140	2781170	3594720	582510	582510	582510	582510	582510	582510
P25322 [G1/S-specific cyclin-D1 ...]	194170	194170	737750	999180	194170	194170	194170	194170	194170	194170	194170	194170	194170	194170	194170	194170	194170	194170
P25444;D3YVC1;D3YWJ3 [40S ribosomal protein S2 ...]	388340	388340	388340	388340	8422470	15819100	388340	388340	388340	388340	2105470	388340	388340	388340	388340	388340	388340	388340
P26039;A2AIM2;E9PUM4;A0A1L1SQ51;Q8CDM9;Q71LX4;F6SX70;A0A1L1SRI1;F6S1V7;A0A1L1SQP9 [Talin-1 ...]	582510	582510	11050500	9818900	58285000	61342000	582510	582510	7422500	8506000	2168480	1930920	582510	582510	582510	582510	582510	582510
P26040 [Ezrin ...]	582510	582510	11089000	19905100	184440000	188560000	582510	1145990	2303540	4048070	14885900	8008100	582510	582510	5904670	1164640	582510	582510
P26041;Q7TSG6 [Moesin ...]	582510	582510	16808800	17281100	184440000	188560000	582510	3642740	1612940	1533640	582510	582510	582510	582510	582510	582510	582510	582510
P26262 [Plasma kallikrein;Plasma kallikrein heavy chain;Pl ...]	4696600	2404200	3200840	2724370	9342040	7822070	582510	388340	582510	388340	582510	388340	582510	388340	582510	388340	582510	388340
P26350;A0A087WP98;A0A087WPN6;A0A087WQN2 [Prothymosin alpha;Prothymosin alpha, N-terminally ...]	388340	388340	388340	388340	16772200	9497270	1308470	1356770	388340	388340	16955300	3504770	388340	388340	388340	388340	388340	388340
P26443 [Glutamate dehydrogenase 1, mitochondrial ...]	388340	582510	1359070	1387010	4741770	8160370	388340	582510	2350700	1522340	971280	1224010	388340	582510	979210	1257640	388340	582510
P26516 [26S proteasome non-ATPase regulatory subunit 7 ...]	194170	388340	194170	388340	6016700	9667600	194170	388340	194170	388340	194170	388340	194170	388340	194170	388340	194170	388340
P27005 [Protein S100-A8 ...]	388340	388340	29334170	27782170	1691094170	1726356000	388340	388340	8560970	388340	388340	388340	388340	388340	388340	388340	388340	388340
P27048;P63163;A0A0G2JGN4 [Small nuclear ribonucleoprotein-associated protein ...]	388340	388340	388340	388340	15680900	15918800	388340	388340	388340	388340	388340	388340	388340	388340	388340	388340	388340	388340
P27773;F6Q404 [Protein disulfide-isomerase A3 ...]	1283890	582510	7941270	8456900	55137000	44858000	582510	1131650	3485340	582510	1513810	1264370	582510	582510	3597170	3786870	582510	582510
P28293 [Cathepsin G ...]	582510	388340	9743170	5538970	48462900	43514300	582510	768290	582510	3005170	582510	388340	582510	388340	582510	388340	582510	388340
P28650;J3QN31 [Adenylosuccinate synthetase isozyme 1 ...]	388340	194170	388340	194170	8925770	8004700	388340	194170	1290370	194170	388340	194170	388340	194170	388340	194170	388340	194170
P28665;P28666;A0A0N4SVU1;CON__ENSEMBL:ENSBTAP00000024146 [Murinoglobulin-1 ...]	28645300	21179400	55813000	50068000	161661000	133399000	28416300	23432600	8962600	2768640	1626040	1544940	5692170	6632970	582510	582510	582510	2337440
P28867;Q1MX41;Q1MX43;Q1MX40;Q1MX42;F8WGT6;Q02111 [Protein kinase C delta type;Protein kinase C delta ...]	388340	194170	1277070	194170	5153300	2438300	388340	194170	388340	194170	388340	194170	388340	194170	388340	194170	388340	194170
P29351 [Tyrosine-protein phosphatase non-receptor type 6 ...]	582510	582510	5882370	2240940	68399000	56091500	582510	582510	582510	1485340	582510	582510	582510	582510	582510	582510	582510	582510
P29595 [NEDD8 ...]	388340	388340	388340	388340	13011700	11594600	388340	388340	388340	388340	388340	388340	388340	388340	388340	388340	388340	388340
P29699;A0A338P703;A0A338P7G1;A0A338P7H5;A0A338P692;A0A338P6Y6;CON__P12763 [Alpha-2-HS-glycoprotein ...]	43688600	20795500	164654000	136488000	10638340	28825170	24593690	21548170	10253860	17854340	9384740	9706540	2370740	582510	582510	582510	582510	582510
P29788 [Vitronectin ...]	22079000	22629100	19363570	13310470	16728470	10434340	7652000	7072300	4091940	2042040	4431970	4353370	1824940	582510	582510	582510	582510	582510
P30115;Q6P8Q0;P13745;A0A087WQI6;D3Z6A6;D3YZV3;P10648 [Glutathione S-transferase A3;Glutathione S-transfe ...]	4752740	5819770	6118140	5273070	582510	7776970	6885340	6726670	9318440	8987070	40955770	41908200	5233840	4623670	39713600	35374500	6516440	6625670
P30355;A0A0J9YV38;A0A0J9YUC8 [Arachidonate 5-lipoxygenase-activating protein ...]	194170	388340	3774500	388340	25396000	21003170	194170	388340	194170	2241670	194170	388340	194170	388340	194170	388340	194170	388340
P30416 [Peptidyl-prolyl cis-trans isomerase FKBP4;Peptidyl ...]	194170	388340	194170	388340	194170	388340	194170	388340	194170	388340	1145900	1162880	194170	388340	484670	643520	194170	388340
P30681;A0A1B0GQX9 [High mobility group protein B2 ...]	582510	582510	50503000	30758800	203998000	150047000	582510	582510	582510	582510	582510	582510	582510	582510	582510	582510	582510	582510
P31725 [Protein S100-A9 ...]	32571340	34552340	1187779000	1241462000	3833026000	3633840000	64917000	45704000	271892000	321329000	49052000	31714900	5172570	3093240	4596440	4670240	5292570	5742570
P32020 [Non-specific lipid-transfer protein ...]	194170	194170	194170	1267500	194170	194170	194170	194170	194170	194170	1306800	1115900	194170	194170	194170	1184000	194170	194170
P32261;A0A0A6YWH7;CON__P41361;A0A0A6YXS8;A0A0A6YX49;A0A0A6YX70 [Antithrombin-III ...]	23423600	21074100	46015000	47794000	83959000	38765000	22547670	28841170	11156370	11129470	3720170	7742270	4508840	5980470	2777240	3923670	4222570	3164240
P32848 [Parvalbumin alpha ...]	388340	388340	388340	388340	388340	388340	1511370	2790600	2600170	1843170	388340	388340	388340	388340	388340	388340	388340	388340
P33267;A0A0U1RPL9 [Cytochrome P450 2F2 ...]	194170	194170	194170	194170	3105300	4975300	194170	194170	194170	194170	194170	194170	194170	194170	194170	194170	194170	194170
P34928 [Apolipoprotein C-I;Truncated apolipoprotein C-I ...]	388340	388340	16173170	16873170	388340	10630170	388340	388340	4047670	3795670	388340	388340	388340	388340	388340	388340	388340	388340
P35282;A0A1W2P6Z4 [Ras-related protein Rab-21 ...]	582510	194170	582510	194170	18624900	8312500	582510	194170	582510	1949600	582510	1182900	582510	194170	582510	194170	582510	194170
P35564 [Calnexin ...]	582510	582510	582510	582510	23230700	11675670	582510	582510	882530	821330	582510	582510	582510	582510	582510	582510	582510	582510
P35979 [60S ribosomal protein L12 ...]	582510	194170	2901940	194170	10250840	194170	969710	194170	582510	194170	5541970	194170	582510	194170	2037040	1605400	582510	194170
P39654 [Arachidonate 15-lipoxygenase ...]	194170	582510	194170	582510	5530200	20861600	194170	582510	194170	582510	194170	582510	194170	582510	194170	582510	194170	582510
P40124;B1ARS0;D3YTR7;A0A286YCS6;Q9CYT6 [Adenylyl cyclase-associated protein 1 ...]	582510	582510	25289500	6308840	116113000	87599000	3680570	1875040	3607530	8276200	12302300	9782570	1087580	984290	2432740	2245540	1260330	582510
P40142;A0A286YE28;E0CY51 [Transketolase ...]	3145370	4612400	92154000	96963000	370791000	356455000	11429100	11366400	32978900	32604300	19635200	16865800	582510	582510	15573600	7924830	582510	1910440
P41105 [60S ribosomal protein L28 ...]	194170	194170	194170	194170	194170	194170	194170	194170	194170	194170	2667700	3037100	194170	194170	194170	734700	194170	194170
P41245 [Matrix metalloproteinase-9 ...]	582510	582510	5729070	5717570	40440200	41753200	582510	582510	1243200	582510	582510	582510	582510	582510	582510	582510	582510	582510
P42932;H3BL49;H3BJB6;H3BKR8;H3BLL1;H3BKG2 [T-complex protein 1 subunit theta ...]	582510	582510	582510	1406340	16804500	17511400	1294230	1362290	2881470	1619540	8394700	5684600	582510	582510	582510	1286090	582510	582510
P43274 [Histone H1.4 ...]	6997040	14398370	348618000	342362000	1100977000	1144990000	32864600	29740400	212785000	226552000	63204000	55578000	2266440	2354140	5944500	5847570	1442240	1557140
P43275 [Histone H1.1 ...]	582510	8073040	218595200	206914100	523147000	583259000	12917340	11045340	58177800	59826500	26304340	19805050	582510	582510	3029070	582510	582510	582510
P43276 [Histone H1.5 ...]	1357220	1524540	38453100	38285700	323287000	361500000	11085370	9768170	79643170	91351170	20081600	17691370	582510	582510	1088170	998420	582510	582510
P45376;D3YVJ7 [Aldose reductase ...]	15945700	15800900	19316700	18276700	25004370	24338370	21323100	14084300	17268900	16715600	169690000	142932000	1919240	4304270	52413700	73171700	4119740	3933640
P45377;P21300 [Aldose reductase-related protein 2;Aldose reductas ...]	2586710	1321870	582510	582510	582510	582510	582510	4358670	2316540	2378740	35661600	26109600	582510	582510	4043940	11466300	2061240	2097040
P46412;A0A1C7ZMZ5;A0A1C7ZMZ7 [Glutathione peroxidase 3 ...]	194170	194170	6772000	4761200	194170	194170	194170	194170	194170	194170	194170	194170	194170	194170	194170	194170	194170	194170
P46467;Q8VEJ9;Q8BPY9 [Vacuolar protein sorting-associated protein 4B;Vac ...]	194170	194170	194170	194170	3430700	2771300	194170	194170	194170	194170	194170	194170	194170	194170	194170	194170	194170	194170
P47739;B1ATI6 [Aldehyde dehydrogenase, dimeric NADP-preferring ...]	582510	388340	582510	388340	582510	388340	582510	388340	582510	388340	12198570	2267870	582510	388340	9581750	2519770	582510	388340
P47791 [Glutathione reductase, mitochondrial ...]	582510	582510	16449300	18950500	87041000	92850000	582510	582510	3086040	7944800	1103390	2174960	582510	582510	582510	582510	582510	582510
P47911;A0A0J9YU32 [60S ribosomal protein L6 ...]	582510	582510	3285140	3055140	41177000	35304600	2064140	582510	582510	3399070	11238400	9875300	582510	582510	7924700	6098370	582510	582510
P47962;D3YYV8 [60S ribosomal protein L5 ...]	388340	582510	388340	582510	4610170	4382440	388340	582510	388340	582510	388340	3222940	388340	582510	749040	929990	388340	582510
P47963 [60S ribosomal protein L13 ...]	194170	194170	194170	194170	6959200	7800400	194170	194170	194170	194170	194170	194170	194170	194170	194170	194170	194170	194170
P48036;A0A0G2JGQ0 [Annexin A5 ...]	3213880	3474220	8272170	7540500	70483000	56797000	582510	582510	1799840	2817440	3359840	1824240	582510	582510	1814620	582510	790210	582510
P48678;D3YUF7 [Prelamin-A/C;Lamin-A/C ...]	582510	582510	582510	582510	3266640	582510	582510	582510	582510	582510	2504650	2588440	582510	582510	4531000	4555300	582510	582510
P48999;E9QA93;E9Q6H6;A0A0N4SW45 [Arachidonate 5-lipoxygenase ...]	582510	582510	1800880	1288590	15764300	17344700	582510	582510	879850	582510	582510	582510	582510	582510	582510	582510	582510	582510
P49182 [Heparin cofactor 2 ...]	194170	1629140	1228700	7002840	194170	582510	194170	582510	194170	582510	194170	582510	194170	582510	194170	582510	194170	582510
P49290 [Eosinophil peroxidase;Eosinophil peroxidase light ...]	582510	582510	19636500	19398900	115211000	105818000	582510	582510	582510	582510	582510	582510	582510	582510	582510	582510	582510	582510
P49710;E9Q4E5 [Hematopoietic lineage cell-specific protein ...]	582510	582510	2107740	1966640	29021500	29111800	582510	582510	582510	582510	582510	582510	582510	582510	582510	582510	582510	582510
P50247;A2ALT5 [Adenosylhomocysteinase ...]	1172520	876660	582510	1565240	20164600	20145100	1266170	1277150	1566640	1398240	2308210	2194810	582510	582510	1460120	1562390	582510	582510
P50396;D6RI86 [Rab GDP dissociation inhibitor alpha ...]	582510	388340	6404470	2836370	17551970	12269170	582510	388340	582510	2972670	5065210	3697320	582510	388340	1764740	388340	582510	388340
P50516;D3Z1B9;D3YWH3;D3YZ23 [V-type proton ATPase catalytic subunit A ...]	582510	582510	1657740	1502740	29791700	30175500	582510	582510	582510	582510	582510	582510	582510	582510	582510	582510	582510	582510
P50543 [Protein S100-A11 ...]	388340	194170	5186400	194170	6165470	5041900	388340	194170	388340	194170	388340	194170	388340	194170	388340	5671300	388340	194170
P50580 [Proliferation-associated protein 2G4 ...]	194170	388340	194170	388340	2522600	2878270	194170	388340	194170	388340	194170	1053620	194170	388340	194170	388340	194170	388340
P51150;A0A0N4SVR6;A0A0N4SVG9 [Ras-related protein Rab-7a ...]	582510	582510	10734400	8912700	58909000	52333600	582510	582510	582510	1759880	1794340	1215690	582510	582510	582510	582510	582510	582510
P51437 [Cathelin-related antimicrobial peptide ...]	194170	194170	16453000	15912000	61731000	61572000	194170	1790200	2298300	42092000	1905900	1875700	194170	194170	194170	194170	194170	194170
P51881;P48962;Q3V132 [ADP/ATP translocase 2;ADP/ATP translocase 2, N-ter ...]	582510	2130740	11602200	12467600	66186000	67067000	1539440	1398340	1922140	1095800	8174570	8098770	582510	582510	7885770	7326770	582510	582510
P51885;CON__Q05443 [Lumican ...]	2196870	1898970	388340	5352800	5752270	388340	1494570	1384470	388340	388340	388340	388340	388340	388340	388340	388340	388340	388340
P52480;A0A1L1SU37;A0A1L1SQV8;A0A1L1SUV0;A0A1L1SSN6;A0A1L1STV8;A0A1L1ST52;A0A1L1SVH2;E9Q509;G3X925;P53657 [Pyruvate kinase PKM ...]	14713970	4951640	83860000	68340000	360634000	352776000	16919570	18393500	33287200	22386800	109192000	99024000	2803940	2764540	17433470	21884700	5013770	3263840
P53810;F8WGG5;J3QQ30;J3QPW1 [Phosphatidylinositol transfer protein alpha isofor ...]	194170	194170	194170	194170	2358800	6137300	194170	194170	194170	194170	194170	194170	194170	194170	194170	194170	194170	194170
P53994;G3UXQ7;G3V022 [Ras-related protein Rab-2A ...]	388340	194170	388340	194170	10426300	6337000	388340	194170	388340	194170	388340	194170	388340	194170	388340	194170	388340	194170
P56480;Q831A5 [ATP synthase subunit beta, mitochondrial ...]	4485370	4512270	18407300	17928500	68641000	65822000	582510	582510	582510	582510	4879170	5575100	582510	582510	12298300	11291400	582510	582510
P57096 [Prostate stem cell antigen ...]	4965900	5156200	9879100	11595000	19692000	17278000	2467800	194170	194170	194170	10476000	10027000	194170	194170	7393800	194170	194170	194170
P58252;G3UXK8;G3UZ34;A2AH85;O08810 [Elongation factor 2 ...]	8551600	8727570	16301800	12642700	94537000	79836000	10279400	10351500	8807670	16385600	37900000	32756400	582510	1417840	14267900	15788900	3631840	3754750
P59999;Q3TX55;E9PWA7 [Actin-related protein 2/3 complex subunit 4 ...]	582510	582510	38895170	12187170	45338340	108967170	582510	582510	3299440	582510	582510	582510	582510	582510	1541640	1541540	582510	582510
P60335 [Poly(rC)-binding protein 1 ...]	388340	388340	388340	388340	9764900	9256600	1538910	1357330	1773670	1277970	2875870	3955600	388340	388340	1402170	1401570	388340	388340
P60766 [Cell division control protein 42 homolog ...]	1010720	388340	8459870	8550470	17222170	20752200	2181770	2207570	9768300	5015470	2171970	2193870	388340	388340	388340	748290	388340	388340
P60843;Q8BTU6;P10630;E9Q561;A0A338P6X5 [Eukaryotic initiation factor 4A-I ...]	1939040	2078440	4139640	6053170	27144200	24288600	1404340	1360270	2909870	3443670	7266400	7271500	582510	916130	5039740	6666870	582510	582510
P60867 [40S ribosomal protein S20 ...]	388340	582510	388340	2913340	388340	11580340	388340	582510	388340	1465340	3240570	3331040	388340	582510	2743400	2811170	388340	582510
P61027 [Ras-related protein Rab-10 ...]	2324270	2170070	11160170	11096170	48471170	53176170	2298470	2332970	3754300	2578570	8110500	388340	388340	388340	6692300	3983870	388340	388340
P61161 [Actin-related protein 2 ...]	388340	582510	388340	582510	80723000	78045700	388340	582510	388340	582510	388340	582510	388340	582510	388340	935970	388340	582510
P61358;A2A4Q0 [60S ribosomal protein L27 ...]	582510	582510	2741840	1760640	16782270	18911570	2003340	1561640	582510	582510	4738740	6556670	582510	582510	3024440	2977540	582510	582510
P61982 [14-3-3 protein gamma;14-3-3 protein gamma, N-termi ...]	582510	582510	39484270	4759440	194694600	32459870	23630300	25533900	33866500	17614340	67864070	73194360	2839540	6830870	582510	582510	6347340	6334340
P62082 [40S ribosomal protein S7 ...]	194170	388340	194170	388340	8428700	7800470	194170	388340	194170	388340	194170	1510270	194170	388340	194170	388340	194170	388340
P62137;A0A0J9YUU8;A0A0G2JFF1;P63087;P62141 [Serine/threonine-protein phosphatase PP1-alpha cat ...]	388340	194170	388340	1979600	10612000	7161900	388340	194170	388340	194170	388340	194170	388340	194170	388340	194170	388340	194170
P62242 [40S ribosomal protein S8 ...]	582510	582510	1537140	1669340	24943300	9307540	582510	582510	2213540	582510	2294520	2095240	582510	582510	2917640	2996940	582510	582510
P62259;F6WA09;D6REF3 [14-3-3 protein epsilon ...]	582510	582510	36760500	582510	199015000	42376170	20376270	22350170	33074600	19380270	62433800	71010300	2839540	6830870	1780840	582510	6347340	6334340
P62264;D3YVF4;D3Z7I1 [40S ribosomal protein S14 ...]	582510	388340	1609840	1425070	7206740	388340	1789940	1728270	2046040	388340	6420770	5587600	582510	388340	3334770	4200600	759940	388340
P62315 [Small nuclear ribonucleoprotein Sm D1 ...]	194170	194170	194170	194170	8404200	9899400	194170	194170	194170	194170	194170	194170	194170	194170	1425600	194170	194170	194170
P62320 [Small nuclear ribonucleoprotein Sm D3 ...]	388340	388340	388340	388340	21695800	27880000	388340	388340	388340	388340	388340	388340	388340	388340	388340	388340	388340	388340
P62702;V9GWY0 [40S ribosomal protein S4, X isoform ...]	388340	582510	388340	582510	2565570	2734440	388340	582510	388340	582510	4521100	6394200	388340	582510	388340	582510	388340	582510
P62737;P63268;A0A494B9T3;D3YZY0;D3Z2K3;A0A0U1RQ96 [Actin, aortic smooth muscle;Actin, gamma-enteric s ...]	79753000	93638000	824610000	796670000	2531040000	2388520000	231787000	201508000	413979000	310455000	302581000	320408000	44796000	18362970	163138000	164004000	64568700	64857700
P62748;A0A1Y7VMK3 [Hippocalcin-like protein 1 ...]	388340	388340	388340	388340	11620000	12264800	388340	388340	388340	388340	388340	388340	388340	388340	388340	388340	388340	388340
P62751 [60S ribosomal protein L23a ...]	194170	194170	194170	194170	6387900	4312800	194170	194170	194170	194170	194170	194170	194170	194170	194170	194170	194170	194170
P62754 [40S ribosomal protein S6 ...]	194170	388340	194170	388340	9471500	12823300	194170	1705570	2154300	2504470	194170	388340	194170	388340	2282900	2313470	194170	388340
P62806 [Histone H4 ...]	43794170	56617100	1369430000	1356730000	5206900000	5161200000	96218200	98879200	321166000	355555000	152311000	172707000	12297970	13031570	78146700	109940000	27839200	25424500
P62814 [V-type proton ATPase subunit B, brain isoform ...]	194170	194170	194170	194170	3154500	3364200	194170	194170	194170	194170	194170	194170	194170	194170	194170	194170	194170	194170
P62827;Q14AA6;Q61820 [GTP-binding nuclear protein Ran ...]	1384920	1174780	5023640	5346870	60562000	30141000	2056440	1968670	3319240	2874570	5608140	388340	582510	661250	582510	388340	582510	388340
P62830;A2A6F8 [60S ribosomal protein L23 ...]	194170	194170	194170	194170	6634800	194170	194170	194170	194170	194170	194170	917180	194170	194170	194170	194170	194170	194170
P62855 [40S ribosomal protein S26 ...]	388340	194170	388340	194170	10970000	3796600	1529870	194170	388340	194170	388340	194170	388340	194170	3516970	194170	388340	194170
P62908;D3YV43;A0A140LI77 [40S ribosomal protein S3 ...]	582510	582510	2806840	582510	38168400	31726870	1736540	582510	12400370	582510	13852900	6105970	582510	582510	4287470	6945700	582510	582510
P62918 [60S ribosomal protein L8 ...]	388340	388340	1917570	2868400	8446870	16174200	2215370	3121910	2803800	1440170	6575100	4917670	388340	388340	4405900	3849600	388340	388340
P62962;Q5SX49;CON__P02584 [Profilin-1;Profilin ...]	582510	582510	9818600	12613500	283292000	277645000	8659140	582510	4528470	1817340	24145710	1322270	582510	582510	4191340	582510	582510	582510
P63028;D3YU75 [Translationally-controlled tumor protein ...]	388340	388340	388340	2965870	28456000	27917400	388340	388340	388340	388340	388340	388340	388340	388340	388340	388340	388340	388340
P63038 [60 kDa heat shock protein, mitochondrial ...]	582510	582510	582510	582510	5745640	4324740	582510	1083350	2671270	2478950	3465770	2164640	582510	582510	2737860	2397940	582510	582510
P63101;A0A2I3BQ03;D3YXN6;D3YXF4;D3YW45 [14-3-3 protein zeta/delta ...]	582510	582510	57662600	28054700	248307000	93661000	24036500	24821200	46362000	42251000	104904000	77893200	2839540	6830870	4798970	24284900	6347340	6334340
P63260;P60710;E9Q5F4;G3UZ07;E9Q1F2;G3UYG0;E9Q606;A0A1D5RM20;B1ATY1;Q8BFZ3;F8WGM8;E9Q2D1;F6WX90;V9GXQ2 [Actin, cytoplasmic 2;Actin, cytoplasmic 2, N-termi ...]	98616000	109372000	831360000	810360000	2728660000	2541340000	231787000	206382000	468690000	392318000	302883000	327755000	44796000	26865900	180879000	181222000	68380500	69034600
P63325;A0A338P731;Q3UW83;A0A338P7K4;A0A3B2W864 [40S ribosomal protein S10 ...]	582510	388340	582510	388340	21661000	17307100	582510	388340	582510	388340	1455940	388340	582510	388340	1566740	1359970	582510	388340
P63328 [Serine/threonine-protein phosphatase 2B catalytic ...]	194170	194170	194170	194170	4891300	4831500	194170	194170	194170	194170	194170	194170	194170	194170	194170	194170	194170	194170
P68040 [Guanine nucleotide-binding protein subunit beta-2- ...]	582510	582510	582510	582510	6999140	7241040	582510	582510	582510	582510	3175340	2917140	582510	582510	3906190	2634040	582510	582510
P68134;P68033 [Actin, alpha skeletal muscle;Actin, alpha cardiac ...]	79753000	93638000	824610000	796670000	2531040000	2388520000	231787000	201508000	413979000	310455000	302581000	320408000	44796000	18362970	163138000	164004000	64568700	64857700
P68254 [14-3-3 protein theta ...]	582510	582510	36400510	1026870	192996400	24181340	20376270	22350170	32000060	18028490	66036710	71069570	2839540	6830870	582510	582510	6347340	6334340
P68369;P05214 [Tubulin alpha-1A chain;Tubulin alpha-3 chain ...]	8380770	10458400	34498200	34894000	187674000	192148000	11429570	13307900	16718600	19565670	33712600	17621200	1212740	1261110	582510	18795700	1447340	1407040
P68373;P05213;A0A2R8VHF3;Q9JJZ2;Q3UX10 [Tubulin alpha-1C chain;Tubulin alpha-1B chain;Tubu ...]	8380770	10458400	34498200	34894000	187674000	192148000	11429570	13307900	16718600	19565670	33712600	17621200	1212740	1261110	582510	18795700	1447340	1407040
P68510 [14-3-3 protein eta ...]	582510	582510	35966340	1393340	185598170	28534470	20376270	22350170	32408000	18425470	60223290	66183440	2839540	6830870	582510	582510	6347340	6334340
P70168 [Importin subunit beta-1 ...]	388340	194170	388340	194170	6864400	5995500	388340	194170	388340	194170	388340	194170	388340	194170	388340	194170	388340	194170
P70441 [Na(+)/H(+) exchange regulatory cofactor NHE-RF1 ...]	194170	194170	551520	194170	194170	194170	194170	194170	894400	194170	621250	759970	194170	194170	194170	194170	194170	194170
P70460 [Vasodilator-stimulated phosphoprotein ...]	582510	582510	4401040	4055040	21054470	48687000	582510	582510	2760340	4060570	582510	582510	582510	582510	582510	582510	582510	582510
P80313;A0A0N4SV00 [T-complex protein 1 subunit eta ...]	388340	582510	388340	582510	4470070	13416570	388340	582510	1287270	1627540	2546270	2536240	388340	582510	388340	582510	388340	582510
P80314;A0A1W2P7B7;A0A1W2P828;A0A1W2P871;A0A1W2P6Q3 [T-complex protein 1 subunit beta ...]	582510	582510	582510	582510	12094900	582510	582510	582510	582510	1253440	7417800	3294870	582510	582510	4017570	1665840	582510	582510
P80316;E0CZA1 [T-complex protein 1 subunit epsilon ...]	582510	194170	582510	2009500	3783340	4968500	582510	194170	582510	1379100	4901470	3664600	582510	194170	2383140	1700900	582510	365260
P80318;E9Q133;Q3U0I3;F6Q609 [T-complex protein 1 subunit gamma ...]	582510	582510	582510	582510	27908870	25803470	582510	582510	967210	582510	6090170	5273520	582510	582510	2563840	2566240	582510	582510
P84078;P61205;Q8BSL7;D3YV25;E9Q2C2;A2A6T9 [ADP-ribosylation factor 1;ADP-ribosylation factor ...]	582510	388340	1946240	11551170	63374900	57637000	582510	388340	3718940	3076670	1487440	1179740	582510	388340	582510	388340	582510	388340
P84084 [ADP-ribosylation factor 5 ...]	582510	582510	1946240	11745340	62843700	60843400	582510	582510	3718940	3270840	2943470	2775140	582510	582510	582510	582510	582510	582510
P84096 [Rho-related GTP-binding protein RhoG ...]	1204890	582510	11439570	8744640	26108270	48908400	2375940	2401740	5542440	5209640	2366140	2388040	582510	582510	582510	942460	582510	582510
P84104 [Serine/arginine-rich splicing factor 3 ...]	194170	194170	1918900	2164900	14098000	12775000	194170	194170	194170	194170	194170	194170	194170	194170	194170	194170	194170	194170
P97315 [Cysteine and glycine-rich protein 1 ...]	3420270	3487500	388340	5085700	388340	194170	1241670	194170	388340	194170	388340	194170	388340	194170	388340	194170	388340	194170
P97351 [40S ribosomal protein S3a ...]	582510	582510	582510	582510	18219570	16178170	582510	582510	4292770	2905540	5123970	6953570	582510	582510	1852540	1801840	582510	582510
P97369;A8XU21 [Neutrophil cytosol factor 4 ...]	582510	582510	4691070	6082200	20960700	23061600	582510	582510	582510	2189740	582510	582510	582510	582510	582510	582510	582510	582510
P97384;D3Z7U0 [Annexin A11;Annexin ...]	582510	582510	1451340	1784440	52859000	56731100	582510	582510	582510	582510	1168970	582510	582510	582510	582510	994440	582510	582510
P97425 [Eosinophil cationic protein 2 ...]	388340	388340	3481070	4500210	4904170	9675870	388340	388340	388340	388340	388340	388340	388340	388340	388340	388340	388340	388340
P97426;O35290 [Eosinophil cationic protein 1;Eosinophil cationic- ...]	194170	194170	1913900	2383300	7362700	194170	194170	194170	194170	194170	194170	194170	194170	194170	194170	194170	194170	194170
P97429;F7ANV6;D3Z0S1;A0A0N4SW89;A0A0N4SV57;S4R1F2 [Annexin A4;Annexin ...]	582510	582510	582510	582510	15971670	9861140	582510	582510	1425450	582510	8578300	5662970	582510	582510	4029970	1921740	582510	582510
P97797 [Tyrosine-protein phosphatase non-receptor type sub ...]	194170	194170	194170	194170	4178300	4341900	194170	194170	194170	194170	194170	194170	194170	194170	194170	194170	194170	194170
P97872;Q14DT3;Q8C116 [Dimethylaniline monooxygenase [N-oxide-forming] 5 ...]	10344370	18905700	19679200	16554900	8961340	11606470	3781840	10543000	13828670	10750800	38874900	33573600	2539240	3085240	52802900	40599300	582510	1601340
P99024;Q9CWF2;Q7TMM9;P68372;Q9D6F9;Q922F4;Q9ERD7;CON__ENSEMBL:ENSBTAP00000025008;A2AQ07;G3UZR1;A0A1D5RM76 [Tubulin beta-5 chain;Tubulin beta-2B chain;Tubulin ...]	6748770	3466640	36880100	37437700	249542000	235996000	4249720	6333750	20473900	20674100	17565300	17915900	582510	582510	12730800	9808950	582510	582510
P99026 [Proteasome subunit beta type-4 ...]	194170	388340	194170	388340	5049900	12600500	194170	388340	1575200	388340	1976600	388340	194170	388340	194170	388340	194170	388340
Q00612;A3KG36;Q836V0;G3UWD6;REV__P46662;P97324 [Glucose-6-phosphate 1-dehydrogenase X;Glucose-6-ph ...]	582510	582510	13216500	14760500	97409000	93080000	582510	2095440	3231840	3464140	14090700	11743270	582510	582510	1506740	1687640	582510	582510
Q00623;A0A1L1STX7;CON__P15497 [Apolipoprotein A-I;Proapolipoprotein A-I;Truncated ...]	477779000	490518000	618770000	530720000	457490000	416820000	424179000	396577000	99891000	111546000	70200000	50254000	126058000	132747000	23258800	15572000	23037200	26687700
Q00897 [Alpha-1-antitrypsin 1-4 ...]	618612000	653412000	800410000	850740000	1187780000	824700000	399016000	388925000	167969800	161924700	142544000	144896700	130637000	145560000	35614600	36662200	81240170	86052420
Q00898 [Alpha-1-antitrypsin 1-5 ...]	238488000	214390000	467067000	469911000	871080000	463154000	124555870	168749170	115570970	116268340	51939170	41634570	44965170	59120500	10582770	10887370	10538340	10231940
Q01339;I7HJR3;CON__P17690 [Beta-2-glycoprotein 1 ...]	15358670	19292000	32666000	26024800	16536170	27607800	5571340	6791270	1614040	582510	1769440	582510	582510	582510	582510	582510	582510	582510
Q01853 [Transitional endoplasmic reticulum ATPase ...]	582510	582510	7855500	4353270	35388800	30964700	2959570	1247590	6623670	7676970	10587800	10255100	582510	582510	6862200	2925540	582510	582510
Q02053;P31254 [Ubiquitin-like modifier-activating enzyme 1 ...]	582510	582510	2026540	1883940	31589000	28066100	582510	582510	582510	1210240	1501840	1522340	582510	582510	1440840	1207660	582510	582510
Q02257 [Junction plakoglobin ...]	1160300	388340	194170	388340	194170	388340	194170	388340	194170	3138070	194170	388340	194170	388340	194170	388340	194170	2589270
Q03734;P29621 [Serine protease inhibitor A3M ...]	95855600	100458400	214804000	200478000	430928000	445911000	42064990	40985340	12977270	11519340	16171340	10247840	582510	14346340	5176770	3541840	582510	582510
Q05144;A0A2R8VHH0 [Ras-related C3 botulinum toxin substrate 2 ...]	1204890	2641540	39383300	49561000	181662000	242788000	6727670	6641170	15125570	13484170	3219970	3370070	582510	582510	582510	942460	582510	582510
Q05816 [Fatty acid-binding protein, epidermal ...]	388340	388340	388340	388340	388340	2993570	388340	388340	388340	388340	6751070	14296000	388340	388340	1761970	1883670	388340	388340
Q06770 [Corticosteroid-binding globulin ...]	1773270	582510	8644200	2646540	26514000	33571700	388340	582510	388340	582510	388340	582510	388340	582510	388340	582510	388340	582510
Q06890;E9PUU2;E9PXG5;E9Q8Y5;E9Q9B8;E9Q2G2 [Clusterin;Clusterin beta chain;Clusterin alpha cha ...]	37840400	29088400	53608200	54952900	50753300	23703100	20883300	21338100	24631970	26909970	14845700	14703500	8667810	9797500	1543140	582510	4155040	4512890
Q07456 [Protein AMBP;Alpha-1-microglobulin;Inter-alpha-try ...]	3883970	4189870	20293500	17412800	24009340	20960340	2182940	2582240	582510	582510	582510	582510	582510	582510	582510	582510	582510	582510
Q08093;D3Z7R6;A0A0G2JDV8;Q9DAW9 [Calponin-2 ...]	582510	582510	5724770	2902140	582510	10683340	582510	582510	2943070	1647740	582510	582510	582510	582510	582510	582510	582510	582510
Q19LI2 [Alpha-1B-glycoprotein ...]	5764900	3592770	582510	582510	582510	3935940	4252100	4492600	582510	582510	582510	582510	582510	582510	582510	582510	582510	582510
Q3KQQ2;P04939;Q80YX8;P11590 [Major urinary protein 3 ...]	22845770	38168100	225997000	202435000	582510	582510	4472840	21513170	7712540	8000540	40139600	38730200	5681840	19583670	582510	582510	3375140	3983040
Q3SXK0;P38575 [Uroplakin-2 ...]	5138570	4628070	3549740	2283840	582510	582510	3152670	1723440	582510	2832970	2312340	10936000	582510	582510	10045770	13362770	582510	582510
Q3THE2;Q6ZWQ9;Q9CQ19 [Myosin regulatory light chain 12B;Myosin regulator ...]	1233470	388340	6522170	7338170	53692000	20794300	2563970	2117870	3171470	3098970	5592170	4989870	388340	388340	652280	641010	388340	388340
Q3THW5;P0C0S6;Q8R029;Q3UA95 [Histone H2A.V;Histone H2A.Z;Histone H2A ...]	582510	26240340	717313000	710958000	2180969000	2.10E+09	79569370	82954600	165848470	139199270	117853970	115594570	582510	14705340	66889340	44261340	25974340	25629340
Q3TLP8;P63001;P60764;A2AC13;A0A2R8VH29;A0A1B0GSL4;G3UZM2;D3Z3L1;F2Z463;D3YX61;Q8R527;Q9ER71 [Ras-related C3 botulinum toxin substrate 1;Ras-rel ...]	1204890	2641540	12535770	31787200	32729500	99016300	2375940	2401740	6339450	5858070	2366140	2388040	582510	582510	582510	942460	582510	582510
Q3TML0;Q922R8 [Protein disulfide-isomerase A6 ...]	194170	388340	194170	388340	3897400	7466600	194170	388340	194170	388340	194170	388340	194170	388340	194170	388340	194170	388340
Q3TN85;Q8CAP3;P54726;P54728 [UV excision repair protein RAD23 homolog A;UV exci ...]	388340	194170	388340	194170	388340	194170	388340	194170	1167740	758760	2898400	194170	388340	194170	388340	194170	388340	194170
Q3TYL7;Q9QYJ3 [DnaJ homolog subfamily B member 1 ...]	194170	194170	194170	194170	194170	194170	194170	194170	194170	194170	391670	416630	194170	194170	194170	194170	194170	194170
Q3U2S8 [Voltage-gated hydrogen channel 1 ...]	194170	194170	194170	194170	9105500	7909500	194170	194170	194170	194170	194170	194170	194170	194170	194170	194170	194170	194170
Q3U367;Q9JLJ2 [4-trimethylaminobutyraldehyde dehydrogenase ...]	388340	582510	388340	582510	388340	1849940	388340	582510	388340	582510	3013990	2320480	388340	582510	388340	582510	388340	582510
Q3U3V1;O88947 [Coagulation factor X;Factor X light chain;Factor X ...]	4337770	388340	7923500	6385000	388340	388340	1791170	2250950	388340	388340	388340	388340	388340	388340	388340	388340	388340	388340
Q3U5Q7 [UMP-CMP kinase 2, mitochondrial ...]	194170	388340	194170	388340	4473700	7893100	194170	388340	194170	388340	194170	388340	194170	388340	194170	388340	194170	388340
Q3U9G9;A0A0A6YWS3;A0A0A6YXW3;A0A0A6YXT6;A0A0A6YW01;A0A0A6YY12 [Lamin-B receptor ...]	582510	582510	4525640	5376370	34566200	35458800	582510	582510	4611670	582510	582510	582510	582510	582510	582510	582510	582510	582510
Q3UA72;Q9CPW4 [Actin-related protein 2/3 complex subunit 5 ...]	194170	1303300	11877000	6877200	76446000	81598000	1738600	1699800	4361800	4195500	3900200	2115500	194170	194170	1150300	1039500	194170	194170
Q3UDR8 [Protein YIPF3;Protein YIPF3, N-terminally processe ...]	572860	674210	3162700	2934700	194170	194170	743560	780640	2270500	2333600	1524000	194170	194170	1190600	194170	194170	1352300	1395100
Q3UDS7;A0A1L1SSF2;Q8VDL4 [ADP-dependent glucokinase ...]	582510	582510	10187670	8025900	57115000	57214000	582510	582510	4526270	2011040	582510	582510	582510	582510	582510	582510	582510	582510
Q3UER8;Q8VCM7 [Fibrinogen gamma chain ...]	69525000	75197000	267502000	284006000	226664000	223367000	15361600	12533870	45036000	47703000	9416270	7346840	7088840	2825240	582510	582510	582510	582510
Q3UP87 [Neutrophil elastase ...]	582510	582510	92528000	70770000	75433000	189702000	3166600	582510	15107470	16439530	3660070	3875070	582510	582510	582510	582510	582510	582510
Q3UV17;CON__Q7RTS7;CON__Q32MB2 [Keratin, type II cytoskeletal 2 oral ...]	183471000	205081500	274691600	306512000	89973170	142105000	161011000	115079070	341112900	351445400	188182800	202406900	145428340	166084000	37964070	37426970	152518340	162565170
Q3UVK0;G8JL46;F6TQS9 [Endoplasmic reticulum metallopeptidase 1 ...]	194170	388340	194170	388340	194170	3255370	194170	388340	194170	388340	194170	388340	194170	388340	506200	635720	194170	388340
Q3V3R8;A0A0J9YUI1;A0A0J9YU07;P61087 [Ubiquitin-conjugating enzyme E2 K ...]	194170	194170	194170	194170	194170	194170	194170	194170	194170	194170	1499700	910920	194170	194170	194170	194170	194170	194170
Q4U4S6 [Xin actin-binding repeat-containing protein 2 ...]	194170	194170	194170	194170	194170	18747000	194170	194170	194170	194170	194170	194170	194170	194170	194170	194170	435270	194170
Q504P4;P63017;D3Z5E2 [Heat shock cognate 71 kDa protein ...]	8697870	8555770	26213400	30084700	177146000	221450000	12724650	4653650	11496570	12620670	45836500	28738500	1573840	582510	24524300	23110400	2311140	582510
Q542I8;P11835;M0QWA7;D3YYP8;D3Z1S4 [Integrin beta;Integrin beta-2 ...]	582510	582510	28277200	17860000	107943000	105029000	855300	893680	10842000	8873900	582510	582510	582510	582510	582510	582510	582510	582510
Q543K9;P23492;A0A2I3BQH2;A0A2I3BS22;Q9D8C9 [Purine nucleoside phosphorylase ...]	582510	582510	3603340	6582970	78123000	80567000	582510	582510	7560540	9107540	3154840	582510	582510	582510	582510	582510	582510	582510
Q5EBP8;P49312 [Heterogeneous nuclear ribonucleoprotein A1;Heterog ...]	194170	194170	194170	194170	7329500	5952500	194170	194170	194170	194170	194170	194170	194170	194170	194170	194170	194170	194170
Q5FW60 [Major urinary protein 20 ...]	97216400	94315300	184835000	479384000	582510	582510	109898340	109358340	228438340	229181270	121298170	116984370	87650340	87344070	582510	582510	582510	582510
Q5ND35;Q61247;E9PXE0 [Alpha-2-antiplasmin ...]	4345440	10008600	33430200	28696170	32337340	33035770	582510	582510	582510	582510	582510	582510	582510	582510	582510	582510	582510	582510
Q5RKN9;P47753;A0A0G2JE27 [F-actin-capping protein subunit alpha-1 ...]	582510	582510	1092700	1110470	32632100	34611000	582510	582510	582510	582510	582510	582510	582510	582510	582510	582510	582510	582510
Q5SQG5;P67778 [Prohibitin ...]	194170	388340	194170	388340	194170	1319270	194170	388340	194170	388340	194170	961840	194170	388340	695050	388340	194170	388340
Q5SUA5 [Unconventional myosin-Ig ...]	194170	194170	194170	194170	4100600	6518300	194170	194170	194170	194170	194170	194170	194170	194170	194170	194170	194170	194170
Q5SVG5;Q5SVG4;O35643;H3BKM0;H3BIY9;Q9DBG3 [AP-1 complex subunit beta-1;AP complex subunit bet ...]	582510	388340	582510	388340	14759400	9306200	582510	388340	582510	388340	582510	388340	582510	388340	582510	388340	582510	388340
Q5SW88;P62821;Q5SW87;A0A494BA38;A0A494BBL7;A0A494B945;Q9D1G1;Q5SW86 [Ras-related protein Rab-1A;Ras-related protein Rab ...]	2518440	2364240	11354340	11290340	80149000	67361300	2492640	2527140	5315470	7114700	6805270	582510	582510	582510	6531470	582510	582510	582510
Q5SXR6;Q68FD5;F6Z1R4 [Clathrin heavy chain;Clathrin heavy chain 1 ...]	582510	582510	5254900	2934740	26921000	28124300	582510	582510	582510	582510	1925640	1961340	582510	582510	2142850	582510	582510	582510
Q5XJY5 [Coatomer subunit delta ...]	194170	388340	194170	388340	194170	2134770	194170	388340	194170	388340	790370	1213670	194170	388340	194170	388340	194170	388340
Q60590 [Alpha-1-acid glycoprotein 1 ...]	2166640	5906670	4145240	14016470	83862000	27943170	582510	582510	582510	582510	582510	582510	582510	582510	582510	582510	582510	582510
Q60692 [Proteasome subunit beta type-6 ...]	582510	388340	582510	388340	10167970	10909900	582510	388340	1776940	1398270	3456440	388340	582510	388340	582510	2934870	582510	388340
Q60817;P70670 [Nascent polypeptide-associated complex subunit alp ...]	388340	388340	388340	388340	7553470	10172670	388340	388340	388340	388340	1306470	1401270	388340	388340	388340	388340	388340	388340
Q60864 [Stress-induced-phosphoprotein 1 ...]	582510	582510	582510	582510	10147300	7315570	582510	582510	582510	582510	582510	999370	582510	582510	582510	582510	582510	582510
Q60932 [Voltage-dependent anion-selective channel protein ...]	194170	194170	2835800	3098600	5870400	7615100	194170	194170	194170	194170	194170	194170	194170	194170	194170	194170	194170	194170
Q61029;Q61033 [Lamina-associated polypeptide 2, isoforms beta/del ...]	582510	388340	582510	388340	17615800	14846600	582510	388340	582510	388340	582510	388340	582510	388340	582510	388340	582510	388340
Q61093;E9Q7S3;E9Q802 [Cytochrome b-245 heavy chain ...]	582510	582510	4788840	5210140	57809000	56923000	582510	582510	582510	1206320	582510	582510	582510	582510	582510	582510	582510	582510
Q61129;A0A0G2JF07 [Complement factor I;Complement factor I heavy chai ...]	2981340	2394840	12417000	12596900	10730340	16956170	2408040	2415440	582510	582510	582510	582510	582510	582510	582510	582510	582510	582510
Q61171;D3Z4A4 [Peroxiredoxin-2 ...]	1945140	582510	4989540	8459670	7325440	27207270	2849840	3192840	33196170	37828300	31773100	5744340	4175440	6290570	2788940	3879870	582510	582510
Q61176 [Arginase-1 ...]	582510	582510	582510	582510	139901000	145815000	582510	582510	582510	582510	582510	582510	582510	582510	582510	582510	582510	582510
Q61233;A0A1C7CYV0;B1AX58;Q99K51;D3YZ25;D3YVW8;D3Z7D9;D3Z311;Q3V0K9 [Plastin-2 ...]	582510	582510	41774000	40678000	219322000	214901000	4266370	2721640	25358100	15520800	2480540	2410340	582510	582510	582510	582510	582510	1067650
Q61335 [B-cell receptor-associated protein 31 ...]	484170	194170	194170	194170	194170	2173700	194170	194170	1073600	1221400	2339100	194170	194170	194170	194170	194170	194170	194170
Q61362;D3Z2Z5;D3YXU4 [Chitinase-3-like protein 1 ...]	582510	388340	582510	388340	7188670	8102100	582510	388340	1149620	388340	582510	388340	582510	388340	582510	388340	582510	388340
Q61598;A0A1Y7VL99;A0A1Y7VLG4 [Rab GDP dissociation inhibitor beta ...]	582510	582510	9111700	7049600	45446000	41194000	828810	582510	582510	3166840	6043100	4884270	582510	582510	1764740	582510	582510	582510
Q61599;D3YWL7;A0A0N4SVH4 [Rho GDP-dissociation inhibitor 2 ...]	388340	582510	25336200	28139770	68142000	73643900	388340	582510	7868370	6955540	5913070	7015640	388340	582510	388340	582510	388340	582510
Q61646 [Haptoglobin;Haptoglobin alpha chain;Haptoglobin be ...]	12060880	14078600	52864000	69994000	152313000	165875000	18972370	14274700	80261000	79313000	11720870	5675640	13748700	12669800	582510	582510	582510	2850240
Q61696;P17879 [Heat shock 70 kDa protein 1A;Heat shock 70 kDa pro ...]	582510	582510	582510	582510	582510	582510	12058340	582510	582510	582510	4611970	4574800	582510	582510	3372670	3790670	582510	582510
Q61792;A2A6G9;A2A6H0;A2A6G7;A2A6G8;A2A6G0;A2A6G6 [LIM and SH3 domain protein 1 ...]	582510	582510	4512740	7511770	19185070	12618470	582510	582510	582510	582510	10284540	3077940	582510	582510	7142240	582510	582510	582510
Q61838;D3YUI3;Q6GQT1 [Alpha-2-macroglobulin;Alpha-2-macroglobulin 165 kD ...]	35736000	32231000	73579000	96043000	460720000	378670000	43078000	42920000	22130600	20675400	8486900	4880770	12072300	12411300	582510	582510	582510	3874870
Q61878 [Bone marrow proteoglycan;Eosinophil granule major ...]	388340	388340	14675170	14460170	25144170	53843000	388340	388340	388340	388340	388340	388340	388340	388340	388340	388340	388340	388340
Q62093 [Serine/arginine-rich splicing factor 2 ...]	388340	388340	2676600	1704370	15354300	14511900	388340	388340	388340	388340	1113690	1108310	388340	388340	1161580	1106980	388340	388340
Q62266;Q62267 [Cornifin-A ...]	74887000	51935500	33459200	87625000	9332940	24587340	155696900	32544300	274073900	233089000	1181470000	866890000	46973170	9780340	188942000	334059000	12085340	5843540
Q62465 [Synaptic vesicle membrane protein VAT-1 homolog ...]	388340	388340	388340	388340	388340	2619370	388340	388340	388340	388340	2137900	1291670	388340	388340	735050	388340	388340	388340
Q64339 [Ubiquitin-like protein ISG15 ...]	194170	194170	194170	194170	194170	194170	194170	194170	1445400	1332900	194170	194170	194170	194170	194170	194170	194170	194170
Q64726 [Zinc-alpha-2-glycoprotein ...]	388340	194170	4723370	194170	7239370	5205200	388340	194170	388340	194170	388340	194170	388340	194170	388340	194170	388340	194170
Q64727 [Vinculin ...]	582510	582510	6554400	6215900	17452100	20406400	582510	582510	4315800	1760740	1380570	1203530	582510	582510	582510	582510	582510	582510
Q6A0A2 [La-related protein 4B ...]	194170	194170	194170	176040	1471600	194170	194170	194170	194170	194770	194170	194170	194170	194170	194170	194170	194170	194170
Q6BCL1 [PML-RARA-regulated adapter molecule 1 ...]	194170	194170	194170	194170	2239900	1869000	194170	194170	194170	194170	194170	194170	194170	194170	194170	194170	194170	194170
Q6GT24;D3Z0Y2;O08709;Q8BG37 [Peroxiredoxin-6 ...]	582510	582510	1172500	582510	41711400	28126200	582510	582510	3008640	3060740	582510	582510	582510	582510	582510	582510	582510	582510
Q6P069 [Sorcin ...]	582510	582510	3481970	5029070	29821700	26838900	582510	582510	3233240	582510	2073740	2218940	582510	582510	582510	582510	582510	582510
Q6S9I0;Q6S9I2;Q6S9I3;A0A338P699;A0A338P7D0;E0CYI5;CON__P01045-1;CON__Q2KJ62;CON__P01044-1 [ ...]	52240400	47305270	75255170	61498270	78997170	63628340	44187170	40411100	6716940	10246640	5963940	582510	5065640	5000340	582510	582510	582510	582510
Q6ZQ38 [Cullin-associated NEDD8-dissociated protein 1 ...]	388340	388340	388340	388340	3920570	3299570	388340	388340	388340	388340	1553770	1661870	388340	388340	388340	1412670	388340	388340
Q6ZQM8 [UDP-glucuronosyltransferase 1-7C ...]	582510	582510	5606170	4537670	582510	582510	1140380	582510	582510	582510	2933040	3971770	582510	582510	11416300	6503570	582510	582510
Q6ZWN5;F7CJS8;D3YWH9;Q9CXW7 [40S ribosomal protein S9 ...]	194170	388340	194170	388340	6972500	6402170	194170	388340	194170	388340	194170	2044470	194170	388340	194170	388340	194170	388340
Q6ZWV7 [60S ribosomal protein L35 ...]	194170	778080	194170	388340	10486000	388340	194170	1224070	2802600	2752270	3816400	3679370	194170	388340	194170	869060	194170	388340
Q6ZWZ7;Q9CPR4;B2RY53 [60S ribosomal protein L17 ...]	388340	194170	388340	194170	16791400	5688100	388340	194170	388340	194170	388340	3119500	388340	194170	388340	194170	388340	194170
Q76MZ3;G3UWL2 [Serine/threonine-protein phosphatase 2A 65 kDa reg ...]	582510	582510	582510	582510	19029070	13242970	582510	582510	582510	1984240	3347700	2752670	582510	582510	974750	1467600	582510	582510
Q7TSV4;A0A0G2JG04 [Phosphoglucomutase-2 ...]	582510	388340	582510	388340	2089940	388340	582510	388340	582510	388340	2673370	1522370	582510	388340	1492280	887360	582510	388340
Q80W54 [CAAX prenyl protease 1 homolog ...]	194170	194170	194170	194170	194170	194170	194170	194170	690220	771030	194170	194170	194170	194170	194170	194170	194170	194170
Q80X90 [Filamin-B ...]	582510	582510	4422840	582510	16550340	46499000	582510	1987040	2041070	3215190	8580200	9354400	582510	582510	3147620	3710620	582510	582510
Q80YQ1;P35441;CON__Q28194 [Thrombospondin-1 ...]	582510	582510	582510	582510	35356300	33302900	582510	582510	1575940	1481340	582510	582510	582510	582510	582510	582510	582510	582510
Q80ZS7;Q9D0M5;P63168 [Dynein light chain 2, cytoplasmic;Dynein light cha ...]	194170	194170	194170	194170	5227900	4763500	194170	194170	194170	194170	194170	194170	194170	194170	194170	194170	194170	194170
Q82YW5 [ ...]	388340	582510	388340	582510	388340	582510	1409410	1963570	388340	582510	388340	582510	388340	582510	388340	582510	388340	582510
Q830Q5 [ ...]	388340	194170	388340	194170	388340	194170	3402400	1928800	388340	1021600	388340	194170	388340	194170	388340	194170	388340	194170
Q830Q6 [ ...]	194170	194170	194170	194170	194170	194170	3454700	2878800	194170	194170	194170	194170	194170	194170	194170	194170	194170	194170
Q830Q8 [ ...]	1772800	1536500	194170	839760	194170	194170	5994900	5720400	3861700	4175200	194170	194170	361020	349470	194170	194170	194170	194170
Q833I8;Q834V5 [ ...]	194170	194170	194170	194170	194170	194170	3368200	3388500	194170	194170	194170	194170	194170	194170	194170	194170	194170	194170
Q833I9 [ ...]	582510	388340	582510	388340	582510	388340	7555800	4152000	3359710	388340	582510	388340	582510	388340	582510	388340	582510	388340
Q834N1 [ ...]	194170	388340	194170	388340	194170	388340	1778000	2956600	194170	388340	194170	388340	194170	388340	194170	388340	194170	388340
Q834T3 [ ...]	388340	388340	388340	388340	388340	388340	4818000	4731900	388340	388340	388340	388340	388340	388340	388340	388340	388340	388340
Q835J8 [ ...]	194170	194170	194170	194170	194170	194170	461400	469420	194170	194170	194170	194170	194170	194170	194170	194170	194170	194170
Q835M1 [ ...]	388340	194170	388340	194170	388340	194170	2084090	1459100	388340	194170	388340	194170	388340	194170	388340	194170	388340	194170
Q835M2 [ ...]	194170	194170	194170	194170	194170	194170	1838800	1629500	194170	194170	194170	194170	194170	194170	194170	194170	194170	194170
Q835M3 [ ...]	1176120	1311270	388340	927930	388340	388340	4723700	2290770	1020040	388340	388340	388340	388340	388340	388340	388340	388340	388340
Q835M4 [ ...]	194170	194170	194170	194170	194170	194170	1289700	1415000	194170	194170	194170	194170	194170	194170	194170	194170	194170	194170
Q835R7 [ ...]	388340	388340	388340	388340	388340	388340	3593200	2039270	388340	1849870	388340	388340	388340	388340	388340	388340	388340	388340
Q839E8 [ ...]	194170	194170	194170	194170	194170	194170	194170	194170	1019800	848180	194170	194170	194170	194170	194170	194170	194170	194170
Q839F3 [ ...]	388340	388340	388340	388340	388340	388340	5134800	5678700	388340	388340	388340	388340	388340	388340	388340	388340	388340	388340
Q839F8 [ ...]	1780900	2323400	194170	194170	194170	194170	2186200	2168700	194170	194170	194170	194170	194170	194170	194170	194170	194170	194170
Q839G1 [ ...]	194170	194170	194170	194170	194170	194170	597800	1235400	194170	194170	194170	194170	194170	194170	194170	194170	194170	194170
Q839G5 [ ...]	194170	194170	194170	194170	194170	194170	1930800	1745500	2649000	2521700	194170	194170	194170	194170	194170	194170	194170	194170
Q839G8 [ ...]	5865570	5158670	582510	582510	582510	3477040	13339900	10643870	10729170	8770370	582510	582510	582510	582510	582510	582510	582510	582510
Q8BFR5;A0A0U1RNQ6 [Elongation factor Tu, mitochondrial ...]	388340	194170	388340	194170	388340	194170	388340	194170	388340	194170	669130	479940	388340	194170	1162010	194170	388340	194170
Q8BGQ7 [Alanine--tRNA ligase, cytoplasmic ...]	388340	388340	388340	388340	388340	388340	388340	388340	388340	388340	1275180	692150	388340	388340	667100	609330	388340	388340
Q8BH61 [Coagulation factor XIII A chain ...]	582510	582510	5610640	7276970	43555000	38996000	582510	582510	582510	582510	582510	582510	582510	582510	582510	582510	582510	582510
Q8BHN3 [Neutral alpha-glucosidase AB ...]	582510	388340	582510	922110	4918070	6565500	582510	388340	582510	388340	1256370	388340	582510	388340	582510	388340	582510	388340
Q8BJS4 [SUN domain-containing protein 2 ...]	582510	582510	7219700	8135400	30481200	22634200	582510	582510	1001290	1102270	582510	582510	582510	582510	582510	582510	582510	582510
Q8BJY1 [26S proteasome non-ATPase regulatory subunit 5 ...]	388340	388340	388340	388340	388340	388340	388340	388340	388340	388340	3673260	3567860	388340	388340	2284070	2342370	388340	388340
Q8BMS1 [Trifunctional enzyme subunit alpha, mitochondrial; ...]	582510	388340	1556140	388340	7970070	3447070	582510	388340	1705440	1407870	582510	388340	582510	388340	3096180	388340	582510	388340
Q8BND5 [Sulfhydryl oxidase 1 ...]	2915170	3873180	10504700	8235900	5108540	5897940	582510	582510	582510	582510	582510	582510	582510	582510	582510	582510	582510	582510
Q8BP67 [60S ribosomal protein L24 ...]	194170	194170	194170	194170	5908100	6206300	194170	194170	194170	194170	194170	194170	194170	194170	194170	194170	194170	194170
Q8BPU7 [Engulfment and cell motility protein 1 ...]	194170	194170	194170	194170	3599500	2305600	194170	194170	194170	194170	194170	194170	194170	194170	194170	194170	194170	194170
Q8BT60;Q9D6C8;A0A0R4J0J1;Q3UYN2;Q1RLL3;Q9Z140;Q8BLR2;Q0VE82;Q9DC53;Q8JZW4 [Copine-3 ...]	582510	582510	3737270	7864800	48252000	46176000	582510	582510	582510	582510	582510	582510	582510	582510	582510	582510	582510	582510
Q8C253;P16110 [Galectin;Galectin-3 ...]	6766970	7647600	25442800	18761800	133154000	119409000	582510	582510	7038840	582510	10687470	5182840	582510	582510	5436440	9270570	582510	582510
Q8C266;Q9CQD1;P61021;P35278;A2A5F6;A2A5F5 [Ras-related protein Rab-5A;Ras-related protein Rab ...]	194170	388340	4302800	3927570	12916000	19663500	194170	994440	2314900	1954270	194170	1281470	194170	388340	194170	388340	194170	388340
Q8C2Q7;P70333;O35737 [Heterogeneous nuclear ribonucleoprotein H2;Heterog ...]	388340	388340	388340	2017870	11921400	18302100	388340	388340	388340	388340	1200270	388340	388340	388340	388340	388340	388340	388340
Q8C845;Q9D8Y0 [EF-hand domain-containing protein D2 ...]	388340	194170	388340	194170	24369300	6734800	388340	194170	388340	194170	388340	194170	388340	194170	388340	194170	388340	194170
Q8CAG6;Q9JHK5 [Pleckstrin ...]	388340	194170	2009870	194170	16114500	11278000	388340	194170	388340	194170	388340	194170	388340	194170	388340	194170	388340	194170
Q8CB12;Q3TR54;Q2KHK6 [Gasdermin-C3;Gasdermin-C4;Gasdermin-C2 ...]	194170	388340	194170	388340	3459100	3185370	194170	388340	194170	388340	194170	388340	194170	388340	194170	1186110	194170	388340
Q8CB58;Q8BGJ5;Q922I7;F7C521;F7DCW4;E9QMW9;G8JL74;G3UXA6;Q8BHD7;P17225 [Polypyrimidine tract-binding protein 3;Polypyrimid ...]	388340	388340	2352470	752420	11101600	12445200	388340	388340	388340	388340	388340	388340	388340	388340	811880	388340	388340	388340
Q8CBB6;Q8CGP2;Q8CGP1;Q6ZWY9;Q64525;Q64478;Q64475;P10854;P10853;P70696;Q9D2U9;Q8CGP0;Q64524 [Histone H2B;Histone H2B type 1-P;Histone H2B type ...]	22498970	22813170	1155920000	1087810000	3237690000	3069590000	181456000	180941000	454064000	431040000	165428000	120302000	7734840	17847570	29659600	51877000	15013340	30614000
Q8CBG6;Q9CQ60;D3Z4X1;F6X8L5 [6-phosphogluconolactonase ...]	194170	388340	194170	1474370	5239200	16872600	194170	388340	1492400	1442570	1403500	1506470	194170	388340	194170	388340	194170	388340
Q8CG29;P70248;G3V011 [Unconventional myosin-If ...]	582510	582510	582510	582510	15466800	18095800	582510	582510	582510	582510	582510	582510	582510	582510	582510	582510	582510	582510
Q8CHP8 [Phosphoglycolate phosphatase ...]	194170	388340	194170	388340	3813700	5331800	194170	388340	194170	388340	194170	388340	194170	388340	194170	388340	194170	388340
Q8CI94 [Glycogen phosphorylase, brain form ...]	582510	582510	8577740	8981740	55896800	35486300	582510	582510	3219940	4708670	13496300	14184400	582510	582510	3631680	4252210	582510	582510
Q8CIH5 [1-phosphatidylinositol 4,5-bisphosphate phosphodie ...]	388340	388340	388340	388340	6916200	6174500	388340	388340	388340	388340	388340	388340	388340	388340	388340	388340	388340	388340
Q8CIN4 [Serine/threonine-protein kinase PAK 2;PAK-2p27;PAK ...]	388340	194170	388340	194170	6368970	6240300	388340	194170	388340	194170	1311170	194170	388340	194170	388340	194170	388340	194170
Q8K0E8 [Fibrinogen beta chain;Fibrinopeptide B;Fibrinogen ...]	108424000	103969000	293866000	297997000	97649000	166171000	36023100	43031000	144177000	155525000	33953300	43038900	18267070	23601900	582510	582510	15726500	4529490
Q8K1H9 [Odorant-binding protein 2a ...]	194170	194170	3054200	2735000	194170	194170	194170	194170	194170	194170	194170	194170	194170	194170	194170	194170	194170	194170
Q8K2B3 [Succinate dehydrogenase [ubiquinone] flavoprotein ...]	194170	194170	194170	194170	194170	194170	194170	194170	194170	194170	194170	617700	194170	194170	621950	626120	194170	194170
Q8QZY1 [Eukaryotic translation initiation factor 3 subunit ...]	194170	388340	194170	388340	194170	388340	194170	388340	194170	388340	553660	1858510	194170	388340	194170	388340	194170	388340
Q8R050;F7CE88;Q149F3 [Eukaryotic peptide chain release factor GTP-bindin ...]	194170	194170	194170	194170	194170	194170	194170	194170	194170	194170	1404700	1339400	194170	194170	194170	194170	194170	194170
Q8R0X7;D6REF7 [Sphingosine-1-phosphate lyase 1 ...]	388340	194170	388340	194170	4185170	3208400	388340	194170	388340	194170	2227370	194170	388340	194170	388340	194170	388340	194170
Q8R2S8 [CD177 antigen ...]	582510	582510	8441740	12951270	71304000	80092000	582510	582510	6356070	9987600	582510	582510	582510	582510	582510	582510	582510	582510
Q8VCU2;O70362 [Phosphatidylinositol-glycan-specific phospholipase ...]	1543340	1980000	1362980	4473770	582510	582510	3167640	2906640	582510	582510	582510	582510	582510	582510	582510	582510	582510	582510
Q8VDD5;Q5SV64;Q3UH59;Q61879;A0A2R8VKI5;Q8BXF2;A0A140LI60;E9Q264;A2AQP0 [Myosin-9 ...]	2679680	582510	31369200	33786000	183766000	191245000	4166700	4179000	22508900	20940700	27423400	20209500	582510	582510	8779100	8679700	582510	582510
Q8VDM4 [26S proteasome non-ATPase regulatory subunit 2 ...]	582510	194170	582510	194170	1904840	194170	582510	194170	582510	194170	3099270	194170	582510	194170	582510	727420	582510	194170
Q8VDN2;D3YYN7;A0A0G2JGX4;Q8VCE0;Q6PIC6;Q6PIE5;Q9WV27;Q9Z1W8 [Sodium/potassium-transporting ATPase subunit alpha ...]	194170	388340	194170	388340	194170	6767870	194170	388340	194170	388340	194170	388340	194170	388340	705000	1143570	194170	388340
Q8VDU4;E9PXI0;P27870;Q9R0C8 [Proto-oncogene vav;Guanine nucleotide exchange fac ...]	194170	194170	194170	194170	4337700	1801900	194170	194170	194170	194170	194170	194170	194170	194170	194170	194170	194170	194170
Q8VEK3 [Heterogeneous nuclear ribonucleoprotein U ...]	582510	582510	2314240	2299440	20535300	32187700	582510	582510	582510	582510	1672840	2555670	582510	582510	1655340	1442740	582510	582510
Q91V55;D3YYM6;D3Z1S8;P97461 [40S ribosomal protein S5;40S ribosomal protein S5, ...]	2561240	582510	582510	582510	7802170	5681940	582510	582510	1767540	1960360	1836140	4243770	582510	582510	582510	582510	582510	582510
Q91VB8;P01942 [Hemoglobin subunit alpha ...]	263149000	330150000	1964290000	1701860000	6622100000	6642300000	307257000	211420170	1477560000	1565155000	92635170	89930170	286549900	425340000	188859170	71468170	9710640	9225240
Q91X17;A0A140LI10 [Uromodulin;Uromodulin, secreted form ...]	223063000	245294000	181664000	192251000	582510	582510	35688400	15662300	762560000	734060000	62226200	74403000	36824900	41587000	1063740	582510	42985400	41995900
Q91X72;A0A1B0GS57 [Hemopexin ...]	104851000	95544000	205335000	211563000	527160000	5.48E+08	77307000	83595000	46066000	53527000	14187100	15764400	12147070	16236200	2736670	3153270	582510	3062940
Q91XL1 [ ...]	582510	194170	15018670	8701100	9115370	3825200	582510	194170	582510	194170	582510	194170	582510	194170	582510	194170	582510	194170
Q91YQ5;A0A0N4SUJ8 [Dolichyl-diphosphooligosaccharide--protein glycosy ...]	582510	388340	582510	388340	13979000	12225200	582510	388340	582510	388340	582510	388340	582510	388340	2157740	388340	582510	388340
Q91YR9;REV__Q3TVC7;REV__A0A0R4J177 [Prostaglandin reductase 1 ...]	582510	582510	3451470	3034970	15010700	14165400	1286010	582510	582510	582510	9413040	15291770	582510	582510	5129170	1200740	582510	582510
Q91Z25;Q9WV32;F6VVE6;D3Z6S0;F6THG2 [Actin-related protein 2/3 complex subunit 1B ...]	582510	582510	20747670	5936940	124770000	94470000	582510	582510	582510	582510	582510	3204040	582510	582510	582510	582510	582510	582510
Q91Z98 [Chitinase-like protein 4 ...]	582510	582510	37562570	42573040	299460100	296838200	582510	582510	4530940	11506670	1877440	1422440	582510	582510	582510	582510	582510	582510
Q921I1;D3YYR8;F7BAE9;E9Q2Q7;F7CJN9;E9Q939;CON__Q29443;CON__Q0IIK2;CON__Q2HJF0 [Serotransferrin ...]	464190000	450920000	849040000	723510000	1058500000	1023900000	306561000	314599000	77564000	156291000	101469000	87268000	84342000	89123000	12390700	20396800	42812600	40702100
Q921L6;Q60598 [Src substrate cortactin ...]	582510	582510	582510	582510	582510	582510	582510	582510	582510	1518440	4944610	4684400	582510	582510	2389340	2020240	582510	582510
Q921R2;P62301;A0A0U1RQ71 [40S ribosomal protein S13 ...]	388340	388340	388340	388340	12164170	19224300	1269670	1192070	388340	388340	2252470	2228170	388340	388340	1290270	1265670	388340	388340
Q922B2 [Aspartate--tRNA ligase, cytoplasmic ...]	582510	582510	582510	2935940	16063470	29231100	582510	582510	582510	582510	582510	582510	582510	582510	869140	582510	582510	582510
Q924B0;O55023;Q80ZJ2 [Inositol monophosphatase 1 ...]	582510	582510	582510	582510	19959500	16454700	582510	582510	582510	582510	1140660	1130610	582510	582510	582510	582510	582510	582510
Q93EU6 [ ...]	194170	388340	194170	388340	194170	388340	194170	1246270	768110	1032990	194170	388340	194170	388340	194170	388340	194170	388340
Q99JI6;A0A0G2JDL9;P62835;A0A0G2JE52;A0A0G2JED9;A0A1W2P777 [Ras-related protein Rap-1b;Ras-related protein Rap ...]	582510	582510	11757900	10193970	51861000	82224000	1554140	582510	8604000	19010000	1411040	1396840	582510	582510	582510	582510	582510	582510
Q99JY0;D3YXU1 [Trifunctional enzyme subunit beta, mitochondrial;3 ...]	1427140	194170	582510	194170	582510	194170	582510	194170	871680	194170	2642880	194170	582510	194170	582510	2620600	582510	194170
Q99JY9;A0A087WS98;A0A087WP86;A0A087WQ14;A0A087WRA1;Q641P0;A0A087WQ83 [Actin-related protein 3 ...]	582510	582510	13720200	9836000	50895800	71948000	582510	582510	582510	582510	4403770	2858640	582510	582510	582510	1340390	582510	582510
Q99KI0 [Aconitate hydratase, mitochondrial ...]	194170	388340	194170	388340	194170	388340	194170	388340	194170	388340	194170	1453270	194170	388340	835950	1138490	194170	388340
Q99KJ8 [Dynactin subunit 2 ...]	388340	388340	388340	388340	388340	388340	388340	388340	388340	388340	904860	954010	388340	388340	988490	1087770	388340	388340
Q99LB4;P24452;D3YZN3;D3YU77;D3YTL5;D3Z4K5 [Macrophage-capping protein ...]	582510	582510	582510	582510	40368900	44397400	2397340	2197540	3276240	2763440	5123270	4164040	582510	582510	582510	2478840	582510	582510
Q99P58 [Ras-related protein Rab-27B ...]	194170	194170	194170	194170	194170	194170	194170	194170	194170	194170	1191700	194170	194170	194170	682550	812110	194170	194170
Q99PT1 [Rho GDP-dissociation inhibitor 1 ...]	1217270	1221770	388340	388340	15055170	16207170	388340	388340	388340	388340	6743900	3658870	388340	388340	388340	1628470	388340	388340
Q9CPX4;A0A1B0GR60;P29391;A0A1B0GRH4;P49945;A0A1Y7VNT9 [Ferritin;Ferritin light chain 1;Ferritin light cha ...]	388340	1445640	4674770	6021340	65001000	147271000	388340	582510	388340	582510	388340	582510	388340	582510	388340	582510	388340	582510
Q9CQI6;A0A1D5RLP1 [Coactosin-like protein ...]	582510	582510	24158170	23593900	49213170	37618170	1697840	582510	3845740	8768070	582510	1359380	582510	582510	582510	582510	582510	582510
Q9CQR2 [40S ribosomal protein S21 ...]	761210	388340	388340	388340	4233270	388340	731170	388340	388340	388340	4420770	388340	388340	388340	3604470	4431900	388340	388340
Q9CQV8;A2A5N1 [14-3-3 protein beta/alpha;14-3-3 protein beta/alph ...]	3560440	582510	45552500	13827870	203875000	32459870	23630300	25821600	35015900	17614340	77719900	84340900	2839540	6830870	4215640	582510	6347340	6334340
Q9CQW9;A0A1B0GT68;Q99J93 [Interferon-induced transmembrane protein 3;Interfe ...]	194170	194170	194170	194170	11713000	7748900	194170	194170	194170	194170	194170	194170	194170	194170	194170	194170	194170	194170
Q9CR16 [Peptidyl-prolyl cis-trans isomerase D ...]	194170	194170	194170	194170	5252400	6358500	194170	194170	194170	194170	194170	194170	194170	194170	194170	194170	194170	194170
Q9CR57 [60S ribosomal protein L14 ...]	388340	388340	1571570	1502870	12042500	9139970	944950	1127950	3102170	3190870	1678170	2790200	388340	388340	1402970	388340	388340	388340
Q9CVB6;D3YXG6;A0A087WRT2 [Actin-related protein 2/3 complex subunit 2 ...]	582510	1119900	20676600	18251400	78788000	68228000	1773840	1576140	1392940	1400840	6327140	8130160	582510	582510	1454840	1326920	999730	1066020
Q9CWJ9 [Bifunctional purine biosynthesis protein PURH;Phos ...]	194170	582510	194170	582510	3652400	7945970	194170	582510	194170	582510	194170	1691540	194170	582510	194170	582510	194170	582510
Q9CX34 [Suppressor of G2 allele of SKP1 homolog ...]	194170	388340	194170	388340	194170	5716400	194170	388340	851330	1258070	2307600	2141270	194170	388340	194170	718440	194170	388340
Q9CZ13;A0A0A6YW82 [Cytochrome b-c1 complex subunit 1, mitochondrial ...]	388340	388340	388340	388340	7546500	7543500	388340	388340	388340	388340	1488970	388340	388340	388340	388340	2218170	388340	388340
Q9CZM2;B8JKK2 [60S ribosomal protein L15;Ribosomal protein L15 ...]	567500	388340	388340	1302770	6811670	13055700	1184440	1237270	388340	1451570	2946070	3052370	388340	388340	2385170	2345070	388340	388340
Q9CZX8;D3YUT3;D3YUG3;D3Z5R8;D3Z722;S4R223 [40S ribosomal protein S19 ...]	1623840	1138570	1669540	582510	19737100	11761570	582510	582510	2179240	582510	1830540	1788740	582510	582510	5089560	5051270	582510	582510
Q9D0I9 [Arginine--tRNA ligase, cytoplasmic ...]	194170	194170	194170	194170	6229300	3467600	194170	194170	194170	194170	194170	194170	194170	194170	194170	194170	194170	194170
Q9D0J8 [Parathymosin ...]	1108900	1073900	194170	194170	194170	194170	1509800	194170	194170	194170	1665200	1379700	194170	194170	910730	810280	194170	194170
Q9D132 [Uroplakin-1a ...]	7774000	7679400	388340	4598870	388340	388340	388340	388340	388340	388340	2598170	2655370	388340	388340	388340	388340	388340	388340
Q9D154;Z4YK03;Q8VHP7;Q5SV42 [Leukocyte elastase inhibitor A ...]	582510	582510	26425600	38672200	121714000	175386000	3875270	1538740	16473000	14986100	6760870	582510	582510	582510	582510	582510	582510	582510
Q9D2V7 [Coronin-7 ...]	194170	388340	194170	388340	4043900	9174700	194170	388340	194170	388340	194170	388340	194170	388340	194170	388340	194170	388340
Q9D668 [Arrestin domain-containing protein 2 ...]	194170	2327300	194170	194170	7783100	6761300	194170	194170	194170	194170	194170	194170	194170	194170	194170	194170	194170	194170
Q9D6Y7;A0A1B0GT40 [Mitochondrial peptide methionine sulfoxide reducta ...]	388340	194170	2059570	1795500	16889170	15902000	388340	194170	1119330	194170	388340	194170	388340	194170	388340	194170	388340	194170
Q9D819 [Inorganic pyrophosphatase ...]	194170	194170	712140	194170	194170	194170	194170	194170	194170	194170	194170	3790800	194170	194170	194170	2420800	194170	194170
Q9D898 [Actin-related protein 2/3 complex subunit 5-like p ...]	194170	194170	194170	194170	2239300	2263600	194170	194170	194170	194170	194170	736990	194170	194170	194170	562010	194170	194170
Q9D8D6;B2RV77 [ ...]	194170	194170	194170	194170	6508700	5629900	194170	194170	194170	194170	194170	194170	194170	194170	194170	194170	194170	194170
Q9D8E6 [60S ribosomal protein L4 ...]	194170	582510	194170	582510	194170	11887770	194170	582510	194170	582510	2920600	2922040	194170	582510	194170	1264210	194170	582510
Q9D8N0 [Elongation factor 1-gamma ...]	582510	1224620	2277140	2485240	6312040	22782170	582510	582510	1875440	582510	4117760	7078900	582510	582510	2578040	2188940	582510	582510
Q9D997;Q9QZ08;D3YXG2 [N-acetyl-D-glucosamine kinase ...]	194170	194170	194170	194170	194170	194170	194170	194170	194170	194170	1061400	871080	194170	194170	194170	194170	194170	194170
Q9DAY9;Q5SQB0;Q5SQB5;Q61937 [Nucleophosmin ...]	388340	388340	2087970	2189170	13938400	388340	388340	388340	388340	388340	388340	3092470	388340	388340	388340	388340	388340	388340
Q9DB77;A0A140LI98 [Cytochrome b-c1 complex subunit 2, mitochondrial ...]	194170	388340	194170	388340	194170	12798900	194170	388340	194170	388340	194170	388340	194170	388340	1001400	388340	194170	388340
Q9DBB9 [Carboxypeptidase N subunit 2 ...]	3553170	2766740	6040970	5975370	9672140	20586070	3275340	4144370	582510	582510	582510	582510	582510	582510	582510	582510	582510	582510
Q9DBJ1;O70250 [Phosphoglycerate mutase 1;Phosphoglycerate mutase ...]	582510	1426140	18402300	16008900	129593000	116245000	582510	582510	582510	5485840	1072490	1650540	582510	582510	1763640	582510	582510	582510
Q9DBS1 [Transmembrane protein 43 ...]	194170	194170	194170	194170	4334600	3481700	194170	194170	194170	194170	194170	194170	194170	194170	194170	194170	194170	194170
Q9DC51 [Guanine nucleotide-binding protein G(k) subunit al ...]	582510	582510	18114300	15844200	50387800	33145200	582510	582510	3180740	2739440	582510	840190	582510	582510	582510	582510	582510	582510
Q9DCD0 [6-phosphogluconate dehydrogenase, decarboxylating ...]	582510	582510	47990000	40553900	158754000	225844000	2140340	3707470	15172400	10767470	21159800	19803500	582510	582510	582510	582510	1628040	582510
Q9DCM0 [Persulfide dioxygenase ETHE1, mitochondrial ...]	194170	194170	1772200	2233400	8452200	9627900	194170	194170	194170	194170	194170	194170	194170	194170	194170	194170	194170	194170
Q9EQ06 [Estradiol 17-beta-dehydrogenase 11 ...]	388340	582510	388340	2061940	20200400	26294300	388340	582510	388340	582510	388340	1072990	388340	582510	997350	1206490	388340	582510
Q9EQ20 [Methylmalonate-semialdehyde dehydrogenase [acylati ...]	194170	388340	194170	388340	194170	388340	194170	388340	194170	388340	194170	1016470	194170	388340	535960	388340	194170	388340
Q9EQH3 [Vacuolar protein sorting-associated protein 35 ...]	388340	194170	738880	194170	5659470	5212400	388340	194170	388340	194170	388340	194170	388340	194170	388340	194170	388340	194170
Q9ERI2 [Ras-related protein Rab-27A ...]	388340	388340	388340	388340	16029000	16466500	388340	388340	388340	388340	388340	388340	388340	388340	388340	388340	388340	388340
Q9ERL7;D3Z2F6;D3YY16;A0A2I3BR94;A0A2I3BPS1;Q9CQI3 [Glia maturation factor gamma;Glia maturation facto ...]	194170	388340	5486700	8147300	194170	4456770	194170	388340	2703300	2935170	194170	1104700	194170	388340	194170	388340	194170	388340
Q9ET01;Q3UEJ6;E9PUM3 [Glycogen phosphorylase, liver form;Alpha-1,4 gluca ...]	582510	582510	15821500	15031100	69213000	67332000	582510	582510	3219940	3430140	582510	10902300	582510	582510	582510	2979140	582510	582510
Q9JI91;O88990 [Alpha-actinin-2;Alpha-actinin-3 ...]	194170	194170	194170	194170	194170	1437500	194170	194170	194170	194170	194170	194170	194170	194170	194170	194170	1747100	194170
Q9JI95;Q64433 [10 kDa heat shock protein, mitochondrial ...]	388340	582510	3342900	582510	16805600	18423070	388340	582510	1125330	582510	1771370	1865740	388340	582510	388340	2715340	388340	582510
Q9JII6;B1AXW3 [Alcohol dehydrogenase [NADP(+)] ...]	194170	1257480	194170	582510	194170	582510	617170	582510	194170	582510	4432600	4072170	194170	582510	1145000	1434640	194170	582510
Q9JKF1;A0A0U1RNG5;Q3UQ44;A0A0U1RPU3;Q3UQP1;F8VQ29 [Ras GTPase-activating-like protein IQGAP1 ...]	582510	582510	11396400	10540600	83095000	74118000	582510	582510	1888840	3916270	942970	582510	582510	582510	582510	582510	582510	582510
Q9JKX8 [Uroplakin-3a ...]	194170	388340	194170	388340	194170	388340	194170	388340	194170	388340	194170	388340	194170	388340	3158800	3527610	194170	388340
Q9JM76;H7BWZ3;A0A0G2JFK7;D3Z2F7;D3Z2F8 [Actin-related protein 2/3 complex subunit 3 ...]	582510	582510	16508070	15575270	44230700	60225000	582510	582510	582510	582510	4930870	3941940	582510	582510	582510	582510	582510	582510
Q9QUI0;A0A0A6YXF6;Q62159;A0A0G2JEP8;H3BL56;A0A0A6YWJ1;Q9CR99;P62746 [Transforming protein RhoA;Rho-related GTP-binding ...]	582510	1211770	18542600	9899270	52983000	32285600	582510	582510	2820670	1185670	3855970	1898040	582510	582510	582510	582510	582510	582510
Q9QUM9;E0CXB1 [Proteasome subunit alpha type-6 ...]	388340	388340	388340	388340	28739100	27705400	388340	388340	388340	388340	388340	388340	388340	388340	388340	388340	388340	388340
Q9QXC1;Q6YJU1 [Fetuin-B ...]	3541770	3747970	10999170	11241170	20370400	14830170	3053470	4913400	388340	388340	388340	895070	388340	388340	388340	388340	388340	388340
Q9QXT9 [Zinc finger protein 354B ...]	9550900	9627100	194170	194170	194170	194170	7262600	6748500	194170	194170	194170	194170	194170	194170	194170	194170	194170	194170
Q9QZQ8;Q8CCK0 [Core histone macro-H2A.1 ...]	582510	582510	6822970	5140070	25473500	24266600	582510	582510	582510	1005860	1098840	1182170	582510	582510	1447940	1539240	582510	582510
Q9R0P5;P45591 [Destrin ...]	3105540	4058340	13183870	12461370	49611000	48326000	2878840	2979340	1775840	1779440	43365600	17736300	1063270	582510	4881550	3865040	582510	582510
Q9R0P9 [Ubiquitin carboxyl-terminal hydrolase isozyme L1 ...]	1201590	582510	3091440	8612600	582510	582510	1616040	1142670	7479770	7525870	47324000	29316170	582510	582510	25771700	26519800	1443540	1448740
Q9R0Q6 [Actin-related protein 2/3 complex subunit 1A ...]	194170	194170	194170	194170	194170	194170	194170	194170	194170	194170	2000400	1138400	194170	194170	862260	194170	194170	194170
Q9R111;D3YU09;A0A494B982 [Guanine deaminase ...]	582510	582510	2657640	582510	29741700	51279900	582510	582510	582510	582510	582510	582510	582510	582510	582510	582510	582510	582510
Q9R1P3 [Proteasome subunit beta type-2 ...]	194170	388340	194170	1040030	10855000	9906570	194170	388340	194170	1223370	194170	796020	194170	388340	194170	388340	194170	388340
Q9WTL2 [Ras-related protein Rab-25 ...]	388340	582510	2456170	2992240	7356270	7533140	388340	582510	388340	582510	819000	1808050	388340	582510	1904910	908300	388340	582510
Q9WU78 [Programmed cell death 6-interacting protein ...]	194170	388340	194170	388340	2332400	7122600	194170	388340	194170	388340	194170	388340	194170	388340	194170	388340	194170	388340
Q9WUH2 [LIM/homeobox protein Lhx9 ...]	194170	194170	194170	194170	194170	194170	194170	194170	3948500	3440700	194170	194170	194170	194170	194170	194170	194170	194170
Q9WUM3;D3YUG6;A0A494B9Y4 [Coronin-1B;Coronin ...]	388340	194170	388340	194170	11678170	3276500	388340	194170	388340	194170	784460	194170	388340	194170	388340	194170	388340	194170
Q9WV55 [Vesicle-associated membrane protein-associated pro ...]	194170	194170	194170	2364700	6592200	8671900	194170	194170	194170	194170	194170	194170	194170	194170	194170	194170	194170	194170
Q9WVA4;A0A0A6YXG6;Q9R1Q8 [Transgelin-2 ...]	582510	582510	12093340	9018840	76708000	68793000	582510	582510	582510	5745470	2169540	1933140	582510	582510	582510	582510	582510	582510
Q9WVF5;Q01279 [Epidermal growth factor receptor ...]	582510	194170	2282940	1389700	4759740	194170	582510	194170	582510	194170	582510	194170	582510	194170	582510	194170	582510	194170
Q9WVK4 [EH domain-containing protein 1 ...]	388340	388340	388340	388340	21085400	18130600	388340	388340	388340	388340	388340	388340	388340	388340	388340	388340	388340	388340
Q9Z183;E9QAM4;Q9Z184 [Protein-arginine deiminase type-4 ...]	388340	582510	3700870	3950440	30455000	45128000	388340	582510	388340	582510	388340	582510	388340	582510	388340	582510	388340	582510
Q9Z1N5;G3UXI6;Q8VDW0;D6RHT5 [Spliceosome RNA helicase Ddx39b;ATP-dependent RNA ...]	582510	582510	582510	582510	27257900	25575600	582510	582510	582510	582510	582510	582510	582510	582510	1341620	1132830	582510	582510
Q9Z1Q5 [Chloride intracellular channel protein 1 ...]	582510	582510	7807570	11825300	30079200	37208700	1256750	582510	582510	582510	2372240	2777920	582510	582510	582510	582510	582510	582510
Q9Z2M7 [Phosphomannomutase 2 ...]	388340	388340	388340	388340	388340	388340	388340	388340	388340	388340	2136880	1961640	388340	388340	994350	388340	388340	388340
Q9Z2U0;A0A338P7D7;Q9CWH6;B7ZMS4 [Proteasome subunit alpha type-7;Proteasome subunit ...]	1128930	582510	2697140	3710970	28107000	36200800	582510	1189310	1670140	1636940	6806770	6825600	582510	582510	582510	1614240	582510	582510
Q9Z2U1 [Proteasome subunit alpha type-5 ...]	194170	194170	194170	1378800	5521900	6041900	194170	194170	194170	194170	1425400	1421700	194170	194170	194170	194170	194170	194170
Q9Z2X1;J3QM80;J3QMT0 [Heterogeneous nuclear ribonucleoprotein F;Heteroge ...]	388340	388340	388340	388340	16370700	17954500	388340	388340	388340	388340	388340	388340	388340	388340	1759270	1771170	388340	388340
S4R1M0;P06800 [Protein-tyrosine-phosphatase;Receptor-type tyrosin ...]	582510	388340	582510	388340	15731600	7408400	582510	388340	582510	388340	582510	388340	582510	388340	582510	388340	582510	388340
S4R1N6;F6YVP7;P62270;A0A1Y7VKY1;A0A3Q4EGP3 [40S ribosomal protein S18 ...]	1348600	1386730	1655940	1658240	22445000	22937800	2306540	2213840	2245940	582510	4820540	4723120	582510	582510	2809540	2999940	582510	582510
S4R1W1;P16858;A0A1D5RLD8;A0A0A0MQF6;S4R257;S4R1W8;V9GX06;A0A0R4J0X7;S4R2G5;Q64467;S4R1N5;V9GXK0 [Glyceraldehyde-3-phosphate dehydrogenase ...]	12509070	14717970	46057000	68901000	493650000	499510000	26206770	30535100	29820170	61432000	19813870	61179000	5616840	5334940	7485070	8676710	582510	1431040
S4R293;F8WH69;Q09014 [Neutrophil cytosol factor 1 ...]	582510	582510	3695540	5272270	36148000	27980700	582510	582510	582510	3680040	582510	582510	582510	582510	582510	582510	582510	582510
Z4YKB8;Q3TEA8;A2AM65;Z4YKA3;A2AM63;A2AM69;A2AM70;A2AM62 [Heterochromatin protein 1-binding protein 3 ...]	582510	388340	1139510	388340	10532070	6591300	582510	388340	877890	388340	582510	388340	582510	388340	582510	388340	582510	388340
