# Supplementary material for: Inhibiting host-protein deposition on urinary catheters reduces associated urinary tract infections
Source: eLife. 2022 Mar 29;11:e75798. doi: 10.7554/eLife.75798 (PMC8986317; doi:10.7554/eLife.75798)
Supplement: Figure 6—source data 1. — Individual data from all figures involving small datasets displayed in individual tabs of this source file. This includes Figures 1B and 2A-F, Figure 3B, Figure 4, Figure 1—figure supplement 1 and Figure 2—figure supplement 1. [file elife-75798-fig6-data1.zip › Flores_Data/AF1_parameters_from_session_1577059609020.txt]

#ProteoSign parameters files for AF1 (session ID: 1577059609020)
#
#File Information:
isLabelFree
true
isIsobaricLabel
false
procprogram
MQ
#User Parameters and commands:
rawfiles_structure
11222019_Flores_Cat_1-1	1	1	1	1		11222019_Flores_Cat_1-2	2	1	1	1		11222019_Flores_Cat_10-2	2	1	1	1		11222019_Flores_Cat_10-1	1	1	1	1		11222019_Flores_Cat_3-1	1	1	1	1		11222019_Flores_Cat_3-2	2	1	1	1		11222019_Flores_Cat_4-2	2	1	1	1		11222019_Flores_Cat_4-1	1	1	1	1		11222019_Flores_Cat_5-1	1	1	1	1		11222019_Flores_Cat_6-1	1	1	1	1		11222019_Flores_Cat_7-1	1	1	1	1		11222019_Flores_Cat_8-1	1	1	1	1		11222019_Flores_Cat_9-1	1	1	1	1		11222019_Flores_Cat_5-2	2	1	1	1		11222019_Flores_Cat_6-2	2	1	1	1		11222019_Flores_Cat_7-2	2	1	1	1		11222019_Flores_Cat_8-2	2	1	1	1		11222019_Flores_Cat_9-2	2	1	1	1		
expid
AF1
!Rename
Cat_1|Cat_1||Cat_3|Cat_3||Cat_4|Cat_4||Cat_5|Cat_5||Cat_6|Cat_6||Cat_7|Cat_7||Cat_8|Cat_8||Cat_10|Cat_10||Cat_9|Cat_9||
exptpoint
AFCat1
conditions_to_compare
Cat_1	Cat_3	Cat_4	Cat_5	Cat_6	Cat_7	Cat_8	Cat_10	Cat_9	
quantitation_filtering
F
filtering_label
undefined
peptide_level_filtering
F
LeastBRep
2
LeastPep
2
Pthreshold
0.05
LFQconditions
11222019_Flores_Cat_1-1	Cat_1		11222019_Flores_Cat_1-2	Cat_1		11222019_Flores_Cat_3-1	Cat_3		11222019_Flores_Cat_3-2	Cat_3		11222019_Flores_Cat_4-1	Cat_4		11222019_Flores_Cat_4-2	Cat_4		11222019_Flores_Cat_5-1	Cat_5		11222019_Flores_Cat_5-2	Cat_5		11222019_Flores_Cat_6-1	Cat_6		11222019_Flores_Cat_6-2	Cat_6		11222019_Flores_Cat_7-1	Cat_7		11222019_Flores_Cat_7-2	Cat_7		11222019_Flores_Cat_8-1	Cat_8		11222019_Flores_Cat_8-2	Cat_8		11222019_Flores_Cat_10-1	Cat_10		11222019_Flores_Cat_10-2	Cat_10		11222019_Flores_Cat_9-1	Cat_9		11222019_Flores_Cat_9-2	Cat_9		
!LS_Array

!LS_c_p_Add

!Select_Labels
Cat_1|Cat_3|Cat_4|Cat_5|Cat_6|Cat_7|Cat_8|Cat_10|Cat_9|
!RMrawfilesdata

!RMtagsdata

!RMbrepsRepInRawFiles
true
!RMtrepsRepInRawFiles
true
!RMconditionsRepInRawFiles
true
!RMisused
false
