# Supplementary material for: Inhibiting host-protein deposition on urinary catheters reduces associated urinary tract infections
Source: eLife. 2022 Mar 29;11:e75798. doi: 10.7554/eLife.75798 (PMC8986317; doi:10.7554/eLife.75798)
Supplement: Figure 6—source data 1. — Individual data from all figures involving small datasets displayed in individual tabs of this source file. This includes Figures 1B and 2A-F, Figure 3B, Figure 4, Figure 1—figure supplement 1 and Figure 2—figure supplement 1. [file elife-75798-fig6-data1.zip › Flores_Data/AF1_proteinGroupsDF.txt]

Protein.IDs	nas	Intensity.Cat_1.b1t1	Intensity.Cat_3.b1t1	Intensity.Cat_4.b1t1	Intensity.Cat_5.b1t1	Intensity.Cat_6.b1t1	Intensity.Cat_7.b1t1	Intensity.Cat_8.b1t1	Intensity.Cat_10.b1t1	Intensity.Cat_9.b1t1	b1t1.Ratio.counts	b1t1.uniqueSequences	Intensity.Cat_1.b2t1	Intensity.Cat_3.b2t1	Intensity.Cat_4.b2t1	Intensity.Cat_5.b2t1	Intensity.Cat_6.b2t1	Intensity.Cat_7.b2t1	Intensity.Cat_8.b2t1	Intensity.Cat_10.b2t1	Intensity.Cat_9.b2t1	b2t1.Ratio.counts	b2t1.uniqueSequences	Cat_1	Cat_3	Cat_4	Cat_5	Cat_6	Cat_7	Cat_8	Cat_10	Cat_9	Cat_1p	Cat_3p	Cat_4p	Cat_5p	Cat_6p	Cat_7p	Cat_8p	Cat_10p	Cat_9p	time.point
A0A075B5P3;A0A0A6YVP0;P01867 [Ig gamma-2B chain C region ...]	0	4609540	3823840	20565100	5865570	582510	582510	582510	582510	582510	5	8	11119100	4118940	16621500	5798670	1317740	582510	582510	582510	582510	4	10	4	2	7	4	1	0	0	0	0	22.22222222	11.11111111	38.88888889	22.22222222	5.555555556	0	0	0	0	AFCat1
A0A075B5P4;A0A0A6YWR2;P01868;P01869 [Ig gamma-1 chain C region secreted form;Ig gamma-1 ...]	0	7344800	8391000	194170	7517600	194170	1038200	194170	194170	194170	1	4	7146900	8835300	194170	6530400	194170	1046600	1928300	194170	194170	1	5	2	2	0	2	0	2	1	0	0	22.22222222	22.22222222	0	22.22222222	0	22.22222222	11.11111111	0	0	AFCat1
A0A075B5P5;A0A1Y7VJN6;P03987 [Ig gamma-3 chain C region ...]	0	388340	6765400	4590870	388340	388340	388340	388340	388340	388340	2	3	1072830	4677270	388340	388340	388340	388340	388340	388340	388340	2	2	1	3	1	0	0	0	0	0	0	20	60	20	0	0	0	0	0	0	AFCat1
A0A075B5P6;A0A075B6A0;P01872 [Ig mu chain C region ...]	0	2981030	582510	35402600	5390470	582510	582510	582510	582510	582510	5	9	1994840	2856040	28384500	2265240	582510	582510	582510	582510	582510	5	7	3	1	9	3	0	0	0	0	0	18.75	6.25	56.25	18.75	0	0	0	0	0	AFCat1
A0A087WPL5;E9QNN1;O70133;Q3UR42 [ATP-dependent RNA helicase A ...]	0	194170	194170	3809000	194170	194170	194170	194170	194170	194170	1	1	194170	194170	2990000	194170	194170	194170	194170	194170	194170	1	1	0	0	2	0	0	0	0	0	0	0	0	100	0	0	0	0	0	0	AFCat1
A0A087WRJ2;A0A087WPF8;A0A087WSR2;E9QN99;A0A087WP24;Q8VCR7;A0A1L1SRH5;A0A1L1SUX1 [Alpha/beta hydrolase domain-containing protein 14B ...]	0	582510	582510	582510	582510	582510	5348400	582510	2463470	582510	3	5	194170	194170	194170	194170	194170	194170	194170	1128900	194170	1	1	3	0	0	0	0	3	0	3	0	33.33333333	0	0	0	0	33.33333333	0	33.33333333	0	AFCat1
A0A087WSQ5;Q99K94;Q8C3V4;A0A087WSP5;P42225 [Signal transducer and activator of transcription;S ...]	0	194170	194170	6673400	194170	194170	194170	194170	194170	194170	1	1	388340	388340	12347200	388340	388340	388340	388340	388340	388340	2	2	0	0	3	0	0	0	0	0	0	0	0	100	0	0	0	0	0	0	AFCat1
A0A0A0MQA5;P68368;A0A087WQS4;A0A087WRB4;A0A087WSB0;A0A087WSL5 [Tubulin alpha-4A chain ...]	0	582510	28332900	168922000	6151870	13681800	21420000	582510	582510	582510	8	20	582510	17441500	161087000	5330240	12307400	15612800	582510	8706920	582510	8	20	2	7	13	3	6	9	0	2	0	4.761904762	16.66666667	30.95238095	7.142857143	14.28571429	21.42857143	0	4.761904762	0	AFCat1
A0A0A0MQG2;Q62261 [Spectrin beta chain, non-erythrocytic 1 ...]	0	388340	388340	7173900	388340	388340	388340	388340	388340	388340	2	2	388340	388340	7364500	388340	388340	388340	388340	388340	388340	2	2	0	0	4	0	0	0	0	0	0	0	0	100	0	0	0	0	0	0	AFCat1
A0A0A0MQM0;P63242;Q8BGY2;J3QPS8 [Eukaryotic translation initiation factor 5A;Eukary ...]	0	582510	9437170	41274170	582510	582510	582510	582510	582510	582510	3	4	194170	194170	10744000	194170	194170	194170	194170	194170	194170	1	1	0	2	3	0	0	0	0	0	0	0	40	60	0	0	0	0	0	0	AFCat1
A0A0A6YW67;E9Q9J0;E9Q4P0;E9Q5F6;E9QNP0;Q5SX22;P62984;P62983;P0CG49;P0CG50 [Ubiquitin-60S ribosomal protein L40;Ubiquitin;60S ...]	0	4633840	28251700	117447170	9404940	31249170	50661570	3377340	11975270	1980940	3	15	4503540	24228900	102723170	10307140	31904970	42063340	3488140	15989470	2029740	3	14	6	6	4	2	4	3	2	4	2	18.18181818	18.18181818	12.12121212	6.060606061	12.12121212	9.090909091	6.060606061	12.12121212	6.060606061	AFCat1
A0A0A6YW77;P11672 [Neutrophil gelatinase-associated lipocalin ...]	0	582510	22376470	55671170	582510	14138340	582510	582510	582510	582510	4	5	582510	16846340	134184000	582510	582510	582510	582510	582510	582510	3	4	0	3	5	0	1	0	0	0	0	0	33.33333333	55.55555556	0	11.11111111	0	0	0	0	AFCat1
A0A0A6YY34;A0A0A6YVV2;P11352 [Glutathione peroxidase;Glutathione peroxidase 1 ...]	0	582510	9369500	43602000	582510	582510	582510	582510	582510	582510	3	6	582510	6085470	37309000	582510	582510	582510	582510	582510	582510	3	5	0	5	6	0	0	0	0	0	0	0	45.45454545	54.54545455	0	0	0	0	0	0	AFCat1
A0A0G2JEU1;P47738;A0A0G2JF60;A0A0G2JFQ0;D3YYF3;Q62148;G3UWP3;P24549;Q9JHW9;Q9CZS1 [Aldehyde dehydrogenase, mitochondrial ...]	0	582510	17006300	84207000	985960	2632340	582510	582510	582510	582510	10	16	582510	16232100	93944000	582510	7009470	582510	582510	582510	582510	8	14	0	12	14	1	3	0	0	0	0	0	40	46.66666667	3.333333333	10	0	0	0	0	AFCat1
A0A0G2JFQ3;D3YZT0;D3Z629;S4R1R7;A0A0G2JES3;A0A140T8T4;P51410 [60S ribosomal protein L9 ...]	0	194170	194170	7156700	194170	194170	194170	194170	194170	194170	1	1	194170	194170	7394300	194170	194170	194170	194170	194170	194170	1	1	0	0	2	0	0	0	0	0	0	0	0	100	0	0	0	0	0	0	AFCat1
A0A0G2JGD2;P07091 [Protein S100-A4 ...]	0	194170	194170	3078100	194170	194170	194170	194170	194170	194170	1	1	194170	194170	4395300	194170	194170	194170	194170	194170	194170	1	1	0	0	2	0	0	0	0	0	0	0	0	100	0	0	0	0	0	0	AFCat1
A0A0G2JGX3;Q9CQQ7 [ATP synthase F(0) complex subunit B1, mitochondria ...]	0	194170	194170	3190900	194170	194170	194170	194170	194170	194170	1	1	388340	388340	2793970	388340	388340	388340	388340	1012210	388340	2	2	1	0	2	0	0	0	0	1	0	25	0	50	0	0	0	0	25	0	AFCat1
A0A0J9YUE9;Q3T9X3;A0A0J9YUN4;Q3TCR7;G3X9G4;F8WIV5;P39053;P39054;G3UZZ3;D6RH60;G3UY64;G3UXX2;E9QLL2;Q8BZ98 [Dynamin-1;Dynamin-2 ...]	0	388340	388340	10390700	388340	388340	388340	388340	388340	388340	2	2	388340	388340	6399870	388340	388340	1069320	388340	388340	388340	2	2	0	0	3	0	0	1	0	0	0	0	0	75	0	0	25	0	0	0	AFCat1
A0A0J9YUZ4;P63158;A0A0J9YUD8;D3YVC6;D3YZ18 [High mobility group protein B1 ...]	0	582510	14320900	72419700	582510	582510	582510	582510	582510	582510	4	6	582510	10899870	88060600	582510	582510	582510	582510	582510	582510	4	6	0	5	7	0	0	0	0	0	0	0	41.66666667	58.33333333	0	0	0	0	0	0	AFCat1
A0A0N4SV66;Q8CGP4;C0HKE9;C0HKE8;C0HKE7;C0HKE6;C0HKE5;C0HKE4;C0HKE3;C0HKE2;C0HKE1;Q8CGP6;Q8R1M2;Q8CGP7;Q8CGP5;Q8BFU2;Q64523;Q6GSS7;P27661;Q64522;G3UWL7 [Histone H2A;Histone H2A type 1-H;Histone H2A.J;His ...]	0	582510	743171000	2178599000	83590900	188643170	122369200	582510	72195070	26568460	6	22	26240340	720935000	2213500000	84609100	173091170	120131400	14705340	44261340	25629340	6	22	4	8	11	6	4	7	1	3	3	8.510638298	17.0212766	23.40425532	12.76595745	8.510638298	14.89361702	2.127659574	6.382978723	6.382978723	AFCat1
A0A0N4SVB8;F6QKK2;Q9CQW2;Q8VEH3 [ADP-ribosylation factor-like protein 8B;ADP-ribosy ...]	0	194170	194170	5073900	194170	194170	194170	194170	194170	194170	1	1	388340	1508070	5403970	388340	388340	388340	388340	388340	388340	2	2	0	1	2	0	0	0	0	0	0	0	33.33333333	66.66666667	0	0	0	0	0	0	AFCat1
A0A0N4SW34;A0A0N4SW07;P50518 [V-type proton ATPase subunit E 1 ...]	0	194170	194170	6139700	194170	194170	194170	194170	194170	194170	1	1	194170	194170	6717900	194170	194170	194170	194170	194170	194170	1	1	0	0	2	0	0	0	0	0	0	0	0	100	0	0	0	0	0	0	AFCat1
A0A0R4IZY6;Q61096;F6ZK01 [Myeloblastin ...]	0	582510	8603340	62638200	2575040	11927870	3236650	582510	582510	582510	4	9	582510	11353870	62963300	2391140	10302670	3018370	582510	582510	582510	4	11	0	3	7	2	4	4	0	0	0	0	15	35	10	20	20	0	0	0	AFCat1
A0A0R4J039;Q9ESB3;A0A338P6H8 [Histidine-rich glycoprotein ...]	0	2635640	29030200	30308800	16260700	2327740	13963300	582510	582510	1634940	9	21	14253100	23347500	20882300	14344300	2232340	12900770	2458390	582510	1342180	8	22	5	12	9	6	2	5	2	0	2	11.62790698	27.90697674	20.93023256	13.95348837	4.651162791	11.62790698	4.651162791	0	4.651162791	AFCat1
A0A0R4J043;P28825 [Meprin A subunit alpha ...]	0	852880	4892000	388340	669730	3093570	388340	929340	388340	999230	2	7	793900	4918000	388340	591000	3493970	837180	921450	388340	1082570	2	8	2	4	0	2	2	1	2	0	2	13.33333333	26.66666667	0	13.33333333	13.33333333	6.666666667	13.33333333	0	13.33333333	AFCat1
A0A0R4J083;P51174 [Long-chain specific acyl-CoA dehydrogenase, mitoch ...]	0	582510	2769940	2263040	582510	582510	582510	582510	3511240	582510	3	3	194170	2860300	194170	194170	194170	194170	194170	194170	194170	1	1	1	2	1	0	0	0	0	1	0	20	40	20	0	0	0	0	20	0	AFCat1
A0A0R4J093;Q9DBP5 [UMP-CMP kinase ...]	0	582510	582510	11776670	582510	582510	582510	582510	1439240	582510	3	3	388340	388340	5572370	388340	388340	388340	388340	1302870	388340	2	2	2	0	3	0	0	0	0	2	0	28.57142857	0	42.85714286	0	0	0	0	28.57142857	0	AFCat1
A0A0R4J0B2;Q8VCI0 [Phospholipase B-like 1;Phospholipase B-like 1 chai ...]	0	388340	388340	12823900	388340	388340	388340	388340	388340	388340	2	2	388340	388340	11557300	388340	388340	388340	388340	388340	388340	2	2	0	0	4	0	0	0	0	0	0	0	0	100	0	0	0	0	0	0	AFCat1
A0A0R4J0I1;P07759;Q80X76 [Serine protease inhibitor A3K ...]	0	117597000	260865000	478643000	42515470	11412340	21010100	5730540	5176770	2394240	11	34	124110000	265526000	496380000	59464300	39810000	16007200	14346340	4801270	2395340	11	35	16	19	15	5	4	6	2	4	2	21.91780822	26.02739726	20.54794521	6.849315068	5.479452055	8.219178082	2.739726027	5.479452055	2.739726027	AFCat1
A0A0R4J0R1;O70404;A0A0U1RPE8 [Vesicle-associated membrane protein 8 ...]	0	582510	3397770	13936200	582510	582510	582510	582510	582510	582510	3	5	388340	1749270	7699400	388340	388340	388340	388340	388340	388340	2	3	0	3	5	0	0	0	0	0	0	0	37.5	62.5	0	0	0	0	0	0	AFCat1
A0A0R4J0S8;Q80YF6 [Uroplakin-3b ...]	0	388340	2975870	388340	388340	388340	2080770	388340	388340	388340	2	2	194170	2192000	194170	194170	194170	194170	194170	194170	194170	1	1	0	2	0	0	0	1	0	0	0	0	66.66666667	0	0	0	33.33333333	0	0	0	AFCat1
A0A0R4J0X5;A0A0A0MQA3;Q00896;P07758 [Alpha-1-antitrypsin 1-3;Alpha-1-antitrypsin 1-1 ...]	0	644513000	877830000	1187780000	425395000	215739000	154759000	148309000	38589900	89722300	8	45	718240000	850740000	856560000	400057000	212360000	154104000	151475000	39814100	94038000	8	42	21	14	13	9	6	9	9	8	6	22.10526316	14.73684211	13.68421053	9.473684211	6.315789474	9.473684211	9.473684211	8.421052632	6.315789474	AFCat1
A0A0R4J1C2;A0A0R4IZW8;O88456;Q9D7J7 [Calpain small subunit 1;Calpain small subunit 2 ...]	0	194170	194170	194170	194170	986410	1297200	194170	973700	194170	1	3	388340	388340	6959270	803280	1208470	1368370	388340	1129710	388340	2	5	2	0	1	1	2	2	0	2	0	20	0	10	10	20	20	0	20	0	AFCat1
A0A0R4J2B2;Q6WVG3;Q8C7J6 [BTB/POZ domain-containing protein KCTD12 ...]	0	194170	194170	9384200	194170	194170	194170	194170	194170	194170	1	1	194170	194170	2501400	194170	194170	194170	194170	194170	194170	1	1	0	0	2	0	0	0	0	0	0	0	0	100	0	0	0	0	0	0	AFCat1
A0A0U1RNJ1;P19096 [Fatty acid synthase;[Acyl-carrier-protein] S-acety ...]	0	582510	582510	582510	582510	582510	2044800	582510	1093180	582510	3	3	582510	582510	582510	582510	582510	4213200	582510	1303320	582510	4	4	2	0	0	0	0	5	0	2	0	22.22222222	0	0	0	0	55.55555556	0	22.22222222	0	AFCat1
A0A0U1RNR3;A0A0U1RNK9;A0A0U1RNP5;A0A0N4SVE0;Q9DCW4 [Electron transfer flavoprotein subunit beta ...]	0	194170	194170	194170	194170	194170	782450	194170	1168100	194170	1	2	194170	194170	194170	194170	194170	796460	194170	194170	194170	1	1	1	0	0	0	0	2	0	1	0	25	0	0	0	0	50	0	25	0	AFCat1
A0A1B0GR11;Q93092 [Transaldolase ...]	0	582510	23528500	84561000	1484540	3214240	7426900	582510	1322100	582510	7	17	582510	13710200	89272000	582510	3388340	582510	582510	2844140	582510	7	12	2	10	11	1	2	3	0	2	0	6.451612903	32.25806452	35.48387097	3.225806452	6.451612903	9.677419355	0	6.451612903	0	AFCat1
A0A1B0GR41;A0A1C7CYU3;Q02819 [Nucleobindin-1 ...]	0	194170	194170	194170	194170	194170	194170	194170	409510	194170	1	1	194170	194170	194170	194170	194170	194170	194170	439690	194170	1	1	2	0	0	0	0	0	0	2	0	50	0	0	0	0	0	0	50	0	AFCat1
A0A1B0GRR3;P62281;A0A1B0GSE8 [40S ribosomal protein S11 ...]	0	388340	388340	5884500	388340	388340	388340	388340	388340	388340	2	2	194170	194170	194170	194170	194170	1341400	194170	194170	194170	1	1	0	0	2	0	0	1	0	0	0	0	0	66.66666667	0	0	33.33333333	0	0	0	AFCat1
A0A1B0GS70;Q9R1P4 [Proteasome subunit alpha type-1 ...]	0	388340	2653670	8545670	388340	388340	388340	388340	388340	388340	2	2	388340	388340	8478170	388340	388340	388340	388340	2425970	388340	2	2	1	1	2	0	0	0	0	1	0	20	20	40	0	0	0	0	20	0	AFCat1
A0A1B0GSB2;P19253;A0A1B0GQW6;A0A1B0GSL5;A0A1B0GSC2;A0A1B0GRH1;A0A1B0GSF0;A0A1B0GSQ6;A0A1B0GTA1;A0A1B0GS68 [60S ribosomal protein L13a ...]	0	388340	388340	4172570	388340	388340	388340	388340	1000820	388340	2	2	194170	194170	4235700	194170	194170	194170	194170	194170	194170	1	1	1	0	2	0	0	0	0	1	0	25	0	50	0	0	0	0	25	0	AFCat1
A0A1B0GSG5;Q91VI7;A0A1B0GRG4 [Ribonuclease inhibitor ...]	0	582510	4292300	22501900	1227040	582510	4870170	582510	3451670	582510	4	11	582510	5049400	13393670	1153340	582510	6032170	582510	4326600	582510	4	11	5	6	5	2	0	4	0	5	0	18.51851852	22.22222222	18.51851852	7.407407407	0	14.81481481	0	18.51851852	0	AFCat1
A0A1B0GSR9;A0A1B0GSX0;P06151;A0A1B0GSL7;A0A1B0GT41;A0A1B0GQX5;D3YZQ9;A0A1B0GRW9;A0A1B0GS79;A0A1B0GRC1;A0A1B0GRS2;A0A1B0GSR2;D3YVR7;D3YZE4;A0A1B0GRE9;P00342 [L-lactate dehydrogenase A chain;L-lactate dehydrog ...]	0	6276470	25659100	231724000	6182670	20988600	40104300	1762740	14660900	2362140	7	28	6281770	24579500	235378000	10599600	16907100	26830770	1776340	9886570	3696770	6	25	10	10	11	5	6	6	2	6	3	16.94915254	16.94915254	18.6440678	8.474576271	10.16949153	10.16949153	3.389830508	10.16949153	5.084745763	AFCat1
A0A1D5RLV1;A0A571BEG4;A2A839;A2A838;A2AD32;A2A842;A2A841;P48193 [Protein 4.1 ...]	0	194170	194170	5277000	194170	194170	194170	194170	194170	194170	1	1	194170	194170	5335400	194170	194170	194170	194170	194170	194170	1	1	0	0	2	0	0	0	0	0	0	0	0	100	0	0	0	0	0	0	AFCat1
A0A1L1SQA8;P62852 [40S ribosomal protein S25 ...]	0	1464270	5055170	26515400	1830670	1695570	7713970	388340	3208070	641700	2	9	2066940	3979240	26206670	2297940	1956940	5041540	582510	5675870	582510	3	9	5	2	4	2	2	2	0	3	1	23.80952381	9.523809524	19.04761905	9.523809524	9.523809524	9.523809524	0	14.28571429	4.761904762	AFCat1
A0A1L1STC6;Q6ZWR6;A0A1L1SRV6 [Nesprin-1 ...]	0	194170	194170	5789300	194170	194170	2049200	194170	194170	194170	1	2	194170	194170	2607500	194170	194170	194170	194170	194170	194170	1	1	0	0	2	0	0	1	0	0	0	0	0	66.66666667	0	0	33.33333333	0	0	0	AFCat1
A0A1L1STN8;P37804 [Transgelin ...]	0	194170	2115000	194170	194170	194170	194170	194170	194170	194170	1	1	388340	3940900	388340	388340	388340	388340	388340	388340	388340	2	2	0	3	0	0	0	0	0	0	0	0	100	0	0	0	0	0	0	0	AFCat1
A0A1L1SU53;Q9Z0P5;A0A087WRG4;A0A1L1STC8 [Twinfilin-2 ...]	0	582510	2931840	32428770	582510	582510	582510	582510	582510	582510	3	3	582510	3084940	31639070	582510	582510	582510	582510	582510	582510	3	3	0	2	4	0	0	0	0	0	0	0	33.33333333	66.66666667	0	0	0	0	0	0	AFCat1
A0A1L1SUU4;Q9ERN0 [Secretory carrier-associated membrane protein 2 ...]	0	194170	1353300	194170	194170	194170	194170	194170	194170	194170	1	1	194170	1899500	194170	194170	194170	194170	194170	194170	194170	1	1	0	2	0	0	0	0	0	0	0	0	100	0	0	0	0	0	0	0	AFCat1
A0A1L1SV25;P57780;E9Q2W9;D3Z761;D3Z0L8;A0A1L1SVJ6;Q91ZE6;E9PX29 [Alpha-actinin-4 ...]	0	582510	1534440	41902900	582510	582510	582510	582510	1177090	582510	3	5	582510	582510	61647000	582510	582510	1163870	582510	582510	582510	9	9	1	1	11	0	0	1	0	1	0	6.666666667	6.666666667	73.33333333	0	0	6.666666667	0	6.666666667	0	AFCat1
A0A1W2P6F6;A0A1W2P7Q9;Q60605;A0A1W2P6G5 [Myosin light polypeptide 6 ...]	0	1047120	15303000	82326000	388340	388340	1752270	388340	388340	388340	2	6	388340	17491000	29750170	388340	388340	388340	388340	388340	388340	2	3	1	4	3	0	0	1	0	0	0	11.11111111	44.44444444	33.33333333	0	0	11.11111111	0	0	0	AFCat1
A0A1W2P720;A0A1W2P869;A0A1W2P6N3;Q99JZ4;Q9CQC9;P36536 [GTP-binding protein SAR1b;GTP-binding protein SAR1 ...]	0	194170	194170	194170	194170	194170	1476100	194170	1150700	194170	1	2	194170	194170	11925000	194170	194170	194170	194170	194170	194170	1	1	1	0	1	0	0	1	0	1	0	25	0	25	0	0	25	0	25	0	AFCat1
A0A1W2P768;P84228;P68433;F8WI35;P84244;P02301;E0CZ27;E0CYN1;E0CYR7 [Histone H3.2;Histone H3.1;Histone H3;Histone H3.3; ...]	0	23398340	451758000	1930050000	65338170	153234170	103843300	582510	55165170	14067340	6	22	22886340	427752000	1788430000	70954170	175543000	115174000	582510	40511340	15251340	8	24	5	10	13	4	5	7	0	3	2	10.20408163	20.40816327	26.53061224	8.163265306	10.20408163	14.28571429	0	6.12244898	4.081632653	AFCat1
A0A1W2P7X3;Q561M1;Q9D358 [Low molecular weight phosphotyrosine protein phosp ...]	0	194170	194170	6211200	194170	1140400	194170	194170	194170	194170	1	2	194170	194170	5693100	194170	194170	969190	194170	194170	194170	1	2	0	0	2	0	1	1	0	0	0	0	0	50	0	25	25	0	0	0	AFCat1
A0A1W2P7Z3;P61089 [Ubiquitin-conjugating enzyme E2 N ...]	0	194170	3809800	5771500	194170	2305700	2135800	194170	194170	194170	1	4	194170	2996200	194170	194170	2792200	194170	194170	194170	194170	1	2	0	2	1	0	2	1	0	0	0	0	33.33333333	16.66666667	0	33.33333333	16.66666667	0	0	0	AFCat1
A0A1Y7VLY5;A0A1Y7VKA0;A0A1Y7VKC6;Q9DB29 [Isoamyl acetate-hydrolyzing esterase 1 homolog ...]	0	194170	194170	194170	194170	194170	1243600	194170	498810	194170	1	2	388340	388340	388340	388340	388340	2851700	388340	764260	388340	2	3	2	0	0	0	0	3	0	2	0	28.57142857	0	0	0	0	42.85714286	0	28.57142857	0	AFCat1
A0A286YCZ3;E9Q390;A0A286YDF5;Q69ZN7;A0A286YE65 [Myoferlin ...]	0	582510	582510	582510	582510	582510	582510	582510	3650810	582510	3	3	582510	582510	3692440	582510	582510	582510	582510	3375430	582510	3	3	5	0	1	0	0	0	0	5	0	45.45454545	0	9.090909091	0	0	0	0	45.45454545	0	AFCat1
A0A286YDW8;Q99JI4 [26S proteasome non-ATPase regulatory subunit 6 ...]	0	388340	388340	10481800	388340	388340	388340	388340	388340	388340	2	2	388340	388340	10970300	388340	388340	388340	388340	388340	388340	2	2	0	0	4	0	0	0	0	0	0	0	0	100	0	0	0	0	0	0	AFCat1
A0A2C9F2D2;Q07076;A0A286YCW4 [Annexin A7 ...]	0	582510	582510	10513570	582510	1695440	2116440	582510	1294040	582510	4	5	582510	582510	10107570	582510	1758440	1424040	582510	2794870	582510	5	7	4	0	4	0	2	2	0	4	0	25	0	25	0	12.5	12.5	0	25	0	AFCat1
A0A2I3BPH9;A0A2I3BRN5;Q921M7 [Protein FAM49B ...]	0	194170	194170	2866800	194170	194170	194170	194170	194170	194170	1	1	194170	3055800	194170	194170	194170	194170	194170	194170	194170	1	1	0	1	1	0	0	0	0	0	0	0	50	50	0	0	0	0	0	0	AFCat1
A0A2K6EDJ7;E9Q5L2;E9PVD2;A6X935;CON__Q3T052 [Inter alpha-trypsin inhibitor, heavy chain 4 ...]	0	11484300	31288900	46836000	12924600	12946300	4707000	6923800	582510	1894740	12	34	14034300	29872200	43723000	14231600	8485500	2115640	6614600	582510	1847040	13	37	10	15	15	10	8	4	7	0	2	14.08450704	21.12676056	21.12676056	14.08450704	11.26760563	5.633802817	9.85915493	0	2.816901408	AFCat1
A0A2R8VHF9;E9QPE7;A0A338P6K2;O08638 [Myosin-11 ...]	0	1239250	6284740	45201700	582510	1830940	3127500	582510	1199640	582510	6	11	582510	11735600	45121000	1145910	582510	2631540	582510	1250110	582510	7	12	3	4	11	1	1	3	0	2	0	12	16	44	4	4	12	0	8	0	AFCat1
A0A2R8VHP3;Q6IFZ8;D3Z6R0 [ ...]	0	27134970	5883540	22069170	22632570	27487570	14160270	4738240	582510	8293370	6	15	10389340	90959600	17156670	12072200	28002870	2862440	18522970	582510	6155940	7	16	3	5	4	5	4	4	3	0	3	9.677419355	16.12903226	12.90322581	16.12903226	12.90322581	12.90322581	9.677419355	0	9.677419355	AFCat1
A0A338P684;P48758 [Carbonyl reductase [NADPH] 1 ...]	0	582510	582510	582510	582510	582510	3715570	582510	2420970	582510	3	4	388340	388340	388340	388340	388340	1405570	388340	1417770	388340	2	2	3	0	0	0	0	3	0	3	0	33.33333333	0	0	0	0	33.33333333	0	33.33333333	0	AFCat1
A0A338P742;A0A338P6Y7;Q9D7G4 [Protein EURL homolog ...]	0	194170	266320	194170	194170	194170	194170	194170	194170	194170	1	1	194170	219680	194170	194170	194170	194170	194170	194170	194170	1	1	0	2	0	0	0	0	0	0	0	0	100	0	0	0	0	0	0	0	AFCat1
A0A338P7C0;O09061 [Proteasome subunit beta type-1 ...]	0	388340	388340	5151770	388340	969260	4600700	388340	388340	388340	2	4	388340	388340	12885600	388340	388340	1841670	388340	388340	388340	2	3	0	0	3	0	1	3	0	0	0	0	0	42.85714286	0	14.28571429	42.85714286	0	0	0	AFCat1
A0A3B2WCD8;Q3U0V1;A0A3B2W465 [Far upstream element-binding protein 2 ...]	0	388340	388340	6972570	388340	388340	946850	388340	388340	388340	2	2	194170	194170	5815700	194170	194170	194170	194170	194170	194170	1	1	0	0	2	0	0	1	0	0	0	0	0	66.66666667	0	0	33.33333333	0	0	0	AFCat1
A0A3Q4EH04;A0A3Q4L335;A0A3Q4L393;Q8BL97 [Serine/arginine-rich splicing factor 7 ...]	0	388340	388340	7101270	388340	1062030	388340	388340	388340	388340	2	2	388340	1176560	7815370	388340	941700	388340	388340	388340	388340	2	3	0	1	2	0	2	0	0	0	0	0	20	40	0	40	0	0	0	0	AFCat1
A0A494B9W3;Q8K1B8;A0A494BBJ8;A0A494B9F7 [Fermitin family homolog 3 ...]	0	388340	388340	13518800	388340	1600570	388340	388340	388340	388340	2	3	582510	2540040	13790470	582510	1820840	582510	582510	582510	582510	3	4	0	1	4	0	2	0	0	0	0	0	14.28571429	57.14285714	0	28.57142857	0	0	0	0	AFCat1
A0A494B9Z0;A0A494BBA8;Q642K5;P62862 [40S ribosomal protein S30 ...]	0	194170	1516200	4858200	194170	1450400	194170	194170	980230	194170	1	4	194170	194170	194170	194170	1192100	194170	194170	942400	194170	1	2	2	1	1	0	2	0	0	2	0	25	12.5	12.5	0	25	0	0	25	0	AFCat1
A0A494BA30;Q8BMJ2 [Leucine--tRNA ligase, cytoplasmic ...]	0	5810900	194170	194170	194170	194170	194170	194170	194170	194170	1	1	5099500	194170	194170	194170	194170	194170	194170	194170	194170	1	1	2	0	0	0	0	0	0	0	0	100	0	0	0	0	0	0	0	0	AFCat1
A0A494BA97;Q62422;A0A494B943 [Osteoclast-stimulating factor 1 ...]	0	388340	6740370	27426000	388340	388340	388340	388340	388340	388340	2	3	194170	6279500	11579000	194170	194170	194170	194170	194170	194170	1	2	0	2	3	0	0	0	0	0	0	0	40	60	0	0	0	0	0	0	AFCat1
A0A494BBB0;O35350 [Calpain-1 catalytic subunit ...]	0	582510	582510	20457900	582510	582510	5120600	582510	2154940	582510	5	7	582510	582510	19290400	582510	1579650	3628870	582510	2268640	582510	5	8	2	0	6	0	2	5	0	2	0	11.76470588	0	35.29411765	0	11.76470588	29.41176471	0	11.76470588	0	AFCat1
A0A494BBE3;G3X8R0;Q60870 [Receptor expression-enhancing protein;Receptor exp ...]	0	194170	194170	194170	194170	194170	194170	194170	1168500	194170	1	1	194170	194170	194170	194170	194170	2067700	194170	194170	194170	1	1	1	0	0	0	0	1	0	1	0	33.33333333	0	0	0	0	33.33333333	0	33.33333333	0	AFCat1
A0A571BEL9;P80317;Q61390 [T-complex protein 1 subunit zeta ...]	0	582510	582510	10723170	582510	837630	2630420	582510	582510	582510	4	5	582510	20783340	13219600	582510	868380	582510	582510	582510	582510	3	5	0	1	5	0	2	2	0	0	0	0	10	50	0	20	20	0	0	0	AFCat1
A1BN54;Q7TPR4 [Alpha-actinin-1 ...]	0	582510	7542170	63257000	582510	582510	582510	582510	582510	582510	10	12	582510	5193770	74719000	582510	582510	582510	582510	582510	582510	14	15	0	4	23	0	0	0	0	0	0	0	14.81481481	85.18518519	0	0	0	0	0	0	AFCat1
A2A513;CON__P02535-1;P02535 [Keratin, type I cytoskeletal 10 ...]	0	51353800	160492000	58416000	11065870	158536100	24086500	9570840	7874040	13351340	9	27	35368340	189152000	67475000	3237140	155877100	18323270	35288170	10602340	13202340	10	23	6	13	12	3	6	5	3	2	2	11.53846154	25	23.07692308	5.769230769	11.53846154	9.615384615	5.769230769	3.846153846	3.846153846	AFCat1
A2A817;A2A816;A2A815;A2A813;Q99LX0 [Protein deglycase DJ-1 ...]	0	194170	194170	3902900	194170	1087500	194170	194170	194170	194170	1	2	388340	388340	388340	388340	1368570	388340	388340	1950170	388340	2	2	1	0	1	0	2	0	0	1	0	20	0	20	0	40	0	0	20	0	AFCat1
A2AB60;A0A1W2P6X3;Q9JL26 [Formin-like protein 1 ...]	0	194170	194170	3099300	194170	194170	194170	194170	194170	194170	1	1	388340	388340	6142700	388340	388340	388340	388340	388340	388340	2	2	0	0	3	0	0	0	0	0	0	0	0	100	0	0	0	0	0	0	AFCat1
A2AE89;P10649;F6WHQ7;P19639;D3YVP6;E9QAC8;D3YVP5;Q80W21;F6Y363;D3YZ29;D3YVP8;G5E8M7;O35660;D3YVP9;E9PV63;E9PVM7;P48774 [Glutathione S-transferase Mu 1 ...]	0	101695000	172207000	161728000	130116000	200207000	531100000	67952900	631020000	108394000	17	65	93452000	154424000	180637000	134290000	177672000	570460000	57179170	628440000	106176000	16	62	44	17	15	11	11	15	5	28	9	28.38709677	10.96774194	9.677419355	7.096774194	7.096774194	9.677419355	3.225806452	18.06451613	5.806451613	AFCat1
A2AE91;Q8R5I6 [ ...]	0	46354340	63774340	52945170	76008340	73938340	259732670	35429340	247560770	54119340	3	12	49984340	65332340	57354170	75819340	75330340	255308340	33840340	250294870	53620340	3	11	6	2	4	2	2	3	2	4	2	22.22222222	7.407407407	14.81481481	7.407407407	7.407407407	11.11111111	7.407407407	14.81481481	7.407407407	AFCat1
A2AH25;Q5FWK3 [Rho GTPase-activating protein 1 ...]	0	388340	388340	5525370	388340	388340	959480	388340	388340	388340	2	2	582510	1446140	9701470	582510	582510	1082860	582510	821600	582510	3	5	1	1	3	0	0	2	0	1	0	12.5	12.5	37.5	0	0	25	0	12.5	0	AFCat1
A2AKN8;E9PVW0;B8JI96;A2BIN0;P11591 [ ...]	0	295015000	2201690000	63007300	279788000	360515000	268593000	215299000	29885900	170191000	12	56	349290000	1687050000	65812000	264213000	414078000	257301000	205975000	18387800	168933000	13	58	23	24	7	13	14	11	12	8	10	18.85245902	19.67213115	5.737704918	10.6557377	11.47540984	9.016393443	9.836065574	6.557377049	8.196721311	AFCat1
A2AKV1;A2AKV2;A2AKV3;Q8C2Q8;A2AKU9;Q91VR2;A2AKV0 [ATP synthase subunit gamma;ATP synthase subunit ga ...]	0	388340	388340	9480900	388340	388340	388340	388340	966800	388340	2	3	582510	582510	12693200	582510	582510	582510	582510	1172850	582510	3	4	2	0	5	0	0	0	0	2	0	22.22222222	0	55.55555556	0	0	0	0	22.22222222	0	AFCat1
A2AL12;Q8BG05 [Heterogeneous nuclear ribonucleoprotein A3 ...]	0	194170	194170	16831000	194170	194170	194170	194170	194170	194170	1	1	194170	3251800	194170	194170	194170	194170	194170	194170	194170	1	1	0	1	1	0	0	0	0	0	0	0	50	50	0	0	0	0	0	0	AFCat1
A2BIN1;Q4FZE8;A2AKN9;A2BIM8;P02762;P04938;A9C497;A9C496 [Major urinary protein 6;Major urinary proteins 11 ...]	0	422330000	2721770000	95363000	279788000	360515000	268593000	215299000	43324000	170191000	12	64	445290000	2433380000	97185300	264213000	414078000	257301000	205975000	35360100	168933000	12	67	30	23	9	15	16	12	14	10	12	21.27659574	16.31205674	6.382978723	10.63829787	11.34751773	8.510638298	9.929078014	7.092198582	8.510638298	AFCat1
A2CEK3;Q9D0F9 [Phosphoglucomutase-1 ...]	0	388340	388340	2783970	780820	1222470	5148700	388340	388340	388340	2	5	194170	194170	194170	671050	194170	194170	194170	194170	194170	1	1	0	0	1	2	1	2	0	0	0	0	0	16.66666667	33.33333333	16.66666667	33.33333333	0	0	0	AFCat1
A2CEK6;B5X0G2;L7N222 [Major urinary protein 17 ...]	0	295015000	1790710000	59288170	231107000	263936000	154020000	100587200	13306700	54605000	10	40	305371000	1311420000	65812000	218061000	270494000	133582800	151190600	13005970	55160300	10	42	16	20	5	10	10	7	8	5	6	18.3908046	22.98850575	5.747126437	11.49425287	11.49425287	8.045977011	9.195402299	5.747126437	6.896551724	AFCat1
A2CEK7 [ ...]	0	295015000	2201690000	63007300	279788000	360515000	268593000	215299000	29885900	170191000	12	58	349290000	1728490000	65812000	264213000	414078000	257301000	205975000	18387800	168933000	13	61	26	24	7	13	16	11	12	8	10	20.47244094	18.8976378	5.511811024	10.23622047	12.5984252	8.661417323	9.448818898	6.299212598	7.874015748	AFCat1
A3KGU5;A3KGU7;E9Q447;A3KGU9;P16546 [Spectrin alpha chain, non-erythrocytic 1 ...]	0	388340	388340	6684900	388340	388340	388340	388340	388340	388340	2	2	582510	582510	10710200	582510	582510	582510	582510	582510	582510	4	4	0	0	6	0	0	0	0	0	0	0	0	100	0	0	0	0	0	0	AFCat1
A3KMP2 [Tetratricopeptide repeat protein 38 ...]	0	194170	194170	194170	194170	194170	1230100	194170	786990	194170	1	2	194170	194170	194170	194170	194170	1125300	194170	715640	194170	1	2	2	0	0	0	0	2	0	2	0	33.33333333	0	0	0	0	33.33333333	0	33.33333333	0	AFCat1
A6BLY7 [Keratin, type I cytoskeletal 28 ...]	0	19521500	118457500	119754170	200624170	154846200	10647170	273264170	78441170	209834170	2	12	186404170	113299700	139174170	211334170	121631900	273064170	258130900	388340	223324170	2	11	4	4	2	2	4	2	3	1	2	16.66666667	16.66666667	8.333333333	8.333333333	16.66666667	8.333333333	12.5	4.166666667	8.333333333	AFCat1
A6X925;B7ZBY6;B7ZBY7;E9PY39;Q9D2M8;Q9CZY3;B2KF55 [Ubiquitin-conjugating enzyme E2 variant 2;Ubiquiti ...]	0	194170	194170	3030400	194170	194170	194170	194170	194170	194170	1	1	388340	388340	3800670	388340	388340	1507270	388340	388340	388340	2	2	0	0	2	0	0	1	0	0	0	0	0	66.66666667	0	0	33.33333333	0	0	0	AFCat1
A8DUK4;P02088;E9Q223;P02089;CON__Q3SX09;CON__P02070;P02104 [Hemoglobin subunit beta-1 ...]	0	219199000	1174850000	7226500000	199485000	1211810000	63106600	343390000	112444700	26550600	15	66	147814000	1628580000	7335400000	332505000	1832230000	121296000	352739000	131019200	8245370	15	72	24	23	29	15	18	11	13	11	5	16.10738255	15.43624161	19.46308725	10.06711409	12.08053691	7.382550336	8.724832215	7.382550336	3.355704698	AFCat1
A8R0W3 [ ...]	0	194170	194170	194170	194170	194170	9619100	194170	194170	194170	1	1	194170	194170	194170	194170	194170	11048000	194170	194170	194170	1	1	0	0	0	0	0	2	0	0	0	0	0	0	0	0	100	0	0	0	AFCat1
A8XY17;A2A4J8;Q9CQ80 [Vacuolar protein-sorting-associated protein 25 ...]	0	194170	194170	194170	194170	194170	1038000	194170	194170	194170	1	1	194170	194170	194170	194170	194170	1081800	194170	194170	194170	1	1	0	0	0	0	0	2	0	0	0	0	0	0	0	0	100	0	0	0	AFCat1
A9R9W0;A2CEL1;P11588;A2CEL0;L7MUC7;A2CEK9 [Major urinary protein 1 ...]	0	236514000	1457220000	14701470	279788000	360515000	268593000	215299000	27419000	170191000	11	55	294171000	1349540000	20836600	264213000	414078000	257301000	205975000	9891870	168933000	11	53	23	21	5	12	17	11	11	6	8	20.1754386	18.42105263	4.385964912	10.52631579	14.9122807	9.649122807	9.649122807	5.263157895	7.01754386	AFCat1
B1ARA3;P61255;B1ARA5 [60S ribosomal protein L26 ...]	0	582510	582510	13749000	987710	1141370	1856740	582510	840460	582510	3	7	582510	582510	5769540	582510	582510	6149970	582510	582510	582510	3	3	1	0	4	1	1	3	0	1	0	9.090909091	0	36.36363636	9.090909091	9.090909091	27.27272727	0	9.090909091	0	AFCat1
B1ARC0;B1ARB9;S4R1I6;Q8BTS0;Q61656 [Probable ATP-dependent RNA helicase DDX5 ...]	0	194170	194170	6544300	194170	194170	194170	194170	194170	194170	1	1	194170	194170	8283200	194170	194170	194170	194170	194170	194170	1	1	0	0	2	0	0	0	0	0	0	0	0	100	0	0	0	0	0	0	AFCat1
B1AT92;Q60631;B1AT95 [Growth factor receptor-bound protein 2 ...]	0	194170	194170	7353600	194170	194170	194170	194170	194170	194170	1	1	388340	1545470	11587500	388340	388340	388340	388340	388340	388340	2	3	0	1	3	0	0	0	0	0	0	0	25	75	0	0	0	0	0	0	AFCat1
B1AXP0;B1AXN9;E9PWV3;Q505N6;F6RQA2;F6Q8A4;P18653;P18654;F6UG16;B1AXN8;B2GVN8;A2CEE8;B1AXN5;B1B0X1;A0A338P701;G3UZI3;A2CEE6;A2CEE5;E9PUP0;A2CEE7;E9QK39;Q9WUT3;Q7TPS0 [Ribosomal protein S6 kinase;Ribosomal protein S6 k ...]	0	194170	194170	3417300	194170	194170	194170	194170	194170	194170	1	1	388340	388340	6538600	388340	388340	388340	388340	388340	388340	2	2	0	0	3	0	0	0	0	0	0	0	0	100	0	0	0	0	0	0	AFCat1
B1AXW5;B1AXW6;P35700;B1AXW4;B1AZS9;O08807 [Peroxiredoxin-1 ...]	0	582510	8042670	52661170	6302970	7172270	36292000	1452340	17310400	1161080	4	17	4380870	8791770	106593000	3318740	6990970	29151000	1448440	13013770	1123460	6	19	8	4	6	3	4	7	2	6	2	19.04761905	9.523809524	14.28571429	7.142857143	9.523809524	16.66666667	4.761904762	14.28571429	4.761904762	AFCat1
B1B1A8;Q6PDN3 [Myosin light chain kinase, smooth muscle;Myosin li ...]	0	1506700	194170	194170	1743300	194170	194170	194170	194170	194170	1	2	1532870	1137910	388340	1868670	388340	388340	388340	1060710	388340	2	4	3	1	0	2	0	0	0	1	0	42.85714286	14.28571429	0	28.57142857	0	0	0	14.28571429	0	AFCat1
B7FAV1;B7FAU9;Q8BTM8;F6XC15;Q8VHX6;F6Z2C0;J3JS91 [Filamin-A ...]	0	582510	17592100	174623000	582510	13190200	3252140	582510	1784740	582510	25	43	582510	18544800	152543000	2758820	4765940	582510	582510	582510	582510	24	36	1	25	44	2	6	1	0	1	0	1.25	31.25	55	2.5	7.5	1.25	0	1.25	0	AFCat1
B7ZCP7;B7ZCP6;E9Q806;B7ZCP4;Q8C166;V9GWY2;V9GX86;B7ZCP8;B7ZCP5;A3KGK7 [Copine-1 ...]	0	388340	388340	9320200	388340	388340	388340	388340	856400	388340	2	3	582510	2865740	10861570	582510	582510	1757140	582510	582510	582510	3	4	1	1	4	0	0	1	0	1	0	12.5	12.5	50	0	0	12.5	0	12.5	0	AFCat1
B7ZNJ1;A0A087WS56;B9EHT6;A0A087WSN6;Q3UHL6;A0A087WR50;P11276;Q4KL80;A0A087WSU6;A0A087WS99 [Fibronectin;Anastellin ...]	0	18445800	62849000	43736000	10751600	10160700	582510	2121940	582510	582510	18	40	19693500	53666000	46694000	8312500	6178170	1354940	3978800	582510	582510	20	41	15	34	11	9	7	1	4	0	0	18.51851852	41.97530864	13.58024691	11.11111111	8.641975309	1.234567901	4.938271605	0	0	AFCat1
B8JJM5;F6VQX8;B8JJN0;P04186;F6XQ00;B8JJM6;H3BK95;B8JJM3;F6W2T4 [Complement factor B;Complement factor B Ba fragmen ...]	0	9026400	15935100	25223100	4091370	2028040	1550740	582510	582510	582510	7	18	8869600	17265900	25099900	4361470	1918040	1471140	1219690	582510	582510	8	18	9	12	6	4	2	2	1	0	0	25	33.33333333	16.66666667	11.11111111	5.555555556	5.555555556	2.777777778	0	0	AFCat1
B8JK51;Q8K015 [Centromere protein O ...]	0	194170	194170	30729000	194170	194170	194170	194170	194170	194170	1	1	194170	194170	15858000	194170	194170	194170	194170	194170	194170	1	1	0	0	2	0	0	0	0	0	0	0	0	100	0	0	0	0	0	0	AFCat1
CON__A2A4G1;B1AQ77;Q61414;CON__Q99456 [Keratin, type I cytoskeletal 15 ...]	0	67175100	280500000	262024000	39930800	296216000	81034000	22210470	56551900	20625420	17	60	52161000	266590000	244773000	25394000	277236000	77544000	47479300	58583300	20970500	16	60	29	15	25	9	12	16	7	16	7	21.32352941	11.02941176	18.38235294	6.617647059	8.823529412	11.76470588	5.147058824	11.76470588	5.147058824	AFCat1
CON__ENSEMBL:ENSBTAP00000038253 [ ...]	0	251522000	397728000	231075000	194420000	346717000	152739600	228612900	45836170	176057800	9	39	280314000	406772000	243283000	202206000	348084000	195078000	220108800	44049200	174137700	9	39	15	16	7	6	8	9	10	5	7	18.07228916	19.27710843	8.43373494	7.228915663	9.638554217	10.84337349	12.04819277	6.024096386	8.43373494	AFCat1
CON__P00761 [ ...]	0	928184170	1009572000	1595434170	721934170	1161124170	934614170	1051404170	1128164170	1504824170	4	20	619319170	1452813000	1149465170	1056344170	1192474170	674132170	993974170	1160707800	1098885370	4	21	9	8	4	4	4	4	4	5	4	19.56521739	17.39130435	8.695652174	8.695652174	8.695652174	8.695652174	8.695652174	10.86956522	8.695652174	AFCat1
CON__P01966;A7M7S6;P06467 [ ...]	0	201297500	811588000	2835745000	166911170	1053831000	50960340	152144070	150948340	9714140	4	20	198341400	774455000	2694214000	81054340	1064498000	50235340	287922400	180428170	8735440	4	21	9	6	8	3	6	2	5	3	2	20.45454545	13.63636364	18.18181818	6.818181818	13.63636364	4.545454545	11.36363636	6.818181818	4.545454545	AFCat1
CON__P02533;Q61781 [Keratin, type I cytoskeletal 14 ...]	0	67175100	280500000	262024000	38176900	296216000	79455000	26103700	42001370	21050600	16	49	52161000	266590000	244773000	21172770	277236000	77514000	47479300	47986500	25964300	11	41	18	22	8	5	11	6	9	6	11	18.75	22.91666667	8.333333333	5.208333333	11.45833333	6.25	9.375	6.25	11.45833333	AFCat1
CON__P02538;CON__Q8VED5;Q8VED5;CON__Q14CN4-1 [ ...]	0	197814000	349293000	189137000	83082000	195292000	105318200	57099100	27491900	45532500	19	78	225580000	339199000	158369000	42815500	202887000	106232000	73048000	24681800	58154500	20	83	35	26	17	16	20	18	16	9	13	20.58823529	15.29411765	10	9.411764706	11.76470588	10.58823529	9.411764706	5.294117647	7.647058824	AFCat1
CON__P02768-1 [ ...]	0	358661000	472862000	597128000	100989100	18357300	7632380	32874340	3916270	4923470	8	31	316110000	464424000	867800000	100752200	3709940	16680000	40036600	2578940	5206370	10	35	19	13	9	7	4	6	4	3	4	27.53623188	18.84057971	13.04347826	10.14492754	5.797101449	8.695652174	5.797101449	4.347826087	5.797101449	AFCat1
CON__P02769 [ ...]	0	120871000	103840600	239978000	37388270	582510	1282250	47609600	3489740	7891370	17	40	127399000	151622000	168116000	38221370	582510	16174600	50953400	582510	8527170	18	49	28	20	20	4	0	4	9	1	4	31.11111111	22.22222222	22.22222222	4.444444444	0	4.444444444	10	1.111111111	4.444444444	AFCat1
CON__P04264 [ ...]	0	480640000	647420000	406200000	293841000	463500000	312810000	488760000	69838000	418530000	30	157	461510000	5.88E+08	412880000	308343000	465970000	363390000	488030000	95760000	398510000	29	160	60	47	31	32	34	37	43	18	33	17.91044776	14.02985075	9.253731343	9.552238806	10.14925373	11.04477612	12.8358209	5.373134328	9.850746269	AFCat1
CON__P05784;P05784 [Keratin, type I cytoskeletal 18 ...]	0	57799300	135261400	145955170	30572100	122527800	118560000	582510	75558000	5090940	13	38	40701200	141518500	149566000	20725100	122683100	86726000	30628700	74929000	8099890	11	43	29	10	6	7	8	14	3	17	4	29.59183673	10.20408163	6.12244898	7.142857143	8.163265306	14.28571429	3.06122449	17.34693878	4.081632653	AFCat1
CON__P07744;P07744 [Keratin, type II cytoskeletal 4 ...]	0	60360400	58975770	152125000	54982500	97787070	72096970	582510	3632240	582510	17	29	30635670	118718300	125467000	3813240	102719570	62621070	31958170	3687140	19749340	15	28	7	5	30	4	4	4	2	2	1	11.86440678	8.474576271	50.84745763	6.779661017	6.779661017	6.779661017	3.389830508	3.389830508	1.694915254	AFCat1
CON__P08727 [ ...]	0	85668000	178792000	277521000	49477000	154711000	146295000	22210470	96819000	24474600	7	35	59448000	167690000	265624000	34387170	129991400	110284000	47479300	93534000	24962100	8	38	18	9	11	5	7	10	6	10	7	21.68674699	10.84337349	13.25301205	6.024096386	8.43373494	12.04819277	7.228915663	12.04819277	8.43373494	AFCat1
CON__P08730-1;P08730 [Keratin, type I cytoskeletal 13 ...]	0	69549100	165139400	159118000	23018370	129488900	59025000	14105970	10422200	14341170	9	34	62864000	169371100	154418000	582510	123920170	51057000	47955300	23134500	15046500	9	33	16	9	16	2	6	8	5	8	5	21.33333333	12	21.33333333	2.666666667	8	10.66666667	6.666666667	10.66666667	6.666666667	AFCat1
CON__P08779;CON__Q9Z2K1;CON__Q3ZAW8;Q9Z2K1;Q9WTL4 [Keratin, type I cytoskeletal 16 ...]	0	67175100	280500000	262024000	38905800	296216000	79455000	25913900	42001370	26258800	16	55	52161000	266590000	244773000	21172770	281945000	77514000	51447200	47986500	27967800	14	54	22	24	9	6	14	9	11	6	14	19.13043478	20.86956522	7.826086957	5.217391304	12.17391304	7.826086957	9.565217391	5.217391304	12.17391304	AFCat1
CON__P13645;CON__Q7Z3Y7;CON__Q7Z3Z0;CON__Q7Z3Y8;CON__Q148H6;CON__Q2M2I5 [ ...]	0	223107000	480090000	207357000	120116000	334071000	135984000	151912000	42260600	90324000	17	80	194945000	481760000	215574000	102390000	331407000	141808000	141988000	34854800	105751000	18	77	34	27	23	14	17	18	13	13	11	20	15.88235294	13.52941176	8.235294118	10	10.58823529	7.647058824	7.647058824	6.470588235	AFCat1
CON__P13647 [ ...]	0	183111000	301361000	173245000	67801000	136429000	105654000	34759700	19151000	28785200	20	78	191893000	294842000	137023000	15760300	125234000	91238000	43750000	20588800	37305700	20	75	32	26	15	13	21	20	16	10	10	19.63190184	15.95092025	9.202453988	7.975460123	12.88343558	12.26993865	9.81595092	6.134969325	6.134969325	AFCat1
CON__P19001;P19001 [Keratin, type I cytoskeletal 19 ...]	0	85668000	178792000	277521000	49477000	154711000	146295000	22210470	99734000	24474600	17	63	59448000	167690000	265624000	39671000	133233100	110284000	47479300	95680000	24962100	17	68	36	13	25	11	12	18	7	21	9	23.68421053	8.552631579	16.44736842	7.236842105	7.894736842	11.84210526	4.605263158	13.81578947	5.921052632	AFCat1
CON__P19012 [ ...]	0	67175100	175239400	262024000	36923170	154711000	79455000	22210470	48353000	19966170	10	35	52161000	164950100	244773000	20061340	123920170	77514000	47479300	48214800	20970500	9	33	18	9	14	3	5	9	5	10	5	23.07692308	11.53846154	17.94871795	3.846153846	6.41025641	11.53846154	6.41025641	12.82051282	6.41025641	AFCat1
CON__P35527 [ ...]	0	376982000	519300000	237418000	303448000	333021000	302601000	394851000	83315700	549067000	14	90	300092000	424890000	225345000	138593000	481820000	276519000	377611000	78629200	369619000	14	91	35	22	24	21	22	20	19	14	18	17.94871795	11.28205128	12.30769231	10.76923077	11.28205128	10.25641026	9.743589744	7.179487179	9.230769231	AFCat1
CON__P35908 [ ...]	0	151940000	325960000	208270000	116051000	169540000	130459000	166933000	28932100	75379300	20	100	162030000	360799000	218190000	109131000	180100000	123909000	166429000	26641400	75300300	21	103	46	33	18	23	20	26	23	17	14	20.90909091	15	8.181818182	10.45454545	9.090909091	11.81818182	10.45454545	7.727272727	6.363636364	AFCat1
CON__P48668;CON__P04259 [ ...]	0	197814000	349293000	189137000	83082000	195292000	105318200	56424600	27491900	45532500	19	77	225580000	339199000	158369000	42815500	202887000	106232000	73048000	24681800	58154500	20	82	33	26	15	16	20	20	16	9	13	19.64285714	15.47619048	8.928571429	9.523809524	11.9047619	11.9047619	9.523809524	5.357142857	7.738095238	AFCat1
CON__P50446;P50446;Q3UV11;Q9Z331 [Keratin, type II cytoskeletal 6A;Keratin, type II ...]	0	61135800	64276800	103730000	59621400	123861000	82494000	6873270	4387690	11166600	12	42	40975100	127248000	61155000	16506400	129386800	75602900	34868800	3687140	35599600	15	49	17	15	12	10	13	10	7	3	7	18.08510638	15.95744681	12.76595745	10.63829787	13.82978723	10.63829787	7.446808511	3.191489362	7.446808511	AFCat1
CON__Q04695;CON__Q9QWL7;Q9QWL7;CON__Q61782;CON__P35900;CON__Q8N1A0;CON__Q9C075;CON__Q99PS0;Q99PS0 [Keratin, type I cytoskeletal 17 ...]	0	67175100	175239400	262024000	41658000	157284000	79455000	28969800	48695600	19966170	17	47	52161000	164950100	244773000	24436770	137790000	77514000	47479300	48520500	25964300	13	44	23	14	11	5	10	9	12	8	7	23.23232323	14.14141414	11.11111111	5.050505051	10.1010101	9.090909091	12.12121212	8.080808081	7.070707071	AFCat1
CON__Q6IFZ6;Q6IFZ6;CON__Q7Z794 [Keratin, type II cytoskeletal 1b ...]	0	154880800	238861000	83854340	20767770	15550340	14342900	13285770	13352340	6113540	6	18	151698340	255844500	94692870	582510	12413340	23279970	28838800	11000340	5723440	6	17	6	7	3	2	2	7	6	2	2	16.21621622	18.91891892	8.108108108	5.405405405	5.405405405	18.91891892	16.21621622	5.405405405	5.405405405	AFCat1
CON__Q6IME9;Q6IME9 [Keratin, type II cytoskeletal 72 ...]	0	27867970	5657940	4112040	15136340	13616870	7509140	582510	1337960	582510	3	9	1929040	71736170	1252180	5135940	11679170	13564340	18241070	582510	582510	4	10	4	3	2	2	4	2	2	1	0	20	15	10	10	20	10	10	5	0	AFCat1
CON__Q86YZ3 [ ...]	0	21730200	27093170	9179240	582510	5886940	4897140	6880470	582510	2380440	5	12	14116970	29361900	582510	582510	5852540	4916940	7574770	582510	2481640	3	10	6	5	1	0	2	2	4	0	2	27.27272727	22.72727273	4.545454545	0	9.090909091	9.090909091	18.18181818	0	9.090909091	AFCat1
CON__Q922U2;Q922U2 [Keratin, type II cytoskeletal 5 ...]	0	183111000	290661600	173245000	67801000	114529000	127377000	23385600	56684900	11333700	19	68	188555000	294842000	144867000	17428300	116728100	127775000	43952000	53628600	29078300	22	70	30	22	13	15	16	23	12	11	7	20.13422819	14.76510067	8.724832215	10.06711409	10.73825503	15.43624161	8.053691275	7.382550336	4.697986577	AFCat1
CON__Q9D312;Q9D312 [Keratin, type I cytoskeletal 20 ...]	0	19478000	15388870	79471170	582510	12193340	21051100	5117640	9454800	1572340	6	18	19226330	14558070	79842170	2242840	13464340	17894000	4957640	18157300	1555340	7	20	16	4	4	1	2	7	2	9	2	34.04255319	8.510638298	8.510638298	2.127659574	4.255319149	14.89361702	4.255319149	19.14893617	4.255319149	AFCat1
CON__Q9D646;CON__A2A5Y0;Q9D646;Q8K0Y2;Q61765;CON__O76011;CON__Q6NTB9;CON__Q14525;CON__O76009;CON__Q9UE12;CON__Q15323;CON__Q8IUT8;CON__O76014;CON__REFSEQ:XP_986630;Q61897 [Keratin, type I cuticular Ha4;Keratin, type I cuti ...]	0	194170	194170	194170	1062900	194170	194170	194170	194170	194170	1	1	194170	194170	194170	2539700	194170	194170	194170	194170	194170	1	1	0	0	0	2	0	0	0	0	0	0	0	0	100	0	0	0	0	0	AFCat1
CON__Q9DCV7;Q9DCV7;CON__Q3KNV1;CON__P08729;D3Z6N5;CON__Q9NSB2;CON__Q6ISB0;CON__Q6KB66-1;G5E846;A0A2R8W6R6;G3X981;P15331 [Keratin, type II cytoskeletal 7 ...]	0	63627700	67945200	119548000	61031300	109168500	129290000	2567940	66546000	5184900	17	75	42269000	123068000	74584000	23467900	114935100	103525000	33969000	67270000	21193670	17	66	41	19	15	18	15	21	6	22	6	25.15337423	11.65644172	9.202453988	11.04294479	9.202453988	12.88343558	3.680981595	13.49693252	3.680981595	AFCat1
CON__Q9NSB4;Q99M74 [Keratin, type II cuticular Hb2 ...]	0	388340	62793170	388340	1811670	388340	388340	388340	388340	388340	2	2	388340	388340	388340	17254100	388340	388340	388340	388340	388340	2	2	0	1	0	3	0	0	0	0	0	0	25	0	75	0	0	0	0	0	AFCat1
D3YTY9;A0A0R4J038;O08677;D3Z2B2 [Kininogen-1;Kininogen-1 heavy chain;Bradykinin;Kin ...]	0	44144700	114627000	167992000	52066000	27823600	9022170	5065640	2285140	582510	8	28	42795400	115999000	171942000	32269100	21405500	582510	5000340	582510	582510	9	21	9	12	11	7	6	2	2	1	0	18	24	22	14	12	4	4	2	0	AFCat1
D3YVB4;D3Z712;F8WJ41;P62245 [40S ribosomal protein S15a ...]	0	194170	194170	16469000	194170	194170	194170	194170	194170	194170	1	1	388340	388340	15675900	388340	388340	388340	388340	388340	388340	2	2	0	0	3	0	0	0	0	0	0	0	0	100	0	0	0	0	0	0	AFCat1
D3YWF6;Q7TQI3;D3Z7K0 [Ubiquitin thioesterase OTUB1 ...]	0	582510	582510	14635400	582510	582510	582510	582510	582510	582510	3	3	582510	582510	14903900	582510	582510	582510	582510	582510	582510	3	3	0	0	6	0	0	0	0	0	0	0	0	100	0	0	0	0	0	0	AFCat1
D3YWL1;D3YW33;P35276 [Ras-related protein Rab-3D ...]	0	194170	2314500	5799400	194170	194170	194170	194170	194170	194170	1	2	194170	194170	7244100	194170	194170	194170	194170	194170	194170	1	1	0	1	2	0	0	0	0	0	0	0	33.33333333	66.66666667	0	0	0	0	0	0	AFCat1
D3YX76;P15626 [Glutathione S-transferase Mu 2 ...]	0	73984170	63774340	52945170	93590170	73938340	422604170	35429340	316210170	54119340	3	14	75912170	65332340	57354170	92709170	75330340	255308340	33840340	320227300	53620340	4	14	9	2	4	4	2	3	2	5	2	27.27272727	6.060606061	12.12121212	12.12121212	6.060606061	9.090909091	6.060606061	15.15151515	6.060606061	AFCat1
D3YY36;Q9DBD0;F6W4D3 [Inhibitor of carbonic anhydrase ...]	0	54059470	71113300	5253640	30545340	582510	582510	582510	582510	582510	4	7	71520200	8279500	6072240	47329340	1591140	582510	15831340	582510	9759440	4	11	5	6	2	2	1	0	1	0	1	27.77777778	33.33333333	11.11111111	11.11111111	5.555555556	0	5.555555556	0	5.555555556	AFCat1
D3YYH3;D3YUE8;D3Z223;P15327 [Phosphoglycerate mutase;Bisphosphoglycerate mutase ...]	0	194170	194170	194170	194170	3691000	194170	194170	194170	194170	1	1	194170	194170	4623800	194170	3815100	194170	194170	194170	194170	1	2	0	0	1	0	2	0	0	0	0	0	0	33.33333333	0	66.66666667	0	0	0	0	AFCat1
D3Z1A9;D3Z313;Q9DCC5;P23198 [Chromobox protein homolog 3 ...]	0	194170	2064200	194170	194170	194170	194170	194170	194170	194170	1	1	194170	2411000	10252000	194170	194170	194170	194170	194170	194170	1	2	0	2	1	0	0	0	0	0	0	0	66.66666667	33.33333333	0	0	0	0	0	0	AFCat1
D3Z1H8;D3Z1H9;Q9JL62 [Glycolipid transfer protein ...]	0	194170	194170	194170	194170	194170	1743700	194170	194170	194170	1	1	194170	194170	3112500	194170	194170	194170	194170	194170	194170	1	1	0	0	1	0	0	1	0	0	0	0	0	50	0	0	50	0	0	0	AFCat1
D3Z1T4;D3Z1M1;D3YZX3;E9QKR0;P62880;H3BLF7;H3BKR2;P29387;P62874;E9PWM7;Q61011 [Guanine nucleotide-binding protein G(I)/G(S)/G(T) ...]	0	388340	2180670	12474100	388340	388340	388340	388340	388340	388340	2	3	388340	388340	20444300	812450	388340	388340	388340	388340	388340	2	3	0	1	4	1	0	0	0	0	0	0	16.66666667	66.66666667	16.66666667	0	0	0	0	0	AFCat1
D3Z1V4;P70296 [Phosphatidylethanolamine-binding protein 1;Hippoca ...]	0	194170	194170	6755600	1147300	194170	194170	194170	3551700	194170	1	3	194170	1594900	5961300	194170	4041500	194170	194170	3454500	194170	1	4	2	1	2	1	1	0	0	2	0	22.22222222	11.11111111	22.22222222	11.11111111	11.11111111	0	0	22.22222222	0	AFCat1
D3Z1Z8;D3Z5N2;P54227;P55821 [Stathmin;Stathmin-2 ...]	0	388340	388340	10742300	388340	388340	388340	388340	388340	388340	2	2	194170	194170	7367500	194170	194170	194170	194170	194170	194170	1	1	0	0	3	0	0	0	0	0	0	0	0	100	0	0	0	0	0	0	AFCat1
D3Z2H9;E9Q5J9 [ ...]	0	582510	12821400	95100000	582510	582510	582510	582510	582510	582510	8	10	582510	18567100	84834000	582510	1544240	582510	582510	582510	582510	9	14	0	9	14	0	1	0	0	0	0	0	37.5	58.33333333	0	4.166666667	0	0	0	0	AFCat1
D3Z2U2;D3Z637;D3Z125;E9PUA7;D3Z7X7;F8WHQ1;Q62393 [Tumor protein D52 ...]	0	194170	194170	7136200	194170	194170	194170	194170	194170	194170	1	1	194170	194170	7356200	194170	194170	194170	194170	194170	194170	1	1	0	0	2	0	0	0	0	0	0	0	0	100	0	0	0	0	0	0	AFCat1
D3Z4N2;F8WIP8;P10923 [Osteopontin ...]	0	194170	4053200	194170	737460	4835600	1399600	194170	194170	1064800	1	5	194170	194170	194170	194170	194170	194170	1715700	194170	1025500	1	2	0	1	0	1	1	1	1	0	2	0	14.28571429	0	14.28571429	14.28571429	14.28571429	14.28571429	0	28.57142857	AFCat1
D3Z6F5;Q03265;Q831A3 [ATP synthase subunit alpha;ATP synthase subunit al ...]	0	2912640	13905800	79428000	3935870	10840700	8318570	582510	20672200	1177490	9	25	2543740	19089700	86654000	3583370	6715370	8570470	696500	17664300	1271250	10	27	14	10	12	4	5	4	1	12	2	21.875	15.625	18.75	6.25	7.8125	6.25	1.5625	18.75	3.125	AFCat1
D3Z6I8;E9Q7Q3;A0A0R4J1P2;P21107;D3YVR0;A2AIM5;S4R2U0;G5E8R0;E9Q453;G5E8R2;G5E8R1;E9Q456;E9Q455;E9Q452;Q8BSH3;Q8BP43;E9Q450;E9Q448;CON__Q3SX28;B7ZNL3;A2AIM4;E9Q454;F8WID5;P58774;P58771 [Tropomyosin alpha-3 chain ...]	0	582510	12821400	95100000	582510	582510	582510	582510	3042540	582510	8	12	582510	18567100	84834000	582510	1544240	582510	582510	582510	582510	9	14	1	10	14	0	1	0	0	1	0	3.703703704	37.03703704	51.85185185	0	3.703703704	0	0	3.703703704	0	AFCat1
D3Z789;D3Z6Z0;Q78ZM0;O70492 [Sorting nexin-3 ...]	0	194170	194170	194170	194170	194170	194170	194170	1377800	194170	1	1	194170	194170	194170	194170	194170	194170	194170	1504300	194170	1	1	2	0	0	0	0	0	0	2	0	50	0	0	0	0	0	0	50	0	AFCat1
E9PUM5;E9Q8B6;E9Q8B5;Q61405 [ ...]	0	2872270	7505000	388340	388340	1476070	388340	388340	388340	388340	2	4	4561400	3505470	388340	388340	1593070	388340	388340	388340	388340	2	4	3	3	0	0	2	0	0	0	0	37.5	37.5	0	0	25	0	0	0	0	AFCat1
E9PUZ8;P08607 [C4b-binding protein ...]	0	469020	1132400	194170	476360	194170	194170	194170	194170	194170	1	3	450140	1142600	194170	194170	194170	194170	194170	194170	194170	1	2	2	2	0	1	0	0	0	0	0	40	40	0	20	0	0	0	0	0	AFCat1
E9PV24;CON__P02672 [Fibrinogen alpha chain;Fibrinopeptide A;Fibrinogen ...]	0	96649000	260003000	242188000	46387100	132682000	29244400	16609070	582510	9079500	14	45	94761000	254859000	224672000	32865500	135075000	36710000	21810900	582510	8557670	12	46	15	21	15	9	12	9	5	0	5	16.48351648	23.07692308	16.48351648	9.89010989	13.18681319	9.89010989	5.494505495	0	5.494505495	AFCat1
E9PWE9;P48025 [Tyrosine-protein kinase;Tyrosine-protein kinase SY ...]	0	388340	388340	9240400	388340	388340	388340	388340	388340	388340	2	2	388340	388340	8129000	388340	388340	388340	388340	388340	388340	2	2	0	0	4	0	0	0	0	0	0	0	0	100	0	0	0	0	0	0	AFCat1
E9PWU4;Q60994 [Adiponectin ...]	0	5542300	10056200	33159000	1523370	388340	388340	388340	388340	388340	2	7	5371500	6658400	32415000	5513400	388340	388340	853580	388340	388340	2	9	4	4	4	3	0	0	1	0	0	25	25	25	18.75	0	0	6.25	0	0	AFCat1
E9PYF1;Q8VCT3 [Aminopeptidase B ...]	0	582510	582510	22741400	582510	582510	2675740	582510	582510	582510	4	5	388340	388340	11533300	388340	388340	2944570	388340	388340	388340	2	3	0	0	6	0	0	2	0	0	0	0	0	75	0	0	25	0	0	0	AFCat1
E9PZ00;Q8BFQ1;K3W4L3;J3QPG5;Q61207 [Prosaposin ...]	0	582510	7681270	12137000	2366290	582510	2878540	582510	582510	582510	3	8	582510	7337170	8345970	1149640	7250600	582510	582510	582510	582510	3	7	0	4	5	3	2	1	0	0	0	0	26.66666667	33.33333333	20	13.33333333	6.666666667	0	0	0	AFCat1
E9PZC3;Q923D2;E9PZC4;A0A0U1RPU7 [Flavin reductase (NADPH) ...]	0	388340	388340	7916070	388340	11327170	388340	388340	388340	388340	2	2	194170	194170	8982900	194170	194170	194170	194170	194170	194170	1	1	0	0	2	0	1	0	0	0	0	0	0	66.66666667	0	33.33333333	0	0	0	0	AFCat1
E9PZF0;Q01768;Q5NC79 [Nucleoside diphosphate kinase;Nucleoside diphospha ...]	0	582510	14282340	74516000	1955740	582510	6719570	582510	582510	582510	4	8	2041640	11107470	84408000	1940040	582510	2750940	582510	582510	582510	5	9	1	3	8	2	0	3	0	0	0	5.882352941	17.64705882	47.05882353	11.76470588	0	17.64705882	0	0	0	AFCat1
E9PZW0;E9Q557 [Desmoplakin ...]	0	1399040	2401440	582510	582510	4477410	582510	582510	582510	582510	5	5	1553140	2821140	582510	1263400	3788570	1251320	2070540	582510	1109770	5	9	2	2	0	1	6	1	1	0	1	14.28571429	14.28571429	0	7.142857143	42.85714286	7.142857143	7.142857143	0	7.142857143	AFCat1
E9Q1Y9;CON__Q61726;Q9ERE2;P97861;Q6IMF0;CON__P78386;Q9Z2T6;CON__O43790;CON__Q6NT21;CON__P78385;CON__Q14533 [Keratin, type II cuticular Hb1;Keratin, type II cu ...]	0	33850340	50613340	69954340	39939200	89886340	66791340	582510	582510	582510	4	9	26307340	44793340	28384340	3836800	95281340	57741340	16928340	582510	19749340	5	11	2	2	2	8	2	2	1	0	1	10	10	10	40	10	10	5	0	5	AFCat1
E9Q1Z0 [ ...]	0	65390000	75205600	95063500	60011600	110187700	107298800	2786840	46666300	3847940	10	34	41767500	118718300	78216000	17428300	114804600	107748000	34586900	42262000	23008470	9	38	17	14	10	7	8	8	5	7	3	21.51898734	17.72151899	12.65822785	8.860759494	10.12658228	10.12658228	6.329113924	8.860759494	3.797468354	AFCat1
E9Q3E1;F6QPV9;J3QMK6 [Aldehyde dehydrogenase ...]	0	388340	1236670	388340	388340	388340	388340	388340	4083270	388340	2	2	194170	194170	194170	194170	194170	194170	194170	3877600	194170	1	1	2	1	0	0	0	0	0	2	0	40	20	0	0	0	0	0	40	0	AFCat1
E9Q3W4;Q9QXS1;A0A3B2W7J8;A0A2I3BRT4;Q8R0W0 [Plectin ...]	0	582510	582510	3898740	582510	582510	2225350	582510	1660520	582510	5	5	582510	582510	582510	582510	582510	1376670	582510	1610960	582510	3	3	4	0	1	0	0	3	0	4	0	33.33333333	0	8.333333333	0	0	25	0	33.33333333	0	AFCat1
E9Q3X0;Q9EQK5 [Major vault protein ...]	0	194170	194170	2245400	194170	194170	194170	194170	194170	194170	1	1	388340	388340	1918570	388340	388340	1130230	388340	388340	388340	2	2	0	0	2	0	0	1	0	0	0	0	0	66.66666667	0	0	33.33333333	0	0	0	AFCat1
E9Q3Z4;Q3TRM8;E9Q8S8;D6RFA3;P52792 [Hexokinase;Hexokinase-3 ...]	0	582510	2310340	36558000	582510	582510	582510	582510	582510	582510	10	11	582510	3953680	39156000	582510	1339790	582510	582510	582510	582510	10	13	0	4	19	0	1	0	0	0	0	0	16.66666667	79.16666667	0	4.166666667	0	0	0	0	AFCat1
E9Q499;F2Z405;Q5I2A0 [Serine protease inhibitor A3G ...]	0	38160170	83926170	69939170	41620750	11218170	15977170	388340	3229370	388340	2	8	41427000	81540000	69331000	40597000	11131000	9859500	13958000	3153500	194170	1	8	4	2	2	3	2	2	1	2	0	22.22222222	11.11111111	11.11111111	16.66666667	11.11111111	11.11111111	5.555555556	11.11111111	0	AFCat1
E9Q604;G5E8F1;E9Q5K8;Q3U1U4;P05555;A0A0R4J1B4 [Integrin alpha-M ...]	0	582510	9795470	110885000	582510	4190440	582510	582510	582510	582510	12	14	582510	9989600	105549000	582510	582510	582510	582510	582510	582510	8	11	0	5	19	0	1	0	0	0	0	0	20	76	0	4	0	0	0	0	AFCat1
E9Q616;A0A494BBD5 [ ...]	0	582510	582510	23096770	582510	582510	1488840	582510	582510	582510	3	3	582510	582510	6247040	582510	582510	4050810	582510	582510	582510	3	3	0	0	3	0	0	3	0	0	0	0	0	50	0	0	50	0	0	0	AFCat1
E9Q8I0;P06909;D6RGQ0;E9Q8H9;A0A0A6YWP4;A0A0A6YVP8 [Complement factor H ...]	0	17669600	18969500	23551100	10572100	7018400	1023880	1817040	582510	1195250	10	28	22365400	18863400	18413800	11580900	4913370	582510	1743240	582510	1250960	11	28	12	11	12	10	6	1	2	0	2	21.42857143	19.64285714	21.42857143	17.85714286	10.71428571	1.785714286	3.571428571	0	3.571428571	AFCat1
E9QAY6;A0A0U1RP81;E9Q800;Q8CAQ8 [MICOS complex subunit Mic60 ...]	0	194170	194170	194170	194170	194170	194170	194170	736000	194170	1	1	388340	388340	388340	388340	388340	388340	388340	1322310	388340	2	2	3	0	0	0	0	0	0	3	0	50	0	0	0	0	0	0	50	0	AFCat1
E9QK48;Q7TNG5 [Echinoderm microtubule-associated protein-like 2 ...]	0	194170	194170	5848700	194170	194170	194170	194170	194170	194170	1	1	1573570	388340	5860070	388340	388340	388340	388340	388340	388340	2	2	1	0	2	0	0	0	0	0	0	33.33333333	0	66.66666667	0	0	0	0	0	0	AFCat1
E9QN08;A0A0R4J1L2;Q91VK2;Q80T06;P57776;D3Z7N2;D3YY68;D3YUQ9;D3YZT9;F6ZFU0;A0A0R4J1E2 [Elongation factor 1-delta ...]	0	388340	388340	388340	388340	388340	5211300	388340	388340	388340	2	2	388340	1912270	6844770	388340	388340	388340	388340	388340	388340	2	2	0	1	1	0	0	2	0	0	0	0	25	25	0	0	50	0	0	0	AFCat1
F6QYF8;Q11011;E9Q039 [Puromycin-sensitive aminopeptidase ...]	0	388340	388340	13198500	388340	388340	388340	388340	388340	388340	2	2	388340	388340	10389100	388340	388340	388340	388340	388340	388340	2	2	0	0	4	0	0	0	0	0	0	0	0	100	0	0	0	0	0	0	AFCat1
F6TVP2;Q60710;E9PYG9 [Deoxynucleoside triphosphate triphosphohydrolase S ...]	0	582510	582510	52156000	582510	582510	582510	582510	582510	582510	5	5	582510	582510	49333000	582510	582510	582510	582510	582510	582510	7	7	0	0	12	0	0	0	0	0	0	0	0	100	0	0	0	0	0	0	AFCat1
F6UFG6;D3YYE1;D3Z7M9;O35381;Q9EST5;Q64G17 [Acidic leucine-rich nuclear phosphoprotein 32 fami ...]	0	388340	2545370	3218670	388340	2256370	388340	388340	388340	388340	2	3	388340	2828070	5242170	388340	388340	1760070	388340	388340	388340	2	3	0	2	2	0	1	1	0	0	0	0	33.33333333	33.33333333	0	16.66666667	16.66666667	0	0	0	AFCat1
F6W0I8;Q8K2J1;A0A0R4J0W4;Q8CI85 [Carbonic anhydrase 12 ...]	0	194170	194170	194170	194170	194170	194170	1489800	194170	1217400	1	2	194170	194170	194170	194170	194170	194170	194170	194170	1273500	1	1	0	0	0	0	0	0	1	0	2	0	0	0	0	0	0	33.33333333	0	66.66666667	AFCat1
F6W322;B8JK33;B8JK32;Q9D0E1;A0A3Q4EH91 [Heterogeneous nuclear ribonucleoprotein M ...]	0	388340	1953970	12624700	388340	388340	388340	388340	388340	388340	2	3	194170	194170	194170	194170	194170	890080	194170	194170	194170	1	1	0	1	2	0	0	1	0	0	0	0	25	50	0	0	25	0	0	0	AFCat1
F6XVM5;A0A338P776;Q9DB20 [ATP synthase subunit O, mitochondrial ...]	0	388340	388340	388340	388340	388340	388340	388340	3224700	388340	2	2	388340	388340	6455270	388340	388340	388340	388340	3082130	388340	2	3	4	0	1	0	0	0	0	4	0	44.44444444	0	11.11111111	0	0	0	0	44.44444444	0	AFCat1
F6YHE5 [ ...]	0	194170	194170	194170	1056100	194170	194170	194170	194170	194170	1	1	194170	194170	6418000	194170	194170	194170	194170	194170	194170	1	1	0	0	1	1	0	0	0	0	0	0	0	50	50	0	0	0	0	0	AFCat1
F6ZKZ3;Q9R112;H3BLH2 [Sulfide:quinone oxidoreductase, mitochondrial ...]	0	388340	388340	8543800	388340	388340	388340	388340	388340	388340	2	2	194170	194170	5202800	194170	194170	194170	194170	194170	194170	1	1	0	0	3	0	0	0	0	0	0	0	0	100	0	0	0	0	0	0	AFCat1
F6ZSB7;Q61753 [D-3-phosphoglycerate dehydrogenase ...]	0	194170	194170	3738600	194170	194170	194170	194170	194170	194170	1	1	388340	388340	3885370	388340	388340	707850	388340	388340	388340	2	2	0	0	2	0	0	1	0	0	0	0	0	66.66666667	0	0	33.33333333	0	0	0	AFCat1
F6ZTG3;E9Q197;Q9CPV4 [Glyoxalase domain-containing protein 4 ...]	0	194170	194170	194170	194170	194170	2333300	194170	194170	194170	1	1	194170	194170	194170	194170	3478700	2140700	194170	194170	194170	1	2	0	0	0	0	1	2	0	0	0	0	0	0	0	33.33333333	66.66666667	0	0	0	AFCat1
F7BP55;Q9WTP6 [Adenylate kinase 2, mitochondrial;Adenylate kinase ...]	0	388340	388340	6890170	388340	652940	388340	388340	388340	388340	2	2	194170	194170	6516000	194170	194170	194170	194170	194170	194170	1	1	0	0	2	0	1	0	0	0	0	0	0	66.66666667	0	33.33333333	0	0	0	0	AFCat1
F7C106;A0A0A6YVR0;Q9D881;P19536 [Cytochrome c oxidase subunit 5B, mitochondrial ...]	0	194170	613510	194170	194170	194170	194170	194170	194170	194170	1	1	194170	194170	194170	194170	194170	1368900	194170	194170	194170	1	1	0	1	0	0	0	1	0	0	0	0	50	0	0	0	50	0	0	0	AFCat1
F7CAZ6;A2AMW0;P47757;A0A0A0MQI9;F6YHZ8 [F-actin-capping protein subunit beta ...]	0	388340	5901370	39565000	388340	388340	388340	388340	388340	388340	2	3	388340	7160300	25031170	388340	388340	388340	388340	388340	388340	2	3	0	3	3	0	0	0	0	0	0	0	50	50	0	0	0	0	0	0	AFCat1
F8WGL3;P18760;A0A494B9A7 [Cofilin-1 ...]	0	9272740	83228500	397247000	11596340	20137070	61400170	2500740	11330340	4319040	8	19	582510	83322900	254444000	10645340	22050170	23777340	582510	12294340	4441640	5	14	3	7	11	2	4	3	1	2	2	8.571428571	20	31.42857143	5.714285714	11.42857143	8.571428571	2.857142857	5.714285714	5.714285714	AFCat1
F8WIR1;P18242;F6Y6L6;A0A1B0GT66 [Cathepsin D ...]	0	388340	388340	12483170	388340	388340	1282770	388340	4720570	388340	2	3	582510	582510	11424340	1109520	582510	1469840	582510	4934040	582510	3	4	2	0	2	1	0	2	0	2	0	22.22222222	0	22.22222222	11.11111111	0	22.22222222	0	22.22222222	0	AFCat1
F8WIT2;P14824 [Annexin;Annexin A6 ...]	0	582510	582510	29463400	582510	582510	582510	582510	582510	582510	7	7	582510	1565740	30456200	582510	582510	582510	582510	582510	582510	6	7	0	1	13	0	0	0	0	0	0	0	7.142857143	92.85714286	0	0	0	0	0	0	AFCat1
F8WIV2;Q60854;E9PYY0;E9Q3Y1;E9Q6X2;E9Q108;E9Q0P9;K7E6F1;E9PZQ9;E9Q4R2 [Serpin B6 ...]	0	388340	388340	388340	388340	388340	388340	388340	2834000	388340	2	2	582510	582510	582510	582510	582510	4948870	582510	2822970	582510	3	4	4	0	0	0	0	2	0	4	0	40	0	0	0	0	20	0	40	0	AFCat1
F8WJ05;Q61702 [Inter-alpha-trypsin inhibitor heavy chain H1 ...]	0	582510	8376700	18991470	3001670	582510	582510	582510	582510	582510	4	7	1865440	5587370	17208870	1668140	582510	582510	582510	582510	582510	4	6	1	5	4	3	0	0	0	0	0	7.692307692	38.46153846	30.76923077	23.07692308	0	0	0	0	0	AFCat1
G3UWN9;G3UXY0;G3UXZ5;P97371;G3X9K9 [Proteasome activator complex subunit 1 ...]	0	388340	388340	25734700	388340	388340	388340	388340	388340	388340	2	2	388340	3230670	15738170	388340	388340	388340	388340	388340	388340	2	2	0	1	3	0	0	0	0	0	0	0	25	75	0	0	0	0	0	0	AFCat1
G3UX26;Q60930;D3YZT5;A0A286YCR8;D3YUN8 [Voltage-dependent anion-selective channel protein ...]	0	582510	5286170	16521570	582510	582510	1370800	582510	582510	582510	3	5	388340	5245200	12450170	388340	388340	388340	388340	1056590	388340	2	4	1	4	3	0	0	1	0	1	0	10	40	30	0	0	10	0	10	0	AFCat1
G3UY11;G5E8J2;B7ZW98;E9QNT8;G8JL84;D3YTV8;D3Z5M4;Q0VGY9;A0A0R4J1N7;Q02357;D6RJ51;F7D1P5 [Ankyrin-1 ...]	0	388340	388340	388340	388340	3028900	388340	388340	388340	388340	2	2	582510	582510	4631940	582510	1857440	582510	582510	582510	582510	3	3	0	0	1	0	4	0	0	0	0	0	0	20	0	80	0	0	0	0	AFCat1
G3UY13;E9Q6I2;Q61730 [Interleukin-1 receptor accessory protein ...]	0	194170	6580800	194170	194170	194170	194170	194170	194170	194170	1	1	194170	6820300	194170	194170	194170	194170	194170	194170	194170	1	1	0	2	0	0	0	0	0	0	0	0	100	0	0	0	0	0	0	0	AFCat1
G3UY29;E9Q3P9;F8WGS1;P62492;P46638;G3UZD3;G3UZL4;D3YYB3 [Ras-related protein Rab-11A;Ras-related protein Ra ...]	0	582510	4466370	41169100	582510	582510	8887770	582510	1772440	582510	4	9	582510	3827570	21629970	582510	1984540	3194040	582510	7159970	582510	4	8	3	4	6	0	1	3	0	3	0	15	20	30	0	5	15	0	15	0	AFCat1
G3UYI4;G3UYL3;Q8BG32 [26S proteasome non-ATPase regulatory subunit 11 ...]	0	194170	194170	194170	194170	194170	4492000	194170	3672500	194170	1	2	194170	194170	194170	1168300	194170	4872900	194170	3694300	770480	1	4	2	0	0	1	0	2	0	2	1	25	0	0	12.5	0	25	0	25	12.5	AFCat1
G3UYL6;G3UX05;Q99L20;G3UYJ7 [ ...]	0	194170	194170	194170	194170	194170	194170	194170	1820400	194170	1	1	194170	194170	194170	194170	194170	194170	194170	1985000	194170	1	1	2	0	0	0	0	0	0	2	0	50	0	0	0	0	0	0	50	0	AFCat1
G3UYV7;P62858 [40S ribosomal protein S28 ...]	0	194170	1066600	2448000	769140	976910	3558300	194170	1639500	194170	1	6	194170	1207400	3451700	803390	194170	3537300	194170	1961400	194170	1	5	2	2	2	2	1	2	0	2	0	15.38461538	15.38461538	15.38461538	15.38461538	7.692307692	15.38461538	0	15.38461538	0	AFCat1
G3X8T9;Q91WP6;H7BWY0;Q6P4P1 [Serine protease inhibitor A3N ...]	0	38354340	85671870	82982400	41335340	11412340	16171340	582510	3423540	582510	4	10	41427000	81540000	69331000	40597000	11131000	9859500	13958000	3153500	194170	1	8	4	3	4	2	2	2	1	2	0	20	15	20	10	10	10	5	10	0	AFCat1
G3X920;Q9DBR3 [Armadillo repeat-containing protein 8 ...]	0	194170	194170	20010000	194170	194170	194170	194170	194170	194170	1	1	194170	194170	20162000	194170	194170	194170	194170	194170	194170	1	1	0	0	2	0	0	0	0	0	0	0	0	100	0	0	0	0	0	0	AFCat1
G3X977;Q61703;Q3UEG7;CON__Q9TRI1 [Inter-alpha-trypsin inhibitor heavy chain H2 ...]	0	2058040	2731440	41449170	2927470	582510	582510	582510	582510	582510	6	6	388340	3512270	17206170	388340	388340	388340	388340	388340	388340	2	2	1	2	3	2	0	0	0	0	0	12.5	25	37.5	25	0	0	0	0	0	AFCat1
G3X9D9;P48997 [Involucrin ...]	0	582510	4142540	582510	2332520	6134440	38456800	582510	29236900	1801480	9	18	2204340	582510	582510	2238000	3925670	35769600	582510	35162800	1625250	8	17	11	1	0	4	3	12	0	10	4	24.44444444	2.222222222	0	8.888888889	6.666666667	26.66666667	0	22.22222222	8.888888889	AFCat1
G3X9T8;G3X8Q5;E9PZD8;Q61147;G3UXG1;G3UWP5;G3UZ53 [Ceruloplasmin ...]	0	18219700	37401600	101537000	17982200	4858440	1484840	582510	582510	1172860	13	32	17375800	31825900	109147000	10617900	4360740	1287550	582510	582510	582510	14	32	15	19	18	7	2	2	0	0	1	23.4375	29.6875	28.125	10.9375	3.125	3.125	0	0	1.5625	AFCat1
G3X9V0;P97372 [Proteasome activator complex subunit 2 ...]	0	388340	388340	14881600	388340	388340	664420	388340	388340	388340	2	3	194170	194170	4003600	194170	194170	477000	194170	194170	194170	1	2	0	0	3	0	0	2	0	0	0	0	0	60	0	0	40	0	0	0	AFCat1
G5DDB7;Q8R3B1 [Phosphoinositide phospholipase C;1-phosphatidylino ...]	0	194170	194170	194170	194170	194170	194170	194170	892030	194170	1	1	194170	194170	194170	194170	194170	194170	194170	760720	194170	1	1	2	0	0	0	0	0	0	2	0	50	0	0	0	0	0	0	50	0	AFCat1
G5E839;P80315 [T-complex protein 1 subunit delta ...]	0	582510	582510	8711540	582510	582510	3839070	582510	582510	582510	3	3	582510	582510	13274170	582510	582510	1201080	582510	582510	582510	3	3	0	0	3	0	0	3	0	0	0	0	0	50	0	0	50	0	0	0	AFCat1
G5E850;P56395;E0CY88 [Cytochrome b5 ...]	0	388340	388340	388340	388340	388340	388340	388340	4533230	388340	2	2	388340	388340	17819700	388340	388340	388340	388340	4512170	388340	2	3	3	0	2	0	0	0	0	3	0	37.5	0	25	0	0	0	0	37.5	0	AFCat1
G5E902;Q8VEM8 [Phosphate carrier protein, mitochondrial ...]	0	582510	582510	5054240	582510	3812370	582510	582510	582510	582510	3	3	582510	582510	4354440	582510	4019970	582510	582510	1332850	582510	3	4	1	0	2	0	4	0	0	1	0	12.5	0	25	0	50	0	0	12.5	0	AFCat1
H3BJP2;H3BK43;H3BLJ9;H3BJL6;H3BKH6;Q9R0P3 [S-formylglutathione hydrolase ...]	0	194170	194170	4252000	194170	194170	1531800	194170	194170	194170	1	2	194170	194170	194170	194170	194170	194170	194170	997440	194170	1	1	1	0	1	0	0	1	0	1	0	25	0	25	0	0	25	0	25	0	AFCat1
H3BJQ7;P99029;A0A494BAZ4;G3UZJ4 [Peroxiredoxin-5, mitochondrial ...]	0	582510	61295300	376511000	2057340	22725970	18692970	582510	6624840	582510	6	14	4386970	59952300	382614000	2343140	20363170	18854270	1819740	6290940	1931240	5	17	4	6	9	2	4	4	1	2	1	12.12121212	18.18181818	27.27272727	6.060606061	12.12121212	12.12121212	3.03030303	6.060606061	3.03030303	AFCat1
H3BK03;P52430;H3BLB8 [Serum paraoxonase/arylesterase 1 ...]	0	194170	4142700	7801200	194170	194170	194170	194170	194170	194170	1	2	3368440	582510	13965670	582510	582510	582510	582510	582510	582510	3	3	1	1	3	0	0	0	0	0	0	20	20	60	0	0	0	0	0	0	AFCat1
H3BKI8;A0A286YDM3;H3BK96;H3BKD0;B2M1R6;P61979;A0A286YCM2;H3BLL4;A0A286YEC4;A0A286YE41;H3BJ43;H3BJS9;Q8BT23;A0A286YDH1 [Heterogeneous nuclear ribonucleoprotein K ...]	0	582510	7246170	51402900	979530	582510	1790440	582510	1537940	582510	5	10	582510	2928040	51672000	582510	582510	2031840	582510	1556040	582510	6	8	2	3	10	1	0	2	0	2	0	10	15	50	5	0	10	0	10	0	AFCat1
H3BKL7;E9Q797;P49183;D3YXC7 [Deoxyribonuclease-1 ...]	0	388340	19143700	388340	388340	3185670	1969870	388340	388340	388340	2	4	996400	9775200	194170	194170	3015100	1672000	194170	194170	194170	1	4	1	3	0	0	2	2	0	0	0	12.5	37.5	0	0	25	25	0	0	0	AFCat1
H7BWY6;Q00724;A0A494B9P3;A0A494B9T2 [Retinol-binding protein 4 ...]	0	1878270	1767070	6137800	1266770	388340	388340	388340	388340	388340	2	5	1966300	1353800	194170	1337400	591780	194170	194170	194170	194170	1	4	2	2	2	2	1	0	0	0	0	22.22222222	22.22222222	22.22222222	22.22222222	11.11111111	0	0	0	0	AFCat1
H7BX22;P34022 [Ran-specific GTPase-activating protein ...]	0	194170	999040	3245300	194170	194170	963020	194170	194170	194170	1	3	194170	194170	3237700	194170	1258400	194170	194170	194170	194170	1	2	0	1	2	0	1	1	0	0	0	0	20	40	0	20	20	0	0	0	AFCat1
H7C7A0 [ ...]	0	388340	388340	388340	7740600	2152670	388340	388340	388340	388340	2	3	582510	582510	582510	10831800	2829640	582510	582510	582510	582510	3	4	0	0	0	5	2	0	0	0	0	0	0	0	71.42857143	28.57142857	0	0	0	0	AFCat1
I7HLV2;Q6ZWV3;P86048;A0A1B0GXC3 [60S ribosomal protein L10;60S ribosomal protein L1 ...]	0	194170	194170	6561000	194170	194170	194170	194170	194170	194170	1	1	582510	582510	8595270	582510	1534140	582510	582510	582510	582510	3	3	0	0	3	0	1	0	0	0	0	0	0	75	0	25	0	0	0	0	AFCat1
I7HPY0;Q91VW3 [SH3 domain-binding glutamic acid-rich-like protein ...]	0	194170	12870000	37444000	5395100	12829000	10305000	1392100	2658900	1773200	1	8	2444700	13578000	22954000	3988200	11427000	9173900	1064000	194170	2133300	1	8	2	2	2	2	2	2	2	1	2	11.76470588	11.76470588	11.76470588	11.76470588	11.76470588	11.76470588	11.76470588	5.882352941	11.76470588	AFCat1
J3QP71;K3W4Q8;P18572 [Basigin ...]	0	582510	582510	2842440	582510	1333920	582510	582510	582510	582510	3	3	194170	194170	2102100	194170	893860	194170	194170	194170	194170	1	2	0	0	2	0	3	0	0	0	0	0	0	40	0	60	0	0	0	0	AFCat1
K3W4R2;Q6URW6;A0A140LHX1 [Myosin-14 ...]	0	582510	582510	32103400	582510	582510	2114350	582510	582510	582510	4	5	582510	3966740	33791600	582510	582510	582510	582510	582510	582510	4	4	0	1	6	0	0	2	0	0	0	0	11.11111111	66.66666667	0	0	22.22222222	0	0	0	AFCat1
K9J7B2;Q64435;D3YZE6;D3Z7G0;D3YZ96;G3UZC9;B2RT14;E9PXN7;D3Z748;Q62452;P70691;Q63886;D6RH94;D3YWN0;D3YUP6;Q8BJL9;Q91WH2;Q8VCN3;Q8K169;Q3UEP4;P17717 [UDP-glucuronosyltransferase 1-6;UDP-glucuronosyltr ...]	0	582510	5606170	582510	1140380	582510	2933040	582510	8364870	582510	3	6	582510	4537670	582510	582510	582510	3023840	582510	5220370	582510	3	5	4	4	0	1	0	2	0	4	0	26.66666667	26.66666667	0	6.666666667	0	13.33333333	0	26.66666667	0	AFCat1
M0QWU8;P31786 [Acyl-CoA-binding protein ...]	0	194170	6616800	20211000	2032600	194170	194170	194170	7449100	194170	1	4	194170	6019800	194170	2630000	194170	194170	194170	7895200	194170	1	3	2	2	1	2	0	0	0	2	0	22.22222222	22.22222222	11.11111111	22.22222222	0	0	0	22.22222222	0	AFCat1
O08439 [ ...]	0	194170	194170	194170	1213400	194170	194170	194170	194170	194170	1	1	194170	194170	194170	1244200	194170	194170	194170	194170	194170	1	1	0	0	0	2	0	0	0	0	0	0	0	0	100	0	0	0	0	0	AFCat1
O08553 [Dihydropyrimidinase-related protein 2 ...]	0	194170	194170	5579600	194170	194170	194170	194170	194170	194170	1	1	388340	388340	6576470	871250	388340	388340	388340	388340	388340	2	2	0	0	2	1	0	0	0	0	0	0	0	66.66666667	33.33333333	0	0	0	0	0	AFCat1
O08692 [Neutrophilic granule protein ...]	0	4807670	220539000	912790000	41422500	301349000	62068000	8279270	582510	10844600	8	30	582510	230865000	1049360000	38212100	277757000	41923170	5907240	582510	10683170	8	26	2	13	13	6	9	5	3	0	5	3.571428571	23.21428571	23.21428571	10.71428571	16.07142857	8.928571429	5.357142857	0	8.928571429	AFCat1
O08997 [Copper transport protein ATOX1 ...]	0	388340	10150070	11813170	1290870	388340	388340	388340	388340	388340	2	3	1279100	8972700	194170	194170	194170	194170	194170	194170	194170	1	2	1	2	1	1	0	0	0	0	0	20	40	20	20	0	0	0	0	0	AFCat1
O09043 [Napsin-A ...]	0	6944500	33833000	4679200	6375500	8397700	18220000	8713400	194170	19638000	1	8	6866700	35416000	5209000	6296300	7933300	17902000	8728800	194170	20299000	1	8	2	2	2	2	2	2	2	0	2	12.5	12.5	12.5	12.5	12.5	12.5	12.5	0	12.5	AFCat1
O09114 [Prostaglandin-H2 D-isomerase ...]	0	194170	4703800	194170	194170	2995200	194170	194170	194170	194170	1	2	194170	4921100	194170	194170	3019600	194170	2141800	194170	3616900	1	4	0	2	0	0	2	0	1	0	1	0	33.33333333	0	0	33.33333333	0	16.66666667	0	16.66666667	AFCat1
O09131;A0A494BAB1;A0A494B9X6;A0A494BAY2;A0A494BB82;Q8K2Q2 [Glutathione S-transferase omega-1 ...]	0	2702240	2736140	25980170	3480970	582510	28757400	582510	14800400	582510	5	13	3322440	3751970	24145170	4771700	4478850	23376200	582510	12868070	1503740	6	18	8	3	4	5	2	8	0	5	1	22.22222222	8.333333333	11.11111111	13.88888889	5.555555556	22.22222222	0	13.88888889	2.777777778	AFCat1
O35639;Q3TET3;A0A0G2JDV9;A0A0G2JGL7 [Annexin A3 ...]	0	582510	14116100	96138000	582510	1137700	5089800	582510	5119700	582510	11	20	2050540	14008000	88260000	1424740	582510	3087610	582510	5690600	582510	8	18	7	8	16	1	1	5	0	6	0	15.90909091	18.18181818	36.36363636	2.272727273	2.272727273	11.36363636	0	13.63636364	0	AFCat1
O35744;F6RU51 [Chitinase-like protein 3 ...]	0	582510	116257000	678930000	582510	19277300	8259400	582510	582510	582510	9	22	582510	122058000	674940000	2891040	22597200	5962270	582510	582510	582510	11	24	0	14	18	1	8	5	0	0	0	0	30.43478261	39.13043478	2.173913043	17.39130435	10.86956522	0	0	0	AFCat1
O35945 [Aldehyde dehydrogenase, cytosolic 1 ...]	0	388340	388340	16084170	388340	388340	388340	388340	1687470	388340	2	2	194170	194170	194170	194170	194170	2603600	194170	2697200	194170	1	2	2	0	1	0	0	1	0	2	0	33.33333333	0	16.66666667	0	0	16.66666667	0	33.33333333	0	AFCat1
O55022 [Membrane-associated progesterone receptor componen ...]	0	388340	388340	388340	388340	388340	2286270	388340	741080	388340	2	2	194170	194170	194170	194170	194170	194170	194170	2335600	194170	1	1	2	0	0	0	0	1	0	2	0	40	0	0	0	0	20	0	40	0	AFCat1
O55142 [60S ribosomal protein L35a ...]	0	582510	582510	4926040	582510	582510	5472570	582510	1856340	582510	3	4	388340	388340	3036070	388340	388340	1569070	388340	388340	388340	2	2	1	0	2	0	0	3	0	1	0	14.28571429	0	28.57142857	0	0	42.85714286	0	14.28571429	0	AFCat1
O55234;Q8BTY5 [Proteasome subunit beta type-5 ...]	0	194170	194170	194170	194170	1019800	1624700	194170	522810	194170	1	3	582510	582510	582510	582510	1387150	2707350	582510	1242900	582510	3	5	3	0	0	0	2	3	0	3	0	27.27272727	0	0	0	18.18181818	27.27272727	0	27.27272727	0	AFCat1
O70138 [Neutrophil collagenase ...]	0	388340	388340	12230600	388340	388340	388340	388340	388340	388340	2	2	194170	194170	5690900	194170	194170	194170	194170	194170	194170	1	1	0	0	3	0	0	0	0	0	0	0	0	100	0	0	0	0	0	0	AFCat1
O70145;A0A087WPH0 [Neutrophil cytosol factor 2 ...]	0	582510	13560600	25630500	582510	582510	582510	582510	582510	582510	6	6	582510	2713340	42927200	582510	582510	582510	582510	582510	582510	5	6	0	4	8	0	0	0	0	0	0	0	33.33333333	66.66666667	0	0	0	0	0	0	AFCat1
O70435;E0CZ34;F8WH02;E0CYL6;E0CX62 [Proteasome subunit alpha type-3 ...]	0	582510	582510	18751100	582510	582510	582510	582510	582510	582510	3	3	582510	2338740	18618400	582510	582510	582510	582510	582510	582510	3	4	0	1	6	0	0	0	0	0	0	0	14.28571429	85.71428571	0	0	0	0	0	0	AFCat1
O70456 [14-3-3 protein sigma ...]	0	6771800	46404300	202283000	23032600	46824000	161436000	7408570	52158000	7878370	14	40	582510	13852400	39290170	29684600	46270000	158779000	6830870	36001000	15115800	12	37	16	6	5	12	11	17	4	13	6	17.77777778	6.666666667	5.555555556	13.33333333	12.22222222	18.88888889	4.444444444	14.44444444	6.666666667	AFCat1
O70475;D3YXP9 [UDP-glucose 6-dehydrogenase ...]	0	1670840	1175360	582510	2434340	2045140	12617970	1429640	11520780	1529610	3	13	928450	1137320	582510	2434090	1848440	11878570	1398040	11553100	1422050	4	14	9	2	0	4	2	4	2	7	4	26.47058824	5.882352941	0	11.76470588	5.882352941	11.76470588	5.882352941	20.58823529	11.76470588	AFCat1
O88342;A0A0J9YU05 [WD repeat-containing protein 1 ...]	0	582510	15486300	73372000	2737140	10139900	12354000	582510	5429640	1733840	11	24	582510	12341800	62221000	2610940	12587100	14038400	582510	5123340	1757440	9	24	2	9	16	2	8	9	0	2	2	4	18	32	4	16	18	0	4	4	AFCat1
O88536 [Formyl peptide receptor 2 ...]	0	194170	194170	9324200	194170	194170	194170	194170	194170	194170	1	1	194170	194170	8439000	194170	194170	194170	194170	194170	194170	1	1	0	0	2	0	0	0	0	0	0	0	0	100	0	0	0	0	0	0	AFCat1
O88569;A0A0N4SUM2 [Heterogeneous nuclear ribonucleoproteins A2/B1 ...]	0	882100	4308140	83548000	582510	1497240	582510	582510	2828870	582510	11	16	582510	14552700	77562000	582510	954190	582510	582510	1515340	582510	7	13	4	5	18	0	2	0	0	3	0	12.5	15.625	56.25	0	6.25	0	0	9.375	0	AFCat1
O88844;A0A087WPT4;A0A087WRS9;D3YVY3;A0A087WRM4;A0A0U1RP68;D6RIL6;P54071 [Isocitrate dehydrogenase [NADP] cytoplasmic ...]	0	582510	8269600	40369800	7779970	8273870	37235100	3195740	24337700	2625340	10	26	5121240	7376200	40090900	582510	8916900	19657900	2779540	41055400	3850040	9	23	14	7	10	2	5	7	2	13	2	22.58064516	11.29032258	16.12903226	3.225806452	8.064516129	11.29032258	3.225806452	20.96774194	3.225806452	AFCat1
O89020 [Afamin ...]	0	11338600	16673500	32337340	2951440	582510	582510	582510	582510	582510	5	8	10384500	19848500	35770170	2539040	582510	582510	582510	582510	582510	5	10	6	7	3	2	0	0	0	0	0	33.33333333	38.88888889	16.66666667	11.11111111	0	0	0	0	0	AFCat1
O89053;G3UYK8;A0A0U1RPY8;D3YW57;G3UX53;D3YXM2 [Coronin-1A;Coronin ...]	0	582510	83808000	254815000	5167770	25213500	1600440	582510	582510	582510	10	24	582510	77667000	302379000	2877540	12259900	582510	582510	582510	582510	10	23	0	16	19	3	8	1	0	0	0	0	34.04255319	40.42553191	6.382978723	17.0212766	2.127659574	0	0	0	AFCat1
P00329 [Alcohol dehydrogenase 1 ...]	0	3601040	5385840	582510	2417540	1505640	49692000	582510	26857170	1687440	5	12	3424040	5552540	582510	2722340	2420140	54081000	582510	34795000	1653040	6	14	8	2	0	2	2	10	0	6	2	25	6.25	0	6.25	6.25	31.25	0	18.75	6.25	AFCat1
P00405 [Cytochrome c oxidase subunit 2 ...]	0	194170	1939400	8090100	194170	194170	194170	194170	1802600	194170	1	3	388340	388340	12738300	388340	1827170	388340	388340	388340	388340	2	3	1	1	3	0	1	0	0	1	0	14.28571429	14.28571429	42.85714286	0	14.28571429	0	0	14.28571429	0	AFCat1
P00920;A0A0A6YX78 [Carbonic anhydrase 2 ...]	0	582510	15978070	86761000	2503440	44158770	1752940	582510	582510	582510	4	10	582510	11247770	145331000	2535140	54946170	582510	2390440	582510	582510	9	14	0	4	12	2	4	1	1	0	0	0	16.66666667	50	8.333333333	16.66666667	4.166666667	4.166666667	0	0	AFCat1
P01027;H3BKW9;H3BL60;CON__Q2UVX4 [Complement C3;Complement C3 beta chain;C3-beta-c;C ...]	0	88876000	164821000	201377000	84401000	93348000	28156000	30207300	1880310	16433100	44	173	86824000	138950000	211428000	98016000	89409000	27801000	35568500	3682300	15873000	49	175	68	70	54	57	36	25	25	7	13	19.15492958	19.71830986	15.21126761	16.05633803	10.14084507	7.042253521	7.042253521	1.971830986	3.661971831	AFCat1
P01029 [Complement C4-B;Complement C4 beta chain;Complemen ...]	0	2302460	9995000	27371200	3837100	582510	582510	582510	582510	582510	10	20	3377010	11096700	26970500	3929500	582510	582510	582510	582510	582510	13	20	5	16	13	6	0	0	0	0	0	12.5	40	32.5	15	0	0	0	0	0	AFCat1
P01132;A0A0G2JDT8;A0A0G2JF92;A0A0G2JFB8 [Pro-epidermal growth factor;Epidermal growth facto ...]	0	36585400	218465000	582510	6850700	30990100	9802600	4933670	1203210	5009470	20	46	34100100	166953000	582510	6463140	29626100	40858100	3136540	582510	1681540	19	39	21	35	0	4	10	9	3	1	3	24.41860465	40.69767442	0	4.651162791	11.62790698	10.46511628	3.488372093	1.162790698	3.488372093	AFCat1
P01837 [Ig kappa chain C region ...]	0	14240170	14519170	388340	8936570	388340	388340	388340	388340	388340	2	3	12676170	388340	3727070	10099470	388340	388340	388340	388340	388340	2	3	2	1	1	2	0	0	0	0	0	33.33333333	16.66666667	16.66666667	33.33333333	0	0	0	0	0	AFCat1
P01887 [Beta-2-microglobulin ...]	0	388340	5036870	38082000	3242370	3265070	1244770	1115450	388340	1036130	2	8	388340	5240570	34330600	3249370	388340	1344170	388340	702700	388340	2	6	1	2	4	2	1	2	1	1	1	6.666666667	13.33333333	26.66666667	13.33333333	6.666666667	13.33333333	6.666666667	6.666666667	6.666666667	AFCat1
P01897;P01899;P01896 [H-2 class I histocompatibility antigen, L-D alpha ...]	0	582510	10769300	50112100	582510	582510	582510	582510	582510	582510	4	6	582510	8601220	42989500	582510	582510	582510	582510	582510	582510	4	5	0	5	6	0	0	0	0	0	0	0	45.45454545	54.54545455	0	0	0	0	0	0	AFCat1
P01898;A0A494B9G2;A0A0B4J1G3;A0A494B9G8;E9PWT4;E9QJR9;P79568;E9PX63;Q8HWB2;A0A494BA33;A0A494BAT0;Q3TH01;O19441;A7VMS6;E9Q0G4;G3UXE9;P01895;P14430;P14428;P14429;P14426;P01900;P03991;P04223;P01901 [H-2 class I histocompatibility antigen, Q10 alpha ...]	0	7005370	13753400	52055700	3685040	582510	582510	582510	582510	582510	5	10	5210370	12446400	43386200	4522940	582510	582510	582510	582510	582510	5	10	4	8	6	2	0	0	0	0	0	20	40	30	10	0	0	0	0	0	AFCat1
P03953 [Complement factor D ...]	0	15244340	87076800	582510	582510	582510	8101140	582510	582510	582510	3	5	24756970	56379300	582510	582510	582510	582510	582510	582510	582510	5	5	3	6	0	0	0	1	0	0	0	30	60	0	0	0	10	0	0	0	AFCat1
P04104 [Keratin, type II cytoskeletal 1 ...]	0	92499800	134941000	141801500	41704170	60175170	50539800	52772070	582510	56494340	9	21	67671340	199614500	156618000	26497340	53585170	44402140	68484800	20479340	55969340	12	26	5	8	14	3	4	5	6	1	2	10.41666667	16.66666667	29.16666667	6.25	8.333333333	10.41666667	12.5	2.083333333	4.166666667	AFCat1
P04117;A0A0A6YW05;A0A0A6YXB9;A0A0A6YXI2;P24526;O08716 [Fatty acid-binding protein, adipocyte ...]	0	11856570	54713000	23395670	28568900	24721300	154287000	582510	27513300	7320270	6	26	15439300	53931000	23964070	21669070	18477770	179735000	6994640	26836600	3175040	7	27	15	10	4	5	6	9	1	10	3	23.80952381	15.87301587	6.349206349	7.936507937	9.523809524	14.28571429	1.587301587	15.87301587	4.761904762	AFCat1
P04919 [Band 3 anion transport protein ...]	0	582510	1339250	107573000	582510	24984500	582510	582510	582510	582510	8	13	582510	1580940	101169000	582510	22659200	582510	582510	582510	582510	8	12	0	2	15	0	8	0	0	0	0	0	8	60	0	32	0	0	0	0	AFCat1
P05064;A6ZI44;Q9CPQ9;A6ZI46;D3Z510;A0A0U1RPN8;D3YWI1;D3YV98;A0A0U1RPT5;A6ZI47 [Fructose-bisphosphate aldolase A;Fructose-bisphosp ...]	0	4752370	32903400	103233000	12332400	19125800	21609400	582510	11565700	582510	10	29	5677170	30240200	117983000	12110500	16741470	20203100	582510	10297200	986100	10	30	11	11	12	8	5	11	0	7	1	16.66666667	16.66666667	18.18181818	12.12121212	7.575757576	16.66666667	0	10.60606061	1.515151515	AFCat1
P05201 [Aspartate aminotransferase, cytoplasmic ...]	0	388340	388340	388340	24200170	388340	388340	388340	1398570	388340	2	2	40590170	388340	388340	388340	388340	1871970	388340	388340	388340	2	2	2	0	0	1	0	1	0	1	0	40	0	0	20	0	20	0	20	0	AFCat1
P05202 [Aspartate aminotransferase, mitochondrial ...]	0	582510	5062820	13940600	582510	582510	3154980	582510	3120440	582510	4	9	1288900	4685270	14709470	582510	582510	2385740	582510	5349530	582510	4	9	5	5	5	0	0	3	0	4	0	22.72727273	22.72727273	22.72727273	0	0	13.63636364	0	18.18181818	0	AFCat1
P05366;A0A1B0GQV5;P05367 [Serum amyloid A-1 protein;Serum amyloid A-2 protei ...]	0	1046650	388340	388340	388340	1549870	388340	388340	388340	388340	2	2	821510	1416370	3241770	388340	1593370	388340	388340	388340	388340	2	4	2	1	1	0	2	0	0	0	0	33.33333333	16.66666667	16.66666667	0	33.33333333	0	0	0	0	AFCat1
P06684 [Complement C5;Complement C5 beta chain;Complement ...]	0	3242670	4962070	582510	582510	582510	582510	582510	582510	582510	3	4	3347570	7902900	582510	582510	582510	582510	582510	582510	582510	4	5	4	5	0	0	0	0	0	0	0	44.44444444	55.55555556	0	0	0	0	0	0	0	AFCat1
P06728 [Apolipoprotein A-IV ...]	0	46392000	64337000	34349000	19365600	14030200	2549740	1876540	2857270	582510	9	26	47813000	51514000	36318900	25509000	10050200	4297570	2980370	1459340	1064660	8	30	15	12	7	9	6	3	3	3	1	25.42372881	20.33898305	11.86440678	15.25423729	10.16949153	5.084745763	5.084745763	5.084745763	1.694915254	AFCat1
P06745;A0A0U1RQ72;A0A0U1RP97;CON__Q3ZBD7;A0A0U1RQ18 [Glucose-6-phosphate isomerase ...]	0	582510	35182900	219644000	3868740	4350270	14068800	582510	582510	582510	14	24	582510	34886600	246761000	582510	7117500	8998100	582510	582510	582510	12	21	0	12	19	1	5	8	0	0	0	0	26.66666667	42.22222222	2.222222222	11.11111111	17.77777778	0	0	0	AFCat1
P06801;Q3TQP6 [NADP-dependent malic enzyme;Malic enzyme ...]	0	864650	582510	582510	1085020	1143860	12033100	582510	2968860	582510	5	10	582510	1343100	582510	1146430	582510	12523200	812900	1339430	582510	3	7	4	1	0	2	1	8	1	3	0	20	5	0	10	5	40	5	15	0	AFCat1
P07309 [Transthyretin ...]	0	187331000	261212000	324729000	91701000	76255700	27317370	21299370	1940240	4854470	4	25	153771000	250173000	261622000	93191000	73359500	6882540	21600370	1815640	2591940	4	22	9	8	8	6	6	3	4	2	3	18.36734694	16.32653061	16.32653061	12.24489796	12.24489796	6.12244898	8.163265306	4.081632653	6.12244898	AFCat1
P07310;A0A0J9YKD4 [Creatine kinase M-type ...]	0	388340	388340	388340	6420400	4430770	388340	388340	388340	388340	2	3	194170	194170	194170	4206100	4475600	194170	194170	194170	194170	1	2	0	0	0	3	2	0	0	0	0	0	0	0	60	40	0	0	0	0	AFCat1
P07356;B0V2N8;B0V2N7;B0V2N5 [Annexin A2;Annexin ...]	0	4269570	39443600	179414000	2644640	8280470	14482870	582510	6971670	1987340	12	25	4285970	36581700	176778000	2231240	5565940	11863700	1474640	6357270	1970140	11	27	8	9	22	2	3	5	1	4	2	14.28571429	16.07142857	39.28571429	3.571428571	5.357142857	8.928571429	1.785714286	7.142857143	3.571428571	AFCat1
P07361 [Alpha-1-acid glycoprotein 2 ...]	0	388340	3951070	15662000	388340	388340	388340	388340	388340	388340	2	3	3762470	4520370	12188100	388340	388340	388340	388340	388340	388340	2	4	1	2	4	0	0	0	0	0	0	14.28571429	28.57142857	57.14285714	0	0	0	0	0	0	AFCat1
P07515 [ ...]	0	2226400	1060800	194170	9278500	194170	194170	194170	194170	194170	1	3	2401800	194170	194170	9775500	2162200	194170	194170	194170	194170	1	3	2	1	0	2	1	0	0	0	0	33.33333333	16.66666667	0	33.33333333	16.66666667	0	0	0	0	AFCat1
P07724 [Serum albumin ...]	0	5313400000	6394800000	7473300000	3194400000	1320840000	1075610000	970690000	273408000	650140000	39	197	5.23E+09	4937200000	8212400000	3503400000	1202910000	887860000	980770000	304714000	571110000	39	192	96	65	60	52	32	36	24	34	24	22.69503546	15.36643026	14.18439716	12.29314421	7.56501182	8.510638298	5.673758865	8.037825059	5.673758865	AFCat1
P07901;B7ZC50;A2A6A2;B7ZC49;REV__Q8BL66 [Heat shock protein HSP 90-alpha ...]	0	1640140	9000600	73964000	582510	3876440	10155000	582510	4174500	582510	10	19	3242170	8183900	76046000	2998410	3660240	8235970	582510	5102370	582510	11	19	7	7	14	2	2	6	0	4	0	16.66666667	16.66666667	33.33333333	4.761904762	4.761904762	14.28571429	0	9.523809524	0	AFCat1
P08030;A0A1D5RLR6 [Adenine phosphoribosyltransferase ...]	0	582510	3554640	15769470	582510	582510	1712040	582510	582510	582510	3	4	388340	388340	29841000	388340	388340	388340	388340	388340	388340	2	2	0	1	4	0	0	1	0	0	0	0	16.66666667	66.66666667	0	0	16.66666667	0	0	0	AFCat1
P08032 [Spectrin alpha chain, erythrocytic 1 ...]	0	582510	582510	8960500	582510	5576900	582510	582510	582510	582510	8	8	582510	582510	3169040	582510	5874400	582510	582510	582510	582510	6	6	0	0	4	0	10	0	0	0	0	0	0	28.57142857	0	71.42857143	0	0	0	0	AFCat1
P08071;A0A0G2JDN0;A0A0G2JGN1;A0A0G2JFM6;A0A0G2JEA3 [Lactotransferrin ...]	0	582510	65698000	496430000	5907270	51167000	8562770	1606640	582510	1250650	21	48	582510	64808000	447300000	2420540	48870000	8013570	1448840	582510	1108180	18	41	0	27	32	3	19	4	2	0	2	0	30.33707865	35.95505618	3.370786517	21.34831461	4.494382022	2.247191011	0	2.247191011	AFCat1
P08074;F6YNX9 [Carbonyl reductase [NADPH] 2 ...]	0	388340	388340	35071800	388340	388340	388340	388340	2436870	388340	2	3	582510	582510	58424300	582510	582510	1986140	582510	1025010	582510	4	5	2	0	5	0	0	1	0	2	0	20	0	50	0	0	10	0	20	0	AFCat1
P08113;F7C312 [Endoplasmin ...]	0	2055940	9934500	52162500	582510	582510	6234870	582510	7116100	582510	9	18	2243540	2837040	57025000	582510	582510	5348940	582510	6222070	582510	7	12	7	5	15	0	0	3	0	5	0	20	14.28571429	42.85714286	0	0	8.571428571	0	14.28571429	0	AFCat1
P08226;A0A1B0GX15;G3UWN5;G3UZM8 [Apolipoprotein E ...]	0	22405700	29574600	8423070	14408700	3659570	3013970	1993340	1051410	1330700	10	27	18387500	23848300	7704170	16219600	1106080	3204470	1968840	1046610	582510	9	22	12	14	4	9	3	4	2	2	1	23.52941176	27.45098039	7.843137255	17.64705882	5.882352941	7.843137255	3.921568627	3.921568627	1.960784314	AFCat1
P08228 [Superoxide dismutase [Cu-Zn] ...]	0	6984570	10269640	86347170	9403970	17759340	34626900	582510	19674770	582510	6	14	7325640	582510	84370000	582510	29421700	43272000	582510	22001070	1928640	6	14	7	1	5	2	4	8	0	4	1	21.875	3.125	15.625	6.25	12.5	25	0	12.5	3.125	AFCat1
P08249;A0A0G2JF23;A0A0G2JGY4 [Malate dehydrogenase, mitochondrial ...]	0	582510	12293900	73836000	582510	5914240	4737970	582510	4759370	582510	6	13	1383400	14385800	60169000	582510	6301270	4734070	582510	6074300	582510	5	15	6	6	9	0	3	4	0	5	0	18.18181818	18.18181818	27.27272727	0	9.090909091	12.12121212	0	15.15151515	0	AFCat1
P08752;A0A0A6YWA9;B2RSH2;A2AE32;P20612;P18872;Q3V3I2;P50149;A2A610;A2AE31;Q8C040;D3Z2M7;Q8BHK8;F6QPU5;Z4YKV1;Q66L47;Q8CGK7;P63094;Q6R0H7 [Guanine nucleotide-binding protein G(i) subunit al ...]	0	582510	20790900	71082000	582510	3180740	582510	582510	582510	582510	8	14	582510	19851500	65791000	582510	2739440	840190	582510	582510	582510	8	14	0	12	13	0	2	1	0	0	0	0	42.85714286	46.42857143	0	7.142857143	3.571428571	0	0	0	AFCat1
P08905;P17897 [Lysozyme C-2;Lysozyme C-1 ...]	0	582510	61088200	281264000	582510	13581870	6690140	582510	582510	582510	3	9	582510	32097370	276724000	3536440	19757100	4320240	582510	582510	582510	3	10	0	5	6	1	5	2	0	0	0	0	26.31578947	31.57894737	5.263157895	26.31578947	10.52631579	0	0	0	AFCat1
P09103;E9Q8G8 [Protein disulfide-isomerase ...]	0	582510	1281130	35223600	582510	3700970	2404240	582510	3030940	582510	6	10	582510	2844640	41119800	582510	4601500	4661170	582510	1467140	582510	7	11	2	2	9	0	5	3	0	2	0	8.695652174	8.695652174	39.13043478	0	21.73913043	13.04347826	0	8.695652174	0	AFCat1
P09405 [Nucleolin ...]	0	582510	582510	20694500	1172280	1431410	4642100	582510	1940640	582510	6	11	582510	1599540	28796500	1175200	1204580	4183900	582510	2050440	582510	5	11	2	1	7	2	3	7	0	2	0	8.333333333	4.166666667	29.16666667	8.333333333	12.5	29.16666667	0	8.333333333	0	AFCat1
P09411;S4R2M7;P09041 [Phosphoglycerate kinase 1;Phosphoglycerate kinase ...]	0	582510	23270000	179362000	582510	582510	3525970	582510	2640340	582510	8	14	582510	25351900	199098000	582510	2192740	2132440	582510	2160340	582510	10	14	2	6	16	0	1	3	0	2	0	6.666666667	20	53.33333333	0	3.333333333	10	0	6.666666667	0	AFCat1
P09528;A0A494BA92;A0A494B9D4;A0A494BAP3 [Ferritin heavy chain;Ferritin heavy chain, N-termi ...]	0	582510	15041300	164480000	582510	582510	582510	582510	582510	582510	7	9	582510	7306470	145856000	582510	582510	582510	582510	582510	582510	5	7	0	5	11	0	0	0	0	0	0	0	31.25	68.75	0	0	0	0	0	0	AFCat1
P09813 [Apolipoprotein A-II;Proapolipoprotein A-II ...]	0	194170	194170	194170	6676700	194170	194170	1762900	194170	194170	1	2	194170	4478900	194170	6124400	5662400	194170	2200600	194170	194170	1	4	0	1	0	2	1	0	2	0	0	0	16.66666667	0	33.33333333	16.66666667	0	33.33333333	0	0	AFCat1
P0DM31 [ ...]	0	1289770	388340	388340	4084970	388340	388340	388340	388340	388340	2	2	194170	194170	194170	1880900	194170	194170	194170	194170	194170	1	1	1	0	0	2	0	0	0	0	0	33.33333333	0	0	66.66666667	0	0	0	0	0	AFCat1
P0DOV2;A0A087WRA4;D0QMC3 [Myeloid cell nuclear differentiation antigen-like ...]	0	194170	194170	5393200	194170	194170	194170	194170	194170	194170	1	1	388340	388340	8893500	388340	388340	388340	388340	388340	388340	2	2	0	0	3	0	0	0	0	0	0	0	0	100	0	0	0	0	0	0	AFCat1
P0DP28;P0DP27;P0DP26;Q3UKW2;A0A3Q4EHJ0;A0A1Y7VK66;Q9D6P8;P20801 [Calmodulin-like protein 3 ...]	0	582510	582510	53872300	582510	582510	19549400	582510	582510	582510	3	6	582510	582510	43200800	582510	582510	16024770	1855240	582510	582510	3	6	0	0	6	0	0	5	1	0	0	0	0	50	0	0	41.66666667	8.333333333	0	0	AFCat1
P10107;A0A494BBD8 [Annexin A1 ...]	0	582510	99090000	452940000	8949170	34654300	10245300	582510	582510	582510	19	36	582510	83107000	433060000	8416370	26918200	10357970	582510	1322290	582510	19	37	1	18	35	4	10	5	0	1	0	1.351351351	24.32432432	47.2972973	5.405405405	13.51351351	6.756756757	0	1.351351351	0	AFCat1
P10126;D3Z3I8;D3YZ68;P62631 [Elongation factor 1-alpha 1;Elongation factor 1-al ...]	0	31722100	73638000	298021000	42660300	50991000	142432000	5777940	67587700	13690370	12	50	31943700	58737000	273135000	31536570	53558000	125049000	5824340	66631700	14235170	11	41	25	14	18	6	7	15	2	15	4	23.58490566	13.20754717	16.98113208	5.660377358	6.603773585	14.1509434	1.886792453	14.1509434	3.773584906	AFCat1
P10605 [Cathepsin B;Cathepsin B light chain;Cathepsin B he ...]	0	194170	194170	7542000	194170	194170	194170	194170	194170	194170	1	1	194170	194170	7735600	194170	194170	194170	194170	194170	194170	1	1	0	0	2	0	0	0	0	0	0	0	0	100	0	0	0	0	0	0	AFCat1
P10639 [Thioredoxin ...]	0	4196770	18771170	51337000	9282870	19455170	25713170	388340	3221270	388340	2	8	582510	15700340	53790900	10800340	16529340	22758340	582510	2659240	582510	3	8	3	2	5	2	2	2	0	2	0	16.66666667	11.11111111	27.77777778	11.11111111	11.11111111	11.11111111	0	11.11111111	0	AFCat1
P10810 [Monocyte differentiation antigen CD14 ...]	0	582510	1802540	57437900	582510	582510	582510	582510	582510	582510	4	5	582510	582510	53420000	582510	582510	582510	582510	582510	582510	4	4	0	1	8	0	0	0	0	0	0	0	11.11111111	88.88888889	0	0	0	0	0	0	AFCat1
P11031 [Activated RNA polymerase II transcriptional coacti ...]	0	194170	194170	2321500	194170	194170	194170	194170	194170	194170	1	1	194170	194170	2673600	194170	194170	194170	194170	194170	194170	1	1	0	0	2	0	0	0	0	0	0	0	0	100	0	0	0	0	0	0	AFCat1
P11247;F7DC05;F8WGZ9;A0A0A0MQL9 [Myeloperoxidase;Myeloperoxidase light chain;Myelop ...]	0	582510	68281000	3.60E+08	4269100	23498900	5173700	582510	582510	582510	17	33	582510	69234000	353812000	3050070	30844300	1778240	582510	582510	582510	15	30	0	14	29	5	11	4	0	0	0	0	22.22222222	46.03174603	7.936507937	17.46031746	6.349206349	0	0	0	AFCat1
P11499;E9PX27;E9Q3D6;D3Z1R1;E9Q0C3 [Heat shock protein HSP 90-beta ...]	0	3113570	13477500	79584000	582510	3876440	41170600	582510	10706600	582510	14	29	4903200	11059300	82175000	2998410	3660240	17538000	582510	16679500	582510	12	26	14	8	14	2	2	15	0	9	0	21.875	12.5	21.875	3.125	3.125	23.4375	0	14.0625	0	AFCat1
P11589 [Major urinary protein 2 ...]	0	376215000	2070680000	50776300	279788000	360515000	268593000	215299000	43324000	170191000	12	58	434020000	2095870000	56369000	264213000	414078000	257301000	205975000	30791700	168933000	12	60	27	23	7	13	15	10	13	8	10	21.42857143	18.25396825	5.555555556	10.31746032	11.9047619	7.936507937	10.31746032	6.349206349	7.936507937	AFCat1
P11679;CON__Q9H552 [Keratin, type II cytoskeletal 8 ...]	0	183111000	293671000	194719000	61031300	114006000	129302000	15490100	77445000	10745900	23	88	188904000	294842000	151714000	26160300	119818000	129791000	42274000	68966000	28149400	24	84	43	18	22	20	18	31	12	21	8	22.27979275	9.32642487	11.39896373	10.3626943	9.32642487	16.06217617	6.21761658	10.88082902	4.14507772	AFCat1
P11680 [Properdin ...]	0	1228400	1970900	3366200	1181600	1095500	194170	194170	194170	194170	1	5	2065070	1949770	2223870	388340	1166810	388340	388340	388340	388340	2	5	3	2	2	1	2	0	0	0	0	30	20	20	10	20	0	0	0	0	AFCat1
P11983 [T-complex protein 1 subunit alpha ...]	0	582510	582510	18640670	582510	582510	2570940	582510	2129940	582510	3	4	388340	388340	4909470	388340	388340	2033570	388340	1633470	388340	2	3	2	0	3	0	0	2	0	2	0	22.22222222	0	33.33333333	0	0	22.22222222	0	22.22222222	0	AFCat1
P12246 [Serum amyloid P-component ...]	0	194170	3617000	194170	194170	194170	194170	194170	194170	194170	1	1	1218900	194170	194170	194170	194170	194170	194170	194170	194170	1	1	1	1	0	0	0	0	0	0	0	50	50	0	0	0	0	0	0	0	AFCat1
P12787 [Cytochrome c oxidase subunit 5A, mitochondrial ...]	0	194170	194170	9956300	194170	194170	194170	194170	194170	194170	1	1	194170	194170	10242000	194170	194170	194170	194170	194170	194170	1	1	0	0	2	0	0	0	0	0	0	0	0	100	0	0	0	0	0	0	AFCat1
P12970 [60S ribosomal protein L7a ...]	0	582510	582510	17003870	582510	2551840	1764540	582510	1752880	582510	4	6	388340	388340	6985170	388340	388340	1689870	388340	388340	388340	2	2	2	0	3	0	1	2	0	2	0	20	0	30	0	10	20	0	20	0	AFCat1
P13020;A0A0J9YUQ8;CON__Q3SX14;A6PWS5;A0A0J9YUJ8 [Gelsolin ...]	0	41449000	74997000	151086000	36894800	34439300	58437000	8500170	14016500	6691840	14	59	43384000	73544000	138764000	40372700	33650500	73879000	13187600	20311200	9192900	14	64	26	23	20	14	11	18	7	9	4	19.6969697	17.42424242	15.15151515	10.60606061	8.333333333	13.63636364	5.303030303	6.818181818	3.03030303	AFCat1
P13634;D3YYQ4 [Carbonic anhydrase 1 ...]	0	582510	582510	15143600	582510	18383900	582510	582510	582510	582510	5	7	582510	582510	5312040	582510	8274770	582510	582510	582510	582510	3	3	0	0	4	0	6	0	0	0	0	0	0	40	0	60	0	0	0	0	AFCat1
P14069 [Protein S100-A6 ...]	0	57968170	41527340	141908340	116268170	114471170	512994170	60981170	199591900	60796170	3	17	74867000	103739000	136934170	123263000	115537000	604950000	26149170	238154000	63404000	2	16	9	3	2	4	4	4	3	5	4	23.68421053	7.894736842	5.263157895	10.52631579	10.52631579	10.52631579	7.894736842	13.15789474	10.52631579	AFCat1
P14115 [60S ribosomal protein L27a ...]	0	194170	2584400	194170	194170	1393000	7516000	194170	6473400	194170	1	4	194170	2853700	194170	194170	1183600	6886200	194170	5763600	194170	1	4	2	2	0	0	2	2	0	2	0	20	20	0	0	20	20	0	20	0	AFCat1
P14131 [40S ribosomal protein S16 ...]	0	582510	2627100	20464570	582510	582510	2579240	582510	1393240	582510	3	6	582510	3430840	34134900	582510	582510	2555640	582510	582510	582510	4	6	1	3	6	0	0	2	0	1	0	7.692307692	23.07692308	46.15384615	0	0	15.38461538	0	7.692307692	0	AFCat1
P14148;F6XI62 [60S ribosomal protein L7 ...]	0	582510	582510	14719340	582510	582510	1291400	582510	5618770	582510	3	4	194170	194170	7783300	194170	194170	194170	194170	194170	194170	1	1	2	0	2	0	0	1	0	2	0	28.57142857	0	28.57142857	0	0	14.28571429	0	28.57142857	0	AFCat1
P14152 [Malate dehydrogenase, cytoplasmic ...]	0	582510	3099940	26786770	3383970	3371740	582510	582510	2036040	582510	4	7	582510	582510	44065000	2983140	3569940	6629270	582510	1609740	582510	4	8	2	1	5	3	2	2	0	2	0	11.76470588	5.882352941	29.41176471	17.64705882	11.76470588	11.76470588	0	11.76470588	0	AFCat1
P14206;A0A1L1SRW0;A0A1L1SUK3 [40S ribosomal protein SA ...]	0	388340	388340	4100570	388340	388340	1679570	388340	388340	388340	2	2	582510	582510	14851000	582510	582510	1829940	582510	582510	582510	4	4	0	0	4	0	0	2	0	0	0	0	0	66.66666667	0	0	33.33333333	0	0	0	AFCat1
P14211 [Calreticulin ...]	0	582510	582510	33978870	582510	16387770	582510	582510	582510	582510	3	4	1739340	4513940	49548800	582510	1566840	582510	582510	582510	582510	4	6	1	1	5	0	3	0	0	0	0	10	10	50	0	30	0	0	0	0	AFCat1
P14602;D3YZ06 [Heat shock protein beta-1 ...]	0	582510	582510	582510	1214880	582510	4583000	582510	5303870	582510	4	6	194170	194170	194170	194170	194170	1094400	194170	1122700	194170	1	2	3	0	0	1	0	4	0	3	0	27.27272727	0	0	9.090909091	0	36.36363636	0	27.27272727	0	AFCat1
P14685;F7B7L8 [26S proteasome non-ATPase regulatory subunit 3 ...]	0	582510	582510	7618470	582510	582510	1019150	582510	582510	582510	3	3	582510	582510	6646970	582510	582510	1075650	582510	582510	582510	3	3	0	0	4	0	0	2	0	0	0	0	0	66.66666667	0	0	33.33333333	0	0	0	AFCat1
P14733;A0A0R4J0Q5;P21619 [Lamin-B1 ...]	0	582510	4615270	25607600	968940	1221840	582510	582510	582510	582510	8	9	582510	4119670	20261300	582510	582510	582510	582510	582510	582510	6	7	0	4	10	1	1	0	0	0	0	0	25	62.5	6.25	6.25	0	0	0	0	AFCat1
P15864;P43277;I7HFT9;Q07133 [Histone H1.2;Histone H1.3 ...]	0	9404470	410317000	1168310000	32864600	212785000	63204000	2266440	7347500	1442240	11	40	16560500	394345000	1181350000	29740400	226552000	55578000	2354140	7884000	1557140	11	42	12	14	14	8	18	12	2	7	2	13.48314607	15.73033708	15.73033708	8.988764045	20.2247191	13.48314607	2.247191011	7.865168539	2.247191011	AFCat1
P15947;A0A0U1RPN5;P15945;P00757;Q61759;P15946 [Kallikrein-1 ...]	0	10735270	83936000	582510	7048870	60709500	11640550	1872840	1486940	24207370	7	21	5989340	83926000	582510	7159970	18979400	15382870	10255940	1349150	18641340	6	18	5	13	0	4	6	6	2	2	3	12.19512195	31.70731707	0	9.756097561	14.63414634	14.63414634	4.87804878	4.87804878	7.317073171	AFCat1
P16015 [Carbonic anhydrase 3 ...]	0	4635970	11024300	8311340	18333900	2534840	1995240	582510	4785040	582510	3	12	3027540	7610570	9312740	13001900	3440540	1859340	582510	4250240	582510	4	10	5	5	2	6	2	2	0	2	0	20.83333333	20.83333333	8.333333333	25	8.333333333	8.333333333	0	8.333333333	0	AFCat1
P16045 [Galectin-1 ...]	0	4552070	6579070	46723800	4016170	582510	582510	582510	582510	582510	3	9	4092770	4564070	37535000	2041140	582510	582510	582510	582510	582510	3	8	4	4	6	3	0	0	0	0	0	23.52941176	23.52941176	35.29411765	17.64705882	0	0	0	0	0	AFCat1
P16125;A0A0N4SVV8;D3Z7F0 [L-lactate dehydrogenase B chain;L-lactate dehydrog ...]	0	3332670	6698900	2680640	582510	1607040	50738000	582510	22068100	1223450	4	15	2909630	9024500	582510	3906970	582510	50397000	582510	20291800	582510	5	14	10	6	1	2	1	8	0	6	1	28.57142857	17.14285714	2.857142857	5.714285714	2.857142857	22.85714286	0	17.14285714	2.857142857	AFCat1
P17156 [Heat shock-related 70 kDa protein 2 ...]	0	5138040	18779600	96260000	12058340	3472240	18072870	1573840	16841340	2311140	5	15	4730940	17767100	108817000	3935940	3820140	19434700	582510	15148340	582510	6	15	4	6	9	2	2	5	1	2	1	12.5	18.75	28.125	6.25	6.25	15.625	3.125	6.25	3.125	AFCat1
P17182;Q6PHC1;B1ARR7;B0QZL1;A0A0N4SUI6;B1ARR6;Q5SX61;Q5SX60;D3YVD3;D3Z2S4;J3QPZ9;Q5SX59;D3Z6E4;A0A0N4SUX5;P17183 [Alpha-enolase ...]	0	582510	36027300	152629000	8594540	23145200	15349170	582510	582510	582510	10	19	1663740	32550300	206285000	582510	21280400	7215770	582510	582510	582510	12	23	1	11	17	1	8	4	0	0	0	2.380952381	26.19047619	40.47619048	2.380952381	19.04761905	9.523809524	0	0	0	AFCat1
P17563;Q63836;G3UYY2;A0A0R4J135;D6RHN2 [Selenium-binding protein 1;Selenium-binding protei ...]	0	194170	194170	5634700	194170	194170	194170	194170	194170	194170	1	1	582510	582510	7433670	582510	1210450	582510	582510	582510	582510	3	3	0	0	3	0	1	0	0	0	0	0	0	75	0	25	0	0	0	0	AFCat1
P17742;A0A1L1SST0;V9GXC1;V9GX31 [Peptidyl-prolyl cis-trans isomerase A;Peptidyl-pro ...]	0	6972270	55063000	175195000	3380140	2512240	26731800	582510	5181140	582510	5	15	3961640	40237000	109809170	4431940	582510	25947600	582510	4524540	582510	4	11	5	7	5	2	1	6	0	2	0	17.85714286	25	17.85714286	7.142857143	3.571428571	21.42857143	0	7.142857143	0	AFCat1
P17751;H7BXC3 [Triosephosphate isomerase ...]	0	1448440	10131200	58111000	2400440	27370300	30730600	582510	8864770	582510	7	21	2289870	10181500	49834000	1975540	10020970	27027270	582510	8858800	2221440	8	24	9	10	12	2	5	6	0	6	1	17.64705882	19.60784314	23.52941176	3.921568627	9.803921569	11.76470588	0	11.76470588	1.960784314	AFCat1
P19221;H7BX99;CON__P00735 [Prothrombin;Activation peptide fragment 1;Activati ...]	0	16045800	23096400	8281940	10263400	8426200	1945740	582510	582510	2966640	7	20	17272200	22842700	8892140	4214070	8092900	582510	582510	582510	1224990	6	19	11	12	2	5	6	1	0	0	2	28.20512821	30.76923077	5.128205128	12.82051282	15.38461538	2.564102564	0	0	5.128205128	AFCat1
P19783 [Cytochrome c oxidase subunit 4 isoform 1, mitochon ...]	0	388340	1925470	21106700	388340	388340	388340	388340	7077900	388340	2	5	388340	3608900	18044200	388340	388340	388340	388340	2983070	388340	2	5	3	3	4	0	0	0	0	3	0	23.07692308	23.07692308	30.76923077	0	0	0	0	23.07692308	0	AFCat1
P20029 [78 kDa glucose-regulated protein ...]	0	582510	2484940	59343000	13494870	582510	582510	582510	3167970	582510	8	11	582510	3848570	40253200	582510	582510	582510	582510	1812500	582510	7	9	4	3	11	2	0	0	0	4	0	16.66666667	12.5	45.83333333	8.333333333	0	0	0	16.66666667	0	AFCat1
P20065 [Thymosin beta-4;Hematopoietic system regulatory pe ...]	0	4560040	96100000	137949000	9056540	62556500	55457000	582510	9873840	582510	3	15	4313440	96452000	135244000	582510	37170970	49563000	1866940	9839840	582510	3	14	4	6	6	1	5	6	1	2	0	12.90322581	19.35483871	19.35483871	3.225806452	16.12903226	19.35483871	3.225806452	6.451612903	0	AFCat1
P20152;A0A0A6YWC8;A2AKJ2;P31001;D3YZ35;A0A0R4J036;P46660;P08551;P08553 [Vimentin ...]	0	42112870	75864000	287477000	47824400	107222800	92107170	582510	9540040	1949440	24	54	37788170	66154100	255806000	11505000	112004500	81607170	18939170	582510	19749340	22	51	5	28	41	6	17	4	2	1	2	4.716981132	26.41509434	38.67924528	5.660377358	16.03773585	3.773584906	1.886792453	0.943396226	1.886792453	AFCat1
P20918;CON__P06868 [Plasminogen;Plasmin heavy chain A;Activation pepti ...]	0	29008100	59657000	67415000	12051800	12349100	4989100	4077140	582510	582510	19	43	30752700	57117000	69880000	18579500	16479000	2105600	4244070	582510	582510	18	46	18	29	12	13	8	6	3	0	0	20.2247191	32.58426966	13.48314607	14.60674157	8.988764045	6.741573034	3.370786517	0	0	AFCat1
P21550 [Beta-enolase ...]	0	388340	9252470	79073170	1316270	388340	388340	388340	388340	388340	2	3	1469570	6370470	161767000	388340	388340	388340	388340	388340	388340	2	4	1	2	3	1	0	0	0	0	0	14.28571429	28.57142857	42.85714286	14.28571429	0	0	0	0	0	AFCat1
P21614;A0A0G2JGM6 [Vitamin D-binding protein ...]	0	68922000	99805000	148282000	35381300	16238700	4207670	3400470	3087880	2834570	10	42	59136000	88566000	151772000	38211000	12577800	5513070	3613070	582510	3847150	10	38	19	18	11	12	7	4	4	2	5	23.17073171	21.95121951	13.41463415	14.63414634	8.536585366	4.87804878	4.87804878	2.43902439	6.097560976	AFCat1
P21981;G3UXE8 [Protein-glutamine gamma-glutamyltransferase 2 ...]	0	582510	582510	29451800	582510	582510	582510	582510	582510	582510	3	3	388340	388340	18928700	388340	388340	388340	388340	388340	388340	2	2	0	0	5	0	0	0	0	0	0	0	0	100	0	0	0	0	0	0	AFCat1
P22599 [Alpha-1-antitrypsin 1-2 ...]	0	618612000	800410000	1187780000	378811700	167969800	142544000	130637000	35614600	81240170	8	39	653412000	850740000	850630000	388925000	158811170	135752170	145560000	36662200	85536770	9	36	19	14	14	7	5	5	7	6	4	23.45679012	17.28395062	17.28395062	8.641975309	6.172839506	6.172839506	8.641975309	7.407407407	4.938271605	AFCat1
P23530 [ ...]	0	388340	388340	388340	2965700	849940	388340	388340	388340	388340	2	3	194170	194170	194170	975520	618620	194170	194170	194170	194170	1	2	0	0	0	3	2	0	0	0	0	0	0	0	60	40	0	0	0	0	AFCat1
P23953;D3Z5G7;A0A1D5RM42;Q8VCT4;E9PYP1;Q8VCC2 [Carboxylesterase 1C ...]	0	74632000	76362000	202252000	37859500	23328300	11705300	7833340	1703940	6140270	10	33	77612000	108349000	207652000	37513600	20500600	8931040	10216770	3847470	6261170	8	29	12	11	10	12	6	4	3	3	4	18.46153846	16.92307692	15.38461538	18.46153846	9.230769231	6.153846154	4.615384615	4.615384615	6.153846154	AFCat1
P24270;A2AL20 [Catalase ...]	0	194170	194170	194170	194170	1800800	194170	194170	194170	194170	1	1	194170	194170	5174300	194170	194170	194170	194170	194170	194170	1	1	0	0	1	0	1	0	0	0	0	0	0	50	0	50	0	0	0	0	AFCat1
P24369 [Peptidyl-prolyl cis-trans isomerase B ...]	0	194170	194170	6995500	194170	194170	2793100	194170	2867400	194170	1	3	194170	194170	6161100	194170	194170	194170	194170	2468000	194170	1	2	2	0	2	0	0	1	0	2	0	28.57142857	0	28.57142857	0	0	14.28571429	0	28.57142857	0	AFCat1
P24472;A0A1L1SS61 [Glutathione S-transferase A4 ...]	0	15637300	19485500	9384540	25653500	37263000	148652000	11318800	114136000	15896300	8	35	21536300	18514600	17827970	24144800	37780300	148060000	11125800	114224000	15442300	6	36	21	6	3	8	7	12	6	14	8	24.70588235	7.058823529	3.529411765	9.411764706	8.235294118	14.11764706	7.058823529	16.47058824	9.411764706	AFCat1
P24527 [Leukotriene A-4 hydrolase ...]	0	582510	16328000	113942000	1325580	4018230	2781170	582510	582510	582510	10	19	582510	23111300	103117000	1273820	905140	3594720	582510	582510	582510	11	19	0	10	18	2	3	5	0	0	0	0	26.31578947	47.36842105	5.263157895	7.894736842	13.15789474	0	0	0	AFCat1
P25322 [G1/S-specific cyclin-D1 ...]	0	194170	737750	194170	194170	194170	194170	194170	194170	194170	1	1	194170	999180	194170	194170	194170	194170	194170	194170	194170	1	1	0	2	0	0	0	0	0	0	0	0	100	0	0	0	0	0	0	0	AFCat1
P25444;D3YVC1;D3YWJ3 [40S ribosomal protein S2 ...]	0	388340	388340	8422470	388340	388340	2105470	388340	388340	388340	2	2	388340	388340	15819100	388340	388340	388340	388340	388340	388340	2	2	0	0	3	0	0	1	0	0	0	0	0	75	0	0	25	0	0	0	AFCat1
P26039;A2AIM2;E9PUM4;A0A1L1SQ51;Q8CDM9;Q71LX4;F6SX70;A0A1L1SRI1;F6S1V7;A0A1L1SQP9 [Talin-1 ...]	0	582510	11050500	58285000	582510	7422500	2168480	582510	582510	582510	20	35	582510	9818900	61342000	582510	8506000	1930920	582510	582510	582510	24	37	0	20	35	0	11	6	0	0	0	0	27.77777778	48.61111111	0	15.27777778	8.333333333	0	0	0	AFCat1
P26040 [Ezrin ...]	0	582510	11089000	184440000	582510	2303540	14885900	582510	5904670	582510	17	24	582510	19905100	188560000	1145990	4048070	8008100	582510	1164640	582510	13	22	3	9	17	1	3	13	0	3	0	6.12244898	18.36734694	34.69387755	2.040816327	6.12244898	26.53061224	0	6.12244898	0	AFCat1
P26041;Q7TSG6 [Moesin ...]	0	582510	16808800	184440000	582510	1612940	582510	582510	582510	582510	19	26	582510	17281100	188560000	3642740	1533640	582510	582510	582510	582510	18	25	0	15	33	1	2	0	0	0	0	0	29.41176471	64.70588235	1.960784314	3.921568627	0	0	0	0	AFCat1
P26262 [Plasma kallikrein;Plasma kallikrein heavy chain;Pl ...]	0	4696600	3200840	9342040	582510	582510	582510	582510	582510	582510	3	5	2404200	2724370	7822070	388340	388340	388340	388340	388340	388340	2	4	5	2	2	0	0	0	0	0	0	55.55555556	22.22222222	22.22222222	0	0	0	0	0	0	AFCat1
P26350;A0A087WP98;A0A087WPN6;A0A087WQN2 [Prothymosin alpha;Prothymosin alpha, N-terminally ...]	0	388340	388340	16772200	1308470	388340	16955300	388340	388340	388340	2	5	388340	388340	9497270	1356770	388340	3504770	388340	388340	388340	2	3	0	0	3	2	0	3	0	0	0	0	0	37.5	25	0	37.5	0	0	0	AFCat1
P26443 [Glutamate dehydrogenase 1, mitochondrial ...]	0	388340	1359070	4741770	388340	2350700	971280	388340	979210	388340	2	6	582510	1387010	8160370	582510	1522340	1224010	582510	1257640	582510	3	6	2	2	3	0	3	2	0	2	0	14.28571429	14.28571429	21.42857143	0	21.42857143	14.28571429	0	14.28571429	0	AFCat1
P26516 [26S proteasome non-ATPase regulatory subunit 7 ...]	0	194170	194170	6016700	194170	194170	194170	194170	194170	194170	1	1	388340	388340	9667600	388340	388340	388340	388340	388340	388340	2	2	0	0	3	0	0	0	0	0	0	0	0	100	0	0	0	0	0	0	AFCat1
P27005 [Protein S100-A8 ...]	0	388340	29334170	1691094170	388340	8560970	388340	388340	388340	388340	2	3	388340	27782170	1726356000	388340	388340	388340	388340	388340	388340	2	3	0	2	3	0	1	0	0	0	0	0	33.33333333	50	0	16.66666667	0	0	0	0	AFCat1
P27048;P63163;A0A0G2JGN4 [Small nuclear ribonucleoprotein-associated protein ...]	0	388340	388340	15680900	388340	388340	388340	388340	388340	388340	2	2	388340	388340	15918800	388340	388340	388340	388340	388340	388340	2	2	0	0	4	0	0	0	0	0	0	0	0	100	0	0	0	0	0	0	AFCat1
P27773;F6Q404 [Protein disulfide-isomerase A3 ...]	0	1283890	7941270	55137000	582510	3485340	1513810	582510	3597170	582510	8	15	582510	8456900	44858000	1131650	582510	1264370	582510	3786870	582510	6	13	5	6	12	1	1	3	0	4	0	15.625	18.75	37.5	3.125	3.125	9.375	0	12.5	0	AFCat1
P28293 [Cathepsin G ...]	0	582510	9743170	48462900	582510	582510	582510	582510	582510	582510	3	5	388340	5538970	43514300	768290	3005170	388340	388340	388340	388340	2	5	0	3	5	1	1	0	0	0	0	0	30	50	10	10	0	0	0	0	AFCat1
P28650;J3QN31 [Adenylosuccinate synthetase isozyme 1 ...]	0	388340	388340	8925770	388340	1290370	388340	388340	388340	388340	2	2	194170	194170	8004700	194170	194170	194170	194170	194170	194170	1	1	0	0	2	0	1	0	0	0	0	0	0	66.66666667	0	33.33333333	0	0	0	0	AFCat1
P28665;P28666;A0A0N4SVU1;CON__ENSEMBL:ENSBTAP00000024146 [Murinoglobulin-1 ...]	0	28645300	55813000	161661000	28416300	8962600	1626040	5692170	582510	582510	18	40	21179400	50068000	133399000	23432600	2768640	1544940	6632970	582510	2337440	15	38	12	19	25	11	4	2	4	0	1	15.38461538	24.35897436	32.05128205	14.1025641	5.128205128	2.564102564	5.128205128	0	1.282051282	AFCat1
P28867;Q1MX41;Q1MX43;Q1MX40;Q1MX42;F8WGT6;Q02111 [Protein kinase C delta type;Protein kinase C delta ...]	0	388340	1277070	5153300	388340	388340	388340	388340	388340	388340	2	3	194170	194170	2438300	194170	194170	194170	194170	194170	194170	1	1	0	1	3	0	0	0	0	0	0	0	25	75	0	0	0	0	0	0	AFCat1
P29351 [Tyrosine-protein phosphatase non-receptor type 6 ...]	0	582510	5882370	68399000	582510	582510	582510	582510	582510	582510	5	6	582510	2240940	56091500	582510	1485340	582510	582510	582510	582510	4	5	0	3	7	0	1	0	0	0	0	0	27.27272727	63.63636364	0	9.090909091	0	0	0	0	AFCat1
P29595 [NEDD8 ...]	0	388340	388340	13011700	388340	388340	388340	388340	388340	388340	2	2	388340	388340	11594600	388340	388340	388340	388340	388340	388340	2	2	0	0	4	0	0	0	0	0	0	0	0	100	0	0	0	0	0	0	AFCat1
P29699;A0A338P703;A0A338P7G1;A0A338P7H5;A0A338P692;A0A338P6Y6;CON__P12763 [Alpha-2-HS-glycoprotein ...]	0	43688600	164654000	10638340	24593690	10253860	9384740	2370740	582510	582510	6	16	20795500	136488000	28825170	21548170	17854340	9706540	582510	582510	582510	5	14	6	11	3	4	3	2	1	0	0	20	36.66666667	10	13.33333333	10	6.666666667	3.333333333	0	0	AFCat1
P29788 [Vitronectin ...]	0	22079000	19363570	16728470	7652000	4091940	4431970	1824940	582510	582510	5	20	22629100	13310470	10434340	7072300	2042040	4353370	582510	582510	582510	6	15	10	5	3	8	4	4	1	0	0	28.57142857	14.28571429	8.571428571	22.85714286	11.42857143	11.42857143	2.857142857	0	0	AFCat1
P30115;Q6P8Q0;P13745;A0A087WQI6;D3Z6A6;D3YZV3;P10648 [Glutathione S-transferase A3;Glutathione S-transfe ...]	0	4752740	6118140	582510	6885340	9318440	40955770	5233840	39713600	6516440	4	11	5819770	5273070	7776970	6726670	8987070	41908200	4623670	35374500	6625670	2	11	7	2	1	2	2	4	2	5	2	25.92592593	7.407407407	3.703703704	7.407407407	7.407407407	14.81481481	7.407407407	18.51851852	7.407407407	AFCat1
P30355;A0A0J9YV38;A0A0J9YUC8 [Arachidonate 5-lipoxygenase-activating protein ...]	0	194170	3774500	25396000	194170	194170	194170	194170	194170	194170	1	2	388340	388340	21003170	388340	2241670	388340	388340	388340	388340	2	2	0	1	2	0	1	0	0	0	0	0	25	50	0	25	0	0	0	0	AFCat1
P30416 [Peptidyl-prolyl cis-trans isomerase FKBP4;Peptidyl ...]	0	194170	194170	194170	194170	194170	1145900	194170	484670	194170	1	2	388340	388340	388340	388340	388340	1162880	388340	643520	388340	2	2	2	0	0	0	0	2	0	2	0	33.33333333	0	0	0	0	33.33333333	0	33.33333333	0	AFCat1
P30681;A0A1B0GQX9 [High mobility group protein B2 ...]	0	582510	50503000	203998000	582510	582510	582510	582510	582510	582510	6	9	582510	30758800	150047000	582510	582510	582510	582510	582510	582510	7	9	0	7	11	0	0	0	0	0	0	0	38.88888889	61.11111111	0	0	0	0	0	0	AFCat1
P31725 [Protein S100-A9 ...]	0	32571340	1187779000	3833026000	64917000	271892000	49052000	5172570	4596440	5292570	12	37	34552340	1241462000	3633840000	45704000	321329000	31714900	3093240	4670240	5742570	11	33	4	12	17	9	11	10	3	2	4	5.555555556	16.66666667	23.61111111	12.5	15.27777778	13.88888889	4.166666667	2.777777778	5.555555556	AFCat1
P32020 [Non-specific lipid-transfer protein ...]	0	194170	194170	194170	194170	194170	1306800	194170	194170	194170	1	1	194170	1267500	194170	194170	194170	1115900	194170	1184000	194170	1	3	1	1	0	0	0	2	0	1	0	20	20	0	0	0	40	0	20	0	AFCat1
P32261;A0A0A6YWH7;CON__P41361;A0A0A6YXS8;A0A0A6YX49;A0A0A6YX70 [Antithrombin-III ...]	0	23423600	46015000	83959000	22547670	11156370	3720170	4508840	2777240	4222570	10	27	21074100	47794000	38765000	28841170	11129470	7742270	5980470	3923670	3164240	11	30	13	15	11	4	4	4	3	3	3	21.66666667	25	18.33333333	6.666666667	6.666666667	6.666666667	5	5	5	AFCat1
P32848 [Parvalbumin alpha ...]	0	388340	388340	388340	1511370	2600170	388340	388340	388340	388340	2	2	388340	388340	388340	2790600	1843170	388340	388340	388340	388340	2	3	0	0	0	3	2	0	0	0	0	0	0	0	60	40	0	0	0	0	AFCat1
P33267;A0A0U1RPL9 [Cytochrome P450 2F2 ...]	0	194170	194170	3105300	194170	194170	194170	194170	194170	194170	1	1	194170	194170	4975300	194170	194170	194170	194170	194170	194170	1	1	0	0	2	0	0	0	0	0	0	0	0	100	0	0	0	0	0	0	AFCat1
P34928 [Apolipoprotein C-I;Truncated apolipoprotein C-I ...]	0	388340	16173170	388340	388340	4047670	388340	388340	388340	388340	2	2	388340	16873170	10630170	388340	3795670	388340	388340	388340	388340	2	3	0	2	1	0	2	0	0	0	0	0	40	20	0	40	0	0	0	0	AFCat1
P35282;A0A1W2P6Z4 [Ras-related protein Rab-21 ...]	0	582510	582510	18624900	582510	582510	582510	582510	582510	582510	3	3	194170	194170	8312500	194170	1949600	1182900	194170	194170	194170	1	3	0	0	4	0	1	1	0	0	0	0	0	66.66666667	0	16.66666667	16.66666667	0	0	0	AFCat1
P35564 [Calnexin ...]	0	582510	582510	23230700	582510	882530	582510	582510	582510	582510	4	4	582510	582510	11675670	582510	821330	582510	582510	582510	582510	3	3	0	0	5	0	2	0	0	0	0	0	0	71.42857143	0	28.57142857	0	0	0	0	AFCat1
P35979 [60S ribosomal protein L12 ...]	0	582510	2901940	10250840	969710	582510	5541970	582510	2037040	582510	3	6	194170	194170	194170	194170	194170	194170	194170	1605400	194170	1	1	2	1	1	1	0	2	0	2	0	22.22222222	11.11111111	11.11111111	11.11111111	0	22.22222222	0	22.22222222	0	AFCat1
P39654 [Arachidonate 15-lipoxygenase ...]	0	194170	194170	5530200	194170	194170	194170	194170	194170	194170	1	1	582510	582510	20861600	582510	582510	582510	582510	582510	582510	3	3	0	0	4	0	0	0	0	0	0	0	0	100	0	0	0	0	0	0	AFCat1
P40124;B1ARS0;D3YTR7;A0A286YCS6;Q9CYT6 [Adenylyl cyclase-associated protein 1 ...]	0	582510	25289500	116113000	3680570	3607530	12302300	1087580	2432740	1260330	10	21	582510	6308840	87599000	1875040	8276200	9782570	984290	2245540	582510	9	16	2	5	13	3	6	5	2	2	1	5.128205128	12.82051282	33.33333333	7.692307692	15.38461538	12.82051282	5.128205128	5.128205128	2.564102564	AFCat1
P40142;A0A286YE28;E0CY51 [Transketolase ...]	0	3145370	92154000	370791000	11429100	32978900	19635200	582510	15573600	582510	17	39	4612400	96963000	356455000	11366400	32604300	16865800	582510	7924830	1910440	18	40	13	17	27	8	7	6	0	8	1	14.94252874	19.54022989	31.03448276	9.195402299	8.045977011	6.896551724	0	9.195402299	1.149425287	AFCat1
P41105 [60S ribosomal protein L28 ...]	0	194170	194170	194170	194170	194170	2667700	194170	194170	194170	1	1	194170	194170	194170	194170	194170	3037100	194170	734700	194170	1	2	1	0	0	0	0	2	0	1	0	25	0	0	0	0	50	0	25	0	AFCat1
P41245 [Matrix metalloproteinase-9 ...]	0	582510	5729070	40440200	582510	1243200	582510	582510	582510	582510	3	6	582510	5717570	41753200	582510	582510	582510	582510	582510	582510	4	6	0	4	7	0	1	0	0	0	0	0	33.33333333	58.33333333	0	8.333333333	0	0	0	0	AFCat1
P42932;H3BL49;H3BJB6;H3BKR8;H3BLL1;H3BKG2 [T-complex protein 1 subunit theta ...]	0	582510	582510	16804500	1294230	2881470	8394700	582510	582510	582510	6	13	582510	1406340	17511400	1362290	1619540	5684600	582510	1286090	582510	5	11	1	1	8	4	3	7	0	1	0	4	4	32	16	12	28	0	4	0	AFCat1
P43274 [Histone H1.4 ...]	0	6997040	348618000	1100977000	32864600	212785000	63204000	2266440	5944500	1442240	7	33	14398370	342362000	1144990000	29740400	226552000	55578000	2354140	5847570	1557140	7	32	8	12	13	6	13	9	2	5	2	11.42857143	17.14285714	18.57142857	8.571428571	18.57142857	12.85714286	2.857142857	7.142857143	2.857142857	AFCat1
P43275 [Histone H1.1 ...]	0	582510	218595200	523147000	12917340	58177800	26304340	582510	3029070	582510	4	13	8073040	206914100	583259000	11045340	59826500	19805050	582510	582510	582510	4	14	3	6	7	2	6	3	0	2	0	10.34482759	20.68965517	24.13793103	6.896551724	20.68965517	10.34482759	0	6.896551724	0	AFCat1
P43276 [Histone H1.5 ...]	0	1357220	38453100	323287000	11085370	79643170	20081600	582510	1088170	582510	5	16	1524540	38285700	361500000	9768170	91351170	17691370	582510	998420	582510	5	16	4	8	7	4	4	5	0	2	0	11.76470588	23.52941176	20.58823529	11.76470588	11.76470588	14.70588235	0	5.882352941	0	AFCat1
P45376;D3YVJ7 [Aldose reductase ...]	0	15945700	19316700	25004370	21323100	17268900	169690000	1919240	52413700	4119740	8	40	15800900	18276700	24338370	14084300	16715600	142932000	4304270	73171700	3933640	9	42	24	12	4	11	11	15	3	14	2	25	12.5	4.166666667	11.45833333	11.45833333	15.625	3.125	14.58333333	2.083333333	AFCat1
P45377;P21300 [Aldose reductase-related protein 2;Aldose reductas ...]	0	2586710	582510	582510	582510	2316540	35661600	582510	4043940	2061240	4	8	1321870	582510	582510	4358670	2378740	26109600	582510	11466300	2097040	5	11	7	0	0	2	2	6	0	4	2	30.43478261	0	0	8.695652174	8.695652174	26.08695652	0	17.39130435	8.695652174	AFCat1
P46412;A0A1C7ZMZ5;A0A1C7ZMZ7 [Glutathione peroxidase 3 ...]	0	194170	6772000	194170	194170	194170	194170	194170	194170	194170	1	1	194170	4761200	194170	194170	194170	194170	194170	194170	194170	1	1	0	2	0	0	0	0	0	0	0	0	100	0	0	0	0	0	0	0	AFCat1
P46467;Q8VEJ9;Q8BPY9 [Vacuolar protein sorting-associated protein 4B;Vac ...]	0	194170	194170	3430700	194170	194170	194170	194170	194170	194170	1	1	194170	194170	2771300	194170	194170	194170	194170	194170	194170	1	1	0	0	2	0	0	0	0	0	0	0	0	100	0	0	0	0	0	0	AFCat1
P47739;B1ATI6 [Aldehyde dehydrogenase, dimeric NADP-preferring ...]	0	582510	582510	582510	582510	582510	12198570	582510	9581750	582510	4	5	388340	388340	388340	388340	388340	2267870	388340	2519770	388340	2	2	4	0	0	0	0	3	0	4	0	36.36363636	0	0	0	0	27.27272727	0	36.36363636	0	AFCat1
P47791 [Glutathione reductase, mitochondrial ...]	0	582510	16449300	87041000	582510	3086040	1103390	582510	582510	582510	4	9	582510	18950500	92850000	582510	7944800	2174960	582510	582510	582510	6	13	0	6	9	0	4	3	0	0	0	0	27.27272727	40.90909091	0	18.18181818	13.63636364	0	0	0	AFCat1
P47911;A0A0J9YU32 [60S ribosomal protein L6 ...]	0	582510	3285140	41177000	2064140	582510	11238400	582510	7924700	582510	6	14	582510	3055140	35304600	582510	3399070	9875300	582510	6098370	582510	5	12	5	2	9	1	2	7	0	5	0	16.12903226	6.451612903	29.03225806	3.225806452	6.451612903	22.58064516	0	16.12903226	0	AFCat1
P47962;D3YYV8 [60S ribosomal protein L5 ...]	0	388340	388340	4610170	388340	388340	388340	388340	749040	388340	2	2	582510	582510	4382440	582510	582510	3222940	582510	929990	582510	3	3	2	0	2	0	0	1	0	2	0	28.57142857	0	28.57142857	0	0	14.28571429	0	28.57142857	0	AFCat1
P47963 [60S ribosomal protein L13 ...]	0	194170	194170	6959200	194170	194170	194170	194170	194170	194170	1	1	194170	194170	7800400	194170	194170	194170	194170	194170	194170	1	1	0	0	2	0	0	0	0	0	0	0	0	100	0	0	0	0	0	0	AFCat1
P48036;A0A0G2JGQ0 [Annexin A5 ...]	0	3213880	8272170	70483000	582510	1799840	3359840	582510	1814620	790210	7	15	3474220	7540500	56797000	582510	2817440	1824240	582510	582510	582510	7	13	6	5	12	0	2	2	0	2	1	20	16.66666667	40	0	6.666666667	6.666666667	0	6.666666667	3.333333333	AFCat1
P48678;D3YUF7 [Prelamin-A/C;Lamin-A/C ...]	0	582510	582510	3266640	582510	582510	2504650	582510	4531000	582510	4	6	582510	582510	582510	582510	582510	2588440	582510	4555300	582510	3	4	6	0	1	0	0	3	0	6	0	37.5	0	6.25	0	0	18.75	0	37.5	0	AFCat1
P48999;E9QA93;E9Q6H6;A0A0N4SW45 [Arachidonate 5-lipoxygenase ...]	0	582510	1800880	15764300	582510	879850	582510	582510	582510	582510	6	8	582510	1288590	17344700	582510	582510	582510	582510	582510	582510	4	5	0	3	9	0	1	0	0	0	0	0	23.07692308	69.23076923	0	7.692307692	0	0	0	0	AFCat1
P49182 [Heparin cofactor 2 ...]	0	194170	1228700	194170	194170	194170	194170	194170	194170	194170	1	1	1629140	7002840	582510	582510	582510	582510	582510	582510	582510	3	4	1	4	0	0	0	0	0	0	0	20	80	0	0	0	0	0	0	0	AFCat1
P49290 [Eosinophil peroxidase;Eosinophil peroxidase light ...]	0	582510	19636500	115211000	582510	582510	582510	582510	582510	582510	12	19	582510	19398900	105818000	582510	582510	582510	582510	582510	582510	14	19	0	13	25	0	0	0	0	0	0	0	34.21052632	65.78947368	0	0	0	0	0	0	AFCat1
P49710;E9Q4E5 [Hematopoietic lineage cell-specific protein ...]	0	582510	2107740	29021500	582510	582510	582510	582510	582510	582510	4	5	582510	1966640	29111800	582510	582510	582510	582510	582510	582510	4	5	0	2	8	0	0	0	0	0	0	0	20	80	0	0	0	0	0	0	AFCat1
P50247;A2ALT5 [Adenosylhomocysteinase ...]	0	1172520	582510	20164600	1266170	1566640	2308210	582510	1460120	582510	3	10	876660	1565240	20145100	1277150	1398240	2194810	582510	1562390	582510	4	11	6	1	6	2	2	4	0	4	0	24	4	24	8	8	16	0	16	0	AFCat1
P50396;D6RI86 [Rab GDP dissociation inhibitor alpha ...]	0	582510	6404470	17551970	582510	582510	5065210	582510	1764740	582510	3	8	388340	2836370	12269170	388340	2972670	3697320	388340	388340	388340	2	5	1	3	3	0	1	5	0	1	0	7.142857143	21.42857143	21.42857143	0	7.142857143	35.71428571	0	7.142857143	0	AFCat1
P50516;D3Z1B9;D3YWH3;D3YZ23 [V-type proton ATPase catalytic subunit A ...]	0	582510	1657740	29791700	582510	582510	582510	582510	582510	582510	4	5	582510	1502740	30175500	582510	582510	582510	582510	582510	582510	5	5	0	2	8	0	0	0	0	0	0	0	20	80	0	0	0	0	0	0	AFCat1
P50543 [Protein S100-A11 ...]	0	388340	5186400	6165470	388340	388340	388340	388340	388340	388340	2	3	194170	194170	5041900	194170	194170	194170	194170	5671300	194170	1	2	1	2	2	0	0	0	0	1	0	16.66666667	33.33333333	33.33333333	0	0	0	0	16.66666667	0	AFCat1
P50580 [Proliferation-associated protein 2G4 ...]	0	194170	194170	2522600	194170	194170	194170	194170	194170	194170	1	1	388340	388340	2878270	388340	388340	1053620	388340	388340	388340	2	2	0	0	2	0	0	1	0	0	0	0	0	66.66666667	0	0	33.33333333	0	0	0	AFCat1
P51150;A0A0N4SVR6;A0A0N4SVG9 [Ras-related protein Rab-7a ...]	0	582510	10734400	58909000	582510	582510	1794340	582510	582510	582510	4	8	582510	8912700	52333600	582510	1759880	1215690	582510	582510	582510	4	10	0	7	7	0	2	2	0	0	0	0	38.88888889	38.88888889	0	11.11111111	11.11111111	0	0	0	AFCat1
P51437 [Cathelin-related antimicrobial peptide ...]	0	194170	16453000	61731000	194170	2298300	1905900	194170	194170	194170	1	4	194170	15912000	61572000	1790200	42092000	1875700	194170	194170	194170	1	5	0	2	2	1	2	2	0	0	0	0	22.22222222	22.22222222	11.11111111	22.22222222	22.22222222	0	0	0	AFCat1
P51881;P48962;Q3V132 [ADP/ATP translocase 2;ADP/ATP translocase 2, N-ter ...]	0	582510	11602200	66186000	1539440	1922140	8174570	582510	7885770	582510	6	14	2130740	12467600	67067000	1398340	1095800	8098770	582510	7326770	582510	6	16	5	8	9	2	2	4	0	4	0	14.70588235	23.52941176	26.47058824	5.882352941	5.882352941	11.76470588	0	11.76470588	0	AFCat1
P51885;CON__Q05443 [Lumican ...]	0	2196870	388340	5752270	1494570	388340	388340	388340	388340	388340	2	3	1898970	5352800	388340	1384470	388340	388340	388340	388340	388340	2	4	2	2	1	2	0	0	0	0	0	28.57142857	28.57142857	14.28571429	28.57142857	0	0	0	0	0	AFCat1
P52480;A0A1L1SU37;A0A1L1SQV8;A0A1L1SUV0;A0A1L1SSN6;A0A1L1STV8;A0A1L1ST52;A0A1L1SVH2;E9Q509;G3X925;P53657 [Pyruvate kinase PKM ...]	0	14713970	83860000	360634000	16919570	33287200	109192000	2803940	17433470	5013770	13	38	4951640	68340000	352776000	18393500	22386800	99024000	2764540	21884700	3263840	15	40	8	13	21	5	11	15	2	5	3	9.638554217	15.6626506	25.30120482	6.024096386	13.25301205	18.07228916	2.409638554	6.024096386	3.614457831	AFCat1
P53810;F8WGG5;J3QQ30;J3QPW1 [Phosphatidylinositol transfer protein alpha isofor ...]	0	194170	194170	2358800	194170	194170	194170	194170	194170	194170	1	1	194170	194170	6137300	194170	194170	194170	194170	194170	194170	1	1	0	0	2	0	0	0	0	0	0	0	0	100	0	0	0	0	0	0	AFCat1
P53994;G3UXQ7;G3V022 [Ras-related protein Rab-2A ...]	0	388340	388340	10426300	388340	388340	388340	388340	388340	388340	2	2	194170	194170	6337000	194170	194170	194170	194170	194170	194170	1	1	0	0	3	0	0	0	0	0	0	0	0	100	0	0	0	0	0	0	AFCat1
P56480;Q831A5 [ATP synthase subunit beta, mitochondrial ...]	0	4485370	18407300	68641000	582510	582510	4879170	582510	12298300	582510	6	17	4512270	17928500	65822000	582510	582510	5575100	582510	11291400	582510	7	19	14	8	9	0	0	5	0	10	0	30.43478261	17.39130435	19.56521739	0	0	10.86956522	0	21.73913043	0	AFCat1
P57096 [Prostate stem cell antigen ...]	0	4965900	9879100	19692000	2467800	194170	10476000	194170	7393800	194170	1	6	5156200	11595000	17278000	194170	194170	10027000	194170	194170	194170	1	4	3	2	2	1	0	2	0	1	0	27.27272727	18.18181818	18.18181818	9.090909091	0	18.18181818	0	9.090909091	0	AFCat1
P58252;G3UXK8;G3UZ34;A2AH85;O08810 [Elongation factor 2 ...]	0	8551600	16301800	94537000	10279400	8807670	37900000	582510	14267900	3631840	18	46	8727570	12642700	79836000	10351500	16385600	32756400	1417840	15788900	3754750	16	44	15	12	19	9	6	25	1	10	3	15	12	19	9	6	25	1	10	3	AFCat1
P59999;Q3TX55;E9PWA7 [Actin-related protein 2/3 complex subunit 4 ...]	0	582510	38895170	45338340	582510	3299440	582510	582510	1541640	582510	4	5	582510	12187170	108967170	582510	582510	582510	582510	1541540	582510	3	5	2	4	3	0	1	0	0	2	0	16.66666667	33.33333333	25	0	8.333333333	0	0	16.66666667	0	AFCat1
P60335 [Poly(rC)-binding protein 1 ...]	0	388340	388340	9764900	1538910	1773670	2875870	388340	1402170	388340	2	7	388340	388340	9256600	1357330	1277970	3955600	388340	1401570	388340	2	8	2	0	4	4	2	3	0	2	0	11.76470588	0	23.52941176	23.52941176	11.76470588	17.64705882	0	11.76470588	0	AFCat1
P60766 [Cell division control protein 42 homolog ...]	0	1010720	8459870	17222170	2181770	9768300	2171970	388340	388340	388340	2	7	388340	8550470	20752200	2207570	5015470	2193870	388340	748290	388340	2	7	2	2	3	2	3	2	0	1	0	13.33333333	13.33333333	20	13.33333333	20	13.33333333	0	6.666666667	0	AFCat1
P60843;Q8BTU6;P10630;E9Q561;A0A338P6X5 [Eukaryotic initiation factor 4A-I ...]	0	1939040	4139640	27144200	1404340	2909870	7266400	582510	5039740	582510	6	13	2078440	6053170	24288600	1360270	3443670	7271500	916130	6666870	582510	4	15	5	3	6	2	4	7	1	3	0	16.12903226	9.677419355	19.35483871	6.451612903	12.90322581	22.58064516	3.225806452	9.677419355	0	AFCat1
P60867 [40S ribosomal protein S20 ...]	0	388340	388340	388340	388340	388340	3240570	388340	2743400	388340	2	3	582510	2913340	11580340	582510	1465340	3331040	582510	2811170	582510	3	6	4	1	1	0	1	2	0	4	0	30.76923077	7.692307692	7.692307692	0	7.692307692	15.38461538	0	30.76923077	0	AFCat1
P61027 [Ras-related protein Rab-10 ...]	0	2324270	11160170	48471170	2298470	3754300	8110500	388340	6692300	388340	2	10	2170070	11096170	53176170	2332970	2578570	388340	388340	3983870	388340	2	6	5	2	2	2	3	2	0	3	0	26.31578947	10.52631579	10.52631579	10.52631579	15.78947368	10.52631579	0	15.78947368	0	AFCat1
P61161 [Actin-related protein 2 ...]	0	388340	388340	80723000	388340	388340	388340	388340	388340	388340	2	2	582510	582510	78045700	582510	582510	582510	582510	935970	582510	3	4	1	0	5	0	0	0	0	1	0	14.28571429	0	71.42857143	0	0	0	0	14.28571429	0	AFCat1
P61358;A2A4Q0 [60S ribosomal protein L27 ...]	0	582510	2741840	16782270	2003340	582510	4738740	582510	3024440	582510	3	6	582510	1760640	18911570	1561640	582510	6556670	582510	2977540	582510	3	7	2	2	4	2	0	3	0	2	0	13.33333333	13.33333333	26.66666667	13.33333333	0	20	0	13.33333333	0	AFCat1
P61982 [14-3-3 protein gamma;14-3-3 protein gamma, N-termi ...]	0	582510	39484270	194694600	23630300	33866500	67864070	2839540	582510	6347340	4	15	582510	4759440	32459870	25533900	17614340	73194360	6830870	582510	6334340	5	13	0	3	5	6	4	5	3	0	2	0	10.71428571	17.85714286	21.42857143	14.28571429	17.85714286	10.71428571	0	7.142857143	AFCat1
P62082 [40S ribosomal protein S7 ...]	0	194170	194170	8428700	194170	194170	194170	194170	194170	194170	1	1	388340	388340	7800470	388340	388340	1510270	388340	388340	388340	2	2	0	0	2	0	0	1	0	0	0	0	0	66.66666667	0	0	33.33333333	0	0	0	AFCat1
P62137;A0A0J9YUU8;A0A0G2JFF1;P63087;P62141 [Serine/threonine-protein phosphatase PP1-alpha cat ...]	0	388340	388340	10612000	388340	388340	388340	388340	388340	388340	2	2	194170	1979600	7161900	194170	194170	194170	194170	194170	194170	1	2	0	1	3	0	0	0	0	0	0	0	25	75	0	0	0	0	0	0	AFCat1
P62242 [40S ribosomal protein S8 ...]	0	582510	1537140	24943300	582510	2213540	2294520	582510	2917640	582510	5	9	582510	1669340	9307540	582510	582510	2095240	582510	2996940	582510	3	5	2	2	5	0	1	4	0	2	0	12.5	12.5	31.25	0	6.25	25	0	12.5	0	AFCat1
P62259;F6WA09;D6REF3 [14-3-3 protein epsilon ...]	0	582510	36760500	199015000	20376270	33074600	62433800	2839540	1780840	6347340	6	16	582510	582510	42376170	22350170	19380270	71010300	6830870	582510	6334340	6	12	1	2	5	4	5	6	3	1	2	3.448275862	6.896551724	17.24137931	13.79310345	17.24137931	20.68965517	10.34482759	3.448275862	6.896551724	AFCat1
P62264;D3YVF4;D3Z7I1 [40S ribosomal protein S14 ...]	0	582510	1609840	7206740	1789940	2046040	6420770	582510	3334770	759940	3	9	388340	1425070	388340	1728270	388340	5587600	388340	4200600	388340	2	6	4	2	1	2	1	4	0	4	1	21.05263158	10.52631579	5.263157895	10.52631579	5.263157895	21.05263158	0	21.05263158	5.263157895	AFCat1
P62315 [Small nuclear ribonucleoprotein Sm D1 ...]	0	194170	194170	8404200	194170	194170	194170	194170	1425600	194170	1	2	194170	194170	9899400	194170	194170	194170	194170	194170	194170	1	1	1	0	2	0	0	0	0	1	0	25	0	50	0	0	0	0	25	0	AFCat1
P62320 [Small nuclear ribonucleoprotein Sm D3 ...]	0	388340	388340	21695800	388340	388340	388340	388340	388340	388340	2	2	388340	388340	27880000	388340	388340	388340	388340	388340	388340	2	2	0	0	4	0	0	0	0	0	0	0	0	100	0	0	0	0	0	0	AFCat1
P62702;V9GWY0 [40S ribosomal protein S4, X isoform ...]	0	388340	388340	2565570	388340	388340	4521100	388340	388340	388340	2	3	582510	582510	2734440	582510	582510	6394200	582510	582510	582510	3	4	0	0	2	0	0	5	0	0	0	0	0	28.57142857	0	0	71.42857143	0	0	0	AFCat1
P62737;P63268;A0A494B9T3;D3YZY0;D3Z2K3;A0A0U1RQ96 [Actin, aortic smooth muscle;Actin, gamma-enteric s ...]	0	79753000	824610000	2531040000	231787000	413979000	302581000	44796000	163138000	64568700	12	48	93638000	796670000	2388520000	201508000	310455000	320408000	18362970	164004000	64857700	13	47	16	11	22	10	11	14	5	7	6	15.68627451	10.78431373	21.56862745	9.803921569	10.78431373	13.7254902	4.901960784	6.862745098	5.882352941	AFCat1
P62748;A0A1Y7VMK3 [Hippocalcin-like protein 1 ...]	0	388340	388340	11620000	388340	388340	388340	388340	388340	388340	2	2	388340	388340	12264800	388340	388340	388340	388340	388340	388340	2	2	0	0	4	0	0	0	0	0	0	0	0	100	0	0	0	0	0	0	AFCat1
P62751 [60S ribosomal protein L23a ...]	0	194170	194170	6387900	194170	194170	194170	194170	194170	194170	1	1	194170	194170	4312800	194170	194170	194170	194170	194170	194170	1	1	0	0	2	0	0	0	0	0	0	0	0	100	0	0	0	0	0	0	AFCat1
P62754 [40S ribosomal protein S6 ...]	0	194170	194170	9471500	194170	2154300	194170	194170	2282900	194170	1	3	388340	388340	12823300	1705570	2504470	388340	388340	2313470	388340	2	5	2	0	3	1	2	0	0	2	0	20	0	30	10	20	0	0	20	0	AFCat1
P62806 [Histone H4 ...]	0	43794170	1369430000	5206900000	96218200	321166000	152311000	12297970	78146700	27839200	11	47	56617100	1356730000	5161200000	98879200	355555000	172707000	13031570	109940000	25424500	11	50	19	18	21	7	12	10	4	13	6	17.27272727	16.36363636	19.09090909	6.363636364	10.90909091	9.090909091	3.636363636	11.81818182	5.454545455	AFCat1
P62814 [V-type proton ATPase subunit B, brain isoform ...]	0	194170	194170	3154500	194170	194170	194170	194170	194170	194170	1	1	194170	194170	3364200	194170	194170	194170	194170	194170	194170	1	1	0	0	2	0	0	0	0	0	0	0	0	100	0	0	0	0	0	0	AFCat1
P62827;Q14AA6;Q61820 [GTP-binding nuclear protein Ran ...]	0	1384920	5023640	60562000	2056440	3319240	5608140	582510	582510	582510	3	8	1174780	5346870	30141000	1968670	2874570	388340	661250	388340	388340	2	7	2	2	5	2	2	1	1	0	0	13.33333333	13.33333333	33.33333333	13.33333333	13.33333333	6.666666667	6.666666667	0	0	AFCat1
P62830;A2A6F8 [60S ribosomal protein L23 ...]	0	194170	194170	6634800	194170	194170	194170	194170	194170	194170	1	1	194170	194170	194170	194170	194170	917180	194170	194170	194170	1	1	0	0	1	0	0	1	0	0	0	0	0	50	0	0	50	0	0	0	AFCat1
P62855 [40S ribosomal protein S26 ...]	0	388340	388340	10970000	1529870	388340	388340	388340	3516970	388340	2	4	194170	194170	3796600	194170	194170	194170	194170	194170	194170	1	1	1	0	3	1	0	0	0	1	0	16.66666667	0	50	16.66666667	0	0	0	16.66666667	0	AFCat1
P62908;D3YV43;A0A140LI77 [40S ribosomal protein S3 ...]	0	582510	2806840	38168400	1736540	12400370	13852900	582510	4287470	582510	8	16	582510	582510	31726870	582510	582510	6105970	582510	6945700	582510	3	7	5	1	7	1	2	7	0	5	0	17.85714286	3.571428571	25	3.571428571	7.142857143	25	0	17.85714286	0	AFCat1
P62918 [60S ribosomal protein L8 ...]	0	388340	1917570	8446870	2215370	2803800	6575100	388340	4405900	388340	2	9	388340	2868400	16174200	3121910	1440170	4917670	388340	3849600	388340	2	10	4	3	3	3	3	3	0	4	0	17.39130435	13.04347826	13.04347826	13.04347826	13.04347826	13.04347826	0	17.39130435	0	AFCat1
P62962;Q5SX49;CON__P02584 [Profilin-1;Profilin ...]	0	582510	9818600	283292000	8659140	4528470	24145710	582510	4191340	582510	6	14	582510	12613500	277645000	582510	1817340	1322270	582510	582510	582510	6	11	1	6	11	1	3	3	0	1	0	3.846153846	23.07692308	42.30769231	3.846153846	11.53846154	11.53846154	0	3.846153846	0	AFCat1
P63028;D3YU75 [Translationally-controlled tumor protein ...]	0	388340	388340	28456000	388340	388340	388340	388340	388340	388340	2	2	388340	2965870	27917400	388340	388340	388340	388340	388340	388340	2	3	0	1	4	0	0	0	0	0	0	0	20	80	0	0	0	0	0	0	AFCat1
P63038 [60 kDa heat shock protein, mitochondrial ...]	0	582510	582510	5745640	582510	2671270	3465770	582510	2737860	582510	3	7	582510	582510	4324740	1083350	2478950	2164640	582510	2397940	582510	3	6	3	0	2	1	4	3	0	3	0	18.75	0	12.5	6.25	25	18.75	0	18.75	0	AFCat1
P63101;A0A2I3BQ03;D3YXN6;D3YXF4;D3YW45 [14-3-3 protein zeta/delta ...]	0	582510	57662600	248307000	24036500	46362000	104904000	2839540	4798970	6347340	9	35	582510	28054700	93661000	24821200	42251000	77893200	6830870	24284900	6334340	9	33	7	9	12	9	13	13	3	7	2	9.333333333	12	16	12	17.33333333	17.33333333	4	9.333333333	2.666666667	AFCat1
P63260;P60710;E9Q5F4;G3UZ07;E9Q1F2;G3UYG0;E9Q606;A0A1D5RM20;B1ATY1;Q8BFZ3;F8WGM8;E9Q2D1;F6WX90;V9GXQ2 [Actin, cytoplasmic 2;Actin, cytoplasmic 2, N-termi ...]	0	98616000	831360000	2728660000	231787000	468690000	302883000	44796000	180879000	68380500	15	66	109372000	810360000	2541340000	206382000	392318000	327755000	26865900	181222000	69034600	17	67	28	21	28	12	14	13	8	15	9	18.91891892	14.18918919	18.91891892	8.108108108	9.459459459	8.783783784	5.405405405	10.13513514	6.081081081	AFCat1
P63325;A0A338P731;Q3UW83;A0A338P7K4;A0A3B2W864 [40S ribosomal protein S10 ...]	0	582510	582510	21661000	582510	582510	1455940	582510	1566740	582510	3	5	388340	388340	17307100	388340	388340	388340	388340	1359970	388340	2	3	2	0	5	0	0	1	0	2	0	20	0	50	0	0	10	0	20	0	AFCat1
P63328 [Serine/threonine-protein phosphatase 2B catalytic ...]	0	194170	194170	4891300	194170	194170	194170	194170	194170	194170	1	1	194170	194170	4831500	194170	194170	194170	194170	194170	194170	1	1	0	0	2	0	0	0	0	0	0	0	0	100	0	0	0	0	0	0	AFCat1
P68040 [Guanine nucleotide-binding protein subunit beta-2- ...]	0	582510	582510	6999140	582510	582510	3175340	582510	3906190	582510	4	4	582510	582510	7241040	582510	582510	2917140	582510	2634040	582510	3	3	3	0	2	0	0	2	0	3	0	30	0	20	0	0	20	0	30	0	AFCat1
P68134;P68033 [Actin, alpha skeletal muscle;Actin, alpha cardiac ...]	0	79753000	824610000	2531040000	231787000	413979000	302581000	44796000	163138000	64568700	12	49	93638000	796670000	2388520000	201508000	310455000	320408000	18362970	164004000	64857700	14	49	16	13	23	10	11	14	5	7	6	15.23809524	12.38095238	21.9047619	9.523809524	10.47619048	13.33333333	4.761904762	6.666666667	5.714285714	AFCat1
P68254 [14-3-3 protein theta ...]	0	582510	36400510	192996400	20376270	32000060	66036710	2839540	582510	6347340	6	15	582510	1026870	24181340	22350170	18028490	71069570	6830870	582510	6334340	5	11	0	3	4	4	5	5	3	0	2	0	11.53846154	15.38461538	15.38461538	19.23076923	19.23076923	11.53846154	0	7.692307692	AFCat1
P68369;P05214 [Tubulin alpha-1A chain;Tubulin alpha-3 chain ...]	0	8380770	34498200	187674000	11429570	16718600	33712600	1212740	582510	1447340	8	24	10458400	34894000	192148000	13307900	19565670	17621200	1261110	18795700	1407040	7	28	8	8	10	6	6	10	2	3	2	14.54545455	14.54545455	18.18181818	10.90909091	10.90909091	18.18181818	3.636363636	5.454545455	3.636363636	AFCat1
P68373;P05213;A0A2R8VHF3;Q9JJZ2;Q3UX10 [Tubulin alpha-1C chain;Tubulin alpha-1B chain;Tubu ...]	0	8380770	34498200	187674000	11429570	16718600	33712600	1212740	582510	1447340	8	25	10458400	34894000	192148000	13307900	19565670	17621200	1261110	18795700	1407040	8	30	8	8	11	6	6	12	2	3	2	13.79310345	13.79310345	18.96551724	10.34482759	10.34482759	20.68965517	3.448275862	5.172413793	3.448275862	AFCat1
P68510 [14-3-3 protein eta ...]	0	582510	35966340	185598170	20376270	32408000	60223290	2839540	582510	6347340	5	13	582510	1393340	28534470	22350170	18425470	66183440	6830870	582510	6334340	4	12	0	2	4	4	6	4	3	0	2	0	8	16	16	24	16	12	0	8	AFCat1
P70168 [Importin subunit beta-1 ...]	0	388340	388340	6864400	388340	388340	388340	388340	388340	388340	2	2	194170	194170	5995500	194170	194170	194170	194170	194170	194170	1	1	0	0	3	0	0	0	0	0	0	0	0	100	0	0	0	0	0	0	AFCat1
P70441 [Na(+)/H(+) exchange regulatory cofactor NHE-RF1 ...]	0	194170	551520	194170	194170	894400	621250	194170	194170	194170	1	4	194170	194170	194170	194170	194170	759970	194170	194170	194170	1	1	1	1	0	0	1	2	0	0	0	20	20	0	0	20	40	0	0	0	AFCat1
P70460 [Vasodilator-stimulated phosphoprotein ...]	0	582510	4401040	21054470	582510	2760340	582510	582510	582510	582510	4	4	582510	4055040	48687000	582510	4060570	582510	582510	582510	582510	4	7	0	2	6	0	3	0	0	0	0	0	18.18181818	54.54545455	0	27.27272727	0	0	0	0	AFCat1
P80313;A0A0N4SV00 [T-complex protein 1 subunit eta ...]	0	388340	388340	4470070	388340	1287270	2546270	388340	388340	388340	2	3	582510	582510	13416570	582510	1627540	2536240	582510	582510	582510	3	4	0	0	3	0	2	2	0	0	0	0	0	42.85714286	0	28.57142857	28.57142857	0	0	0	AFCat1
P80314;A0A1W2P7B7;A0A1W2P828;A0A1W2P871;A0A1W2P6Q3 [T-complex protein 1 subunit beta ...]	0	582510	582510	12094900	582510	582510	7417800	582510	4017570	582510	5	9	582510	582510	582510	582510	1253440	3294870	582510	1665840	582510	3	4	3	0	4	0	1	5	0	3	0	18.75	0	25	0	6.25	31.25	0	18.75	0	AFCat1
P80316;E0CZA1 [T-complex protein 1 subunit epsilon ...]	0	582510	582510	3783340	582510	582510	4901470	582510	2383140	582510	3	4	194170	2009500	4968500	194170	1379100	3664600	194170	1700900	365260	1	6	2	1	2	0	1	3	0	2	1	16.66666667	8.333333333	16.66666667	0	8.333333333	25	0	16.66666667	8.333333333	AFCat1
P80318;E9Q133;Q3U0I3;F6Q609 [T-complex protein 1 subunit gamma ...]	0	582510	582510	27908870	582510	967210	6090170	582510	2563840	582510	4	6	582510	582510	25803470	582510	582510	5273520	582510	2566240	582510	3	5	2	0	4	0	1	4	0	2	0	15.38461538	0	30.76923077	0	7.692307692	30.76923077	0	15.38461538	0	AFCat1
P84078;P61205;Q8BSL7;D3YV25;E9Q2C2;A2A6T9 [ADP-ribosylation factor 1;ADP-ribosylation factor ...]	0	582510	1946240	63374900	582510	3718940	1487440	582510	582510	582510	3	6	388340	11551170	57637000	388340	3076670	1179740	388340	388340	388340	2	5	0	2	5	0	2	2	0	0	0	0	18.18181818	45.45454545	0	18.18181818	18.18181818	0	0	0	AFCat1
P84084 [ADP-ribosylation factor 5 ...]	0	582510	1946240	62843700	582510	3718940	2943470	582510	582510	582510	3	7	582510	11745340	60843400	582510	3270840	2775140	582510	582510	582510	3	7	0	2	6	0	2	4	0	0	0	0	14.28571429	42.85714286	0	14.28571429	28.57142857	0	0	0	AFCat1
P84096 [Rho-related GTP-binding protein RhoG ...]	0	1204890	11439570	26108270	2375940	5542440	2366140	582510	582510	582510	3	8	582510	8744640	48908400	2401740	5209640	2388040	582510	942460	582510	3	8	2	3	5	2	2	2	0	1	0	11.76470588	17.64705882	29.41176471	11.76470588	11.76470588	11.76470588	0	5.882352941	0	AFCat1
P84104 [Serine/arginine-rich splicing factor 3 ...]	0	194170	1918900	14098000	194170	194170	194170	194170	194170	194170	1	2	194170	2164900	12775000	194170	194170	194170	194170	194170	194170	1	2	0	2	2	0	0	0	0	0	0	0	50	50	0	0	0	0	0	0	AFCat1
P97315 [Cysteine and glycine-rich protein 1 ...]	0	3420270	388340	388340	1241670	388340	388340	388340	388340	388340	2	2	3487500	5085700	194170	194170	194170	194170	194170	194170	194170	1	2	2	1	0	1	0	0	0	0	0	50	25	0	25	0	0	0	0	0	AFCat1
P97351 [40S ribosomal protein S3a ...]	0	582510	582510	18219570	582510	4292770	5123970	582510	1852540	582510	3	7	582510	582510	16178170	582510	2905540	6953570	582510	1801840	582510	3	6	2	0	4	0	3	4	0	2	0	13.33333333	0	26.66666667	0	20	26.66666667	0	13.33333333	0	AFCat1
P97369;A8XU21 [Neutrophil cytosol factor 4 ...]	0	582510	4691070	20960700	582510	582510	582510	582510	582510	582510	4	6	582510	6082200	23061600	582510	2189740	582510	582510	582510	582510	4	8	0	5	8	0	1	0	0	0	0	0	35.71428571	57.14285714	0	7.142857143	0	0	0	0	AFCat1
P97384;D3Z7U0 [Annexin A11;Annexin ...]	0	582510	1451340	52859000	582510	582510	1168970	582510	582510	582510	4	6	582510	1784440	56731100	582510	582510	582510	582510	994440	582510	5	7	1	2	9	0	0	1	0	1	0	7.142857143	14.28571429	64.28571429	0	0	7.142857143	0	7.142857143	0	AFCat1
P97425 [Eosinophil cationic protein 2 ...]	0	388340	3481070	4904170	388340	388340	388340	388340	388340	388340	2	2	388340	4500210	9675870	388340	388340	388340	388340	388340	388340	2	3	0	3	2	0	0	0	0	0	0	0	60	40	0	0	0	0	0	0	AFCat1
P97426;O35290 [Eosinophil cationic protein 1;Eosinophil cationic- ...]	0	194170	1913900	7362700	194170	194170	194170	194170	194170	194170	1	2	194170	2383300	194170	194170	194170	194170	194170	194170	194170	1	1	0	2	1	0	0	0	0	0	0	0	66.66666667	33.33333333	0	0	0	0	0	0	AFCat1
P97429;F7ANV6;D3Z0S1;A0A0N4SW89;A0A0N4SV57;S4R1F2 [Annexin A4;Annexin ...]	0	582510	582510	15971670	582510	1425450	8578300	582510	4029970	582510	5	9	582510	582510	9861140	582510	582510	5662970	582510	1921740	582510	3	4	3	0	3	0	2	5	0	3	0	18.75	0	18.75	0	12.5	31.25	0	18.75	0	AFCat1
P97797 [Tyrosine-protein phosphatase non-receptor type sub ...]	0	194170	194170	4178300	194170	194170	194170	194170	194170	194170	1	1	194170	194170	4341900	194170	194170	194170	194170	194170	194170	1	1	0	0	2	0	0	0	0	0	0	0	0	100	0	0	0	0	0	0	AFCat1
P97872;Q14DT3;Q8C116 [Dimethylaniline monooxygenase [N-oxide-forming] 5 ...]	0	10344370	19679200	8961340	3781840	13828670	38874900	2539240	52802900	582510	11	27	18905700	16554900	11606470	10543000	10750800	33573600	3085240	40599300	1601340	12	35	23	11	3	4	5	11	4	17	1	29.11392405	13.92405063	3.797468354	5.063291139	6.329113924	13.92405063	5.063291139	21.51898734	1.265822785	AFCat1
P99024;Q9CWF2;Q7TMM9;P68372;Q9D6F9;Q922F4;Q9ERD7;CON__ENSEMBL:ENSBTAP00000025008;A2AQ07;G3UZR1;A0A1D5RM76 [Tubulin beta-5 chain;Tubulin beta-2B chain;Tubulin ...]	0	6748770	36880100	249542000	4249720	20473900	17565300	582510	12730800	582510	8	28	3466640	37437700	235996000	6333750	20674100	17915900	582510	9808950	582510	11	30	10	9	18	6	8	7	0	7	0	15.38461538	13.84615385	27.69230769	9.230769231	12.30769231	10.76923077	0	10.76923077	0	AFCat1
P99026 [Proteasome subunit beta type-4 ...]	0	194170	194170	5049900	194170	1575200	1976600	194170	194170	194170	1	3	388340	388340	12600500	388340	388340	388340	388340	388340	388340	2	2	0	0	3	0	1	1	0	0	0	0	0	60	0	20	20	0	0	0	AFCat1
Q00612;A3KG36;Q836V0;G3UWD6;REV__P46662;P97324 [Glucose-6-phosphate 1-dehydrogenase X;Glucose-6-ph ...]	0	582510	13216500	97409000	582510	3231840	14090700	582510	1506740	582510	11	17	582510	14760500	93080000	2095440	3464140	11743270	582510	1687640	582510	10	19	2	9	16	1	2	6	0	2	0	5.263157895	23.68421053	42.10526316	2.631578947	5.263157895	15.78947368	0	5.263157895	0	AFCat1
Q00623;A0A1L1STX7;CON__P15497 [Apolipoprotein A-I;Proapolipoprotein A-I;Truncated ...]	0	477779000	618770000	457490000	424179000	99891000	70200000	126058000	23258800	23037200	21	94	490518000	530720000	416820000	396577000	111546000	50254000	132747000	15572000	26687700	18	89	43	33	26	26	15	15	15	10	10	22.27979275	17.0984456	13.47150259	13.47150259	7.772020725	7.772020725	7.772020725	5.18134715	5.18134715	AFCat1
Q00897 [Alpha-1-antitrypsin 1-4 ...]	0	618612000	800410000	1187780000	399016000	167969800	142544000	130637000	35614600	81240170	8	44	653412000	850740000	824700000	388925000	161924700	144896700	145560000	36662200	86052420	8	44	22	14	12	10	7	9	9	9	5	22.68041237	14.43298969	12.37113402	10.30927835	7.216494845	9.278350515	9.278350515	9.278350515	5.154639175	AFCat1
Q00898 [Alpha-1-antitrypsin 1-5 ...]	0	238488000	467067000	871080000	124555870	115570970	51939170	44965170	10582770	10538340	6	25	214390000	469911000	463154000	168749170	116268340	41634570	59120500	10887370	10231940	6	22	13	8	8	4	3	4	5	4	2	25.49019608	15.68627451	15.68627451	7.843137255	5.882352941	7.843137255	9.803921569	7.843137255	3.921568627	AFCat1
Q01339;I7HJR3;CON__P17690 [Beta-2-glycoprotein 1 ...]	0	15358670	32666000	16536170	5571340	1614040	1769440	582510	582510	582510	6	12	19292000	26024800	27607800	6791270	582510	582510	582510	582510	582510	7	13	5	10	5	3	1	1	0	0	0	20	40	20	12	4	4	0	0	0	AFCat1
Q01853 [Transitional endoplasmic reticulum ATPase ...]	0	582510	7855500	35388800	2959570	6623670	10587800	582510	6862200	582510	8	20	582510	4353270	30964700	1247590	7676970	10255100	582510	2925540	582510	7	15	4	5	11	3	4	8	0	4	0	10.25641026	12.82051282	28.20512821	7.692307692	10.25641026	20.51282051	0	10.25641026	0	AFCat1
Q02053;P31254 [Ubiquitin-like modifier-activating enzyme 1 ...]	0	582510	2026540	31589000	582510	582510	1501840	582510	1440840	582510	5	7	582510	1883940	28066100	582510	1210240	1522340	582510	1207660	582510	4	7	2	2	7	0	1	2	0	2	0	12.5	12.5	43.75	0	6.25	12.5	0	12.5	0	AFCat1
Q02257 [Junction plakoglobin ...]	0	1160300	194170	194170	194170	194170	194170	194170	194170	194170	1	1	388340	388340	388340	388340	3138070	388340	388340	388340	2589270	2	2	1	0	0	0	1	0	0	0	1	33.33333333	0	0	0	33.33333333	0	0	0	33.33333333	AFCat1
Q03734;P29621 [Serine protease inhibitor A3M ...]	0	95855600	214804000	430928000	42064990	12977270	16171340	582510	5176770	582510	6	20	100458400	200478000	445911000	40985340	11519340	10247840	14346340	3541840	582510	5	16	9	11	7	3	3	2	1	3	0	23.07692308	28.20512821	17.94871795	7.692307692	7.692307692	5.128205128	2.564102564	7.692307692	0	AFCat1
Q05144;A0A2R8VHH0 [Ras-related C3 botulinum toxin substrate 2 ...]	0	1204890	39383300	181662000	6727670	15125570	3219970	582510	582510	582510	4	15	2641540	49561000	242788000	6641170	13484170	3370070	582510	942460	582510	6	18	3	9	9	4	4	4	0	1	0	8.823529412	26.47058824	26.47058824	11.76470588	11.76470588	11.76470588	0	2.941176471	0	AFCat1
Q05816 [Fatty acid-binding protein, epidermal ...]	0	388340	388340	388340	388340	388340	6751070	388340	1761970	388340	2	2	388340	388340	2993570	388340	388340	14296000	388340	1883670	388340	2	4	2	0	1	0	0	3	0	2	0	25	0	12.5	0	0	37.5	0	25	0	AFCat1
Q06770 [Corticosteroid-binding globulin ...]	0	1773270	8644200	26514000	388340	388340	388340	388340	388340	388340	2	5	582510	2646540	33571700	582510	582510	582510	582510	582510	582510	3	4	1	3	5	0	0	0	0	0	0	11.11111111	33.33333333	55.55555556	0	0	0	0	0	0	AFCat1
Q06890;E9PUU2;E9PXG5;E9Q8Y5;E9Q9B8;E9Q2G2 [Clusterin;Clusterin beta chain;Clusterin alpha cha ...]	0	37840400	53608200	50753300	20883300	24631970	14845700	8667810	1543140	4155040	7	30	29088400	54952900	23703100	21338100	26909970	14703500	9797500	582510	4512890	6	30	11	12	8	7	4	8	7	1	3	18.03278689	19.67213115	13.1147541	11.47540984	6.557377049	13.1147541	11.47540984	1.639344262	4.918032787	AFCat1
Q07456 [Protein AMBP;Alpha-1-microglobulin;Inter-alpha-try ...]	0	3883970	20293500	24009340	2182940	582510	582510	582510	582510	582510	4	8	4189870	17412800	20960340	2582240	582510	582510	582510	582510	582510	4	8	4	8	2	2	0	0	0	0	0	25	50	12.5	12.5	0	0	0	0	0	AFCat1
Q08093;D3Z7R6;A0A0G2JDV8;Q9DAW9 [Calponin-2 ...]	0	582510	5724770	582510	582510	2943070	582510	582510	582510	582510	3	4	582510	2902140	10683340	582510	1647740	582510	582510	582510	582510	3	3	0	3	1	0	3	0	0	0	0	0	42.85714286	14.28571429	0	42.85714286	0	0	0	0	AFCat1
Q19LI2 [Alpha-1B-glycoprotein ...]	0	5764900	582510	582510	4252100	582510	582510	582510	582510	582510	5	7	3592770	582510	3935940	4492600	582510	582510	582510	582510	582510	5	6	6	0	1	6	0	0	0	0	0	46.15384615	0	7.692307692	46.15384615	0	0	0	0	0	AFCat1
Q3KQQ2;P04939;Q80YX8;P11590 [Major urinary protein 3 ...]	0	22845770	225997000	582510	4472840	7712540	40139600	5681840	582510	3375140	5	14	38168100	202435000	582510	21513170	8000540	38730200	19583670	582510	3983040	5	18	6	10	0	3	2	6	3	0	2	18.75	31.25	0	9.375	6.25	18.75	9.375	0	6.25	AFCat1
Q3SXK0;P38575 [Uroplakin-2 ...]	0	5138570	3549740	582510	3152670	582510	2312340	582510	10045770	582510	3	8	4628070	2283840	582510	1723440	2832970	10936000	582510	13362770	582510	3	11	8	2	0	3	2	4	0	4	0	34.7826087	8.695652174	0	13.04347826	8.695652174	17.39130435	0	17.39130435	0	AFCat1
Q3THE2;Q6ZWQ9;Q9CQ19 [Myosin regulatory light chain 12B;Myosin regulator ...]	0	1233470	6522170	53692000	2563970	3171470	5592170	388340	652280	388340	2	8	388340	7338170	20794300	2117870	3098970	4989870	388340	641010	388340	2	7	3	2	4	2	2	2	0	2	0	17.64705882	11.76470588	23.52941176	11.76470588	11.76470588	11.76470588	0	11.76470588	0	AFCat1
Q3THW5;P0C0S6;Q8R029;Q3UA95 [Histone H2A.V;Histone H2A.Z;Histone H2A ...]	0	582510	717313000	2180969000	79569370	165848470	117853970	582510	66889340	25974340	5	16	26240340	710958000	2.10E+09	82954600	139199270	115594570	14705340	44261340	25629340	5	20	3	7	10	5	4	4	1	2	2	7.894736842	18.42105263	26.31578947	13.15789474	10.52631579	10.52631579	2.631578947	5.263157895	5.263157895	AFCat1
Q3TLP8;P63001;P60764;A2AC13;A0A2R8VH29;A0A1B0GSL4;G3UZM2;D3Z3L1;F2Z463;D3YX61;Q8R527;Q9ER71 [Ras-related C3 botulinum toxin substrate 1;Ras-rel ...]	0	1204890	12535770	32729500	2375940	6339450	2366140	582510	582510	582510	3	10	2641540	31787200	99016300	2401740	5858070	2388040	582510	942460	582510	5	13	3	5	7	2	4	2	0	1	0	12.5	20.83333333	29.16666667	8.333333333	16.66666667	8.333333333	0	4.166666667	0	AFCat1
Q3TML0;Q922R8 [Protein disulfide-isomerase A6 ...]	0	194170	194170	3897400	194170	194170	194170	194170	194170	194170	1	1	388340	388340	7466600	388340	388340	388340	388340	388340	388340	2	2	0	0	3	0	0	0	0	0	0	0	0	100	0	0	0	0	0	0	AFCat1
Q3TN85;Q8CAP3;P54726;P54728 [UV excision repair protein RAD23 homolog A;UV exci ...]	0	388340	388340	388340	388340	1167740	2898400	388340	388340	388340	2	3	194170	194170	194170	194170	758760	194170	194170	194170	194170	1	1	0	0	0	0	2	2	0	0	0	0	0	0	0	50	50	0	0	0	AFCat1
Q3TYL7;Q9QYJ3 [DnaJ homolog subfamily B member 1 ...]	0	194170	194170	194170	194170	194170	391670	194170	194170	194170	1	1	194170	194170	194170	194170	194170	416630	194170	194170	194170	1	1	0	0	0	0	0	2	0	0	0	0	0	0	0	0	100	0	0	0	AFCat1
Q3U2S8 [Voltage-gated hydrogen channel 1 ...]	0	194170	194170	9105500	194170	194170	194170	194170	194170	194170	1	1	194170	194170	7909500	194170	194170	194170	194170	194170	194170	1	1	0	0	2	0	0	0	0	0	0	0	0	100	0	0	0	0	0	0	AFCat1
Q3U367;Q9JLJ2 [4-trimethylaminobutyraldehyde dehydrogenase ...]	0	388340	388340	388340	388340	388340	3013990	388340	388340	388340	2	2	582510	582510	1849940	582510	582510	2320480	582510	582510	582510	3	3	0	0	1	0	0	4	0	0	0	0	0	20	0	0	80	0	0	0	AFCat1
Q3U3V1;O88947 [Coagulation factor X;Factor X light chain;Factor X ...]	0	4337770	7923500	388340	1791170	388340	388340	388340	388340	388340	2	4	388340	6385000	388340	2250950	388340	388340	388340	388340	388340	2	4	1	4	0	3	0	0	0	0	0	12.5	50	0	37.5	0	0	0	0	0	AFCat1
Q3U5Q7 [UMP-CMP kinase 2, mitochondrial ...]	0	194170	194170	4473700	194170	194170	194170	194170	194170	194170	1	1	388340	388340	7893100	388340	388340	388340	388340	388340	388340	2	2	0	0	3	0	0	0	0	0	0	0	0	100	0	0	0	0	0	0	AFCat1
Q3U9G9;A0A0A6YWS3;A0A0A6YXW3;A0A0A6YXT6;A0A0A6YW01;A0A0A6YY12 [Lamin-B receptor ...]	0	582510	4525640	34566200	582510	4611670	582510	582510	582510	582510	4	7	582510	5376370	35458800	582510	582510	582510	582510	582510	582510	4	6	0	3	8	0	2	0	0	0	0	0	23.07692308	61.53846154	0	15.38461538	0	0	0	0	AFCat1
Q3UA72;Q9CPW4 [Actin-related protein 2/3 complex subunit 5 ...]	0	194170	11877000	76446000	1738600	4361800	3900200	194170	1150300	194170	1	6	1303300	6877200	81598000	1699800	4195500	2115500	194170	1039500	194170	1	7	3	2	2	2	2	2	0	2	0	20	13.33333333	13.33333333	13.33333333	13.33333333	13.33333333	0	13.33333333	0	AFCat1
Q3UDR8 [Protein YIPF3;Protein YIPF3, N-terminally processe ...]	0	572860	3162700	194170	743560	2270500	1524000	194170	194170	1352300	1	6	674210	2934700	194170	780640	2333600	194170	1190600	194170	1395100	1	6	2	2	0	2	2	1	1	0	2	16.66666667	16.66666667	0	16.66666667	16.66666667	8.333333333	8.333333333	0	16.66666667	AFCat1
Q3UDS7;A0A1L1SSF2;Q8VDL4 [ADP-dependent glucokinase ...]	0	582510	10187670	57115000	582510	4526270	582510	582510	582510	582510	6	9	582510	8025900	57214000	582510	2011040	582510	582510	582510	582510	7	10	0	5	11	0	3	0	0	0	0	0	26.31578947	57.89473684	0	15.78947368	0	0	0	0	AFCat1
Q3UER8;Q8VCM7 [Fibrinogen gamma chain ...]	0	69525000	267502000	226664000	15361600	45036000	9416270	7088840	582510	582510	14	38	75197000	284006000	223367000	12533870	47703000	7346840	2825240	582510	582510	14	33	16	25	10	5	10	3	2	0	0	22.53521127	35.21126761	14.08450704	7.042253521	14.08450704	4.225352113	2.816901408	0	0	AFCat1
Q3UP87 [Neutrophil elastase ...]	0	582510	92528000	75433000	3166600	15107470	3660070	582510	582510	582510	7	16	582510	70770000	189702000	582510	16439530	3875070	582510	582510	582510	7	14	0	10	9	2	5	4	0	0	0	0	33.33333333	30	6.666666667	16.66666667	13.33333333	0	0	0	AFCat1
Q3UV17;CON__Q7RTS7;CON__Q32MB2 [Keratin, type II cytoskeletal 2 oral ...]	0	183471000	274691600	89973170	161011000	341112900	188182800	145428340	37964070	152518340	5	24	205081500	306512000	142105000	115079070	351445400	202406900	166084000	37426970	162565170	6	27	11	9	6	6	6	6	4	4	3	20	16.36363636	10.90909091	10.90909091	10.90909091	10.90909091	7.272727273	7.272727273	5.454545455	AFCat1
Q3UVK0;G8JL46;F6TQS9 [Endoplasmic reticulum metallopeptidase 1 ...]	0	194170	194170	194170	194170	194170	194170	194170	506200	194170	1	1	388340	388340	3255370	388340	388340	388340	388340	635720	388340	2	2	2	0	1	0	0	0	0	2	0	40	0	20	0	0	0	0	40	0	AFCat1
Q3V3R8;A0A0J9YUI1;A0A0J9YU07;P61087 [Ubiquitin-conjugating enzyme E2 K ...]	0	194170	194170	194170	194170	194170	1499700	194170	194170	194170	1	1	194170	194170	194170	194170	194170	910920	194170	194170	194170	1	1	0	0	0	0	0	2	0	0	0	0	0	0	0	0	100	0	0	0	AFCat1
Q4U4S6 [Xin actin-binding repeat-containing protein 2 ...]	0	194170	194170	194170	194170	194170	194170	194170	194170	435270	1	1	194170	194170	18747000	194170	194170	194170	194170	194170	194170	1	1	0	0	1	0	0	0	0	0	1	0	0	50	0	0	0	0	0	50	AFCat1
Q504P4;P63017;D3Z5E2 [Heat shock cognate 71 kDa protein ...]	0	8697870	26213400	177146000	12724650	11496570	45836500	1573840	24524300	2311140	15	37	8555770	30084700	221450000	4653650	12620670	28738500	582510	23110400	582510	14	34	13	14	23	4	4	11	1	8	1	16.4556962	17.72151899	29.11392405	5.063291139	5.063291139	13.92405063	1.265822785	10.12658228	1.265822785	AFCat1
Q542I8;P11835;M0QWA7;D3YYP8;D3Z1S4 [Integrin beta;Integrin beta-2 ...]	0	582510	28277200	107943000	855300	10842000	582510	582510	582510	582510	9	19	582510	17860000	105029000	893680	8873900	582510	582510	582510	582510	9	16	0	11	13	2	9	0	0	0	0	0	31.42857143	37.14285714	5.714285714	25.71428571	0	0	0	0	AFCat1
Q543K9;P23492;A0A2I3BQH2;A0A2I3BS22;Q9D8C9 [Purine nucleoside phosphorylase ...]	0	582510	3603340	78123000	582510	7560540	3154840	582510	582510	582510	5	7	582510	6582970	80567000	582510	9107540	582510	582510	582510	582510	5	7	0	3	8	0	2	1	0	0	0	0	21.42857143	57.14285714	0	14.28571429	7.142857143	0	0	0	AFCat1
Q5EBP8;P49312 [Heterogeneous nuclear ribonucleoprotein A1;Heterog ...]	0	194170	194170	7329500	194170	194170	194170	194170	194170	194170	1	1	194170	194170	5952500	194170	194170	194170	194170	194170	194170	1	1	0	0	2	0	0	0	0	0	0	0	0	100	0	0	0	0	0	0	AFCat1
Q5FW60 [Major urinary protein 20 ...]	0	97216400	184835000	582510	109898340	228438340	121298170	87650340	582510	582510	5	14	94315300	479384000	582510	109358340	229181270	116984370	87344070	582510	582510	5	16	8	10	0	2	3	4	3	0	0	26.66666667	33.33333333	0	6.666666667	10	13.33333333	10	0	0	AFCat1
Q5ND35;Q61247;E9PXE0 [Alpha-2-antiplasmin ...]	0	4345440	33430200	32337340	582510	582510	582510	582510	582510	582510	5	6	10008600	28696170	33035770	582510	582510	582510	582510	582510	582510	3	7	4	6	3	0	0	0	0	0	0	30.76923077	46.15384615	23.07692308	0	0	0	0	0	0	AFCat1
Q5RKN9;P47753;A0A0G2JE27 [F-actin-capping protein subunit alpha-1 ...]	0	582510	1092700	32632100	582510	582510	582510	582510	582510	582510	3	4	582510	1110470	34611000	582510	582510	582510	582510	582510	582510	3	4	0	2	6	0	0	0	0	0	0	0	25	75	0	0	0	0	0	0	AFCat1
Q5SQG5;P67778 [Prohibitin ...]	0	194170	194170	194170	194170	194170	194170	194170	695050	194170	1	1	388340	388340	1319270	388340	388340	961840	388340	388340	388340	2	2	1	0	1	0	0	1	0	1	0	25	0	25	0	0	25	0	25	0	AFCat1
Q5SUA5 [Unconventional myosin-Ig ...]	0	194170	194170	4100600	194170	194170	194170	194170	194170	194170	1	1	194170	194170	6518300	194170	194170	194170	194170	194170	194170	1	1	0	0	2	0	0	0	0	0	0	0	0	100	0	0	0	0	0	0	AFCat1
Q5SVG5;Q5SVG4;O35643;H3BKM0;H3BIY9;Q9DBG3 [AP-1 complex subunit beta-1;AP complex subunit bet ...]	0	582510	582510	14759400	582510	582510	582510	582510	582510	582510	3	3	388340	388340	9306200	388340	388340	388340	388340	388340	388340	2	2	0	0	5	0	0	0	0	0	0	0	0	100	0	0	0	0	0	0	AFCat1
Q5SW88;P62821;Q5SW87;A0A494BA38;A0A494BBL7;A0A494B945;Q9D1G1;Q5SW86 [Ras-related protein Rab-1A;Ras-related protein Rab ...]	0	2518440	11354340	80149000	2492640	5315470	6805270	582510	6531470	582510	5	13	2364240	11290340	67361300	2527140	7114700	582510	582510	582510	582510	4	9	4	2	7	2	5	2	0	2	0	16.66666667	8.333333333	29.16666667	8.333333333	20.83333333	8.333333333	0	8.333333333	0	AFCat1
Q5SXR6;Q68FD5;F6Z1R4 [Clathrin heavy chain;Clathrin heavy chain 1 ...]	0	582510	5254900	26921000	582510	582510	1925640	582510	2142850	582510	12	13	582510	2934740	28124300	582510	582510	1961340	582510	582510	582510	11	11	2	4	16	0	0	2	0	2	0	7.692307692	15.38461538	61.53846154	0	0	7.692307692	0	7.692307692	0	AFCat1
Q5XJY5 [Coatomer subunit delta ...]	0	194170	194170	194170	194170	194170	790370	194170	194170	194170	1	1	388340	388340	2134770	388340	388340	1213670	388340	388340	388340	2	2	0	0	1	0	0	2	0	0	0	0	0	33.33333333	0	0	66.66666667	0	0	0	AFCat1
Q60590 [Alpha-1-acid glycoprotein 1 ...]	0	2166640	4145240	83862000	582510	582510	582510	582510	582510	582510	3	5	5906670	14016470	27943170	582510	582510	582510	582510	582510	582510	3	6	3	3	5	0	0	0	0	0	0	27.27272727	27.27272727	45.45454545	0	0	0	0	0	0	AFCat1
Q60692 [Proteasome subunit beta type-6 ...]	0	582510	582510	10167970	582510	1776940	3456440	582510	582510	582510	3	4	388340	388340	10909900	388340	1398270	388340	388340	2934870	388340	2	4	1	0	4	0	2	1	0	1	0	11.11111111	0	44.44444444	0	22.22222222	11.11111111	0	11.11111111	0	AFCat1
Q60817;P70670 [Nascent polypeptide-associated complex subunit alp ...]	0	388340	388340	7553470	388340	388340	1306470	388340	388340	388340	2	2	388340	388340	10172670	388340	388340	1401270	388340	388340	388340	2	2	0	0	2	0	0	2	0	0	0	0	0	50	0	0	50	0	0	0	AFCat1
Q60864 [Stress-induced-phosphoprotein 1 ...]	0	582510	582510	10147300	582510	582510	582510	582510	582510	582510	3	3	582510	582510	7315570	582510	582510	999370	582510	582510	582510	3	3	0	0	5	0	0	1	0	0	0	0	0	83.33333333	0	0	16.66666667	0	0	0	AFCat1
Q60932 [Voltage-dependent anion-selective channel protein ...]	0	194170	2835800	5870400	194170	194170	194170	194170	194170	194170	1	2	194170	3098600	7615100	194170	194170	194170	194170	194170	194170	1	2	0	2	2	0	0	0	0	0	0	0	50	50	0	0	0	0	0	0	AFCat1
Q61029;Q61033 [Lamina-associated polypeptide 2, isoforms beta/del ...]	0	582510	582510	17615800	582510	582510	582510	582510	582510	582510	3	3	388340	388340	14846600	388340	388340	388340	388340	388340	388340	2	2	0	0	5	0	0	0	0	0	0	0	0	100	0	0	0	0	0	0	AFCat1
Q61093;E9Q7S3;E9Q802 [Cytochrome b-245 heavy chain ...]	0	582510	4788840	57809000	582510	582510	582510	582510	582510	582510	4	5	582510	5210140	56923000	582510	1206320	582510	582510	582510	582510	4	6	0	2	8	0	1	0	0	0	0	0	18.18181818	72.72727273	0	9.090909091	0	0	0	0	AFCat1
Q61129;A0A0G2JF07 [Complement factor I;Complement factor I heavy chai ...]	0	2981340	12417000	10730340	2408040	582510	582510	582510	582510	582510	6	7	2394840	12596900	16956170	2415440	582510	582510	582510	582510	582510	7	9	2	9	3	2	0	0	0	0	0	12.5	56.25	18.75	12.5	0	0	0	0	0	AFCat1
Q61171;D3Z4A4 [Peroxiredoxin-2 ...]	0	1945140	4989540	7325440	2849840	33196170	31773100	4175440	2788940	582510	4	11	582510	8459670	27207270	3192840	37828300	5744340	6290570	3879870	582510	5	13	4	3	3	2	5	4	3	3	0	14.81481481	11.11111111	11.11111111	7.407407407	18.51851852	14.81481481	11.11111111	11.11111111	0	AFCat1
Q61176 [Arginase-1 ...]	0	582510	582510	139901000	582510	582510	582510	582510	582510	582510	4	4	582510	582510	145815000	582510	582510	582510	582510	582510	582510	4	4	0	0	8	0	0	0	0	0	0	0	0	100	0	0	0	0	0	0	AFCat1
Q61233;A0A1C7CYV0;B1AX58;Q99K51;D3YZ25;D3YVW8;D3Z7D9;D3Z311;Q3V0K9 [Plastin-2 ...]	0	582510	41774000	219322000	4266370	25358100	2480540	582510	582510	582510	18	34	582510	40678000	214901000	2721640	15520800	2410340	582510	582510	1067650	18	35	0	22	33	3	8	2	0	0	1	0	31.88405797	47.82608696	4.347826087	11.5942029	2.898550725	0	0	1.449275362	AFCat1
Q61335 [B-cell receptor-associated protein 31 ...]	0	484170	194170	194170	194170	1073600	2339100	194170	194170	194170	1	3	194170	194170	2173700	194170	1221400	194170	194170	194170	194170	1	2	1	0	1	0	2	1	0	0	0	20	0	20	0	40	20	0	0	0	AFCat1
Q61362;D3Z2Z5;D3YXU4 [Chitinase-3-like protein 1 ...]	0	582510	582510	7188670	582510	1149620	582510	582510	582510	582510	3	3	388340	388340	8102100	388340	388340	388340	388340	388340	388340	2	2	0	0	4	0	1	0	0	0	0	0	0	80	0	20	0	0	0	0	AFCat1
Q61598;A0A1Y7VL99;A0A1Y7VLG4 [Rab GDP dissociation inhibitor beta ...]	0	582510	9111700	45446000	828810	582510	6043100	582510	1764740	582510	10	18	582510	7049600	41194000	582510	3166840	4884270	582510	582510	582510	6	12	1	7	14	1	1	6	0	1	0	3.225806452	22.58064516	45.16129032	3.225806452	3.225806452	19.35483871	0	3.225806452	0	AFCat1
Q61599;D3YWL7;A0A0N4SVH4 [Rho GDP-dissociation inhibitor 2 ...]	0	388340	25336200	68142000	388340	7868370	5913070	388340	388340	388340	2	6	582510	28139770	73643900	582510	6955540	7015640	582510	582510	582510	5	9	0	4	7	0	2	2	0	0	0	0	26.66666667	46.66666667	0	13.33333333	13.33333333	0	0	0	AFCat1
Q61646 [Haptoglobin;Haptoglobin alpha chain;Haptoglobin be ...]	0	12060880	52864000	152313000	18972370	80261000	11720870	13748700	582510	582510	9	27	14078600	69994000	165875000	14274700	79313000	5675640	12669800	582510	2850240	9	33	6	15	11	7	11	3	6	0	1	10	25	18.33333333	11.66666667	18.33333333	5	10	0	1.666666667	AFCat1
Q61696;P17879 [Heat shock 70 kDa protein 1A;Heat shock 70 kDa pro ...]	0	582510	582510	582510	12058340	582510	4611970	582510	3372670	582510	3	5	582510	582510	582510	582510	582510	4574800	582510	3790670	582510	3	5	4	0	0	1	0	5	0	4	0	28.57142857	0	0	7.142857143	0	35.71428571	0	28.57142857	0	AFCat1
Q61792;A2A6G9;A2A6H0;A2A6G7;A2A6G8;A2A6G0;A2A6G6 [LIM and SH3 domain protein 1 ...]	0	582510	4512740	19185070	582510	582510	10284540	582510	7142240	582510	3	5	582510	7511770	12618470	582510	582510	3077940	582510	582510	582510	3	5	1	3	4	0	0	2	0	1	0	9.090909091	27.27272727	36.36363636	0	0	18.18181818	0	9.090909091	0	AFCat1
Q61838;D3YUI3;Q6GQT1 [Alpha-2-macroglobulin;Alpha-2-macroglobulin 165 kD ...]	0	35736000	73579000	460720000	43078000	22130600	8486900	12072300	582510	582510	25	68	32231000	96043000	378670000	42920000	20675400	4880770	12411300	582510	3874870	26	73	24	31	40	16	8	8	11	0	3	17.0212766	21.9858156	28.36879433	11.34751773	5.673758865	5.673758865	7.80141844	0	2.127659574	AFCat1
Q61878 [Bone marrow proteoglycan;Eosinophil granule major ...]	0	388340	14675170	25144170	388340	388340	388340	388340	388340	388340	2	2	388340	14460170	53843000	388340	388340	388340	388340	388340	388340	2	3	0	2	3	0	0	0	0	0	0	0	40	60	0	0	0	0	0	0	AFCat1
Q62093 [Serine/arginine-rich splicing factor 2 ...]	0	388340	2676600	15354300	388340	388340	1113690	388340	1161580	388340	2	6	388340	1704370	14511900	388340	388340	1108310	388340	1106980	388340	2	5	2	3	4	0	0	2	0	2	0	15.38461538	23.07692308	30.76923077	0	0	15.38461538	0	15.38461538	0	AFCat1
Q62266;Q62267 [Cornifin-A ...]	0	74887000	33459200	9332940	155696900	274073900	1181470000	46973170	188942000	12085340	8	33	51935500	87625000	24587340	32544300	233089000	866890000	9780340	334059000	5843540	8	34	16	10	2	7	12	15	3	8	2	21.33333333	13.33333333	2.666666667	9.333333333	16	20	4	10.66666667	2.666666667	AFCat1
Q62465 [Synaptic vesicle membrane protein VAT-1 homolog ...]	0	388340	388340	388340	388340	388340	2137900	388340	735050	388340	2	3	388340	388340	2619370	388340	388340	1291670	388340	388340	388340	2	2	1	0	1	0	0	3	0	1	0	16.66666667	0	16.66666667	0	0	50	0	16.66666667	0	AFCat1
Q64339 [Ubiquitin-like protein ISG15 ...]	0	194170	194170	194170	194170	1445400	194170	194170	194170	194170	1	1	194170	194170	194170	194170	1332900	194170	194170	194170	194170	1	1	0	0	0	0	2	0	0	0	0	0	0	0	0	100	0	0	0	0	AFCat1
Q64726 [Zinc-alpha-2-glycoprotein ...]	0	388340	4723370	7239370	388340	388340	388340	388340	388340	388340	2	2	194170	194170	5205200	194170	194170	194170	194170	194170	194170	1	1	0	1	2	0	0	0	0	0	0	0	33.33333333	66.66666667	0	0	0	0	0	0	AFCat1
Q64727 [Vinculin ...]	0	582510	6554400	17452100	582510	4315800	1380570	582510	582510	582510	8	12	582510	6215900	20406400	582510	1760740	1203530	582510	582510	582510	8	11	0	9	7	0	5	2	0	0	0	0	39.13043478	30.43478261	0	21.73913043	8.695652174	0	0	0	AFCat1
Q6A0A2 [La-related protein 4B ...]	0	194170	194170	1471600	194170	194170	194170	194170	194170	194170	1	1	194170	176040	194170	194170	194770	194170	194170	194170	194170	1	2	0	1	1	0	1	0	0	0	0	0	33.33333333	33.33333333	0	33.33333333	0	0	0	0	AFCat1
Q6BCL1 [PML-RARA-regulated adapter molecule 1 ...]	0	194170	194170	2239900	194170	194170	194170	194170	194170	194170	1	1	194170	194170	1869000	194170	194170	194170	194170	194170	194170	1	1	0	0	2	0	0	0	0	0	0	0	0	100	0	0	0	0	0	0	AFCat1
Q6GT24;D3Z0Y2;O08709;Q8BG37 [Peroxiredoxin-6 ...]	0	582510	1172500	41711400	582510	3008640	582510	582510	582510	582510	5	6	582510	582510	28126200	582510	3060740	582510	582510	582510	582510	3	4	0	1	7	0	2	0	0	0	0	0	10	70	0	20	0	0	0	0	AFCat1
Q6P069 [Sorcin ...]	0	582510	3481970	29821700	582510	3233240	2073740	582510	582510	582510	4	7	582510	5029070	26838900	582510	582510	2218940	582510	582510	582510	3	6	0	4	6	0	1	2	0	0	0	0	30.76923077	46.15384615	0	7.692307692	15.38461538	0	0	0	AFCat1
Q6S9I0;Q6S9I2;Q6S9I3;A0A338P699;A0A338P7D0;E0CYI5;CON__P01045-1;CON__Q2KJ62;CON__P01044-1 [ ...]	0	52240400	75255170	78997170	44187170	6716940	5963940	5065640	582510	582510	3	12	47305270	61498270	63628340	40411100	10246640	582510	5000340	582510	582510	4	11	6	4	3	5	2	1	2	0	0	26.08695652	17.39130435	13.04347826	21.73913043	8.695652174	4.347826087	8.695652174	0	0	AFCat1
Q6ZQ38 [Cullin-associated NEDD8-dissociated protein 1 ...]	0	388340	388340	3920570	388340	388340	1553770	388340	388340	388340	2	2	388340	388340	3299570	388340	388340	1661870	388340	1412670	388340	2	3	1	0	2	0	0	2	0	1	0	16.66666667	0	33.33333333	0	0	33.33333333	0	16.66666667	0	AFCat1
Q6ZQM8 [UDP-glucuronosyltransferase 1-7C ...]	0	582510	5606170	582510	1140380	582510	2933040	582510	11416300	582510	5	8	582510	4537670	582510	582510	582510	3971770	582510	6503570	582510	4	6	6	4	0	1	0	3	0	6	0	30	20	0	5	0	15	0	30	0	AFCat1
Q6ZWN5;F7CJS8;D3YWH9;Q9CXW7 [40S ribosomal protein S9 ...]	0	194170	194170	6972500	194170	194170	194170	194170	194170	194170	1	1	388340	388340	6402170	388340	388340	2044470	388340	388340	388340	2	2	0	0	2	0	0	1	0	0	0	0	0	66.66666667	0	0	33.33333333	0	0	0	AFCat1
Q6ZWV7 [60S ribosomal protein L35 ...]	0	194170	194170	10486000	194170	2802600	3816400	194170	194170	194170	1	3	778080	388340	388340	1224070	2752270	3679370	388340	869060	388340	2	5	2	0	1	1	2	2	0	1	0	22.22222222	0	11.11111111	11.11111111	22.22222222	22.22222222	0	11.11111111	0	AFCat1
Q6ZWZ7;Q9CPR4;B2RY53 [60S ribosomal protein L17 ...]	0	388340	388340	16791400	388340	388340	388340	388340	388340	388340	2	2	194170	194170	5688100	194170	194170	3119500	194170	194170	194170	1	2	0	0	3	0	0	1	0	0	0	0	0	75	0	0	25	0	0	0	AFCat1
Q76MZ3;G3UWL2 [Serine/threonine-protein phosphatase 2A 65 kDa reg ...]	0	582510	582510	19029070	582510	582510	3347700	582510	974750	582510	5	6	582510	582510	13242970	582510	1984240	2752670	582510	1467600	582510	4	7	3	0	4	0	1	5	0	3	0	18.75	0	25	0	6.25	31.25	0	18.75	0	AFCat1
Q7TSV4;A0A0G2JG04 [Phosphoglucomutase-2 ...]	0	582510	582510	2089940	582510	582510	2673370	582510	1492280	582510	4	5	388340	388340	388340	388340	388340	1522370	388340	887360	388340	2	2	3	0	1	0	0	3	0	3	0	30	0	10	0	0	30	0	30	0	AFCat1
Q80W54 [CAAX prenyl protease 1 homolog ...]	0	194170	194170	194170	194170	690220	194170	194170	194170	194170	1	1	194170	194170	194170	194170	771030	194170	194170	194170	194170	1	1	0	0	0	0	2	0	0	0	0	0	0	0	0	100	0	0	0	0	AFCat1
Q80X90 [Filamin-B ...]	0	582510	4422840	16550340	582510	2041070	8580200	582510	3147620	582510	13	22	582510	582510	46499000	1987040	3215190	9354400	582510	3710620	582510	15	24	11	1	4	1	5	24	0	11	0	19.29824561	1.754385965	7.01754386	1.754385965	8.771929825	42.10526316	0	19.29824561	0	AFCat1
Q80YQ1;P35441;CON__Q28194 [Thrombospondin-1 ...]	0	582510	582510	35356300	582510	1575940	582510	582510	582510	582510	5	6	582510	582510	33302900	582510	1481340	582510	582510	582510	582510	5	6	0	0	10	0	2	0	0	0	0	0	0	83.33333333	0	16.66666667	0	0	0	0	AFCat1
Q80ZS7;Q9D0M5;P63168 [Dynein light chain 2, cytoplasmic;Dynein light cha ...]	0	194170	194170	5227900	194170	194170	194170	194170	194170	194170	1	1	194170	194170	4763500	194170	194170	194170	194170	194170	194170	1	1	0	0	2	0	0	0	0	0	0	0	0	100	0	0	0	0	0	0	AFCat1
Q82YW5 [ ...]	0	388340	388340	388340	1409410	388340	388340	388340	388340	388340	2	2	582510	582510	582510	1963570	582510	582510	582510	582510	582510	3	3	0	0	0	5	0	0	0	0	0	0	0	0	100	0	0	0	0	0	AFCat1
Q830Q5 [ ...]	0	388340	388340	388340	3402400	388340	388340	388340	388340	388340	2	2	194170	194170	194170	1928800	1021600	194170	194170	194170	194170	1	2	0	0	0	3	1	0	0	0	0	0	0	0	75	25	0	0	0	0	AFCat1
Q830Q6 [ ...]	0	194170	194170	194170	3454700	194170	194170	194170	194170	194170	1	1	194170	194170	194170	2878800	194170	194170	194170	194170	194170	1	1	0	0	0	2	0	0	0	0	0	0	0	0	100	0	0	0	0	0	AFCat1
Q830Q8 [ ...]	0	1772800	194170	194170	5994900	3861700	194170	361020	194170	194170	1	4	1536500	839760	194170	5720400	4175200	194170	349470	194170	194170	1	5	2	1	0	2	2	0	2	0	0	22.22222222	11.11111111	0	22.22222222	22.22222222	0	22.22222222	0	0	AFCat1
Q833I8;Q834V5 [ ...]	0	194170	194170	194170	3368200	194170	194170	194170	194170	194170	1	1	194170	194170	194170	3388500	194170	194170	194170	194170	194170	1	1	0	0	0	2	0	0	0	0	0	0	0	0	100	0	0	0	0	0	AFCat1
Q833I9 [ ...]	0	582510	582510	582510	7555800	3359710	582510	582510	582510	582510	5	5	388340	388340	388340	4152000	388340	388340	388340	388340	388340	2	2	0	0	0	5	2	0	0	0	0	0	0	0	71.42857143	28.57142857	0	0	0	0	AFCat1
Q834N1 [ ...]	0	194170	194170	194170	1778000	194170	194170	194170	194170	194170	1	1	388340	388340	388340	2956600	388340	388340	388340	388340	388340	2	2	0	0	0	3	0	0	0	0	0	0	0	0	100	0	0	0	0	0	AFCat1
Q834T3 [ ...]	0	388340	388340	388340	4818000	388340	388340	388340	388340	388340	2	2	388340	388340	388340	4731900	388340	388340	388340	388340	388340	2	2	0	0	0	4	0	0	0	0	0	0	0	0	100	0	0	0	0	0	AFCat1
Q835J8 [ ...]	0	194170	194170	194170	461400	194170	194170	194170	194170	194170	1	1	194170	194170	194170	469420	194170	194170	194170	194170	194170	1	1	0	0	0	2	0	0	0	0	0	0	0	0	100	0	0	0	0	0	AFCat1
Q835M1 [ ...]	0	388340	388340	388340	2084090	388340	388340	388340	388340	388340	2	2	194170	194170	194170	1459100	194170	194170	194170	194170	194170	1	1	0	0	0	3	0	0	0	0	0	0	0	0	100	0	0	0	0	0	AFCat1
Q835M2 [ ...]	0	194170	194170	194170	1838800	194170	194170	194170	194170	194170	1	1	194170	194170	194170	1629500	194170	194170	194170	194170	194170	1	1	0	0	0	2	0	0	0	0	0	0	0	0	100	0	0	0	0	0	AFCat1
Q835M3 [ ...]	0	1176120	388340	388340	4723700	1020040	388340	388340	388340	388340	2	4	1311270	927930	388340	2290770	388340	388340	388340	388340	388340	2	3	2	1	0	3	1	0	0	0	0	28.57142857	14.28571429	0	42.85714286	14.28571429	0	0	0	0	AFCat1
Q835M4 [ ...]	0	194170	194170	194170	1289700	194170	194170	194170	194170	194170	1	1	194170	194170	194170	1415000	194170	194170	194170	194170	194170	1	1	0	0	0	2	0	0	0	0	0	0	0	0	100	0	0	0	0	0	AFCat1
Q835R7 [ ...]	0	388340	388340	388340	3593200	388340	388340	388340	388340	388340	2	2	388340	388340	388340	2039270	1849870	388340	388340	388340	388340	2	2	0	0	0	3	1	0	0	0	0	0	0	0	75	25	0	0	0	0	AFCat1
Q839E8 [ ...]	0	194170	194170	194170	194170	1019800	194170	194170	194170	194170	1	1	194170	194170	194170	194170	848180	194170	194170	194170	194170	1	1	0	0	0	0	2	0	0	0	0	0	0	0	0	100	0	0	0	0	AFCat1
Q839F3 [ ...]	0	388340	388340	388340	5134800	388340	388340	388340	388340	388340	2	2	388340	388340	388340	5678700	388340	388340	388340	388340	388340	2	2	0	0	0	4	0	0	0	0	0	0	0	0	100	0	0	0	0	0	AFCat1
Q839F8 [ ...]	0	1780900	194170	194170	2186200	194170	194170	194170	194170	194170	1	2	2323400	194170	194170	2168700	194170	194170	194170	194170	194170	1	2	2	0	0	2	0	0	0	0	0	50	0	0	50	0	0	0	0	0	AFCat1
Q839G1 [ ...]	0	194170	194170	194170	597800	194170	194170	194170	194170	194170	1	1	194170	194170	194170	1235400	194170	194170	194170	194170	194170	1	1	0	0	0	2	0	0	0	0	0	0	0	0	100	0	0	0	0	0	AFCat1
Q839G5 [ ...]	0	194170	194170	194170	1930800	2649000	194170	194170	194170	194170	1	2	194170	194170	194170	1745500	2521700	194170	194170	194170	194170	1	2	0	0	0	2	2	0	0	0	0	0	0	0	50	50	0	0	0	0	AFCat1
Q839G8 [ ...]	0	5865570	582510	582510	13339900	10729170	582510	582510	582510	582510	4	7	5158670	582510	3477040	10643870	8770370	582510	582510	582510	582510	5	7	4	0	1	5	4	0	0	0	0	28.57142857	0	7.142857143	35.71428571	28.57142857	0	0	0	0	AFCat1
Q8BFR5;A0A0U1RNQ6 [Elongation factor Tu, mitochondrial ...]	0	388340	388340	388340	388340	388340	669130	388340	1162010	388340	2	3	194170	194170	194170	194170	194170	479940	194170	194170	194170	1	1	2	0	0	0	0	2	0	2	0	33.33333333	0	0	0	0	33.33333333	0	33.33333333	0	AFCat1
Q8BGQ7 [Alanine--tRNA ligase, cytoplasmic ...]	0	388340	388340	388340	388340	388340	1275180	388340	667100	388340	2	3	388340	388340	388340	388340	388340	692150	388340	609330	388340	2	2	2	0	0	0	0	3	0	2	0	28.57142857	0	0	0	0	42.85714286	0	28.57142857	0	AFCat1
Q8BH61 [Coagulation factor XIII A chain ...]	0	582510	5610640	43555000	582510	582510	582510	582510	582510	582510	6	6	582510	7276970	38996000	582510	582510	582510	582510	582510	582510	6	7	0	3	10	0	0	0	0	0	0	0	23.07692308	76.92307692	0	0	0	0	0	0	AFCat1
Q8BHN3 [Neutral alpha-glucosidase AB ...]	0	582510	582510	4918070	582510	582510	1256370	582510	582510	582510	3	3	388340	922110	6565500	388340	388340	388340	388340	388340	388340	2	3	0	1	4	0	0	1	0	0	0	0	16.66666667	66.66666667	0	0	16.66666667	0	0	0	AFCat1
Q8BJS4 [SUN domain-containing protein 2 ...]	0	582510	7219700	30481200	582510	1001290	582510	582510	582510	582510	4	7	582510	8135400	22634200	582510	1102270	582510	582510	582510	582510	5	7	0	6	6	0	2	0	0	0	0	0	42.85714286	42.85714286	0	14.28571429	0	0	0	0	AFCat1
Q8BJY1 [26S proteasome non-ATPase regulatory subunit 5 ...]	0	388340	388340	388340	388340	388340	3673260	388340	2284070	388340	2	3	388340	388340	388340	388340	388340	3567860	388340	2342370	388340	2	3	2	0	0	0	0	4	0	2	0	25	0	0	0	0	50	0	25	0	AFCat1
Q8BMS1 [Trifunctional enzyme subunit alpha, mitochondrial; ...]	0	582510	1556140	7970070	582510	1705440	582510	582510	3096180	582510	5	7	388340	388340	3447070	388340	1407870	388340	388340	388340	388340	2	2	3	1	3	0	2	0	0	3	0	25	8.333333333	25	0	16.66666667	0	0	25	0	AFCat1
Q8BND5 [Sulfhydryl oxidase 1 ...]	0	2915170	10504700	5108540	582510	582510	582510	582510	582510	582510	5	6	3873180	8235900	5897940	582510	582510	582510	582510	582510	582510	5	8	5	7	2	0	0	0	0	0	0	35.71428571	50	14.28571429	0	0	0	0	0	0	AFCat1
Q8BP67 [60S ribosomal protein L24 ...]	0	194170	194170	5908100	194170	194170	194170	194170	194170	194170	1	1	194170	194170	6206300	194170	194170	194170	194170	194170	194170	1	1	0	0	2	0	0	0	0	0	0	0	0	100	0	0	0	0	0	0	AFCat1
Q8BPU7 [Engulfment and cell motility protein 1 ...]	0	194170	194170	3599500	194170	194170	194170	194170	194170	194170	1	1	194170	194170	2305600	194170	194170	194170	194170	194170	194170	1	1	0	0	2	0	0	0	0	0	0	0	0	100	0	0	0	0	0	0	AFCat1
Q8BT60;Q9D6C8;A0A0R4J0J1;Q3UYN2;Q1RLL3;Q9Z140;Q8BLR2;Q0VE82;Q9DC53;Q8JZW4 [Copine-3 ...]	0	582510	3737270	48252000	582510	582510	582510	582510	582510	582510	4	5	582510	7864800	46176000	582510	582510	582510	582510	582510	582510	5	6	0	5	6	0	0	0	0	0	0	0	45.45454545	54.54545455	0	0	0	0	0	0	AFCat1
Q8C253;P16110 [Galectin;Galectin-3 ...]	0	6766970	25442800	133154000	582510	7038840	10687470	582510	5436440	582510	7	15	7647600	18761800	119409000	582510	582510	5182840	582510	9270570	582510	6	14	8	7	10	0	1	3	0	3	0	25	21.875	31.25	0	3.125	9.375	0	9.375	0	AFCat1
Q8C266;Q9CQD1;P61021;P35278;A2A5F6;A2A5F5 [Ras-related protein Rab-5A;Ras-related protein Rab ...]	0	194170	4302800	12916000	194170	2314900	194170	194170	194170	194170	1	3	388340	3927570	19663500	994440	1954270	1281470	388340	388340	388340	2	6	0	2	3	1	2	1	0	0	0	0	22.22222222	33.33333333	11.11111111	22.22222222	11.11111111	0	0	0	AFCat1
Q8C2Q7;P70333;O35737 [Heterogeneous nuclear ribonucleoprotein H2;Heterog ...]	0	388340	388340	11921400	388340	388340	1200270	388340	388340	388340	2	3	388340	2017870	18302100	388340	388340	388340	388340	388340	388340	2	3	0	1	4	0	0	1	0	0	0	0	16.66666667	66.66666667	0	0	16.66666667	0	0	0	AFCat1
Q8C845;Q9D8Y0 [EF-hand domain-containing protein D2 ...]	0	388340	388340	24369300	388340	388340	388340	388340	388340	388340	2	2	194170	194170	6734800	194170	194170	194170	194170	194170	194170	1	1	0	0	3	0	0	0	0	0	0	0	0	100	0	0	0	0	0	0	AFCat1
Q8CAG6;Q9JHK5 [Pleckstrin ...]	0	388340	2009870	16114500	388340	388340	388340	388340	388340	388340	2	3	194170	194170	11278000	194170	194170	194170	194170	194170	194170	1	1	0	1	3	0	0	0	0	0	0	0	25	75	0	0	0	0	0	0	AFCat1
Q8CB12;Q3TR54;Q2KHK6 [Gasdermin-C3;Gasdermin-C4;Gasdermin-C2 ...]	0	194170	194170	3459100	194170	194170	194170	194170	194170	194170	1	1	388340	388340	3185370	388340	388340	388340	388340	1186110	388340	2	2	1	0	2	0	0	0	0	1	0	25	0	50	0	0	0	0	25	0	AFCat1
Q8CB58;Q8BGJ5;Q922I7;F7C521;F7DCW4;E9QMW9;G8JL74;G3UXA6;Q8BHD7;P17225 [Polypyrimidine tract-binding protein 3;Polypyrimid ...]	0	388340	2352470	11101600	388340	388340	388340	388340	811880	388340	2	4	388340	752420	12445200	388340	388340	388340	388340	388340	388340	2	3	1	2	4	0	0	0	0	1	0	12.5	25	50	0	0	0	0	12.5	0	AFCat1
Q8CBB6;Q8CGP2;Q8CGP1;Q6ZWY9;Q64525;Q64478;Q64475;P10854;P10853;P70696;Q9D2U9;Q8CGP0;Q64524 [Histone H2B;Histone H2B type 1-P;Histone H2B type ...]	0	22498970	1155920000	3237690000	181456000	454064000	165428000	7734840	29659600	15013340	7	34	22813170	1087810000	3069590000	180941000	431040000	120302000	17847570	51877000	30614000	8	39	11	12	12	9	10	11	3	7	5	13.75	15	15	11.25	12.5	13.75	3.75	8.75	6.25	AFCat1
Q8CBG6;Q9CQ60;D3Z4X1;F6X8L5 [6-phosphogluconolactonase ...]	0	194170	194170	5239200	194170	1492400	1403500	194170	194170	194170	1	3	388340	1474370	16872600	388340	1442570	1506470	388340	388340	388340	2	5	0	1	3	0	2	2	0	0	0	0	12.5	37.5	0	25	25	0	0	0	AFCat1
Q8CG29;P70248;G3V011 [Unconventional myosin-If ...]	0	582510	582510	15466800	582510	582510	582510	582510	582510	582510	3	3	582510	582510	18095800	582510	582510	582510	582510	582510	582510	3	3	0	0	6	0	0	0	0	0	0	0	0	100	0	0	0	0	0	0	AFCat1
Q8CHP8 [Phosphoglycolate phosphatase ...]	0	194170	194170	3813700	194170	194170	194170	194170	194170	194170	1	1	388340	388340	5331800	388340	388340	388340	388340	388340	388340	2	2	0	0	3	0	0	0	0	0	0	0	0	100	0	0	0	0	0	0	AFCat1
Q8CI94 [Glycogen phosphorylase, brain form ...]	0	582510	8577740	55896800	582510	3219940	13496300	582510	3631680	582510	14	15	582510	8981740	35486300	582510	4708670	14184400	582510	4252210	582510	9	13	6	2	8	0	3	9	0	6	0	17.64705882	5.882352941	23.52941176	0	8.823529412	26.47058824	0	17.64705882	0	AFCat1
Q8CIH5 [1-phosphatidylinositol 4,5-bisphosphate phosphodie ...]	0	388340	388340	6916200	388340	388340	388340	388340	388340	388340	2	2	388340	388340	6174500	388340	388340	388340	388340	388340	388340	2	2	0	0	4	0	0	0	0	0	0	0	0	100	0	0	0	0	0	0	AFCat1
Q8CIN4 [Serine/threonine-protein kinase PAK 2;PAK-2p27;PAK ...]	0	388340	388340	6368970	388340	388340	1311170	388340	388340	388340	2	2	194170	194170	6240300	194170	194170	194170	194170	194170	194170	1	1	0	0	2	0	0	1	0	0	0	0	0	66.66666667	0	0	33.33333333	0	0	0	AFCat1
Q8K0E8 [Fibrinogen beta chain;Fibrinopeptide B;Fibrinogen ...]	0	108424000	293866000	97649000	36023100	144177000	33953300	18267070	582510	15726500	14	44	103969000	297997000	166171000	43031000	155525000	43038900	23601900	582510	4529490	15	49	15	23	8	11	15	8	6	0	7	16.12903226	24.7311828	8.602150538	11.82795699	16.12903226	8.602150538	6.451612903	0	7.52688172	AFCat1
Q8K1H9 [Odorant-binding protein 2a ...]	0	194170	3054200	194170	194170	194170	194170	194170	194170	194170	1	1	194170	2735000	194170	194170	194170	194170	194170	194170	194170	1	1	0	2	0	0	0	0	0	0	0	0	100	0	0	0	0	0	0	0	AFCat1
Q8K2B3 [Succinate dehydrogenase [ubiquinone] flavoprotein ...]	0	194170	194170	194170	194170	194170	194170	194170	621950	194170	1	1	194170	194170	194170	194170	194170	617700	194170	626120	194170	1	2	2	0	0	0	0	1	0	2	0	40	0	0	0	0	20	0	40	0	AFCat1
Q8QZY1 [Eukaryotic translation initiation factor 3 subunit ...]	0	194170	194170	194170	194170	194170	553660	194170	194170	194170	1	1	388340	388340	388340	388340	388340	1858510	388340	388340	388340	2	2	0	0	0	0	0	3	0	0	0	0	0	0	0	0	100	0	0	0	AFCat1
Q8R050;F7CE88;Q149F3 [Eukaryotic peptide chain release factor GTP-bindin ...]	0	194170	194170	194170	194170	194170	1404700	194170	194170	194170	1	1	194170	194170	194170	194170	194170	1339400	194170	194170	194170	1	1	0	0	0	0	0	2	0	0	0	0	0	0	0	0	100	0	0	0	AFCat1
Q8R0X7;D6REF7 [Sphingosine-1-phosphate lyase 1 ...]	0	388340	388340	4185170	388340	388340	2227370	388340	388340	388340	2	2	194170	194170	3208400	194170	194170	194170	194170	194170	194170	1	1	0	0	2	0	0	1	0	0	0	0	0	66.66666667	0	0	33.33333333	0	0	0	AFCat1
Q8R2S8 [CD177 antigen ...]	0	582510	8441740	71304000	582510	6356070	582510	582510	582510	582510	4	6	582510	12951270	80092000	582510	9987600	582510	582510	582510	582510	6	9	0	3	6	0	6	0	0	0	0	0	20	40	0	40	0	0	0	0	AFCat1
Q8VCU2;O70362 [Phosphatidylinositol-glycan-specific phospholipase ...]	0	1543340	1362980	582510	3167640	582510	582510	582510	582510	582510	4	5	1980000	4473770	582510	2906640	582510	582510	582510	582510	582510	3	6	3	3	0	5	0	0	0	0	0	27.27272727	27.27272727	0	45.45454545	0	0	0	0	0	AFCat1
Q8VDD5;Q5SV64;Q3UH59;Q61879;A0A2R8VKI5;Q8BXF2;A0A140LI60;E9Q264;A2AQP0 [Myosin-9 ...]	0	2679680	31369200	183766000	4166700	22508900	27423400	582510	8779100	582510	45	96	582510	33786000	191245000	4179000	20940700	20209500	582510	8679700	582510	44	98	14	51	69	7	25	28	0	12	0	6.796116505	24.75728155	33.49514563	3.398058252	12.13592233	13.59223301	0	5.825242718	0	AFCat1
Q8VDM4 [26S proteasome non-ATPase regulatory subunit 2 ...]	0	582510	582510	1904840	582510	582510	3099270	582510	582510	582510	3	3	194170	194170	194170	194170	194170	194170	194170	727420	194170	1	1	1	0	1	0	0	2	0	1	0	20	0	20	0	0	40	0	20	0	AFCat1
Q8VDN2;D3YYN7;A0A0G2JGX4;Q8VCE0;Q6PIC6;Q6PIE5;Q9WV27;Q9Z1W8 [Sodium/potassium-transporting ATPase subunit alpha ...]	0	194170	194170	194170	194170	194170	194170	194170	705000	194170	1	1	388340	388340	6767870	388340	388340	388340	388340	1143570	388340	2	3	3	0	1	0	0	0	0	3	0	42.85714286	0	14.28571429	0	0	0	0	42.85714286	0	AFCat1
Q8VDU4;E9PXI0;P27870;Q9R0C8 [Proto-oncogene vav;Guanine nucleotide exchange fac ...]	0	194170	194170	4337700	194170	194170	194170	194170	194170	194170	1	1	194170	194170	1801900	194170	194170	194170	194170	194170	194170	1	1	0	0	2	0	0	0	0	0	0	0	0	100	0	0	0	0	0	0	AFCat1
Q8VEK3 [Heterogeneous nuclear ribonucleoprotein U ...]	0	582510	2314240	20535300	582510	582510	1672840	582510	1655340	582510	6	8	582510	2299440	32187700	582510	582510	2555670	582510	1442740	582510	4	8	2	2	9	0	0	3	0	2	0	11.11111111	11.11111111	50	0	0	16.66666667	0	11.11111111	0	AFCat1
Q91V55;D3YYM6;D3Z1S8;P97461 [40S ribosomal protein S5;40S ribosomal protein S5, ...]	0	2561240	582510	7802170	582510	1767540	1836140	582510	582510	582510	4	5	582510	582510	5681940	582510	1960360	4243770	582510	582510	582510	3	5	1	0	3	0	3	3	0	0	0	10	0	30	0	30	30	0	0	0	AFCat1
Q91VB8;P01942 [Hemoglobin subunit alpha ...]	0	263149000	1964290000	6622100000	307257000	1477560000	92635170	286549900	188859170	9710640	12	40	330150000	1701860000	6642300000	211420170	1565155000	89930170	425340000	71468170	9225240	12	41	13	12	22	6	15	4	7	4	2	15.29411765	14.11764706	25.88235294	7.058823529	17.64705882	4.705882353	8.235294118	4.705882353	2.352941176	AFCat1
Q91X17;A0A140LI10 [Uromodulin;Uromodulin, secreted form ...]	0	223063000	181664000	582510	35688400	762560000	62226200	36824900	1063740	42985400	9	44	245294000	192251000	582510	15662300	734060000	74403000	41587000	582510	41995900	8	41	16	15	0	10	15	12	9	1	8	18.60465116	17.44186047	0	11.62790698	17.44186047	13.95348837	10.46511628	1.162790698	9.302325581	AFCat1
Q91X72;A0A1B0GS57 [Hemopexin ...]	0	104851000	205335000	527160000	77307000	46066000	14187100	12147070	2736670	582510	14	59	95544000	211563000	5.48E+08	83595000	53527000	15764400	16236200	3153270	3062940	17	62	26	23	24	16	12	12	7	5	1	20.63492063	18.25396825	19.04761905	12.6984127	9.523809524	9.523809524	5.555555556	3.968253968	0.793650794	AFCat1
Q91XL1 [ ...]	0	582510	15018670	9115370	582510	582510	582510	582510	582510	582510	3	4	194170	8701100	3825200	194170	194170	194170	194170	194170	194170	1	2	0	3	3	0	0	0	0	0	0	0	50	50	0	0	0	0	0	0	AFCat1
Q91YQ5;A0A0N4SUJ8 [Dolichyl-diphosphooligosaccharide--protein glycosy ...]	0	582510	582510	13979000	582510	582510	582510	582510	2157740	582510	3	4	388340	388340	12225200	388340	388340	388340	388340	388340	388340	2	2	1	0	5	0	0	0	0	1	0	14.28571429	0	71.42857143	0	0	0	0	14.28571429	0	AFCat1
Q91YR9;REV__Q3TVC7;REV__A0A0R4J177 [Prostaglandin reductase 1 ...]	0	582510	3451470	15010700	1286010	582510	9413040	582510	5129170	582510	5	9	582510	3034970	14165400	582510	582510	15291770	582510	1200740	582510	5	8	3	4	6	1	0	3	0	3	0	15	20	30	5	0	15	0	15	0	AFCat1
Q91Z25;Q9WV32;F6VVE6;D3Z6S0;F6THG2 [Actin-related protein 2/3 complex subunit 1B ...]	0	582510	20747670	124770000	582510	582510	582510	582510	582510	582510	6	7	582510	5936940	94470000	582510	582510	3204040	582510	582510	582510	4	5	0	3	8	0	0	1	0	0	0	0	25	66.66666667	0	0	8.333333333	0	0	0	AFCat1
Q91Z98 [Chitinase-like protein 4 ...]	0	582510	37562570	299460100	582510	4530940	1877440	582510	582510	582510	3	7	582510	42573040	296838200	582510	11506670	1422440	582510	582510	582510	3	9	0	5	6	0	3	2	0	0	0	0	31.25	37.5	0	18.75	12.5	0	0	0	AFCat1
Q921I1;D3YYR8;F7BAE9;E9Q2Q7;F7CJN9;E9Q939;CON__Q29443;CON__Q0IIK2;CON__Q2HJF0 [Serotransferrin ...]	0	464190000	849040000	1058500000	306561000	77564000	101469000	84342000	12390700	42812600	34	147	450920000	723510000	1023900000	314599000	156291000	87268000	89123000	20396800	40702100	36	144	66	57	54	38	24	21	14	15	17	21.56862745	18.62745098	17.64705882	12.41830065	7.843137255	6.862745098	4.575163399	4.901960784	5.555555556	AFCat1
Q921L6;Q60598 [Src substrate cortactin ...]	0	582510	582510	582510	582510	582510	4944610	582510	2389340	582510	3	4	582510	582510	582510	582510	1518440	4684400	582510	2020240	582510	3	5	2	0	0	0	1	6	0	2	0	18.18181818	0	0	0	9.090909091	54.54545455	0	18.18181818	0	AFCat1
Q921R2;P62301;A0A0U1RQ71 [40S ribosomal protein S13 ...]	0	388340	388340	12164170	1269670	388340	2252470	388340	1290270	388340	2	4	388340	388340	19224300	1192070	388340	2228170	388340	1265670	388340	2	5	2	0	3	2	0	2	0	2	0	18.18181818	0	27.27272727	18.18181818	0	18.18181818	0	18.18181818	0	AFCat1
Q922B2 [Aspartate--tRNA ligase, cytoplasmic ...]	0	582510	582510	16063470	582510	582510	582510	582510	869140	582510	3	3	582510	2935940	29231100	582510	582510	582510	582510	582510	582510	3	4	1	1	5	0	0	0	0	1	0	12.5	12.5	62.5	0	0	0	0	12.5	0	AFCat1
Q924B0;O55023;Q80ZJ2 [Inositol monophosphatase 1 ...]	0	582510	582510	19959500	582510	582510	1140660	582510	582510	582510	3	4	582510	582510	16454700	582510	582510	1130610	582510	582510	582510	3	4	0	0	6	0	0	2	0	0	0	0	0	75	0	0	25	0	0	0	AFCat1
Q93EU6 [ ...]	0	194170	194170	194170	194170	768110	194170	194170	194170	194170	1	1	388340	388340	388340	1246270	1032990	388340	388340	388340	388340	2	2	0	0	0	1	2	0	0	0	0	0	0	0	33.33333333	66.66666667	0	0	0	0	AFCat1
Q99JI6;A0A0G2JDL9;P62835;A0A0G2JE52;A0A0G2JED9;A0A1W2P777 [Ras-related protein Rap-1b;Ras-related protein Rap ...]	0	582510	11757900	51861000	1554140	8604000	1411040	582510	582510	582510	7	14	582510	10193970	82224000	582510	19010000	1396840	582510	582510	582510	6	12	0	5	12	1	6	2	0	0	0	0	19.23076923	46.15384615	3.846153846	23.07692308	7.692307692	0	0	0	AFCat1
Q99JY0;D3YXU1 [Trifunctional enzyme subunit beta, mitochondrial;3 ...]	0	1427140	582510	582510	582510	871680	2642880	582510	582510	582510	3	4	194170	194170	194170	194170	194170	194170	194170	2620600	194170	1	1	2	0	0	0	1	2	0	1	0	33.33333333	0	0	0	16.66666667	33.33333333	0	16.66666667	0	AFCat1
Q99JY9;A0A087WS98;A0A087WP86;A0A087WQ14;A0A087WRA1;Q641P0;A0A087WQ83 [Actin-related protein 3 ...]	0	582510	13720200	50895800	582510	582510	4403770	582510	582510	582510	5	9	582510	9836000	71948000	582510	582510	2858640	582510	1340390	582510	5	8	1	7	6	0	0	3	0	1	0	5.555555556	38.88888889	33.33333333	0	0	16.66666667	0	5.555555556	0	AFCat1
Q99KI0 [Aconitate hydratase, mitochondrial ...]	0	194170	194170	194170	194170	194170	194170	194170	835950	194170	1	1	388340	388340	388340	388340	388340	1453270	388340	1138490	388340	2	2	2	0	0	0	0	1	0	2	0	40	0	0	0	0	20	0	40	0	AFCat1
Q99KJ8 [Dynactin subunit 2 ...]	0	388340	388340	388340	388340	388340	904860	388340	988490	388340	2	3	388340	388340	388340	388340	388340	954010	388340	1087770	388340	2	3	4	0	0	0	0	2	0	4	0	40	0	0	0	0	20	0	40	0	AFCat1
Q99LB4;P24452;D3YZN3;D3YU77;D3YTL5;D3Z4K5 [Macrophage-capping protein ...]	0	582510	582510	40368900	2397340	3276240	5123270	582510	582510	582510	5	8	582510	582510	44397400	2197540	2763440	4164040	582510	2478840	582510	3	7	1	0	7	2	2	3	0	1	0	6.25	0	43.75	12.5	12.5	18.75	0	6.25	0	AFCat1
Q99P58 [Ras-related protein Rab-27B ...]	0	194170	194170	194170	194170	194170	1191700	194170	682550	194170	1	2	194170	194170	194170	194170	194170	194170	194170	812110	194170	1	1	2	0	0	0	0	1	0	2	0	40	0	0	0	0	20	0	40	0	AFCat1
Q99PT1 [Rho GDP-dissociation inhibitor 1 ...]	0	1217270	388340	15055170	388340	388340	6743900	388340	388340	388340	2	4	1221770	388340	16207170	388340	388340	3658870	388340	1628470	388340	2	4	3	0	2	0	0	3	0	1	0	33.33333333	0	22.22222222	0	0	33.33333333	0	11.11111111	0	AFCat1
Q9CPX4;A0A1B0GR60;P29391;A0A1B0GRH4;P49945;A0A1Y7VNT9 [Ferritin;Ferritin light chain 1;Ferritin light cha ...]	0	388340	4674770	65001000	388340	388340	388340	388340	388340	388340	2	3	1445640	6021340	147271000	582510	582510	582510	582510	582510	582510	4	6	1	2	6	0	0	0	0	0	0	11.11111111	22.22222222	66.66666667	0	0	0	0	0	0	AFCat1
Q9CQI6;A0A1D5RLP1 [Coactosin-like protein ...]	0	582510	24158170	49213170	1697840	3845740	582510	582510	582510	582510	3	6	582510	23593900	37618170	582510	8768070	1359380	582510	582510	582510	3	8	0	5	4	1	3	1	0	0	0	0	35.71428571	28.57142857	7.142857143	21.42857143	7.142857143	0	0	0	AFCat1
Q9CQR2 [40S ribosomal protein S21 ...]	0	761210	388340	4233270	731170	388340	4420770	388340	3604470	388340	2	5	388340	388340	388340	388340	388340	388340	388340	4431900	388340	2	2	4	0	1	1	0	1	0	3	0	40	0	10	10	0	10	0	30	0	AFCat1
Q9CQV8;A2A5N1 [14-3-3 protein beta/alpha;14-3-3 protein beta/alph ...]	0	3560440	45552500	203875000	23630300	35015900	77719900	2839540	4215640	6347340	6	24	582510	13827870	32459870	25821600	17614340	84340900	6830870	582510	6334340	6	16	2	5	7	8	5	8	3	1	2	4.87804878	12.19512195	17.07317073	19.51219512	12.19512195	19.51219512	7.317073171	2.43902439	4.87804878	AFCat1
Q9CQW9;A0A1B0GT68;Q99J93 [Interferon-induced transmembrane protein 3;Interfe ...]	0	194170	194170	11713000	194170	194170	194170	194170	194170	194170	1	1	194170	194170	7748900	194170	194170	194170	194170	194170	194170	1	1	0	0	2	0	0	0	0	0	0	0	0	100	0	0	0	0	0	0	AFCat1
Q9CR16 [Peptidyl-prolyl cis-trans isomerase D ...]	0	194170	194170	5252400	194170	194170	194170	194170	194170	194170	1	1	194170	194170	6358500	194170	194170	194170	194170	194170	194170	1	1	0	0	2	0	0	0	0	0	0	0	0	100	0	0	0	0	0	0	AFCat1
Q9CR57 [60S ribosomal protein L14 ...]	0	388340	1571570	12042500	944950	3102170	1678170	388340	1402970	388340	2	7	388340	1502870	9139970	1127950	3190870	2790200	388340	388340	388340	2	6	1	2	3	2	2	3	0	1	0	7.142857143	14.28571429	21.42857143	14.28571429	14.28571429	21.42857143	0	7.142857143	0	AFCat1
Q9CVB6;D3YXG6;A0A087WRT2 [Actin-related protein 2/3 complex subunit 2 ...]	0	582510	20676600	78788000	1773840	1392940	6327140	582510	1454840	999730	7	16	1119900	18251400	68228000	1576140	1400840	8130160	582510	1326920	1066020	6	17	3	7	13	2	2	4	0	2	2	8.571428571	20	37.14285714	5.714285714	5.714285714	11.42857143	0	5.714285714	5.714285714	AFCat1
Q9CWJ9 [Bifunctional purine biosynthesis protein PURH;Phos ...]	0	194170	194170	3652400	194170	194170	194170	194170	194170	194170	1	1	582510	582510	7945970	582510	582510	1691540	582510	582510	582510	3	3	0	0	3	0	0	1	0	0	0	0	0	75	0	0	25	0	0	0	AFCat1
Q9CX34 [Suppressor of G2 allele of SKP1 homolog ...]	0	194170	194170	194170	194170	851330	2307600	194170	194170	194170	1	2	388340	388340	5716400	388340	1258070	2141270	388340	718440	388340	2	5	1	0	2	0	2	2	0	1	0	12.5	0	25	0	25	25	0	12.5	0	AFCat1
Q9CZ13;A0A0A6YW82 [Cytochrome b-c1 complex subunit 1, mitochondrial ...]	0	388340	388340	7546500	388340	388340	1488970	388340	388340	388340	2	3	388340	388340	7543500	388340	388340	388340	388340	2218170	388340	2	3	1	0	4	0	0	1	0	1	0	14.28571429	0	57.14285714	0	0	14.28571429	0	14.28571429	0	AFCat1
Q9CZM2;B8JKK2 [60S ribosomal protein L15;Ribosomal protein L15 ...]	0	567500	388340	6811670	1184440	388340	2946070	388340	2385170	388340	2	5	388340	1302770	13055700	1237270	1451570	3052370	388340	2345070	388340	2	7	3	1	3	2	1	2	0	2	0	21.42857143	7.142857143	21.42857143	14.28571429	7.142857143	14.28571429	0	14.28571429	0	AFCat1
Q9CZX8;D3YUT3;D3YUG3;D3Z5R8;D3Z722;S4R223 [40S ribosomal protein S19 ...]	0	1623840	1669540	19737100	582510	2179240	1830540	582510	5089560	582510	3	9	1138570	582510	11761570	582510	582510	1788740	582510	5051270	582510	3	6	6	1	5	0	1	2	0	4	0	31.57894737	5.263157895	26.31578947	0	5.263157895	10.52631579	0	21.05263158	0	AFCat1
Q9D0I9 [Arginine--tRNA ligase, cytoplasmic ...]	0	194170	194170	6229300	194170	194170	194170	194170	194170	194170	1	1	194170	194170	3467600	194170	194170	194170	194170	194170	194170	1	1	0	0	2	0	0	0	0	0	0	0	0	100	0	0	0	0	0	0	AFCat1
Q9D0J8 [Parathymosin ...]	0	1108900	194170	194170	1509800	194170	1665200	194170	910730	194170	1	4	1073900	194170	194170	194170	194170	1379700	194170	810280	194170	1	3	4	0	0	1	0	2	0	2	0	44.44444444	0	0	11.11111111	0	22.22222222	0	22.22222222	0	AFCat1
Q9D132 [Uroplakin-1a ...]	0	7774000	388340	388340	388340	388340	2598170	388340	388340	388340	2	3	7679400	4598870	388340	388340	388340	2655370	388340	388340	388340	2	4	4	1	0	0	0	2	0	0	0	57.14285714	14.28571429	0	0	0	28.57142857	0	0	0	AFCat1
Q9D154;Z4YK03;Q8VHP7;Q5SV42 [Leukocyte elastase inhibitor A ...]	0	582510	26425600	121714000	3875270	16473000	6760870	582510	582510	582510	13	27	582510	38672200	175386000	1538740	14986100	582510	582510	582510	582510	16	27	0	15	25	3	9	2	0	0	0	0	27.77777778	46.2962963	5.555555556	16.66666667	3.703703704	0	0	0	AFCat1
Q9D2V7 [Coronin-7 ...]	0	194170	194170	4043900	194170	194170	194170	194170	194170	194170	1	1	388340	388340	9174700	388340	388340	388340	388340	388340	388340	2	2	0	0	3	0	0	0	0	0	0	0	0	100	0	0	0	0	0	0	AFCat1
Q9D668 [Arrestin domain-containing protein 2 ...]	0	194170	194170	7783100	194170	194170	194170	194170	194170	194170	1	1	2327300	194170	6761300	194170	194170	194170	194170	194170	194170	1	2	1	0	2	0	0	0	0	0	0	33.33333333	0	66.66666667	0	0	0	0	0	0	AFCat1
Q9D6Y7;A0A1B0GT40 [Mitochondrial peptide methionine sulfoxide reducta ...]	0	388340	2059570	16889170	388340	1119330	388340	388340	388340	388340	2	3	194170	1795500	15902000	194170	194170	194170	194170	194170	194170	1	2	0	2	2	0	1	0	0	0	0	0	40	40	0	20	0	0	0	0	AFCat1
Q9D819 [Inorganic pyrophosphatase ...]	0	194170	712140	194170	194170	194170	194170	194170	194170	194170	1	1	194170	194170	194170	194170	194170	3790800	194170	2420800	194170	1	2	1	1	0	0	0	1	0	1	0	25	25	0	0	0	25	0	25	0	AFCat1
Q9D898 [Actin-related protein 2/3 complex subunit 5-like p ...]	0	194170	194170	2239300	194170	194170	194170	194170	194170	194170	1	1	194170	194170	2263600	194170	194170	736990	194170	562010	194170	1	3	1	0	2	0	0	1	0	1	0	20	0	40	0	0	20	0	20	0	AFCat1
Q9D8D6;B2RV77 [ ...]	0	194170	194170	6508700	194170	194170	194170	194170	194170	194170	1	1	194170	194170	5629900	194170	194170	194170	194170	194170	194170	1	1	0	0	2	0	0	0	0	0	0	0	0	100	0	0	0	0	0	0	AFCat1
Q9D8E6 [60S ribosomal protein L4 ...]	0	194170	194170	194170	194170	194170	2920600	194170	194170	194170	1	1	582510	582510	11887770	582510	582510	2922040	582510	1264210	582510	4	4	1	0	2	0	0	2	0	1	0	16.66666667	0	33.33333333	0	0	33.33333333	0	16.66666667	0	AFCat1
Q9D8N0 [Elongation factor 1-gamma ...]	0	582510	2277140	6312040	582510	1875440	4117760	582510	2578040	582510	3	6	1224620	2485240	22782170	582510	582510	7078900	582510	2188940	582510	4	8	3	2	3	0	1	5	0	2	0	18.75	12.5	18.75	0	6.25	31.25	0	12.5	0	AFCat1
Q9D997;Q9QZ08;D3YXG2 [N-acetyl-D-glucosamine kinase ...]	0	194170	194170	194170	194170	194170	1061400	194170	194170	194170	1	1	194170	194170	194170	194170	194170	871080	194170	194170	194170	1	1	0	0	0	0	0	2	0	0	0	0	0	0	0	0	100	0	0	0	AFCat1
Q9DAY9;Q5SQB0;Q5SQB5;Q61937 [Nucleophosmin ...]	0	388340	2087970	13938400	388340	388340	388340	388340	388340	388340	2	3	388340	2189170	388340	388340	388340	3092470	388340	388340	388340	2	2	0	2	2	0	0	1	0	0	0	0	40	40	0	0	20	0	0	0	AFCat1
Q9DB77;A0A140LI98 [Cytochrome b-c1 complex subunit 2, mitochondrial ...]	0	194170	194170	194170	194170	194170	194170	194170	1001400	194170	1	1	388340	388340	12798900	388340	388340	388340	388340	388340	388340	2	2	1	0	2	0	0	0	0	1	0	25	0	50	0	0	0	0	25	0	AFCat1
Q9DBB9 [Carboxypeptidase N subunit 2 ...]	0	3553170	6040970	9672140	3275340	582510	582510	582510	582510	582510	4	6	2766740	5975370	20586070	4144370	582510	582510	582510	582510	582510	5	7	3	4	3	3	0	0	0	0	0	23.07692308	30.76923077	23.07692308	23.07692308	0	0	0	0	0	AFCat1
Q9DBJ1;O70250 [Phosphoglycerate mutase 1;Phosphoglycerate mutase ...]	0	582510	18402300	129593000	582510	582510	1072490	582510	1763640	582510	5	10	1426140	16008900	116245000	582510	5485840	1650540	582510	582510	582510	6	11	2	6	10	0	1	2	0	1	0	9.090909091	27.27272727	45.45454545	0	4.545454545	9.090909091	0	4.545454545	0	AFCat1
Q9DBS1 [Transmembrane protein 43 ...]	0	194170	194170	4334600	194170	194170	194170	194170	194170	194170	1	1	194170	194170	3481700	194170	194170	194170	194170	194170	194170	1	1	0	0	2	0	0	0	0	0	0	0	0	100	0	0	0	0	0	0	AFCat1
Q9DC51 [Guanine nucleotide-binding protein G(k) subunit al ...]	0	582510	18114300	50387800	582510	3180740	582510	582510	582510	582510	5	9	582510	15844200	33145200	582510	2739440	840190	582510	582510	582510	5	9	0	8	7	0	2	1	0	0	0	0	44.44444444	38.88888889	0	11.11111111	5.555555556	0	0	0	AFCat1
Q9DCD0 [6-phosphogluconate dehydrogenase, decarboxylating ...]	0	582510	47990000	158754000	2140340	15172400	21159800	582510	582510	1628040	8	20	582510	40553900	225844000	3707470	10767470	19803500	582510	582510	582510	8	20	0	9	14	3	5	8	0	0	1	0	22.5	35	7.5	12.5	20	0	0	2.5	AFCat1
Q9DCM0 [Persulfide dioxygenase ETHE1, mitochondrial ...]	0	194170	1772200	8452200	194170	194170	194170	194170	194170	194170	1	2	194170	2233400	9627900	194170	194170	194170	194170	194170	194170	1	2	0	2	2	0	0	0	0	0	0	0	50	50	0	0	0	0	0	0	AFCat1
Q9EQ06 [Estradiol 17-beta-dehydrogenase 11 ...]	0	388340	388340	20200400	388340	388340	388340	388340	997350	388340	2	3	582510	2061940	26294300	582510	582510	1072990	582510	1206490	582510	3	6	2	1	5	0	0	1	0	2	0	18.18181818	9.090909091	45.45454545	0	0	9.090909091	0	18.18181818	0	AFCat1
Q9EQ20 [Methylmalonate-semialdehyde dehydrogenase [acylati ...]	0	194170	194170	194170	194170	194170	194170	194170	535960	194170	1	1	388340	388340	388340	388340	388340	1016470	388340	388340	388340	2	2	1	0	0	0	0	2	0	1	0	25	0	0	0	0	50	0	25	0	AFCat1
Q9EQH3 [Vacuolar protein sorting-associated protein 35 ...]	0	388340	738880	5659470	388340	388340	388340	388340	388340	388340	2	2	194170	194170	5212400	194170	194170	194170	194170	194170	194170	1	1	0	1	2	0	0	0	0	0	0	0	33.33333333	66.66666667	0	0	0	0	0	0	AFCat1
Q9ERI2 [Ras-related protein Rab-27A ...]	0	388340	388340	16029000	388340	388340	388340	388340	388340	388340	2	2	388340	388340	16466500	388340	388340	388340	388340	388340	388340	2	2	0	0	4	0	0	0	0	0	0	0	0	100	0	0	0	0	0	0	AFCat1
Q9ERL7;D3Z2F6;D3YY16;A0A2I3BR94;A0A2I3BPS1;Q9CQI3 [Glia maturation factor gamma;Glia maturation facto ...]	0	194170	5486700	194170	194170	2703300	194170	194170	194170	194170	1	2	388340	8147300	4456770	388340	2935170	1104700	388340	388340	388340	2	5	0	3	1	0	2	1	0	0	0	0	42.85714286	14.28571429	0	28.57142857	14.28571429	0	0	0	AFCat1
Q9ET01;Q3UEJ6;E9PUM3 [Glycogen phosphorylase, liver form;Alpha-1,4 gluca ...]	0	582510	15821500	69213000	582510	3219940	582510	582510	582510	582510	15	21	582510	15031100	67332000	582510	3430140	10902300	582510	2979140	582510	13	19	1	11	23	0	2	3	0	1	0	2.43902439	26.82926829	56.09756098	0	4.87804878	7.317073171	0	2.43902439	0	AFCat1
Q9JI91;O88990 [Alpha-actinin-2;Alpha-actinin-3 ...]	0	194170	194170	194170	194170	194170	194170	194170	194170	1747100	1	1	194170	194170	1437500	194170	194170	194170	194170	194170	194170	1	1	0	0	1	0	0	0	0	0	1	0	0	50	0	0	0	0	0	50	AFCat1
Q9JI95;Q64433 [10 kDa heat shock protein, mitochondrial ...]	0	388340	3342900	16805600	388340	1125330	1771370	388340	388340	388340	2	6	582510	582510	18423070	582510	582510	1865740	582510	2715340	582510	3	4	1	2	4	0	1	2	0	1	0	9.090909091	18.18181818	36.36363636	0	9.090909091	18.18181818	0	9.090909091	0	AFCat1
Q9JII6;B1AXW3 [Alcohol dehydrogenase [NADP(+)] ...]	0	194170	194170	194170	617170	194170	4432600	194170	1145000	194170	1	3	1257480	582510	582510	582510	582510	4072170	582510	1434640	582510	3	4	3	0	0	1	0	3	0	2	0	33.33333333	0	0	11.11111111	0	33.33333333	0	22.22222222	0	AFCat1
Q9JKF1;A0A0U1RNG5;Q3UQ44;A0A0U1RPU3;Q3UQP1;F8VQ29 [Ras GTPase-activating-like protein IQGAP1 ...]	0	582510	11396400	83095000	582510	1888840	942970	582510	582510	582510	17	25	582510	10540600	74118000	582510	3916270	582510	582510	582510	582510	14	19	0	15	25	0	3	1	0	0	0	0	34.09090909	56.81818182	0	6.818181818	2.272727273	0	0	0	AFCat1
Q9JKX8 [Uroplakin-3a ...]	0	194170	194170	194170	194170	194170	194170	194170	3158800	194170	1	1	388340	388340	388340	388340	388340	388340	388340	3527610	388340	2	2	3	0	0	0	0	0	0	3	0	50	0	0	0	0	0	0	50	0	AFCat1
Q9JM76;H7BWZ3;A0A0G2JFK7;D3Z2F7;D3Z2F8 [Actin-related protein 2/3 complex subunit 3 ...]	0	582510	16508070	44230700	582510	582510	4930870	582510	582510	582510	4	7	582510	15575270	60225000	582510	582510	3941940	582510	582510	582510	5	7	0	4	7	0	0	3	0	0	0	0	28.57142857	50	0	0	21.42857143	0	0	0	AFCat1
Q9QUI0;A0A0A6YXF6;Q62159;A0A0G2JEP8;H3BL56;A0A0A6YWJ1;Q9CR99;P62746 [Transforming protein RhoA;Rho-related GTP-binding ...]	0	582510	18542600	52983000	582510	2820670	3855970	582510	582510	582510	5	12	1211770	9899270	32285600	582510	1185670	1898040	582510	582510	582510	4	8	1	5	8	0	3	3	0	0	0	5	25	40	0	15	15	0	0	0	AFCat1
Q9QUM9;E0CXB1 [Proteasome subunit alpha type-6 ...]	0	388340	388340	28739100	388340	388340	388340	388340	388340	388340	2	2	388340	388340	27705400	388340	388340	388340	388340	388340	388340	2	2	0	0	4	0	0	0	0	0	0	0	0	100	0	0	0	0	0	0	AFCat1
Q9QXC1;Q6YJU1 [Fetuin-B ...]	0	3541770	10999170	20370400	3053470	388340	388340	388340	388340	388340	2	5	3747970	11241170	14830170	4913400	388340	895070	388340	388340	388340	2	6	2	2	3	3	0	1	0	0	0	18.18181818	18.18181818	27.27272727	27.27272727	0	9.090909091	0	0	0	AFCat1
Q9QXT9 [Zinc finger protein 354B ...]	0	9550900	194170	194170	7262600	194170	194170	194170	194170	194170	1	2	9627100	194170	194170	6748500	194170	194170	194170	194170	194170	1	2	2	0	0	2	0	0	0	0	0	50	0	0	50	0	0	0	0	0	AFCat1
Q9QZQ8;Q8CCK0 [Core histone macro-H2A.1 ...]	0	582510	6822970	25473500	582510	582510	1098840	582510	1447940	582510	4	7	582510	5140070	24266600	582510	1005860	1182170	582510	1539240	582510	4	9	2	4	7	0	1	2	0	2	0	11.11111111	22.22222222	38.88888889	0	5.555555556	11.11111111	0	11.11111111	0	AFCat1
Q9R0P5;P45591 [Destrin ...]	0	3105540	13183870	49611000	2878840	1775840	43365600	1063270	4881550	582510	7	16	4058340	12461370	48326000	2979340	1779440	17736300	582510	3865040	582510	5	13	5	4	9	2	2	6	1	3	0	15.625	12.5	28.125	6.25	6.25	18.75	3.125	9.375	0	AFCat1
Q9R0P9 [Ubiquitin carboxyl-terminal hydrolase isozyme L1 ...]	0	1201590	3091440	582510	1616040	7479770	47324000	582510	25771700	1443540	4	12	582510	8612600	582510	1142670	7525870	29316170	582510	26519800	1448740	5	13	8	4	0	2	4	5	0	7	2	25	12.5	0	6.25	12.5	15.625	0	21.875	6.25	AFCat1
Q9R0Q6 [Actin-related protein 2/3 complex subunit 1A ...]	0	194170	194170	194170	194170	194170	2000400	194170	862260	194170	1	2	194170	194170	194170	194170	194170	1138400	194170	194170	194170	1	1	1	0	0	0	0	2	0	1	0	25	0	0	0	0	50	0	25	0	AFCat1
Q9R111;D3YU09;A0A494B982 [Guanine deaminase ...]	0	582510	2657640	29741700	582510	582510	582510	582510	582510	582510	3	4	582510	582510	51279900	582510	582510	582510	582510	582510	582510	6	6	0	1	9	0	0	0	0	0	0	0	10	90	0	0	0	0	0	0	AFCat1
Q9R1P3 [Proteasome subunit beta type-2 ...]	0	194170	194170	10855000	194170	194170	194170	194170	194170	194170	1	1	388340	1040030	9906570	388340	1223370	796020	388340	388340	388340	2	4	0	1	2	0	1	1	0	0	0	0	20	40	0	20	20	0	0	0	AFCat1
Q9WTL2 [Ras-related protein Rab-25 ...]	0	388340	2456170	7356270	388340	388340	819000	388340	1904910	388340	2	5	582510	2992240	7533140	582510	582510	1808050	582510	908300	582510	3	5	3	2	2	0	0	3	0	3	0	23.07692308	15.38461538	15.38461538	0	0	23.07692308	0	23.07692308	0	AFCat1
Q9WU78 [Programmed cell death 6-interacting protein ...]	0	194170	194170	2332400	194170	194170	194170	194170	194170	194170	1	1	388340	388340	7122600	388340	388340	388340	388340	388340	388340	2	2	0	0	3	0	0	0	0	0	0	0	0	100	0	0	0	0	0	0	AFCat1
Q9WUH2 [LIM/homeobox protein Lhx9 ...]	0	194170	194170	194170	194170	3948500	194170	194170	194170	194170	1	1	194170	194170	194170	194170	3440700	194170	194170	194170	194170	1	1	0	0	0	0	2	0	0	0	0	0	0	0	0	100	0	0	0	0	AFCat1
Q9WUM3;D3YUG6;A0A494B9Y4 [Coronin-1B;Coronin ...]	0	388340	388340	11678170	388340	388340	784460	388340	388340	388340	2	2	194170	194170	3276500	194170	194170	194170	194170	194170	194170	1	1	0	0	2	0	0	1	0	0	0	0	0	66.66666667	0	0	33.33333333	0	0	0	AFCat1
Q9WV55 [Vesicle-associated membrane protein-associated pro ...]	0	194170	194170	6592200	194170	194170	194170	194170	194170	194170	1	1	194170	2364700	8671900	194170	194170	194170	194170	194170	194170	1	2	0	1	2	0	0	0	0	0	0	0	33.33333333	66.66666667	0	0	0	0	0	0	AFCat1
Q9WVA4;A0A0A6YXG6;Q9R1Q8 [Transgelin-2 ...]	0	582510	12093340	76708000	582510	582510	2169540	582510	582510	582510	4	6	582510	9018840	68793000	582510	5745470	1933140	582510	582510	582510	6	9	0	2	9	0	2	2	0	0	0	0	13.33333333	60	0	13.33333333	13.33333333	0	0	0	AFCat1
Q9WVF5;Q01279 [Epidermal growth factor receptor ...]	0	582510	2282940	4759740	582510	582510	582510	582510	582510	582510	3	3	194170	1389700	194170	194170	194170	194170	194170	194170	194170	1	1	0	3	1	0	0	0	0	0	0	0	75	25	0	0	0	0	0	0	AFCat1
Q9WVK4 [EH domain-containing protein 1 ...]	0	388340	388340	21085400	388340	388340	388340	388340	388340	388340	2	2	388340	388340	18130600	388340	388340	388340	388340	388340	388340	2	2	0	0	4	0	0	0	0	0	0	0	0	100	0	0	0	0	0	0	AFCat1
Q9Z183;E9QAM4;Q9Z184 [Protein-arginine deiminase type-4 ...]	0	388340	3700870	30455000	388340	388340	388340	388340	388340	388340	2	3	582510	3950440	45128000	582510	582510	582510	582510	582510	582510	3	4	0	2	5	0	0	0	0	0	0	0	28.57142857	71.42857143	0	0	0	0	0	0	AFCat1
Q9Z1N5;G3UXI6;Q8VDW0;D6RHT5 [Spliceosome RNA helicase Ddx39b;ATP-dependent RNA ...]	0	582510	582510	27257900	582510	582510	582510	582510	1341620	582510	5	6	582510	582510	25575600	582510	582510	582510	582510	1132830	582510	4	5	3	0	8	0	0	0	0	3	0	21.42857143	0	57.14285714	0	0	0	0	21.42857143	0	AFCat1
Q9Z1Q5 [Chloride intracellular channel protein 1 ...]	0	582510	7807570	30079200	1256750	582510	2372240	582510	582510	582510	4	7	582510	11825300	37208700	582510	582510	2777920	582510	582510	582510	4	9	0	5	7	1	0	3	0	0	0	0	31.25	43.75	6.25	0	18.75	0	0	0	AFCat1
Q9Z2M7 [Phosphomannomutase 2 ...]	0	388340	388340	388340	388340	388340	2136880	388340	994350	388340	2	3	388340	388340	388340	388340	388340	1961640	388340	388340	388340	2	2	1	0	0	0	0	4	0	1	0	16.66666667	0	0	0	0	66.66666667	0	16.66666667	0	AFCat1
Q9Z2U0;A0A338P7D7;Q9CWH6;B7ZMS4 [Proteasome subunit alpha type-7;Proteasome subunit ...]	0	1128930	2697140	28107000	582510	1670140	6806770	582510	582510	582510	3	8	582510	3710970	36200800	1189310	1636940	6825600	582510	1614240	582510	4	11	2	3	6	1	2	5	0	1	0	10	15	30	5	10	25	0	5	0	AFCat1
Q9Z2U1 [Proteasome subunit alpha type-5 ...]	0	194170	194170	5521900	194170	194170	1425400	194170	194170	194170	1	2	194170	1378800	6041900	194170	194170	1421700	194170	194170	194170	1	3	0	1	2	0	0	2	0	0	0	0	20	40	0	0	40	0	0	0	AFCat1
Q9Z2X1;J3QM80;J3QMT0 [Heterogeneous nuclear ribonucleoprotein F;Heteroge ...]	0	388340	388340	16370700	388340	388340	388340	388340	1759270	388340	2	3	388340	388340	17954500	388340	388340	388340	388340	1771170	388340	2	3	2	0	4	0	0	0	0	2	0	25	0	50	0	0	0	0	25	0	AFCat1
S4R1M0;P06800 [Protein-tyrosine-phosphatase;Receptor-type tyrosin ...]	0	582510	582510	15731600	582510	582510	582510	582510	582510	582510	3	3	388340	388340	7408400	388340	388340	388340	388340	388340	388340	2	2	0	0	5	0	0	0	0	0	0	0	0	100	0	0	0	0	0	0	AFCat1
S4R1N6;F6YVP7;P62270;A0A1Y7VKY1;A0A3Q4EGP3 [40S ribosomal protein S18 ...]	0	1348600	1655940	22445000	2306540	2245940	4820540	582510	2809540	582510	4	9	1386730	1658240	22937800	2213840	582510	4723120	582510	2999940	582510	5	10	5	2	6	2	1	3	0	3	0	22.72727273	9.090909091	27.27272727	9.090909091	4.545454545	13.63636364	0	13.63636364	0	AFCat1
S4R1W1;P16858;A0A1D5RLD8;A0A0A0MQF6;S4R257;S4R1W8;V9GX06;A0A0R4J0X7;S4R2G5;Q64467;S4R1N5;V9GXK0 [Glyceraldehyde-3-phosphate dehydrogenase ...]	0	12509070	46057000	493650000	26206770	29820170	19813870	5616840	7485070	582510	6	21	14717970	68901000	499510000	30535100	61432000	61179000	5334940	8676710	1431040	12	31	9	9	13	5	6	7	2	5	1	15.78947368	15.78947368	22.80701754	8.771929825	10.52631579	12.28070175	3.50877193	8.771929825	1.754385965	AFCat1
S4R293;F8WH69;Q09014 [Neutrophil cytosol factor 1 ...]	0	582510	3695540	36148000	582510	582510	582510	582510	582510	582510	3	4	582510	5272270	27980700	582510	3680040	582510	582510	582510	582510	3	6	0	3	6	0	1	0	0	0	0	0	30	60	0	10	0	0	0	0	AFCat1
Z4YKB8;Q3TEA8;A2AM65;Z4YKA3;A2AM63;A2AM69;A2AM70;A2AM62 [Heterochromatin protein 1-binding protein 3 ...]	0	582510	1139510	10532070	582510	877890	582510	582510	582510	582510	3	4	388340	388340	6591300	388340	388340	388340	388340	388340	388340	2	2	0	1	4	0	1	0	0	0	0	0	16.66666667	66.66666667	0	16.66666667	0	0	0	0	AFCat1
