# Supplementary material for: Inhibiting host-protein deposition on urinary catheters reduces associated urinary tract infections
Source: eLife. 2022 Mar 29;11:e75798. doi: 10.7554/eLife.75798 (PMC8986317; doi:10.7554/eLife.75798)
Supplement: Figure 6—source data 1. — Individual data from all figures involving small datasets displayed in individual tabs of this source file. This includes Figures 1B and 2A-F, Figure 3B, Figure 4, Figure 1—figure supplement 1 and Figure 2—figure supplement 1. [file elife-75798-fig6-data1.zip › Flores_Data/AF1_results_AFCat1.txt]

Protein	avg log2 Cat_3/Cat_1	avg log2 Cat_4/Cat_1	avg log2 Cat_5/Cat_1	avg log2 Cat_6/Cat_1	avg log2 Cat_7/Cat_1	avg log2 Cat_8/Cat_1	avg log2 Cat_10/Cat_1	avg log2 Cat_9/Cat_1	avg log2 Cat_4/Cat_3	avg log2 Cat_5/Cat_3	avg log2 Cat_6/Cat_3	avg log2 Cat_7/Cat_3	avg log2 Cat_8/Cat_3	avg log2 Cat_10/Cat_3	avg log2 Cat_9/Cat_3	avg log2 Cat_5/Cat_4	avg log2 Cat_6/Cat_4	avg log2 Cat_7/Cat_4	avg log2 Cat_8/Cat_4	avg log2 Cat_10/Cat_4	avg log2 Cat_9/Cat_4	avg log2 Cat_6/Cat_5	avg log2 Cat_7/Cat_5	avg log2 Cat_8/Cat_5	avg log2 Cat_10/Cat_5	avg log2 Cat_9/Cat_5	avg log2 Cat_7/Cat_6	avg log2 Cat_8/Cat_6	avg log2 Cat_10/Cat_6	avg log2 Cat_9/Cat_6	avg log2 Cat_8/Cat_7	avg log2 Cat_10/Cat_7	avg log2 Cat_9/Cat_7	avg log2 Cat_10/Cat_8	avg log2 Cat_9/Cat_8	avg log2 Cat_9/Cat_10	P-value adjusted Cat_3/Cat_1	P-value adjusted Cat_4/Cat_1	P-value adjusted Cat_5/Cat_1	P-value adjusted Cat_6/Cat_1	P-value adjusted Cat_7/Cat_1	P-value adjusted Cat_8/Cat_1	P-value adjusted Cat_10/Cat_1	P-value adjusted Cat_9/Cat_1	P-value adjusted Cat_4/Cat_3	P-value adjusted Cat_5/Cat_3	P-value adjusted Cat_6/Cat_3	P-value adjusted Cat_7/Cat_3	P-value adjusted Cat_8/Cat_3
A0A075B5P3;A0A0A6YVP0;P01867 [Ig gamma-2B chain C region ...]	-1.143747708	-1.238863867	1.048177485	-1.39945102	-2.051314238	-0.72211048	-1.560779698	-0.717974875	-0.095116159	2.191925194	-0.255703312	-0.90756653	0.421637229	-0.417031989	0.425772834	2.287041352	-0.160587153	-0.812450371	0.516753388	-0.32191583	0.520888992	-2.447628506	-3.099491723	-1.770287965	-2.608957183	-1.76615236	-0.651863217	0.677340541	-0.161328677	0.681476146	1.329203758	0.49053454	1.333339363	-0.838669218	0.004135605	0.842804823	0	0	0.019675	0	0	0	0	0	0.501451	0	0.136031	1.10E-05	0.003136
A0A075B5P4;A0A0A6YWR2;P01868;P01869 [Ig gamma-1 chain C region secreted form;Ig gamma-1 ...]	0.70323244	-2.787434724	2.350190164	-2.787434724	-0.401572597	0.070078525	-2.787434724	-2.71799028	-3.490667164	1.646957724	-3.490667164	-1.104805036	-0.633153915	-3.490667164	-3.42122272	5.137624888	0	2.385862128	2.85751325	0	0.069444444	-5.137624888	-2.75176276	-2.280111639	-5.137624888	-5.068180444	2.385862128	2.85751325	0	0.069444444	0.471651122	-2.385862128	-2.316417684	-2.85751325	-2.788068805	0.069444444	0	0	0.000765	0	0	6.00E-06	0	0	0	0	0	0	0.06775
A0A075B5P5;A0A1Y7VJN6;P03987 [Ig gamma-3 chain C region ...]	1.063994892	-1.215725594	-0.573787869	-0.574270873	-0.615557104	-0.391111789	-0.585923128	-0.391210187	-2.279720486	-1.637782762	-1.638265766	-1.679551996	-1.455106681	-1.649918021	-1.455205079	0.641937724	0.64145472	0.60016849	0.824613805	0.629802465	0.824515407	-0.000483004	-0.041769234	0.18267608	-0.012135259	0.182577682	-0.04128623	0.183159085	-0.011652255	0.183060687	0.224445315	0.029633975	0.224346917	-0.19481134	-9.84E-05	0.194712941	5.10E-05	0	0	0	0	0	0	0	0	0	0	0	0
A0A075B5P6;A0A075B6A0;P01872 [Ig mu chain C region ...]	-1.182318687	-0.003414586	0.974474116	-1.165327172	-1.506935808	-0.17773205	-1.016401268	-0.173596445	1.178904101	2.156792803	0.016991515	-0.324617121	1.004586638	0.16591742	1.008722243	0.977888701	-1.161912586	-1.503521222	-0.174317464	-1.012986682	-0.170181859	-2.139801288	-2.481409923	-1.152206165	-1.990875383	-1.14807056	-0.341608635	0.987595123	0.148925905	0.991730728	1.329203758	0.49053454	1.333339363	-0.838669218	0.004135605	0.842804823	0	1.10E-05	1	0	0	5.00E-06	0	4.00E-06	1.70E-05	1.00E-06	1	0.060464	5.90E-05
A0A087WPL5;E9QNN1;O70133;Q3UR42 [ATP-dependent RNA helicase A ...]	0	1.288611906	0	0	0	0.055555556	0	0.069444444	1.288611906	0	0	0	0.055555556	0	0.069444444	-1.288611906	-1.288611906	-1.288611906	-1.233056351	-1.288611906	-1.219167462	0	0	0.055555556	0	0.069444444	0	0.055555556	0	0.069444444	0.055555556	0	0.069444444	-0.055555556	0.013888889	0.069444444	1	1	1	1	1	1	1	1	1	1	1	1	0.999999
A0A087WRJ2;A0A087WPF8;A0A087WSR2;E9QN99;A0A087WP24;Q8VCR7;A0A1L1SRH5;A0A1L1SUX1 [Alpha/beta hydrolase domain-containing protein 14B ...]	-1.66709496	-2.394039917	-1.418596165	-1.494719859	-0.551537443	-0.956127112	1.249544172	-0.967124529	-0.726944957	0.248498795	0.172375101	1.115557517	0.710967848	2.916639132	0.699970431	0.975443752	0.899320058	1.842502474	1.437912805	3.643584089	1.426915388	-0.076123694	0.867058722	0.462469053	2.668140337	0.451471636	0.943182416	0.538592747	2.744264031	0.52759533	-0.404589669	1.801081615	-0.415587086	2.205671284	-0.010997417	-2.216668701	1	0.702875	1	1	0.931263	1	0.256536	1	0.843199	1	1	0.715144	0.948245
A0A087WSQ5;Q99K94;Q8C3V4;A0A087WSP5;P42225 [Signal transducer and activator of transcription;S ...]	-0.024573056	1.272930501	-0.003490218	-0.003823267	-0.023847091	0.140399124	-0.009147249	0.142063095	1.297503557	0.021082837	0.020749789	0.000725964	0.16497218	0.015425807	0.166636151	-1.27642072	-1.276753768	-1.296777593	-1.132531377	-1.28207775	-1.130867406	-0.000333049	-0.020356873	0.143889343	-0.00565703	0.145553314	-0.020023824	0.144222391	-0.005323982	0.145886362	0.164246216	0.014699843	0.165910187	-0.149546373	0.001663971	0.151210344	1	0.37682	1	1	1	1	1	1	0.36756	1	1	1	0.999999
A0A0A0MQA5;P68368;A0A087WQS4;A0A087WRB4;A0A087WSB0;A0A087WSL5 [Tubulin alpha-4A chain ...]	1.192158471	3.262255855	1.350395384	1.770104239	2.246775539	-0.386455983	0.936989641	-0.382320378	2.070097384	0.158236913	0.577945768	1.054617068	-1.578614454	-0.25516883	-1.574478849	-1.911860471	-1.492151615	-1.015480315	-3.648711838	-2.325266213	-3.644576233	0.419708856	0.896380156	-1.736851367	-0.413405742	-1.732715762	0.4766713	-2.156560222	-0.833114598	-2.152424618	-2.633231523	-1.309785898	-2.629095918	1.323445625	0.004135605	-1.31931002	1.00E-06	0	1.00E-06	0	0	0.013457	0.001184	0.012253	1.00E-06	0.541923	0.010673	0.000199	8.00E-06
A0A0A0MQG2;Q62261 [Spectrin beta chain, non-erythrocytic 1 ...]	-0.045591697	0.390553196	-0.009658017	-0.010141021	-0.051427252	0.173018063	-0.021793276	0.172919665	0.436144893	0.035933679	0.035450675	-0.005835555	0.21860976	0.02379842	0.218511362	-0.400211214	-0.400694218	-0.441980448	-0.217535133	-0.412346473	-0.217633531	-0.000483004	-0.041769234	0.18267608	-0.012135259	0.182577682	-0.04128623	0.183159085	-0.011652255	0.183060687	0.224445315	0.029633975	0.224346917	-0.19481134	-9.84E-05	0.194712941	0	0	0.000122	5.40E-05	0	0	4.00E-06	0	0	2.20E-05	2.80E-05	0.297186	0
A0A0A0MQM0;P63242;Q8BGY2;J3QPS8 [Eukaryotic translation initiation factor 5A;Eukary ...]	0.513327295	1.659395952	-0.084525996	-0.16064969	-0.328837147	0.377943056	-0.084525996	0.36694564	1.146068657	-0.597853291	-0.673976985	-0.842164442	-0.135384238	-0.597853291	-0.146381655	-1.743921948	-1.820045642	-1.988233099	-1.281452896	-1.743921948	-1.292450312	-0.076123694	-0.244311151	0.462469053	0	0.451471636	-0.168187457	0.538592747	0.076123694	0.52759533	0.706780204	0.244311151	0.695782787	-0.462469053	-0.010997417	0.451471636	1	0.54005	1	1	1	1	1	1	0.697235	1	1	0.843582	0.999999
A0A0A6YW67;E9Q9J0;E9Q4P0;E9Q5F6;E9QNP0;Q5SX22;P62984;P62983;P0CG49;P0CG50 [Ubiquitin-60S ribosomal protein L40;Ubiquitin;60S ...]	-1.238625986	-0.410212963	-0.63034826	0.608711943	1.071654157	0.314599405	1.238625986	0.113532873	0.828413023	0.608277726	1.847337929	2.310280143	1.553225391	2.477251972	1.352158859	-0.220135297	1.018924906	1.48186712	0.724812368	1.648838949	0.523745836	1.239060203	1.702002417	0.944947665	1.868974246	0.743881133	0.462942214	-0.294112538	0.629914043	-0.49517907	-0.757054752	0.166971829	-0.958121284	0.924026581	-0.201066532	-1.125093113	1	0.000721	0.006913	2.00E-06	0	2.50E-05	0	1.90E-05	0.000809	0.006284	3.00E-06	0	2.30E-05
A0A0A6YW77;P11672 [Neutrophil gelatinase-associated lipocalin ...]	2.08908102	2.675090875	-0.126799934	1.34947345	-0.63460232	0.694601438	-0.14406778	0.698737043	0.586009855	-2.215880954	-0.739607571	-2.72368334	-1.394479582	-2.2331488	-1.390343977	-2.801890808	-1.325617425	-3.309693195	-1.980489437	-2.819158655	-1.976353832	1.476273383	-0.507802387	0.821401372	-0.017267846	0.825536977	-1.98407577	-0.654872012	-1.49354123	-0.650736407	1.329203758	0.49053454	1.333339363	-0.838669218	0.004135605	0.842804823	0	0	0.002239	0.000276	1.00E-06	1.00E-05	0.001086	8.00E-06	0.007631	0	0.007399	0	0
A0A0A6YY34;A0A0A6YVV2;P11352 [Glutathione peroxidase;Glutathione peroxidase 1 ...]	0.877671048	1.170323587	-0.126799934	-0.292993685	-0.63460232	0.694601438	-0.14406778	0.698737043	0.29265254	-1.004470981	-1.170664732	-1.512273368	-0.18306961	-1.021738828	-0.178934005	-1.297123521	-1.463317272	-1.804925907	-0.475722149	-1.314391367	-0.471586544	-0.166193751	-0.507802387	0.821401372	-0.017267846	0.825536977	-0.341608635	0.987595123	0.148925905	0.991730728	1.329203758	0.49053454	1.333339363	-0.838669218	0.004135605	0.842804823	1.00E-06	0	0.000374	7.00E-06	0	1.00E-06	0.000127	1.00E-06	0.000982	0	0	0	0.0192
A0A0G2JEU1;P47738;A0A0G2JF60;A0A0G2JFQ0;D3YYF3;Q62148;G3UWP3;P24549;Q9JHW9;Q9CZS1 [Aldehyde dehydrogenase, mitochondrial ...]	1.917445167	2.81353887	0.244790623	1.526863615	-0.63460232	0.694601438	-0.14406778	0.698737043	0.896093703	-1.672654544	-0.390581552	-2.552047487	-1.222843729	-2.061512947	-1.218708124	-2.568748248	-1.286675255	-3.448141191	-2.118937432	-2.957606651	-2.114801828	1.282072993	-0.879392943	0.449810815	-0.388858403	0.45394642	-2.161465936	-0.832262177	-1.670931395	-0.828126572	1.329203758	0.49053454	1.333339363	-0.838669218	0.004135605	0.842804823	0	0	0.395913	1.00E-06	0	1.00E-06	0.000127	1.00E-06	0	0	0.006119	0	0
A0A0G2JFQ3;D3YZT0;D3Z629;S4R1R7;A0A0G2JES3;A0A140T8T4;P51410 [60S ribosomal protein L9 ...]	0	1.786158544	0	0	0	0.055555556	0	0.069444444	1.786158544	0	0	0	0.055555556	0	0.069444444	-1.786158544	-1.786158544	-1.786158544	-1.730602988	-1.786158544	-1.7167141	0	0	0.055555556	0	0.069444444	0	0.055555556	0	0.069444444	0.055555556	0	0.069444444	-0.055555556	0.013888889	0.069444444	1	1	1	1	1	1	1	1	1	1	1	1	0.999999
A0A0G2JGD2;P07091 [Protein S100-A4 ...]	0	1.301672719	0	0	0	0.055555556	0	0.069444444	1.301672719	0	0	0	0.055555556	0	0.069444444	-1.301672719	-1.301672719	-1.301672719	-1.246117164	-1.301672719	-1.232228275	0	0	0.055555556	0	0.069444444	0	0.055555556	0	0.069444444	0.055555556	0	0.069444444	-0.055555556	0.013888889	0.069444444	1	1	1	1	1	1	1	1	1	1	1	1	0.999999
A0A0G2JGX3;Q9CQQ7 [ATP synthase F(0) complex subunit B1, mitochondria ...]	-0.506935111	0.060588343	-0.485852273	-0.486185322	-0.506209146	-0.341962931	0.473214806	-0.34029896	0.567523454	0.021082837	0.020749789	0.000725964	0.16497218	0.980149917	0.166636151	-0.546440616	-0.546773665	-0.566797489	-0.402551274	0.412626463	-0.400887303	-0.000333049	-0.020356873	0.143889343	0.959067079	0.145553314	-0.020023824	0.144222391	0.959400128	0.145886362	0.164246216	0.979423953	0.165910187	0.815177737	0.001663971	-0.813513766	1	0.790606	1	1	1	1	0.575372	1	0.758151	1	1	1	0.999999
A0A0J9YUE9;Q3T9X3;A0A0J9YUN4;Q3TCR7;G3X9G4;F8WIV5;P39053;P39054;G3UZZ3;D6RH60;G3UY64;G3UXX2;E9QLL2;Q8BZ98 [Dynamin-1;Dynamin-2 ...]	-0.045591697	0.416271234	-0.009658017	-0.010141021	0.489752447	0.173018063	-0.021793276	0.172919665	0.46186293	0.035933679	0.035450675	0.535344144	0.21860976	0.02379842	0.218511362	-0.425929251	-0.426412255	0.073481213	-0.243253171	-0.43806451	-0.243351569	-0.000483004	0.499410464	0.18267608	-0.012135259	0.182577682	0.499893468	0.183159085	-0.011652255	0.183060687	-0.316734384	-0.511545723	-0.316832782	-0.19481134	-9.84E-05	0.194712941	2.00E-06	0	0.001177	0.000808	1.00E-06	0	7.50E-05	0	0	0.000355	0.000398	0	0
A0A0J9YUZ4;P63158;A0A0J9YUD8;D3YVC6;D3YZ18 [High mobility group protein B1 ...]	1.485473909	2.455350862	-0.126799934	-0.292993685	-0.63460232	0.694601438	-0.14406778	0.698737043	0.969876953	-1.612273843	-1.778467594	-2.120076229	-0.790872471	-1.629541689	-0.786736866	-2.582150796	-2.748344547	-3.089953182	-1.760749424	-2.599418642	-1.756613819	-0.166193751	-0.507802387	0.821401372	-0.017267846	0.825536977	-0.341608635	0.987595123	0.148925905	0.991730728	1.329203758	0.49053454	1.333339363	-0.838669218	0.004135605	0.842804823	0	0	0.000374	7.00E-06	0	1.00E-06	0.000127	1.00E-06	2.00E-06	0	0	0	0
A0A0N4SV66;Q8CGP4;C0HKE9;C0HKE8;C0HKE7;C0HKE6;C0HKE5;C0HKE4;C0HKE3;C0HKE2;C0HKE1;Q8CGP6;Q8R1M2;Q8CGP7;Q8CGP5;Q8BFU2;Q64523;Q6GSS7;P27661;Q64522;G3UWL7 [Histone H2A;Histone H2A type 1-H;Histone H2A.J;His ...]	2.834705125	3.701028973	1.799616404	1.799616404	1.771469334	-1.79007027	2.433215257	1.82893311	0.866323849	-1.03508872	-1.03508872	-1.063235791	-4.624775395	-0.401489867	-1.005772015	-1.901412569	-1.901412569	-1.92955964	-5.491099243	-1.267813716	-1.872095864	0	-0.02814707	-3.589686674	0.633598853	0.029316705	-0.02814707	-3.589686674	0.633598853	0.029316705	-3.561539604	0.661745923	0.057463776	4.223285527	3.61900338	-0.604282147	0	0	0	0	0	0.132696	0	0	1.00E-06	0	0	0	0
A0A0N4SVB8;F6QKK2;Q9CQW2;Q8VEH3 [ADP-ribosylation factor-like protein 8B;ADP-ribosy ...]	0.412990529	0.7143552	-0.003490218	-0.003823267	-0.023847091	0.140399124	-0.009147249	0.142063095	0.301364671	-0.416480748	-0.416813796	-0.436837621	-0.272591405	-0.422137778	-0.270927434	-0.717845419	-0.718178468	-0.738202292	-0.573956076	-0.723502449	-0.572292105	-0.000333049	-0.020356873	0.143889343	-0.00565703	0.145553314	-0.020023824	0.144222391	-0.005323982	0.145886362	0.164246216	0.014699843	0.165910187	-0.149546373	0.001663971	0.151210344	0.98637	0.698374	1	1	1	1	1	1	0.948709	0.967881	1	0.899026	0.999999
A0A0N4SW34;A0A0N4SW07;P50518 [V-type proton ATPase subunit E 1 ...]	0	1.636530809	0	0	0	0.055555556	0	0.069444444	1.636530809	0	0	0	0.055555556	0	0.069444444	-1.636530809	-1.636530809	-1.636530809	-1.580975253	-1.636530809	-1.567086364	0	0	0.055555556	0	0.069444444	0	0.055555556	0	0.069444444	0.055555556	0	0.069444444	-0.055555556	0.013888889	0.069444444	1	1	1	1	1	1	1	1	1	1	1	1	0.999999
A0A0R4IZY6;Q61096;F6ZK01 [Myeloblastin ...]	1.210529433	1.918412625	1.53403384	2.557990877	1.002500947	0.694601438	-0.14406778	0.698737043	0.707883193	0.323504408	1.347461444	-0.208028486	-0.515927995	-1.354597213	-0.51179239	-0.384378785	0.639578252	-0.915911678	-1.223811187	-2.062480405	-1.219675582	1.023957037	-0.531532893	-0.839432402	-1.67810162	-0.835296797	-1.55548993	-1.863389439	-2.702058657	-1.859253834	-0.307899509	-1.146568727	-0.303763904	-0.838669218	0.004135605	0.842804823	2.00E-06	0	0	0	1.00E-06	2.80E-05	0.00245	2.30E-05	4.80E-05	0.01022	0	0.078426	0.000514
A0A0R4J039;Q9ESB3;A0A338P6H8 [Histidine-rich glycoprotein ...]	1.121489948	-0.783308714	2.506609654	-0.425372539	1.413480849	0.721105658	-1.494499779	1.971057124	-1.904798662	1.385119706	-1.546862488	0.291990901	-0.40038429	-2.615989727	0.849567176	3.289918368	0.357936174	2.196789563	1.504414372	-0.711191065	2.754365838	-2.931982193	-1.093128805	-1.785503996	-4.001109433	-0.53555253	1.838853389	1.146478197	-1.069127239	2.396429664	-0.692375191	-2.907980628	0.557576275	-2.215605437	1.249951466	3.465556903	0.321291	2.10E-05	0.008734	0.000111	1	0.127745	3.00E-06	0.214703	5.00E-06	6.80E-05	3.20E-05	0.225937	0.399969
A0A0R4J043;P28825 [Meprin A subunit alpha ...]	0.322821493	-2.424075164	0.40509825	1.242142574	-0.683267437	2.751294117	-1.153050987	2.741388249	-2.746896657	0.082276757	0.919321081	-1.00608893	2.428472624	-1.475872479	2.418566756	2.829173414	3.666217739	1.740807727	5.175369281	1.271024178	5.165463414	0.837044324	-1.088365687	2.346195867	-1.558149237	2.336289999	-1.925410011	1.509151543	-2.395193561	1.499245675	3.434561554	-0.46978355	3.424655686	-3.904345103	-0.009905868	3.894439236	0.000169	0	0.00055	0.753383	4.00E-06	3.00E-06	0	1.00E-06	0	0.779271	9.40E-05	0.000501	0
A0A0R4J083;P51174 [Long-chain specific acyl-CoA dehydrogenase, mitoch ...]	0.639433783	-1.362946825	-0.716159553	-0.792283247	-0.960470704	-0.2536905	0.547107561	-0.264687917	-2.002380608	-1.355593336	-1.43171703	-1.599904487	-0.893124283	-0.092326222	-0.9041217	0.646787272	0.570663578	0.402476121	1.109256325	1.910054386	1.098258908	-0.076123694	-0.244311151	0.462469053	1.263267114	0.451471636	-0.168187457	0.538592747	1.339390808	0.52759533	0.706780204	1.507578265	0.695782787	0.800798061	-0.010997417	-0.811795478	0.762336	0.810594	1	1	1	1	0.757377	1	0.406037	0.673042	0.643397	0.532605	0.864879
A0A0R4J093;Q9DBP5 [UMP-CMP kinase ...]	-1.228767554	-0.975872175	-0.959185922	-1.035642664	-1.223853945	-0.408383082	0.777496462	-0.431605417	0.25289538	0.269581633	0.19312489	0.004913609	0.820384473	2.006264016	0.797162138	0.016686253	-0.05977049	-0.247981771	0.567489093	1.753368636	0.544266758	-0.076456743	-0.264668024	0.55080284	1.736682383	0.527580505	-0.188211281	0.627259583	1.813139126	0.604037248	0.815470864	2.001350407	0.792248529	1.185879544	-0.023222335	-1.209101878	0.730067	0.930646	1	1	0.703233	0.889496	0.044512	0.915838	0.847872	0.967881	1	1	0.35521
A0A0R4J0B2;Q8VCI0 [Phospholipase B-like 1;Phospholipase B-like 1 chai ...]	-0.045591697	0.875537409	-0.009658017	-0.010141021	-0.051427252	0.173018063	-0.021793276	0.172919665	0.921129106	0.035933679	0.035450675	-0.005835555	0.21860976	0.02379842	0.218511362	-0.885195426	-0.88567843	-0.926964661	-0.702519346	-0.897330685	-0.702617744	-0.000483004	-0.041769234	0.18267608	-0.012135259	0.182577682	-0.04128623	0.183159085	-0.011652255	0.183060687	0.224445315	0.029633975	0.224346917	-0.19481134	-9.84E-05	0.194712941	2.00E-06	0	0.001177	0.000808	1.00E-06	0	7.50E-05	0	0	0.000355	0.000398	0.503657	0
A0A0R4J0I1;P07759;Q80X76 [Serine protease inhibitor A3K ...]	1.126878818	2.017199351	0.947106862	-1.399434732	-1.693800127	0.043755728	-1.681714813	-0.947216274	0.890320533	-0.179771956	-2.52631355	-2.820678945	-1.08312309	-2.808593631	-2.074095092	-1.070092489	-3.416634083	-3.710999479	-1.973443623	-3.698914165	-2.964415625	-2.346541594	-2.640906989	-0.903351134	-2.628821675	-1.894323136	-0.294365395	1.44319046	-0.282280081	0.452218458	1.737555855	0.012085314	0.746583853	-1.725470541	-0.990972002	0.734498539	0.000469	0.010104	0.001184	0	0	0	0	0	1.30E-05	0.363706	2.00E-06	0	3.00E-06
A0A0R4J0R1;O70404;A0A0U1RPE8 [Vesicle-associated membrane protein 8 ...]	0.515576241	0.148614537	-0.088016215	-0.164472958	-0.352684239	0.462786625	-0.093673245	0.43956429	-0.366961704	-0.603592456	-0.680049199	-0.86826048	-0.052789616	-0.609249487	-0.076011951	-0.236630752	-0.313087495	-0.501298776	0.314172088	-0.242287782	0.290949753	-0.076456743	-0.264668024	0.55080284	-0.00565703	0.527580505	-0.188211281	0.627259583	0.070799713	0.604037248	0.815470864	0.259010994	0.792248529	-0.55645987	-0.023222335	0.533237535	0.795221	1	1	1	0.741576	0.905032	1	0.924998	0.754956	0.59184	0.514002	0.343375	0.999999
A0A0R4J0S8;Q80YF6 [Uroplakin-3b ...]	1.756773879	-0.645796846	-0.006167799	-0.006317754	0.704382287	0.088174495	-0.012646028	0.100301014	-2.402570726	-1.762941678	-1.763091633	-1.052391592	-1.668599385	-1.769419907	-1.656472865	0.639629048	0.639479092	1.350179134	0.733971341	0.633150819	0.746097861	-0.000149955	0.710550086	0.094342293	-0.006478229	0.106468813	0.710700042	0.094492249	-0.006328273	0.106618769	-0.616207793	-0.717028315	-0.604081273	-0.100820522	0.01212652	0.112947042	0.205289	0.705798	1	1	0.741576	1	1	1	0.073124	0.202187	0.203618	0.501616	0.239637
A0A0R4J0X5;A0A0A0MQA3;Q00896;P07758 [Alpha-1-antitrypsin 1-3;Alpha-1-antitrypsin 1-1 ...]	-0.038758851	-0.349541626	1.507922665	-1.265337289	-0.667702694	-0.218920127	-1.767781326	-0.096447581	-0.310782775	1.546681516	-1.226578438	-0.628943844	-0.180161276	-1.729022475	-0.057688731	1.857464291	-0.915795663	-0.318161068	0.130621499	-1.4182397	0.253094045	-2.773259954	-2.175625359	-1.726842792	-3.275703991	-1.604370246	0.597634595	1.046417162	-0.502444037	1.168889708	0.448782567	-1.100078632	0.571255113	-1.548861199	0.122472546	1.671333745	0	0	0.083196	0	0	0	0	0	0.013176	0	1.00E-06	0.000111	0.131612
A0A0R4J1C2;A0A0R4IZW8;O88456;Q9D7J7 [Calpain small subunit 1;Calpain small subunit 2 ...]	-1.325412371	-1.14203931	-0.468874295	0.713588987	0.555198498	-1.160440191	1.291692066	-1.15877622	0.183373061	0.856538076	2.039001357	1.880610869	0.16497218	2.617104437	0.166636151	0.673165015	1.855628297	1.697237808	-0.018400881	2.433731376	-0.01673691	1.182463281	1.024072793	-0.691565896	1.760566361	-0.689901925	-0.158390488	-1.874029177	0.57810308	-1.872365206	-1.715638689	0.736493568	-1.713974718	2.452132257	0.001663971	-2.450468286	1	1	0.757264	0.147219	0.180311	1	0.054975	1	1	0.673042	0.147407	0.178519	0.999999
A0A0R4J2B2;Q6WVG3;Q8C7J6 [BTB/POZ domain-containing protein KCTD12 ...]	0	1.480004317	0	0	0	0.055555556	0	0.069444444	1.480004317	0	0	0	0.055555556	0	0.069444444	-1.480004317	-1.480004317	-1.480004317	-1.424448761	-1.480004317	-1.410559872	0	0	0.055555556	0	0.069444444	0	0.055555556	0	0.069444444	0.055555556	0	0.069444444	-0.055555556	0.013888889	0.069444444	1	1	1	1	1	1	1	1	1	1	1	1	0.999999
A0A0U1RNJ1;P19096 [Fatty acid synthase;[Acyl-carrier-protein] S-acety ...]	-1.2409259	-2.7217278	-0.704342911	-0.870536662	0.339200245	0.117058461	0.433475197	0.121194066	-1.4808019	0.536582989	0.370389238	1.580126145	1.357984361	1.674401097	1.362119966	2.017384889	1.851191138	3.060928045	2.838786261	3.155202997	2.842921866	-0.166193751	1.043543156	0.821401372	1.137818108	0.825536977	1.209736907	0.987595123	1.304011859	0.991730728	-0.222141784	0.094274952	-0.218006179	0.316416736	0.004135605	-0.312281131	0	0	0.000374	7.00E-06	5.00E-05	1.00E-06	0	1.00E-06	0	1.00E-06	2.80E-05	0	0
A0A0U1RNR3;A0A0U1RNK9;A0A0U1RNP5;A0A0N4SVE0;Q9DCW4 [Electron transfer flavoprotein subunit beta ...]	-0.835767606	-0.835767606	-0.835767606	-0.835767606	1.464353654	-0.780212051	0.835767606	-0.766323162	0	0	0	2.30012126	0.055555556	1.671535213	0.069444444	0	0	2.30012126	0.055555556	1.671535213	0.069444444	0	2.30012126	0.055555556	1.671535213	0.069444444	2.30012126	0.055555556	1.671535213	0.069444444	-2.244565705	-0.628586047	-2.230676816	1.615979657	0.013888889	-1.602090768	1	1	1	1	1	1	1	1	1	1	1	1	0.999999
A0A1B0GR11;Q93092 [Transaldolase ...]	1.108650454	1.893672238	-0.460817284	0.460466849	-0.217737924	-0.169174544	0.719708202	-0.165038939	0.785021784	-1.569467738	-0.648183606	-1.326388379	-1.277824998	-0.388942253	-1.273689393	-2.354489522	-1.43320539	-2.111410163	-2.062846782	-1.173964037	-2.058711177	0.921284132	0.243079359	0.29164274	1.180525485	0.295778345	-0.678204773	-0.629641393	0.259241353	-0.625505788	0.048563381	0.937446126	0.052698985	0.888882746	0.004135605	-0.884747141	1.00E-06	0	0.286948	1.10E-05	0.127534	0.00259	6.10E-05	0.002331	0.000655	3.30E-05	0.002608	0.001254	1.70E-05
A0A1B0GR41;A0A1C7CYU3;Q02819 [Nucleobindin-1 ...]	-0.807346636	-0.807346636	-0.807346636	-0.807346636	-0.807346636	-0.75179108	0.807346636	-0.737902192	0	0	0	0	0.055555556	1.614693272	0.069444444	0	0	0	0.055555556	1.614693272	0.069444444	0	0	0.055555556	1.614693272	0.069444444	0	0.055555556	1.614693272	0.069444444	0.055555556	1.614693272	0.069444444	1.559137716	0.013888889	-1.545248828	1	1	1	1	1	1	1	1	1	1	1	1	0.999999
A0A1B0GRR3;P62281;A0A1B0GSE8 [40S ribosomal protein S11 ...]	-0.021018641	0.083191751	-0.006167799	-0.006317754	1.28830239	0.088174495	-0.012646028	0.100301014	0.104210392	0.014850842	0.014700887	1.309321031	0.109193135	0.008372613	0.121319655	-0.08935955	-0.089509505	1.205110639	0.004982744	-0.095837778	0.017109264	-0.000149955	1.294470189	0.094342293	-0.006478229	0.106468813	1.294620144	0.094492249	-0.006328273	0.106618769	-1.200127896	-1.300948418	-1.188001376	-0.100820522	0.01212652	0.112947042	1	1	1	1	0.3798	1	1	1	1	1	1	0.359419	0.999999
A0A1B0GS70;Q9R1P4 [Proteasome subunit alpha type-1 ...]	-0.2498764	-0.279515748	-0.771089098	-0.771572102	-0.812858332	-0.588413018	0.739637805	-0.588511416	-0.029639348	-0.521212698	-0.521695702	-0.562981932	-0.338536617	0.989514205	-0.338635015	-0.49157335	-0.492056354	-0.533342584	-0.30889727	1.019153553	-0.308995668	-0.000483004	-0.041769234	0.18267608	1.510726903	0.182577682	-0.04128623	0.183159085	1.511209907	0.183060687	0.224445315	1.552496137	0.224346917	1.328050822	-9.84E-05	-1.32814922	1.00E-06	0	0.001177	0.000808	1.00E-06	0	0	0	0.601806	1.00E-06	1.00E-06	0	1.30E-05
A0A1B0GSB2;P19253;A0A1B0GQW6;A0A1B0GSL5;A0A1B0GSC2;A0A1B0GRH1;A0A1B0GSF0;A0A1B0GSQ6;A0A1B0GTA1;A0A1B0GS68 [60S ribosomal protein L13a ...]	-0.483937693	0.214727496	-0.469086851	-0.469236807	-0.490499213	-0.374744558	0.450273025	-0.362618038	0.69866519	0.014850842	0.014700887	-0.006561519	0.109193135	0.934210718	0.121319655	-0.683814348	-0.683964303	-0.705226709	-0.589472054	0.235545529	-0.577345535	-0.000149955	-0.021412361	0.094342293	0.919359876	0.106468813	-0.021262406	0.094492249	0.919509832	0.106618769	0.115754655	0.940772238	0.127881175	0.825017583	0.01212652	-0.812891063	1	0.705798	1	1	1	1	0.597165	1	0.695303	1	1	1	0.999999
A0A1B0GSG5;Q91VI7;A0A1B0GRG4 [Ribonuclease inhibitor ...]	-1.040744547	-1.249691637	-0.642405442	-1.705765617	0.255400806	-0.718170494	1.268704152	-0.71403489	-0.20894709	0.398339105	-0.66502107	1.296145353	0.322574053	2.3094487	0.326709658	0.607286195	-0.45607398	1.505092443	0.531521143	2.51839579	0.535656748	-1.063360175	0.897806248	-0.075765052	1.911109595	-0.071629447	1.961166423	0.987595123	2.97446977	0.991730728	-0.9735713	1.013303347	-0.969435695	1.986874647	0.004135605	-1.982739042	0.07051	1	0.000374	0.002433	1.00E-06	0.000525	0	0.000447	0.133438	0.004534	0.000157	4.00E-06	0.014848
A0A1B0GSR9;A0A1B0GSX0;P06151;A0A1B0GSL7;A0A1B0GT41;A0A1B0GQX5;D3YZQ9;A0A1B0GRW9;A0A1B0GS79;A0A1B0GRC1;A0A1B0GRS2;A0A1B0GSR2;D3YVR7;D3YZE4;A0A1B0GRE9;P00342 [L-lactate dehydrogenase A chain;L-lactate dehydrog ...]	-1.397461314	1.717560373	-1.017319092	-0.354328641	0.407522277	-0.606873986	0.923754202	0.335535178	3.115021686	0.380142222	1.043132672	1.80498359	0.790587327	2.321215515	1.732996491	-2.734879465	-2.071889014	-1.310038096	-2.324434359	-0.793806171	-1.382025195	0.662990451	1.424841369	0.410445105	1.941073294	1.352854269	0.761850918	-0.252545345	1.278082843	0.689863819	-1.014396263	0.516231925	-0.071987099	1.530628188	0.942409164	-0.588219024	0.063882	0	1	0.028819	0.000123	0.249078	2.70E-05	0.000208	0	0.233105	0.000873	1.30E-05	0.00542
A0A1D5RLV1;A0A571BEG4;A2A839;A2A838;A2AD32;A2A842;A2A841;P48193 [Protein 4.1 ...]	0	1.421005594	0	0	0	0.055555556	0	0.069444444	1.421005594	0	0	0	0.055555556	0	0.069444444	-1.421005594	-1.421005594	-1.421005594	-1.365450038	-1.421005594	-1.351561149	0	0	0.055555556	0	0.069444444	0	0.055555556	0	0.069444444	0.055555556	0	0.069444444	-0.055555556	0.013888889	0.069444444	1	1	1	1	1	1	1	1	1	1	1	1	0.999999
A0A1L1SQA8;P62852 [40S ribosomal protein S25 ...]	-1.92135212	-1.720130958	-0.964087203	-1.555306579	-0.41732106	-2.401096199	0.582307142	-0.53010733	0.201221162	0.957264917	0.36604554	1.50403106	-0.47974408	2.503659262	1.391244789	0.756043755	0.164824378	1.302809898	-0.680965241	2.3024381	1.190023628	-0.591219377	0.546766143	-1.437008996	1.546394345	0.433979873	1.13798552	-0.84578962	2.137613722	1.025199249	-1.983775139	0.999628202	-0.11278627	2.983403341	1.870988869	-1.112414472	0.000115	0.000309	0.133266	0.001122	0.606293	0.000158	0.001953	1	0.459599	0.001286	0.147658	4.50E-05	0.183334
A0A1L1STC6;Q6ZWR6;A0A1L1SRV6 [Nesprin-1 ...]	0	1.248823729	0	0	1.398407639	0.055555556	0	0.069444444	1.248823729	0	0	1.398407639	0.055555556	0	0.069444444	-1.248823729	-1.248823729	0.14958391	-1.193268174	-1.248823729	-1.179379285	0	1.398407639	0.055555556	0	0.069444444	1.398407639	0.055555556	0	0.069444444	-1.342852084	-1.398407639	-1.328963195	-0.055555556	0.013888889	0.069444444	1	1	1	1	1	1	1	1	1	1	1	1	0.999999
A0A1L1STN8;P37804 [Transgelin ...]	1.860404216	-0.647020608	-0.003490218	-0.003823267	-0.023847091	0.140399124	-0.009147249	0.142063095	-2.507424824	-1.863894434	-1.864227483	-1.884251308	-1.720005092	-1.869551465	-1.718341121	0.643530389	0.643197341	0.623173516	0.787419732	0.637873359	0.789083703	-0.000333049	-0.020356873	0.143889343	-0.00565703	0.145553314	-0.020023824	0.144222391	-0.005323982	0.145886362	0.164246216	0.014699843	0.165910187	-0.149546373	0.001663971	0.151210344	0.177989	0.705798	1	1	1	1	1	1	0.063579	0.176589	0.178239	0.169312	0.22588
A0A1L1SU53;Q9Z0P5;A0A087WRG4;A0A1L1STC8 [Twinfilin-2 ...]	0.111766518	0.870326934	-0.126799934	-0.292993685	-0.63460232	0.694601438	-0.14406778	0.698737043	0.758560417	-0.238566451	-0.404760202	-0.746368838	0.58283492	-0.255834298	0.586970525	-0.997126868	-1.163320619	-1.504929254	-0.175725496	-1.014394714	-0.171589891	-0.166193751	-0.507802387	0.821401372	-0.017267846	0.825536977	-0.341608635	0.987595123	0.148925905	0.991730728	1.329203758	0.49053454	1.333339363	-0.838669218	0.004135605	0.842804823	0.663723	0	0.000164	2.00E-06	0	1.00E-06	5.00E-05	0	0	0.000355	8.00E-06	0	0
A0A1L1SUU4;Q9ERN0 [Secretory carrier-associated membrane protein 2 ...]	2.265826851	0	0	0	0	0.055555556	0	0.069444444	-2.265826851	-2.265826851	-2.265826851	-2.265826851	-2.210271296	-2.265826851	-2.196382407	0	0	0	0.055555556	0	0.069444444	0	0	0.055555556	0	0.069444444	0	0.055555556	0	0.069444444	0.055555556	0	0.069444444	-0.055555556	0.013888889	0.069444444	1	1	1	1	1	1	1	1	1	1	1	1	0.999999
A0A1L1SV25;P57780;E9Q2W9;D3Z761;D3Z0L8;A0A1L1SVJ6;Q91ZE6;E9PX29 [Alpha-actinin-4 ...]	-0.725259073	1.299048681	-0.394620537	-0.560814288	-0.573618159	0.426780834	0.123752824	0.430916439	2.024307755	0.330638536	0.164444785	0.151640915	1.152039908	0.849011897	1.156175513	-1.693669219	-1.85986297	-1.87266684	-0.872267847	-1.175295858	-0.868132242	-0.166193751	-0.178997622	0.821401372	0.518373361	0.825536977	-0.01280387	0.987595123	0.684567112	0.991730728	1.000398993	0.697370982	1.004534598	-0.303028011	0.004135605	0.307163616	0.000703	4.00E-06	0.036991	0.002433	0.011937	0.000525	0.20125	0.000447	1.00E-06	0.025177	0.270531	0.464673	5.00E-06
A0A1W2P6F6;A0A1W2P7Q9;Q60605;A0A1W2P6G5 [Myosin light polypeptide 6 ...]	2.32999227	2.085768417	-0.613315095	-0.613798099	0.008454421	-0.430639014	-0.625450354	-0.430737412	-0.244223854	-2.943307365	-2.943790369	-2.321537849	-2.760631285	-2.955442624	-2.760729683	-2.699083511	-2.699566516	-2.077313996	-2.516407431	-2.711218771	-2.516505829	-0.000483004	0.621769516	0.18267608	-0.012135259	0.182577682	0.62225252	0.183159085	-0.011652255	0.183060687	-0.439093435	-0.633904775	-0.439191833	-0.19481134	-9.84E-05	0.194712941	0	0	0	0	2.40E-05	0	0	0	0.002481	0	0	0	0
A0A1W2P720;A0A1W2P869;A0A1W2P6N3;Q99JZ4;Q9CQC9;P36536 [GTP-binding protein SAR1b;GTP-binding protein SAR1 ...]	-0.829076512	0.32152556	-0.829076512	-0.829076512	0.421787182	-0.773520957	0.829076512	-0.759632068	1.150602073	0	0	1.250863694	0.055555556	1.658153024	0.069444444	-1.150602073	-1.150602073	0.100261621	-1.095046517	0.507550952	-1.081157628	0	1.250863694	0.055555556	1.658153024	0.069444444	1.250863694	0.055555556	1.658153024	0.069444444	-1.195308138	0.407289331	-1.181419249	1.602597469	0.013888889	-1.58870858	1	0.000116	1	1	8.80E-05	0.643403	3.30E-05	0.481152	0.000136	1	1	9.80E-05	0.587105
A0A1W2P768;P84228;P68433;F8WI35;P84244;P02301;E0CZ27;E0CYN1;E0CYR7 [Histone H3.2;Histone H3.1;Histone H3;Histone H3.3; ...]	1.3690334	2.680295303	0.69183212	0.752457742	0.691547742	-4.885674012	1.183948759	0.268631822	1.311261903	-0.67720128	-0.616575659	-0.677485659	-6.254707413	-0.185084641	-1.100401578	-1.988463183	-1.927837561	-1.988747561	-7.565969315	-1.496346544	-2.411663481	0.060625621	-0.000284379	-5.577506133	0.492116639	-0.423200298	-0.06091	-5.638131754	0.431491018	-0.483825919	-5.577221754	0.492401018	-0.422915919	6.069622772	5.154305835	-0.915316937	0	0	5.00E-06	2.00E-06	1.00E-06	0	0	1.20E-05	3.00E-05	0.003553	0.00658	0.003374	0
A0A1W2P7X3;Q561M1;Q9D358 [Low molecular weight phosphotyrosine protein phosp ...]	0	1.501468667	0	1.378394133	1.206989776	0.055555556	0	0.069444444	1.501468667	0	1.378394133	1.206989776	0.055555556	0	0.069444444	-1.501468667	-0.123074534	-0.29447889	-1.445913111	-1.501468667	-1.432024222	1.378394133	1.206989776	0.055555556	0	0.069444444	-0.171404356	-1.322838577	-1.378394133	-1.308949688	-1.151434221	-1.206989776	-1.137545332	-0.055555556	0.013888889	0.069444444	1	0	1	7.50E-05	0.000102	0.643403	1	0.481152	0	1	8.70E-05	0.000112	0.587105
A0A1W2P7Z3;P61089 [Ubiquitin-conjugating enzyme E2 N ...]	2.648245066	0.733795003	0	3.444674455	1.420803219	0.055555556	0	0.069444444	-1.914450064	-2.648245066	0.796429389	-1.227441847	-2.592689511	-2.648245066	-2.578800622	-0.733795003	2.710879452	0.687008216	-0.678239447	-0.733795003	-0.664350558	3.444674455	1.420803219	0.055555556	0	0.069444444	-2.023871236	-3.389118899	-3.444674455	-3.37523001	-1.365247663	-1.420803219	-1.351358775	-0.055555556	0.013888889	0.069444444	0	0.00145	1	0	0.000114	0.771186	1	0.616976	1.00E-06	0	8.00E-06	0.000374	0
A0A1Y7VLY5;A0A1Y7VKA0;A0A1Y7VKC6;Q9DB29 [Isoamyl acetate-hydrolyzing esterase 1 homolog ...]	-0.865381509	-1.487829061	-0.844298672	-0.844631721	1.383834633	-0.700409329	0.831661205	-0.698745358	-0.622447552	0.021082837	0.020749789	2.249216143	0.16497218	1.697042714	0.166636151	0.643530389	0.643197341	2.871663695	0.787419732	2.319490266	0.789083703	-0.000333049	2.228133305	0.143889343	1.675959877	0.145553314	2.228466354	0.144222391	1.676292926	0.145886362	-2.084243963	-0.552173428	-2.082579992	1.532070534	0.001663971	-1.530406563	1	0.705798	1	1	0.098883	1	0.209811	1	0.719489	1	1	0.097828	0.999999
A0A286YCZ3;E9Q390;A0A286YDF5;Q69ZN7;A0A286YE65 [Myoferlin ...]	-1.973221541	-2.914900898	-1.436638552	-1.602832303	-1.944440938	-0.61523718	1.165770838	-0.611101575	-0.941679357	0.536582989	0.370389238	0.028780603	1.357984361	3.138992379	1.362119966	1.478262346	1.312068595	0.97045996	2.299663718	4.080671737	2.303799323	-0.166193751	-0.507802387	0.821401372	2.60240939	0.825536977	-0.341608635	0.987595123	2.768603141	0.991730728	1.329203758	3.110211777	1.333339363	1.781008018	0.004135605	-1.776872414	0	0	0.000374	7.00E-06	0	1.00E-06	0	1.00E-06	8.00E-06	1.00E-06	2.80E-05	0.70391	0
A0A286YDW8;Q99JI4 [26S proteasome non-ATPase regulatory subunit 6 ...]	-0.045591697	0.751156187	-0.009658017	-0.010141021	-0.051427252	0.173018063	-0.021793276	0.172919665	0.796747883	0.035933679	0.035450675	-0.005835555	0.21860976	0.02379842	0.218511362	-0.760814204	-0.761297208	-0.802583438	-0.578138123	-0.772949463	-0.578236521	-0.000483004	-0.041769234	0.18267608	-0.012135259	0.182577682	-0.04128623	0.183159085	-0.011652255	0.183060687	0.224445315	0.029633975	0.224346917	-0.19481134	-9.84E-05	0.194712941	2.00E-06	0	0.001177	0.000808	1.00E-06	0	7.50E-05	0	0	0.000355	0.000398	0.503657	0
A0A2C9F2D2;Q07076;A0A286YCW4 [Annexin A7 ...]	-1.512663701	-1.203840531	-0.976080712	-0.205627015	-0.525991777	-0.15467934	0.705212998	-0.150543736	0.308823171	0.536582989	1.307036686	0.986671924	1.357984361	2.2178767	1.362119966	0.227759819	0.998213515	0.677848754	1.04916119	1.909053529	1.053296795	0.770453697	0.450088935	0.821401372	1.68129371	0.825536977	-0.320364762	0.050947675	0.910840014	0.05508328	0.371312437	1.231204775	0.375448041	0.859892339	0.004135605	-0.855756734	1.00E-06	1.70E-05	0.002239	2.60E-05	0.019913	1.00E-05	2.00E-06	8.00E-06	0.000777	1.50E-05	0	0	0
A0A2I3BPH9;A0A2I3BRN5;Q921M7 [Protein FAM49B ...]	1.311872707	0.574997284	0	0	0	0.055555556	0	0.069444444	-0.736875423	-1.311872707	-1.311872707	-1.311872707	-1.256317152	-1.311872707	-1.242428263	-0.574997284	-0.574997284	-0.574997284	-0.519441728	-0.574997284	-0.50555284	0	0	0.055555556	0	0.069444444	0	0.055555556	0	0.069444444	0.055555556	0	0.069444444	-0.055555556	0.013888889	0.069444444	1	1	1	1	1	1	1	1	1	1	1	1	0.999999
A0A2K6EDJ7;E9Q5L2;E9PVD2;A6X935;CON__Q3T052 [Inter alpha-trypsin inhibitor, heavy chain 4 ...]	0.950168096	-0.3688965	1.981439369	0.76411913	-0.729113226	2.924844969	-1.879523581	1.968929387	-1.319064596	1.031271273	-0.186048966	-1.679281322	1.974676873	-2.829691677	1.018761291	2.350335869	1.13301563	-0.360216727	3.293741468	-1.510627082	2.337825886	-1.217320239	-2.710552596	0.9434056	-3.860962951	-0.012509983	-1.493232357	2.160725838	-2.643642712	1.204810256	3.653958195	-1.150410355	2.698042613	-4.80436855	-0.955915582	3.848452968	0.017316	3.80E-05	1	0.006276	1.30E-05	0.013739	1.00E-06	1	0.002198	0.010014	0.785234	0.000415	0.000222
A0A2R8VHF9;E9QPE7;A0A338P6K2;O08638 [Myosin-11 ...]	0.156213155	0.438264754	-0.616273844	-0.691081073	-0.022850083	-0.217192392	0.093965801	-0.213056787	0.282051599	-0.772486999	-0.847294229	-0.179063239	-0.373405547	-0.062247354	-0.369269942	-1.054538598	-1.129345828	-0.461114837	-0.655457146	-0.344298953	-0.651321541	-0.07480723	0.593423761	0.399081452	0.710239645	0.403217057	0.66823099	0.473888682	0.785046875	0.478024287	-0.194342308	0.116815884	-0.190206704	0.311158193	0.004135605	-0.307022588	0.538091	0.061884	0.122467	0.075144	1	0.905032	0.594531	0.924998	0.253432	0.011591	0.007975	0.513602	0.129058
A0A2R8VHP3;Q6IFZ8;D3Z6R0 [ ...]	0.744546862	-1.682801243	2.04100533	2.287245854	0.00872786	3.16652417	-2.041774735	3.232395928	-2.427348105	1.296458469	1.542698993	-0.735819002	2.421977308	-2.786321597	2.487849066	3.723806573	3.970047097	1.691529102	4.849325413	-0.358973492	4.91519717	0.246240524	-2.032277471	1.12551884	-4.082780066	1.191390597	-2.278517995	0.879278316	-4.32902059	0.945150073	3.15779631	-2.050502595	3.223668068	-5.208298905	0.065871758	5.274170663	0.16205	5.00E-05	1	0.935804	0.006688	0.083247	3.20E-05	0.065157	0.012075	0.164338	0.097245	0.503657	0.012861
A0A338P684;P48758 [Carbonyl reductase [NADPH] 1 ...]	-1.438539217	-2.787931726	-1.168957584	-1.245414327	0.103482464	-0.618154744	0.987268124	-0.641377079	-1.349392509	0.269581633	0.19312489	1.542021681	0.820384473	2.425807341	0.797162138	1.618974142	1.542517399	2.89141419	2.169776981	3.77519985	2.146554647	-0.076456743	1.272440048	0.55080284	2.156225708	0.527580505	1.348896791	0.627259583	2.232682451	0.604037248	-0.721637208	0.88378566	-0.744859543	1.605422868	-0.023222335	-1.628645203	0.731962	0.024477	1	1	0.168332	0.889509	0.015283	0.916906	0.086938	0.967881	1	0.054353	0.357379
A0A338P742;A0A338P6Y7;Q9D7G4 [Protein EURL homolog ...]	0.277049269	0	0	0	0	0.055555556	0	0.069444444	-0.277049269	-0.277049269	-0.277049269	-0.277049269	-0.221493713	-0.277049269	-0.207604824	0	0	0	0.055555556	0	0.069444444	0	0	0.055555556	0	0.069444444	0	0.055555556	0	0.069444444	0.055555556	0	0.069444444	-0.055555556	0.013888889	0.069444444	1	1	1	1	1	1	1	1	1	1	1	1	0.999999
A0A338P7C0;O09061 [Proteasome subunit beta type-1 ...]	-0.045591697	0.504722212	-0.009658017	0.628170573	1.915901241	0.173018063	-0.021793276	0.172919665	0.550313909	0.035933679	0.67376227	1.961492938	0.21860976	0.02379842	0.218511362	-0.514380229	0.123448361	1.411179029	-0.331704149	-0.526515488	-0.331802547	0.637828591	1.925559259	0.18267608	-0.012135259	0.182577682	1.287730668	-0.45515251	-0.64996385	-0.455250908	-1.742883178	-1.937694518	-1.742981576	-0.19481134	-9.84E-05	0.194712941	3.00E-06	0	0.001496	0	0	0	0.000102	0	0	0.000474	0	0	0
A0A3B2WCD8;Q3U0V1;A0A3B2W465 [Far upstream element-binding protein 2 ...]	-0.021018641	0.892101485	-0.006167799	-0.006317754	0.440494829	0.088174495	-0.012646028	0.100301014	0.913120125	0.014850842	0.014700887	0.46151347	0.109193135	0.008372613	0.121319655	-0.898269284	-0.898419239	-0.451606656	-0.80392699	-0.904747512	-0.79180047	-0.000149955	0.446662628	0.094342293	-0.006478229	0.106468813	0.446812583	0.094492249	-0.006328273	0.106618769	-0.352320335	-0.453140857	-0.340193815	-0.100820522	0.01212652	0.112947042	1	0.581092	1	1	0.928474	1	1	1	0.560986	1	1	0.880441	0.999999
A0A3Q4EH04;A0A3Q4L335;A0A3Q4L393;Q8BL97 [Serine/arginine-rich splicing factor 7 ...]	0.28981722	0.364750837	-0.009658017	1.284821791	-0.051427252	0.173018063	-0.021793276	0.172919665	0.074933617	-0.299475237	0.995004571	-0.341244472	-0.116799157	-0.311610496	-0.116897555	-0.374408854	0.920070954	-0.416178089	-0.191732774	-0.386544114	-0.191831172	1.294479808	-0.041769234	0.18267608	-0.012135259	0.182577682	-1.336249043	-1.111803728	-1.306615067	-1.111902126	0.224445315	0.029633975	0.224346917	-0.19481134	-9.84E-05	0.194712941	2.50E-05	0	0.004063	0	6.00E-06	0	0.000336	0	0.077247	1.30E-05	0	3.00E-06	0.008261
A0A494B9W3;Q8K1B8;A0A494BBJ8;A0A494B9F7 [Fermitin family homolog 3 ...]	-0.020126379	0.464647439	-0.048441736	1.159464385	-0.333345333	0.404832876	-0.072187811	0.432092418	0.484773818	-0.028315357	1.179590764	-0.313218954	0.424959255	-0.052061432	0.452218797	-0.513089175	0.694816946	-0.797992772	-0.059814563	-0.53683525	-0.032555021	1.207906121	-0.284903597	0.453274612	-0.023746075	0.480534154	-1.492809718	-0.754631509	-1.231652196	-0.727371967	0.738178209	0.261157522	0.765437751	-0.477020687	0.027259542	0.504280229	1	0.771556	1	0.272633	0.817726	0.959886	1	0.924998	0.698722	1	0.228644	0.893338	0.816234
A0A494B9Z0;A0A494BBA8;Q642K5;P62862 [40S ribosomal protein S30 ...]	-0.506167135	-0.905567865	-1.608490218	1.190682003	-1.608490218	-1.552934663	1.608490218	-1.539045774	-0.39940073	-1.102323084	1.696849138	-1.102323084	-1.046767528	2.114657353	-1.032878639	-0.702922354	2.096249868	-0.702922354	-0.647366798	2.514058083	-0.633477909	2.799172221	0	0.055555556	3.216980437	0.069444444	-2.799172221	-2.743616666	0.417808216	-2.729727777	0.055555556	3.216980437	0.069444444	3.161424881	0.013888889	-3.147535992	0.000173	0.000839	1	0	1	0.643403	0	0.481152	0.130678	0.000196	9.00E-06	0.000163	0.000253
A0A494BA30;Q8BMJ2 [Leucine--tRNA ligase, cytoplasmic ...]	-2.60448518	-2.60448518	-2.60448518	-2.60448518	-2.60448518	-2.548929624	-2.60448518	-2.535040735	0	0	0	0	0.055555556	0	0.069444444	0	0	0	0.055555556	0	0.069444444	0	0	0.055555556	0	0.069444444	0	0.055555556	0	0.069444444	0.055555556	0	0.069444444	-0.055555556	0.013888889	0.069444444	1	1	1	1	1	1	1	1	1	1	1	1	0.999999
A0A494BA97;Q62422;A0A494B943 [Osteoclast-stimulating factor 1 ...]	2.510104048	1.978023668	-0.006167799	-0.006317754	-0.02758016	0.088174495	-0.012646028	0.100301014	-0.53208038	-2.516271847	-2.516421802	-2.537684208	-2.421929553	-2.522750075	-2.409803033	-1.984191467	-1.984341422	-2.005603828	-1.889849173	-1.990669695	-1.877722654	-0.000149955	-0.021412361	0.094342293	-0.006478229	0.106468813	-0.021262406	0.094492249	-0.006328273	0.106618769	0.115754655	0.014934133	0.127881175	-0.100820522	0.01212652	0.112947042	0.06485	0.136648	1	1	1	1	1	1	0.778524	0.063022	0.06625	0.061459	0.076028
A0A494BBB0;O35350 [Calpain-1 catalytic subunit ...]	-1.6005355	-0.660742202	-1.063952511	-0.799692262	0.475837441	-0.242551139	0.793084797	-0.238415535	0.939793298	0.536582989	0.800843239	2.076372941	1.357984361	2.393620298	1.362119966	-0.403210309	-0.138950059	1.136579643	0.418191063	1.453827	0.422326668	0.26426025	1.539789952	0.821401372	1.857037309	0.825536977	1.275529702	0.557141122	1.592777059	0.561276727	-0.71838858	0.317247357	-0.714252975	1.035635937	0.004135605	-1.031500332	1.00E-06	0.071797	0.002239	1	0	1.00E-05	0	8.00E-06	0	1.50E-05	8.70E-05	0	0
A0A494BBE3;G3X8R0;Q60870 [Receptor expression-enhancing protein;Receptor exp ...]	-0.838294595	-0.838294595	-0.838294595	-0.838294595	0.701293801	-0.782739039	0.838294595	-0.76885015	0	0	0	1.539588396	0.055555556	1.67658919	0.069444444	0	0	1.539588396	0.055555556	1.67658919	0.069444444	0	1.539588396	0.055555556	1.67658919	0.069444444	1.539588396	0.055555556	1.67658919	0.069444444	-1.48403284	0.137000794	-1.470143951	1.621033634	0.013888889	-1.607144745	1	1	1	1	1	1	1	1	1	1	1	1	0.999999
A0A571BEL9;P80317;Q61390 [T-complex protein 1 subunit zeta ...]	0.856192673	-0.157666281	-0.126799934	0.14406778	0.047291578	0.694601438	-0.14406778	0.698737043	-1.013858954	-0.982992607	-0.712124893	-0.808901096	-0.161591235	-1.000260453	-0.15745563	0.030866347	0.301734061	0.204957858	0.852267719	0.0135985	0.856403323	0.270867714	0.174091511	0.821401372	-0.017267846	0.825536977	-0.096776202	0.550533658	-0.28813556	0.554669263	0.64730986	-0.191359358	0.651445465	-0.838669218	0.004135605	0.842804823	0.006777	0.001605	0.002239	1	0.678588	1.00E-05	0.001086	8.00E-06	0.000726	0.00089	0.007267	0.007888	0.603398
A1BN54;Q7TPR4 [Alpha-actinin-1 ...]	0.647412669	2.11604203	-0.126799934	-0.292993685	-0.63460232	0.694601438	-0.14406778	0.698737043	1.468629361	-0.774212602	-0.940406353	-1.282014989	0.04718877	-0.791480449	0.051324374	-2.242841963	-2.409035714	-2.75064435	-1.421440592	-2.26010981	-1.417304987	-0.166193751	-0.507802387	0.821401372	-0.017267846	0.825536977	-0.341608635	0.987595123	0.148925905	0.991730728	1.329203758	0.49053454	1.333339363	-0.838669218	0.004135605	0.842804823	2.80E-05	0	0.000374	7.00E-06	0	1.00E-06	0.000127	1.00E-06	0	1.00E-06	0	0	0.674294
A2A513;CON__P02535-1;P02535 [Keratin, type I cytoskeletal 10 ...]	0.812957682	-2.745019422	-2.1152016	1.677951387	-1.090892439	1.175270019	-0.382647437	1.032526991	-3.557977104	-2.928159283	0.864993704	-1.903850122	0.362312337	-1.195605119	0.219569308	0.629817822	4.422970809	1.654126983	3.920289441	2.362371985	3.777546413	3.793152987	1.024309161	3.29047162	1.732554164	3.147728591	-2.768843826	-0.502681367	-2.060598824	-0.645424396	2.266162459	0.708245002	2.12341943	-1.557917456	-0.142743029	1.415174428	0.241899	2.00E-06	8.70E-05	0.001838	0.000681	0.030381	0.030155	0.069332	1.00E-06	1.30E-05	0.020487	0.000112	0.364122
A2A817;A2A816;A2A815;A2A813;Q99LX0 [Protein deglycase DJ-1 ...]	-0.721459571	-0.661175553	-0.700376734	1.383006979	-0.720733607	-0.556487391	0.687739267	-0.55482342	0.060284018	0.021082837	2.10446655	0.000725964	0.16497218	1.409198838	0.166636151	-0.039201181	2.044182532	-0.059558054	0.104688162	1.348914819	0.106352133	2.083383713	-0.020356873	0.143889343	1.388116	0.145553314	-2.103740586	-1.93949437	-0.695267712	-1.937830399	0.164246216	1.408472873	0.165910187	1.244226658	0.001663971	-1.242562687	1	1	1	0.126939	1	1	0.381498	1	1	1	0.127027	1	0.999999
A2AB60;A0A1W2P6X3;Q9JL26 [Formin-like protein 1 ...]	-0.024573056	0.690118076	-0.003490218	-0.003823267	-0.023847091	0.140399124	-0.009147249	0.142063095	0.714691132	0.021082837	0.020749789	0.000725964	0.16497218	0.015425807	0.166636151	-0.693608295	-0.693941344	-0.713965168	-0.549718952	-0.699265325	-0.548054981	-0.000333049	-0.020356873	0.143889343	-0.00565703	0.145553314	-0.020023824	0.144222391	-0.005323982	0.145886362	0.164246216	0.014699843	0.165910187	-0.149546373	0.001663971	0.151210344	1	0.705798	1	1	1	1	1	1	0.687783	1	1	1	0.999999
A2AE89;P10649;F6WHQ7;P19639;D3YVP6;E9QAC8;D3YVP5;Q80W21;F6Y363;D3YZ29;D3YVP8;G5E8M7;O35660;D3YVP9;E9PV63;E9PVM7;P48774 [Glutathione S-transferase Mu 1 ...]	-2.846866742	-3.823489868	-1.078082669	-1.614733153	1.075173937	-1.134590861	1.894275732	-0.027025669	-0.976623126	1.768784073	1.232133589	3.922040679	1.712275881	4.741142474	2.819841073	2.745407199	2.208756714	4.898663805	2.688899007	5.7177656	3.796464199	-0.536650485	2.153256606	-0.056508192	2.972358401	1.051057	2.689907091	0.480142293	3.509008886	1.587707484	-2.209764798	0.819101795	-1.102199606	3.028866593	1.107565192	-1.921301401	4.90E-05	1.00E-06	0.000296	0.077082	0	0.00029	0	0	0.000191	1.00E-06	9.00E-06	0	0
A2AE91;Q8R5I6 [ ...]	-3.192702865	-5.542456992	-0.848263614	-2.02834539	0.694118953	-0.943660452	1.896419857	-0.042790335	-2.349754127	2.344439251	1.164357475	3.886821818	2.249042412	5.089122722	3.14991253	4.694193378	3.514111602	6.236575945	4.598796539	7.438876848	5.499666657	-1.180081776	1.542382567	-0.095396839	2.74468347	0.805473279	2.722464343	1.084684937	3.924765247	1.985555055	-1.637779406	1.202300903	-0.736909288	2.840080309	0.900870118	-1.939210192	4.00E-06	0	5.30E-05	0.473277	0	0.000125	0	0	0	0	1.40E-05	0	0
A2AH25;Q5FWK3 [Rho GTPase-activating protein 1 ...]	-0.358381097	-0.421077759	-0.260303175	-0.350523187	0.237439315	0.192971438	0.139673627	0.220230979	-0.062696661	0.098077923	0.00785791	0.595820412	0.551352535	0.498054724	0.578612077	0.160774584	0.070554571	0.658517073	0.614049196	0.560751386	0.641308738	-0.090220012	0.49774249	0.453274612	0.399976802	0.480534154	0.587962502	0.543494625	0.490196814	0.570754166	-0.044467877	-0.097765688	-0.017208336	-0.053297811	0.027259542	0.080557352	1	0.881361	1	1	0.849861	0.959886	0.986271	0.924998	1	1	1	0.611889	0.68635
A2AKN8;E9PVW0;B8JI96;A2BIN0;P11591 [ ...]	2.27705365	-5.016844289	1.341990468	1.298286115	1.175122366	1.459205021	-1.317163693	1.622300762	-7.293897939	-0.935063182	-0.978767535	-1.101931285	-0.817848629	-3.594217344	-0.654752888	6.358834757	6.315130404	6.191966655	6.47604931	3.699680596	6.639145051	-0.043704352	-0.166868102	0.117214553	-2.659154161	0.280310294	-0.12316375	0.160918906	-2.615449809	0.324014647	0.284082656	-2.492286059	0.447178397	-2.776368715	0.163095741	2.939464456	0.000297	0	1	1	0.484415	0.547549	0	0.088485	0	0.000378	0.000305	0.000102	0.000918
A2AKV1;A2AKV2;A2AKV3;Q8C2Q8;A2AKU9;Q91VR2;A2AKV0 [ATP synthase subunit gamma;ATP synthase subunit ga ...]	-1.079854882	-0.488259392	-0.776919846	-0.867139859	-1.061823443	-0.323645234	0.656290299	-0.296385692	0.59159549	0.302935036	0.212715024	0.018031439	0.756209648	1.736145181	0.78346919	-0.288660454	-0.378880467	-0.573564051	0.164614158	1.144549691	0.191873699	-0.090220012	-0.284903597	0.453274612	1.433210145	0.480534154	-0.194683585	0.543494625	1.523430158	0.570754166	0.738178209	1.718113742	0.765437751	0.979935533	0.027259542	-0.952675991	0.751022	0.967315	1	1	0.741576	0.905032	0.080903	0.889912	0.497704	0.918723	1	1	0.388671
A2AL12;Q8BG05 [Heterogeneous nuclear ribonucleoprotein A3 ...]	1.328532445	1.26784776	0	0	0	0.055555556	0	0.069444444	-0.060684685	-1.328532445	-1.328532445	-1.328532445	-1.27297689	-1.328532445	-1.259088001	-1.26784776	-1.26784776	-1.26784776	-1.212292205	-1.26784776	-1.198403316	0	0	0.055555556	0	0.069444444	0	0.055555556	0	0.069444444	0.055555556	0	0.069444444	-0.055555556	0.013888889	0.069444444	1	1	1	1	1	1	1	1	1	1	1	1	0.999999
A2BIN1;Q4FZE8;A2AKN9;A2BIM8;P02762;P04938;A9C497;A9C496 [Major urinary protein 6;Major urinary proteins 11 ...]	2.688561022	-4.475381401	0.846719018	0.803014665	0.679850916	0.963933571	-1.127029312	1.127029312	-7.163942423	-1.841842004	-1.885546357	-2.008710106	-1.724627451	-3.815590334	-1.56153171	5.322100419	5.278396067	5.155232317	5.439314973	3.348352089	5.602410714	-0.043704352	-0.166868102	0.117214553	-1.97374833	0.280310294	-0.12316375	0.160918906	-1.930043978	0.324014647	0.284082656	-1.806880228	0.447178397	-2.090962884	0.163095741	2.254058625	0	0	0.001874	0.001268	3.70E-05	0.030503	0	1	0	0	0	0	0
A2CEK3;Q9D0F9 [Phosphoglucomutase-1 ...]	-0.021018641	-0.157030761	2.275594922	0.697055237	1.288290397	0.088174495	-0.012646028	0.100301014	-0.13601212	2.296613563	0.718073878	1.309309037	0.109193135	0.008372613	0.121319655	2.432625683	0.854085998	1.445321157	0.245205255	0.144384733	0.257331775	-1.578539685	-0.987304525	-2.187420427	-2.28824095	-2.175293908	0.591235159	-0.608880743	-0.709701265	-0.596754223	-1.200115902	-1.300936424	-1.187989382	-0.100820522	0.01212652	0.112947042	1	1	0.109397	0.807775	0.449003	1	1	1	1	0.097919	0.765882	0.433434	0.999999
A2CEK6;B5X0G2;L7N222 [Major urinary protein 17 ...]	2.118238194	-4.595833249	1.396671517	0.585221143	0.647780318	1.203684764	-1.597530164	0.779827687	-6.714071443	-0.721566677	-1.533017051	-1.470457876	-0.91455343	-3.715768359	-1.338410507	5.992504766	5.181054392	5.243613567	5.799518013	2.998303084	5.375660936	-0.811450374	-0.748891199	-0.192986753	-2.994201682	-0.61684383	0.062559175	0.618463621	-2.182751308	0.194606544	0.555904446	-2.245310483	0.132047369	-2.801214929	-0.423857077	2.377357852	0.042022	0	0.546899	0.001024	0.001357	0.128632	0	0.003813	0	0.008479	6.00E-05	6.20E-05	0.001952
A2CEK7 [ ...]	2.522955331	-5.016844289	1.341990468	1.298286115	1.175122366	1.459205021	-1.317163693	1.622300762	-7.53979962	-1.180964863	-1.224669215	-1.347832965	-1.063750309	-3.840119024	-0.900654568	6.358834757	6.315130404	6.191966655	6.47604931	3.699680596	6.639145051	-0.043704352	-0.166868102	0.117214553	-2.659154161	0.280310294	-0.12316375	0.160918906	-2.615449809	0.324014647	0.284082656	-2.492286059	0.447178397	-2.776368715	0.163095741	2.939464456	6.00E-06	0	1	1	0.397412	0.441239	0	0.050388	0	9.00E-06	8.00E-06	2.00E-06	1.70E-05
A3KGU5;A3KGU7;E9Q447;A3KGU9;P16546 [Spectrin alpha chain, non-erythrocytic 1 ...]	-0.351376772	-0.028645985	-0.048441736	-0.138661749	-0.333345333	0.404832876	-0.072187811	0.432092418	0.322730787	0.302935036	0.212715024	0.018031439	0.756209648	0.279188961	0.78346919	-0.019795751	-0.110015764	-0.304699348	0.433478861	-0.043541826	0.460738403	-0.090220012	-0.284903597	0.453274612	-0.023746075	0.480534154	-0.194683585	0.543494625	0.066473937	0.570754166	0.738178209	0.261157522	0.765437751	-0.477020687	0.027259542	0.504280229	0.822881	1	1	1	0.812217	0.959886	1	0.924998	0.823899	0.967881	1	1	0.498448
A3KMP2 [Tetratricopeptide repeat protein 38 ...]	-1.521014247	-1.521014247	-1.521014247	-1.521014247	0.927938682	-1.465458692	1.521014247	-1.451569803	0	0	0	2.448952929	0.055555556	3.042028494	0.069444444	0	0	2.448952929	0.055555556	3.042028494	0.069444444	0	2.448952929	0.055555556	3.042028494	0.069444444	2.448952929	0.055555556	3.042028494	0.069444444	-2.393397374	0.593075565	-2.379508485	2.986472939	0.013888889	-2.97258405	1	1	1	1	1	1	1	1	1	1	1	1	0.999999
A6BLY7 [Keratin, type I cytoskeletal 28 ...]	0.557952922	-0.81845031	3.322021046	1.549394636	0.935767376	4.230583699	-1.109177717	4.752415186	-1.376403233	2.764068123	0.991441714	0.377814453	3.672630776	-1.667130639	4.194462263	4.140471356	2.367844947	1.754217686	5.049034009	-0.290727406	5.570865496	-1.772626409	-2.38625367	0.908562653	-4.431198762	1.43039414	-0.613627261	2.681189062	-2.658572353	3.203020549	3.294816323	-2.044945092	3.81664781	-5.339761415	0.521831487	5.861592902	0.431917	0.003977	0.002239	0.579431	1	0.000188	0.039371	4.90E-05	0.003464	2.70E-05	0.023506	0.772908	2.00E-06
A6X925;B7ZBY6;B7ZBY7;E9PY39;Q9D2M8;Q9CZY3;B2KF55 [Ubiquitin-conjugating enzyme E2 variant 2;Ubiquiti ...]	-0.024573056	0.58637339	-0.003490218	-0.003823267	0.675817969	0.140399124	-0.009147249	0.142063095	0.610946446	0.021082837	0.020749789	0.700391025	0.16497218	0.015425807	0.166636151	-0.589863609	-0.590196658	0.089444579	-0.445974266	-0.595520639	-0.444310295	-0.000333049	0.679308188	0.143889343	-0.00565703	0.145553314	0.679641236	0.144222391	-0.005323982	0.145886362	-0.535418845	-0.684965218	-0.533754874	-0.149546373	0.001663971	0.151210344	1	0.759364	1	1	0.754406	1	1	1	0.727573	1	1	0.704934	0.999999
A8DUK4;P02088;E9Q223;P02089;CON__Q3SX09;CON__P02070;P02104 [Hemoglobin subunit beta-1 ...]	0.903437901	2.449128709	0.492972493	2.641884434	-1.739661514	1.384125233	0.563582352	-1.787854044	1.545690807	-0.410465408	1.738446533	-2.643099415	0.480687332	-0.339855549	-2.691291945	-1.956156216	0.192755725	-4.188790222	-1.065003476	-1.885546357	-4.236982753	2.148911941	-2.232634007	0.89115274	0.070609859	-2.280826537	-4.381545948	-1.257759201	-2.078302082	-4.429738478	3.123786747	2.303243866	-0.04819253	-0.820542881	-3.171979277	-2.351436396	0.073268	0.00145	0.217014	0.001124	0.148153	0.022012	0.155121	0.140896	0.058664	0.785177	0.038781	0.003847	0.6809
A8R0W3 [ ...]	0	0	0	0	4.915153344	0.055555556	0	0.069444444	0	0	0	4.915153344	0.055555556	0	0.069444444	0	0	4.915153344	0.055555556	0	0.069444444	0	4.915153344	0.055555556	0	0.069444444	4.915153344	0.055555556	0	0.069444444	-4.859597788	-4.915153344	-4.845708899	-0.055555556	0.013888889	0.069444444	1	1	1	1	1	1	1	1	1	1	1	1	0.999999
A8XY17;A2A4J8;Q9CQ80 [Vacuolar protein-sorting-associated protein 25 ...]	0	0	0	0	2.396998682	0.055555556	0	0.069444444	0	0	0	2.396998682	0.055555556	0	0.069444444	0	0	2.396998682	0.055555556	0	0.069444444	0	2.396998682	0.055555556	0	0.069444444	2.396998682	0.055555556	0	0.069444444	-2.341443126	-2.396998682	-2.327554238	-0.055555556	0.013888889	0.069444444	1	1	1	1	1	1	1	1	1	1	1	1	0.999999
A9R9W0;A2CEL1;P11588;A2CEL0;L7MUC7;A2CEK9 [Major urinary protein 1 ...]	2.135916042	-6.337933832	1.865504879	1.821800527	1.698636777	1.982719433	-1.378853126	2.145815174	-8.473849874	-0.270411162	-0.314115515	-0.437279264	-0.153196609	-3.514769168	0.009899132	8.203438712	8.159734359	8.036570609	8.320653265	4.959080706	8.483749006	-0.043704352	-0.166868102	0.117214553	-3.244358006	0.280310294	-0.12316375	0.160918906	-3.200653653	0.324014647	0.284082656	-3.077489903	0.447178397	-3.361572559	0.163095741	3.5246683	0.000227	0	0.005123	0.00773	0.03851	0.001122	0	2.00E-04	0	0.079726	0.046509	0.008305	0.37795
B1ARA3;P61255;B1ARA5 [60S ribosomal protein L26 ...]	-0.857238236	-0.74534241	0.058448304	-0.176267346	0.931050623	0.500746125	0.049787533	0.50488173	0.111895826	0.91568654	0.68097089	1.788288859	1.357984361	0.907025769	1.362119966	0.803790714	0.569075064	1.676393033	1.246088535	0.795129943	1.25022414	-0.23471565	0.872602319	0.442297821	-0.008660771	0.446433426	1.107317969	0.677013471	0.226054879	0.681149076	-0.430304498	-0.88126309	-0.426168893	-0.450958592	0.004135605	0.455094197	0.148347	0.205663	1	1	0.109373	0.387722	1	0.379288	0.970379	0.099105	0.23273	0.007483	0.018827
B1ARC0;B1ARB9;S4R1I6;Q8BTS0;Q61656 [Probable ATP-dependent RNA helicase DDX5 ...]	0	1.734458546	0	0	0	0.055555556	0	0.069444444	1.734458546	0	0	0	0.055555556	0	0.069444444	-1.734458546	-1.734458546	-1.734458546	-1.67890299	-1.734458546	-1.665014101	0	0	0.055555556	0	0.069444444	0	0.055555556	0	0.069444444	0.055555556	0	0.069444444	-0.055555556	0.013888889	0.069444444	1	1	1	1	1	1	1	1	1	1	1	1	0.999999
B1AT92;Q60631;B1AT95 [Growth factor receptor-bound protein 2 ...]	0.415520088	1.324210257	-0.003490218	-0.003823267	-0.023847091	0.140399124	-0.009147249	0.142063095	0.908690169	-0.419010306	-0.419343355	-0.439367179	-0.275120963	-0.424667336	-0.273456993	-1.327700476	-1.328033524	-1.348057349	-1.183811133	-1.333357506	-1.182147162	-0.000333049	-0.020356873	0.143889343	-0.00565703	0.145553314	-0.020023824	0.144222391	-0.005323982	0.145886362	0.164246216	0.014699843	0.165910187	-0.149546373	0.001663971	0.151210344	0.985748	0.352637	1	1	1	1	1	1	0.563458	0.967881	1	0.898316	0.999999
B1AXP0;B1AXN9;E9PWV3;Q505N6;F6RQA2;F6Q8A4;P18653;P18654;F6UG16;B1AXN8;B2GVN8;A2CEE8;B1AXN5;B1B0X1;A0A338P701;G3UZI3;A2CEE6;A2CEE5;E9PUP0;A2CEE7;E9QK39;Q9WUT3;Q7TPS0 [Ribosomal protein S6 kinase;Ribosomal protein S6 k ...]	-0.024573056	0.772077428	-0.003490218	-0.003823267	-0.023847091	0.140399124	-0.009147249	0.142063095	0.796650483	0.021082837	0.020749789	0.000725964	0.16497218	0.015425807	0.166636151	-0.775567646	-0.775900695	-0.795924519	-0.631678303	-0.781224676	-0.630014332	-0.000333049	-0.020356873	0.143889343	-0.00565703	0.145553314	-0.020023824	0.144222391	-0.005323982	0.145886362	0.164246216	0.014699843	0.165910187	-0.149546373	0.001663971	0.151210344	1	0.655537	1	1	1	1	1	1	0.630492	1	1	1	0.999999
B1AXW5;B1AXW6;P35700;B1AXW4;B1AZS9;O08807 [Peroxiredoxin-1 ...]	-2.186027525	-0.749462797	-0.991205118	-1.127036525	1.045226989	-0.10761174	1.916129729	-0.268966151	1.436564728	1.194822408	1.058991	3.231254514	2.078415785	4.102157254	1.917061375	-0.241742321	-0.377573728	1.794689786	0.641851057	2.665592526	0.480496646	-0.135831408	2.036432106	0.883593377	2.907334847	0.722238967	2.172263514	1.019424785	3.043166254	0.858070375	-1.152838729	0.87090274	-1.31419314	2.023741469	-0.16135441	-2.18509588	0.682352	0.027305	0.040335	0.072548	1.60E-05	0.000788	2.00E-06	0.001364	0.002235	0.000691	0.001639	0	1.00E-05
B1B1A8;Q6PDN3 [Myosin light chain kinase, smooth muscle;Myosin li ...]	-1.860192152	-2.809347606	0.722350044	-2.166150265	-2.18617409	-2.021927874	-1.182431396	-2.020263903	-0.949155454	2.582542196	-0.305958113	-0.325981938	-0.161735722	0.677760756	-0.160071751	3.53169765	0.643197341	0.623173516	0.787419732	1.62691621	0.789083703	-2.888500309	-2.908524134	-2.744277918	-1.90478144	-2.742613947	-0.020023824	0.144222391	0.983718869	0.145886362	0.164246216	1.003742693	0.165910187	0.839496478	0.001663971	-0.837832507	0.02805	0.005984	1	0.017633	0.016014	0.022766	0.086098	0.022082	0.541992	0.058522	1	0.991222	0.999999
B7FAV1;B7FAU9;Q8BTM8;F6XC15;Q8VHX6;F6Z2C0;J3JS91 [Filamin-A ...]	1.647200618	3.913700968	0.404227293	1.889808924	-0.225074305	0.29595462	0.254579038	0.300090225	2.26650035	-1.242973325	0.242608306	-1.872274923	-1.351245997	-1.39262158	-1.347110393	-3.509473675	-2.023892044	-4.138775273	-3.617746347	-3.65912193	-3.613610743	1.485581631	-0.629301598	-0.108272673	-0.149648255	-0.104137068	-2.114883229	-1.593854303	-1.635229886	-1.589718699	0.521028926	0.479653343	0.525164531	-0.041375582	0.004135605	0.045511187	1.40E-05	0	0.109553	2.10E-05	1	0.044726	0.156754	0.042294	3.00E-06	0.005363	0.523614	0.000186	0.000193
B7ZCP7;B7ZCP6;E9Q806;B7ZCP4;Q8C166;V9GWY2;V9GX86;B7ZCP8;B7ZCP5;A3KGK7 [Copine-1 ...]	-0.419905942	-0.30700416	-0.473882747	-0.564102759	-0.263991539	-0.020608135	0.353253199	0.006651407	0.112901782	-0.053976805	-0.144196817	0.155914404	0.399297808	0.773159142	0.426557349	-0.166878587	-0.257098599	0.043012621	0.286396025	0.660257359	0.313655567	-0.090220012	0.209891208	0.453274612	0.827135946	0.480534154	0.300111221	0.543494625	0.917355959	0.570754166	0.243383404	0.617244738	0.270642946	0.373861334	0.027259542	-0.346601792	1	1	1	1	1	0.99977	0.602798	0.988667	1	1	1	1	0.910912
B7ZNJ1;A0A087WS56;B9EHT6;A0A087WSN6;Q3UHL6;A0A087WR50;P11276;Q4KL80;A0A087WSU6;A0A087WS99 [Fibronectin;Anastellin ...]	1.843054081	-0.629510475	1.085431949	0.175343112	-2.219204117	1.789787755	-2.128398374	-1.285593551	-2.472564556	-0.757622132	-1.667710969	-4.062258198	-0.053266326	-3.971452455	-3.128647633	1.714942424	0.804853587	-1.589693642	2.41929823	-1.498887899	-0.656083076	-0.910088837	-3.304636066	0.704355806	-3.213830323	-2.3710255	-2.394547229	1.614444643	-2.303741486	-1.460936663	4.008991872	0.090805742	0.933610565	-3.918186129	-3.075381306	0.842804823	0.005016	0	0	0	0	0.000499	0	0	0	5.00E-06	0	0	0.68635
B8JJM5;F6VQX8;B8JJN0;P04186;F6XQ00;B8JJM6;H3BK95;B8JJM3;F6W2T4 [Complement factor B;Complement factor B Ba fragmen ...]	0.276374696	-1.108768704	0.594445931	-0.812941813	-1.399372965	0.122842166	-1.738548614	-0.895743792	-1.3851434	0.318071234	-1.08931651	-1.675747661	-0.153532531	-2.014923311	-1.172118488	1.703214634	0.29582689	-0.290604261	1.231610869	-0.629779911	0.213024912	-1.407387744	-1.993818896	-0.471603765	-2.332994545	-1.490189722	-0.586431152	0.935783979	-0.925606801	-0.082801978	1.522215131	-0.339175649	0.503629173	-1.86139078	-1.018585957	0.842804823	1.00E-06	0	1.70E-05	0	0	7.50E-05	0	0	1.00E-06	0.034897	1.30E-05	0	0.718275
B8JK51;Q8K015 [Centromere protein O ...]	0	2.884293909	0	0	0	0.055555556	0	0.069444444	2.884293909	0	0	0	0.055555556	0	0.069444444	-2.884293909	-2.884293909	-2.884293909	-2.828738354	-2.884293909	-2.814849465	0	0	0.055555556	0	0.069444444	0	0.055555556	0	0.069444444	0.055555556	0	0.069444444	-0.055555556	0.013888889	0.069444444	1	1	1	1	1	1	1	1	1	1	1	1	0.999999
CON__A2A4G1;B1AQ77;Q61414;CON__Q99456 [Keratin, type I cytoskeletal 15 ...]	-0.158743781	-0.583728511	-1.343654647	0.879724975	-0.61646708	-0.070802183	0.747131901	-0.207706149	-0.42498473	-1.184910866	1.038468756	-0.457723299	0.087941598	0.905875682	-0.048962368	-0.759926136	1.463453486	-0.032738569	0.512926328	1.330860412	0.376022362	2.223379622	0.727187567	1.272852464	2.090786548	1.135948498	-1.496192055	-0.950527158	-0.132593074	-1.087431124	0.545664897	1.363598981	0.408760931	0.817934084	-0.136903966	-0.95483805	0.000807	0.255874	0.001103	0	0.40244	0.000949	1.00E-06	0.001353	0.006267	5.00E-06	1.60E-05	0.004098	0.740169
CON__ENSEMBL:ENSBTAP00000038253 [ ...]	-0.4435878	-1.665879245	0.409114097	0.621754803	0.226930995	1.379187589	-0.621754803	1.710069672	-1.222291445	0.852701896	1.065342603	0.670518794	1.822775389	-0.178167003	2.153657471	2.074993341	2.287634047	1.892810239	3.045066834	1.044124442	3.375948916	0.212640706	-0.182183102	0.970073493	-1.030868899	1.300955575	-0.394823808	0.757432786	-1.243509606	1.088314869	1.152256595	-0.848685797	1.483138677	-2.000942392	0.330882082	2.331824474	0	0	0.01603	1	0.001476	1.00E-06	0	0	0	1.00E-06	0	3.40E-05	0
CON__P00761 [ ...]	-1.930546796	-2.384805419	-0.220046092	-0.927976506	-0.739763414	0.68518268	0.68518268	0.68518268	-0.454258623	1.710500704	1.002570289	1.190783382	2.615729476	2.615729476	2.615729476	2.164759327	1.456828912	1.645042005	3.069988099	3.069988099	3.069988099	-0.707930414	-0.519717321	0.905228772	0.905228772	0.905228772	0.188213093	1.613159187	1.613159187	1.613159187	1.424946094	1.424946094	1.424946094	0	0	0	1	1	1	1	1	1	1	1	1	1	1	1	0.999999
CON__P01966;A7M7S6;P06467 [ ...]	-0.236899016	0.801192623	-1.04424852	1.275428767	-3.04937298	0.4414035	0.543744785	-2.513764491	1.03809164	-0.807349504	1.512327784	-2.812473963	0.678302516	0.780643801	-2.276865474	-1.845441143	0.474236144	-3.850565603	-0.359789124	-0.257447838	-3.314957114	2.319677287	-2.00512446	1.485652019	1.587993305	-1.469515971	-4.324801747	-0.834025268	-0.731683982	-3.789193258	3.490776479	3.593117765	0.535608489	0.102341286	-2.95516799	-3.057509276	0.004637	0	0.005728	0	0	2.30E-05	0	0	1.00E-06	0.000229	0	0	0.000375
CON__P02533;Q61781 [Keratin, type I cytoskeletal 14 ...]	0.099890063	-0.325094667	-1.415113298	1.138358819	-0.44983038	0.279952938	0.488498057	0.266283859	-0.42498473	-1.515003361	1.038468756	-0.549720443	0.180062875	0.388607994	0.166393796	-1.090018631	1.463453486	-0.124735713	0.605047605	0.813592724	0.591378526	2.553472117	0.965282918	1.695066236	1.903611354	1.681397157	-1.588189199	-0.858405881	-0.649860762	-0.87207496	0.729783318	0.938328437	0.716114239	0.208545119	-0.013669079	-0.222214198	0.000325	0.188906	0.000191	0	0.937715	8.00E-05	2.90E-05	4.70E-05	0.002929	3.00E-06	6.00E-06	0.000513	0.198861
CON__P02538;CON__Q8VED5;Q8VED5;CON__Q14CN4-1 [ ...]	-0.026090123	-2.045228668	-0.386408426	0.027956467	-0.47211419	0.516534034	-0.839946461	0.594189687	-2.019138545	-0.360318303	0.05404659	-0.446024068	0.542624157	-0.813856338	0.62027981	1.658820241	2.073185135	1.573114477	2.561762702	1.205282207	2.639418354	0.414364893	-0.085705764	0.90294246	-0.453538035	0.980598113	-0.500070657	0.488577567	-0.867902928	0.56623322	0.988648224	-0.36783227	1.066303877	-1.356480495	0.077655653	1.434136148	9.00E-05	0	2.00E-05	0.000154	3.00E-06	0.041694	0	0.124215	0	0.025177	0.943777	0.006335	0.001922
CON__P02768-1 [ ...]	1.722781299	2.175124897	1.486844334	-2.864810291	-2.717160406	1.048310404	-2.972450993	-0.655914602	0.452343598	-0.235936965	-4.587591591	-4.439941706	-0.674470896	-4.695232293	-2.378695901	-0.688280563	-5.039935189	-4.892285304	-1.126814494	-5.14757589	-2.831039499	-4.351654625	-4.20400474	-0.43853393	-4.459295327	-2.142758936	0.147649885	3.913120695	-0.107640702	2.20889569	3.76547081	-0.255290587	2.061245805	-4.020761397	-1.704225005	2.316536391	0.000146	0.002749	8.70E-05	0	0	5.00E-06	0	0	0.058299	0.366958	0	0	0.008876
CON__P02769 [ ...]	1.280512329	1.222910758	1.480967024	-4.21091938	-2.314033508	2.993747203	-2.806926274	1.411275054	-0.057601571	0.200454696	-5.491431709	-3.594545837	1.713234874	-4.087438603	0.130762726	0.258056267	-5.433830138	-3.536944266	1.770836445	-4.029837032	0.188364297	-5.691886404	-3.795000532	1.512780179	-4.287893298	-0.06969197	1.896885872	7.204666583	1.403993106	5.622194434	5.307780711	-0.492892766	3.725308562	-5.800673477	-1.582472149	4.218201328	5.80E-05	0.000137	0.000539	0	1.00E-06	0.619702	0	0.000107	0.980251	0.586797	0	1.00E-05	2.30E-05
CON__P04264 [ ...]	-0.942861548	-1.646728326	0.25452582	0.357172509	0.554750967	1.337155193	-0.554750967	1.243048647	-0.703866778	1.197387368	1.300034057	1.497612515	2.280016741	0.388110581	2.185910194	1.901254146	2.003900835	2.201479293	2.983883519	1.091977359	2.889776973	0.102646688	0.300225146	1.082629373	-0.809276787	0.988522826	0.197578458	0.979982684	-0.911923476	0.885876138	0.782404226	-1.109501934	0.68829768	-1.89190616	-0.094106546	1.797799613	0	0	0.002397	0.022794	1	2.00E-06	2.00E-06	5.00E-06	2.00E-06	0	0	0	0
CON__P05784;P05784 [Keratin, type I cytoskeletal 18 ...]	-1.197086096	-2.500639097	-1.915055885	-0.610132592	-0.267497494	-3.141068605	1.251267344	-1.492543281	-1.303553002	-0.71796979	0.586953504	0.929588601	-1.94398251	2.448353439	-0.295457186	0.585583212	1.890506506	2.233141603	-0.640429508	3.751906441	1.008095816	1.304923294	1.647558391	-1.22601272	3.166323229	0.422512604	0.342635098	-2.530936014	1.861399936	-0.88241069	-2.873571111	1.518764838	-1.225045787	4.392335949	1.648525324	-2.743810625	1	0.001436	0.054935	0.060128	0.00686	0.010857	1.00E-05	0.615259	0.001221	0.037302	0.086597	0.010027	0.009168
CON__P07744;P07744 [Keratin, type II cytoskeletal 4 ...]	0.607035321	-0.031177102	0.217454204	1.678092716	1.65214465	-0.446729034	-1.269852017	-0.471615339	-0.638212423	-0.389581117	1.071057395	1.045109329	-1.053764355	-1.876887338	-1.07865066	0.248631306	1.709269819	1.683321752	-0.415551931	-1.238674915	-0.440438237	1.460638512	1.434690446	-0.664183238	-1.487306221	-0.689069543	-0.025948066	-2.12482175	-2.947944733	-2.149708056	-2.098873684	-2.921996667	-2.12375999	-0.823122983	-0.024886306	0.798236678	0.514745	0.110198	0.38393	0.809797	0.787589	0.159716	0.004837	0.149655	0.494882	0.94203	0.211877	0.218868	0.437711
CON__P08727 [ ...]	-1.380415487	-0.888016459	-1.277125241	-0.844863599	-0.282937676	-0.62592084	0.963337487	-0.594744858	0.492399027	0.103290246	0.535551888	1.09747781	0.754494647	2.343752974	0.785670629	-0.389108782	0.043152861	0.605078783	0.262095619	1.851353947	0.293271602	0.432261642	0.994187565	0.651204401	2.240462729	0.682380383	0.561925923	0.218942759	1.808201086	0.250118741	-0.342983164	1.246275164	-0.311807181	1.589258328	0.031175983	-1.558082345	0.01378	0.71587	0.055448	0.561075	0.002403	0.068933	0	0.025514	0.003591	0.601466	0.002342	6.40E-05	0.000565
CON__P08730-1;P08730 [Keratin, type I cytoskeletal 13 ...]	0.014684183	-1.342622388	-3.460883044	0.407070438	-0.493298995	0.782827717	-0.393723747	0.306796617	-1.357306571	-3.475567227	0.392386255	-0.507983178	0.768143534	-0.408407929	0.292112434	-2.118260656	1.749692826	0.849323392	2.125450105	0.948898641	1.649419005	3.867953482	2.967584048	4.243710761	3.067159297	3.767679661	-0.900369433	0.375757279	-0.800794184	-0.100273821	1.276126713	0.099575249	0.800095613	-1.176551464	-0.4760311	0.700520364	0.091285	5.00E-06	2.10E-05	1	0.000936	0.189397	0.011737	0.924998	4.50E-05	2.20E-05	0.08355	0.026966	0.011233
CON__P08779;CON__Q9Z2K1;CON__Q3ZAW8;Q9Z2K1;Q9WTL4 [Keratin, type I cytoskeletal 16 ...]	0.099890063	-0.325094667	-1.384072068	1.25363886	-0.44983038	0.418173017	0.488498057	0.447496048	-0.42498473	-1.483962131	1.153748797	-0.549720443	0.318282954	0.388607994	0.347605985	-1.058977401	1.578733527	-0.124735713	0.743267684	0.813592724	0.772590715	2.637710928	0.934241688	1.802245085	1.872570125	1.831568116	-1.70346924	-0.835465843	-0.765140803	-0.806142812	0.868003397	0.938328437	0.897326428	0.07032504	0.029323031	-0.041002009	7.10E-05	0.10247	0.000131	0	0.864828	5.20E-05	1.00E-05	2.00E-06	0.000723	1.00E-06	1.00E-06	0.00011	0.03916
CON__P13645;CON__Q7Z3Y7;CON__Q7Z3Z0;CON__Q7Z3Y8;CON__Q148H6;CON__Q2M2I5 [ ...]	0.26997966	-1.626381544	0.081424099	0.87065975	0.01201709	0.924470052	-0.598214699	1.272377045	-1.896361204	-0.188555561	0.60068009	-0.25796257	0.654490393	-0.868194359	1.002397385	1.707805643	2.497041295	1.638398635	2.550851597	1.028166846	2.898758589	0.789235651	-0.069407009	0.843045953	-0.679638798	1.190952946	-0.85864266	0.053810302	-1.468874449	0.401717295	0.912452962	-0.610231789	1.260359955	-1.522684751	0.347906992	1.870591743	0.005867	0	0.000454	0.016311	0.000242	0.011132	1.00E-06	3.50E-05	0	0.026676	1.60E-05	0.014362	2.00E-05
CON__P13647 [ ...]	0.156172563	-2.259507334	-1.160669229	-0.285260631	-0.143610967	0.156287351	-0.803104165	0.562884639	-2.415679896	-1.316841792	-0.441433193	-0.29978353	0.000114788	-0.959276728	0.406712077	1.098838104	1.974246703	2.115896366	2.415794684	1.456403168	2.822391973	0.875408599	1.017058262	1.31695658	0.357565064	1.723553868	0.141649663	0.441547981	-0.517843535	0.84814527	0.299898318	-0.659493198	0.706495607	-0.959391516	0.406597289	1.365988805	0.000562	0	6.00E-05	1.20E-05	2.80E-05	0.00057	0	0.111452	0	0.00051	0.007214	0.047465	0.999999
CON__P19001;P19001 [Keratin, type I cytoskeletal 19 ...]	-1.411033623	-0.918634596	-1.223549431	-0.859000256	-0.313555813	-0.656538977	0.993955624	-0.625362994	0.492399027	0.187484192	0.552033367	1.09747781	0.754494647	2.404989247	0.785670629	-0.304914835	0.05963434	0.605078783	0.262095619	1.91259022	0.293271602	0.364549175	0.909993618	0.567010454	2.217505055	0.598186437	0.545444444	0.20246128	1.85295588	0.233637262	-0.342983164	1.307511437	-0.311807181	1.650494601	0.031175983	-1.619318618	0.001895	0.581092	0.051738	0.258857	0.000471	0.023791	0	0.005598	0.000129	0.047764	7.20E-05	6.00E-06	5.30E-05
CON__P19012 [ ...]	-0.77161473	-0.420805345	-1.598640174	-0.207999599	-0.545541058	0.092120983	0.584208735	-0.087068647	0.350809385	-0.827025444	0.563615131	0.226073672	0.863735713	1.355823465	0.684546083	-1.177834829	0.212805747	-0.124735713	0.512926328	1.005014081	0.333736699	1.390640576	1.053099116	1.690761157	2.182848909	1.511571527	-0.33754146	0.300120581	0.792208334	0.120930952	0.637662041	1.129749793	0.458472411	0.492087752	-0.17918963	-0.671277382	0.246141	0.308071	0.000257	0.02009	1	0.001407	9.00E-06	0.004104	0.027333	0.000598	0.002086	0.150841	0.000257
CON__P35527 [ ...]	-1.031979375	-2.527610626	-0.074460373	0.166530594	0.503825819	1.287070718	-0.181876131	1.492348645	-1.495631251	0.957519002	1.198509969	1.535805194	2.319050093	0.850103244	2.52432802	2.453150253	2.69414122	3.031436445	3.814681344	2.345734495	4.019959271	0.240990967	0.578286192	1.361531091	-0.107415758	1.566809018	0.337295225	1.120540124	-0.348406725	1.325818051	0.783244899	-0.68570195	0.988522826	-1.468946849	0.205277927	1.674224776	0.000135	0	0.513355	1	0.158954	0.00029	0.10138	6.80E-05	1.60E-05	0.004068	0.000684	1.20E-05	0
CON__P35908 [ ...]	0.228461416	-1.089928648	0.522720661	0.176283055	0.280450116	1.693620829	-0.46704239	1.430482491	-1.318390064	0.294259245	-0.052178361	0.0519887	1.465159413	-0.695503807	1.202021075	1.612649309	1.266211703	1.370378764	2.783549477	0.622886258	2.520411139	-0.346437606	-0.242270545	1.170900168	-0.989763052	0.90776183	0.104167061	1.517337774	-0.643325446	1.254199436	1.413170713	-0.747492506	1.150032375	-2.160663219	-0.263138338	1.897524882	0.022104	0	0.789471	0.007633	0.061922	0	2.00E-06	1.00E-06	0	0.007352	0.765882	0.704934	0
CON__P48668;CON__P04259 [ ...]	-0.026090123	-2.045228668	-0.386408426	0.027956467	-0.47211419	0.491572592	-0.839946461	0.594189687	-2.019138545	-0.360318303	0.05404659	-0.446024068	0.517662715	-0.813856338	0.62027981	1.658820241	2.073185135	1.573114477	2.53680126	1.205282207	2.639418354	0.414364893	-0.085705764	0.877981018	-0.453538035	0.980598113	-0.500070657	0.463616125	-0.867902928	0.56623322	0.963686782	-0.36783227	1.066303877	-1.331519053	0.102617095	1.434136148	0.000173	0	3.10E-05	0.000299	6.00E-06	0.044055	1.00E-06	0.155073	0	0.037648	0.988418	0.012326	0.005455
CON__P50446;P50446;Q3UV11;Q9Z331 [Keratin, type II cytoskeletal 6A;Keratin, type II ...]	0.617604135	-1.456653525	1.031735035	1.967040256	1.737190915	1.598309785	-1.289937573	2.275778125	-2.07425766	0.4141309	1.349436121	1.11958678	0.98070565	-1.907541709	1.65817399	2.48838856	3.423693782	3.19384444	3.054963311	0.166715952	3.732431651	0.935305221	0.70545588	0.56657475	-2.321672608	1.24404309	-0.229849342	-0.368730471	-3.25697783	0.308737869	-0.138881129	-3.027128488	0.538587211	-2.888247359	0.67746834	3.565715699	0.646681	0.010406	1	0.640216	0.812456	0.99977	0.014624	0.41055	0.045105	0.904151	0.203085	0.297079	0.399969
CON__Q04695;CON__Q9QWL7;Q9QWL7;CON__Q61782;CON__P35900;CON__Q8N1A0;CON__Q9C075;CON__Q99PS0;Q99PS0 [Keratin, type I cytoskeletal 17 ...]	-0.798662787	-0.447853402	-1.126542345	-0.022868672	-0.572589115	0.187833347	0.611256792	0.081167465	0.350809385	-0.327879558	0.775794115	0.226073672	0.986496134	1.409919579	0.879830252	-0.678688943	0.42498473	-0.124735713	0.635686749	1.059110195	0.529020867	1.103673673	0.55395323	1.314375692	1.737799137	1.20770981	-0.549720443	0.210702019	0.634125464	0.104036137	0.760422462	1.183845907	0.65375658	0.423423445	-0.106665882	-0.530089327	0.199581	0.255874	0.005654	0.000838	0.978195	9.30E-05	4.00E-06	0.000247	0.017797	0.05039	0.000132	0.11637	1.70E-05
CON__Q6IFZ6;Q6IFZ6;CON__Q7Z794 [Keratin, type II cytoskeletal 1b ...]	0.243188373	-3.032796733	-3.83427026	-2.824646427	-2.435970415	-0.026160245	-1.022917977	-1.019032298	-3.275985105	-4.077458632	-3.067834799	-2.679158788	-0.269348618	-1.266106349	-1.26222067	-0.801473527	0.208150306	0.596826318	3.006636488	2.009878756	2.013764435	1.009623833	1.398299844	3.808110015	2.811352283	2.815237962	0.388676011	2.798486182	1.80172845	1.805614129	2.40981017	1.413052439	1.416938118	-0.996757732	-0.992872053	0.003885679	0.008239	0	7.00E-06	0	1.00E-06	0.001291	9.00E-06	8.00E-06	0	1.40E-05	1.00E-06	4.00E-06	0.383114
CON__Q6IME9;Q6IME9 [Keratin, type II cytoskeletal 72 ...]	0.64617064	-3.129319425	1.341533787	1.051095858	0.628008327	1.337810019	-1.329385051	-1.054766561	-3.775490065	0.695363147	0.404925218	-0.018162314	0.691639379	-1.975555691	-1.700937202	4.470853212	4.180415283	3.757327751	4.467129443	1.799934374	2.074552863	-0.290437929	-0.713525461	-0.003723769	-2.670918838	-2.396300349	-0.423087531	0.286714161	-2.380480909	-2.10586242	0.709801692	-1.957393378	-1.682774888	-2.66719507	-2.39257658	0.274618489	0.763326	0.001007	1	1	0.656358	1	0.021662	0.040632	0.005328	0.72287	0.982464	1	0.796928
CON__Q86YZ3 [ ...]	0.675726762	-3.260911144	-2.019352531	0.024892569	-0.336715433	2.924707429	-2.036620378	2.149657293	-3.936637906	-2.695079293	-0.650834192	-1.012442194	2.248980667	-2.712347139	1.473930531	1.241558613	3.285803714	2.924195712	6.185618573	1.224290767	5.410568437	2.044245101	1.682637099	4.94405996	-0.017267846	4.169009824	-0.361608002	2.89981486	-2.061512947	2.124764723	3.261422862	-1.699904945	2.486372725	-4.961327807	-0.775050137	4.18627767	0.000189	0	0	1.00E-05	2.00E-06	0.003725	0	0.924998	1.00E-06	1.00E-06	0.018108	0.001153	3.00E-06
CON__Q922U2;Q922U2 [Keratin, type II cytoskeletal 5 ...]	-0.685814036	-2.985919047	-1.8871597	-1.346933312	-0.423454398	-0.765418451	0.062054279	-0.867284233	-2.300105011	-1.201345664	-0.661119276	0.262359638	-0.079604415	0.747868315	-0.181470197	1.098759347	1.638985736	2.56246465	2.220500597	3.047973327	2.118634815	0.540226388	1.463705302	1.121741249	1.949213979	1.019875467	0.923478914	0.581514861	1.408987591	0.479649079	-0.341964053	0.485508677	-0.443829835	0.82747273	-0.101865782	-0.929338512	0.024105	0	0.00068	0.000299	0.177578	0.013503	0.781922	0.01351	3.00E-06	0.007074	0.019397	0.35587	0.964237
CON__Q9D312;Q9D312 [Keratin, type I cytoskeletal 20 ...]	-2.683500937	-2.025204706	-3.781100038	-1.61842237	-0.967942293	-0.10603679	0.337225037	-1.011513964	0.658296231	-1.097599102	1.065078567	1.715558644	2.577464146	3.020725973	1.671986973	-1.755895333	0.406782336	1.057262413	1.919167915	2.362429743	1.013690742	2.162677669	2.813157745	3.675063248	4.118325075	2.769586075	0.650480077	1.51238558	1.955647407	0.606908406	0.861905503	1.30516733	-0.043571671	0.443261827	-0.905477173	-1.348739001	1.00E-05	1.00E-04	1.10E-05	0.000937	0.046078	0.652254	0.042423	0.036638	0.039513	0.013265	0.003273	0.000104	8.00E-06
CON__Q9D646;CON__A2A5Y0;Q9D646;Q8K0Y2;Q61765;CON__O76011;CON__Q6NTB9;CON__Q14525;CON__O76009;CON__Q9UE12;CON__Q15323;CON__Q8IUT8;CON__O76014;CON__REFSEQ:XP_986630;Q61897 [Keratin, type I cuticular Ha4;Keratin, type I cuti ...]	0	0	3.614329475	0	0	0.055555556	0	0.069444444	0	3.614329475	0	0	0.055555556	0	0.069444444	3.614329475	0	0	0.055555556	0	0.069444444	-3.614329475	-3.614329475	-3.558773919	-3.614329475	-3.54488503	0	0.055555556	0	0.069444444	0.055555556	0	0.069444444	-0.055555556	0.013888889	0.069444444	1	1	1	1	1	1	1	1	1	1	1	1	0.999999
CON__Q9DCV7;Q9DCV7;CON__Q3KNV1;CON__P08729;D3Z6N5;CON__Q9NSB2;CON__Q6ISB0;CON__Q6KB66-1;G5E846;A0A2R8W6R6;G3X981;P15331 [Keratin, type II cytoskeletal 7 ...]	-1.732149332	-3.509144179	-0.924899206	-0.74347662	-0.006088355	-1.321862092	0.967008982	-0.884865633	-1.776994848	0.807250126	0.988672712	1.726060977	0.41028724	2.699158314	0.847283699	2.584244974	2.765667559	3.503055824	2.187282088	4.476153162	2.624278547	0.181422586	0.918810851	-0.396962886	1.891908188	0.040033573	0.737388265	-0.578385472	1.710485602	-0.141389013	-1.315773737	0.973097337	-0.878777278	2.288871074	0.436996459	-1.851874615	0.442013	0.006144	1	1	0.280852	0.938192	0.025621	1	0.042104	0.406448	0.273999	0.049014	0.808717
CON__Q9NSB4;Q99M74 [Keratin, type II cuticular Hb2 ...]	2.481367154	-1.292817454	3.683463388	-0.010141021	-0.051427252	0.173018063	-0.021793276	0.172919665	-3.774184608	1.202096234	-2.491508175	-2.532794405	-2.30834909	-2.50316043	-2.308447488	4.976280842	1.282676433	1.241390203	1.465835517	1.271024178	1.465737119	-3.693604409	-3.734890639	-3.510445324	-3.705256664	-3.510543722	-0.04128623	0.183159085	-0.011652255	0.183060687	0.224445315	0.029633975	0.224346917	-0.19481134	-9.84E-05	0.194712941	0	0	0	0.000808	1.00E-06	0	7.50E-05	0	0	2.00E-06	0	0	0
D3YTY9;A0A0R4J038;O08677;D3Z2B2 [Kininogen-1;Kininogen-1 heavy chain;Bradykinin;Kin ...]	2.032183148	1.454308594	2.689915421	1.085837182	-2.213871381	1.33267171	-2.223927711	-2.293671233	-0.577874555	0.657732273	-0.946345967	-4.246054529	-0.699511438	-4.256110859	-4.325854381	1.235606828	-0.368471412	-3.668179974	-0.121636883	-3.678236305	-3.747979827	-1.60407824	-4.903786802	-1.357243711	-4.913843132	-4.983586654	-3.299708562	0.246834528	-3.309764893	-3.379508415	3.546543091	-0.01005633	-0.079799852	-3.556599421	-3.626342943	-0.069743522	0.747493	0.02708	0.196424	0.003526	4.00E-06	0.016592	1.00E-06	0	0.092939	0.059729	0.011299	6.00E-06	0.05224
D3YVB4;D3Z712;F8WJ41;P62245 [40S ribosomal protein S15a ...]	-0.024573056	1.788357479	-0.003490218	-0.003823267	-0.023847091	0.140399124	-0.009147249	0.142063095	1.812930535	0.021082837	0.020749789	0.000725964	0.16497218	0.015425807	0.166636151	-1.791847698	-1.792180746	-1.812204571	-1.647958355	-1.797504728	-1.646294384	-0.000333049	-0.020356873	0.143889343	-0.00565703	0.145553314	-0.020023824	0.144222391	-0.005323982	0.145886362	0.164246216	0.014699843	0.165910187	-0.149546373	0.001663971	0.151210344	1	0.183064	1	1	1	1	1	1	0.182777	1	1	1	0.999999
D3YWF6;Q7TQI3;D3Z7K0 [Ubiquitin thioesterase OTUB1 ...]	-0.663382923	-0.022858578	-0.126799934	-0.292993685	-0.63460232	0.694601438	-0.14406778	0.698737043	0.640524345	0.536582989	0.370389238	0.028780603	1.357984361	0.519315143	1.362119966	-0.103941356	-0.270135107	-0.611743742	0.717460016	-0.121209202	0.721595621	-0.166193751	-0.507802387	0.821401372	-0.017267846	0.825536977	-0.341608635	0.987595123	0.148925905	0.991730728	1.329203758	0.49053454	1.333339363	-0.838669218	0.004135605	0.842804823	0	0.002141	0.000164	2.00E-06	0	1.00E-06	5.00E-05	0	0	1.00E-06	1.00E-05	0.631897	0
D3YWL1;D3YW33;P35276 [Ras-related protein Rab-3D ...]	1.214559876	1.624970728	0	0	0	0.055555556	0	0.069444444	0.410410852	-1.214559876	-1.214559876	-1.214559876	-1.15900432	-1.214559876	-1.145115431	-1.624970728	-1.624970728	-1.624970728	-1.569415173	-1.624970728	-1.555526284	0	0	0.055555556	0	0.069444444	0	0.055555556	0	0.069444444	0.055555556	0	0.069444444	-0.055555556	0.013888889	0.069444444	1	1	1	1	1	1	1	1	1	1	1	1	0.999999
D3YX76;P15626 [Glutathione S-transferase Mu 2 ...]	-3.786936282	-6.136690409	-1.160442216	-2.622578807	0.623298705	-1.53789387	1.753366047	-0.637023752	-2.349754127	2.626494066	1.164357475	4.410234987	2.249042412	5.540302329	3.14991253	4.976248193	3.514111602	6.759989114	4.598796539	7.890056456	5.499666657	-1.462136591	1.783740921	-0.377451654	2.913808263	0.523418464	3.245877512	1.084684937	4.375944854	1.985555055	-2.161192575	1.130067342	-1.260322457	3.291259917	0.900870118	-2.390389799	0	0	0.001177	5.40E-05	0	0.22358	0	7.00E-06	0	0	8.00E-06	0	0
D3YY36;Q9DBD0;F6W4D3 [Inhibitor of carbonic anhydrase ...]	-0.12069571	-3.744095255	2.719200625	-2.626240218	-3.406909929	0.224998082	-2.916375389	0.312806234	-3.623399545	2.839896334	-2.505544508	-3.28621422	0.345693792	-2.79567968	0.433501943	6.463295879	1.117855037	0.337185325	3.969093337	0.827719865	4.056901489	-5.345440843	-6.126110554	-2.494202542	-5.635576014	-2.406394391	-0.780669711	2.8512383	-0.290135171	2.939046452	3.631908012	0.49053454	3.719716163	-3.141373472	0.087808152	3.229181623	0.007804	7.00E-06	1	4.70E-05	1.20E-05	0.026797	2.80E-05	0.033741	0.002606	0.011433	0.023012	0.004813	0.991613
D3YYH3;D3YUE8;D3Z223;P15327 [Phosphoglycerate mutase;Bisphosphoglycerate mutase ...]	0	0.698419847	0	3.980651668	0	0.055555556	0	0.069444444	0.698419847	0	3.980651668	0	0.055555556	0	0.069444444	-0.698419847	3.28223182	-0.698419847	-0.642864292	-0.698419847	-0.628975403	3.980651668	0	0.055555556	0	0.069444444	-3.980651668	-3.925096112	-3.980651668	-3.911207223	0.055555556	0	0.069444444	-0.055555556	0.013888889	0.069444444	1	1	1	1	1	1	1	1	1	1	1	1	0.999999
D3Z1A9;D3Z313;Q9DCC5;P23198 [Chromobox protein homolog 3 ...]	2.410572202	1.071067584	0	0	0	0.055555556	0	0.069444444	-1.339504618	-2.410572202	-2.410572202	-2.410572202	-2.355016646	-2.410572202	-2.341127757	-1.071067584	-1.071067584	-1.071067584	-1.015512029	-1.071067584	-1.00162314	0	0	0.055555556	0	0.069444444	0	0.055555556	0	0.069444444	0.055555556	0	0.069444444	-0.055555556	0.013888889	0.069444444	1	1	1	1	1	1	1	1	1	1	1	1	0.999999
D3Z1H8;D3Z1H9;Q9JL62 [Glycolipid transfer protein ...]	0	0.640382057	0	0	1.333346242	0.055555556	0	0.069444444	0.640382057	0	0	1.333346242	0.055555556	0	0.069444444	-0.640382057	-0.640382057	0.692964185	-0.584826502	-0.640382057	-0.570937613	0	1.333346242	0.055555556	0	0.069444444	1.333346242	0.055555556	0	0.069444444	-1.277790687	-1.333346242	-1.263901798	-0.055555556	0.013888889	0.069444444	1	1	1	1	1	1	1	1	1	1	1	1	0.999999
D3Z1T4;D3Z1M1;D3YZX3;E9QKR0;P62880;H3BLF7;H3BKR2;P29387;P62874;E9PWM7;Q61011 [Guanine nucleotide-binding protein G(I)/G(S)/G(T) ...]	0.47482399	1.125552778	0.835738521	-0.010141021	-0.051427252	0.173018063	-0.021793276	0.172919665	0.650728788	0.360914532	-0.484965011	-0.526251241	-0.301805926	-0.496617266	-0.301904324	-0.289814257	-1.135693799	-1.17698003	-0.952534715	-1.147346054	-0.952633113	-0.845879543	-0.887165773	-0.662720458	-0.857531798	-0.662818856	-0.04128623	0.183159085	-0.011652255	0.183060687	0.224445315	0.029633975	0.224346917	-0.19481134	-9.84E-05	0.194712941	2.00E-06	0	0	0.003163	6.00E-06	0	0.000336	0	0	0.000502	2.00E-06	1.00E-06	5.30E-05
D3Z1V4;P70296 [Phosphatidylethanolamine-binding protein 1;Hippoca ...]	-1.308500808	-0.897727225	-0.873520036	-0.381511349	-2.440890252	-2.385334697	2.440890252	-2.371445808	0.410773582	0.434980771	0.926989458	-1.132389445	-1.076833889	3.74939106	-1.062945	0.024207189	0.516215876	-1.543163027	-1.487607471	3.338617478	-1.473718582	0.492008687	-1.567370216	-1.51181466	3.314410288	-1.497925771	-2.059378903	-2.003823347	2.822401602	-1.989934458	0.055555556	4.881780504	0.069444444	4.826224949	0.013888889	-4.81233606	0.000469	0	0.000257	5.00E-05	1	0.829669	0	0.683267	0.104025	0.26798	0.028864	0.000455	0.000667
D3Z1Z8;D3Z5N2;P54227;P55821 [Stathmin;Stathmin-2 ...]	-0.021018641	1.292076456	-0.006167799	-0.006317754	-0.02758016	0.088174495	-0.012646028	0.100301014	1.313095097	0.014850842	0.014700887	-0.006561519	0.109193135	0.008372613	0.121319655	-1.298244255	-1.298394211	-1.319656616	-1.203901962	-1.304722484	-1.191775442	-0.000149955	-0.021412361	0.094342293	-0.006478229	0.106468813	-0.021262406	0.094492249	-0.006328273	0.106618769	0.115754655	0.014934133	0.127881175	-0.100820522	0.01212652	0.112947042	1	0.366439	1	1	1	1	1	1	0.358858	1	1	1	0.999999
D3Z2H9;E9Q5J9 [ ...]	1.833075378	2.789384291	-0.126799934	0.113571353	-0.63460232	0.694601438	-0.14406778	0.698737043	0.956308913	-1.959875312	-1.719504026	-2.467677699	-1.13847394	-1.977143158	-1.134338335	-2.916184225	-2.675812939	-3.423986612	-2.094782853	-2.933452071	-2.090647249	0.240371286	-0.507802387	0.821401372	-0.017267846	0.825536977	-0.748173673	0.581030085	-0.257639133	0.58516569	1.329203758	0.49053454	1.333339363	-0.838669218	0.004135605	0.842804823	0	0	0.002239	1	1.00E-06	1.00E-05	0.001086	8.00E-06	1.10E-05	0	1.00E-06	0	2.00E-06
D3Z2U2;D3Z637;D3Z125;E9PUA7;D3Z7X7;F8WHQ1;Q62393 [Tumor protein D52 ...]	0	1.761216519	0	0	0	0.055555556	0	0.069444444	1.761216519	0	0	0	0.055555556	0	0.069444444	-1.761216519	-1.761216519	-1.761216519	-1.705660963	-1.761216519	-1.691772074	0	0	0.055555556	0	0.069444444	0	0.055555556	0	0.069444444	0.055555556	0	0.069444444	-0.055555556	0.013888889	0.069444444	1	1	1	1	1	1	1	1	1	1	1	1	0.999999
D3Z4N2;F8WIP8;P10923 [Osteopontin ...]	1.360217911	0	1.456848293	2.13328111	1.240845236	2.740530431	0	5.273100755	-1.360217911	0.096630382	0.773063199	-0.119372676	1.38031252	-1.360217911	3.912882844	1.456848293	2.13328111	1.240845236	2.740530431	0	5.273100755	0.676432816	-0.216003058	1.283682138	-1.456848293	3.816252462	-0.892435874	0.607249321	-2.13328111	3.139819646	1.499685195	-1.240845236	4.03225552	-2.740530431	2.532570324	5.273100755	0.733397	1	0.736282	0.439294	0.741576	0.308738	1	0.032135	0.651623	1	0.988418	1	0.70123
D3Z6F5;Q03265;Q831A3 [ATP synthase subunit alpha;ATP synthase subunit al ...]	-1.754480422	-1.140774439	-1.64255346	-1.471020619	-1.491985768	-2.068751489	1.655688281	-0.647339279	0.613705982	0.111926962	0.283459803	0.262494654	-0.314271067	3.410168703	1.107141143	-0.501779021	-0.33024618	-0.351211329	-0.92797705	2.79646272	0.493435161	0.171532841	0.150567692	-0.426198029	3.298241741	0.995214181	-0.020965149	-0.59773087	3.1267089	0.823681341	-0.576765721	3.147674049	0.844646489	3.72443977	1.421412211	-2.303027559	0.993153	0.111761	1	0.746007	0.753355	0.425592	1.00E-06	0.005432	0.068827	0.967881	0.475461	0.503657	0.577071
D3Z6I8;E9Q7Q3;A0A0R4J1P2;P21107;D3YVR0;A2AIM5;S4R2U0;G5E8R0;E9Q453;G5E8R2;G5E8R1;E9Q456;E9Q455;E9Q452;Q8BSH3;Q8BP43;E9Q450;E9Q448;CON__Q3SX28;B7ZNL3;A2AIM4;E9Q454;F8WID5;P58774;P58771 [Tropomyosin alpha-3 chain ...]	1.268777001	2.225085915	-0.691098311	-0.450727024	-1.198900697	0.130303061	0.420230597	0.134438666	0.956308913	-1.959875312	-1.719504026	-2.467677699	-1.13847394	-0.848546405	-1.134338335	-2.916184225	-2.675812939	-3.423986612	-2.094782853	-1.804855318	-2.090647249	0.240371286	-0.507802387	0.821401372	1.111328907	0.825536977	-0.748173673	0.581030085	0.870957621	0.58516569	1.329203758	1.619131294	1.333339363	0.289927536	0.004135605	-0.285791931	1.00E-06	0	0.036991	1	3.30E-05	0.000525	0.004769	0.000447	0.000103	1.00E-06	1.00E-05	0	2.70E-05
D3Z789;D3Z6Z0;Q78ZM0;O70492 [Sorting nexin-3 ...]	-1.839043539	-1.839043539	-1.839043539	-1.839043539	-1.839043539	-1.783487983	1.839043539	-1.769599094	0	0	0	0	0.055555556	3.678087077	0.069444444	0	0	0	0.055555556	3.678087077	0.069444444	0	0	0.055555556	3.678087077	0.069444444	0	0.055555556	3.678087077	0.069444444	0.055555556	3.678087077	0.069444444	3.622531522	0.013888889	-3.608642633	1	1	1	1	1	1	1	1	1	1	1	1	0.999999
E9PUM5;E9Q8B6;E9Q8B5;Q61405 [ ...]	-0.088394377	-2.946154808	-1.662995371	-0.080472974	-1.704764605	-1.48031929	-1.67513063	-1.480417688	-2.85776043	-1.574600993	0.007921404	-1.616370228	-1.391924913	-1.586736252	-1.392023311	1.283159437	2.865681834	1.241390203	1.465835517	1.271024178	1.465737119	1.582522397	-0.041769234	0.18267608	-0.012135259	0.182577682	-1.624291631	-1.399846317	-1.594657656	-1.399944715	0.224445315	0.029633975	0.224346917	-0.19481134	-9.84E-05	0.194712941	0	0	0	0	0	0	0	0	0	0	1	0	0
E9PUZ8;P08607 [C4b-binding protein ...]	1.112792579	-0.921205767	-0.071368491	-0.921205767	-0.921205767	-0.865650211	-0.921205767	-0.851761323	-2.033998346	-1.18416107	-2.033998346	-2.033998346	-1.97844279	-2.033998346	-1.964553902	0.849837276	0	0	0.055555556	0	0.069444444	-0.849837276	-0.849837276	-0.794281721	-0.849837276	-0.780392832	0	0.055555556	0	0.069444444	0.055555556	0	0.069444444	-0.055555556	0.013888889	0.069444444	4.40E-05	0	8.00E-06	0	0	0	0	0	0	1.00E-06	0	0	0
E9PV24;CON__P02672 [Fibrinogen alpha chain;Fibrinopeptide A;Fibrinogen ...]	2.916976201	2.417328798	2.496434927	2.920843646	1.048912348	2.650702793	-3.298620902	2.234293824	-0.499647403	-0.420541274	0.003867445	-1.868063853	-0.266273408	-6.215597103	-0.682682377	0.079106129	0.503514848	-1.36841645	0.233373995	-5.715949699	-0.183034974	0.42440872	-1.447522578	0.154267866	-5.795055828	-0.262141103	-1.871931298	-0.270140853	-6.219464548	-0.686549823	1.601790445	-4.34753325	1.185381475	-5.949323695	-0.416408969	5.532914725	0.014244	4.10E-05	0.000211	0.014822	0	0.000525	0	1.00E-05	0.002883	0.008479	1	0	0.07543
E9PWE9;P48025 [Tyrosine-protein kinase;Tyrosine-protein kinase SY ...]	-0.045591697	0.48386706	-0.009658017	-0.010141021	-0.051427252	0.173018063	-0.021793276	0.172919665	0.529458757	0.035933679	0.035450675	-0.005835555	0.21860976	0.02379842	0.218511362	-0.493525078	-0.494008082	-0.535294312	-0.310848997	-0.505660337	-0.310947395	-0.000483004	-0.041769234	0.18267608	-0.012135259	0.182577682	-0.04128623	0.183159085	-0.011652255	0.183060687	0.224445315	0.029633975	0.224346917	-0.19481134	-9.84E-05	0.194712941	2.00E-06	0	0.001177	0.000808	1.00E-06	0	7.50E-05	0	0	0.000355	0.000398	0.503657	0
E9PWU4;Q60994 [Adiponectin ...]	0.112453013	0.059471433	0.926794684	-1.911635388	-1.952921618	-0.041014181	-1.923287643	-1.728574702	-0.05298158	0.814341671	-2.024088401	-2.065374632	-0.153467194	-2.035740656	-1.841027715	0.867323251	-1.971106821	-2.012393051	-0.100485613	-1.982759076	-1.788046135	-2.838430072	-2.879716302	-0.967808865	-2.850082327	-2.655369386	-0.04128623	1.870621208	-0.011652255	0.183060687	1.911907438	0.029633975	0.224346917	-1.882273463	-1.687560521	0.194712941	0	0	0	0	0	0	0	0	0.066833	0	0	0	0.118197
E9PYF1;Q8VCT3 [Aminopeptidase B ...]	-0.357597847	0.591752597	-0.088016215	-0.164472958	1.422389588	0.462786625	-0.093673245	0.43956429	0.949350444	0.269581633	0.19312489	1.779987435	0.820384473	0.263924602	0.797162138	-0.679768811	-0.756225554	0.830636992	-0.128965971	-0.685425842	-0.152188306	-0.076456743	1.510405803	0.55080284	-0.00565703	0.527580505	1.586862546	0.627259583	0.070799713	0.604037248	-0.959602963	-1.516062833	-0.982825298	-0.55645987	-0.023222335	0.533237535	0.763326	0.645487	1	1	0.122267	0.905032	1	0.924998	0.289229	0.967881	1	0.04309	0.399969
E9PZ00;Q8BFQ1;K3W4L3;J3QPG5;Q61207 [Prosaposin ...]	0.855868053	-0.378832444	1.090016321	0.898746777	0.083447525	0.694601438	-0.14406778	0.698737043	-1.234700497	0.234148267	0.042878724	-0.772420529	-0.161266615	-0.999935833	-0.15713101	1.468848764	1.277579221	0.462279968	1.073433882	0.234764664	1.077569487	-0.191269543	-1.006568796	-0.395414883	-1.234084101	-0.391279278	-0.815299253	-0.204145339	-1.042814558	-0.200009735	0.611153913	-0.227515305	0.615289518	-0.838669218	0.004135605	0.842804823	7.90E-05	0.001356	0.000146	0.012684	0.978195	0.000525	0.022549	0.000447	2.00E-06	0.157901	1	0.002615	0.220693
E9PZC3;Q923D2;E9PZC4;A0A0U1RPU7 [Flavin reductase (NADPH) ...]	-0.021018641	1.150323005	-0.006167799	1.764977795	-0.02758016	0.088174495	-0.012646028	0.100301014	1.171341646	0.014850842	1.785996436	-0.006561519	0.109193135	0.008372613	0.121319655	-1.156490804	0.61465479	-1.177903165	-1.062148511	-1.162969033	-1.050021991	1.771145594	-0.021412361	0.094342293	-0.006478229	0.106468813	-1.792557955	-1.6768033	-1.777623822	-1.66467678	0.115754655	0.014934133	0.127881175	-0.100820522	0.01212652	0.112947042	1	0.436863	1	0.29493	1	1	1	1	0.420511	1	0.282459	1	0.999999
E9PZF0;Q01768;Q5NC79 [Nucleoside diphosphate kinase;Nucleoside diphospha ...]	1.109044308	2.038647876	0.816800366	-0.686681281	0.956248396	0.300913841	-0.537755377	0.305049446	0.929603568	-0.292243942	-1.79572559	-0.152795913	-0.808130467	-1.646799685	-0.803994862	-1.22184751	-2.725329157	-1.08239948	-1.737734034	-2.576403252	-1.733598429	-1.503481647	0.13944803	-0.515886524	-1.354555742	-0.511750919	1.642929677	0.987595123	0.148925905	0.991730728	-0.655334554	-1.494003772	-0.651198949	-0.838669218	0.004135605	0.842804823	0.018562	3.40E-05	0.261344	0.000148	0.11564	0.372269	0.000309	0.380003	3.40E-05	0.024332	0	0.45734	2.80E-05
E9PZW0;E9Q557 [Desmoplakin ...]	-0.709043582	-2.854801754	-0.340495265	0.927193644	-0.995010234	1.268833921	-0.854684712	1.028971005	-2.145758173	0.368548317	1.636237226	-0.285966652	1.977877503	-0.14564113	1.738014587	2.51430649	3.781995399	1.859791521	4.123635676	2.000117043	3.883772759	1.267688909	-0.654514969	1.609329186	-0.514189447	1.369466269	-1.922203878	0.341640277	-1.781878356	0.101777361	2.263844155	0.140325522	2.023981239	-2.123518633	-0.239862917	1.883655717	2.00E-06	0	0.000391	0.896945	2.00E-06	0.26371	1.00E-06	0.799199	0	0.137918	2.00E-06	0.192169	6.80E-05
E9Q1Y9;CON__Q61726;Q9ERE2;P97861;Q6IMF0;CON__P78386;Q9Z2T6;CON__O43790;CON__Q6NT21;CON__P78385;CON__Q14533 [Keratin, type II cuticular Hb1;Keratin, type II cu ...]	1.257838266	-0.836002662	1.443833411	3.171772929	3.093947563	0.794235451	-2.395503532	1.080792274	-2.093840928	0.185995145	1.913934663	1.836109298	-0.463602815	-3.653341798	-0.177045992	2.279836073	4.007775591	3.929950225	1.630238113	-1.55950087	1.916794936	1.727939518	1.650114152	-0.64959796	-3.839336943	-0.363041137	-0.077825366	-2.377537478	-5.567276461	-2.090980655	-2.299712112	-5.489451095	-2.013155289	-3.189738983	0.286556823	3.476295806	0.001597	2.00E-06	0.075719	0.015476	0.024877	0.014787	0	0.049637	9.70E-05	0.96007	4.70E-05	4.90E-05	0.544921
E9Q1Z0 [ ...]	-1.323662141	-3.417578274	-0.92460521	-0.395347351	0.25781419	-0.933553691	0.620857819	-0.72554562	-2.093916133	0.399056931	0.92831479	1.581476331	0.39010845	1.94451996	0.598116521	2.492973064	3.022230923	3.675392464	2.484024583	4.038436093	2.692032653	0.529257859	1.1824194	-0.008948481	1.545463029	0.19905959	0.653161541	-0.53820634	1.01620517	-0.330198269	-1.191367881	0.363043629	-0.98335981	1.55441151	0.208008071	-1.34640344	0.107879	2.30E-05	0.770898	0.789633	0.043968	0.780118	0.007315	1	0.000257	0.546047	0.038757	0.001836	0.58104
E9Q3E1;F6QPV9;J3QMK6 [Aldehyde dehydrogenase ...]	-1.897478383	-2.912990411	-2.273361364	-2.273511319	-2.294773725	-2.17901907	2.254547537	-2.16689255	-1.015512029	-0.375882981	-0.376032936	-0.397295342	-0.281540688	4.15202592	-0.269414168	0.639629048	0.639479092	0.618216686	0.733971341	5.167537949	0.746097861	-0.000149955	-0.021412361	0.094342293	4.527908901	0.106468813	-0.021262406	0.094492249	4.528058856	0.106618769	0.115754655	4.549321262	0.127881175	4.433566608	0.01212652	-4.421440088	1	0.705798	1	1	1	1	0.002699	1	0.502755	0.995021	1	0.926966	0.999999
E9Q3W4;Q9QXS1;A0A3B2W7J8;A0A2I3BRT4;Q8R0W0 [Plectin ...]	-1.431122553	-2.402977497	-0.894539563	-1.060733315	-0.442783185	-0.073138192	0.62367185	-0.069002587	-0.971854944	0.536582989	0.370389238	0.988339367	1.357984361	2.054794403	1.362119966	1.508437933	1.342244182	1.960194312	2.329839305	3.026649347	2.33397491	-0.166193751	0.451756378	0.821401372	1.518211413	0.825536977	0.617950129	0.987595123	1.684405164	0.991730728	0.369644994	1.066455035	0.373780598	0.696810042	0.004135605	-0.692674437	1.00E-06	0	0.002239	6.90E-05	0.027731	1.00E-05	0	8.00E-06	2.70E-05	1.50E-05	0.00026	0	0
E9Q3X0;Q9EQK5 [Major vault protein ...]	-0.024573056	0.291887743	-0.003490218	-0.003823267	0.542264559	0.140399124	-0.009147249	0.142063095	0.316460799	0.021082837	0.020749789	0.566837615	0.16497218	0.015425807	0.166636151	-0.295377961	-0.29571101	0.250376816	-0.151488619	-0.301034992	-0.149824648	-0.000333049	0.545754777	0.143889343	-0.00565703	0.145553314	0.546087826	0.144222391	-0.005323982	0.145886362	-0.401865435	-0.551411808	-0.400201464	-0.149546373	0.001663971	0.151210344	1	0.97516	1	1	0.852396	1	1	1	0.936775	1	1	0.805002	0.999999
E9Q3Z4;Q3TRM8;E9Q8S8;D6RFA3;P52792 [Hexokinase;Hexokinase-3 ...]	0.121542756	1.109458226	-0.126799934	0.021644829	-0.63460232	0.694601438	-0.14406778	0.698737043	0.98791547	-0.24834269	-0.099897927	-0.756145076	0.573058682	-0.265610536	0.577194287	-1.236258159	-1.087813396	-1.744060546	-0.414856787	-1.253526006	-0.410721183	0.148444763	-0.507802387	0.821401372	-0.017267846	0.825536977	-0.656247149	0.672956609	-0.165712609	0.677092214	1.329203758	0.49053454	1.333339363	-0.838669218	0.004135605	0.842804823	1	0	0.002239	0.36067	1.00E-06	1.00E-05	0.001086	8.00E-06	1.00E-06	0.012106	0.551068	4.00E-06	4.10E-05
E9Q499;F2Z405;Q5I2A0 [Serine protease inhibitor A3G ...]	0.890668482	-1.530587072	2.004587118	-1.11258426	-0.931441658	-1.608739803	-1.35401312	-5.330526378	-2.421255554	1.113918636	-2.003252741	-1.822110139	-2.499408284	-2.244681601	-6.22119486	3.53517419	0.418002812	0.599145414	-0.078152731	0.176573952	-3.799939306	-3.117171378	-2.936028776	-3.613326921	-3.358600238	-7.335113496	0.181142602	-0.496155543	-0.24142886	-4.217942119	-0.677298145	-0.422571462	-4.399084721	0.254726683	-3.721786576	-3.976513259	0.156985	2.00E-06	0.050489	9.00E-06	1.20E-05	0.000803	4.00E-06	0	9.00E-06	0.002778	5.10E-05	8.00E-05	0.002492
E9Q604;G5E8F1;E9Q5K8;Q3U1U4;P05555;A0A0R4J1B4 [Integrin alpha-M ...]	1.186607869	3.304780346	-0.126799934	0.690914622	-0.63460232	0.694601438	-0.14406778	0.698737043	2.118172476	-1.313407803	-0.495693247	-1.82121019	-0.492006431	-1.330675649	-0.487870826	-3.431580279	-2.613865723	-3.939382666	-2.610178908	-3.448848126	-2.606043303	0.817714556	-0.507802387	0.821401372	-0.017267846	0.825536977	-1.325516942	0.003686816	-0.834982402	0.007822421	1.329203758	0.49053454	1.333339363	-0.838669218	0.004135605	0.842804823	0	0	0.000374	0.003355	0	1.00E-06	0.000127	1.00E-06	0	0	0.007975	0	1.70E-05
E9Q616;A0A494BBD5 [ ...]	-0.663382923	-0.25490719	-0.126799934	-0.292993685	0.754899816	0.694601438	-0.14406778	0.698737043	0.408475733	0.536582989	0.370389238	1.418282739	1.357984361	0.519315143	1.362119966	0.128107256	-0.038086495	1.009807006	0.949508628	0.11083941	0.953644233	-0.166193751	0.88169975	0.821401372	-0.017267846	0.825536977	1.047893501	0.987595123	0.148925905	0.991730728	-0.060298378	-0.898967596	-0.056162773	-0.838669218	0.004135605	0.842804823	0	0.006128	0.000374	7.00E-06	0.000558	1.00E-06	0.000127	1.00E-06	0.005857	1.00E-06	2.80E-05	1.00E-06	0
E9Q8I0;P06909;D6RGQ0;E9Q8H9;A0A0A6YWP4;A0A0A6YVP8 [Complement factor H ...]	0.128614293	-1.705036121	1.315345672	-0.09873546	-2.388277577	1.24396994	-2.159348506	1.001809893	-1.833650414	1.186731379	-0.227349753	-2.51689187	1.115355647	-2.287962799	0.8731956	3.020381793	1.606300662	-0.683241456	2.949006061	-0.454312385	2.706846014	-1.414081131	-3.703623249	-0.071375732	-3.474694178	-0.313535779	-2.289542118	1.3427054	-2.060613047	1.100545352	3.632247517	0.228929071	3.39008747	-3.403318446	-0.242160047	3.161158399	1.00E-06	0	0.002239	1.00E-06	0	0.001291	0	0.000107	3.00E-06	0.00019	0.31752	0	0.000329
E9QAY6;A0A0U1RP81;E9Q800;Q8CAQ8 [MICOS complex subunit Mic60 ...]	-1.341872403	-1.964319955	-1.320789566	-1.321122615	-1.341146439	-1.176900223	1.308152099	-1.175236252	-0.622447552	0.021082837	0.020749789	0.000725964	0.16497218	2.650024502	0.166636151	0.643530389	0.643197341	0.623173516	0.787419732	3.272472054	0.789083703	-0.000333049	-0.020356873	0.143889343	2.628941665	0.145553314	-0.020023824	0.144222391	2.629274714	0.145886362	0.164246216	2.649298538	0.165910187	2.485052322	0.001663971	-2.483388351	1	0.705798	1	1	1	1	0.048293	1	0.719489	1	1	1	0.999999
E9QK48;Q7TNG5 [Echinoderm microtubule-associated protein-like 2 ...]	-0.667124584	0.161332982	-0.646041746	-0.646374795	-0.666398619	-0.502152404	-0.651698777	-0.500488433	0.828457566	0.021082837	0.020749789	0.000725964	0.16497218	0.015425807	0.166636151	-0.807374729	-0.807707778	-0.827731602	-0.663485386	-0.813031759	-0.661821415	-0.000333049	-0.020356873	0.143889343	-0.00565703	0.145553314	-0.020023824	0.144222391	-0.005323982	0.145886362	0.164246216	0.014699843	0.165910187	-0.149546373	0.001663971	0.151210344	0.442013	0.847513	0.48519	0.451501	0.422334	0.571568	0.405979	0.55824	0.608646	1	1	1	0.999999
E9QN08;A0A0R4J1L2;Q91VK2;Q80T06;P57776;D3Z7N2;D3YY68;D3YUQ9;D3YZT9;F6ZFU0;A0A0R4J1E2 [Elongation factor 1-delta ...]	0.450320368	-0.487662075	-0.009658017	-0.010141021	1.278372204	0.173018063	-0.021793276	0.172919665	-0.937982443	-0.459978386	-0.46046139	0.828051836	-0.277302305	-0.472113645	-0.277400703	0.478004058	0.477521053	1.766034279	0.660680138	0.465868799	0.66058174	-0.000483004	1.288030222	0.18267608	-0.012135259	0.182577682	1.288513226	0.183159085	-0.011652255	0.183060687	-1.105354141	-1.300165481	-1.105452539	-0.19481134	-9.84E-05	0.194712941	2.00E-06	2.00E-06	0.001496	0.001045	0	0	0.000102	0	0	1.00E-06	1.00E-06	1.00E-06	4.50E-05
F6QYF8;Q11011;E9Q039 [Puromycin-sensitive aminopeptidase ...]	-0.045591697	0.84106564	-0.009658017	-0.010141021	-0.051427252	0.173018063	-0.021793276	0.172919665	0.886657337	0.035933679	0.035450675	-0.005835555	0.21860976	0.02379842	0.218511362	-0.850723658	-0.851206662	-0.892492892	-0.668047577	-0.862858917	-0.668145975	-0.000483004	-0.041769234	0.18267608	-0.012135259	0.182577682	-0.04128623	0.183159085	-0.011652255	0.183060687	0.224445315	0.029633975	0.224346917	-0.19481134	-9.84E-05	0.194712941	2.00E-06	0	0.001177	0.000808	1.00E-06	0	7.50E-05	0	0	0.000355	0.000398	0.503657	0
F6TVP2;Q60710;E9PYG9 [Deoxynucleoside triphosphate triphosphohydrolase S ...]	-0.663382923	1.518429837	-0.126799934	-0.292993685	-0.63460232	0.694601438	-0.14406778	0.698737043	2.18181276	0.536582989	0.370389238	0.028780603	1.357984361	0.519315143	1.362119966	-1.64522977	-1.811423521	-2.153032157	-0.823828399	-1.662497617	-0.819692794	-0.166193751	-0.507802387	0.821401372	-0.017267846	0.825536977	-0.341608635	0.987595123	0.148925905	0.991730728	1.329203758	0.49053454	1.333339363	-0.838669218	0.004135605	0.842804823	0	0	6.30E-05	1.00E-06	0	0	1.70E-05	0	0	0	3.00E-06	0.554981	0
F6UFG6;D3YYE1;D3Z7M9;O35381;Q9EST5;Q64G17 [Acidic leucine-rich nuclear phosphoprotein 32 fami ...]	1.068560843	-0.055645178	-0.009658017	0.943735226	0.690646896	0.173018063	-0.021793276	0.172919665	-1.124206021	-1.078218861	-0.124825617	-0.377913948	-0.89554278	-1.09035412	-0.895641178	0.045987161	0.999380404	0.746292073	0.228663241	0.033851902	0.228564843	0.953393244	0.700304913	0.18267608	-0.012135259	0.182577682	-0.253088331	-0.770717163	-0.965528503	-0.770815561	-0.517628832	-0.712440172	-0.51772723	-0.19481134	-9.84E-05	0.194712941	0	0.000832	0.004063	0	0	0	0.000336	0	0	0	0.07266	3.70E-05	0
F6W0I8;Q8K2J1;A0A0R4J0W4;Q8CI85 [Carbonic anhydrase 12 ...]	0	0	0	0	0	2.921418702	0	5.526092927	0	0	0	0	2.921418702	0	5.526092927	0	0	0	2.921418702	0	5.526092927	0	0	2.921418702	0	5.526092927	0	2.921418702	0	5.526092927	2.921418702	0	5.526092927	-2.921418702	2.604674225	5.526092927	1	1	1	1	1	1	1	1	1	1	1	1	0.999999
F6W322;B8JK33;B8JK32;Q9D0E1;A0A3Q4EH91 [Heterogeneous nuclear ribonucleoprotein M ...]	0.47256277	0.455766223	-0.006167799	-0.006317754	1.160302577	0.088174495	-0.012646028	0.100301014	-0.016796548	-0.478730569	-0.478880525	0.687739806	-0.384388276	-0.485208798	-0.372261756	-0.461934022	-0.462083977	0.704536354	-0.367591728	-0.46841225	-0.355465208	-0.000149955	1.166470375	0.094342293	-0.006478229	0.106468813	1.166620331	0.094492249	-0.006328273	0.106618769	-1.072128082	-1.172948604	-1.060001562	-0.100820522	0.01212652	0.112947042	0.948057	0.855597	1	1	0.458702	1	1	1	1	0.967881	0.961422	0.719322	0.978274
F6XVM5;A0A338P776;Q9DB20 [ATP synthase subunit O, mitochondrial ...]	-1.729447581	-2.239274443	-1.693513902	-1.693996906	-1.735283136	-1.510837821	1.662062608	-1.510936219	-0.509826862	0.035933679	0.035450675	-0.005835555	0.21860976	3.391510189	0.218511362	0.545760541	0.545277537	0.503991307	0.728436622	3.901337051	0.728338223	-0.000483004	-0.041769234	0.18267608	3.35557651	0.182577682	-0.04128623	0.183159085	3.356059514	0.183060687	0.224445315	3.397345744	0.224346917	3.172900429	-9.84E-05	-3.172998827	2.00E-06	0	0.001177	0.000808	1.00E-06	0	0	0	2.00E-06	0.000355	0.000398	0.503657	0
F6YHE5 [ ...]	0	0.790376632	1.534541184	0	0	0.055555556	0	0.069444444	0.790376632	1.534541184	0	0	0.055555556	0	0.069444444	0.744164551	-0.790376632	-0.790376632	-0.734821077	-0.790376632	-0.720932188	-1.534541184	-1.534541184	-1.478985628	-1.534541184	-1.465096739	0	0.055555556	0	0.069444444	0.055555556	0	0.069444444	-0.055555556	0.013888889	0.069444444	1	1	1	1	1	1	1	1	1	1	1	1	0.999999
F6ZKZ3;Q9R112;H3BLH2 [Sulfide:quinone oxidoreductase, mitochondrial ...]	-0.021018641	0.94634306	-0.006167799	-0.006317754	-0.02758016	0.088174495	-0.012646028	0.100301014	0.967361701	0.014850842	0.014700887	-0.006561519	0.109193135	0.008372613	0.121319655	-0.952510859	-0.952660814	-0.97392322	-0.858168566	-0.958989088	-0.846042046	-0.000149955	-0.021412361	0.094342293	-0.006478229	0.106468813	-0.021262406	0.094492249	-0.006328273	0.106618769	0.115754655	0.014934133	0.127881175	-0.100820522	0.01212652	0.112947042	1	0.549246	1	1	1	1	1	1	0.52783	1	1	1	0.999999
F6ZSB7;Q61753 [D-3-phosphoglycerate dehydrogenase ...]	-0.024573056	0.661565476	-0.003490218	-0.003823267	0.45879356	0.140399124	-0.009147249	0.142063095	0.686138531	0.021082837	0.020749789	0.483366616	0.16497218	0.015425807	0.166636151	-0.665055694	-0.665388743	-0.202771916	-0.521166351	-0.670712724	-0.51950238	-0.000333049	0.462283778	0.143889343	-0.00565703	0.145553314	0.462616827	0.144222391	-0.005323982	0.145886362	-0.318394436	-0.467940809	-0.316730465	-0.149546373	0.001663971	0.151210344	1	0.705798	1	1	0.915264	1	1	1	0.698722	1	1	0.866045	0.999999
F6ZTG3;E9Q197;Q9CPV4 [Glyoxalase domain-containing protein 4 ...]	0	0	0	1.963592529	3.072457799	0.055555556	0	0.069444444	0	0	1.963592529	3.072457799	0.055555556	0	0.069444444	0	1.963592529	3.072457799	0.055555556	0	0.069444444	1.963592529	3.072457799	0.055555556	0	0.069444444	1.10886527	-1.908036973	-1.963592529	-1.894148085	-3.016902243	-3.072457799	-3.003013354	-0.055555556	0.013888889	0.069444444	1	1	1	1	1	1	1	1	1	1	1	1	0.999999
F7BP55;Q9WTP6 [Adenylate kinase 2, mitochondrial;Adenylate kinase ...]	-0.021018641	0.95841817	-0.006167799	0.566495358	-0.02758016	0.088174495	-0.012646028	0.100301014	0.979436811	0.014850842	0.587513999	-0.006561519	0.109193135	0.008372613	0.121319655	-0.964585969	-0.391922812	-0.98599833	-0.870243676	-0.971064198	-0.858117156	0.572663157	-0.021412361	0.094342293	-0.006478229	0.106468813	-0.594075518	-0.478320864	-0.579141386	-0.466194344	0.115754655	0.014934133	0.127881175	-0.100820522	0.01212652	0.112947042	1	0.544436	1	0.902128	1	1	1	1	0.523826	1	0.855116	1	0.999999
F7C106;A0A0A6YVR0;Q9D881;P19536 [Cytochrome c oxidase subunit 5B, mitochondrial ...]	0.973631037	0	0	0	1.337310992	0.055555556	0	0.069444444	-0.973631037	-0.973631037	-0.973631037	0.363679955	-0.918075481	-0.973631037	-0.904186593	0	0	1.337310992	0.055555556	0	0.069444444	0	1.337310992	0.055555556	0	0.069444444	1.337310992	0.055555556	0	0.069444444	-1.281755436	-1.337310992	-1.267866547	-0.055555556	0.013888889	0.069444444	1	1	1	1	1	1	1	1	1	1	1	1	0.999999
F7CAZ6;A2AMW0;P47757;A0A0A0MQI9;F6YHZ8 [F-actin-capping protein subunit beta ...]	1.788765643	1.836755492	-0.009658017	-0.010141021	-0.051427252	0.173018063	-0.021793276	0.172919665	0.047989849	-1.79842366	-1.798906664	-1.840192894	-1.61574758	-1.810558919	-1.615845978	-1.846413509	-1.846896513	-1.888182743	-1.663737429	-1.858548768	-1.663835827	-0.000483004	-0.041769234	0.18267608	-0.012135259	0.182577682	-0.04128623	0.183159085	-0.011652255	0.183060687	0.224445315	0.029633975	0.224346917	-0.19481134	-9.84E-05	0.194712941	0	0	0.001496	0.001045	1.00E-06	0	0.000102	0	0.253432	0	0	0	0
F8WGL3;P18760;A0A494B9A7 [Cofilin-1 ...]	1.295233023	3.049535741	0.107445686	0.565959388	1.319388084	-0.956630957	1.474456925	1.295233023	1.754302717	-1.187787337	-0.729273635	0.024155061	-2.25186398	0.179223902	0	-2.942090054	-2.483576353	-1.730147657	-4.006166698	-1.575078815	-1.754302717	0.458513702	1.211942398	-1.064076643	1.367011239	1.187787337	0.753428696	-1.522590345	0.908497537	0.729273635	-2.276019041	0.155068841	-0.024155061	2.431087882	2.25186398	-0.179223902	0.001416	3.10E-05	0.036991	0.009293	0.00134	0.766865	0.000825	0.001326	0.00247	0.023312	0.156472	1	0.005439
F8WIR1;P18242;F6Y6L6;A0A1B0GT66 [Cathepsin D ...]	-2.238169596	-1.553526407	-1.533254034	-2.025454573	-1.225248468	-1.481959948	1.814605013	-1.454700407	0.68464319	0.704915563	0.212715024	1.012921128	0.756209648	4.052774609	0.78346919	0.020272373	-0.471928166	0.328277939	0.071566459	3.36813142	0.098826	-0.492200539	0.308005565	0.051294085	3.347859046	0.078553627	0.800206105	0.543494625	3.840059586	0.570754166	-0.25671148	3.039853481	-0.229451938	3.296564961	0.027259542	-3.269305419	0.751022	0.842291	1	1	0.518054	0.905032	0.000284	0.889912	0.414589	0.440958	1	0.199755	0.388671
F8WIT2;P14824 [Annexin;Annexin A6 ...]	-0.43411353	0.795383553	-0.126799934	-0.292993685	-0.63460232	0.694601438	-0.14406778	0.698737043	1.229497083	0.307313597	0.141119845	-0.20048879	1.128714968	0.29004575	1.132850573	-0.922183487	-1.088377238	-1.429985873	-0.100782115	-0.939451333	-0.09664651	-0.166193751	-0.507802387	0.821401372	-0.017267846	0.825536977	-0.341608635	0.987595123	0.148925905	0.991730728	1.329203758	0.49053454	1.333339363	-0.838669218	0.004135605	0.842804823	2.50E-05	0	0.000374	7.00E-06	0	1.00E-06	0.000127	1.00E-06	0	0.002438	0.112848	0.025903	0
F8WIV2;Q60854;E9PYY0;E9Q3Y1;E9Q6X2;E9Q108;E9Q0P9;K7E6F1;E9PZQ9;E9Q4R2 [Serpin B6 ...]	-1.687594673	-3.066229821	-1.384659637	-1.474879649	-0.504420218	-0.931385025	1.264030089	-0.904125483	-1.378635148	0.302935036	0.212715024	1.183174455	0.756209648	2.951624762	0.78346919	1.681570184	1.591350172	2.561809604	2.134844797	4.330259911	2.162104338	-0.090220012	0.88023942	0.453274612	2.648689726	0.480534154	0.970459432	0.543494625	2.738909739	0.570754166	-0.426964807	1.768450307	-0.399705266	2.195415114	0.027259542	-2.168155573	0.822881	0.053634	1	1	0.550712	0.959886	0.010719	0.924998	0.144396	0.967881	1	0.279109	0.505032
F8WJ05;Q61702 [Inter-alpha-trypsin inhibitor heavy chain H1 ...]	0.396599386	-0.214456532	1.005659152	-0.664167892	-1.005776527	0.323427231	-0.515241987	0.327562836	-0.611055918	0.609059766	-1.060767277	-1.402375913	-0.073172155	-0.911841373	-0.06903655	1.220115684	-0.44971136	-0.791319995	0.537883763	-0.300785455	0.542019368	-1.669827043	-2.011435679	-0.68223192	-1.520901139	-0.678096316	-0.341608635	0.987595123	0.148925905	0.991730728	1.329203758	0.49053454	1.333339363	-0.838669218	0.004135605	0.842804823	0.646681	0.000648	0.019361	2.40E-05	2.00E-06	0.327935	5.90E-05	0.334691	2.30E-05	0.000324	0	0	0.507676
G3UWN9;G3UXY0;G3UXZ5;P97371;G3X9K9 [Proteasome activator complex subunit 1 ...]	0.598192923	1.321682962	-0.009658017	-0.010141021	-0.051427252	0.173018063	-0.021793276	0.172919665	0.723490039	-0.60785094	-0.608333944	-0.649620174	-0.425174859	-0.619986199	-0.425273257	-1.331340979	-1.331823983	-1.373110213	-1.148664898	-1.343476238	-1.148763296	-0.000483004	-0.041769234	0.18267608	-0.012135259	0.182577682	-0.04128623	0.183159085	-0.011652255	0.183060687	0.224445315	0.029633975	0.224346917	-0.19481134	-9.84E-05	0.194712941	0	0	0.001496	0.001045	1.00E-06	0	0.000102	0	0	0	0	0	4.00E-06
G3UX26;Q60930;D3YZT5;A0A286YCR8;D3YUN8 [Voltage-dependent anion-selective channel protein ...]	0.523823273	0.002271337	-0.579596352	-0.656053095	-0.509303645	-0.028793512	0.397906893	-0.052015847	-0.521551937	-1.103419626	-1.179876369	-1.033126918	-0.552616786	-0.125916381	-0.575839121	-0.581867689	-0.658324432	-0.511574982	-0.031064849	0.395635556	-0.054287184	-0.076456743	0.070292707	0.55080284	0.977503245	0.527580505	0.14674945	0.627259583	1.053959988	0.604037248	0.480510133	0.907210538	0.457287798	0.426700405	-0.023222335	-0.44992274	0.433382	0.794096	1	1	1	0.959886	0.482392	0.973907	0.698722	0.313249	0.270406	0.341036	0.725128
G3UY11;G5E8J2;B7ZW98;E9QNT8;G8JL84;D3YTV8;D3Z5M4;Q0VGY9;A0A0R4J1N7;Q02357;D6RJ51;F7D1P5 [Ankyrin-1 ...]	-0.351376772	-1.174535003	-0.048441736	1.497371023	-0.333345333	0.404832876	-0.072187811	0.432092418	-0.823158231	0.302935036	1.848747796	0.018031439	0.756209648	0.279188961	0.78346919	1.126093267	2.671906027	0.84118967	1.57936788	1.102347192	1.606627421	1.54581276	-0.284903597	0.453274612	-0.023746075	0.480534154	-1.830716357	-1.092538147	-1.569558835	-1.065278606	0.738178209	0.261157522	0.765437751	-0.477020687	0.027259542	0.504280229	0.822881	0.183429	1	0.134194	0.817726	0.959886	1	0.924998	0.422013	0.967881	0.056223	1	0.505032
G3UY13;E9Q6I2;Q61730 [Interleukin-1 receptor accessory protein ...]	3.224664003	0	0	0	0	0.055555556	0	0.069444444	-3.224664003	-3.224664003	-3.224664003	-3.224664003	-3.169108447	-3.224664003	-3.155219558	0	0	0	0.055555556	0	0.069444444	0	0	0.055555556	0	0.069444444	0	0.055555556	0	0.069444444	0.055555556	0	0.069444444	-0.055555556	0.013888889	0.069444444	1	1	1	1	1	1	1	1	1	1	1	1	0.999999
G3UY29;E9Q3P9;F8WGS1;P62492;P46638;G3UZD3;G3UZL4;D3YYB3 [Ras-related protein Rab-11A;Ras-related protein Ra ...]	-1.131887565	-0.678882297	-1.53999042	-1.133624936	0.243611221	-0.718589049	1.269122707	-0.714453444	0.453005268	-0.408102855	-0.001737371	1.375498786	0.413298516	2.401010272	0.417434121	-0.861108124	-0.454742639	0.922493517	-0.039706752	1.948005003	-0.035571147	0.406365484	1.783601641	0.821401372	2.809113127	0.825536977	1.377236157	0.415035887	2.402747643	0.419171492	-0.962200269	1.025511486	-0.958064664	1.987711755	0.004135605	-1.98357615	0.303068	0.002375	0.036991	0.655538	6.00E-06	0.000525	3.00E-06	0.000447	0.012638	0.003917	1	1.40E-05	0.003567
G3UYI4;G3UYL3;Q8BG32 [26S proteasome non-ATPase regulatory subunit 11 ...]	-2.525334575	-2.525334575	-0.893774025	-2.525334575	1.377992704	-2.469779019	2.525334575	0.036352014	0	1.63156055	0	3.903327279	0.055555556	5.05066915	2.561686589	1.63156055	0	3.903327279	0.055555556	5.05066915	2.561686589	-1.63156055	2.271766729	-1.576004994	3.4191086	0.930126039	3.903327279	0.055555556	5.05066915	2.561686589	-3.847771723	1.147341871	-1.34164069	4.995113594	2.506131033	-2.488982561	1	1	6.10E-05	1	0	0.596165	0	3.00E-06	1	2.80E-05	1	0	0.544921
G3UYL6;G3UX05;Q99L20;G3UYJ7 [ ...]	-2.030254646	-2.030254646	-2.030254646	-2.030254646	-2.030254646	-1.974699091	2.030254646	-1.960810202	0	0	0	0	0.055555556	4.060509292	0.069444444	0	0	0	0.055555556	4.060509292	0.069444444	0	0	0.055555556	4.060509292	0.069444444	0	0.055555556	4.060509292	0.069444444	0.055555556	4.060509292	0.069444444	4.004953737	0.013888889	-3.991064848	1	1	1	1	1	1	1	1	1	1	1	1	0.999999
G3UYV7;P62858 [40S ribosomal protein S28 ...]	0.062932525	-0.785735369	1.034564821	-0.633754829	1.649766289	-1.915510266	1.971065821	-1.901621377	-0.848667894	0.971632296	-0.696687354	1.586833764	-1.97844279	1.908133296	-1.964553902	1.82030019	0.15198054	2.435501657	-1.129774897	2.75680119	-1.115886008	-1.66831965	0.615201468	-2.950075086	0.936501	-2.936186198	2.283521118	-1.281755436	2.60482065	-1.267866547	-3.565276554	0.321299533	-3.551387665	3.886576087	0.013888889	-3.872687198	0	4.00E-06	0	0.000808	0	0.94223	0	0.865964	7.20E-05	2.20E-05	0.035426	0	0
G3X8T9;Q91WP6;H7BWY0;Q6P4P1 [Serine protease inhibitor A3N ...]	0.904608126	-1.350691325	1.932336285	-1.108371044	-0.909250069	-0.809335186	-1.346744803	-4.554245698	-2.25529945	1.027728159	-2.01297917	-1.813858195	-1.713943312	-2.251352929	-5.458853824	3.28302761	0.24232028	0.441441256	0.541356138	0.003946522	-3.203554374	-3.040707329	-2.841586354	-2.741671471	-3.279081088	-6.486581983	0.199120975	0.299035858	-0.238373759	-3.445874654	0.099914883	-0.437494734	-3.64499563	-0.537409617	-3.744910512	-3.207500896	0.282472	1.30E-05	0.144371	4.10E-05	5.80E-05	0.004993	1.70E-05	1.00E-06	6.60E-05	0.012975	0.000193	0.000331	0.017972
G3X920;Q9DBR3 [Armadillo repeat-containing protein 8 ...]	0	2.72740526	0	0	0	0.055555556	0	0.069444444	2.72740526	0	0	0	0.055555556	0	0.069444444	-2.72740526	-2.72740526	-2.72740526	-2.671849705	-2.72740526	-2.657960816	0	0	0.055555556	0	0.069444444	0	0.055555556	0	0.069444444	0.055555556	0	0.069444444	-0.055555556	0.013888889	0.069444444	1	1	1	1	1	1	1	1	1	1	1	1	0.999999
G3X977;Q61703;Q3UEG7;CON__Q9TRI1 [Inter-alpha-trypsin inhibitor heavy chain H2 ...]	0.229452969	0.726447458	0.372956936	-0.586383548	-0.774594829	0.040876034	-0.515583836	0.0176537	0.49699449	0.143503967	-0.815836517	-1.004047798	-0.188576934	-0.745036805	-0.211799269	-0.353490522	-1.312831007	-1.501042288	-0.685571424	-1.242031294	-0.708793759	-0.959340484	-1.147551765	-0.332080902	-0.888540772	-0.355303236	-0.188211281	0.627259583	0.070799713	0.604037248	0.815470864	0.259010994	0.792248529	-0.55645987	-0.023222335	0.533237535	1	0.992649	1	0.359302	0.251461	0.905032	0.367086	0.902997	0.712111	1	0.495811	0.348259	0.999999
G3X9D9;P48997 [Involucrin ...]	-3.723949536	-5.672035597	-2.106702997	-1.75245169	0.853375928	-2.833249336	2.547545994	0.087682149	-1.948086061	1.617246539	1.971497846	4.577325465	0.8907002	6.27149553	3.811631685	3.5653326	3.919583907	6.525411525	2.838786261	8.219581591	5.759717746	0.354251307	2.960078925	-0.726546339	4.654248991	2.194385146	2.605827619	-1.080797646	4.299997684	1.840133839	-3.686625265	1.694170065	-0.76569378	5.38079533	2.920931485	-2.459863845	0.001189	0	0.099733	0.005801	0	0.328969	0	1.00E-06	2.00E-06	9.00E-06	2.00E-06	0	0.000667
G3X9T8;G3X8Q5;E9PZD8;Q61147;G3UXG1;G3UWP5;G3UZ53 [Ceruloplasmin ...]	1.053469199	1.356655265	1.654208828	-0.159356866	-1.840192485	-1.238103576	-2.076772794	-0.038031917	0.303186066	0.600739629	-1.212826064	-2.893661683	-2.291572775	-3.130241993	-1.091501116	0.297553563	-1.51601213	-3.196847749	-2.594758841	-3.433428059	-1.394687182	-1.813565694	-3.494401312	-2.892312404	-3.730981622	-1.692240745	-1.680835619	-1.07874671	-1.917415928	0.121324949	0.602088909	-0.236580309	1.802160568	-0.838669218	1.200071659	2.038740877	4.00E-06	7.10E-05	0.008965	0	0	0	0	8.00E-06	0.022322	0.000884	2.00E-06	0	0
G3X9V0;P97372 [Proteasome activator complex subunit 2 ...]	-0.021018641	1.194343749	-0.006167799	-0.006317754	1.187687088	0.088174495	-0.012646028	0.100301014	1.21536239	0.014850842	0.014700887	1.208705728	0.109193135	0.008372613	0.121319655	-1.200511548	-1.200661503	-0.006656661	-1.106169254	-1.206989776	-1.094042735	-0.000149955	1.193854886	0.094342293	-0.006478229	0.106468813	1.194004842	0.094492249	-0.006328273	0.106618769	-1.099512593	-1.200333115	-1.087386073	-0.100820522	0.01212652	0.112947042	1	0.414972	1	1	0.428668	1	1	1	0.405854	1	1	0.408825	0.999999
G5DDB7;Q8R3B1 [Phosphoinositide phospholipase C;1-phosphatidylino ...]	-1.563646754	-1.563646754	-1.563646754	-1.563646754	-1.563646754	-1.508091199	1.563646754	-1.49420231	0	0	0	0	0.055555556	3.127293509	0.069444444	0	0	0	0.055555556	3.127293509	0.069444444	0	0	0.055555556	3.127293509	0.069444444	0	0.055555556	3.127293509	0.069444444	0.055555556	3.127293509	0.069444444	3.071737953	0.013888889	-3.057849064	1	1	1	1	1	1	1	1	1	1	1	1	0.999999
G5E839;P80315 [T-complex protein 1 subunit delta ...]	-0.663382923	-0.305248451	-0.126799934	-0.292993685	0.57483129	0.694601438	-0.14406778	0.698737043	0.358134472	0.536582989	0.370389238	1.238214213	1.357984361	0.519315143	1.362119966	0.178448517	0.012254766	0.880079741	0.999849889	0.161180671	1.003985494	-0.166193751	0.701631223	0.821401372	-0.017267846	0.825536977	0.867824974	0.987595123	0.148925905	0.991730728	0.119770148	-0.71889907	0.123905753	-0.838669218	0.004135605	0.842804823	0	0.000224	0.000374	7.00E-06	0.002336	1.00E-06	0.000127	1.00E-06	0.001278	1.00E-06	2.80E-05	1.00E-06	0
G5E850;P56395;E0CY88 [Cytochrome b5 ...]	-2.112089898	-2.098988661	-2.076156219	-2.076639223	-2.117925453	-1.893480138	2.044704925	-1.893578537	0.013101237	0.035933679	0.035450675	-0.005835555	0.21860976	4.156794824	0.218511362	0.022832442	0.022349438	-0.018936792	0.205508523	4.143693586	0.205410125	-0.000483004	-0.041769234	0.18267608	4.120861144	0.182577682	-0.04128623	0.183159085	4.121344148	0.183060687	0.224445315	4.162630379	0.224346917	3.938185064	-9.84E-05	-3.938283462	2.00E-06	0.497513	0.001177	0.000808	1.00E-06	0	0	0	0.981677	0.000355	0.000398	0.503657	0
G5E902;Q8VEM8 [Phosphate carrier protein, mitochondrial ...]	-1.006639645	-1.402012479	-0.470056656	1.236880774	-0.977859042	0.351344716	0.199188942	0.355480321	-0.395372834	0.536582989	2.243520418	0.028780603	1.357984361	1.205828587	1.362119966	0.931955824	2.638893253	0.424153437	1.753357195	1.601201421	1.7574928	1.706937429	-0.507802387	0.821401372	0.669245597	0.825536977	-2.214739816	-0.885536057	-1.037691832	-0.881400453	1.329203758	1.177047984	1.333339363	-0.152155774	0.004135605	0.156291379	0	0	0.000374	0	0	1.00E-06	0.008453	1.00E-06	1.30E-05	1.00E-06	0	0.70391	0
H3BJP2;H3BK43;H3BLJ9;H3BJL6;H3BKH6;Q9R0P3 [S-formylglutathione hydrolase ...]	-0.824455448	-0.131956266	-0.824455448	-0.824455448	0.447812499	-0.768899892	0.824455448	-0.755011003	0.692499182	0	0	1.272267947	0.055555556	1.648910896	0.069444444	-0.692499182	-0.692499182	0.579768765	-0.636943627	0.956411713	-0.623054738	0	1.272267947	0.055555556	1.648910896	0.069444444	1.272267947	0.055555556	1.648910896	0.069444444	-1.216712391	0.376642949	-1.202823503	1.59335534	0.013888889	-1.579466451	1	0.000888	1	1	8.30E-05	0.643403	3.40E-05	0.481152	0.000998	1	1	9.10E-05	0.587105
H3BJQ7;P99029;A0A494BAZ4;G3UZJ4 [Peroxiredoxin-5, mitochondrial ...]	1.392374528	4.0809333	-1.139573317	1.256916105	0.946810815	-0.638520651	1.234940594	-0.350756381	2.688558772	-2.531947844	-0.135458423	-0.445563713	-2.030895179	-0.157433934	-1.743130909	-5.220506616	-2.824017195	-3.134122485	-4.719453951	-2.845992706	-4.431689681	2.396489421	2.086384131	0.501052666	2.374513911	0.788816935	-0.31010529	-1.895436756	-0.021975511	-1.607672486	-1.585331466	0.288129779	-1.297567196	1.873461245	0.28776427	-1.585696975	7.30E-05	0	1	0.000115	0.000251	0.357527	0.000105	0.159559	2.00E-06	5.00E-06	0.846301	0.146977	0.000493
H3BK03;P52430;H3BLB8 [Serum paraoxonase/arylesterase 1 ...]	0.540437888	0.400547204	-0.539273434	-0.629343491	-0.802764669	-0.124785559	-0.55654128	-0.095763649	-0.139890684	-1.079711322	-1.169781379	-1.343202557	-0.665223447	-1.096979168	-0.636201537	-0.939820638	-1.029890695	-1.203311874	-0.525332764	-0.957088484	-0.496310853	-0.090070057	-0.263491236	0.414487875	-0.017267846	0.443509785	-0.173421179	0.504557932	0.072802211	0.533579842	0.67797911	0.246223389	0.707001021	-0.431755721	0.029021911	0.460777631	1	1	0.87212	0.784559	0.668549	0.99977	0.752025	1	1	0.813394	0.765882	0.636158	0.964493
H3BKI8;A0A286YDM3;H3BK96;H3BKD0;B2M1R6;P61979;A0A286YCM2;H3BLL4;A0A286YEC4;A0A286YE41;H3BJ43;H3BJS9;Q8BT23;A0A286YDH1 [Heterogeneous nuclear ribonucleoprotein K ...]	-0.308735302	0.798130949	-0.502138404	-1.028988908	-0.322503346	-0.041393785	0.591927443	-0.03725818	1.106866252	-0.193403102	-0.720253605	-0.013768044	0.267341517	0.900662745	0.271477122	-1.300269353	-1.827119857	-1.120634296	-0.839524734	-0.206203506	-0.835389129	-0.526850504	0.179635058	0.460744619	1.094065847	0.464880224	0.706485562	0.987595123	1.620916351	0.991730728	0.281109561	0.914430789	0.285245166	0.633321228	0.004135605	-0.629185623	0.108212	0	0.811375	0.002766	0.046846	0.000601	2.00E-06	0.000516	3.50E-05	0.40477	0.000883	1	0.136657
H3BKL7;E9Q797;P49183;D3YXC7 [Deoxyribonuclease-1 ...]	2.486052042	-1.563055479	-0.923426432	2.078813181	1.16841217	-0.829084138	-0.92990466	-0.816957618	-4.049107521	-3.409478474	-0.407238861	-1.317639872	-3.31513618	-3.415956702	-3.30300966	0.639629048	3.64186866	2.731467649	0.733971341	0.633150819	0.746097861	3.002239613	2.091838602	0.094342293	-0.006478229	0.106468813	-0.910401011	-2.907897319	-3.008717841	-2.895770799	-1.997496308	-2.098316831	-1.985369789	-0.100820522	0.01212652	0.112947042	0.264336	0.057037	0.179488	0.457576	1	0.209895	0.151364	0.207604	0.005535	0.015138	1	0.350263	0.017652
H7BWY6;Q00724;A0A494B9P3;A0A494B9T2 [Retinol-binding protein 4 ...]	-0.230005187	-1.646986952	0.888875386	-0.458498791	-1.759689974	-1.643935319	-1.744755841	-1.631808799	-1.416981764	1.118880574	-0.228493603	-1.529684787	-1.413930132	-1.514750654	-1.401803612	2.535862338	1.188488161	-0.112703022	0.003051632	-0.09776889	0.015178152	-1.347374177	-2.64856536	-2.532810706	-2.633631228	-2.520684186	-1.301191183	-1.185436529	-1.286257051	-1.173310009	0.115754655	0.014934133	0.127881175	-0.100820522	0.01212652	0.112947042	0.132787	0.012085	0.681665	0.09211	0.010814	0.014224	0.010495	0.013831	0.293833	0.460954	1	0.255315	0.324676
H7BX22;P34022 [Ran-specific GTPase-activating protein ...]	1.001474215	1.338428153	0	1.398407639	1.150602073	0.055555556	0	0.069444444	0.336953937	-1.001474215	0.396933424	0.149127857	-0.94591866	-1.001474215	-0.932029771	-1.338428153	0.059979486	-0.18782608	-1.282872597	-1.338428153	-1.268983708	1.398407639	1.150602073	0.055555556	0	0.069444444	-0.247805567	-1.342852084	-1.398407639	-1.328963195	-1.095046517	-1.150602073	-1.081157628	-0.055555556	0.013888889	0.069444444	0.000249	0	1	7.10E-05	0.000124	0.643403	1	0.481152	0.099272	0.000289	0.209596	0.705552	0.00038
H7C7A0 [ ...]	-0.351376772	-1.730011921	3.592159441	1.486379726	-0.333345333	0.404832876	-0.072187811	0.432092418	-1.378635148	3.943536213	1.837756498	0.018031439	0.756209648	0.279188961	0.78346919	5.322171361	3.216391646	1.396666587	2.134844797	1.657824109	2.162104338	-2.105779715	-3.925504774	-3.187326565	-3.664347252	-3.160067023	-1.819725059	-1.08154685	-1.558567537	-1.054287308	0.738178209	0.261157522	0.765437751	-0.477020687	0.027259542	0.504280229	0.752401	0.022223	0.000635	0.07127	0.741576	0.905032	1	0.890793	0.075201	0.00021	0.023816	1	0.39108
I7HLV2;Q6ZWV3;P86048;A0A1B0GXC3 [60S ribosomal protein L10;60S ribosomal protein L1 ...]	-0.330358131	0.517889707	-0.042273937	0.264922092	-0.305765173	0.372213937	-0.059541784	0.401235848	0.848247838	0.288084194	0.595280223	0.024592958	0.702572068	0.270816348	0.731593979	-0.560163644	-0.252967615	-0.82365488	-0.14567577	-0.577431491	-0.116653859	0.307196029	-0.263491236	0.414487875	-0.017267846	0.443509785	-0.570687265	0.107291845	-0.324463876	0.136313756	0.67797911	0.246223389	0.707001021	-0.431755721	0.029021911	0.460777631	1	0.984872	1	1	1	1	1	1	0.804037	1	1	1	0.955981
I7HPY0;Q91VW3 [SH3 domain-binding glutamic acid-rich-like protein ...]	1.861225592	1.000368609	2.509246814	2.999149507	2.625043191	3.257601148	-0.0298082	4.081399514	-0.860856984	0.648021222	1.137923915	0.763817598	1.396375556	-1.891033792	2.220173922	1.508878205	1.998780898	1.624674582	2.257232539	-1.030176808	3.081030905	0.489902693	0.115796377	0.748354334	-2.539055013	1.5721527	-0.374106317	0.258451641	-3.028957707	1.082250007	0.632557957	-2.65485139	1.456356323	-3.287409347	0.823798366	4.111207714	0.001403	0.046347	0.000309	4.70E-05	1.00E-04	2.80E-05	1	3.00E-06	0.001234	0.003917	9.10E-05	0.00127	4.40E-05
J3QP71;K3W4Q8;P18572 [Basigin ...]	-0.333024792	-0.162717756	-0.084525996	1.496420458	-0.328837147	0.377943056	-0.084525996	0.36694564	0.170307035	0.248498795	1.82944525	0.004187645	0.710967848	0.248498795	0.699970431	0.07819176	1.659138214	-0.166119391	0.540660813	0.07819176	0.529663396	1.580946454	-0.244311151	0.462469053	0	0.451471636	-1.825257605	-1.118477402	-1.580946454	-1.129474818	0.706780204	0.244311151	0.695782787	-0.462469053	-0.010997417	0.451471636	1	1	1	0.66163	1	1	1	1	1	1	0.484414	1	0.948245
K3W4R2;Q6URW6;A0A140LHX1 [Myosin-14 ...]	-0.186489145	0.91759485	-0.126799934	-0.292993685	-0.127003106	0.694601438	-0.14406778	0.698737043	1.104083995	0.059689212	-0.106504539	0.05948604	0.881090583	0.042421365	0.885226188	-1.044394784	-1.210588535	-1.044597956	-0.222993412	-1.06166263	-0.218857807	-0.166193751	-0.000203172	0.821401372	-0.017267846	0.825536977	0.165990579	0.987595123	0.148925905	0.991730728	0.821604544	-0.017064674	0.825740149	-0.838669218	0.004135605	0.842804823	0.024105	0	0.002239	6.90E-05	0.057623	1.00E-05	0.001086	8.00E-06	7.00E-06	0.883543	0.542227	0.904117	3.80E-05
K9J7B2;Q64435;D3YZE6;D3Z7G0;D3YZ96;G3UZC9;B2RT14;E9PXN7;D3Z748;Q62452;P70691;Q63886;D6RH94;D3YWN0;D3YUP6;Q8BJL9;Q91WH2;Q8VCN3;Q8K169;Q3UEP4;P17717 [UDP-glucuronosyltransferase 1-6;UDP-glucuronosyltr ...]	-1.555214728	-4.127134212	-1.700033243	-2.275943074	-1.037701509	-1.288347951	1.838881609	-1.284212346	-2.571919484	-0.144818515	-0.720728346	0.517513219	0.266866777	3.394096337	0.271002382	2.427100969	1.851191138	3.089432703	2.838786261	5.966015821	2.842921866	-0.575909831	0.662331734	0.411685292	3.538914852	0.415820897	1.238241565	0.987595123	4.114824683	0.991730728	-0.250646442	2.876583118	-0.246510837	3.12722956	0.004135605	-3.123093955	0.027533	0	0.546688	0.002433	2.70E-05	0.000525	0	0.000447	0	0.482756	8.70E-05	0.000769	0.038171
M0QWU8;P31786 [Acyl-CoA-binding protein ...]	-0.102191593	-1.903937931	0.652403686	-3.267701182	-3.267701182	-3.212145626	3.267701182	-3.198256738	-1.801746338	0.754595279	-3.165509589	-3.165509589	-3.109954034	3.369892775	-3.096065145	2.556341617	-1.363763251	-1.363763251	-1.308207696	5.171639113	-1.294318807	-3.920104868	-3.920104868	-3.864549312	2.615297496	-3.850660423	0	0.055555556	6.535402364	0.069444444	0.055555556	6.535402364	0.069444444	6.479846809	0.013888889	-6.46595792	0	2.00E-06	0	1	1	0.186099	0	0.063532	0	1.00E-06	0	0	0
O08439 [ ...]	0	0	3.260044538	0	0	0.055555556	0	0.069444444	0	3.260044538	0	0	0.055555556	0	0.069444444	3.260044538	0	0	0.055555556	0	0.069444444	-3.260044538	-3.260044538	-3.204488982	-3.260044538	-3.190600093	0	0.055555556	0	0.069444444	0.055555556	0	0.069444444	-0.055555556	0.013888889	0.069444444	1	1	1	1	1	1	1	1	1	1	1	1	0.999999
O08553 [Dihydropyrimidinase-related protein 2 ...]	-0.024573056	0.817670848	0.850593819	-0.003823267	-0.023847091	0.140399124	-0.009147249	0.142063095	0.842243904	0.875166874	0.020749789	0.000725964	0.16497218	0.015425807	0.166636151	0.032922971	-0.821494115	-0.841517939	-0.677271724	-0.826818097	-0.675607753	-0.854417086	-0.87444091	-0.710194694	-0.859741067	-0.708530723	-0.020023824	0.144222391	-0.005323982	0.145886362	0.164246216	0.014699843	0.165910187	-0.149546373	0.001663971	0.151210344	1	0.626139	0.736497	1	1	1	1	1	0.601761	0.655178	1	1	0.999999
O08692 [Neutrophilic granule protein ...]	5.329149351	7.09596717	4.911803396	6.860868727	4.313987389	4.101534571	-0.769728528	4.996309523	1.766817819	-0.417345955	1.531719376	-1.015161962	-1.22761478	-6.098877879	-0.332839828	-2.184163774	-0.235098444	-2.781979782	-2.994432599	-7.865695698	-2.099657648	1.94906533	-0.597816008	-0.810268825	-5.681531924	0.084506126	-2.546881338	-2.759334155	-7.630597254	-1.864559204	-0.212452817	-5.083715916	0.682322134	-4.871263099	0.894774951	5.76603805	1.00E-06	0	4.00E-06	0	4.00E-06	1.90E-05	0.001901	1.00E-06	1.50E-05	0.100107	6.00E-05	0.00093	0.001776
O08997 [Copper transport protein ATOX1 ...]	1.958847049	-0.535802606	-0.018495198	-0.966974046	-0.988236452	-0.872481798	-0.97330232	-0.860355278	-2.494649655	-1.977342246	-2.925821095	-2.947083501	-2.831328846	-2.932149368	-2.819202327	0.517307409	-0.43117144	-0.452433846	-0.336679191	-0.437499713	-0.324552672	-0.948478849	-0.969741255	-0.8539866	-0.954807122	-0.84186008	-0.021262406	0.094492249	-0.006328273	0.106618769	0.115754655	0.014934133	0.127881175	-0.100820522	0.01212652	0.112947042	0.645731	0.332332	0.685548	0.203715	0.191342	0.249767	0.182877	0.247741	0.093147	0.206478	0.055692	0.051827	0.063237
O09043 [Napsin-A ...]	2.700348239	-1.324761389	2.270813402	1.900433326	3.11289707	4.776747055	-2.730883919	5.857029167	-4.025109627	-0.429534837	-0.799914913	0.412548831	2.076398817	-5.431232158	3.156680929	3.59557479	3.225194714	4.437658459	6.101508444	-1.40612253	7.181790556	-0.370380076	0.842083668	2.505933654	-5.001697321	3.586215765	1.212463744	2.876313729	-4.631317245	3.956595841	1.663849985	-5.843780989	2.744132097	-7.507630974	1.080282112	8.587913086	1	0	0.007286	8.80E-05	0.013053	1.00E-06	0	0	0	0.016563	0.000296	0.016623	1.00E-06
O09114 [Prostaglandin-H2 D-isomerase ...]	2.851382622	0	0	3.631430874	0	2.901862366	0	3.385952716	-2.851382622	-2.851382622	0.780048252	-2.851382622	0.050479744	-2.851382622	0.534570095	0	3.631430874	0	2.901862366	0	3.385952716	3.631430874	0	2.901862366	0	3.385952716	-3.631430874	-0.729568508	-3.631430874	-0.245478157	2.901862366	0	3.385952716	-2.901862366	0.484090351	3.385952716	1	1	1	1	1	1	1	1	1	1	1	1	0.999999
O09131;A0A494BAB1;A0A494B9X6;A0A494BAY2;A0A494BB82;Q8K2Q2 [Glutathione S-transferase omega-1 ...]	-3.393047511	-3.049026694	-1.372722544	-2.810588153	0.408071756	-2.836072467	1.462876212	-1.559134446	0.344020817	2.020324967	0.582459358	3.801119267	0.556975044	4.855923723	1.833913065	1.676304149	0.23843854	3.45709845	0.212954227	4.511902905	1.489892248	-1.437865609	1.7807943	-1.463349922	2.835598756	-0.186411901	3.218659909	-0.025484313	4.273464365	1.251453708	-3.244144223	1.054804456	-1.967206202	4.298948678	1.276938021	-3.022010657	1.00E-06	5.00E-06	0.978625	0.001296	1.00E-06	2.00E-05	0	1	0.087846	3.00E-06	0.101601	0	0.01044
O35639;Q3TET3;A0A0G2JDV9;A0A0G2JGL7 [Annexin A3 ...]	-0.535898432	0.701460607	-1.751692839	-2.171178228	-0.888282282	-1.489425152	1.245437513	-1.485289547	1.237359039	-1.215794407	-1.635279796	-0.35238385	-0.95352672	1.781335944	-0.949391115	-2.453153446	-2.872638835	-1.589742889	-2.190885759	0.543976905	-2.186750154	-0.419485389	0.863410557	0.262267687	2.997130352	0.266403292	1.282895946	0.681753076	3.416615741	0.685888681	-0.60114287	2.133719794	-0.597007265	2.734862664	0.004135605	-2.73072706	0.042022	6.40E-05	0.228925	0.012586	0.322349	0.635168	1.20E-05	0.632426	0.00016	0.001293	3.20E-05	0.148318	0.001071
O35744;F6RU51 [Chitinase-like protein 3 ...]	5.111610361	7.382138093	0.838451722	3.796494626	1.988038069	0.694601438	-0.14406778	0.698737043	2.270527732	-4.273158639	-1.315115734	-3.123572291	-4.417008922	-5.255678141	-4.412873318	-6.543686371	-3.585643466	-5.394100024	-6.687536655	-7.526205873	-6.68340105	2.958042905	1.149586348	-0.143850284	-0.982519502	-0.139714679	-1.808456557	-3.101893188	-3.940562406	-3.097757583	-1.293436631	-2.132105849	-1.289301026	-0.838669218	0.004135605	0.842804823	0	0	0.005123	0	0	4.80E-05	0.003713	3.90E-05	0	0	2.00E-06	0	0
O35945 [Aldehyde dehydrogenase, cytosolic 1 ...]	-1.758349869	-1.194910585	-1.743499027	-1.743648982	-0.093376175	-1.649156734	1.724685201	-1.637030214	0.563439283	0.014850842	0.014700887	1.664973694	0.109193135	3.483035069	0.121319655	-0.548588442	-0.548738397	1.10153441	-0.454246148	2.919595786	-0.442119628	-0.000149955	1.650122852	0.094342293	3.468184227	0.106468813	1.650272807	0.094492249	3.468334183	0.106618769	-1.555780558	1.818061376	-1.543654038	3.373841934	0.01212652	-3.361715414	1	0.798753	1	1	0.245227	1	0.015091	1	0.768993	1	1	0.240684	0.999999
O55022 [Membrane-associated progesterone receptor componen ...]	-1.511988627	-2.136766833	-1.497137785	-1.497287741	-0.731030754	-1.402795492	1.478323959	-1.390668972	-0.624778206	0.014850842	0.014700887	0.780957874	0.109193135	2.990312586	0.121319655	0.639629048	0.639479092	1.405736079	0.733971341	3.615090792	0.746097861	-0.000149955	0.766107032	0.094342293	2.975461745	0.106468813	0.766256987	0.094492249	2.9756117	0.106618769	-0.671764738	2.209354713	-0.659638218	2.881119451	0.01212652	-2.868992931	1	0.705798	1	1	0.723336	1	0.027597	1	0.719489	1	1	0.657582	0.999999
O55142 [60S ribosomal protein L35a ...]	-0.768487353	-1.000200234	-0.49890572	-0.575362463	1.071953449	0.05189712	0.31721626	0.028674785	-0.231712881	0.269581633	0.19312489	1.840440802	0.820384473	1.085703613	0.797162138	0.501294514	0.424837771	2.072153682	1.052097353	1.317416494	1.028875019	-0.076456743	1.570859169	0.55080284	0.81612198	0.527580505	1.647315912	0.627259583	0.892578723	0.604037248	-1.020056329	-0.754737189	-1.043278664	0.26531914	-0.023222335	-0.288541475	0.889327	0.636887	1	1	0.241972	0.986025	0.705928	1	0.970623	1	1	0.118281	0.58104
O55234;Q8BTY5 [Proteasome subunit beta type-5 ...]	-1.034170813	-1.788027756	-0.746086619	0.842643707	1.058454329	-0.331598744	0.644270898	-0.302576834	-0.753856943	0.288084194	1.87681452	2.092625142	0.702572068	1.678441711	0.731593979	1.041941137	2.630671463	2.846482085	1.456429011	2.432298654	1.485450922	1.588730326	1.804540948	0.414487875	1.390357517	0.443509785	0.215810622	-1.174242451	-0.198372809	-1.145220541	-1.390053074	-0.414183432	-1.361031163	0.975869642	0.029021911	-0.946847732	1	0.613952	1	0.511999	0.404814	1	0.559509	1	0.77187	1	0.352369	0.282846	0.892796
O70138 [Neutrophil collagenase ...]	-0.021018641	1.154493259	-0.006167799	-0.006317754	-0.02758016	0.088174495	-0.012646028	0.100301014	1.175511899	0.014850842	0.014700887	-0.006561519	0.109193135	0.008372613	0.121319655	-1.160661058	-1.160811013	-1.182073419	-1.066318764	-1.167139286	-1.054192244	-0.000149955	-0.021412361	0.094342293	-0.006478229	0.106468813	-0.021262406	0.094492249	-0.006328273	0.106618769	0.115754655	0.014934133	0.127881175	-0.100820522	0.01212652	0.112947042	1	0.435091	1	1	1	1	1	1	0.420511	1	1	1	0.999999
O70145;A0A087WPH0 [Neutrophil cytosol factor 2 ...]	0.759723936	0.914212492	-0.126799934	-0.292993685	-0.63460232	0.694601438	-0.14406778	0.698737043	0.154488555	-0.88652387	-1.052717621	-1.394326256	-0.065122498	-0.903791716	-0.060986893	-1.041012425	-1.207206177	-1.548814812	-0.219611054	-1.058280272	-0.215475449	-0.166193751	-0.507802387	0.821401372	-0.017267846	0.825536977	-0.341608635	0.987595123	0.148925905	0.991730728	1.329203758	0.49053454	1.333339363	-0.838669218	0.004135605	0.842804823	0.000729	1.50E-05	0.000374	7.00E-06	0	1.00E-06	0.000127	1.00E-06	0.420511	5.60E-05	1.80E-05	1.00E-06	0.824081
O70435;E0CZ34;F8WH02;E0CYL6;E0CX62 [Proteasome subunit alpha type-3 ...]	-0.346289018	0.21346342	-0.126799934	-0.292993685	-0.63460232	0.694601438	-0.14406778	0.698737043	0.559752438	0.219489084	0.053295333	-0.288313302	1.040890456	0.202221238	1.045026061	-0.340263354	-0.506457105	-0.848065741	0.481138018	-0.3575312	0.485273623	-0.166193751	-0.507802387	0.821401372	-0.017267846	0.825536977	-0.341608635	0.987595123	0.148925905	0.991730728	1.329203758	0.49053454	1.333339363	-0.838669218	0.004135605	0.842804823	0.000235	0.205917	0.000374	7.00E-06	0	1.00E-06	0.000127	1.00E-06	8.40E-05	0.032335	0.755421	0.007741	1.00E-06
O70456 [14-3-3 protein sigma ...]	-1.48368873	-0.868766215	0.715426849	0.781559755	3.520097642	0.735132555	2.501545391	1.485335453	0.614922515	2.199115579	2.265248485	5.003786372	2.218821285	3.985234121	2.969024183	1.584193064	1.65032597	4.388863857	1.60389877	3.370311606	2.354101668	0.066132906	2.804670793	0.019705707	1.786118543	0.769908604	2.738537887	-0.046427199	1.719985637	0.703775698	-2.784965086	-1.01855225	-2.034762189	1.766412836	0.750202897	-1.016209939	0.338082	0.164252	0.004177	0.003163	3.70E-05	0.00352	0.000151	0.000818	0.651623	0.014723	0.013332	5.90E-05	0.014128
O70475;D3YXP9 [UDP-glucose 6-dehydrogenase ...]	-3.50899829	-5.246285208	-1.554376529	-2.329982652	-0.399835254	-0.063272669	1.641176174	0.24734091	-1.737286918	1.954621761	1.179015638	3.109163036	3.445725621	5.150174464	3.7563392	3.691908679	2.916302556	4.846449954	5.183012539	6.887461382	5.493626118	-0.775606124	1.154541275	1.49110386	3.195552702	1.801717439	1.930147399	2.266709983	3.971158826	2.577323563	0.336562585	2.041011428	0.647176164	1.704448843	0.310613579	-1.393835263	0	0	0.670784	0.000142	1.00E-06	1.00E-06	0	0	0	0	0	0	0
O88342;A0A0J9YU05 [WD repeat-containing protein 1 ...]	-0.164515127	0.280325381	-0.152455134	0.838034679	0.962226825	-1.089446683	1.639980341	1.815714397	0.444840508	0.012059993	1.002549806	1.126741952	-0.924931556	1.804495468	1.980229524	-0.432780515	0.557709298	0.681901444	-1.369772064	1.35965496	1.535389016	0.990489813	1.114681959	-0.936991549	1.792435475	1.968169531	0.124192146	-1.927481362	0.801945662	0.977679718	-2.051673508	0.677753516	0.853487572	2.729427024	2.90516108	0.175734056	2.00E-06	0	5.00E-06	0	0	0.003221	0	0	0.010776	1	0.000205	1.70E-05	8.20E-05
O88536 [Formyl peptide receptor 2 ...]	0	1.9033502	0	0	0	0.055555556	0	0.069444444	1.9033502	0	0	0	0.055555556	0	0.069444444	-1.9033502	-1.9033502	-1.9033502	-1.847794644	-1.9033502	-1.833905755	0	0	0.055555556	0	0.069444444	0	0.055555556	0	0.069444444	0.055555556	0	0.069444444	-0.055555556	0.013888889	0.069444444	1	1	1	1	1	1	1	1	1	1	1	1	0.999999
O88569;A0A0N4SUM2 [Heterogeneous nuclear ribonucleoproteins A2/B1 ...]	-0.167347005	1.227475914	-1.336963302	-0.883214408	-1.844765688	-0.51556193	0.483825123	-0.511426325	1.39482292	-1.169616297	-0.715867403	-1.677418683	-0.348214925	0.651172128	-0.34407932	-2.564439216	-2.110690323	-3.072241603	-1.743037844	-0.743650791	-1.73890224	0.453748893	-0.507802387	0.821401372	1.820788425	0.825536977	-0.96155128	0.367652478	1.367039531	0.371788083	1.329203758	2.328590811	1.333339363	0.999387053	0.004135605	-0.995251448	0.352985	8.00E-06	0.002239	0.08978	5.60E-05	1	0.001041	1	9.70E-05	0.000388	0.009505	2.30E-05	0.185839
O88844;A0A087WPT4;A0A087WRS9;D3YVY3;A0A087WRM4;A0A0U1RP68;D6RIL6;P54071 [Isocitrate dehydrogenase [NADP] cytoplasmic ...]	-2.876101092	-2.61498504	-2.47735386	-1.519834168	0.215656997	0.121894905	2.347021474	0.522452082	0.261116053	0.398747232	1.356266924	3.091758089	2.997995997	5.223122567	3.398553174	0.137631179	1.095150872	2.830642036	2.736879944	4.962006514	3.137437121	0.957519692	2.693010857	2.599248765	4.824375335	2.999805942	1.735491165	1.641729073	3.866855642	2.042286249	-0.093762092	2.131364478	0.306795085	2.22512657	0.400557177	-1.824569393	0.551391	0.798753	1	0.255111	0.001609	0.002303	2.20E-05	0.000776	0.719489	0.737397	0.020242	8.50E-05	0.00011
O89020 [Afamin ...]	0.418629462	-0.71071729	-0.031747137	-1.966950199	-2.308558834	-0.979355076	-1.818024294	-0.975219471	-1.129346752	-0.450376599	-2.385579661	-2.727188297	-1.397984538	-2.236653757	-1.393848934	0.678970153	-1.256232909	-1.597841545	-0.268637787	-1.107307005	-0.264502182	-1.935203063	-2.276811698	-0.94760794	-1.786277158	-0.943472335	-0.341608635	0.987595123	0.148925905	0.991730728	1.329203758	0.49053454	1.333339363	-0.838669218	0.004135605	0.842804823	0	0	0	0	0	0	0	0	0	0.000313	0	0	0
O89053;G3UYK8;A0A0U1RPY8;D3YW57;G3UX53;D3YXM2 [Coronin-1A;Coronin ...]	4.497879573	6.086584185	1.995968761	3.39138275	-0.238214841	0.694601438	-0.14406778	0.698737043	1.588704612	-2.501910813	-1.106496824	-4.736094414	-3.803278135	-4.641947353	-3.79914253	-4.090615425	-2.695201436	-6.324799026	-5.391982747	-6.230651965	-5.387847143	1.395413989	-2.234183601	-1.301367323	-2.140036541	-1.297231718	-3.62959759	-2.696781312	-3.53545053	-2.692645707	0.932816279	0.094147061	0.936951884	-0.838669218	0.004135605	0.842804823	0	0	6.20E-05	2.00E-06	0.210034	0.056102	0.315369	0.052871	8.90E-05	3.00E-06	0.004647	0	0
P00329 [Alcohol dehydrogenase 1 ...]	-3.524668217	-6.215303026	-2.462723467	-3.353221092	0.839130184	-3.376516765	1.845620201	-0.516771262	-2.690634809	1.061944751	0.171447125	4.363798402	0.148151452	5.370288418	3.007896955	3.752579559	2.862081934	7.054433211	2.838786261	8.060923227	5.698531764	-0.890497626	3.301853651	-0.913793299	4.308343668	1.945952205	4.192351277	-0.023295673	5.198841293	2.83644983	-4.21564695	1.006490016	-1.355901447	5.222136966	2.859745503	-2.362391463	5.50E-05	0	0.036633	0.000133	1.00E-06	0.000118	0	0.000304	1.00E-06	0.001536	0.682356	0	0.739946
P00405 [Cytochrome c oxidase subunit 2 ...]	0.164440587	0.414599761	-0.978601452	-0.066958259	-0.998958325	-0.834712109	0.965963984	-0.833048138	0.250159174	-1.143042039	-0.231398847	-1.163398912	-0.999152697	0.801523397	-0.997488726	-1.393201213	-0.48155802	-1.413558086	-1.24931187	0.551364224	-1.247647899	0.911643192	-0.020356873	0.143889343	1.944565436	0.145553314	-0.932000065	-0.76775385	1.032922244	-0.766089879	0.164246216	1.964922309	0.165910187	1.800676094	0.001663971	-1.799012123	0.494143	0.334247	1	0.665159	1	1	0.14935	1	0.982653	0.482756	1	0.449687	0.564477
P00920;A0A0A6YX78 [Carbonic anhydrase 2 ...]	1.592535254	3.351488544	1.580982272	4.874122145	-0.196666173	2.060067205	-0.14406778	0.698737043	1.75895329	-0.011552982	3.281586892	-1.789201426	0.467531951	-1.736603034	-0.893798211	-1.770506272	1.522633601	-3.548154716	-1.291421339	-3.495556324	-2.652751501	3.293139874	-1.777648444	0.479084933	-1.725050052	-0.882245229	-5.070788318	-2.81405494	-5.018189925	-4.175385102	2.256733378	0.052598393	0.895403216	-2.204134985	-1.361330162	0.842804823	0.000148	1.00E-06	0.000295	0	0.28151	0.000777	0.302444	0.0486	0.000187	1	0	6.20E-05	0.368458
P01027;H3BKW9;H3BL60;CON__Q2UVX4 [Complement C3;Complement C3 beta chain;C3-beta-c;C ...]	1.204402372	1.001415825	2.519917821	1.271454409	-0.09509847	2.193816117	-2.123239108	1.853980089	-0.202986546	1.315515449	0.067052037	-1.299500842	0.989413745	-3.327641479	0.649577717	1.518501996	0.270038584	-1.096514295	1.192400292	-3.124654933	0.852564264	-1.248463412	-2.615016291	-0.326101704	-4.643156929	-0.665937732	-1.366552879	0.922361708	-3.394693517	0.58252568	2.288914587	-2.028140638	1.949078559	-4.317055225	-0.339836028	3.977219197	0.000189	3.20E-05	0.036991	0.00036	0	0.94223	0	0.146824	0.279578	1.40E-05	0.937502	1.20E-05	0.000106
P01029 [Complement C4-B;Complement C4 beta chain;Complemen ...]	0.314035749	-0.317776934	1.116335462	-1.23061363	-1.572222265	-0.243018507	-1.081687725	-0.238882902	-0.631812683	0.802299713	-1.544649378	-1.886258014	-0.557054256	-1.395723474	-0.552918651	1.434112396	-0.912836696	-1.254445331	0.074758427	-0.763910791	0.078894032	-2.346949092	-2.688557727	-1.359353969	-2.198023187	-1.355218364	-0.341608635	0.987595123	0.148925905	0.991730728	1.329203758	0.49053454	1.333339363	-0.838669218	0.004135605	0.842804823	1.00E-06	0	0.881323	0	0	0	0	0	2.00E-06	1.00E-06	0	0	7.00E-06
P01132;A0A0G2JDT8;A0A0G2JF92;A0A0G2JFB8 [Pro-epidermal growth factor;Epidermal growth facto ...]	3.070727976	-4.755780544	-0.000200342	1.665040518	0.784846963	1.522077332	-2.20860162	1.470901466	-7.82650852	-3.070928317	-1.405687458	-2.285881012	-1.548650644	-5.279329596	-1.59982651	4.755580202	6.420821062	5.540627508	6.277857876	2.547178924	6.22668201	1.66524086	0.785047305	1.522277673	-2.208401278	1.471101808	-0.880193554	-0.142963186	-3.873642138	-0.194139052	0.737230368	-2.993448583	0.686054503	-3.730678952	-0.051175866	3.679503086	0.01742	0	7.40E-05	0.117606	0.007998	0.076528	0	0.075133	0	3.00E-06	0.000946	0.000383	0.000893
P01837 [Ig kappa chain C region ...]	-1.03901922	-3.013019582	1.679370329	-2.358074285	-2.399360515	-2.1749152	-2.36972654	-2.175013598	-1.974000361	2.718389549	-1.319055065	-1.360341295	-1.13589598	-1.330707319	-1.135994378	4.692389911	0.654945297	0.613659067	0.838104382	0.643293042	0.838005983	-4.037444614	-4.078730844	-3.854285529	-4.049096869	-3.854383927	-0.04128623	0.183159085	-0.011652255	0.183060687	0.224445315	0.029633975	0.224346917	-0.19481134	-9.84E-05	0.194712941	0	0	0	0	0	0	0	0	0	0	0	0	0
P01887 [Beta-2-microglobulin ...]	1.091966348	1.664943205	2.519448034	0.776724749	0.707388551	1.796570468	0.394459321	1.682076539	0.572976858	1.427481686	-0.315241599	-0.384577797	0.70460412	-0.697507027	0.590110191	0.854504829	-0.888218456	-0.957554654	0.131627263	-1.270483885	0.017133334	-1.742723285	-1.812059483	-0.722877566	-2.124988714	-0.837371495	-0.069336198	1.019845719	-0.382265429	0.90535179	1.089181917	-0.312929231	0.974687988	-1.402111148	-0.114493929	1.287617218	0.000194	1.20E-05	3.00E-06	0.016087	0.001427	0.00145	0.046896	0.001638	0.053457	0.000301	0.608792	0.201562	0.251774
P01897;P01899;P01896 [H-2 class I histocompatibility antigen, L-D alpha ...]	1.147213383	1.384371756	-0.126799934	-0.292993685	-0.63460232	0.694601438	-0.14406778	0.698737043	0.237158374	-1.274013316	-1.440207068	-1.781815703	-0.452611945	-1.291281163	-0.44847634	-1.51117169	-1.677365441	-2.018974077	-0.689770318	-1.528439537	-0.685634714	-0.166193751	-0.507802387	0.821401372	-0.017267846	0.825536977	-0.341608635	0.987595123	0.148925905	0.991730728	1.329203758	0.49053454	1.333339363	-0.838669218	0.004135605	0.842804823	0	0	0.000167	2.00E-06	0	1.00E-06	5.10E-05	0	0.000479	0	0	0	6.00E-06
P01898;A0A494B9G2;A0A0B4J1G3;A0A494B9G8;E9PWT4;E9QJR9;P79568;E9PX63;Q8HWB2;A0A494BA33;A0A494BAT0;Q3TH01;O19441;A7VMS6;E9Q0G4;G3UXE9;P01895;P14430;P14428;P14429;P14426;P01900;P03991;P04223;P01901 [H-2 class I histocompatibility antigen, Q10 alpha ...]	0.127225649	0.022157727	0.730287393	-1.706985546	-2.048594181	-0.719390423	-1.558059641	-0.715254818	-0.105067922	0.603061745	-1.834211194	-2.17581983	-0.846616071	-1.68528529	-0.842480467	0.708129667	-1.729143272	-2.070751907	-0.741548149	-1.580217367	-0.737412544	-2.437272939	-2.778881574	-1.449677816	-2.288347034	-1.445542211	-0.341608635	0.987595123	0.148925905	0.991730728	1.329203758	0.49053454	1.333339363	-0.838669218	0.004135605	0.842804823	0	0	1.60E-05	0	0	0	0	0	0.034024	1.40E-05	0	0	0
P03953 [Complement factor D ...]	2.300034278	-4.149116278	-2.131731389	-2.29792514	-1.315261721	-1.310330017	-2.148999235	-1.306194413	-6.449150556	-4.431765667	-4.597959418	-3.615295999	-3.610364295	-4.449033513	-3.60622869	2.017384889	1.851191138	2.833854557	2.838786261	2.000117043	2.842921866	-0.166193751	0.816469668	0.821401372	-0.017267846	0.825536977	0.982663419	0.987595123	0.148925905	0.991730728	0.004931704	-0.833737514	0.009067309	-0.838669218	0.004135605	0.842804823	0.439727	0	0	0	0	0	0	0	0	0	0	0	0
P04104 [Keratin, type II cytoskeletal 1 ...]	1.069944311	-0.375762485	0.904874645	0.589491213	0.40104302	2.652463225	-1.734488069	2.967652943	-1.445706796	-0.165069667	-0.480453098	-0.668901291	1.582518914	-2.80443238	1.897708632	1.28063713	0.965253698	0.776805505	3.02822571	-1.358725584	3.343415428	-0.315383431	-0.503831625	1.747588581	-2.639362714	2.062778298	-0.188448193	2.062972012	-2.323979283	2.37816173	2.251420205	-2.135531089	2.566609923	-4.386951295	0.315189718	4.702141012	0.016543	5.00E-06	0.005372	0.000642	0.000163	0.002527	9.60E-05	0.000326	0.000125	0.659095	0.073731	0.01574	5.00E-05
P04117;A0A0A6YW05;A0A0A6YXB9;A0A0A6YXI2;P24526;O08716 [Fatty acid-binding protein, adipocyte ...]	-1.154506836	-4.433794205	-0.198377987	-1.104361014	2.735912581	-2.215115722	1.10783188	-0.112221862	-3.279287369	0.956128849	0.050145822	3.890419417	-1.060608886	2.262338716	1.042284974	4.235416218	3.329433191	7.169706786	2.218678483	5.541626085	4.321572343	-0.905983027	2.934290568	-2.016737735	1.306209867	0.086156125	3.840273595	-1.110754708	2.212192894	0.992139152	-4.951028303	-1.628080701	-2.848134443	3.322947602	2.10289386	-1.220053742	0.790751	0	3.00E-06	1	0	0.00171	0	8.60E-05	0	1.00E-06	0.85137	0	0.002281
P04919 [Band 3 anion transport protein ...]	-0.237559989	3.202479944	-0.126799934	4.058868796	-0.63460232	0.694601438	-0.14406778	0.698737043	3.440039932	0.110760055	4.296428785	-0.397042332	0.932161427	0.093492209	0.936297031	-3.329279877	0.856388853	-3.837082264	-2.507878505	-3.346547724	-2.503742901	4.18566873	-0.507802387	0.821401372	-0.017267846	0.825536977	-4.693471117	-3.364267358	-4.202936576	-3.360131753	1.329203758	0.49053454	1.333339363	-0.838669218	0.004135605	0.842804823	3.30E-05	0	0.000637	0	0	2.00E-06	0.000236	2.00E-06	0	0.066168	0	2.30E-05	0
P05064;A6ZI44;Q9CPQ9;A6ZI46;D3Z510;A0A0U1RPN8;D3YWI1;D3YV98;A0A0U1RPT5;A6ZI47 [Fructose-bisphosphate aldolase A;Fructose-bisphosp ...]	-0.913765039	-0.308375868	-0.116866318	-0.287702562	0.027422626	-2.976611821	0.954361944	-2.015531345	0.605389171	0.796898721	0.626062478	0.941187665	-2.062846782	1.868126983	-1.101766306	0.19150955	0.020673307	0.335798494	-2.668235953	1.262737812	-1.707155476	-0.170836243	0.144288944	-2.859745503	1.071228262	-1.898665027	0.315125187	-2.68890926	1.242064505	-1.727828783	-3.004034447	0.926939318	-2.04295397	3.930973765	0.961080477	-2.969893288	1	0.006404	0.001874	0.006067	0.000432	2.00E-06	3.00E-06	0.006105	0.010125	0.002095	0.009334	0.000622	2.00E-06
P05201 [Aspartate aminotransferase, cytoplasmic ...]	-2.080406059	-3.327631816	0.695330642	-2.044955384	-1.298928439	-1.861796299	-1.004873494	-1.861894697	-1.247225758	2.7757367	0.035450675	0.781477619	0.21860976	1.075532565	0.218511362	4.022962458	1.282676433	2.028703377	1.465835517	2.322758322	1.465737119	-2.740286025	-1.994259081	-2.557126941	-1.700204136	-2.557225339	0.746026944	0.183159085	1.040081889	0.183060687	-0.56286786	0.294054945	-0.562966258	0.856922805	-9.84E-05	-0.857021203	0	0	0.047415	0	0	0	0	0	0	0	0.000398	0	0
P05202 [Aspartate aminotransferase, mitochondrial ...]	-1.376200801	-1.828438009	-1.913254151	-2.079447902	-0.931602559	-1.091852779	1.001124598	-1.087717174	-0.452237209	-0.53705335	-0.703247101	0.444598242	0.284348022	2.377325399	0.288483626	-0.084816141	-0.251009893	0.896835451	0.73658523	2.829562607	0.740720835	-0.166193751	0.981651592	0.821401372	2.914378749	0.825536977	1.147845343	0.987595123	3.0805725	0.991730728	-0.160250221	1.932727157	-0.156114616	2.092977377	0.004135605	-2.088841772	0.03491	0.000248	0.000285	4.70E-05	0.849861	0.829669	3.00E-06	0.857489	0.000175	5.60E-05	9.00E-06	0.000198	0.00442
P05366;A0A1B0GQV5;P05367 [Serum amyloid A-1 protein;Serum amyloid A-2 protei ...]	-0.776798128	-1.824994633	-1.15862687	0.4528767	-1.200396104	-0.975950789	-1.170762129	-0.976049187	-1.048196504	-0.381828742	1.229674829	-0.423597976	-0.199152661	-0.393964001	-0.199251059	0.666367763	2.277871333	0.624598528	0.849043843	0.654232504	0.848945445	1.61150357	-0.041769234	0.18267608	-0.012135259	0.182577682	-1.653272805	-1.42882749	-1.623638829	-1.428925888	0.224445315	0.029633975	0.224346917	-0.19481134	-9.84E-05	0.194712941	0	0	0	0	0	0	0	0	0	5.00E-06	0	2.00E-06	0.000593
P06684 [Complement C5;Complement C5 beta chain;Complement ...]	-0.326377929	-3.146259561	-1.128874671	-1.295068423	-1.636677058	-0.3074733	-1.146142518	-0.303337695	-2.819881632	-0.802496743	-0.968690494	-1.310299129	0.018904629	-0.819764589	0.023040234	2.017384889	1.851191138	1.509582503	2.838786261	2.000117043	2.842921866	-0.166193751	-0.507802387	0.821401372	-0.017267846	0.825536977	-0.341608635	0.987595123	0.148925905	0.991730728	1.329203758	0.49053454	1.333339363	-0.838669218	0.004135605	0.842804823	0	0	0	0	0	0	0	0	0	4.00E-06	1.00E-06	0	0.999999
P06728 [Apolipoprotein A-IV ...]	0.36566122	-2.504496573	0.959405044	-0.806345635	-2.426624079	0.095661622	-1.818944546	-1.825478027	-2.870157793	0.593743824	-1.172006855	-2.7922853	-0.269999599	-2.184605766	-2.191139247	3.463901617	1.698150938	0.077872493	2.600158194	0.685552027	0.679018546	-1.765750679	-3.386029123	-0.863743422	-2.77834959	-2.784883071	-1.620278445	0.902007256	-1.012598911	-1.019132392	2.522285701	0.607679534	0.601146053	-1.914606167	-1.921139648	-0.006533481	0.00655	2.00E-06	0.091994	0.000128	2.00E-06	0.002304	9.00E-06	3.80E-05	5.90E-05	0.254226	0.022265	7.10E-05	0.714263
P06745;A0A0U1RQ72;A0A0U1RP97;CON__Q3ZBD7;A0A0U1RQ18 [Glucose-6-phosphate isomerase ...]	2.970593534	5.68900939	0.925095178	1.896925301	2.534782504	0.694601438	-0.14406778	0.698737043	2.718415856	-2.045498356	-1.073668233	-0.43581103	-2.275992096	-3.114661314	-2.271856491	-4.763914212	-3.792084089	-3.154226886	-4.994407952	-5.83307717	-4.990272347	0.971830123	1.609687326	-0.23049374	-1.069162958	-0.226358135	0.637857203	-1.202323863	-2.040993081	-1.198188258	-1.840181066	-2.678850284	-1.836045461	-0.838669218	0.004135605	0.842804823	0	0	0.054064	1.90E-05	1.00E-06	0.034486	0.251297	0.03254	1.00E-06	0.000183	0.000714	0.087017	2.00E-06
P06801;Q3TQP6 [NADP-dependent malic enzyme;Malic enzyme ...]	-1.674353896	-3.328035969	-0.484004839	-1.16490091	1.458045752	0.432598005	0.464127197	-0.485114103	-1.653682073	1.190349057	0.509452987	3.132399649	2.106951901	2.138481093	1.189239793	2.84403113	2.163135059	4.786081721	3.760633974	3.792163166	2.842921866	-0.68089607	1.942050592	0.916602844	0.948132036	-0.001109264	2.622946662	1.597498914	1.629028106	0.679786806	-1.025447747	-0.993918555	-1.943159856	0.031529192	-0.917712108	-0.9492413	0.005187	8.00E-06	1	0.074801	0.000199	0.069322	0.021792	1	0.000202	0.002175	0.133538	1.00E-06	0.000283
P07309 [Transthyretin ...]	1.757500206	1.923648955	2.332417343	0.878834104	-1.374864619	1.523293024	-2.725823705	-0.006367173	0.166148749	0.574917137	-0.878666102	-3.132364825	-0.234207181	-4.48332391	-1.763867378	0.408768388	-1.044814851	-3.298513574	-0.40035593	-4.64947266	-1.930016128	-1.453583239	-3.707281962	-0.809124318	-5.058241048	-2.338784516	-2.253698723	0.644458921	-3.604657808	-0.885201276	2.898157644	-1.350959085	1.368497447	-4.249116729	-1.529660197	2.719456532	0.003411	0.009088	0.196424	3.90E-05	1.00E-06	0.000822	0	2.00E-06	0.651196	0.05186	0.006599	7.00E-06	0.505032
P07310;A0A0J9YKD4 [Creatine kinase M-type ...]	-0.021018641	-0.645796846	4.091908893	3.487342987	-0.02758016	0.088174495	-0.012646028	0.100301014	-0.624778206	4.112927534	3.508361627	-0.006561519	0.109193135	0.008372613	0.121319655	4.73770574	4.133139833	0.618216686	0.733971341	0.633150819	0.746097861	-0.604565907	-4.119489053	-4.003734399	-4.104554921	-3.991607879	-3.514923147	-3.399168492	-3.499989014	-3.387041972	0.115754655	0.014934133	0.127881175	-0.100820522	0.01212652	0.112947042	1	0.705798	0.005761	0.01264	1	1	1	1	0.719489	0.005014	0.012947	1	0.999999
P07356;B0V2N8;B0V2N7;B0V2N5 [Annexin A2;Annexin ...]	0.141895343	1.533887979	-1.599448332	-1.065555042	-0.274143753	-1.280501181	0.738722847	0.735847054	1.391992636	-1.741343674	-1.207450384	-0.416039096	-1.422396524	0.596827504	0.593951711	-3.133336311	-2.599443021	-1.808031732	-2.81438916	-0.795165133	-0.798040925	0.53389329	1.325304579	0.31894715	2.338171178	2.335295386	0.791411289	-0.21494614	1.804277888	1.801402096	-1.006357428	1.012866599	1.009990807	2.019224028	2.016348235	-0.002875792	0.000245	0	0.000455	0.072402	0.013547	0.106686	4.00E-06	4.00E-06	7.00E-06	1.00E-06	2.80E-05	0.025345	0.000577
P07361 [Alpha-1-acid glycoprotein 2 ...]	0.5379446	0.157766581	-0.82777096	-0.828253965	-0.869540195	-0.64509488	-0.839906219	-0.645193278	-0.380178018	-1.36571556	-1.366198564	-1.407484794	-1.18303948	-1.377850819	-1.183137878	-0.985537542	-0.986020546	-1.027306776	-0.802861461	-0.997672801	-0.802959859	-0.000483004	-0.041769234	0.18267608	-0.012135259	0.182577682	-0.04128623	0.183159085	-0.011652255	0.183060687	0.224445315	0.029633975	0.224346917	-0.19481134	-9.84E-05	0.194712941	0.003221	6.00E-06	0	0	0	0	0	0	0	0	0	0	0
P07515 [ ...]	-1.178448775	-2.183159785	3.281618836	-0.50068802	-2.183159785	-2.127604229	-2.183159785	-2.11371534	-1.00471101	4.460067611	0.677760756	-1.00471101	-0.949155454	-1.00471101	-0.935266565	5.46477862	1.682471765	0	0.055555556	0	0.069444444	-3.782306855	-5.46477862	-5.409223065	-5.46477862	-5.395334176	-1.682471765	-1.62691621	-1.682471765	-1.613027321	0.055555556	0	0.069444444	-0.055555556	0.013888889	0.069444444	0	0	1.00E-06	1.00E-06	0	0	0	0	0.000234	0	0.042121	0.000235	0.000375
P07724 [Serum albumin ...]	0.862165284	0.862165284	0.862165284	-0.302922149	0.409550898	-0.043063489	-0.862165284	-0.043063489	0	0	-1.165087433	-0.452614386	-0.905228772	-1.724330567	-0.905228772	0	-1.165087433	-0.452614386	-0.905228772	-1.724330567	-0.905228772	-1.165087433	-0.452614386	-0.905228772	-1.724330567	-0.905228772	0.712473047	0.259858661	-0.559243134	0.259858661	-0.452614386	-1.271716181	-0.452614386	-0.819101795	0	0.819101795	1	1	1	1	1	0	1	0	1	1	1	1	0
P07901;B7ZC50;A2A6A2;B7ZC49;REV__Q8BL66 [Heat shock protein HSP 90-alpha ...]	-1.478207314	-0.208792337	-1.590731133	-0.941084412	-0.198246526	-1.778776309	0.579290106	-1.774640704	1.269414977	-0.112523819	0.537122902	1.279960787	-0.300568995	2.05749742	-0.296433391	-1.381938795	-0.732292074	0.010545811	-1.569983972	0.788082444	-1.565848367	0.649646721	1.392484606	-0.188045177	2.170021239	-0.183909572	0.742837885	-0.837691898	1.520374518	-0.833556293	-1.580529783	0.777536633	-1.576394178	2.358066416	0.004135605	-2.353930811	2.60E-05	0.009823	0.002169	0.012619	0.008898	3.00E-06	2.10E-05	2.00E-06	1.00E-06	0.883543	0.000666	1.00E-06	0.021267
P08030;A0A1D5RLR6 [Adenine phosphoribosyltransferase ...]	0.061728781	0.943782391	-0.088016215	-0.164472958	0.0733288	0.462786625	-0.093673245	0.43956429	0.88205361	-0.149744995	-0.226201738	0.011600019	0.401057844	-0.155402026	0.37783551	-1.031798605	-1.108255348	-0.870453591	-0.480995766	-1.037455636	-0.5042181	-0.076456743	0.161345014	0.55080284	-0.00565703	0.527580505	0.237801757	0.627259583	0.070799713	0.604037248	0.389457826	-0.167002045	0.366235491	-0.55645987	-0.023222335	0.533237535	1	0.524686	1	1	1	0.986025	1	1	0.502755	1	1	1	0.92575
P08032 [Spectrin alpha chain, erythrocytic 1 ...]	-0.663382923	-0.848742084	-0.126799934	1.927829663	-0.63460232	0.694601438	-0.14406778	0.698737043	-0.185359162	0.536582989	2.591212586	0.028780603	1.357984361	0.519315143	1.362119966	0.721942151	2.776571747	0.214139764	1.543343523	0.704674304	1.547479127	2.054629596	-0.507802387	0.821401372	-0.017267846	0.825536977	-2.562431983	-1.233228225	-2.071897443	-1.22909262	1.329203758	0.49053454	1.333339363	-0.838669218	0.004135605	0.842804823	0	0	0.000374	0	0	1.00E-06	0.000127	1.00E-06	0.051658	1.00E-06	0	0.70391	0
P08071;A0A0G2JDN0;A0A0G2JGN1;A0A0G2JFM6;A0A0G2JEA3 [Lactotransferrin ...]	4.058868796	7.013755853	1.942814783	4.916539395	2.161266364	3.152034591	-0.14406778	3.001058471	2.954887056	-2.116054013	0.857670599	-1.897602432	-0.906834205	-4.202936576	-1.057810325	-5.070941069	-2.097216458	-4.852489489	-3.861721262	-7.157823633	-4.012697382	2.973724612	0.218451581	1.209219808	-2.086882563	1.058243688	-2.755273031	-1.764504804	-5.060607175	-1.915480924	0.990768227	-2.305334144	0.839792107	-3.296102371	-0.15097612	3.145126251	0	0	1.00E-06	0	0	0	0.022328	0	0	0	2.50E-05	0	9.00E-05
P08074;F6YNX9 [Carbonyl reductase [NADPH] 2 ...]	-1.304363271	0.970407167	-1.001428235	-1.091648248	-0.70090345	-0.548153623	0.880798688	-0.520894081	2.274770438	0.302935036	0.212715024	0.603459821	0.756209648	2.185161959	0.78346919	-1.971835403	-2.062055415	-1.671310618	-1.51856079	-0.08960848	-1.491301249	-0.090220012	0.300524785	0.453274612	1.882226923	0.480534154	0.390744797	0.543494625	1.972446935	0.570754166	0.152749828	1.581702138	0.180009369	1.428952311	0.027259542	-1.401692769	0.822881	0.048139	1	1	1	0.959886	0.057002	0.924998	0.020133	0.967881	1	0.606	0.505032
P08113;F7C312 [Endoplasmin ...]	-2.268280728	-1.192672172	-2.953553974	-3.119747725	-1.080444627	-2.132152602	1.001851767	-2.128016998	1.075608556	-0.685273246	-0.851466997	1.1878361	0.136128125	3.270132495	0.14026373	-1.760881802	-1.927075553	0.112227545	-0.93948043	2.194523939	-0.935344825	-0.166193751	1.873109347	0.821401372	3.955405741	0.825536977	2.039303098	0.987595123	4.121599492	0.991730728	-1.051707975	2.082296394	-1.04757237	3.134004369	0.004135605	-3.129868764	4.00E-06	0.033754	0	0	0.362738	0	0	0	2.00E-05	0.000499	0.000118	7.00E-06	0.446587
P08226;A0A1B0GX15;G3UWN5;G3UZM8 [Apolipoprotein E ...]	0.036993558	-3.120178948	1.375218642	-1.635324434	-1.459180972	0.985505196	-1.646523337	-0.474406823	-3.157172506	1.338225084	-1.672317992	-1.49617453	0.948511638	-1.683516895	-0.511400381	4.495397591	1.484854515	1.660997976	4.105684144	1.473655612	2.645772125	-3.010543076	-2.834399615	-0.389713447	-3.021741979	-1.849625465	0.176143461	2.620829629	-0.011198903	1.160917611	2.444686168	-0.187342365	0.984774149	-2.632028532	-1.459912019	1.172116514	0.000302	0	0.546688	5.00E-06	1.00E-06	0.05649	1.00E-06	0.000856	2.00E-06	0.001156	0.000733	0.000496	0.00963
P08228 [Superoxide dismutase [Cu-Zn] ...]	-4.07484733	-1.66223545	-2.920282015	-0.497608748	0.149352131	-3.637024961	1.240255521	-2.184723456	2.412611881	1.154565316	3.577238582	4.224199461	0.43782237	5.315102851	1.890123874	-1.258046565	1.164626701	1.811587581	-1.974789511	2.90249097	-0.522488006	2.422673266	3.069634146	-0.716742946	4.160537536	0.735558559	0.646960879	-3.139416212	1.737864269	-1.687114708	-3.786377092	1.09090339	-2.334075587	4.877280481	1.452301505	-3.424978977	0.000762	0.556684	0.041499	0.243832	0.026633	0.001203	0.00084	0.26039	0.002201	0.184554	0.000171	3.90E-05	0.631242
P08249;A0A0G2JF23;A0A0G2JGY4 [Malate dehydrogenase, mitochondrial ...]	-0.508138792	-0.081612724	-2.224594356	-0.137198641	-0.60431192	-1.403192984	1.290870061	-1.399057379	0.426526068	-1.716455564	0.370940152	-0.096173127	-0.895054192	1.799008854	-0.890918587	-2.142981632	-0.055585917	-0.522699196	-1.32158026	1.372482786	-1.317444655	2.087395715	1.620282436	0.821401372	3.515464417	0.825536977	-0.467113279	-1.265994343	1.428068702	-1.261858739	-0.798881064	1.895181981	-0.79474546	2.694063046	0.004135605	-2.689927441	0.024269	0.00172	0.010953	0.002716	0.042048	0.975294	8.00E-06	0.988667	0.097243	2.60E-05	0.160482	0.850859	0.002634
P08752;A0A0A6YWA9;B2RSH2;A2AE32;P20612;P18872;Q3V3I2;P50149;A2A610;A2AE31;Q8C040;D3Z2M7;Q8BHK8;F6QPU5;Z4YKV1;Q66L47;Q8CGK7;P63094;Q6R0H7 [Guanine nucleotide-binding protein G(i) subunit al ...]	2.26458541	2.068393884	-0.126799934	1.134394131	-0.374833641	0.694601438	-0.14406778	0.698737043	-0.196191526	-2.391385344	-1.130191279	-2.639419051	-1.569983972	-2.40865319	-1.565848367	-2.195193818	-0.933999753	-2.443227525	-1.373792446	-2.212461664	-1.369656841	1.261194065	-0.248033707	0.821401372	-0.017267846	0.825536977	-1.509227772	-0.439792693	-1.278461911	-0.435657088	1.069435079	0.230765861	1.073570684	-0.838669218	0.004135605	0.842804823	0	0	0.002239	0	0.000353	1.00E-05	0.001086	8.00E-06	0.013434	0	0	0	0
P08905;P17897 [Lysozyme C-2;Lysozyme C-1 ...]	3.432117065	6.184022818	0.958677282	3.286483935	1.646205355	0.694601438	-0.14406778	0.698737043	2.751905753	-2.473439783	-0.14563313	-1.78591171	-2.737515627	-3.576184845	-2.733380022	-5.225345536	-2.897538882	-4.537817462	-5.48942138	-6.328090598	-5.485285775	2.327806653	0.687528073	-0.264075844	-1.102745062	-0.259940239	-1.64027858	-2.591882497	-3.430551715	-2.587746892	-0.951603917	-1.790273135	-0.947468312	-0.838669218	0.004135605	0.842804823	0	0	0.007718	0	0	0.000525	0.022549	0.000447	0	7.00E-06	0.682539	1.00E-06	0
P09103;E9Q8G8 [Protein disulfide-isomerase ...]	-1.069332534	0.160084409	-1.074895557	0.671540459	0.140293648	-0.253494185	0.804027843	-0.24935858	1.229416943	-0.005563023	1.740872992	1.209626181	0.815838349	1.873360377	0.819973954	-1.234979966	0.51145605	-0.019790761	-0.413578594	0.643943434	-0.409442989	1.746436015	1.215189204	0.821401372	1.8789234	0.825536977	-0.531246811	-0.925034644	0.132487384	-0.920899039	-0.393787833	0.663734195	-0.389652228	1.057522028	0.004135605	-1.053386423	0.431217	0.003071	0.442982	0.00021	0.008586	0.065138	0.000111	0.061467	0.000696	1	7.00E-05	0.001981	0.009711
P09405 [Nucleolin ...]	-1.318928356	-0.36111911	-0.143420016	-0.557493106	0.511498657	-0.200275628	0.750809286	-0.196140023	0.957809247	1.17550834	0.76143525	1.830427013	1.118652729	2.069737642	1.122788333	0.217699093	-0.196373996	0.872617767	0.160843482	1.111928395	0.164979087	-0.414073089	0.654918674	-0.056855611	0.894229302	-0.052720006	1.068991763	0.357217478	1.308302391	0.361353083	-0.711774285	0.239310628	-0.70763868	0.951084913	0.004135605	-0.946949308	0.001404	0.011827	0.000405	0.124448	1.00E-06	0.000525	0	0.000447	8.00E-05	7.00E-06	0.00021	0	9.00E-06
P09411;S4R2M7;P09041 [Phosphoglycerate kinase 1;Phosphoglycerate kinase ...]	1.448332348	3.78735373	-1.097685494	-0.665466913	-0.116121303	-0.276284122	0.82681778	-0.272148517	2.339021382	-2.546017842	-2.113799261	-1.564453651	-1.72461647	-0.621514568	-1.720480865	-4.885039224	-4.452820643	-3.903475033	-4.063637852	-2.96053595	-4.059502247	0.432218581	0.98156419	0.821401372	1.924503274	0.825536977	0.54934561	0.389182791	1.492284693	0.393318396	-0.160162819	0.942939083	-0.156027214	1.103101902	0.004135605	-1.098966297	0	0	0.036991	0.549595	0.000114	0.000525	0	0.000447	0	0	2.00E-06	0	0
P09528;A0A494BA92;A0A494B9D4;A0A494BAP3 [Ferritin heavy chain;Ferritin heavy chain, N-termi ...]	1.26823759	4.119277367	-0.126799934	-0.292993685	-0.63460232	0.694601438	-0.14406778	0.698737043	2.851039777	-1.395037523	-1.561231274	-1.90283991	-0.573636151	-1.41230537	-0.569500547	-4.246077301	-4.412271052	-4.753879687	-3.424675929	-4.263345147	-3.420540324	-0.166193751	-0.507802387	0.821401372	-0.017267846	0.825536977	-0.341608635	0.987595123	0.148925905	0.991730728	1.329203758	0.49053454	1.333339363	-0.838669218	0.004135605	0.842804823	1.00E-06	0	0.000374	7.00E-06	0	1.00E-06	0.000127	1.00E-06	0	0	0	0	0.000154
P09813 [Apolipoprotein A-II;Proapolipoprotein A-II ...]	1.395139853	0	5.009593245	2.183159785	0	5.865003125	0	0.069444444	-1.395139853	3.614453392	0.788019932	-1.395139853	4.469863272	-1.395139853	-1.325695409	5.009593245	2.183159785	0	5.865003125	0	0.069444444	-2.82643346	-5.009593245	0.855409881	-5.009593245	-4.9401488	-2.183159785	3.681843341	-2.183159785	-2.11371534	5.865003125	0	0.069444444	-5.865003125	-5.795558681	0.069444444	6.80E-05	1	0	1.20E-05	1	0	1	0.481152	6.50E-05	0	0.040781	6.30E-05	0
P0DM31 [ ...]	-0.665805275	-1.290583481	2.739189725	-0.651104388	-0.672366794	-0.55661214	-0.657432662	-0.54448562	-0.624778206	3.404995	0.014700887	-0.006561519	0.109193135	0.008372613	0.121319655	4.029773205	0.639479092	0.618216686	0.733971341	0.633150819	0.746097861	-3.390294113	-3.411556519	-3.295801864	-3.396622386	-3.283675344	-0.021262406	0.094492249	-0.006328273	0.106618769	0.115754655	0.014934133	0.127881175	-0.100820522	0.01212652	0.112947042	0.435437	0.18253	0.173065	0.440753	0.411392	0.529923	0.394797	0.523019	0.719489	0.015206	1	1	0.999999
P0DOV2;A0A087WRA4;D0QMC3 [Myeloid cell nuclear differentiation antigen-like ...]	-0.024573056	0.957874194	-0.003490218	-0.003823267	-0.023847091	0.140399124	-0.009147249	0.142063095	0.98244725	0.021082837	0.020749789	0.000725964	0.16497218	0.015425807	0.166636151	-0.961364412	-0.961697461	-0.981721285	-0.81747507	-0.967021443	-0.815811099	-0.000333049	-0.020356873	0.143889343	-0.00565703	0.145553314	-0.020023824	0.144222391	-0.005323982	0.145886362	0.164246216	0.014699843	0.165910187	-0.149546373	0.001663971	0.151210344	1	0.544436	1	1	1	1	1	1	0.524167	1	1	1	0.999999
P0DP28;P0DP27;P0DP26;Q3UKW2;A0A3Q4EHJ0;A0A1Y7VK66;Q9D6P8;P20801 [Calmodulin-like protein 3 ...]	-0.663382923	1.49059911	-0.126799934	-0.292993685	3.266259356	1.898712795	-0.14406778	0.698737043	2.153982033	0.536582989	0.370389238	3.929642278	2.562095718	0.519315143	1.362119966	-1.617399044	-1.783592795	1.775660245	0.408113684	-1.63466689	-0.791862068	-0.166193751	3.393059289	2.025512728	-0.017267846	0.825536977	3.55925304	2.191706479	0.148925905	0.991730728	-1.367546561	-3.410327136	-2.567522313	-2.042780575	-1.199975752	0.842804823	0	0	0.000374	7.00E-06	0	1.00E-06	0.000127	1.00E-06	0	1.00E-06	2.80E-05	0	0
P10107;A0A494BBD8 [Annexin A1 ...]	4.392673377	6.454823647	2.602406517	4.081237718	2.114370864	0.361483964	0.189049694	0.365619569	2.06215027	-1.79026686	-0.311435659	-2.278302513	-4.031189413	-4.203623683	-4.027053808	-3.85241713	-2.373585929	-4.340452783	-6.093339683	-6.265773953	-6.089204078	1.478831201	-0.488035653	-2.240922553	-2.413356823	-2.236786948	-1.966866854	-3.719753754	-3.892188025	-3.715618149	-1.7528869	-1.92532117	-1.748751295	-0.172434271	0.004135605	0.176569875	0	0	4.00E-06	0	6.00E-06	0.069329	0.328912	0.065471	1.70E-05	5.70E-05	0.328531	7.00E-06	0
P10126;D3Z3I8;D3YZ68;P62631 [Elongation factor 1-alpha 1;Elongation factor 1-al ...]	-1.947242247	0.177968244	-0.520041535	-1.106879189	0.741164919	-1.524207412	1.335361891	-0.277278249	2.125210491	1.427200712	0.840363058	2.688407165	0.423034835	3.282604138	1.669963998	-0.69800978	-1.284847434	0.563196674	-1.702175656	1.157393646	-0.455246493	-0.586837654	1.261206454	-1.004165877	1.855403426	0.242763286	1.848044108	-0.417328223	2.44224108	0.82960094	-2.265372331	0.594196972	-1.018443168	2.859569303	1.246929163	-1.61264014	0.000112	0	2.00E-06	0.007316	0	0.229571	0	0	0	0	1.30E-05	0	0.016947
P10605 [Cathepsin B;Cathepsin B light chain;Cathepsin B he ...]	0	1.802770012	0	0	0	0.055555556	0	0.069444444	1.802770012	0	0	0	0.055555556	0	0.069444444	-1.802770012	-1.802770012	-1.802770012	-1.747214456	-1.802770012	-1.733325567	0	0	0.055555556	0	0.069444444	0	0.055555556	0	0.069444444	0.055555556	0	0.069444444	-0.055555556	0.013888889	0.069444444	1	1	1	1	1	1	1	1	1	1	1	1	0.999999
P10639 [Thioredoxin ...]	0.242655371	-0.136460581	1.452645394	1.688925657	2.10292475	-1.820845953	0.465591687	-1.793586411	-0.379115952	1.209990022	1.446270285	1.860269379	-2.063501324	0.222936316	-2.036241782	1.589105975	1.825386237	2.239385331	-1.684385372	0.602052268	-1.65712583	0.236280263	0.650279357	-3.273491346	-0.987053706	-3.246231805	0.413999094	-3.509771609	-1.223333969	-3.482512068	-3.923770703	-1.637333063	-3.896511161	2.28643764	0.027259542	-2.259178099	0.08052	0.458119	0.000508	0.000135	2.80E-05	0.008208	0.022485	0.009119	0.120497	0.000324	7.40E-05	8.00E-06	5.30E-05
P10810 [Monocyte differentiation antigen CD14 ...]	-0.419867454	1.670175594	-0.126799934	-0.292993685	-0.63460232	0.694601438	-0.14406778	0.698737043	2.090043048	0.293067521	0.12687377	-0.214734866	1.114468892	0.275799674	1.118604497	-1.796975527	-1.963169278	-2.304777914	-0.975574156	-1.814243374	-0.971438551	-0.166193751	-0.507802387	0.821401372	-0.017267846	0.825536977	-0.341608635	0.987595123	0.148925905	0.991730728	1.329203758	0.49053454	1.333339363	-0.838669218	0.004135605	0.842804823	1.90E-05	0	0.000164	2.00E-06	0	1.00E-06	5.00E-05	0	0	0.002319	0.133362	0.013839	0
P11031 [Activated RNA polymerase II transcriptional coacti ...]	0	1.071316752	0	0	0	0.055555556	0	0.069444444	1.071316752	0	0	0	0.055555556	0	0.069444444	-1.071316752	-1.071316752	-1.071316752	-1.015761196	-1.071316752	-1.001872308	0	0	0.055555556	0	0.069444444	0	0.055555556	0	0.069444444	0.055555556	0	0.069444444	-0.055555556	0.013888889	0.069444444	1	1	1	1	1	1	1	1	1	1	1	1	0.999999
P11247;F7DC05;F8WGZ9;A0A0A0MQL9 [Myeloperoxidase;Myeloperoxidase light chain;Myelop ...]	4.198716602	6.467439657	2.029740409	4.114633943	0.961829037	0.694601438	-0.14406778	0.698737043	2.268723055	-2.168976193	-0.084082659	-3.236887565	-3.504115164	-4.342784382	-3.499979559	-4.437699247	-2.352805713	-5.505610619	-5.772838219	-6.611507437	-5.768702614	2.084893534	-1.067911372	-1.335138971	-2.17380819	-1.331003367	-3.152804906	-3.420032505	-4.258701723	-3.415896901	-0.267227599	-1.105896817	-0.263091994	-0.838669218	0.004135605	0.842804823	0	0	0	0	8.50E-05	7.00E-06	0.00075	6.00E-06	0	0	0.517613	0	0
P11499;E9PX27;E9Q3D6;D3Z1R1;E9Q0C3 [Heat shock protein HSP 90-beta ...]	-2.18142149	-1.160345499	-2.741690828	-2.092044107	0.311347342	-2.929736005	1.245805751	-2.9256004	1.021075991	-0.560269339	0.089377382	2.492768831	-0.748314515	3.427227241	-0.74417891	-1.581345329	-0.931698608	1.471692841	-1.769390506	2.40615125	-1.765254901	0.649646721	3.05303817	-0.188045177	3.98749658	-0.183909572	2.403391449	-0.837691898	3.337849859	-0.833556293	-3.241083346	0.93445841	-3.236947742	4.175541756	0.004135605	-4.171406151	0.000174	0.717777	0.00058	0.000395	4.80E-05	2.00E-06	0	2.00E-06	5.50E-05	0.080911	0.765882	1.00E-06	0.000559
P11589 [Major urinary protein 2 ...]	2.053381485	-5.830566428	0.936534729	0.892830377	0.769666627	1.053749283	-1.113359747	1.216845024	-7.883947913	-1.116846755	-1.160551108	-1.283714858	-0.999632202	-3.166741232	-0.836536461	6.767101157	6.723396805	6.600233055	6.884315711	4.717206681	7.047411452	-0.043704352	-0.166868102	0.117214553	-2.049894476	0.280310294	-0.12316375	0.160918906	-2.006190124	0.324014647	0.284082656	-1.883026374	0.447178397	-2.16710903	0.163095741	2.330204771	7.60E-05	0	0.287021	0.153298	0.027618	0.94223	0	0.656641	0	2.20E-05	2.10E-05	6.00E-06	4.50E-05
P11679;CON__Q9H552 [Keratin, type II cytoskeletal 8 ...]	-0.923151415	-2.7594789	-1.745414478	-1.6154943	-0.596174912	-1.233325578	0.28869585	-1.191602331	-1.836327485	-0.822263064	-0.692342885	0.326976503	-0.310174164	1.211847264	-0.268450917	1.014064421	1.1439846	2.163303988	1.526153321	3.048174749	1.567876568	0.129920178	1.149239566	0.5120889	2.034110328	0.553812147	1.019319388	0.382168721	1.904190149	0.423891968	-0.637150667	0.884870761	-0.59542742	1.522021428	0.041723247	-1.480298181	0.006423	1.00E-06	0.000191	4.30E-05	0.146994	0.000688	0.009692	0.003046	1.10E-05	0.005093	0.004071	0.127591	0.180552
P11680 [Properdin ...]	-0.024414249	-1.206643728	-0.097208193	0.347305984	-1.701978371	-1.537732155	-1.687278528	-1.536068184	-1.182229479	-0.072793944	0.371720234	-1.677564121	-1.513317906	-1.662864279	-1.511653935	1.109435536	1.553949713	-0.495334642	-0.331088427	-0.4806348	-0.329424456	0.444514177	-1.604770178	-1.440523962	-1.590070335	-1.438859991	-2.049284355	-1.885038139	-2.034584512	-1.883374168	0.164246216	0.014699843	0.165910187	-0.149546373	0.001663971	0.151210344	0.202864	0.028047	0.191742	0.346428	0.013301	0.019091	0.013017	0.018511	0.406848	1	1	0.210794	0.284911
P11983 [T-complex protein 1 subunit alpha ...]	-1.451357391	-1.007111517	-1.181775758	-1.258232501	0.05816514	-0.630972919	1.000086299	-0.654195253	0.444245874	0.269581633	0.19312489	1.509522531	0.820384473	2.45144369	0.797162138	-0.174664241	-0.251120984	1.065276657	0.376138598	2.007197816	0.352916264	-0.076456743	1.239940899	0.55080284	2.181862057	0.527580505	1.316397641	0.627259583	2.2583188	0.604037248	-0.689138059	0.941921159	-0.712360394	1.631059217	-0.023222335	-1.654281552	0.763326	1	1	1	0.227383	0.905032	0.02234	0.924998	0.698722	0.967881	1	0.083481	0.399969
P12246 [Serum amyloid P-component ...]	0.382763085	-0.94576936	-0.94576936	-0.94576936	-0.94576936	-0.890213804	-0.94576936	-0.876324915	-1.328532445	-1.328532445	-1.328532445	-1.328532445	-1.27297689	-1.328532445	-1.259088001	0	0	0	0.055555556	0	0.069444444	0	0	0.055555556	0	0.069444444	0	0.055555556	0	0.069444444	0.055555556	0	0.069444444	-0.055555556	0.013888889	0.069444444	1	1	1	1	1	1	1	1	1	1	1	1	0.999999
P12787 [Cytochrome c oxidase subunit 5A, mitochondrial ...]	0	2.075057153	0	0	0	0.055555556	0	0.069444444	2.075057153	0	0	0	0.055555556	0	0.069444444	-2.075057153	-2.075057153	-2.075057153	-2.019501597	-2.075057153	-2.005612709	0	0	0.055555556	0	0.069444444	0	0.055555556	0	0.069444444	0.055555556	0	0.069444444	-0.055555556	0.013888889	0.069444444	1	1	1	1	1	1	1	1	1	1	1	1	0.999999
P12970 [60S ribosomal protein L7a ...]	-0.729951928	-0.164701411	-0.460370296	0.098877449	0.445087012	0.090432544	0.278680836	0.067210209	0.565250518	0.269581633	0.828829377	1.17503894	0.820384473	1.008632764	0.797162138	-0.295668885	0.263578859	0.609788423	0.255133955	0.443382247	0.23191162	0.559247744	0.905457308	0.55080284	0.739051132	0.527580505	0.346209563	-0.008444904	0.179803387	-0.031667239	-0.354654468	-0.166406176	-0.377876803	0.188248292	-0.023222335	-0.211470627	0.889327	1	1	1	0.651637	0.986025	0.767474	1	0.719395	1	0.578686	0.342122	0.58104
P13020;A0A0J9YUQ8;CON__Q3SX14;A6PWS5;A0A0J9YUJ8 [Gelsolin ...]	-0.869789155	-1.342140334	0.192798601	-0.697557962	0.045884809	-0.02627554	0.048388693	0.111907918	-0.472351179	1.062587756	0.172231193	0.915673964	0.843513615	0.918177847	0.981697072	1.534938935	0.644582372	1.388025143	1.315864794	1.390529026	1.454048251	-0.890356563	-0.146913792	-0.219074141	-0.144409909	-0.080890684	0.743442771	0.671282422	0.745946654	0.809465879	-0.072160349	0.002503884	0.066023109	0.074664232	0.138183457	0.063519225	0.015105	0.00081	0.649719	0.046228	0.952985	1	0.978806	0.854575	0.13915	0.005906	0.753961	0.008187	0.013243
P13634;D3YYQ4 [Carbonic anhydrase 1 ...]	-0.663382923	-0.536176943	-0.126799934	2.822639879	-0.63460232	0.694601438	-0.14406778	0.698737043	0.12720598	0.536582989	3.486022802	0.028780603	1.357984361	0.519315143	1.362119966	0.409377009	3.358816822	-0.098425377	1.230778381	0.392109163	1.234913986	2.949439813	-0.507802387	0.821401372	-0.017267846	0.825536977	-3.4572422	-2.128038441	-2.966707659	-2.123902837	1.329203758	0.49053454	1.333339363	-0.838669218	0.004135605	0.842804823	0	7.50E-05	0.000374	0	0	1.00E-06	0.000127	1.00E-06	0.323275	1.00E-06	0	0.70391	0
P14069 [Protein S100-A6 ...]	-3.24539181	-3.549006491	-0.236811088	-1.605074031	2.044603052	-0.821190665	1.561583299	0.272753548	-0.303614681	3.008580722	1.640317779	5.289994862	2.424201145	4.80697511	3.518145358	3.312195403	1.94393246	5.593609543	2.727815826	5.11058979	3.821760039	-1.368262943	2.28141414	-0.584379577	1.798394388	0.509564636	3.649677083	0.783883366	3.166657331	1.877827579	-2.865793717	-0.483019753	-1.771849504	2.382773964	1.093944212	-1.288829752	0.000189	2.00E-06	0.000164	1	0	0.027672	0	6.00E-06	0.376805	2.00E-06	0.000206	0	4.10E-05
P14115 [60S ribosomal protein L27a ...]	-0.563298743	-3.044583037	-3.044583037	-0.260016567	1.425170012	-2.989027482	3.044583037	-2.975138593	-2.481284294	-2.481284294	0.303282176	1.988468755	-2.425728739	3.60788178	-2.41183985	0	2.78456647	4.469753049	0.055555556	6.089166075	0.069444444	2.78456647	4.469753049	0.055555556	6.089166075	0.069444444	1.685186579	-2.729010915	3.304599605	-2.715122026	-4.414197494	1.619413025	-4.400308605	6.033610519	0.013888889	-6.01972163	0	1	1	0	0	0.643403	0	0.481152	0	0	0.001614	0	0
P14131 [40S ribosomal protein S16 ...]	-0.185278331	0.35210752	-0.420445463	-0.586639214	0.472697055	0.400955909	0.149577749	0.405091514	0.537385851	-0.235167132	-0.401360883	0.657975386	0.58623424	0.33485608	0.590369845	-0.772552983	-0.938746734	0.120589535	0.048848389	-0.202529771	0.052983994	-0.166193751	0.893142518	0.821401372	0.570023212	0.825536977	1.059336269	0.987595123	0.736216963	0.991730728	-0.071741146	-0.323119306	-0.067605541	-0.25137816	0.004135605	0.255513765	0.999429	0.006647	0.036991	0.002433	0.000186	0.000525	0.134227	0.000447	0.004905	0.062682	0.004528	0.000134	0.000334
P14148;F6XI62 [60S ribosomal protein L7 ...]	-1.262941641	-0.057079321	-1.014442846	-1.09056654	-0.938583939	-0.551973793	0.845390854	-0.56297121	1.205862321	0.248498795	0.172375101	0.324357703	0.710967848	2.108332495	0.699970431	-0.957363525	-1.03348722	-0.881504618	-0.494894473	0.902470174	-0.50589189	-0.076123694	0.075858907	0.462469053	1.8598337	0.451471636	0.151982601	0.538592747	1.935957394	0.52759533	0.386610146	1.783974793	0.375612729	1.397364647	-0.010997417	-1.408362064	1	0.844672	1	1	1	1	0.569561	1	0.698722	1	1	1	0.961712
P14152 [Malate dehydrogenase, cytoplasmic ...]	-1.133253803	0.166308914	1.014373729	0.615829955	-0.143659873	-0.138606848	0.689140506	-0.134471243	1.299562717	2.147627532	1.749083758	0.98959393	0.994646955	1.822394309	0.998782559	0.848064815	0.44952104	-0.309968787	-0.304915762	0.522831592	-0.300780158	-0.398543774	-1.158033602	-1.152980577	-0.325233223	-1.148844972	-0.759489828	-0.754436803	0.073310551	-0.750301198	0.005053025	0.832800379	0.00918863	0.827747354	0.004135605	-0.82361175	0.01125	0.000187	0	0	0.055719	0.000311	0	0.00026	3.90E-05	0	1.00E-06	0.004098	4.60E-05
P14206;A0A1L1SRW0;A0A1L1SUK3 [40S ribosomal protein SA ...]	-0.351376772	-0.005040304	-0.048441736	-0.138661749	0.829815772	0.404832876	-0.072187811	0.432092418	0.346336468	0.302935036	0.212715024	1.181192544	0.756209648	0.279188961	0.78346919	-0.043401432	-0.133621445	0.834856076	0.40987318	-0.067147507	0.437132722	-0.090220012	0.878257508	0.453274612	-0.023746075	0.480534154	0.968477521	0.543494625	0.066473937	0.570754166	-0.424982896	-0.902003583	-0.397723354	-0.477020687	0.027259542	0.504280229	0.822881	1	1	1	0.484688	0.959886	1	0.924998	0.808141	0.967881	1	0.223068	0.505032
P14211 [Calreticulin ...]	-0.526165439	0.85972784	-0.4939349	1.52143739	-1.001737287	0.327466472	-0.511202746	0.331602076	1.385893279	0.032230538	2.047602829	-0.475571848	0.85363191	0.014962692	0.857767515	-1.353662741	0.66170955	-1.861465127	-0.532261369	-1.370930587	-0.528125764	2.01537229	-0.507802387	0.821401372	-0.017267846	0.825536977	-2.523174677	-1.193970919	-2.032640137	-1.189835314	1.329203758	0.49053454	1.333339363	-0.838669218	0.004135605	0.842804823	0.00135	0.157382	0.000698	0.007709	1.80E-05	0.535234	0.000352	0.535686	4.00E-05	1	5.30E-05	0.019604	0.000552
P14602;D3YZ06 [Heat shock protein beta-1 ...]	-2.083785308	-2.810730265	-1.385705886	-1.911410207	0.113033878	-1.37281746	1.66623452	-1.383814877	-0.726944957	0.698079422	0.172375101	2.196819186	0.710967848	3.750019829	0.699970431	1.425024379	0.899320058	2.923764143	1.437912805	4.476964785	1.426915388	-0.525704321	1.498739764	0.012888426	3.051940406	0.001891009	2.024444085	0.538592747	3.577644727	0.52759533	-1.485851338	1.553200642	-1.496848755	3.03905198	-0.010997417	-3.050049397	1	0.71189	1	1	0.537644	1	0.154671	1	0.864828	0.986789	1	0.400297	0.964493
P14685;F7B7L8 [26S proteasome non-ATPase regulatory subunit 3 ...]	-0.663382923	-0.735942352	-0.126799934	-0.292993685	-0.072543199	0.694601438	-0.14406778	0.698737043	-0.072559429	0.536582989	0.370389238	0.590839724	1.357984361	0.519315143	1.362119966	0.609142419	0.442948668	0.663399154	1.43054379	0.591874572	1.434679395	-0.166193751	0.054256735	0.821401372	-0.017267846	0.825536977	0.220450486	0.987595123	0.148925905	0.991730728	0.767144637	-0.071524581	0.771280242	-0.838669218	0.004135605	0.842804823	0	0	0.000374	7.00E-06	0.001251	1.00E-06	0.000127	1.00E-06	0.242239	1.00E-06	2.80E-05	1.00E-06	0
P14733;A0A0R4J0Q5;P21619 [Lamin-B1 ...]	0.321877768	0.38867349	0.219115702	0.031439304	-0.63460232	0.694601438	-0.14406778	0.698737043	0.066795721	-0.102762066	-0.290438464	-0.956480089	0.37272367	-0.465945548	0.376859274	-0.169557788	-0.357234185	-1.02327581	0.305927948	-0.53274127	0.310063553	-0.187676398	-0.853718022	0.475485736	-0.363183482	0.479621341	-0.666041625	0.663162134	-0.175507084	0.667297738	1.329203758	0.49053454	1.333339363	-0.838669218	0.004135605	0.842804823	0.004093	0.001036	0.577183	0.270207	0	1.00E-06	0.000127	1.00E-06	0.308744	0.334927	0.007096	0	2.60E-05
P15864;P43277;I7HFT9;Q07133 [Histone H1.2;Histone H1.3 ...]	2.98105175	4.084947281	1.236647954	3.051798523	1.434290656	-0.234094439	0.173762753	-0.472158769	1.103895531	-1.744403796	0.070746773	-1.546761094	-3.215146189	-2.807288997	-3.453210519	-2.848299327	-1.033148758	-2.650656626	-4.31904172	-3.911184528	-4.55710605	1.815150569	0.197642702	-1.470742392	-1.062885201	-1.708806723	-1.617507868	-3.285892962	-2.87803577	-3.523957292	-1.668385094	-1.260527903	-1.906449424	0.407857191	-0.23806433	-0.645921521	0	0	0.000272	0	3.90E-05	1	0.178092	0.300298	0.000716	3.00E-05	1	6.00E-05	0
P15947;A0A0U1RPN5;P15945;P00757;Q61759;P15946 [Kallikrein-1 ...]	2.41236623	-4.378757877	0.509690784	2.089983015	0.511060878	1.981104683	-1.012891459	3.936958073	-6.791124106	-1.902675446	-0.322383214	-1.901305352	-0.431261547	-3.425257689	1.524591843	4.88844866	6.468740892	4.889818755	6.35986256	3.365866417	8.31571595	1.580292232	0.001370094	1.471413899	-1.522582243	3.427267289	-1.578922137	-0.108878332	-3.102874475	1.846975058	1.470043805	-1.523952338	3.425897195	-2.993996143	1.95585339	4.949849532	0.017943	1.00E-06	0.470119	0.075196	0.420704	0.092249	0.001769	0.000151	0	0.003212	0.754216	0.003043	0.532027
P16015 [Carbonic anhydrase 3 ...]	-1.582042735	-3.244352894	1.128858766	-1.492714303	-2.295526395	-1.984824753	0.376524845	-1.980689148	-1.662310159	2.710901501	0.089328432	-0.71348366	-0.402782018	1.95856758	-0.398646413	4.37321166	1.75163859	0.948826499	1.259528141	3.620877739	1.263663746	-2.621573069	-3.424385161	-3.113683519	-0.752333921	-3.109547914	-0.802812091	-0.49211045	1.869239148	-0.487974845	0.310701642	2.67205124	0.314837247	2.361349598	0.004135605	-2.357213993	1.00E-05	0	4.00E-06	4.70E-05	0	1.00E-06	0.000286	1.00E-06	0	0	0.740334	0.000163	0.007997
P16045 [Galectin-1 ...]	-0.576650987	0.110319236	0.563813701	-1.411731055	-1.75333969	-0.424135932	-1.26280515	-0.420000327	0.686970223	1.140464688	-0.835080068	-1.176688703	0.152515055	-0.686154163	0.15665066	0.453494465	-1.522050291	-1.863658926	-0.534455168	-1.373124386	-0.530319563	-1.975544756	-2.317153391	-0.987949633	-1.826618851	-0.983814028	-0.341608635	0.987595123	0.148925905	0.991730728	1.329203758	0.49053454	1.333339363	-0.838669218	0.004135605	0.842804823	0	1.00E-06	0.000953	0	0	0	0	0	0.000164	2.50E-05	5.00E-05	2.00E-06	0.293997
P16125;A0A0N4SVV8;D3Z7F0 [L-lactate dehydrogenase B chain;L-lactate dehydrog ...]	-2.82535711	-5.603296264	-2.799262231	-3.67822681	1.137497907	-3.107969317	1.676459608	-1.841940207	-2.777939154	0.026094879	-0.8528697	3.962855018	-0.282612207	4.501816718	0.983416903	2.804034033	1.925069454	6.740794171	2.495326947	7.279755872	3.761356057	-0.878964579	3.936760138	-0.308707086	4.475721839	0.957322024	4.815724717	0.570257493	5.354686418	1.836286603	-4.245467224	0.5389617	-2.979438114	4.784428925	1.26602911	-3.518399815	0.019304	3.00E-06	0.074158	0.000743	4.50E-05	0.005866	1.30E-05	1	5.70E-05	1	0.074969	3.00E-06	0.673165
P17156 [Heat shock-related 70 kDa protein 2 ...]	-1.823261768	-0.685324391	-1.087651656	-2.365314691	-0.421503142	-1.85059601	1.23757505	-1.488938368	1.137937377	0.735610112	-0.542052923	1.401758626	-0.027334242	3.060836818	0.3343234	-0.402327265	-1.679990299	0.26382125	-1.165271619	1.922899442	-0.803613977	-1.277663035	0.666148514	-0.762944354	2.325226706	-0.401286712	1.943811549	0.514718681	3.602889741	0.876376323	-1.429092868	1.659078192	-1.067435227	3.08817106	0.361657642	-2.726513418	0.118077	0.131572	1	0.005929	0.030498	0.333521	2.30E-05	0.924998	0.005444	0.079814	0.155091	0.001459	0.999999
P17182;Q6PHC1;B1ARR7;B0QZL1;A0A0N4SUI6;B1ARR6;Q5SX61;Q5SX60;D3YVD3;D3Z2S4;J3QPZ9;Q5SX59;D3Z6E4;A0A0N4SUX5;P17183 [Alpha-enolase ...]	2.591095161	4.174310553	0.9471413	3.510797934	2.206296516	0.331339741	-0.507329477	0.335475346	1.583215392	-1.643953861	0.919702773	-0.384798645	-2.25975542	-3.098424638	-2.255619815	-3.227169253	-0.663512619	-1.968014037	-3.842970812	-4.68164003	-3.838835207	2.563656634	1.259155217	-0.615801559	-1.454470777	-0.611665954	-1.304501418	-3.179458193	-4.018127411	-3.175322588	-1.874956775	-2.713625993	-1.870821171	-0.838669218	0.004135605	0.842804823	1.60E-05	0	0.408274	1.00E-06	0.000151	0.750083	0.002489	0.763889	6.80E-05	0.000818	0.000443	0.127823	0
P17563;Q63836;G3UYY2;A0A0R4J135;D6RHN2 [Selenium-binding protein 1;Selenium-binding protei ...]	-0.330358131	0.400371913	-0.042273937	0.153464414	-0.305765173	0.372213937	-0.059541784	0.401235848	0.730730045	0.288084194	0.483822545	0.024592958	0.702572068	0.270816348	0.731593979	-0.442645851	-0.2469075	-0.706137086	-0.028157976	-0.459913697	0.000863934	0.195738351	-0.263491236	0.414487875	-0.017267846	0.443509785	-0.459229587	0.218749523	-0.213006197	0.247771434	0.67797911	0.246223389	0.707001021	-0.431755721	0.029021911	0.460777631	1	1	1	1	1	1	1	1	0.849499	1	1	1	0.955981
P17742;A0A1L1SST0;V9GXC1;V9GX31 [Peptidyl-prolyl cis-trans isomerase A;Peptidyl-pro ...]	0.541239449	0.933944977	-0.923043282	-2.658992615	0.909346822	-2.294583068	0.300859865	-2.290447463	0.392705528	-1.46428273	-3.200232064	0.368107373	-2.835822517	-0.240379584	-2.831686912	-1.856988258	-3.592937592	-0.024598155	-3.228528045	-0.633085112	-3.22439244	-1.735949334	1.832390103	-1.371539786	1.223903146	-1.367404182	3.568339437	0.364409547	2.95985248	0.368545152	-3.20392989	-0.608486957	-3.199794285	2.595442933	0.004135605	-2.591307328	0.01943	0.002925	0.078405	6.60E-05	0.002197	7.50E-05	0.073414	6.60E-05	0.286664	0.00048	6.00E-06	0.281797	3.00E-06
P17751;H7BXC3 [Triosephosphate isomerase ...]	-1.77553176	-1.360966232	-1.620296271	0.261864473	1.05089696	-2.308275363	1.268333016	-0.741497905	0.414565528	0.155235489	2.037396233	2.82642872	-0.532743603	3.043864776	1.034033855	-0.259330039	1.622830705	2.411863192	-0.947309131	2.629299248	0.619468327	1.882160744	2.671193231	-0.687979092	2.888629287	0.878798366	0.789032487	-2.570139836	1.006468543	-1.003362378	-3.359172323	0.217436056	-1.792394865	3.576608379	1.566777458	-2.009830921	0.002381	0.58827	0.022105	6.50E-05	0	1.20E-05	0	0.134105	0.007814	0.315246	9.00E-06	0	0.001751
P19221;H7BX99;CON__P00735 [Prothrombin;Activation peptide fragment 1;Activati ...]	0.396252975	-2.515755745	0.729287503	0.292561525	-2.067935862	-1.214606829	-2.053276047	1.664285964	-2.912008719	0.333034528	-0.103691449	-2.464188836	-1.610859804	-2.449529022	1.268032989	3.245043248	2.80831727	0.447819883	1.301148916	0.462479697	4.180041708	-0.436725977	-2.797223365	-1.943894332	-2.78256355	0.934998461	-2.360497387	-1.507168354	-2.345837573	1.371724438	0.853329033	0.014659815	3.732221825	-0.838669218	2.878892793	3.717562011	0	0	1.60E-05	0	0	0	0	0.094413	0	0.050285	0.487768	0	0
P19783 [Cytochrome c oxidase subunit 4 isoform 1, mitochon ...]	-0.984990188	-0.771104233	-2.095762098	-2.096245102	-2.137531333	-1.913086018	2.064310805	-1.913184416	0.213885955	-1.11077191	-1.111254914	-1.152541144	-0.92809583	3.049300993	-0.928194228	-1.324657865	-1.325140869	-1.366427099	-1.141981785	2.835415038	-1.142080183	-0.000483004	-0.041769234	0.18267608	4.160072903	0.182577682	-0.04128623	0.183159085	4.160555907	0.183060687	0.224445315	4.201842137	0.224346917	3.977396823	-9.84E-05	-3.977495221	0	0	0.001496	0.001045	1.00E-06	0	0	0	2.10E-05	0	0	0	0
P20029 [78 kDa glucose-regulated protein ...]	-0.906762178	0.486150825	0.714972636	-1.326060852	-1.667669487	-0.338465729	0.888999387	-0.334330124	1.392913003	1.621734813	-0.419298674	-0.760907309	0.568296449	1.795761564	0.572432054	0.22882181	-1.812211677	-2.153820312	-0.824616554	0.402848561	-0.820480949	-2.041033487	-2.382642122	-1.053438364	0.174026751	-1.049302759	-0.341608635	0.987595123	2.215060238	0.991730728	1.329203758	2.556668874	1.333339363	1.227465115	0.004135605	-1.223329511	1	2.00E-06	0.000548	0.002433	3.30E-05	0.000525	0	0.000447	2.00E-06	0.000355	0.003691	4.90E-05	0.000451
P20065 [Thymosin beta-4;Hematopoietic system regulatory pe ...]	1.444850778	0.29604798	-2.051556539	1.407840124	1.53064876	-1.478951589	0.99217269	-2.71068286	-1.148802798	-3.496407318	-0.037010654	0.085797981	-2.923802367	-0.452678088	-4.155533638	-2.347604519	1.111792144	1.23460078	-1.774999569	0.69612471	-3.00673084	3.459396663	3.582205299	0.57260495	3.04372923	-0.659126321	0.122808636	-2.886791713	-0.415667434	-4.118522984	-3.009600349	-0.538476069	-4.24133162	2.471124279	-1.231731271	-3.70285555	0	0	0.002429	0	0	0.075527	0	0	1.00E-06	0	1	0.516919	0
P20152;A0A0A6YWC8;A2AKJ2;P31001;D3YZ35;A0A0R4J036;P46660;P08551;P08553 [Vimentin ...]	0.734945234	2.577913494	1.112763254	2.013050887	2.357264595	-0.374665853	-1.421197551	1.387629491	1.84296826	0.377818019	1.278105653	1.622319361	-1.109611087	-2.156142785	0.652684256	-1.465150241	-0.564862608	-0.220648899	-2.952579347	-3.999111045	-1.190284004	0.900287633	1.244501341	-1.487429106	-2.533960804	0.274866237	0.344213708	-2.38771674	-3.434248438	-0.625421396	-2.731930448	-3.778462146	-0.969635104	-1.046531698	1.762295344	2.808827042	0.091595	0.007275	0.772174	0.146431	0.023717	0.021208	0.001005	1	0.000389	0.59184	0.00495	0.000946	0.147206
P20918;CON__P06868 [Plasminogen;Plasmin heavy chain A;Activation pepti ...]	1.568314256	-0.156886493	1.558231301	0.684725471	-1.208941037	1.848397383	-2.406013992	-1.563209169	-1.725200749	-0.010082955	-0.883588785	-2.777255293	0.280083127	-3.974328248	-3.131523425	1.715117794	0.841611964	-1.052054544	2.005283876	-2.249127499	-1.406322676	-0.87350583	-2.767172338	0.290166082	-3.964245293	-3.12144047	-1.893666507	1.163671913	-3.090739462	-2.24793464	3.05733842	-1.197072955	-0.354268132	-4.254411375	-3.411606552	0.842804823	0.00357	1.00E-06	0.010714	2.80E-05	0	0.045476	0	0	2.00E-05	1	0.003151	1.00E-06	0.362049
P21550 [Beta-enolase ...]	1.316294452	3.836934902	0.324867326	-0.6385841	-0.67987033	-0.455425015	-0.650236354	-0.455523413	2.52064045	-0.991427126	-1.954878552	-1.996164782	-1.771719467	-1.966530807	-1.771817865	-3.512067576	-4.475519001	-4.516805232	-4.292359917	-4.487171256	-4.292458315	-0.963451425	-1.004737656	-0.780292341	-0.97510368	-0.780390739	-0.04128623	0.183159085	-0.011652255	0.183060687	0.224445315	0.029633975	0.224346917	-0.19481134	-9.84E-05	0.194712941	5.00E-06	0	0.005969	0	0	0	0	0	0	0	0	0	0
P21614;A0A0G2JGM6 [Vitamin D-binding protein ...]	1.424958102	0.635544703	1.869219637	-0.364561927	-1.9228902	0.649753393	-2.415243395	0.884468171	-0.7894134	0.444261535	-1.789520029	-3.347848303	-0.775204709	-3.840201497	-0.540489931	1.233674935	-1.000106629	-2.558434903	0.01420869	-3.050788097	0.248923469	-2.233781564	-3.792109838	-1.219466244	-4.284463032	-0.984751466	-1.558328274	1.014315319	-2.050681468	1.249030098	2.572643593	-0.492353195	2.807358372	-3.064996788	0.234714778	3.299711566	0.012804	0.000245	0.172024	1.10E-05	0	0.000347	2.00E-06	0.000799	0.037749	0.272503	0.000335	2.00E-06	0.0432
P21981;G3UXE8 [Protein-glutamine gamma-glutamyltransferase 2 ...]	-0.357597847	1.021835729	-0.088016215	-0.164472958	-0.352684239	0.462786625	-0.093673245	0.43956429	1.379433576	0.269581633	0.19312489	0.004913609	0.820384473	0.263924602	0.797162138	-1.109851943	-1.186308686	-1.374519967	-0.559049103	-1.115508974	-0.582271438	-0.076456743	-0.264668024	0.55080284	-0.00565703	0.527580505	-0.188211281	0.627259583	0.070799713	0.604037248	0.815470864	0.259010994	0.792248529	-0.55645987	-0.023222335	0.533237535	0.763326	0.295347	1	1	0.741576	0.905032	1	0.924998	0.108299	0.967881	1	1	0.399969
P22599 [Alpha-1-antitrypsin 1-2 ...]	0.003783252	-0.107284263	1.179102818	-1.395052611	-0.907009585	-0.131129516	-1.595008612	0.075193587	-0.111067515	1.175319566	-1.398835863	-0.910792837	-0.134912768	-1.598791863	0.071410335	1.286387081	-1.287768348	-0.799725322	-0.023845253	-1.487724348	0.18247785	-2.574155429	-2.086112403	-1.310232334	-2.774111429	-1.103909231	0.488043026	1.263923095	-0.199956	1.470246198	0.775880069	-0.687999026	0.982203172	-1.463879095	0.206323103	1.670202198	0	0	0.0049	0	0	0	0	0	0.514702	5.00E-06	2.00E-06	2.90E-05	0.399969
P23530 [ ...]	-0.021018641	-0.645796846	2.920632985	1.88492037	-0.02758016	0.088174495	-0.012646028	0.100301014	-0.624778206	2.941651625	1.905939011	-0.006561519	0.109193135	0.008372613	0.121319655	3.566429831	2.530717217	0.618216686	0.733971341	0.633150819	0.746097861	-1.035712614	-2.948213145	-2.83245849	-2.933279012	-2.82033197	-1.91250053	-1.796745876	-1.897566398	-1.784619356	0.115754655	0.014934133	0.127881175	-0.100820522	0.01212652	0.112947042	1	0.705798	0.035358	0.156526	1	1	1	1	0.719489	0.029679	0.155507	1	0.999999
P23953;D3Z5G7;A0A1D5RM42;Q8VCT4;E9PYP1;Q8VCC2 [Carboxylesterase 1C ...]	0.649015177	1.067034463	1.313874336	-0.229932353	-1.668540853	0.971273374	-2.041898555	0.836690901	0.418019287	0.664859159	-0.87894753	-2.317556029	0.322258197	-2.690913732	0.187675724	0.246839872	-1.296966817	-2.735575316	-0.095761089	-3.108933018	-0.230343563	-1.543806689	-2.982415188	-0.342600962	-3.355772891	-0.477183435	-1.438608499	1.201205727	-1.811966202	1.066623254	2.639814227	-0.373357702	2.505231753	-3.013171929	-0.134582474	2.878589456	3.00E-06	3.20E-05	0.00175	0	0	8.30E-05	0	8.00E-06	0.013054	0.002671	0.000122	0	0.095521
P24270;A2AL20 [Catalase ...]	0	0.705583545	0	1.573504394	0	0.055555556	0	0.069444444	0.705583545	0	1.573504394	0	0.055555556	0	0.069444444	-0.705583545	0.86792085	-0.705583545	-0.650027989	-0.705583545	-0.6361391	1.573504394	0	0.055555556	0	0.069444444	-1.573504394	-1.517948839	-1.573504394	-1.50405995	0.055555556	0	0.069444444	-0.055555556	0.013888889	0.069444444	1	1	1	1	1	1	1	1	1	1	1	1	0.999999
P24369 [Peptidyl-prolyl cis-trans isomerase B ...]	-2.226791461	-0.579545242	-2.226791461	-2.226791461	-0.616062324	-2.171235906	2.226791461	-2.157347017	1.64724622	0	0	1.610729137	0.055555556	4.453582923	0.069444444	-1.64724622	-1.64724622	-0.036517082	-1.591690664	2.806336703	-1.577801775	0	1.610729137	0.055555556	4.453582923	0.069444444	1.610729137	0.055555556	4.453582923	0.069444444	-1.555173582	2.842853786	-1.541284693	4.398027367	0.013888889	-4.384138478	1	1	1	1	1	1	0	1	1	1	1	1	0.999999
P24472;A0A1L1SS61 [Glutathione S-transferase A4 ...]	-4.046006285	-6.345802791	-1.490217248	-1.535196424	1.031602191	-0.981655746	2.08265919	-0.225919055	-2.299796506	2.555789036	2.510809861	5.077608476	3.064350539	6.128665475	3.82008723	4.855585543	4.810606368	7.377404982	5.364147045	8.428461982	6.119883737	-0.044979175	2.521819439	0.508561502	3.572876439	1.264298194	2.566798614	0.553540677	3.617855614	1.309277369	-2.013257937	1.051057	-1.257521245	3.064314936	0.755736692	-2.308578245	1.10E-05	0	0.036603	0.046221	0	0.001678	0	1.60E-05	5.00E-06	2.00E-06	2.00E-06	0	1.00E-06
P24527 [Leukotriene A-4 hydrolase ...]	2.112490076	3.283234267	0.890592766	0.89232137	1.040228148	0.694601438	-0.14406778	0.698737043	1.170744191	-1.221897309	-1.220168706	-1.072261928	-1.417888638	-2.256557856	-1.413753033	-2.392641501	-2.390912897	-2.243006119	-2.588632829	-3.427302047	-2.584497224	0.001728603	0.149635381	-0.195991328	-1.034660547	-0.191855724	0.147906778	-0.197719932	-1.03638915	-0.193584327	-0.34562671	-1.184295928	-0.341491105	-0.838669218	0.004135605	0.842804823	0	0	1.80E-05	0.001288	1.80E-05	8.00E-05	0.005519	6.60E-05	4.00E-06	3.00E-06	0.000112	3.20E-05	1.00E-06
P25322 [G1/S-specific cyclin-D1 ...]	1.957476095	0	0	0	0	0.055555556	0	0.069444444	-1.957476095	-1.957476095	-1.957476095	-1.957476095	-1.901920539	-1.957476095	-1.88803165	0	0	0	0.055555556	0	0.069444444	0	0	0.055555556	0	0.069444444	0	0.055555556	0	0.069444444	0.055555556	0	0.069444444	-0.055555556	0.013888889	0.069444444	1	1	1	1	1	1	1	1	1	1	1	1	0.999999
P25444;D3YVC1;D3YWJ3 [40S ribosomal protein S2 ...]	-0.045591697	0.763799094	-0.009658017	-0.010141021	0.682501582	0.173018063	-0.021793276	0.172919665	0.80939079	0.035933679	0.035450675	0.728093279	0.21860976	0.02379842	0.218511362	-0.773457111	-0.773940115	-0.081297511	-0.59078103	-0.78559237	-0.590879428	-0.000483004	0.692159599	0.18267608	-0.012135259	0.182577682	0.692642603	0.183159085	-0.011652255	0.183060687	-0.509483519	-0.704294858	-0.509581917	-0.19481134	-9.84E-05	0.194712941	2.00E-06	0	0.001177	0.000808	0	0	7.50E-05	0	0	0.000355	0.000398	0	0
P26039;A2AIM2;E9PUM4;A0A1L1SQ51;Q8CDM9;Q71LX4;F6SX70;A0A1L1SRI1;F6S1V7;A0A1L1SQP9 [Talin-1 ...]	1.256564443	1.825506634	-0.126799934	2.183105424	0.450435708	0.694601438	-0.14406778	0.698737043	0.568942191	-1.383364377	0.926540981	-0.806128735	-0.561963005	-1.400632223	-0.5578274	-1.952306568	0.357598789	-1.375070926	-1.130905196	-1.969574414	-1.126769591	2.309905357	0.577235642	0.821401372	-0.017267846	0.825536977	-1.732669716	-1.488503986	-2.327173204	-1.484368381	0.24416573	-0.594503488	0.248301335	-0.838669218	0.004135605	0.842804823	0	0	0.002239	0	0.000763	1.00E-05	0.001086	8.00E-06	1.30E-05	0	1.00E-06	0	9.00E-06
P26040 [Ezrin ...]	0.606725759	3.543853746	-0.921960478	0.048498607	1.365624425	-0.525738079	1.076271737	-0.521602474	2.937127987	-1.528686237	-0.558227152	0.758898666	-1.132463838	0.469545977	-1.128328233	-4.465814224	-3.495355139	-2.178229321	-4.069591825	-2.46758201	-4.06545622	0.970459085	2.287584903	0.396222399	1.998232215	0.400358004	1.317125818	-0.574236686	1.027773129	-0.570101081	-1.891362504	-0.289352689	-1.887226899	1.602009816	0.004135605	-1.597874211	0.026459	2.80E-05	1	0.128287	0.003136	0.596165	0.014591	0.578032	0.000986	0.041517	0.537316	0.328596	0.132846
P26041;Q7TSG6 [Moesin ...]	1.957748248	4.764193263	0.96901478	0.521610031	-0.63460232	0.694601438	-0.14406778	0.698737043	2.806445015	-0.988733468	-1.436138217	-2.592350569	-1.26314681	-2.101816029	-1.259011206	-3.795178483	-4.242583232	-5.398795584	-4.069591825	-4.908261043	-4.06545622	-0.447404749	-1.6036171	-0.274413342	-1.11308256	-0.270277737	-1.156212351	0.172991407	-0.665677811	0.177127012	1.329203758	0.49053454	1.333339363	-0.838669218	0.004135605	0.842804823	0	0	0.000557	2.10E-05	0	1.00E-06	0.000127	1.00E-06	0	0.000115	0	0	0
P26262 [Plasma kallikrein;Plasma kallikrein heavy chain;Pl ...]	-0.771240162	-1.399892613	-1.435071744	-1.511528487	-1.699739768	-0.884268905	-1.440728775	-0.907491239	-0.628652451	-0.663831582	-0.740288325	-0.928499606	-0.113028743	-0.669488613	-0.136251077	-0.035179132	-0.111635875	-0.299847156	0.515623708	-0.040836162	0.492401373	-0.076456743	-0.264668024	0.55080284	-0.00565703	0.527580505	-0.188211281	0.627259583	0.070799713	0.604037248	0.815470864	0.259010994	0.792248529	-0.55645987	-0.023222335	0.533237535	0.005382	0.000927	0.001356	0.000862	0.000481	0.004734	0.000868	0.004008	0.420511	0.412766	0.33618	0.205685	0.999999
P26350;A0A087WP98;A0A087WPN6;A0A087WQN2 [Prothymosin alpha;Prothymosin alpha, N-terminally ...]	-0.045591697	0.834981116	1.956347677	-0.010141021	3.272374561	0.173018063	-0.021793276	0.172919665	0.880572812	2.001939374	0.035450675	3.317966258	0.21860976	0.02379842	0.218511362	1.121366561	-0.845122137	2.437393446	-0.661963052	-0.856774392	-0.66206145	-1.966488698	1.316026884	-1.783329614	-1.978140953	-1.783428012	3.282515583	0.183159085	-0.011652255	0.183060687	-3.099356498	-3.294167838	-3.099454896	-0.19481134	-9.84E-05	0.194712941	2.00E-06	0	0	0.000808	0	0	7.50E-05	0	0	0	0.000398	0	0
P26443 [Glutamate dehydrogenase 1, mitochondrial ...]	-0.503864619	-1.048205196	-0.809107685	0.479233527	-0.264876068	-0.355833073	0.688478138	-0.328573531	-0.544340577	-0.305243066	0.983098146	0.238988551	0.148031546	1.192342757	0.175291087	0.239097511	1.527438723	0.783329128	0.692372123	1.736683334	0.719631665	1.288341212	0.544231617	0.453274612	1.497585823	0.480534154	-0.744109595	-0.8350666	0.209244611	-0.807807058	-0.090957005	0.953354206	-0.063697463	1.044311211	0.027259542	-1.017051669	0.896635	0.516284	1	0.020795	0.431032	0.728353	0.007683	0.681277	0.253432	0.630925	0.039952	0.705552	0.976893
P26516 [26S proteasome non-ATPase regulatory subunit 7 ...]	-0.024573056	1.084487661	-0.003490218	-0.003823267	-0.023847091	0.140399124	-0.009147249	0.142063095	1.109060717	0.021082837	0.020749789	0.000725964	0.16497218	0.015425807	0.166636151	-1.08797788	-1.088310929	-1.108334753	-0.944088537	-1.09363491	-0.942424566	-0.000333049	-0.020356873	0.143889343	-0.00565703	0.145553314	-0.020023824	0.144222391	-0.005323982	0.145886362	0.164246216	0.014699843	0.165910187	-0.149546373	0.001663971	0.151210344	1	0.47169	1	1	1	1	1	1	0.454265	1	1	1	0.999999
P27005 [Protein S100-A8 ...]	3.64233923	9.228414139	-0.009658017	1.626794931	-0.051427252	0.173018063	-0.021793276	0.172919665	5.586074909	-3.651997247	-2.015544299	-3.693766482	-3.469321167	-3.664132506	-3.469419565	-9.238072157	-7.601619208	-9.279841391	-9.055396076	-9.250207416	-9.055494474	1.636452948	-0.041769234	0.18267608	-0.012135259	0.182577682	-1.678222183	-1.453776868	-1.648588207	-1.453875266	0.224445315	0.029633975	0.224346917	-0.19481134	-9.84E-05	0.194712941	0	0	0.001496	0	1.00E-06	0	0.000102	0	0	0	0	0	0
P27048;P63163;A0A0G2JGN4 [Small nuclear ribonucleoprotein-associated protein ...]	-0.045591697	1.072202863	-0.009658017	-0.010141021	-0.051427252	0.173018063	-0.021793276	0.172919665	1.117794559	0.035933679	0.035450675	-0.005835555	0.21860976	0.02379842	0.218511362	-1.08186088	-1.082343884	-1.123630114	-0.899184799	-1.093996139	-0.899283198	-0.000483004	-0.041769234	0.18267608	-0.012135259	0.182577682	-0.04128623	0.183159085	-0.011652255	0.183060687	0.224445315	0.029633975	0.224346917	-0.19481134	-9.84E-05	0.194712941	2.00E-06	0	0.001177	0.000808	1.00E-06	0	7.50E-05	0	0	0.000355	0.000398	0.503657	0
P27773;F6Q404 [Protein disulfide-isomerase A3 ...]	-0.735527935	-0.156197672	-1.406490379	-1.110127821	-1.608134176	-0.995950028	0.865539769	-0.991814423	0.579330263	-0.670962444	-0.374599886	-0.872606241	-0.260422093	1.601067704	-0.256286488	-1.250292708	-0.953930149	-1.451936504	-0.839752356	1.021737441	-0.835616751	0.296362558	-0.201643796	0.410540351	2.272030148	0.414675956	-0.498006355	0.114177793	1.97566759	0.118313398	0.612184148	2.473673945	0.616319753	1.861489797	0.004135605	-1.857354192	0.817898	0.01386	0.096248	0.637903	0.011581	0.889496	4.00E-05	0.902997	0.00398	0.00853	0.228463	0.000243	0.159439
P28293 [Cathepsin G ...]	1.353344406	1.904046182	0.731318955	0.976757262	-0.352684239	0.462786625	-0.093673245	0.43956429	0.550701776	-0.622025451	-0.376587144	-1.706028645	-0.890557781	-1.447017651	-0.913780116	-1.172727227	-0.92728892	-2.256730421	-1.441259557	-1.997719427	-1.464481892	0.245438308	-1.084003193	-0.26853233	-0.8249922	-0.291754664	-1.329441501	-0.513970637	-1.070430507	-0.537192972	0.815470864	0.259010994	0.792248529	-0.55645987	-0.023222335	0.533237535	0.155707	0.038002	0.610117	0.35434	0.741576	0.905032	1	0.924998	0.598145	0.58429	0.863054	0.054353	0.367644
P28650;J3QN31 [Adenylosuccinate synthetase isozyme 1 ...]	-0.021018641	1.171448596	-0.006167799	0.706348674	-0.02758016	0.088174495	-0.012646028	0.100301014	1.192467237	0.014850842	0.727367314	-0.006561519	0.109193135	0.008372613	0.121319655	-1.177616395	-0.465099922	-1.199028756	-1.083274101	-1.184094623	-1.071147581	0.712516472	-0.021412361	0.094342293	-0.006478229	0.106468813	-0.733928834	-0.618174179	-0.718994701	-0.606047659	0.115754655	0.014934133	0.127881175	-0.100820522	0.01212652	0.112947042	1	0.426621	1	0.789813	1	1	1	1	0.413179	1	0.75281	1	0.999999
P28665;P28666;A0A0N4SVU1;CON__ENSEMBL:ENSBTAP00000024146 [Murinoglobulin-1 ...]	1.532870318	1.759567806	2.569845042	-0.457383451	-1.888480055	2.450533152	-2.270839858	0.151755448	0.226697487	1.036974724	-1.990253769	-3.421350373	0.917662834	-3.803710176	-1.38111487	0.810277236	-2.216951257	-3.648047861	0.690965346	-4.030407663	-1.607812358	-3.027228493	-4.458325097	-0.11931189	-4.840684899	-2.418089594	-1.431096604	2.907916603	-1.813456406	0.609138899	4.339013207	-0.382359803	2.040235503	-4.72137301	-2.298777704	2.422595305	0.05362	0.172859	0.551359	3.40E-05	0	0.885028	0	0.002151	0.622845	0.01059	0.000375	2.00E-06	0.020249
P28867;Q1MX41;Q1MX43;Q1MX40;Q1MX42;F8WGT6;Q02111 [Protein kinase C delta type;Protein kinase C delta ...]	0.372339551	0.516813732	-0.006167799	-0.006317754	-0.02758016	0.088174495	-0.012646028	0.100301014	0.14447418	-0.37850735	-0.378657306	-0.399919711	-0.284165057	-0.384985579	-0.272038537	-0.52298153	-0.523131486	-0.544393892	-0.428639237	-0.529459759	-0.416512717	-0.000149955	-0.021412361	0.094342293	-0.006478229	0.106468813	-0.021262406	0.094492249	-0.006328273	0.106618769	0.115754655	0.014934133	0.127881175	-0.100820522	0.01212652	0.112947042	1	0.805166	1	1	1	1	1	1	1	0.994291	1	0.926171	0.999999
P29351 [Tyrosine-protein phosphatase non-receptor type 6 ...]	0.266230235	1.852177076	-0.126799934	0.080986221	-0.63460232	0.694601438	-0.14406778	0.698737043	1.585946841	-0.393030168	-0.185244014	-0.900832555	0.428371203	-0.410298015	0.432506808	-1.978977009	-1.771190855	-2.486779396	-1.157575638	-1.996244856	-1.153440033	0.207786155	-0.507802387	0.821401372	-0.017267846	0.825536977	-0.715588541	0.613615217	-0.225054001	0.617750822	1.329203758	0.49053454	1.333339363	-0.838669218	0.004135605	0.842804823	0.34414	0	0.002239	0.821409	1.00E-06	1.00E-05	0.001086	8.00E-06	0	0.003553	0.270406	8.00E-06	0.001999
P29595 [NEDD8 ...]	-0.045591697	0.896743197	-0.009658017	-0.010141021	-0.051427252	0.173018063	-0.021793276	0.172919665	0.942334894	0.035933679	0.035450675	-0.005835555	0.21860976	0.02379842	0.218511362	-0.906401215	-0.906884219	-0.948170449	-0.723725134	-0.918536474	-0.723823532	-0.000483004	-0.041769234	0.18267608	-0.012135259	0.182577682	-0.04128623	0.183159085	-0.011652255	0.183060687	0.224445315	0.029633975	0.224346917	-0.19481134	-9.84E-05	0.194712941	2.00E-06	0	0.001177	0.000808	1.00E-06	0	7.50E-05	0	0	0.000355	0.000398	0.503657	0
P29699;A0A338P703;A0A338P7G1;A0A338P7H5;A0A338P692;A0A338P6Y6;CON__P12763 [Alpha-2-HS-glycoprotein ...]	3.056471134	-1.971479535	2.296216859	0.662948913	0.053377787	0.049584102	-2.370419211	-1.527614388	-5.027950669	-0.760254275	-2.393522221	-3.003093347	-3.006887032	-5.426890345	-4.584085522	4.267696393	2.634428448	2.024857322	2.021063637	-0.398939676	0.443865147	-1.633267945	-2.242839072	-2.246632757	-4.666636069	-3.823831246	-0.609571126	-0.613364811	-3.033368124	-2.190563301	-0.003793685	-2.423796998	-1.580992175	-2.420003313	-1.57719849	0.842804823	0.008721	0	1	8.50E-05	1.00E-06	0.000134	0	0	0	0.000831	2.00E-06	0	9.00E-06
P29788 [Vitronectin ...]	-0.201829537	-2.187074861	0.725476295	-0.812334646	-0.694146856	0.053459878	-2.217122943	-1.37431812	-1.985245324	0.927305832	-0.610505109	-0.492317319	0.255289415	-2.015293407	-1.172488584	2.912551156	1.374740215	1.492928005	2.240534739	-0.030048083	0.81275674	-1.537810941	-1.419623151	-0.672016417	-2.942599239	-2.099794416	0.11818779	0.865794524	-1.404788297	-0.561983475	0.747606734	-1.522976087	-0.680171265	-2.270582822	-1.427777999	0.842804823	1.00E-05	0	0.000592	2.00E-06	2.00E-06	0.000966	0	0	4.50E-05	0.008608	0.072226	0.135203	0.795368
P30115;Q6P8Q0;P13745;A0A087WQI6;D3Z6A6;D3YZV3;P10648 [Glutathione S-transferase A3;Glutathione S-transfe ...]	-3.942261294	-5.909128725	-1.856099075	-2.199149252	0.045537382	-0.180076228	1.774376398	0.641523335	-1.96686743	2.086162219	1.743112042	3.987798676	3.762185067	5.716637693	4.583784629	4.05302965	3.709979473	5.954666107	5.729052497	7.683505123	6.55065206	-0.343050177	1.901636457	1.676022847	3.630475473	2.49762241	2.244686634	2.019073024	3.97352565	2.840672587	-0.22561361	1.728839016	0.595985953	1.954452626	0.821599563	-1.132853063	0	0	0.818541	0.00678	0	1.00E-05	0	0	6.00E-06	0	0	0	0
P30355;A0A0J9YV38;A0A0J9YUC8 [Arachidonate 5-lipoxygenase-activating protein ...]	1.319099679	2.168834093	-0.003490218	1.003835188	-0.023847091	0.140399124	-0.009147249	0.142063095	0.849734414	-1.322589897	-0.315264492	-1.342946771	-1.178700555	-1.328246928	-1.177036584	-2.172324311	-1.164998905	-2.192681184	-2.028434969	-2.177981342	-2.026770998	1.007325406	-0.020356873	0.143889343	-0.00565703	0.145553314	-1.027682279	-0.863436063	-1.012982436	-0.861772092	0.164246216	0.014699843	0.165910187	-0.149546373	0.001663971	0.151210344	0.38451	0.10308	1	0.602177	1	1	1	1	0.598145	0.374987	1	0.348259	0.453746
P30416 [Peptidyl-prolyl cis-trans isomerase FKBP4;Peptidyl ...]	-0.837161522	-1.459609074	-0.816078684	-0.816411733	0.924543065	-0.672189342	0.803441217	-0.670525371	-0.622447552	0.021082837	0.020749789	1.761704587	0.16497218	1.640602739	0.166636151	0.643530389	0.643197341	2.384152139	0.787419732	2.263050291	0.789083703	-0.000333049	1.740621749	0.143889343	1.619519901	0.145553314	1.740954798	0.144222391	1.61985295	0.145886362	-1.596732407	-0.121101848	-1.595068436	1.475630559	0.001663971	-1.473966588	1	0.705798	1	1	0.204504	1	0.228353	1	0.719489	1	1	0.201359	0.999999
P30681;A0A1B0GQX9 [High mobility group protein B2 ...]	3.187178951	4.698762922	-0.126799934	-0.292993685	-0.63460232	0.694601438	-0.14406778	0.698737043	1.511583971	-3.313978885	-3.480172636	-3.821781271	-2.492577513	-3.331246731	-2.488441908	-4.825562856	-4.991756607	-5.333365242	-4.004161484	-4.842830702	-4.000025879	-0.166193751	-0.507802387	0.821401372	-0.017267846	0.825536977	-0.341608635	0.987595123	0.148925905	0.991730728	1.329203758	0.49053454	1.333339363	-0.838669218	0.004135605	0.842804823	0	0	0.000374	7.00E-06	0	1.00E-06	0.000127	1.00E-06	1.00E-06	0	0	0	0
P31725 [Protein S100-A9 ...]	4.528310816	5.300809783	2.233233622	3.466822492	0.568374806	0.241102786	-0.835100403	0.854756077	0.772498967	-2.295077195	-1.061488325	-3.95993601	-4.28720803	-5.363411219	-3.673554739	-3.067576161	-1.833987291	-4.732434976	-5.059706997	-6.135910186	-4.446053706	1.23358887	-1.664858815	-1.992130835	-3.068334025	-1.378477545	-2.898447685	-3.225719705	-4.301922895	-2.612066415	-0.32727202	-1.40347521	0.286381271	-1.076203189	0.613653291	1.68985648	0	0	3.00E-06	0	0.090481	0.014737	0	1	0.000116	0	6.00E-05	0	0
P32020 [Non-specific lipid-transfer protein ...]	0.158464313	-0.872341924	-0.872341924	-0.872341924	1.60015001	-0.816786369	0.872341924	-0.80289748	-1.030806237	-1.030806237	-1.030806237	1.441685698	-0.975250681	0.713877612	-0.961361793	0	0	2.472491935	0.055555556	1.744683849	0.069444444	0	2.472491935	0.055555556	1.744683849	0.069444444	2.472491935	0.055555556	1.744683849	0.069444444	-2.416936379	-0.727808086	-2.40304749	1.689128293	0.013888889	-1.675239404	1.00E-06	1	1	1	0	0.034486	0	0.005818	1.00E-06	1.00E-06	1.00E-06	0	1.00E-06
P32261;A0A0A6YWH7;CON__P41361;A0A0A6YXS8;A0A0A6YX49;A0A0A6YX70 [Antithrombin-III ...]	0.104396826	-1.439432127	1.35547958	-0.809858035	-1.714184768	0.974318088	-0.963646358	0.974318088	-1.543828953	1.251082755	-0.914254861	-1.818581594	0.869921262	-1.068043184	0.869921262	2.794911708	0.629574092	-0.274752641	2.413750216	0.475785769	2.413750216	-2.165337616	-3.069664348	-0.381161492	-2.319125939	-0.381161492	-0.904326733	1.784176124	-0.153788323	1.784176124	2.688502856	0.75053841	2.688502856	-1.937964446	0	1.937964446	0.046535	0.000196	0.48519	0.000808	5.00E-05	1	0.000433	1	0.004598	0.009729	0.038118	0.000944	0.046055
P32848 [Parvalbumin alpha ...]	-0.045591697	-1.292817454	2.413566761	1.921310154	-0.051427252	0.173018063	-0.021793276	0.172919665	-1.247225758	2.459158457	1.96690185	-0.005835555	0.21860976	0.02379842	0.218511362	3.706384215	3.214127608	1.241390203	1.465835517	1.271024178	1.465737119	-0.492256607	-2.464994012	-2.240548697	-2.435360037	-2.240647095	-1.972737405	-1.748292091	-1.94310343	-1.748390489	0.224445315	0.029633975	0.224346917	-0.19481134	-9.84E-05	0.194712941	0	0	0	0	0	0	4.00E-06	0	0	0	0	0.297186	0
P33267;A0A0U1RPL9 [Cytochrome P450 2F2 ...]	0	1.313391716	0	0	0	0.055555556	0	0.069444444	1.313391716	0	0	0	0.055555556	0	0.069444444	-1.313391716	-1.313391716	-1.313391716	-1.25783616	-1.313391716	-1.243947271	0	0	0.055555556	0	0.069444444	0	0.055555556	0	0.069444444	0.055555556	0	0.069444444	-0.055555556	0.013888889	0.069444444	1	1	1	1	1	1	1	1	1	1	1	1	0.999999
P34928 [Apolipoprotein C-I;Truncated apolipoprotein C-I ...]	2.93142244	-0.25488971	-0.009658017	2.644800216	-0.051427252	0.173018063	-0.021793276	0.172919665	-3.186312149	-2.941080457	-0.286622224	-2.982849691	-2.758404377	-2.953215716	-2.758502775	0.245231692	2.899689925	0.203462458	0.427907773	0.233096433	0.427809375	2.654458233	-0.041769234	0.18267608	-0.012135259	0.182577682	-2.696227467	-2.471782152	-2.666593492	-2.47188055	0.224445315	0.029633975	0.224346917	-0.19481134	-9.84E-05	0.194712941	0	0.001032	0.004063	0	6.00E-06	0	0.000336	0	0	0	1.00E-06	0	0
P35282;A0A1W2P6Z4 [Ras-related protein Rab-21 ...]	-0.333024792	1.02694199	-0.084525996	1.482863806	0.926227476	0.377943056	-0.084525996	0.36694564	1.359966782	0.248498795	1.815888598	1.259252268	0.710967848	0.248498795	0.699970431	-1.111467986	0.455921816	-0.100714514	-0.648998934	-1.111467986	-0.65999635	1.567389802	1.010753473	0.462469053	0	0.451471636	-0.55663633	-1.10492075	-1.567389802	-1.115918167	-0.54828442	-1.010753473	-0.559281837	-0.462469053	-0.010997417	0.451471636	1	0.760324	1	0.665159	0.864828	1	1	1	0.608646	1	0.487768	0.660864	0.948245
P35564 [Calnexin ...]	-0.663382923	0.102488937	-0.126799934	0.165554445	-0.63460232	0.694601438	-0.14406778	0.698737043	0.76587186	0.536582989	0.828937368	0.028780603	1.357984361	0.519315143	1.362119966	-0.229288871	0.063065508	-0.737091257	0.592112501	-0.246556717	0.596248106	0.292354379	-0.507802387	0.821401372	-0.017267846	0.825536977	-0.800156765	0.529046993	-0.309622225	0.533182598	1.329203758	0.49053454	1.333339363	-0.838669218	0.004135605	0.842804823	0	0.702875	6.30E-05	0.789667	0	0	1.70E-05	0	1.00E-06	0	0	0.554981	0
P35979 [60S ribosomal protein L12 ...]	-1.395741325	-1.622082545	-1.153516157	-1.579412273	-0.620404837	-1.040819526	1.334236586	-1.051816943	-0.22634122	0.242225168	-0.183670947	0.775336488	0.354921799	2.729977912	0.343924383	0.468566388	0.042670272	1.001677708	0.581263019	2.956319131	0.570265602	-0.425896116	0.53311132	0.112696631	2.487752743	0.101699214	0.959007436	0.538592747	2.913648859	0.52759533	-0.420414689	1.954641423	-0.431412106	2.375056112	-0.010997417	-2.386053529	1	1	1	1	0.968362	1	0.298524	1	1	1	1	0.918778	0.999999
P39654 [Arachidonate 15-lipoxygenase ...]	-0.330358131	0.888043254	-0.042273937	-0.132343994	-0.305765173	0.372213937	-0.059541784	0.401235848	1.218401386	0.288084194	0.198014137	0.024592958	0.702572068	0.270816348	0.731593979	-0.930317192	-1.020387249	-1.193808427	-0.515829317	-0.947585038	-0.486807407	-0.090070057	-0.263491236	0.414487875	-0.017267846	0.443509785	-0.173421179	0.504557932	0.072802211	0.533579842	0.67797911	0.246223389	0.707001021	-0.431755721	0.029021911	0.460777631	1	0.810594	1	1	1	1	1	1	0.67901	1	1	1	0.955981
P40124;B1ARS0;D3YTR7;A0A286YCS6;Q9CYT6 [Adenylyl cyclase-associated protein 1 ...]	0.56321397	2.099584066	0.586967464	0.883353585	1.532274127	1.92206816	0.820486459	1.03175	1.536370096	0.023753493	0.320139615	0.969060157	1.35885419	0.257272489	0.46853603	-1.512616603	-1.216230481	-0.567309939	-0.177515906	-1.279097607	-1.067834066	0.296386122	0.945306663	1.335100697	0.233518995	0.444782536	0.648920542	1.038714575	-0.062867126	0.148396415	0.389794033	-0.711787668	-0.500524127	-1.101581701	-0.89031816	0.211263541	0.035888	0.000252	0.030741	0.009999	0.001251	0.000525	0.010928	0.019648	0.021391	1	0.790339	0.139278	0.040796
P40142;A0A286YE28;E0CY51 [Transketolase ...]	1.341157684	3.014643734	-0.12187983	0.902897263	-0.165947235	-2.804093892	1.167335509	-1.366798424	1.67348605	-1.463037515	-0.438260422	-1.50710492	-4.145251577	-0.173822175	-2.707956108	-3.136523565	-2.111746472	-3.180590969	-5.818737627	-1.847308225	-4.381442158	1.024777093	-0.044067405	-2.682214062	1.28921534	-1.244918594	-1.068844498	-3.706991155	0.264438246	-2.269695687	-2.638146657	1.333282744	-1.200851189	3.971429401	1.437295468	-2.534133933	0	0	2.70E-05	0	7.00E-06	0	0	0.685178	0	1.00E-06	0.002608	0	0
P41105 [60S ribosomal protein L28 ...]	-0.776584991	-0.776584991	-0.776584991	-0.776584991	2.581831127	-0.721029435	0.776584991	-0.707140547	0	0	0	3.358416118	0.055555556	1.553169982	0.069444444	0	0	3.358416118	0.055555556	1.553169982	0.069444444	0	3.358416118	0.055555556	1.553169982	0.069444444	3.358416118	0.055555556	1.553169982	0.069444444	-3.302860562	-1.805246136	-3.288971673	1.497614426	0.013888889	-1.483725538	1	1	1	1	1	1	1	1	1	1	1	1	0.999999
P41245 [Matrix metalloproteinase-9 ...]	0.601476637	1.198397886	-0.126799934	0.038117873	-0.63460232	0.694601438	-0.14406778	0.698737043	0.596921249	-0.72827657	-0.563358764	-1.236078957	0.093124802	-0.745544417	0.097260406	-1.325197819	-1.160280013	-1.833000206	-0.503796448	-1.342465666	-0.499660843	0.164917807	-0.507802387	0.821401372	-0.017267846	0.825536977	-0.672720193	0.656483565	-0.182185653	0.66061917	1.329203758	0.49053454	1.333339363	-0.838669218	0.004135605	0.842804823	4.60E-05	0	0.002239	0.433493	1.00E-06	1.00E-05	0.001086	8.00E-06	1.30E-05	1.00E-06	0.000335	0	0.23939
P42932;H3BL49;H3BJB6;H3BKR8;H3BLL1;H3BKG2 [T-complex protein 1 subunit theta ...]	-0.785872689	-0.207046634	0.589741232	0.537875977	1.669528396	0.374382956	0.176150701	0.378518561	0.578826054	1.37561392	1.323748665	2.455401085	1.160255645	0.96202339	1.16439125	0.796787866	0.744922611	1.876575031	0.581429591	0.383197336	0.585565196	-0.051865255	1.079787165	-0.215358275	-0.41359053	-0.21122267	1.13165242	-0.16349302	-0.361725275	-0.159357415	-1.29514544	-1.493377695	-1.291009835	-0.198232255	0.004135605	0.20236786	0.000912	0.961811	0.000185	0.000383	0	0.001012	0.117856	0.000878	0.001254	2.00E-06	8.00E-06	0	7.00E-06
P43274 [Histone H1.4 ...]	3.124702391	4.291667206	1.53677771	3.35192828	1.734420412	0.066035318	0.093708139	-0.172029012	1.166964815	-1.587924681	0.227225889	-1.390281979	-3.058667073	-3.030994252	-3.296731403	-2.754889496	-0.939738926	-2.557246794	-4.225631888	-4.197959067	-4.463696218	1.815150569	0.197642702	-1.470742392	-1.443069571	-1.708806723	-1.617507868	-3.285892962	-3.25822014	-3.523957292	-1.668385094	-1.640712273	-1.906449424	0.027672821	-0.23806433	-0.265737152	0	0	5.30E-05	0	4.00E-06	0.668901	0.450148	0.970733	0.000128	2.30E-05	0.33618	3.40E-05	0
P43275 [Histone H1.1 ...]	4.5577783	5.885901905	2.164440033	3.708891919	2.42853099	-0.629010411	-0.348443835	-0.624874806	1.328123605	-2.393338267	-0.848886381	-2.12924731	-5.18678871	-4.906222135	-5.182653105	-3.721461872	-2.177009986	-3.457370915	-6.514912316	-6.23434574	-6.510776711	1.544451886	0.264090957	-2.793450443	-2.512883868	-2.789314839	-1.280360929	-4.33790233	-4.057335754	-4.333766725	-3.0575414	-2.776974825	-3.053405795	0.280566576	0.004135605	-0.276430971	0	0	1.00E-05	0	1.00E-06	0.000505	0.01574	0.000447	0	0	0	0	0
P43276 [Histone H1.5 ...]	2.040612355	5.263107689	1.973985643	4.170901201	2.224416634	-0.489543746	-0.352327638	-0.485408141	3.222495335	-0.066626711	2.130288847	0.183804279	-2.530156101	-2.392939992	-2.526020496	-3.289122046	-1.092206488	-3.038691055	-5.752651436	-5.615435327	-5.748515831	2.196915558	0.250430991	-2.463529389	-2.326313281	-2.459393785	-1.946484567	-4.660444947	-4.523228839	-4.656309343	-2.71396038	-2.576744272	-2.709824775	0.137216109	0.004135605	-0.133080504	0	0	0	0	0	0	0	0	0	0.218842	0	0.00231	0
P45376;D3YVJ7 [Aldose reductase ...]	-3.479152439	-5.139340313	-1.580473284	-2.274393259	1.85648403	-1.819182867	1.697266075	-1.162140734	-1.660187874	1.898679155	1.20475918	5.335636469	1.659969572	5.176418514	2.317011705	3.55886703	2.864947055	6.995824343	3.320157446	6.836606388	3.97719958	-0.693919975	3.436957313	-0.238709584	3.277739358	0.41833255	4.130877288	0.455210391	3.971659333	1.112252525	-3.675666897	-0.159217955	-3.018624764	3.516448942	0.657042134	-2.859406808	0	0	0.201678	1.30E-05	0	0.137317	0	1.90E-05	0	0	0	0	0
P45377;P21300 [Aldose reductase-related protein 2;Aldose reductas ...]	-3.369427021	-4.850228921	-1.626331295	-1.773618673	1.432873589	-2.01144266	0.994309099	1.175469251	-1.4808019	1.743095726	1.595808348	4.80230061	1.357984361	4.36373612	4.544896272	3.223897626	3.076610248	6.283102509	2.838786261	5.84453802	6.025698172	-0.147287378	3.059204884	-0.385111365	2.620640394	2.801800546	3.206492262	-0.237823987	2.767927772	2.949087924	-3.444316249	-0.43856449	-0.257404337	3.005751759	3.186911911	0.181160152	0	0	0.044238	0.000248	0	3.10E-05	1.30E-05	0	0	5.60E-05	0	0	0
P46412;A0A1C7ZMZ5;A0A1C7ZMZ7 [Glutathione peroxidase 3 ...]	3.042105843	0	0	0	0	0.055555556	0	0.069444444	-3.042105843	-3.042105843	-3.042105843	-3.042105843	-2.986550287	-3.042105843	-2.972661398	0	0	0	0.055555556	0	0.069444444	0	0	0.055555556	0	0.069444444	0	0.055555556	0	0.069444444	0.055555556	0	0.069444444	-0.055555556	0.013888889	0.069444444	1	1	1	1	1	1	1	1	1	1	1	1	0.999999
P46467;Q8VEJ9;Q8BPY9 [Vacuolar protein sorting-associated protein 4B;Vac ...]	0	1.275427511	0	0	0	0.055555556	0	0.069444444	1.275427511	0	0	0	0.055555556	0	0.069444444	-1.275427511	-1.275427511	-1.275427511	-1.219871956	-1.275427511	-1.205983067	0	0	0.055555556	0	0.069444444	0	0.055555556	0	0.069444444	0.055555556	0	0.069444444	-0.055555556	0.013888889	0.069444444	1	1	1	1	1	1	1	1	1	1	1	1	0.999999
P47739;B1ATI6 [Aldehyde dehydrogenase, dimeric NADP-preferring ...]	-2.278066754	-3.627459263	-2.008485122	-2.084941865	0.272298661	-1.457682282	1.826795662	-1.480904617	-1.349392509	0.269581633	0.19312489	2.550365415	0.820384473	4.104862416	0.797162138	1.618974142	1.542517399	3.899757924	2.169776981	5.454254925	2.146554647	-0.076456743	2.280783782	0.55080284	3.835280783	0.527580505	2.357240525	0.627259583	3.911737526	0.604037248	-1.729980942	1.554497001	-1.753203277	3.284477944	-0.023222335	-3.307700278	0.889327	0.115833	1	1	0.070204	0.986025	0.004213	1	0.261325	1	1	0.032749	0.58104
P47791 [Glutathione reductase, mitochondrial ...]	2.041256392	2.803637089	-0.126799934	1.66504964	0.319469772	0.694601438	-0.14406778	0.698737043	0.762380697	-2.168056326	-0.376206752	-1.72178662	-1.346654954	-2.185324172	-1.342519349	-2.930437022	-1.138587449	-2.484167317	-2.109035651	-2.947704869	-2.104900046	1.791849574	0.446269706	0.821401372	-0.017267846	0.825536977	-1.345579868	-0.970448202	-1.80911742	-0.966312597	0.375131666	-0.463537552	0.379267271	-0.838669218	0.004135605	0.842804823	0	0	0.025029	6.00E-06	0.331243	0.000291	0.014378	0.000245	1.00E-04	0	0.070684	2.00E-06	1.00E-06
P47911;A0A0J9YU32 [60S ribosomal protein L6 ...]	-1.91964549	-0.967599643	-1.472388706	-1.501742877	0.407747064	-1.352868884	1.903402542	-1.34873328	0.952045847	0.447256784	0.417902614	2.327392554	0.566776606	3.823048033	0.570912211	-0.504789063	-0.534143234	1.375346707	-0.385269241	2.871002186	-0.381133637	-0.029354171	1.88013577	0.119519822	3.375791249	0.123655427	1.909489941	0.148873992	3.405145419	0.153009597	-1.760615948	1.495655479	-1.756480343	3.256271427	0.004135605	-3.252135822	1	0	0.0096	0.023235	0	4.00E-06	0	3.00E-06	0	0.007074	0.020487	0	3.00E-06
P47962;D3YYV8 [60S ribosomal protein L5 ...]	-0.976548484	-1.160893721	-0.673613448	-0.763833461	-0.046058708	-0.220338836	0.552983901	-0.193079294	-0.184345237	0.302935036	0.212715024	0.930489776	0.756209648	1.529532385	0.78346919	0.487280273	0.39706026	1.114835012	0.940554885	1.713877621	0.967814426	-0.090220012	0.62755474	0.453274612	1.226597349	0.480534154	0.717774752	0.543494625	1.316817361	0.570754166	-0.174280128	0.599042609	-0.147020586	0.773322737	0.027259542	-0.746063195	0.822881	0.58827	1	1	0.741576	0.959886	0.238114	0.924998	0.973745	0.967881	1	0.383455	0.505032
P47963 [60S ribosomal protein L13 ...]	0	1.763986665	0	0	0	0.055555556	0	0.069444444	1.763986665	0	0	0	0.055555556	0	0.069444444	-1.763986665	-1.763986665	-1.763986665	-1.70843111	-1.763986665	-1.694542221	0	0	0.055555556	0	0.069444444	0	0.055555556	0	0.069444444	0.055555556	0	0.069444444	-0.055555556	0.013888889	0.069444444	1	1	1	1	1	1	1	1	1	1	1	1	0.999999
P48036;A0A0G2JGQ0 [Annexin A5 ...]	-0.509644734	0.488720483	-1.54774564	-0.526440751	-0.728520183	-0.726344269	-0.757400567	0.354295517	0.998365217	-1.038100907	-0.016796018	-0.21887545	-0.216699535	-0.247755833	0.863940251	-2.036466123	-1.015161234	-1.217240667	-1.215064752	-1.24612105	-0.134424966	1.021304889	0.819225457	0.821401372	0.790345074	1.902041157	-0.202079432	-0.199903517	-0.230959815	0.880736268	0.002175915	-0.028880383	1.0828157	-0.031056298	1.080639786	1.111696084	0.001996	0.497247	6.20E-05	0.001851	0.000612	0.000698	0.002386	0.524146	0.008257	0.007074	1	0.616175	0.658531
P48678;D3YUF7 [Prelamin-A/C;Lamin-A/C ...]	-2.268872949	-3.251381543	-1.732289959	-1.89848371	-0.857042943	-0.910888588	1.461422245	-0.906752983	-0.982508595	0.536582989	0.370389238	1.411830006	1.357984361	3.730295194	1.362119966	1.519091584	1.352897833	2.3943386	2.340492956	4.712803789	2.34462856	-0.166193751	0.875247016	0.821401372	3.193712205	0.825536977	1.041440767	0.987595123	3.359905956	0.991730728	-0.053845645	2.318465188	-0.04971004	2.372310833	0.004135605	-2.368175228	1.00E-06	0	0.002239	6.90E-05	1.30E-05	1.00E-05	0	8.00E-06	2.30E-05	1.50E-05	0.00026	0	0
P48999;E9QA93;E9Q6H6;A0A0N4SW45 [Arachidonate 5-lipoxygenase ...]	-0.284760962	0.079542754	-0.126799934	-0.047817998	-0.63460232	0.694601438	-0.14406778	0.698737043	0.364303716	0.157961028	0.236942964	-0.349841358	0.9793624	0.140693182	0.983498005	-0.206342688	-0.127360752	-0.714145074	0.615058684	-0.223610534	0.619194289	0.078981935	-0.507802387	0.821401372	-0.017267846	0.825536977	-0.586784322	0.742419436	-0.096249782	0.746555041	1.329203758	0.49053454	1.333339363	-0.838669218	0.004135605	0.842804823	0.000148	0.426621	0.002239	0.067337	1.00E-06	1.00E-05	0.001086	8.00E-06	0.000459	0.056451	0.035851	0.000602	0
P49182 [Heparin cofactor 2 ...]	1.133330031	-1.44231798	-0.400376843	-0.4904469	-0.663868079	0.014111031	-0.41764469	0.043132942	-2.575648011	-1.533706874	-1.623776931	-1.79719811	-1.119219	-1.550974721	-1.090197089	1.041941137	0.95187108	0.778449901	1.456429011	1.02467329	1.485450922	-0.090070057	-0.263491236	0.414487875	-0.017267846	0.443509785	-0.173421179	0.504557932	0.072802211	0.533579842	0.67797911	0.246223389	0.707001021	-0.431755721	0.029021911	0.460777631	0.96786	0.452168	1	0.913663	0.768481	1	0.895083	1	0.267629	0.60772	0.570499	0.488784	0.772719
P49290 [Eosinophil peroxidase;Eosinophil peroxidase light ...]	2.20668665	3.346875708	-0.126799934	-0.292993685	-0.63460232	0.694601438	-0.14406778	0.698737043	1.140189058	-2.333486584	-2.499680335	-2.84128897	-1.512085212	-2.35075443	-1.507949607	-3.473675641	-3.639869392	-3.981478028	-2.65227427	-3.490943488	-2.648138665	-0.166193751	-0.507802387	0.821401372	-0.017267846	0.825536977	-0.341608635	0.987595123	0.148925905	0.991730728	1.329203758	0.49053454	1.333339363	-0.838669218	0.004135605	0.842804823	0	0	0.000164	2.00E-06	0	1.00E-06	5.00E-05	0	0	0	0	0	0
P49710;E9Q4E5 [Hematopoietic lineage cell-specific protein ...]	-0.082287841	0.754310816	-0.126799934	-0.292993685	-0.63460232	0.694601438	-0.14406778	0.698737043	0.836598656	-0.044512093	-0.210705844	-0.55231448	0.776889279	-0.06177994	0.781024883	-0.88111075	-1.047304501	-1.388913136	-0.059709378	-0.898378596	-0.055573773	-0.166193751	-0.507802387	0.821401372	-0.017267846	0.825536977	-0.341608635	0.987595123	0.148925905	0.991730728	1.329203758	0.49053454	1.333339363	-0.838669218	0.004135605	0.842804823	0.000307	0	0.000164	2.00E-06	0	1.00E-06	5.00E-05	0	0	0.409983	0.000558	0	0
P50247;A2ALT5 [Adenosylhomocysteinase ...]	-1.736937651	-1.032864334	-0.453038582	-0.869680728	-0.678365284	-0.607693407	-0.001142446	-0.603557802	0.704073316	1.283899069	0.867256922	1.058572366	1.129244244	1.735795204	1.133379849	0.579825752	0.163183606	0.35449905	0.425170927	1.031721888	0.429306532	-0.416642146	-0.225326702	-0.154654825	0.451896136	-0.15051922	0.191315444	0.261987321	0.868538282	0.266122926	0.070671877	0.677222838	0.074807482	0.606550961	0.004135605	-0.602415356	1.00E-06	1.60E-05	0.007604	8.50E-05	0.000436	0.00105	1	0.001014	0.000737	1.00E-05	0.000205	3.60E-05	2.20E-05
P50396;D6RI86 [Rab GDP dissociation inhibitor alpha ...]	0.4817615	0.14706574	-0.477086013	0.582221614	1.569217738	0.073716827	0.295396553	0.050494492	-0.33469576	-0.958847513	0.100460114	1.087456238	-0.408044673	-0.186364946	-0.431267008	-0.624151753	0.435155874	1.422151998	-0.073348913	0.148330813	-0.096571248	1.059307627	2.046303751	0.55080284	0.772482566	0.527580505	0.986996124	-0.508504787	-0.28682506	-0.531727122	-1.495500911	-1.273821185	-1.518723246	0.221679726	-0.023222335	-0.244902061	0.641222	0.802294	1	0.551497	0.108406	0.986025	0.741576	1	0.877265	0.489267	1	0.388244	0.920376
P50516;D3Z1B9;D3YWH3;D3YZ23 [V-type proton ATPase catalytic subunit A ...]	-0.224397303	0.802554319	-0.126799934	-0.292993685	-0.63460232	0.694601438	-0.14406778	0.698737043	1.026951623	0.09759737	-0.068596382	-0.410205017	0.918998741	0.080329523	0.923134346	-0.929354253	-1.095548004	-1.43715664	-0.107952881	-0.946622099	-0.103817277	-0.166193751	-0.507802387	0.821401372	-0.017267846	0.825536977	-0.341608635	0.987595123	0.148925905	0.991730728	1.329203758	0.49053454	1.333339363	-0.838669218	0.004135605	0.842804823	7.00E-06	0	0.000164	2.00E-06	0	1.00E-06	5.00E-05	0	0	0.045244	0.160892	3.00E-06	0
P50543 [Protein S100-A11 ...]	-0.729464237	-0.690687411	-1.487063007	-1.487212962	-1.508475368	-1.392720714	1.468249181	-1.380594194	0.038776825	-0.75759877	-0.757748726	-0.779011132	-0.663256477	2.197713417	-0.651129957	-0.796375596	-0.796525551	-0.817787957	-0.702033302	2.158936592	-0.689906782	-0.000149955	-0.021412361	0.094342293	2.955312188	0.106468813	-0.021262406	0.094492249	2.955462143	0.106618769	0.115754655	2.976724549	0.127881175	2.860969894	0.01212652	-2.848843374	0.763326	0.655855	1	1	1	1	0.056016	1	1	0.741388	0.745892	0.666564	0.792342
P50580 [Proliferation-associated protein 2G4 ...]	-0.024573056	0.415100574	-0.003490218	-0.003823267	0.51418987	0.140399124	-0.009147249	0.142063095	0.43967363	0.021082837	0.020749789	0.538762926	0.16497218	0.015425807	0.166636151	-0.418590793	-0.418923842	0.099089296	-0.27470145	-0.424247823	-0.273037479	-0.000333049	0.517680088	0.143889343	-0.00565703	0.145553314	0.518013137	0.144222391	-0.005323982	0.145886362	-0.373790746	-0.523337119	-0.372126775	-0.149546373	0.001663971	0.151210344	1	0.878643	1	1	0.87018	1	1	1	0.844761	1	1	0.825414	0.999999
P51150;A0A0N4SVR6;A0A0N4SVG9 [Ras-related protein Rab-7a ...]	1.184055891	1.684218388	-0.126799934	0.199056899	0.162706424	0.694601438	-0.14406778	0.698737043	0.500162498	-1.310855824	-0.984998992	-1.021349467	-0.489454453	-1.328123671	-0.485318848	-1.811018322	-1.485161489	-1.521511964	-0.98961695	-1.828286169	-0.985481346	0.325856833	0.289506358	0.821401372	-0.017267846	0.825536977	-0.036350475	0.495544539	-0.343124679	0.499680144	0.531895014	-0.306774204	0.536030619	-0.838669218	0.004135605	0.842804823	0	0	0.002239	0.947343	1	1.00E-05	0.001086	8.00E-06	2.20E-05	0	2.80E-05	0	2.60E-05
P51437 [Cathelin-related antimicrobial peptide ...]	4.322269055	4.337834939	1.826685334	5.253247627	2.843819761	0.055555556	0	0.069444444	0.015565885	-2.495583721	0.930978572	-1.478449293	-4.266713499	-4.322269055	-4.25282461	-2.511149606	0.915412688	-1.494015178	-4.282279384	-4.337834939	-4.268390495	3.426562293	1.017134428	-1.771129778	-1.826685334	-1.757240889	-2.409427866	-5.197692072	-5.253247627	-5.183803183	-2.788264206	-2.843819761	-2.774375317	-0.055555556	0.013888889	0.069444444	0	0	0.000156	0	0	0.829669	1	0.683267	1	7.00E-06	0.008946	0	0
P51881;P48962;Q3V132 [ADP/ATP translocase 2;ADP/ATP translocase 2, N-ter ...]	-1.040558159	-0.488213177	-1.527995736	-2.031384878	-0.382975282	-1.823352149	1.552692149	-1.819216544	0.552344981	-0.487437577	-0.99082672	0.657582876	-0.78279399	2.593250308	-0.778658385	-1.039782558	-1.543171701	0.105237895	-1.335138971	2.040905326	-1.331003367	-0.503389143	1.145020453	-0.295356413	3.080687885	-0.291220808	1.648409596	0.208032729	3.584077027	0.212168334	-1.440376866	1.935667431	-1.436241262	3.376044298	0.004135605	-3.371908693	0.078204	0.001495	1	0.110427	0.000833	0.433902	0	0.440642	0.004834	0.010362	0.000195	0.001598	0.000501
P51885;CON__Q05443 [Lumican ...]	-0.598682596	-2.008589678	0.612898904	-1.403649928	-1.444936158	-1.220490843	-1.415302183	-1.220589241	-1.409907081	1.2115815	-0.804967332	-0.846253562	-0.621808247	-0.816619587	-0.621906645	2.621488581	0.60493975	0.563653519	0.788098834	0.593287495	0.788000436	-2.016548832	-2.057835062	-1.833389747	-2.028201087	-1.833488145	-0.04128623	0.183159085	-0.011652255	0.183060687	0.224445315	0.029633975	0.224346917	-0.19481134	-9.84E-05	0.194712941	0	0	0	0	0	0	0	0	0	0	0	0	1.00E-06
P52480;A0A1L1SU37;A0A1L1SQV8;A0A1L1SUV0;A0A1L1SSN6;A0A1L1STV8;A0A1L1ST52;A0A1L1SVH2;E9Q509;G3X925;P53657 [Pyruvate kinase PKM ...]	0.021082923	2.094178113	-0.352162757	-0.099063927	1.864693457	-0.620546205	1.134609207	0.085677253	2.07309519	-0.37324568	-0.12014685	1.843610534	-0.641629128	1.113526284	0.06459433	-2.446340869	-2.19324204	-0.229484656	-2.714724317	-0.959568906	-2.008500859	0.25309883	2.216856214	-0.268383448	1.486771964	0.43784001	1.963757384	-0.521482278	1.233673134	0.18474118	-2.485239661	-0.73008425	-1.779016204	1.755155411	0.706223458	-1.048931954	0.02788	2.70E-05	0.137271	0.046293	5.30E-05	0.383146	0.000419	0.021586	0.000634	0.53343	1	0.001395	0.207334
P53810;F8WGG5;J3QQ30;J3QPW1 [Phosphatidylinositol transfer protein alpha isofor ...]	0	1.288596589	0	0	0	0.055555556	0	0.069444444	1.288596589	0	0	0	0.055555556	0	0.069444444	-1.288596589	-1.288596589	-1.288596589	-1.233041033	-1.288596589	-1.219152145	0	0	0.055555556	0	0.069444444	0	0.055555556	0	0.069444444	0.055555556	0	0.069444444	-0.055555556	0.013888889	0.069444444	1	1	1	1	1	1	1	1	1	1	1	1	0.999999
P53994;G3UXQ7;G3V022 [Ras-related protein Rab-2A ...]	-0.021018641	1.120310241	-0.006167799	-0.006317754	-0.02758016	0.088174495	-0.012646028	0.100301014	1.141328882	0.014850842	0.014700887	-0.006561519	0.109193135	0.008372613	0.121319655	-1.12647804	-1.126627995	-1.147890401	-1.032135746	-1.132956268	-1.020009226	-0.000149955	-0.021412361	0.094342293	-0.006478229	0.106468813	-0.021262406	0.094492249	-0.006328273	0.106618769	0.115754655	0.014934133	0.127881175	-0.100820522	0.01212652	0.112947042	1	0.452168	1	1	1	1	1	1	0.435404	1	1	1	0.999999
P56480;Q831A5 [ATP synthase subunit beta, mitochondrial ...]	-1.56800345	-1.541143234	-3.730399485	-3.896593236	-1.989469699	-2.908998113	1.158491614	-2.904862509	0.026860217	-2.162396035	-2.328589786	-0.421466249	-1.340994663	2.726495064	-1.336859058	-2.189256251	-2.355450002	-0.448326466	-1.36785488	2.699634848	-1.363719275	-0.166193751	1.740929786	0.821401372	4.888891099	0.825536977	1.907123537	0.987595123	5.05508485	0.991730728	-0.919528414	3.147961313	-0.915392809	4.067489727	0.004135605	-4.063354122	0.000114	0.000141	0	0	4.00E-06	0	0	0	0.817801	0	0	0.00075	0
P57096 [Prostate stem cell antigen ...]	-0.470783621	-1.566441671	-2.237194544	-4.205804112	0.670975502	-4.150248557	-0.962262865	-4.136359668	-1.09565805	-1.766410923	-3.735020491	1.141759123	-3.679464936	-0.491479244	-3.665576047	-0.670752873	-2.639362441	2.237417173	-2.583806886	0.604178806	-2.569917997	-1.968609568	2.908170046	-1.913054013	1.274931679	-1.899165124	4.876779614	0.055555556	3.243541247	0.069444444	-4.821224059	-1.633238367	-4.80733517	3.187985692	0.013888889	-3.174096803	0	0	3.00E-06	0	0.010372	0	0.00032	0	3.00E-06	0.000162	0	2.00E-06	0
P58252;G3UXK8;G3UZ34;A2AH85;O08810 [Elongation factor 2 ...]	-2.477537115	-1.556511607	-1.049171801	-1.472770219	0.152596483	-2.412418409	0.879818247	0.150555122	0.921025508	1.428365314	1.004766895	2.630133598	0.065118706	3.357355361	2.628092237	0.507339806	0.083741387	1.70910809	-0.855906802	2.436329853	1.707066729	-0.423598419	1.201768284	-1.363246608	1.928990047	1.199726923	1.625366702	-0.93964819	2.352588466	1.623325342	-2.565014892	0.727221764	-0.00204136	3.292236656	2.562973532	-0.729263124	0	0.000331	0.253638	0.007208	8.00E-06	0.000106	0	8.00E-06	3.90E-05	1.00E-06	0.00026	0	0.999999
P59999;Q3TX55;E9PWA7 [Actin-related protein 2/3 complex subunit 4 ...]	1.608233439	1.598057425	-0.864382427	-0.186342776	-1.372184814	-0.042981055	0.593514713	-0.03884545	-0.010176014	-2.472615866	-1.794576215	-2.980418252	-1.651214494	-1.014718725	-1.647078889	-2.462439852	-1.784400201	-2.970242238	-1.64103848	-1.004542712	-1.636902875	0.678039651	-0.507802387	0.821401372	1.45789714	0.825536977	-1.185842037	0.143361721	0.77985749	0.147497326	1.329203758	1.965699527	1.333339363	0.636495769	0.004135605	-0.632360164	2.00E-06	3.00E-06	0.036991	0.091475	3.30E-05	0.000525	1.00E-06	0.000447	1	1.00E-06	9.60E-05	0	1.80E-05
P60335 [Poly(rC)-binding protein 1 ...]	-1.175942484	-0.564870648	0.887109126	0.412021552	1.030487593	-0.957332724	1.108557511	-0.957431122	0.611071836	2.06305161	1.587964036	2.206430077	0.21860976	2.284499995	0.218511362	1.451979775	0.9768922	1.595358241	-0.392462076	1.673428159	-0.392560474	-0.475087574	0.143378467	-1.844441851	0.221448385	-1.844540249	0.618466041	-1.369354276	0.696535959	-1.369452675	-1.987820318	0.078069918	-1.987918716	2.065890236	-9.84E-05	-2.065988634	0	0	0	0	0	0	0	0	0	0	0	0	0
P60766 [Cell division control protein 42 homolog ...]	1.031021356	0.242909727	1.385420327	2.092169421	0.605938788	-0.857905499	-0.18622246	-0.858003897	-0.788111629	0.354398971	1.061148065	-0.425082568	-1.888926854	-1.217243815	-1.889025252	1.1425106	1.849259694	0.363029061	-1.100815225	-0.429132186	-1.100913623	0.706749094	-0.779481539	-2.243325826	-1.571642787	-2.243424224	-1.486230633	-2.95007492	-2.278391881	-2.950173318	-1.463844287	-0.792161248	-1.463942685	0.671683039	-9.84E-05	-0.671781437	0.025946	1	0.004345	0.000178	0.26593	0.008801	0.437849	0.008304	0.001033	0.076617	0.000182	0.036461	1.00E-06
P60843;Q8BTU6;P10630;E9Q561;A0A338P6X5 [Eukaryotic initiation factor 4A-I ...]	-2.1783086	-2.129019113	-1.746546309	-1.408748142	-0.651620218	-1.033580665	0.89482799	-1.971684844	0.049289487	0.431762292	0.769560458	1.526688382	1.144727935	3.07313659	0.206623756	0.382472804	0.720270971	1.477398895	1.095438448	3.023847103	0.157334269	0.337798167	1.09492609	0.712965643	2.641374299	-0.225138535	0.757127924	0.375167477	2.303576132	-0.562936702	-0.381960447	1.546448208	-1.320064626	1.928408655	-0.938104179	-2.866512834	0.000249	0.000274	0.004612	0.054277	0.39901	0.959886	3.00E-05	0.000804	0.980251	0.10344	0.007883	6.50E-05	0.00658
P60867 [40S ribosomal protein S20 ...]	-1.304544996	-2.061580171	-1.363136323	-1.087544808	0.311252369	-0.90986171	1.242506775	-0.882602169	-0.757035175	-0.058591326	0.217000188	1.615797365	0.394683286	2.547051771	0.421942827	0.698443849	0.974035364	2.37283254	1.151718461	3.304086946	1.178978003	0.275591515	1.674388691	0.453274612	2.605643097	0.480534154	1.398797176	0.177683097	2.330051582	0.204942639	-1.221114079	0.931254406	-1.193854537	2.152368485	0.027259542	-2.125108943	1	0.521716	1	1	0.164708	0.99977	0.026381	0.988667	0.562514	1	1	0.152535	0.918779
P61027 [Ras-related protein Rab-10 ...]	-1.242044747	-1.098295496	-1.157553772	-1.331079871	-2.14120202	-3.479601117	0.742597867	-3.479699515	0.143749252	0.084490975	-0.089035124	-0.899157273	-2.237556369	1.984642614	-2.237654767	-0.059258276	-0.232784376	-1.042906525	-2.381305621	1.840893362	-2.381404019	-0.173526099	-0.983648248	-2.322047345	1.900151639	-2.322145743	-0.810122149	-2.148521245	2.073677738	-2.148619643	-1.338399096	2.883799887	-1.338497494	4.222198983	-9.84E-05	-4.222297381	0.00521	0.028127	0.016723	0.003355	0.001251	0	1.80E-05	0	0.412464	0.76564	0.784262	0.018831	0
P61161 [Actin-related protein 2 ...]	-0.574507853	2.712801828	-0.271572817	-0.361792829	-0.556476414	0.181701795	0.150943269	0.208961337	3.287309681	0.302935036	0.212715024	0.018031439	0.756209648	0.725451122	0.78346919	-2.984374645	-3.074594657	-3.269278242	-2.531100032	-2.561858558	-2.503840491	-0.090220012	-0.284903597	0.453274612	0.422516086	0.480534154	-0.194683585	0.543494625	0.512736099	0.570754166	0.738178209	0.707419683	0.765437751	-0.030758526	0.027259542	0.058018068	0.822881	0.005235	1	1	0.817726	0.959886	0.95841	0.924998	0.002496	0.967881	1	1	0.505032
P61358;A2A4Q0 [60S ribosomal protein L27 ...]	-1.203753487	-0.990437964	-0.025433823	-1.441845738	0.543524209	-0.454250615	1.004784273	-0.45011501	0.213315522	1.178319664	-0.238092251	1.747277696	0.749502871	2.20853776	0.753638476	0.965004141	-0.451407774	1.533962173	0.536187349	1.995222237	0.540322954	-1.416411915	0.568958032	-0.428816792	1.030218096	-0.424681187	1.985369947	0.987595123	2.446630011	0.991730728	-0.997774824	0.461260064	-0.993639219	1.459034888	0.004135605	-1.454899283	0.11413	1	1.70E-05	0.002433	1.00E-06	0.000525	0	0.000447	0.086938	2.00E-06	0.062581	1.00E-06	5.10E-05
P61982 [14-3-3 protein gamma;14-3-3 protein gamma, N-termi ...]	1.828003771	2.944738464	4.697220671	3.945707958	5.497716889	4.285007867	-0.14406778	5.028547596	1.116734692	2.869216899	2.117704186	3.669713117	2.457004096	-1.972071551	3.200543824	1.752482207	1.000969494	2.552978425	1.340269404	-3.088806244	2.083809132	-0.751512713	0.800496218	-0.412212803	-4.841288451	0.331326925	1.552008931	0.33929991	-4.089775738	1.082839638	-1.212709021	-5.641784669	-0.469169293	-4.429075648	0.743539728	5.172615376	0.000119	5.00E-06	0	0	0	0	0.025621	0	0.019756	4.00E-06	6.30E-05	0	6.00E-06
P62082 [40S ribosomal protein S7 ...]	-0.024573056	1.131078646	-0.003490218	-0.003823267	0.678712352	0.140399124	-0.009147249	0.142063095	1.155651702	0.021082837	0.020749789	0.703285408	0.16497218	0.015425807	0.166636151	-1.134568865	-1.134901913	-0.452366294	-0.990679522	-1.140225895	-0.989015551	-0.000333049	0.682202571	0.143889343	-0.00565703	0.145553314	0.682535619	0.144222391	-0.005323982	0.145886362	-0.538313228	-0.687859601	-0.536649257	-0.149546373	0.001663971	0.151210344	1	0.4485	1	1	0.753355	1	1	1	0.431706	1	1	0.70391	0.999999
P62137;A0A0J9YUU8;A0A0G2JFF1;P63087;P62141 [Serine/threonine-protein phosphatase PP1-alpha cat ...]	1.161220602	1.252690051	-0.006167799	-0.006317754	-0.02758016	0.088174495	-0.012646028	0.100301014	0.091469449	-1.167388401	-1.167538357	-1.188800763	-1.073046108	-1.17386663	-1.060919588	-1.25885785	-1.259007805	-1.280270211	-1.164515557	-1.265336079	-1.152389037	-0.000149955	-0.021412361	0.094342293	-0.006478229	0.106468813	-0.021262406	0.094492249	-0.006328273	0.106618769	0.115754655	0.014934133	0.127881175	-0.100820522	0.01212652	0.112947042	0.465604	0.384482	1	1	1	1	1	1	1	0.453549	0.450444	0.419574	0.505032
P62242 [40S ribosomal protein S8 ...]	-1.362288538	-1.201348172	-1.279803036	-0.87957034	-0.601659029	-0.458401664	1.008935322	-0.454266059	0.160940366	0.082485502	0.482718198	0.760629509	0.903886874	2.37122386	0.908022478	-0.078454864	0.321777833	0.599689143	0.742946508	2.210283494	0.747082113	0.400232696	0.678144007	0.821401372	2.288738358	0.825536977	0.277911311	0.421168675	1.888505662	0.42530428	0.143257364	1.610594351	0.147392969	1.467336987	0.004135605	-1.463201382	0.008866	0.329757	0.036991	0.658746	0.003554	0.000525	0	0.000447	0.435724	0.627346	0.022625	4.50E-05	1.20E-05
P62259;F6WA09;D6REF3 [14-3-3 protein epsilon ...]	0.754736221	2.77384317	3.958260405	3.632111755	4.929563103	3.888284775	0.252655312	4.631824504	2.01910695	3.203524185	2.877375535	4.174826882	3.133548555	-0.502080908	3.877088283	1.184417235	0.858268585	2.155719932	1.114441605	-2.521187858	1.857981334	-0.32614865	0.971302697	-0.06997563	-3.705605093	0.673564098	1.297451347	0.25617302	-3.379456443	0.999712748	-1.041278327	-4.67690779	-0.297738599	-3.635629463	0.743539728	4.379169192	0.299318	0.003043	9.50E-05	8.30E-05	7.00E-06	5.00E-05	0.52802	1.10E-05	0.066416	0.002461	0.00497	0.000375	0.002751
P62264;D3YVF4;D3Z7I1 [40S ribosomal protein S14 ...]	-1.32828263	-2.592739939	0.029368739	-1.232464089	0.698459889	-1.149042122	1.518155502	-0.107252931	-1.264457309	1.357651369	0.095818541	2.026742519	0.179240508	2.846438132	1.221029699	2.622108678	1.36027585	3.291199828	1.443697816	4.110895441	2.485487008	-1.261832828	0.66909115	-1.178410861	1.488786763	-0.13662167	1.930923978	0.083421967	2.750619592	1.125211158	-1.847502011	0.819695613	-0.80571282	2.667197625	1.041789191	-1.625408433	1	0.385777	0.204523	1	0.056951	0.986025	0.012289	0.334691	0.296301	0.267207	1	0.084882	0.999999
P62315 [Small nuclear ribonucleoprotein Sm D1 ...]	-0.879956626	1.063322645	-0.879956626	-0.879956626	-0.879956626	-0.824401071	0.879956626	-0.810512182	1.943279271	0	0	0	0.055555556	1.759913253	0.069444444	-1.943279271	-1.943279271	-1.943279271	-1.887723716	-0.183366019	-1.873834827	0	0	0.055555556	1.759913253	0.069444444	0	0.055555556	1.759913253	0.069444444	0.055555556	1.759913253	0.069444444	1.704357697	0.013888889	-1.690468808	1	1	1	1	1	1	1	1	1	1	1	1	0.999999
P62320 [Small nuclear ribonucleoprotein Sm D3 ...]	-0.045591697	1.554402367	-0.009658017	-0.010141021	-0.051427252	0.173018063	-0.021793276	0.172919665	1.599994063	0.035933679	0.035450675	-0.005835555	0.21860976	0.02379842	0.218511362	-1.564060384	-1.564543388	-1.605829618	-1.381384304	-1.576195643	-1.381482702	-0.000483004	-0.041769234	0.18267608	-0.012135259	0.182577682	-0.04128623	0.183159085	-0.011652255	0.183060687	0.224445315	0.029633975	0.224346917	-0.19481134	-9.84E-05	0.194712941	2.00E-06	0	0.001177	0.000808	1.00E-06	0	7.50E-05	0	0	0.000355	0.000398	0.503657	0
P62702;V9GWY0 [40S ribosomal protein S4, X isoform ...]	-0.351376772	-0.842756144	-0.048441736	-0.138661749	2.152410719	0.404832876	-0.072187811	0.432092418	-0.491379372	0.302935036	0.212715024	2.503787492	0.756209648	0.279188961	0.78346919	0.794314408	0.704094396	2.995166864	1.24758902	0.770568333	1.274848562	-0.090220012	2.200852456	0.453274612	-0.023746075	0.480534154	2.291072468	0.543494625	0.066473937	0.570754166	-1.747577843	-2.224598531	-1.720318302	-0.477020687	0.027259542	0.504280229	0.822881	0.343976	1	1	0.027283	0.959886	1	0.924998	0.687783	0.967881	1	0.011148	0.498448
P62737;P63268;A0A494B9T3;D3YZY0;D3Z2K3;A0A0U1RQ96 [Actin, aortic smooth muscle;Actin, gamma-enteric s ...]	0.479591247	1.206260019	0.439682248	0.701409617	1.210790291	-1.281146099	1.143589726	0.317317898	0.726668772	-0.039908998	0.22181837	0.731199044	-1.760737345	0.663998479	-0.162273349	-0.76657777	-0.504850402	0.004530272	-2.487406117	-0.062670292	-0.888942121	0.261727368	0.771108042	-1.720828347	0.703907478	-0.122364351	0.509380674	-1.982555715	0.442180109	-0.384091719	-2.491936389	-0.067200564	-0.893472393	2.424735825	1.598463997	-0.826271828	0	0	0	2.00E-06	0	0.697814	0	0	8.40E-05	0.967881	0.264964	8.00E-05	5.00E-06
P62748;A0A1Y7VMK3 [Hippocalcin-like protein 1 ...]	-0.045591697	0.868244301	-0.009658017	-0.010141021	-0.051427252	0.173018063	-0.021793276	0.172919665	0.913835997	0.035933679	0.035450675	-0.005835555	0.21860976	0.02379842	0.218511362	-0.877902318	-0.878385322	-0.919671552	-0.695226238	-0.890037577	-0.695324636	-0.000483004	-0.041769234	0.18267608	-0.012135259	0.182577682	-0.04128623	0.183159085	-0.011652255	0.183060687	0.224445315	0.029633975	0.224346917	-0.19481134	-9.84E-05	0.194712941	2.00E-06	0	0.001177	0.000808	1.00E-06	0	7.50E-05	0	0	0.000355	0.000398	0.503657	0
P62751 [60S ribosomal protein L23a ...]	0	1.481738365	0	0	0	0.055555556	0	0.069444444	1.481738365	0	0	0	0.055555556	0	0.069444444	-1.481738365	-1.481738365	-1.481738365	-1.42618281	-1.481738365	-1.412293921	0	0	0.055555556	0	0.069444444	0	0.055555556	0	0.069444444	0.055555556	0	0.069444444	-0.055555556	0.013888889	0.069444444	1	1	1	1	1	1	1	1	1	1	1	1	0.999999
P62754 [40S ribosomal protein S6 ...]	-1.784874212	-0.284420055	-0.667890342	0.897205077	-1.784148247	-1.619902032	1.751153907	-1.618238061	1.500454157	1.11698387	2.682079289	0.000725964	0.16497218	3.536028119	0.166636151	-0.383470286	1.181625132	-1.499728192	-1.335481977	2.035573962	-1.333818006	1.565095419	-1.116257906	-0.95201169	2.419044249	-0.950347719	-2.681353325	-2.517107109	0.85394883	-2.515443138	0.164246216	3.535302154	0.165910187	3.371055939	0.001663971	-3.369391968	1	0.269953	0.572741	0.046524	1	1	0.010691	1	0.267123	0.515037	0.046509	1	0.999999
P62806 [Histone H4 ...]	1.924391119	2.777992414	0.069442431	1.12930573	0.706212896	-1.378006462	1.276354075	-0.105471531	0.853601295	-1.854948689	-0.795085389	-1.218178223	-3.302397582	-0.648037044	-2.02986265	-2.708549984	-1.648686684	-2.071779519	-4.155998877	-1.501638339	-2.883463945	1.0598633	0.636770465	-1.447448893	1.206911645	-0.174913961	-0.423092834	-2.507312192	0.147048345	-1.234777261	-2.084219358	0.570141179	-0.811684427	2.654360537	1.272534932	-1.381825606	2.00E-06	0	0.002227	2.80E-05	9.40E-05	1	1.60E-05	0.004008	0.022806	0.000207	0.035426	0.003192	2.00E-06
P62814 [V-type proton ATPase subunit B, brain isoform ...]	0	1.287513085	0	0	0	0.055555556	0	0.069444444	1.287513085	0	0	0	0.055555556	0	0.069444444	-1.287513085	-1.287513085	-1.287513085	-1.23195753	-1.287513085	-1.218068641	0	0	0.055555556	0	0.069444444	0	0.055555556	0	0.069444444	0.055555556	0	0.069444444	-0.055555556	0.013888889	0.069444444	1	1	1	1	1	1	1	1	1	1	1	1	0.999999
P62827;Q14AA6;Q61820 [GTP-binding nuclear protein Ran ...]	0.063271854	0.909130989	0.847331522	0.856970849	-0.151019961	1.18430644	-1.032801544	-0.499564008	0.845859135	0.784059668	0.793698995	-0.214291815	1.121034586	-1.096073398	-0.562835863	-0.061799467	-0.05216014	-1.06015095	0.275175451	-1.941932533	-1.408694998	0.009639327	-0.998351483	0.336974918	-1.880133066	-1.346895531	-1.00799081	0.327335591	-1.889772393	-1.356534858	1.335326401	-0.881781583	-0.348544048	-2.217107984	-1.683870448	0.533237535	0.298366	1	1	1	0.234423	1	0.020396	0.083329	0.365935	0.434983	0.421263	1	0.223757
P62830;A2A6F8 [60S ribosomal protein L23 ...]	0	0.802513542	0	0	1.197364456	0.055555556	0	0.069444444	0.802513542	0	0	1.197364456	0.055555556	0	0.069444444	-0.802513542	-0.802513542	0.394850914	-0.746957986	-0.802513542	-0.733069097	0	1.197364456	0.055555556	0	0.069444444	1.197364456	0.055555556	0	0.069444444	-1.141808901	-1.197364456	-1.127920012	-0.055555556	0.013888889	0.069444444	1	1	1	1	1	1	1	1	1	1	1	1	0.999999
P62855 [40S ribosomal protein S26 ...]	-0.885186237	0.222071721	0.140891353	-0.87048535	-0.891747756	-0.775993102	0.851521569	-0.763866582	1.107257958	1.02607759	0.014700887	-0.006561519	0.109193135	1.736707806	0.121319655	-0.081180369	-1.092557072	-1.113819478	-0.998064823	0.629449847	-0.985938303	-1.011376703	-1.032639109	-0.916884454	0.710630216	-0.904757934	-0.021262406	0.094492249	1.722006919	0.106618769	0.115754655	1.743269325	0.127881175	1.62751467	0.01212652	-1.61538815	1	0.486618	0.653337	1	1	1	0.291856	1	0.467388	0.58429	1	1	0.999999
P62908;D3YV43;A0A140LI77 [40S ribosomal protein S3 ...]	-2.073323822	-0.797382333	-1.295662803	-0.558969333	0.56993619	-1.067871392	1.61840505	-1.063735787	1.275941488	0.777661019	1.514354489	2.643260011	1.00545243	3.691728872	1.009588035	-0.498280469	0.238413	1.367318523	-0.270489059	2.415787383	-0.266353454	0.73669347	1.865598992	0.227791411	2.914067853	0.231927016	1.128905523	-0.508902059	2.177374383	-0.504766454	-1.637807582	1.04846886	-1.633671977	2.686276442	0.004135605	-2.682140837	0.641222	0.22968	0.883619	0.224806	0.003891	0.543689	0.000264	0.523995	0.062141	0.278158	0.079268	0.001205	0.151882
P62918 [60S ribosomal protein L8 ...]	-0.950631792	-1.163360014	0.758145603	-0.159881002	0.827082138	-1.77935186	1.930576647	-1.779450258	-0.212728222	1.708777396	0.79075079	1.77771393	-0.828720067	2.881208439	-0.828818465	1.921505617	1.003479012	1.990442152	-0.615991846	3.093936661	-0.616090244	-0.918026606	0.068936534	-2.537497463	1.172431043	-2.537595861	0.98696314	-1.619470857	2.090457649	-1.619569255	-2.606433998	1.103494509	-2.606532396	3.709928506	-9.84E-05	-3.710026904	4.60E-05	0.000889	0	2.00E-06	0	0.42937	0	0.424735	0.286664	3.00E-06	0.000872	0	0.00016
P62962;Q5SX49;CON__P02584 [Profilin-1;Profilin ...]	0.606001612	5.487634067	0.584206793	0.519202888	1.18162947	-0.039160927	0.589694585	-0.035025322	4.881632454	-0.02179482	-0.086798724	0.575627858	-0.645162539	-0.016307028	-0.641026934	-4.903427274	-4.968431178	-4.306004596	-5.526794993	-4.897939482	-5.522659389	-0.065003904	0.597422678	-0.62336772	0.005487792	-0.619232115	0.662426582	-0.558363815	0.070491696	-0.55422821	-1.220790397	-0.591934886	-1.216654792	0.628855512	0.004135605	-0.624719907	0.026459	0	0.102377	0.037923	0.023366	0.351646	0.086831	0.341092	2.00E-06	1	1	0.506325	0.243545
P63028;D3YU75 [Translationally-controlled tumor protein ...]	0.556333973	1.736946045	-0.009658017	-0.010141021	-0.051427252	0.173018063	-0.021793276	0.172919665	1.180612071	-0.565991991	-0.566474995	-0.607761225	-0.38331591	-0.57812725	-0.383414308	-1.746604062	-1.747087066	-1.788373296	-1.563927982	-1.758739321	-1.56402638	-0.000483004	-0.041769234	0.18267608	-0.012135259	0.182577682	-0.04128623	0.183159085	-0.011652255	0.183060687	0.224445315	0.029633975	0.224346917	-0.19481134	-9.84E-05	0.194712941	1.00E-06	0	0.001496	0.001045	1.00E-06	0	0.000102	0	0	1.00E-06	1.00E-06	0	8.00E-06
P63038 [60 kDa heat shock protein, mitochondrial ...]	-1.685041185	-2.05535186	-0.749595056	-0.025109698	-0.154712108	-0.327056824	0.877590482	-0.32292122	-0.370310674	0.93544613	1.659931488	1.530329078	1.357984361	2.562631668	1.362119966	1.305756804	2.030242162	1.900639752	1.728295035	2.932942342	1.73243064	0.724485358	0.594882948	0.422538231	1.627185538	0.426673836	-0.12960241	-0.301947127	0.90270018	-0.297811522	-0.172344717	1.03230259	-0.168209112	1.204647307	0.004135605	-1.200511702	1.00E-06	0	0.437519	0	4.00E-06	1.10E-05	0	9.00E-06	0.000223	2.20E-05	0	0	0
P63101;A0A2I3BQ03;D3YXN6;D3YXF4;D3YW45 [14-3-3 protein zeta/delta ...]	0.912141081	2.011661903	2.357374746	2.488104564	3.654644847	1.974954822	2.165985265	2.718494551	1.099520823	1.445233666	1.575963483	2.742503766	1.062813742	1.253844184	1.80635347	0.345712843	0.476442661	1.642982944	-0.036707081	0.154323362	0.706832647	0.130729818	1.297270101	-0.382419924	-0.191389481	0.361119804	1.166540283	-0.513149742	-0.322119299	0.230389987	-1.679690025	-1.488659582	-0.936150296	0.191030443	0.743539728	0.552509286	3.00E-06	3.00E-06	0	0	0	0	2.00E-06	0	0.042498	0.00097	0.000555	7.00E-06	0.006825
P63260;P60710;E9Q5F4;G3UZ07;E9Q1F2;G3UYG0;E9Q606;A0A1D5RM20;B1ATY1;Q8BFZ3;F8WGM8;E9Q2D1;F6WX90;V9GXQ2 [Actin, cytoplasmic 2;Actin, cytoplasmic 2, N-termi ...]	0.352332339	1.078627933	0.290279295	0.814029495	1.126223276	-1.349412681	1.047712081	0.167900538	0.726295594	-0.062053044	0.461697156	0.773890937	-1.70174502	0.695379742	-0.184431801	-0.788348638	-0.264598438	0.047595343	-2.428040614	-0.030915852	-0.910727395	0.5237502	0.835943981	-1.639691976	0.757432786	-0.122378757	0.312193781	-2.163442176	0.233682586	-0.646128957	-2.475635957	-0.078511195	-0.958322738	2.397124762	1.517313219	-0.879811543	0	0	0	0	0	0.040734	0	0	2.00E-06	0.527998	0.002515	1.00E-06	0
P63325;A0A338P731;Q3UW83;A0A338P7K4;A0A3B2W864 [40S ribosomal protein S10 ...]	-1.303229029	-0.182638109	-1.033647396	-1.110104139	-0.951197232	-0.482844557	0.851957937	-0.506066891	1.120590921	0.269581633	0.19312489	0.352031797	0.820384473	2.155186966	0.797162138	-0.851009288	-0.927466031	-0.768559124	-0.300206448	1.034596045	-0.323428783	-0.076456743	0.082450164	0.55080284	1.885605333	0.527580505	0.158906907	0.627259583	1.962062076	0.604037248	0.468352676	1.803155169	0.445130341	1.334802493	-0.023222335	-1.358024828	0.763326	0.489636	1	1	1	0.905032	0.045206	0.924998	0.200916	0.967881	1	0.817237	0.399969
P63328 [Serine/threonine-protein phosphatase 2B catalytic ...]	0	1.405133705	0	0	0	0.055555556	0	0.069444444	1.405133705	0	0	0	0.055555556	0	0.069444444	-1.405133705	-1.405133705	-1.405133705	-1.349578149	-1.405133705	-1.33568926	0	0	0.055555556	0	0.069444444	0	0.055555556	0	0.069444444	0.055555556	0	0.069444444	-0.055555556	0.013888889	0.069444444	1	1	1	1	1	1	1	1	1	1	1	1	0.999999
P68040 [Guanine nucleotide-binding protein subunit beta-2- ...]	-1.908764774	-1.978207903	-1.372181784	-1.538375536	-0.275816813	-0.550780413	1.101314071	-0.546644808	-0.069443129	0.536582989	0.370389238	1.632947961	1.357984361	3.010078844	1.362119966	0.606026119	0.439832368	1.70239109	1.42742749	3.079521974	1.431563095	-0.166193751	1.096364972	0.821401372	2.473495855	0.825536977	1.262558723	0.987595123	2.639689606	0.991730728	-0.2749636	1.377130884	-0.270827995	1.652094483	0.004135605	-1.647958879	0	0	0.000374	7.00E-06	0	1.00E-06	0	1.00E-06	0.215988	1.00E-06	2.80E-05	0	0
P68134;P68033 [Actin, alpha skeletal muscle;Actin, alpha cardiac ...]	0.479591247	1.206260019	0.439682248	0.701409617	1.210790291	-1.281146099	1.143589726	0.317317898	0.726668772	-0.039908998	0.22181837	0.731199044	-1.760737345	0.663998479	-0.162273349	-0.76657777	-0.504850402	0.004530272	-2.487406117	-0.062670292	-0.888942121	0.261727368	0.771108042	-1.720828347	0.703907478	-0.122364351	0.509380674	-1.982555715	0.442180109	-0.384091719	-2.491936389	-0.067200564	-0.893472393	2.424735825	1.598463997	-0.826271828	0	0	0	2.00E-06	0	0.697814	0	0	8.40E-05	0.967881	0.264964	8.00E-05	5.00E-06
P68254 [14-3-3 protein theta ...]	1.218673181	2.690656581	4.354983497	3.868718467	5.441895207	4.285007867	-0.14406778	5.028547596	1.471983401	3.136310317	2.650045286	4.223222026	3.066334687	-1.362740961	3.809874415	1.664326916	1.178061886	2.751238626	1.594351286	-2.834724361	2.337891015	-0.48626503	1.086911709	-0.06997563	-4.499051277	0.673564098	1.57317674	0.4162894	-4.012786247	1.159829129	-1.156887339	-5.585962987	-0.413347611	-4.429075648	0.743539728	5.172615376	0.004588	1.80E-05	0	0	0	0	0.025621	0	0.006463	3.00E-06	1.60E-05	0	2.00E-06
P68369;P05214 [Tubulin alpha-1A chain;Tubulin alpha-3 chain ...]	-0.010027499	1.910687762	0.555435589	0.516956431	0.746938634	-0.001468405	-0.387663734	0.296480056	1.920715261	0.565463088	0.52698393	0.756966134	0.008559095	-0.377636234	0.306507555	-1.355252173	-1.39373133	-1.163749127	-1.912156166	-2.298351495	-1.614207705	-0.038479158	0.191503046	-0.556903993	-0.943099322	-0.258955533	0.229982203	-0.518424836	-0.904620165	-0.220476375	-0.748407039	-1.134602368	-0.450458578	-0.386195329	0.297948461	0.68414379	0.402175	0.001675	0.978625	1	0.443771	0.441239	0.351234	1	0.000388	0.190789	0.228033	0.075261	0.999999
P68373;P05213;A0A2R8VHF3;Q9JJZ2;Q3UX10 [Tubulin alpha-1C chain;Tubulin alpha-1B chain;Tubu ...]	-0.010027499	1.910687762	0.555435589	0.516956431	0.746938634	-0.001468405	-0.387663734	0.296480056	1.920715261	0.565463088	0.52698393	0.756966134	0.008559095	-0.377636234	0.306507555	-1.355252173	-1.39373133	-1.163749127	-1.912156166	-2.298351495	-1.614207705	-0.038479158	0.191503046	-0.556903993	-0.943099322	-0.258955533	0.229982203	-0.518424836	-0.904620165	-0.220476375	-0.748407039	-1.134602368	-0.450458578	-0.386195329	0.297948461	0.68414379	0.402175	0.001675	0.978625	1	0.443771	0.441239	0.351234	1	0.000388	0.190789	0.228033	0.075261	0.999999
P68510 [14-3-3 protein eta ...]	1.296261429	2.746643084	4.354983497	3.909511521	5.214054948	4.285007867	-0.14406778	5.028547596	1.450381655	3.058722069	2.613250092	3.917793519	2.988746439	-1.440329209	3.732286167	1.608340414	1.162868437	2.467411864	1.538364784	-2.890710864	2.281904512	-0.445471976	0.85907145	-0.06997563	-4.499051277	0.673564098	1.304543427	0.375496346	-4.053579301	1.119036075	-0.92904708	-5.358122728	-0.185507352	-4.429075648	0.743539728	5.172615376	0.014435	0.000114	0	0	0	0	0.196772	0	0.023946	2.70E-05	0.000104	2.00E-06	2.10E-05
P70168 [Importin subunit beta-1 ...]	-0.021018641	0.885579546	-0.006167799	-0.006317754	-0.02758016	0.088174495	-0.012646028	0.100301014	0.906598187	0.014850842	0.014700887	-0.006561519	0.109193135	0.008372613	0.121319655	-0.891747345	-0.891897301	-0.913159706	-0.797405052	-0.898225574	-0.785278532	-0.000149955	-0.021412361	0.094342293	-0.006478229	0.106468813	-0.021262406	0.094492249	-0.006328273	0.106618769	0.115754655	0.014934133	0.127881175	-0.100820522	0.01212652	0.112947042	1	0.584643	1	1	1	1	1	1	0.563255	1	1	1	0.999999
P70441 [Na(+)/H(+) exchange regulatory cofactor NHE-RF1 ...]	0.773472797	0	0	1.321787727	2.280123167	0.055555556	0	0.069444444	-0.773472797	-0.773472797	0.54831493	1.50665037	-0.717917241	-0.773472797	-0.704028353	0	1.321787727	2.280123167	0.055555556	0	0.069444444	1.321787727	2.280123167	0.055555556	0	0.069444444	0.958335441	-1.266232171	-1.321787727	-1.252343282	-2.224567612	-2.280123167	-2.210678723	-0.055555556	0.013888889	0.069444444	0.000683	1	1	8.80E-05	0	0.643403	1	0.481152	0.000661	0.000698	0.060523	4.00E-06	0.001133
P70460 [Vasodilator-stimulated phosphoprotein ...]	0.300501992	0.90817311	-0.126799934	1.356000942	-0.63460232	0.694601438	-0.14406778	0.698737043	0.607671118	-0.427301926	1.055498949	-0.935104312	0.394099446	-0.444569772	0.398235051	-1.034973044	0.447827832	-1.54277543	-0.213571672	-1.05224089	-0.209436067	1.482800875	-0.507802387	0.821401372	-0.017267846	0.825536977	-1.990603262	-0.661399504	-1.500068722	-0.657263899	1.329203758	0.49053454	1.333339363	-0.838669218	0.004135605	0.842804823	0.008643	5.60E-05	0.000374	0	0	1.00E-06	0.000127	1.00E-06	0.000377	8.00E-06	1.00E-06	0	1.70E-05
P80313;A0A0N4SV00 [T-complex protein 1 subunit eta ...]	-0.351376772	-0.017375823	-0.048441736	1.036481478	1.269170871	0.404832876	-0.072187811	0.432092418	0.334000949	0.302935036	1.387858251	1.620547643	0.756209648	0.279188961	0.78346919	-0.031065913	1.053857301	1.286546694	0.422208699	-0.054811989	0.44946824	1.084923215	1.317612607	0.453274612	-0.023746075	0.480534154	0.232689392	-0.631648602	-1.10866929	-0.604389061	-0.864337995	-1.341358682	-0.837078453	-0.477020687	0.027259542	0.504280229	0.822881	1	1	0.348396	0.210034	0.959886	1	0.924998	0.820397	0.967881	0.152093	0.089192	0.505032
P80314;A0A1W2P7B7;A0A1W2P828;A0A1W2P871;A0A1W2P6Q3 [T-complex protein 1 subunit beta ...]	-1.796417158	-2.316216419	-1.259834169	-1.13111206	0.425668378	-0.438432797	0.988966455	-0.434297193	-0.519799261	0.536582989	0.665305099	2.222085537	1.357984361	2.785383614	1.362119966	1.05638225	1.185104359	2.741884798	1.877783622	3.305182875	1.881919227	0.128722109	1.685502548	0.821401372	2.248800625	0.825536977	1.556780438	0.692679262	2.120078515	0.696814867	-0.864101176	0.563298077	-0.859965571	1.427399253	0.004135605	-1.423263648	3.00E-05	0.000144	0.036991	0.458563	3.00E-06	0.000525	1.00E-06	0.000447	0.047839	0.000639	0.001001	0	0
P80316;E0CZA1 [T-complex protein 1 subunit epsilon ...]	-0.624754365	-1.326233779	-1.561805734	-0.217126209	1.150428167	-1.099336681	1.392753742	-0.521142705	-0.701479414	-0.937051369	0.407628156	1.775182532	-0.474582316	2.017508107	0.10361166	-0.235571955	1.10910757	2.476661946	0.226897098	2.718987521	0.805091074	1.344679525	2.712233901	0.462469053	2.954559476	1.040663029	1.367554376	-0.882210472	1.609879951	-0.304016496	-2.249764849	0.242325575	-1.671570873	2.492090423	0.578193976	-1.913896447	0.402175	1	1	0.150455	0.004487	0.99977	0.002368	0.379288	0.323275	0.247299	0.686328	0.013094	0.719788
P80318;E9Q133;Q3U0I3;F6Q609 [T-complex protein 1 subunit gamma ...]	-1.691414074	-0.430685535	-1.154831085	-1.063199254	0.702753481	-0.333429713	0.883963371	-0.329294108	1.260728539	0.536582989	0.62821482	2.394167555	1.357984361	2.575377445	1.362119966	-0.72414555	-0.63251372	1.133439015	0.097255822	1.314648905	0.101391427	0.09163183	1.857584565	0.821401372	2.038794455	0.825536977	1.765952735	0.729769541	1.947162625	0.733905146	-1.036183194	0.18120989	-1.032047589	1.217393084	0.004135605	-1.213257479	1.00E-06	5.30E-05	0.002981	0.102293	0	1.50E-05	0	1.20E-05	0	2.20E-05	8.70E-05	0	0
P84078;P61205;Q8BSL7;D3YV25;E9Q2C2;A2A6T9 [ADP-ribosylation factor 1;ADP-ribosylation factor ...]	1.199452097	2.396444309	-0.088016215	1.913529157	0.573231393	0.462786625	-0.093673245	0.43956429	1.196992212	-1.287468311	0.71407706	-0.626220704	-0.736665472	-1.293125342	-0.759887806	-2.484460524	-0.482915152	-1.823212916	-1.933657684	-2.490117554	-1.956880019	2.001545372	0.661247607	0.55080284	-0.00565703	0.527580505	-1.340297764	-1.450742532	-2.007202402	-1.473964867	-0.110444768	-0.666904638	-0.133667102	-0.55645987	-0.023222335	0.533237535	0.221052	0.011554	1	0.041341	0.723683	0.905032	1	0.924998	0.174367	0.147896	0.490645	0.53832	0.480385
P84084 [ADP-ribosylation factor 5 ...]	0.691395654	1.878423229	-0.126799934	1.433445542	0.89614159	0.694601438	-0.14406778	0.698737043	1.187027575	-0.818195588	0.742049888	0.204745936	0.003205784	-0.835463434	0.007341389	-2.005223163	-0.444977688	-0.982281639	-1.183821791	-2.02249101	-1.179686187	1.560245476	1.022941524	0.821401372	-0.017267846	0.825536977	-0.537303952	-0.738844104	-1.577513322	-0.734708499	-0.201540152	-1.04020937	-0.197404547	-0.838669218	0.004135605	0.842804823	0.0057	0	0.002239	0	1.00E-06	1.00E-05	0.001086	8.00E-06	2.40E-05	0.000419	0.000847	0.273517	0.999999
P84096 [Rho-related GTP-binding protein RhoG ...]	0.680991809	0.467714231	0.940326778	1.304732702	0.127693788	0.139107333	-0.236283654	0.143242938	-0.213277578	0.259334969	0.623740893	-0.553298021	-0.541884476	-0.917275463	-0.537748871	0.472612547	0.837018471	-0.340020443	-0.328606898	-0.703997885	-0.324471293	0.364405924	-0.81263299	-0.801219445	-1.176610432	-0.79708384	-1.177038914	-1.165625369	-1.541016356	-1.161489764	0.011413545	-0.363977441	0.01554915	-0.375390987	0.004135605	0.379526591	0.179958	0.597128	0.037002	0.003591	0.915264	0.99977	0.186222	1	0.523826	0.305962	0.014182	0.024235	0.02761
P84104 [Serine/arginine-rich splicing factor 3 ...]	2.352595468	2.380140199	0	0	0	0.055555556	0	0.069444444	0.027544731	-2.352595468	-2.352595468	-2.352595468	-2.297039912	-2.352595468	-2.283151023	-2.380140199	-2.380140199	-2.380140199	-2.324584643	-2.380140199	-2.310695754	0	0	0.055555556	0	0.069444444	0	0.055555556	0	0.069444444	0.055555556	0	0.069444444	-0.055555556	0.013888889	0.069444444	1	0	1	1	1	1	1	1	1	1	1	1	0.999999
P97315 [Cysteine and glycine-rich protein 1 ...]	-0.537636594	-2.623706434	-1.071391906	-1.984227342	-2.005489748	-1.889735093	-1.990555615	-1.877608573	-2.08606984	-0.533755312	-1.446590748	-1.467853154	-1.3520985	-1.452919022	-1.33997198	1.552314529	0.639479092	0.618216686	0.733971341	0.633150819	0.746097861	-0.912835436	-0.934097842	-0.818343188	-0.91916371	-0.806216668	-0.021262406	0.094492249	-0.006328273	0.106618769	0.115754655	0.014934133	0.127881175	-0.100820522	0.01212652	0.112947042	0.061949	0.002334	0.036593	0.00673	0.006099	0.007973	0.005842	0.007646	0.118235	0.929004	0.309465	0.297042	0.372977
P97351 [40S ribosomal protein S3a ...]	-1.514930335	-0.74447755	-0.978347346	0.567144589	0.949402224	-0.156945974	0.707479632	-0.152810369	0.770452785	0.536582989	2.082074923	2.464332559	1.357984361	2.222409967	1.362119966	-0.233869796	1.311622138	1.693879774	0.587531576	1.451957182	0.591667181	1.545491934	1.92774957	0.821401372	1.685826977	0.825536977	0.382257636	-0.724090562	0.140335043	-0.719954958	-1.106348198	-0.241922593	-1.102212593	0.864425606	0.004135605	-0.860290001	1.10E-05	0.844672	0.022021	2.00E-06	0	0.000241	0	0.000201	1.70E-05	0.000303	0	0	0
P97369;A8XU21 [Neutrophil cytosol factor 4 ...]	0.538559228	0.353484565	-0.126799934	0.299831383	-0.63460232	0.694601438	-0.14406778	0.698737043	-0.185074663	-0.665359162	-0.238727845	-1.173161548	0.15604221	-0.682627008	0.160177815	-0.480284499	-0.053653182	-0.988086885	0.341116873	-0.497552345	0.345252478	0.426631317	-0.507802387	0.821401372	-0.017267846	0.825536977	-0.934433703	0.394770055	-0.443899163	0.39890566	1.329203758	0.49053454	1.333339363	-0.838669218	0.004135605	0.842804823	0.000939	0.008207	0.002239	0.370362	1.00E-06	1.00E-05	0.001086	8.00E-06	0.059064	2.20E-05	0.172346	0	0.118197
P97384;D3Z7U0 [Annexin A11;Annexin ...]	-0.436043938	1.387232168	-0.364415523	-0.530609274	-0.579260474	0.456985849	0.093547809	0.461121454	1.823276106	0.071628415	-0.094565336	-0.143216535	0.893029787	0.529591747	0.897165392	-1.751647691	-1.917841442	-1.966492642	-0.930246319	-1.293684359	-0.926110714	-0.166193751	-0.214844951	0.821401372	0.457963332	0.825536977	-0.0486512	0.987595123	0.624157083	0.991730728	1.036246323	0.672808283	1.040381927	-0.36343804	0.004135605	0.367573645	0.008254	0	0.031943	0.001853	0.003924	0.00042	0.335725	0.000349	0	0.685934	0.512061	0.381197	9.00E-06
P97425 [Eosinophil cationic protein 2 ...]	1.301555784	0.304616002	-0.009658017	-0.010141021	-0.051427252	0.173018063	-0.021793276	0.172919665	-0.996939783	-1.311213802	-1.311696806	-1.352983036	-1.128537721	-1.323349061	-1.128636119	-0.314274019	-0.314757023	-0.356043253	-0.131597939	-0.326409278	-0.131696337	-0.000483004	-0.041769234	0.18267608	-0.012135259	0.182577682	-0.04128623	0.183159085	-0.011652255	0.183060687	0.224445315	0.029633975	0.224346917	-0.19481134	-9.84E-05	0.194712941	0	4.00E-06	0.001496	0.001045	1.00E-06	0	0.000102	0	0	0	0	0	0
P97426;O35290 [Eosinophil cationic protein 1;Eosinophil cationic- ...]	2.366739328	0.899231301	0	0	0	0.055555556	0	0.069444444	-1.467508028	-2.366739328	-2.366739328	-2.366739328	-2.311183773	-2.366739328	-2.297294884	-0.899231301	-0.899231301	-0.899231301	-0.843675745	-0.899231301	-0.829786856	0	0	0.055555556	0	0.069444444	0	0.055555556	0	0.069444444	0.055555556	0	0.069444444	-0.055555556	0.013888889	0.069444444	1	1	1	1	1	1	1	1	1	1	1	1	0.999999
P97429;F7ANV6;D3Z0S1;A0A0N4SW89;A0A0N4SV57;S4R1F2 [Annexin A4;Annexin ...]	-1.830372099	-1.37527767	-1.29378911	-1.106506499	0.820754469	-0.472387738	1.022921396	-0.468252133	0.455094429	0.536582989	0.7238656	2.651126568	1.357984361	2.853293495	1.362119966	0.08148856	0.268771171	2.196032139	0.902889932	2.398199066	0.907025537	0.187282611	2.114543579	0.821401372	2.316710506	0.825536977	1.927260968	0.634118761	2.129427895	0.638254366	-1.293142207	0.202166927	-1.289006602	1.495309134	0.004135605	-1.491173529	3.00E-05	0.018446	0.036991	0.802912	0	0.000525	1.00E-06	0.000447	0.004905	0.000639	0.000609	0	0
P97797 [Tyrosine-protein phosphatase non-receptor type sub ...]	0	1.382135289	0	0	0	0.055555556	0	0.069444444	1.382135289	0	0	0	0.055555556	0	0.069444444	-1.382135289	-1.382135289	-1.382135289	-1.326579733	-1.382135289	-1.312690845	0	0	0.055555556	0	0.069444444	0	0.055555556	0	0.069444444	0.055555556	0	0.069444444	-0.055555556	0.013888889	0.069444444	1	1	1	1	1	1	1	1	1	1	1	1	0.999999
P97872;Q14DT3;Q8C116 [Dimethylaniline monooxygenase [N-oxide-forming] 5 ...]	-3.220515454	-5.634154804	-2.650151925	-2.524186302	-0.874252765	-1.489558403	1.489558403	-3.220930656	-2.41363935	0.570363529	0.696329152	2.346262689	1.730957051	4.710073857	-0.000415202	2.984002879	3.109968502	4.759902039	4.144596402	7.123713207	2.413224149	0.125965623	1.77589916	1.160593523	4.139710328	-0.57077873	1.649933537	1.0346279	4.013744705	-0.696744353	-0.615305637	2.363811168	-2.34667789	2.979116805	-1.731372253	-4.710489058	0.000512	0	0.018285	0.012949	0.11564	1	8.00E-06	0.005864	4.30E-05	0.231909	0.081732	5.20E-05	0.000514
P99024;Q9CWF2;Q7TMM9;P68372;Q9D6F9;Q922F4;Q9ERD7;CON__ENSEMBL:ENSBTAP00000025008;A2AQ07;G3UZR1;A0A1D5RM76 [Tubulin beta-5 chain;Tubulin beta-2B chain;Tubulin ...]	-0.459779939	2.10278772	-1.178714835	0.153112571	-0.21068529	-2.892899352	1.042657335	-2.888763747	2.562567659	-0.718934896	0.61289251	0.249094649	-2.433119413	1.502437274	-2.428983808	-3.281502555	-1.949675149	-2.31347301	-4.995687071	-1.060130385	-4.991551467	1.331827406	0.968029545	-1.714184517	2.22137217	-1.710048912	-0.363797861	-3.046011923	0.889544764	-3.041876318	-2.682214062	1.253342625	-2.678078457	3.935556687	0.004135605	-3.931421082	0.070538	1.00E-06	0.958194	0.001611	0.013053	7.50E-05	2.90E-05	6.60E-05	3.00E-06	0.024332	0.048251	0.465459	5.00E-06
P99026 [Proteasome subunit beta type-4 ...]	-0.024573056	1.18563866	-0.003490218	1.465636746	1.358803694	0.140399124	-0.009147249	0.142063095	1.210211716	0.021082837	1.490209802	1.38337675	0.16497218	0.015425807	0.166636151	-1.189128879	0.279998086	0.173165034	-1.045239536	-1.194785909	-1.043575565	1.469126964	1.362293912	0.143889343	-0.00565703	0.145553314	-0.106833052	-1.325237622	-1.474783995	-1.323573651	-1.21840457	-1.367950943	-1.216740599	-0.149546373	0.001663971	0.151210344	1	0.425904	1	0.315577	0.351084	1	1	1	0.412464	1	0.300207	0.336569	0.999999
Q00612;A3KG36;Q836V0;G3UWD6;REV__P46662;P97324 [Glucose-6-phosphate 1-dehydrogenase X;Glucose-6-ph ...]	0.892285921	2.212727707	-0.152697866	0.624050114	1.977547768	-0.067058914	0.617592572	-0.062923309	1.320441786	-1.044983787	-0.268235807	1.085261847	-0.959344835	-0.274693349	-0.95520923	-2.365425573	-1.588677594	-0.235179939	-2.279786621	-1.595135135	-2.275651017	0.77674798	2.130245634	0.085638952	0.770290439	0.089774557	1.353497654	-0.691109028	-0.006457541	-0.686973423	-2.044606682	-1.359955195	-2.040471077	0.684651487	0.004135605	-0.680515882	0	0	0.05319	1.00E-06	0	0.000525	3.00E-06	0.000447	1.00E-06	0.000552	0.050384	4.00E-06	1.20E-05
Q00623;A0A1L1STX7;CON__P15497 [Apolipoprotein A-I;Proapolipoprotein A-I;Truncated ...]	0.202790733	-0.300169915	2.385830705	-1.569039798	-1.815168839	0.544383914	-1.791639571	-0.590508492	-0.502960648	2.183039972	-1.771830531	-2.017959572	0.341593181	-1.994430304	-0.793299225	2.68600062	-1.268869883	-1.514998923	0.844553829	-1.491469656	-0.290338577	-3.954870503	-4.200999543	-1.841446791	-4.177470276	-2.976339197	-0.246129041	2.113423712	-0.222599773	0.978531306	2.359552752	0.023529267	1.224660347	-2.336023485	-1.134892406	1.201131079	0	0	3.80E-05	0	0	0	0	0	3.70E-05	0	0	0	0.000652
Q00897 [Alpha-1-antitrypsin 1-4 ...]	0.003783252	-0.161388311	1.313833117	-1.380786978	-0.807862468	-0.131129516	-1.595008612	0.0957581	-0.165171563	1.310049866	-1.384570229	-0.81164572	-0.134912768	-1.598791863	0.091974848	1.475221429	-1.219398666	-0.646474157	0.030258795	-1.4336203	0.257146411	-2.694620095	-2.121695586	-1.444962634	-2.908841729	-1.218075017	0.572924509	1.249657461	-0.214221634	1.476545078	0.676732952	-0.787146143	0.903620569	-1.463879095	0.226887617	1.690766712	3.00E-06	1.00E-06	0.145275	0	0	2.00E-06	0	5.00E-06	0.437577	1.90E-05	1.50E-05	0.000559	0.571224
Q00898 [Alpha-1-antitrypsin 1-5 ...]	0.902856095	1.105111047	1.136657797	-0.38627553	-1.37049651	0.809541871	-1.577827908	-0.573368509	0.202254953	0.233801703	-1.289131624	-2.273352605	-0.093314223	-2.480684003	-1.476224603	0.03154675	-1.491386577	-2.475607558	-0.295569176	-2.682938955	-1.678479556	-1.522933327	-2.507154308	-0.327115926	-2.714485705	-1.710026306	-0.984220981	1.195817401	-1.191552378	-0.187092979	2.180038382	-0.207331397	0.797128002	-2.387369779	-1.38291038	1.004459399	0.009283	0.047669	0.074158	6.00E-06	0	0.004439	0	2.00E-06	0.442147	0.381571	0.000151	1.00E-06	0.880524
Q01339;I7HJR3;CON__P17690 [Beta-2-glycoprotein 1 ...]	0.717359763	-1.591377704	0.657986445	-1.794640795	-2.115326773	-1.232941788	-2.071611006	-1.228806183	-2.308737468	-0.059373318	-2.512000558	-2.832686536	-1.950301551	-2.788970769	-1.946165946	2.24936415	-0.20326309	-0.523949069	0.358435917	-0.480233301	0.362571522	-2.45262724	-2.773313218	-1.890928233	-2.729597451	-1.886792628	-0.320685978	0.561699007	-0.276970211	0.565834612	0.882384986	0.043715767	0.88652059	-0.838669218	0.004135605	0.842804823	2.00E-06	0	2.40E-05	0	0	0	0	0	0	0.967881	0	0	0
Q01853 [Transitional endoplasmic reticulum ATPase ...]	-0.999141362	-0.662753274	-0.319337239	0.484315746	0.876990292	-0.885456318	1.435989976	-0.881320714	0.336388088	0.679804123	1.483457108	1.876131654	0.113685044	2.435131339	0.117820649	0.343416035	1.14706902	1.539743566	-0.222703045	2.09874325	-0.21856744	0.803652985	1.196327531	-0.566119079	1.755327216	-0.561983475	0.392674547	-1.369772064	0.951674231	-1.365636459	-1.762446611	0.558999684	-1.758311006	2.321446295	0.004135605	-2.31731069	0.029234	0.000433	0.000303	1.00E-06	0	0.004909	1.00E-06	0.004438	0.08411	0.007388	1.20E-05	1.00E-06	0.68635
Q02053;P31254 [Ubiquitin-like modifier-activating enzyme 1 ...]	-0.71751358	0.163009047	-0.735654418	-0.618934145	-0.424904559	0.085746953	0.464786705	0.089882558	0.880522627	-0.018140839	0.098579435	0.29260902	0.803260533	1.182300284	0.807396138	-0.898663466	-0.781943192	-0.587913606	-0.077262094	0.301777658	-0.073126489	0.116720274	0.310749859	0.821401372	1.200441123	0.825536977	0.194029585	0.704681098	1.083720849	0.708816703	0.510651513	0.889691264	0.514787117	0.379039752	0.004135605	-0.374904147	0.003056	3.00E-06	0.002239	0.201377	0.779211	1.00E-05	0	8.00E-06	0	1	0.479017	0.002638	0
Q02257 [Junction plakoglobin ...]	-0.994711427	-1.617158979	-0.97362859	0.218824185	-0.993985463	-0.829739247	-0.97928562	1.590133632	-0.622447552	0.021082837	1.213535612	0.000725964	0.16497218	0.015425807	2.584845059	0.643530389	1.835983164	0.623173516	0.787419732	0.637873359	3.207292611	1.192452775	-0.020356873	0.143889343	-0.00565703	2.563762222	-1.212809648	-1.048563432	-1.198109805	1.371309447	0.164246216	0.014699843	2.584119095	-0.149546373	2.419872879	2.569419252	0.148347	0.051528	0.16175	0.789633	0.143266	0.202785	0.135793	0.955723	0.719489	1	0.483697	1	0.999999
Q03734;P29621 [Serine protease inhibitor A3M ...]	1.101073309	2.095988003	1.085756585	-1.94756191	-1.873486635	-1.772187924	-1.760797097	-3.993444729	0.994914694	-0.015316724	-3.048635219	-2.974559944	-2.873261233	-2.861870406	-5.094518038	-1.010231418	-4.043549913	-3.969474638	-3.868175927	-3.8567851	-6.089432732	-3.033318495	-2.95924322	-2.85794451	-2.846553682	-5.079201315	0.074075275	0.175373986	0.186764813	-2.045882819	0.101298711	0.112689538	-2.119958095	0.011390827	-2.221256805	-2.232647632	0.00104	0.04184	0.002452	0	0	5.00E-06	0	0	5.00E-05	1	0	0	2.30E-05
Q05144;A0A2R8VHH0 [Ras-related C3 botulinum toxin substrate 2 ...]	2.354233703	4.088176256	1.615730224	2.015425228	0.066925749	-0.327980359	-0.703371345	-0.323844754	1.733942553	-0.73850348	-0.338808476	-2.287307955	-2.682214062	-3.057605049	-2.678078457	-2.472446032	-2.072751028	-4.021250507	-4.416156615	-4.791547601	-4.41202101	0.399695004	-1.548804475	-1.943710582	-2.319101569	-1.939574977	-1.948499479	-2.343405586	-2.718796573	-2.339269981	-0.394906107	-0.770297094	-0.390770502	-0.375390987	0.004135605	0.379526591	0.000267	2.00E-06	0.013836	0.001344	0.061922	0.006244	0.001249	0.006038	0.000479	0.035242	0.362217	2.20E-05	6.00E-06
Q05816 [Fatty acid-binding protein, epidermal ...]	-1.346570179	-2.03911555	-1.3106365	-1.311119504	2.125135091	-1.127960419	1.279185206	-1.128058817	-0.692545371	0.035933679	0.035450675	3.47170527	0.21860976	2.625755385	0.218511362	0.72847905	0.727996046	4.164250641	0.911155131	3.318300756	0.911056733	-0.000483004	3.435771591	0.18267608	2.589821706	0.182577682	3.436254595	0.183159085	2.59030471	0.183060687	-3.25309551	-0.845949885	-3.253193908	2.407145625	-9.84E-05	-2.407244023	2.00E-06	0	0.001177	0.000808	0	0	0	0	0	0.000355	0.000398	0	0
Q06770 [Corticosteroid-binding globulin ...]	0.32020653	0.590375392	-0.745722293	-0.835942306	-1.03062589	-0.292447681	-0.769468368	-0.265188139	0.270168862	-1.065928823	-1.156148835	-1.35083242	-0.612654211	-1.089674898	-0.585394669	-1.336097685	-1.426317698	-1.621001282	-0.882823073	-1.359843761	-0.855563532	-0.090220012	-0.284903597	0.453274612	-0.023746075	0.480534154	-0.194683585	0.543494625	0.066473937	0.570754166	0.738178209	0.261157522	0.765437751	-0.477020687	0.027259542	0.504280229	0.800198	0.992649	0.113217	0.087521	0.053712	0.303902	0.089484	0.313013	0.877183	0.277427	0.231505	0.152514	0.618284
Q06890;E9PUU2;E9PXG5;E9Q8Y5;E9Q9B8;E9Q2G2 [Clusterin;Clusterin beta chain;Clusterin alpha cha ...]	1.038952802	-1.718084428	1.655855232	1.409107713	0.310521856	2.435968389	-2.096613587	1.876587801	-2.757037229	0.616902431	0.370154912	-0.728430945	1.397015587	-3.135566388	0.837635	3.37393966	3.127192141	2.028606284	4.154052816	-0.378529159	3.594672229	-0.246747519	-1.345333376	0.780113156	-3.752468819	0.220732569	-1.098585857	1.026860675	-3.5057213	0.467480088	2.125446532	-2.407135443	1.566065945	-4.532581975	-0.559380587	3.973201388	0.002021	0	0.145275	0.02368	4.00E-05	0.333008	0	0.582154	5.00E-06	0.039816	0.225148	0.017807	0.000471
Q07456 [Protein AMBP;Alpha-1-microglobulin;Inter-alpha-try ...]	1.006507861	-0.713072704	0.418143117	-1.383432368	-1.725041003	-0.395837245	-1.234506463	-0.39170164	-1.719580564	-0.588364744	-2.389940228	-2.731548864	-1.402345106	-2.241014324	-1.398209501	1.131215821	-0.670359664	-1.011968299	0.317235459	-0.521433759	0.321371064	-1.801575484	-2.14318412	-0.813980362	-1.65264958	-0.809844757	-0.341608635	0.987595123	0.148925905	0.991730728	1.329203758	0.49053454	1.333339363	-0.838669218	0.004135605	0.842804823	0.000112	0	1.00E-06	0	0	0	0	0	0	4.00E-06	0	0	0
Q08093;D3Z7R6;A0A0G2JDV8;Q9DAW9 [Calponin-2 ...]	0.294799157	-1.193269251	-0.126799934	0.886027007	-0.63460232	0.694601438	-0.14406778	0.698737043	-1.488068409	-0.421599091	0.59122785	-0.929401477	0.399802281	-0.438866937	0.403937886	1.066469318	2.079296258	0.558666931	1.887870689	1.049201471	1.892006294	1.012826941	-0.507802387	0.821401372	-0.017267846	0.825536977	-1.520629327	-0.191425569	-1.030094787	-0.187289964	1.329203758	0.49053454	1.333339363	-0.838669218	0.004135605	0.842804823	0.165402	1.10E-05	0.002239	1.10E-05	1.00E-06	1.00E-05	0.001086	8.00E-06	1.20E-05	0.001157	0.00038	3.00E-06	0.001616
Q19LI2 [Alpha-1B-glycoprotein ...]	-1.843490932	-2.779933526	1.048780281	-1.473101694	-1.81471033	-0.485506571	-1.32417579	-0.481370967	-0.936442593	2.892271214	0.370389238	0.028780603	1.357984361	0.519315143	1.362119966	3.828713807	1.306831831	0.965223196	2.294426954	1.455757736	2.298562559	-2.521881976	-2.863490611	-1.534286853	-2.372956071	-1.530151248	-0.341608635	0.987595123	0.148925905	0.991730728	1.329203758	0.49053454	1.333339363	-0.838669218	0.004135605	0.842804823	0	0	0.012685	0	0	0	0	0	4.00E-06	0	1.00E-05	0.631897	0
Q3KQQ2;P04939;Q80YX8;P11590 [Major urinary protein 3 ...]	3.64089876	-4.405864828	1.065117235	-0.107525183	2.211736497	3.020504896	-2.405747786	2.139912587	-8.046763589	-2.575781525	-3.748423944	-1.429162263	-0.620393864	-6.046646546	-1.500986173	5.470982064	4.298339645	6.617601325	7.426369725	2.000117043	6.545777416	-1.172642419	1.146619262	1.955387661	-3.470865021	1.074795352	2.31926168	3.12803008	-2.298222602	2.247437771	0.808768399	-4.617484283	-0.07182391	-5.426252682	-0.880592309	4.545660373	2.00E-06	0	0.000367	0	0.151007	0.002311	0	0.052871	0	1.00E-06	0	0	0.000683
Q3SXK0;P38575 [Uroplakin-2 ...]	-3.603633684	-5.814431724	-2.252324489	-3.256358704	-2.089111224	-2.975645463	1.040805031	-2.971509858	-2.21079804	1.351309195	0.34727498	1.51452246	0.627988221	4.644438715	0.632123826	3.562107235	2.55807302	3.725320499	2.838786261	6.855236755	2.842921866	-1.004034215	0.163213265	-0.723320974	3.29312952	-0.719185369	1.16724748	0.280713241	4.297163735	0.284848846	-0.886534239	3.129916255	-0.882398634	4.016450494	0.004135605	-4.012314889	0	0	0.000292	2.00E-05	0.008835	3.00E-06	1.00E-06	3.00E-06	1.00E-06	7.50E-05	0.309297	0.000912	0.009084
Q3THE2;Q6ZWQ9;Q9CQ19 [Myosin regulatory light chain 12B;Myosin regulator ...]	0.413578407	0.594473154	1.082949707	0.882179608	1.297878037	-1.25343437	0.133954606	-1.253532768	0.180894747	0.6693713	0.468601201	0.884299629	-1.667012777	-0.279623802	-1.667111175	0.488476553	0.287706454	0.703404883	-1.847907524	-0.460518548	-1.848005922	-0.200770099	0.21492833	-2.336384077	-0.948995102	-2.336482475	0.415698428	-2.135613978	-0.748225003	-2.135712376	-2.551312407	-1.163923431	-2.551410805	1.387388976	-9.84E-05	-1.387487374	0.049827	0.025647	0.000765	0.001768	0.000134	0.000921	0.345488	0.000837	0.412464	6.50E-05	0.000842	6.00E-06	0
Q3THW5;P0C0S6;Q8R029;Q3UA95 [Histone H2A.V;Histone H2A.Z;Histone H2A ...]	2.801501801	3.776033745	1.77176791	1.667681211	1.755951023	-1.715065498	2.358210485	1.829399818	0.974531944	-1.029733891	-1.13382059	-1.045550778	-4.516567299	-0.443291315	-0.972101983	-2.004265835	-2.108352535	-2.020082722	-5.491099243	-1.41782326	-1.946633927	-0.104086699	-0.015816887	-3.486833408	0.586442576	0.057631908	0.088269812	-3.382746709	0.690529275	0.161718607	-3.471016521	0.602259463	0.073448795	4.073275984	3.544465316	-0.528810668	0	0	4.00E-06	2.00E-06	1.00E-06	0.336849	1.00E-06	1.00E-06	6.90E-05	5.30E-05	2.80E-05	4.00E-05	1.00E-06
Q3TLP8;P63001;P60764;A2AC13;A0A2R8VH29;A0A1B0GSL4;G3UZM2;D3Z3L1;F2Z463;D3YX61;Q8R527;Q9ER71 [Ras-related C3 botulinum toxin substrate 1;Ras-rel ...]	1.153434889	0.991730454	0.473239087	0.924519404	-0.339393904	-0.327980359	-0.703371345	-0.323844754	-0.161704435	-0.680195803	-0.228915486	-1.492828793	-1.481415248	-1.856806235	-1.477279643	-0.518491368	-0.06721105	-1.331124358	-1.319710813	-1.695101799	-1.315575208	0.451280317	-0.81263299	-0.801219445	-1.176610432	-0.79708384	-1.263913308	-1.252499762	-1.627890749	-1.248364158	0.011413545	-0.363977441	0.01554915	-0.375390987	0.004135605	0.379526591	0.228398	0.564814	0.493353	0.484695	0.001061	0.001274	0.000387	0.001213	0.843199	0.062379	0.656534	0.000771	0.000843
Q3TML0;Q922R8 [Protein disulfide-isomerase A6 ...]	-0.024573056	0.876530883	-0.003490218	-0.003823267	-0.023847091	0.140399124	-0.009147249	0.142063095	0.901103939	0.021082837	0.020749789	0.000725964	0.16497218	0.015425807	0.166636151	-0.880021101	-0.88035415	-0.900377975	-0.736131759	-0.885678132	-0.734467788	-0.000333049	-0.020356873	0.143889343	-0.00565703	0.145553314	-0.020023824	0.144222391	-0.005323982	0.145886362	0.164246216	0.014699843	0.165910187	-0.149546373	0.001663971	0.151210344	1	0.58827	1	1	1	1	1	1	0.566675	1	1	1	0.999999
Q3TN85;Q8CAP3;P54726;P54728 [UV excision repair protein RAD23 homolog A;UV exci ...]	-0.021018641	-0.645796846	-0.006167799	1.987950452	0.924608379	0.088174495	-0.012646028	0.100301014	-0.624778206	0.014850842	2.008969093	0.945627019	0.109193135	0.008372613	0.121319655	0.639629048	2.633747299	1.570405225	0.733971341	0.633150819	0.746097861	1.994118251	0.930776178	0.094342293	-0.006478229	0.106468813	-1.063342074	-1.899775958	-2.00059648	-1.887649438	-0.836433884	-0.937254406	-0.824307364	-0.100820522	0.01212652	0.112947042	1	0.705798	1	0.144017	0.621876	1	1	1	0.719489	1	0.143691	0.569712	0.999999
Q3TYL7;Q9QYJ3 [DnaJ homolog subfamily B member 1 ...]	0	0	0	0	1.452005851	0.055555556	0	0.069444444	0	0	0	1.452005851	0.055555556	0	0.069444444	0	0	1.452005851	0.055555556	0	0.069444444	0	1.452005851	0.055555556	0	0.069444444	1.452005851	0.055555556	0	0.069444444	-1.396450295	-1.452005851	-1.382561406	-0.055555556	0.013888889	0.069444444	1	1	1	1	1	1	1	1	1	1	1	1	0.999999
Q3U2S8 [Voltage-gated hydrogen channel 1 ...]	0	1.867306036	0	0	0	0.055555556	0	0.069444444	1.867306036	0	0	0	0.055555556	0	0.069444444	-1.867306036	-1.867306036	-1.867306036	-1.81175048	-1.867306036	-1.797861591	0	0	0.055555556	0	0.069444444	0	0.055555556	0	0.069444444	0.055555556	0	0.069444444	-0.055555556	0.013888889	0.069444444	1	1	1	1	1	1	1	1	1	1	1	1	0.999999
Q3U367;Q9JLJ2 [4-trimethylaminobutyraldehyde dehydrogenase ...]	-0.351376772	-1.410283294	-0.048441736	-0.138661749	1.358252524	0.404832876	-0.072187811	0.432092418	-1.058906522	0.302935036	0.212715024	1.709629296	0.756209648	0.279188961	0.78346919	1.361841558	1.271621545	2.768535818	1.81511617	1.338095483	1.842375712	-0.090220012	1.40669426	0.453274612	-0.023746075	0.480534154	1.496914273	0.543494625	0.066473937	0.570754166	-0.953419648	-1.430440335	-0.926160106	-0.477020687	0.027259542	0.504280229	0.822881	0.10308	1	1	0.164954	0.959886	1	0.924998	0.267281	0.967881	1	0.067702	0.498448
Q3U3V1;O88947 [Coagulation factor X;Factor X light chain;Factor X ...]	1.023272142	-2.144339023	1.484862703	-0.86166259	-0.90294882	-0.678503505	-0.873314845	-0.678601904	-3.167611165	0.461590561	-1.884934732	-1.926220963	-1.701775648	-1.896586987	-1.701874046	3.629201726	1.282676433	1.241390203	1.465835517	1.271024178	1.465737119	-2.346525293	-2.387811524	-2.163366209	-2.358177548	-2.163464607	-0.04128623	0.183159085	-0.011652255	0.183060687	0.224445315	0.029633975	0.224346917	-0.19481134	-9.84E-05	0.194712941	0.103809	0	7.40E-05	0	0	0	0	0	0	0	0	0	0
Q3U5Q7 [UMP-CMP kinase 2, mitochondrial ...]	-0.024573056	0.907851119	-0.003490218	-0.003823267	-0.023847091	0.140399124	-0.009147249	0.142063095	0.932424175	0.021082837	0.020749789	0.000725964	0.16497218	0.015425807	0.166636151	-0.911341338	-0.911674386	-0.931698211	-0.767451995	-0.916998368	-0.765788024	-0.000333049	-0.020356873	0.143889343	-0.00565703	0.145553314	-0.020023824	0.144222391	-0.005323982	0.145886362	0.164246216	0.014699843	0.165910187	-0.149546373	0.001663971	0.151210344	1	0.573691	1	1	1	1	1	1	0.551702	1	1	1	0.999999
Q3U9G9;A0A0A6YWS3;A0A0A6YXW3;A0A0A6YXT6;A0A0A6YW01;A0A0A6YY12 [Lamin-B receptor ...]	0.461893305	0.994625036	-0.126799934	0.759902338	-0.63460232	0.694601438	-0.14406778	0.698737043	0.532731731	-0.588693239	0.298009033	-1.096495625	0.232708133	-0.605961085	0.236843738	-1.12142497	-0.234722698	-1.629227356	-0.300023598	-1.138692816	-0.295887993	0.886702271	-0.507802387	0.821401372	-0.017267846	0.825536977	-1.394504658	-0.0653009	-0.903970118	-0.061165295	1.329203758	0.49053454	1.333339363	-0.838669218	0.004135605	0.842804823	0.001814	0	0.002239	0.005401	1.00E-06	1.00E-05	0.001086	8.00E-06	4.30E-05	2.30E-05	0.15515	0	0.012033
Q3UA72;Q9CPW4 [Actin-related protein 2/3 complex subunit 5 ...]	0.944088485	2.206618829	0.902946508	1.541036392	0.726857535	-2.572497181	0.693851498	-2.558608292	1.262530344	-0.041141977	0.596947907	-0.217230951	-3.516585666	-0.250236987	-3.502696777	-1.303672321	-0.665582437	-1.479761295	-4.77911601	-1.512767331	-4.765227121	0.638089884	-0.176088974	-3.475443689	-0.20909501	-3.4615548	-0.814178857	-4.113533573	-0.847184894	-4.099644684	-3.299354715	-0.033006036	-3.285465826	3.266348679	0.013888889	-3.25245979	0.000267	2.00E-06	0.00038	2.10E-05	0.00061	7.60E-05	0.000568	6.90E-05	3.00E-06	0.989718	0.000818	0.195539	0
Q3UDR8 [Protein YIPF3;Protein YIPF3, N-terminally processe ...]	1.175188782	-1.354328147	1.632897596	2.010230984	-0.086480387	1.260772937	-1.354328147	4.284182742	-2.529516929	0.457708814	0.835042202	-1.261669169	0.085584155	-2.529516929	3.10899396	2.987225743	3.364559131	1.26784776	2.615101084	0	5.638510889	0.377333388	-1.719377983	-0.372124659	-2.987225743	2.651285146	-2.096711371	-0.749458047	-3.364559131	2.273951758	1.347253324	-1.26784776	4.370663129	-2.615101084	3.023409805	5.638510889	0.575147	0	0.295442	0.011904	0.000876	1	0	0	0	0.001871	2.80E-05	0.000546	0.999999
Q3UDS7;A0A1L1SSF2;Q8VDL4 [ADP-dependent glucokinase ...]	1.064555516	1.722594086	-0.126799934	1.313848	-0.63460232	0.694601438	-0.14406778	0.698737043	0.658038569	-1.19135545	0.249292483	-1.699157837	-0.369954078	-1.208623297	-0.365818474	-1.849394019	-0.408746086	-2.357196406	-1.027992648	-1.866661866	-1.023857043	1.440647934	-0.507802387	0.821401372	-0.017267846	0.825536977	-1.94845032	-0.619246562	-1.45791578	-0.615110957	1.329203758	0.49053454	1.333339363	-0.838669218	0.004135605	0.842804823	0	0	0.002239	4.00E-06	1.00E-06	1.00E-05	0.001086	8.00E-06	4.00E-06	0	0.075423	0	0.000327
Q3UER8;Q8VCM7 [Fibrinogen gamma chain ...]	3.322097452	2.515955173	0.791688428	1.872217575	-0.730379926	1.399998154	-3.070007814	-2.227202991	-0.806142279	-2.530409023	-1.449879876	-4.052477377	-1.922099298	-6.392105265	-5.549300443	-1.724266745	-0.643737598	-3.246335099	-1.115957019	-5.585962987	-4.743158164	1.080529147	-1.522068354	0.608309726	-3.861696242	-3.018891419	-2.602597501	-0.472219421	-4.942225389	-4.099420566	2.13037808	-2.339627888	-1.496823065	-4.470005968	-3.627201145	0.842804823	0.00042	1.00E-06	0	0	0	0	0	0	0	0	0	0	0
Q3UP87 [Neutrophil elastase ...]	4.580948705	3.57289043	0.808256691	3.098713881	1.233832026	0.694601438	-0.14406778	0.698737043	-1.008058276	-3.772692014	-1.482234824	-3.347116679	-3.886347267	-4.725016485	-3.882211662	-2.764633738	-0.474176548	-2.339058404	-2.878288992	-3.71695821	-2.874153387	2.29045719	0.425575335	-0.113655253	-0.952324471	-0.109519648	-1.864881855	-2.404112443	-3.242781661	-2.399976838	-0.539230588	-1.377899806	-0.535094983	-0.838669218	0.004135605	0.842804823	0	2.00E-06	0.045205	0	7.60E-05	0.008977	0.128154	0.008152	0.015792	1.00E-06	3.40E-05	0	0
Q3UV17;CON__Q7RTS7;CON__Q32MB2 [Keratin, type II cytoskeletal 2 oral ...]	-0.448181019	-3.481347373	0.382358044	1.066667801	0.984734158	1.087232315	-0.47826354	1.592333839	-3.033166354	0.830539063	1.51484882	1.432915176	1.535413334	-0.030082521	2.040514858	3.863705417	4.548015174	4.46608153	4.568579688	3.003083833	5.073681211	0.684309757	0.602376113	0.704874271	-0.860621584	1.209975794	-0.081933644	0.020564514	-1.544931341	0.525666037	0.102498158	-1.462997697	0.607599681	-1.565495855	0.505101524	2.070597379	7.20E-05	0	0.747045	0.001838	0.004339	0.001445	5.40E-05	1.50E-05	0	0.000158	2.00E-06	2.00E-06	1.00E-06
Q3UVK0;G8JL46;F6TQS9 [Endoplasmic reticulum metallopeptidase 1 ...]	-0.827416859	-0.832574583	-0.806334022	-0.80666707	-0.826690895	-0.662444679	0.793696554	-0.660780708	-0.005157724	0.021082837	0.020749789	0.000725964	0.16497218	1.621113414	0.166636151	0.026240561	0.025907513	0.005883688	0.170129904	1.626271138	0.171793875	-0.000333049	-0.020356873	0.143889343	1.600030576	0.145553314	-0.020023824	0.144222391	1.600363625	0.145886362	0.164246216	1.620387449	0.165910187	1.456141234	0.001663971	-1.454477263	1	1	1	1	1	1	0.234491	1	1	1	1	1	0.999999
Q3V3R8;A0A0J9YUI1;A0A0J9YU07;P61087 [Ubiquitin-conjugating enzyme E2 K ...]	0	0	0	0	2.454469176	0.055555556	0	0.069444444	0	0	0	2.454469176	0.055555556	0	0.069444444	0	0	2.454469176	0.055555556	0	0.069444444	0	2.454469176	0.055555556	0	0.069444444	2.454469176	0.055555556	0	0.069444444	-2.39891362	-2.454469176	-2.385024731	-0.055555556	0.013888889	0.069444444	1	1	1	1	1	1	1	1	1	1	1	1	0.999999
Q4U4S6 [Xin actin-binding repeat-containing protein 2 ...]	0	1.354251419	0	0	0	0.055555556	0	1.027300913	1.354251419	0	0	0	0.055555556	0	1.027300913	-1.354251419	-1.354251419	-1.354251419	-1.298695863	-1.354251419	-0.326950506	0	0	0.055555556	0	1.027300913	0	0.055555556	0	1.027300913	0.055555556	0	1.027300913	-0.055555556	0.971745357	1.027300913	1	1	1	1	1	1	1	1	1	1	1	1	0.999999
Q504P4;P63017;D3Z5E2 [Heat shock cognate 71 kDa protein ...]	-1.911441752	0.400629138	-1.558382193	-1.733728247	-0.070995623	-2.468323556	1.202282678	-2.106665914	2.312070891	0.35305956	0.177713505	1.840446129	-0.556881804	3.11372443	-0.195224162	-1.959011331	-2.134357386	-0.471624762	-2.868952695	0.80165354	-2.507295053	-0.175346055	1.48738657	-0.909941364	2.760664871	-0.548283722	1.662732624	-0.734595309	2.936010926	-0.372937667	-2.397327933	1.273278301	-2.035670291	3.670606235	0.361657642	-3.308948593	0.098941	0.001538	0.540597	0.227223	0.011905	0.044839	8.00E-05	0.189132	0.000129	0.506718	0.878218	0.000576	0.431763
Q542I8;P11835;M0QWA7;D3YYP8;D3Z1S4 [Integrin beta;Integrin beta-2 ...]	2.27840497	3.25749708	0.581513441	2.368276859	-0.63460232	0.694601438	-0.14406778	0.698737043	0.979092109	-1.696891529	0.089871889	-2.913007291	-1.583803532	-2.42247275	-1.579667927	-2.675983638	-0.88922022	-3.8920994	-2.562895642	-3.40156486	-2.558760037	1.786763418	-1.216115762	0.113087997	-0.725581221	0.117223601	-3.00287918	-1.673675421	-2.512344639	-1.669539817	1.329203758	0.49053454	1.333339363	-0.838669218	0.004135605	0.842804823	0	0	1.10E-05	0	0	1.00E-06	3.60E-05	0	0	0	0.216405	0	0
Q543K9;P23492;A0A2I3BQH2;A0A2I3BS22;Q9D8C9 [Purine nucleoside phosphorylase ...]	0.488567851	2.382857137	-0.126799934	2.241806412	0.139467462	0.694601438	-0.14406778	0.698737043	1.894289286	-0.615367785	1.753238561	-0.349100389	0.206033587	-0.632635631	0.210169192	-2.509657071	-0.141050726	-2.243389675	-1.688255699	-2.526924918	-1.684120095	2.368606345	0.266267396	0.821401372	-0.017267846	0.825536977	-2.102338949	-1.547204974	-2.385874192	-1.543069369	0.555133976	-0.283535243	0.55926958	-0.838669218	0.004135605	0.842804823	0.036795	0	0.036991	0	1	0.000525	0.022549	0.000447	0	0.001479	1.00E-06	0.175343	0.227115
Q5EBP8;P49312 [Heterogeneous nuclear ribonucleoprotein A1;Heterog ...]	0	1.63217604	0	0	0	0.055555556	0	0.069444444	1.63217604	0	0	0	0.055555556	0	0.069444444	-1.63217604	-1.63217604	-1.63217604	-1.576620484	-1.63217604	-1.562731596	0	0	0.055555556	0	0.069444444	0	0.055555556	0	0.069444444	0.055555556	0	0.069444444	-0.055555556	0.013888889	0.069444444	1	1	1	1	1	1	1	1	1	1	1	1	0.999999
Q5FW60 [Major urinary protein 20 ...]	3.289017992	-5.290731924	3.806794781	3.868562254	3.350975077	4.285878325	-3.290614881	-2.447810058	-8.579749916	0.517776789	0.579544262	0.061957085	0.996860333	-6.579632873	-5.73682805	9.097526704	9.159294177	8.641707	9.576610249	2.000117043	2.842921866	0.061767473	-0.455819704	0.479083545	-7.097409662	-6.254604839	-0.517587177	0.417316072	-7.159177135	-6.316372312	0.934903249	-6.641589958	-5.798785135	-7.576493206	-6.733688383	0.842804823	1	0	2.20E-05	1.00E-06	0.275107	0	0	0	0	0.002317	0.000828	0.778057	1.30E-05
Q5ND35;Q61247;E9PXE0 [Alpha-2-antiplasmin ...]	1.357242765	-0.455970064	-1.48600965	-1.652203401	-1.993812037	-0.664608279	-1.503277497	-0.660472674	-1.813212829	-2.843252415	-3.009446166	-3.351054802	-2.021851043	-2.860520262	-2.017715439	-1.030039586	-1.196233337	-1.537841973	-0.208638215	-1.047307433	-0.20450261	-0.166193751	-0.507802387	0.821401372	-0.017267846	0.825536977	-0.341608635	0.987595123	0.148925905	0.991730728	1.329203758	0.49053454	1.333339363	-0.838669218	0.004135605	0.842804823	0.194347	0	0	0	0	0	0	0	0	0	0	0	0
Q5RKN9;P47753;A0A0G2JE27 [F-actin-capping protein subunit alpha-1 ...]	-0.457888221	0.953542536	-0.126799934	-0.292993685	-0.63460232	0.694601438	-0.14406778	0.698737043	1.411430756	0.331088287	0.164894536	-0.176714099	1.152489659	0.313820441	1.156625264	-1.080342469	-1.24653622	-1.588144856	-0.258941098	-1.097610316	-0.254805493	-0.166193751	-0.507802387	0.821401372	-0.017267846	0.825536977	-0.341608635	0.987595123	0.148925905	0.991730728	1.329203758	0.49053454	1.333339363	-0.838669218	0.004135605	0.842804823	0	0	0.000201	3.00E-06	0	1.00E-06	6.30E-05	0	0	2.50E-05	0.003514	0.002042	0
Q5SQG5;P67778 [Prohibitin ...]	-0.759303062	-1.038714222	-0.738220225	-0.738553274	-0.232126285	-0.594330882	0.725582758	-0.592666911	-0.279411159	0.021082837	0.020749789	0.527176777	0.16497218	1.48488582	0.166636151	0.300493997	0.300160948	0.806587936	0.444383339	1.76429698	0.44604731	-0.000333049	0.50609394	0.143889343	1.463802983	0.145553314	0.506426988	0.144222391	1.464136032	0.145886362	-0.362204597	0.957709043	-0.360540626	1.31991364	0.001663971	-1.318249669	1	0.959086	1	1	0.885774	1	0.295751	1	0.970379	1	1	0.841121	0.999999
Q5SUA5 [Unconventional myosin-Ig ...]	0	1.48766881	0	0	0	0.055555556	0	0.069444444	1.48766881	0	0	0	0.055555556	0	0.069444444	-1.48766881	-1.48766881	-1.48766881	-1.432113254	-1.48766881	-1.418224365	0	0	0.055555556	0	0.069444444	0	0.055555556	0	0.069444444	0.055555556	0	0.069444444	-0.055555556	0.013888889	0.069444444	1	1	1	1	1	1	1	1	1	1	1	1	0.999999
Q5SVG5;Q5SVG4;O35643;H3BKM0;H3BIY9;Q9DBG3 [AP-1 complex subunit beta-1;AP complex subunit bet ...]	-0.357597847	0.239828408	-0.088016215	-0.164472958	-0.352684239	0.462786625	-0.093673245	0.43956429	0.597426255	0.269581633	0.19312489	0.004913609	0.820384473	0.263924602	0.797162138	-0.327844623	-0.404301366	-0.592512647	0.222958217	-0.333501653	0.199735882	-0.076456743	-0.264668024	0.55080284	-0.00565703	0.527580505	-0.188211281	0.627259583	0.070799713	0.604037248	0.815470864	0.259010994	0.792248529	-0.55645987	-0.023222335	0.533237535	0.763326	1	1	1	0.741576	0.905032	1	0.924998	0.551702	0.967881	1	1	0.399969
Q5SW88;P62821;Q5SW87;A0A494BA38;A0A494BBL7;A0A494B945;Q9D1G1;Q5SW86 [Ras-related protein Rab-1A;Ras-related protein Rab ...]	-0.467124856	0.412628933	-0.284474224	0.113122077	-1.240246305	-1.15932496	-0.065168376	-1.155189355	0.879753789	0.182650632	0.580246934	-0.773121449	-0.692200104	0.40195648	-0.688064499	-0.697103157	-0.299506855	-1.652875238	-1.571953893	-0.477797309	-1.567818288	0.397596302	-0.955772081	-0.874850736	0.219305848	-0.870715131	-1.353368383	-1.272447037	-0.178290453	-1.268311433	0.080921345	1.17507793	0.08505695	1.094156584	0.004135605	-1.090020979	0.002832	0.026782	0.032997	1	0.000847	7.00E-06	0.945788	6.00E-06	7.90E-05	0.263176	0.001727	0.021296	0.000482
Q5SXR6;Q68FD5;F6Z1R4 [Clathrin heavy chain;Clathrin heavy chain 1 ...]	-0.171887233	0.221356017	-0.564202564	-0.730396315	-0.027288183	0.257198808	0.29333485	0.261334413	0.39324325	-0.392315331	-0.558509082	0.14459905	0.429086041	0.465222083	0.433221645	-0.785558581	-0.951752332	-0.248644199	0.035842791	0.071978833	0.039978396	-0.166193751	0.536914381	0.821401372	0.857537414	0.825536977	0.703108133	0.987595123	1.023731165	0.991730728	0.28448699	0.320623033	0.288622595	0.036136043	0.004135605	-0.032000438	0.450753	0.000713	0.036991	0.002433	0.035226	0.000525	0.018557	0.000447	0.008396	0.009014	0.00102	0.322849	0.00542
Q5XJY5 [Coatomer subunit delta ...]	-0.024573056	-0.202532878	-0.003490218	-0.003823267	1.686041	0.140399124	-0.009147249	0.142063095	-0.177959822	0.021082837	0.020749789	1.710614056	0.16497218	0.015425807	0.166636151	0.199042659	0.19870961	1.888573878	0.342932002	0.193385629	0.344595973	-0.000333049	1.689531219	0.143889343	-0.00565703	0.145553314	1.689864267	0.144222391	-0.005323982	0.145886362	-1.545641876	-1.695188249	-1.543977905	-0.149546373	0.001663971	0.151210344	1	1	1	1	0.219126	1	1	1	1	1	1	0.215758	0.999999
Q60590 [Alpha-1-acid glycoprotein 1 ...]	-0.101069269	0.530578858	-1.24099408	-1.407187831	-1.748796466	-0.419592708	-1.258261926	-0.415457103	0.631648127	-1.13992481	-1.306118561	-1.647727197	-0.318523439	-1.157192657	-0.314387834	-1.771572937	-1.937766689	-2.279375324	-0.950171566	-1.788840784	-0.946035961	-0.166193751	-0.507802387	0.821401372	-0.017267846	0.825536977	-0.341608635	0.987595123	0.148925905	0.991730728	1.329203758	0.49053454	1.333339363	-0.838669218	0.004135605	0.842804823	3.00E-05	0.003863	0	0	0	0	0	0	0.01468	2.60E-05	1.10E-05	1.00E-06	0.06775
Q60692 [Proteasome subunit beta type-6 ...]	-1.184858039	-0.645457802	-0.915276407	0.227575943	-0.354599227	-0.364473567	0.733586947	-0.387695902	0.539400238	0.269581633	1.412433983	0.830258812	0.820384473	1.918444986	0.797162138	-0.269818605	0.873033745	0.290858575	0.280984235	1.379044749	0.2577619	1.14285235	0.56067718	0.55080284	1.648863353	0.527580505	-0.58217517	-0.59204951	0.506011004	-0.615271845	-0.00987434	1.088186174	-0.033096675	1.098060514	-0.023222335	-1.121282848	0.889327	1	1	0.487481	0.922349	0.986025	0.199778	1	0.719489	1	0.243652	0.540636	0.58104
Q60817;P70670 [Nascent polypeptide-associated complex subunit alp ...]	-0.045591697	0.548011253	-0.009658017	-0.010141021	1.175644148	0.173018063	-0.021793276	0.172919665	0.593602949	0.035933679	0.035450675	1.221235845	0.21860976	0.02379842	0.218511362	-0.55766927	-0.558152274	0.627632896	-0.374993189	-0.569804529	-0.375091588	-0.000483004	1.185302166	0.18267608	-0.012135259	0.182577682	1.18578517	0.183159085	-0.011652255	0.183060687	-1.002626085	-1.197437425	-1.002724483	-0.19481134	-9.84E-05	0.194712941	2.00E-06	0	0.001177	0.000808	0	0	7.50E-05	0	0	0.000355	0.000398	0	0
Q60864 [Stress-induced-phosphoprotein 1 ...]	-0.663382923	-0.556203111	-0.126799934	-0.292993685	-0.346749926	0.694601438	-0.14406778	0.698737043	0.107179812	0.536582989	0.370389238	0.316632997	1.357984361	0.519315143	1.362119966	0.429403177	0.263209426	0.209453184	1.250804549	0.412135331	1.254940154	-0.166193751	-0.219949993	0.821401372	-0.017267846	0.825536977	-0.053756242	0.987595123	0.148925905	0.991730728	1.041351364	0.202682146	1.045486969	-0.838669218	0.004135605	0.842804823	0	0	0.000374	7.00E-06	0.000185	1.00E-06	0.000127	1.00E-06	0.105156	1.00E-06	2.80E-05	0.004098	0
Q60932 [Voltage-dependent anion-selective channel protein ...]	2.57044469	1.676912102	0	0	0	0.055555556	0	0.069444444	-0.893532588	-2.57044469	-2.57044469	-2.57044469	-2.514889134	-2.57044469	-2.501000245	-1.676912102	-1.676912102	-1.676912102	-1.621356546	-1.676912102	-1.607467657	0	0	0.055555556	0	0.069444444	0	0.055555556	0	0.069444444	0.055555556	0	0.069444444	-0.055555556	0.013888889	0.069444444	1	1	1	1	1	1	1	1	1	1	1	1	0.999999
Q61029;Q61033 [Lamina-associated polypeptide 2, isoforms beta/del ...]	-0.357597847	0.610624131	-0.088016215	-0.164472958	-0.352684239	0.462786625	-0.093673245	0.43956429	0.968221979	0.269581633	0.19312489	0.004913609	0.820384473	0.263924602	0.797162138	-0.698640346	-0.775097089	-0.96330837	-0.147837506	-0.704297376	-0.171059841	-0.076456743	-0.264668024	0.55080284	-0.00565703	0.527580505	-0.188211281	0.627259583	0.070799713	0.604037248	0.815470864	0.259010994	0.792248529	-0.55645987	-0.023222335	0.533237535	0.763326	0.626305	1	1	0.741576	0.905032	1	0.924998	0.279193	0.967881	1	1	0.399969
Q61093;E9Q7S3;E9Q802 [Cytochrome b-245 heavy chain ...]	0.432913211	1.72419997	-0.126799934	-0.014114044	-0.63460232	0.694601438	-0.14406778	0.698737043	1.291286759	-0.559713144	-0.447027255	-1.067515531	0.261688227	-0.576980991	0.265823832	-1.850999904	-1.738314014	-2.35880229	-1.029598532	-1.86826775	-1.025462927	0.112685889	-0.507802387	0.821401372	-0.017267846	0.825536977	-0.620488276	0.708715482	-0.129953736	0.712851087	1.329203758	0.49053454	1.333339363	-0.838669218	0.004135605	0.842804823	0.000156	0	0.000374	0.108728	0	1.00E-06	0.000127	1.00E-06	0	1.00E-06	0.000441	0	0.000404
Q61129;A0A0G2JF07 [Complement factor I;Complement factor I heavy chai ...]	0.583721693	-1.027074353	0.594040978	-1.223929829	-1.565538464	-0.236334706	-1.075003924	-0.232199101	-1.610796046	0.010319285	-1.807651522	-2.149260157	-0.820056399	-1.658725617	-0.815920794	1.621115331	-0.196855475	-0.538464111	0.790739647	-0.047929571	0.794875252	-1.817970806	-2.159579442	-0.830375683	-1.669044901	-0.826240078	-0.341608635	0.987595123	0.148925905	0.991730728	1.329203758	0.49053454	1.333339363	-0.838669218	0.004135605	0.842804823	0.001144	0	0.001718	0	0	1.00E-06	0	1.00E-06	0	1	0	0	2.50E-05
Q61171;D3Z4A4 [Peroxiredoxin-2 ...]	-0.943864107	-1.691659002	0.111150856	2.857098233	1.297171146	2.641598625	0.70305473	-0.971612187	-0.747794896	1.055014962	3.80096234	2.241035253	3.585462731	1.646918837	-0.02774808	1.802809858	4.548757236	2.988830149	4.333257627	2.394713732	0.720046815	2.745947378	1.186020291	2.530447769	0.591903874	-1.082763042	-1.559927087	-0.215499609	-2.154043504	-3.82871042	1.344427478	-0.594116417	-2.268783333	-1.938543895	-3.613210811	-1.674666917	0.93053	0.145135	0.271188	0.000173	0.013282	0.000282	0.038965	0.924998	0.26072	0.103739	7.40E-05	0.00559	9.10E-05
Q61176 [Arginase-1 ...]	-0.663382923	3.864016951	-0.126799934	-0.292993685	-0.63460232	0.694601438	-0.14406778	0.698737043	4.527399874	0.536582989	0.370389238	0.028780603	1.357984361	0.519315143	1.362119966	-3.990816885	-4.157010636	-4.498619272	-3.169415513	-4.008084732	-3.165279909	-0.166193751	-0.507802387	0.821401372	-0.017267846	0.825536977	-0.341608635	0.987595123	0.148925905	0.991730728	1.329203758	0.49053454	1.333339363	-0.838669218	0.004135605	0.842804823	0	0	0.000164	2.00E-06	0	1.00E-06	5.00E-05	0	0	1.00E-06	1.00E-05	0.631897	0
Q61233;A0A1C7CYV0;B1AX58;Q99K51;D3YZ25;D3YVW8;D3Z7D9;D3Z311;Q3V0K9 [Plastin-2 ...]	3.370798694	5.306680874	1.917740099	3.586318285	0.724271423	0.694601438	-0.14406778	1.709266137	1.93588218	-1.453058595	0.215519591	-2.646527271	-2.676197256	-3.514866474	-1.661532557	-3.388940775	-1.720362589	-4.582409451	-4.612079436	-5.450748654	-3.597414737	1.668578187	-1.193468676	-1.223138661	-2.061807879	-0.208473962	-2.862046862	-2.891716847	-3.730386065	-1.877052148	-0.029669985	-0.868339203	0.984994714	-0.838669218	1.014664699	1.853333917	0	0	0	0	0.000636	0.001026	0.03541	7.50E-05	0	1.00E-06	0.303058	0	0
Q61335 [B-cell receptor-associated protein 31 ...]	-0.45762134	0.044168263	-0.45762134	2.288792697	1.035124854	-0.402065784	-0.45762134	-0.388176895	0.501789602	0	2.746414036	1.492746194	0.055555556	0	0.069444444	-0.501789602	2.244624434	0.990956591	-0.446234047	-0.501789602	-0.432345158	2.746414036	1.492746194	0.055555556	0	0.069444444	-1.253667843	-2.690858481	-2.746414036	-2.676969592	-1.437190638	-1.492746194	-1.423301749	-0.055555556	0.013888889	0.069444444	0.000351	0.073263	0.00055	2.00E-06	0.05867	0.000561	0.000308	0.000567	0.003299	1	0	4.90E-05	0.587105
Q61362;D3Z2Z5;D3YXU4 [Chitinase-3-like protein 1 ...]	-0.357597847	-0.096460372	-0.088016215	0.151052338	-0.352684239	0.462786625	-0.093673245	0.43956429	0.261137476	0.269581633	0.508650185	0.004913609	0.820384473	0.263924602	0.797162138	0.008444157	0.247512709	-0.256223867	0.559246997	0.002787127	0.536024662	0.239068552	-0.264668024	0.55080284	-0.00565703	0.527580505	-0.503736576	0.311734287	-0.244725583	0.288511953	0.815470864	0.259010994	0.792248529	-0.55645987	-0.023222335	0.533237535	0.766499	0.967315	1	1	0.741576	0.905032	1	0.924998	0.868261	0.967881	0.710159	1	0.407339
Q61598;A0A1Y7VL99;A0A1Y7VLG4 [Rab GDP dissociation inhibitor beta ...]	0.533479047	0.904046067	-0.187460157	0.120609425	1.284850612	0.30553164	0.245002018	0.309667245	0.37056702	-0.720939205	-0.412869623	0.751371564	-0.227947408	-0.288477029	-0.223811803	-1.091506224	-0.783436642	0.380804545	-0.598514427	-0.659044049	-0.594378822	0.308069582	1.472310769	0.492991797	0.432462176	0.497127402	1.164241187	0.184922215	0.124392594	0.18905782	-0.979318972	-1.039848593	-0.975183367	-0.060529621	0.004135605	0.064665226	4.00E-05	1.00E-06	1	0.130782	0	0.000525	0.033401	0.000447	0.006519	0.000442	0.091658	4.90E-05	0.073731
Q61599;D3YWL7;A0A0N4SVH4 [Rho GDP-dissociation inhibitor 2 ...]	3.039359412	2.664770896	-0.048441736	2.613995035	2.406803545	0.404832876	-0.072187811	0.432092418	-0.374588516	-3.087801149	-0.425364378	-0.632555867	-2.634526536	-3.111547224	-2.607266995	-2.713212632	-0.050775861	-0.257967351	-2.25993802	-2.736958707	-2.232678478	2.662436771	2.455245281	0.453274612	-0.023746075	0.480534154	-0.20719149	-2.209162159	-2.686182846	-2.181902617	-2.001970669	-2.478991357	-1.974711128	-0.477020687	0.027259542	0.504280229	0.004256	0.008207	1	0.010331	0.015227	0.959886	1	0.924998	0.77187	0.003425	0.832642	0.563752	0.008734
Q61646 [Haptoglobin;Haptoglobin alpha chain;Haptoglobin be ...]	2.135099491	2.489081975	2.16844837	3.568498887	0.428633134	3.572528539	-1.901855088	0.610986588	0.353982484	0.033348879	1.433399396	-1.706466357	1.437429049	-4.036954579	-1.524112902	-0.320633605	1.079416912	-2.060448841	1.083446564	-4.390937063	-1.878095387	1.400050517	-1.739815237	1.404080169	-4.070303458	-1.557461782	-3.139865753	0.004029652	-5.470353975	-2.957512299	3.143895406	-2.330488222	0.182353455	-5.474383627	-2.961541951	2.512841676	0.860879	0.312349	0.883619	0.00673	0.012591	0.006809	2.10E-05	0.102726	0.598145	1	0.016642	0.005798	0.015549
Q61696;P17879 [Heat shock 70 kDa protein 1A;Heat shock 70 kDa pro ...]	-1.985953093	-3.466754993	0.319482815	-1.615563855	0.118013726	-0.627968732	1.17850239	-0.623833127	-1.4808019	2.305435908	0.370389238	2.10396682	1.357984361	3.164455484	1.362119966	3.786237808	1.851191138	3.584768719	2.838786261	4.645257383	2.842921866	-1.93504667	-0.201469088	-0.947451547	0.859019576	-0.943315942	1.733577582	0.987595123	2.794066245	0.991730728	-0.745982459	1.060488664	-0.741846854	1.806471123	0.004135605	-1.802335518	0	0	4.50E-05	7.00E-06	0	1.00E-06	0	1.00E-06	0	1.00E-06	2.80E-05	0	0
Q61792;A2A6G9;A2A6H0;A2A6G7;A2A6G8;A2A6G0;A2A6G6 [LIM and SH3 domain protein 1 ...]	-0.41071054	-0.969861448	-1.15703096	-1.323224712	0.671725857	-0.335629589	0.886163247	-0.331493984	-0.559150908	-0.746320421	-0.912514172	1.082436397	0.075080951	1.296873786	0.079216556	-0.187169513	-0.353363264	1.641587305	0.634231859	1.856024695	0.638367464	-0.166193751	1.828756817	0.821401372	2.043194207	0.825536977	1.994950568	0.987595123	2.209387958	0.991730728	-1.007355446	0.21443739	-1.003219841	1.221792835	0.004135605	-1.217657231	0.006846	0.590734	0.036991	0.002433	8.00E-06	0.000525	0.000212	0.000447	0.002987	0.000373	9.70E-05	0.000352	0.8008
Q61838;D3YUI3;Q6GQT1 [Alpha-2-macroglobulin;Alpha-2-macroglobulin 165 kD ...]	2.202405742	4.419422815	3.57782626	1.48219057	-0.441132702	2.92241335	-2.46082604	0.228994111	2.217017073	1.375420518	-0.720215172	-2.643538444	0.720007608	-4.663231783	-1.973411631	-0.841596555	-2.937232245	-4.860555517	-1.497009465	-6.880248856	-4.190428704	-2.09563569	-4.018958962	-0.655412909	-6.0386523	-3.348832149	-1.923323272	1.440222781	-3.94301661	-1.253196458	3.363546052	-2.019693338	0.670126813	-5.383239391	-2.693419239	2.689820152	0.669625	0.000232	0.012091	0.021197	1.20E-05	0.308191	0	0.003149	0.000107	0.003252	0.08338	2.80E-05	0.083474
Q61878 [Bone marrow proteoglycan;Eosinophil granule major ...]	2.754607627	2.115405341	-0.009658017	-0.010141021	-0.051427252	0.173018063	-0.021793276	0.172919665	-0.639202286	-2.764265645	-2.764748649	-2.806034879	-2.581589564	-2.776400904	-2.581687962	-2.125063358	-2.125546363	-2.166832593	-1.942387278	-2.137198617	-1.942485676	-0.000483004	-0.041769234	0.18267608	-0.012135259	0.182577682	-0.04128623	0.183159085	-0.011652255	0.183060687	0.224445315	0.029633975	0.224346917	-0.19481134	-9.84E-05	0.194712941	0	0	0.001496	0.001045	1.00E-06	0	0.000102	0	0	0	0	0	0
Q62093 [Serine/arginine-rich splicing factor 2 ...]	-0.002865471	0.054941133	-0.996270716	-0.99675372	0.033275828	-0.813594636	0.964819423	-0.813693034	0.057806604	-0.993405245	-0.99388825	0.036141299	-0.810729165	0.967684893	-0.810827563	-1.051211849	-1.051694853	-0.021665305	-0.868535769	0.90987829	-0.868634167	-0.000483004	1.029546544	0.18267608	1.961090139	0.182577682	1.030029549	0.183159085	1.961573143	0.183060687	-0.846870464	0.931543594	-0.846968862	1.778414058	-9.84E-05	-1.778512456	0	0	0.001496	0.001045	0	0	0	0	0.009696	0	0	0.147723	0
Q62266;Q62267 [Cornifin-A ...]	-3.849505691	-7.528470294	-1.134192299	-0.362516894	3.126166426	-1.749251475	1.711438719	-2.227567598	-3.678964602	2.715313393	3.486988798	6.975672117	2.100254216	5.56094441	1.621938093	6.394277995	7.1659534	10.65463672	5.779218818	9.239909012	5.300902695	0.771675405	4.260358724	-0.615059177	2.845631018	-1.0933753	3.488683319	-1.386734582	2.073955613	-1.865050705	-4.875417901	-1.414727707	-5.353734024	3.460690194	-0.478316123	-3.939006317	0.03405	4.70E-05	0.758554	0.177357	0.000207	1	0.002217	0.826921	0.001569	0.010408	0.002481	1.40E-05	0.042578
Q62465 [Synaptic vesicle membrane protein VAT-1 homolog ...]	-0.441623912	-1.200083584	-0.405690232	-0.406173236	0.927577684	-0.223014152	0.374238939	-0.22311255	-0.758459672	0.035933679	0.035450675	1.369201595	0.21860976	0.81586285	0.218511362	0.794393351	0.793910347	2.127661267	0.977069432	1.574322522	0.976971034	-0.000483004	1.333267916	0.18267608	0.779929171	0.182577682	1.33375092	0.183159085	0.780412175	0.183060687	-1.150591836	-0.553338745	-1.150690234	0.597253091	-9.84E-05	-0.597351489	2.00E-06	0	0.001177	0.000808	0	0	0	0	0	0.000355	0.000398	0	0
Q64339 [Ubiquitin-like protein ISG15 ...]	0	0	0	2.836546635	0	0.055555556	0	0.069444444	0	0	2.836546635	0	0.055555556	0	0.069444444	0	2.836546635	0	0.055555556	0	0.069444444	2.836546635	0	0.055555556	0	0.069444444	-2.836546635	-2.78099108	-2.836546635	-2.767102191	0.055555556	0	0.069444444	-0.055555556	0.013888889	0.069444444	1	1	1	1	1	1	1	1	1	1	1	1	0.999999
Q64726 [Zinc-alpha-2-glycoprotein ...]	0.70876622	0.903162687	-0.006167799	-0.006317754	-0.02758016	0.088174495	-0.012646028	0.100301014	0.194396467	-0.714934018	-0.715083974	-0.73634638	-0.620591725	-0.721412247	-0.608465205	-0.909330486	-0.909480441	-0.930742847	-0.814988192	-0.915808714	-0.802861673	-0.000149955	-0.021412361	0.094342293	-0.006478229	0.106468813	-0.021262406	0.094492249	-0.006328273	0.106618769	0.115754655	0.014934133	0.127881175	-0.100820522	0.01212652	0.112947042	0.766499	0.575206	1	1	1	1	1	1	1	0.759505	0.757805	0.682655	0.806832
Q64727 [Vinculin ...]	0.717910104	0.221014746	-0.126799934	1.199375072	0.038078605	0.694601438	-0.14406778	0.698737043	-0.496895358	-0.844710037	0.481464968	-0.679831499	-0.023308666	-0.861977884	-0.019173061	-0.34781468	0.978360326	-0.182936141	0.473586692	-0.365082526	0.477722297	1.326175005	0.164878538	0.821401372	-0.017267846	0.825536977	-1.161296467	-0.504773634	-1.343442852	-0.500638029	0.656522833	-0.182146385	0.660658438	-0.838669218	0.004135605	0.842804823	1.00E-06	0.224744	0.000541	4.00E-06	0.066829	2.00E-06	0.000192	1.00E-06	6.00E-06	0	0.001215	0	0.874614
Q6A0A2 [La-related protein 4B ...]	-0.003928251	0.439171197	0	0.227066005	0	0.055555556	0	0.069444444	0.443099448	0.003928251	0.230994256	0.003928251	0.059483807	0.003928251	0.073372696	-0.439171197	-0.212105193	-0.439171197	-0.383615642	-0.439171197	-0.369726753	0.227066005	0	0.055555556	0	0.069444444	-0.227066005	-0.171510449	-0.227066005	-0.15762156	0.055555556	0	0.069444444	-0.055555556	0.013888889	0.069444444	0.795387	1.00E-06	1	1.30E-05	1	0.002826	1	0.000254	1.00E-06	0.805146	1.40E-05	0.731815	0.001822
Q6BCL1 [PML-RARA-regulated adapter molecule 1 ...]	0	0.961866979	0	0	0	0.055555556	0	0.069444444	0.961866979	0	0	0	0.055555556	0	0.069444444	-0.961866979	-0.961866979	-0.961866979	-0.906311423	-0.961866979	-0.892422534	0	0	0.055555556	0	0.069444444	0	0.055555556	0	0.069444444	0.055555556	0	0.069444444	-0.055555556	0.013888889	0.069444444	1	1	1	1	1	1	1	1	1	1	1	1	0.999999
Q6GT24;D3Z0Y2;O08709;Q8BG37 [Peroxiredoxin-6 ...]	-0.528161366	0.94594981	-0.126799934	1.188084077	-0.63460232	0.694601438	-0.14406778	0.698737043	1.474111176	0.401361432	1.716245443	-0.106440954	1.222762804	0.384093586	1.226898409	-1.072749744	0.242134267	-1.58055213	-0.251348372	-1.09001759	-0.247212767	1.31488401	-0.507802387	0.821401372	-0.017267846	0.825536977	-1.822686397	-0.493482639	-1.332151857	-0.489347034	1.329203758	0.49053454	1.333339363	-0.838669218	0.004135605	0.842804823	8.00E-06	5.00E-06	0.002239	0	1.00E-06	1.00E-05	0.001086	8.00E-06	0	0.000417	0	0.23981	0
Q6P069 [Sorcin ...]	0.305475424	0.677482589	-0.126799934	0.527838171	0.553366902	0.694601438	-0.14406778	0.698737043	0.372007165	-0.432275358	0.222362747	0.247891478	0.389126014	-0.449543204	0.393261618	-0.804282523	-0.149644418	-0.124115687	0.017118849	-0.821550369	0.021254454	0.654638105	0.680166836	0.821401372	-0.017267846	0.825536977	0.025528731	0.166763267	-0.671905951	0.170898872	0.141234536	-0.697434683	0.14537014	-0.838669218	0.004135605	0.842804823	0.221384	0.000551	0.036991	0.107431	0.007752	0.000525	0.022549	0.000447	0.007264	0.003175	0.402322	0.090816	0.005922
Q6S9I0;Q6S9I2;Q6S9I3;A0A338P699;A0A338P7D0;E0CYI5;CON__P01045-1;CON__Q2KJ62;CON__P01044-1 [ ...]	1.581317261	-0.443550878	3.186813417	-0.362996642	-2.083232127	1.719590683	-2.749557083	-1.90675226	-2.024868139	1.605496156	-1.944313903	-3.664549388	0.138273422	-4.330874344	-3.488069521	3.630364295	0.080554236	-1.639681249	2.163141561	-2.306006205	-1.463201382	-3.54981006	-5.270045544	-1.467222734	-5.9363705	-5.093565677	-1.720235485	2.082587326	-2.38656044	-1.543755618	3.80282281	-0.666324956	0.176479867	-4.469147766	-3.626342943	0.842804823	0.00086	0	0.137116	1.00E-06	0	0.003202	0	0	1.40E-05	9.70E-05	2.80E-05	4.00E-06	0.815703
Q6ZQ38 [Cullin-associated NEDD8-dissociated protein 1 ...]	-0.653552827	-0.65303805	-0.617619147	-0.618102151	0.677294612	-0.434943067	0.586167854	-0.435041465	0.000514777	0.035933679	0.035450675	1.330847439	0.21860976	1.23972068	0.218511362	0.035418902	0.034935898	1.330332662	0.218094983	1.239205903	0.217996585	-0.000483004	1.294913759	0.18267608	1.203787001	0.182577682	1.295396763	0.183159085	1.204270005	0.183060687	-1.112237679	-0.091126758	-1.112336077	1.021110921	-9.84E-05	-1.021209319	2.00E-06	2.00E-06	0.001177	0.000808	0	0	0	0	1	0.000355	0.000398	0	0
Q6ZQM8 [UDP-glucuronosyltransferase 1-7C ...]	-1.788903641	-4.360823124	-1.933722156	-2.509631986	-1.081052076	-1.522036864	2.072570522	-1.517901259	-2.571919484	-0.144818515	-0.720728346	0.707851565	0.266866777	3.861474162	0.271002382	2.427100969	1.851191138	3.279771049	2.838786261	6.433393646	2.842921866	-0.575909831	0.85267008	0.411685292	4.006292677	0.415820897	1.428579911	0.987595123	4.582202508	0.991730728	-0.440984788	3.153622597	-0.436849183	3.594607385	0.004135605	-3.59047178	0.027533	0	0.546688	0.002433	4.10E-05	0.000525	0	0.000447	0	0.482756	8.70E-05	0.000566	0.038171
Q6ZWN5;F7CJS8;D3YWH9;Q9CXW7 [40S ribosomal protein S9 ...]	-0.024573056	0.947661668	-0.003490218	-0.003823267	0.83196502	0.140399124	-0.009147249	0.142063095	0.972234724	0.021082837	0.020749789	0.856538076	0.16497218	0.015425807	0.166636151	-0.951151887	-0.951484935	-0.115696648	-0.807262544	-0.956808917	-0.805598573	-0.000333049	0.835455239	0.143889343	-0.00565703	0.145553314	0.835788288	0.144222391	-0.005323982	0.145886362	-0.691565896	-0.841112269	-0.689901925	-0.149546373	0.001663971	0.151210344	1	0.549246	1	1	0.675868	1	1	1	0.52783	1	1	0.618748	0.999999
Q6ZWV7 [60S ribosomal protein L35 ...]	-1.017695974	-0.569797382	-0.04183419	1.8130899	1.997316772	-0.852723794	-0.099287896	-0.851059823	0.447898591	0.975861784	2.830785874	3.015012746	0.16497218	0.918408077	0.166636151	0.527963192	2.382887282	2.567114154	-0.282926411	0.470509486	-0.28126244	1.85492409	2.039150962	-0.810889604	-0.057453706	-0.809225633	0.184226872	-2.665813694	-1.912377796	-2.664149723	-2.850040566	-2.096604668	-2.848376595	0.753435897	0.001663971	-0.751771926	0.56009	0.738208	1	0.272942	0.208476	0.697814	1	0.693354	0.851549	0.619469	0.051305	0.037001	0.999999
Q6ZWZ7;Q9CPR4;B2RY53 [60S ribosomal protein L17 ...]	-0.021018641	1.271593463	-0.006167799	-0.006317754	1.774781829	0.088174495	-0.012646028	0.100301014	1.292612104	0.014850842	0.014700887	1.79580047	0.109193135	0.008372613	0.121319655	-1.277761262	-1.277911217	0.503188366	-1.183418968	-1.28423949	-1.171292448	-0.000149955	1.780949628	0.094342293	-0.006478229	0.106468813	1.781099583	0.094492249	-0.006328273	0.106618769	-1.686607335	-1.787427857	-1.674480815	-0.100820522	0.01212652	0.112947042	1	0.376739	1	1	0.191342	1	1	1	0.36743	1	1	0.190109	0.999999
Q76MZ3;G3UWL2 [Serine/threonine-protein phosphatase 2A 65 kDa reg ...]	-1.271653927	-0.524194096	-0.735070938	-0.335276549	0.349333581	0.086330434	0.464203224	0.090466038	0.747459832	0.536582989	0.936377378	1.620987509	1.357984361	1.735857152	1.362119966	-0.210876843	0.188917546	0.873527677	0.610524529	0.98839732	0.614660134	0.399794389	1.084404519	0.821401372	1.199274163	0.825536977	0.684610131	0.421606983	0.799479774	0.425742588	-0.263003148	0.114869643	-0.258867543	0.377872791	0.004135605	-0.373737186	1.00E-06	0.544436	0.002239	0.484695	0	1.00E-05	1.00E-05	8.00E-06	3.00E-06	1.50E-05	6.40E-05	0	0
Q7TSV4;A0A0G2JG04 [Phosphoglucomutase-2 ...]	-1.140442289	-2.197883949	-0.870860656	-0.947317399	0.265866185	-0.320057816	0.689171196	-0.343280151	-1.05744166	0.269581633	0.19312489	1.406308474	0.820384473	1.829613485	0.797162138	1.327023293	1.25056655	2.463750134	1.877826133	2.887055145	1.854603798	-0.076456743	1.136726841	0.55080284	1.560031852	0.527580505	1.213183584	0.627259583	1.636488595	0.604037248	-0.585924001	0.423305011	-0.609146336	1.009229012	-0.023222335	-1.032451347	0.730067	0.052259	1	1	0.232182	0.889496	0.072274	0.915838	0.182777	0.967881	1	0.076786	0.355455
Q80W54 [CAAX prenyl protease 1 homolog ...]	0	0	0	2.574053885	0	0.055555556	0	0.069444444	0	0	2.574053885	0	0.055555556	0	0.069444444	0	2.574053885	0	0.055555556	0	0.069444444	2.574053885	0	0.055555556	0	0.069444444	-2.574053885	-2.518498329	-2.574053885	-2.50460944	0.055555556	0	0.069444444	-0.055555556	0.013888889	0.069444444	1	1	1	1	1	1	1	1	1	1	1	1	0.999999
Q80X90 [Filamin-B ...]	-1.454911767	-0.513632656	-0.69004495	-0.212218174	0.975245379	-0.581246429	1.131780087	-0.577110824	0.941279111	0.764866817	1.242693594	2.430157146	0.873665338	2.586691854	0.877800943	-0.176412294	0.301414482	1.488878035	-0.067613773	1.645412743	-0.063478168	0.477826777	1.665290329	0.108798521	1.821825037	0.112934126	1.187463553	-0.369028256	1.343998261	-0.364892651	-1.556491808	0.156534708	-1.552356203	1.713026516	0.004135605	-1.708890911	0.642971	0.253653	0.537125	0.061741	0.000521	0.307884	0.000305	0.295892	0.078131	0.167872	0.016546	0.000199	0.077735
Q80YQ1;P35441;CON__Q28194 [Thrombospondin-1 ...]	-0.663382923	0.966530475	-0.126799934	0.482101723	-0.63460232	0.694601438	-0.14406778	0.698737043	1.629913398	0.536582989	1.145484646	0.028780603	1.357984361	0.519315143	1.362119966	-1.093330408	-0.484428752	-1.601132795	-0.271929037	-1.110598255	-0.267793432	0.608901656	-0.507802387	0.821401372	-0.017267846	0.825536977	-1.116704043	0.212499715	-0.626169503	0.21663532	1.329203758	0.49053454	1.333339363	-0.838669218	0.004135605	0.842804823	0	0	3.20E-05	3.00E-06	0	0	8.00E-06	0	0	0	0	0.503657	0
Q80ZS7;Q9D0M5;P63168 [Dynein light chain 2, cytoplasmic;Dynein light cha ...]	0	1.40990925	0	0	0	0.055555556	0	0.069444444	1.40990925	0	0	0	0.055555556	0	0.069444444	-1.40990925	-1.40990925	-1.40990925	-1.354353694	-1.40990925	-1.340464806	0	0	0.055555556	0	0.069444444	0	0.055555556	0	0.069444444	0.055555556	0	0.069444444	-0.055555556	0.013888889	0.069444444	1	1	1	1	1	1	1	1	1	1	1	1	0.999999
Q82YW5 [ ...]	-0.351376772	-1.730011921	1.61850697	-0.138661749	-0.333345333	0.404832876	-0.072187811	0.432092418	-1.378635148	1.969883742	0.212715024	0.018031439	0.756209648	0.279188961	0.78346919	3.34851889	1.591350172	1.396666587	2.134844797	1.657824109	2.162104338	-1.757168718	-1.951852303	-1.213674094	-1.690694781	-1.186414552	-0.194683585	0.543494625	0.066473937	0.570754166	0.738178209	0.261157522	0.765437751	-0.477020687	0.027259542	0.504280229	0.751022	0.021773	0.051738	1	0.741576	0.905032	1	0.889912	0.074065	0.01559	1	1	0.388671
Q830Q5 [ ...]	-0.021018641	-0.645796846	3.28672447	1.3341378	-0.02758016	0.088174495	-0.012646028	0.100301014	-0.624778206	3.307743111	1.355156441	-0.006561519	0.109193135	0.008372613	0.121319655	3.932521316	1.979934647	0.618216686	0.733971341	0.633150819	0.746097861	-1.952586669	-3.31430463	-3.198549975	-3.299370497	-3.186423455	-1.361717961	-1.245963306	-1.346783828	-1.233836786	0.115754655	0.014934133	0.127881175	-0.100820522	0.01212652	0.112947042	1	0.705798	0.019675	0.355438	1	1	1	1	0.719489	0.016563	0.33618	1	0.999999
Q830Q6 [ ...]	0	0	4.27821854	0	0	0.055555556	0	0.069444444	0	4.27821854	0	0	0.055555556	0	0.069444444	4.27821854	0	0	0.055555556	0	0.069444444	-4.27821854	-4.27821854	-4.222662985	-4.27821854	-4.208774096	0	0.055555556	0	0.069444444	0.055555556	0	0.069444444	-0.055555556	0.013888889	0.069444444	1	1	0	1	1	1	1	1	1	0	1	1	0.999999
Q830Q8 [ ...]	-1.079307867	-2.043098212	2.892667045	2.035615439	-2.043098212	-0.807282959	-2.043098212	-1.973653768	-0.963790345	3.971974912	3.114923305	-0.963790345	0.272024908	-0.963790345	-0.894345901	4.935765257	4.078713651	0	1.235815253	0	0.069444444	-0.857051606	-4.935765257	-3.699950004	-4.935765257	-4.866320812	-4.078713651	-2.842898398	-4.078713651	-4.009269206	1.235815253	0	0.069444444	-1.235815253	-1.166370809	0.069444444	1.00E-06	0	0.00035	1	0	0	0	0	0.004072	0	1.00E-06	0.004098	0.431321
Q833I8;Q834V5 [ ...]	0	0	4.374625895	0	0	0.055555556	0	0.069444444	0	4.374625895	0	0	0.055555556	0	0.069444444	4.374625895	0	0	0.055555556	0	0.069444444	-4.374625895	-4.374625895	-4.31907034	-4.374625895	-4.305181451	0	0.055555556	0	0.069444444	0.055555556	0	0.069444444	-0.055555556	0.013888889	0.069444444	1	1	1	1	1	1	1	1	1	1	1	1	0.999999
Q833I9 [ ...]	-0.357597847	-1.706990356	2.953382562	0.693447904	-0.352684239	0.462786625	-0.093673245	0.43956429	-1.349392509	3.310980409	1.051045751	0.004913609	0.820384473	0.263924602	0.797162138	4.660372918	2.40043826	1.354306118	2.169776981	1.613317111	2.146554647	-2.259934658	-3.3060668	-2.490595937	-3.047055807	-2.513818271	-1.046132142	-0.230661278	-0.787121149	-0.253883613	0.815470864	0.259010994	0.792248529	-0.55645987	-0.023222335	0.533237535	0.766499	0.038765	0.004319	0.665159	0.741576	0.905032	1	0.924998	0.121086	0.001514	0.295633	1	0.407339
Q834N1 [ ...]	-0.024573056	-0.647020608	3.232248212	-0.003823267	-0.023847091	0.140399124	-0.009147249	0.142063095	-0.622447552	3.256821267	0.020749789	0.000725964	0.16497218	0.015425807	0.166636151	3.879268819	0.643197341	0.623173516	0.787419732	0.637873359	0.789083703	-3.236071479	-3.256095303	-3.091849088	-3.241395461	-3.090185117	-0.020023824	0.144222391	-0.005323982	0.145886362	0.164246216	0.014699843	0.165910187	-0.149546373	0.001663971	0.151210344	1	0.705798	0.023463	1	1	1	1	1	0.719489	0.019802	1	1	0.999999
Q834T3 [ ...]	-0.045591697	-1.292817454	3.359555265	-0.010141021	-0.051427252	0.173018063	-0.021793276	0.172919665	-1.247225758	3.405146961	0.035450675	-0.005835555	0.21860976	0.02379842	0.218511362	4.652372719	1.282676433	1.241390203	1.465835517	1.271024178	1.465737119	-3.369696286	-3.410982516	-3.186537202	-3.381348541	-3.1866356	-0.04128623	0.183159085	-0.011652255	0.183060687	0.224445315	0.029633975	0.224346917	-0.19481134	-9.84E-05	0.194712941	0	0	0	5.40E-05	0	0	4.00E-06	0	0	0	2.80E-05	0.297186	0
Q835J8 [ ...]	0	0	1.709614877	0	0	0.055555556	0	0.069444444	0	1.709614877	0	0	0.055555556	0	0.069444444	1.709614877	0	0	0.055555556	0	0.069444444	-1.709614877	-1.709614877	-1.654059321	-1.709614877	-1.640170432	0	0.055555556	0	0.069444444	0.055555556	0	0.069444444	-0.055555556	0.013888889	0.069444444	1	1	1	1	1	1	1	1	1	1	1	1	0.999999
Q835M1 [ ...]	-0.021018641	-0.645796846	2.9061793	-0.006317754	-0.02758016	0.088174495	-0.012646028	0.100301014	-0.624778206	2.927197941	0.014700887	-0.006561519	0.109193135	0.008372613	0.121319655	3.551976146	0.639479092	0.618216686	0.733971341	0.633150819	0.746097861	-2.912497054	-2.93375946	-2.818004805	-2.918825327	-2.805878285	-0.021262406	0.094492249	-0.006328273	0.106618769	0.115754655	0.014934133	0.127881175	-0.100820522	0.01212652	0.112947042	1	0.705798	0.036991	1	1	1	1	1	0.719489	0.032198	1	1	0.999999
Q835M2 [ ...]	0	0	3.566690247	0	0	0.055555556	0	0.069444444	0	3.566690247	0	0	0.055555556	0	0.069444444	3.566690247	0	0	0.055555556	0	0.069444444	-3.566690247	-3.566690247	-3.511134691	-3.566690247	-3.497245802	0	0.055555556	0	0.069444444	0.055555556	0	0.069444444	-0.055555556	0.013888889	0.069444444	1	1	1	1	1	1	1	1	1	1	1	1	0.999999
Q835M3 [ ...]	-0.987402247	-2.525206138	1.644643007	-0.583312934	-1.283815935	-1.05937062	-1.25418196	-1.059469019	-1.537803891	2.632045253	0.404089312	-0.296413689	-0.071968374	-0.266779713	-0.072066772	4.169849145	1.941893204	1.241390203	1.465835517	1.271024178	1.465737119	-2.227955941	-2.928458942	-2.704013627	-2.898824967	-2.704112025	-0.700503001	-0.476057686	-0.670869026	-0.476156084	0.224445315	0.029633975	0.224346917	-0.19481134	-9.84E-05	0.194712941	0	0	3.00E-06	0	0	0	0	0	0	0	7.60E-05	7.00E-06	0.06775
Q835M4 [ ...]	0	0	3.37757383	0	0	0.055555556	0	0.069444444	0	3.37757383	0	0	0.055555556	0	0.069444444	3.37757383	0	0	0.055555556	0	0.069444444	-3.37757383	-3.37757383	-3.322018275	-3.37757383	-3.308129386	0	0.055555556	0	0.069444444	0.055555556	0	0.069444444	-0.055555556	0.013888889	0.069444444	1	1	1	1	1	1	1	1	1	1	1	1	0.999999
Q835R7 [ ...]	-0.045591697	-1.292817454	2.665126341	0.917066863	-0.051427252	0.173018063	-0.021793276	0.172919665	-1.247225758	2.710718038	0.96265856	-0.005835555	0.21860976	0.02379842	0.218511362	3.957943795	2.209884317	1.241390203	1.465835517	1.271024178	1.465737119	-1.748059478	-2.716553593	-2.492108278	-2.686919617	-2.492206676	-0.968494115	-0.7440488	-0.938860139	-0.744147198	0.224445315	0.029633975	0.224346917	-0.19481134	-9.84E-05	0.194712941	0	0	0	0	0	0	4.00E-06	0	0	0	0	0.297186	0
Q839E8 [ ...]	0	0	0	2.661969972	0	0.055555556	0	0.069444444	0	0	2.661969972	0	0.055555556	0	0.069444444	0	2.661969972	0	0.055555556	0	0.069444444	2.661969972	0	0.055555556	0	0.069444444	-2.661969972	-2.606414416	-2.661969972	-2.592525527	0.055555556	0	0.069444444	-0.055555556	0.013888889	0.069444444	1	1	1	1	1	1	1	1	1	1	1	1	0.999999
Q839F3 [ ...]	-0.045591697	-1.292817454	3.456268174	-0.010141021	-0.051427252	0.173018063	-0.021793276	0.172919665	-1.247225758	3.50185987	0.035450675	-0.005835555	0.21860976	0.02379842	0.218511362	4.749085628	1.282676433	1.241390203	1.465835517	1.271024178	1.465737119	-3.466409195	-3.507695425	-3.283250111	-3.47806145	-3.283348509	-0.04128623	0.183159085	-0.011652255	0.183060687	0.224445315	0.029633975	0.224346917	-0.19481134	-9.84E-05	0.194712941	0	0	0	5.40E-05	0	0	4.00E-06	0	0	0	2.80E-05	0.297186	0
Q839F8 [ ...]	-2.133013014	-2.133013014	1.692726943	-2.133013014	-2.133013014	-2.077457459	-2.133013014	-2.06356857	0	3.825739958	0	0	0.055555556	0	0.069444444	3.825739958	0	0	0.055555556	0	0.069444444	-3.825739958	-3.825739958	-3.770184402	-3.825739958	-3.756295513	0	0.055555556	0	0.069444444	0.055555556	0	0.069444444	-0.055555556	0.013888889	0.069444444	1	1	1	1	1	1	1	1	1	1	1	1	0.999999
Q839G1 [ ...]	0	0	3.08952973	0	0	0.055555556	0	0.069444444	0	3.08952973	0	0	0.055555556	0	0.069444444	3.08952973	0	0	0.055555556	0	0.069444444	-3.08952973	-3.08952973	-3.033974174	-3.08952973	-3.020085286	0	0.055555556	0	0.069444444	0.055555556	0	0.069444444	-0.055555556	0.013888889	0.069444444	1	1	1	1	1	1	1	1	1	1	1	1	0.999999
Q839G5 [ ...]	0	0	3.620855743	3.460669992	0	0.055555556	0	0.069444444	0	3.620855743	3.460669992	0	0.055555556	0	0.069444444	3.620855743	3.460669992	0	0.055555556	0	0.069444444	-0.16018575	-3.620855743	-3.565300187	-3.620855743	-3.551411298	-3.460669992	-3.405114437	-3.460669992	-3.391225548	0.055555556	0	0.069444444	-0.055555556	0.013888889	0.069444444	1	1	1	1	1	1	1	1	1	1	1	1	0.999999
Q839G8 [ ...]	-1.988017272	-2.932161888	2.144267954	1.018345567	-1.95923667	-0.630032911	-1.468702129	-0.625897306	-0.944144616	4.132285227	3.00636284	0.028780603	1.357984361	0.519315143	1.362119966	5.076429842	3.950507455	0.972925218	2.302128977	1.463459759	2.306264582	-1.125922387	-4.103504624	-2.774300866	-3.612970084	-2.770165261	-2.977582237	-1.648378479	-2.487047697	-1.644242874	1.329203758	0.49053454	1.333339363	-0.838669218	0.004135605	0.842804823	0	0	1.00E-06	2.00E-06	0	0	0	0	2.00E-06	0	0	0.554981	0
Q8BFR5;A0A0U1RNQ6 [Elongation factor Tu, mitochondrial ...]	-0.510685125	-1.135463331	-0.495834283	-0.495984238	0.703336377	-0.40149199	0.477020457	-0.38936547	-0.624778206	0.014850842	0.014700887	1.214021502	0.109193135	0.987705582	0.121319655	0.639629048	0.639479092	1.838799707	0.733971341	1.612483787	0.746097861	-0.000149955	1.19917066	0.094342293	0.97285474	0.106468813	1.199320615	0.094492249	0.973004695	0.106618769	-1.104828366	-0.22631592	-1.092701846	0.878512446	0.01212652	-0.866385927	1	0.705798	1	1	0.426544	1	0.569561	1	0.719489	1	1	0.406777	0.999999
Q8BGQ7 [Alanine--tRNA ligase, cytoplasmic ...]	-0.829192116	-2.076417874	-0.793258437	-0.793741441	0.184149515	-0.610582357	0.761807143	-0.610680755	-1.247225758	0.035933679	0.035450675	1.013341632	0.21860976	1.59099926	0.218511362	1.283159437	1.282676433	2.260567389	1.465835517	2.838225017	1.465737119	-0.000483004	0.977407952	0.18267608	1.55506558	0.182577682	0.977890957	0.183159085	1.555548585	0.183060687	-0.794731872	0.577657628	-0.79483027	1.3723895	-9.84E-05	-1.372487898	0	0	0.000122	5.40E-05	0	0	0	0	0	2.20E-05	2.80E-05	0	0
Q8BH61 [Coagulation factor XIII A chain ...]	0.690332085	1.194190011	-0.126799934	-0.292993685	-0.63460232	0.694601438	-0.14406778	0.698737043	0.503857926	-0.817132019	-0.98332577	-1.324934405	0.004269353	-0.834399865	0.008404958	-1.320989945	-1.487183696	-1.828792331	-0.499588573	-1.338257791	-0.495452968	-0.166193751	-0.507802387	0.821401372	-0.017267846	0.825536977	-0.341608635	0.987595123	0.148925905	0.991730728	1.329203758	0.49053454	1.333339363	-0.838669218	0.004135605	0.842804823	8.00E-06	0	0.000164	2.00E-06	0	1.00E-06	5.00E-05	0	1.50E-05	0	0	0	0.999999
Q8BHN3 [Neutral alpha-glucosidase AB ...]	-0.067666466	-0.425248435	-0.088016215	-0.164472958	-0.043687434	0.462786625	-0.093673245	0.43956429	-0.357581969	-0.020349749	-0.096806492	0.023979031	0.530453091	-0.026006779	0.507230756	0.33723222	0.260775477	0.381561	0.88803506	0.33157519	0.864812725	-0.076456743	0.04432878	0.55080284	-0.00565703	0.527580505	0.120785523	0.627259583	0.070799713	0.604037248	0.50647406	-0.049985811	0.483251725	-0.55645987	-0.023222335	0.533237535	1	0.630514	1	1	1	0.905032	1	0.924998	0.768993	1	1	1	0.668972
Q8BJS4 [SUN domain-containing protein 2 ...]	0.881618069	0.593183113	-0.126799934	0.235348429	-0.63460232	0.694601438	-0.14406778	0.698737043	-0.288434957	-1.008418003	-0.646269641	-1.51622039	-0.187016631	-1.025685849	-0.182881027	-0.719983046	-0.357834684	-1.227785433	0.101418326	-0.737250893	0.10555393	0.362148362	-0.507802387	0.821401372	-0.017267846	0.825536977	-0.869950749	0.459253009	-0.379416209	0.463388614	1.329203758	0.49053454	1.333339363	-0.838669218	0.004135605	0.842804823	0	0.000106	0.000374	0.099886	0	1.00E-06	0.000127	1.00E-06	0.004431	0	1.00E-06	0	0.009111
Q8BJY1 [26S proteasome non-ATPase regulatory subunit 5 ...]	-1.47341153	-2.720637287	-1.437477851	-1.437960855	0.814040127	-1.25480177	1.406026557	-1.254900168	-1.247225758	0.035933679	0.035450675	2.287451657	0.21860976	2.879438087	0.218511362	1.283159437	1.282676433	3.534677414	1.465835517	4.126663844	1.465737119	-0.000483004	2.251517977	0.18267608	2.843504408	0.182577682	2.252000982	0.183159085	2.843987412	0.183060687	-2.068841897	0.59198643	-2.068940295	2.660828327	-9.84E-05	-2.660926725	0	0	0.000122	5.40E-05	0	0	0	0	0	2.20E-05	2.80E-05	0	0
Q8BMS1 [Trifunctional enzyme subunit alpha, mitochondrial; ...]	-0.714283767	-0.921593622	-0.658211221	0.46761801	-0.922879245	-0.107408381	0.476521761	-0.130630716	-0.207309855	0.056072546	1.181901776	-0.208595478	0.606875386	1.190805528	0.583653051	0.263382401	1.389211632	-0.001285623	0.814185241	1.398115383	0.790962906	1.12582923	-0.264668024	0.55080284	1.134732982	0.527580505	-1.390497254	-0.57502639	0.008903751	-0.598248725	0.815470864	1.399401005	0.792248529	0.583930142	-0.023222335	-0.607152477	1	0.702875	1	0.303538	0.741576	0.905032	0.367086	0.924998	0.931886	1	0.183456	0.991222	0.58104
Q8BND5 [Sulfhydryl oxidase 1 ...]	0.093422752	-2.033075462	-1.141322378	-1.307516129	-1.649124765	-0.319921006	-1.158590225	-0.315785402	-2.126498214	-1.23474513	-1.400938881	-1.742547517	-0.413343758	-1.252012976	-0.409208154	0.891753084	0.725559333	0.383950697	1.713154456	0.874485237	1.71729006	-0.166193751	-0.507802387	0.821401372	-0.017267846	0.825536977	-0.341608635	0.987595123	0.148925905	0.991730728	1.329203758	0.49053454	1.333339363	-0.838669218	0.004135605	0.842804823	0	0	0	0	0	0	0	0	0	0	0	0	1.90E-05
Q8BP67 [60S ribosomal protein L24 ...]	0	1.57143333	0	0	0	0.055555556	0	0.069444444	1.57143333	0	0	0	0.055555556	0	0.069444444	-1.57143333	-1.57143333	-1.57143333	-1.515877775	-1.57143333	-1.501988886	0	0	0.055555556	0	0.069444444	0	0.055555556	0	0.069444444	0.055555556	0	0.069444444	-0.055555556	0.013888889	0.069444444	1	1	1	1	1	1	1	1	1	1	1	1	0.999999
Q8BPU7 [Engulfment and cell motility protein 1 ...]	0	1.180975805	0	0	0	0.055555556	0	0.069444444	1.180975805	0	0	0	0.055555556	0	0.069444444	-1.180975805	-1.180975805	-1.180975805	-1.125420249	-1.180975805	-1.11153136	0	0	0.055555556	0	0.069444444	0	0.055555556	0	0.069444444	0.055555556	0	0.069444444	-0.055555556	0.013888889	0.069444444	1	1	1	1	1	1	1	1	1	1	1	1	0.999999
Q8BT60;Q9D6C8;A0A0R4J0J1;Q3UYN2;Q1RLL3;Q9Z140;Q8BLR2;Q0VE82;Q9DC53;Q8JZW4 [Copine-3 ...]	0.587686249	1.402564888	-0.126799934	-0.292993685	-0.63460232	0.694601438	-0.14406778	0.698737043	0.814878639	-0.714486183	-0.880679934	-1.22228857	0.106915189	-0.731754029	0.111050793	-1.529364822	-1.695558573	-2.037167208	-0.70796345	-1.546632668	-0.703827845	-0.166193751	-0.507802387	0.821401372	-0.017267846	0.825536977	-0.341608635	0.987595123	0.148925905	0.991730728	1.329203758	0.49053454	1.333339363	-0.838669218	0.004135605	0.842804823	0.00075	0	0.000374	7.00E-06	0	1.00E-06	0.000127	1.00E-06	8.00E-06	2.40E-05	6.00E-06	0	0.378466
Q8C253;P16110 [Galectin;Galectin-3 ...]	-1.182524893	0.140346415	-3.59015637	-2.580847323	-1.388417793	-2.768754999	0.429013736	-2.764619394	1.322871309	-2.407631477	-1.39832243	-0.2058929	-1.586230105	1.611538629	-1.5820945	-3.730502786	-2.721193738	-1.528764208	-2.909101414	0.28866732	-2.904965809	1.009309047	2.201738577	0.821401372	4.019170106	0.825536977	1.19242953	-0.187907675	3.009861059	-0.183772071	-1.380337206	1.817431529	-1.376201601	3.197768734	0.004135605	-3.193633129	5.10E-05	0.000339	0	8.00E-06	5.50E-05	0	0.000214	0	1.00E-06	0	0.000236	0.222111	0
Q8C266;Q9CQD1;P61021;P35278;A2A5F6;A2A5F5 [Ras-related protein Rab-5A;Ras-related protein Rab ...]	2.037735998	1.832360803	0.870928231	2.617869945	0.584789722	0.140399124	-0.009147249	0.142063095	-0.205375195	-1.166807767	0.580133947	-1.452946276	-1.897336874	-2.046883247	-1.895672903	-0.961432572	0.785509142	-1.24757108	-1.691961679	-1.841508052	-1.690297708	1.746941714	-0.286138508	-0.730529107	-0.88007548	-0.728865136	-2.033080223	-2.477470821	-2.627017194	-2.47580685	-0.444390598	-0.593936971	-0.442726627	-0.149546373	0.001663971	0.151210344	0.144696	0.181193	0.734703	0.060462	0.827671	1	1	1	1	0.48591	0.87164	0.313955	0.183334
Q8C2Q7;P70333;O35737 [Heterogeneous nuclear ribonucleoprotein H2;Heterog ...]	0.464287933	1.063262353	-0.009658017	-0.010141021	0.475549954	0.173018063	-0.021793276	0.172919665	0.59897442	-0.47394595	-0.474428954	0.011262021	-0.291269869	-0.486081209	-0.291368267	-1.07292037	-1.073403374	-0.587712399	-0.89024429	-1.085055629	-0.890342688	-0.000483004	0.485207971	0.18267608	-0.012135259	0.182577682	0.485690975	0.183159085	-0.011652255	0.183060687	-0.302531891	-0.49734323	-0.302630289	-0.19481134	-9.84E-05	0.194712941	1.00E-06	0	0.001496	0.001045	1.00E-06	0	0.000102	0	0	1.00E-06	1.00E-06	1	3.40E-05
Q8C845;Q9D8Y0 [EF-hand domain-containing protein D2 ...]	-0.021018641	1.589610144	-0.006167799	-0.006317754	-0.02758016	0.088174495	-0.012646028	0.100301014	1.610628785	0.014850842	0.014700887	-0.006561519	0.109193135	0.008372613	0.121319655	-1.595777943	-1.595927898	-1.617190304	-1.501435649	-1.602256171	-1.489309129	-0.000149955	-0.021412361	0.094342293	-0.006478229	0.106468813	-0.021262406	0.094492249	-0.006328273	0.106618769	0.115754655	0.014934133	0.127881175	-0.100820522	0.01212652	0.112947042	1	0.242892	1	1	1	1	1	1	0.242239	1	1	1	0.999999
Q8CAG6;Q9JHK5 [Pleckstrin ...]	0.480063571	1.65153631	-0.006167799	-0.006317754	-0.02758016	0.088174495	-0.012646028	0.100301014	1.171472739	-0.48623137	-0.486381325	-0.507643731	-0.391889076	-0.492709598	-0.379762556	-1.657704109	-1.657854064	-1.67911647	-1.563361815	-1.664182337	-1.551235295	-0.000149955	-0.021412361	0.094342293	-0.006478229	0.106468813	-0.021262406	0.094492249	-0.006328273	0.106618769	0.115754655	0.014934133	0.127881175	-0.100820522	0.01212652	0.112947042	0.930656	0.222338	1	1	1	1	1	1	0.420511	0.95278	0.943777	0.844627	0.966539
Q8CB12;Q3TR54;Q2KHK6 [Gasdermin-C3;Gasdermin-C4;Gasdermin-C2 ...]	-0.554226568	0.110295818	-0.533143731	-0.53347678	-0.553500604	-0.389254388	0.520506264	-0.387590417	0.664522387	0.021082837	0.020749789	0.000725964	0.16497218	1.074732832	0.166636151	-0.643439549	-0.643772598	-0.663796422	-0.499550207	0.410210446	-0.497886236	-0.000333049	-0.020356873	0.143889343	1.053649995	0.145553314	-0.020023824	0.144222391	1.053983044	0.145886362	0.164246216	1.074006868	0.165910187	0.909760652	0.001663971	-0.908096681	1	0.717777	1	1	1	1	0.52802	1	0.712111	1	1	1	0.999999
Q8CB58;Q8BGJ5;Q922I7;F7C521;F7DCW4;E9QMW9;G8JL74;G3UXA6;Q8BHD7;P17225 [Polypyrimidine tract-binding protein 3;Polypyrimid ...]	0.357179829	0.459405453	-0.424515387	-0.424998391	-0.466284622	-0.241839307	0.393064094	-0.241937705	0.102225623	-0.781695217	-0.782178221	-0.823464451	-0.599019136	0.035884264	-0.599117534	-0.88392084	-0.884403844	-0.925690074	-0.70124476	-0.066341359	-0.701343158	-0.000483004	-0.041769234	0.18267608	0.817579481	0.182577682	-0.04128623	0.183159085	0.818062485	0.183060687	0.224445315	0.859348715	0.224346917	0.6349034	-9.84E-05	-0.635001798	0	0	0.001496	0.001045	1.00E-06	0	0	0	0.009368	0	0	0	0
Q8CBB6;Q8CGP2;Q8CGP1;Q6ZWY9;Q64525;Q64478;Q64475;P10854;P10853;P70696;Q9D2U9;Q8CGP0;Q64524 [Histone H2B;Histone H2B type 1-P;Histone H2B type ...]	2.869022739	3.511130967	2.065809396	3.149333033	1.681704009	-0.144721217	1.119348599	0.928986396	0.642108229	-0.803213343	0.280310294	-1.18731873	-3.013743956	-1.749674139	-1.940036342	-1.445321572	-0.361797934	-1.829426959	-3.655852185	-2.391782368	-2.582144571	1.083523638	-0.384105387	-2.210530613	-0.946460796	-1.136822999	-1.467629024	-3.294054251	-2.029984434	-2.220346637	-1.826425226	-0.56235541	-0.752717613	1.264069817	1.073707614	-0.190362203	0	0	0	0	0	2.00E-06	0	0	4.20E-05	9.00E-06	0.01267	2.70E-05	0
Q8CBG6;Q9CQ60;D3Z4X1;F6X8L5 [6-phosphogluconolactonase ...]	0.401700052	1.268375187	-0.003490218	2.193888756	1.917745792	0.140399124	-0.009147249	0.142063095	0.866675135	-0.405190271	1.792188704	1.516045739	-0.261300928	-0.410847301	-0.259636957	-1.271865405	0.925513569	0.649370605	-1.127976063	-1.277522436	-1.126312092	2.197378975	1.92123601	0.143889343	-0.00565703	0.145553314	-0.276142965	-2.053489632	-2.203036005	-2.051825661	-1.777346667	-1.92689304	-1.775682696	-0.149546373	0.001663971	0.151210344	0.993786	0.378801	1	0.107598	0.157391	1	1	1	0.58961	0.975726	0.199023	0.281797	0.999999
Q8CG29;P70248;G3V011 [Unconventional myosin-If ...]	-0.663382923	0.094074357	-0.126799934	-0.292993685	-0.63460232	0.694601438	-0.14406778	0.698737043	0.75745728	0.536582989	0.370389238	0.028780603	1.357984361	0.519315143	1.362119966	-0.22087429	-0.387068042	-0.728676677	0.600527081	-0.238142137	0.604662686	-0.166193751	-0.507802387	0.821401372	-0.017267846	0.825536977	-0.341608635	0.987595123	0.148925905	0.991730728	1.329203758	0.49053454	1.333339363	-0.838669218	0.004135605	0.842804823	0	0.460191	0.000164	2.00E-06	0	1.00E-06	5.00E-05	0	0	1.00E-06	1.00E-05	0.631897	0
Q8CHP8 [Phosphoglycolate phosphatase ...]	-0.024573056	0.685879786	-0.003490218	-0.003823267	-0.023847091	0.140399124	-0.009147249	0.142063095	0.710452842	0.021082837	0.020749789	0.000725964	0.16497218	0.015425807	0.166636151	-0.689370004	-0.689703053	-0.709726877	-0.545480662	-0.695027035	-0.543816691	-0.000333049	-0.020356873	0.143889343	-0.00565703	0.145553314	-0.020023824	0.144222391	-0.005323982	0.145886362	0.164246216	0.014699843	0.165910187	-0.149546373	0.001663971	0.151210344	1	0.705798	1	1	1	1	1	1	0.689931	1	1	1	0.999999
Q8CI94 [Glycogen phosphorylase, brain form ...]	-0.365973951	-0.075586601	-1.566689913	0.09308105	1.353108285	-0.745288542	1.2958222	-0.741152937	0.290387351	-1.200715962	0.459055001	1.719082236	-0.37931459	1.661796151	-0.375178986	-1.491103313	0.16866765	1.428694886	-0.669701941	1.3714088	-0.665566336	1.659770963	2.919798198	0.821401372	2.862512113	0.825536977	1.260027236	-0.838369591	1.20274115	-0.834233986	-2.098396827	-0.057286085	-2.094261222	2.041110741	0.004135605	-2.036975137	0.000861	0.000155	0.266999	5.90E-05	0	0.020772	0	0.019305	0.242239	0.000158	0.053749	8.00E-06	0.101566
Q8CIH5 [1-phosphatidylinositol 4,5-bisphosphate phosphodie ...]	-0.045591697	0.242441027	-0.009658017	-0.010141021	-0.051427252	0.173018063	-0.021793276	0.172919665	0.288032724	0.035933679	0.035450675	-0.005835555	0.21860976	0.02379842	0.218511362	-0.252099044	-0.252582048	-0.293868279	-0.069422964	-0.264234303	-0.069521362	-0.000483004	-0.041769234	0.18267608	-0.012135259	0.182577682	-0.04128623	0.183159085	-0.011652255	0.183060687	0.224445315	0.029633975	0.224346917	-0.19481134	-9.84E-05	0.194712941	2.00E-06	0	0.001177	0.000808	1.00E-06	0	7.50E-05	0	0	0.000355	0.000398	0.503657	0
Q8CIN4 [Serine/threonine-protein kinase PAK 2;PAK-2p27;PAK ...]	-0.021018641	0.875121489	-0.006167799	-0.006317754	0.53284921	0.088174495	-0.012646028	0.100301014	0.896140129	0.014850842	0.014700887	0.55386785	0.109193135	0.008372613	0.121319655	-0.881289288	-0.881439243	-0.342272279	-0.786946994	-0.887767516	-0.774820474	-0.000149955	0.539017009	0.094342293	-0.006478229	0.106468813	0.539166964	0.094492249	-0.006328273	0.106618769	-0.444674715	-0.545495237	-0.432548195	-0.100820522	0.01212652	0.112947042	1	0.58827	1	1	0.858365	1	1	1	0.566675	1	1	0.812232	0.999999
Q8K0E8 [Fibrinogen beta chain;Fibrinopeptide B;Fibrinogen ...]	3.270488296	0.620530252	2.338804022	2.963800496	1.21503294	2.621873391	-3.371101662	2.115007401	-2.649958044	-0.931684274	-0.3066878	-2.055455355	-0.648614905	-6.641589958	-1.155480894	1.71827377	2.343270244	0.594502689	2.001343139	-3.991631914	1.49447715	0.624996474	-1.123771082	0.283069369	-5.709905684	-0.223796621	-1.748767555	-0.341927105	-6.334902158	-0.848793095	1.40684045	-4.586134603	0.899974461	-5.992975053	-0.506865989	5.486109063	0.791932	2.00E-06	0.00249	0.04951	1.00E-06	0.001803	0	0.000815	3.00E-06	0.00429	0.143114	2.00E-06	0.004602
Q8K1H9 [Odorant-binding protein 2a ...]	2.497259261	0	0	0	0	0.055555556	0	0.069444444	-2.497259261	-2.497259261	-2.497259261	-2.497259261	-2.441703705	-2.497259261	-2.427814816	0	0	0	0.055555556	0	0.069444444	0	0	0.055555556	0	0.069444444	0	0.055555556	0	0.069444444	0.055555556	0	0.069444444	-0.055555556	0.013888889	0.069444444	1	1	1	1	1	1	1	1	1	1	1	1	0.999999
Q8K2B3 [Succinate dehydrogenase [ubiquinone] flavoprotein ...]	-1.472764784	-1.472764784	-1.472764784	-1.472764784	-0.322162711	-1.417209228	1.472764784	-1.403320339	0	0	0	1.150602073	0.055555556	2.945529567	0.069444444	0	0	1.150602073	0.055555556	2.945529567	0.069444444	0	1.150602073	0.055555556	2.945529567	0.069444444	1.150602073	0.055555556	2.945529567	0.069444444	-1.095046517	1.794927495	-1.081157628	2.889974012	0.013888889	-2.876085123	1	1	1	1	1	1	1	1	1	1	1	1	0.999999
Q8QZY1 [Eukaryotic translation initiation factor 3 subunit ...]	-0.024573056	-0.647020608	-0.003490218	-0.003823267	1.479754172	0.140399124	-0.009147249	0.142063095	-0.622447552	0.021082837	0.020749789	1.504327228	0.16497218	0.015425807	0.166636151	0.643530389	0.643197341	2.12677478	0.787419732	0.637873359	0.789083703	-0.000333049	1.483244391	0.143889343	-0.00565703	0.145553314	1.483577439	0.144222391	-0.005323982	0.145886362	-1.339355048	-1.488901421	-1.337691077	-0.149546373	0.001663971	0.151210344	1	0.705798	1	1	0.293014	1	1	1	0.719489	1	1	0.285512	0.999999
Q8R050;F7CE88;Q149F3 [Eukaryotic peptide chain release factor GTP-bindin ...]	0	0	0	0	2.556713429	0.055555556	0	0.069444444	0	0	0	2.556713429	0.055555556	0	0.069444444	0	0	2.556713429	0.055555556	0	0.069444444	0	2.556713429	0.055555556	0	0.069444444	2.556713429	0.055555556	0	0.069444444	-2.501157874	-2.556713429	-2.487268985	-0.055555556	0.013888889	0.069444444	1	1	1	1	1	1	1	1	1	1	1	1	0.999999
Q8R0X7;D6REF7 [Sphingosine-1-phosphate lyase 1 ...]	-0.021018641	0.660850172	-0.006167799	-0.006317754	0.751430972	0.088174495	-0.012646028	0.100301014	0.681868813	0.014850842	0.014700887	0.772449612	0.109193135	0.008372613	0.121319655	-0.667017971	-0.667167926	0.090580799	-0.572675678	-0.6734962	-0.560549158	-0.000149955	0.75759877	0.094342293	-0.006478229	0.106468813	0.757748726	0.094492249	-0.006328273	0.106618769	-0.663256477	-0.764076999	-0.651129957	-0.100820522	0.01212652	0.112947042	1	0.705798	1	1	0.726732	1	1	1	0.698722	1	1	0.660864	0.999999
Q8R2S8 [CD177 antigen ...]	1.289326954	2.29437011	-0.126799934	2.196443377	-0.63460232	0.694601438	-0.14406778	0.698737043	1.005043156	-1.416126888	0.907116423	-1.923929274	-0.594725516	-1.433394734	-0.590589911	-2.421170044	-0.097926734	-2.928972431	-1.599768672	-2.43843789	-1.595633068	2.32324331	-0.507802387	0.821401372	-0.017267846	0.825536977	-2.831045697	-1.501841939	-2.340511157	-1.497706334	1.329203758	0.49053454	1.333339363	-0.838669218	0.004135605	0.842804823	2.00E-06	0	0.002239	0	1.00E-06	1.00E-05	0.001086	8.00E-06	1.30E-05	1.00E-06	5.50E-05	0	0.000318
Q8VCU2;O70362 [Phosphatidylinositol-glycan-specific phospholipase ...]	-0.738454932	-2.909620595	1.022289248	-1.058429458	-1.400038093	-0.070834335	-0.909503553	-0.06669873	-2.171165663	1.760744181	-0.319974525	-0.661583161	0.667620598	-0.17104862	0.671756203	3.931909844	1.851191138	1.509582503	2.838786261	2.000117043	2.842921866	-2.080718706	-2.422327341	-1.093123583	-1.931792801	-1.088987978	-0.341608635	0.987595123	0.148925905	0.991730728	1.329203758	0.49053454	1.333339363	-0.838669218	0.004135605	0.842804823	0	0	0.040485	0	0	0	0	0	0	0	0.002278	1.00E-05	1.10E-05
Q8VDD5;Q5SV64;Q3UH59;Q61879;A0A2R8VKI5;Q8BXF2;A0A140LI60;E9Q264;A2AQP0 [Myosin-9 ...]	0.187911409	2.127263608	-0.482113641	1.181728424	1.201369205	-1.951438454	1.571645	-1.947302849	1.939352199	-0.670025049	0.993817015	1.013457797	-2.139349863	1.383733591	-2.135214258	-2.609377248	-0.945535184	-0.925894402	-4.078702062	-0.555618608	-4.074566457	1.663842064	1.683482846	-1.469324813	2.053758641	-1.465189208	0.019640782	-3.133166877	0.389916577	-3.129031273	-3.152807659	0.370275795	-3.148672054	3.523083454	0.004135605	-3.518947849	0.000198	0	0.005728	7.00E-06	5.00E-06	0.333008	2.00E-06	0.334691	2.00E-06	0.005093	0.000398	0.000302	1.00E-06
Q8VDM4 [26S proteasome non-ATPase regulatory subunit 2 ...]	-1.105266033	-1.545031009	-0.856767238	-0.932890932	-0.335558453	-0.394298185	0.687715246	-0.405295602	-0.439764976	0.248498795	0.172375101	0.76970758	0.710967848	1.792981279	0.699970431	0.688263771	0.612140077	1.209472556	1.150732824	2.232746255	1.139735407	-0.076123694	0.521208785	0.462469053	1.544482484	0.451471636	0.597332479	0.538592747	1.620606178	0.52759533	-0.058739732	1.023273699	-0.069737149	1.082013431	-0.010997417	-1.093010848	1	0.79739	1	1	1	1	0.61909	1	0.970623	1	1	0.877375	0.948245
Q8VDN2;D3YYN7;A0A0G2JGX4;Q8VCE0;Q6PIC6;Q6PIE5;Q9WV27;Q9Z1W8 [Sodium/potassium-transporting ATPase subunit alpha ...]	-1.27941097	-1.097232442	-1.258328133	-1.258661181	-1.278685006	-1.11443879	1.245690665	-1.112774819	0.182178528	0.021082837	0.020749789	0.000725964	0.16497218	2.525101636	0.166636151	-0.161095691	-0.16142874	-0.181452564	-0.017206348	2.342923107	-0.015542377	-0.000333049	-0.020356873	0.143889343	2.504018798	0.145553314	-0.020023824	0.144222391	2.504351847	0.145886362	0.164246216	2.524375671	0.165910187	2.360129456	0.001663971	-2.358465485	1	1	1	1	1	1	0.05878	1	1	1	1	1	0.999999
Q8VDU4;E9PXI0;P27870;Q9R0C8 [Proto-oncogene vav;Guanine nucleotide exchange fac ...]	0	1.152139927	0	0	0	0.055555556	0	0.069444444	1.152139927	0	0	0	0.055555556	0	0.069444444	-1.152139927	-1.152139927	-1.152139927	-1.096584371	-1.152139927	-1.082695482	0	0	0.055555556	0	0.069444444	0	0.055555556	0	0.069444444	0.055555556	0	0.069444444	-0.055555556	0.013888889	0.069444444	1	1	1	1	1	1	1	1	1	1	1	1	0.999999
Q8VEK3 [Heterogeneous nuclear ribonucleoprotein U ...]	-0.770303539	-0.142387024	-0.860955239	-1.02714899	-0.215985164	-0.039553867	0.590087525	-0.035418262	0.627916516	-0.0906517	-0.256845451	0.554318375	0.730749672	1.360391064	0.734885277	-0.718568215	-0.884761967	-0.07359814	0.102833156	0.732474549	0.106968761	-0.166193751	0.644970075	0.821401372	1.451042764	0.825536977	0.811163826	0.987595123	1.617236515	0.991730728	0.176431296	0.806072689	0.180566901	0.629641393	0.004135605	-0.625505788	0.020675	0.001179	0.002239	6.90E-05	0.00558	1.00E-05	0	8.00E-06	0.000118	0.244912	0.002951	0.00044	1.00E-06
Q91V55;D3YYM6;D3Z1S8;P97461 [40S ribosomal protein S5;40S ribosomal protein S5, ...]	-1.113587186	-1.293588673	-0.577004197	0.288356501	0.440933985	0.244397175	-0.594272043	0.24853278	-0.180001487	0.536582989	1.401943687	1.554521171	1.357984361	0.519315143	1.362119966	0.716584476	1.581945174	1.734522658	1.537985848	0.69931663	1.542121453	0.865360698	1.017938182	0.821401372	-0.017267846	0.825536977	0.152577484	-0.043959326	-0.882628544	-0.039823721	-0.19653681	-1.035206028	-0.192401205	-0.838669218	0.004135605	0.842804823	2.10E-05	9.00E-06	0.000557	0.243832	0.750989	0.187148	0.000284	0.187081	0.201309	0.000639	1.00E-06	1.10E-05	0
Q91VB8;P01942 [Hemoglobin subunit alpha ...]	0.968555426	1.51384158	0.228588698	2.486173287	-2.122421578	1.079726806	0.029807343	-2.669282891	0.545286154	-0.739966727	1.517617862	-3.090977004	0.111171381	-0.938748083	-3.637838316	-1.285252882	0.972331707	-3.636263158	-0.434114773	-1.484034237	-4.183124471	2.257584589	-2.351010276	0.851138108	-0.198781356	-2.897871589	-4.608594865	-1.406446481	-2.456365945	-5.155456178	3.202148384	2.152228921	-0.546861313	-1.049919464	-3.749009697	-2.699090233	0.001882	6.70E-05	0.496279	6.00E-06	6.00E-06	0.000938	1	1.00E-06	0.048665	0.018885	0.000301	0	0.864114
Q91X17;A0A140LI10 [Uromodulin;Uromodulin, secreted form ...]	1.677378941	-6.175894378	0.422282363	4.950428824	1.353312876	2.443690389	-3.691047343	2.9833998	-7.853273318	-1.255096578	3.273049884	-0.324066064	0.766311448	-5.368426284	1.306020859	6.59817674	11.1263232	7.529207254	8.619584767	2.484847034	9.159294177	4.528146462	0.931030514	2.021408026	-4.113329706	2.561117437	-3.597115948	-2.506738436	-8.641476168	-1.967029025	1.090377513	-5.04436022	1.630086923	-6.134737732	0.539709411	6.674447143	0	0	0	0	0	0	0	8.00E-06	0	6.00E-06	0	0.005558	8.00E-06
Q91X72;A0A1B0GS57 [Hemopexin ...]	1.520119474	2.892536547	2.126385832	0.542343591	-1.328665173	1.157925741	-2.219148206	-1.927933211	1.372417073	0.606266358	-0.977775883	-2.848784647	-0.362193733	-3.73926768	-3.448052685	-0.766150715	-2.350192956	-4.22120172	-1.734610806	-5.111684753	-4.820469758	-1.584042241	-3.455051005	-0.968460091	-4.345534038	-4.054319043	-1.871008764	0.61558215	-2.761491797	-2.470276802	2.486590914	-0.890483033	-0.599268038	-3.377073947	-3.085858952	0.291214995	0.001376	0.001495	0.845879	2.00E-06	0	8.30E-05	0	1.00E-06	9.00E-06	0.003553	0.000151	0	0.057368
Q91XL1 [ ...]	2.599893728	0.40069902	-0.084525996	-0.16064969	-0.328837147	0.377943056	-0.084525996	0.36694564	-2.199194709	-2.684419725	-2.760543419	-2.928730876	-2.221950672	-2.684419725	-2.232948089	-0.485225016	-0.56134871	-0.729536167	-0.022755963	-0.485225016	-0.03375338	-0.076123694	-0.244311151	0.462469053	0	0.451471636	-0.168187457	0.538592747	0.076123694	0.52759533	0.706780204	0.244311151	0.695782787	-0.462469053	-0.010997417	0.451471636	0.282472	1	1	1	1	1	1	1	0.349454	0.244912	0.228644	0.195429	0.375094
Q91YQ5;A0A0N4SUJ8 [Dolichyl-diphosphooligosaccharide--protein glycosy ...]	-0.801602319	-0.028684729	-0.532020686	-0.608477429	-0.79668871	0.018782154	0.350331226	-0.004440181	0.77291759	0.269581633	0.19312489	0.004913609	0.820384473	1.151933545	0.797162138	-0.503335957	-0.5797927	-0.768003981	0.047466883	0.379015955	0.024244548	-0.076456743	-0.264668024	0.55080284	0.882351913	0.527580505	-0.188211281	0.627259583	0.958808656	0.604037248	0.815470864	1.147019937	0.792248529	0.331549073	-0.023222335	-0.354771408	0.763326	0.807876	1	1	0.741576	0.905032	0.52802	0.924998	0.412248	0.967881	1	1	0.399969
Q91YR9;REV__Q3TVC7;REV__A0A0R4J177 [Prostaglandin reductase 1 ...]	-1.026063026	-1.194455844	-0.812524187	-1.46344793	1.430898338	-0.475852807	1.026386465	-0.471717202	-0.168392819	0.213538839	-0.437384904	2.456961364	0.550210219	2.05244949	0.554345824	0.381931658	-0.268992085	2.625354182	0.718603038	2.220842309	0.722738642	-0.650923743	2.243422525	0.33667138	1.838910652	0.340806985	2.894346268	0.987595123	2.489834394	0.991730728	-1.906751145	-0.404511873	-1.90261554	1.502239272	0.004135605	-1.498103667	1	0.004996	0.072043	7.00E-06	0	1.00E-06	0	1.00E-06	0.005444	0.0673	9.00E-06	0	1.00E-06
Q91Z25;Q9WV32;F6VVE6;D3Z6S0;F6THG2 [Actin-related protein 2/3 complex subunit 1B ...]	1.416401259	3.27604624	-0.126799934	-0.292993685	0.261832505	0.694601438	-0.14406778	0.698737043	1.859644981	-1.543201193	-1.709394944	-1.154568755	-0.721799821	-1.560469039	-0.717664217	-3.402846174	-3.569039925	-3.014213736	-2.581444802	-3.42011402	-2.577309197	-0.166193751	0.388632438	0.821401372	-0.017267846	0.825536977	0.55482619	0.987595123	0.148925905	0.991730728	0.432768933	-0.405900285	0.436904538	-0.838669218	0.004135605	0.842804823	1.10E-05	0	0.002239	6.90E-05	0.651637	1.00E-05	0.001086	8.00E-06	1.00E-06	3.00E-06	2.00E-06	0.000315	0.000766
Q91Z98 [Chitinase-like protein 4 ...]	3.267751944	6.321835539	-0.126799934	2.247643202	0.275394684	0.694601438	-0.14406778	0.698737043	3.054083595	-3.394551877	-1.020108742	-2.992357259	-2.573150506	-3.411819724	-2.569014901	-6.448635472	-4.074192337	-6.046440854	-5.627234101	-6.465903319	-5.623098496	2.374443136	0.402194618	0.821401372	-0.017267846	0.825536977	-1.972248517	-1.553041764	-2.391710982	-1.548906159	0.419206754	-0.419462465	0.423342358	-0.838669218	0.004135605	0.842804823	0	0	0.000596	0	0.028868	2.00E-06	0.000219	1.00E-06	0	0	1.30E-05	0	0
Q921I1;D3YYR8;F7BAE9;E9Q2Q7;F7CJN9;E9Q939;CON__Q29443;CON__Q0IIK2;CON__Q2HJF0 [Serotransferrin ...]	0.917318825	0.774148908	1.733564159	-1.115096924	-0.922716315	0.483817436	-1.733564159	0.00070086	-0.143169917	0.816245334	-2.032415749	-1.84003514	-0.433501389	-2.650882984	-0.916617965	0.959415251	-1.889245832	-1.696865223	-0.290331472	-2.507713067	-0.773448048	-2.848661083	-2.656280474	-1.249746723	-3.467128318	-1.732863298	0.192380609	1.59891436	-0.618467235	1.115797784	1.406533751	-0.810847844	0.923417175	-2.217381595	-0.483116576	1.734265019	1.40E-05	1.00E-06	1	0	0	0	0	0	0.220836	1.60E-05	1.00E-06	0	0.001489
Q921L6;Q60598 [Src substrate cortactin ...]	-1.601049848	-3.081851748	-1.064466859	-0.850900585	0.587310196	-0.243065487	0.793599145	-0.238929882	-1.4808019	0.536582989	0.750149263	2.188360044	1.357984361	2.394648993	1.362119966	2.017384889	2.230951163	3.669161944	2.838786261	3.875450893	2.842921866	0.213566274	1.651777055	0.821401372	1.858066004	0.825536977	1.438210781	0.607835098	1.64449973	0.611970703	-0.830375683	0.206288949	-0.826240078	1.036664632	0.004135605	-1.032529027	0	0	0.000374	0.789813	0	1.00E-06	0	1.00E-06	0	1.00E-06	2.80E-05	0	0
Q921R2;P62301;A0A0U1RQ71 [40S ribosomal protein S13 ...]	-1.106589222	0.041556207	0.809945586	-1.071138547	0.606466682	-0.887979462	1.039204249	-0.88807786	1.148145429	1.916534807	0.035450675	1.713055904	0.21860976	2.145793471	0.218511362	0.768389379	-1.112694754	0.564910475	-0.929535669	0.997648042	-0.929634067	-1.881084132	-0.203478903	-1.697925048	0.229258663	-1.698023446	1.677605229	0.183159085	2.110342796	0.183060687	-1.494446144	0.432737567	-1.494544542	1.927183711	-9.84E-05	-1.927282109	2.00E-06	0	0	0.000808	0	0	0	0	0	0	0.000398	0	0
Q922B2 [Aspartate--tRNA ligase, cytoplasmic ...]	-0.491750659	0.210055417	-0.329969646	-0.496163397	-0.837772032	0.491431726	0.059101932	0.495567331	0.701806076	0.161781013	-0.004412738	-0.346021374	0.983182385	0.550852591	0.987317989	-0.540025063	-0.706218814	-1.047827449	0.281376309	-0.150953485	0.285511914	-0.166193751	-0.507802387	0.821401372	0.389071578	0.825536977	-0.341608635	0.987595123	0.555265329	0.991730728	1.329203758	0.896873964	1.333339363	-0.432329794	0.004135605	0.436465399	0.003034	0.038009	0.002239	6.90E-05	1.00E-06	1.00E-05	0.381231	8.00E-06	0.000678	0.222214	1	0.011142	7.00E-06
Q924B0;O55023;Q80ZJ2 [Inositol monophosphatase 1 ...]	-0.663382923	0.147534358	-0.126799934	-0.292993685	-0.02534722	0.694601438	-0.14406778	0.698737043	0.810917281	0.536582989	0.370389238	0.638035703	1.357984361	0.519315143	1.362119966	-0.274334291	-0.440528042	-0.172881577	0.547067081	-0.291602138	0.551202685	-0.166193751	0.101452714	0.821401372	-0.017267846	0.825536977	0.267646465	0.987595123	0.148925905	0.991730728	0.719948658	-0.11872056	0.724084262	-0.838669218	0.004135605	0.842804823	0	1	0.000374	7.00E-06	0.005223	1.00E-06	0.000127	1.00E-06	0	1.00E-06	2.80E-05	0	0
Q93EU6 [ ...]	-0.024573056	-0.647020608	0.96895905	1.921025349	-0.023847091	0.140399124	-0.009147249	0.142063095	-0.622447552	0.993532105	1.945598405	0.000725964	0.16497218	0.015425807	0.166636151	1.615979657	2.568045957	0.623173516	0.787419732	0.637873359	0.789083703	0.952066299	-0.992806141	-0.828559925	-0.978106298	-0.826895954	-1.94487244	-1.780626225	-1.930172598	-1.778962254	0.164246216	0.014699843	0.165910187	-0.149546373	0.001663971	0.151210344	1	0.705798	0.65688	0.156002	1	1	1	1	0.719489	0.586797	0.15515	1	0.999999
Q99JI6;A0A0G2JDL9;P62835;A0A0G2JE52;A0A0G2JED9;A0A1W2P777 [Ras-related protein Rap-1b;Ras-related protein Rap ...]	1.360284943	2.039878178	0.446598982	2.9211147	0.136108224	0.694601438	-0.14406778	0.698737043	0.679593235	-0.913685961	1.560829756	-1.22417672	-0.665683505	-1.504352723	-0.661547901	-1.593279196	0.881236522	-1.903769955	-1.34527674	-2.183945958	-1.341141135	2.474515718	-0.310490759	0.248002456	-0.590666762	0.252138061	-2.785006476	-2.226513262	-3.06518248	-2.222377657	0.558493215	-0.280176004	0.562628819	-0.838669218	0.004135605	0.842804823	1.00E-06	1.00E-06	0.143491	0	1	0.000525	0.022549	0.000447	0.003305	0.000421	2.30E-05	1.00E-06	0.000128
Q99JY0;D3YXU1 [Trifunctional enzyme subunit beta, mitochondrial;3 ...]	-1.832253198	-2.559198155	-1.583754403	-1.42350825	-1.143054269	-1.12128535	0.687272977	-1.132282767	-0.726944957	0.248498795	0.408744948	0.689198929	0.710967848	2.519526175	0.699970431	0.975443752	1.135689905	1.416143886	1.437912805	3.246471132	1.426915388	0.160246153	0.440700134	0.462469053	2.27102738	0.451471636	0.280453981	0.3022229	2.110781227	0.291225483	0.021768919	1.830327247	0.010771502	1.808558327	-0.010997417	-1.819555744	0.822881	0.515841	1	1	1	1	0.697681	1	0.877265	1	1	0.954142	0.976893
Q99JY9;A0A087WS98;A0A087WP86;A0A087WQ14;A0A087WRA1;Q641P0;A0A087WQ83 [Actin-related protein 3 ...]	1.037478508	1.498195864	-0.480732905	-0.646926656	0.733244737	0.340668467	0.209865191	0.344804072	0.460717356	-1.518211413	-1.684405164	-0.304233771	-0.696810042	-0.827613317	-0.692674437	-1.978928769	-2.14512252	-0.764951127	-1.157527397	-1.288330673	-1.153391793	-0.166193751	1.213977642	0.821401372	0.690598096	0.825536977	1.380171393	0.987595123	0.856791847	0.991730728	-0.39257627	-0.523379546	-0.388440665	-0.130803276	0.004135605	0.13493888	1.00E-06	1.00E-06	0.036991	0.002433	7.00E-06	0.000525	0.059423	0.000447	0.014372	0	0	0.019568	9.00E-05
Q99KI0 [Aconitate hydratase, mitochondrial ...]	-1.30094039	-1.923387942	-1.279857552	-1.280190601	-0.611147981	-1.13596821	1.267220085	-1.134304239	-0.622447552	0.021082837	0.020749789	0.689792408	0.16497218	2.568160474	0.166636151	0.643530389	0.643197341	1.31223996	0.787419732	3.190608026	0.789083703	-0.000333049	0.668709571	0.143889343	2.547077637	0.145553314	0.66904262	0.144222391	2.547410686	0.145886362	-0.524820228	1.878368066	-0.523156257	2.403188294	0.001663971	-2.401524324	1	0.705798	1	1	0.762167	1	0.055129	1	0.719489	1	1	0.7084	0.999999
Q99KJ8 [Dynactin subunit 2 ...]	-1.000469823	-2.24769558	-0.964536143	-0.965019147	-0.021259641	-0.781860063	0.93308485	-0.781958461	-1.247225758	0.035933679	0.035450675	0.979210182	0.21860976	1.933554672	0.218511362	1.283159437	1.282676433	2.226435939	1.465835517	3.18078043	1.465737119	-0.000483004	0.943276502	0.18267608	1.897620993	0.182577682	0.943759506	0.183159085	1.898103997	0.183060687	-0.760600422	0.954344491	-0.76069882	1.714944913	-9.84E-05	-1.715043311	0	0	0.000122	5.40E-05	0	0	0	0	0	2.20E-05	2.80E-05	0	0
Q99LB4;P24452;D3YZN3;D3YU77;D3YTL5;D3Z4K5 [Macrophage-capping protein ...]	-1.19755009	0.714881503	0.891053112	0.682414274	0.95604577	0.160434271	0.390099387	0.164569876	1.912431593	2.088603203	1.879964364	2.15359586	1.357984361	1.587649478	1.362119966	0.17617161	-0.032467228	0.241164267	-0.554447232	-0.324782115	-0.550311627	-0.208638838	0.064992658	-0.730618842	-0.500953725	-0.726483237	0.273631496	-0.521980003	-0.292314887	-0.517844399	-0.795611499	-0.565946383	-0.791475894	0.229665117	0.004135605	-0.225529512	0	0	0	0	0	1.00E-06	0.000406	1.00E-06	0	0	0	0	0
Q99P58 [Ras-related protein Rab-27B ...]	-1.526786469	-1.526786469	-1.526786469	-1.526786469	-0.329422013	-1.471230913	1.526786469	-1.457342024	0	0	0	1.197364456	0.055555556	3.053572938	0.069444444	0	0	1.197364456	0.055555556	3.053572938	0.069444444	0	1.197364456	0.055555556	3.053572938	0.069444444	1.197364456	0.055555556	3.053572938	0.069444444	-1.141808901	1.856208482	-1.127920012	2.998017382	0.013888889	-2.984128493	1	1	1	1	1	1	1	1	1	1	1	1	0.999999
Q99PT1 [Rho GDP-dissociation inhibitor 1 ...]	-1.923887505	-0.815643539	-1.887953825	-1.888436829	0.750729688	-1.705277745	-0.589946301	-1.705376143	1.108243966	0.035933679	0.035450675	2.674617192	0.21860976	1.333941203	0.218511362	-1.072310287	-1.072793291	1.566373227	-0.889634206	0.225697238	-0.889732604	-0.000483004	2.638683513	0.18267608	1.298007524	0.182577682	2.639166517	0.183159085	1.298490528	0.183060687	-2.456007433	-1.340675989	-2.456105831	1.115331444	-9.84E-05	-1.115429842	0	0	0	0	0.000313	0	0	0	0	0.000474	0.000543	0	0
Q9CPX4;A0A1B0GR60;P29391;A0A1B0GRH4;P49945;A0A1Y7VNT9 [Ferritin;Ferritin light chain 1;Ferritin light cha ...]	0.718941901	3.209460602	-0.386555058	-0.47677507	-0.671458655	0.066719554	-0.410301133	0.093979096	2.490518702	-1.105496959	-1.195716971	-1.390400556	-0.652222346	-1.129243034	-0.624962805	-3.59601566	-3.686235673	-3.880919257	-3.142741048	-3.619761735	-3.115481506	-0.090220012	-0.284903597	0.453274612	-0.023746075	0.480534154	-0.194683585	0.543494625	0.066473937	0.570754166	0.738178209	0.261157522	0.765437751	-0.477020687	0.027259542	0.504280229	0.981763	0.009836	0.551551	0.447779	0.303041	0.971368	0.45428	0.998399	0.014382	0.265774	0.22382	0.147486	0.58719
Q9CQI6;A0A1D5RLP1 [Coactosin-like protein ...]	2.374305479	1.270851209	0.460491124	1.91496457	-0.228128804	0.694601438	-0.14406778	0.698737043	-1.10345427	-1.913814355	-0.459340909	-2.602434283	-1.679704041	-2.518373259	-1.675568436	-0.810360085	0.644113361	-1.498980013	-0.576249771	-1.414918989	-0.572114166	1.454473446	-0.688619928	0.234110314	-0.604558904	0.238245918	-2.143093374	-1.220363132	-2.05903235	-1.216227527	0.922730242	0.084061024	0.926865847	-0.838669218	0.004135605	0.842804823	0	4.70E-05	0.261344	1.00E-05	0.119738	0.008208	0.12196	0.007447	6.90E-05	1.40E-05	0.055671	0	3.00E-06
Q9CQR2 [40S ribosomal protein S21 ...]	-2.553884021	-3.164453866	-1.760351572	-2.518433346	-1.406806484	-2.335274262	1.324349217	-2.33537266	-0.610569844	0.79353245	0.035450675	1.147077537	0.21860976	3.878233238	0.218511362	1.404102294	0.646020519	1.757647381	0.829179604	4.488803083	0.829081206	-0.758081774	0.353545087	-0.57492269	3.084700789	-0.575021088	1.111626862	0.183159085	3.842782563	0.183060687	-0.928467777	2.731155702	-0.928566175	3.659623479	-9.84E-05	-3.659721877	0.098941	0.015649	0.770898	0.108728	1	0.192922	0.001807	0.187081	0.360089	0.242712	1	0.12381	0.920376
Q9CQV8;A2A5N1 [14-3-3 protein beta/alpha;14-3-3 protein beta/alph ...]	1.26015454	1.789477929	3.440337357	2.747604571	4.519802482	3.01250763	0.06809528	3.756047358	0.529323389	2.180182817	1.487450031	3.259647943	1.75235309	-1.19205926	2.495892819	1.650859428	0.958126642	2.730324553	1.223029701	-1.721382649	1.966569429	-0.692732786	1.079465125	-0.427829727	-3.372242077	0.315710001	1.772197911	0.264903059	-2.679509291	1.008442787	-1.507294852	-4.451707203	-0.763755124	-2.94441235	0.743539728	3.687952079	0.300023	0.181479	0.008417	0.02368	0.001256	0.015636	1	0.004303	0.798528	0.07215	0.23273	0.011142	0.157879
Q9CQW9;A0A1B0GT68;Q99J93 [Interferon-induced transmembrane protein 3;Interfe ...]	0	2.01824803	0	0	0	0.055555556	0	0.069444444	2.01824803	0	0	0	0.055555556	0	0.069444444	-2.01824803	-2.01824803	-2.01824803	-1.962692474	-2.01824803	-1.948803586	0	0	0.055555556	0	0.069444444	0	0.055555556	0	0.069444444	0.055555556	0	0.069444444	-0.055555556	0.013888889	0.069444444	1	1	1	1	1	1	1	1	1	1	1	1	0.999999
Q9CR16 [Peptidyl-prolyl cis-trans isomerase D ...]	0	1.498668622	0	0	0	0.055555556	0	0.069444444	1.498668622	0	0	0	0.055555556	0	0.069444444	-1.498668622	-1.498668622	-1.498668622	-1.443113066	-1.498668622	-1.429224177	0	0	0.055555556	0	0.069444444	0	0.055555556	0	0.069444444	0.055555556	0	0.069444444	-0.055555556	0.013888889	0.069444444	1	1	1	1	1	1	1	1	1	1	1	1	0.999999
Q9CR57 [60S ribosomal protein L14 ...]	0.291464193	0.151393751	1.144106341	1.79190158	1.096731934	-0.35899672	0.510221506	-0.359095118	-0.140070443	0.852642147	1.500437387	0.805267741	-0.650460913	0.218757313	-0.650559311	0.99271259	1.64050783	0.945338183	-0.51039047	0.358827756	-0.510488868	0.64779524	-0.047374407	-1.50310306	-0.633884834	-1.503201458	-0.695169646	-2.1508983	-1.281680074	-2.150996698	-1.455728654	-0.586510428	-1.455827052	0.869218226	-9.84E-05	-0.869316624	0.000393	0.001283	4.00E-06	0	1.00E-05	0.494518	0.004127	0.481222	0.470569	0.000292	5.00E-06	0.001855	0.001692
Q9CVB6;D3YXG6;A0A087WRT2 [Actin-related protein 2/3 complex subunit 2 ...]	1.209426547	1.293865585	0.128311409	-0.549782326	1.046055193	-0.244230672	0.227334454	1.865952308	0.084439038	-1.081115137	-1.759208873	-0.163371354	-1.453657219	-0.982092093	0.656525761	-1.165554175	-1.843647911	-0.247810392	-1.538096257	-1.066531131	0.572086723	-0.678093736	0.917743783	-0.372542081	0.099023044	1.737640899	1.595837519	0.305551654	0.77711678	2.415734634	-1.290285865	-0.818720739	0.819897115	0.471565126	2.11018298	1.638617854	1.30E-05	6.00E-06	0.083983	0.110439	6.10E-05	1	0.02465	1.00E-06	0.563255	4.00E-06	0	0.317486	0
Q9CWJ9 [Bifunctional purine biosynthesis protein PURH;Phos ...]	-0.330358131	0.370081751	-0.042273937	-0.132343994	0.18229452	0.372213937	-0.059541784	0.401235848	0.700439882	0.288084194	0.198014137	0.512652651	0.702572068	0.270816348	0.731593979	-0.412355689	-0.502425746	-0.187787232	0.002132186	-0.429623535	0.031154097	-0.090070057	0.224568457	0.414487875	-0.017267846	0.443509785	0.314638514	0.504557932	0.072802211	0.533579842	0.189919418	-0.241836303	0.218941328	-0.431755721	0.029021911	0.460777631	1	1	1	1	1	1	1	1	0.862121	1	1	1	0.955981
Q9CX34 [Suppressor of G2 allele of SKP1 homolog ...]	-0.447652796	-0.410744725	-0.426569959	1.571269887	1.931334801	-0.282680616	0.413932492	-0.281016645	0.036908071	0.021082837	2.018922683	2.378987597	0.16497218	0.861585288	0.166636151	-0.015825234	1.982014612	2.342079526	0.128064109	0.824677217	0.12972808	1.997839846	2.35790476	0.143889343	0.840502451	0.145553314	0.360064914	-1.853950503	-1.157337395	-1.852286532	-2.214015417	-1.517402309	-2.212351446	0.696613108	0.001663971	-0.694949137	1	1	1	0.151217	0.086027	1	0.650613	1	1	1	0.151383	0.085846	0.999999
Q9CZ13;A0A0A6YW82 [Cytochrome b-c1 complex subunit 1, mitochondrial ...]	-0.768431874	-0.325865048	-0.732498195	-0.732981199	-0.190662837	-0.549822115	0.701046901	-0.549920513	0.442566826	0.035933679	0.035450675	0.577769037	0.21860976	1.469478776	0.218511362	-0.406633147	-0.407116151	0.135202211	-0.223957066	1.02691195	-0.224055464	-0.000483004	0.541835358	0.18267608	1.433545097	0.182577682	0.542318362	0.183159085	1.434028101	0.183060687	-0.359159277	0.891709739	-0.359257675	1.250869016	-9.84E-05	-1.250967414	0	0	0.000122	5.40E-05	0	0	0	0	0	2.20E-05	2.80E-05	0	0
Q9CZM2;B8JKK2 [60S ribosomal protein L15;Ribosomal protein L15 ...]	-1.218612306	-0.922835898	0.299244336	-0.797871662	0.475813557	-1.372807975	1.316254232	-1.372906373	0.295776408	1.517856642	0.420740644	1.694425863	-0.154195669	2.534866538	-0.154294067	1.222080234	0.124964236	1.398649455	-0.449972077	2.23909013	-0.450070475	-1.097115998	0.176569221	-1.67205231	1.017009896	-1.672150708	1.273685219	-0.574936313	2.114125894	-0.575034711	-1.848621532	0.840440675	-1.84871993	2.689062207	-9.84E-05	-2.689160605	0.897178	0.125111	3.40E-05	0.119417	5.00E-06	1	0	1	0.329535	6.80E-05	0.253127	2.50E-05	0.674729
Q9CZX8;D3YUT3;D3YUG3;D3Z5R8;D3Z722;S4R223 [40S ribosomal protein S19 ...]	-2.823038413	-2.363121785	-2.516261028	-2.121601093	-2.059125973	-1.694859656	0.90580523	-1.690724052	0.459916628	0.306777385	0.701437319	0.76391244	1.128178756	3.728843643	1.132314361	-0.153139243	0.241520691	0.303995812	0.668262128	3.268927015	0.672397733	0.394659935	0.457135055	0.821401372	3.422066259	0.825536977	0.06247512	0.426741437	3.027406324	0.430877042	0.364266317	2.964931203	0.368401921	2.600664887	0.004135605	-2.596529282	0	1.00E-06	1.00E-06	8.50E-05	5.00E-06	0.000121	0	0.000111	0.008257	0.041517	0.004131	0.000152	8.00E-06
Q9D0I9 [Arginine--tRNA ligase, cytoplasmic ...]	0	1.467396668	0	0	0	0.055555556	0	0.069444444	1.467396668	0	0	0	0.055555556	0	0.069444444	-1.467396668	-1.467396668	-1.467396668	-1.411841112	-1.467396668	-1.397952223	0	0	0.055555556	0	0.069444444	0	0.055555556	0	0.069444444	0.055555556	0	0.069444444	-0.055555556	0.013888889	0.069444444	1	1	1	1	1	1	1	1	1	1	1	1	0.999999
Q9D0J8 [Parathymosin ...]	-3.464561677	-3.464561677	-1.776256502	-3.464561677	-0.809016235	-3.409006121	-0.312778156	-3.395117232	0	1.688305175	0	2.655545442	0.055555556	3.151783521	0.069444444	1.688305175	0	2.655545442	0.055555556	3.151783521	0.069444444	-1.688305175	0.967240267	-1.63274962	1.463478346	-1.618860731	2.655545442	0.055555556	3.151783521	0.069444444	-2.599989886	0.496238079	-2.586100997	3.096227965	0.013888889	-3.082339076	0	0	5.00E-06	0	0	0	1.00E-06	0	1	1.20E-05	1	0	0.431763
Q9D132 [Uroplakin-1a ...]	-1.420078945	-3.410104814	-2.126945377	-2.127428382	-0.265239766	-1.944269297	-2.139080636	-1.944367695	-1.990025869	-0.706866432	-0.707349436	1.154839179	-0.524190352	-0.719001691	-0.52428875	1.283159437	1.282676433	3.144865048	1.465835517	1.271024178	1.465737119	-0.000483004	1.861705611	0.18267608	-0.012135259	0.182577682	1.862188615	0.183159085	-0.011652255	0.183060687	-1.679029531	-1.87384087	-1.679127929	-0.19481134	-9.84E-05	0.194712941	0	0	0	0	0	0	0	0	0	0	0	0	1.00E-06
Q9D154;Z4YK03;Q8VHP7;Q5SV42 [Leukocyte elastase inhibitor A ...]	2.853969024	4.121356068	1.508288784	3.167475513	0.601987543	0.694601438	-0.14406778	0.698737043	1.267387044	-1.34568024	0.313506489	-2.251981481	-2.159367586	-2.998036804	-2.155231981	-2.613067284	-0.953880555	-3.519368525	-3.42675463	-4.265423848	-3.422619025	1.659186729	-0.906301241	-0.813687346	-1.652356564	-0.809551741	-2.56548797	-2.472874075	-3.311543293	-2.46873847	0.092613895	-0.746055323	0.0967495	-0.838669218	0.004135605	0.842804823	0	0	3.10E-05	0	0.110465	0.000592	0.024555	0.000508	0.00023	9.60E-05	0.112848	1.50E-05	0
Q9D2V7 [Coronin-7 ...]	-0.024573056	0.946482818	-0.003490218	-0.003823267	-0.023847091	0.140399124	-0.009147249	0.142063095	0.971055873	0.021082837	0.020749789	0.000725964	0.16497218	0.015425807	0.166636151	-0.949973036	-0.950306085	-0.970329909	-0.806083693	-0.955630066	-0.804419722	-0.000333049	-0.020356873	0.143889343	-0.00565703	0.145553314	-0.020023824	0.144222391	-0.005323982	0.145886362	0.164246216	0.014699843	0.165910187	-0.149546373	0.001663971	0.151210344	1	0.549246	1	1	1	1	1	1	0.52783	1	1	1	0.999999
Q9D668 [Arrestin domain-containing protein 2 ...]	-1.079851866	0.682561869	-1.079851866	-1.079851866	-1.079851866	-1.02429631	-1.079851866	-1.010407421	1.762413735	0	0	0	0.055555556	0	0.069444444	-1.762413735	-1.762413735	-1.762413735	-1.70685818	-1.762413735	-1.692969291	0	0	0.055555556	0	0.069444444	0	0.055555556	0	0.069444444	0.055555556	0	0.069444444	-0.055555556	0.013888889	0.069444444	1	1	1	1	1	1	1	1	1	1	1	1	0.999999
Q9D6Y7;A0A1B0GT40 [Mitochondrial peptide methionine sulfoxide reducta ...]	1.648322639	1.82055314	-0.006167799	0.669459688	-0.02758016	0.088174495	-0.012646028	0.100301014	0.172230501	-1.654490438	-0.978862952	-1.675902799	-1.560148145	-1.660968667	-1.548021625	-1.826720939	-1.151093453	-1.8481333	-1.732378646	-1.833199168	-1.720252126	0.675627486	-0.021412361	0.094342293	-0.006478229	0.106468813	-0.697039848	-0.581285193	-0.682105715	-0.569158673	0.115754655	0.014934133	0.127881175	-0.100820522	0.01212652	0.112947042	0.24088	0.173978	1	0.811687	1	1	1	1	1	0.236185	0.562306	0.223068	0.281219
Q9D819 [Inorganic pyrophosphatase ...]	-0.122685286	-1.103778094	-1.103778094	-1.103778094	0.830423144	-1.048222538	1.103778094	-1.034333649	-0.981092808	-0.981092808	-0.981092808	0.95310843	-0.925537253	1.226463379	-0.911648364	0	0	1.934201238	0.055555556	2.207556187	0.069444444	0	1.934201238	0.055555556	2.207556187	0.069444444	1.934201238	0.055555556	2.207556187	0.069444444	-1.878645682	0.273354949	-1.864756793	2.152000632	0.013888889	-2.138111743	0.000268	1	1	1	1.40E-05	0.643403	1.00E-05	0.481152	0.000257	0.00031	0.000317	0.00869	0.000414
Q9D898 [Actin-related protein 2/3 complex subunit 5-like p ...]	-0.424918638	0.545648519	-0.424918638	-0.424918638	0.739206238	-0.369363083	0.424918638	-0.355474194	0.970567157	0	0	1.164124877	0.055555556	0.849837276	0.069444444	-0.970567157	-0.970567157	0.19355772	-0.915011601	-0.12072988	-0.901122712	0	1.164124877	0.055555556	0.849837276	0.069444444	1.164124877	0.055555556	0.849837276	0.069444444	-1.108569321	-0.3142876	-1.094680432	0.794281721	0.013888889	-0.780392832	1	0	1	1	7.80E-05	0.579994	0.000276	0.41327	0	1	1	8.60E-05	0.531245
Q9D8D6;B2RV77 [ ...]	0	1.502100045	0	0	0	0.055555556	0	0.069444444	1.502100045	0	0	0	0.055555556	0	0.069444444	-1.502100045	-1.502100045	-1.502100045	-1.446544489	-1.502100045	-1.4326556	0	0	0.055555556	0	0.069444444	0	0.055555556	0	0.069444444	0.055555556	0	0.069444444	-0.055555556	0.013888889	0.069444444	1	1	1	1	1	1	1	1	1	1	1	1	0.999999
Q9D8E6 [60S ribosomal protein L4 ...]	-0.643710461	-0.394345874	-0.355626267	-0.445696324	1.835067967	0.058861607	0.253810546	0.087883518	0.249364587	0.288084194	0.198014137	2.478778428	0.702572068	0.897521007	0.731593979	0.038719607	-0.05135045	2.229413841	0.453207481	0.64815642	0.482229392	-0.090070057	2.190694234	0.414487875	0.609436813	0.443509785	2.280764291	0.504557932	0.69950687	0.533579842	-1.776206359	-1.581257421	-1.747184449	0.194948939	0.029021911	-0.165927028	1	1	1	1	0.404814	1	1	1	1	1	1	0.298927	0.955981
Q9D8N0 [Elongation factor 1-gamma ...]	-1.310611242	-1.528101791	-1.408678138	-1.058048062	0.348523698	-0.587276767	0.515825136	-0.583141162	-0.217490549	-0.098066896	0.25256318	1.65913494	0.723334476	1.826436378	0.72747008	0.119423653	0.47005373	1.87662549	0.940825025	2.043926927	0.94496063	0.350630077	1.757201837	0.821401372	1.924503274	0.825536977	1.40657176	0.470771295	1.573873197	0.4749069	-0.935800465	0.167301437	-0.93166486	1.103101902	0.004135605	-1.098966297	0.001416	0.001433	0.000963	0.03846	0.002776	0.971368	0.000199	0.988667	0.338704	0.520389	0.208391	3.00E-06	6.70E-05
Q9D997;Q9QZ08;D3YXG2 [N-acetyl-D-glucosamine kinase ...]	0	0	0	0	2.359465337	0.055555556	0	0.069444444	0	0	0	2.359465337	0.055555556	0	0.069444444	0	0	2.359465337	0.055555556	0	0.069444444	0	2.359465337	0.055555556	0	0.069444444	2.359465337	0.055555556	0	0.069444444	-2.303909781	-2.359465337	-2.290020892	-0.055555556	0.013888889	0.069444444	1	1	1	1	1	1	1	1	1	1	1	1	0.999999
Q9DAY9;Q5SQB0;Q5SQB5;Q61937 [Nucleophosmin ...]	0.98350599	-0.166133767	-0.009658017	-0.010141021	1.064830654	0.173018063	-0.021793276	0.172919665	-1.149639757	-0.993164007	-0.993647012	0.081324664	-0.810487927	-1.005299266	-0.810586325	0.156475749	0.155992745	1.230964421	0.33915183	0.14434049	0.339053432	-0.000483004	1.074488672	0.18267608	-0.012135259	0.182577682	1.074971676	0.183159085	-0.011652255	0.183060687	-0.891812591	-1.086623931	-0.891910989	-0.19481134	-9.84E-05	0.194712941	0	0.009206	0.001496	0.001045	0	0	0.000102	0	0	0	0	0.24866	0
Q9DB77;A0A140LI98 [Cytochrome b-c1 complex subunit 2, mitochondrial ...]	-0.834857682	-0.317383947	-0.813774844	-0.814107893	-0.834131717	-0.669885502	0.801137377	-0.668221531	0.517473735	0.021082837	0.020749789	0.000725964	0.16497218	1.635995059	0.166636151	-0.496390898	-0.496723947	-0.516747771	-0.352501555	1.118521324	-0.350837584	-0.000333049	-0.020356873	0.143889343	1.614912221	0.145553314	-0.020023824	0.144222391	1.61524527	0.145886362	0.164246216	1.635269095	0.165910187	1.471022879	0.001663971	-1.469358908	1	0.82691	1	1	1	1	0.23866	1	0.798528	1	1	1	0.999999
Q9DBB9 [Carboxypeptidase N subunit 2 ...]	-0.352484122	-1.085330163	0.990000008	-1.293255762	-1.634864398	-0.30566064	-1.144329858	-0.301525035	-0.732846041	1.34248413	-0.94077164	-1.282380276	0.046823483	-0.791845736	0.050959087	2.075330171	-0.207925599	-0.549534234	0.779669524	-0.058999694	0.783805129	-2.28325577	-2.624864406	-1.295660647	-2.134329865	-1.291525043	-0.341608635	0.987595123	0.148925905	0.991730728	1.329203758	0.49053454	1.333339363	-0.838669218	0.004135605	0.842804823	0	0	0.130116	0	0	0	0	0	2.10E-05	0	0	0	0.483406
Q9DBJ1;O70250 [Phosphoglycerate mutase 1;Phosphoglycerate mutase ...]	1.210932934	2.828051924	-0.846679769	0.062365615	-0.602506256	-0.025278397	-0.095837908	-0.021142793	1.61711899	-2.057612703	-1.148567319	-1.81343919	-1.236211331	-1.306770842	-1.232075727	-3.674731693	-2.765686309	-3.430558179	-2.853330321	-2.923889831	-2.849194716	0.909045384	0.244173513	0.821401372	0.750841861	0.825536977	-0.664871871	-0.087644012	-0.158203523	-0.083508407	0.577227858	0.506668348	0.581363463	-0.07055951	0.004135605	0.074695115	0.000168	0	0.000832	1	0.005255	0.781039	0.583925	0.805416	0	0	0.000757	0	1.00E-06
Q9DBS1 [Transmembrane protein 43 ...]	0	1.373762676	0	0	0	0.055555556	0	0.069444444	1.373762676	0	0	0	0.055555556	0	0.069444444	-1.373762676	-1.373762676	-1.373762676	-1.31820712	-1.373762676	-1.304318231	0	0	0.055555556	0	0.069444444	0	0.055555556	0	0.069444444	0.055555556	0	0.069444444	-0.055555556	0.013888889	0.069444444	1	1	1	1	1	1	1	1	1	1	1	1	0.999999
Q9DC51 [Guanine nucleotide-binding protein G(k) subunit al ...]	1.909987254	1.191790326	-0.126799934	1.134394131	-0.374833641	0.694601438	-0.14406778	0.698737043	-0.718196928	-2.036787188	-0.775593123	-2.284820895	-1.215385816	-2.054055034	-1.211250211	-1.318590259	-0.057396195	-1.566623967	-0.497188888	-1.335858106	-0.493053283	1.261194065	-0.248033707	0.821401372	-0.017267846	0.825536977	-1.509227772	-0.439792693	-1.278461911	-0.435657088	1.069435079	0.230765861	1.073570684	-0.838669218	0.004135605	0.842804823	0	1.00E-06	0.002239	0	0.000353	1.00E-05	0.001086	8.00E-06	1.90E-05	0	1.00E-06	0	0
Q9DCD0 [6-phosphogluconate dehydrogenase, decarboxylating ...]	3.424028462	4.781376942	1.688989251	2.851617969	3.623414223	0.694601438	-0.14406778	2.155536952	1.357348479	-1.735039211	-0.572410494	0.199385761	-2.729427024	-3.568096242	-1.26849151	-3.092387691	-1.929758973	-1.157962718	-4.086775504	-4.925444722	-2.62583999	1.162628718	1.934424972	-0.994387813	-1.833057031	0.466547701	0.771796254	-2.157016531	-2.995685749	-0.696081017	-2.928812785	-3.767482003	-1.467877271	-0.838669218	1.460935514	2.299604732	0	0	0.000125	0	0	0.01575	0.171257	0.000274	0.000644	2.60E-05	0.015717	0.393323	0
Q9DCM0 [Persulfide dioxygenase ETHE1, mitochondrial ...]	2.341977488	1.928190699	0	0	0	0.055555556	0	0.069444444	-0.413786788	-2.341977488	-2.341977488	-2.341977488	-2.286421932	-2.341977488	-2.272533043	-1.928190699	-1.928190699	-1.928190699	-1.872635144	-1.928190699	-1.858746255	0	0	0.055555556	0	0.069444444	0	0.055555556	0	0.069444444	0.055555556	0	0.069444444	-0.055555556	0.013888889	0.069444444	1	1	1	1	1	1	1	1	1	1	1	1	0.999999
Q9EQ06 [Estradiol 17-beta-dehydrogenase 11 ...]	-0.817695432	0.190539733	-0.807364525	-0.897584537	-0.791637586	-0.354089912	0.686734977	-0.326830371	1.008235165	0.010330907	-0.079889105	0.026057846	0.463605519	1.504430409	0.490865061	-0.997904258	-1.08812427	-0.982177319	-0.544629646	0.496195244	-0.517370104	-0.090220012	0.015726939	0.453274612	1.494099502	0.480534154	0.105946952	0.543494625	1.584319514	0.570754166	0.437547673	1.478372563	0.464807215	1.04082489	0.027259542	-1.013565348	1	0.407452	1	1	1	0.972214	0.152042	0.942446	0.330043	1	1	1	0.796928
Q9EQ20 [Methylmalonate-semialdehyde dehydrogenase [acylati ...]	-0.427240972	-1.049688524	-0.406158135	-0.406491183	0.106272132	-0.262268792	0.393520667	-0.260604821	-0.622447552	0.021082837	0.020749789	0.533513104	0.16497218	0.820761639	0.166636151	0.643530389	0.643197341	1.155960656	0.787419732	1.443209191	0.789083703	-0.000333049	0.512430266	0.143889343	0.799678802	0.145553314	0.512763315	0.144222391	0.800011851	0.145886362	-0.368540924	0.287248536	-0.366876953	0.655789459	0.001663971	-0.654125488	1	0.705798	1	1	0.873406	1	0.656826	1	0.719489	1	1	0.828582	0.999999
Q9EQH3 [Vacuolar protein sorting-associated protein 35 ...]	0.286528009	0.738060716	-0.006167799	-0.006317754	-0.02758016	0.088174495	-0.012646028	0.100301014	0.451532707	-0.292695808	-0.292845764	-0.314108169	-0.198353515	-0.299174037	-0.186226995	-0.744228515	-0.74437847	-0.765640876	-0.649886222	-0.750706744	-0.637759702	-0.000149955	-0.021412361	0.094342293	-0.006478229	0.106468813	-0.021262406	0.094492249	-0.006328273	0.106618769	0.115754655	0.014934133	0.127881175	-0.100820522	0.01212652	0.112947042	1	0.679958	1	1	1	1	1	1	0.836597	1	1	0.998792	0.999999
Q9ERI2 [Ras-related protein Rab-27A ...]	-0.045591697	1.093330696	-0.009658017	-0.010141021	-0.051427252	0.173018063	-0.021793276	0.172919665	1.138922392	0.035933679	0.035450675	-0.005835555	0.21860976	0.02379842	0.218511362	-1.102988713	-1.103471717	-1.144757947	-0.920312632	-1.115123972	-0.92041103	-0.000483004	-0.041769234	0.18267608	-0.012135259	0.182577682	-0.04128623	0.183159085	-0.011652255	0.183060687	0.224445315	0.029633975	0.224346917	-0.19481134	-9.84E-05	0.194712941	2.00E-06	0	0.001177	0.000808	1.00E-06	0	7.50E-05	0	0	0.000355	0.000398	0.503657	0
Q9ERL7;D3Z2F6;D3YY16;A0A2I3BR94;A0A2I3BPS1;Q9CQI3 [Glia maturation factor gamma;Glia maturation facto ...]	2.49474846	-0.005798895	-0.003490218	2.858230786	0.534903975	0.140399124	-0.009147249	0.142063095	-2.500547356	-2.498238679	0.363482326	-1.959844486	-2.354349336	-2.503895709	-2.352685365	0.002308677	2.864029682	0.54070287	0.14619802	-0.003348353	0.147861991	2.861721005	0.538394193	0.143889343	-0.00565703	0.145553314	-2.323326811	-2.717831662	-2.867378035	-2.716167691	-0.394504851	-0.544051224	-0.39284088	-0.149546373	0.001663971	0.151210344	0.067559	1	1	0.038615	0.857554	1	1	1	0.064269	0.066168	1	0.151381	0.086262
Q9ET01;Q3UEJ6;E9PUM3 [Glycogen phosphorylase, liver form;Alpha-1,4 gluca ...]	1.179386299	1.484554072	-0.726236744	0.750208075	0.388440057	0.095164628	0.45536903	0.099300233	0.305167774	-1.905623043	-0.429178224	-0.790946241	-1.084221671	-0.724017269	-1.080086066	-2.210790816	-0.734345998	-1.096114015	-1.389389445	-1.029185042	-1.38525384	1.476444819	1.114676801	0.821401372	1.181605774	0.825536977	-0.361768018	-0.655043447	-0.294839045	-0.650907842	-0.29327543	0.066928973	-0.289139825	0.360204402	0.004135605	-0.356068797	0	0	0.035921	1.00E-06	0.013009	0.000505	0.003573	0.000424	0.016976	0	0.00263	0.01928	2.00E-06
[truncated: 36 more rows]
[truncated: 372 more columns]
