# Supplementary material for: Inhibiting host-protein deposition on urinary catheters reduces associated urinary tract infections
Source: eLife. 2022 Mar 29;11:e75798. doi: 10.7554/eLife.75798 (PMC8986317; doi:10.7554/eLife.75798)
Supplement: Source data 1. [file elife-75798-data1.xlsx]

## Sheet: Figure 1B
Catheter Colonization (% of whole)	EF	EC	PA	KP	AB	CA
Pathogen alone	3.03811	1.3414	0	6.99708	3.27869	0.202224
	0.543355	0.458766	0.442478	0.129366	0.273973	0
	0.541272	0.422133	1.0101	2.09205	1.03627	0.248139
	1.0334		0.342466	0	0.442478	1.0101
Pathogen colocalizing with Fg	96.9619	98.6586	100	93.0029	96.7213	99.7978
	99.4566	99.5412	99.5575	99.8706	99.726	100
	99.4587	99.5779	98.9899	97.9079	98.9637	99.7519
	98.9666		99.6575	100	99.5575	98.9899

## Sheet: Figure 2 A-F
Flourecence relative to Fg coated silicone
EF				EC				PA			KP					AB				CA
Fg	BSA	UC		Fg	BSA	UC		Fg	BSA	UC		Fg	BSA	UC		Fg	BSA	UC		Fg	BSA	UC
89.5099	127.536	-23.5585		86.2856	19.631	30.4823		85.6221	66.8542	63.8653		74.411	47.793	40.1734		74.411	47.793	40.1734		89.5099	127.536	-23.5585
117.193	88.0427	-22.3567		127.206	19.4408	39.3165		121.095	76.1524	118.116		107.105	44.3438	43.8789		107.105	44.3438	43.8789		117.193	88.0427	-22.3567
112.712	30.9836	-21.7684		119.611	16.6625	42.3976		130.848	43.5027	86.4432		117.357	70.539	49.1184		117.357	70.539	49.1184		112.712	30.9836	-21.7684
104.61	129.688	-14.7895		89.7332	23.2119	22.0107		79.0278	33.8667	71.6453		77.0018	44.1975	70.3604		77.0018	44.1975	70.3604		104.61	129.688	-14.7895
75.9741	43.2784	-16.0352		77.1642	26.2215	28.5109		83.4076	34.4275	28.3899		129.332	47.6711	40.5897		129.332	47.6711	40.5897		75.9741	43.2784	-16.0352
98.5444	29.1577	-27.2982		87.6232	14.3385	39.6264		108.388	63.1232	24.255		94.793	30.1636	19.1199		94.793	30.1636	19.1199		98.5444	29.1577	-27.2982
92.7347	37.2521	-28.9318		98.5149	25.0832	47.1346		82.0762	24.8152	17.1019		105.782	25.0353	51.9064		105.782	25.0353	51.9064		92.7347	37.2521	-28.9318
72.7501	22.2117	52.4767		109.963	28.164	40.6139		97.0508	50.2002	34.5778		87.5373	29.3048	38.7503		87.5373	29.3048	38.7503		72.7501	22.2117	52.4767
100.177	36.5825	22.7872		110.132	26.9817	16.4609		117.738	62.5266	25.8985		102.445	17.408	67.7597		102.445	17.408	67.7597		100.177	36.5825	22.7872
135.794	47.7119	29.7162		93.7671	57.4803	26.9146		94.7469	37.9849	22.8399		116.273	26.1501	-7.82507		116.273	26.1501	-7.82507		135.794	20.1671	29.7162
99.6297	19.9953	53.9087		101.642	37.3436	27.8892		125.939	71.3428	40.8651		87.9629	46.4345	-7.28221		87.9629	46.4345	-7.28221		111.709	6.03578	53.9087
98.4641	26.8405	28.3676		102.462	47.8757	28.5012		62.6273	63.9204	18.4424		77.0892	37.2548	28.3306		77.0892	37.2548	28.3306		91.3356	15.369	28.3676
89.1089	38.6839	30.6765		111.344	52.0711	24.7392		111.512	52.3287	62.9183		126.631	50.6525	44.0345		126.631	50.6525	44.0345		76.516	-2.53145	30.6765
136.354	35.0573	43.8303		92.5608	44.0068	25.2777		99.9222		29.2667		119.579	55.4864	35.7873		119.579	55.4864	35.7873		43.4647	7.76241	43.8303
76.4432	91.7709	33.4503		91.9919		27.9746				57.4721		75.0788	55.3719	15.425		75.0788	55.3719	15.425		176.975	8.36767	33.4503
99.9265	83.7694	24.8809				30.3276				71.3993		101.622	51.1503	15.0272		101.622	51.1503	15.0272		142.375	46.3338	24.8809
101.171	94.0358	46.5456				25.6716				28.1259		88.1798	67.5481	21.0623		88.1798	67.5481	21.0623		105.856	58.3167	46.5456
101.264	73.5852	125.911				22.8844				55.9899		61.0526	57.6874	15.4531		61.0526	57.6874	15.4531		93.4772	55.5716	67.8027
98.0158	80.8418	162.121				19.0181				30.8453		97.415	70.3402	31.3482		97.415	70.3402	31.3482		69.5237	45.4997	12.3947
99.6224	86.9248	69.0682				22.9049				23.8833		107.061		16.955		107.061		16.955		126.1	48.3904	21.2914
86.803		73.7569				38.6281				8.6751		146.292		60.7773		146.292		60.7773		77.7442	38.9191	20.7212
		87.4638				25.6432				0.928468		124.781		25.2359		124.781		25.2359		105.063	47.6103	4.48129
		101.433				29.3372				19.6288				36.5748				36.5748		79.86	46.8847	55.9197
		63.8156				39.2909				18.5656				68.6036				68.6036		121.284	70.9575	20.2443
		80.1176				44.5623				27.2992				28.8083				28.8083		118.795	55.2624	63.6844
		73.4496				33.3115				18.8037				36.6735				36.6735		97.5977	71.8087	59.4593
		54.9519				27.3718				22.2891				27.9254				27.9254		94.7737	52.6797	57.8764
		60.113				37.1394				35.3847				17.8568				17.8568		114.19	63.5894	57.4955
		89.9899				26.0761				44.1364				46.2658				46.2658		106.046	75.2155	50.125
		88.9959				34.0731				41.7798				29.4371				29.4371		67.2507	33.3282	63.5195
		79.8939				26.1671				44.165				66.6664				66.6664		80.062	28.7522	64.2628
		102.117				35.1952				22.706				19.0712				19.0712				79.5726
		86.8667								39.4151				56.7069				56.7069				56.5417
		91.8148												60.6126				60.6126				73.753
														45.361				45.361				79.6234
														46.2479				46.2479				85.7097
														51.0869				51.0869				96.441
														76.3798				76.3798				49.0888
																						101.959

## Sheet: Figure 3B
UM				LIS
Bardex	Dover	Silicone		Bardex	Dover	Silicone
93.5102	81.4639	72.8664		0.220681	7.70197	0.093546
83.8296	98.7242	98.7625		0.200825	14.4092	0.357527
118.58	100.728	109.281		7.33005	2.63836	0.289546
104.08	119.084	119.09		0.359766	6.27732	0.210622
124.055	99.0152	72.3541		0.394177	4.92526	0.628734
79.127	86.733	134.897		1.08153	8.40904	0.752688
108.553	119.409	92.7491		1.27564	3.20513	0.894553
88.2653	94.8425			0.702194	49.6112	0.207838

## Sheet: Figure 3C
EF			EC			KP			PA			AB			CA
UM	LI		UM	LI		UM	LI		UM	LI		UM	LI		UM	LI
124.49	0.063153		102.619	0.430995		106.73	65.7506		106.829	27.2312		75.7682	1.48448		125.122	111.707
66.4582	-0.0875		100.566	0.976292		122.915	33.5471		108.932	22.3053		113.94	1.12864		93.3185	69.0429
109.051	0.362923		100.688	0.63906		67.6752	16.2565		93.3706	20.7354		109.882	1.61429		105.172	61.1025
117.415	0.243416		96.1267	0.148482		102.68	28.4752		90.8681	32.6638		100.41	-0.14398		76.3872	59.6193
80.4804	3.17353		112.599	0.598661		73.0165	46.4215		106.539	24.9124		97.8589	0.928886		107.39	89.624
102.781	-2.21071		106.871	0.664756		75.2645	24.2403		98.4101	31.6821		101.122	3.58003		81.9306	63.4369
99.3239	-2.86881		115.011	2.34536		163.625	33.3682		103.753	20.632		106.6	-0.70678		84.3903	68.2506
65.5192	-3.4973		65.5187	1.12525		88.094	32.3047		91.2981	28.9105		94.4193	3.33466		126.289	1.41563
85.4175	3.83815		97.1036	5.44204		89.4903	13.122		97.856	23.0757		140.083	0.193569		84.8729	34.9395
175.138	29.0965		93.6332	0.970137		137.785	10.2648		77.7293	28.0332		77.8368	-1.46398		78.9757	23.928
73.9248	2.50537		184.81	-1.85855		37.1606	14.7599		115.416	31.8658		111.754	-0.42763		118.93	42.9764
	2.97097		24.4537			135.564	9.67545		108.999	29.4884		70.3257	1.10005		117.221	21.7807
						78.6372	153.065					110.796	9.30616
						90.2549	20.2269					88.9088	5.03879
						128.317	-3.895					102.05	14.324
						102.791	-31.4038					98.2448	0.435257

## Sheet: Figure 4 CFUs
CFUs/1mL of organ or catheter
E. faecalis OG1RF											E. coli UTI89											K. pneumoniae TOP52											P. aeruginosa PA01											A. baumannii UPAB
Unmodified Catheter					LIS Catheter						Unmodified Catheter					LIS Catheter						Unmodified Catheter					LIS Catheter						Unmodified Catheter					LIS Catheter						Unmodified Catheter					LIS Catheter
Bladder	Catheter	Kidney	Spleen	Heart	Bladder	Catheter	Kidney	Spleen	Heart		Bladder	Catheter	Kidney	Spleen	Heart	Bladder	Catheter	Kidney	Spleen	Heart		Bladder	Catheter	Kidney	Spleen	Heart	Bladder	Catheter	Kidney	Spleen	Heart		Bladder	Catheter	Kidney	Spleen	Heart	Bladder	Catheter	Kidney	Spleen	Heart		Bladder	Catheter	Kidney	Spleen	Heart	Bladder
1550000	850000	50	50	50	21500	14500	70000	50	50		200000	400000	50	50	50	800	50	50	50	50		550000	5000000	55000	200000	130000	37000000	55000	4500	50	50		2450000	450000	9000	50	50	270000	350000	50	50	50		100	235000	30500	50	50	40000
4000000	400000	50	50	50	8000	60000	50	50	50		12500	950000	100000	50	50	65000	50	50	50	50		155000	700000	170000	33500	850	11000	300000	600	50	50		1950000	14500000	700000	50	50	65000	80000	50	50	50		1050000	7000	190000	50	50	1550
8000000	140000	50	60000	50	950000	350000	35000	150	11000		90000	100000	50	50	50	1650	1700000	50	50	50		45000	4500000	2650000	23500	4000	4000	50	125000	50	50		5500000	350000	50	50	50	700000	230000	50	50	50		195000	50	185000	50	50	50
13500000	1150000	50	600	50	80000	900000	50	300000	3000		2600000	3400000	7500	50	50	250000	900000	100	50	50		750000	1950000	1550	2100	1050	7500	50	50	50	50		1900000	230000	50	50	50	140000	1650	50	50	50		400000	65000	250	50	50	200000
2000000	8500	500000	300	50	5500000	30000	15000	20000	50		44500000	110000	145000	50	50	37000	7500	400	50	50		2450000	7000	1000	4500	1050	25000	50	50	50	50		1600000	2000000	50	100	50	17500	25500000	50	50	50		15000000	350000	4500	250	200	200
950000	2500000	50	50	50	1250000	1500	85000	50	50		295000	45000	350	50	50	24500	15500	50	50	50		350000	8500	1350	450	950	4000	50	50	50	50		1950000	8500000	50	50	50	13500	275000	50	50	50		250000	300	150	50	50	35000
80000	600000	50	50	50	1450000	400000	105000	50	50		900000	270000	28000000	24500	50	5500	50	50	50	50		450000	70000	700	650	1200	1950		3000	7000	50		115000	1050000	50	50	50	225000	3000	50	50	50		1450000		16500000	350000	4000	50
4000000	850000	55000	50	50	1250000	45000	35000	50	50		15500000	360000	115000	105000	50	8500000	200	50	50	50		13500000	2050	1100	200	800	3150		185000	550000	1600		380000	1450000	50	50	50	650000	20000	50	50	50		60000		300000	200	50	300
650000	6000	2500	50	50	12000	8500	15000	50	50		650000	2850000	95000	4250	50	14000000	350	50	50	50		135000		150	350	350	100		2600	5500	50		2000000		50	50	50	1650000	9500	50	100	50		50		165000	350	550	50
750000	175000	750000	50	50	50000	3150	400	50	50		800000		60000	4000	50	1050000		29000000	150	50		18000		23500000	14000	300	8500		150	50	50		9000000		50	50	50	385000		50	50	50		400		10500	10500	500	50
6000000	115000	50	50	50	6000	14500	50	50	50		4350000		195000	1450	50	5000		600000	50	50		13500		550	750	50			50	50	50		900000		50	50	50	4500		50	50	50		900		35000	50	50
200000	750000	50	50	50	7500000	60000	50	50	50		2100000		9500	50	50	60000		105000	50	50		90000		160000	2800	50			50	50	50		1150000		50	50	50	100000		50	50	50				6500	50	50
1200000		50	50	50	75000	350000	7000	50	50		17500000		7000000	500	50	90000		50	50	50		135000		500000	50	50							140000		470000	50	50	50000		50	50	50				50	50	50
650000		50	50	50	9000	15500	1000000	50	50		7000000		1600	350	50	40000		15000	50	50		1350		50	50	50							700000		2150	50	50
1550000		50	50	50	55000	17000	50	50	50				34500000	80000	1350			80000	50	50		125000		100	50	50							350000		400000	50	50
29000		50	5000	650	80000	5500	50	50	50				150000	29000	250			50	50	50		150000		100	50	50							14000000		50	50	50
1750000		200000	50	50	170000	15500	50	50	50															130000	50	50							650000000		55000	3550	50
225000		50			300000	20000	100	50	50															50	50	50									2800	2700	300
2100000		50			300000	14500	50	50	50															110000	50	50									650000	2400	400
		1200			21500	50	50	50	50															275000	50	50									2750000	230000	150
		13000			8000	30500	50	50	50																										400000000	1500000	3150000
		18000			950000	3500	50	50	50
					1800000	14500	50	50	50
					9000000		415000	50	50
					1350		50	50	50
					175000		50	50	50
					900000		50	50	50
					2650000		50
					80000		600000
					245000		50
					10500		50
					1100000		2500
[truncated: 14 more columns]

## Sheet: Supplemental Figure 2A
	Tube weight in grams
Time (Hours)	1	2	3	4	5
0	0.5722	0.5775	0.5743	0.6045	0.5799
3	0.7227	0.7276	0.7679	0.7414	0.7288
6	0.8063	0.8197	0.8089	0.808	0.853
20.5	0.9883	1.0517	0.9957	1.0091	1.0145
23.5	1.068	1.0325	1.0144	1.0235	1.0163
26.5	1.0546	1.0924	1.0375	1.036	1.045
29.5	1.0536	1.0637	1.0486	1.0723	1.1129
46.5	1.0835	1.1551	1.1004	1.1003	1.118
52.5	1.105	1.1551	1.1004	1.1003	1.118
68.5	1.1107	1.1359	1.1153	1.185	1.1194
74.5	1.1037	1.1761	1.115	1.1343	1.1259
95	1.1137	1.1232	1.1915	1.1317	1.1463
101	1.1431	1.14	1.1195	1.1168	1.1859
119	1.1235	1.1851	1.147	1.134	1.1297
142.5	1.1381	1.1502	1.125	1.1959	1.1355

## Sheet: Supplemental Figure 2B
	Tube weight in grams
Time (Hours)	1	2	3	4	5
0	0.9506	0.9839	1.0718	0.9831	1.0604
3	1.0972	1.0224	0.9859	1.1213	1.0313
6	0.9818	1.0167	1.0098	1.1094	1.0966
20.5	0.9701	1.1045	1.0219	1.0917	1.0206
23.5	1.0172	1.0885	1.0093	0.9679	1.1036
26.5	1.1151	1.0373	1.0986	1.019	0.9921
29.5	1.1142	1.0125	1.0258	0.9862	1.1018
46.5	1.109	1.0139	1.0958	0.9806	1.0187
52.5	1.0245	1.1138	1.0213	1.1056	0.9844
68.5	1.0154	1.1048	0.9866	1.1041	1.0109
74.5	1.0787	0.9634	1.0021	1.0935	0.9925
95	1.0155	0.9905	1.0779	0.9718	1.1124
101	0.9976	1.0188	1.0673	1.0875	0.9755
119	1.0566	0.993	0.9925	1.0736	0.9535
142.5	1.0755	1.0722	0.9558	0.9903	0.9896

## Sheet: Supplemental Figure 2C
	Tube weight in grams
Time (Min)	1	2	3	4	5
0	0.0046	0.0046	0.0044	0.0047	0.0046
1	0.0068	0.0061	0.0061	0.0063	0.0059
2	0.0075	0.0069	0.0067	0.0075	0.0066
3	0.0079	0.0075	0.0076	0.008	0.0074
4	0.0084	0.0079	0.0078	0.0084	0.0081
5	0.0092	0.0085	0.0084	0.0093	0.0084
7	0.0093	0.0085	0.0091	0.0096	0.0088
9	0.0095	0.009	0.0089	0.0102	0.0089
11	0.0094	0.0093	0.009	0.0101	0.0084
13	0.0094	0.009	0.0091	0.0101	0.0089
15	0.0096	0.0094	0.0095	0.0103	0.0084
20	0.0093	0.0093	0.0095	0.0102	0.0086
25	0.0095	0.0096	0.0095	0.0106	0.0088
30	0.0097	0.0099	0.0097	0.0106	0.0095

## Sheet: Supplementary Figure 2D
	Tube Weight% increase
Time (Hours)	Tygon Tube					Silicone Tube
0	0	0	0	0	0	0	0	0	0	0
3	15.4218	3.913	-8.01455	14.0576	-2.74425	26.302	25.9913	33.7106	22.6468	25.6768
6	3.28214	3.33367	-5.78466	12.8471	3.41381	40.9123	41.9394	40.8497	33.6642	47.0943
20.5	2.05134	12.2573	-4.65572	11.0467	-3.7533	72.7193	82.1125	73.3763	66.9313	74.944
23.5	7.0061	10.6312	-5.83131	-1.54613	4.07393	86.648	78.7879	76.6324	69.3135	75.2544
26.5	17.3049	5.42738	2.50047	3.65171	-6.44097	84.3062	89.1602	80.6547	71.3813	80.2035
29.5	17.2102	2.9068	-4.29185	0.315329	3.90419	84.1314	84.1905	82.5875	77.3863	91.9124
46.5	16.6632	3.04909	2.23922	-0.2543	-3.93248	89.3569	100.017	91.6072	82.0182	92.7919
52.5	7.77404	13.2026	-4.7117	12.4606	-7.16711	93.1143	100.017	91.6072	82.0182	92.7919
68.5	6.81675	12.2878	-7.94924	12.308	-4.66805	94.1105	96.6926	94.2016	96.0298	93.0333
74.5	13.4757	-2.08355	-6.50308	11.2298	-6.40324	92.8871	103.654	94.1494	87.6427	94.1542
95	6.82727	0.6708	0.569136	-1.14943	4.90381	94.6347	94.4935	107.47	87.2126	97.672
101	4.94425	3.54711	-0.41985	10.6195	-8.00641	99.7728	97.4026	94.933	84.7477	104.501
119	11.1509	0.924891	-7.39877	9.20557	-10.0811	96.3474	105.212	99.7214	87.5931	94.8094
142.5	13.1391	8.97449	-10.8229	0.732377	-6.67673	98.899	99.1688	95.8906	97.8329	95.8096

## Sheet: Supplementary Figure 2E
	Tube weight % increase
Time (Hours)	1	2	3	4	5
0	0	0	0	0	0
1	47.8261	32.6087	36.9565	34.7826	28.2609
2	63.0435	50	50	60.8696	43.4783
3	71.7391	63.0435	69.5652	71.7391	60.8696
4	82.6087	71.7391	73.913	80.4348	76.087
5	100	84.7826	86.9565	100	82.6087
7	102.174	84.7826	102.174	106.522	91.3043
9	106.522	95.6522	97.8261	119.565	93.4783
11	104.348	102.174	100	117.391	82.6087
13	104.348	95.6522	102.174	117.391	93.4783
15	108.696	104.348	110.87	121.739	82.6087
20	102.174	102.174	110.87	119.565	86.9565
25	106.522	108.696	110.87	128.261	91.3043
30	110.87	115.217	115.217	128.261	106.522

[truncated: 3 more sheets: Supplemental Figure 2F, Supplemental Figure 2G, Supplemental Figure 3]
