# Supplementary material for: Inhibiting host-protein deposition on urinary catheters reduces associated urinary tract infections
Source: eLife. 2022 Mar 29;11:e75798. doi: 10.7554/eLife.75798 (PMC8986317; doi:10.7554/eLife.75798)
Supplement: Supplementary file 1. — The average number of peptides for each protein found on 10 mouse catheters sorted by greatest abundance on the UM-catheter. [file elife-75798-supp1.xlsx]

## Sheet: Sheet1
WT strain	Growth Conditions	Inoculum	Primary Antibody	Reference
		CFU/mL
E. faecalis OG1RF	24hr in BHI	1x107	Rabbit anti-Streptococcus group D antigen	(Flores-Mireles, Pinkner, Caparon, & Hultgren, 2014)
E. coli UTI89 HK::GFP	2x24hr in LB	1x107	Rabbit anti- E. coli Serotype O/K (ThrmoSci PA1-25636)	(Westfall et al., 2019)
P. aeruginosa PA01 PKA	2x24hr in LB	1x107	Rabbit anti- Pseudomonas (ThermoSci PA1-73116)	(Berger et al., 2014)
A. baumanii UPAB1	2x24hr in LB	1x108	Rabbit anti- A. baumannii	(Di Venanzio et al., 2019)
K. pneumoniae TOP52	2x24hr in LB	1x107	Rabbit anti- K. pneumoniae (ThermoSci PA1-7226)	(Rosen et al., 2008)
C. albicans SC3415	24hr in YPD	1x107	Rabbit anti- C. albicans (ThrmoSci PA1-2158)	(Baron et al., 2020)
