# Supplementary material for: Inhibiting host-protein deposition on urinary catheters reduces associated urinary tract infections
Source: eLife. 2022 Mar 29;11:e75798. doi: 10.7554/eLife.75798 (PMC8986317; doi:10.7554/eLife.75798)
Supplement: Supplementary file 2. — List of microbial strains and their corresponding growth conditions, inoculum concentrations, and antibodies used in this study [file elife-75798-supp2.xlsx]

## Sheet: SIT1
Protein IDs	Protein names	UM Average Intensity		Stdev	LI Average Intensity		St DEV	Fold Change
P07724	Serum albumin	15482137500	±	6.44223e+09	1648310000	±	8.27314e+08	0.106465
Q91VB8;P01942	Hemoglobin subunit alpha	4506767500	±	6.98548e+09	701998920	±	1.24358e+09	0.155766
A8DUK4;P02088;E9Q223;P02089;CON__Q3SX09;CON__P02070;P02104	Hemoglobin subunit beta-1	4035360000	±	6.43667e+09	680172920	±	1.17255e+09	0.168553
P62806	Histone H4	2334659875	±	3.48219e+09	147080800	±	1.62692e+08	0.0629988
P63260;P60710;E9Q5F4;G3UZ07;E9Q1F2;G3UYG0;E9Q606;A0A1D5RM20;B1ATY1;Q8BFZ3;F8WGM8;E9Q2D1;F6WX90;V9GXQ2	Actin, cytoplasmic 2;Actin, cytoplasmic 2, N-terminally processed;Actin, cytoplasmic 1;Actin, cytoplasmic 1, N-terminally processed	2165261250	±	3.0998e+09	298366600	±	2.69349e+08	0.137797
Q921I1;D3YYR8;F7BAE9;E9Q2Q7;F7CJN9;E9Q939;CON__Q29443;CON__Q0IIK2;CON__Q2HJF0	Serotransferrin	2060670000	±	1.22854e+09	105313600	±	5.79624e+07	0.0511065
P31725	Protein S100-A9	1446638500	±	2.04766e+09	79706310	±	1.39309e+08	0.0550976
Q8CBB6;Q8CGP2;Q8CGP1;Q6ZWY9;Q64525;Q64478;Q64475;P10854;P10853;P70696;Q9D2U9;Q8CGP0;Q64524	Histone H2B;Histone H2B type 1-P;Histone H2B type 1-K;Histone H2B type 1-C/E/G;Histone H2B type 2-B;Histone H2B type 1-H;Histone H2B type 1-B;Histone H2B type 1-M;Histone H2B type 1-F/J/L;Histone H2B type 1-A;Histone H2B type 3-A;Histone H2B type 3-B;Histone H2B type 2-E	1286724125	±	1.69541e+09	145742450	±	2.05734e+08	0.113266
A2CEK7		1129369750	±	1.62316e+09	274153500	±	1.75205e+08	0.242749
P22599	Alpha-1-antitrypsin 1-2	1006863750	±	5.63313e+08	118133600	±	6.00269e+07	0.117328
Q00623;A0A1L1STX7;CON__P15497	Apolipoprotein A-I;Proapolipoprotein A-I;Truncated apolipoprotein A-I	913043750	±	2.48833e+08	91573200	±	6.73877e+07	0.100294
A0A0N4SV66;Q8CGP4;C0HKE9;C0HKE8;C0HKE7;C0HKE6;C0HKE5;C0HKE4;C0HKE3;C0HKE2;C0HKE1;Q8CGP6;Q8R1M2;Q8CGP7;Q8CGP5;Q8BFU2;Q64523;Q6GSS7;P27661;Q64522;G3UWL7	Histone H2A;Histone H2A type 1-H;Histone H2A.J;Histone H2A type 1-K;Histone H2A type 1-F;Histone H2A type 3;Histone H2A type 2-C;Histone H2A type 2-A;Histone H2AX	797786750	±	1.07359e+09	83346300	±	7.59116e+07	0.104472
A0A1W2P768;P84228;P68433;F8WI35;P84244;P02301;E0CZ27;E0CYN1;E0CYR7	Histone H3.2;Histone H3.1;Histone H3;Histone H3.3;Histone H3.3C	748601375	±	1.10827e+09	78019600	±	8.82377e+07	0.10422
P01027;H3BKW9;H3BL60;CON__Q2UVX4	Complement C3;Complement C3 beta chain;C3-beta-c;Complement C3 alpha chain;C3a anaphylatoxin;Acylation stimulating protein;Complement C3b alpha chain;Complement C3c alpha chain fragment 1;Complement C3dg fragment;Complement C3g fragment;Complement C3d fragment;Complement C3f fragment;Complement C3c alpha chain fragment 2	580996250	±	2.8428e+08	83881850	±	9.68034e+07	0.144376
Q91X72;A0A1B0GS57	Hemopexin	501968750	±	4.60305e+08	23420730	±	3.02326e+07	0.0466577
P15864;P43277;I7HFT9;Q07133	Histone H1.2;Histone H1.3	4.8714e+08	±	6.73694e+08	75362730	±	1.27482e+08	0.154704
P27005	Protein S100-A8	451985125	±	8.80304e+08	1673360	±	3.74175e+06	0.00370225
P08071;A0A0G2JDN0;A0A0G2JGN1;A0A0G2JFM6;A0A0G2JEA3	Lactotransferrin	4.04402e+08	±	6.87157e+08	20498905	±	4.03643e+07	0.0506894
P10107;A0A494BBD8	Annexin A1	376866275	±	6.37443e+08	9788190	±	1.55714e+07	0.0259726
O08692	Neutrophilic granule protein	370222625	±	5.22858e+08	73296500	±	1.26757e+08	0.19798
A0A0R4J0I1;P07759;Q80X76	Serine protease inhibitor A3K	366840625	±	3.16759e+08	12660080	±	1.07761e+07	0.0345111
O35744;F6RU51	Chitinase-like protein 3	332948175	±	5.41322e+08	6337940	±	1.06917e+07	0.0190358
A2BIN1;Q4FZE8;A2AKN9;A2BIM8;P02762;P04938;A9C497;A9C496	Major urinary protein 6;Major urinary proteins 11 and 8	325390500	±	4.84141e+08	11190320	±	8.2354e+06	0.0343904
Q61838;D3YUI3;Q6GQT1	Alpha-2-macroglobulin;Alpha-2-macroglobulin 165 kDa subunit;Alpha-2-macroglobulin 35 kDa subunit	323105500	±	3.9544e+08	11569840	±	1.07611e+07	0.0358082
A0A0R4J0X5;A0A0A0MQA3;Q00896;P07758	Alpha-1-antitrypsin 1-3;Alpha-1-antitrypsin 1-1	258148000	±	1.41451e+08	26833370	±	2.02608e+07	0.103946
E9PV24;CON__P02672	Fibrinogen alpha chain;Fibrinopeptide A;Fibrinogen alpha chain	239793750	±	1.79713e+08	45901800	±	6.78086e+07	0.191422
P40142;A0A286YE28;E0CY51	Transketolase	237295450	±	3.66823e+08	13605310	±	1.43348e+07	0.0573349
S4R1W1;P16858;A0A1D5RLD8;A0A0A0MQF6;S4R257;S4R1W8;V9GX06;A0A0R4J0X7;S4R2G5;Q64467;S4R1N5;V9GXK0	Glyceraldehyde-3-phosphate dehydrogenase	231480500	±	3.87366e+08	21754920	±	2.34832e+07	0.0939817
Q8K0E8	Fibrinogen beta chain;Fibrinopeptide B;Fibrinogen beta chain	230080250	±	2.29079e+08	54102690	±	8.34324e+07	0.235147
Q91X17;A0A140LI10	Uromodulin;Uromodulin, secreted form	220658250	±	2.52659e+08	267312580	±	4.9804e+08	1.21143
P07309	Transthyretin	214036500	±	1.00958e+08	23895620	±	3.05956e+07	0.111643
Q8VDD5;Q5SV64;Q3UH59;Q61879;A0A2R8VKI5;Q8BXF2;A0A140LI60;E9Q264;A2AQP0	Myosin-9	2.13816e+08	±	3.42623e+08	22755000	±	2.70759e+07	0.106424
P11247;F7DC05;F8WGZ9;A0A0A0MQL9	Myeloperoxidase;Myeloperoxidase light chain;Myeloperoxidase heavy chain	210838125	±	3.56847e+08	8283660	±	1.67486e+07	0.0392892
Q3UER8;Q8VCM7	Fibrinogen gamma chain	204925625	±	1.97908e+08	13311600	±	2.29425e+07	0.0649582
A2AE89;P10649;F6WHQ7;P19639;D3YVP6;E9QAC8;D3YVP5;Q80W21;F6Y363;D3YZ29;D3YVP8;G5E8M7;O35660;D3YVP9;E9PV63;E9PVM7;P48774	Glutathione S-transferase Mu 1	202346250	±	4.86988e+07	404021700	±	3.82064e+08	1.99668
Q61233;A0A1C7CYV0;B1AX58;Q99K51;D3YZ25;D3YVW8;D3Z7D9;D3Z311;Q3V0K9	Plastin-2	1.90217e+08	±	3.13364e+08	5366582	±	1.0504e+07	0.028213
P10126;D3Z3I8;D3YZ68;P62631	Elongation factor 1-alpha 1;Elongation factor 1-alpha 2	189009250	±	2.61642e+08	71060360	±	7.2653e+07	0.375962
P20152;A0A0A6YWC8;A2AKJ2;P31001;D3YZ35;A0A0R4J036;P46660;P08551;P08553	Vimentin	181309225	±	3.09607e+08	3707000	±	8.2891e+06	0.0204457
A6BLY7	Keratin, type I cytoskeletal 28	173271500	±	5.2011e+07	172311700	±	7.44363e+07	0.994461
P52480;A0A1L1SU37;A0A1L1SQV8;A0A1L1SUV0;A0A1L1SSN6;A0A1L1STV8;A0A1L1ST52;A0A1L1SVH2;E9Q509;G3X925;P53657	Pyruvate kinase PKM	1.68132e+08	±	2.59614e+08	38898800	±	5.37304e+07	0.231359
O89053;G3UYK8;A0A0U1RPY8;D3YW57;G3UX53;D3YXM2	Coronin-1A;Coronin	163965350	±	2.39955e+08	4382720	±	9.13756e+06	0.0267295
P13020;A0A0J9YUQ8;CON__Q3SX14;A6PWS5;A0A0J9YUJ8	Gelsolin	160516625	±	1.22643e+08	38711140	±	4.03319e+07	0.241166
Q3UV17;CON__Q7RTS7;CON__Q32MB2	Keratin, type II cytoskeletal 2 oral	140066500	±	5.01194e+07	139166000	±	7.52742e+07	0.993571
P28665;P28666;A0A0N4SVU1;CON__ENSEMBL:ENSBTAP00000024146	Murinoglobulin-1	134174125	±	1.59047e+08	2957230	±	2.70619e+06	0.0220402
B7FAV1;B7FAU9;Q8BTM8;F6XC15;Q8VHX6;F6Z2C0;J3JS91	Filamin-A	132000175	±	2.29394e+08	3076400	±	4.65093e+06	0.023306
P21614;A0A0G2JGM6	Vitamin D-binding protein	128607375	±	6.14858e+07	5302900	±	4.91027e+06	0.0412332
P23953;D3Z5G7;A0A1D5RM42;Q8VCT4;E9PYP1;Q8VCC2	Carboxylesterase 1C	123547125	±	8.71733e+07	9852670	±	7.3467e+06	0.0797483
F8WGL3;P18760;A0A494B9A7	Cofilin-1	122635475	±	1.79556e+08	16145180	±	1.6382e+07	0.131652
H3BJQ7;P99029;A0A494BAZ4;G3UZJ4	Peroxiredoxin-5, mitochondrial	114494675	±	1.86561e+08	9794770	±	9.52133e+06	0.0855478
P11679;CON__Q9H552	Keratin, type II cytoskeletal 8	112534375	±	5.17015e+07	114881460	±	1.07777e+08	1.02086
P01132;A0A0G2JDT8;A0A0G2JF92;A0A0G2JFB8	Pro-epidermal growth factor;Epidermal growth factor	111105950	±	1.81901e+08	14300294	±	1.64531e+07	0.128709
P62962;Q5SX49;CON__P02584	Profilin-1;Profilin	110464150	±	2.07991e+08	3825423	±	5.10912e+06	0.0346304
D3YTY9;A0A0R4J038;O08677;D3Z2B2	Kininogen-1;Kininogen-1 heavy chain;Bradykinin;Kininogen-1 light chain	108695625	±	8.06461e+07	8454290	±	1.08334e+07	0.0777795
P26041;Q7TSG6	Moesin	108181475	±	1.96548e+08	236990	±	529926	0.00219067
P99024;Q9CWF2;Q7TMM9;P68372;Q9D6F9;Q922F4;Q9ERD7;CON__ENSEMBL:ENSBTAP00000025008;A2AQ07;G3UZR1;A0A1D5RM76	Tubulin beta-5 chain;Tubulin beta-2B chain;Tubulin beta-2A chain;Tubulin beta-4B chain;Tubulin beta-4A chain;Tubulin beta-6 chain;Tubulin beta-3 chain	105154250	±	1.74858e+08	11919590	±	1.19938e+07	0.113353
Q504P4;P63017;D3Z5E2	Heat shock cognate 71 kDa protein	1.02959e+08	±	1.66137e+08	17502360	±	1.88898e+07	0.169994
P14069	Protein S100-A6	100653000	±	3.44329e+07	202632000	±	2.107e+08	2.01317
P06745;A0A0U1RQ72;A0A0U1RP97;CON__Q3ZBD7;A0A0U1RQ18	Glucose-6-phosphate isomerase	99871225	±	1.67466e+08	3666650	±	5.60697e+06	0.0367138
P07356;B0V2N8;B0V2N7;B0V2N5	Annexin A2;Annexin	9.76615e+07	±	1.62279e+08	6090880	±	4.97048e+06	0.0623672
Q9D154;Z4YK03;Q8VHP7;Q5SV42	Leukocyte elastase inhibitor A	9.24607e+07	±	1.51369e+08	5203020	±	8.45588e+06	0.0562728
A0A1B0GSR9;A0A1B0GSX0;P06151;A0A1B0GSL7;A0A1B0GT41;A0A1B0GQX5;D3YZQ9;A0A1B0GRW9;A0A1B0GS79;A0A1B0GRC1;A0A1B0GRS2;A0A1B0GSR2;D3YVR7;D3YZE4;A0A1B0GRE9;P00342	L-lactate dehydrogenase A chain;L-lactate dehydrogenase	88994550	±	1.4629e+08	14816210	±	1.44863e+07	0.166484
Q9DCD0	6-phosphogluconate dehydrogenase, decarboxylating	83828925	±	1.33796e+08	7424240	±	1.02598e+07	0.0885642
P68373;P05213;A0A2R8VHF3;Q9JJZ2;Q3UX10	Tubulin alpha-1C chain;Tubulin alpha-1B chain;Tubulin alpha-8 chain	83114575	±	1.24133e+08	14953887	±	1.42514e+07	0.179919
P08905;P17897	Lysozyme C-2;Lysozyme C-1	82159775	±	1.32927e+08	4909170	±	8.4138e+06	0.0597515
Q00897	Alpha-1-antitrypsin 1-4	81186875	±	4.60748e+07	4276501	±	5.06692e+06	0.0526748
P09411;S4R2M7;P09041	Phosphoglycerate kinase 1;Phosphoglycerate kinase	81046500	±	1.46335e+08	1270860	±	1.19054e+06	0.0156806
Q61646	Haptoglobin;Haptoglobin alpha chain;Haptoglobin beta chain	78553250	±	8.16938e+07	23471910	±	3.93637e+07	0.298803
Q05144;A0A2R8VHH0	Ras-related C3 botulinum toxin substrate 2	7.73232e+07	±	1.13487e+08	3553104	±	6.03958e+06	0.0459514
P17182;Q6PHC1;B1ARR7;B0QZL1;A0A0N4SUI6;B1ARR6;Q5SX61;Q5SX60;D3YVD3;D3Z2S4;J3QPZ9;Q5SX59;D3Z6E4;A0A0N4SUX5;P17183	Alpha-enolase	76852150	±	1.18847e+08	7012560	±	1.06283e+07	0.0912474
P20918;CON__P06868	Plasminogen;Plasmin heavy chain A;Activation peptide;Angiostatin;Plasmin heavy chain A, short form;Plasmin light chain B	73086500	±	4.72166e+07	4895400	±	6.93059e+06	0.0669809
P43276	Histone H1.5	72316660	±	1.16233e+08	3371381	±	5.19214e+06	0.0466197
B7ZNJ1;A0A087WS56;B9EHT6;A0A087WSN6;Q3UHL6;A0A087WR50;P11276;Q4KL80;A0A087WSU6;A0A087WS99	Fibronectin;Anastellin	71903500	±	7.18451e+07	2774160	±	4.23009e+06	0.0385817
P30681;A0A1B0GQX9	High mobility group protein B2	71019375	±	1.14275e+08	0	±	0	0
G3X9T8;G3X8Q5;E9PZD8;Q61147;G3UXG1;G3UWP5;G3UZ53	Ceruloplasmin	67425250	±	6.27597e+07	1200725	±	1.74796e+06	0.0178082
Q3UP87	Neutrophil elastase	61447175	±	7.1497e+07	3849980	±	6.78988e+06	0.0626551
P20065	Thymosin beta-4;Hematopoietic system regulatory peptide	61396900	±	6.56772e+07	23414420	±	2.73063e+07	0.381362
Q62266;Q62267	Cornifin-A	61093825	±	3.2613e+07	345931220	±	4.68319e+08	5.66229
P29699;A0A338P703;A0A338P7G1;A0A338P7H5;A0A338P692;A0A338P6Y6;CON__P12763	Alpha-2-HS-glycoprotein	60708000	±	7.73352e+07	4584060	±	6.48476e+06	0.07551
Q8C253;P16110	Galectin;Galectin-3	5.9703e+07	±	9.99508e+07	4474460	±	4.11725e+06	0.0749453
P24527	Leukotriene A-4 hydrolase	59087840	±	1.02042e+08	1052260	±	1.47716e+06	0.0178084
P06728	Apolipoprotein A-IV	59064875	±	2.97882e+07	3970604	±	4.595e+06	0.0672245
P17742;A0A1L1SST0;V9GXC1;V9GX31	Peptidyl-prolyl cis-trans isomerase A;Peptidyl-prolyl cis-trans isomerase A, N-terminally processed	55668850	±	7.54607e+07	6585680	±	1.11958e+07	0.118301
P05064;A6ZI44;Q9CPQ9;A6ZI46;D3Z510;A0A0U1RPN8;D3YWI1;D3YV98;A0A0U1RPT5;A6ZI47	Fructose-bisphosphate aldolase A;Fructose-bisphosphate aldolase	5.55409e+07	±	7.33988e+07	11385152	±	1.1432e+07	0.204987
Q5FW60	Major urinary protein 20	55218875	±	9.15219e+07	2150220	±	3.02026e+06	0.0389399
E9Q604;G5E8F1;E9Q5K8;Q3U1U4;P05555;A0A0R4J1B4	Integrin alpha-M	5.36426e+07	±	1.00861e+08	760420	±	1.70035e+06	0.0141757
P32261;A0A0A6YWH7;CON__P41361;A0A0A6YXS8;A0A0A6YX49;A0A0A6YX70	Antithrombin-III	52226875	±	2.88032e+07	5580070	±	3.17461e+06	0.106843
P58252;G3UXK8;G3UZ34;A2AH85;O08810	Elongation factor 2	5.00747e+07	±	6.95635e+07	22064160	±	2.88654e+07	0.440625
P09528;A0A494BA92;A0A494B9D4;A0A494BAP3	Ferritin heavy chain;Ferritin heavy chain, N-terminally processed	49269150	±	9.13033e+07	0	±	0	0
Q9JKF1;A0A0U1RNG5;Q3UQ44;A0A0U1RPU3;Q3UQP1;F8VQ29	Ras GTPase-activating-like protein IQGAP1	48847875	±	8.46125e+07	633186	±	1.13158e+06	0.0129624
Q9ET01;Q3UEJ6;E9PUM3	Glycogen phosphorylase, liver form;Alpha-1,4 glucan phosphorylase	48699125	±	8.4588e+07	3285900	±	4.47784e+06	0.0674735
Q542I8;P11835;M0QWA7;D3YYP8;D3Z1S4	Integrin beta;Integrin beta-2	4.84424e+07	±	7.65016e+07	2298200	±	5.13893e+06	0.0474419
O70456	14-3-3 protein sigma	48090575	±	4.99256e+07	76118230	±	9.57934e+07	1.58281
Q00612;A3KG36;Q836V0;G3UWD6;REV__P46662;P97324	Glucose-6-phosphate 1-dehydrogenase X;Glucose-6-phosphate 1-dehydrogenase	47381525	±	8.11859e+07	3660490	±	5.78797e+06	0.0772556
P26039;A2AIM2;E9PUM4;A0A1L1SQ51;Q8CDM9;Q71LX4;F6SX70;A0A1L1SRI1;F6S1V7;A0A1L1SQP9	Talin-1	47030500	±	7.80416e+07	2866040	±	5.33716e+06	0.06094
A1BN54;Q7TPR4	Alpha-actinin-1	4.52134e+07	±	8.63601e+07	0	±	0	0
P00920;A0A0A6YX78	Carbonic anhydrase 2	4.49565e+07	±	7.9764e+07	10545040	±	2.17149e+07	0.234561
Q06890;E9PUU2;E9PXG5;E9Q8Y5;E9Q9B8;E9Q2G2	Clusterin;Clusterin beta chain;Clusterin alpha chain	42552125	±	1.99642e+07	11403180	±	1.00681e+07	0.267981
P11499;E9PX27;E9Q3D6;D3Z1R1;E9Q0C3	Heat shock protein HSP 90-beta	4.2248e+07	±	7.04134e+07	13070500	±	1.9088e+07	0.309376
O88569;A0A0N4SUM2	Heterogeneous nuclear ribonucleoproteins A2/B1	42144790	±	7.68516e+07	543645	±	830820	0.0128995
Q9DBJ1;O70250	Phosphoglycerate mutase 1;Phosphoglycerate mutase 2	41794575	±	7.186e+07	1489195	±	2.10562e+06	0.0356313
P49290	Eosinophil peroxidase;Eosinophil peroxidase light chain;Eosinophil peroxidase heavy chain	41128500	±	6.70925e+07	0	±	0	0
P04919	Band 3 anion transport protein	3.98004e+07	±	7.8888e+07	5482100	±	1.22583e+07	0.13774
A0A2K6EDJ7;E9Q5L2;E9PVD2;A6X935;CON__Q3T052	Inter alpha-trypsin inhibitor, heavy chain 4	39519125	±	2.96149e+07	5007220	±	5.33117e+06	0.126704
Q9CVB6;D3YXG6;A0A087WRT2	Actin-related protein 2/3 complex subunit 2	3.94452e+07	±	6.4168e+07	1938015	±	2.87844e+06	0.0491319
D3Z2H9;E9Q5J9		39388000	±	6.69245e+07	231180	±	516934	0.0058693
O35639;Q3TET3;A0A0G2JDV9;A0A0G2JGL7	Annexin A3	39294525	±	6.66098e+07	2029232	±	2.50607e+06	0.0516416
A0A1B0GR11;Q93092	Transaldolase	39068300	±	6.34968e+07	2406926	±	3.0639e+06	0.0616082
A0A0G2JEU1;P47738;A0A0G2JF60;A0A0G2JFQ0;D3YYF3;Q62148;G3UWP3;P24549;Q9JHW9;Q9CZS1	Aldehyde dehydrogenase, mitochondrial	38918655	±	6.17527e+07	905930	±	2.02572e+06	0.0232775
P63101;A0A2I3BQ03;D3YXN6;D3YXF4;D3YW45	14-3-3 protein zeta/delta	3.84182e+07	±	5.30906e+07	20208180	±	2.17434e+07	0.526006
Q61176	Arginase-1	38315000	±	76630000	0	±	0	0
D3Z6F5;Q03265;Q831A3	ATP synthase subunit alpha;ATP synthase subunit alpha, mitochondrial	3.83049e+07	±	5.87848e+07	8708728	±	1.0169e+07	0.227353
P40124;B1ARS0;D3YTR7;A0A286YCS6;Q9CYT6	Adenylyl cyclase-associated protein 1	37748575	±	6.32349e+07	4227957	±	4.48942e+06	0.112003
A0A0A6YW67;E9Q9J0;E9Q4P0;E9Q5F6;E9QNP0;Q5SX22;P62984;P62983;P0CG49;P0CG50	Ubiquitin-60S ribosomal protein L40;Ubiquitin;60S ribosomal protein L40;Ubiquitin-40S ribosomal protein S27a;Ubiquitin;40S ribosomal protein S27a;Polyubiquitin-B;Ubiquitin;Polyubiquitin-C;Ubiquitin;Ubiquitin-related 1;Ubiquitin-related 2	3.74446e+07	±	4.92039e+07	19429580	±	1.92026e+07	0.518888
Q91Z25;Q9WV32;F6VVE6;D3Z6S0;F6THG2	Actin-related protein 2/3 complex subunit 1B	36260325	±	6.41157e+07	563140	±	1.25922e+06	0.0155305
P15947;A0A0U1RPN5;P15945;P00757;Q61759;P15946	Kallikrein-1	3.46678e+07	±	5.9455e+07	17467951	±	1.66546e+07	0.503867
Q3KQQ2;P04939;Q80YX8;P11590	Major urinary protein 3	3.44698e+07	±	4.78449e+07	11040740	±	1.26495e+07	0.320302
P08752;A0A0A6YWA9;B2RSH2;A2AE32;P20612;P18872;Q3V3I2;P50149;A2A610;A2AE31;Q8C040;D3Z2M7;Q8BHK8;F6QPU5;Z4YKV1;Q66L47;Q8CGK7;P63094;Q6R0H7	Guanine nucleotide-binding protein G(i) subunit alpha-2;Guanine nucleotide-binding protein G(i) subunit alpha-1	32204625	±	4.63459e+07	604720	±	1.11687e+06	0.0187774
P04117;A0A0A6YW05;A0A0A6YXB9;A0A0A6YXI2;P24526;O08716	Fatty acid-binding protein, adipocyte	32170250	±	2.35245e+07	57931740	±	8.79312e+07	1.80079
O88342;A0A0J9YU05	WD repeat-containing protein 1	31334050	±	5.01214e+07	7268290	±	7.48053e+06	0.231961
Q3THW5;P0C0S6;Q8R029;Q3UA95	Histone H2A.V;Histone H2A.Z;Histone H2A	30753350	±	4.79742e+07	1395940	±	3.12142e+06	0.0453915
P47791	Glutathione reductase, mitochondrial	30534500	±	4.99705e+07	1333835	±	2.30418e+06	0.0436829
Q9CPX4;A0A1B0GR60;P29391;A0A1B0GRH4;P49945;A0A1Y7VNT9	Ferritin;Ferritin light chain 1;Ferritin light chain 2	29925025	±	5.58165e+07	0	±	0	0
A0A0A6YW77;P11672	Neutrophil gelatinase-associated lipocalin	28537250	±	4.51229e+07	2750000	±	6.14919e+06	0.0963653
P08228	Superoxide dismutase [Cu-Zn]	2.78041e+07	±	3.83268e+07	18010160	±	1.82467e+07	0.647752
E9Q8I0;P06909;D6RGQ0;E9Q8H9;A0A0A6YWP4;A0A0A6YVP8	Complement factor H	27570625	±	9.09056e+06	1862451	±	2.61241e+06	0.067552
P17751;H7BXC3	Triosephosphate isomerase	2.68014e+07	±	4.15822e+07	11820760	±	1.21971e+07	0.44105
B1AXW5;B1AXW6;P35700;B1AXW4;B1AZS9;O08807	Peroxiredoxin-1	2.59144e+07	±	4.0584e+07	12471226	±	1.43068e+07	0.481246
Q9R0P5;P45591	Destrin	2.58401e+07	±	3.7588e+07	5775916	±	8.74972e+06	0.223525
E9PZF0;Q01768;Q5NC79	Nucleoside diphosphate kinase;Nucleoside diphosphate kinase B	2.57678e+07	±	4.14386e+07	888800	±	1.98742e+06	0.0344926
Q61599;D3YWL7;A0A0N4SVH4	Rho GDP-dissociation inhibitor 2	25639250	±	3.57934e+07	3457820	±	5.04703e+06	0.134864
Q9WVA4;A0A0A6YXG6;Q9R1Q8	Transgelin-2	2.55926e+07	±	4.46646e+07	1442860	±	2.40693e+06	0.0563781
P56480;Q831A5	ATP synthase subunit beta, mitochondrial	2.55629e+07	±	3.556e+07	4067810	±	6.61241e+06	0.159129
P59999;Q3TX55;E9PWA7	Actin-related protein 2/3 complex subunit 4	25551750	±	3.62324e+07	812870	±	1.27482e+06	0.0318127
P48036;A0A0G2JGQ0	Annexin A5	2.47473e+07	±	4.23103e+07	1229274	±	971570	0.0496731
P08249;A0A0G2JF23;A0A0G2JGY4	Malate dehydrogenase, mitochondrial	23907390	±	3.87362e+07	3135600	±	2.89822e+06	0.131156
A0A0R4J039;Q9ESB3;A0A338P6H8	Histidine-rich glycoprotein	2.38922e+07	±	1.26373e+07	4172824	±	6.45103e+06	0.174652
Q8R2S8	CD177 antigen	23878675	±	4.11142e+07	1797790	±	4.01998e+06	0.0752885
P45376;D3YVJ7	Aldose reductase	23739375	±	3.1704e+06	68150770	±	9.50478e+07	2.87079
Q99JI6;A0A0G2JDL9;P62835;A0A0G2JE52;A0A0G2JED9;A0A1W2P777	Ras-related protein Rap-1b;Ras-related protein Rap-1A	23381425	±	3.90389e+07	2964510	±	6.07704e+06	0.126789
A0A0J9YUZ4;P63158;A0A0J9YUD8;D3YVC6;D3YZ18	High mobility group protein B1	23188375	±	3.84891e+07	0	±	0	0
P08226;A0A1B0GX15;G3UWN5;G3UZM8	Apolipoprotein E	23160875	±	1.34797e+07	1640490	±	905237	0.0708302
P51881;P48962;Q3V132	ADP/ATP translocase 2;ADP/ATP translocase 2, N-terminally processed;ADP/ATP translocase 1	2.31151e+07	±	3.52596e+07	3295046	±	4.03087e+06	0.142549
Q5SW88;P62821;Q5SW87;A0A494BA38;A0A494BBL7;A0A494B945;Q9D1G1;Q5SW86	Ras-related protein Rab-1A;Ras-related protein Rab-1B	2.30339e+07	±	3.62362e+07	3813280	±	3.48541e+06	0.165551
P03953	Complement factor D	22859375	±	3.3878e+07	1542560	±	3.44927e+06	0.0674804
Q3UA72;Q9CPW4	Actin-related protein 2/3 complex subunit 5	22855400	±	3.76279e+07	1778140	±	2.08336e+06	0.0777996
Q01339;I7HJR3;CON__P17690	Beta-2-glycoprotein 1	2.26164e+07	±	1.48953e+07	521360	±	716013	0.0230523
Q543K9;P23492;A0A2I3BQH2;A0A2I3BS22;Q9D8C9	Purine nucleoside phosphorylase	22563225	±	4.19862e+07	2142440	±	3.45823e+06	0.0949527
Q99JY9;A0A087WS98;A0A087WP86;A0A087WQ14;A0A087WRA1;Q641P0;A0A087WQ83	Actin-related protein 3	2.19139e+07	±	3.58956e+07	858400	±	1.44719e+06	0.0391716
Q3UDS7;A0A1L1SSF2;Q8VDL4	ADP-dependent glucokinase	21640150	±	3.75151e+07	595480	±	1.33153e+06	0.0275174
F6TVP2;Q60710;E9PYG9	Deoxynucleoside triphosphate triphosphohydrolase SAMHD1	21001250	±	42002500	0	±	0	0
Q60590	Alpha-1-acid glycoprotein 1	2.09257e+07	±	3.36879e+07	0	±	0	0
Q61598;A0A1Y7VL99;A0A1Y7VLG4	Rab GDP dissociation inhibitor beta	2.06381e+07	±	3.49827e+07	2029460	±	2.49649e+06	0.0983358
Q9JM76;H7BWZ3;A0A0G2JFK7;D3Z2F7;D3Z2F8	Actin-related protein 2/3 complex subunit 3	20585375	±	3.15043e+07	829030	±	1.85377e+06	0.0402728
P24472;A0A1L1SS61	Glutathione S-transferase A4	20395025	±	6.18829e+06	91595000	±	9.35533e+07	4.49105
P10639	Thioredoxin	2.03152e+07	±	2.23487e+07	8858900	±	1.11947e+07	0.436073
P27773;F6Q404	Protein disulfide-isomerase A3	2.00482e+07	±	3.3566e+07	1538533	±	1.67303e+06	0.0767416
P51437	Cathelin-related antimicrobial peptide	19906050	±	2.87575e+07	9095360	±	1.92982e+07	0.456914
P19221;H7BX99;CON__P00735	Prothrombin;Activation peptide fragment 1;Activation peptide fragment 2;Thrombin light chain;Thrombin heavy chain;Prothrombin	1.98474e+07	±	1.55678e+07	2304895	±	3.4278e+06	0.116131
P61161	Actin-related protein 2	19846000	±	39692000	109526	±	244908	0.00551879
A0A0R4IZY6;Q61096;F6ZK01	Myeloblastin	1.96807e+07	±	3.17802e+07	2770870	±	4.7298e+06	0.140791
E9Q3Z4;Q3TRM8;E9Q8S8;D6RFA3;P52792	Hexokinase;Hexokinase-3	19245700	±	3.65591e+07	190290	±	425501	0.0098874
O88844;A0A087WPT4;A0A087WRS9;D3YVY3;A0A087WRM4;A0A0U1RP68;D6RIL6;P54071	Isocitrate dehydrogenase [NADP] cytoplasmic	1.82985e+07	±	2.25604e+07	16583990	±	1.67793e+07	0.906305
A0A1W2P6F6;A0A1W2P7Q9;Q60605;A0A1W2P6G5	Myosin light polypeptide 6	1.82977e+07	±	2.62028e+07	311620	±	696804	0.0170305
Q5ND35;Q61247;E9PXE0	Alpha-2-antiplasmin	1.8135e+07	±	1.6442e+07	0	±	0	0
P01898;A0A494B9G2;A0A0B4J1G3;A0A494B9G8;E9PWT4;E9QJR9;P79568;E9PX63;Q8HWB2;A0A494BA33;A0A494BAT0;Q3TH01;O19441;A7VMS6;E9Q0G4;G3UXE9;P01895;P14430;P14428;P14429;P14426;P01900;P03991;P04223;P01901	H-2 class I histocompatibility antigen, Q10 alpha chain	1.78988e+07	±	2.03921e+07	0	±	0	0
P07901;B7ZC50;A2A6A2;B7ZC49;REV__Q8BL66	Heat shock protein HSP 90-alpha	17684725	±	3.33207e+07	614886	±	971804	0.0347693
P51150;A0A0N4SVR6;A0A0N4SVG9	Ras-related protein Rab-7a	17588250	±	2.87258e+07	536475	±	751557	0.0305019
P01029	Complement C4-B;Complement C4 beta chain;Complement C4 alpha chain;C4a anaphylatoxin;Complement C4 gamma chain	1.74597e+07	±	1.88188e+07	0	±	0	0
Q61093;E9Q7S3;E9Q802	Cytochrome b-245 heavy chain	1.74115e+07	±	3.18233e+07	163596	±	365812	0.00939584
Q9CQI6;A0A1D5RLP1	Coactosin-like protein	17077500	±	2.05644e+07	1397338	±	2.61573e+06	0.0818233
P84084	ADP-ribosylation factor 5	1.70754e+07	±	3.00006e+07	1154340	±	1.58833e+06	0.0676027
P29351	Tyrosine-protein phosphatase non-receptor type 6	16941725	±	3.14202e+07	219400	±	490593	0.0129503
P97384;D3Z7U0	Annexin A11;Annexin	1.69341e+07	±	3.30537e+07	277346	±	384752	0.0163779
O89020	Afamin	16835475	±	1.34694e+07	0	±	0	0
B8JJM5;F6VQX8;B8JJN0;P04186;F6XQ00;B8JJM6;H3BK95;B8JJM3;F6W2T4	Complement factor B;Complement factor B Ba fragment;Complement factor B Bb fragment	1.67057e+07	±	1.08486e+07	707730	±	699685	0.0423646
P20029	78 kDa glucose-regulated protein	16615175	±	3.02491e+07	459210	±	1.02682e+06	0.027638
H3BKI8;A0A286YDM3;H3BK96;H3BKD0;B2M1R6;P61979;A0A286YCM2;H3BLL4;A0A286YEC4;A0A286YE41;H3BJ43;H3BJS9;Q8BT23;A0A286YDH1	Heterogeneous nuclear ribonucleoprotein K	16482385	±	2.94509e+07	536290	±	745546	0.0325372
Q91XQ0	Dynein heavy chain 8, axonemal	16289000	±	2.00689e+07	0	±	0	0
P05201	Aspartate aminotransferase, cytoplasmic	16100500	±	1.97587e+07	576440	±	806873	0.0358026
P29788	Vitronectin	15900075	±	7.52735e+06	1701600	±	1.83492e+06	0.107018
P08113;F7C312	Endoplasmin	1.58802e+07	±	2.85886e+07	596120	±	840358	0.0375385
Q9QUI0;A0A0A6YXF6;Q62159;A0A0G2JEP8;H3BL56;A0A0A6YWJ1;Q9CR99;P62746	Transforming protein RhoA;Rho-related GTP-binding protein RhoC	15842870	±	2.26647e+07	859533	±	1.21684e+06	0.0542536
P10810	Monocyte differentiation antigen CD14	15769175	±	3.06028e+07	0	±	0	0
Q5SXR6;Q68FD5;F6Z1R4	Clathrin heavy chain;Clathrin heavy chain 1	1.51944e+07	±	2.78492e+07	700770	±	969604	0.0461202
P43275	Histone H1.1	1.51497e+07	±	2.68351e+07	1113106	±	2.01452e+06	0.0734737
Q01853	Transitional endoplasmic reticulum ATPase	1.49604e+07	±	2.48355e+07	4853690	±	5.28584e+06	0.324436
Q8BH61	Coagulation factor XIII A chain	13983875	±	2.40417e+07	0	±	0	0
P16045	Galectin-1	1.39776e+07	±	1.98226e+07	0	±	0	0
Q3THE2;Q6ZWQ9;Q9CQ19	Myosin regulatory light chain 12B;Myosin regulatory light polypeptide 9	1.39228e+07	±	2.13736e+07	1766575	±	2.31086e+06	0.126884
P97872;Q14DT3;Q8C116	Dimethylaniline monooxygenase [N-oxide-forming] 5	1.38934e+07	±	7.06525e+06	24500010	±	2.74555e+07	1.76342
P47911;A0A0J9YU32	60S ribosomal protein L6	13737025	±	2.4529e+07	4300190	±	4.8776e+06	0.313036
A9R9W0;A2CEL1;P11588;A2CEL0;L7MUC7;A2CEK9	Major urinary protein 1	13718855	±	2.42198e+07	1874090	±	3.39529e+06	0.136607
P28293	Cathepsin G	13502380	±	2.19201e+07	562200	±	1.25712e+06	0.0416371
Q61878	Bone marrow proteoglycan;Eosinophil granule major basic protein	13442500	±	1.85821e+07	0	±	0	0
A0A0A0MQA5;P68368;A0A087WQS4;A0A087WRB4;A0A087WSB0;A0A087WSL5	Tubulin alpha-4A chain	13262025	±	2.12456e+07	1726760	±	2.76449e+06	0.130203
P62827;Q14AA6;Q61820	GTP-binding nuclear protein Ran	1.3239e+07	±	2.14757e+07	2015436	±	2.57047e+06	0.152235
Q8BT60;Q9D6C8;A0A0R4J0J1;Q3UYN2;Q1RLL3;Q9Z140;Q8BLR2;Q0VE82;Q9DC53;Q8JZW4	Copine-3	13229375	±	2.28151e+07	0	±	0	0
O09043	Napsin-A	13202525	±	1.43051e+07	11607450	±	7.98001e+06	0.879184
I7HPY0;Q91VW3	SH3 domain-binding glutamic acid-rich-like protein 3	1.26398e+07	±	1.25934e+07	5541530	±	5.01985e+06	0.438418
E9PWU4;Q60994	Adiponectin	12505475	±	1.36715e+07	131882	±	294897	0.0105459
Q07456	Protein AMBP;Alpha-1-microglobulin;Inter-alpha-trypsin inhibitor light chain;Trypstatin	1.25014e+07	±	1.1091e+07	0	±	0	0
P04104	Keratin, type II cytoskeletal 1	1.24031e+07	±	2.33765e+07	0	±	0	0
P41245	Matrix metalloproteinase-9	12364175	±	2.1203e+07	170972	±	382305	0.013828
Q9R111;D3YU09;A0A494B982	Guanine deaminase	12350575	±	2.32129e+07	0	±	0	0
P0DP28;P0DP27;P0DP26;Q3UKW2;A0A3Q4EHJ0;A0A1Y7VK66;Q9D6P8;P20801	Calmodulin-like protein 3	12134250	±	24268500	3831380	±	7.7732e+06	0.315749
A0A0A6YY34;A0A0A6YVV2;P11352	Glutathione peroxidase;Glutathione peroxidase 1	1.20215e+07	±	1.92943e+07	0	±	0	0
P09103;E9Q8G8	Protein disulfide-isomerase	1.19889e+07	±	2.2875e+07	1975350	±	1.87719e+06	0.164765
A0A075B5P6;A0A075B6A0;P01872	Ig mu chain C region	11976625	±	1.8495e+07	0	±	0	0
P14211	Calreticulin	11785900	±	1.99946e+07	1737250	±	3.88461e+06	0.147401
Q9Z1Q5	Chloride intracellular channel protein 1	11724640	±	1.6969e+07	456760	±	1.02135e+06	0.0389573
P08074;F6YNX9	Carbonyl reductase [NADPH] 2	11687000	±	23374000	607497	±	833726	0.0519806
Q99LB4;P24452;D3YZN3;D3YU77;D3YTL5;D3Z4K5	Macrophage-capping protein	11677275	±	2.21001e+07	1814880	±	1.85536e+06	0.15542
O70145;A0A087WPH0	Neutrophil cytosol factor 2	11549750	±	1.81936e+07	0	±	0	0
A0A0N4SUU7		11376900	±	1.85714e+07	0	±	0	0
Q6S9I0;Q6S9I2;Q6S9I3;A0A338P699;A0A338P7D0;E0CYI5;CON__P01045-1;CON__Q2KJ62;CON__P01044-1		1.13664e+07	±	8.71163e+06	0	±	0	0
Q80YQ1;P35441;CON__Q28194	Thrombospondin-1	11169750	±	22339500	228060	±	509958	0.0204176
F8WIT2;P14824	Annexin;Annexin A6	11054475	±	2.13312e+07	0	±	0	0
P01887	Beta-2-microglobulin	1.10506e+07	±	1.68936e+07	1288594	±	1.01919e+06	0.116609
Q3U9G9;A0A0A6YWS3;A0A0A6YXW3;A0A0A6YXT6;A0A0A6YW01;A0A0A6YY12	Lamin-B receptor	1.10258e+07	±	1.9072e+07	883520	±	1.97561e+06	0.080132
A2A513;CON__P02535-1;P02535	Keratin, type I cytoskeletal 10	10951725	±	1.86189e+07	216420	±	483930	0.0197613
P70460	Vasodilator-stimulated phosphoprotein	10818175	±	1.91622e+07	623840	±	1.39495e+06	0.0576659
P62908;D3YV43;A0A140LI77	40S ribosomal protein S3	10580175	±	1.86754e+07	5879280	±	5.97563e+06	0.555688
Q82Z41		10421000	±	20842000	0	±	0	0
Q9CQV8;A2A5N1	14-3-3 protein beta/alpha;14-3-3 protein beta/alpha, N-terminally processed	1.03872e+07	±	7.18224e+06	5376170	±	7.87345e+06	0.517575
P43274	Histone H1.4	10355625	±	1.37366e+07	641660	±	879043	0.0619625
Q9Z183;E9QAM4;Q9Z184	Protein-arginine deiminase type-4	10331600	±	1.83826e+07	0	±	0	0
P14152	Malate dehydrogenase, cytoplasmic	1.02331e+07	±	1.67825e+07	2190410	±	2.69163e+06	0.214051
P01837	Ig kappa chain C region	1.01114e+07	±	4.88502e+06	0	±	0	0
A2CEK6;B5X0G2;L7N222	Major urinary protein 17	9979375	±	19958750	0	±	0	0
A0A075B5P3;A0A0A6YVP0;P01867	Ig gamma-2B chain C region	9973650	±	8.84536e+06	185880	±	415640	0.0186371
G3UY29;E9Q3P9;F8WGS1;P62492;P46638;G3UZD3;G3UZL4;D3YYB3	Ras-related protein Rab-11A;Ras-related protein Rab-11B	9709075	±	1.68861e+07	2304160	±	2.57345e+06	0.23732
F6T0D3		9670750	±	19341500	0	±	0	0
F7CAZ6;A2AMW0;P47757;A0A0A0MQI9;F6YHZ8	F-actin-capping protein subunit beta	9.65856e+06	±	1.53309e+07	0	±	0	0
Q6GT24;D3Z0Y2;O08709;Q8BG37	Peroxiredoxin-6	9305165	±	1.80913e+07	529270	±	1.18348e+06	0.0568792
Q06770	Corticosteroid-binding globulin	9268325	±	1.40378e+07	0	±	0	0
P16015	Carbonic anhydrase 3	9213100	±	4.98221e+06	1653520	±	1.76815e+06	0.179475
P57096	Prostate stem cell antigen	9187725	±	7.09522e+06	3529060	±	4.93686e+06	0.384106
P60843;Q8BTU6;P10630;E9Q561;A0A338P6X5	Eukaryotic initiation factor 4A-I	9.1845e+06	±	1.3526e+07	3392548	±	3.34742e+06	0.369377
Q9Z2U0;A0A338P7D7;Q9CWH6;B7ZMS4	Proteasome subunit alpha type-7;Proteasome subunit alpha type-7-like	9.15208e+06	±	1.53678e+07	1842040	±	2.79662e+06	0.20127
G3X977;Q61703;Q3UEG7;CON__Q9TRI1	Inter-alpha-trypsin inhibitor heavy chain H2	9091900	±	1.33717e+07	0	±	0	0
S4R293;F8WH69;Q09014	Neutrophil cytosol factor 1	9.06429e+06	±	1.54603e+07	658340	±	1.47209e+06	0.0726301
Q9QXC1;Q6YJU1	Fetuin-B	8.94164e+06	±	6.65706e+06	140180	±	313452	0.0156772
P49710;E9Q4E5	Hematopoietic lineage cell-specific protein	8.90996e+06	±	1.67387e+07	0	±	0	0
P14733;A0A0R4J0Q5;P21619	Lamin-B1	8801350	±	1.4551e+07	166700	±	372753	0.0189403
A0A0A0MQM0;P63242;Q8BGY2;J3QPS8	Eukaryotic translation initiation factor 5A;Eukaryotic translation initiation factor 5A-1;Eukaryotic translation initiation factor 5A-2	8788750	±	1.22188e+07	0	±	0	0
O09131;A0A494BAB1;A0A494B9X6;A0A494BAY2;A0A494BB82;Q8K2Q2	Glutathione S-transferase omega-1	8.64266e+06	±	1.08316e+07	10171720	±	1.32027e+07	1.17692
P50516;D3Z1B9;D3YWH3;D3YZ23	V-type proton ATPase catalytic subunit A	8639225	±	1.64934e+07	0	±	0	0
A0A1L1SU53;Q9Z0P5;A0A087WRG4;A0A1L1STC8	Twinfilin-2	8.61501e+06	±	1.55325e+07	0	±	0	0
Q5RKN9;P47753;A0A0G2JE27	F-actin-capping protein subunit alpha-1	8.58369e+06	±	1.66953e+07	0	±	0	0
Q02053;P31254	Ubiquitin-like modifier-activating enzyme 1	8565350	±	1.6103e+07	576312	±	537025	0.0672841
Q8BJS4	SUN domain-containing protein 2	8.55876e+06	±	1.25331e+07	132688	±	296699	0.0155032
A0A1L1SQA8;P62852	40S ribosomal protein S25	8.43434e+06	±	1.19502e+07	2746046	±	2.56314e+06	0.325579
Q8VEK3	Heterogeneous nuclear ribonucleoprotein U	8268625	±	1.5285e+07	596730	±	849991	0.072168
P97369;A8XU21	Neutrophil cytosol factor 4	8213900	±	1.31402e+07	360280	±	805611	0.0438622
Q61129;A0A0G2JF07	Complement factor I;Complement factor I heavy chain;Complement factor I light chain	8.17316e+06	±	6.9617e+06	0	±	0	0
Q6P069	Sorcin	8097975	±	1.36236e+07	920580	±	1.31783e+06	0.11368
P14131	40S ribosomal protein S16	8096175	±	1.44251e+07	636800	±	965755	0.0786544
A0A571BEL9;P80317;Q61390	T-complex protein 1 subunit zeta	8067375	±	9.94367e+06	580173	±	1.05688e+06	0.071916
A0A1L1SV25;P57780;E9Q2W9;D3Z761;D3Z0L8;A0A1L1SVJ6;Q91ZE6;E9PX29	Alpha-actinin-4	7834650	±	1.4915e+07	312856	±	428421	0.0399324
P63028;D3YU75	Translationally-controlled tumor protein	7739675	±	1.3694e+07	0	±	0	0
Q9QZQ8;Q8CCK0	Core histone macro-H2A.1	7664350	±	1.17904e+07	494987	±	485695	0.064583
Q8CI94	Glycogen phosphorylase, brain form	7630875	±	15261750	3067980	±	4.6908e+06	0.402048
Q9Z1N5;G3UXI6;Q8VDW0;D6RHT5	Spliceosome RNA helicase Ddx39b;ATP-dependent RNA helicase DDX39A	7300750	±	14601500	189199	±	423062	0.025915
P09405	Nucleolin	7273150	±	1.32248e+07	1510014	±	2.02516e+06	0.207615
M0QWU8;P31786	Acyl-CoA-binding protein	7215150	±	9.04815e+06	1534430	±	3.43109e+06	0.212668
S4R1N6;F6YVP7;P62270;A0A1Y7VKY1;A0A3Q4EGP3	40S ribosomal protein S18	7.11648e+06	±	1.14924e+07	1790340	±	1.89277e+06	0.251577
F8WJ05;Q61702	Inter-alpha-trypsin inhibitor heavy chain H1	7077925	±	7.61572e+06	0	±	0	0
Q9QUM9;E0CXB1	Proteasome subunit alpha type-6	7055625	±	14111250	0	±	0	0
Q64727	Vinculin	7.05114e+06	±	9.26505e+06	831352	±	1.40919e+06	0.117903
Q61171;D3Z4A4	Peroxiredoxin-2	6899550	±	7.03518e+06	14236180	±	1.84184e+07	2.06335
P11589	Major urinary protein 2	6798575	±	1.21677e+07	0	±	0	0
Q9DBB9	Carboxypeptidase N subunit 2	6.73479e+06	±	5.55135e+06	0	±	0	0
P30355;A0A0J9YV38;A0A0J9YUC8	Arachidonate 5-lipoxygenase-activating protein	6719250	±	1.10662e+07	409500	±	915670	0.0609443
P34928	Apolipoprotein C-I;Truncated apolipoprotein C-I	6691250	±	8.09228e+06	745500	±	1.66699e+06	0.111414
P80318;E9Q133;Q3U0I3;F6Q609	T-complex protein 1 subunit gamma	6665500	±	13331000	1648654	±	2.32366e+06	0.247341
A0A1Y7VM65;Q9QUH0	Glutaredoxin-1	6495750	±	9.42637e+06	0	±	0	0
A0A494BA97;Q62422;A0A494B943	Osteoclast-stimulating factor 1	6.47884e+06	±	9.19367e+06	0	±	0	0
P08030;A0A1D5RLR6	Adenine phosphoribosyltransferase	6468575	±	1.09287e+07	264740	±	591977	0.0409271
Q922B2	Aspartate--tRNA ligase, cytoplasmic	6274400	±	1.09167e+07	96160	±	215020	0.0153258
Q9EQ06	Estradiol 17-beta-dehydrogenase 11	6230150	±	1.1372e+07	299063	±	411925	0.0480025
P62320	Small nuclear ribonucleoprotein Sm D3	6197000	±	12394000	0	±	0	0
P21981;G3UXE8	Protein-glutamine gamma-glutamyltransferase 2	6047500	±	12095000	0	±	0	0
P84096	Rho-related GTP-binding protein RhoG	5.93406e+06	±	9.98099e+06	0	±	0	0
G3UWN9;G3UXY0;G3UXZ5;P97371;G3X9K9	Proteasome activator complex subunit 1	5918875	±	9.91726e+06	0	±	0	0
O08997	Copper transport protein ATOX1	5864775	±	5.47207e+06	0	±	0	0
A0A1B0GSG5;Q91VI7;A0A1B0GRG4	Ribonuclease inhibitor	5.83079e+06	±	8.26856e+06	1809820	±	2.53175e+06	0.31039
P42932;H3BL49;H3BJB6;H3BKR8;H3BLL1;H3BKG2	T-complex protein 1 subunit theta	5768775	±	1.01157e+07	2184470	±	3.38505e+06	0.378671
A0A075B5P4;A0A0A6YWR2;P01868;P01869	Ig gamma-1 chain C region secreted form;Ig gamma-1 chain C region, membrane-bound form	5720750	±	3.87803e+06	594140	±	871769	0.103857
P50247;A2ALT5	Adenosylhomocysteinase	5.71287e+06	±	9.63062e+06	893710	±	890363	0.156438
P19783	Cytochrome c oxidase subunit 4 isoform 1, mitochondrial	5561525	±	9.42739e+06	986680	±	2.20628e+06	0.177412
Q835W5		5474750	±	10949500	0	±	0	0
Q61792;A2A6G9;A2A6H0;A2A6G7;A2A6G8;A2A6G0;A2A6G6	LIM and SH3 domain protein 1	5357125	±	7.40856e+06	2609360	±	3.57673e+06	0.487082
P48999;E9QA93;E9Q6H6;A0A0N4SW45	Arachidonate 5-lipoxygenase	5.27899e+06	±	9.74028e+06	98302	±	219810	0.0186214
Q8C266;Q9CQD1;P61021;P35278;A2A5F6;A2A5F5	Ras-related protein Rab-5A;Ras-related protein Rab-5B;Ras-related protein Rab-5C	5.27697e+06	±	7.54427e+06	624960	±	919341	0.118432
P61358;A2A4Q0	60S ribosomal protein L27	5.22739e+06	±	8.32111e+06	1593820	±	2.38831e+06	0.304898
Q9JI95;Q64433	10 kDa heat shock protein, mitochondrial	5214975	±	8.35138e+06	957092	±	1.0043e+06	0.183528
P01897;P01899;P01896	H-2 class I histocompatibility antigen, L-D alpha chain;H-2 class I histocompatibility antigen, D-B alpha chain;H-2 class I histocompatibility antigen, alpha chain	5177525	±	9.36846e+06	0	±	0	0
O70435;E0CZ34;F8WH02;E0CYL6;E0CX62	Proteasome subunit alpha type-3	5158725	±	9.06394e+06	0	±	0	0
P62242	40S ribosomal protein S8	5078250	±	9.3641e+06	1278980	±	1.19947e+06	0.251854
Q839G8		5.07541e+06	±	5.04224e+06	1911110	±	4.27337e+06	0.376543
P26040	Ezrin	5034050	±	5.85201e+06	5252520	±	7.33359e+06	1.0434
G3X920;Q9DBR3	Armadillo repeat-containing protein 8	5021500	±	10043000	0	±	0	0
A2AL12;Q8BG05	Heterogeneous nuclear ribonucleoprotein A3	5020700	±	8.02137e+06	0	±	0	0
Q9Z1Q2	Abhydrolase domain-containing protein 16A	5019250	±	10038500	0	±	0	0
P17047	Lysosome-associated membrane glycoprotein 2	5016500	±	10033000	0	±	0	0
Q3TLP8;P63001;P60764;A2AC13;A0A2R8VH29;A0A1B0GSL4;G3UZM2;D3Z3L1;F2Z463;D3YX61;Q8R527;Q9ER71	Ras-related C3 botulinum toxin substrate 1;Ras-related C3 botulinum toxin substrate 3	5005350	±	7.80205e+06	183378	±	410046	0.0366364
P05202	Aspartate aminotransferase, mitochondrial	4976365	±	6.50664e+06	1303980	±	1.86897e+06	0.262035
A0A494BBB0;O35350	Calpain-1 catalytic subunit	4968500	±	9937000	1497310	±	1.7559e+06	0.301361
Q9WVK4	EH domain-containing protein 1	4902125	±	9804250	0	±	0	0
P63325;A0A338P731;Q3UW83;A0A338P7K4;A0A3B2W864	40S ribosomal protein S10	4871000	±	9742000	447940	±	614479	0.0919606
G3UX26;Q60930;D3YZT5;A0A286YCR8;D3YUN8	Voltage-dependent anion-selective channel protein 2	4865025	±	6.74012e+06	368976	±	507021	0.0758426
D3Z1T4;D3Z1M1;D3YZX3;E9QKR0;P62880;H3BLF7;H3BKR2;P29387;P62874;E9PWM7;Q61011	Guanine nucleotide-binding protein G(I)/G(S)/G(T) subunit beta-2;Guanine nucleotide-binding protein subunit beta-4;Guanine nucleotide-binding protein G(I)/G(S)/G(T) subunit beta-1	4765945	±	7.83943e+06	0	±	0	0
E9PZ00;Q8BFQ1;K3W4L3;J3QPG5;Q61207	Prosaposin	4.73156e+06	±	4.79653e+06	1909320	±	3.07272e+06	0.403528
Q4U4S6	Xin actin-binding repeat-containing protein 2	4686750	±	9373500	0	±	0	0
E9PYF1;Q8VCT3	Aminopeptidase B	4643000	±	9286000	503780	±	1.12649e+06	0.108503
Q91YR9;REV__Q3TVC7;REV__A0A0R4J177	Prostaglandin reductase 1	4633655	±	6.75842e+06	2987010	±	5.2231e+06	0.644634
Q8BND5	Sulfhydryl oxidase 1	4.62606e+06	±	4.21448e+06	0	±	0	0
Q9QXT9	Zinc finger protein 354B	4.56419e+06	±	5.28367e+06	0	±	0	0
Q924B0;O55023;Q80ZJ2	Inositol monophosphatase 1	4551875	±	9103750	149459	±	334200	0.0328346
Q91XL1		4534075	±	5.67909e+06	0	±	0	0
Q9D6Y7;A0A1B0GT40	Mitochondrial peptide methionine sulfoxide reductase	4.53224e+06	±	7.89149e+06	185032	±	413744	0.0408258
Q9CZX8;D3YUT3;D3YUG3;D3Z5R8;D3Z722;S4R223	40S ribosomal protein S19	4.48152e+06	±	7.46718e+06	1617690	±	1.99503e+06	0.360969
H3BK03;P52430;H3BLB8	Serum paraoxonase/arylesterase 1	4477225	±	4.55341e+06	0	±	0	0
G5E850;P56395;E0CY88	Cytochrome b5	4455000	±	8910000	885130	±	1.97921e+06	0.198682
A2AKN8;E9PVW0;B8JI96;A2BIN0;P11591		4390875	±	8781750	0	±	0	0
P35564	Calnexin	4339125	±	8678250	92718	±	207324	0.0213679
Q9D8N0	Elongation factor 1-gamma	4271245	±	6.70636e+06	1796710	±	2.25364e+06	0.420653
P62918	60S ribosomal protein L8	4270200	±	5.41946e+06	2360400	±	2.50979e+06	0.552761
Q6QI06	Rapamycin-insensitive companion of mTOR	4257000	±	8514000	0	±	0	0
Q62093	Serine/arginine-rich splicing factor 2	4256600	±	7.18569e+06	371388	±	508611	0.0872499
P97351	40S ribosomal protein S3a	4251250	±	8502500	2118270	±	2.48679e+06	0.49827
P62259;F6WA09;D6REF3	14-3-3 protein epsilon	4.24708e+06	±	7.84912e+06	1528620	±	1.80049e+06	0.359922
Q8C2Q7;P70333;O35737	Heterogeneous nuclear ribonucleoprotein H2;Heterogeneous nuclear ribonucleoprotein H;Heterogeneous nuclear ribonucleoprotein H, N-terminally processed	4233800	±	7.30258e+06	201220	±	449942	0.047527
P16125;A0A0N4SVV8;D3Z7F0	L-lactate dehydrogenase B chain;L-lactate dehydrogenase	4.19844e+06	±	2.51034e+06	16272462	±	2.50286e+07	3.87584
Q8CG29;P70248;G3V011	Unconventional myosin-If	4195375	±	8390750	0	±	0	0
Q921R2;P62301;A0A0U1RQ71	40S ribosomal protein S13	4158425	±	7.64136e+06	625990	±	922230	0.150535
Q99PT1	Rho GDP-dissociation inhibitor 1	4.11559e+06	±	7.56307e+06	1307710	±	2.21134e+06	0.317746
E9Q1Z0		4106000	±	8212000	0	±	0	0
Q9ERI2	Ras-related protein Rab-27A	4062000	±	8124000	0	±	0	0
Q61029;Q61033	Lamina-associated polypeptide 2, isoforms beta/delta/epsilon/gamma	4057875	±	8115750	0	±	0	0
D3YY36;Q9DBD0;F6W4D3	Inhibitor of carbonic anhydrase	4.04944e+06	±	3.23092e+06	0	±	0	0
D3YVB4;D3Z712;F8WJ41;P62245	40S ribosomal protein S15a	4018125	±	8036250	0	±	0	0
P39654	Arachidonate 15-lipoxygenase	3991900	±	7983800	0	±	0	0
Q76MZ3;G3UWL2	Serine/threonine-protein phosphatase 2A 65 kDa regulatory subunit A alpha isoform	3985500	±	7971000	1095781	±	1.23781e+06	0.274942
Q9DAY9;Q5SQB0;Q5SQB5;Q61937	Nucleophosmin	3970600	±	6.70785e+06	579660	±	1.29616e+06	0.145988
P27048;P63163;A0A0G2JGN4	Small nuclear ribonucleoprotein-associated protein B;Small nuclear ribonucleoprotein-associated protein N	3950000	±	7900000	0	±	0	0
A0A494B9W3;Q8K1B8;A0A494BBJ8;A0A494B9F7	Fermitin family homolog 3	3927300	±	6.49977e+06	283890	±	634797	0.0722863
Q8C845;Q9D8Y0	EF-hand domain-containing protein D2	3887975	±	7775950	0	±	0	0
Q8CAG6;Q9JHK5	Pleckstrin	3878050	±	6.60136e+06	0	±	0	0
P84104	Serine/arginine-rich splicing factor 3	3869600	±	6.45016e+06	0	±	0	0
H3BKL7;E9Q797;P49183;D3YXC7	Deoxyribonuclease-1	3864000	±	7.07933e+06	1311440	±	2.10556e+06	0.3394
P25444;D3YVC1;D3YWJ3	40S ribosomal protein S2	3.79479e+06	±	7589575	382260	±	854759	0.100733
G3X8T9;Q91WP6;H7BWY0;Q6P4P1	Serine protease inhibitor A3N	3745675	±	6.38084e+06	0	±	0	0
D3YWF6;Q7TQI3;D3Z7K0	Ubiquitin thioesterase OTUB1	3692375	±	7384750	0	±	0	0
P26262	Plasma kallikrein;Plasma kallikrein heavy chain;Plasma kallikrein light chain	3628125	±	3.45569e+06	0	±	0	0
F6W322;B8JK33;B8JK32;Q9D0E1;A0A3Q4EH91	Heterogeneous nuclear ribonucleoprotein M	3596200	±	6.0761e+06	178016	±	398056	0.0495011
E9Q616;A0A494BBD5		3.59521e+06	±	7190425	495720	±	1.10846e+06	0.137883
Q08093;D3Z7R6;A0A0G2JDV8;Q9DAW9	Calponin-2	3579300	±	4.86208e+06	400830	±	896283	0.111986
Q60932	Voltage-dependent anion-selective channel protein 1	3564175	±	5.33678e+06	0	±	0	0
P26350;A0A087WP98;A0A087WPN6;A0A087WQN2	Prothymosin alpha;Prothymosin alpha, N-terminally processed;Thymosin alpha	3544000	±	6.35175e+06	2251750	±	5.03507e+06	0.63537
Q03734;P29621	Serine protease inhibitor A3M	3511055	±	2.73787e+06	351820	±	786693	0.100204
P51885;CON__Q05443	Lumican	3502475	±	2.27023e+06	0	±	0	0
P80314;A0A1W2P7B7;A0A1W2P828;A0A1W2P871;A0A1W2P6Q3	T-complex protein 1 subunit beta	3434500	±	6869000	1734970	±	2.22839e+06	0.505159
P60867	40S ribosomal protein S20	3429250	±	5.31029e+06	1350350	±	1.43121e+06	0.393774
P35282;A0A1W2P6Z4	Ras-related protein Rab-21	3.36719e+06	±	6734375	626500	±	899678	0.18606
Q3U3V1;O88947	Coagulation factor X;Factor X light chain;Factor X heavy chain;Activated factor Xa heavy chain	3.30546e+06	±	3.07409e+06	0	±	0	0
A0A0R4J0R1;O70404;A0A0U1RPE8	Vesicle-associated membrane protein 8	3.29926e+06	±	5.13626e+06	0	±	0	0
Q8CB58;Q8BGJ5;Q922I7;F7C521;F7DCW4;E9QMW9;G8JL74;G3UXA6;Q8BHD7;P17225	Polypyrimidine tract-binding protein 3;Polypyrimidine tract-binding protein 1	3.28294e+06	±	5.69647e+06	123542	±	276248	0.0376315
Q91YQ5;A0A0N4SUJ8	Dolichyl-diphosphooligosaccharide--protein glycosyltransferase subunit 1	3275500	±	6551000	353880	±	791300	0.108038
P35979	60S ribosomal protein L12	3.23937e+06	±	4.54427e+06	1394970	±	2.3193e+06	0.43063
P07515		3225475	±	4.30617e+06	432440	±	966965	0.13407
Q9DB77;A0A140LI98	Cytochrome b-c1 complex subunit 2, mitochondrial	3199750	±	6399500	200280	±	447840	0.0625924
Q9CR57	60S ribosomal protein L14	3.16981e+06	±	4.91408e+06	1259660	±	1.30492e+06	0.397393
P62754	40S ribosomal protein S6	3.16466e+06	±	5.36921e+06	886680	±	1.21419e+06	0.280182
P97429;F7ANV6;D3Z0S1;A0A0N4SW89;A0A0N4SV57;S4R1F2	Annexin A4;Annexin	3156225	±	6312450	2187880	±	2.92056e+06	0.693195
D3Z1A9;D3Z313;Q9DCC5;P23198	Chromobox protein homolog 3	3122400	±	4.8687e+06	0	±	0	0
Q9Z2X1;J3QM80;J3QMT0	Heterogeneous nuclear ribonucleoprotein F;Heterogeneous nuclear ribonucleoprotein F, N-terminally processed	3100150	±	6200300	314210	±	702595	0.101353
P00405	Cytochrome c oxidase subunit 2	3.08836e+06	±	4.96863e+06	687120	±	942787	0.222487
Q8CBG6;Q9CQ60;D3Z4X1;F6X8L5	6-phosphogluconolactonase	3083950	±	5.34859e+06	545660	±	747189	0.176935
Q9CZM2;B8JKK2	60S ribosomal protein L15;Ribosomal protein L15	3.08384e+06	±	4.51381e+06	1246680	±	1.26405e+06	0.404262
P29595	NEDD8	3075875	±	6151750	0	±	0	0
A0A0R4J0B2;Q8VCI0	Phospholipase B-like 1;Phospholipase B-like 1 chain A;Phospholipase B-like 1 chain B;Phospholipase B-like 1 chain C	3047625	±	6095250	0	±	0	0
Q9D132	Uroplakin-1a	3032850	±	3.75547e+06	486520	±	1.08789e+06	0.160417
Q6ZWV7	60S ribosomal protein L35	3.02495e+06	±	4.99188e+06	1401208	±	1.66967e+06	0.463217
Q5SVG5;Q5SVG4;O35643;H3BKM0;H3BIY9;Q9DBG3	AP-1 complex subunit beta-1;AP complex subunit beta;AP-2 complex subunit beta	3.00816e+06	±	6016325	0	±	0	0
P62748;A0A1Y7VMK3	Hippocalcin-like protein 1	2985625	±	5971250	0	±	0	0
A0A1W2P720;A0A1W2P869;A0A1W2P6N3;Q99JZ4;Q9CQC9;P36536	GTP-binding protein SAR1b;GTP-binding protein SAR1a	2981250	±	5962500	525360	±	728520	0.176221
P12970	60S ribosomal protein L7a	2950125	±	5900250	1031630	±	981189	0.34969
F6QYF8;Q11011;E9Q039	Puromycin-sensitive aminopeptidase	2948500	±	5897000	0	±	0	0
Q9D8E6	60S ribosomal protein L4	2923500	±	5847000	720604	±	1.18408e+06	0.246487
F8WIR1;P18242;F6Y6L6;A0A1B0GT66	Cathepsin D	2915625	±	5831250	1124220	±	1.96429e+06	0.385585
P11983	T-complex protein 1 subunit alpha	2.89516e+06	±	5790325	720290	±	997442	0.248791
S4R1M0;P06800	Protein-tyrosine-phosphatase;Receptor-type tyrosine-protein phosphatase C	2892550	±	5785100	0	±	0	0
Q6ZWZ7;Q9CPR4;B2RY53	60S ribosomal protein L17	2.81001e+06	±	5620025	623900	±	1.39508e+06	0.222027
Q19LI2	Alpha-1B-glycoprotein	2.78769e+06	±	2.32558e+06	0	±	0	0
Q9R1P3	Proteasome subunit beta type-2	2782390	±	5.01674e+06	326210	±	471543	0.117241
A2AKV1;A2AKV2;A2AKV3;Q8C2Q8;A2AKU9;Q91VR2;A2AKV0	ATP synthase subunit gamma;ATP synthase subunit gamma, mitochondrial	2771750	±	5543500	155714	±	348187	0.0561789
Q9ERL7;D3Z2F6;D3YY16;A0A2I3BR94;A0A2I3BPS1;Q9CQI3	Glia maturation factor gamma;Glia maturation factor beta	2769900	±	3.36412e+06	726536	±	1.1832e+06	0.262297
P14148;F6XI62	60S ribosomal protein L7	2.76429e+06	±	5528575	1265552	±	2.35769e+06	0.457822
Q9DCM0	Persulfide dioxygenase ETHE1, mitochondrial	2.76071e+06	±	4.29137e+06	0	±	0	0
P97425	Eosinophil cationic protein 2	2747350	±	3.43118e+06	0	±	0	0
P60335	Poly(rC)-binding protein 1	2.73971e+06	±	4.56535e+06	1171600	±	1.3585e+06	0.427636
A0A075B5P5;A0A1Y7VJN6;P03987	Ig gamma-3 chain C region	2.7249e+06	±	2.71016e+06	0	±	0	0
P09813	Apolipoprotein A-II;Proapolipoprotein A-II	2.71986e+06	±	3.23713e+06	1528830	±	2.46493e+06	0.562098
P62137;A0A0J9YUU8;A0A0G2JFF1;P63087;P62141	Serine/threonine-protein phosphatase PP1-alpha catalytic subunit;Serine/threonine-protein phosphatase PP1-gamma catalytic subunit;Serine/threonine-protein phosphatase PP1-beta catalytic subunit	2.71664e+06	±	4.21807e+06	0	±	0	0
B1AT92;Q60631;B1AT95	Growth factor receptor-bound protein 2	2705525	±	4.55495e+06	0	±	0	0
A0A1B0GS70;Q9R1P4	Proteasome subunit alpha type-1	2.69431e+06	±	3.92415e+06	446360	±	998091	0.165667
A0A286YDW8;Q99JI4	26S proteasome non-ATPase regulatory subunit 6	2681500	±	5363000	0	±	0	0
G5E839;P80315	T-complex protein 1 subunit delta	2675400	±	5350800	445764	±	996759	0.166616
P50543	Protein S100-A11	2673250	±	3.08957e+06	1134260	±	2.53628e+06	0.4243
Q64726	Zinc-alpha-2-glycoprotein	2663600	±	3.14392e+06	0	±	0	0
H7BWY6;Q00724;A0A494B9P3;A0A494B9T2	Retinol-binding protein 4	2.65786e+06	±	2.33393e+06	118356	±	264652	0.0445305
Q60692	Proteasome subunit beta type-6	2610475	±	5220950	1421030	±	1.45847e+06	0.544357
P00329	Alcohol dehydrogenase 1	2.59666e+06	±	2.11064e+06	19470590	±	2.77617e+07	7.49831
A0A087WNS0;A0A087WQK0;P27659	60S ribosomal protein L3	2569750	±	5139500	0	±	0	0
B1ARA3;P61255;B1ARA5	60S ribosomal protein L26	2.54112e+06	±	4.69117e+06	983460	±	1.55849e+06	0.387019
A0A2C9F2D2;Q07076;A0A286YCW4	Annexin A7	2529050	±	5058100	914160	±	858293	0.361464
P12787	Cytochrome c oxidase subunit 5A, mitochondrial	2.52479e+06	±	5049575	0	±	0	0
P13634;D3YYQ4	Carbonic anhydrase 1	2.50846e+06	±	5016925	2818960	±	6.30339e+06	1.12378
Q9WV55	Vesicle-associated membrane protein-associated protein A	2.49919e+06	±	3.5989e+06	0	±	0	0
B7ZCP7;B7ZCP6;E9Q806;B7ZCP4;Q8C166;V9GWY2;V9GX86;B7ZCP8;B7ZCP5;A3KGK7	Copine-1	2498400	±	4996800	406206	±	609743	0.162586
A3KGU5;A3KGU7;E9Q447;A3KGU9;P16546	Spectrin alpha chain, non-erythrocytic 1	2.45561e+06	±	4911225	0	±	0	0
Q9CQW9;A0A1B0GT68;Q99J93	Interferon-induced transmembrane protein 3;Interferon-induced transmembrane protein 2	2.43274e+06	±	4865475	0	±	0	0
P34884	Macrophage migration inhibitory factor	2408925	±	4817850	135292	±	302522	0.0561628
Q9D668	Arrestin domain-containing protein 2	2399875	±	3.42849e+06	0	±	0	0
P62264;D3YVF4;D3Z7I1	40S ribosomal protein S14	2.37811e+06	±	3.02914e+06	2321390	±	2.46519e+06	0.976148
P97426;O35290	Eosinophil cationic protein 1;Eosinophil cationic-type ribonuclease 3	2377825	±	3.47417e+06	0	±	0	0
A0A087WSQ5;Q99K94;Q8C3V4;A0A087WSP5;P42225	Signal transducer and activator of transcription;Signal transducer and activator of transcription 1	2377550	±	4755100	0	±	0	0
P97315	Cysteine and glycine-rich protein 1	2372500	±	2.28872e+06	0	±	0	0
G3X9V0;P97372	Proteasome activator complex subunit 2	2360700	±	4721400	94725	±	211812	0.0401258
P06684	Complement C5;Complement C5 beta chain;Complement C5 alpha chain;C5a anaphylatoxin;Complement C5 alpha chain	2359075	±	3.02719e+06	0	±	0	0
P14206;A0A1L1SRW0;A0A1L1SUK3	40S ribosomal protein SA	2344675	±	4689350	292700	±	654497	0.124836
Q3SXK0;P38575	Uroplakin-2	2.34109e+06	±	1.92067e+06	4115820	±	4.90141e+06	1.75808
H7C7A0		2.32156e+06	±	4643125	439980	±	983825	0.189519
Z4YKB8;Q3TEA8;A2AM65;Z4YKA3;A2AM63;A2AM69;A2AM70;A2AM62	Heterochromatin protein 1-binding protein 3	2303955	±	4.12237e+06	97910	±	218933	0.0424965
A0A1W2P7Z3;P61089	Ubiquitin-conjugating enzyme E2 N	2293625	±	2.81944e+06	936950	±	1.29126e+06	0.408502
P62315	Small nuclear ribonucleoprotein Sm D1	2287950	±	4575900	285120	±	637548	0.124618
F6SHF3;F6ZV59;G5E8G0;G3X9W0;Q60668	Heterogeneous nuclear ribonucleoprotein D0	2280225	±	4560450	0	±	0	0
D3Z1V4;P70296	Phosphatidylethanolamine-binding protein 1;Hippocampal cholinergic neurostimulating peptide	2.27516e+06	±	2.80383e+06	1508920	±	2.07492e+06	0.663214
D3Z3G6;Q63844;D3Z6D8;A0A0U1RPX4;A0A0U1RPZ0	Mitogen-activated protein kinase;Mitogen-activated protein kinase 3	2273725	±	4547450	380678	±	521824	0.167425
D3Z1Z8;D3Z5N2;P54227;P55821	Stathmin;Stathmin-2	2.26369e+06	±	4527375	0	±	0	0
O70138	Neutrophil collagenase	2.24024e+06	±	4480475	0	±	0	0
Q99KQ4	Nicotinamide phosphoribosyltransferase	2238350	±	4476700	0	±	0	0
A0A338P7C0;O09061	Proteasome subunit beta type-1	2230450	±	4460900	779838	±	1.35278e+06	0.349633
O88536	Formyl peptide receptor 2	2220400	±	4440800	0	±	0	0
D3YWL1;D3YW33;P35276	Ras-related protein Rab-3D	2.20906e+06	±	3.07519e+06	0	±	0	0
P99026	Proteasome subunit beta type-4	2.20636e+06	±	4412725	710360	±	982999	0.32196
P80313;A0A0N4SV00	T-complex protein 1 subunit eta	2.18724e+06	±	4374475	683230	±	1.01099e+06	0.312371
P62855	40S ribosomal protein S26	2179750	±	3.52571e+06	664560	±	1.486e+06	0.304879
E9PWE9;P48025	Tyrosine-protein kinase;Tyrosine-protein kinase SYK	2171175	±	4342350	0	±	0	0
Q60817;P70670	Nascent polypeptide-associated complex subunit alpha;Nascent polypeptide-associated complex subunit alpha, muscle-specific form	2167225	±	4334450	231940	±	518634	0.107022
Q60864	Stress-induced-phosphoprotein 1	2158550	±	4317100	122206	±	273261	0.0566149
Q91V55;D3YYM6;D3Z1S8;P97461	40S ribosomal protein S5;40S ribosomal protein S5, N-terminally processed	2155925	±	3.04096e+06	864270	±	1.25437e+06	0.400881
Q3U2S8	Voltage-gated hydrogen channel 1	2126875	±	4253750	0	±	0	0
A0A0R4J093;Q9DBP5	UMP-CMP kinase	2120025	±	4240050	215960	±	482901	0.101867
A2AH25;Q5FWK3	Rho GTPase-activating protein 1	2.11926e+06	±	3.56834e+06	232635	±	335371	0.109772
P53994;G3UXQ7;G3V022	Ras-related protein Rab-2A	2095375	±	4190750	0	±	0	0
E9QN08;A0A0R4J1L2;Q91VK2;Q80T06;P57776;D3Z7N2;D3YY68;D3YUQ9;D3YZT9;F6ZFU0;A0A0R4J1E2	Elongation factor 1-delta	2092175	±	3.14503e+06	1042260	±	2.33056e+06	0.498171
P28650;J3QN31	Adenylosuccinate synthetase isozyme 1	2.09204e+06	±	4184075	219240	±	490236	0.104797
E9PZC3;Q923D2;E9PZC4;A0A0U1RPU7	Flavin reductase (NADPH)	2088100	±	4176200	2226600	±	4.97883e+06	1.06633
Q830Q8		2088015	±	2.6023e+06	874739	±	1.76411e+06	0.418933
A0A0J9YUE9;Q3T9X3;A0A0J9YUN4;Q3TCR7;G3X9G4;F8WIV5;P39053;P39054;G3UZZ3;D6RH60;G3UY64;G3UXX2;E9QLL2;Q8BZ98	Dynamin-1;Dynamin-2	2.07459e+06	±	4149175	175030	±	391379	0.0843686
A0A3Q4EH04;A0A3Q4L335;A0A3Q4L393;Q8BL97	Serine/arginine-rich splicing factor 7	2061635	±	3.49912e+06	161539	±	361212	0.0783548
P62082	40S ribosomal protein S7	2004375	±	4008750	263220	±	588578	0.131323
Q50HX3;Q91V41;A0A2R8VHW9	Ras-related protein Rab-14	1978900	±	3957800	381304	±	531285	0.192685
Q922Q8	Leucine-rich repeat-containing protein 59	1975950	±	3951900	0	±	0	0
G5E902;Q8VEM8	Phosphate carrier protein, mitochondrial	1968850	±	3937700	933302	±	1.61169e+06	0.474034
P26516	26S proteasome non-ATPase regulatory subunit 7	1960525	±	3921050	0	±	0	0
D3Z6I8;E9Q7Q3;A0A0R4J1P2;P21107;D3YVR0;A2AIM5;S4R2U0;G5E8R0;E9Q453;G5E8R2;G5E8R1;E9Q456;E9Q455;E9Q452;Q8BSH3;Q8BP43;E9Q450;E9Q448;CON__Q3SX28;B7ZNL3;A2AIM4;E9Q454;F8WID5;P58774;P58771	Tropomyosin alpha-3 chain	1940725	±	2.53259e+06	530840	±	1.18699e+06	0.273527
P10605	Cathepsin B;Cathepsin B light chain;Cathepsin B heavy chain	1909700	±	3819400	0	±	0	0
Q61362;D3Z2Z5;D3YXU4	Chitinase-3-like protein 1	1887075	±	3774150	152256	±	340455	0.0806836
Q9CZ13;A0A0A6YW82	Cytochrome b-c1 complex subunit 1, mitochondrial	1.88624e+06	±	3772475	663760	±	944748	0.351896
I7HLV2;Q6ZWV3;P86048;A0A1B0GXC3	60S ribosomal protein L10;60S ribosomal protein L10-like	1.87026e+06	±	3740525	229160	±	512417	0.122528
F6YHE5		1868525	±	3.07357e+06	0	±	0	0
Q9R0P9	Ubiquitin carboxyl-terminal hydrolase isozyme L1	1.86554e+06	±	2.56478e+06	14864190	±	1.71744e+07	7.96776
B1ARC0;B1ARB9;S4R1I6;Q8BTS0;Q61656	Probable ATP-dependent RNA helicase DDX5	1.85344e+06	±	3706875	0	±	0	0
Q02013	Aquaporin-1	1851625	±	3703250	0	±	0	0
P11680	Properdin	1.84739e+06	±	634360	206814	±	462450	0.111949
Q9WUM3;D3YUG6;A0A494B9Y4	Coronin-1B;Coronin	1.84506e+06	±	3690125	118058	±	263986	0.0639859
P47963	60S ribosomal protein L13	1844950	±	3689900	0	±	0	0
A0A0R4J1C2;A0A0R4IZW8;O88456;Q9D7J7	Calpain small subunit 1;Calpain small subunit 2	1.84355e+06	±	3.29357e+06	638135	±	592217	0.346144
P26443	Glutamate dehydrogenase 1, mitochondrial	1.83467e+06	±	2.99193e+06	675182	±	722998	0.368013
A0A0G2JFQ3;D3YZT0;D3Z629;S4R1R7;A0A0G2JES3;A0A140T8T4;P51410	60S ribosomal protein L9	1818875	±	3637750	0	±	0	0
A0A0A0MQG2;Q62261	Spectrin beta chain, non-erythrocytic 1	1.81731e+06	±	3634625	0	±	0	0
D3Z2U2;D3Z637;D3Z125;E9PUA7;D3Z7X7;F8WHQ1;Q62393	Tumor protein D52	1811550	±	3623100	0	±	0	0
Q9Z2U1	Proteasome subunit alpha type-5	1790175	±	2.73938e+06	284710	±	636631	0.15904
P0DOV2;A0A087WRA4;D0QMC3	Myeloid cell nuclear differentiation antigen-like protein	1.78584e+06	±	3571675	0	±	0	0
E9QK48;Q7TNG5	Echinoderm microtubule-associated protein-like 2	1784175	±	2.7274e+06	0	±	0	0
A0A494BAW9;A0A494BAU1;A0A494BAX8;E9PYT3;Q91YH5	Atlastin-3	1780725	±	3561450	0	±	0	0
Q8VCU2;O70362	Phosphatidylinositol-glycan-specific phospholipase D	1759405	±	1.33242e+06	0	±	0	0
P14685;F7B7L8	26S proteasome non-ATPase regulatory subunit 3	1.73464e+06	±	3469275	131812	±	294741	0.0759882
G3X9D9;P48997	Involucrin	1.73381e+06	±	1.5525e+06	17189210	±	2.12413e+07	9.91411
F6ZKZ3;Q9R112;H3BLH2	Sulfide:quinone oxidoreductase, mitochondrial	1.71831e+06	±	3436625	0	±	0	0
P68040	Guanine nucleotide-binding protein subunit beta-2-like 1;Guanine nucleotide-binding protein subunit beta-2-like 1, N-terminally processed	1.68294e+06	±	3365875	1127350	±	1.54785e+06	0.66987
A0A494BA30;Q8BMJ2	Leucine--tRNA ligase, cytoplasmic	1.68204e+06	±	3364075	0	±	0	0
G3UY13;E9Q6I2;Q61730	Interleukin-1 receptor accessory protein	1.67514e+06	±	3350275	0	±	0	0
Q8BMS1	Trifunctional enzyme subunit alpha, mitochondrial;Long-chain enoyl-CoA hydratase;Long chain 3-hydroxyacyl-CoA dehydrogenase	1670550	±	2.62103e+06	872320	±	1.35858e+06	0.522175
O08553	Dihydropyrimidinase-related protein 2	1.66451e+06	±	2.89528e+06	0	±	0	0
Q5EBP8;P49312	Heterogeneous nuclear ribonucleoprotein A1;Heterogeneous nuclear ribonucleoprotein A1, N-terminally processed	1660250	±	3320500	0	±	0	0
P62830;A2A6F8	60S ribosomal protein L23	1658700	±	3317400	183436	±	410175	0.11059
Q00898	Alpha-1-antitrypsin 1-5	1658000	±	2.38497e+06	796280	±	1.78054e+06	0.480265
Q9D2V7	Coronin-7	1.65234e+06	±	3304675	0	±	0	0
F7BP55;Q9WTP6	Adenylate kinase 2, mitochondrial;Adenylate kinase 2, mitochondrial, N-terminally processed	1651500	±	3303000	91754	±	205168	0.055558
D6RGU3;Q5SRI3;Q8C3J5	Dedicator of cytokinesis protein 2	1650325	±	3300650	0	±	0	0
Q6ZWN5;F7CJS8;D3YWH9;Q9CXW7	40S ribosomal protein S9	1.64756e+06	±	3295125	370060	±	827479	0.224611
P24369	Peptidyl-prolyl cis-trans isomerase B	1644575	±	3289150	1092160	±	1.49616e+06	0.664099
Q8VDN2;D3YYN7;A0A0G2JGX4;Q8VCE0;Q6PIC6;Q6PIE5;Q9WV27;Q9Z1W8	Sodium/potassium-transporting ATPase subunit alpha-1;Sodium/potassium-transporting ATPase subunit alpha-3;Sodium/potassium-transporting ATPase subunit alpha-2;Sodium/potassium-transporting ATPase subunit alpha-4;Potassium-transporting ATPase alpha chain 2	1643425	±	3286850	184860	±	413360	0.112485
Q8CIH5	1-phosphatidylinositol 4,5-bisphosphate phosphodiesterase gamma-2	1.63634e+06	±	3272675	0	±	0	0
F6UFG6;D3YYE1;D3Z7M9;O35381;Q9EST5;Q64G17	Acidic leucine-rich nuclear phosphoprotein 32 family member A;Acidic leucine-rich nuclear phosphoprotein 32 family member B	1632200	±	1.98728e+06	725620	±	1.00897e+06	0.444566
A0A0N4SVB8;F6QKK2;Q9CQW2;Q8VEH3	ADP-ribosylation factor-like protein 8B;ADP-ribosylation factor-like protein 8A	1.61394e+06	±	2.43213e+06	0	±	0	0
P17563;Q63836;G3UYY2;A0A0R4J135;D6RHN2	Selenium-binding protein 1;Selenium-binding protein 2	1.60929e+06	±	3218575	164422	±	367659	0.102171
P70168	Importin subunit beta-1	1.60749e+06	±	3214975	0	±	0	0
A0A0N4SW34;A0A0N4SW07;P50518	V-type proton ATPase subunit E 1	1607200	±	3214400	0	±	0	0
Q8BWT1;A0A494B9J2	3-ketoacyl-CoA thiolase, mitochondrial	1596675	±	3193350	209800	±	469127	0.131398
A0A494B9Z0;A0A494BBA8;Q642K5;P62862	40S ribosomal protein S30	1593600	±	2.29076e+06	456513	±	637928	0.286466
Q8BHN3	Neutral alpha-glucosidase AB	1.59317e+06	±	2.72276e+06	173606	±	388195	0.108969
A0A3B2WCD8;Q3U0V1;A0A3B2W465	Far upstream element-binding protein 2	1.57426e+06	±	3148525	150536	±	336609	0.0956232
F6XVM5;A0A338P776;Q9DB20	ATP synthase subunit O, mitochondrial	1565275	±	3130550	630690	±	1.41027e+06	0.402926
P62737;P63268;A0A494B9T3;D3YZY0;D3Z2K3;A0A0U1RQ96	Actin, aortic smooth muscle;Actin, gamma-enteric smooth muscle	1559325	±	3118650	0	±	0	0
Q8CIN4	Serine/threonine-protein kinase PAK 2;PAK-2p27;PAK-2p34	1.55189e+06	±	3103775	223400	±	499538	0.143954
P80316;E0CZA1	T-complex protein 1 subunit epsilon	1.54781e+06	±	1.99518e+06	1555632	±	1.64864e+06	1.00505
Q3U5Q7	UMP-CMP kinase 2, mitochondrial	1545850	±	3091700	0	±	0	0
Q9WVF5;Q01279	Epidermal growth factor receptor	1.52766e+06	±	2.06552e+06	0	±	0	0
E9PUM5;E9Q8B6;E9Q8B5;Q61405		1524425	±	1.80308e+06	268080	±	599445	0.175856
Q9D8D6;B2RV77		1517325	±	3034650	0	±	0	0
Q8BP67	60S ribosomal protein L24	1514300	±	3028600	0	±	0	0
A0A0R4J043;P28825	Meprin A subunit alpha	1.4926e+06	±	2.29011e+06	1064113	±	1.18437e+06	0.712924
G3UYV7;P62858	40S ribosomal protein S28	1.49042e+06	±	1.76392e+06	1265032	±	1.48167e+06	0.848778
A0A1W2P7X3;Q561M1;Q9D358	Low molecular weight phosphotyrosine protein phosphatase	1.48804e+06	±	2976075	421918	±	580897	0.28354
A0A0R4J2B2;Q6WVG3;Q8C7J6	BTB/POZ domain-containing protein KCTD12	1485700	±	2971400	0	±	0	0
Q80VQ0	Aldehyde dehydrogenase family 3 member B1	1485050	±	2970100	0	±	0	0
A2ATR8;P97290	Plasma protease C1 inhibitor	1484900	±	2969800	0	±	0	0
A0A0R4J0P5;P97814	Proline-serine-threonine phosphatase-interacting protein 1	1484175	±	2968350	0	±	0	0
A0A2I3BPH9;A0A2I3BRN5;Q921M7	Protein FAM49B	1480650	±	1.71145e+06	0	±	0	0
A0A1B0GRR3;P62281;A0A1B0GSE8	40S ribosomal protein S11	1471125	±	2942250	268280	±	599892	0.182364
Q9EQH3	Vacuolar protein sorting-associated protein 35	1470890	±	2.59139e+06	0	±	0	0
P08032	Spectrin alpha chain, erythrocytic 1	1467650	±	2935300	1574780	±	3.52132e+06	1.07299
Q833I9		1463475	±	2926950	633100	±	1.41565e+06	0.4326
P45377;P21300	Aldose reductase-related protein 2;Aldose reductase-related protein 1	1.45688e+06	±	1.96797e+06	8419380	±	1.28781e+07	5.77905
A0A1Y7VIZ0;Q9CZE3	Ras-related protein Rab-32	1452875	±	2905750	0	±	0	0
Q9CR16	Peptidyl-prolyl cis-trans isomerase D	1.45136e+06	±	2902725	0	±	0	0
P46412;A0A1C7ZMZ5;A0A1C7ZMZ7	Glutathione peroxidase 3	1441650	±	2883300	0	±	0	0
Q9CX34	Suppressor of G2 allele of SKP1 homolog	1429100	±	2858200	721847	±	882070	0.505106
Q9CWJ9	Bifunctional purine biosynthesis protein PURH;Phosphoribosylaminoimidazolecarboxamide formyltransferase;IMP cyclohydrolase	1425525	±	2851050	260640	±	582809	0.182838
Q3TML0;Q922R8	Protein disulfide-isomerase A6	1420500	±	2841000	0	±	0	0
Q835C1		1419525	±	2839050	0	±	0	0
Q6ZQM8	UDP-glucuronosyltransferase 1-7C	1.40745e+06	±	2.34054e+06	2495980	±	4.05221e+06	1.77341
P68510	14-3-3 protein eta	1388075	±	2.15878e+06	449299	±	692823	0.323685
A0A0R4J027;P54987	Cis-aconitate decarboxylase	1355200	±	2710400	0	±	0	0
Q839F3		1.35166e+06	±	2703325	0	±	0	0
P54823	Probable ATP-dependent RNA helicase DDX6	1346850	±	2693700	0	±	0	0
P49182	Heparin cofactor 2	1.33914e+06	±	1.94129e+06	0	±	0	0
P62751	60S ribosomal protein L23a	1.33759e+06	±	2675175	0	±	0	0
P63038	60 kDa heat shock protein, mitochondrial	1335465	±	2.23177e+06	1436310	±	1.3141e+06	1.07551
P07310;A0A0J9YKD4	Creatine kinase M-type	1328325	±	2656650	1465850	±	3.27774e+06	1.10353
Q5SUA5	Unconventional myosin-Ig	1.32736e+06	±	2654725	0	±	0	0
A0A1D5RLV1;A0A571BEG4;A2A839;A2A838;A2AD32;A2A842;A2A841;P48193	Protein 4.1	1326550	±	2653100	0	±	0	0
Q835M3		1.29837e+06	±	1.47493e+06	165174	±	369340	0.127216
P24270;A2AL20	Catalase	1293575	±	2587150	360160	±	805342	0.278422
Q9CQR2	40S ribosomal protein S21	1285785	±	1.85394e+06	1629540	±	2.23395e+06	1.26735
Q9D0D4	Probable dimethyladenosine transferase	1266075	±	2532150	0	±	0	0
E9Q156	tRNA (guanine-N(7)-)-methyltransferase non-catalytic subunit Wdr4	1253400	±	2506800	0	±	0	0
Q836D5		1252625	±	2505250	0	±	0	0
P05366;A0A1B0GQV5;P05367	Serum amyloid A-1 protein;Serum amyloid A-2 protein;Amyloid protein A	1.25243e+06	±	1.29805e+06	275490	±	616014	0.219965
Q80ZS7;Q9D0M5;P63168	Dynein light chain 2, cytoplasmic;Dynein light chain 1, cytoplasmic	1248925	±	2497850	0	±	0	0
B1AXP0;B1AXN9;E9PWV3;Q505N6;F6RQA2;F6Q8A4;P18653;P18654;F6UG16;B1AXN8;B2GVN8;A2CEE8;B1AXN5;B1B0X1;A0A338P701;G3UZI3;A2CEE6;A2CEE5;E9PUP0;A2CEE7;E9QK39;Q9WUT3;Q7TPS0	Ribosomal protein S6 kinase;Ribosomal protein S6 kinase alpha-1;Ribosomal protein S6 kinase alpha-3;Ribosomal protein S6 kinase alpha-2;Ribosomal protein S6 kinase alpha-6	1.24449e+06	±	2488975	0	±	0	0
P28867;Q1MX41;Q1MX43;Q1MX40;Q1MX42;F8WGT6;Q02111	Protein kinase C delta type;Protein kinase C delta type regulatory subunit;Protein kinase C delta type catalytic subunit;Protein kinase C;Protein kinase C theta type	1.21966e+06	±	1.79166e+06	0	±	0	0
P63328	Serine/threonine-protein phosphatase 2B catalytic subunit alpha isoform	1215350	±	2430700	0	±	0	0
Q9D0I9	Arginine--tRNA ligase, cytoplasmic	1.21211e+06	±	2424225	0	±	0	0
P12246	Serum amyloid P-component	1208975	±	1.70508e+06	0	±	0	0
A0A087WSF5;G5E8E1;A0A087WNU6;E9Q9T1;A0A087WPK3;Q3UZ39	Leucine-rich repeat flightless-interacting protein 1	1208875	±	2417750	0	±	0	0
O09114	Prostaglandin-H2 D-isomerase	1.20311e+06	±	2406225	1753220	±	1.6841e+06	1.45724
D3Z4N2;F8WIP8;P10923	Osteopontin	1197665	±	1.93517e+06	1799210	±	1.81605e+06	1.50226
Q834T3		1.19374e+06	±	2387475	0	±	0	0
Q9WU78	Programmed cell death 6-interacting protein	1181875	±	2363750	0	±	0	0
Q9CR86	Calcium-regulated heat stable protein 1	1177100	±	2354200	0	±	0	0
P32037	Solute carrier family 2, facilitated glucose transporter member 3	1161850	±	2323700	0	±	0	0
D3YYH3;D3YUE8;D3Z223;P15327	Phosphoglycerate mutase;Bisphosphoglycerate mutase	1155950	±	2311900	750610	±	1.67841e+06	0.649345
A2AB60;A0A1W2P6X3;Q9JL26	Formin-like protein 1	1155250	±	2310500	0	±	0	0
Q8CHP8	Phosphoglycolate phosphatase	1.14319e+06	±	2286375	0	±	0	0
Q80UP5;F7B209;Q6PD24	Ankyrin repeat domain-containing protein 13A;Ankyrin repeat domain-containing protein 13D	1130475	±	2260950	0	±	0	0
A0A0R4J083;P51174	Long-chain specific acyl-CoA dehydrogenase, mitochondrial	1.12391e+06	±	1.33306e+06	624580	±	1.3966e+06	0.555719
P60766	Cell division control protein 42 homolog	1117800	±	2235600	922840	±	2.06353e+06	0.825586
P57787	Monocarboxylate transporter 4	1111550	±	2223100	0	±	0	0
Q3UDR8	Protein YIPF3;Protein YIPF3, N-terminally processed	1.10858e+06	±	1.33521e+06	1278070	±	830553	1.15289
Q78PY7;Q3TJ56	Staphylococcal nuclease domain-containing protein 1	1105475	±	2210950	0	±	0	0
Q82Z47		1083875	±	2167750	0	±	0	0
E9Q1Y9;CON__Q61726;Q9ERE2;P97861;Q6IMF0;CON__P78386;Q9Z2T6;CON__O43790;CON__Q6NT21;CON__P78385;CON__Q14533	Keratin, type II cuticular Hb1;Keratin, type II cuticular Hb6;Keratin, type II cuticular Hb3;Keratin, type II cuticular Hb5	1.06559e+06	±	2131175	0	±	0	0
P97797	Tyrosine-protein phosphatase non-receptor type substrate 1	1065025	±	2130050	0	±	0	0
H3BJP2;H3BK43;H3BLJ9;H3BJL6;H3BKH6;Q9R0P3	S-formylglutathione hydrolase	1063000	±	2126000	505848	±	717964	0.475868
P53810;F8WGG5;J3QQ30;J3QPW1	Phosphatidylinositol transfer protein alpha isoform	1.06201e+06	±	2124025	0	±	0	0
G3UY11;G5E8J2;B7ZW98;E9QNT8;G8JL84;D3YTV8;D3Z5M4;Q0VGY9;A0A0R4J1N7;Q02357;D6RJ51;F7D1P5	Ankyrin-1	1060900	±	2121800	469220	±	1.04921e+06	0.442285
H7BX22;P34022	Ran-specific GTPase-activating protein	1060135	±	1.5286e+06	444284	±	617259	0.419082
Q839F8		1057400	±	1.22205e+06	0	±	0	0
P47962;D3YYV8	60S ribosomal protein L5	1.05126e+06	±	2102525	676572	±	1.22951e+06	0.64358
A0A1L1STC6;Q6ZWR6;A0A1L1SRV6	Nesprin-1	1049600	±	2099200	409840	±	916430	0.390473
E9PZW0;E9Q557	Desmoplakin	1046440	±	914748	1479912	±	1.59887e+06	1.41423
Q3U2G2;Q61316	Heat shock 70 kDa protein 4	1040000	±	2080000	485960	±	1.08664e+06	0.467269
A0A1B0GSB2;P19253;A0A1B0GQW6;A0A1B0GSL5;A0A1B0GSC2;A0A1B0GRH1;A0A1B0GSF0;A0A1B0GSQ6;A0A1B0GTA1;A0A1B0GS68	60S ribosomal protein L13a	1.02676e+06	±	2053525	161330	±	360745	0.157125
A0A1L1SQS5;Q80XP8	Protein FAM76B	1024725	±	2049450	0	±	0	0
P33267;A0A0U1RPL9	Cytochrome P450 2F2	1010075	±	2020150	0	±	0	0
P0DM31		995362	±	1.36204e+06	0	±	0	0
O70475;D3YXP9	UDP-glucose 6-dehydrogenase	979826	±	930531	5561320	±	5.85409e+06	5.67582
Q9DBS1	Transmembrane protein 43	977038	±	1954075	0	±	0	0
D3Z124;D3Z6R9;P28352	DNA-(apurinic or apyrimidinic site) lyase;DNA-(apurinic or apyrimidinic site) lyase, mitochondrial	976500	±	1953000	0	±	0	0
A2A817;A2A816;A2A815;A2A813;Q99LX0	Protein deglycase DJ-1	975725	±	1951450	577390	±	820928	0.591755
A0A571BEU1;Q6IRU2	Tropomyosin alpha-4 chain	957350	±	1914700	0	±	0	0
Q839E9		949725	±	1899450	0	±	0	0
Q3TF41;Q8BSH9;P28656	Nucleosome assembly protein 1-like 1	940725	±	1881450	0	±	0	0
P07361	Alpha-1-acid glycoprotein 2	940638	±	1881275	0	±	0	0
F8WGM5;Q64324	Syntaxin-binding protein 2	938550	±	1877100	0	±	0	0
G3UWY2;Q07174	Mitogen-activated protein kinase kinase kinase 8	935825	±	1871650	0	±	0	0
A0A0G2JGD2;P07091	Protein S100-A4	934175	±	1868350	0	±	0	0
F6ZSB7;Q61753	D-3-phosphoglycerate dehydrogenase	928725	±	1857450	102736	±	229725	0.11062
O55142	60S ribosomal protein L35a	922450	±	1844900	958920	±	1.4683e+06	1.03954
E9Q397;Q3UGX2;P15508	Spectrin beta chain, erythrocytic	912900	±	1825800	397440	±	888703	0.43536
B1B1A8;Q6PDN3	Myosin light chain kinase, smooth muscle;Myosin light chain kinase, smooth muscle, deglutamylated form	900868	±	800172	173308	±	387528	0.192379
Q8R0X7;D6REF7	Sphingosine-1-phosphate lyase 1	899925	±	1799850	406640	±	909275	0.45186
Q8R121	Protein Z-dependent protease inhibitor	880125	±	1760250	0	±	0	0
E9Q3W4;Q9QXS1;A0A3B2W7J8;A0A2I3BRT4;Q8R0W0	Plectin	877600	±	1755200	590253	±	808596	0.672576
Q5SS83;Q60634	Flotillin-2	877375	±	1754750	0	±	0	0
Q6ZQ38	Cullin-associated NEDD8-dissociated protein 1	853975	±	1707950	526430	±	724138	0.616447
A0A087WPL5;E9QNN1;O70133;Q3UR42	ATP-dependent RNA helicase A	849875	±	1699750	0	±	0	0
Q8BGX0	E3 ubiquitin-protein ligase TRIM23	845000	±	1690000	0	±	0	0
Q833I8;Q834V5		844588	±	1689175	0	±	0	0
A6X925;B7ZBY6;B7ZBY7;E9PY39;Q9D2M8;Q9CZY3;B2KF55	Ubiquitin-conjugating enzyme E2 variant 2;Ubiquitin-conjugating enzyme E2 variant 1	829612	±	1659225	262620	±	587236	0.316557
B2KF34;A0A3B2WB60;P47811	Mitogen-activated protein kinase 14	826925	±	1653850	0	±	0	0
Q837F9		826350	±	1652700	0	±	0	0
A0A286YCZ3;E9Q390;A0A286YDF5;Q69ZN7;A0A286YE65	Myoferlin	826025	±	1652050	683210	±	1.5277e+06	0.827106
P84078;P61205;Q8BSL7;D3YV25;E9Q2C2;A2A6T9	ADP-ribosylation factor 1;ADP-ribosylation factor 3;ADP-ribosylation factor 2	820475	±	1640950	0	±	0	0
P62814	V-type proton ATPase subunit B, brain isoform	814838	±	1629675	0	±	0	0
Q8CB12;Q3TR54;Q2KHK6	Gasdermin-C3;Gasdermin-C4;Gasdermin-C2	806288	±	1612575	198388	±	443609	0.246051
A2CEK3;Q9D0F9	Phosphoglucomutase-1	804662	±	1.22646e+06	1235400	±	2.23246e+06	1.5353
Q830Q6		791688	±	1583375	0	±	0	0
Q8VBT6	Apolipoprotein B receptor	786600	±	1573200	0	±	0	0
D3Z1H8;D3Z1H9;Q9JL62	Glycolipid transfer protein	778125	±	1556250	348740	±	779806	0.44818
Q8K469;P11928	2-5-oligoadenylate synthase 1A	776450	±	1552900	0	±	0	0
P46467;Q8VEJ9;Q8BPY9	Vacuolar protein sorting-associated protein 4B;Vacuolar protein sorting-associated protein 4A;Fidgetin-like protein 1	775250	±	1550500	0	±	0	0
Q8VDU4;E9PXI0;P27870;Q9R0C8	Proto-oncogene vav;Guanine nucleotide exchange factor VAV3	767450	±	1534900	0	±	0	0
Q3UVK0;G8JL46;F6TQS9	Endoplasmic reticulum metallopeptidase 1	765300	±	1530600	94775	±	211923	0.12384
A0A1L1STN8;P37804	Transgelin	756988	±	1513975	0	±	0	0
Q8BPU7	Engulfment and cell motility protein 1	738138	±	1476275	0	±	0	0
A0A1W2P7G2;A0A1W2P6N2;Q9D1J3	SAP domain-containing ribonucleoprotein	735725	±	1471450	0	±	0	0
A0A2I3BRQ3;CON__Q0V8M9;Q61704	Inter-alpha-trypsin inhibitor heavy chain H3	726575	±	1453150	0	±	0	0
P68134;P68033	Actin, alpha skeletal muscle;Actin, alpha cardiac muscle 1	725969	±	994593	823006	±	1.5595e+06	1.13367
P00493	Hypoxanthine-guanine phosphoribosyltransferase	725275	±	1450550	0	±	0	0
A0A0G2JGX3;Q9CQQ7	ATP synthase F(0) complex subunit B1, mitochondrial	723838	±	1447675	163608	±	365839	0.226029
Q8K1H9	Odorant-binding protein 2a	723650	±	1447300	0	±	0	0
G3UZ22;G3UY93;Q9Z1Q9	Valine--tRNA ligase	722925	±	1445850	0	±	0	0
P50396;D6RI86	Rab GDP dissociation inhibitor alpha	722200	±	1444400	157243	±	351606	0.217728
P48678;D3YUF7	Prelamin-A/C;Lamin-A/C	719575	±	1439150	1359680	±	2.02993e+06	1.88956
Q05816	Fatty acid-binding protein, epidermal	699850	±	1399700	2411020	±	4.53592e+06	3.44505
A0A0G2JG10;Q497W9;O35286	Pre-mRNA-splicing factor ATP-dependent RNA helicase DHX15	699625	±	1399250	0	±	0	0
Q3UVF6		696200	±	1392400	0	±	0	0
Q8K1K2;P62196	26S protease regulatory subunit 8	691525	±	1383050	0	±	0	0
P39039;A0A2C9F2B6	Mannose-binding protein A	688500	±	803599	0	±	0	0
A0A1W2P733;Q922D8	C-1-tetrahydrofolate synthase, cytoplasmic;Methylenetetrahydrofolate dehydrogenase;Methenyltetrahydrofolate cyclohydrolase;Formyltetrahydrofolate synthetase;C-1-tetrahydrofolate synthase, cytoplasmic, N-terminally processed	687425	±	1374850	0	±	0	0
P62627	Dynein light chain roadblock-type 1	687100	±	1374200	310840	±	695059	0.452394
P00688;CON__Q3MHH8;P00687	Pancreatic alpha-amylase;Alpha-amylase 1	686200	±	1372400	0	±	0	0
Q835R7		679788	±	1359575	331140	±	740452	0.487123
P14115	60S ribosomal protein L27a	679762	±	1359525	2921580	±	3.47395e+06	4.29794
Q82Z45		672900	±	1345800	0	±	0	0
Q830Q5		666388	±	1332775	204320	±	456873	0.306608
Q61335	B-cell receptor-associated protein 31	664468	±	1.03172e+06	697320	±	1.04366e+06	1.04944
B7ZCL9;B7ZCL8;A2AN84;P70290	55 kDa erythrocyte membrane protein	662725	±	1325450	0	±	0	0
A0A1W2P6Y4;Q8R4U0	Stabilin-2;Short form stabilin-2	656475	±	1312950	0	±	0	0
P50580	Proliferation-associated protein 2G4	650838	±	1301675	171890	±	384358	0.264106
Q9D0J8	Parathymosin	650300	±	770084	476591	±	693294	0.732879
P11031	Activated RNA polymerase II transcriptional coactivator p15	624388	±	1248775	0	±	0	0
A0A0R4J0S8;Q80YF6	Uroplakin-3b	621712	±	1243425	377320	±	843713	0.606904
A2AQC8		611750	±	1223500	0	±	0	0
Q62465	Synaptic vesicle membrane protein VAT-1 homolog	606300	±	1212600	431716	±	703138	0.71205
Q834N1		591812	±	1183625	0	±	0	0
P62702;V9GWY0	40S ribosomal protein S4, X isoform	589688	±	1179375	1238210	±	2.76872e+06	2.09977
A2APF3	Transcriptional repressor CTCFL	586975	±	1173950	0	±	0	0
Q91Z98	Chitinase-like protein 4	580622	±	852505	0	±	0	0
P14847	C-reactive protein	571650	±	1143300	0	±	0	0
J3QP71;K3W4Q8;P18572	Basigin	569525	±	1139050	203366	±	454740	0.35708
Q60648	Ganglioside GM2 activator	568975	±	1137950	226480	±	506425	0.398049
Q9D898	Actin-related protein 2/3 complex subunit 5-like protein	562862	±	1125725	259800	±	361085	0.461569
Q9R1Z7	6-pyruvoyl tetrahydrobiopterin synthase	556625	±	1113250	0	±	0	0
Q9WVK5	Beta-1,4-galactosyltransferase 6;Glucosylceramide beta-1,4-galactosyltransferase	551325	±	1102650	0	±	0	0
A0A075B5N7;A0A140T8Q3;A0A140T8P1;A0A140T8N7;A0A140T8N5;A0A140T8M5;A0A0G2JGY3;P01633	Ig kappa chain V19-17	545700	±	1091400	0	±	0	0
P06801;Q3TQP6	NADP-dependent malic enzyme;Malic enzyme	539614	±	409388	3532585	±	6.23638e+06	6.54651
E9PUZ8;P08607	C4b-binding protein	518360	±	468064	0	±	0	0
Q6BCL1	PML-RARA-regulated adapter molecule 1	513612	±	1027225	0	±	0	0
P32848	Parvalbumin alpha	513488	±	1026975	405500	±	906726	0.789698
Q5DTT4	Retrotransposon gag domain-containing protein 4	506700	±	1013400	0	±	0	0
E9Q3X0;Q9EQK5	Major vault protein	496225	±	992450	187212	±	418619	0.377272
P23530		492652	±	985305	127439	±	284962	0.258679
P68369;P05214	Tubulin alpha-1A chain;Tubulin alpha-3 chain	490250	±	980500	0	±	0	0
A2A998;A2A997;Q8K182	Complement component C8 alpha chain	489400	±	978800	0	±	0	0
Q5XJY5	Coatomer subunit delta	485150	±	970300	180987	±	404699	0.373054
A0A171EBL2;E9Q555	E3 ubiquitin-protein ligase RNF213	480125	±	960250	0	±	0	0
A0A2K6EDK8;Q8C255	Dipeptidase 2	473475	±	946950	0	±	0	0
Q839G5		459538	±	919075	517070	±	1.1562e+06	1.1252
Q835M1		442900	±	885800	0	±	0	0
Q9DC51	Guanine nucleotide-binding protein G(k) subunit alpha	437600	±	875200	0	±	0	0
Q835M2		433538	±	867075	0	±	0	0
P14106	Complement C1q subcomponent subunit B	431100	±	862200	0	±	0	0
Q62095;P16381;Q62167	ATP-dependent RNA helicase DDX3Y;Putative ATP-dependent RNA helicase Pl10;ATP-dependent RNA helicase DDX3X	427700	±	855400	0	±	0	0
Q7TSV4;A0A0G2JG04	Phosphoglucomutase-2	425400	±	850800	579869	±	856467	1.36311
Q82YW5		421625	±	843250	0	±	0	0
Q8BHJ8		409200	±	818400	0	±	0	0
A0A1L1SUU4;Q9ERN0	Secretory carrier-associated membrane protein 2	406600	±	813200	0	±	0	0
Q8VDM4	26S proteasome non-ATPase regulatory subunit 2	379125	±	758250	726524	±	1.25799e+06	1.91632
Q9JII6;B1AXW3	Alcohol dehydrogenase [NADP(+)]	371578	±	441219	1050190	±	1.79948e+06	2.8263
Q3U367;Q9JLJ2	4-trimethylaminobutyraldehyde dehydrogenase	365400	±	730800	514030	±	1.14941e+06	1.40676
Q834T5		360100	±	720200	0	±	0	0
Q3V0M1;B7ZWJ3		357150	±	714300	0	±	0	0
Q835M4		338088	±	676175	0	±	0	0
A2AQB2;A2AQA9;E9Q1W3;A0A571BF46;A0A571BF58		325775	±	651550	0	±	0	0
P32020	Non-specific lipid-transfer protein	316875	±	633750	479070	±	656065	1.51186
O08439		307200	±	614400	0	±	0	0
Q04447	Creatine kinase B-type	304950	±	609900	0	±	0	0
Q66JV4;Q80YR9	RNA-binding protein 12B-B;RNA-binding protein 12B-A	304075	±	608150	0	±	0	0
G3UYI4;G3UYL3;Q8BG32	26S proteasome non-ATPase regulatory subunit 11	292075	±	584150	1827266	±	2.20181e+06	6.25615
Q02257	Junction plakoglobin	290075	±	580150	1067800	±	1.47496e+06	3.68112
Q5SQG5;P67778	Prohibitin	281275	±	562550	292544	±	401404	1.04006
P21550	Beta-enolase	280525	±	561050	0	±	0	0
A0A075B5J9;A0A075B5K3;A0A0G2JFA8;A0A0G2JDN5		268150	±	536300	0	±	0	0
Q93EU6		263025	±	526050	160693	±	359320	0.610942
E9Q3E1;F6QPV9;J3QMK6	Aldehyde dehydrogenase	260625	±	521250	776670	±	1.73669e+06	2.98003
Q99JY0;D3YXU1	Trifunctional enzyme subunit beta, mitochondrial;3-ketoacyl-CoA thiolase	259700	±	519400	848488	±	1.04253e+06	3.26719
A2A547;P84099	Ribosomal protein L19;60S ribosomal protein L19	249852	±	499705	566520	±	1.26678e+06	2.26742
Q839G1		229150	±	458300	0	±	0	0
E9Q9J4;Q6ZQB6	Inositol hexakisphosphate and diphosphoinositol-pentakisphosphate kinase 2	224582	±	449165	0	±	0	0
Q82YW3		221922	±	443845	0	±	0	0
A0A494BA81;K7N6B6;E9PXM3		219862	±	439725	0	±	0	0
P25322	G1/S-specific cyclin-D1	217116	±	434232	0	±	0	0
P14602;D3YZ06	Heat shock protein beta-1	206635	±	413270	1190980	±	1.63377e+06	5.76369
O35594	Intraflagellar transport protein 81 homolog	193475	±	386950	0	±	0	0
P70441	Na(+)/H(+) exchange regulatory cofactor NHE-RF1	186422	±	260040	317002	±	440012	1.70045
Q78PG9	Coiled-coil domain-containing protein 25	182022	±	364045	0	±	0	0
Q9D819	Inorganic pyrophosphatase	178035	±	356070	1242320	±	1.76873e+06	6.97795
A0A0A6YW21;Q9D7S7	60S ribosomal protein L22-like 1	171822	±	343645	0	±	0	0
E9Q499;F2Z405;Q5I2A0	Serine protease inhibitor A3G	168438	±	336875	0	±	0	0
P68254	14-3-3 protein theta	158359	±	316718	290820	±	401752	1.83646
F7C106;A0A0A6YVR0;Q9D881;P19536	Cytochrome c oxidase subunit 5B, mitochondrial	153378	±	306755	273780	±	612191	1.78501
Q839E1		140855	±	281710	0	±	0	0
A0A0A6YW72		139462	±	278925	0	±	0	0
Q835J8		116352	±	232705	0	±	0	0
Q9CR04	Huntingtin-interacting protein M	85257.5	±	170515	0	±	0	0
A0A338P742;A0A338P6Y7;Q9D7G4	Protein EURL homolog	60750	±	121500	0	±	0	0
Q80X90	Filamin-B	0	±	0	5546360	±	8.73301e+06	N/A
A0A0U1RNJ1;P19096	Fatty acid synthase;[Acyl-carrier-protein] S-acetyltransferase;[Acyl-carrier-protein] S-malonyltransferase;3-oxoacyl-[acyl-carrier-protein] synthase;3-oxoacyl-[acyl-carrier-protein] reductase;3-hydroxyacyl-[acyl-carrier-protein] dehydratase;Enoyl-[acyl-carrier-protein] reductase;Oleoyl-[acyl-carrier-protein] hydrolase	0	±	0	768352	±	1.31304e+06	N/A
P47739;B1ATI6	Aldehyde dehydrogenase, dimeric NADP-preferring	0	±	0	2598500	±	3.57877e+06	N/A
Q61696;P17879	Heat shock 70 kDa protein 1A;Heat shock 70 kDa protein 1B	0	±	0	1445540	±	1.98585e+06	N/A
O55234;Q8BTY5	Proteasome subunit beta type-5	0	±	0	772802	±	855942	N/A
A0A338P684;P48758	Carbonyl reductase [NADPH] 1	0	±	0	818320	±	1.14323e+06	N/A
A0A087WRJ2;A0A087WPF8;A0A087WSR2;E9QN99;A0A087WP24;Q8VCR7;A0A1L1SRH5;A0A1L1SUX1	Alpha/beta hydrolase domain-containing protein 14B	0	±	0	1409490	±	2.32158e+06	N/A
Q921L6;Q60598	Src substrate cortactin	0	±	0	1552220	±	1.98177e+06	N/A
F8WIV2;Q60854;E9PYY0;E9Q3Y1;E9Q6X2;E9Q108;E9Q0P9;K7E6F1;E9PZQ9;E9Q4R2	Serpin B6	0	±	0	1497220	±	2.17137e+06	N/A
Q8QZY1	Eukaryotic translation initiation factor 3 subunit L	0	±	0	241216	±	539375	N/A
Q8BFR5;A0A0U1RNQ6	Elongation factor Tu, mitochondrial	0	±	0	327890	±	510060	N/A
D3YVG1;D3Z3V3;P42209	Septin-1	0	±	0	0	±	0	N/A
P30115;Q6P8Q0;P13745;A0A087WQI6;D3Z6A6;D3YZV3;P10648	Glutathione S-transferase A3;Glutathione S-transferase;Glutathione S-transferase A1;Glutathione S-transferase A1, N-terminally processed	0	±	0	603680	±	864164	N/A
E9QAY6;A0A0U1RP81;E9Q800;Q8CAQ8	MICOS complex subunit Mic60	0	±	0	205830	±	460250	N/A
P61982	14-3-3 protein gamma;14-3-3 protein gamma, N-terminally processed	0	±	0	122892	±	274795	N/A
Q9JKX8	Uroplakin-3a	0	±	0	668640	±	1.49512e+06	N/A
Q99KJ8	Dynactin subunit 2	0	±	0	354682	±	497334	N/A
Q8BGQ7	Alanine--tRNA ligase, cytoplasmic	0	±	0	266127	±	396579	N/A
Q9CXW4;A2BH06	60S ribosomal protein L11	0	±	0	1390280	±	2.29699e+06	N/A
Q9WUK2	Eukaryotic translation initiation factor 4H	0	±	0	427344	±	588189	N/A
Q99KI0	Aconitate hydratase, mitochondrial	0	±	0	429847	±	602875	N/A
Q80W54	CAAX prenyl protease 1 homolog	0	±	0	146125	±	326745	N/A
Q9WTL2	Ras-related protein Rab-25	0	±	0	327950	±	496493	N/A
P10922	Histone H1.0;Histone H1.0, N-terminally processed	0	±	0	406002	±	568388	N/A
A0A0N4SUQ1;A0A0N4SUN8;A0A0N4SWH2;A0A0N4SV32;Q3UMP4;Q9CY58;A0A0N4SVK5;A0A0N4SV40	Plasminogen activator inhibitor 1 RNA-binding protein	0	±	0	767400	±	1.71596e+06	N/A
Q9D997;Q9QZ08;D3YXG2	N-acetyl-D-glucosamine kinase	0	±	0	193248	±	432116	N/A
A0A1Y7VLY5;A0A1Y7VKA0;A0A1Y7VKC6;Q9DB29	Isoamyl acetate-hydrolyzing esterase 1 homolog	0	±	0	516430	±	886737	N/A
Q9Z2M7	Phosphomannomutase 2	0	±	0	569896	±	896662	N/A
Q3TN85;Q8CAP3;P54726;P54728	UV excision repair protein RAD23 homolog A;UV excision repair protein RAD23 homolog B	0	±	0	752913	±	1.25664e+06	N/A
Q8CF02	Protein FAM25C	0	±	0	513920	±	1.14916e+06	N/A
Q8R050;F7CE88;Q149F3	Eukaryotic peptide chain release factor GTP-binding subunit ERF3A;Eukaryotic peptide chain release factor GTP-binding subunit ERF3B	0	±	0	274410	±	613599	N/A
D3YU32		0	±	0	0	±	0	N/A
S4R1E5;O70325	Glutathione peroxidase;Phospholipid hydroperoxide glutathione peroxidase, mitochondrial	0	±	0	132638	±	296588	N/A
Q99L45	Eukaryotic translation initiation factor 2 subunit 2	0	±	0	359100	±	802972	N/A
P30416	Peptidyl-prolyl cis-trans isomerase FKBP4;Peptidyl-prolyl cis-trans isomerase FKBP4, N-terminally processed	0	±	0	304863	±	466713	N/A
Q8BJY1	26S proteasome non-ATPase regulatory subunit 5	0	±	0	1147920	±	1.65908e+06	N/A
O55042;Q91ZZ3	Alpha-synuclein;Beta-synuclein	0	±	0	570520	±	1.27572e+06	N/A
O55022	Membrane-associated progesterone receptor component 1	0	±	0	706671	±	994633	N/A
Q9EQ20	Methylmalonate-semialdehyde dehydrogenase [acylating], mitochondrial	0	±	0	310492	±	457848	N/A
F6ZTG3;E9Q197;Q9CPV4	Glyoxalase domain-containing protein 4	0	±	0	1143140	±	1.62571e+06	N/A
Q6PCS8		0	±	0	52530	±	117461	N/A
Q8K2B3	Succinate dehydrogenase [ubiquinone] flavoprotein subunit, mitochondrial	0	±	0	248347	±	340071	N/A
A3KMP2	Tetratricopeptide repeat protein 38	0	±	0	385803	±	549370	N/A
P61027	Ras-related protein Rab-10	0	±	0	1511200	±	1.71127e+06	N/A
G3UYL6;G3UX05;Q99L20;G3UYJ7		0	±	0	380540	±	850913	N/A
A0A338P6J9;Q921U7;Q8C281;Q8CE04;Q8CE80;P51125	Calpastatin	0	±	0	486420	±	1.08767e+06	N/A
A0A494BBE3;G3X8R0;Q60870	Receptor expression-enhancing protein;Receptor expression-enhancing protein 5	0	±	0	647240	±	941565	N/A
G5DDB7;Q8R3B1	Phosphoinositide phospholipase C;1-phosphatidylinositol 4,5-bisphosphate phosphodiesterase delta-1	0	±	0	165275	±	369566	N/A
P54116	Erythrocyte band 7 integral membrane protein	0	±	0	369360	±	825914	N/A
A0A2I3BRG2;S4R295;A0A0R4J049;Q8CIG8	Protein arginine N-methyltransferase 5	0	±	0	133218	±	297885	N/A
D3YX76;P15626	Glutathione S-transferase Mu 2	0	±	0	202660	±	453162	N/A
A0A1B0GR41;A0A1C7CYU3;Q02819	Nucleobindin-1	0	±	0	84920	±	189887	N/A
Q3U4W8;P56399	Ubiquitin carboxyl-terminal hydrolase;Ubiquitin carboxyl-terminal hydrolase 5	0	±	0	167496	±	374532	N/A
A2AE91;Q8R5I6		0	±	0	642430	±	879900	N/A
A0A2R8VHP3;Q6IFZ8;D3Z6R0		0	±	0	684110	±	1.52972e+06	N/A
A0A0U1RNR3;A0A0U1RNK9;A0A0U1RNP5;A0A0N4SVE0;Q9DCW4	Electron transfer flavoprotein subunit beta	0	±	0	274701	±	383096	N/A
P41105	60S ribosomal protein L28	0	±	0	643950	±	1.24477e+06	N/A
Q3TYL7;Q9QYJ3	DnaJ homolog subfamily B member 1	0	±	0	80830	±	180741	N/A
Q9R0Q6	Actin-related protein 2/3 complex subunit 1A	0	±	0	486332	±	711322	N/A
Q64339	Ubiquitin-like protein ISG15	0	±	0	277830	±	621247	N/A
Q839E8		0	±	0	186798	±	417693	N/A
Q6A0A2	La-related protein 4B	0	±	0	0	±	0	N/A
A8R0W3		0	±	0	2066710	±	4.6213e+06	N/A
A0A1D5RME4;A0A1D5RLW5;A0A1D5RM85;P62717	60S ribosomal protein L18a	0	±	0	888864	±	978411	N/A
P62911	60S ribosomal protein L32	0	±	0	297780	±	665856	N/A
O70451	Monocarboxylate transporter 2	0	±	0	1747980	±	3.9086e+06	N/A
Q3V3R8;A0A0J9YUI1;A0A0J9YU07;P61087	Ubiquitin-conjugating enzyme E2 K	0	±	0	241062	±	539031	N/A
Q8CHW4	Translation initiation factor eIF-2B subunit epsilon	0	±	0	113182	±	253083	N/A
A8Y5J3;Q9CWS4	Integrator complex subunit 11	0	±	0	0	±	0	N/A
D3Z789;D3Z6Z0;Q78ZM0;O70492	Sorting nexin-3	0	±	0	288210	±	644457	N/A
Q9JHI5	Isovaleryl-CoA dehydrogenase, mitochondrial	0	±	0	115718	±	258753	N/A
A8XY17;A2A4J8;Q9CQ80	Vacuolar protein-sorting-associated protein 25	0	±	0	211980	±	474002	N/A
Q82YQ4;O32795		0	±	0	0	±	0	N/A
P03958	Adenosine deaminase	0	±	0	0	±	0	N/A
O88593	Peptidoglycan recognition protein 1	0	±	0	1225160	±	2.73954e+06	N/A
Q9CQX2	Cytochrome b5 type B	0	±	0	314980	±	704317	N/A
D6RFU9;O09117	Synaptophysin-like protein 1	0	±	0	148406	±	331846	N/A
Q99P58	Ras-related protein Rab-27B	0	±	0	387806	±	553779	N/A
K3W4R2;Q6URW6;A0A140LHX1	Myosin-14	0	±	0	188210	±	420850	N/A
Q82YV4		0	±	0	0	±	0	N/A
A0A0G2JEZ3;E9PZM4	Chromodomain-helicase-DNA-binding protein 2	0	±	0	8832600	±	1.97503e+07	N/A
Q9WUH2	LIM/homeobox protein Lhx9	0	±	0	738920	±	1.65228e+06	N/A
F6Q2E3;A0A087WPH7;A2AGN7;B7ZCF1;O88685	26S protease regulatory subunit 6A	0	±	0	148460	±	331967	N/A
A0A0A0MQ73;Q6PDK2	Histone-lysine N-methyltransferase;Histone-lysine N-methyltransferase 2D	0	±	0	140782	±	314798	N/A
A0A0A0MQ82;Q9WTR2	Mitogen-activated protein kinase kinase kinase 6	0	±	0	0	±	0	N/A
A0A0G2JGQ4;P54729	NEDD8 ultimate buster 1	0	±	0	0	±	0	N/A
F6W0I8;Q8K2J1;A0A0R4J0W4;Q8CI85	Carbonic anhydrase 12	0	±	0	547050	±	754044	N/A
A0A0U1RP13;Q8VDP6	CDP-diacylglycerol--inositol 3-phosphatidyltransferase	0	±	0	129796	±	290233	N/A
A0A217FL67;Q5SQM0;Q8BQM8	Echinoderm microtubule-associated protein-like 6;Echinoderm microtubule-associated protein-like 5	0	±	0	0	±	0	N/A
A0A2R8VHF9;E9QPE7;A0A338P6K2;O08638	Myosin-11	0	±	0	288520	±	645150	N/A
A0A494B9Q2		0	±	0	0	±	0	N/A
A2A8D1;E9Q8B3;Q5U458	DnaJ homolog subfamily C member 11	0	±	0	171756	±	384058	N/A
B1ASZ3;Q9WU65;Q64516	Glycerol kinase 2;Glycerol kinase	0	±	0	0	±	0	N/A
B8JK51;Q8K015	Centromere protein O	0	±	0	0	±	0	N/A
D3YV69;P61294;P35279	Ras-related protein Rab-6B;Ras-related protein Rab-6A	0	±	0	0	±	0	N/A
F6YY19;P58501	PAX3- and PAX7-binding protein 1	0	±	0	0	±	0	N/A
F7BYZ4;Q9JI11	Serine/threonine-protein kinase 4;Serine/threonine-protein kinase 4 37kDa subunit;Serine/threonine-protein kinase 4 18kDa subunit	0	±	0	0	±	0	N/A
J3QJU0;Q68SN8	Fc receptor-like protein 5	0	±	0	317880	±	710801	N/A
K4DI77;Q5ND34	WD repeat-containing protein 81	0	±	0	0	±	0	N/A
K9J7B2;Q64435;D3YZE6;D3Z7G0;D3YZ96;G3UZC9;B2RT14;E9PXN7;D3Z748;Q62452;P70691;Q63886;D6RH94;D3YWN0;D3YUP6;Q8BJL9;Q91WH2;Q8VCN3;Q8K169;Q3UEP4;P17717	UDP-glucuronosyltransferase 1-6;UDP-glucuronosyltransferase 1-9;UDP-glucuronosyltransferase 1-2;UDP-glucuronosyltransferase 1-1	0	±	0	331380	±	740988	N/A
O35239	Tyrosine-protein phosphatase non-receptor type 9	0	±	0	106582	±	238325	N/A
O35945	Aldehyde dehydrogenase, cytosolic 1	0	±	0	939770	±	1.29932e+06	N/A
Q8BG13;O89086	RNA-binding protein 3	0	±	0	268120	±	599535	N/A
P17156	Heat shock-related 70 kDa protein 2	0	±	0	262420	±	586789	N/A
P23116	Eukaryotic translation initiation factor 3 subunit A	0	±	0	12416600	±	2.77644e+07	N/A
P32240	Prostaglandin E2 receptor EP4 subtype	0	±	0	68654	±	153515	N/A
P36922		0	±	0	371240	±	830118	N/A
Q3TRH2;Q9D8W5	26S proteasome non-ATPase regulatory subunit 12	0	±	0	304660	±	681240	N/A
Q3UWM4	Lysine-specific demethylase 7A	0	±	0	0	±	0	N/A
Q61102	ATP-binding cassette sub-family B member 7, mitochondrial	0	±	0	0	±	0	N/A
Q61578	NADPH:adrenodoxin oxidoreductase, mitochondrial	0	±	0	72474	±	162057	N/A
Q6P9P0	Protein FAM178A	0	±	0	4253600	±	9.51134e+06	N/A
Q838M6		0	±	0	0	±	0	N/A
Q839D2		0	±	0	121938	±	272662	N/A
Q8BSF5	Kelch-like protein 38	0	±	0	27698	±	61934.6	N/A
Q8R080	G2 and S phase-expressed protein 1	0	±	0	0	±	0	N/A
Q8R4U6	DNA topoisomerase I, mitochondrial	0	±	0	0	±	0	N/A
Q8R5J9	PRA1 family protein 3	0	±	0	118164	±	264223	N/A
Q9JI91;O88990	Alpha-actinin-2;Alpha-actinin-3	0	±	0	349420	±	781327	N/A
Q9QXD1	Peroxisomal acyl-coenzyme A oxidase 2	0	±	0	0	±	0	N/A
Q9R0H0	Peroxisomal acyl-coenzyme A oxidase 1	0	±	0	161464	±	361044	N/A
