# Supplementary figures and images for: Inhibiting host-protein deposition on urinary catheters reduces associated urinary tract infections (part 1 of 2)
Source: eLife journal article supplement (doi:10.7554/elife.75798), 2022-03-26

Value-ordered fold change

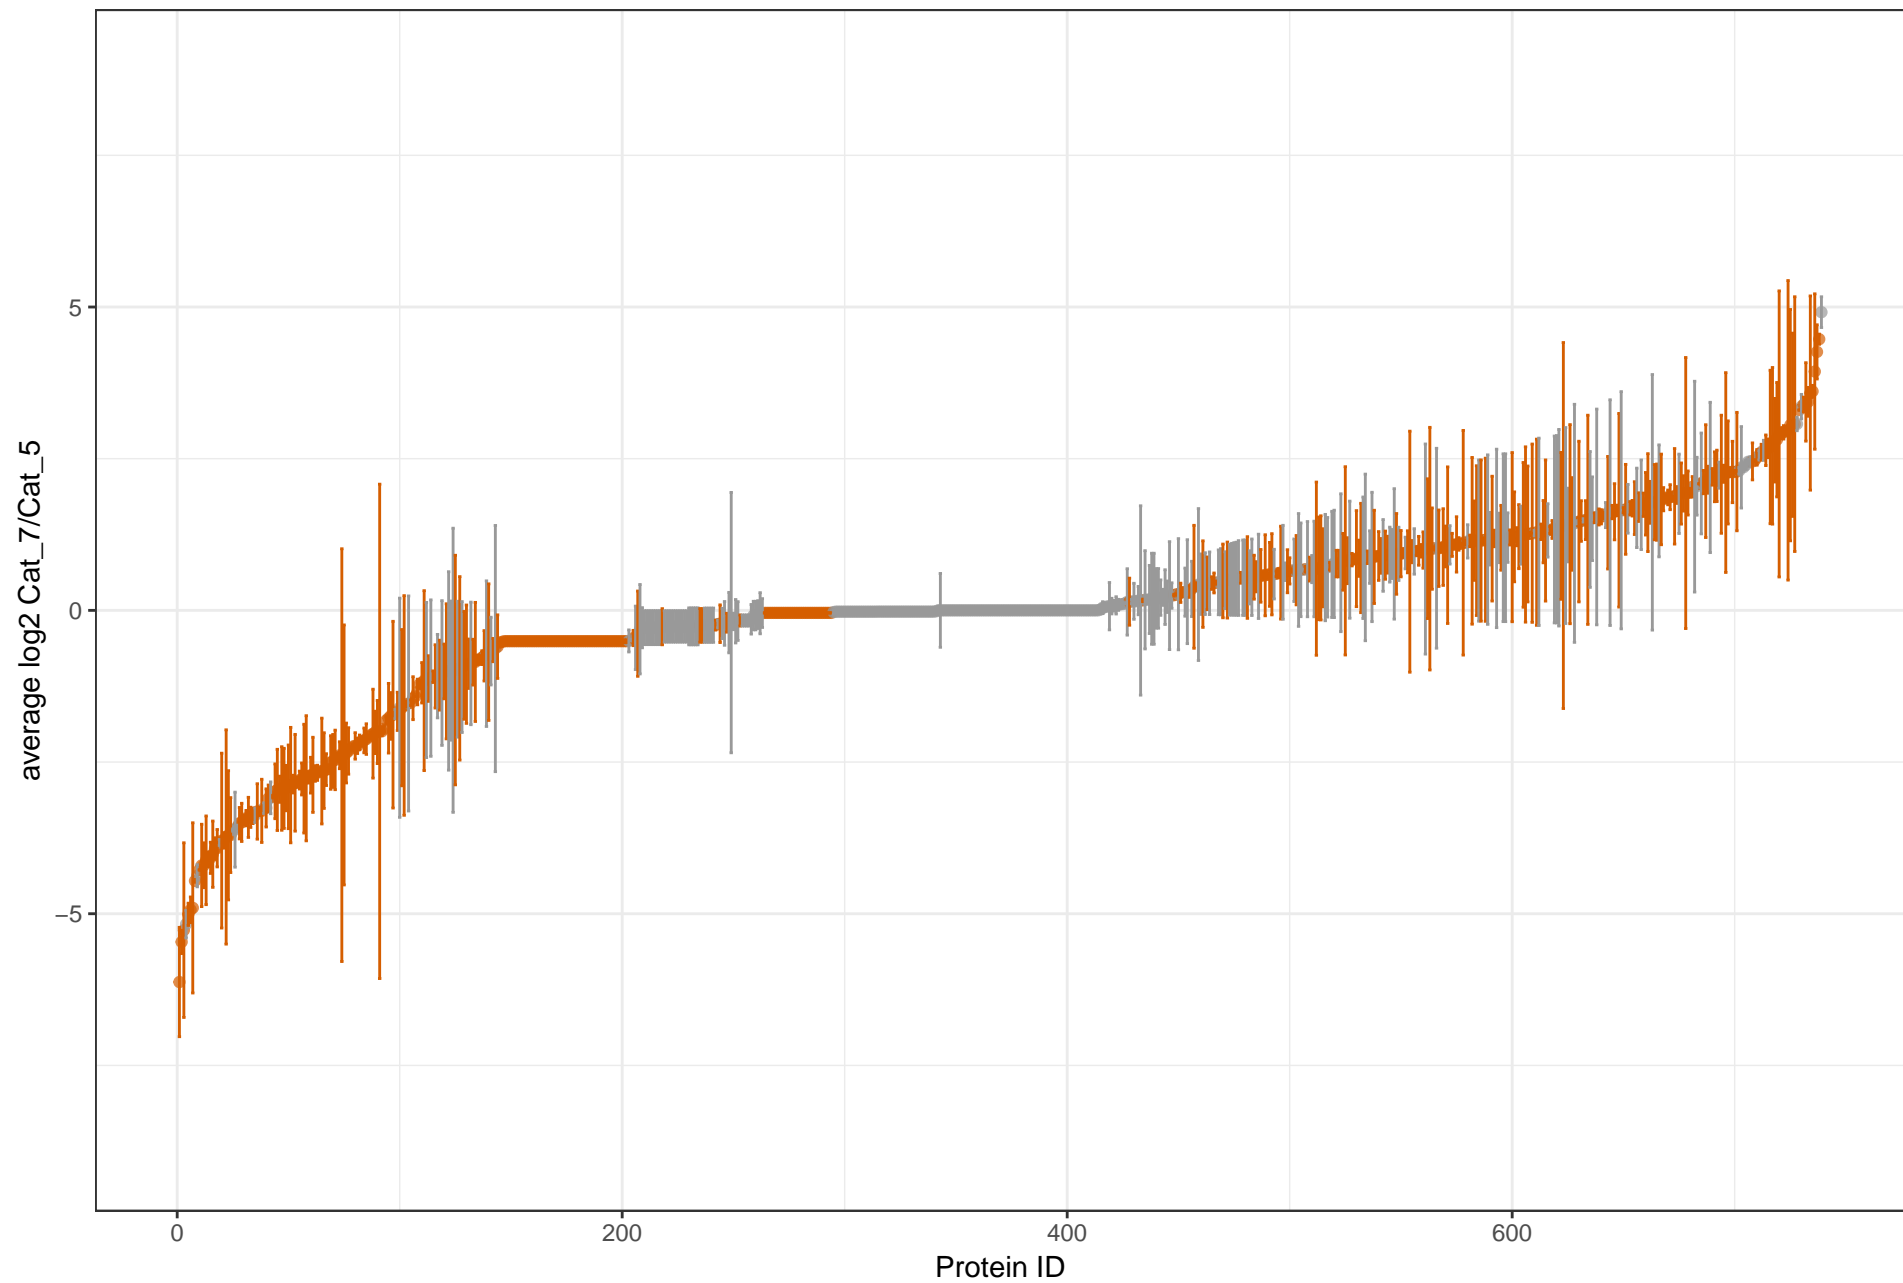

Supplement: supp [file elife-75798-supp-v1.zip]

MA plot

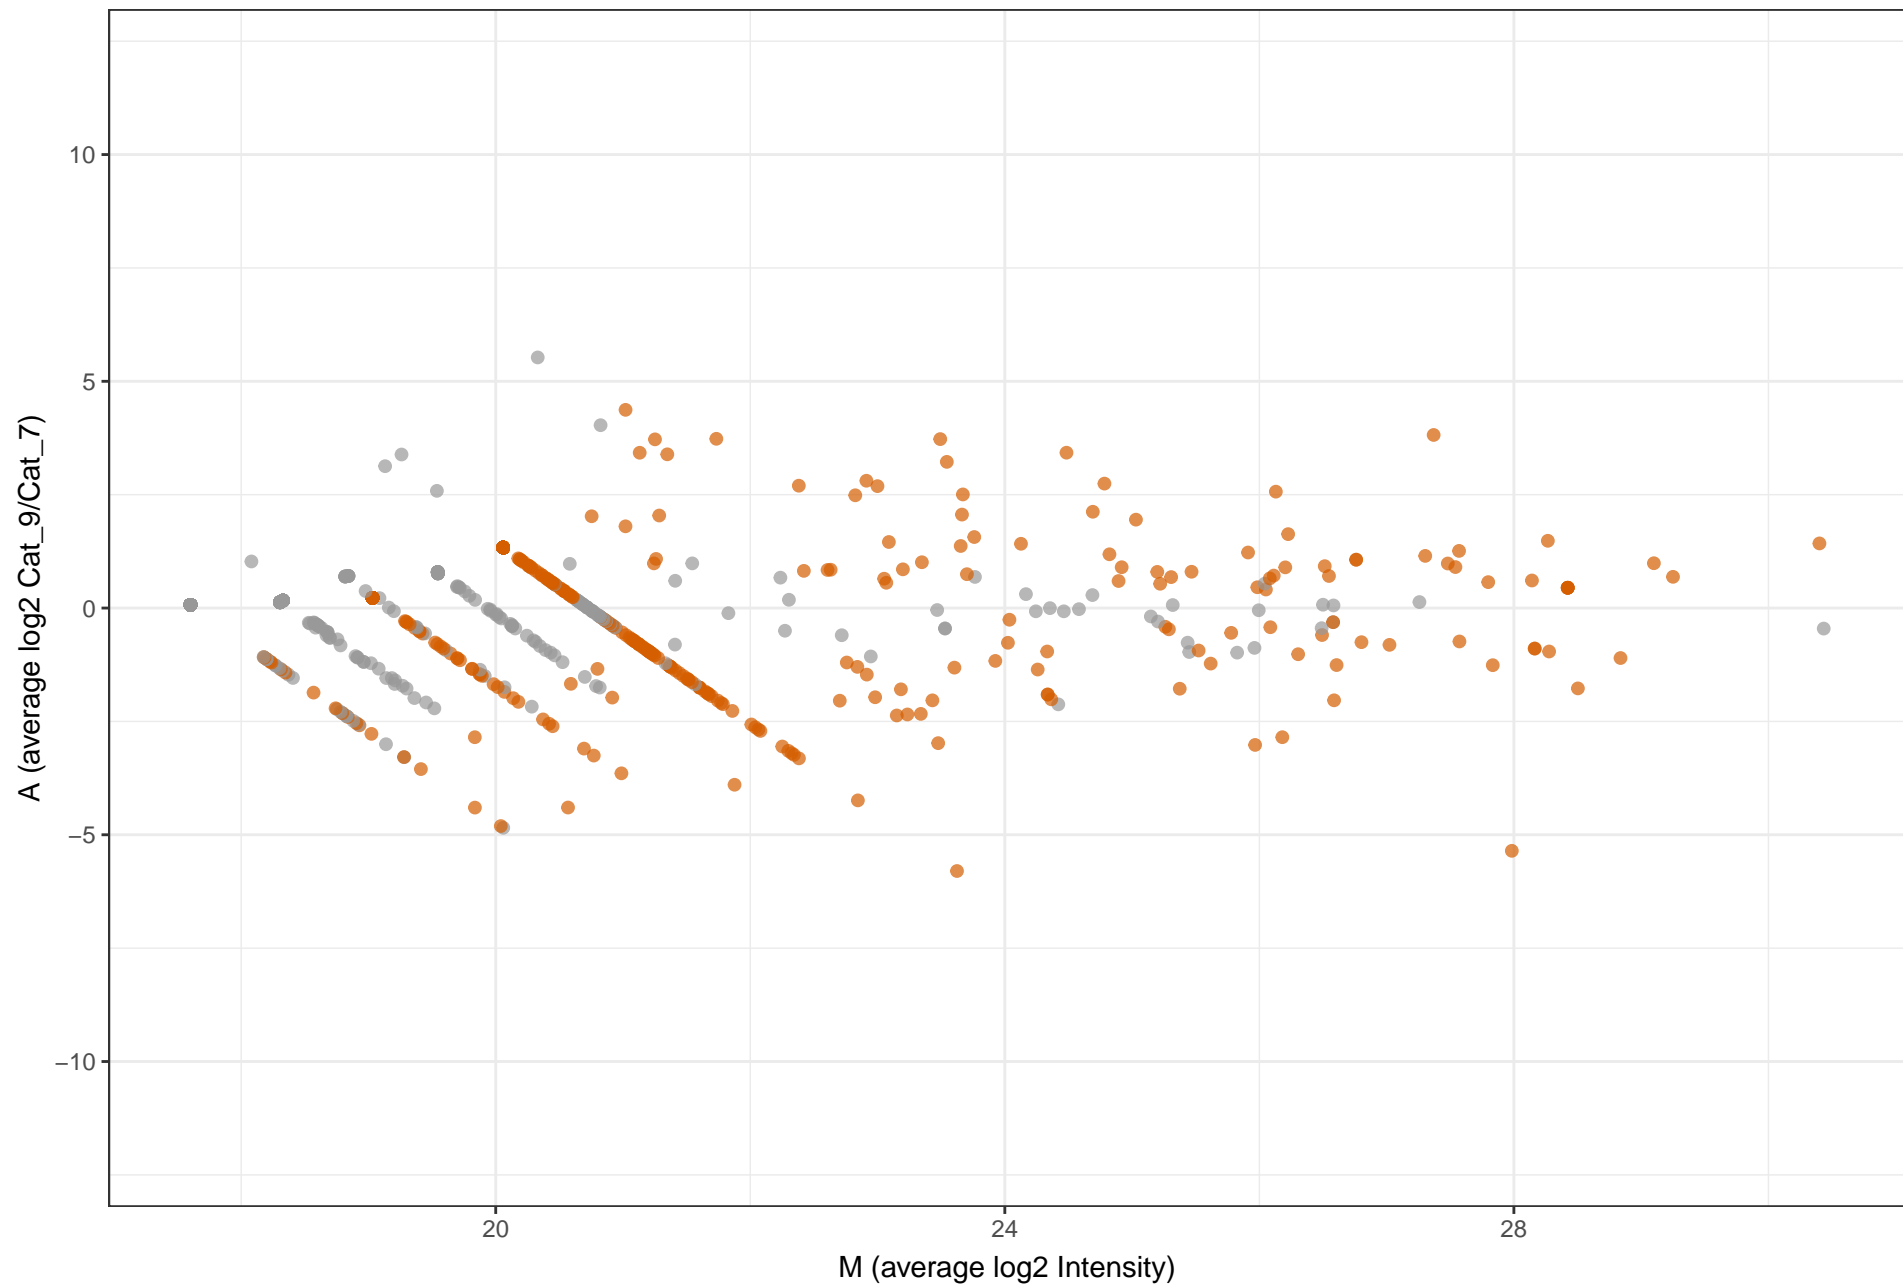

Supplement: supp [file elife-75798-supp-v1.zip]

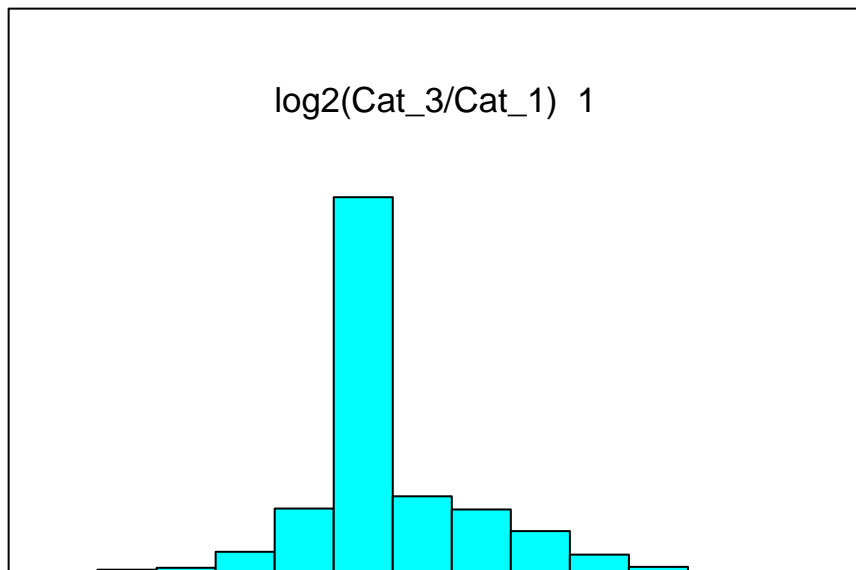

-6 -4 -2 0 2 4 6

6  
4  
2  
0  
-2  
-4  
-6

0.69

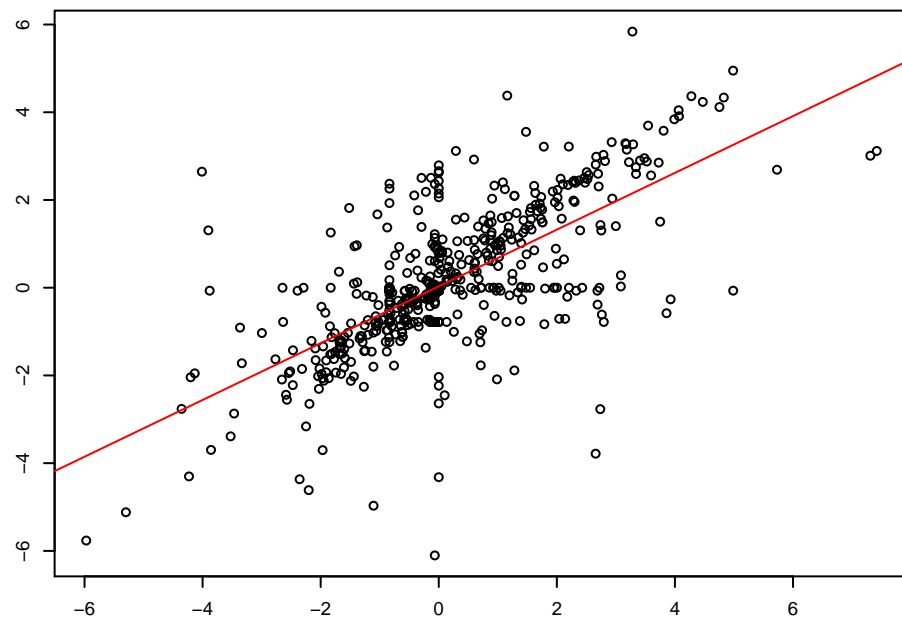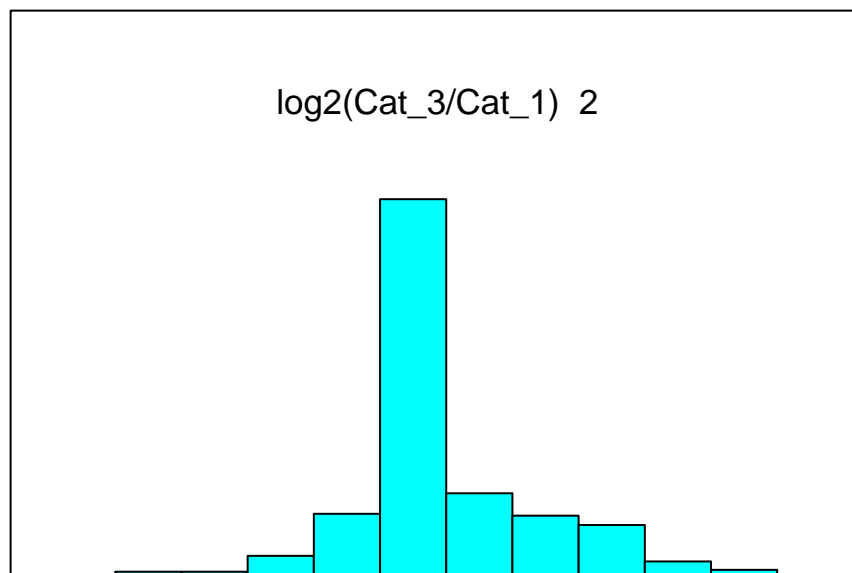

Supplement: supp [file elife-75798-supp-v1.zip]

Value-ordered fold change

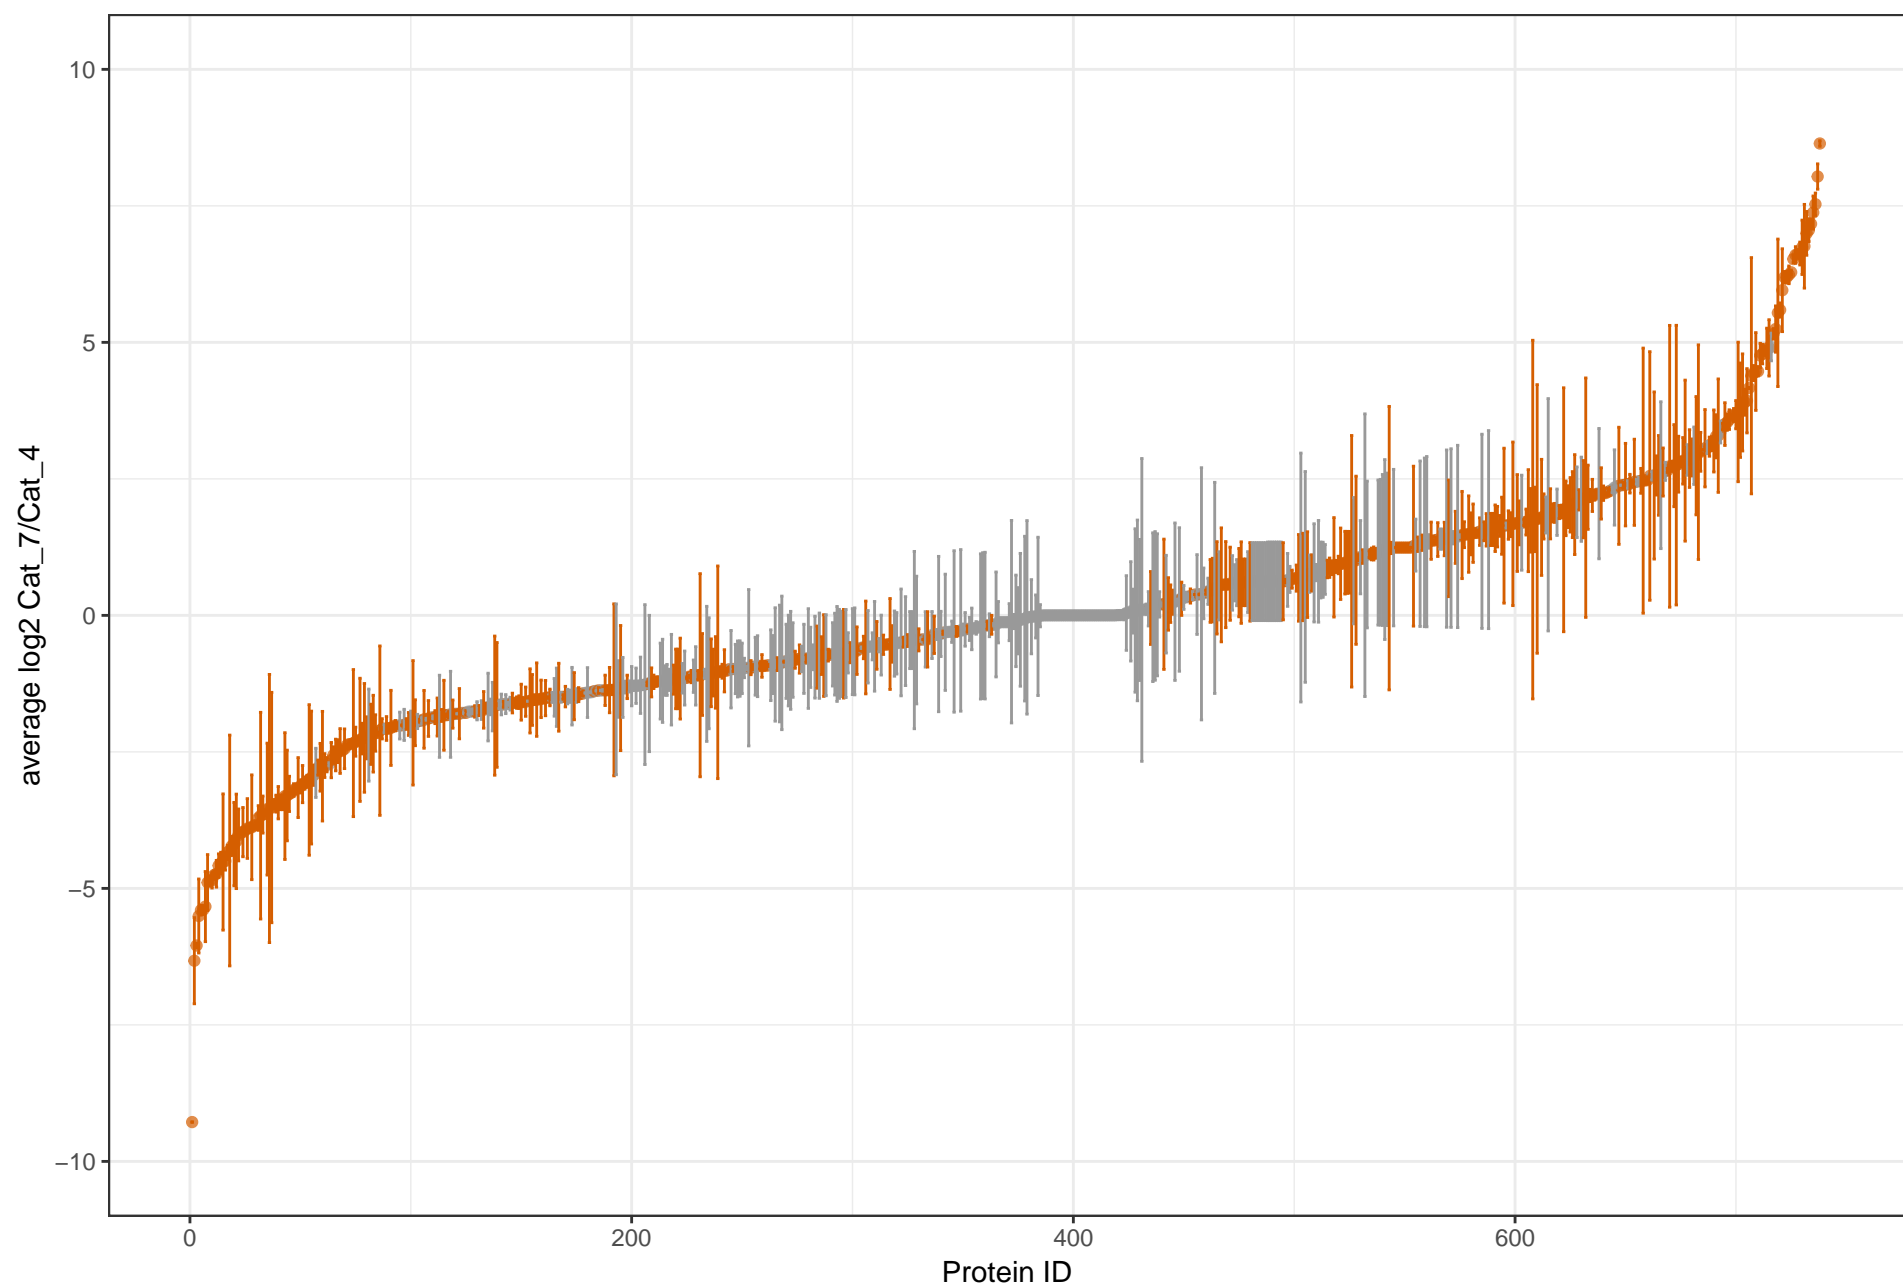

Supplement: supp [file elife-75798-supp-v1.zip]

**P-value vs Fold change**

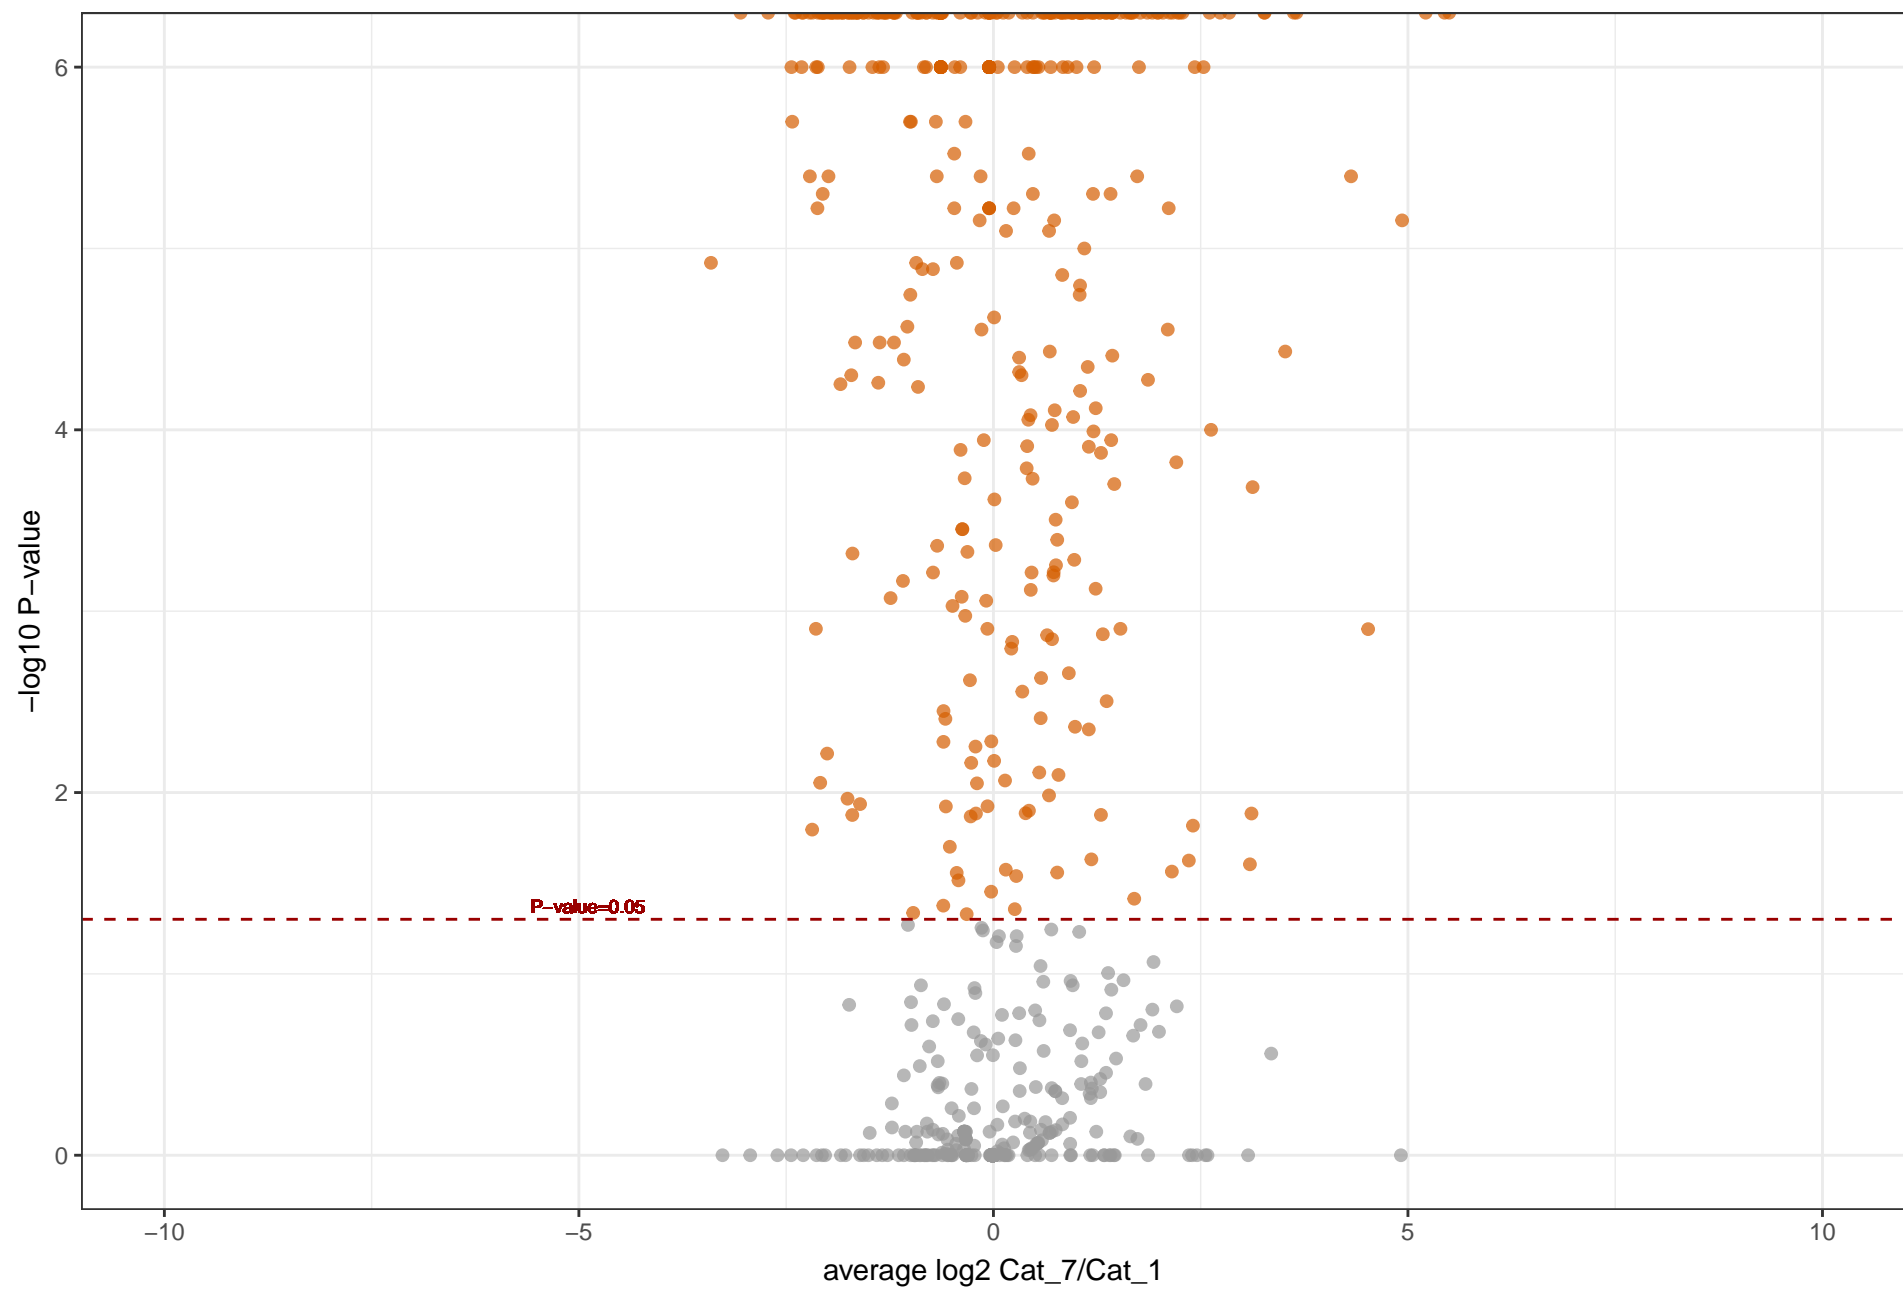

Supplement: supp [file elife-75798-supp-v1.zip]

MA plot

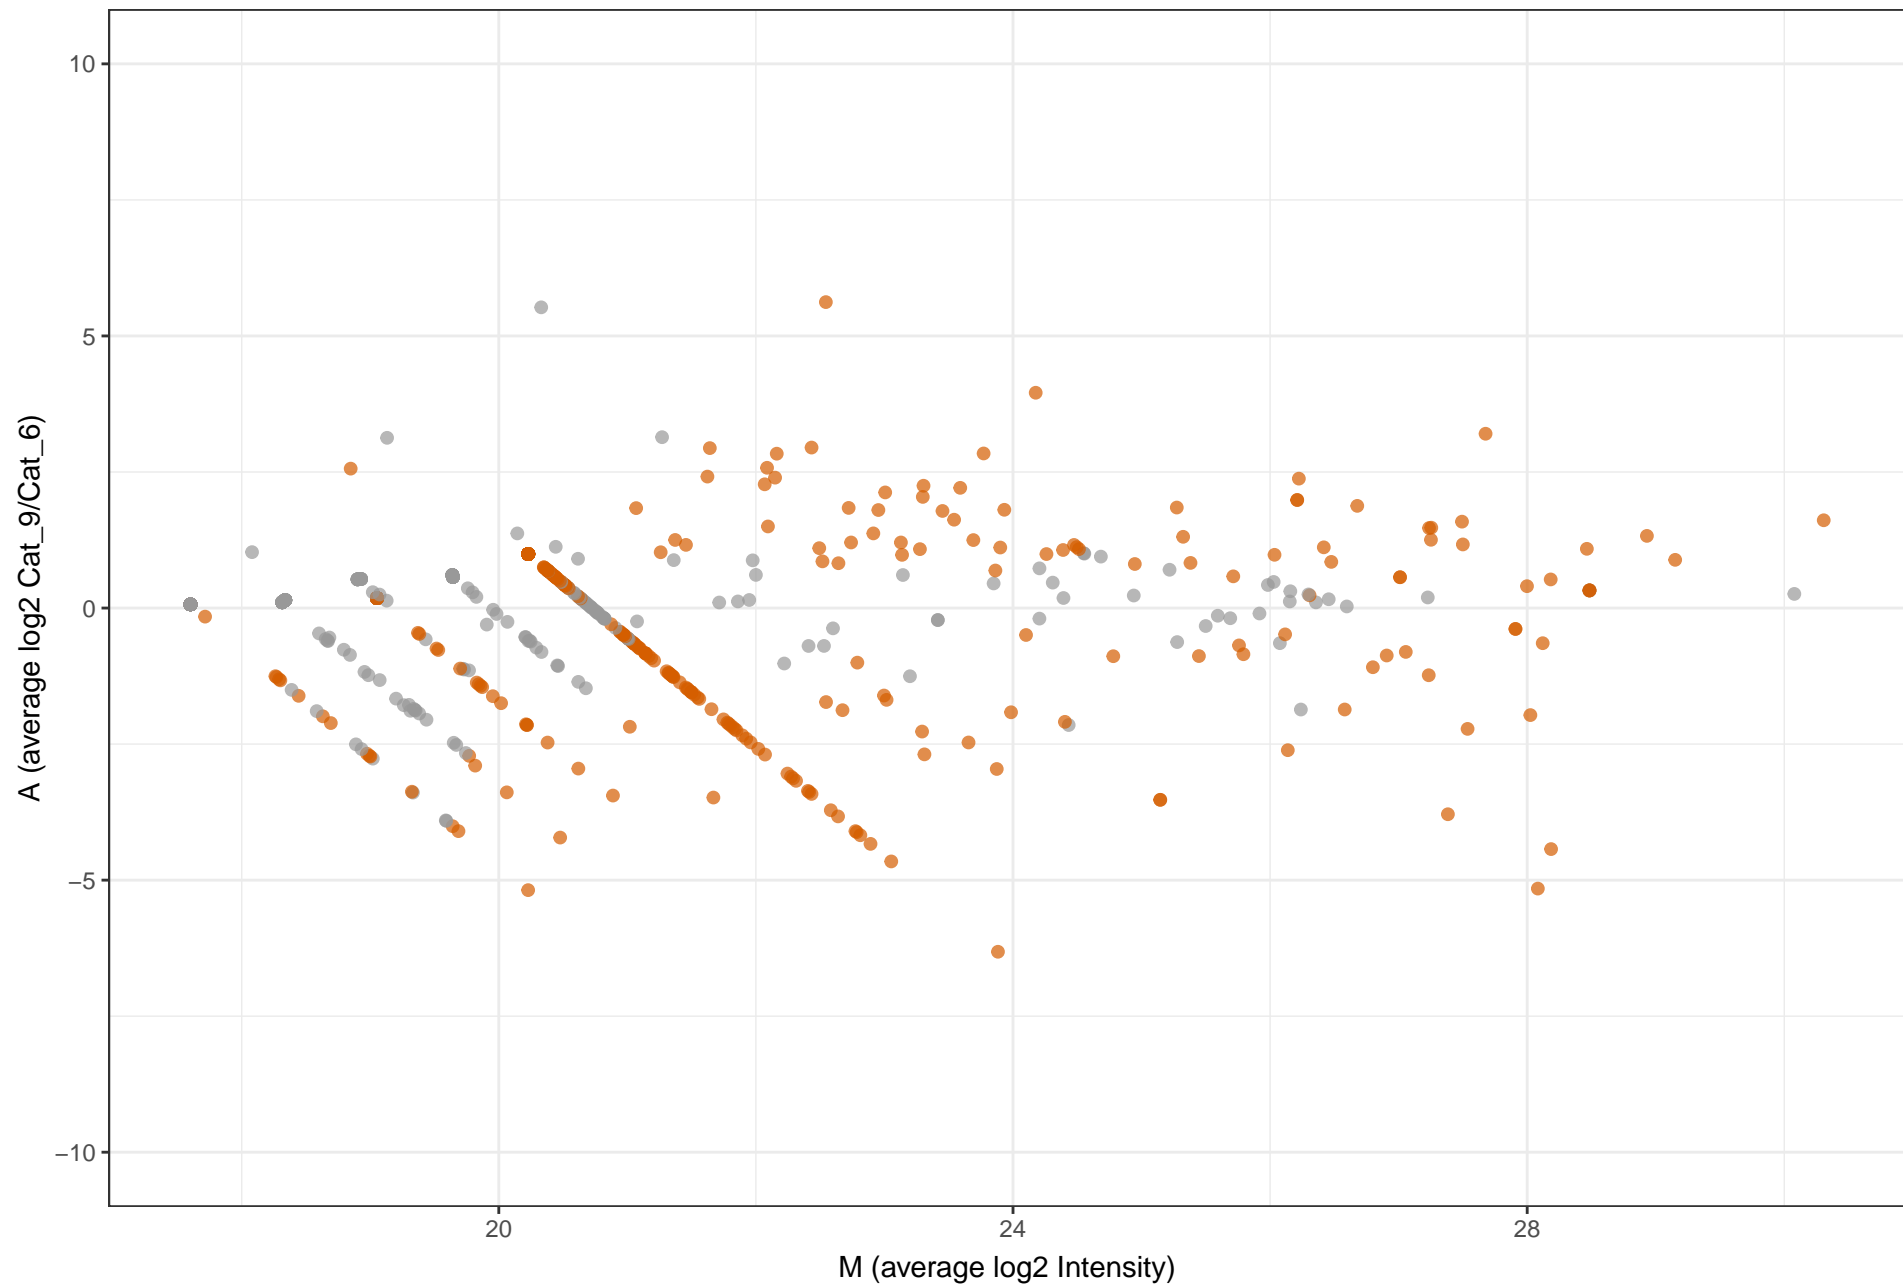

Supplement: supp [file elife-75798-supp-v1.zip]

Value-ordered fold change

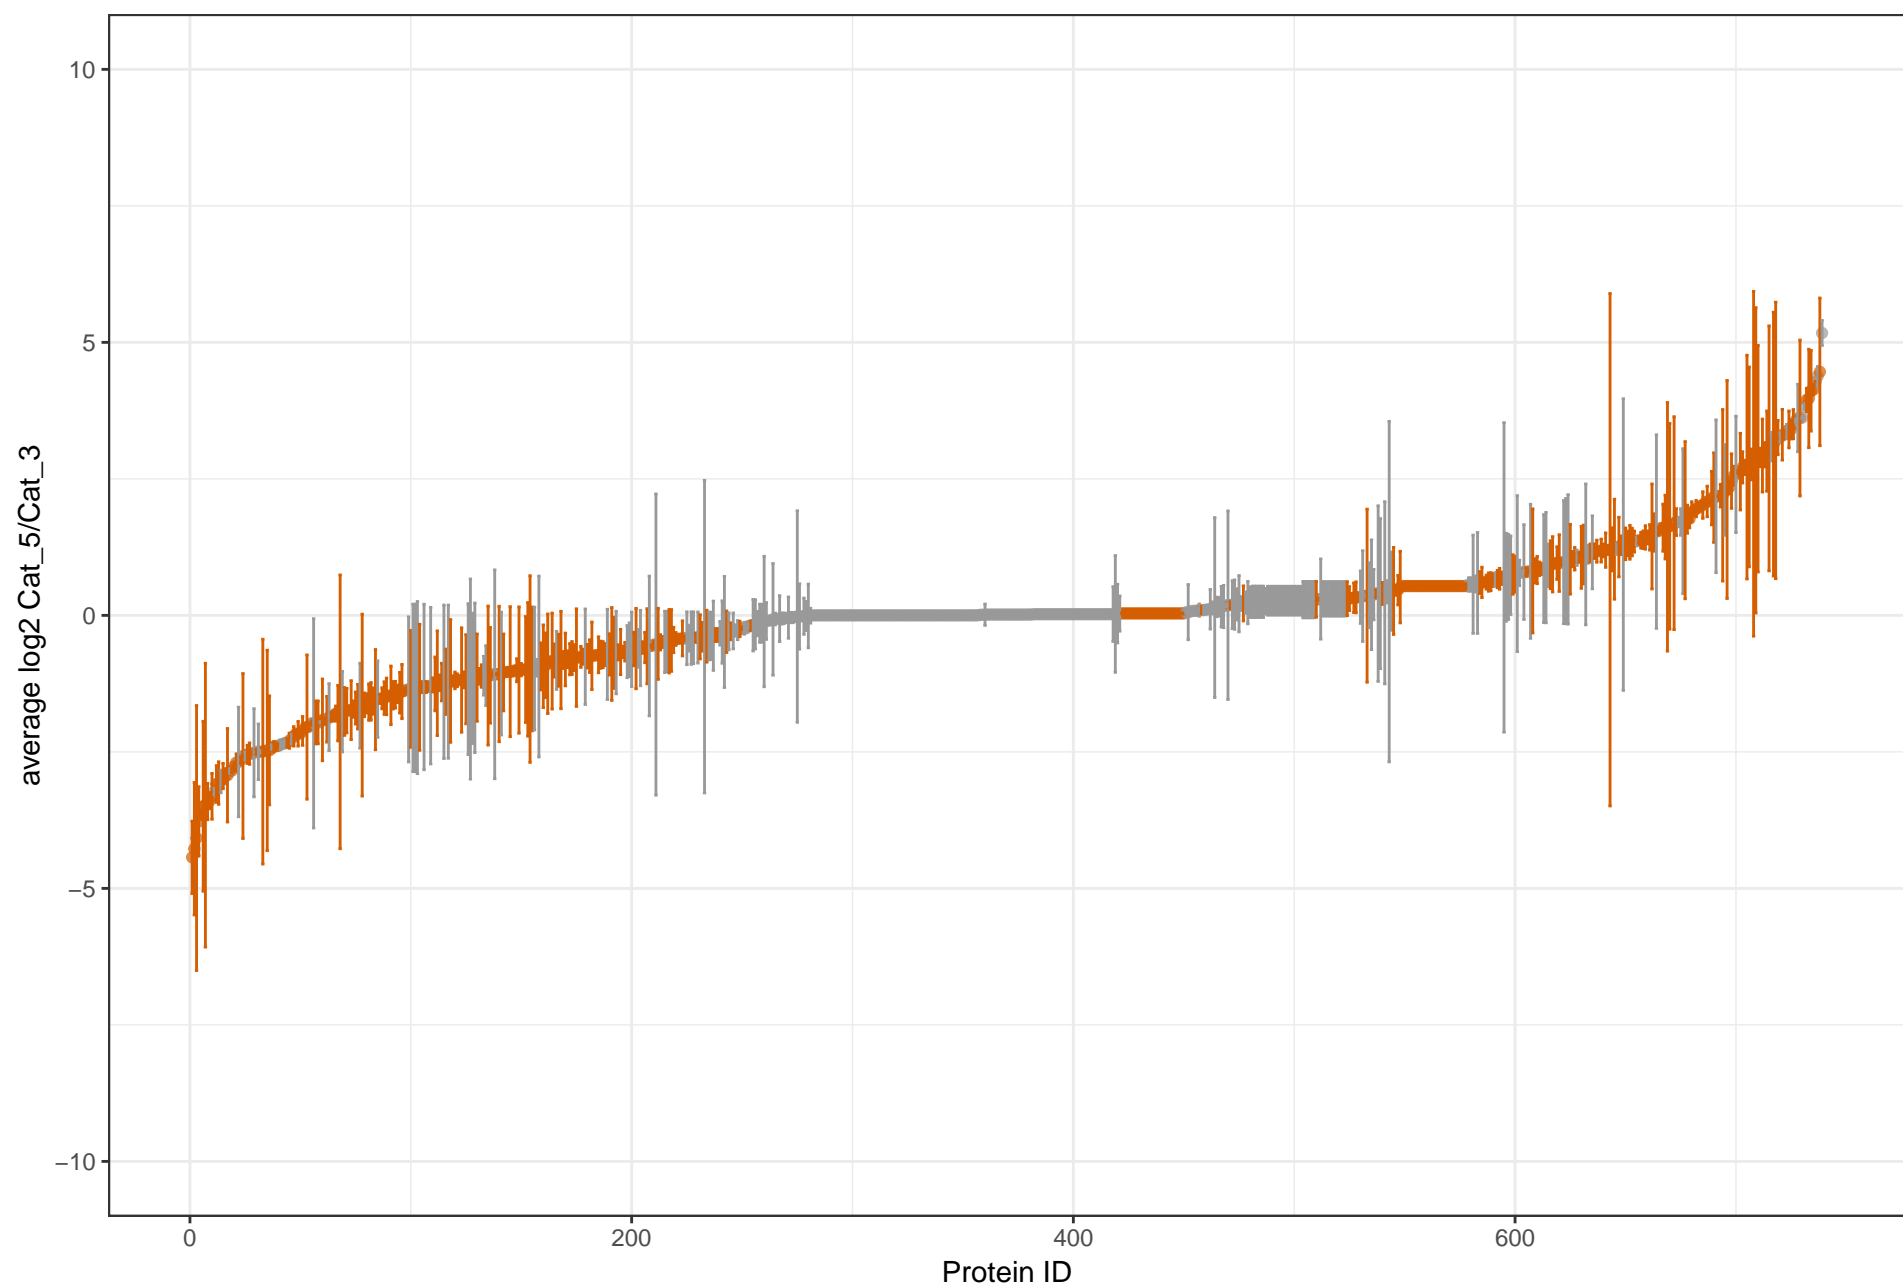

Supplement: supp [file elife-75798-supp-v1.zip]

P-value vs Fold change

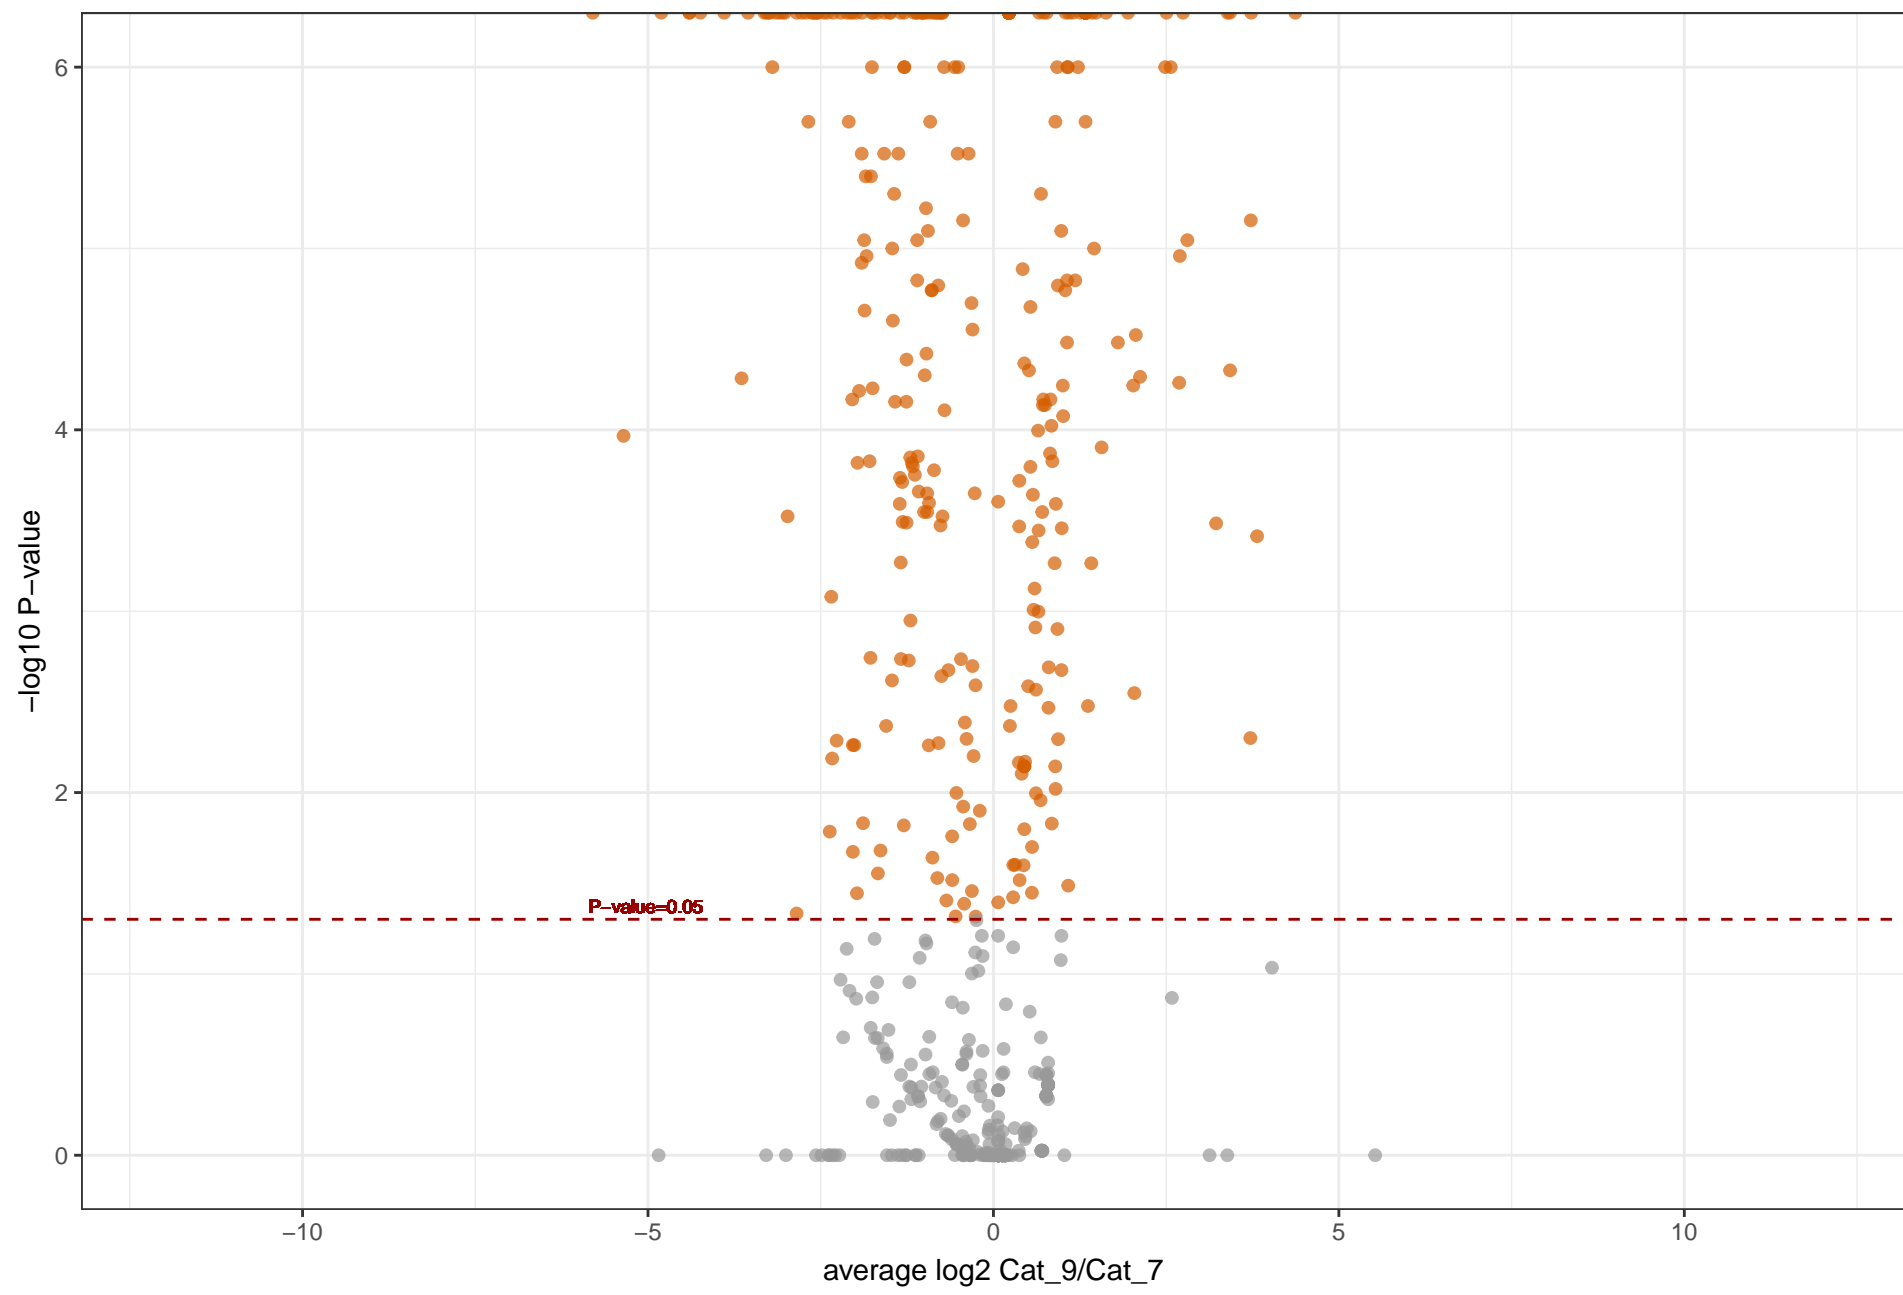

Supplement: supp [file elife-75798-supp-v1.zip]

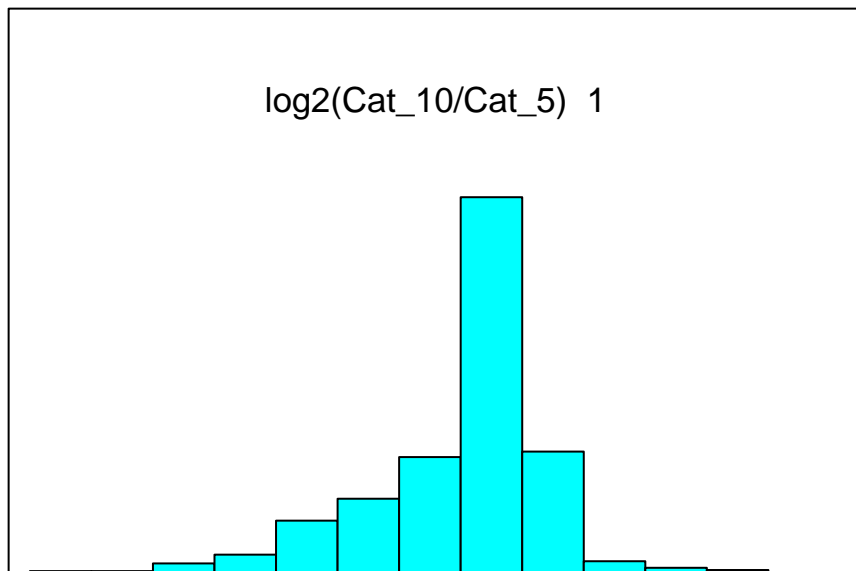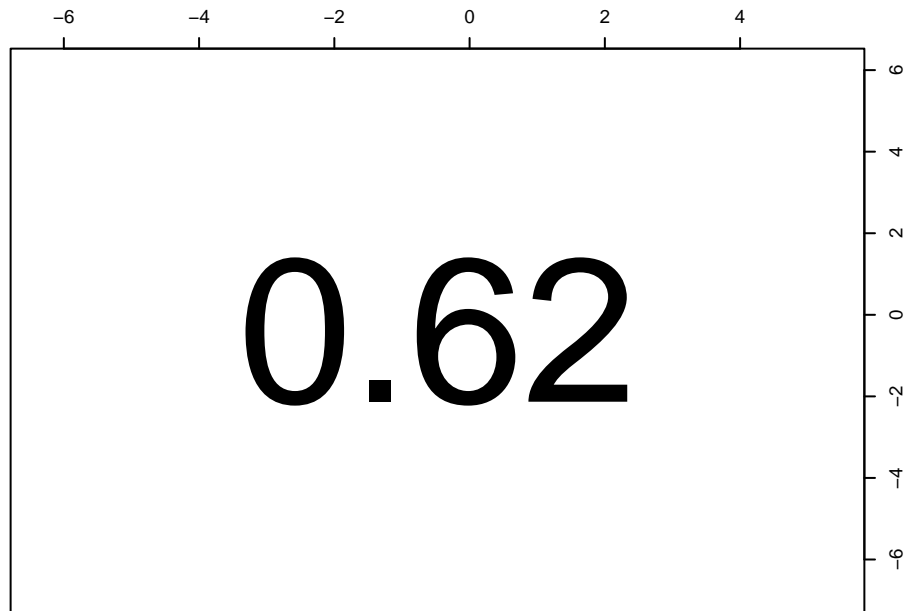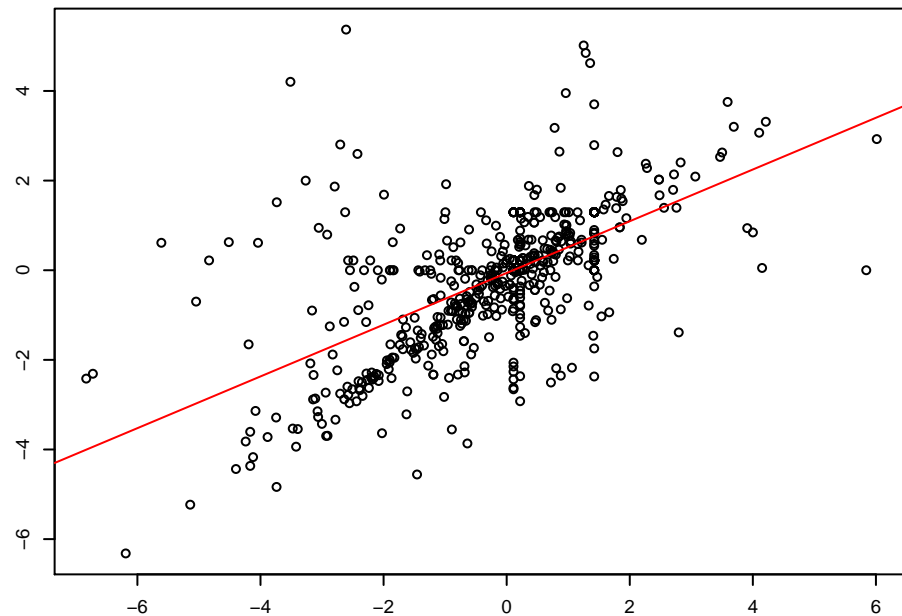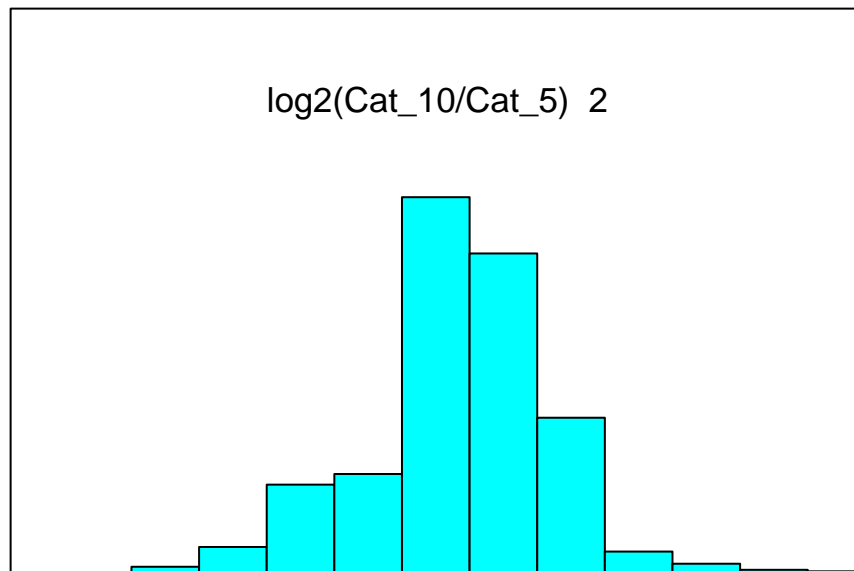

Supplement: supp [file elife-75798-supp-v1.zip]

Value-ordered fold change

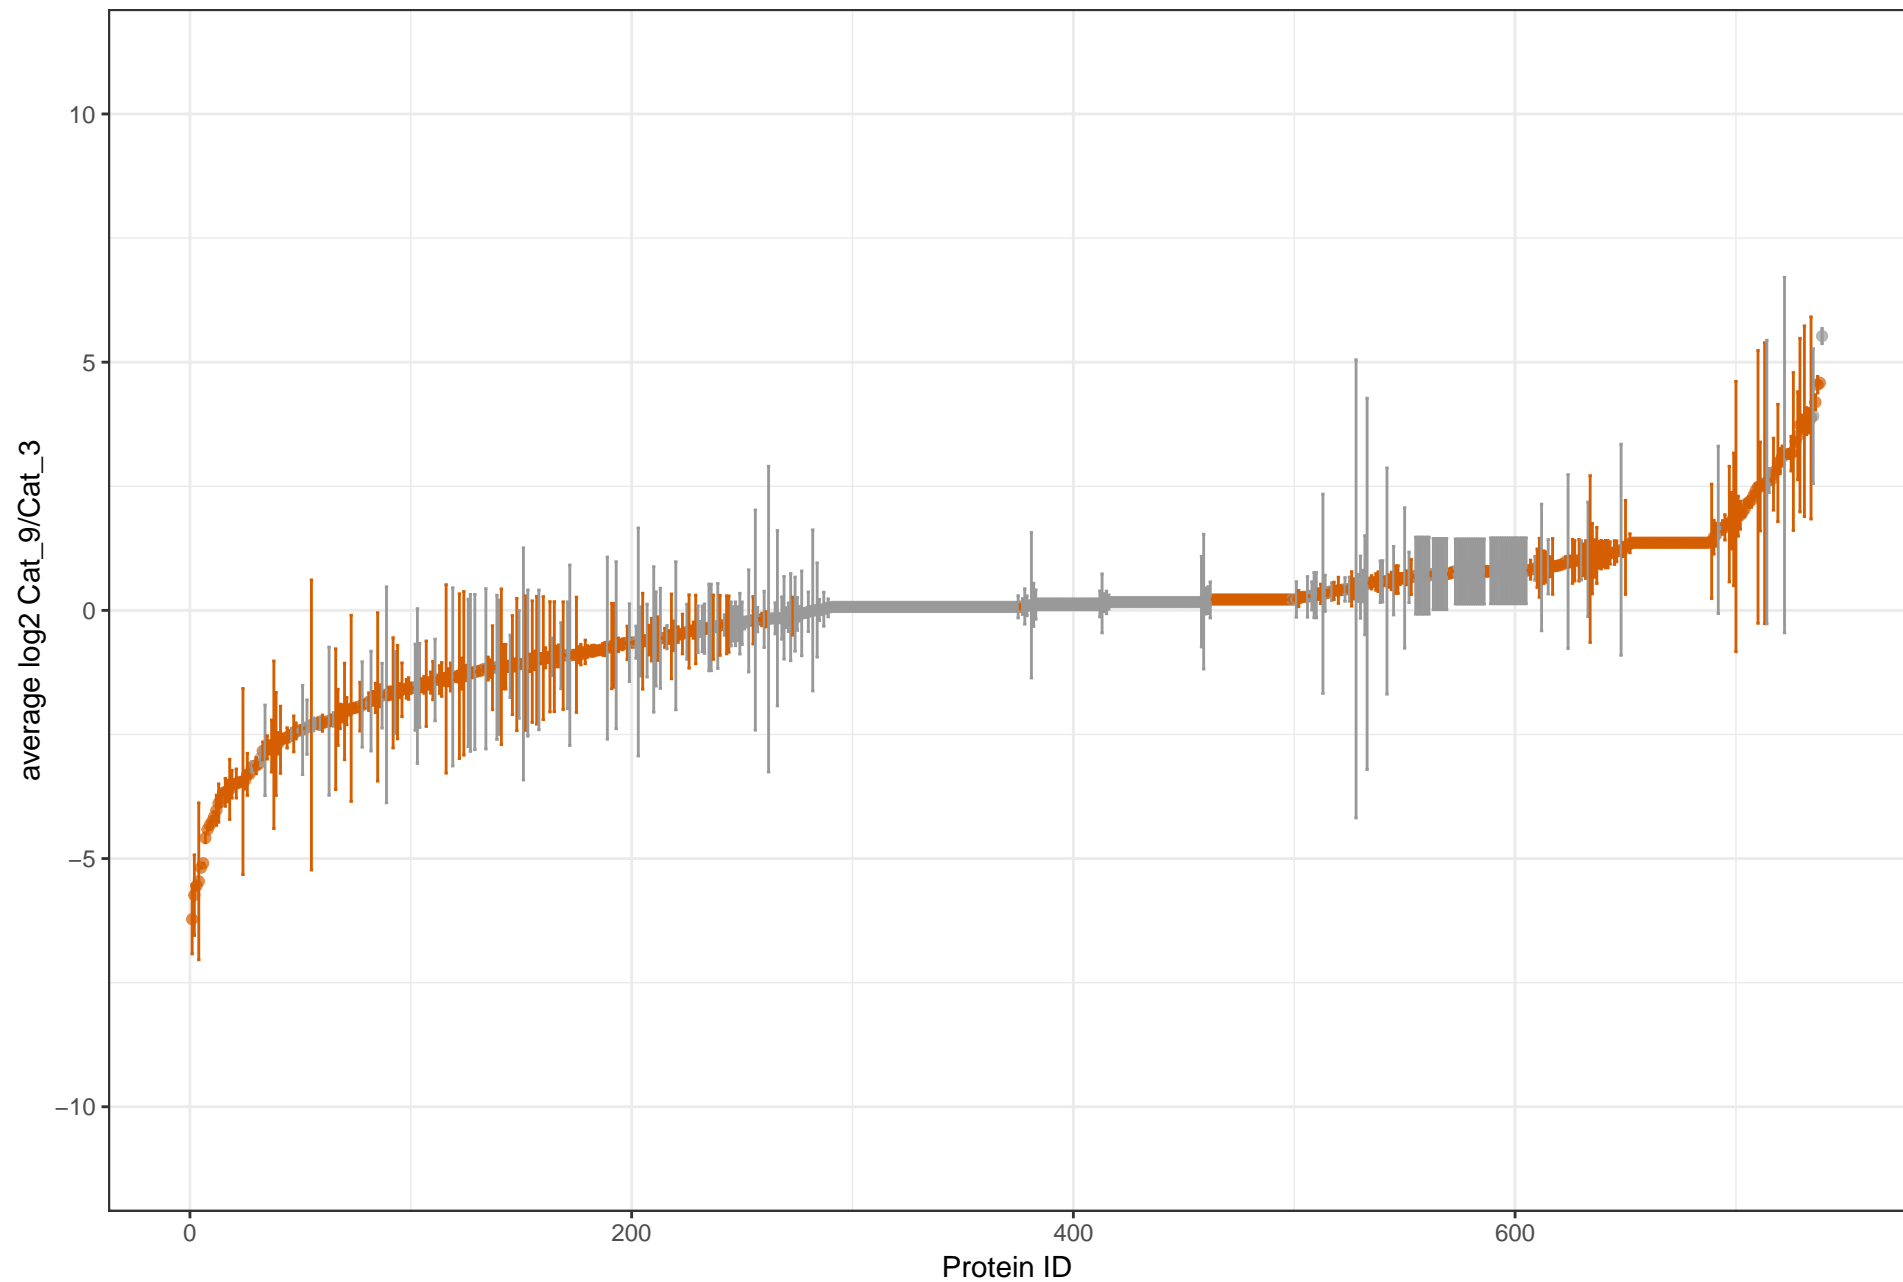

Supplement: supp [file elife-75798-supp-v1.zip]

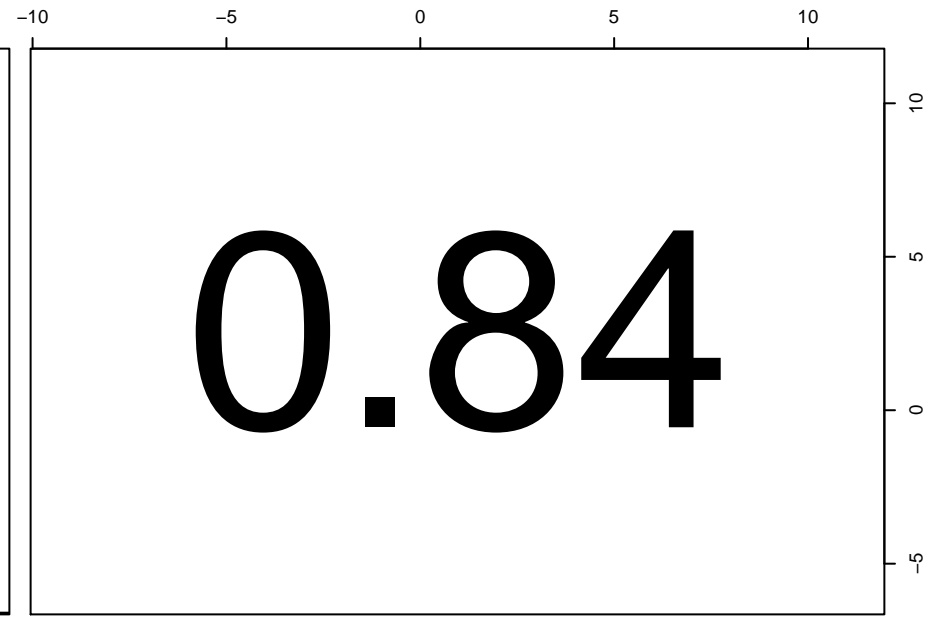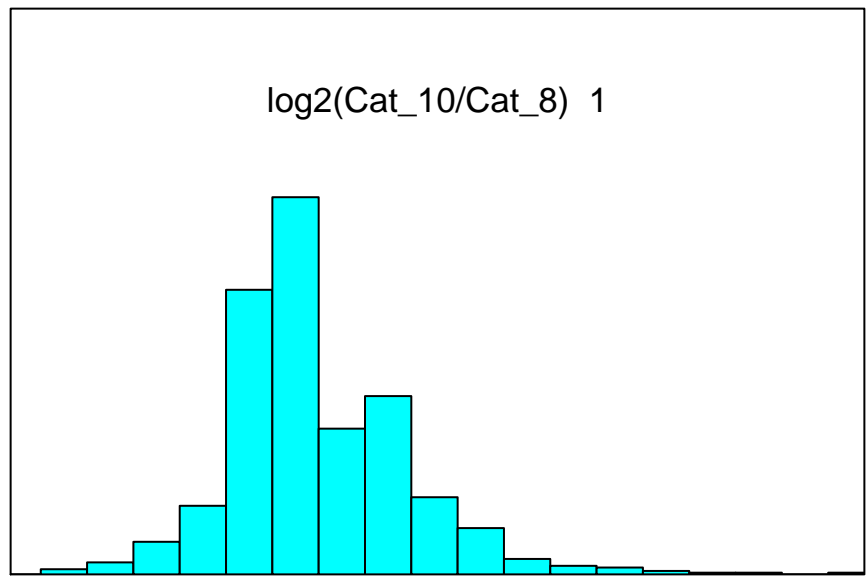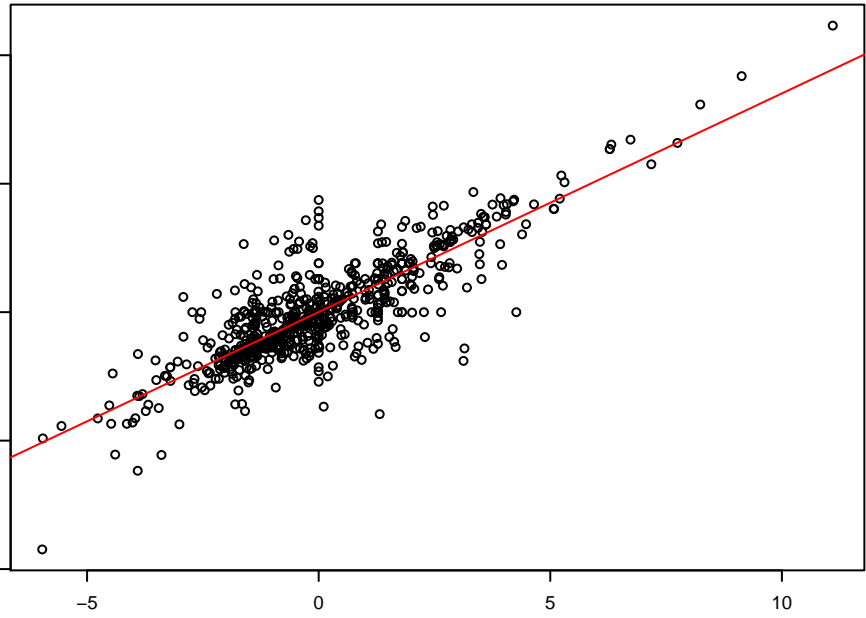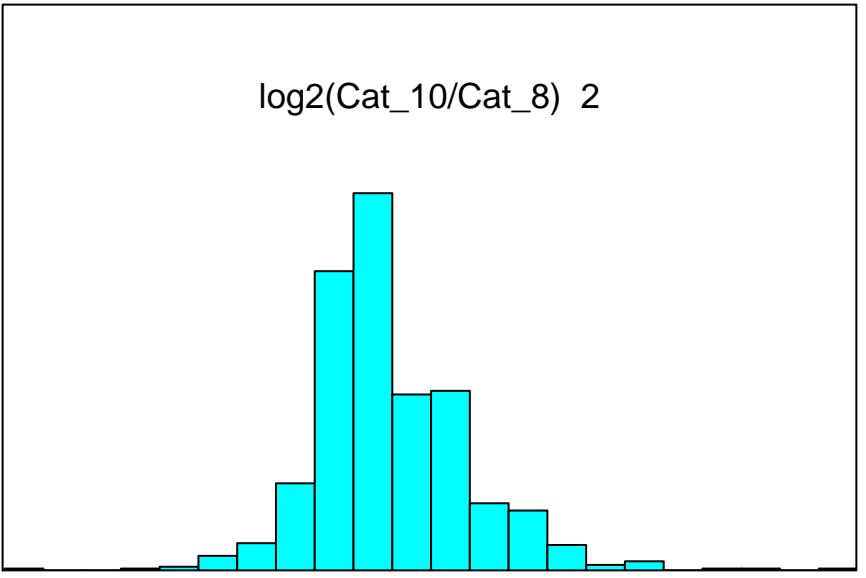

Supplement: supp [file elife-75798-supp-v1.zip]

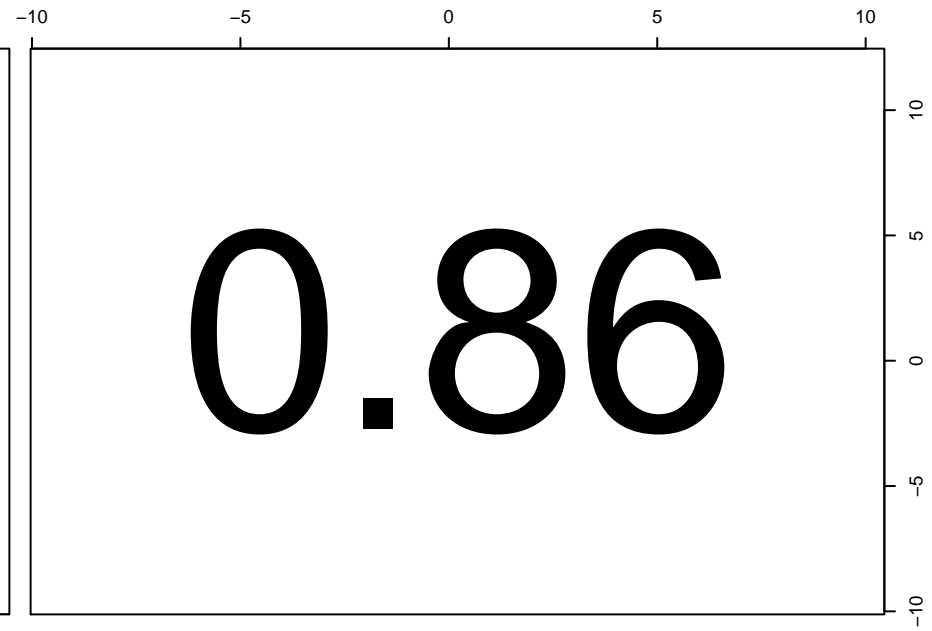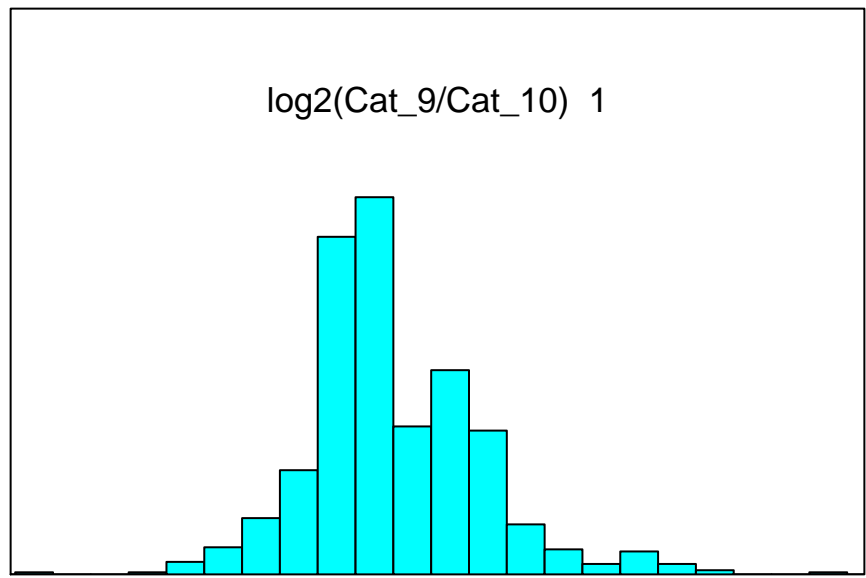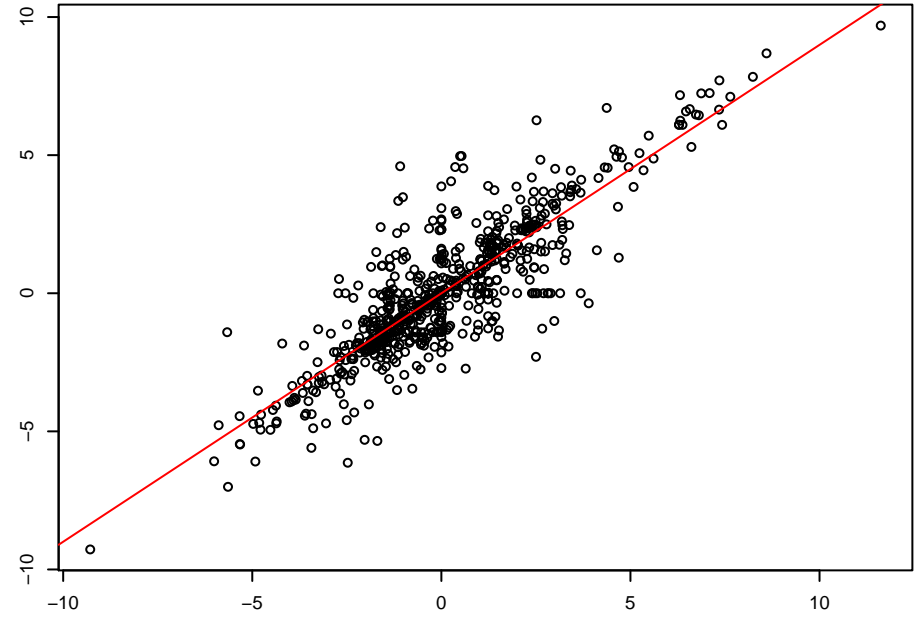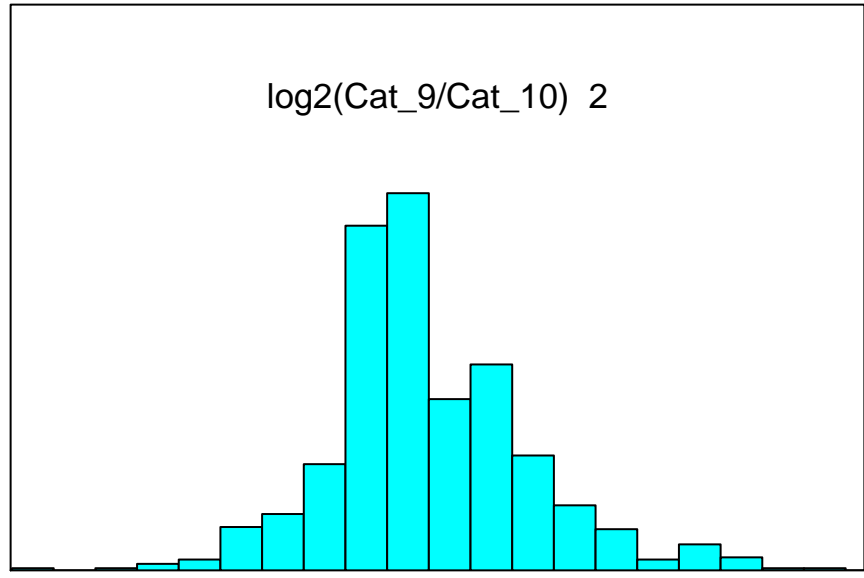

Supplement: supp [file elife-75798-supp-v1.zip]

Value-ordered fold change

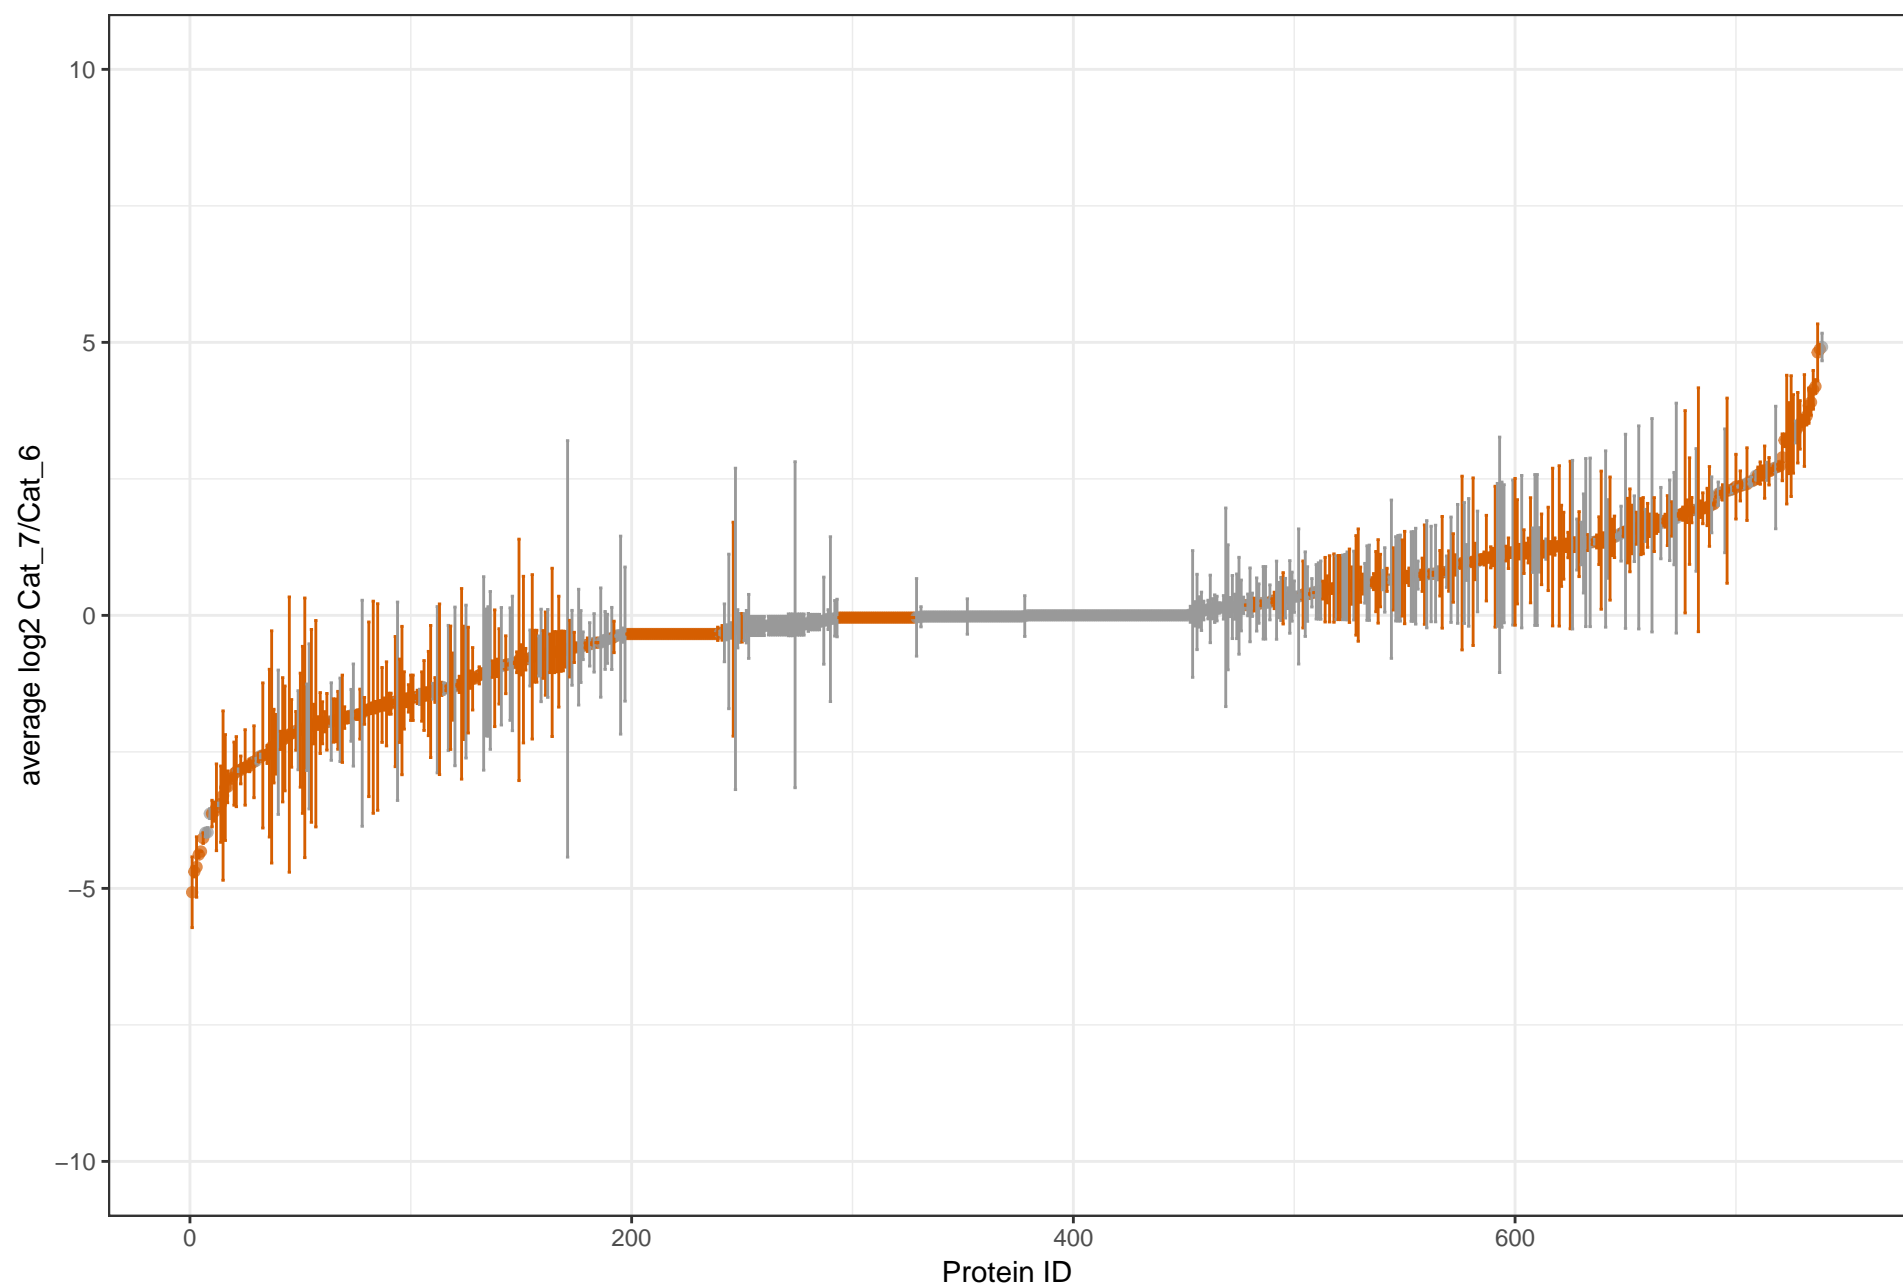

Supplement: supp [file elife-75798-supp-v1.zip]

MA plot

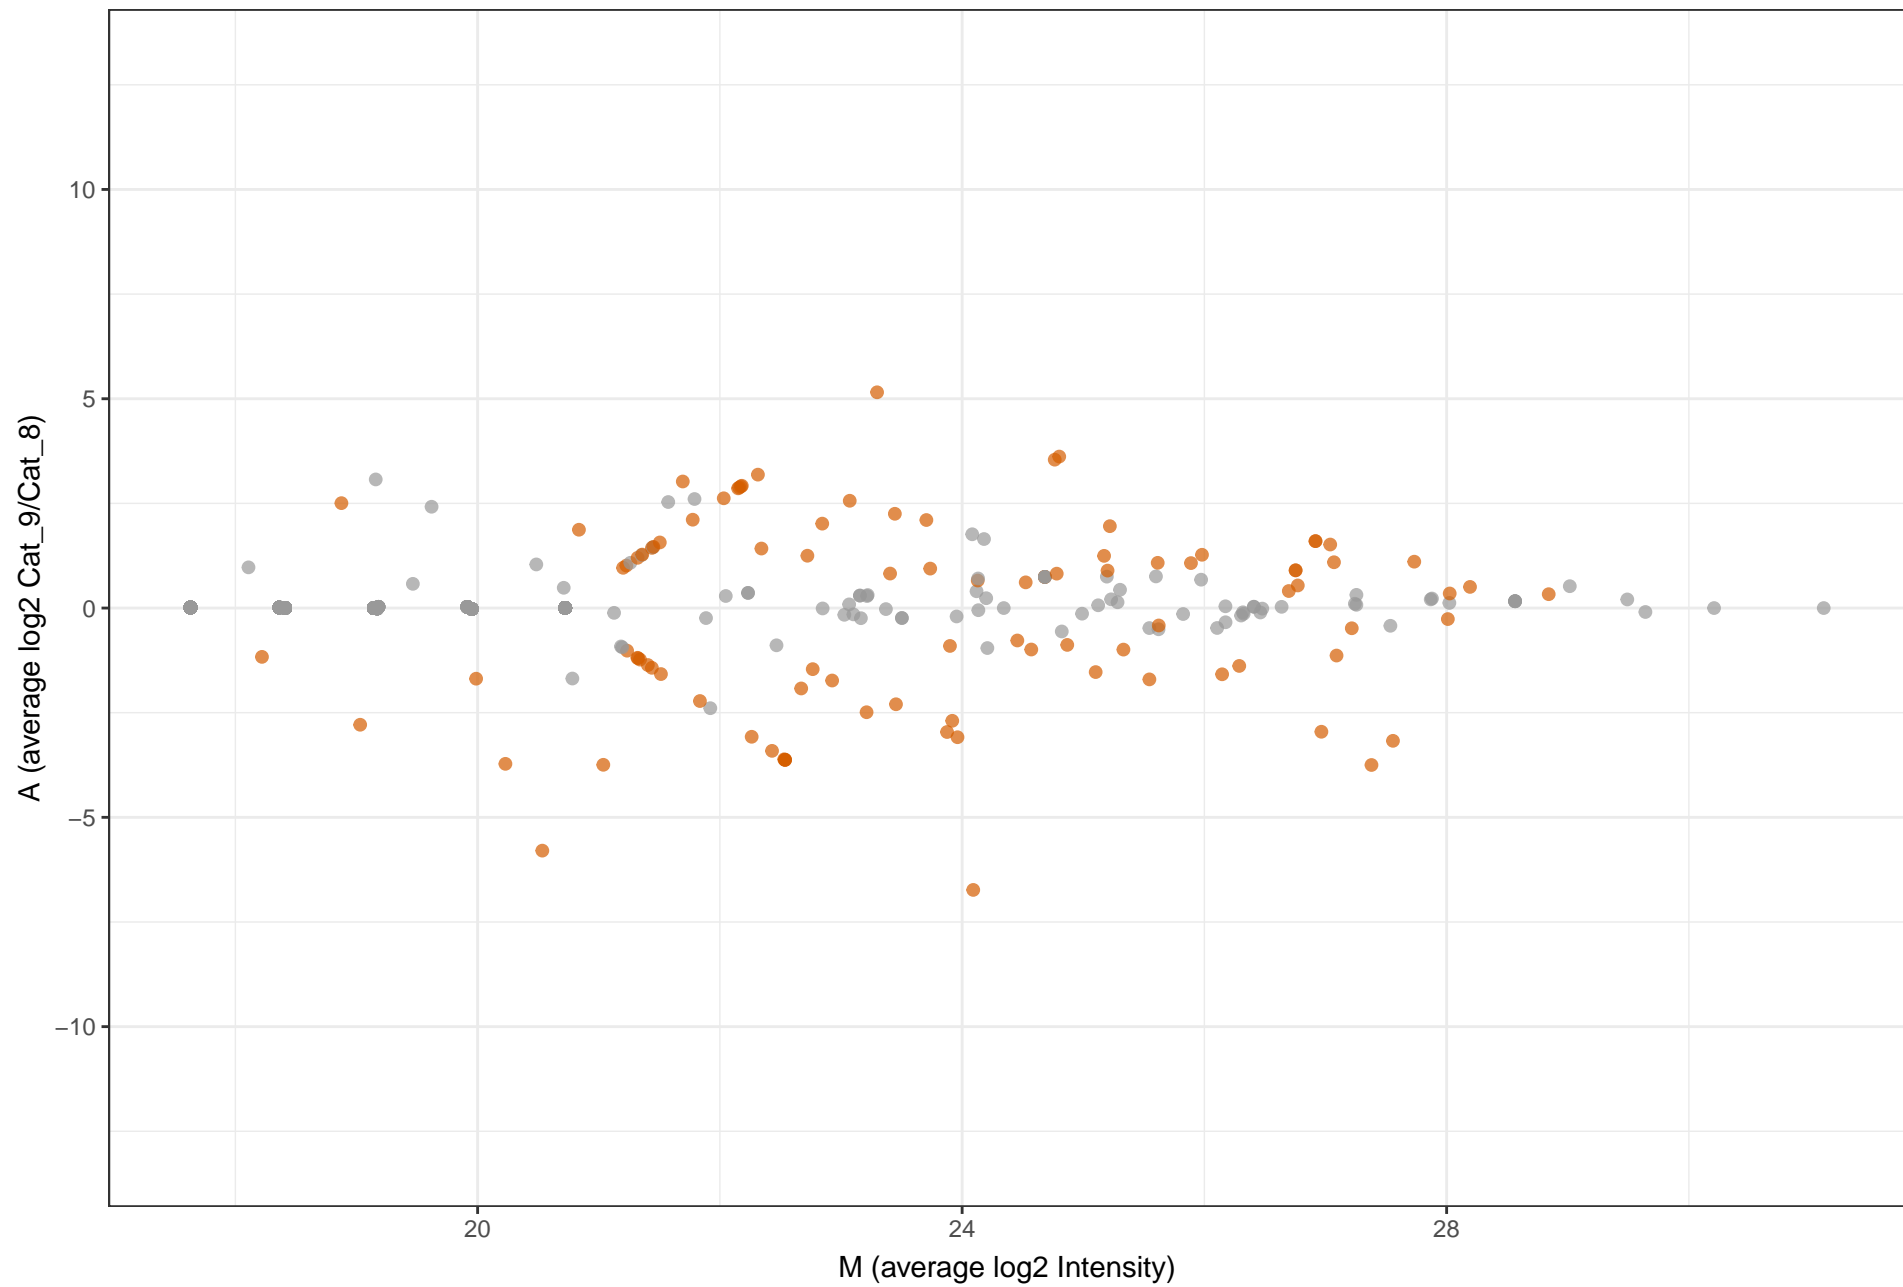

Supplement: supp [file elife-75798-supp-v1.zip]

**P-value vs Fold change**

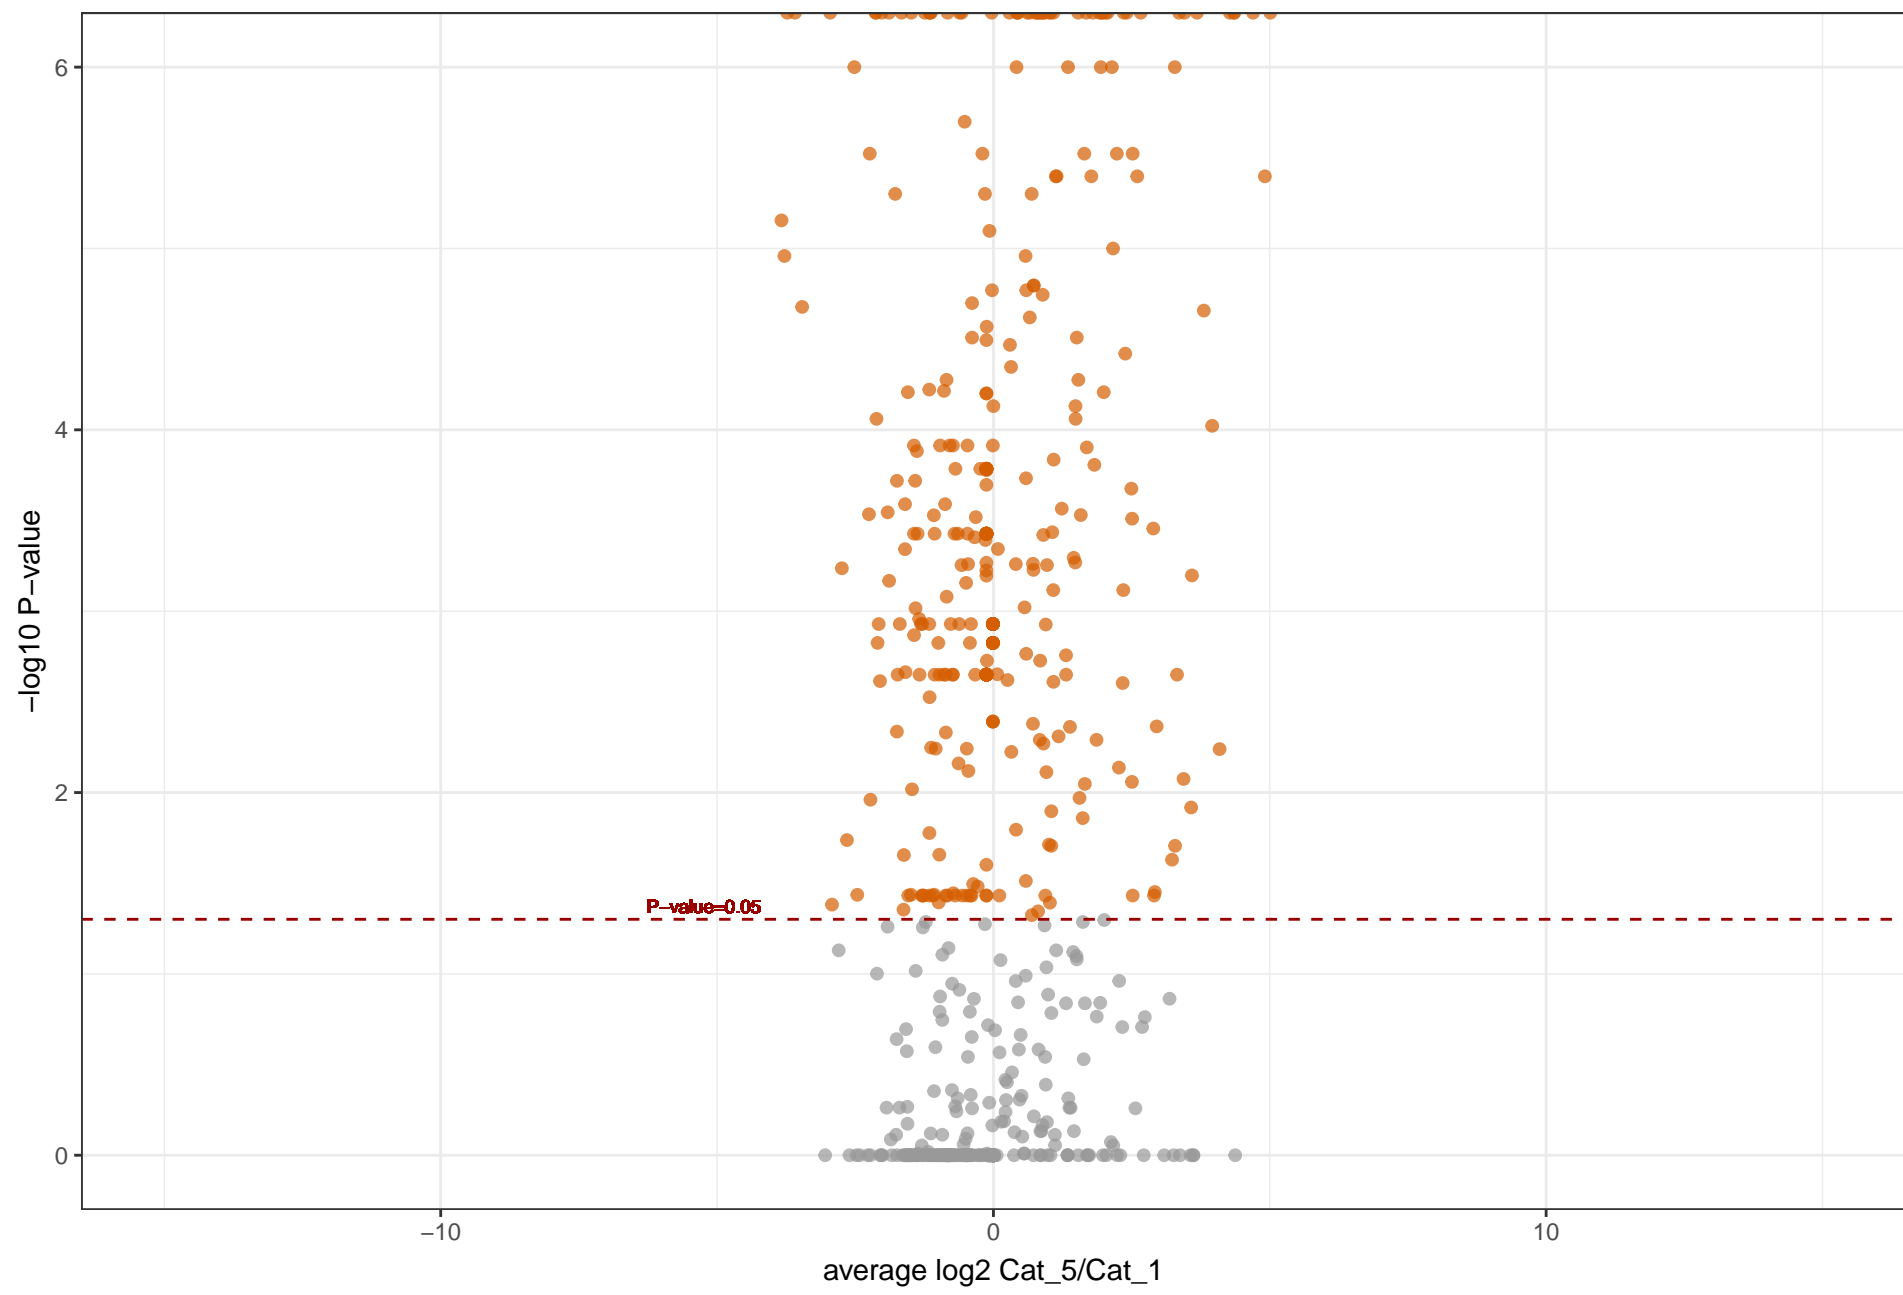

Supplement: supp [file elife-75798-supp-v1.zip]

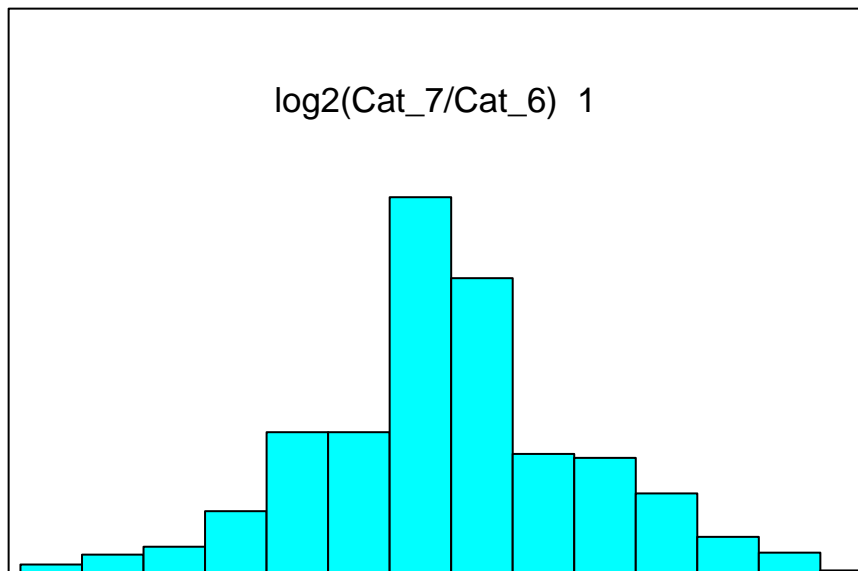

-6 -4 -2 0 2 4 6

6  
4  
2  
0  
-2  
-4  
-6

0.82

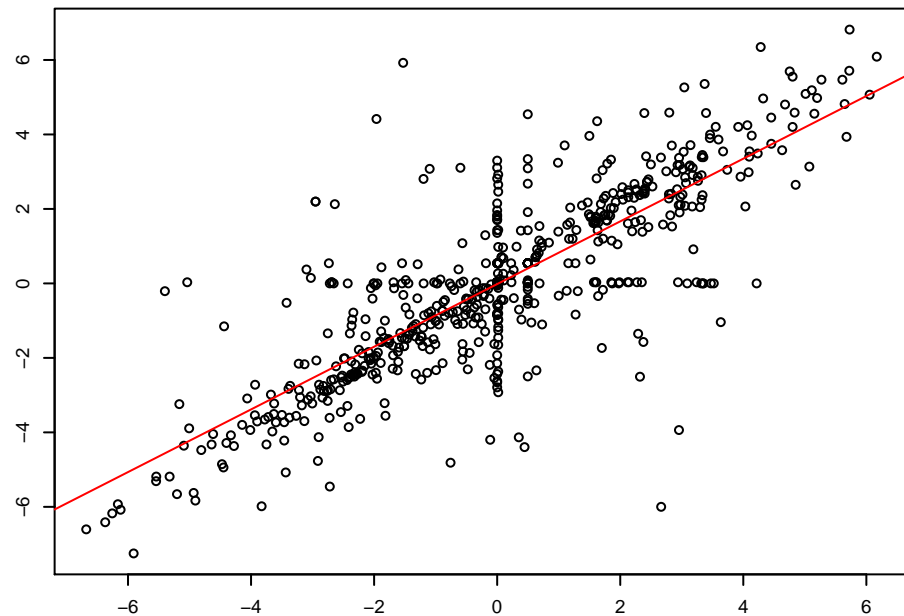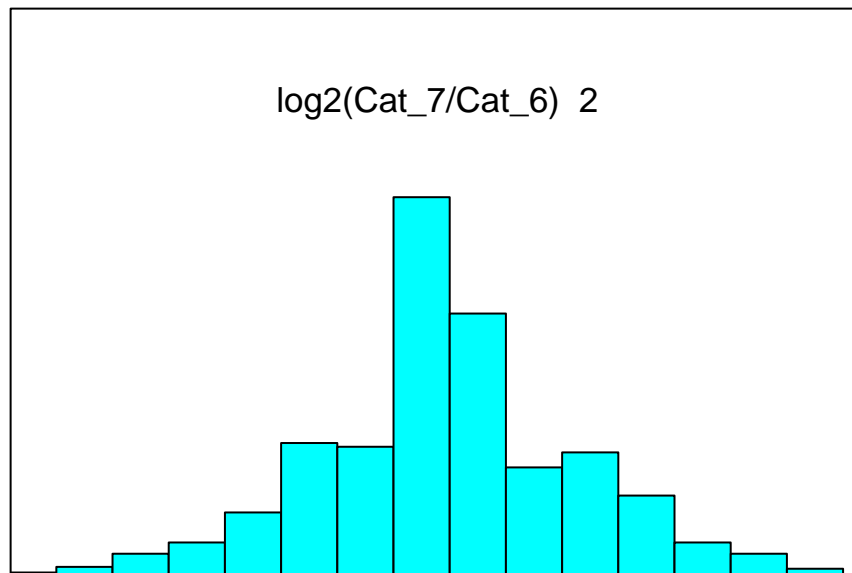

Supplement: supp [file elife-75798-supp-v1.zip]

Value-ordered fold change

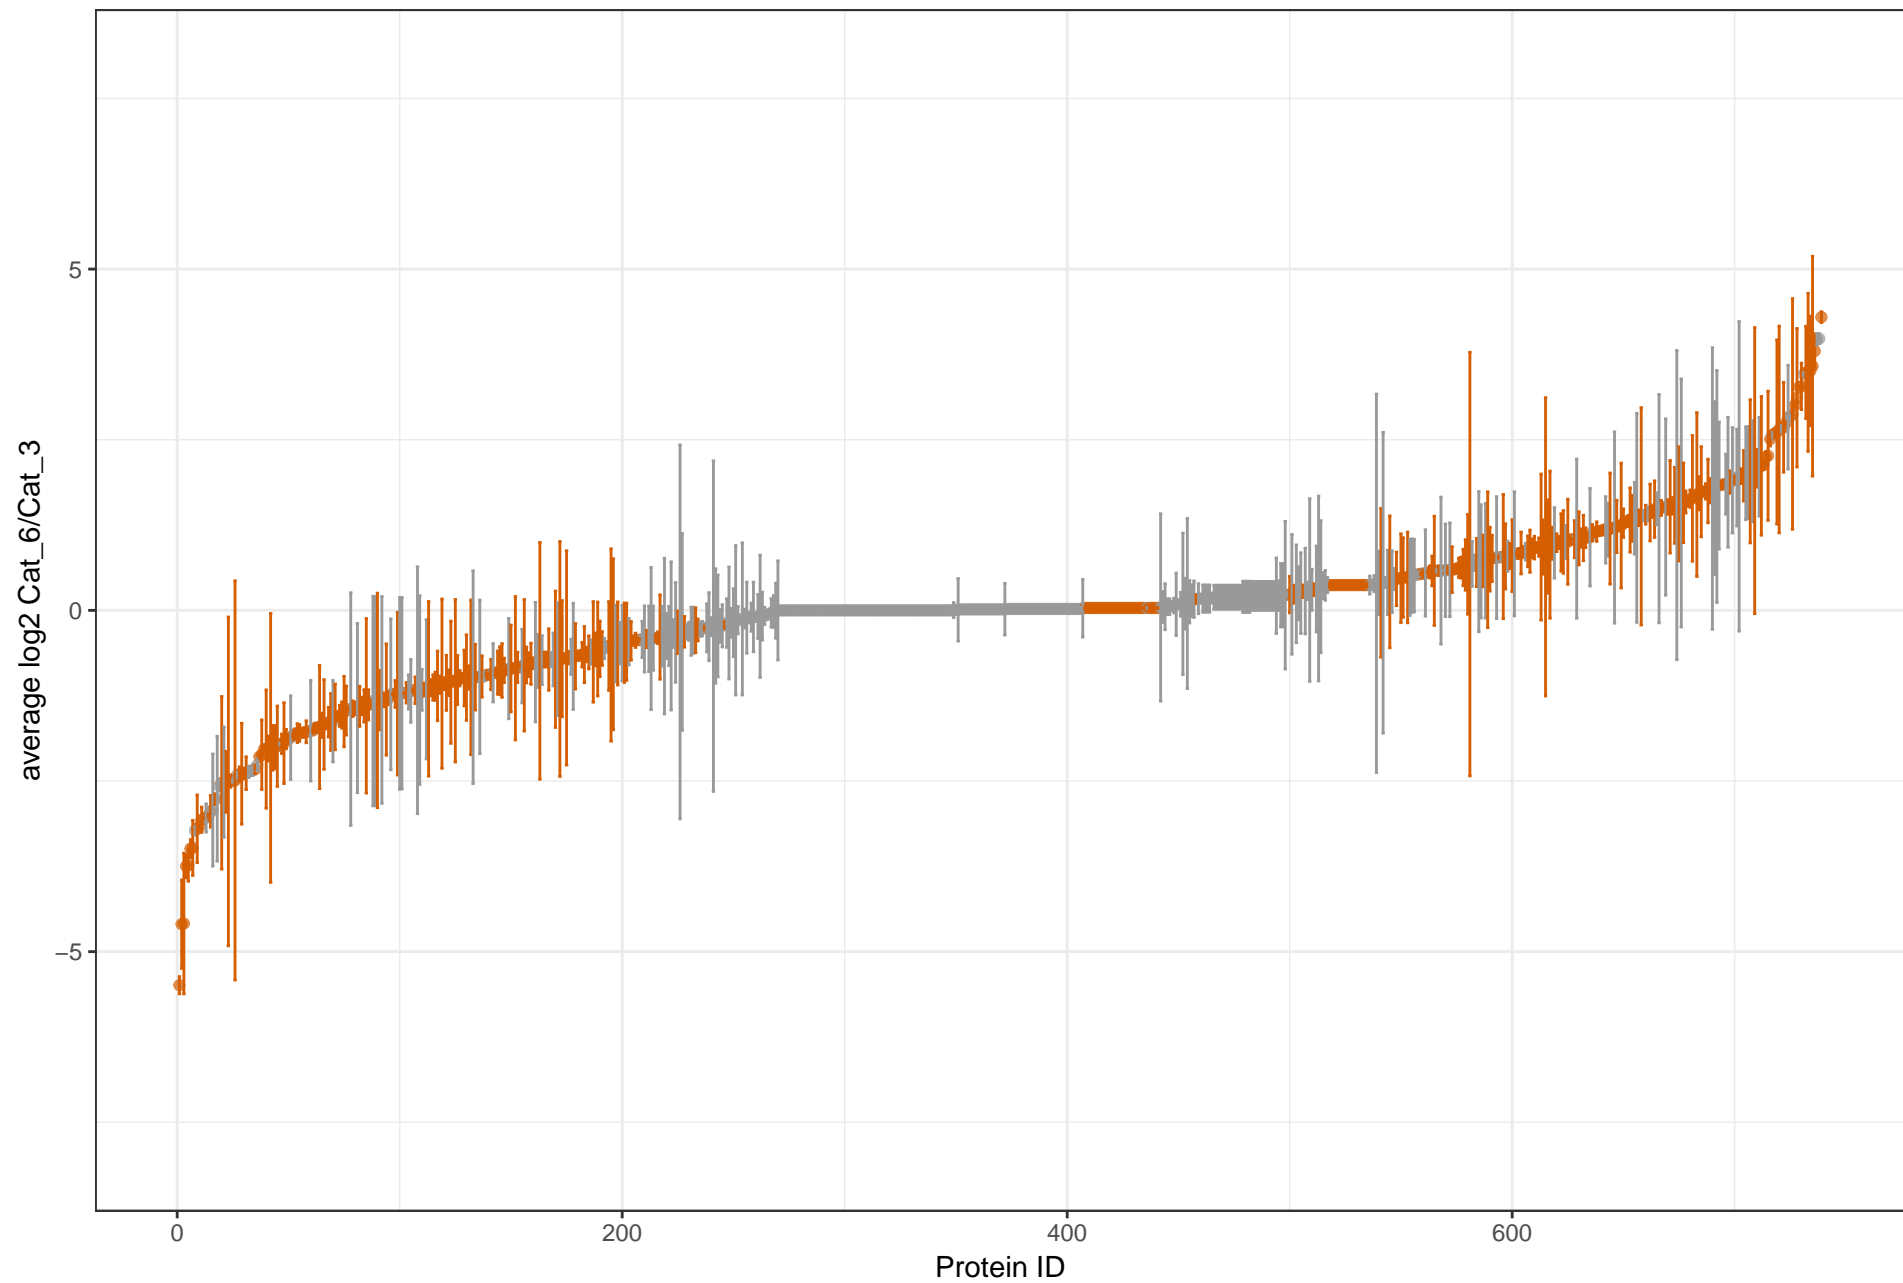

Supplement: supp [file elife-75798-supp-v1.zip]

Value-ordered fold change

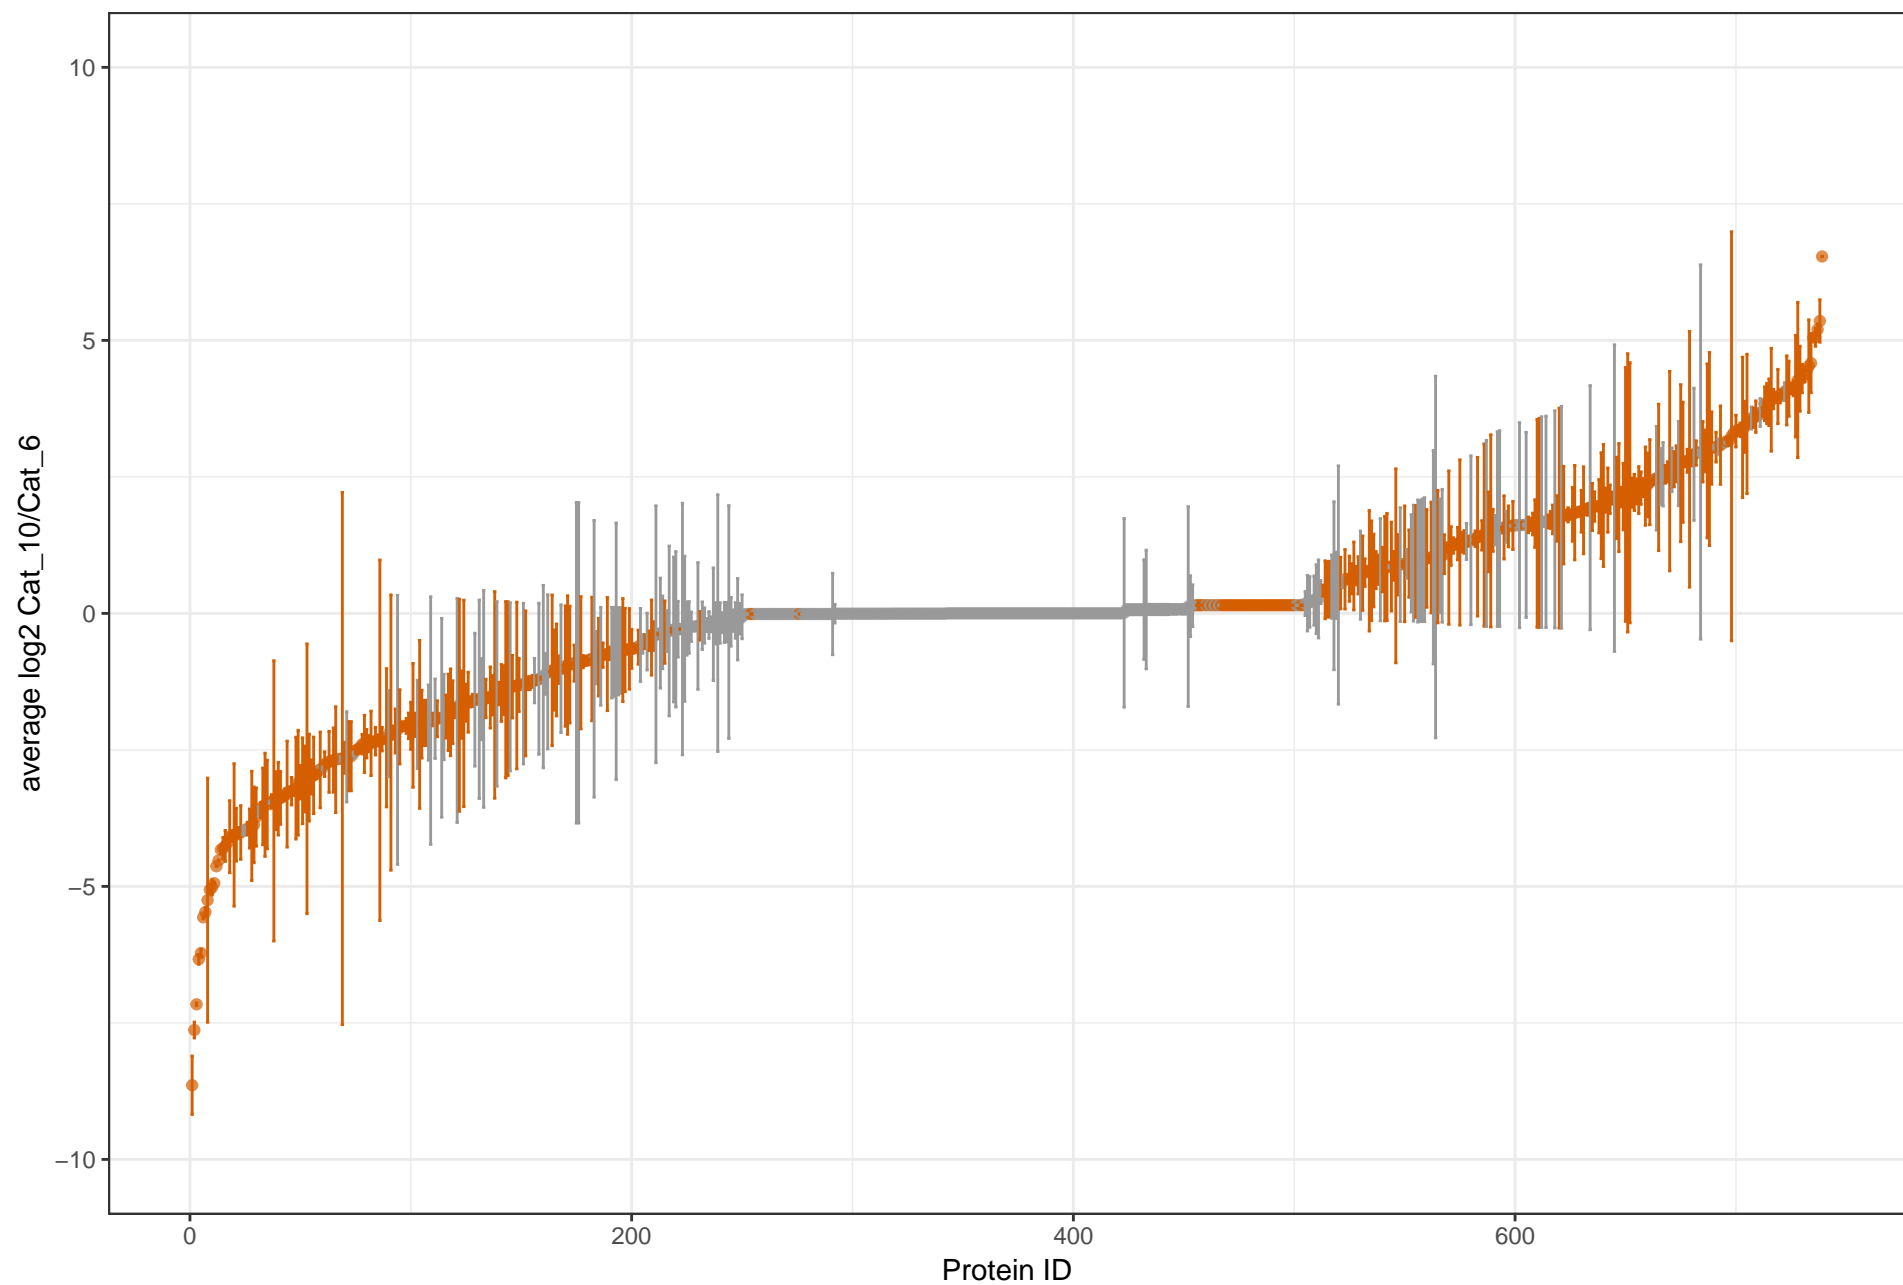

Supplement: supp [file elife-75798-supp-v1.zip]

MA plot

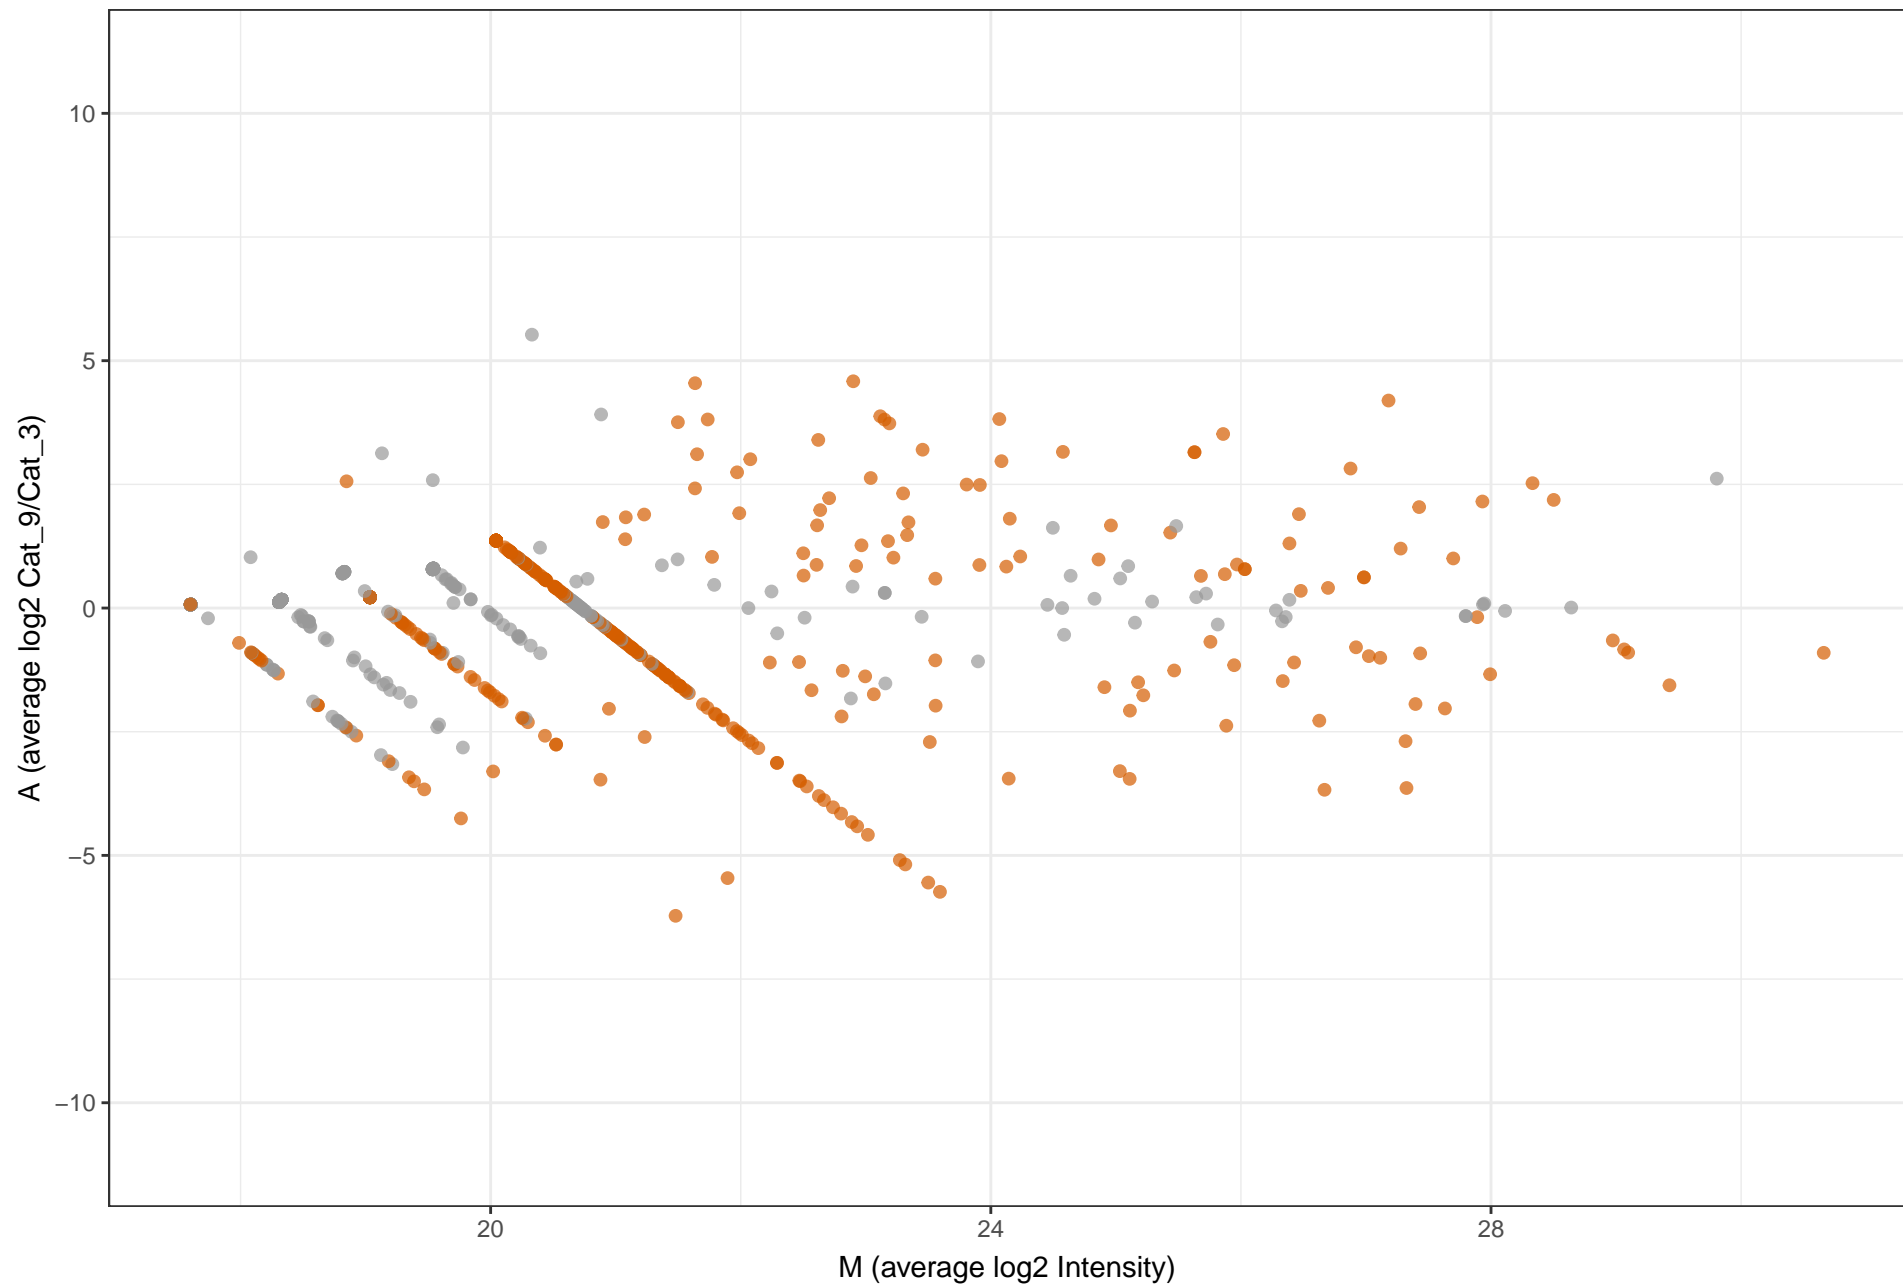

Supplement: supp [file elife-75798-supp-v1.zip]

MA plot

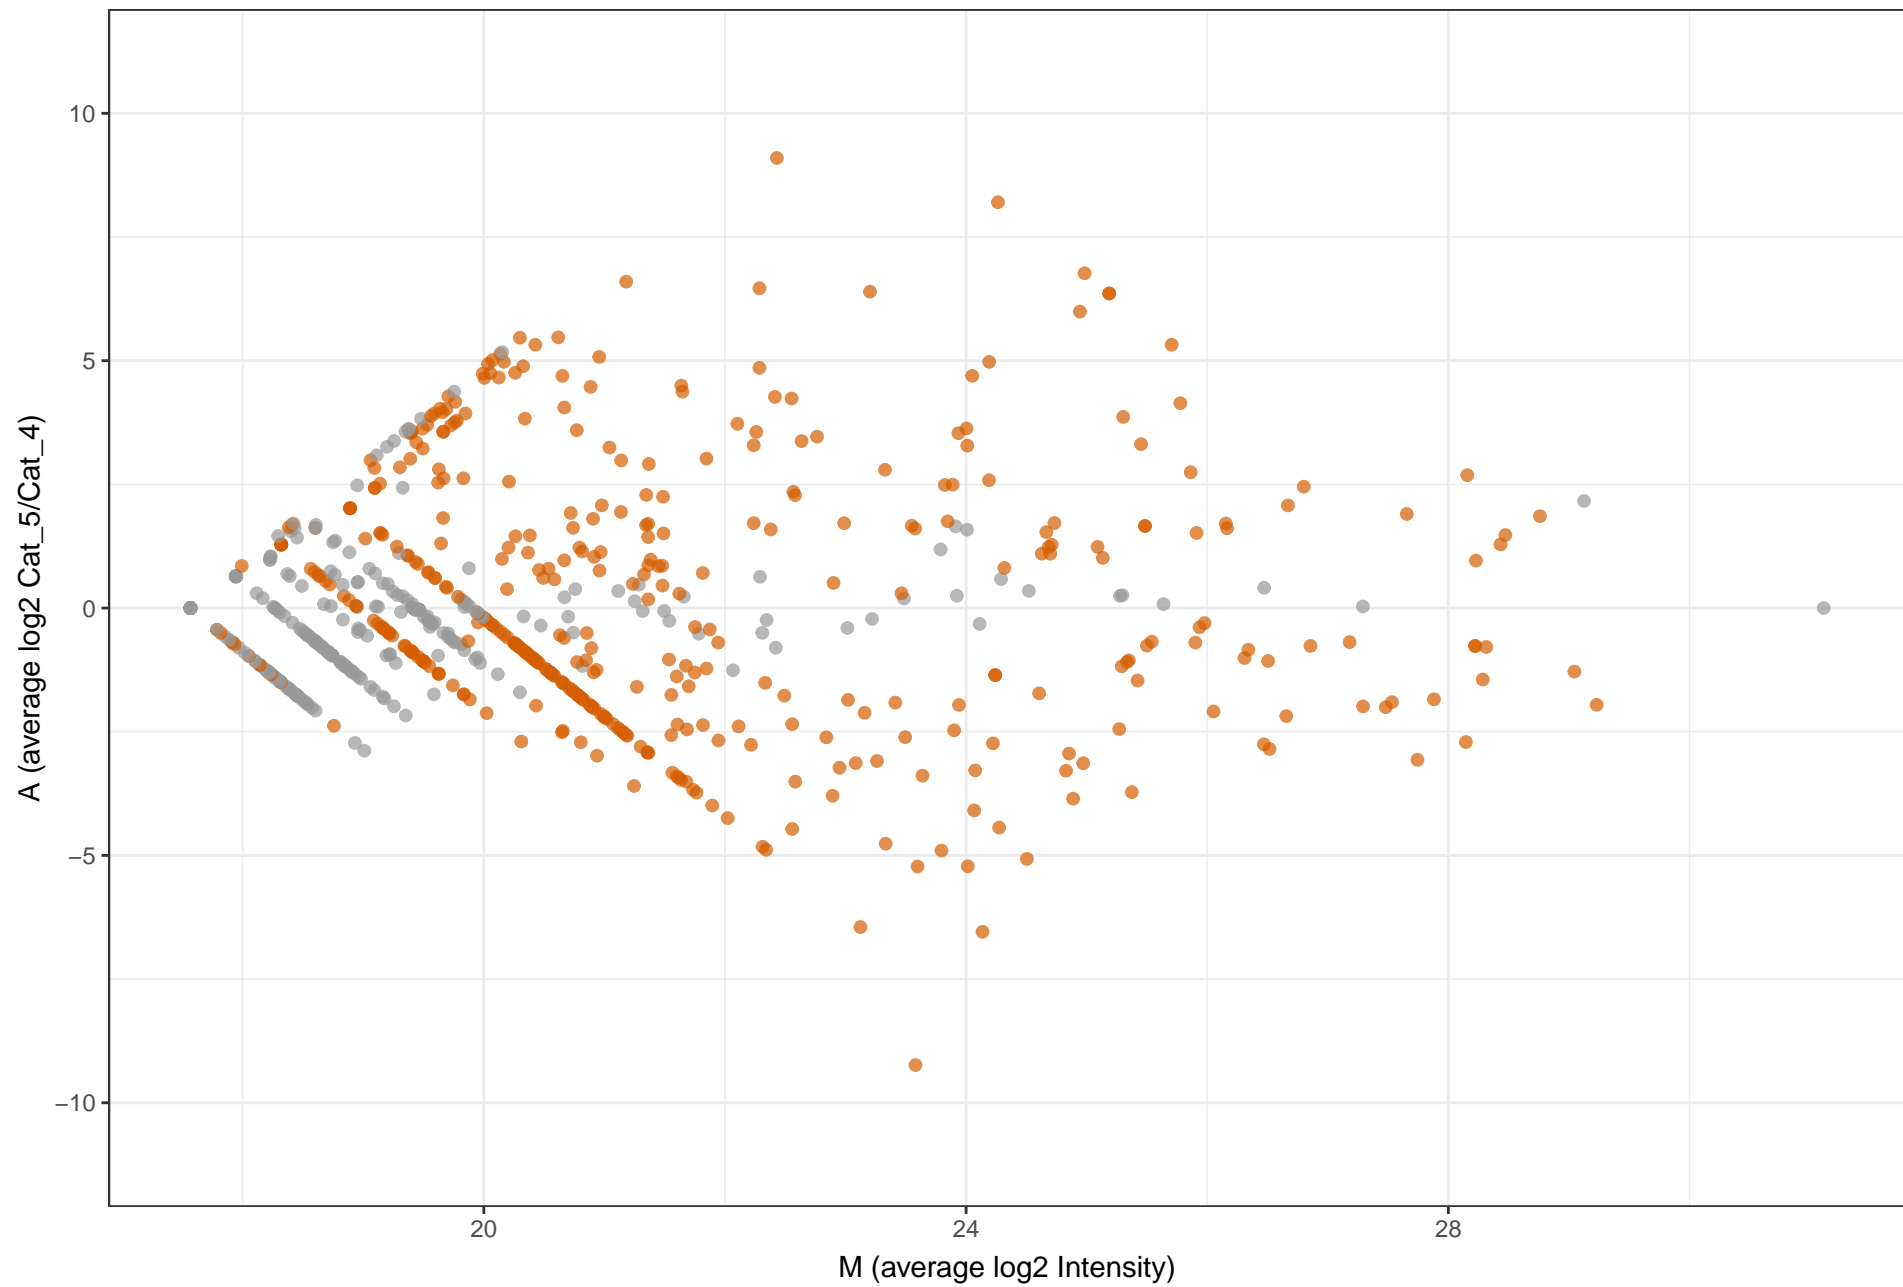

Supplement: supp [file elife-75798-supp-v1.zip]

MA plot

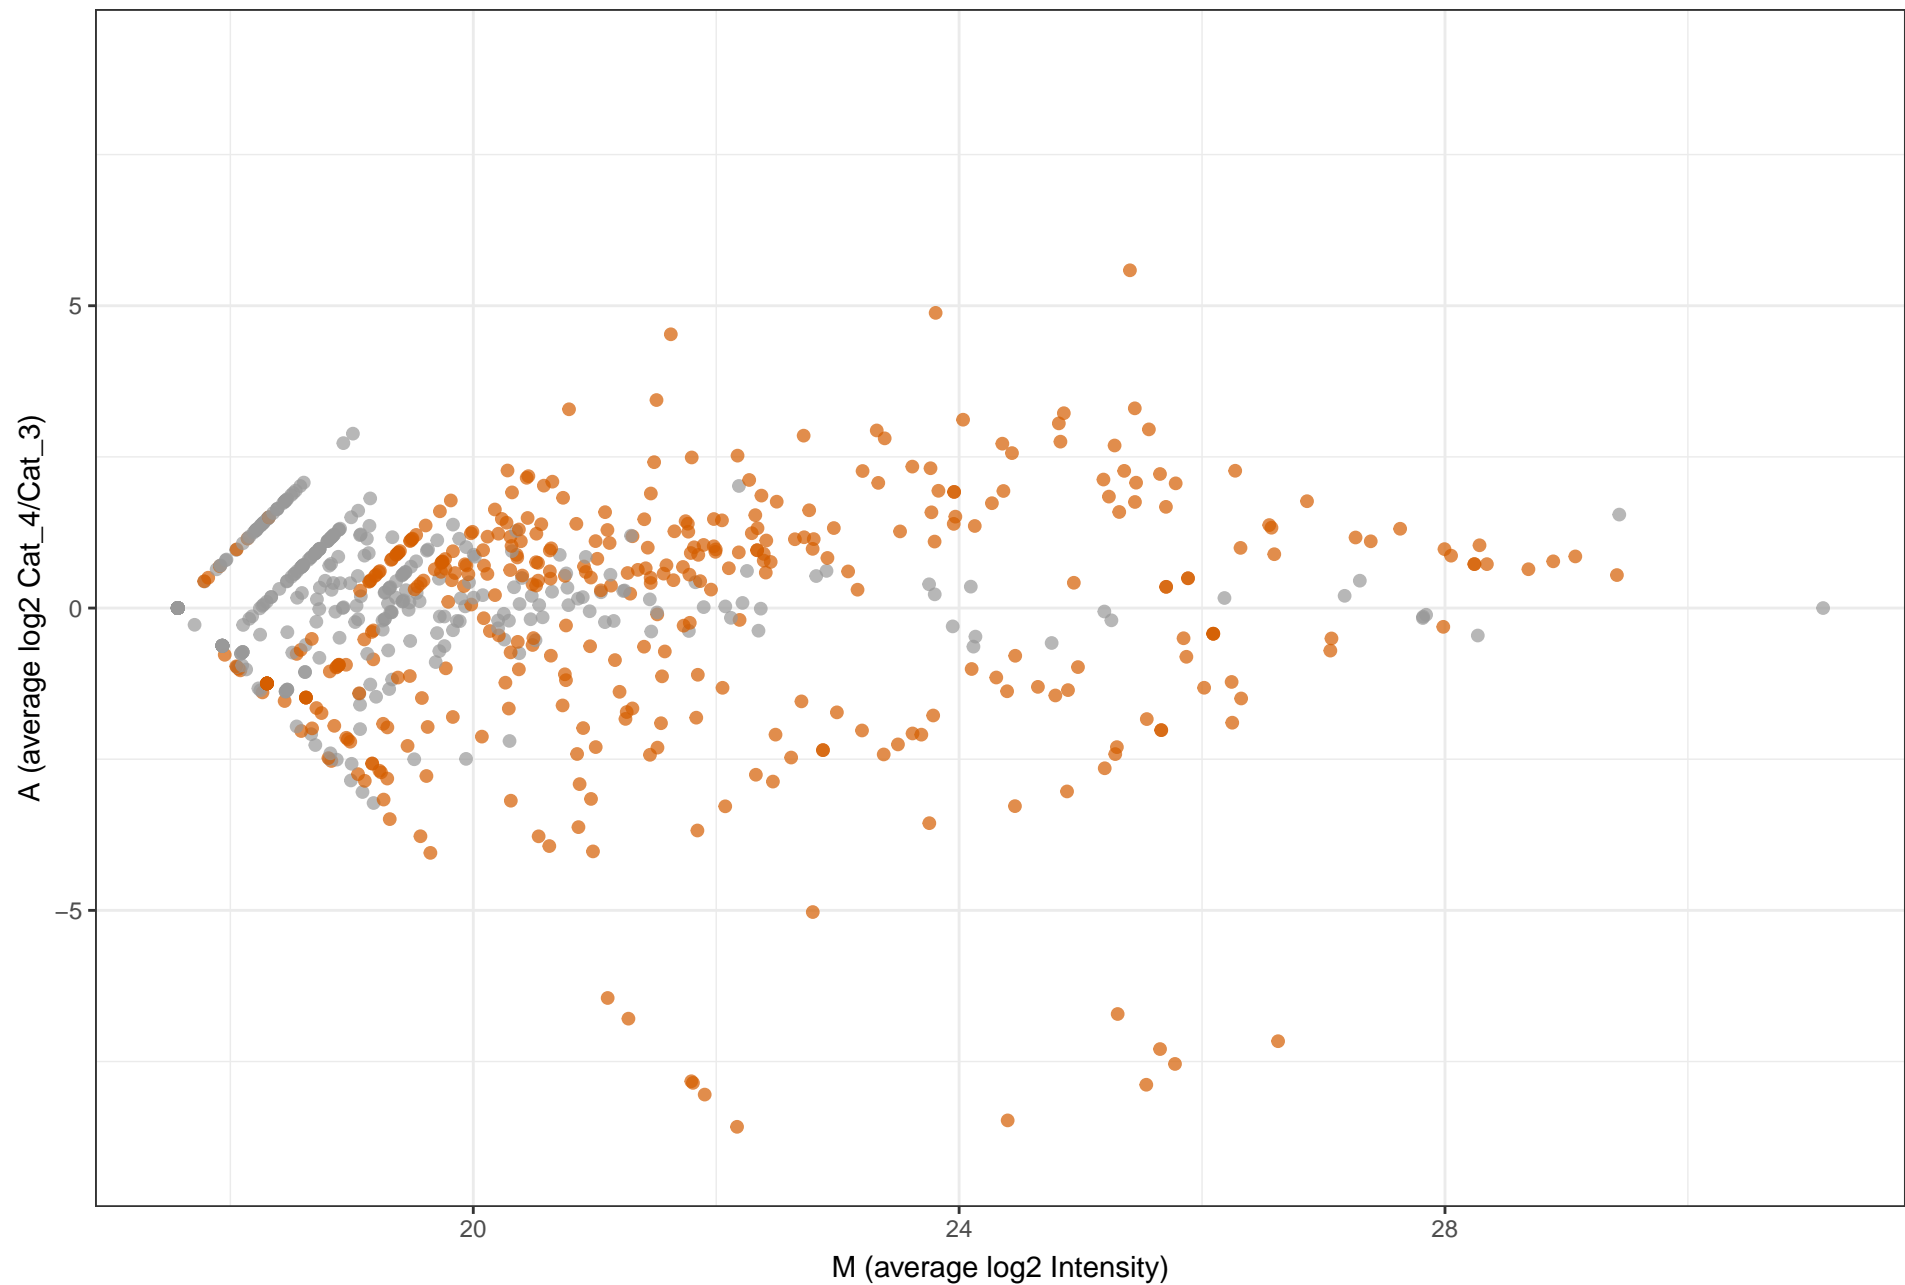

Supplement: supp [file elife-75798-supp-v1.zip]

Value-ordered fold change

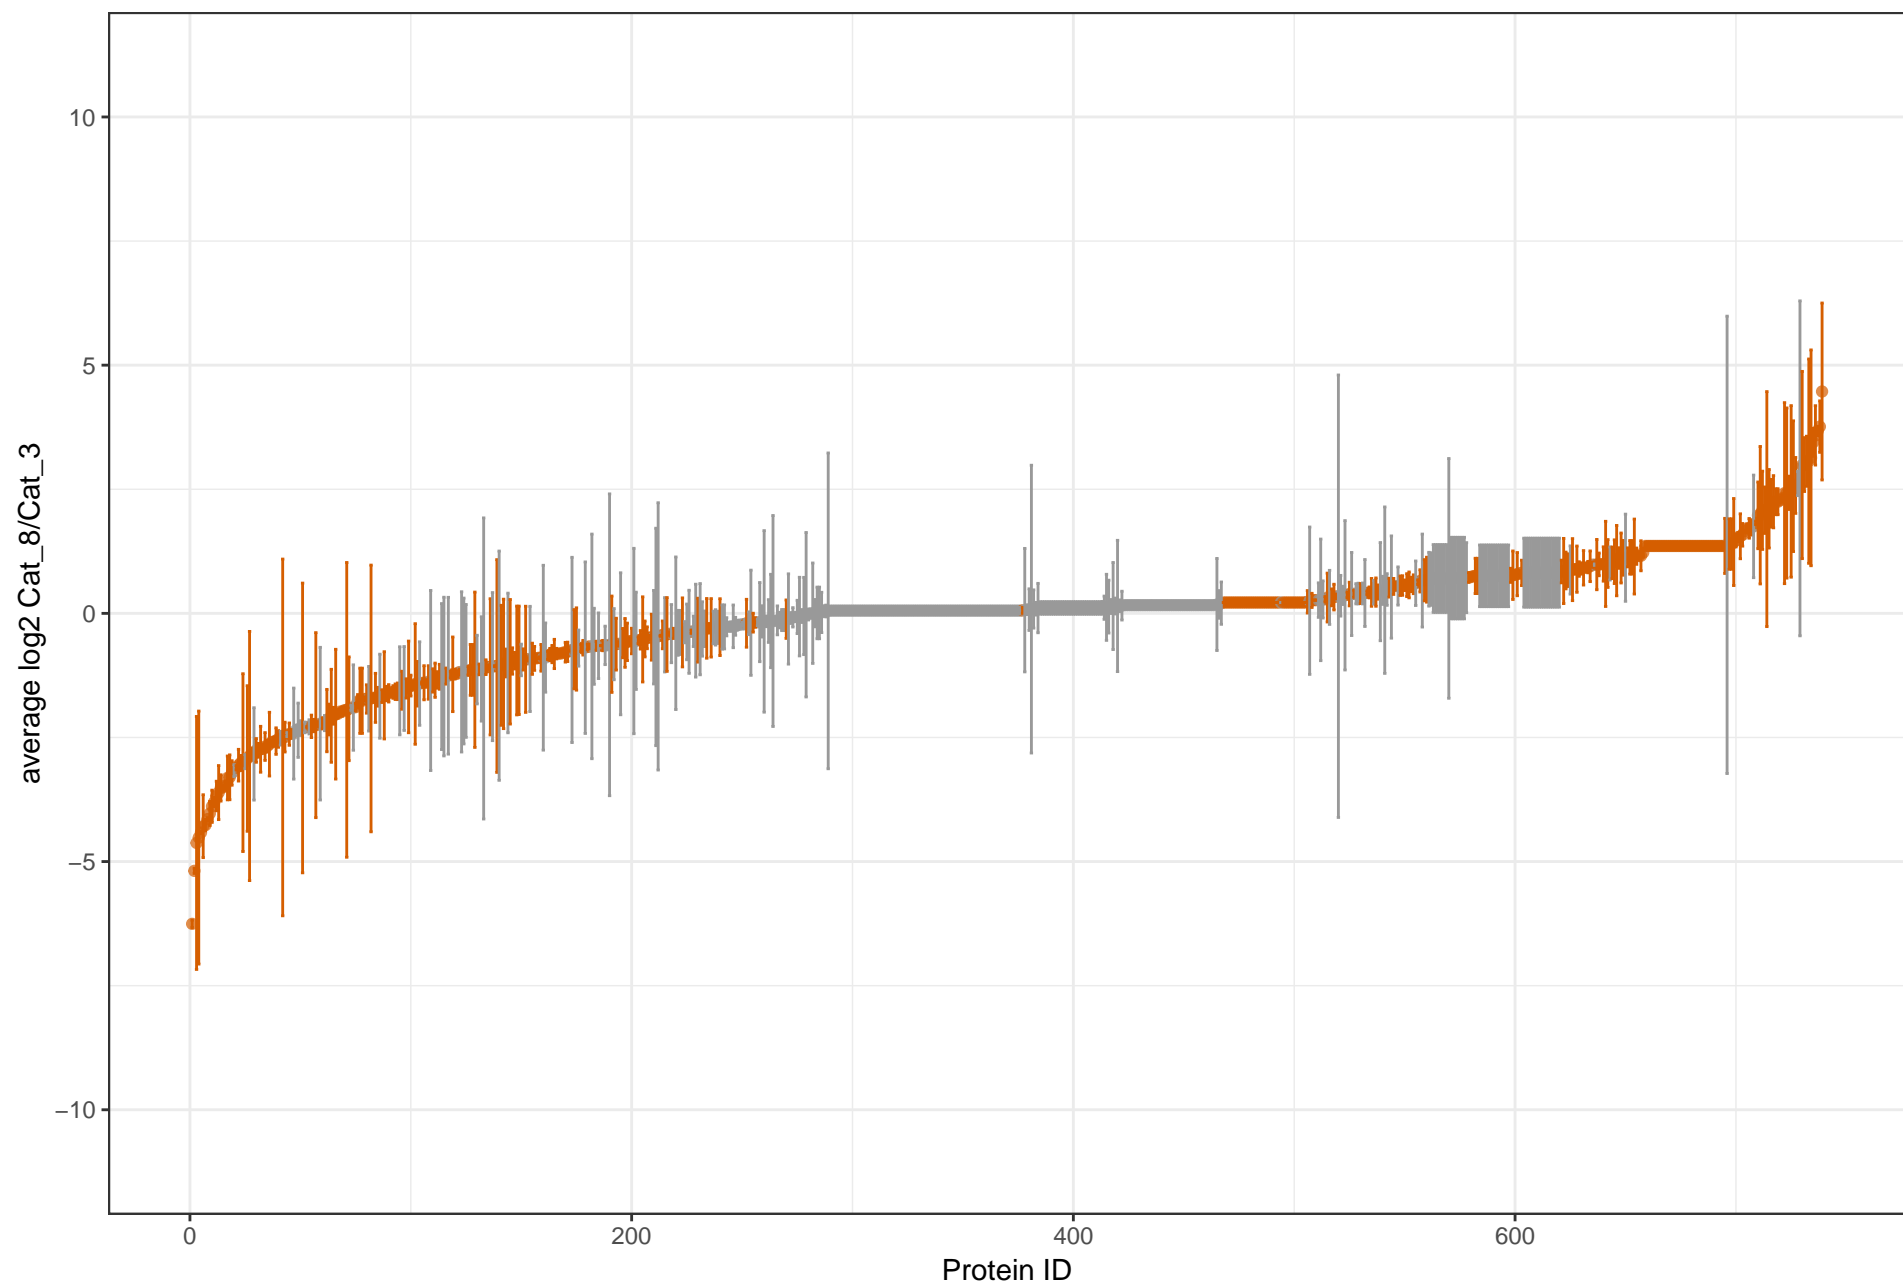

Supplement: supp [file elife-75798-supp-v1.zip]

Value-ordered fold change

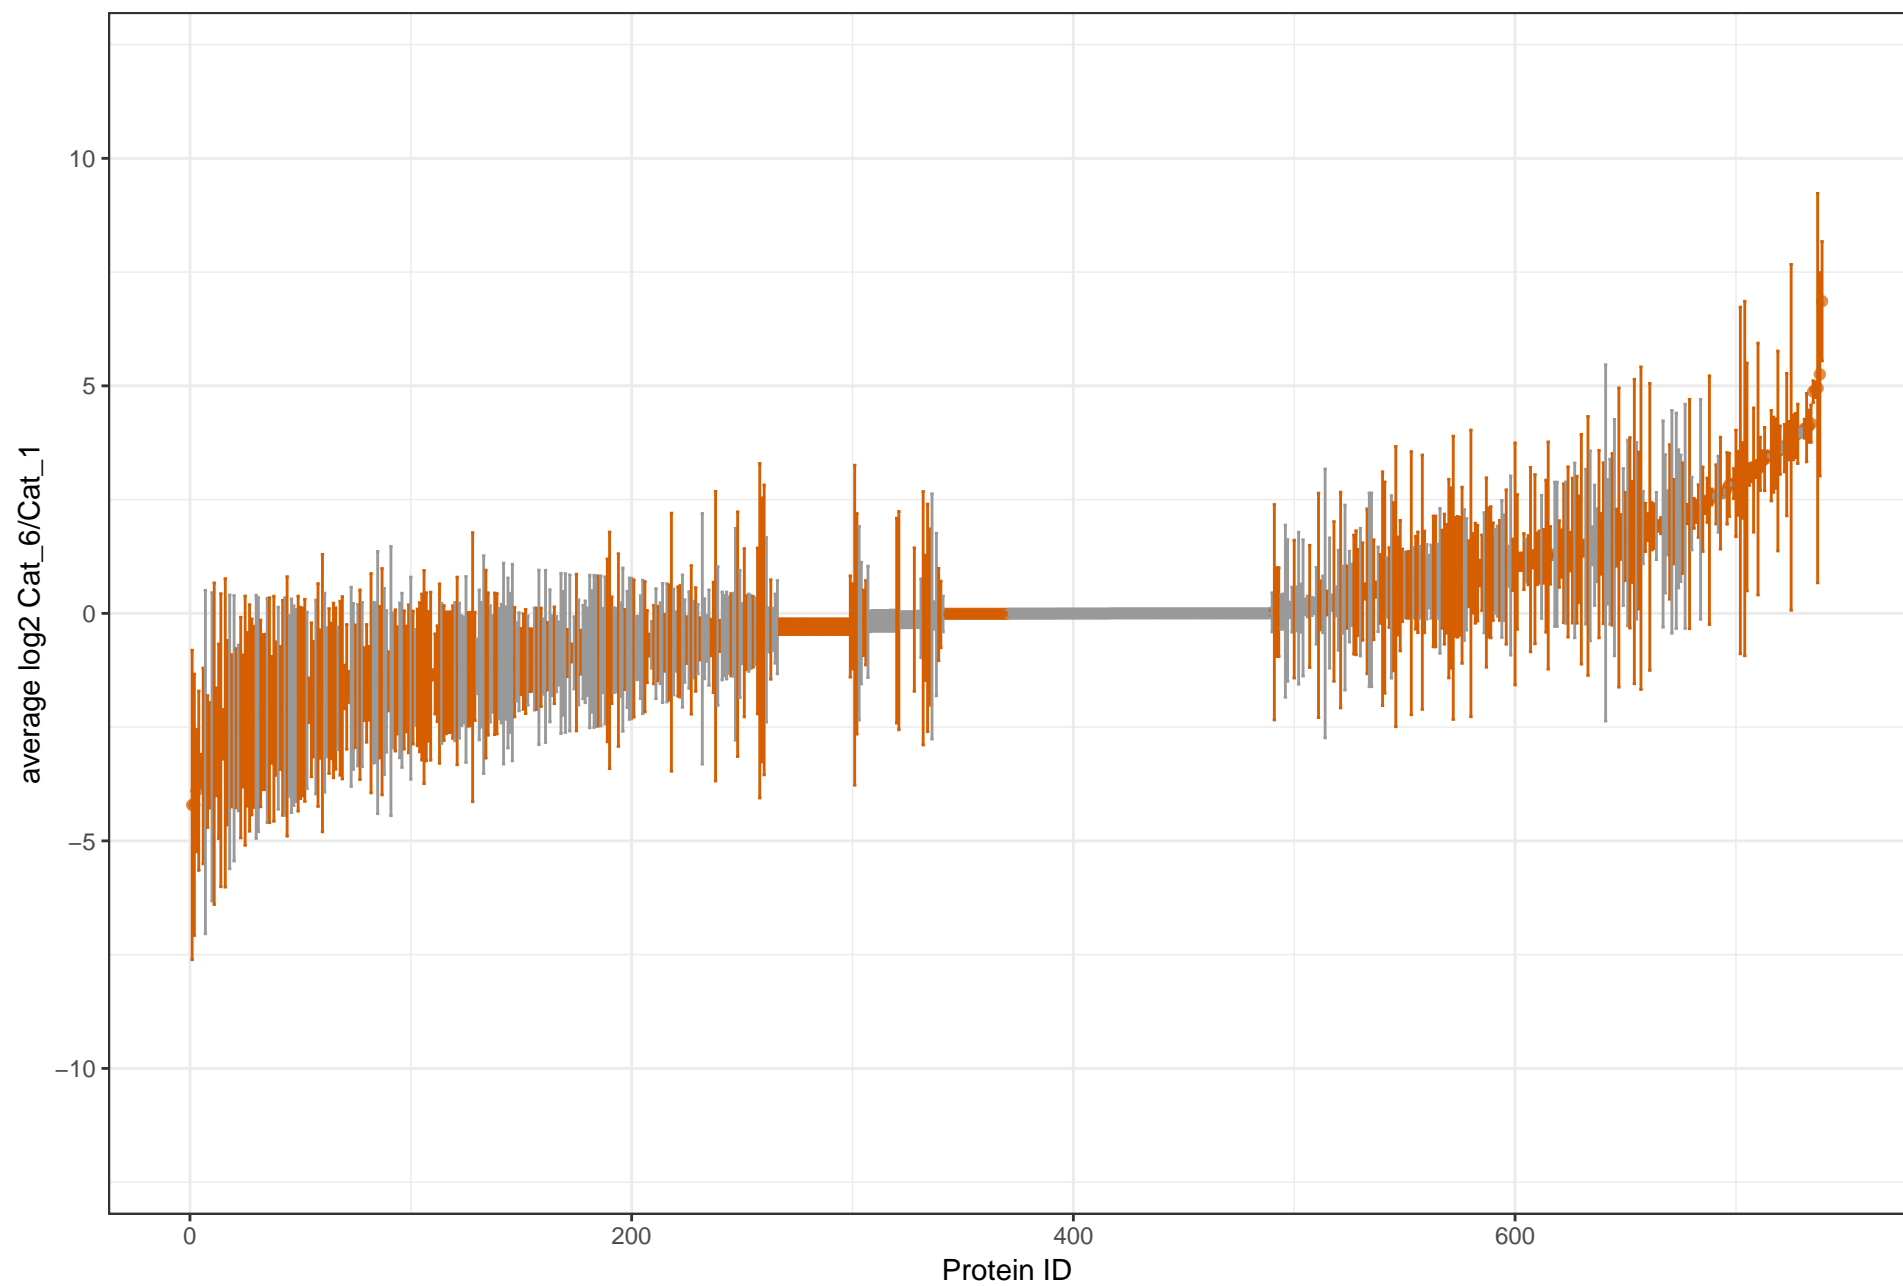

Supplement: supp [file elife-75798-supp-v1.zip]

MA plot

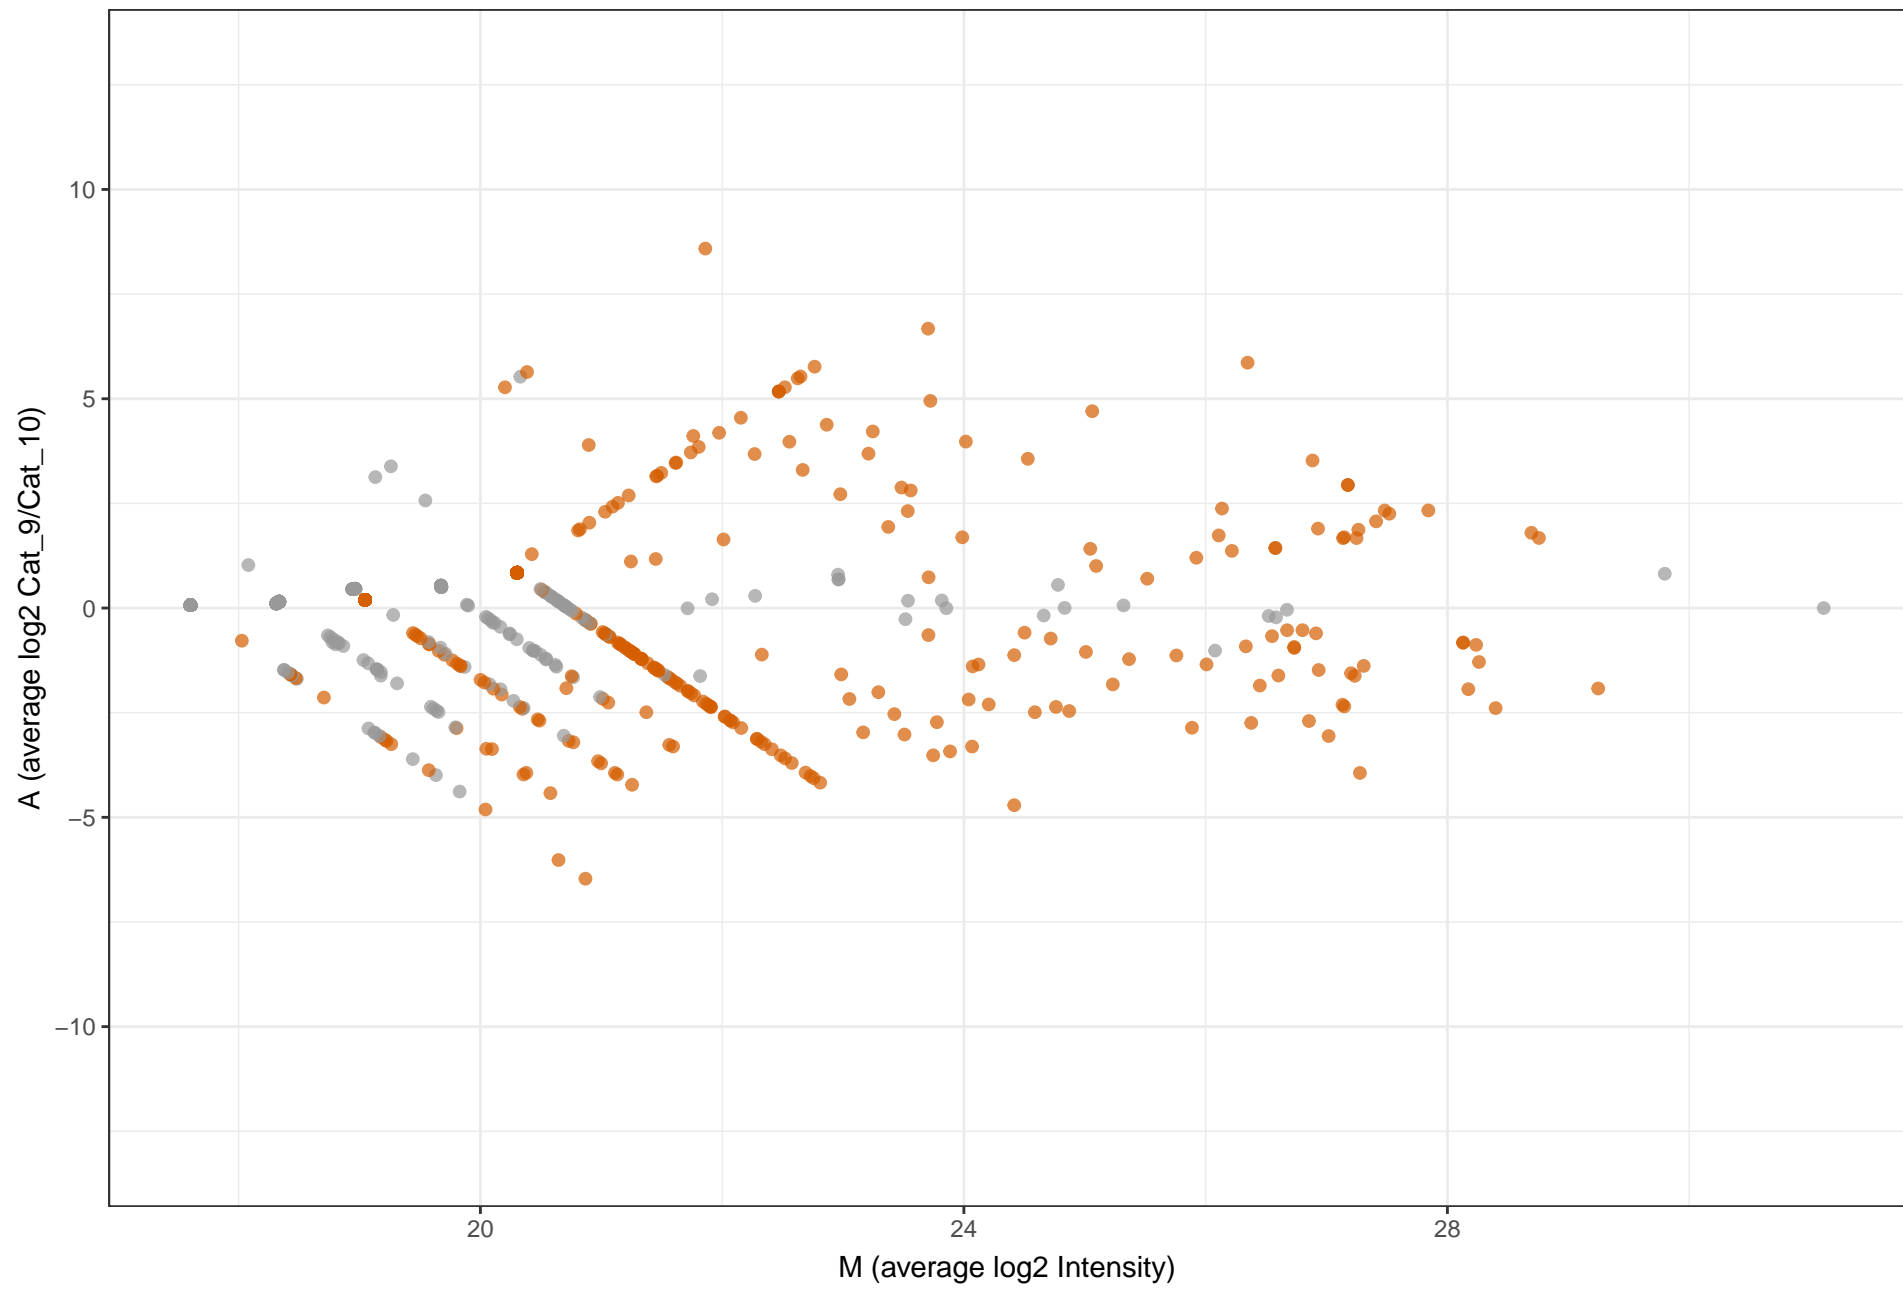

Supplement: supp [file elife-75798-supp-v1.zip]

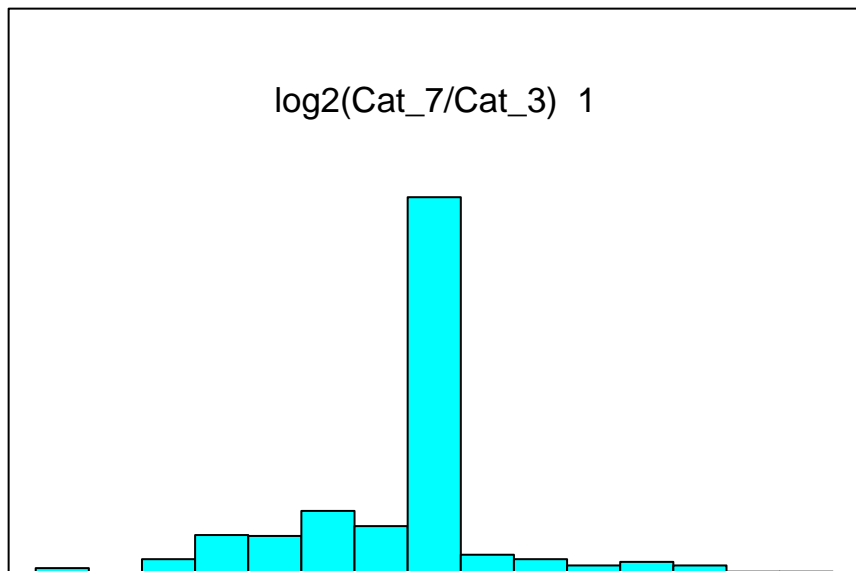

-5 0 5 10

5  
0  
-5

0.73

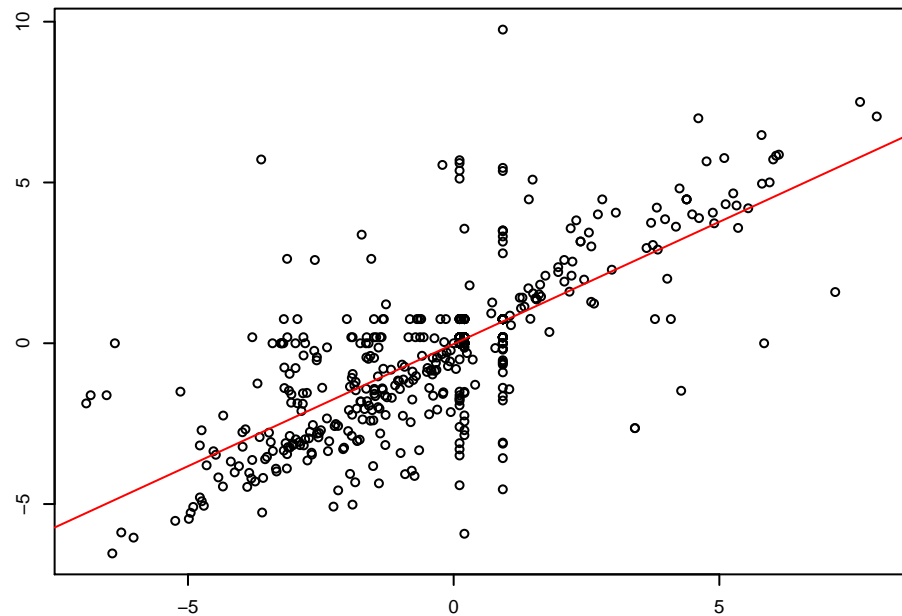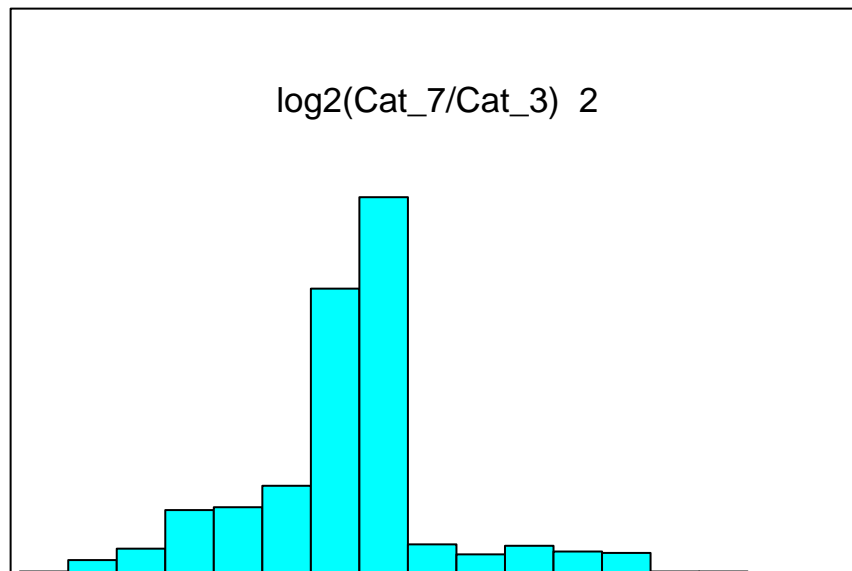

Supplement: supp [file elife-75798-supp-v1.zip]

Value-ordered fold change

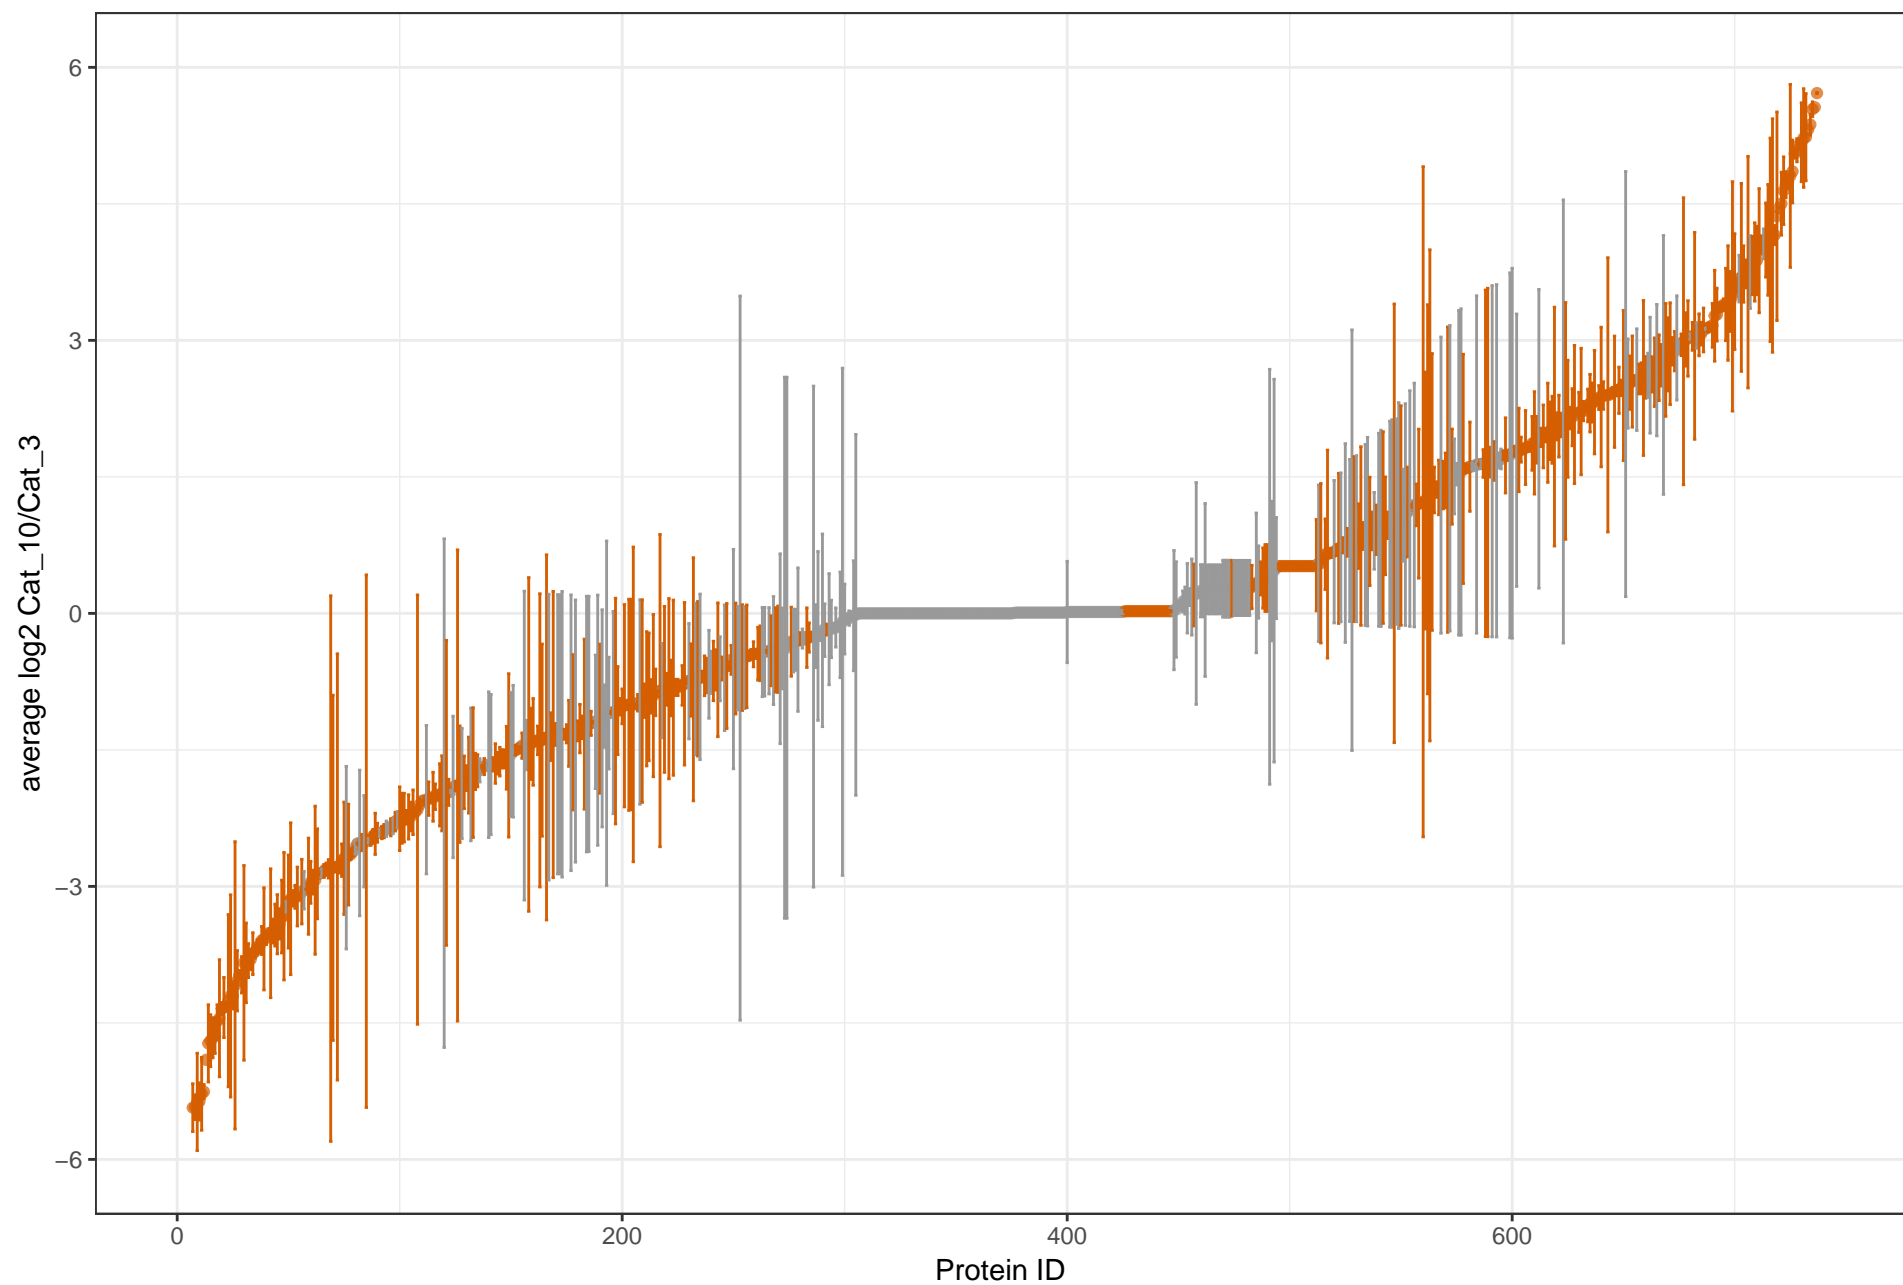

Supplement: supp [file elife-75798-supp-v1.zip]

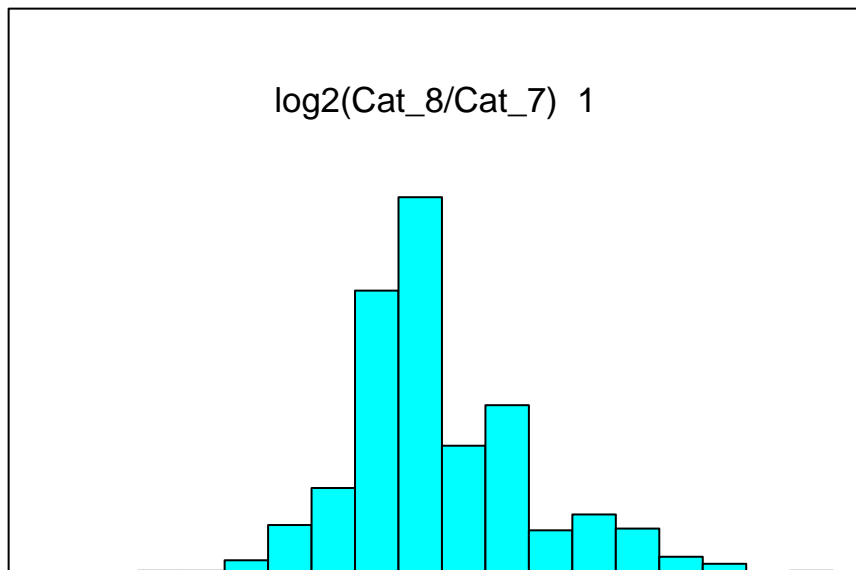

-5 0 5

5  
0  
-5

0.85

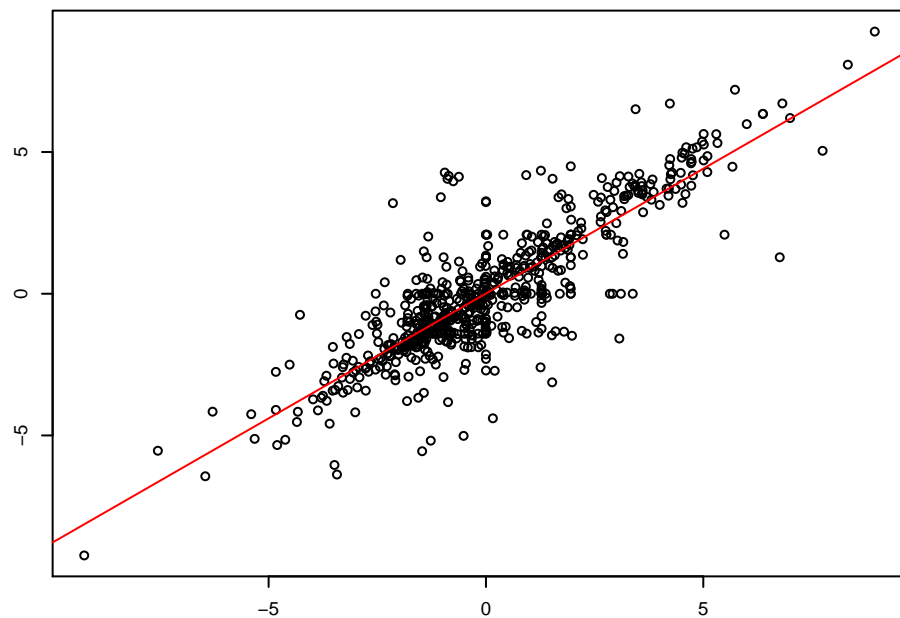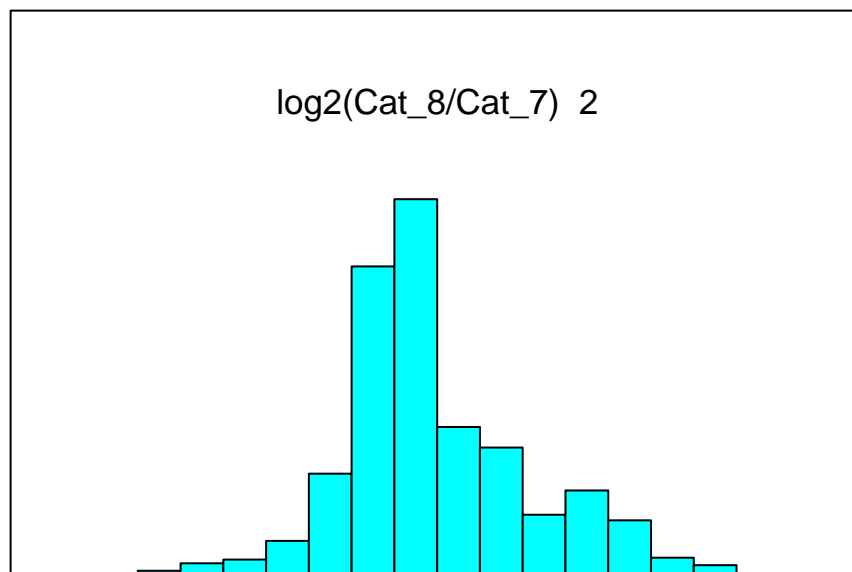

Supplement: supp [file elife-75798-supp-v1.zip]

P-value vs Fold change

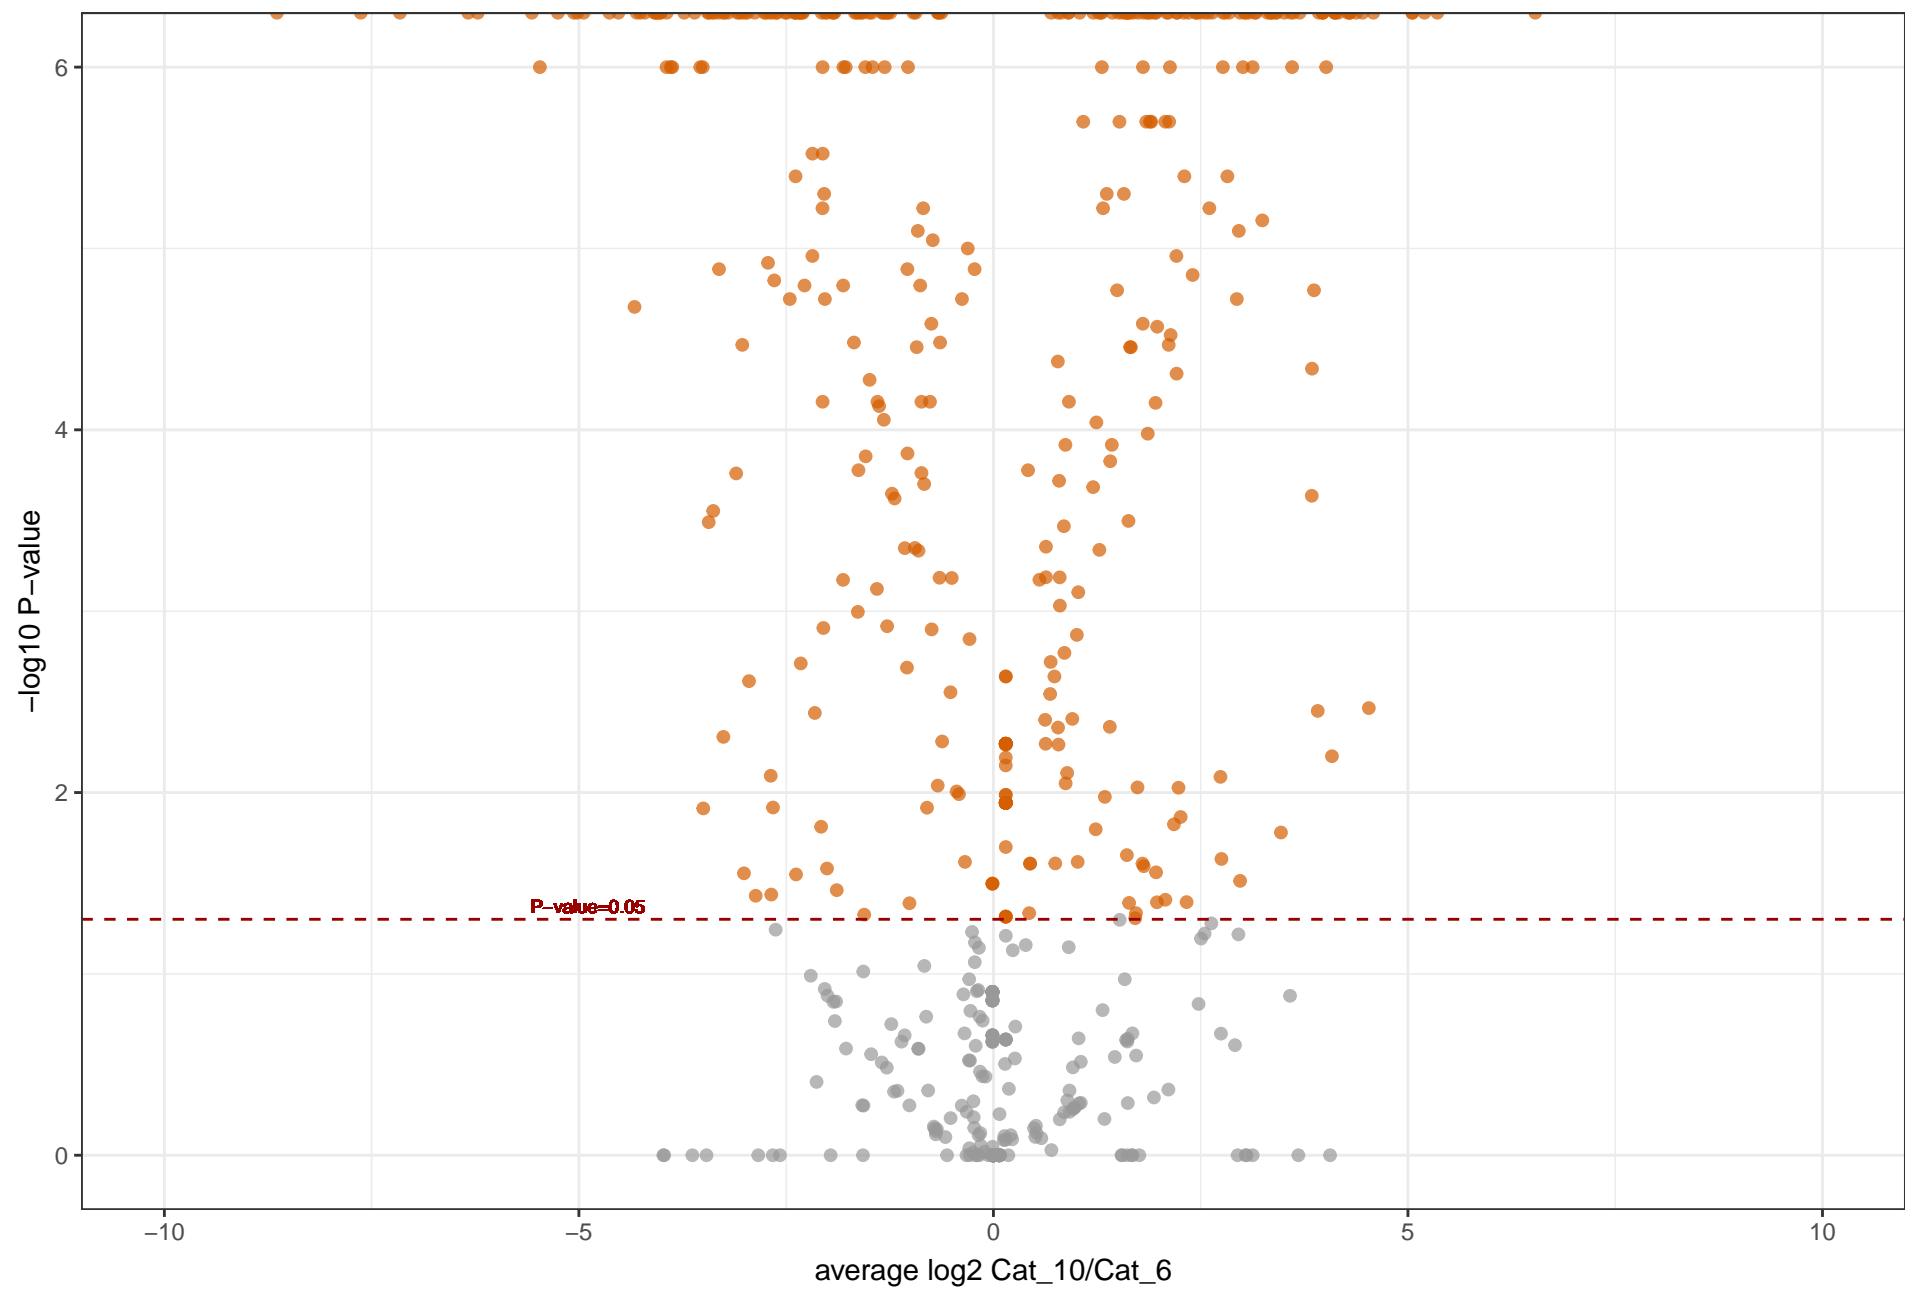

Supplement: supp [file elife-75798-supp-v1.zip]

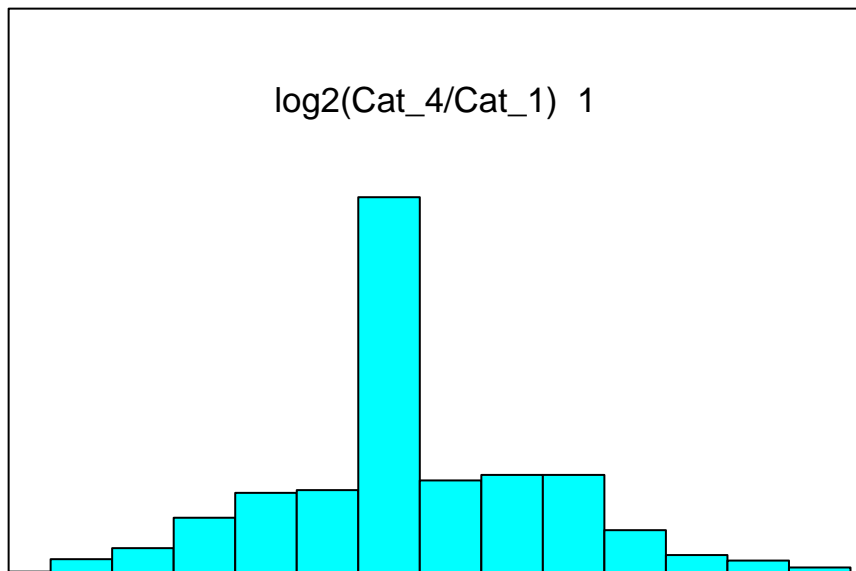

-6 -4 -2 0 2 4 6

6  
4  
2  
0  
-2  
-4  
-6

0.82

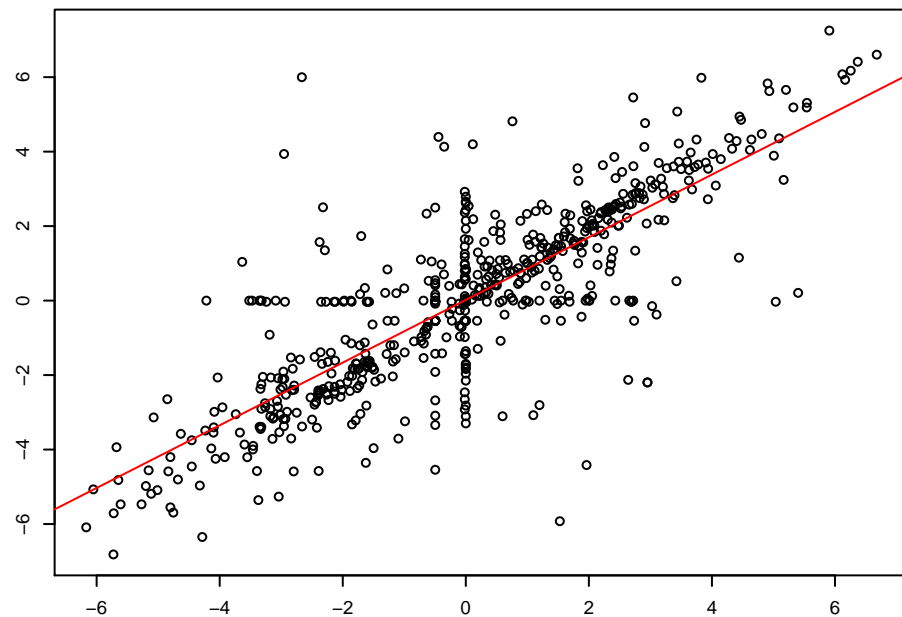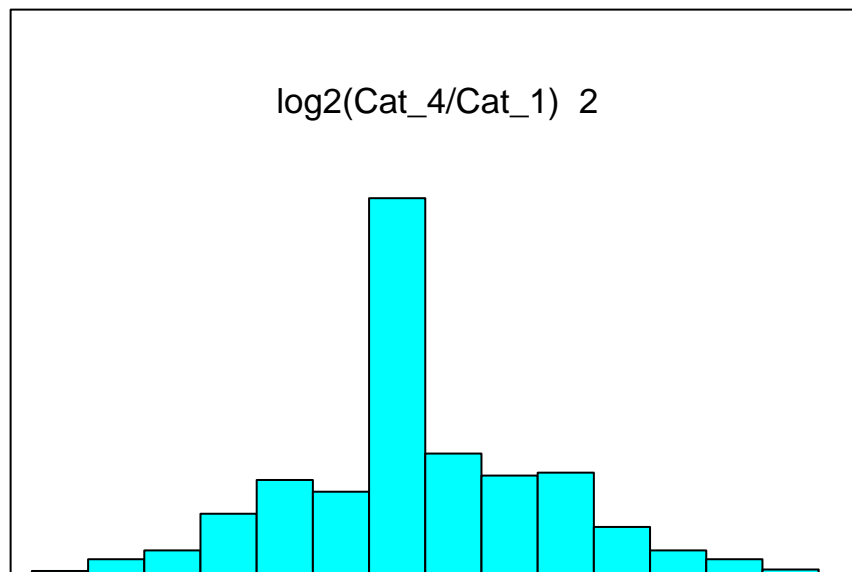

Supplement: supp [file elife-75798-supp-v1.zip]

Value-ordered fold change

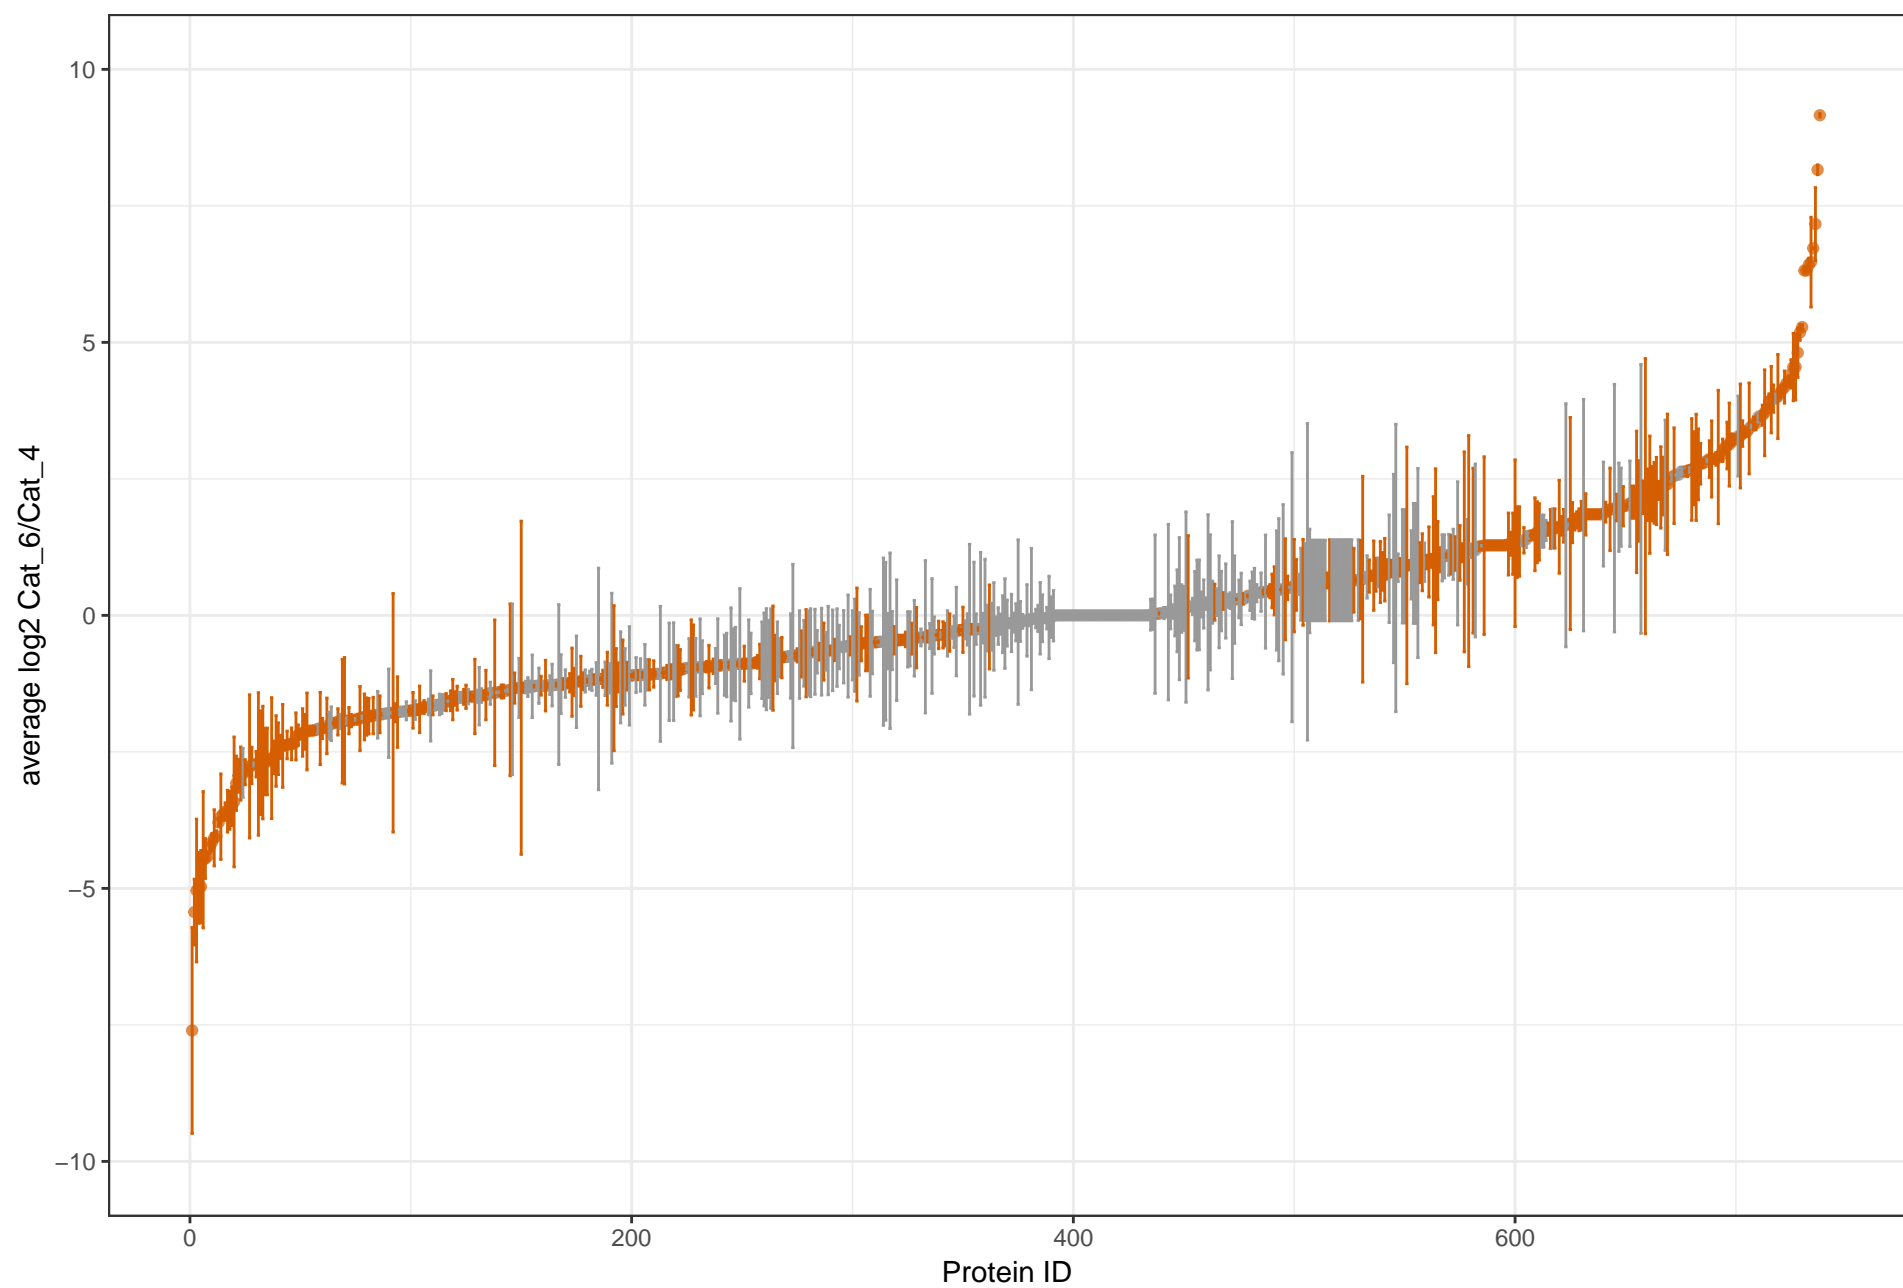

Supplement: supp [file elife-75798-supp-v1.zip]

P-value vs Fold change

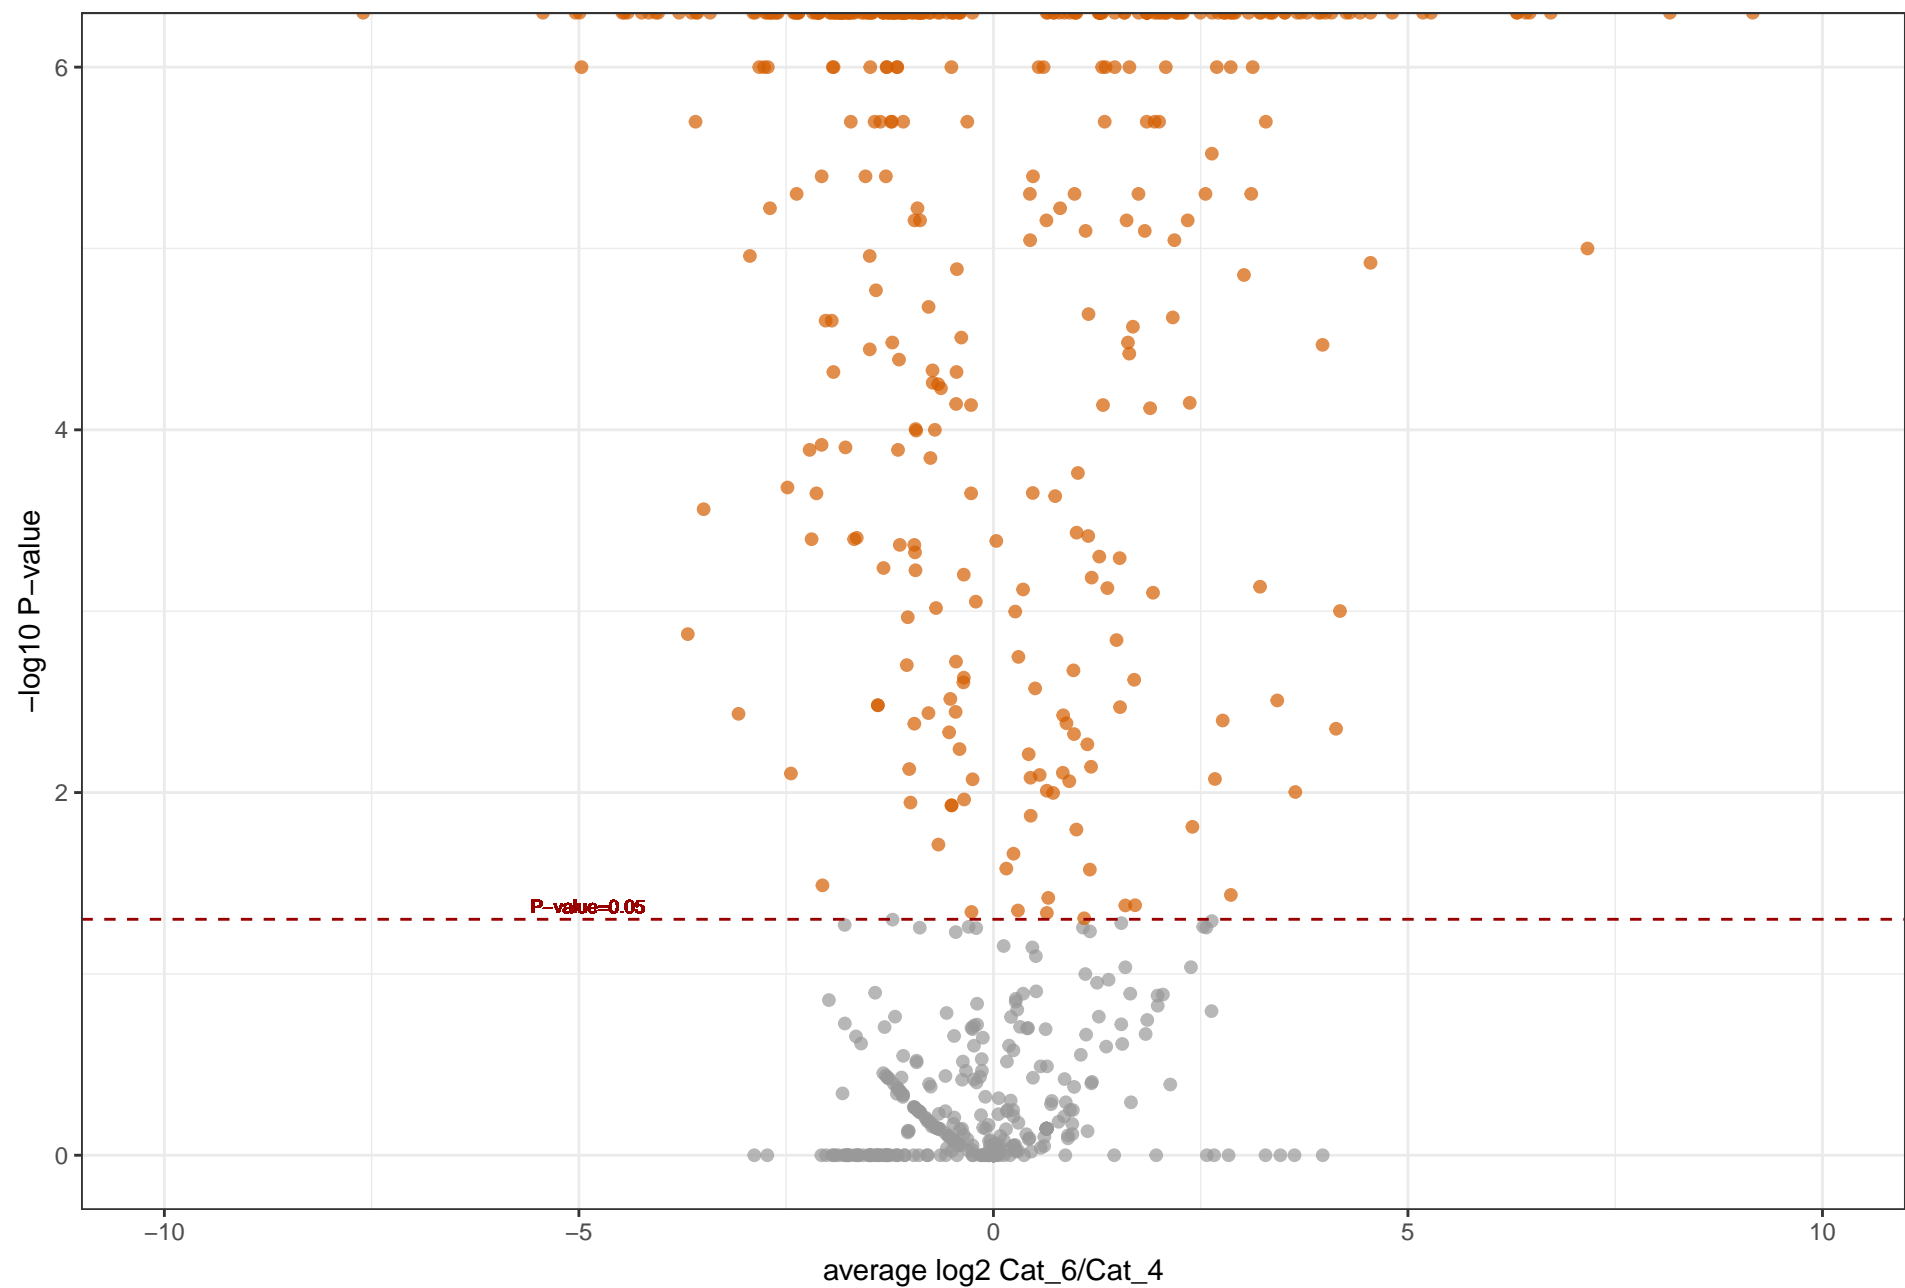

Supplement: supp [file elife-75798-supp-v1.zip]

P-value vs Fold change

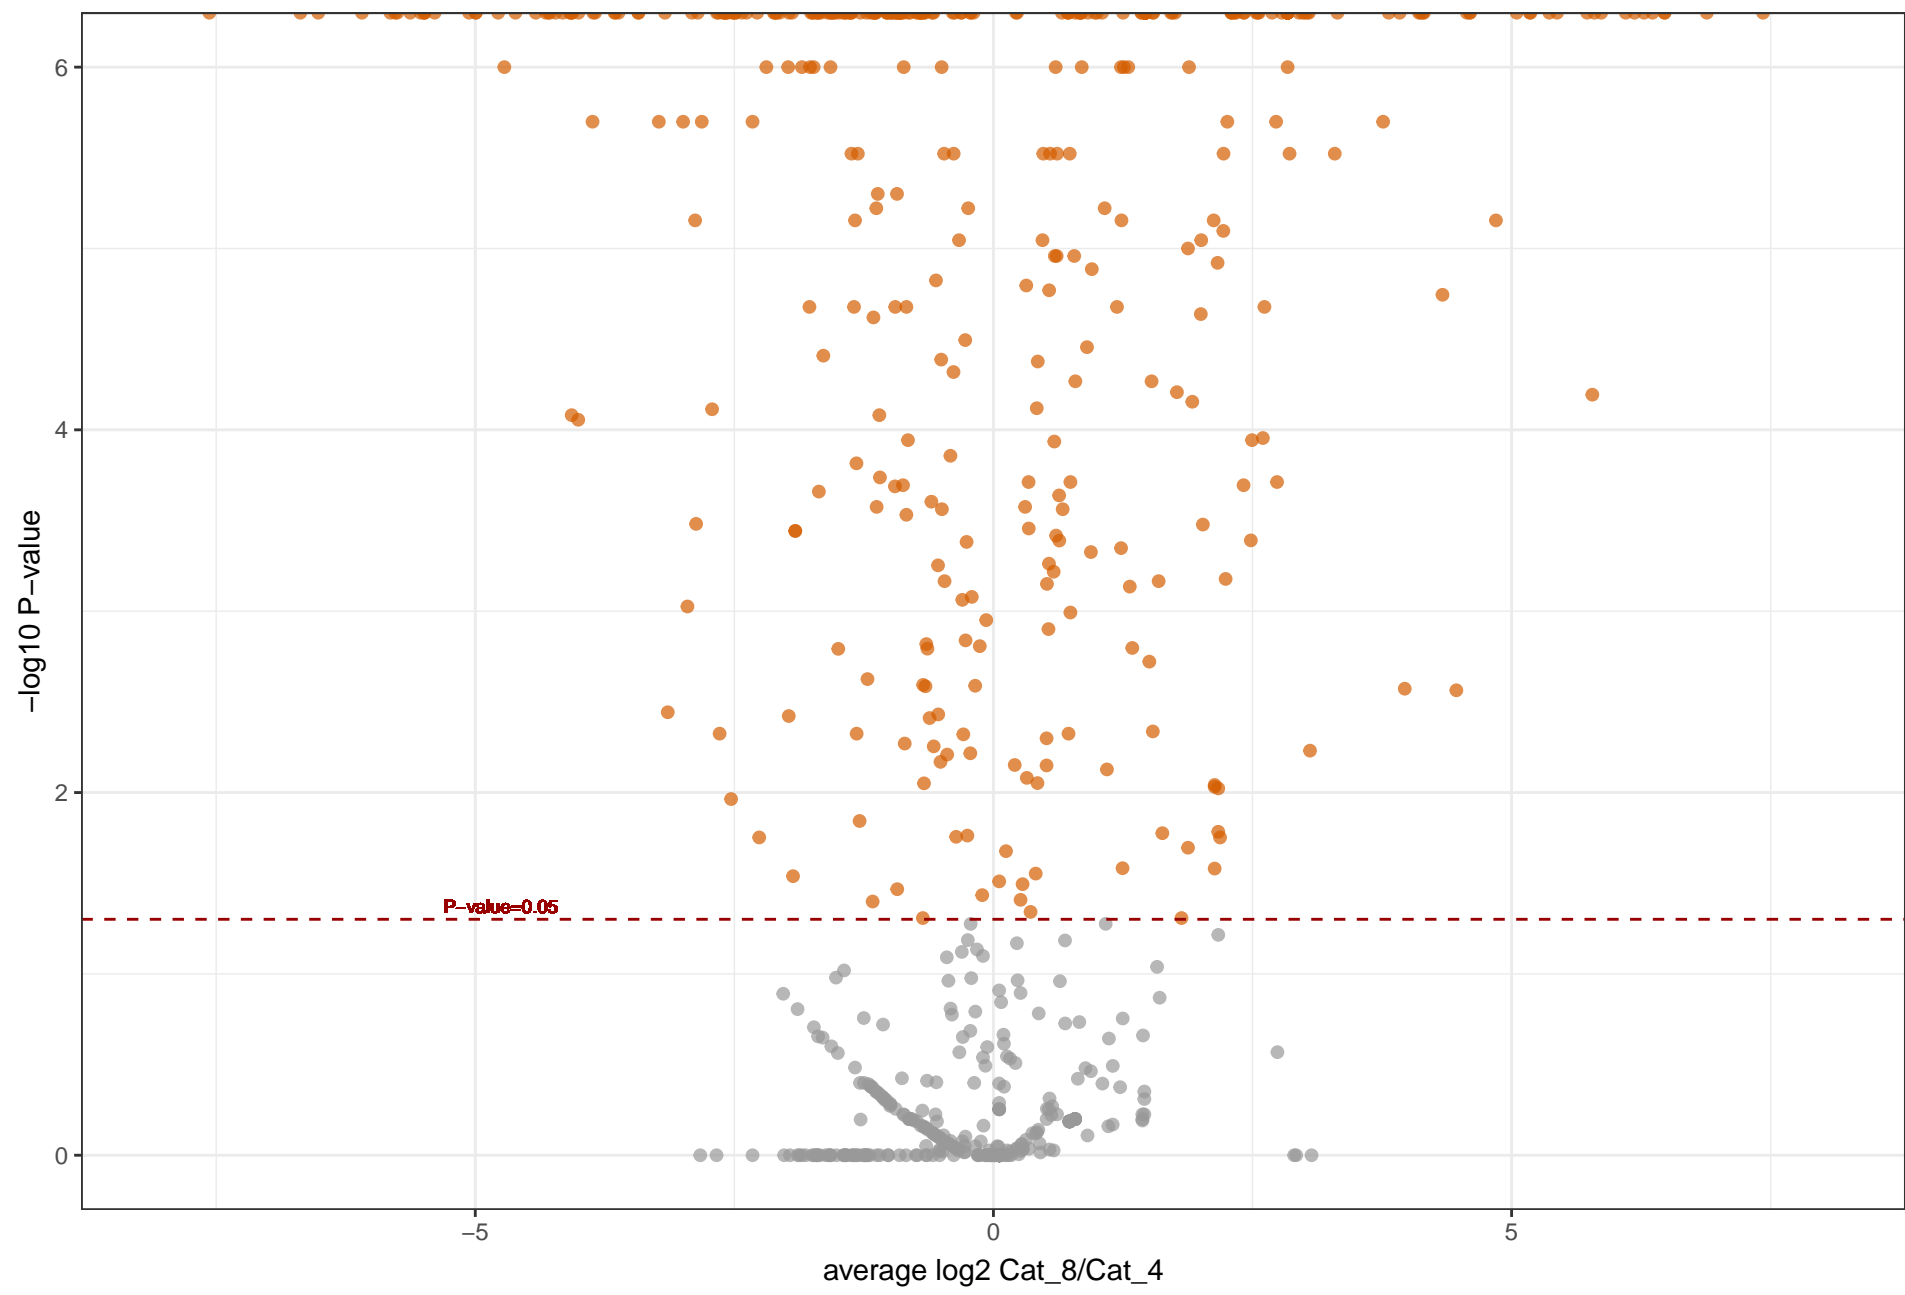

Supplement: supp [file elife-75798-supp-v1.zip]

MA plot

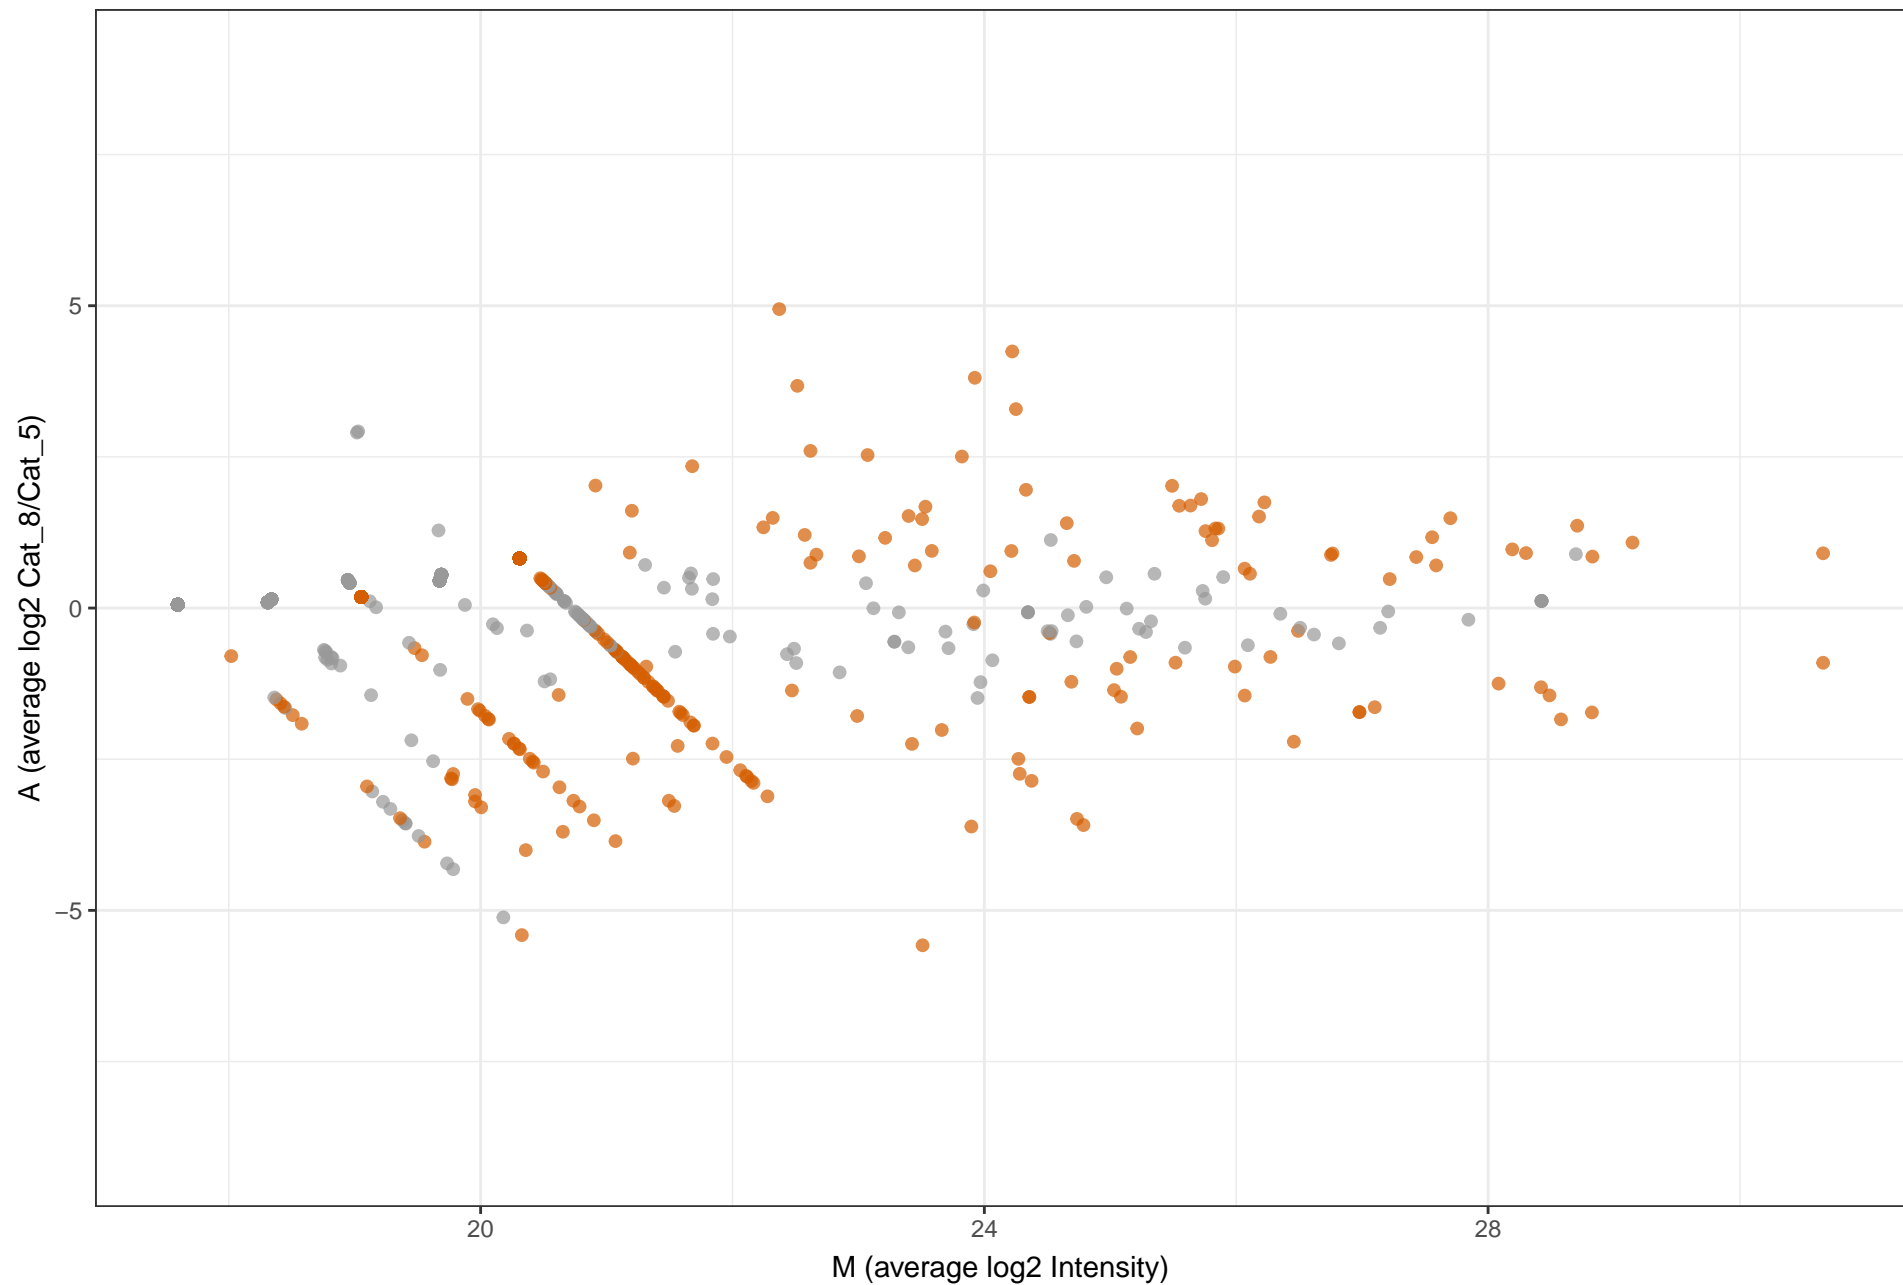

Supplement: supp [file elife-75798-supp-v1.zip]

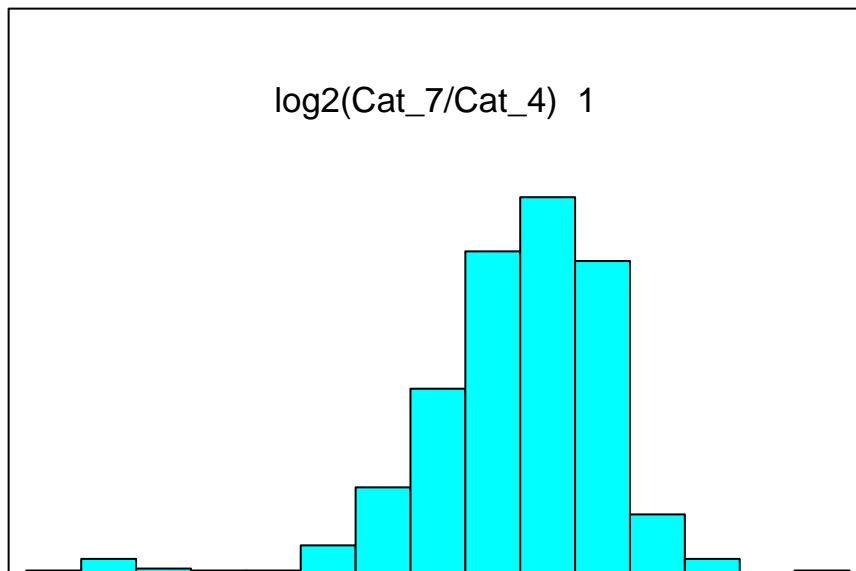

-5 0 5

5  
0  
-5

0.84

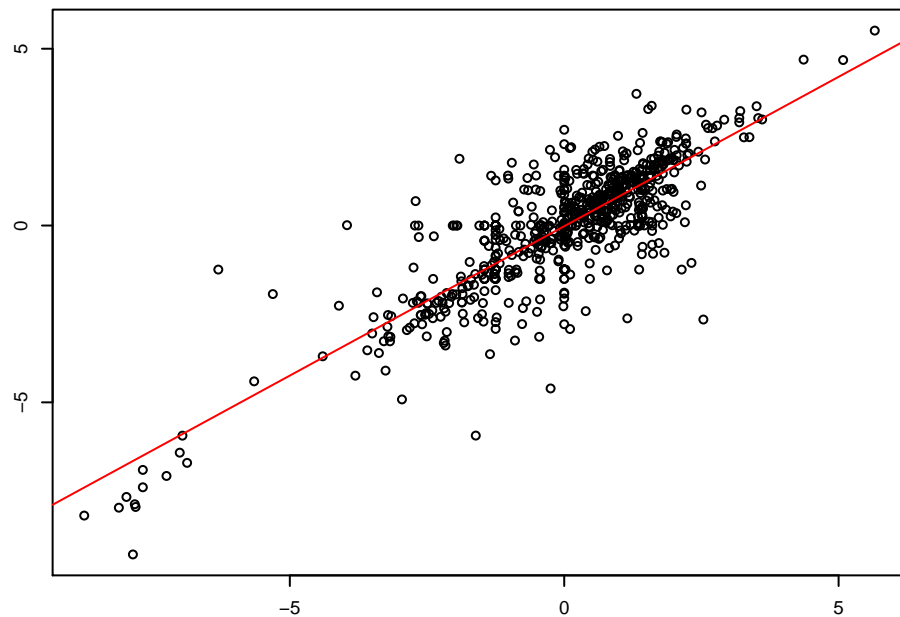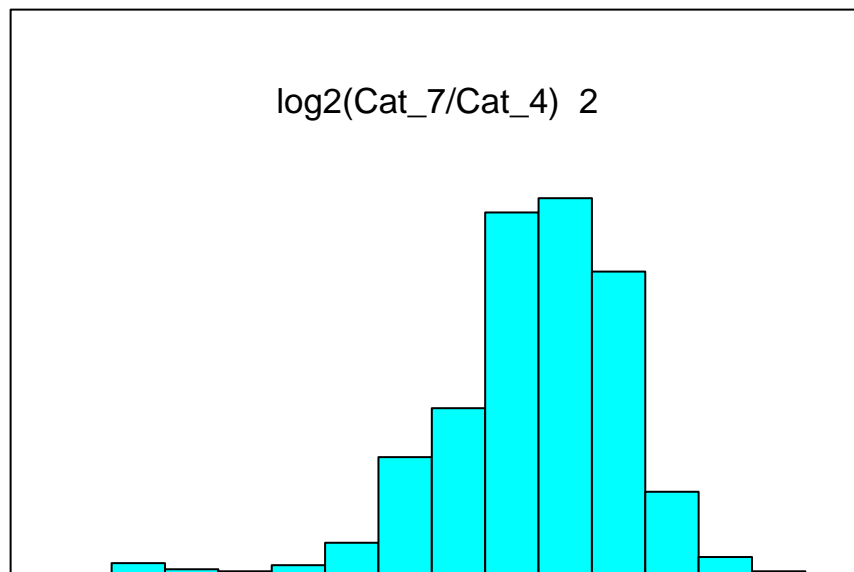

Supplement: supp [file elife-75798-supp-v1.zip]

P-value vs Fold change

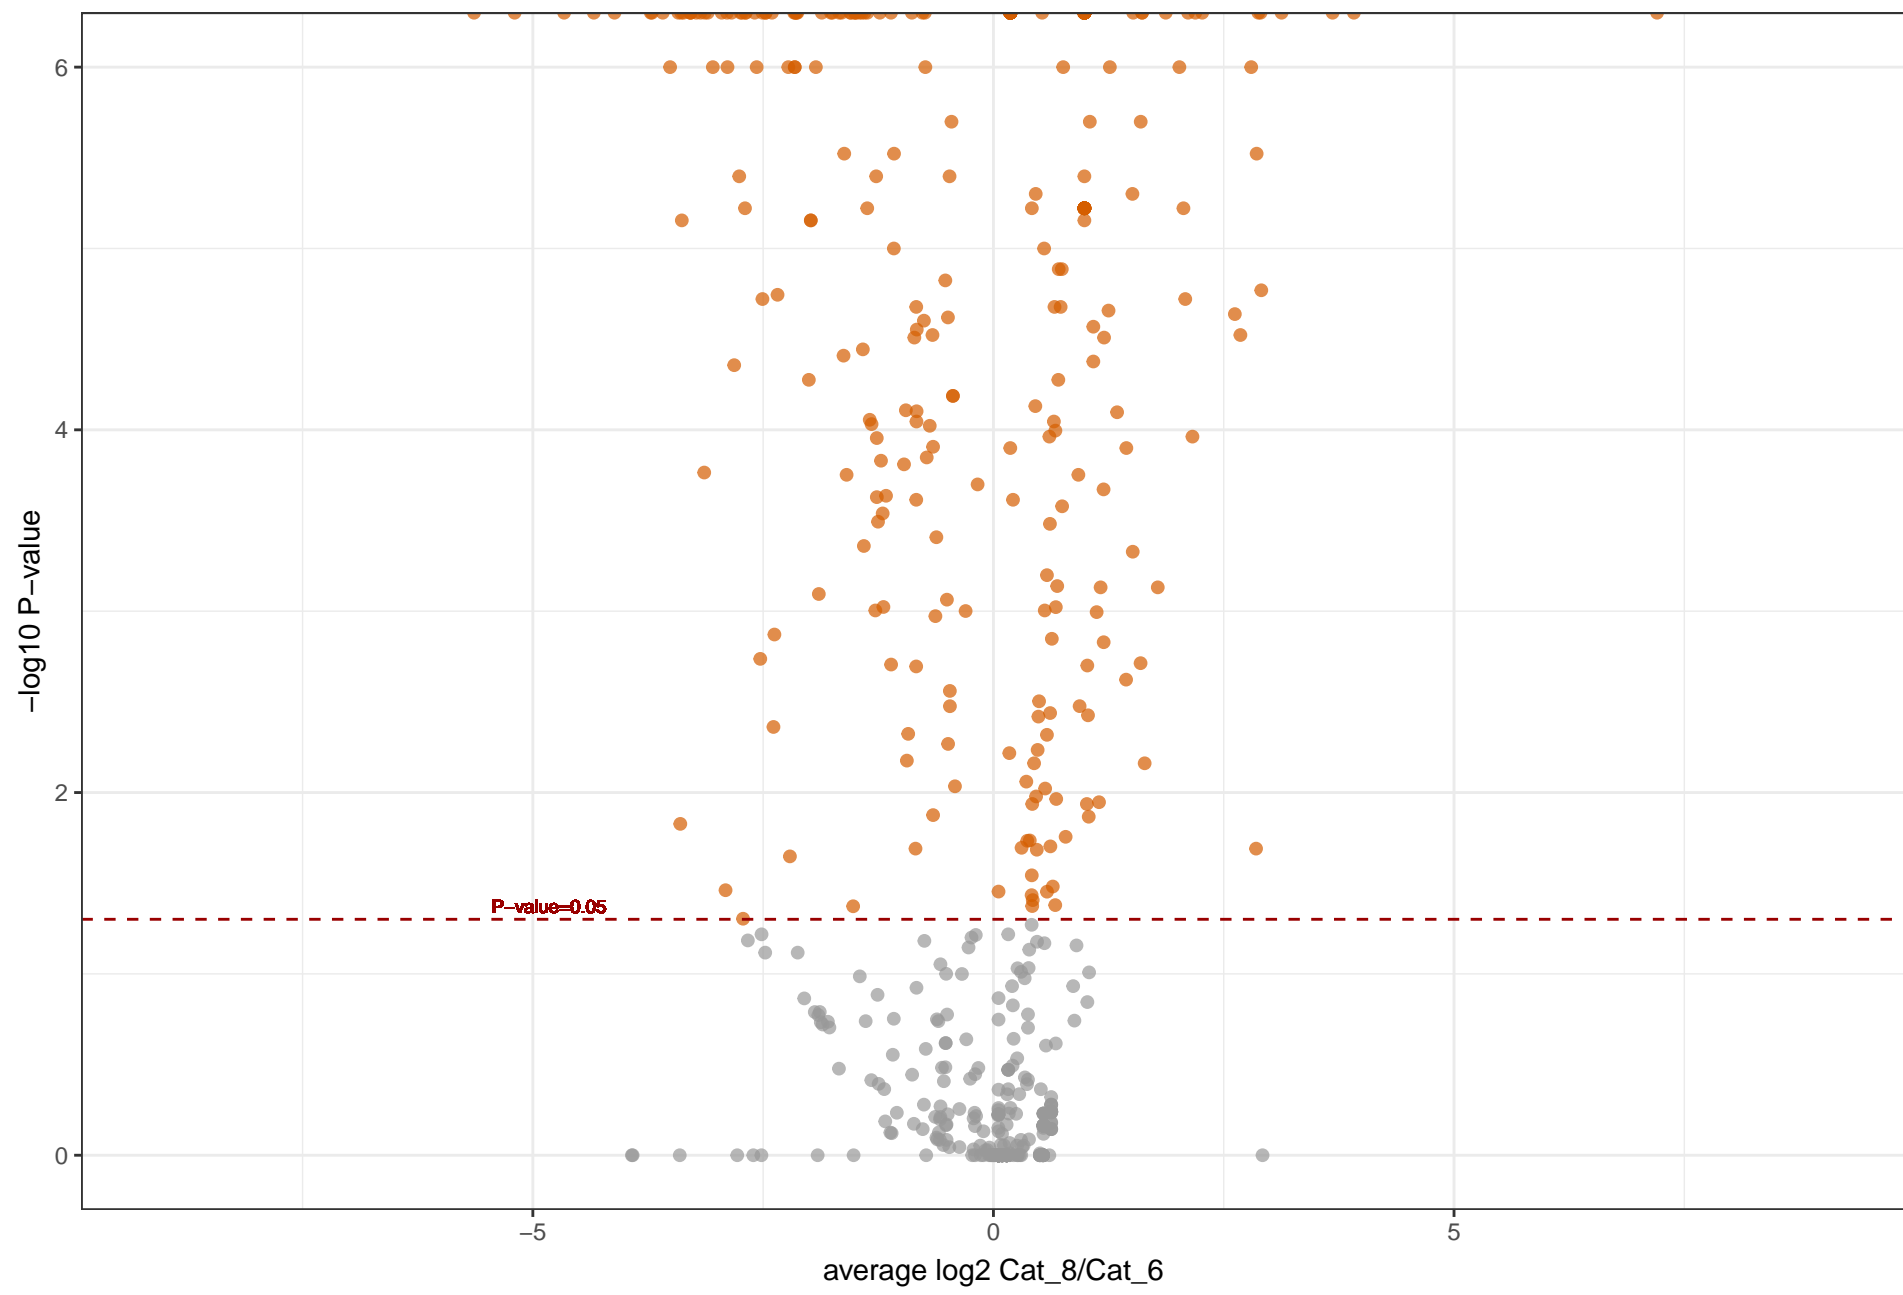

Supplement: supp [file elife-75798-supp-v1.zip]

**P-value vs Fold change**

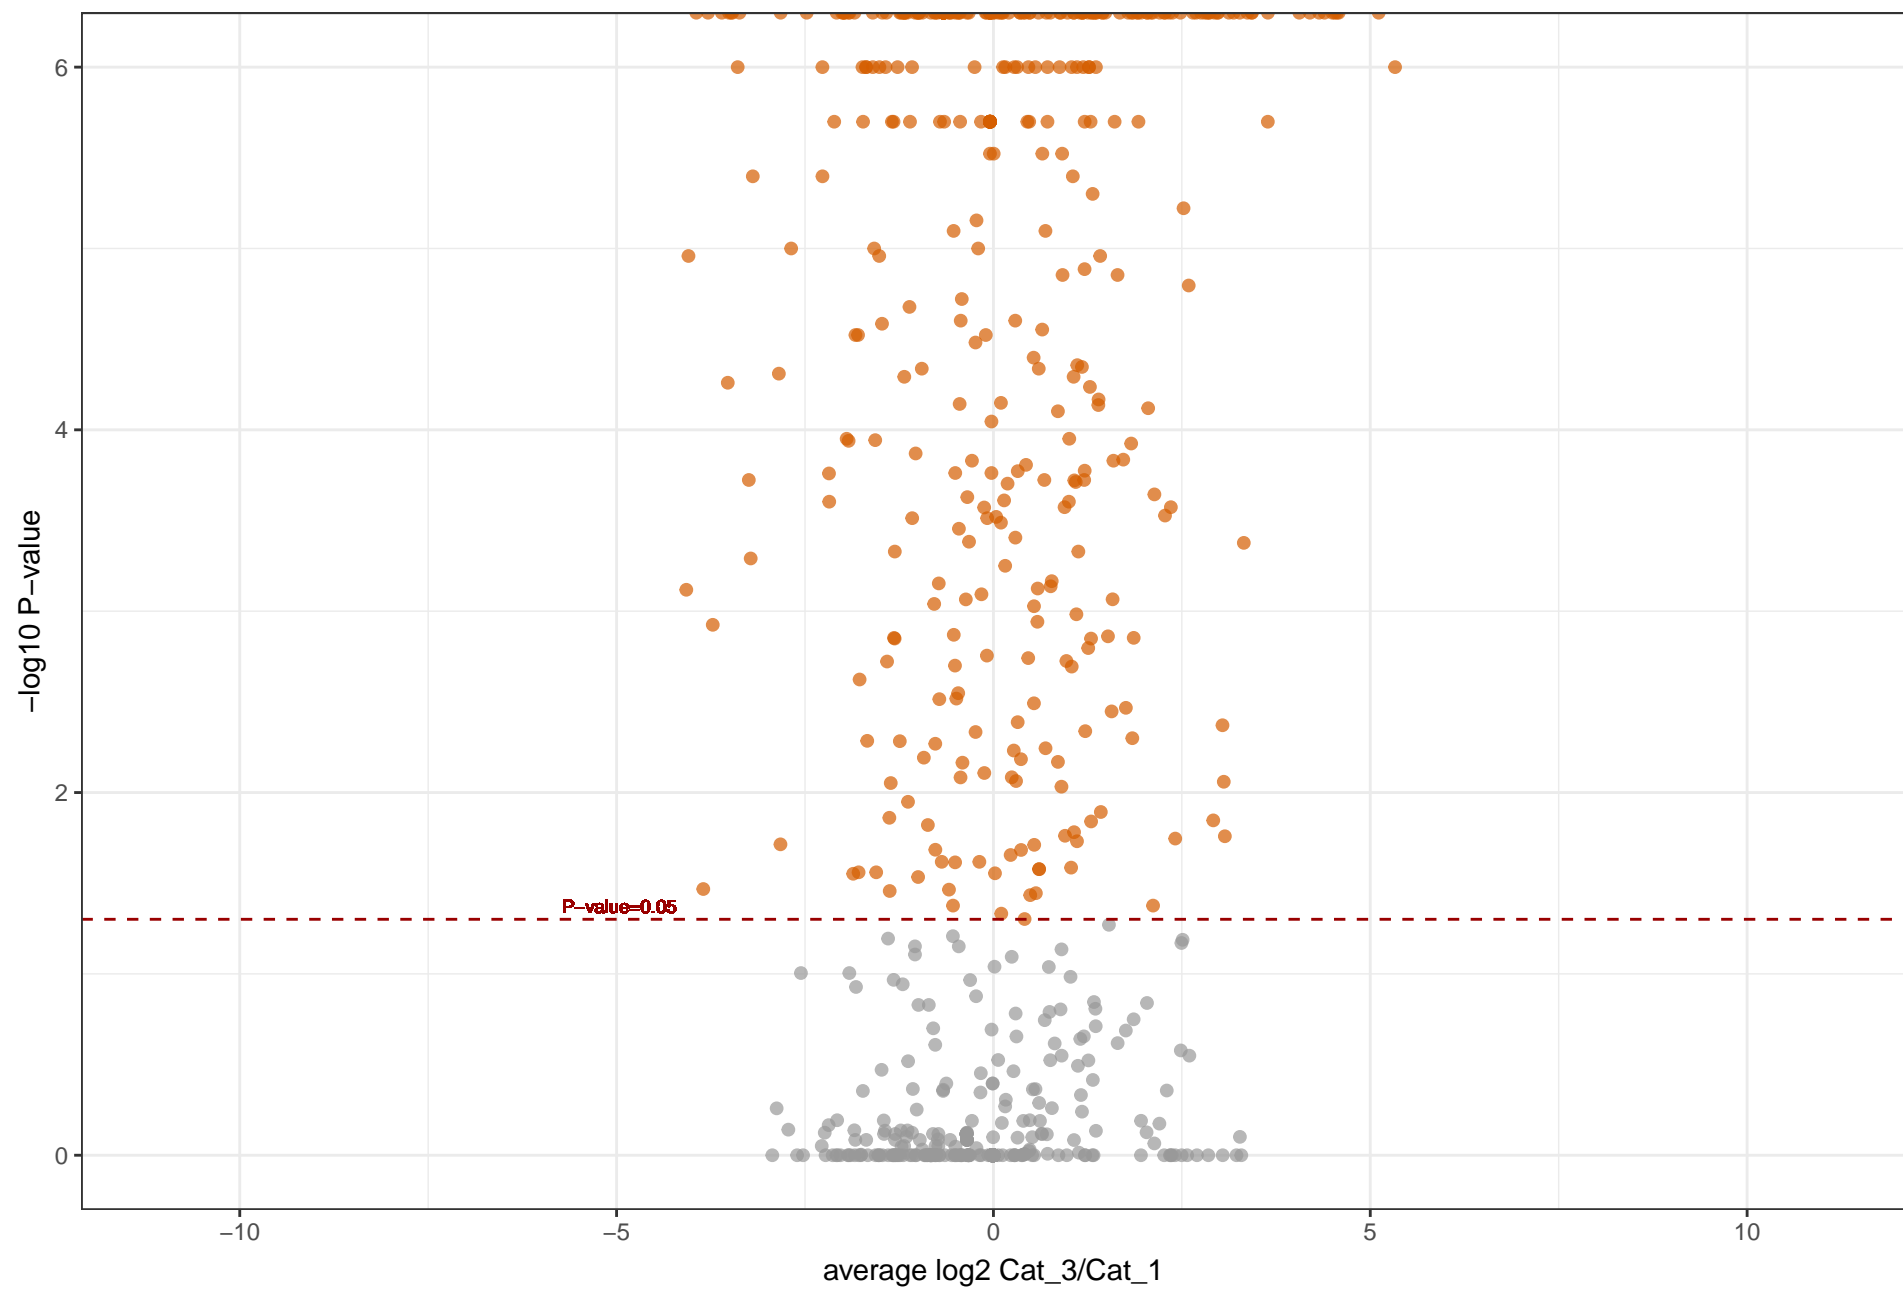

Supplement: supp [file elife-75798-supp-v1.zip]

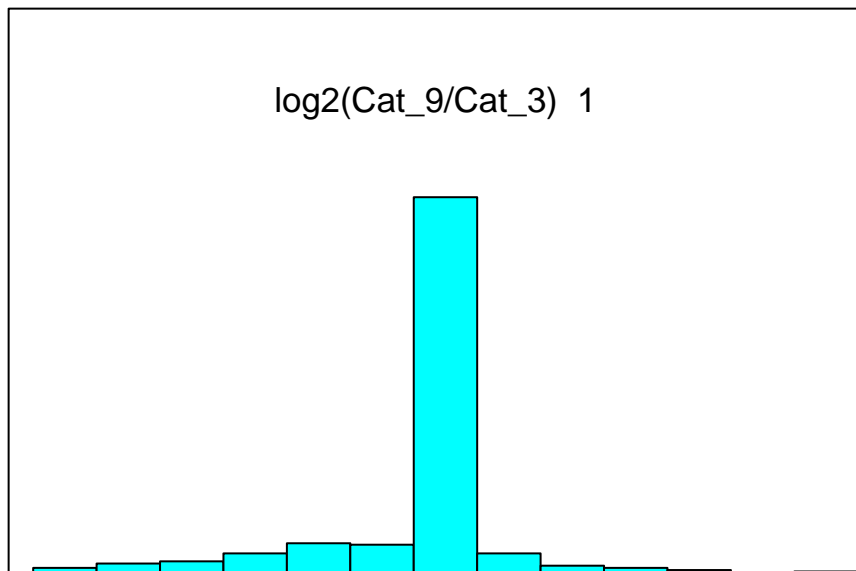

0.72

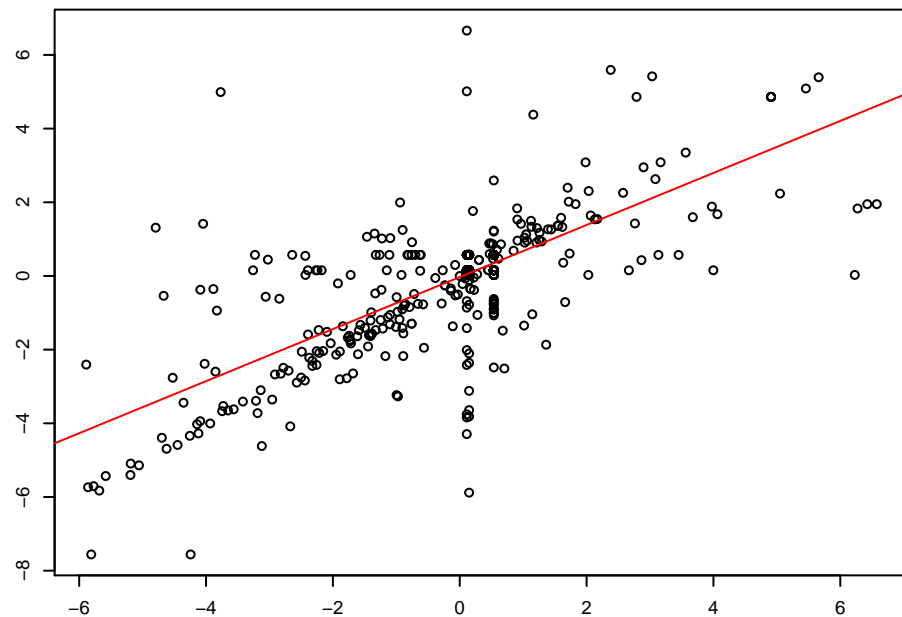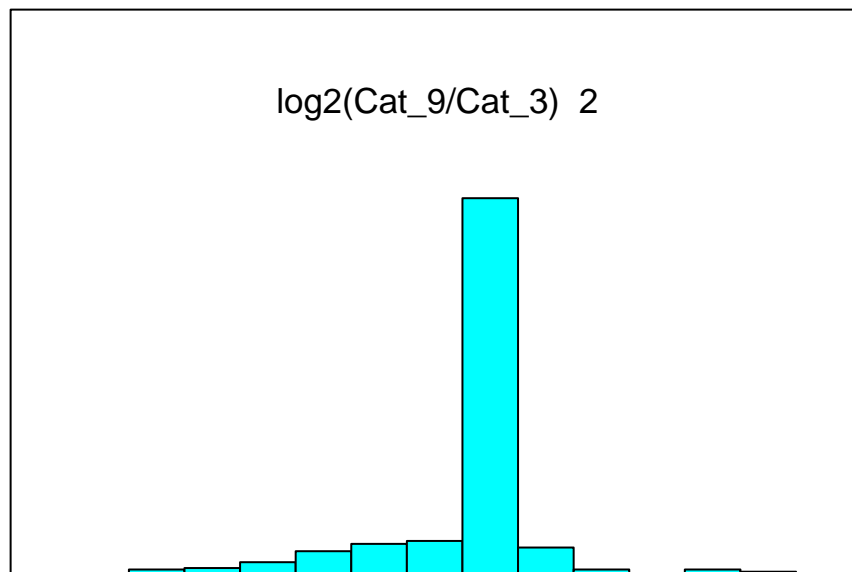

Supplement: supp [file elife-75798-supp-v1.zip]

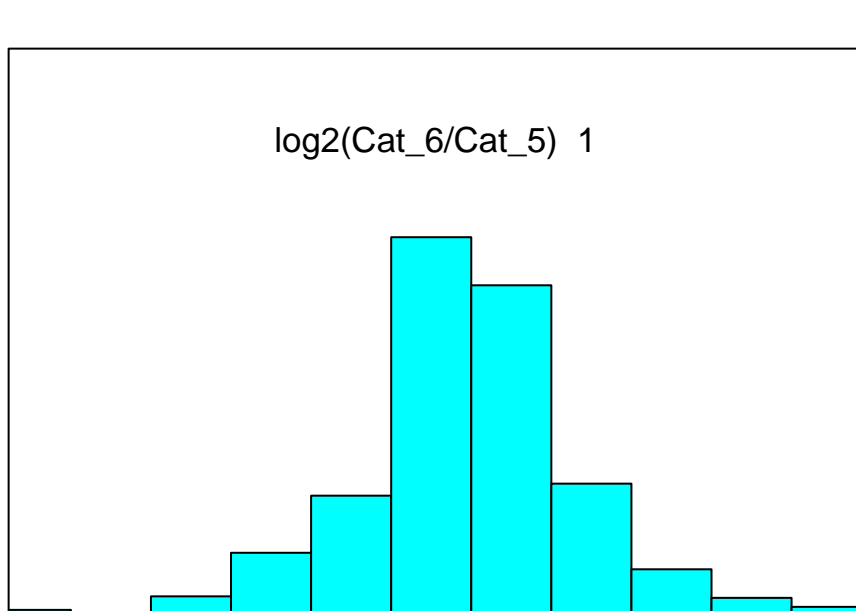

0.70

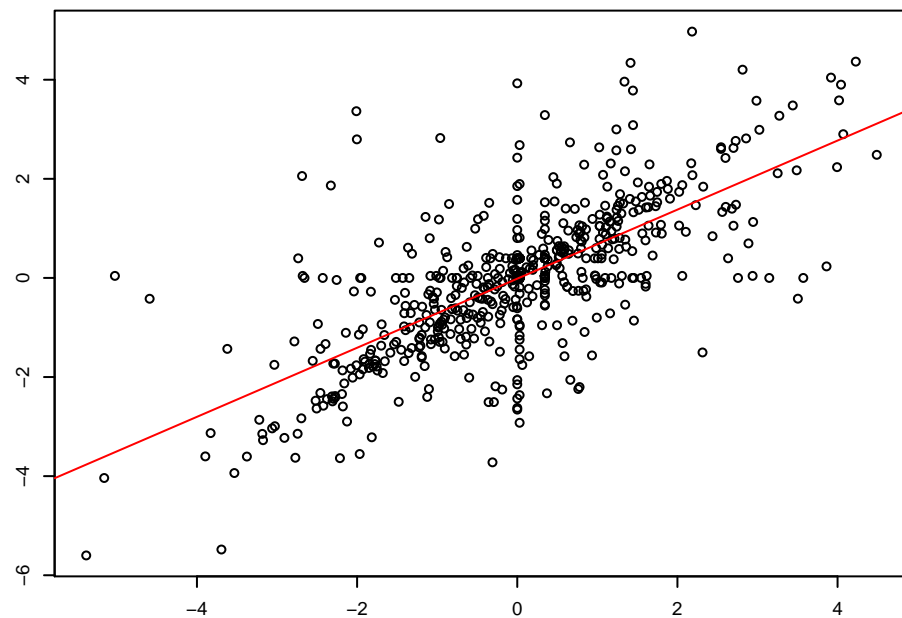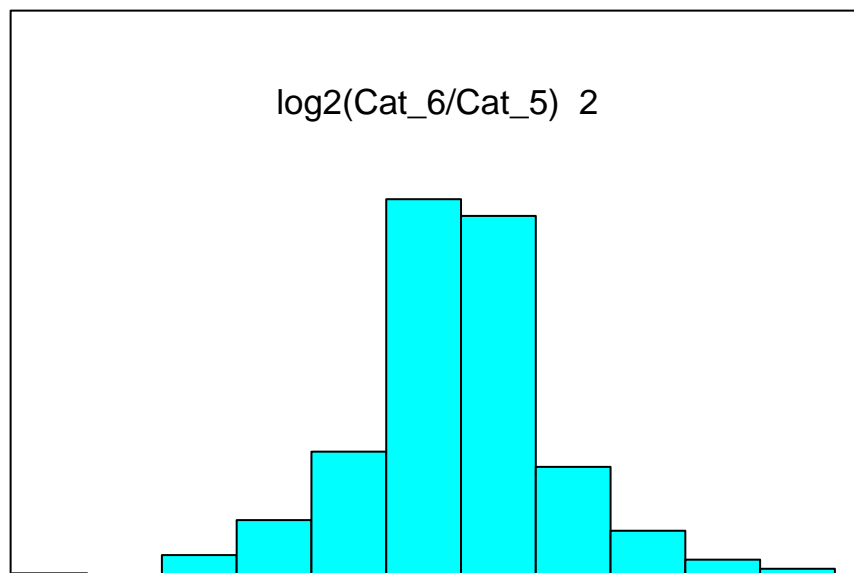

Supplement: supp [file elife-75798-supp-v1.zip]

MA plot

A (average log2 Cat\_10/Cat\_8)

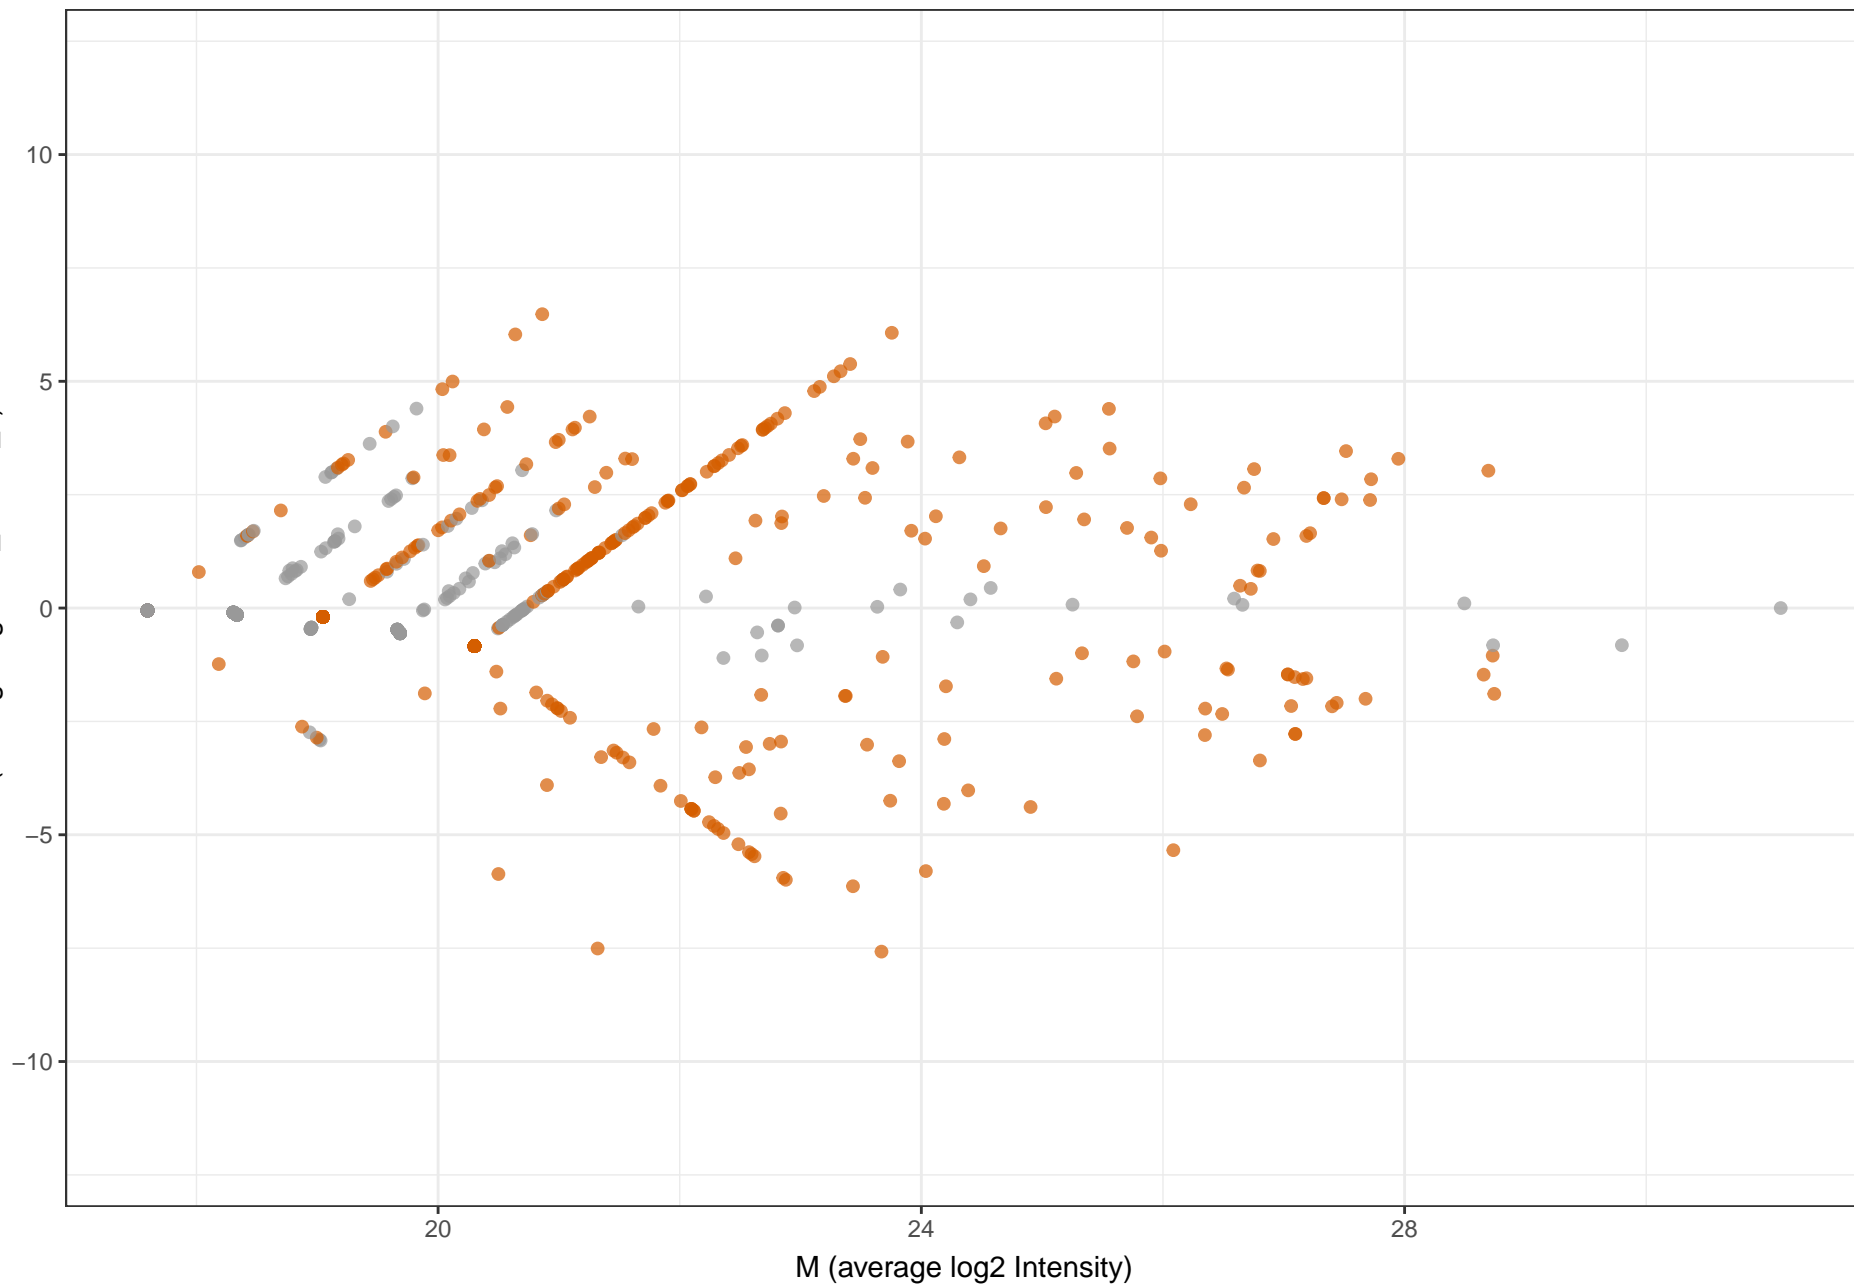

Supplement: supp [file elife-75798-supp-v1.zip]

Value-ordered fold change

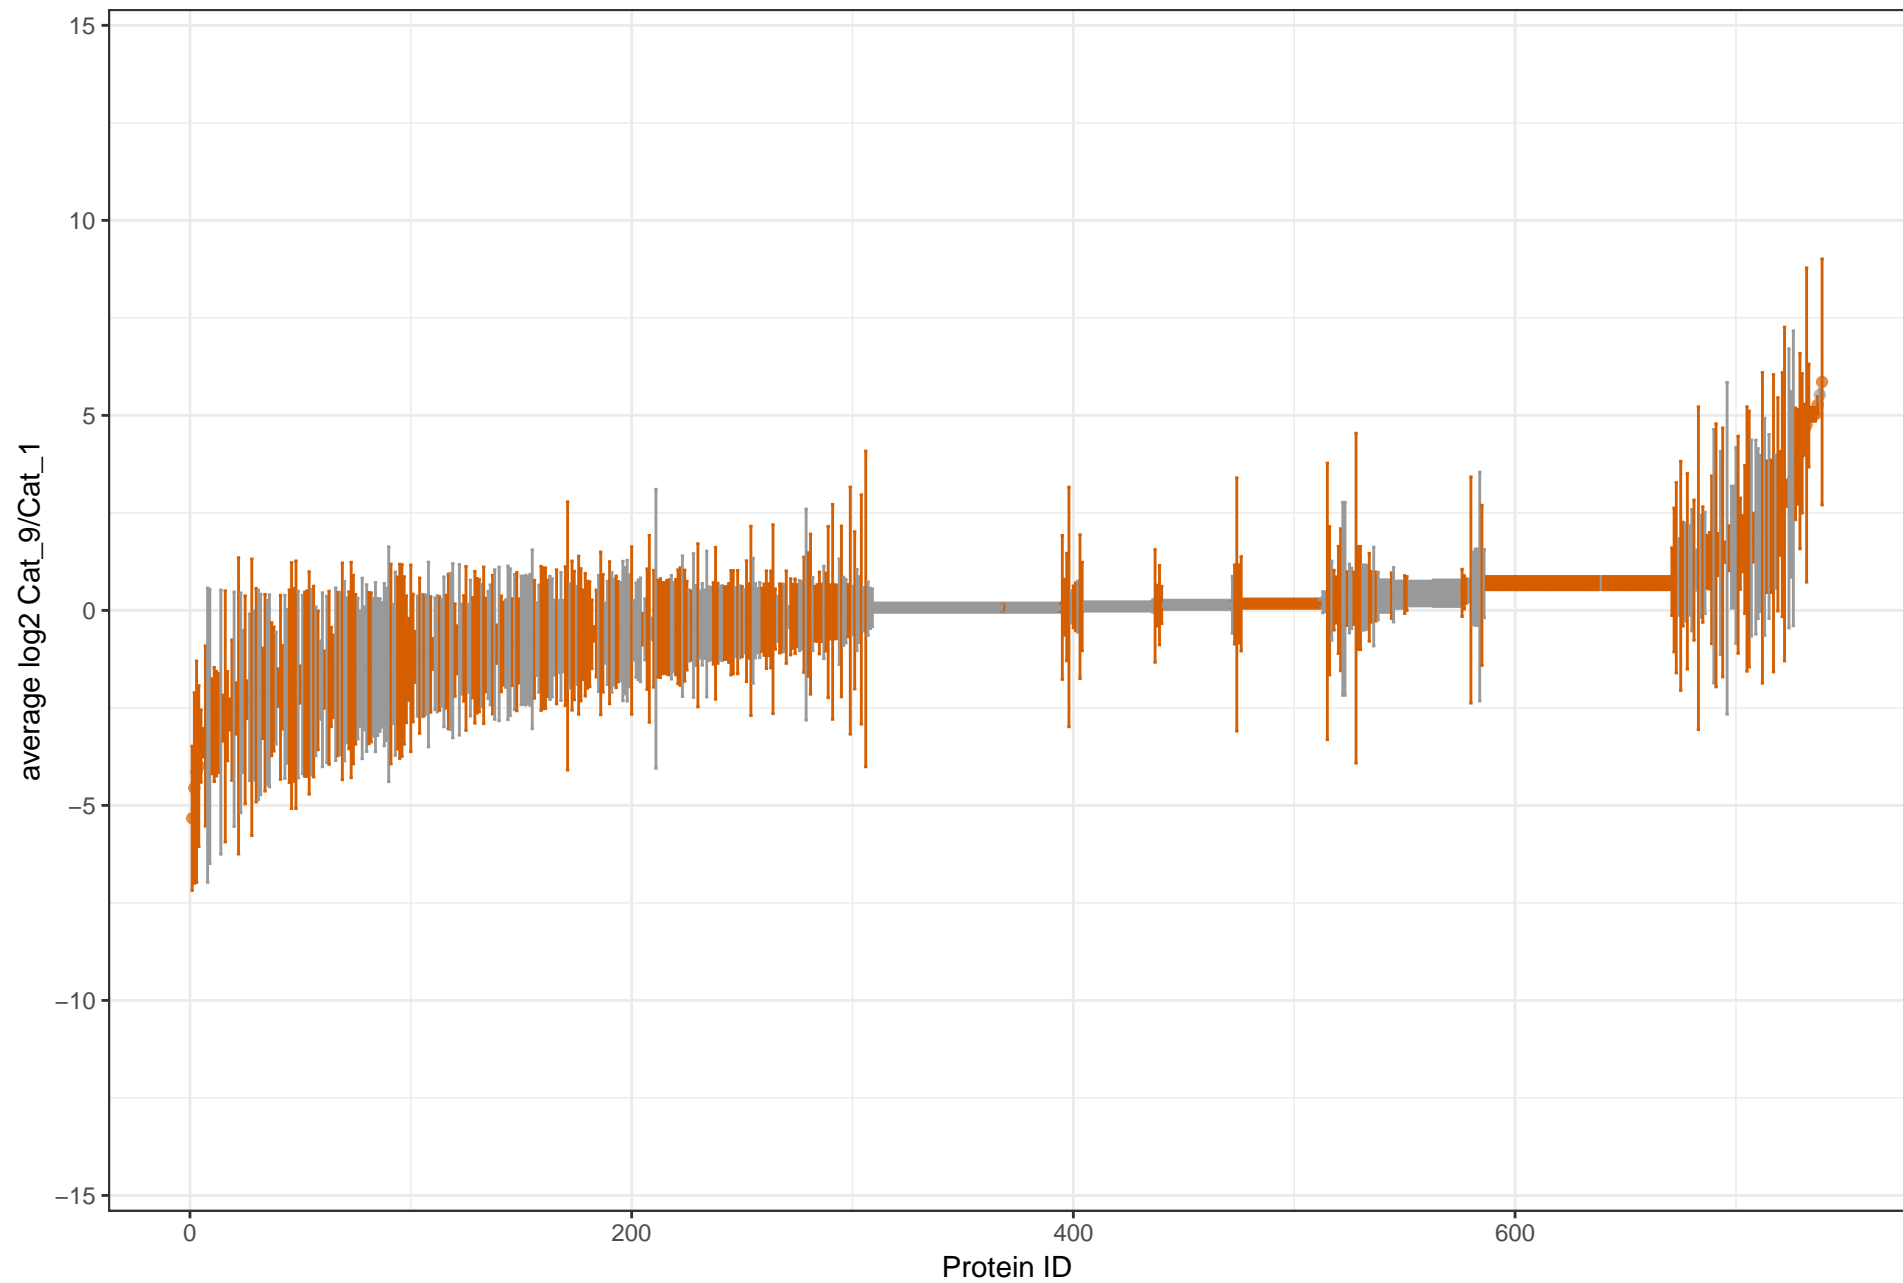

Supplement: supp [file elife-75798-supp-v1.zip]

**P-value vs Fold change**

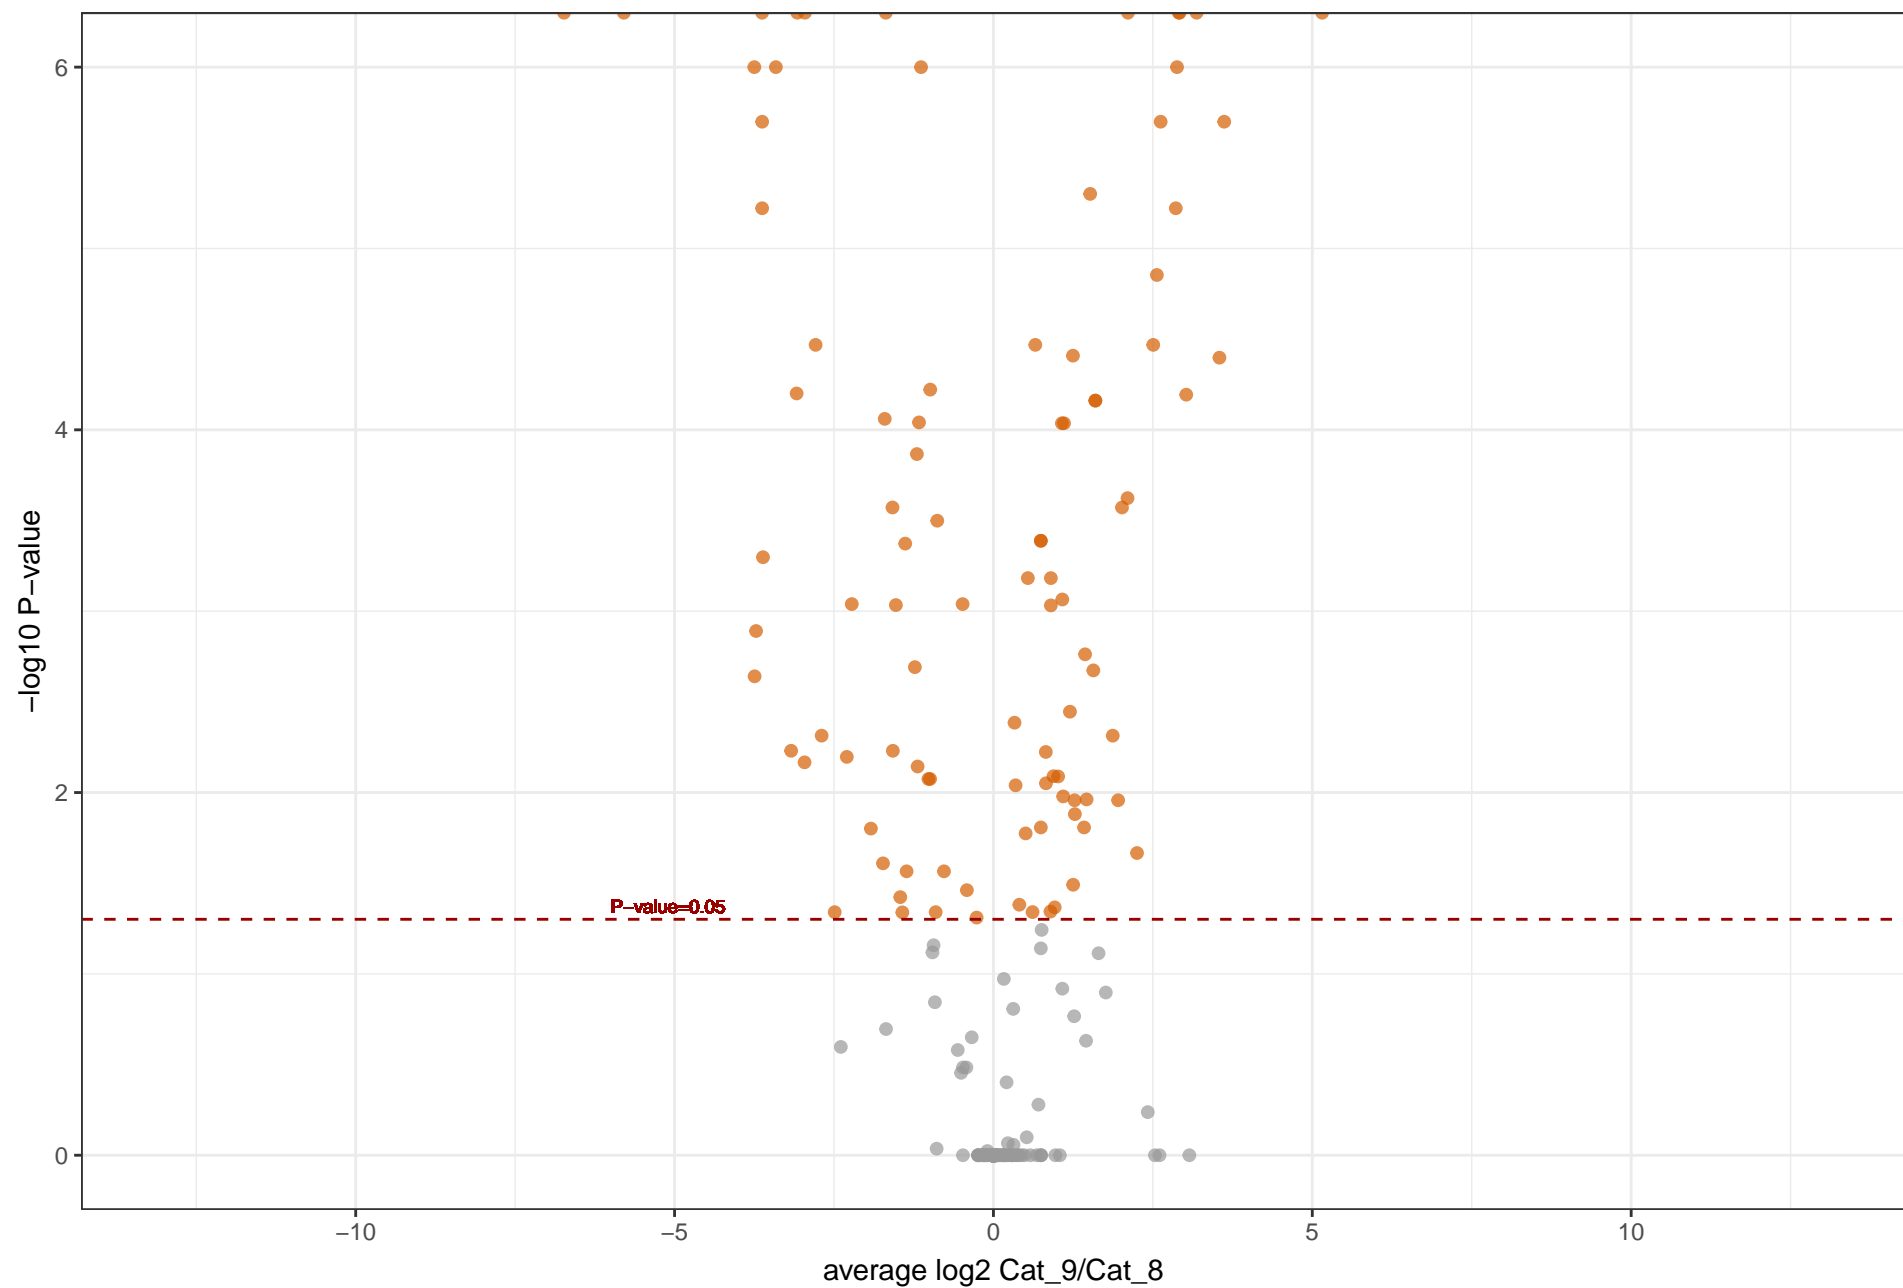

Supplement: supp [file elife-75798-supp-v1.zip]

MA plot

A (average log2 Cat\_10/Cat\_6)

10  
5  
0  
-5  
-10

M (average log2 Intensity)

20

24

28

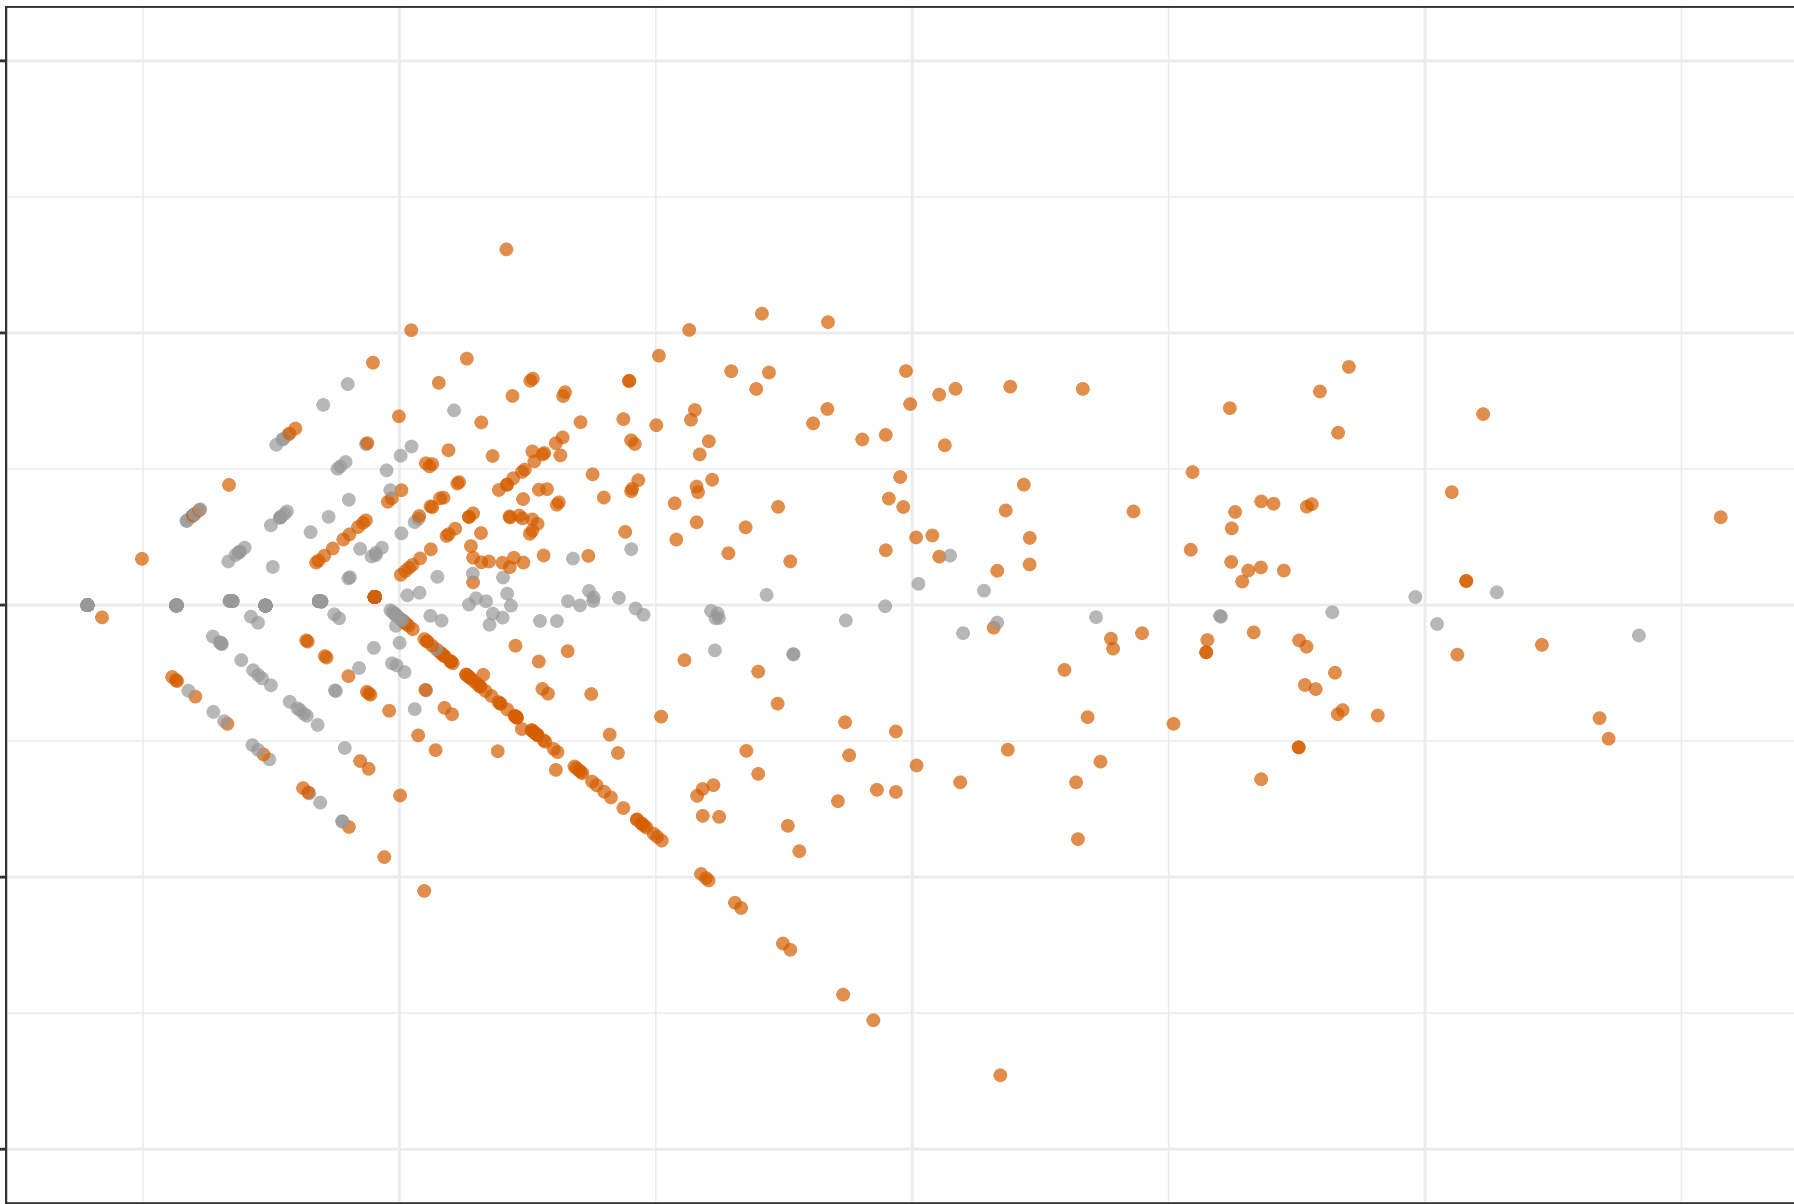

Supplement: supp [file elife-75798-supp-v1.zip]

Value-ordered fold change

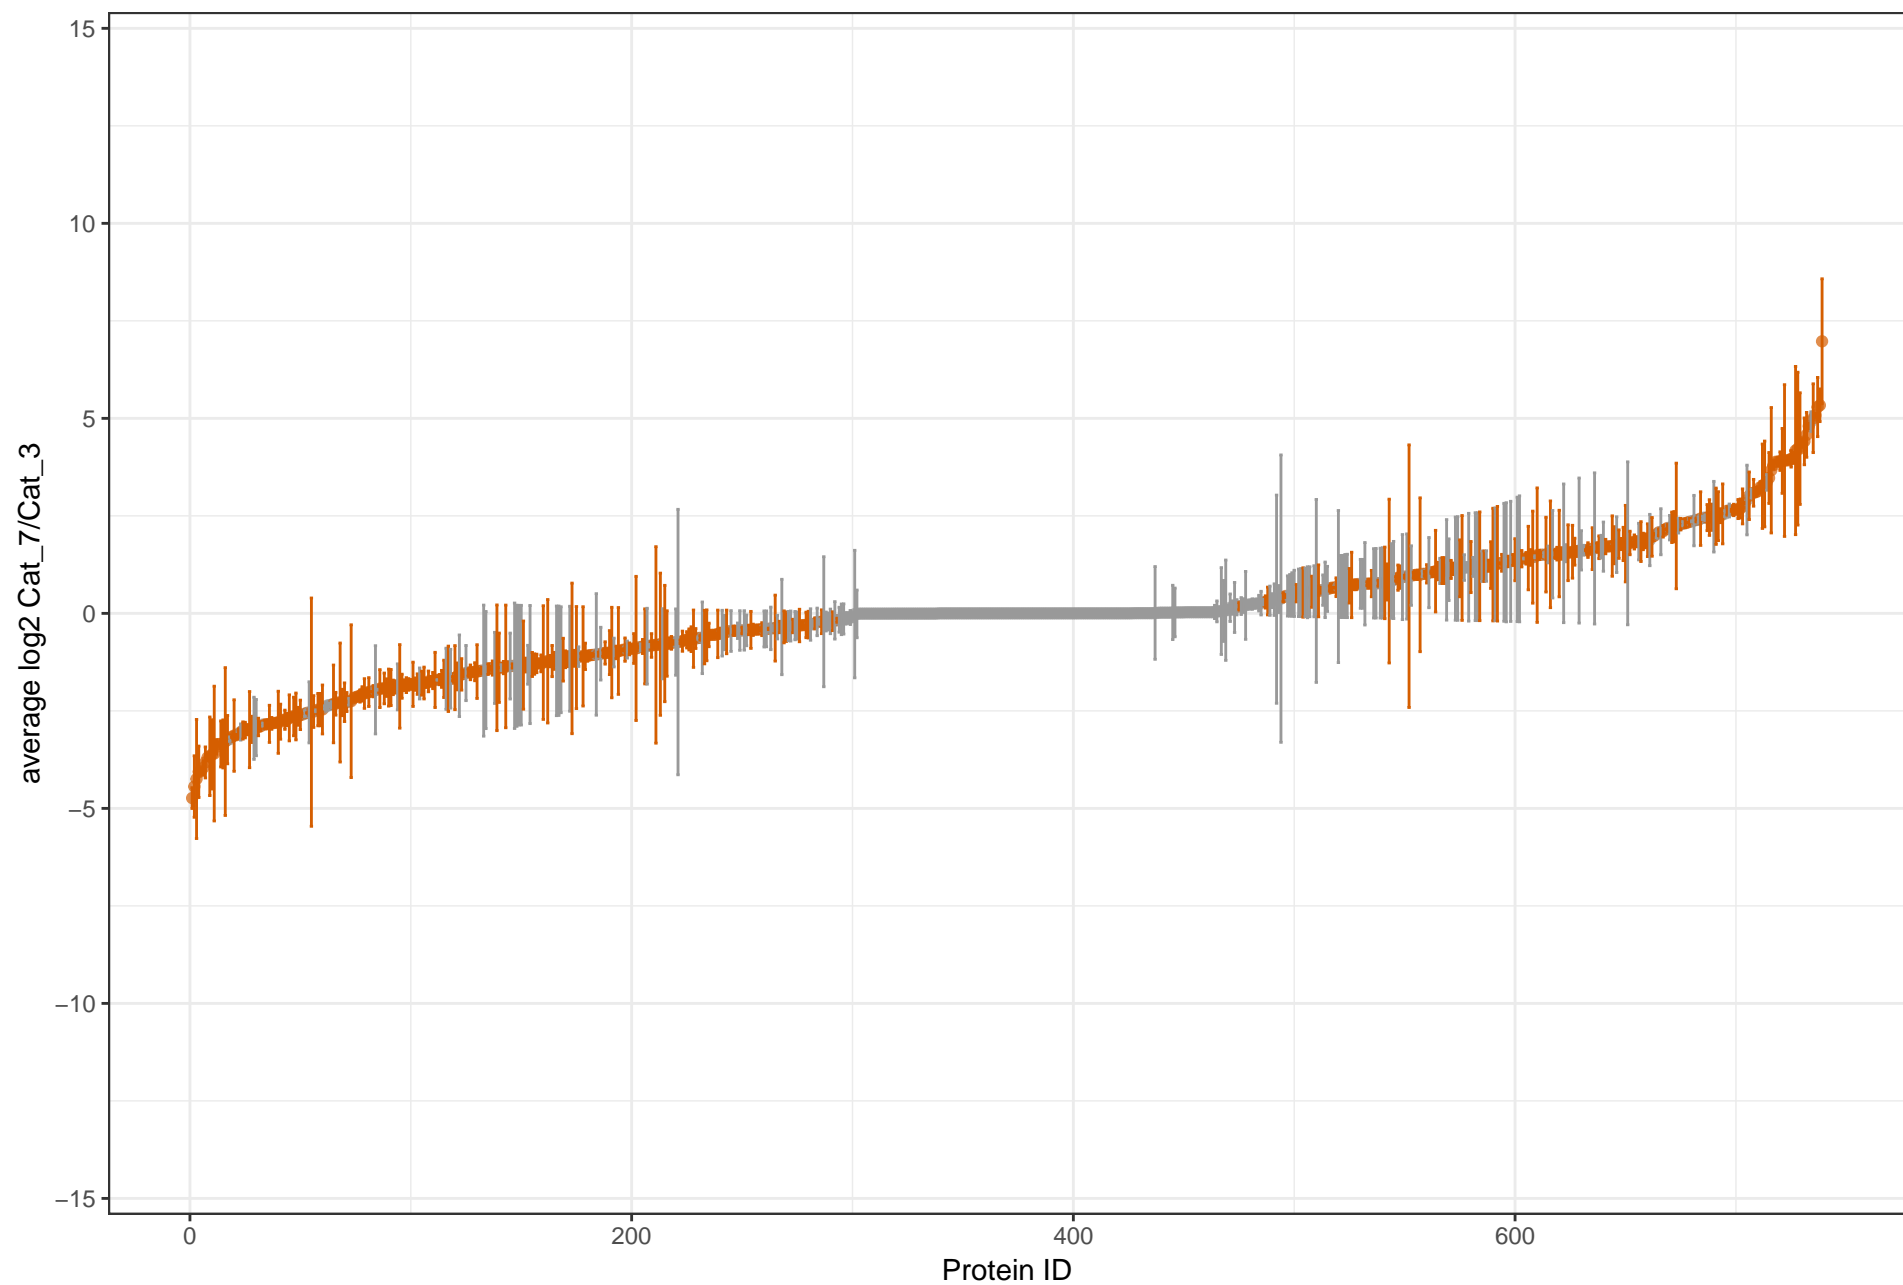

Supplement: supp [file elife-75798-supp-v1.zip]

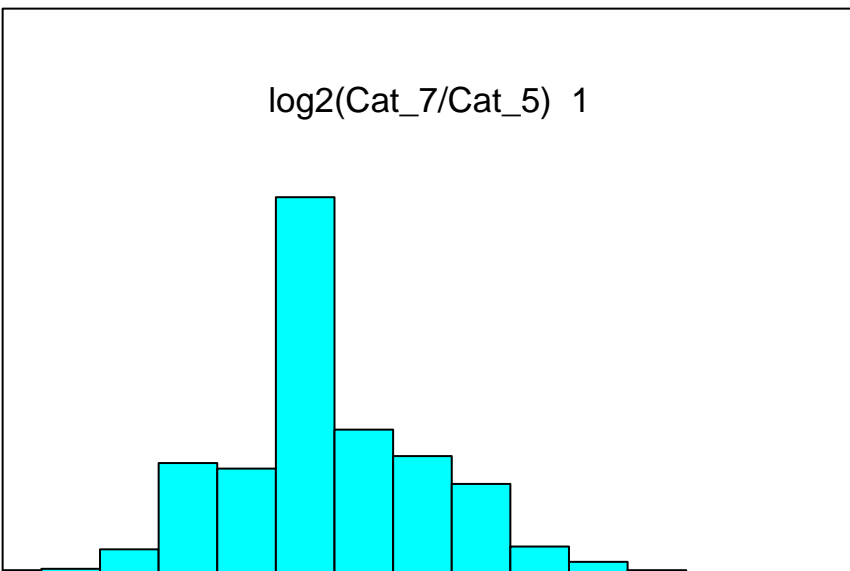

0.79

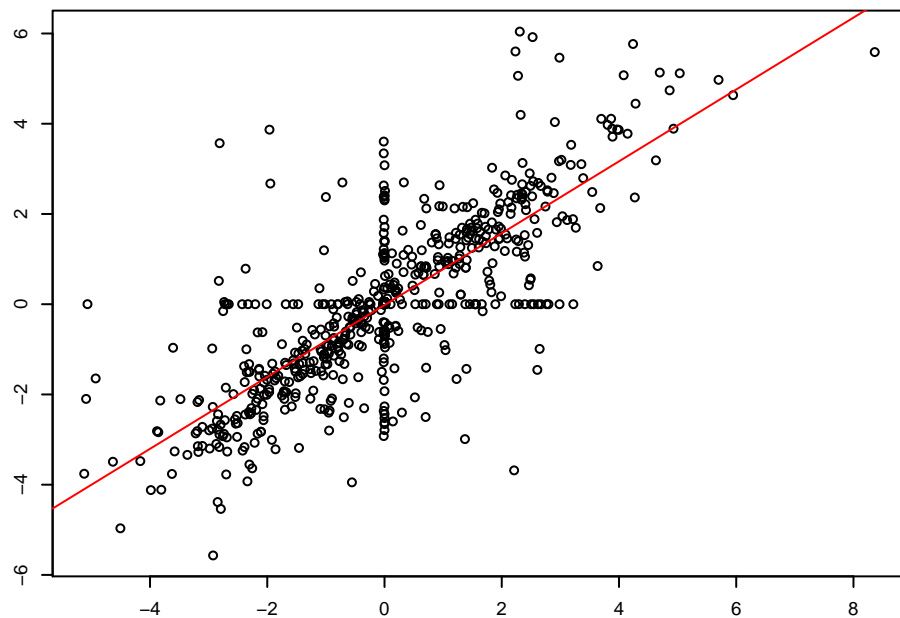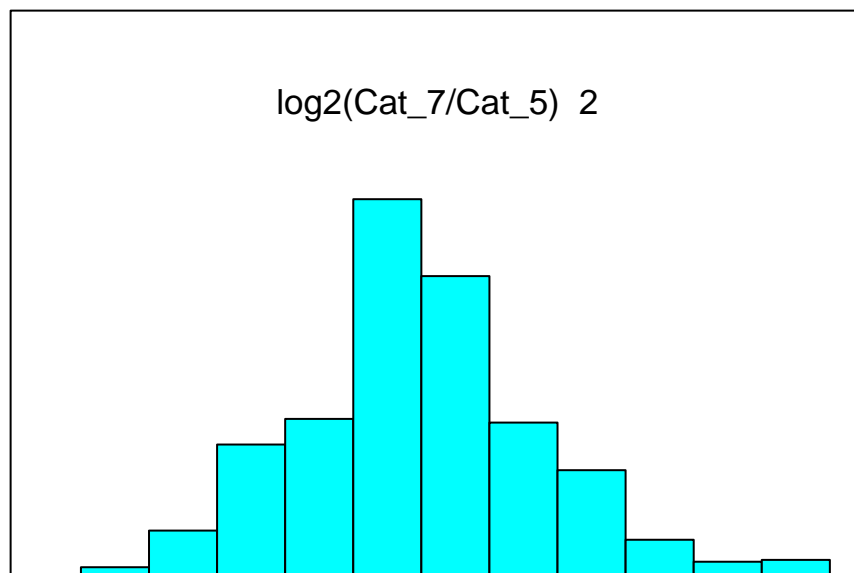

Supplement: supp [file elife-75798-supp-v1.zip]

MA plot

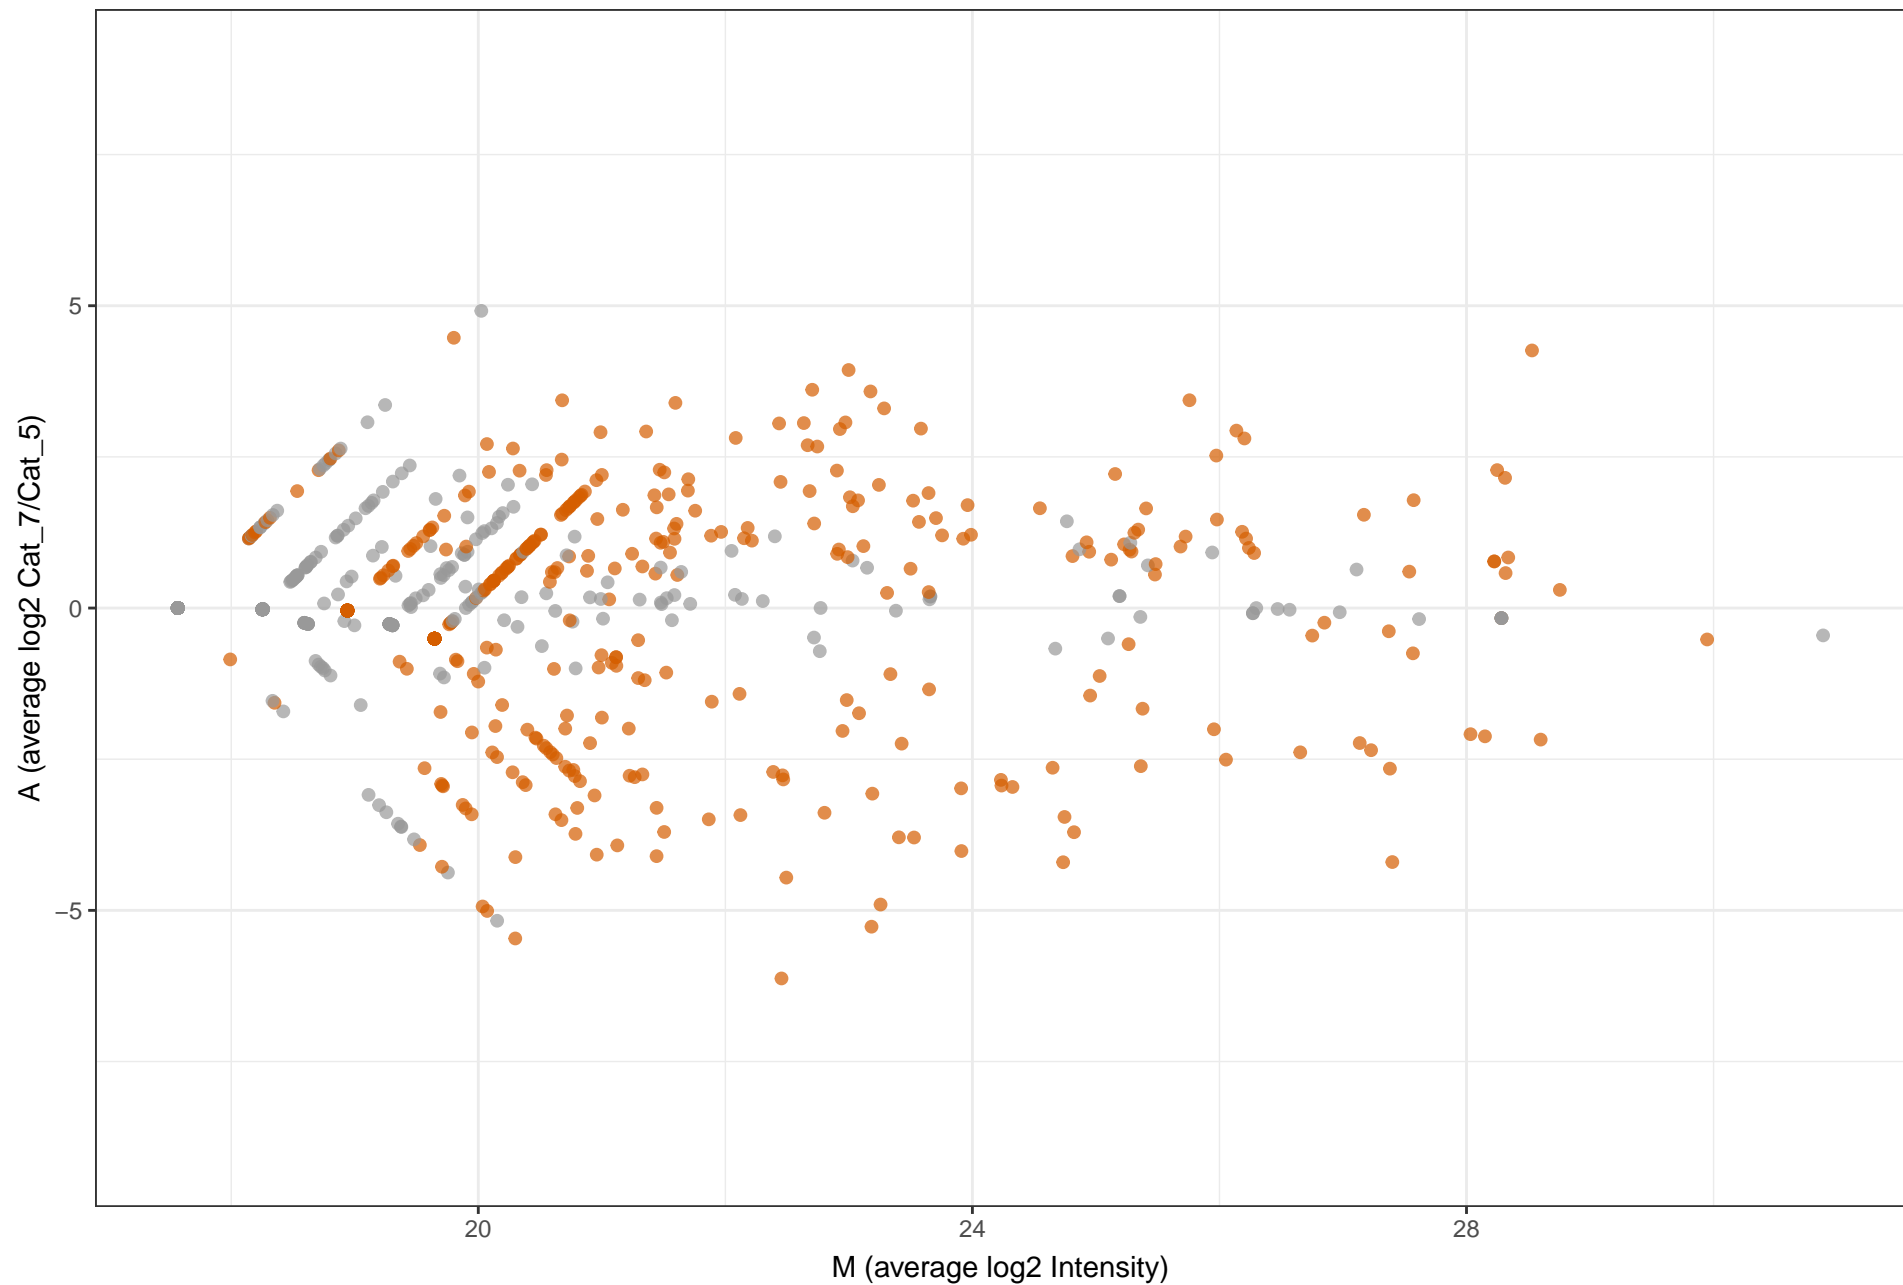

Supplement: supp [file elife-75798-supp-v1.zip]

Value-ordered fold change

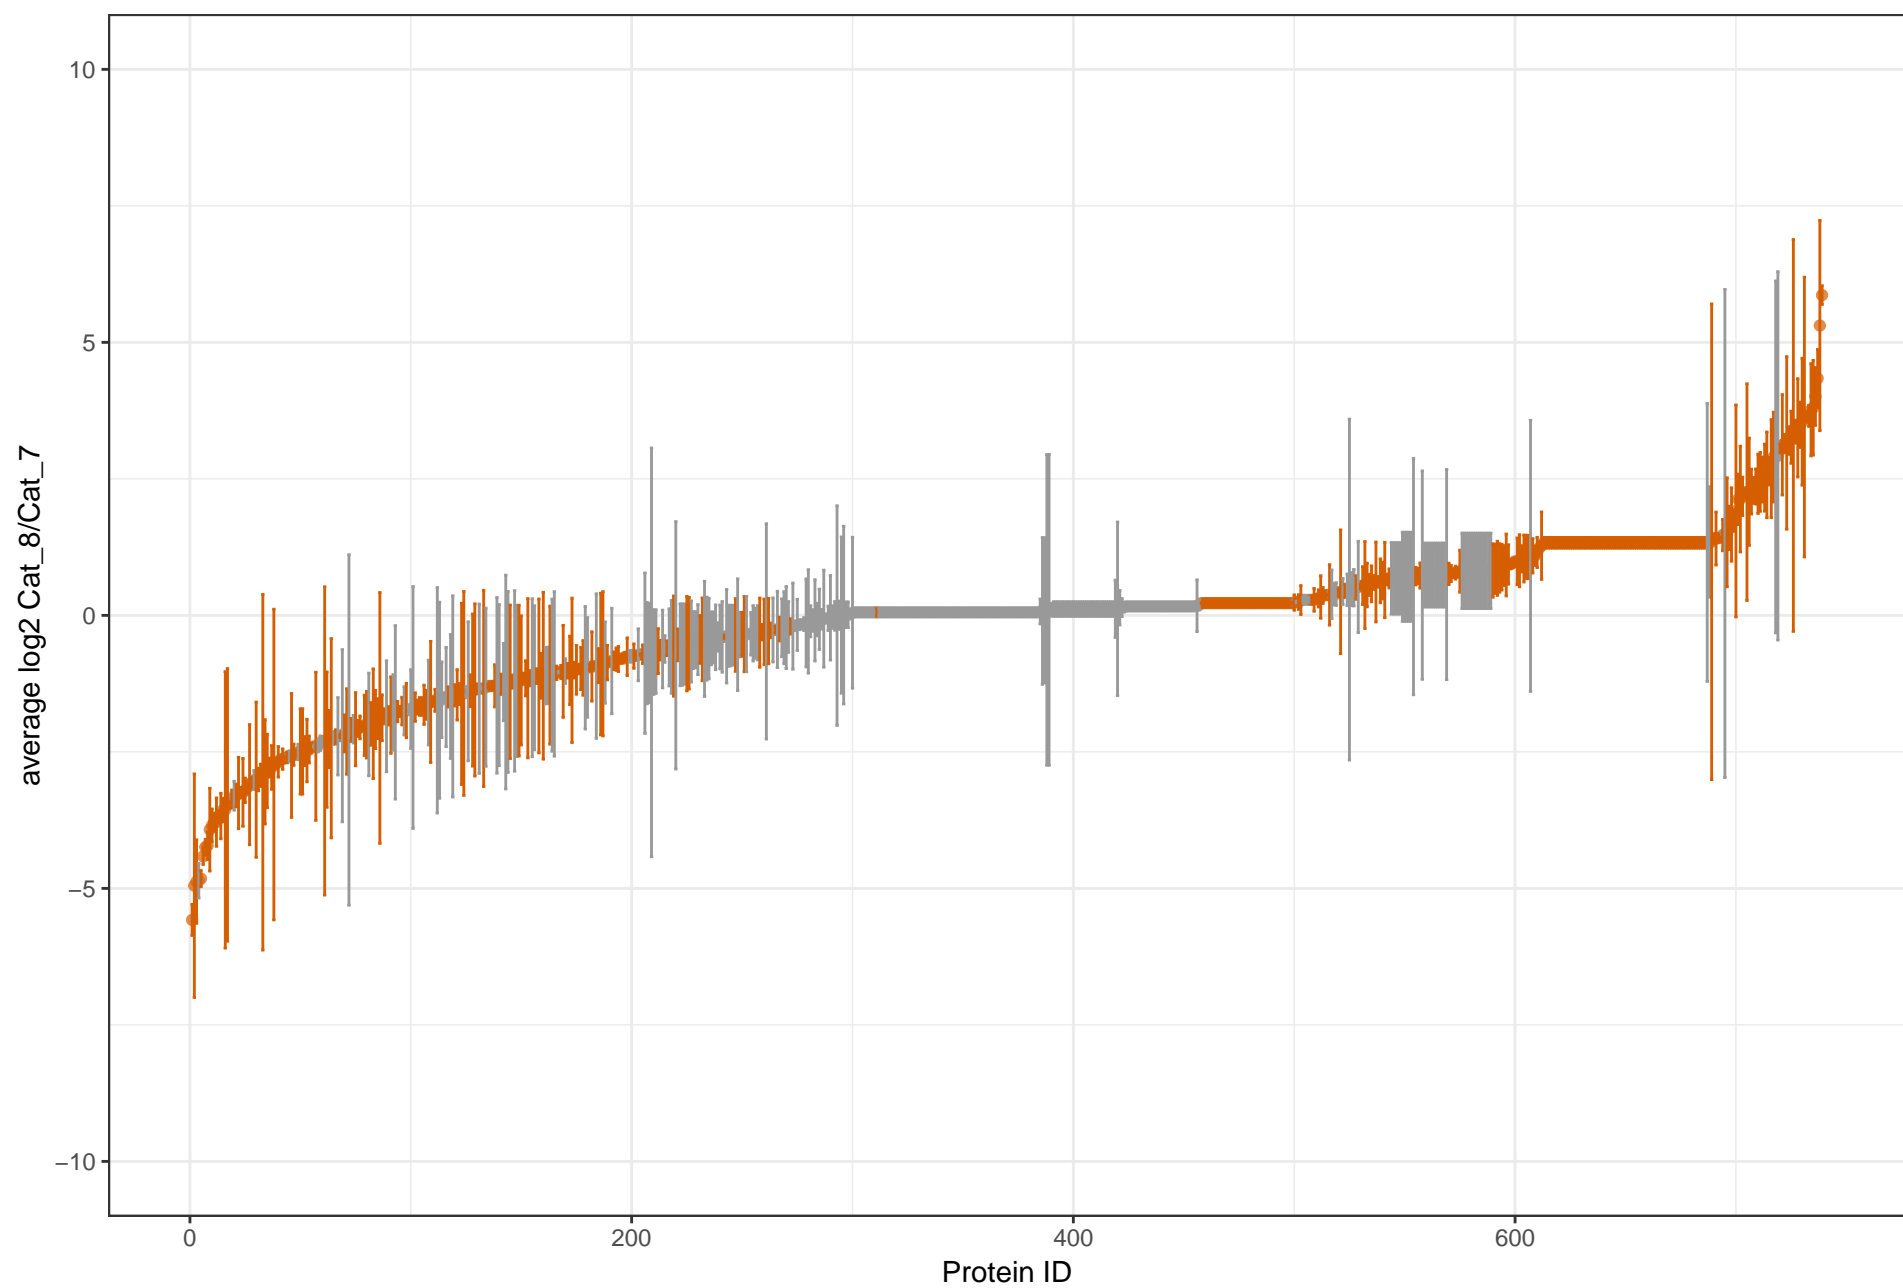

Supplement: supp [file elife-75798-supp-v1.zip]

Value-ordered fold change

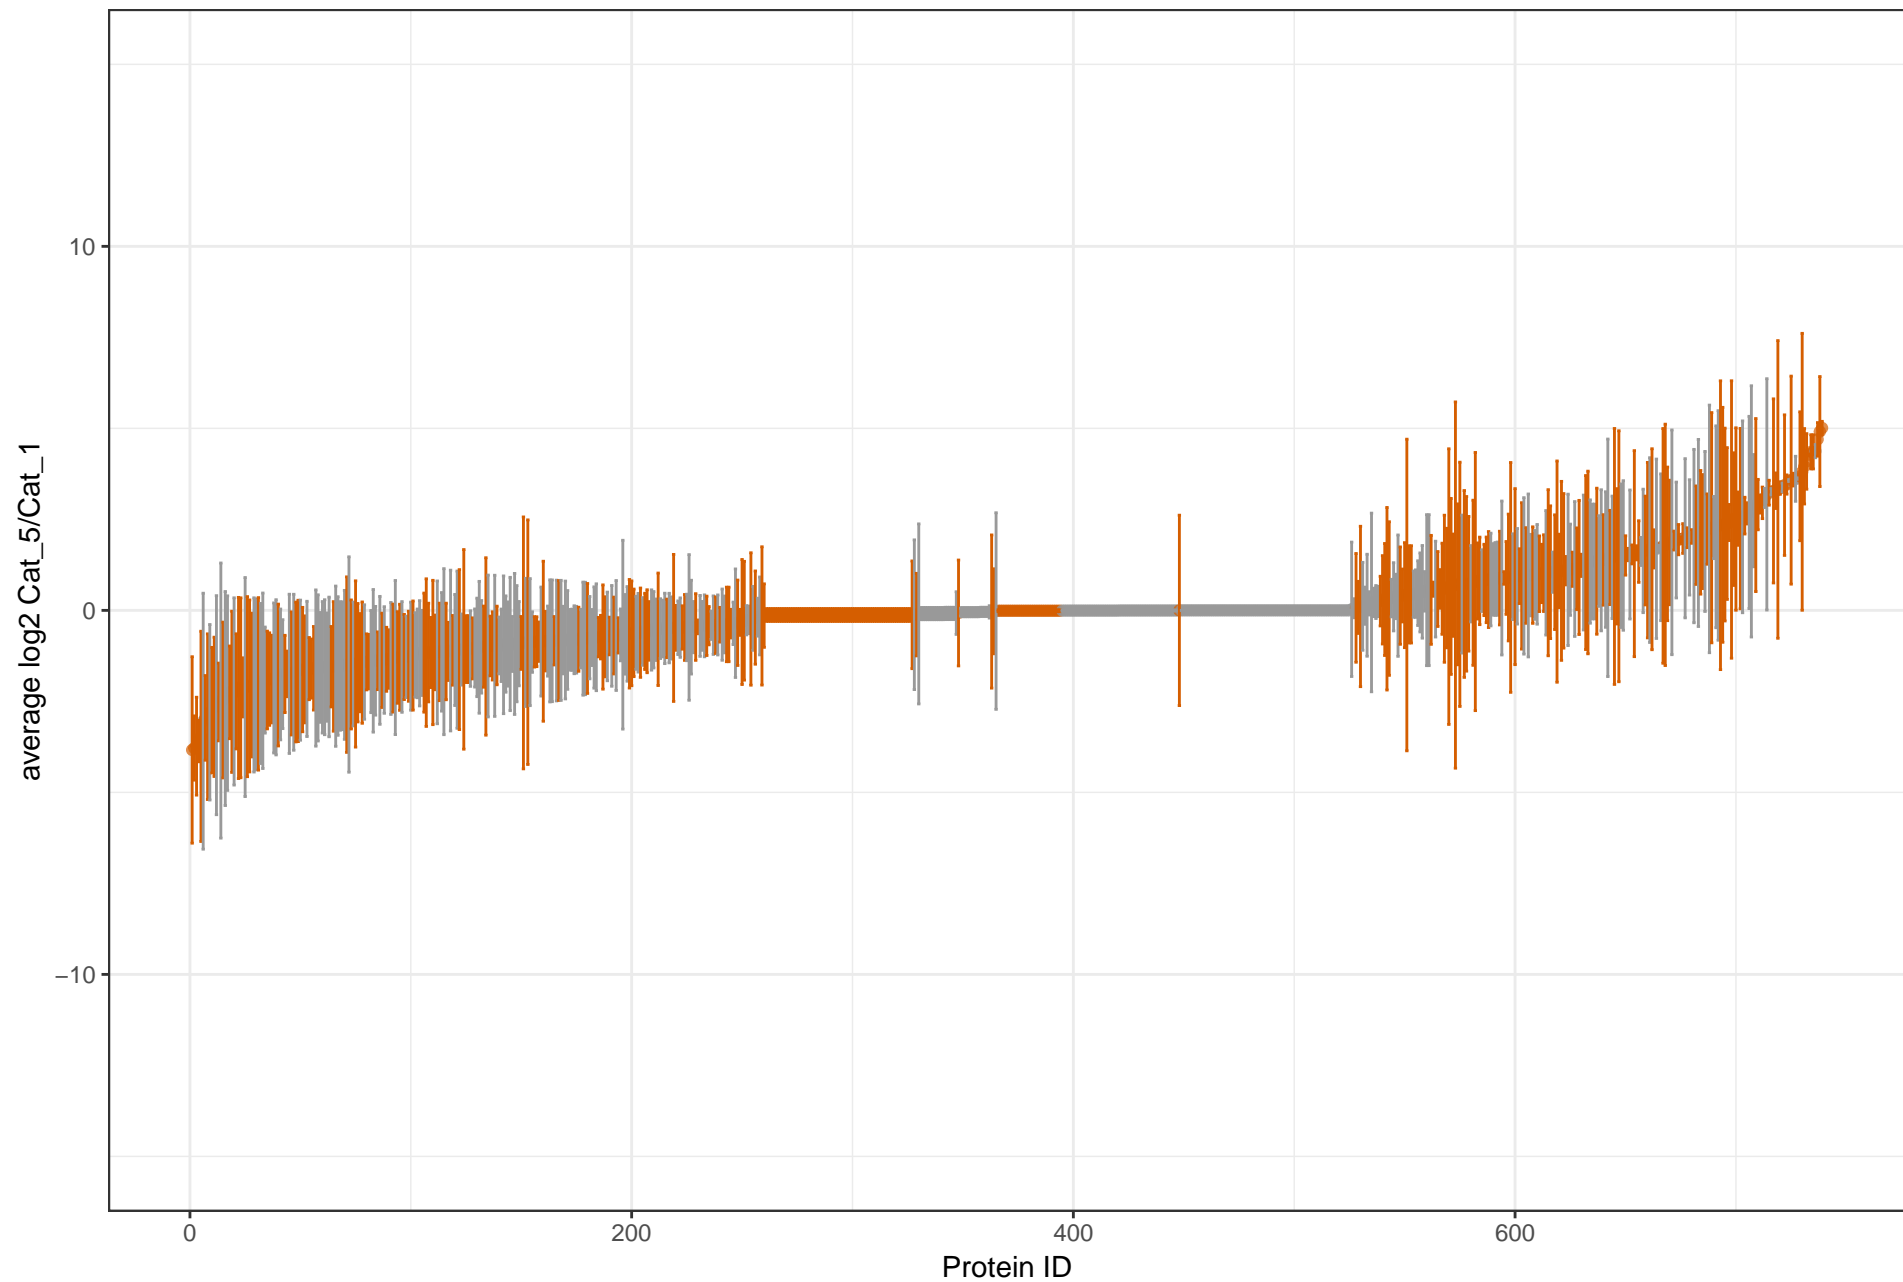

Supplement: supp [file elife-75798-supp-v1.zip]

**P-value vs Fold change**

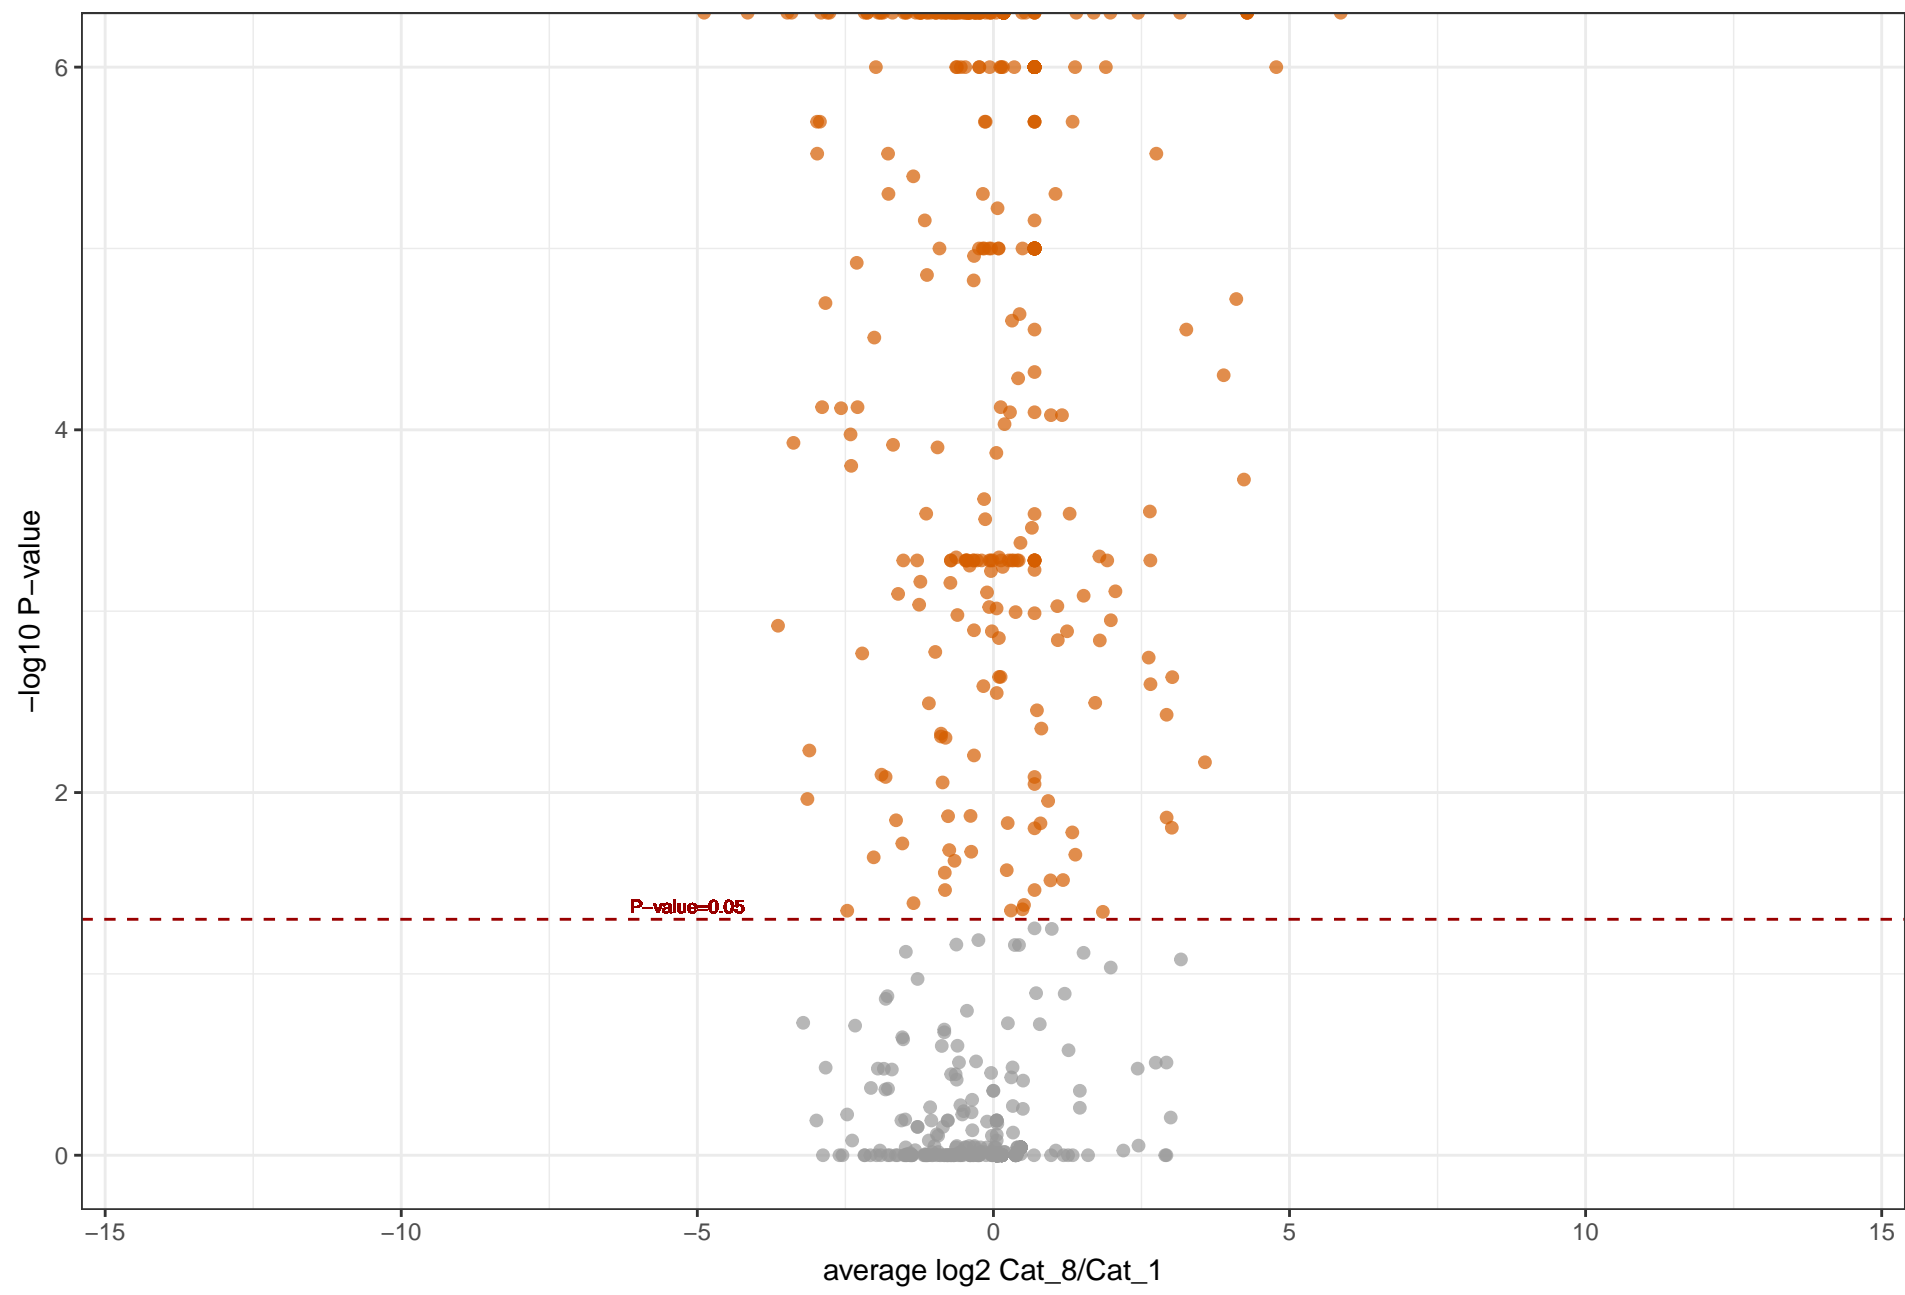

Supplement: supp [file elife-75798-supp-v1.zip]

MA plot

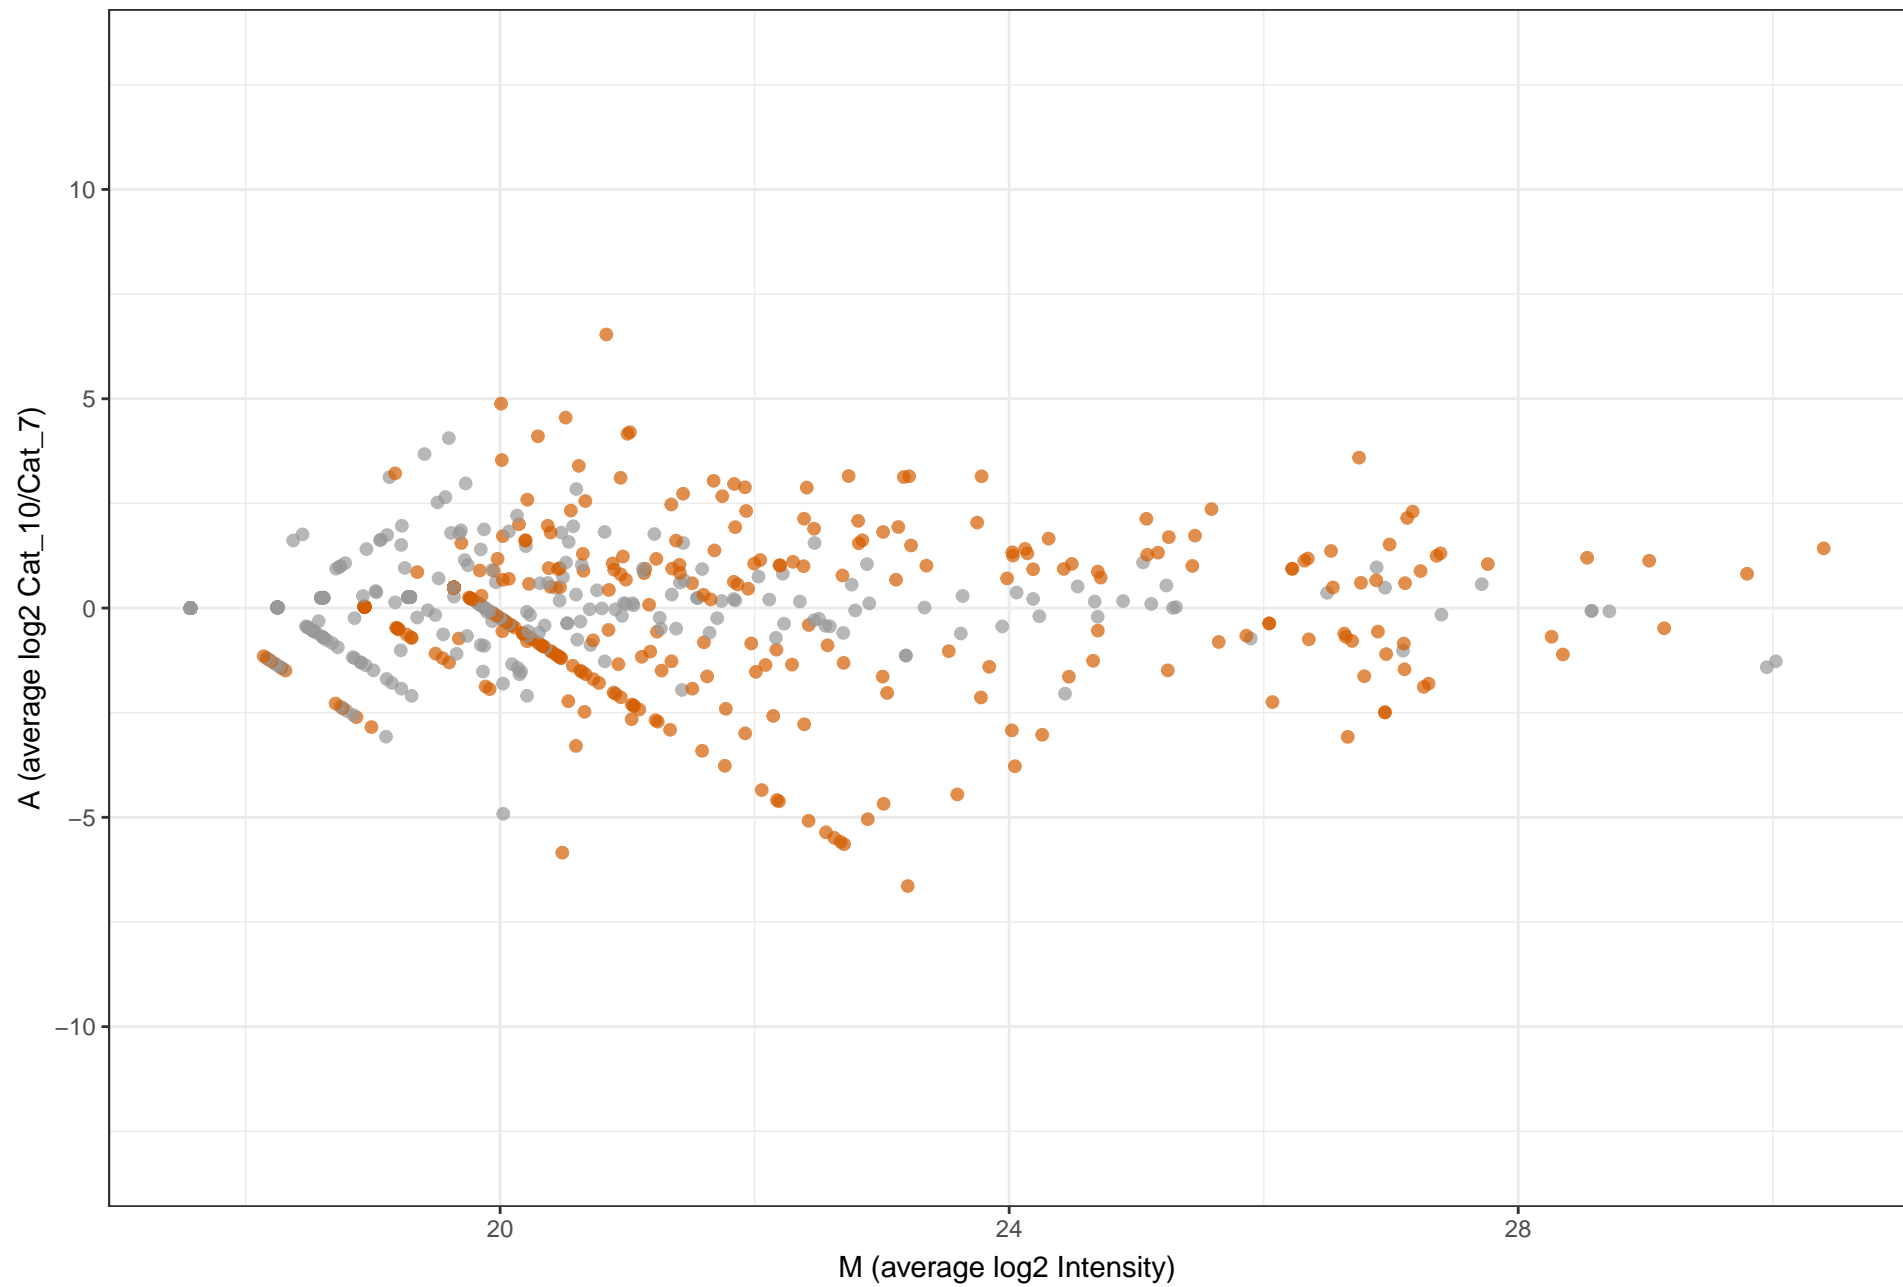

Supplement: supp [file elife-75798-supp-v1.zip]

MA plot

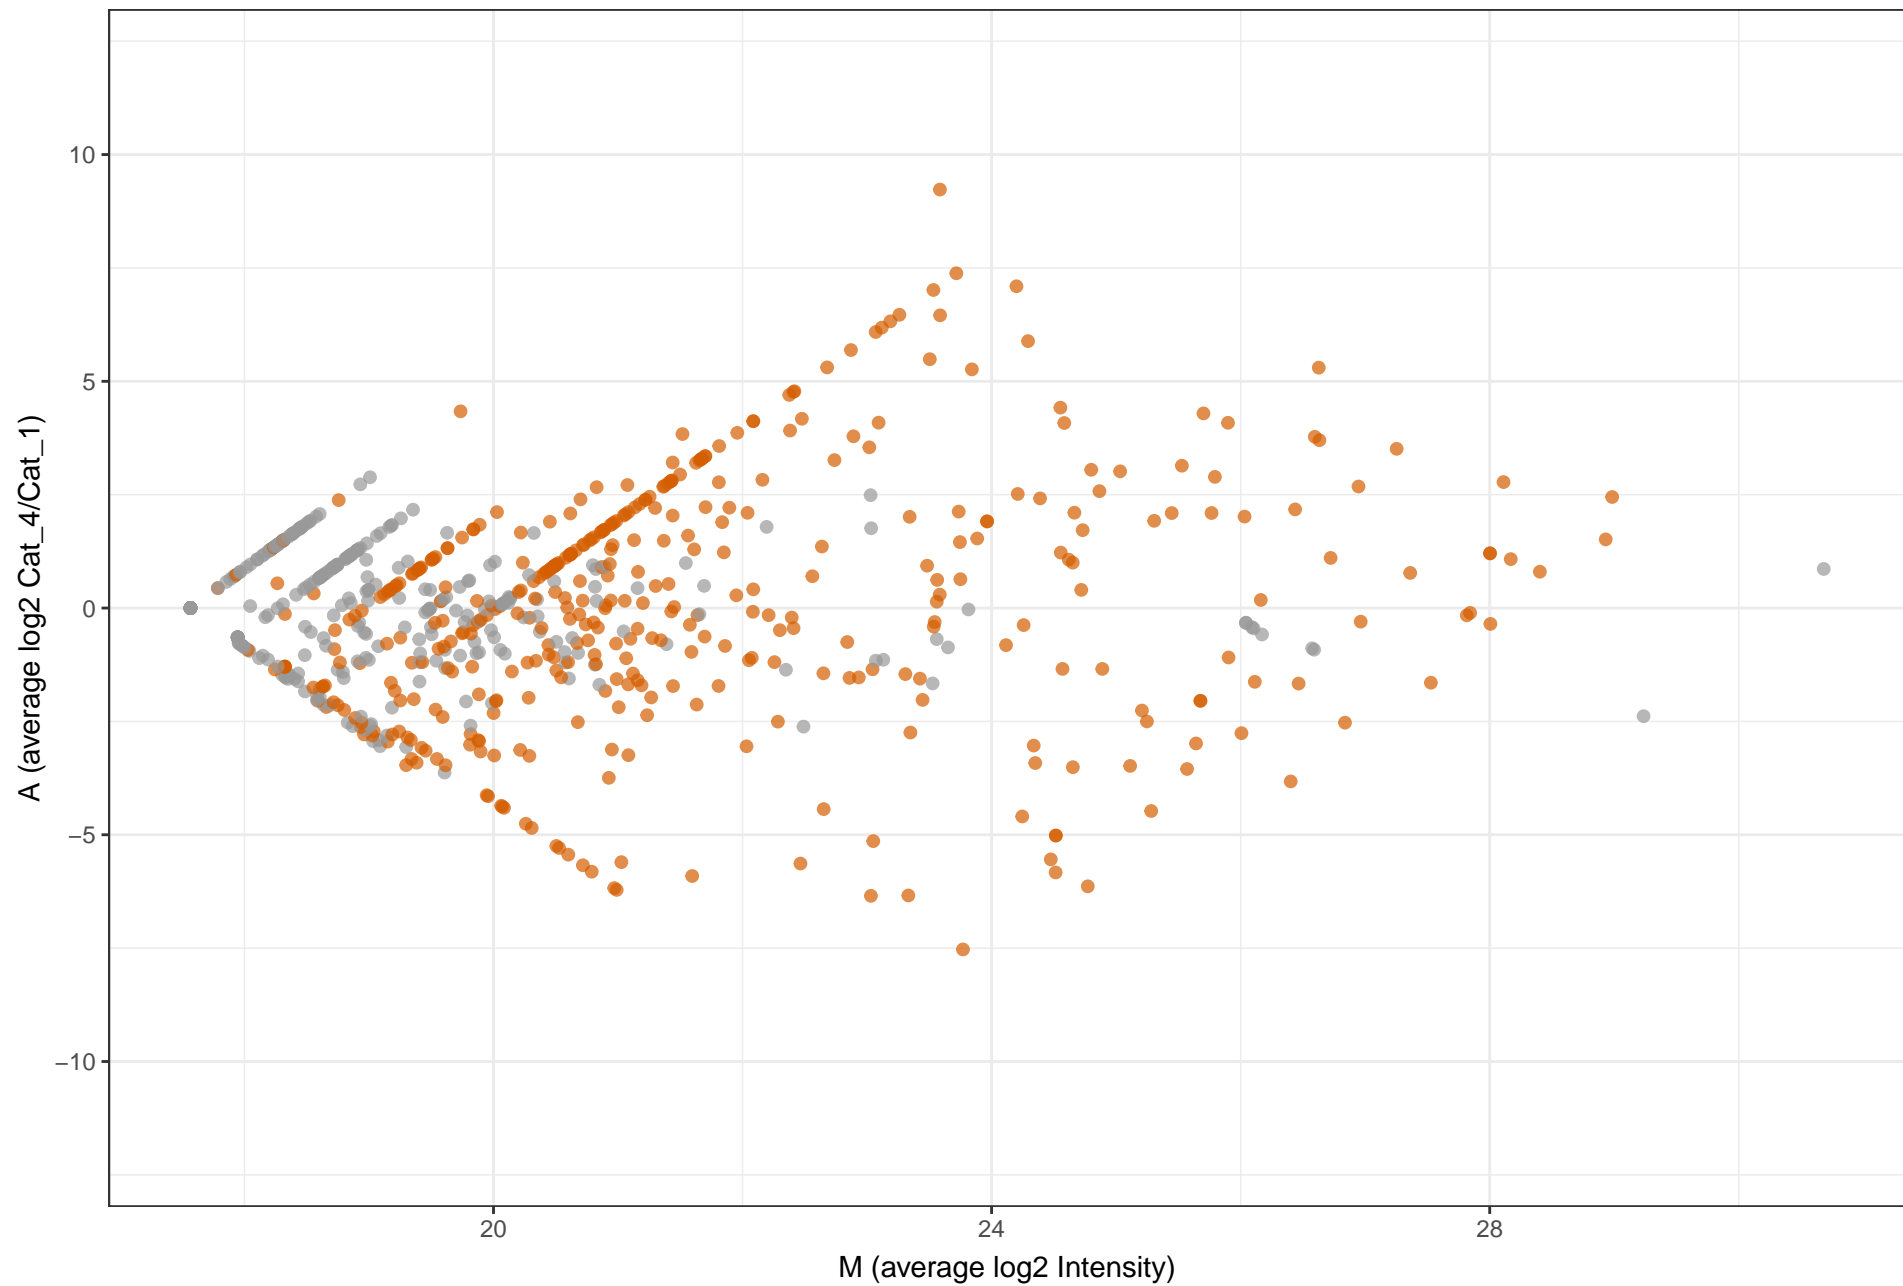

Supplement: supp [file elife-75798-supp-v1.zip]

Value-ordered fold change

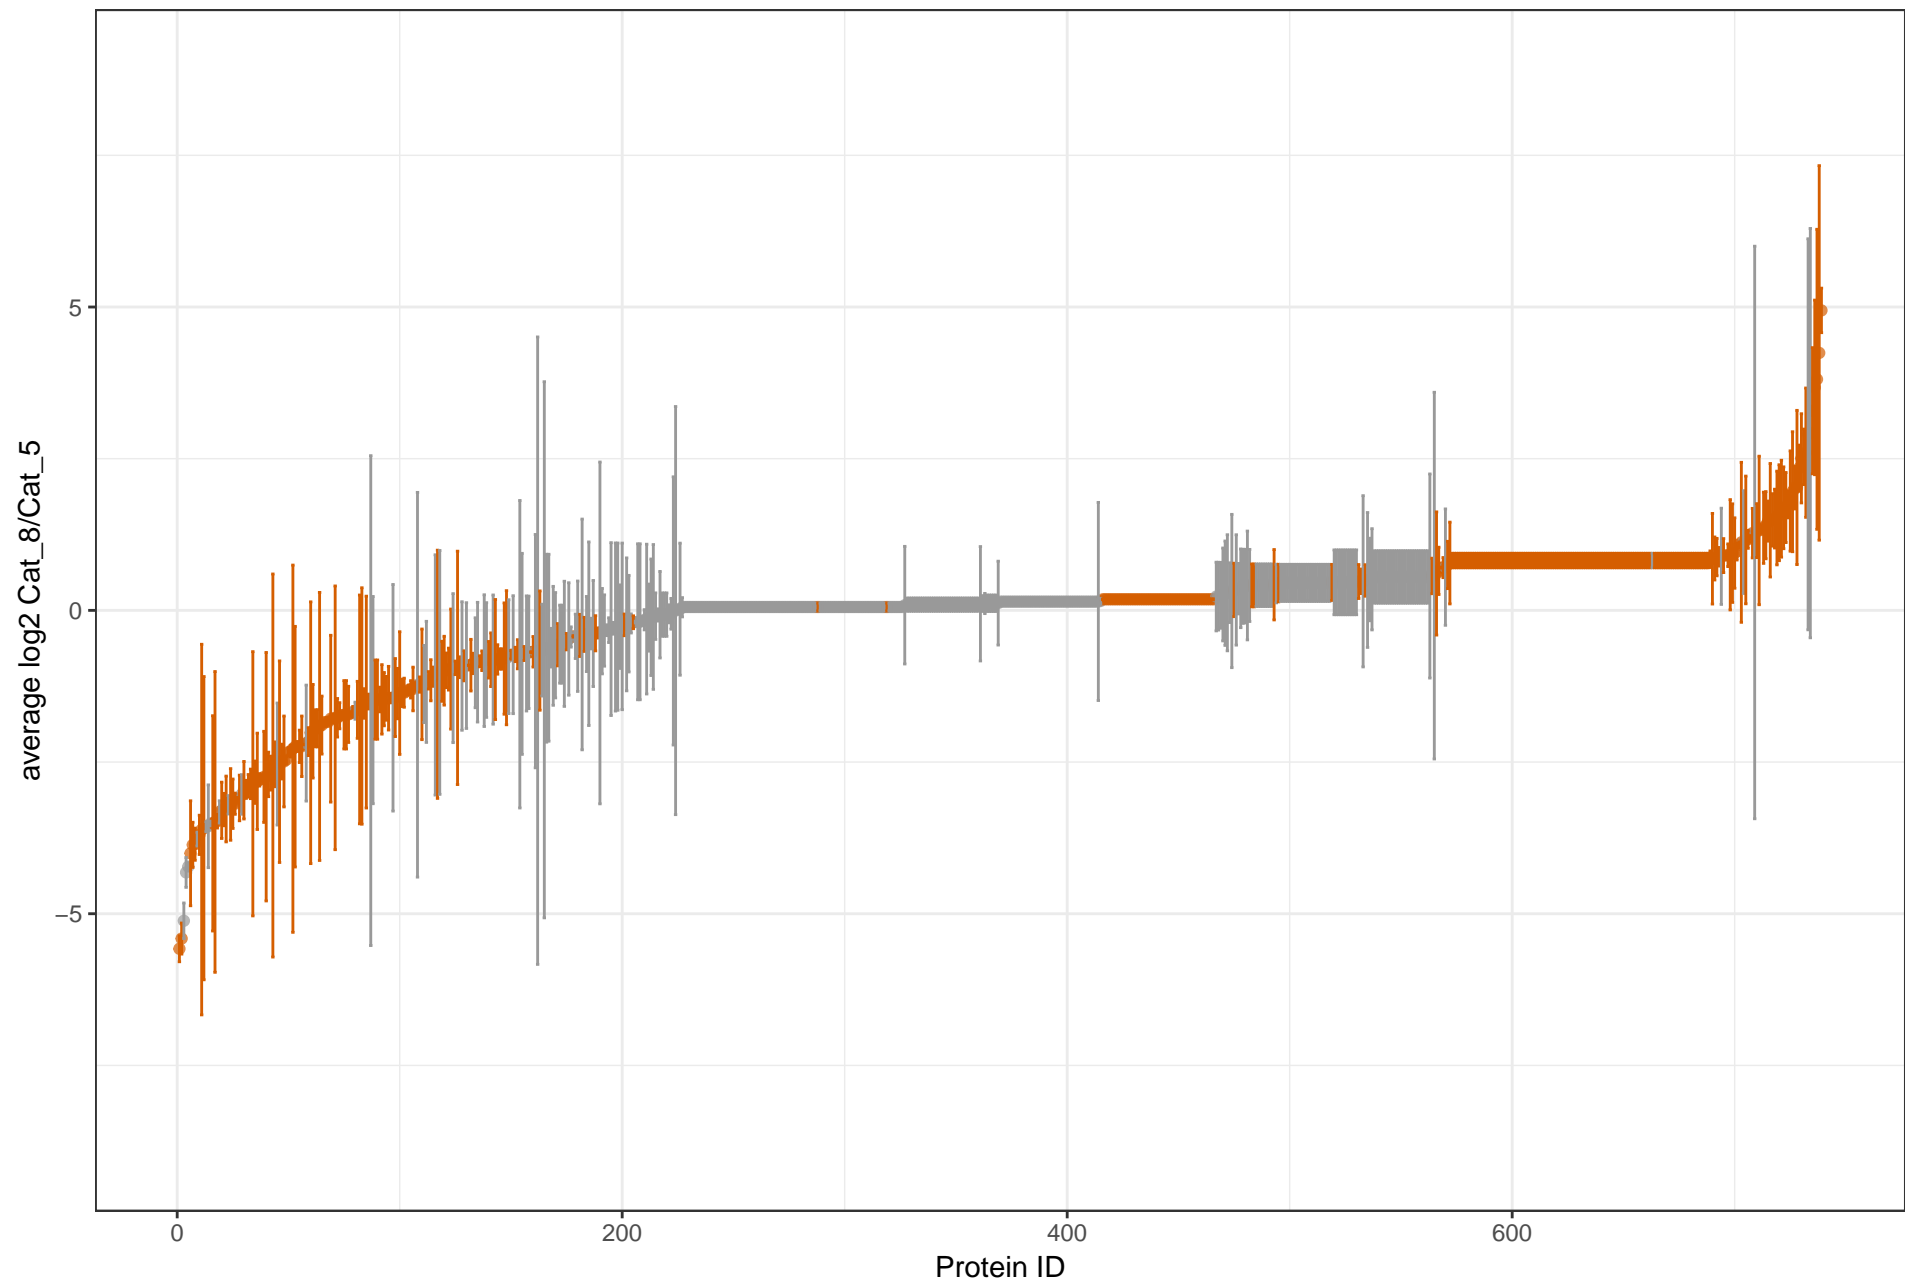

Supplement: supp [file elife-75798-supp-v1.zip]

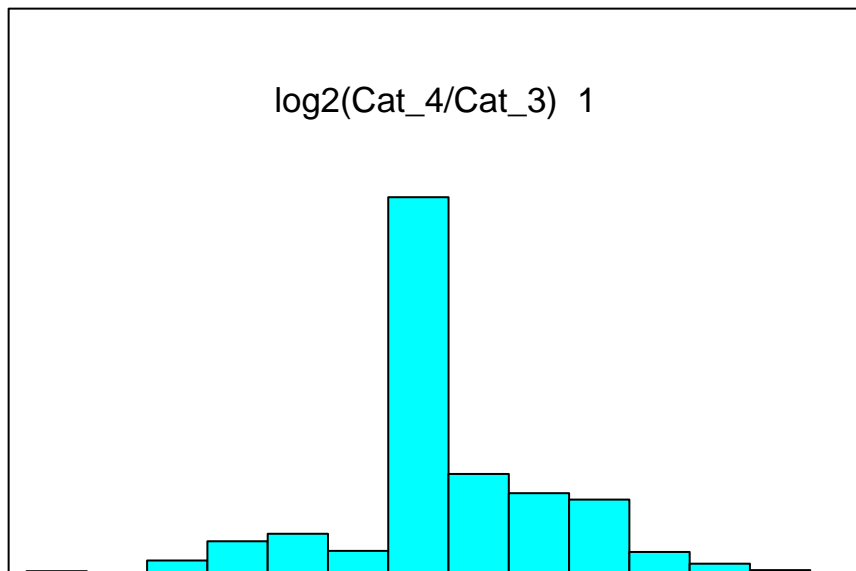

-6 -4 -2 0 2 4 6

6

4

2

0

-2

-4

-6

0.81

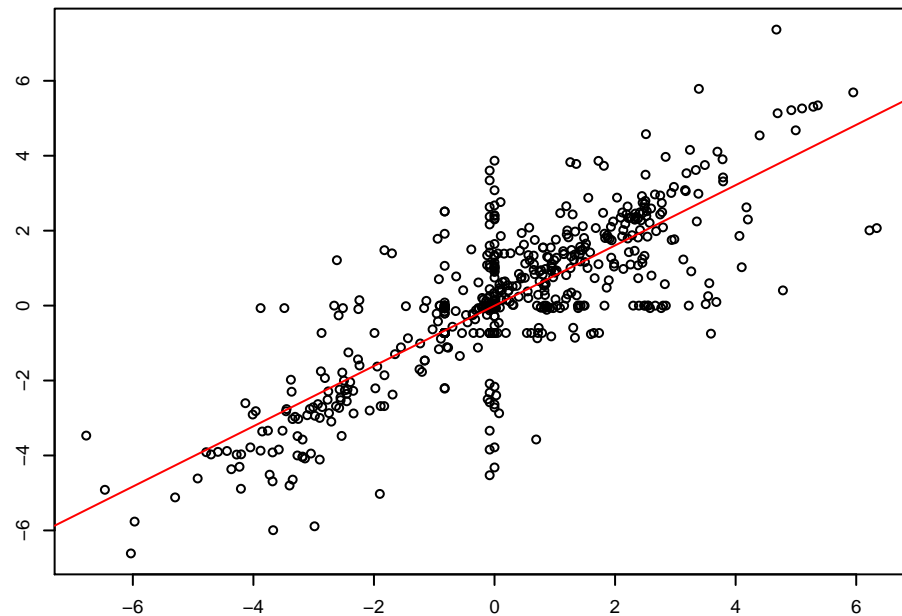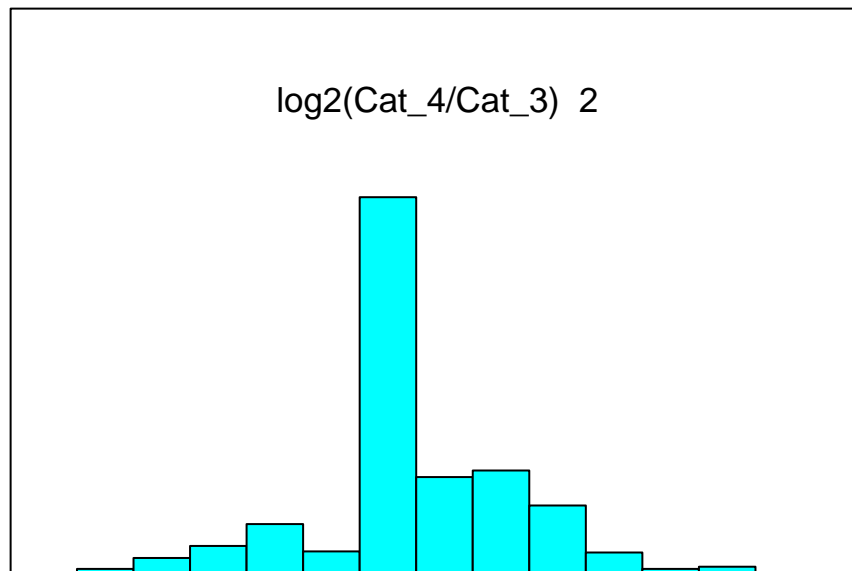

Supplement: supp [file elife-75798-supp-v1.zip]

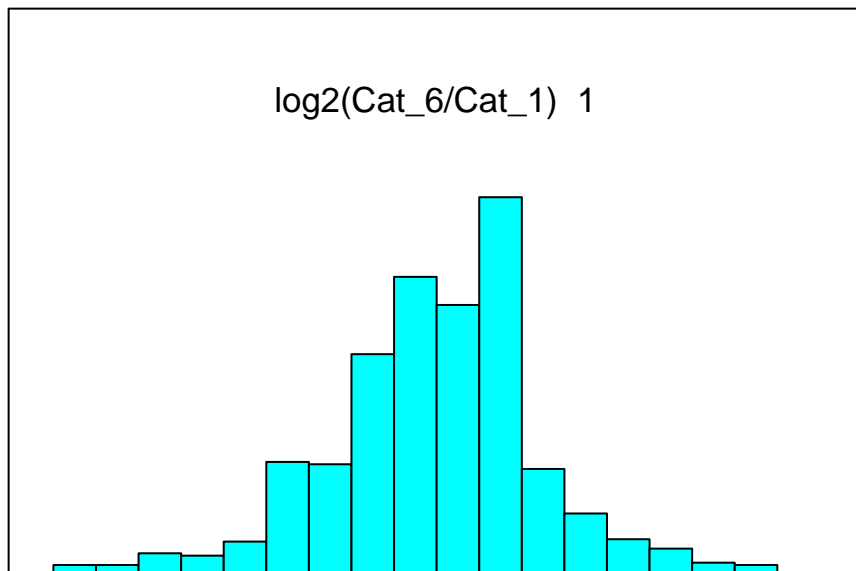

-5 0 5

0.85

5  
0  
-5  
-10

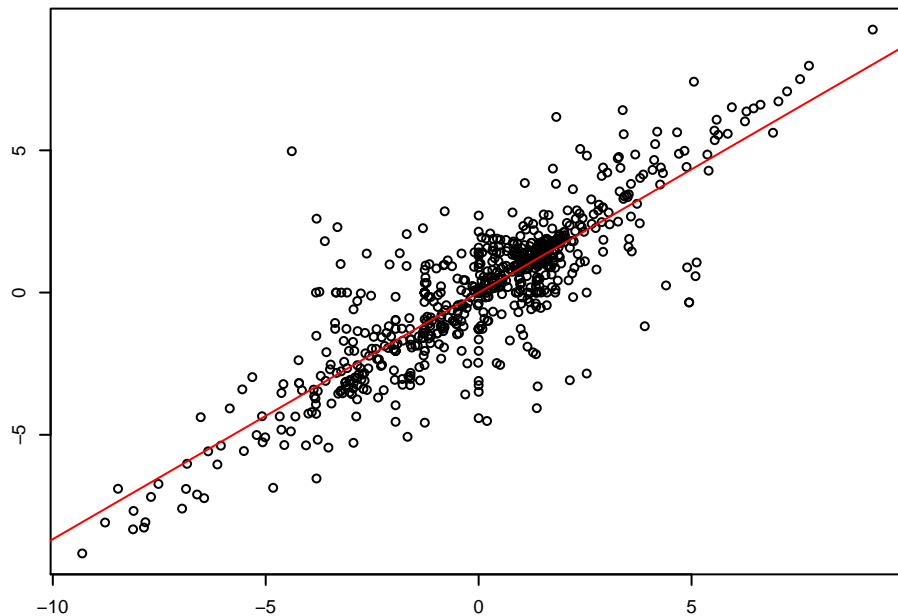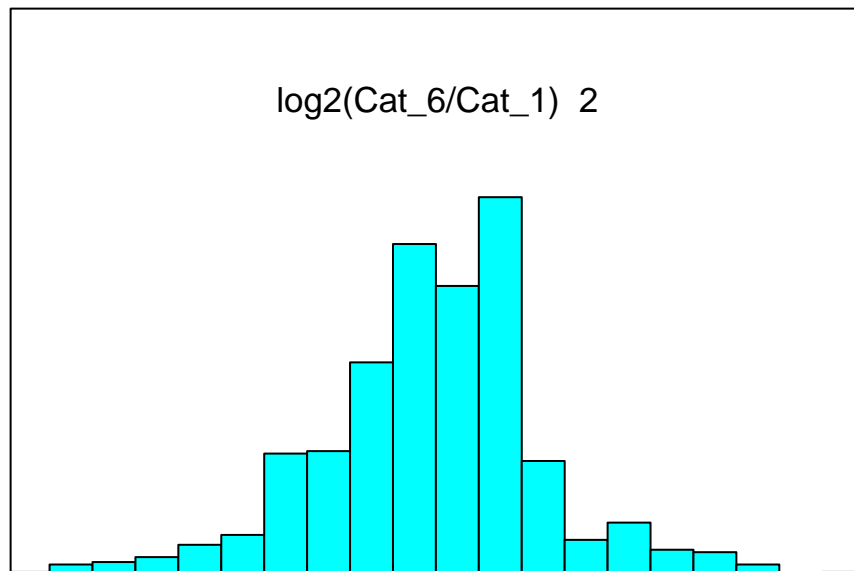

Supplement: supp [file elife-75798-supp-v1.zip]

Value-ordered fold change

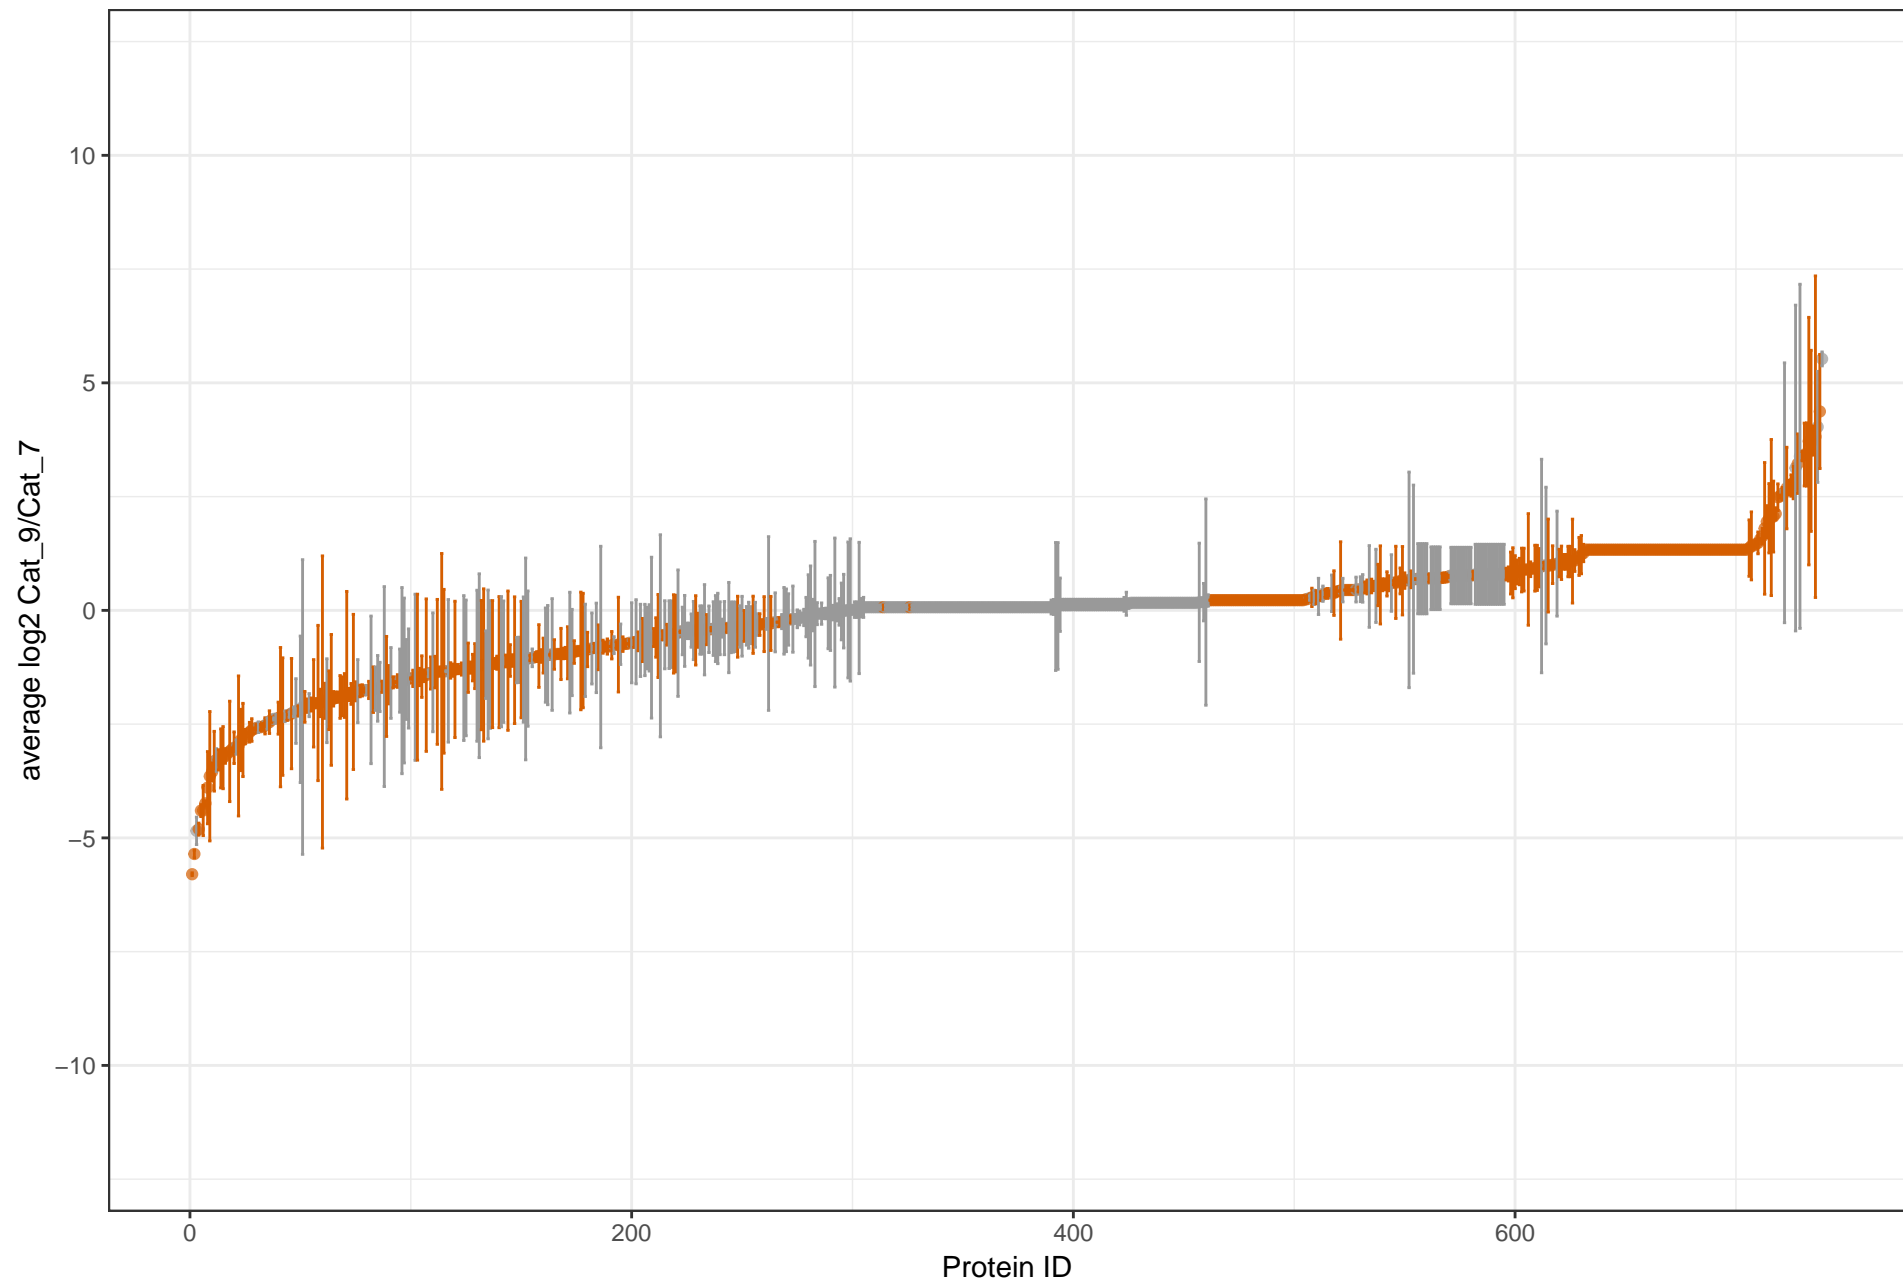

Supplement: supp [file elife-75798-supp-v1.zip]

**P-value vs Fold change**

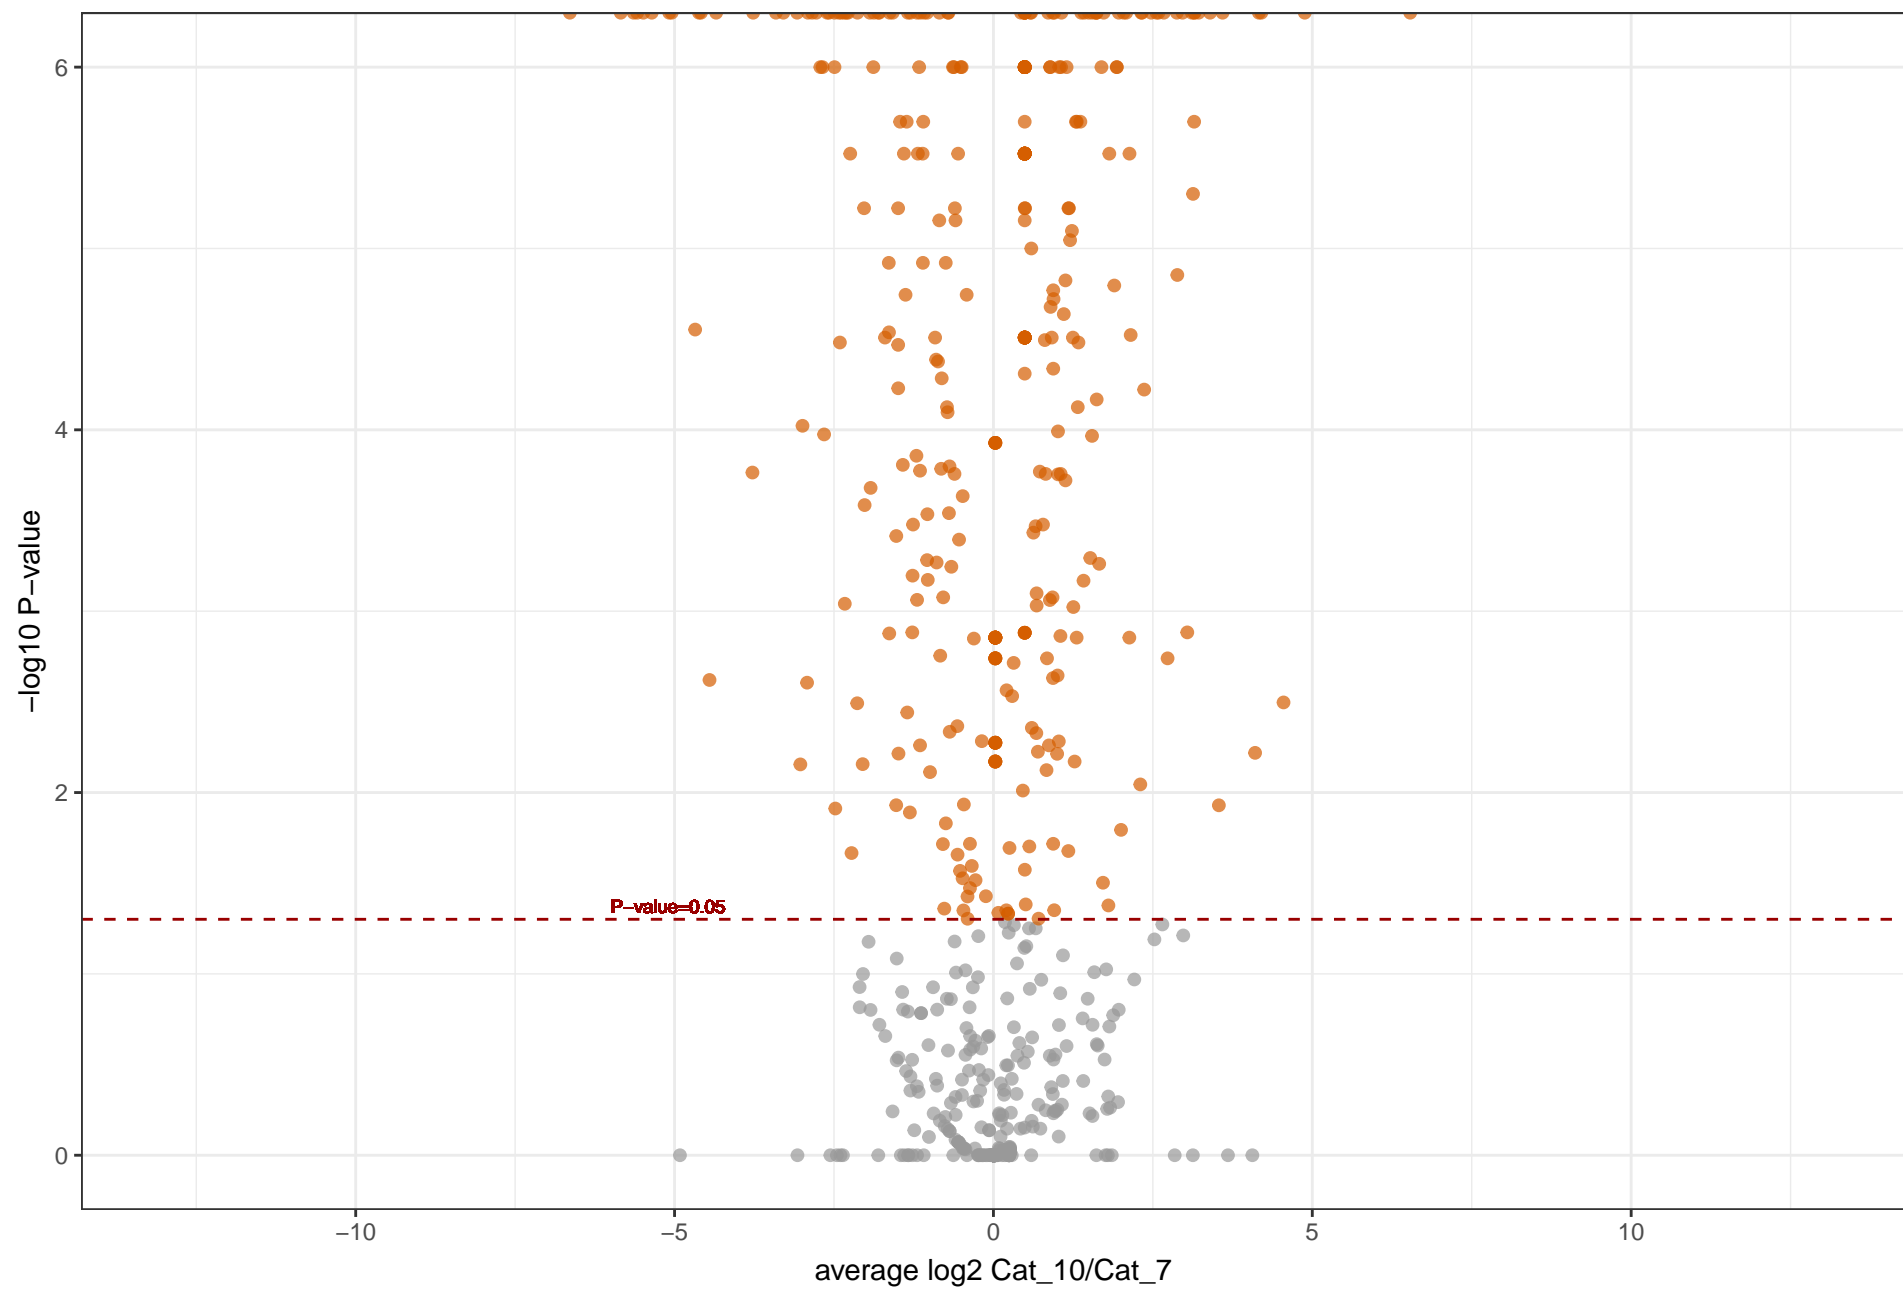

Supplement: supp [file elife-75798-supp-v1.zip]

MA plot

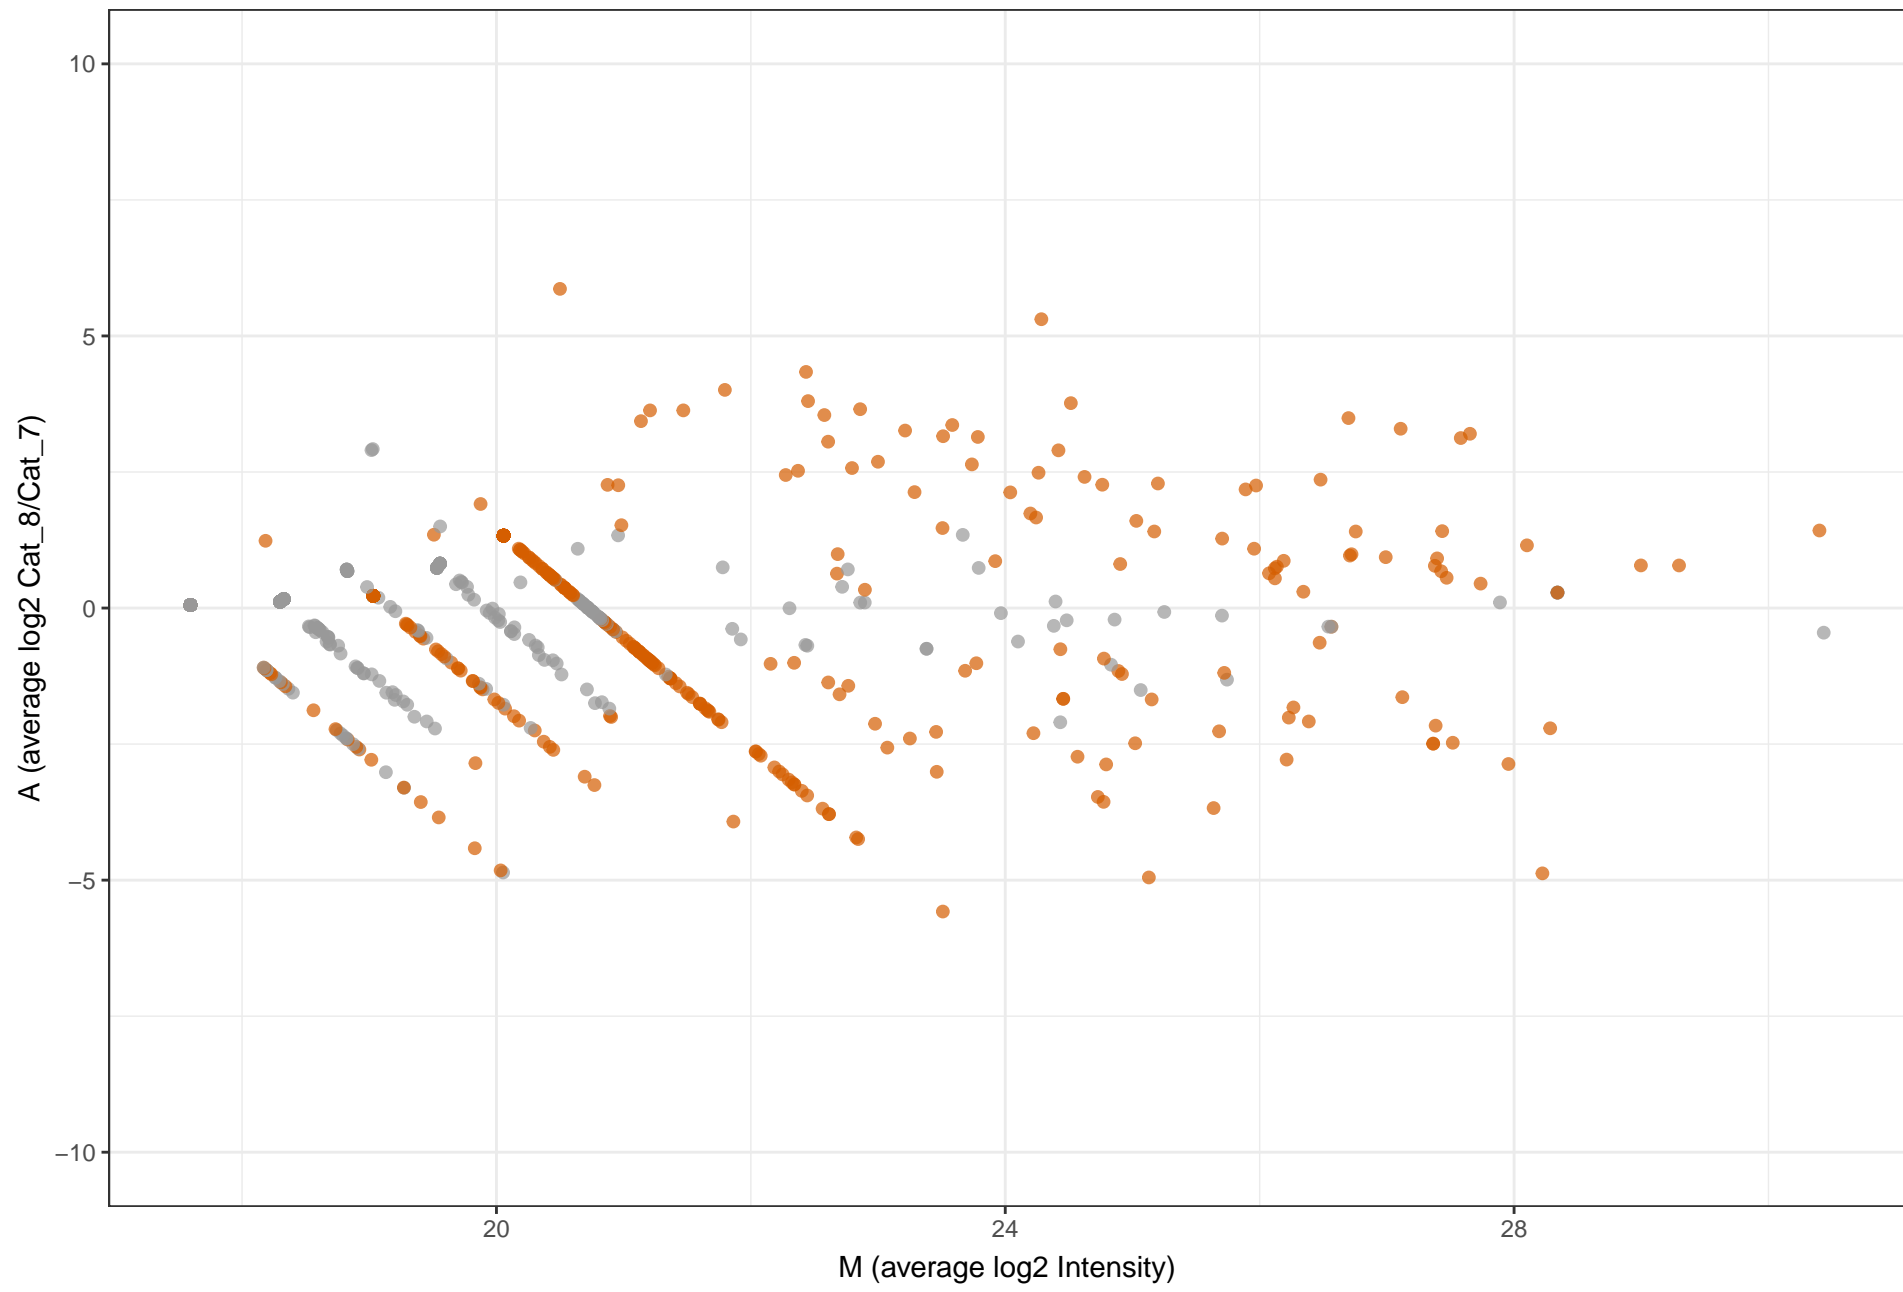

Supplement: supp [file elife-75798-supp-v1.zip]

MA plot

A (average log2 Cat\_10/Cat\_1)

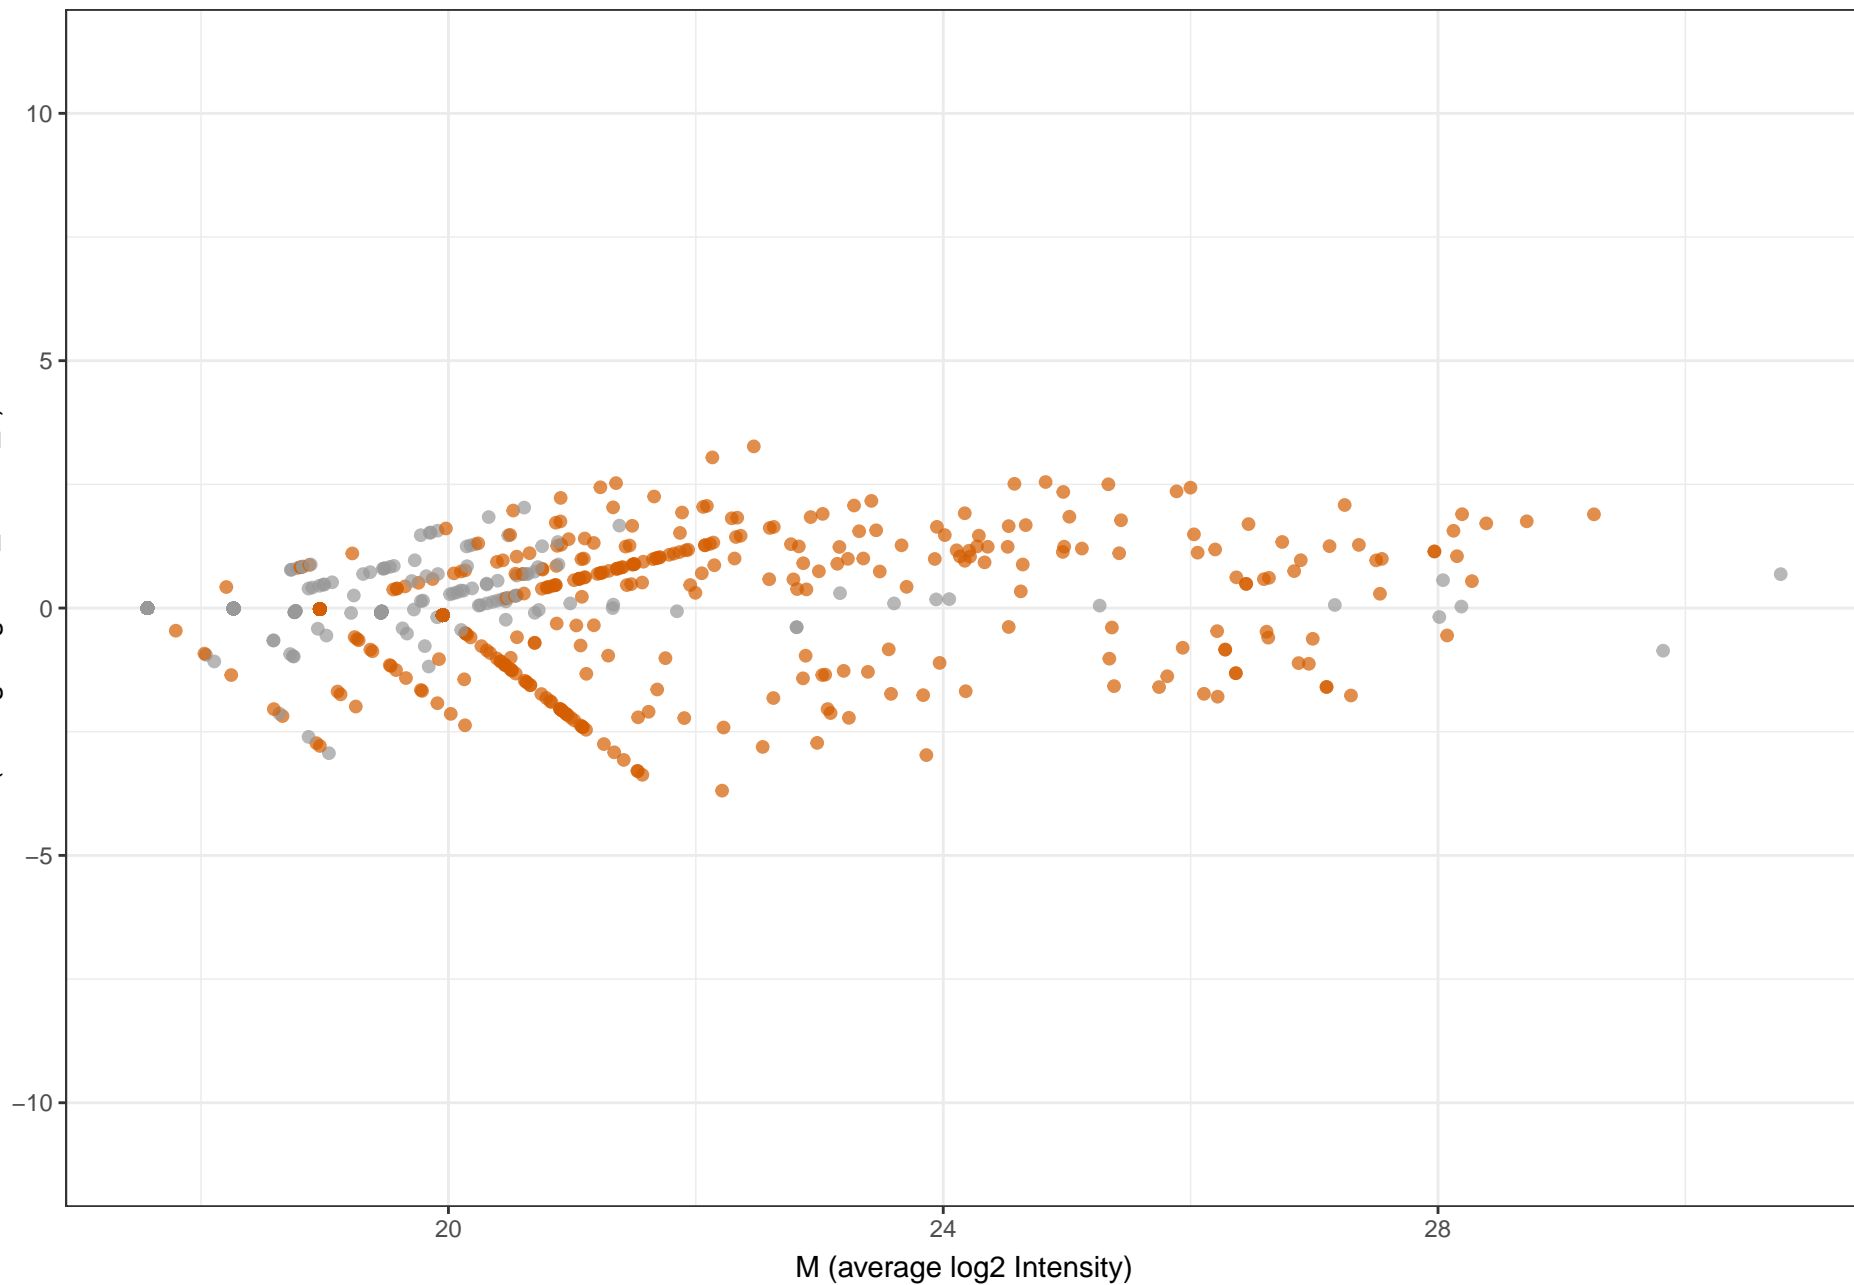

Supplement: supp [file elife-75798-supp-v1.zip]

MA plot

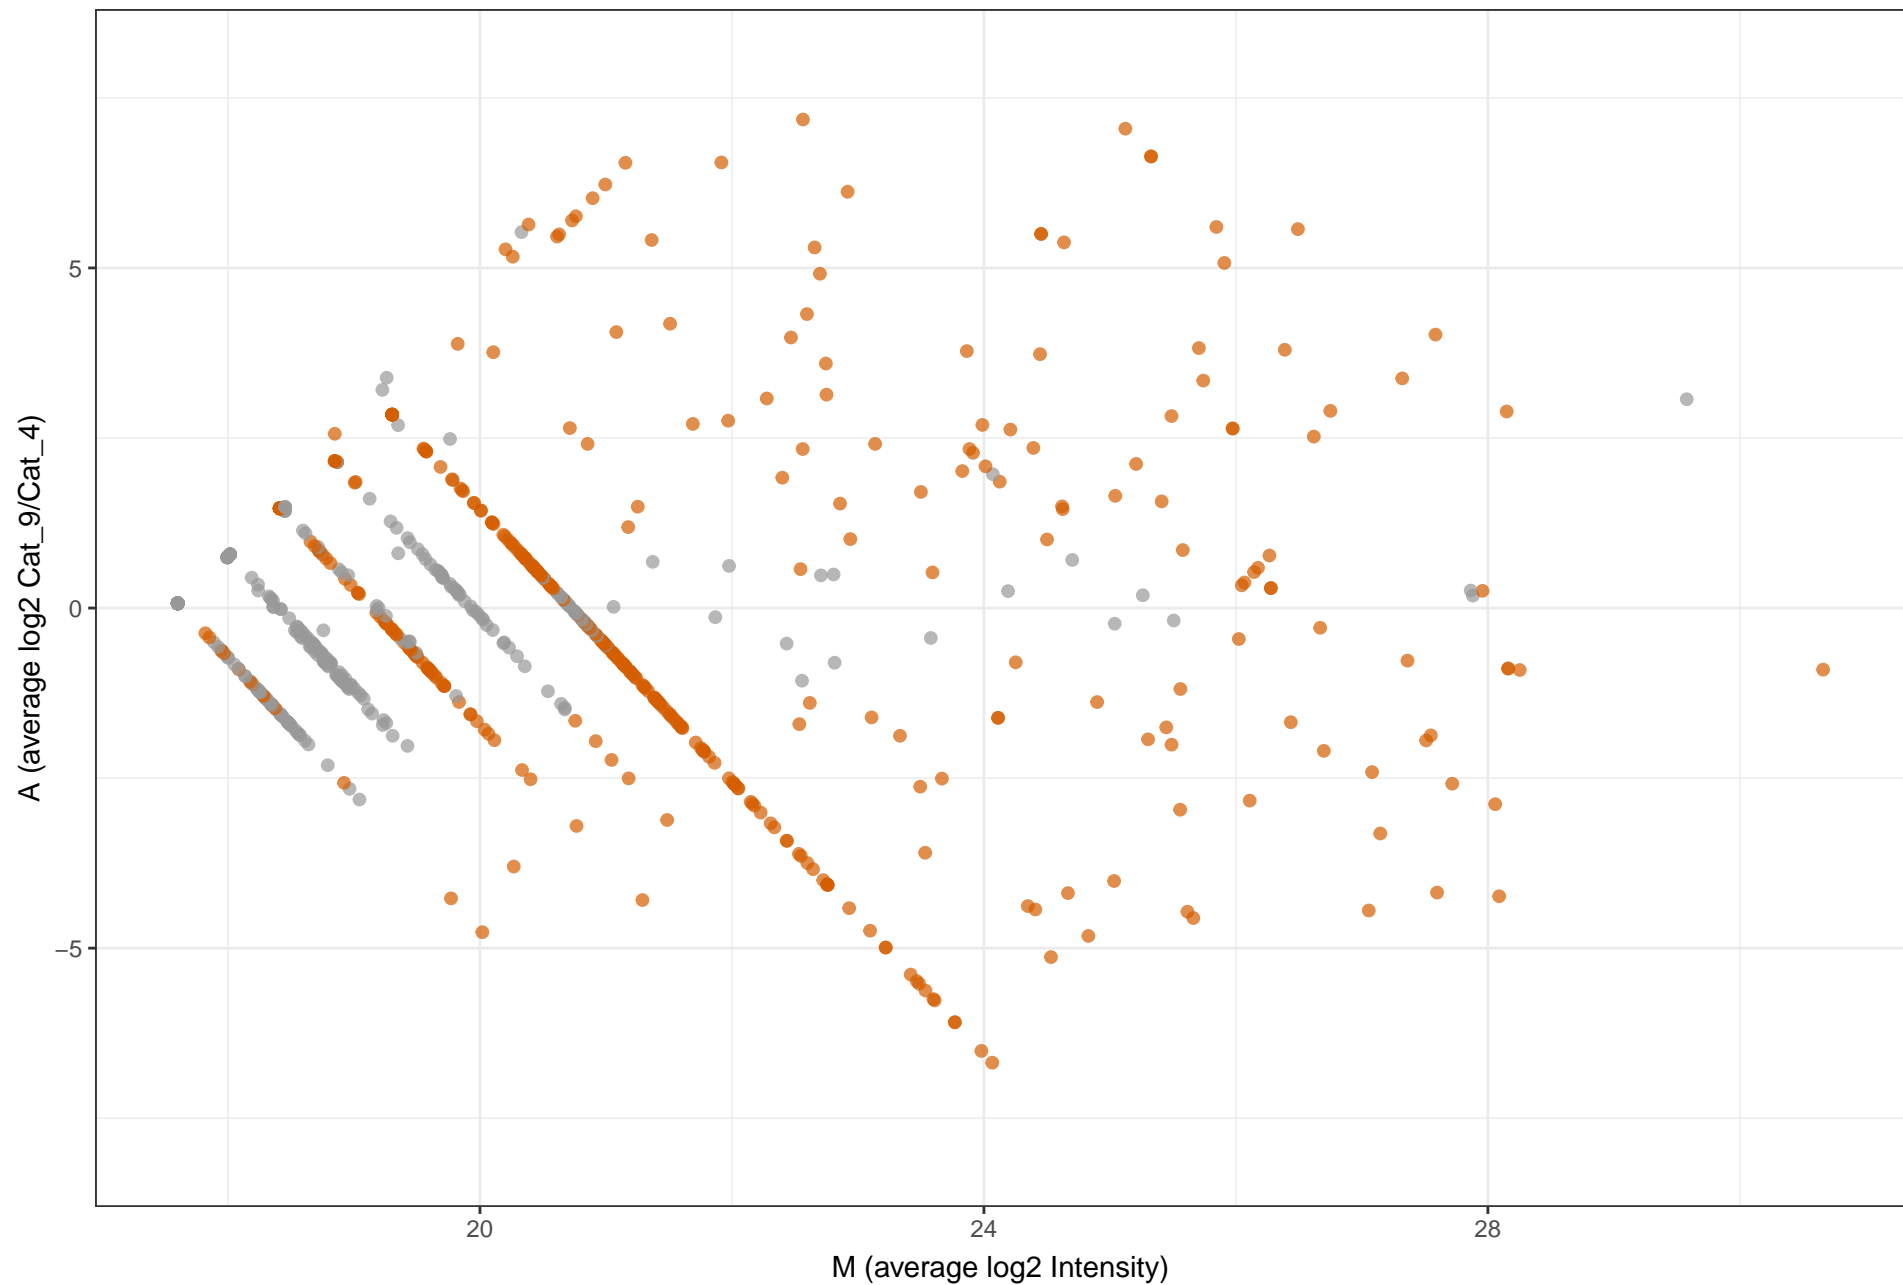

Supplement: supp [file elife-75798-supp-v1.zip]

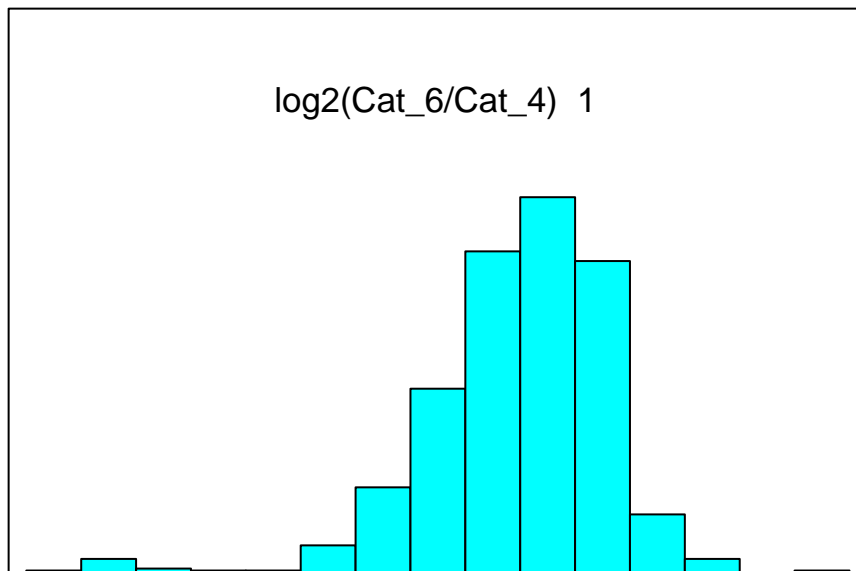

-5 0 5

5  
0  
-5

0.84

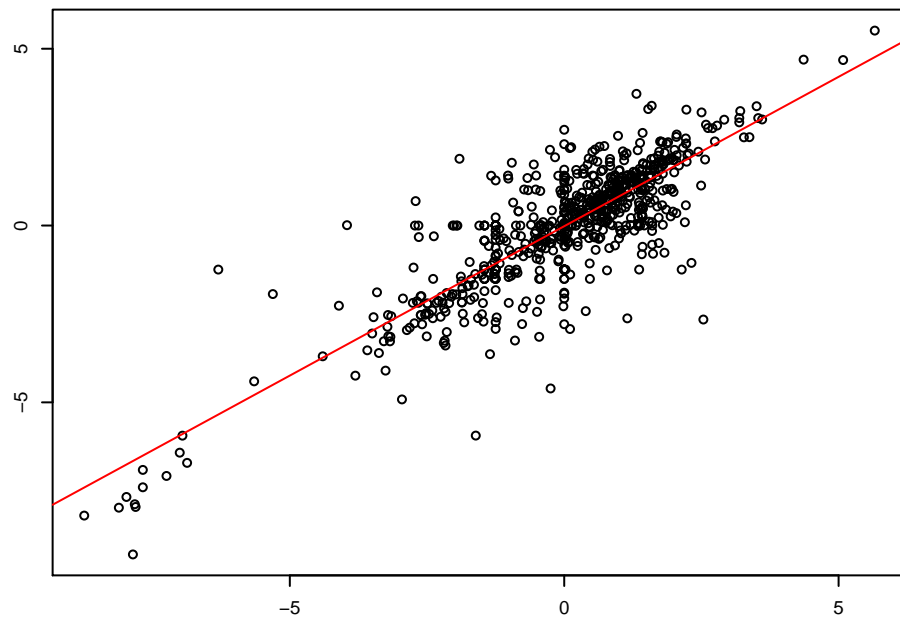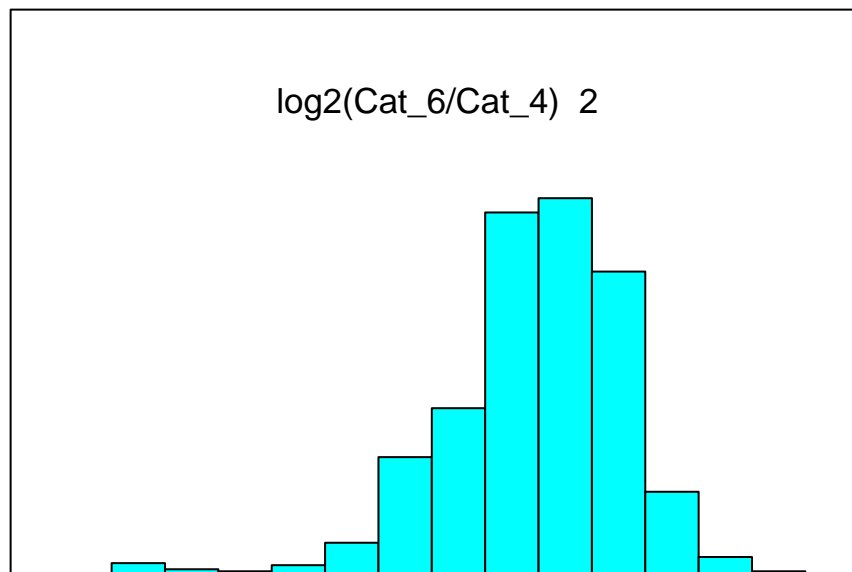

Supplement: supp [file elife-75798-supp-v1.zip]

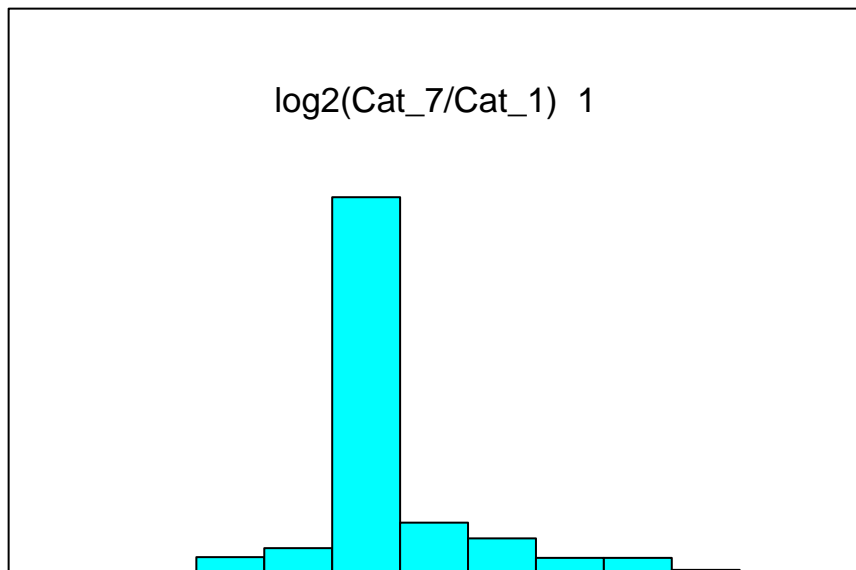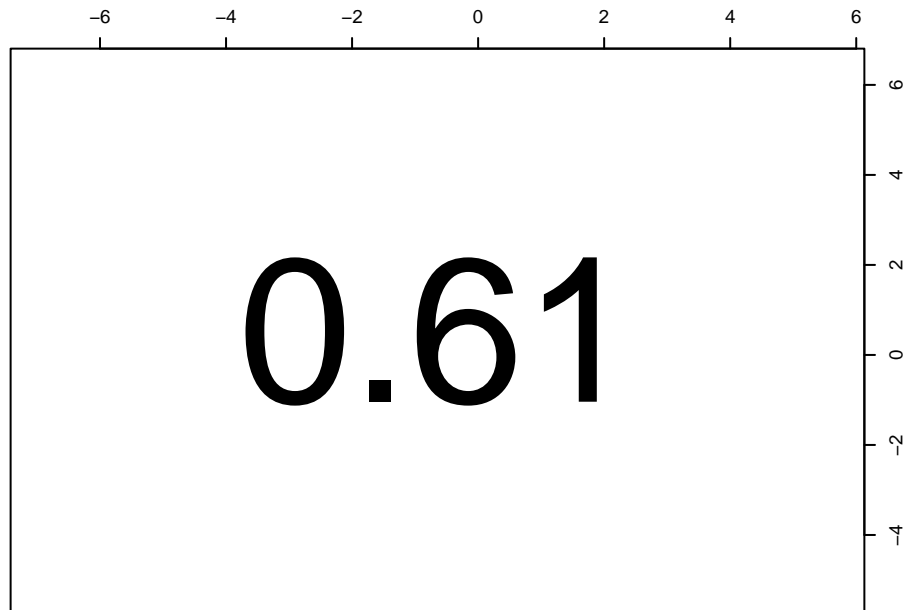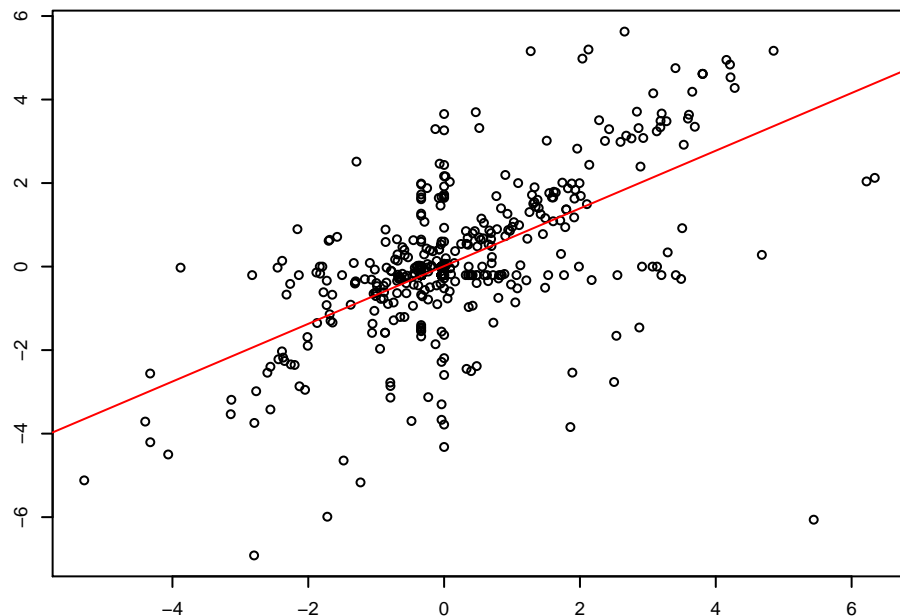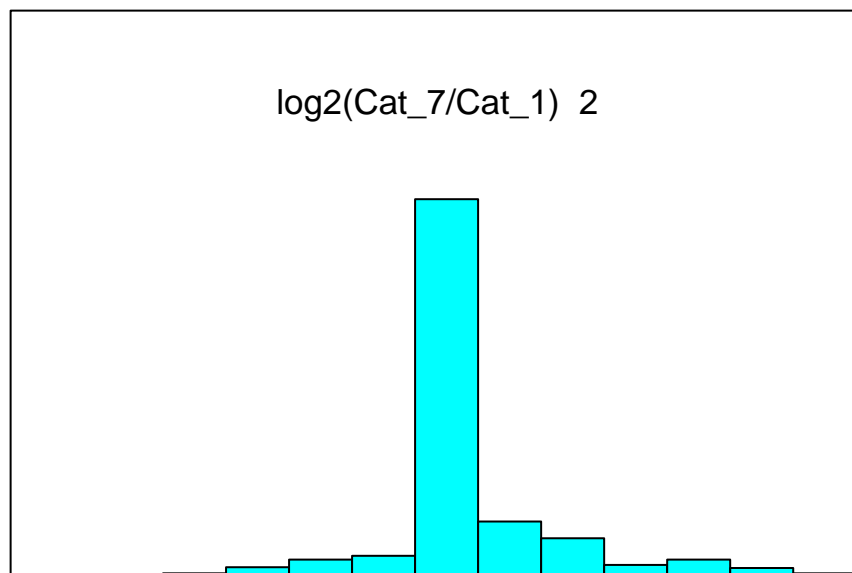

Supplement: supp [file elife-75798-supp-v1.zip]

MA plot

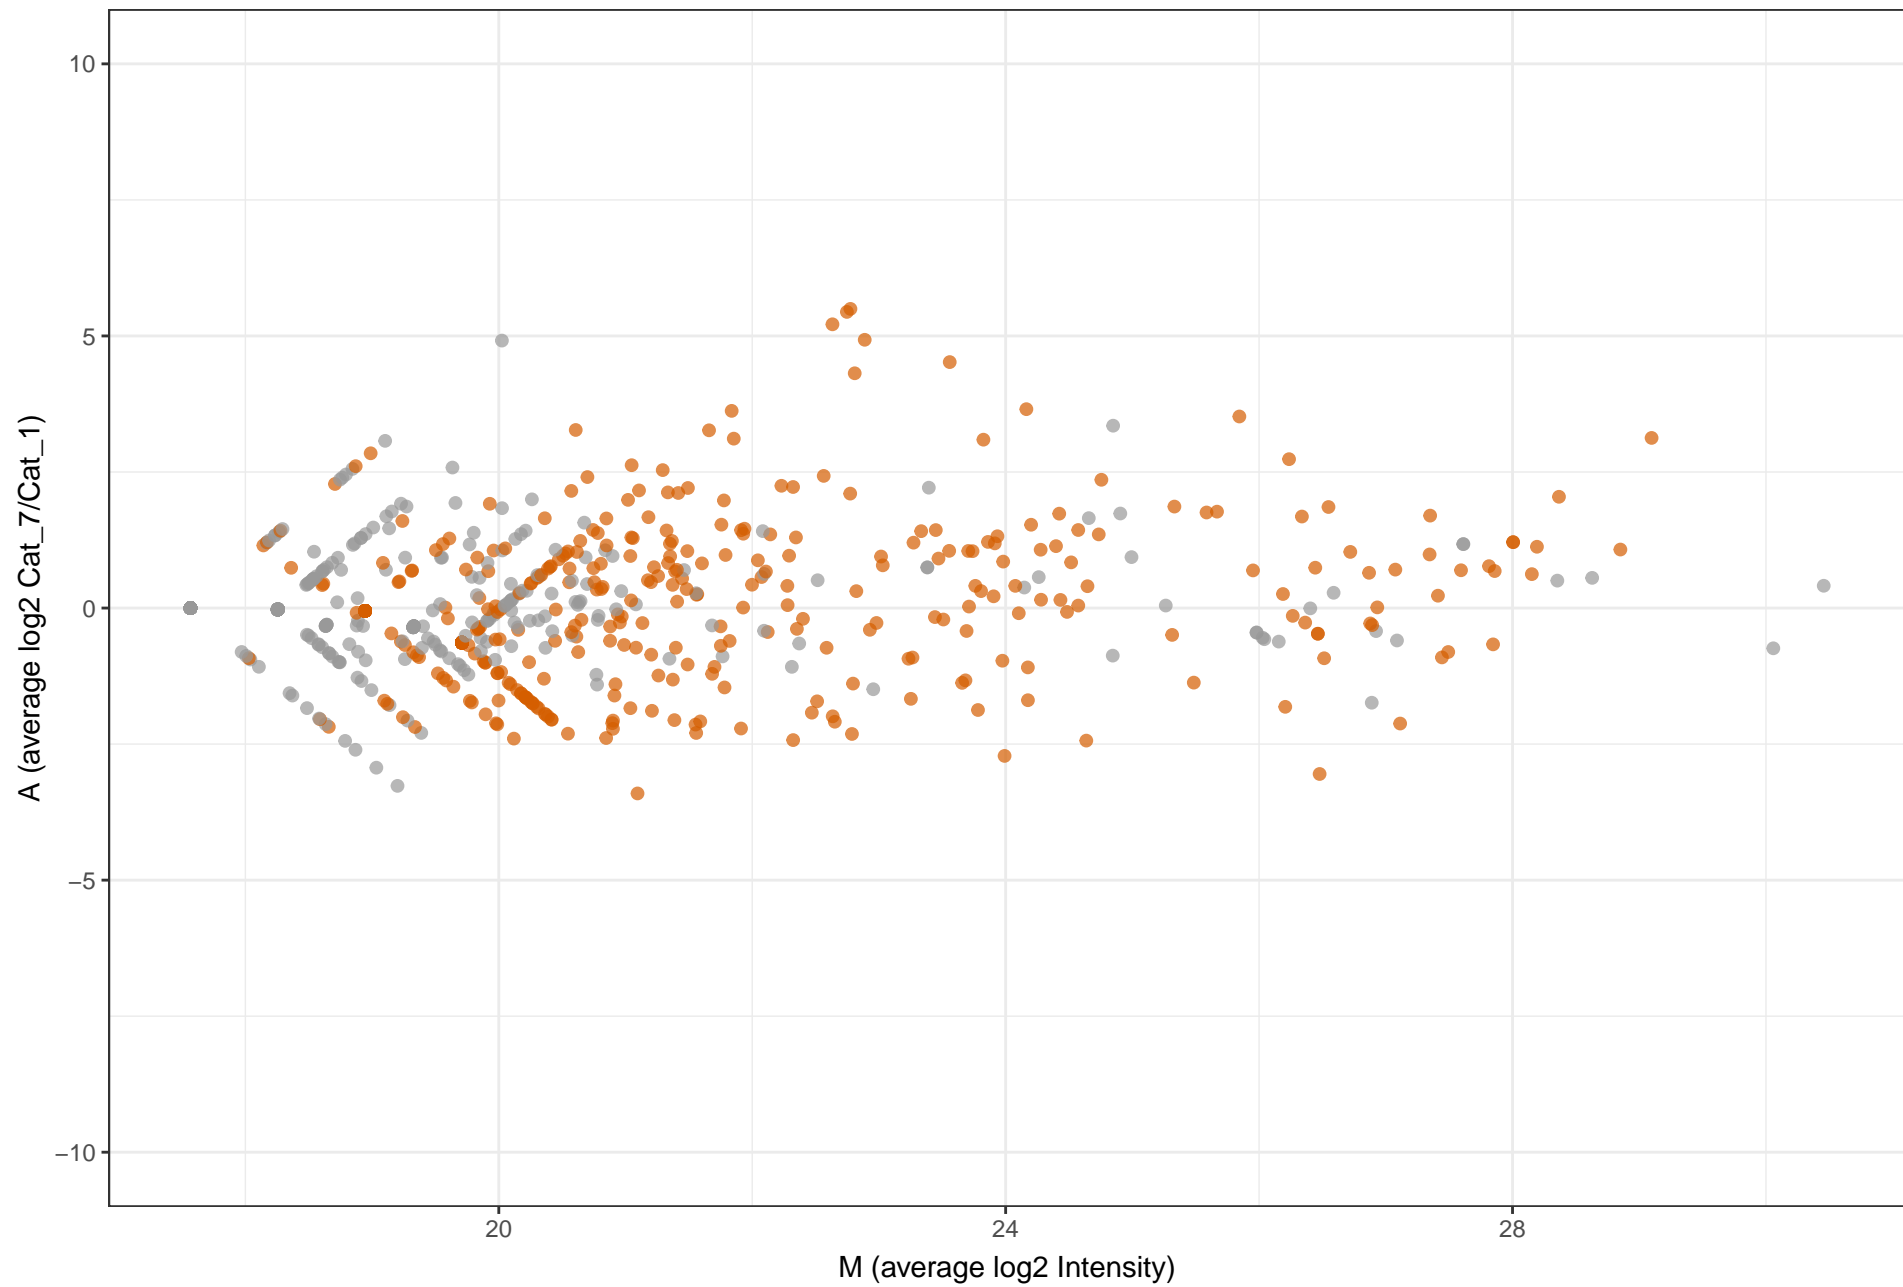

Supplement: supp [file elife-75798-supp-v1.zip]

P-value vs Fold change

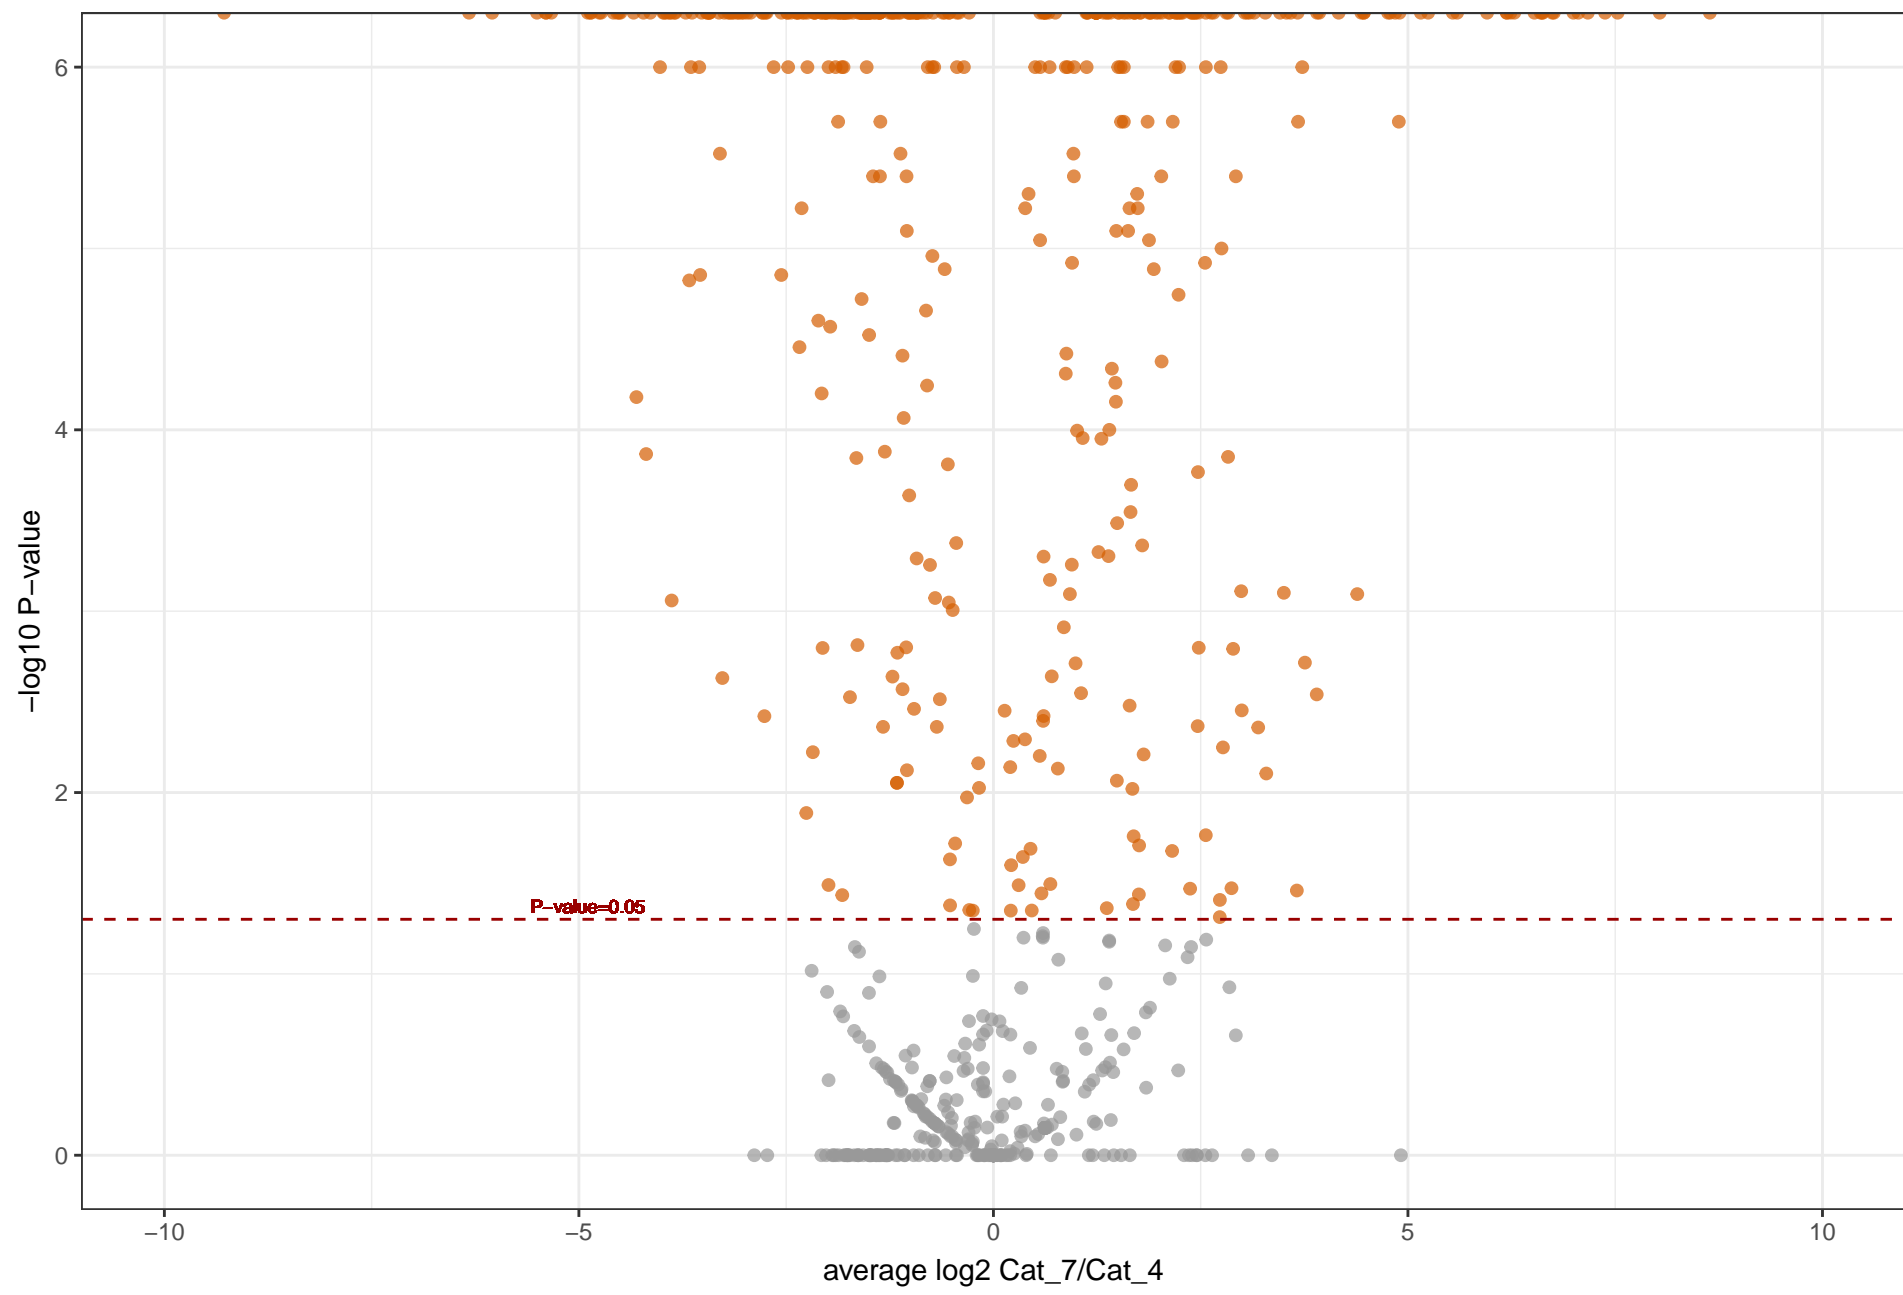

Supplement: supp [file elife-75798-supp-v1.zip]

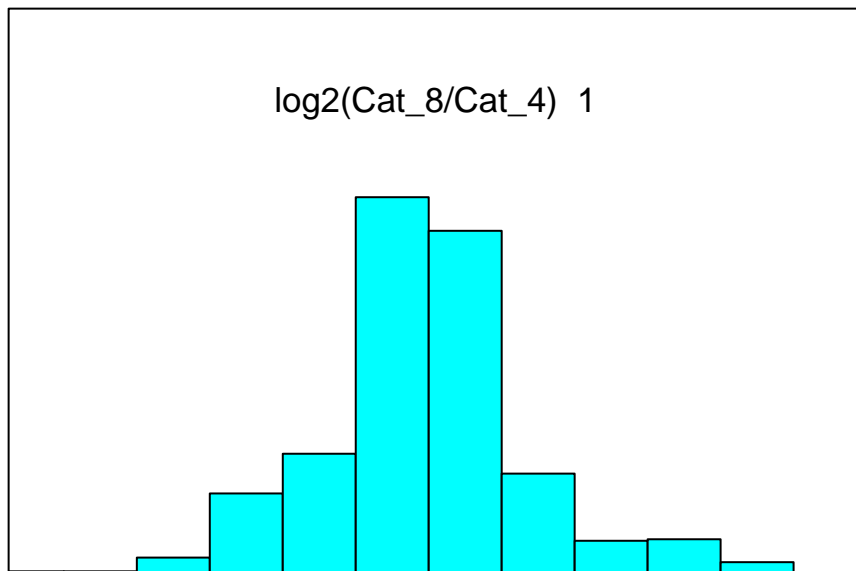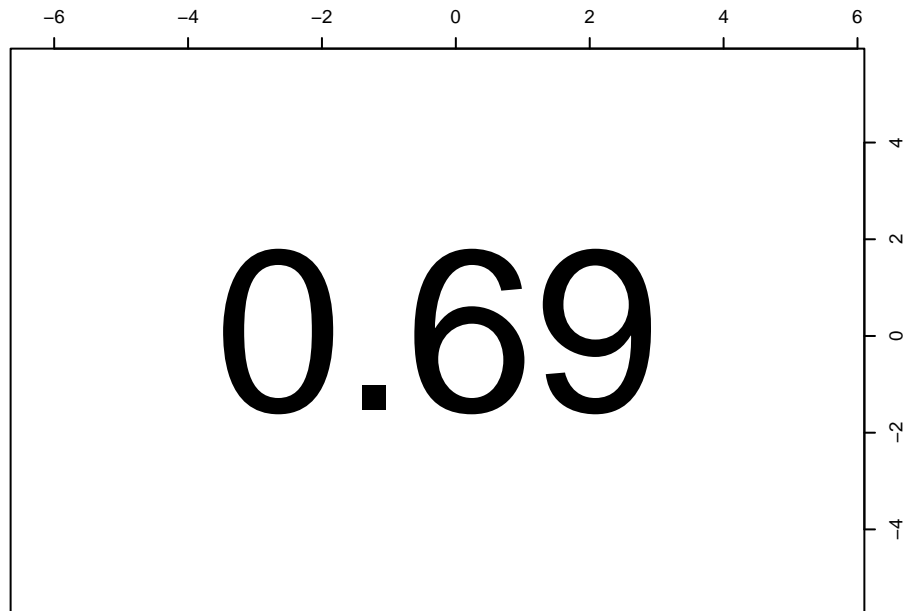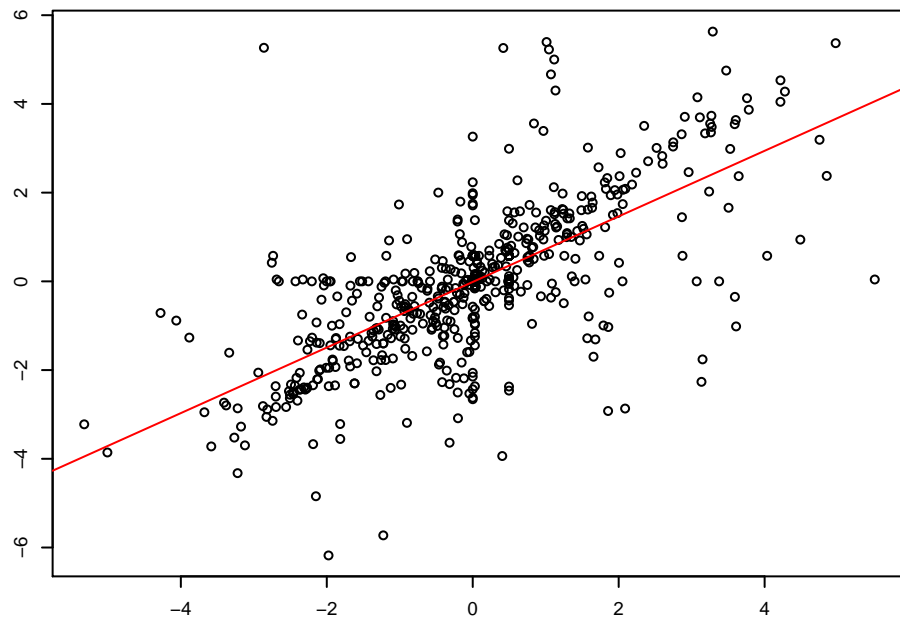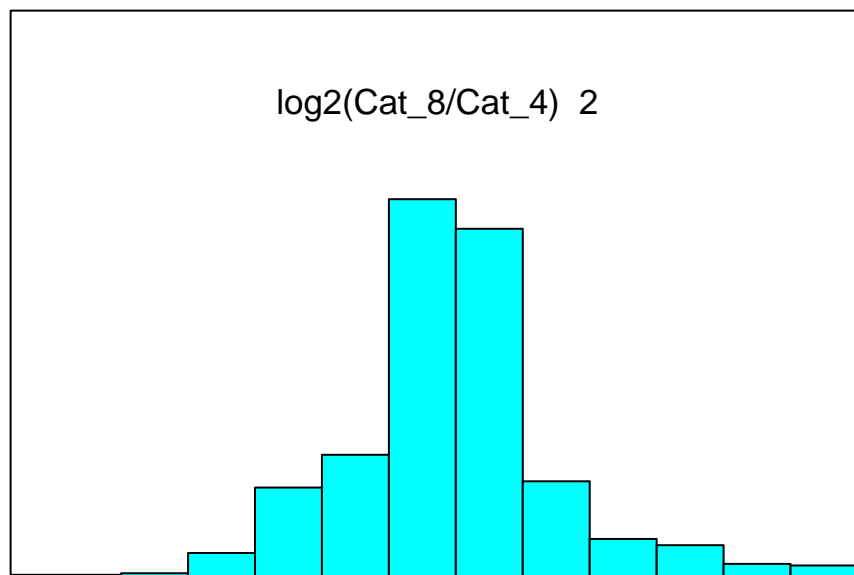

Supplement: supp [file elife-75798-supp-v1.zip]

MA plot

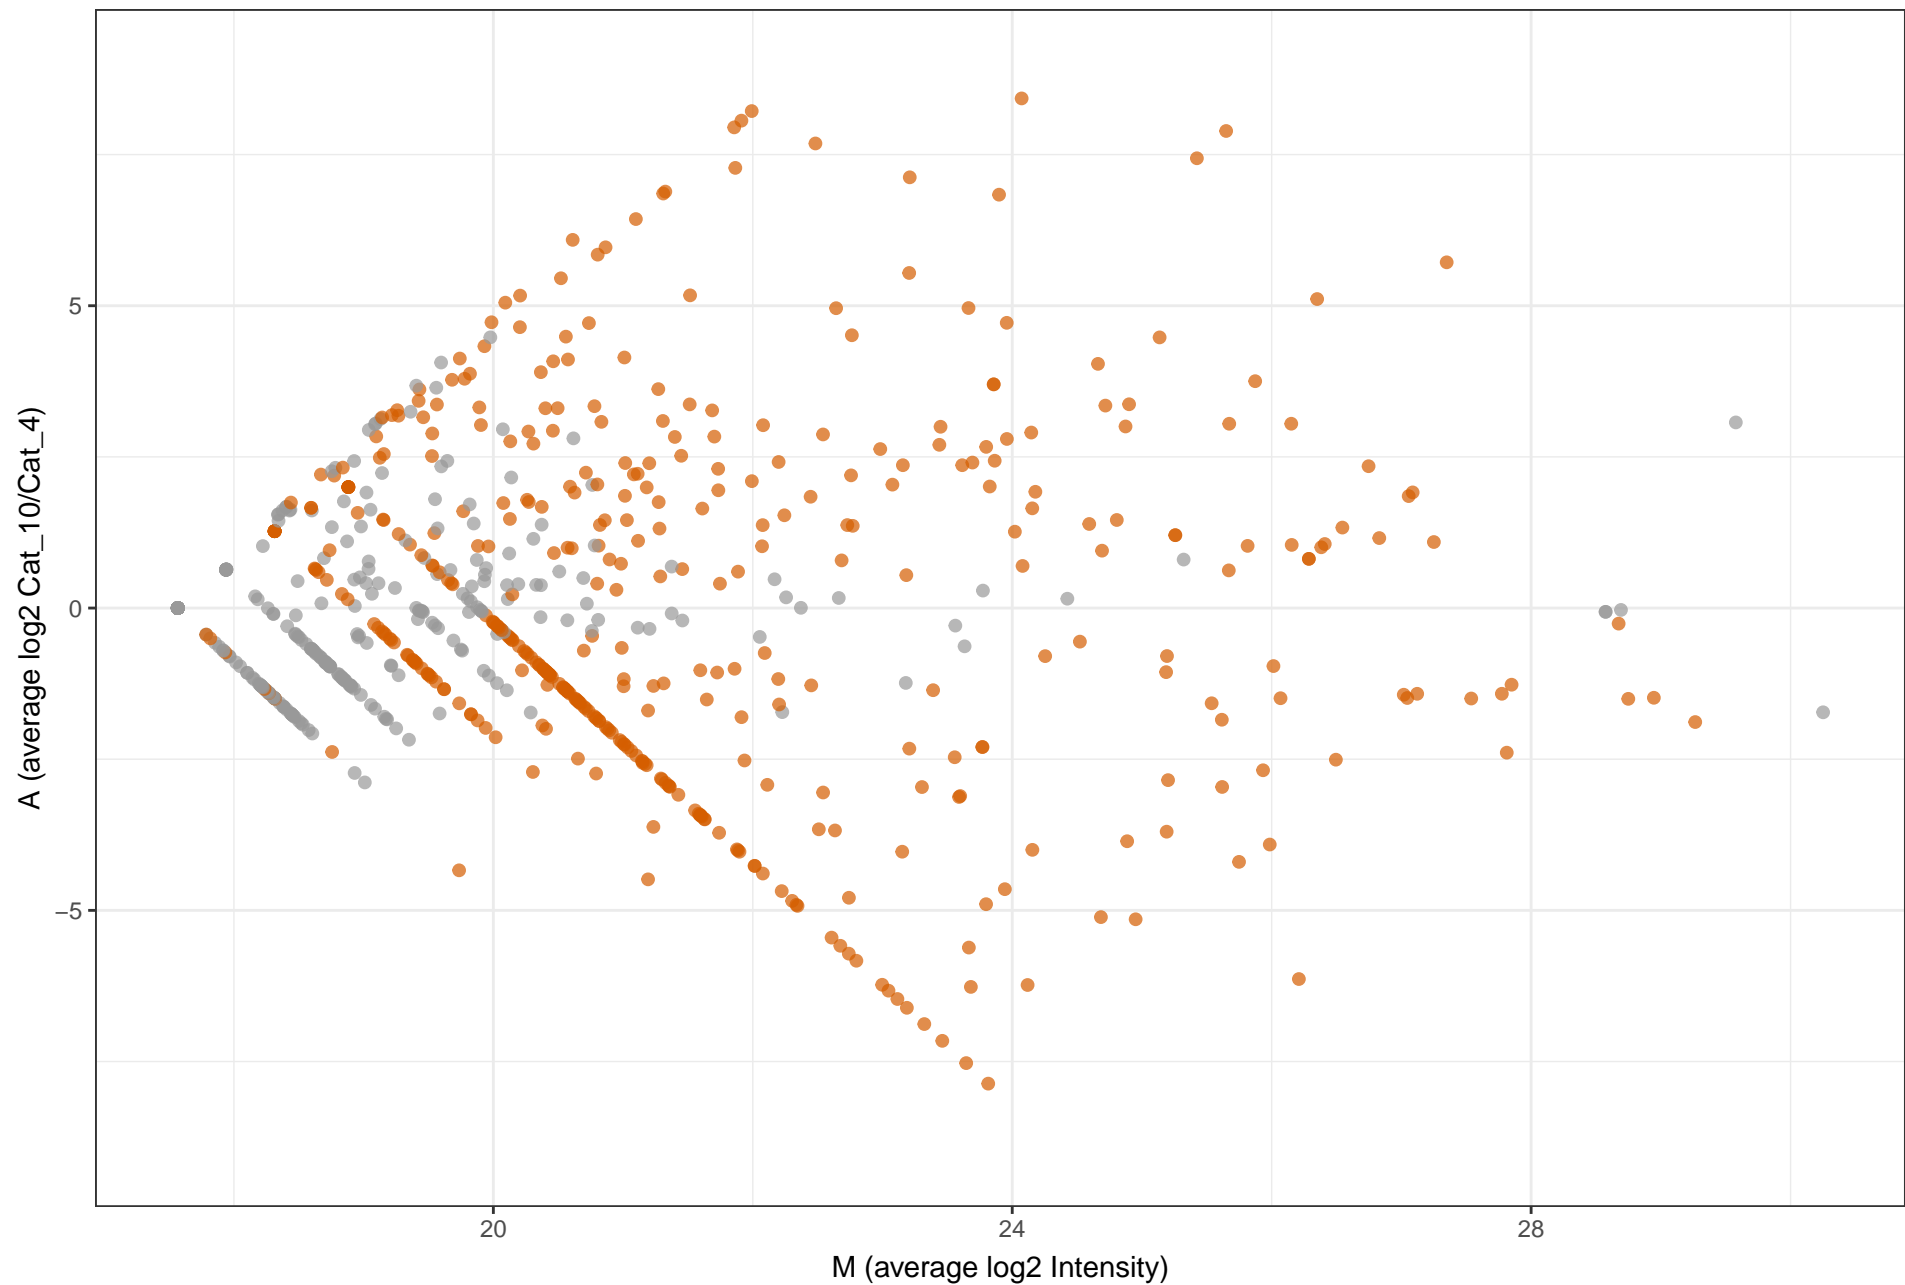

Supplement: supp [file elife-75798-supp-v1.zip]

Value-ordered fold change

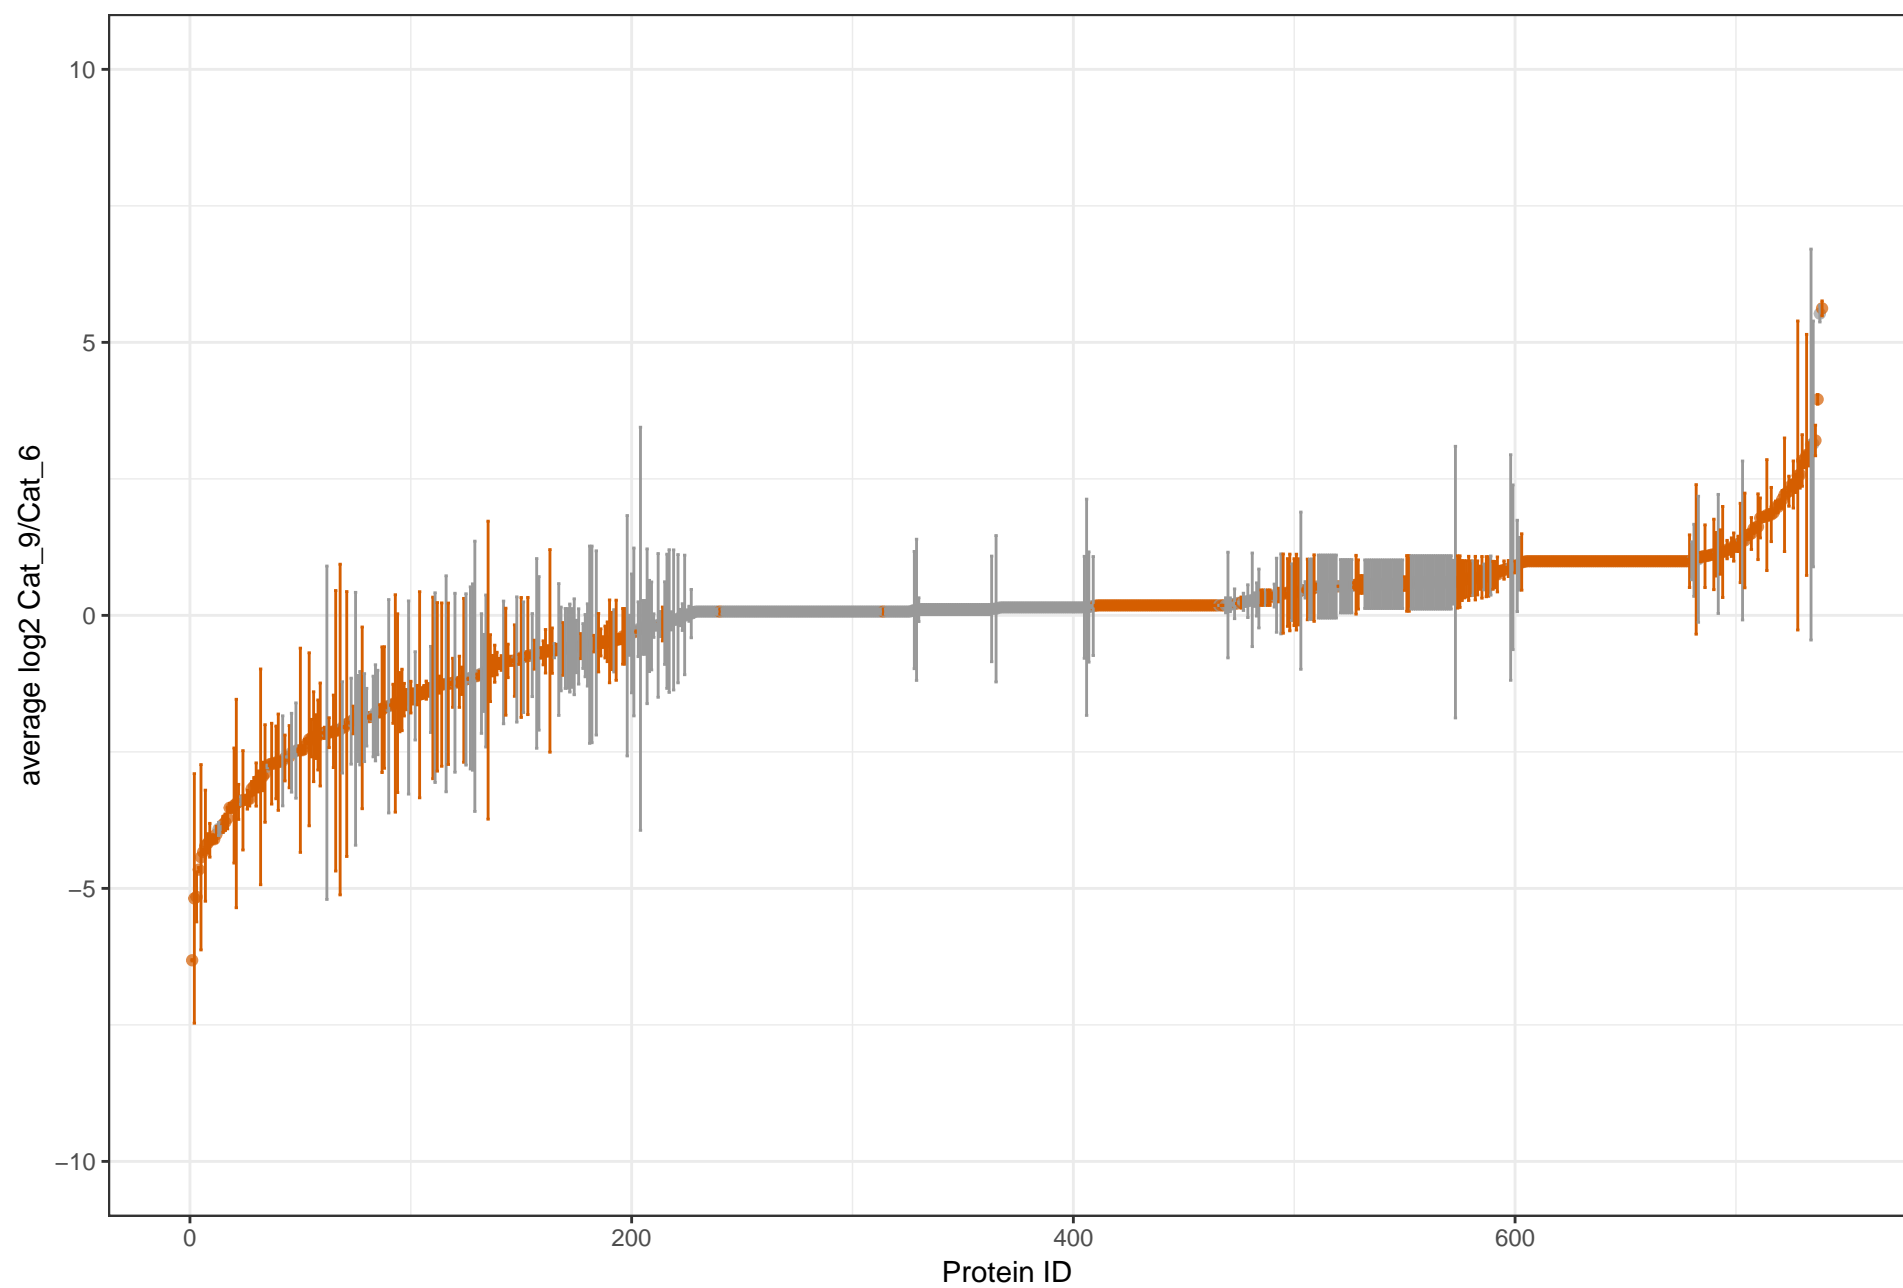

Supplement: supp [file elife-75798-supp-v1.zip]

MA plot

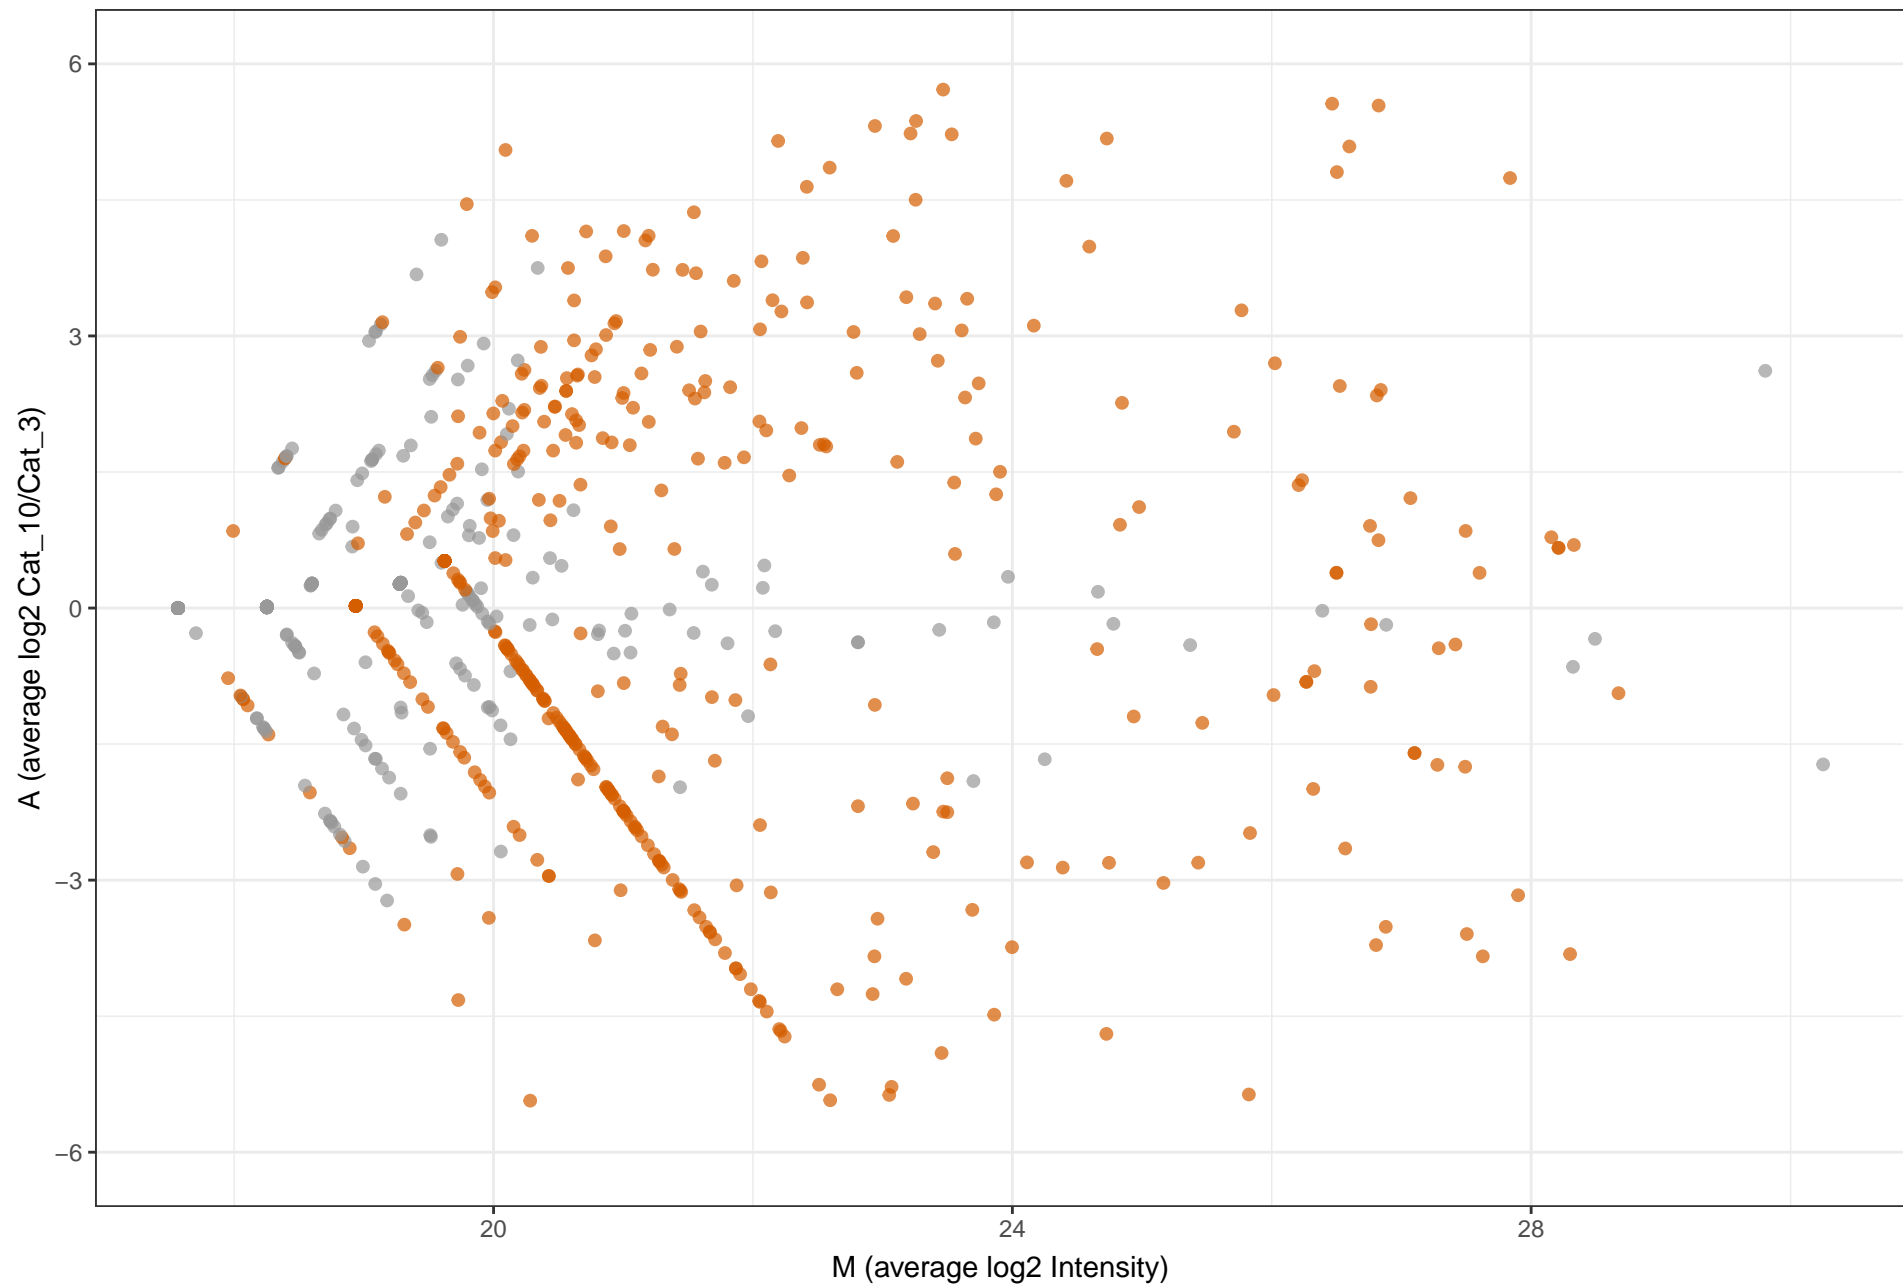

Supplement: supp [file elife-75798-supp-v1.zip]

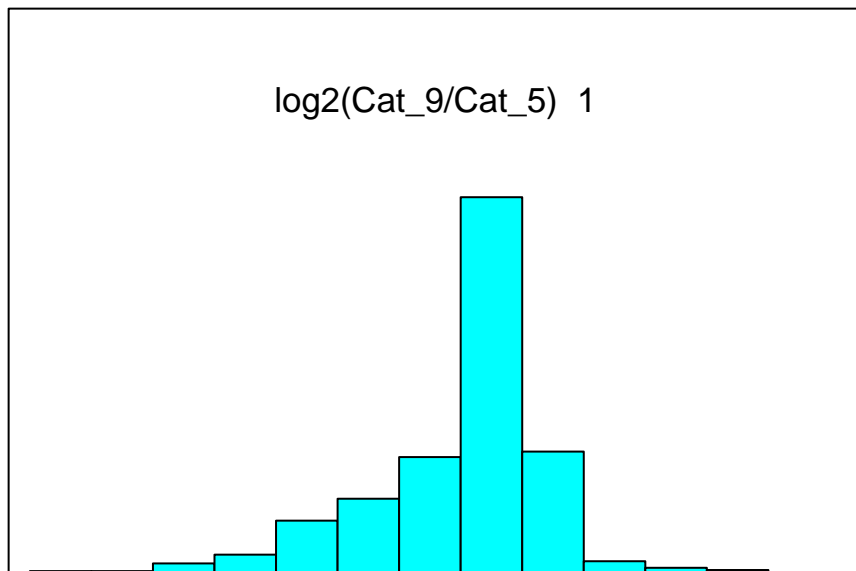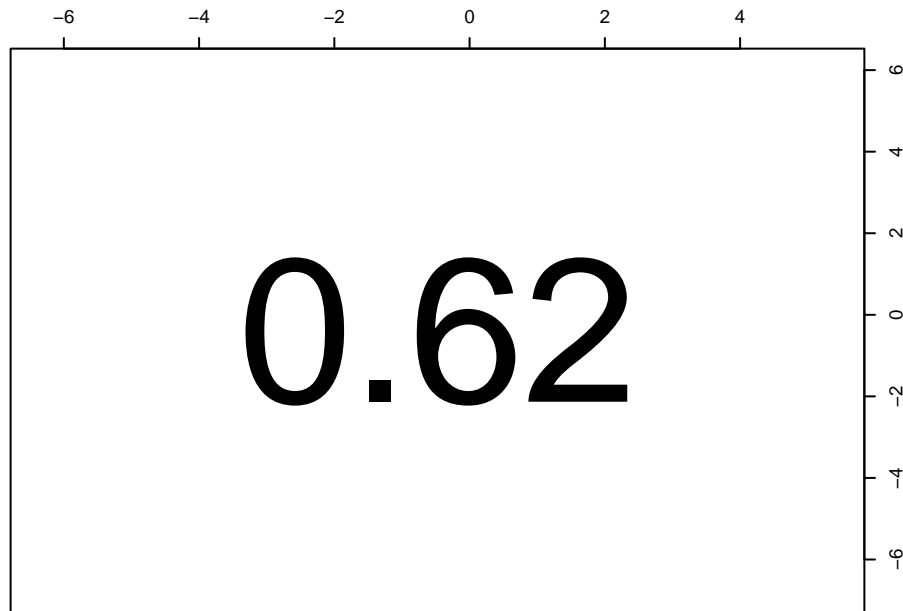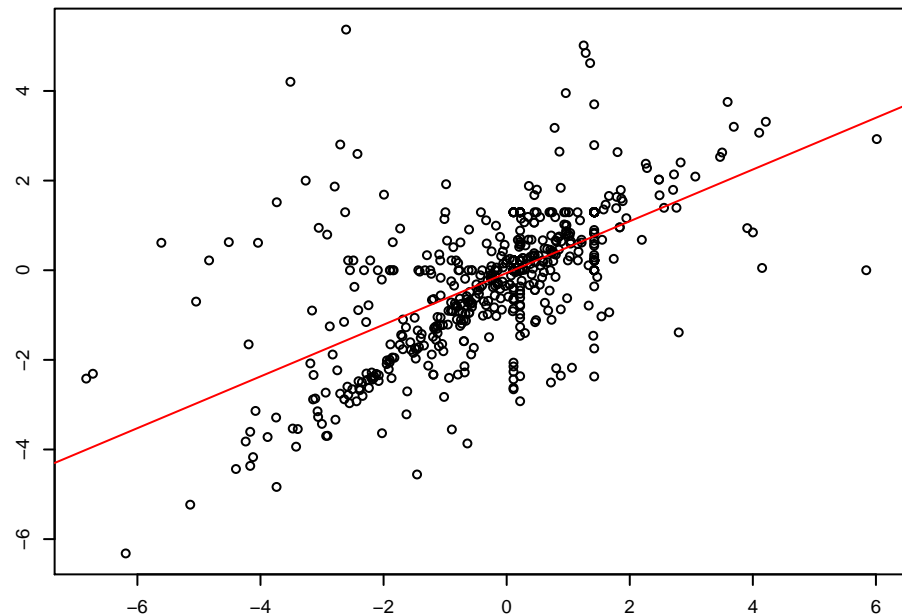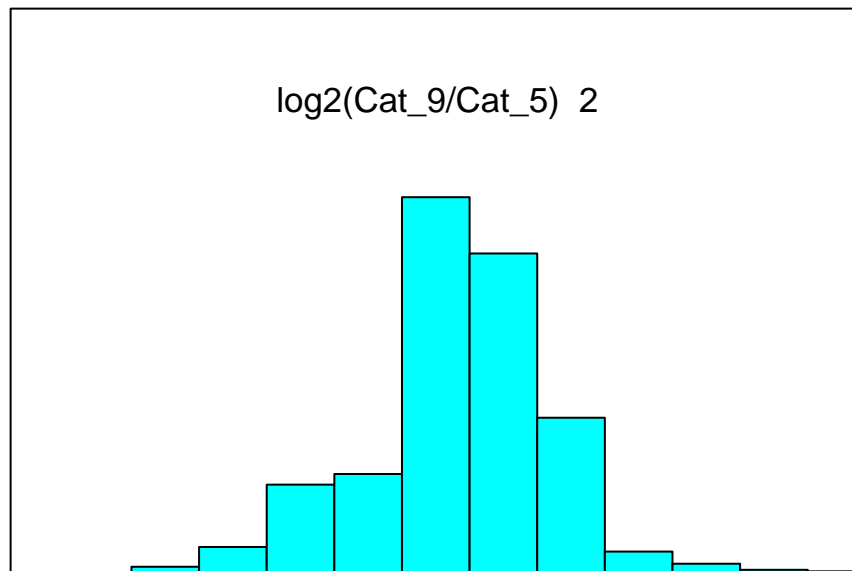

Supplement: supp [file elife-75798-supp-v1.zip]

## P-value vs Fold change

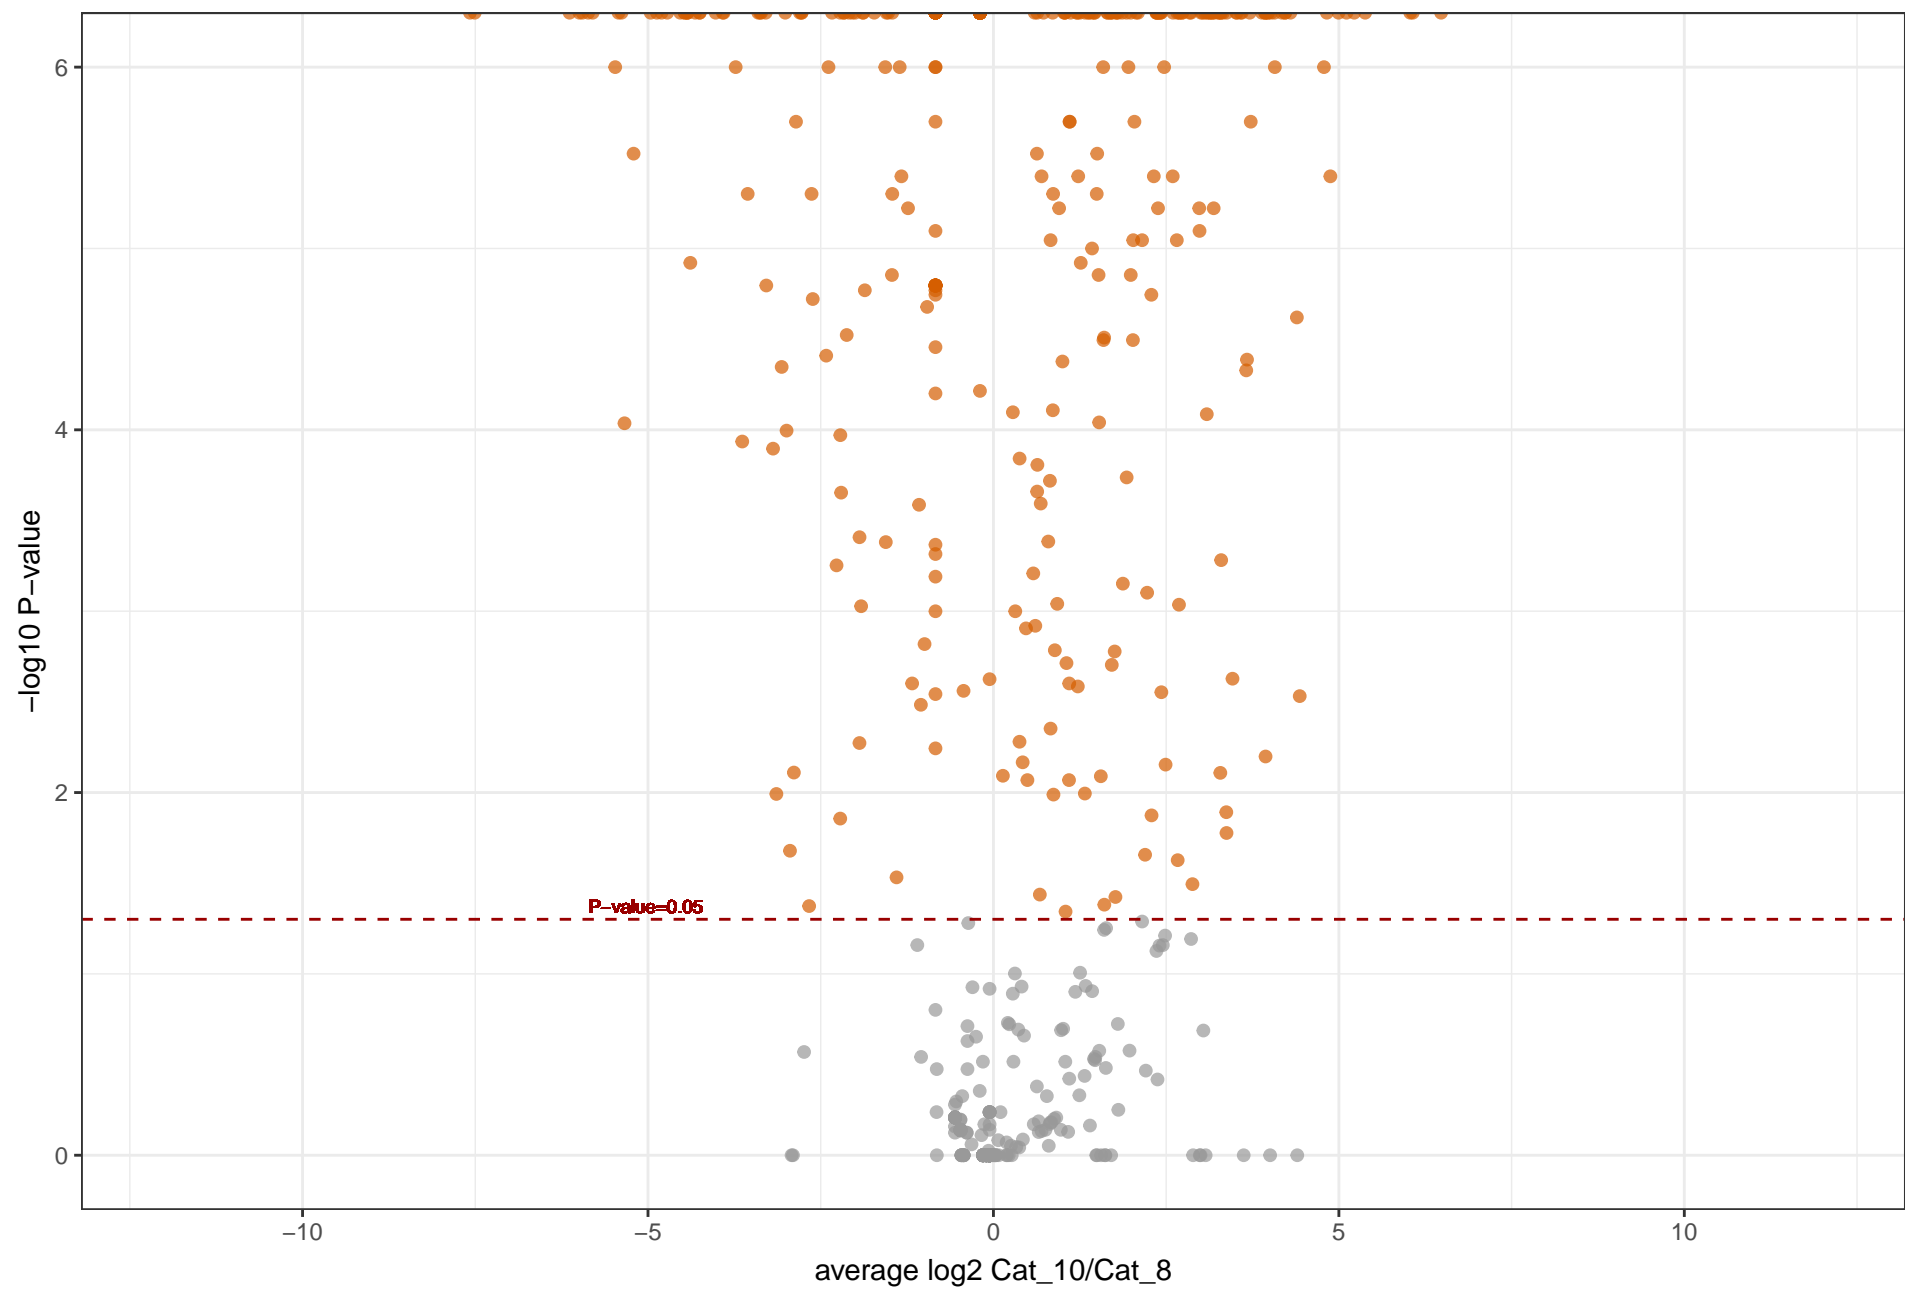

Supplement: supp [file elife-75798-supp-v1.zip]

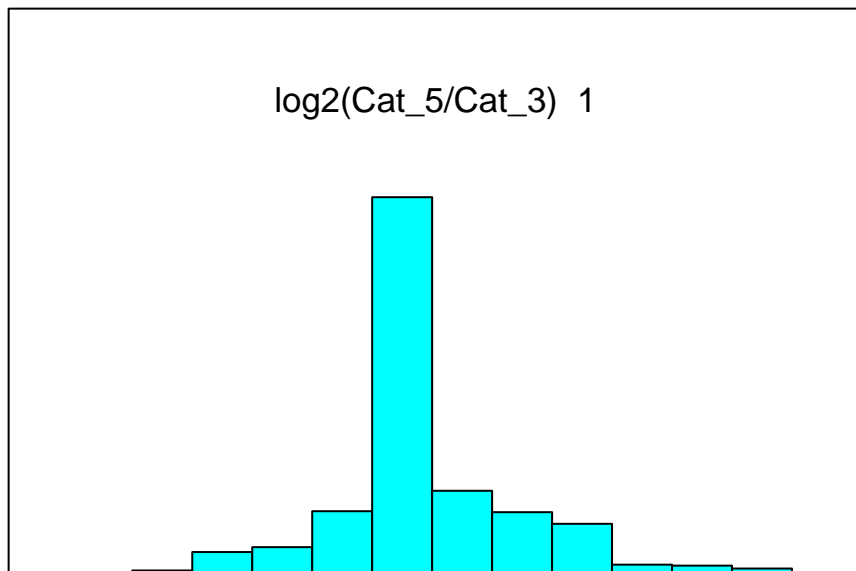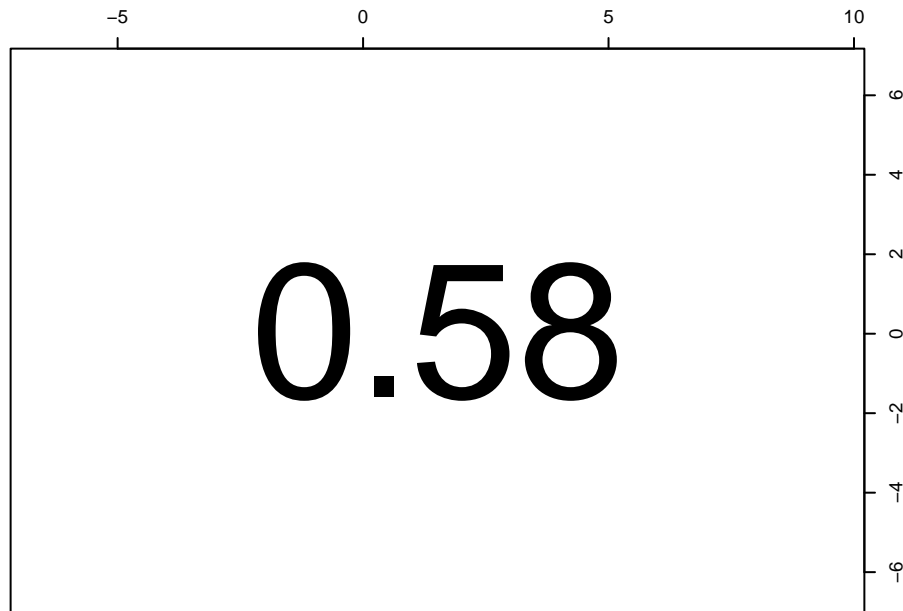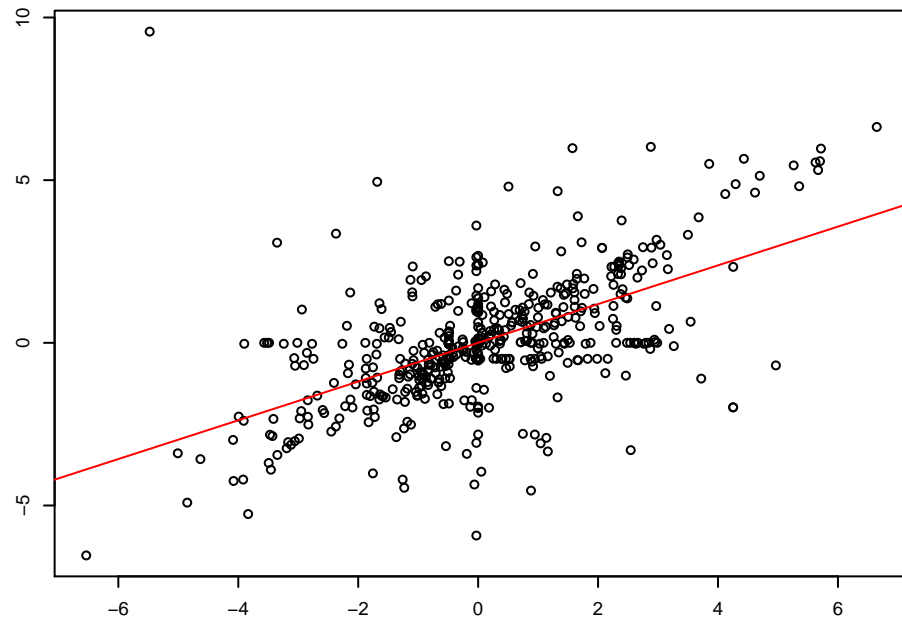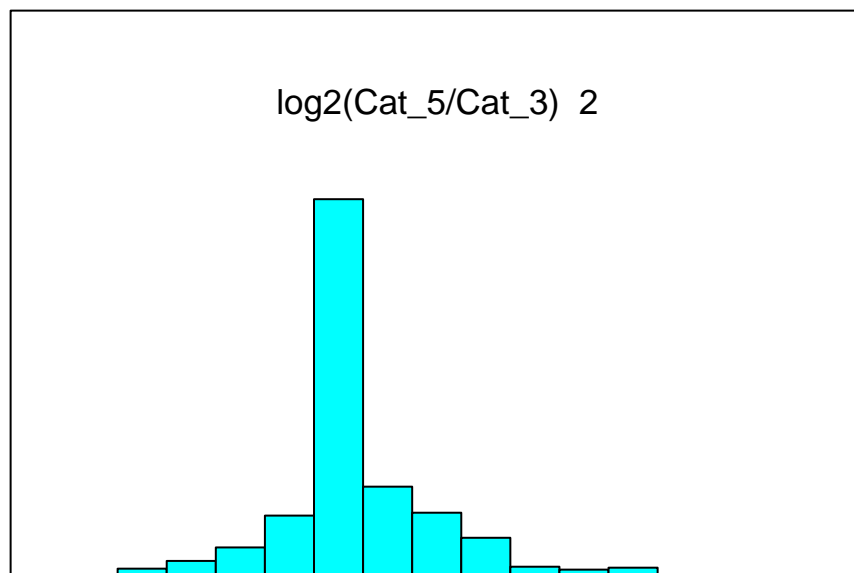

Supplement: supp [file elife-75798-supp-v1.zip]

**P-value vs Fold change**

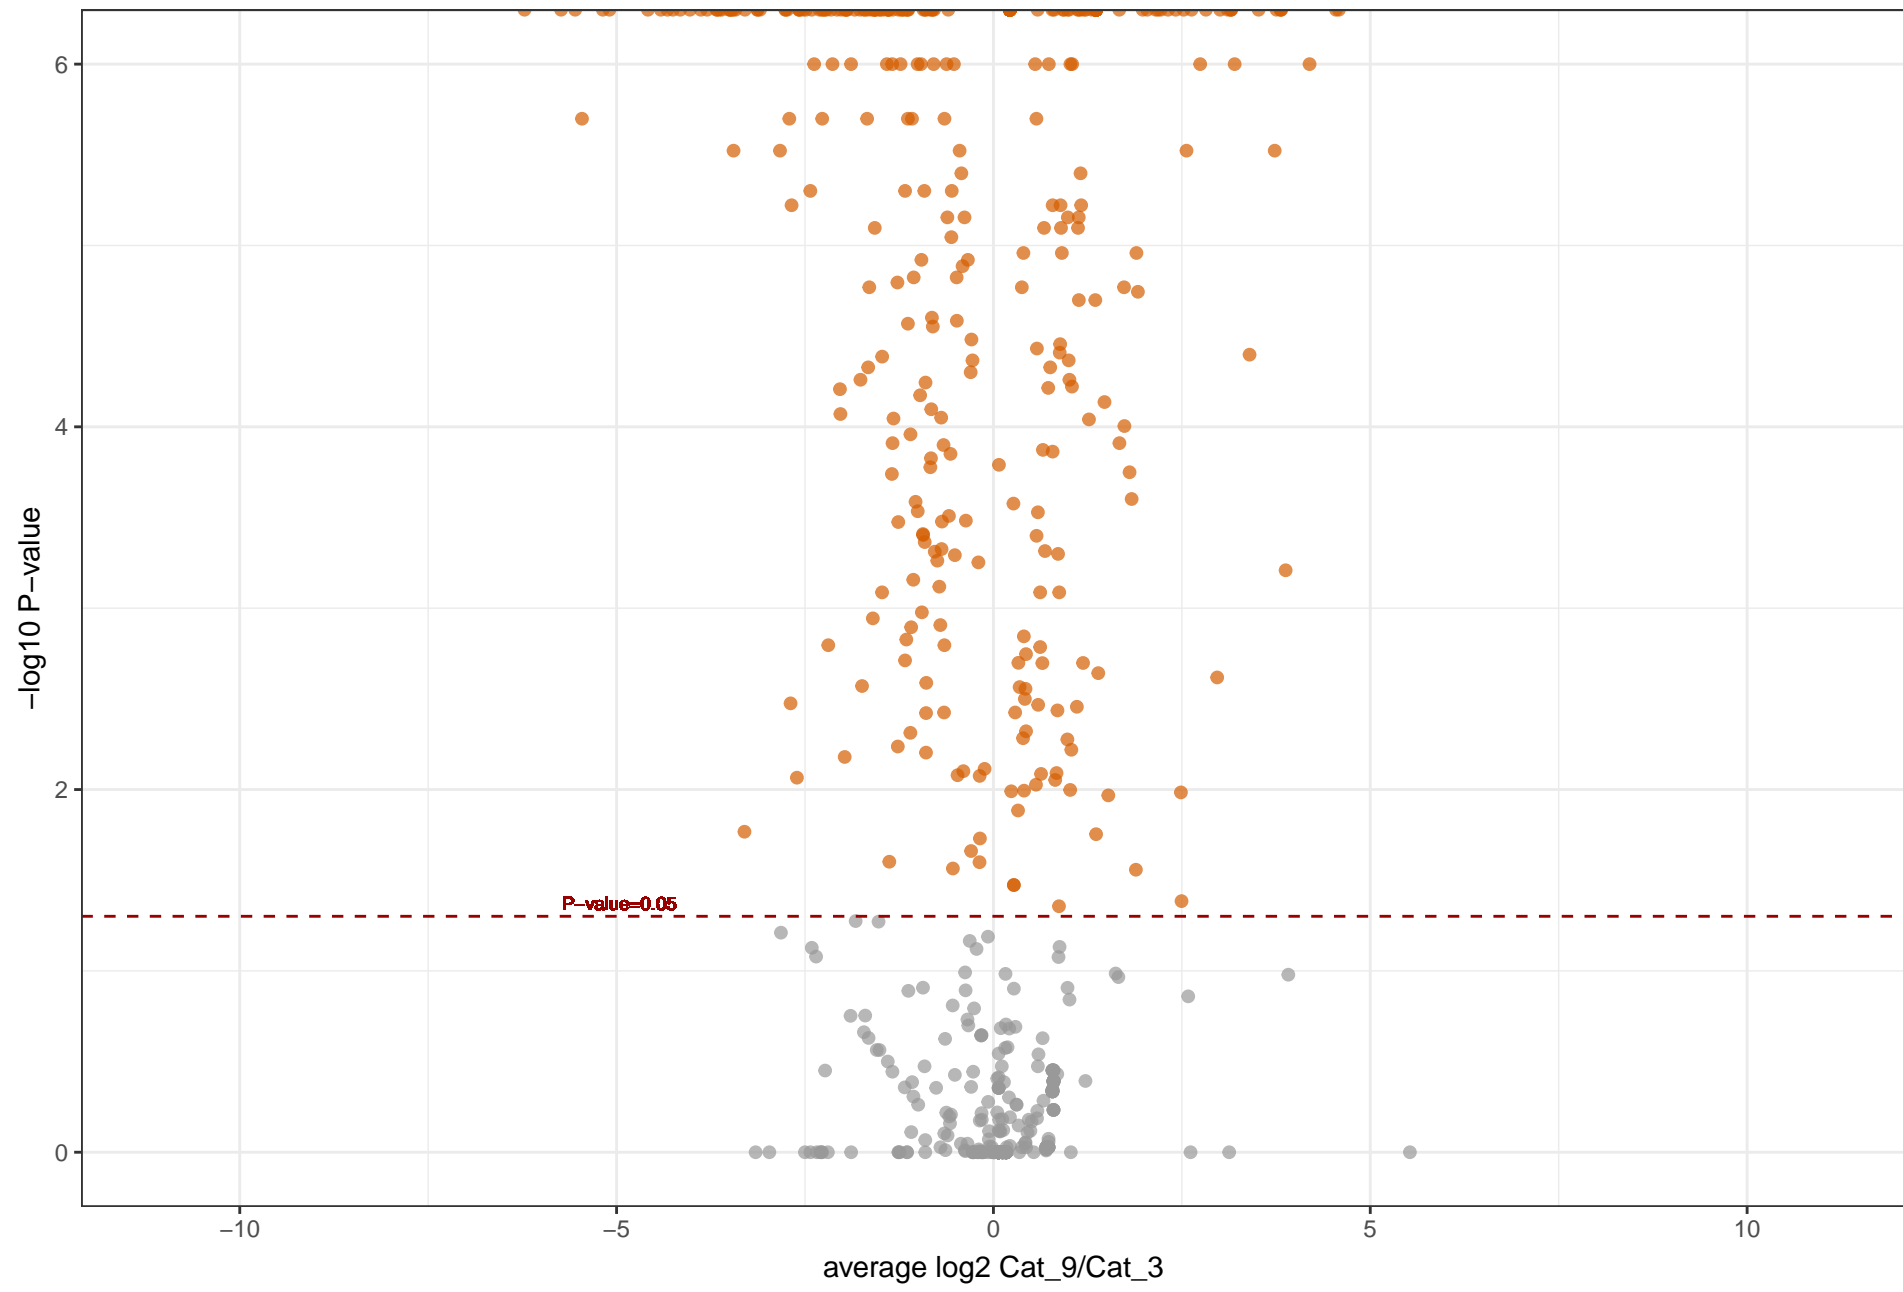

Supplement: supp [file elife-75798-supp-v1.zip]

P-value vs Fold change

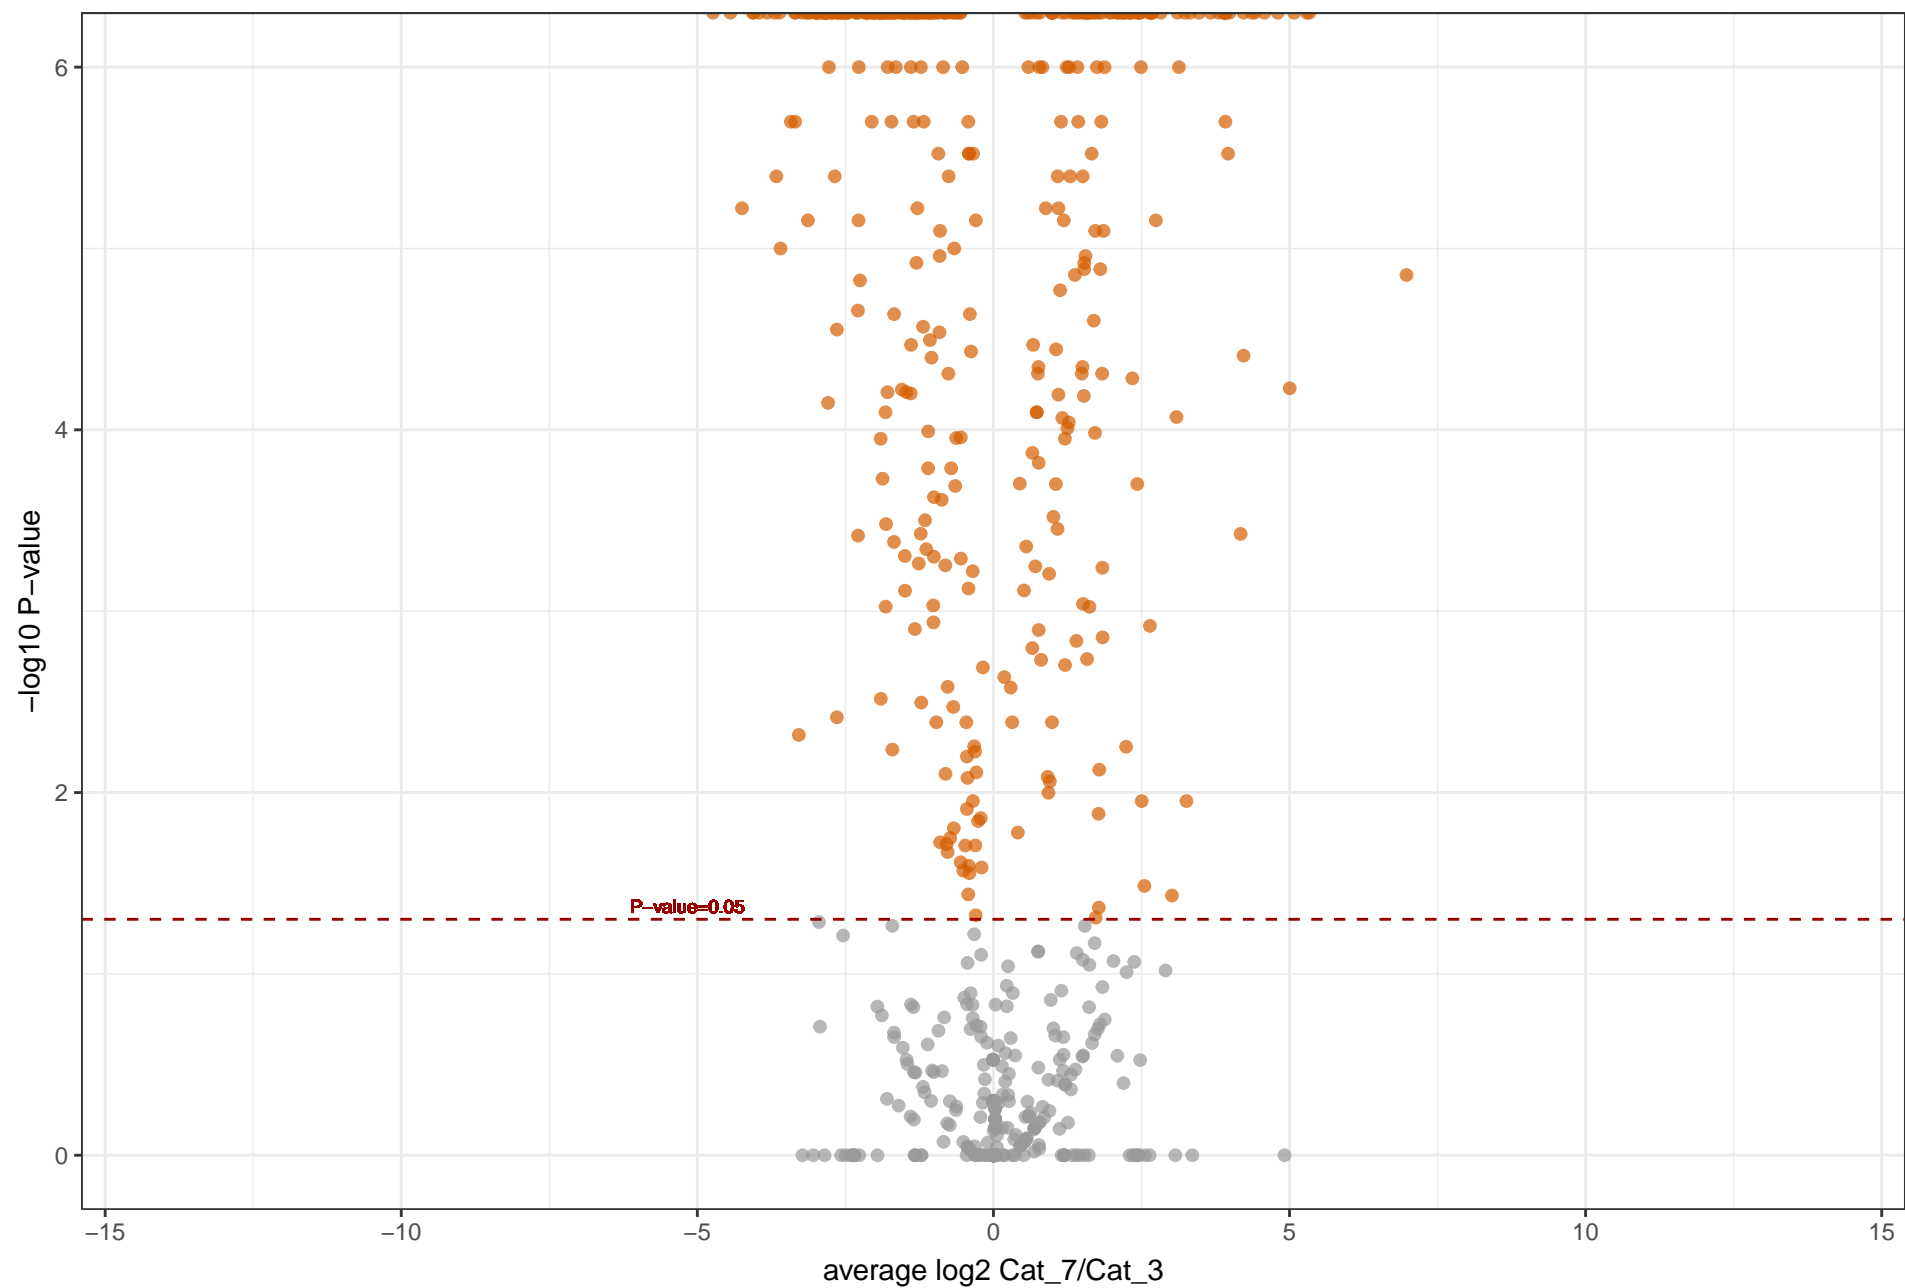

Supplement: supp [file elife-75798-supp-v1.zip]

**P-value vs Fold change**

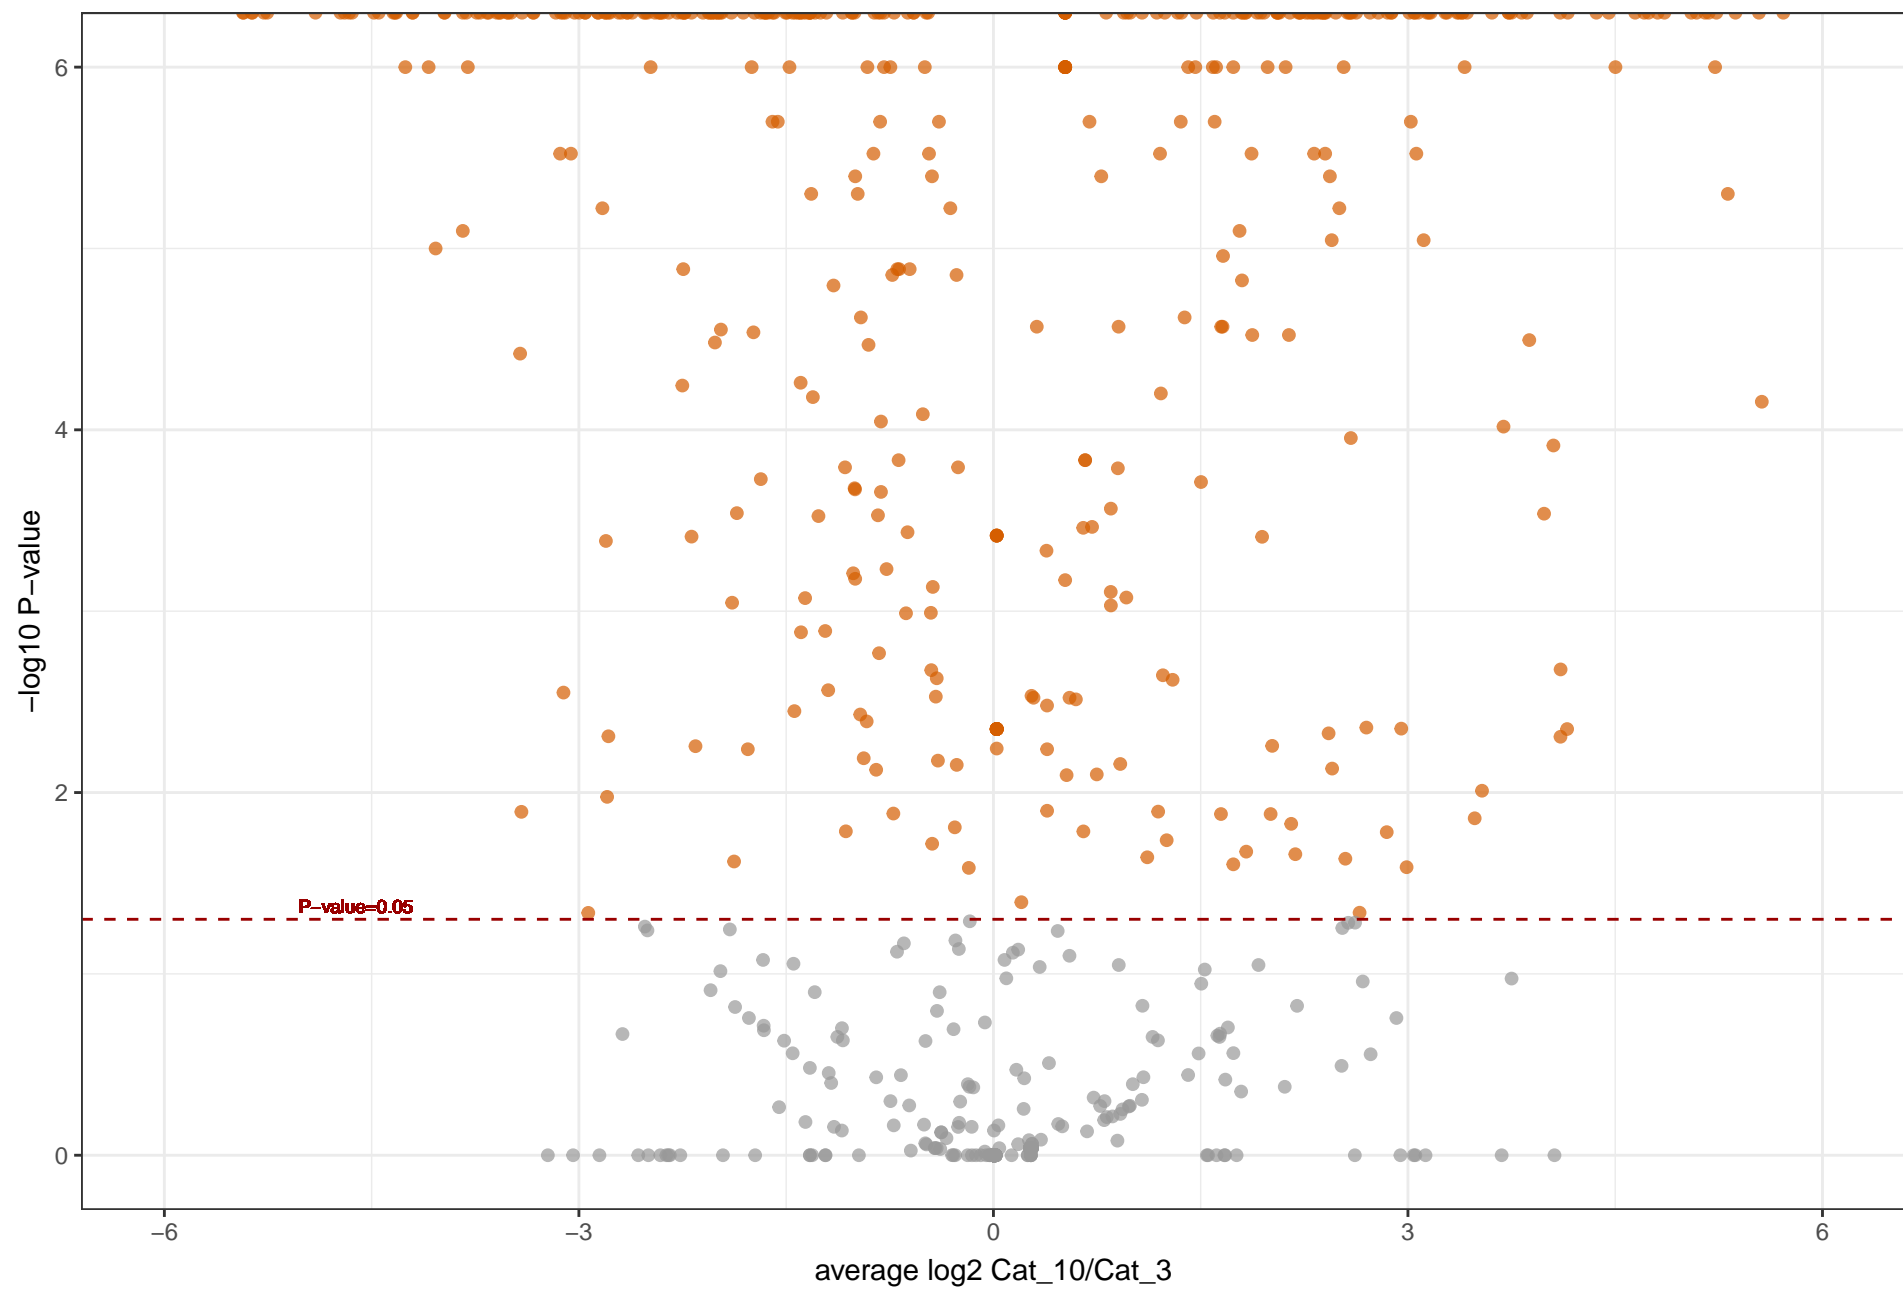

Supplement: supp [file elife-75798-supp-v1.zip]

P-value vs Fold change

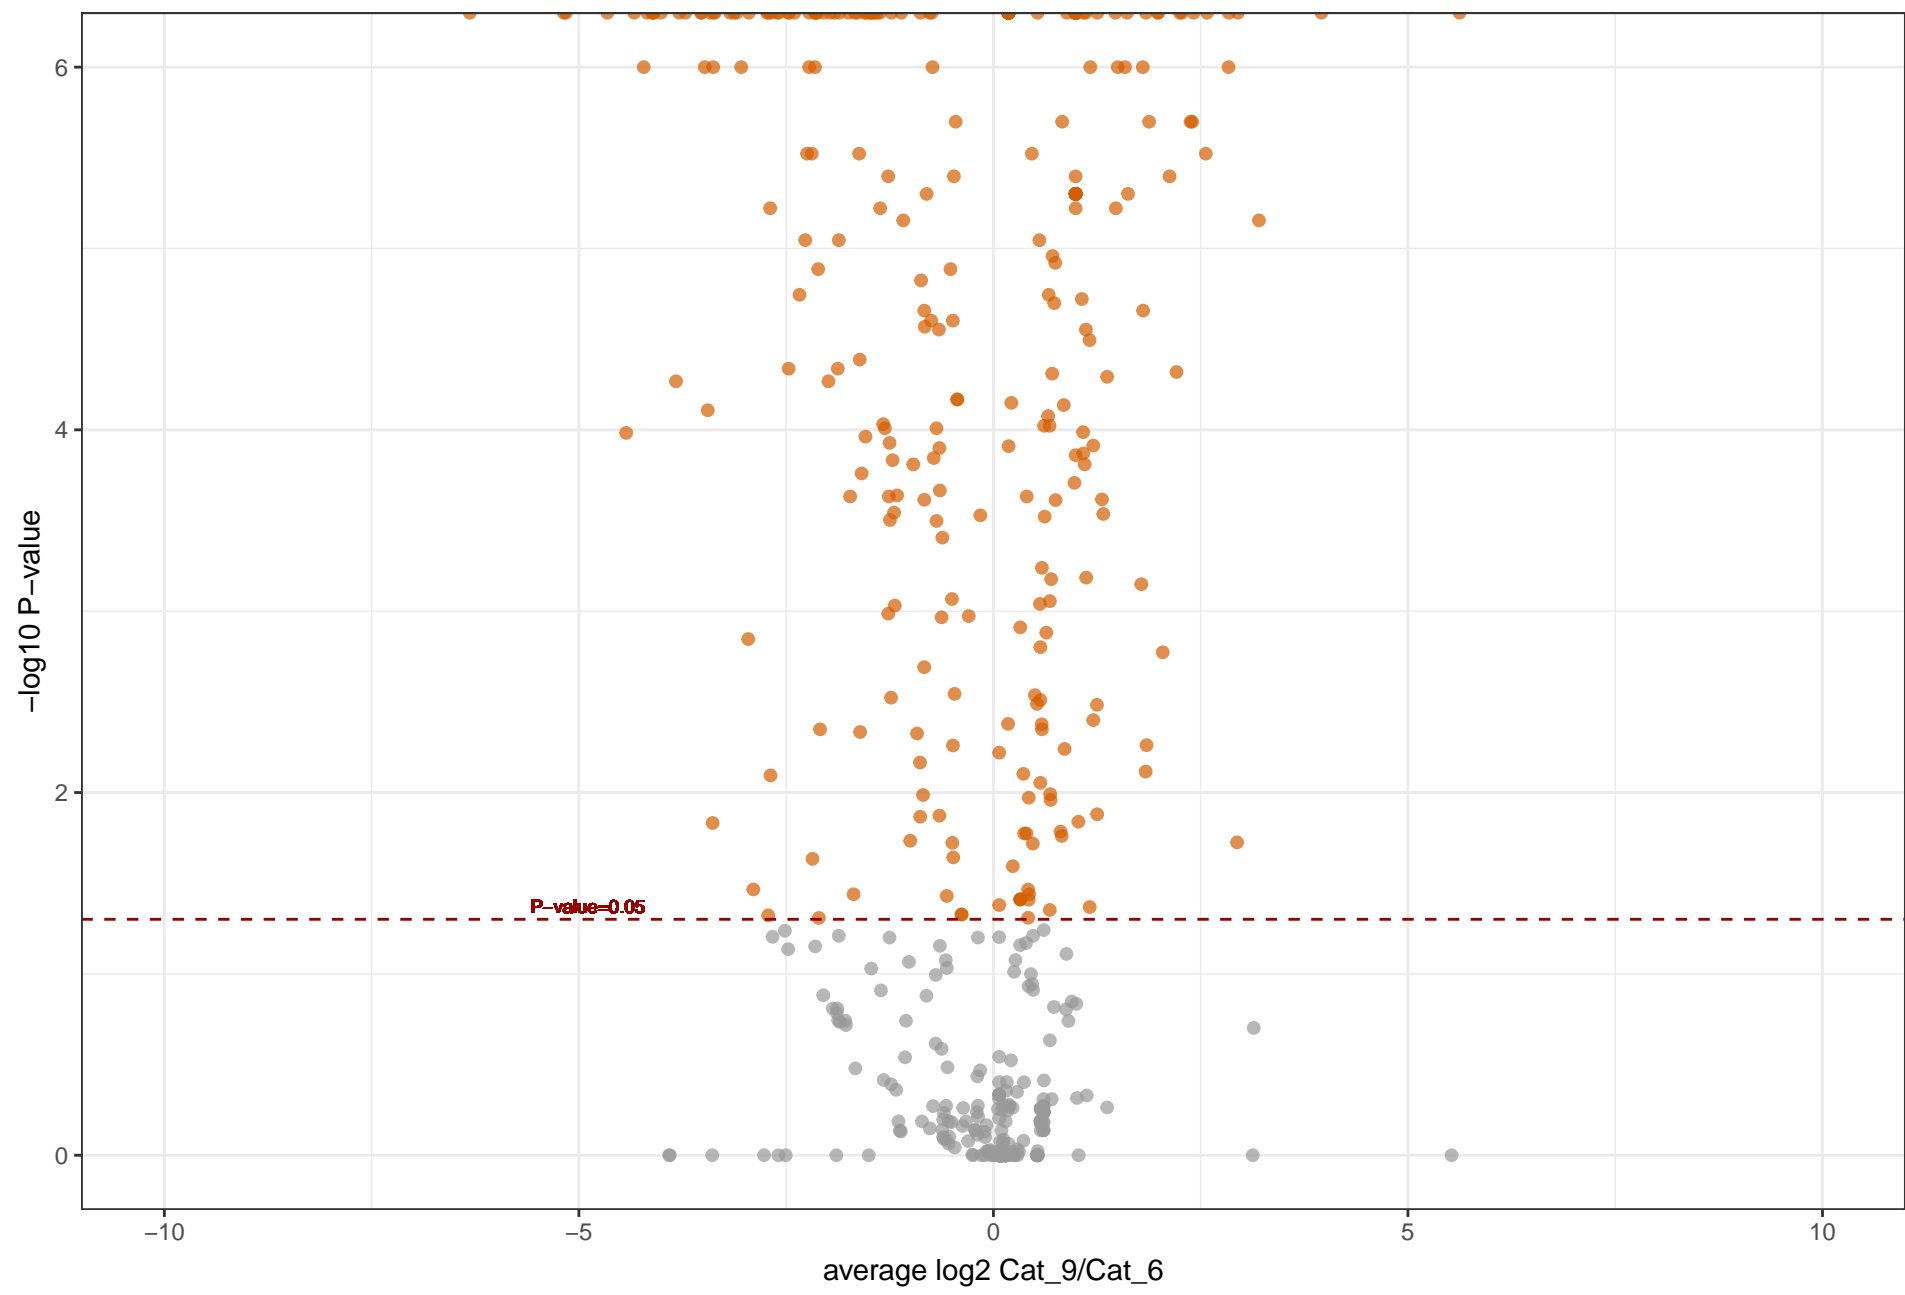

Supplement: supp [file elife-75798-supp-v1.zip]

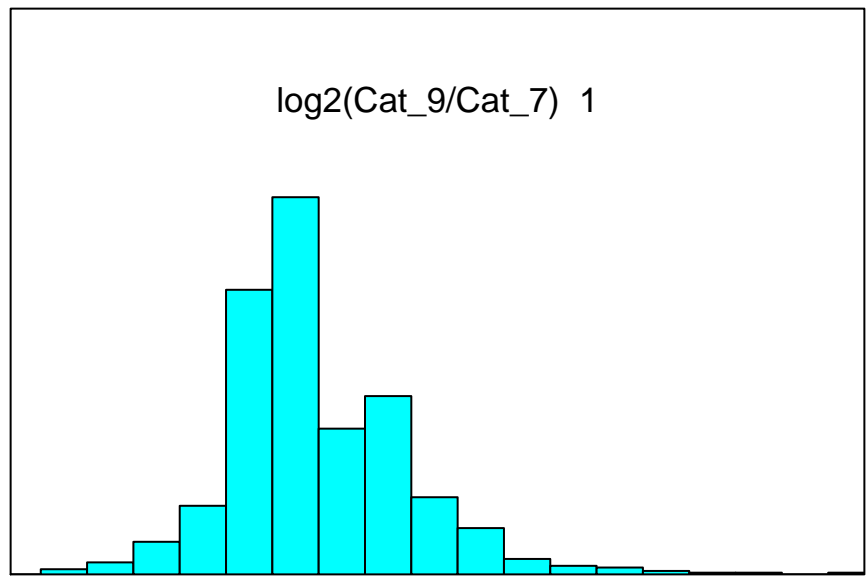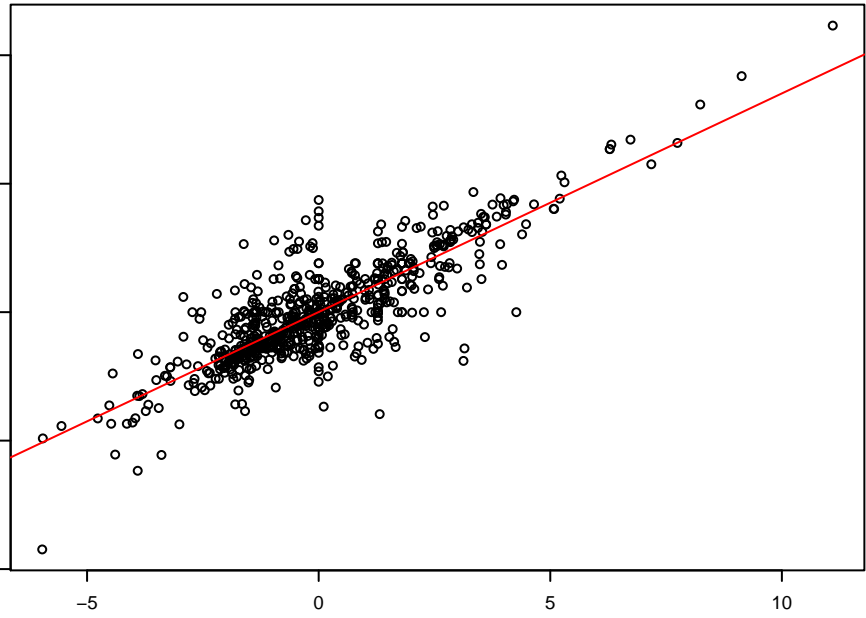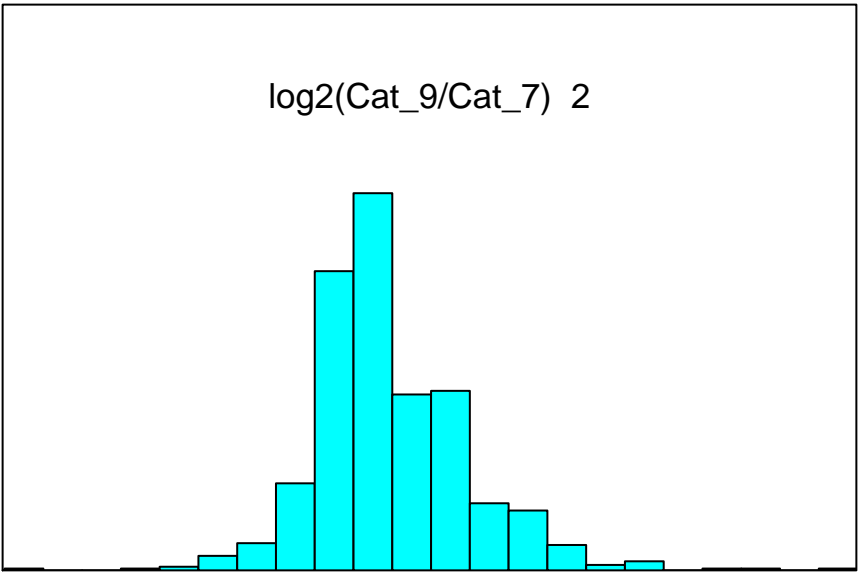

Supplement: supp [file elife-75798-supp-v1.zip]

**P-value vs Fold change**

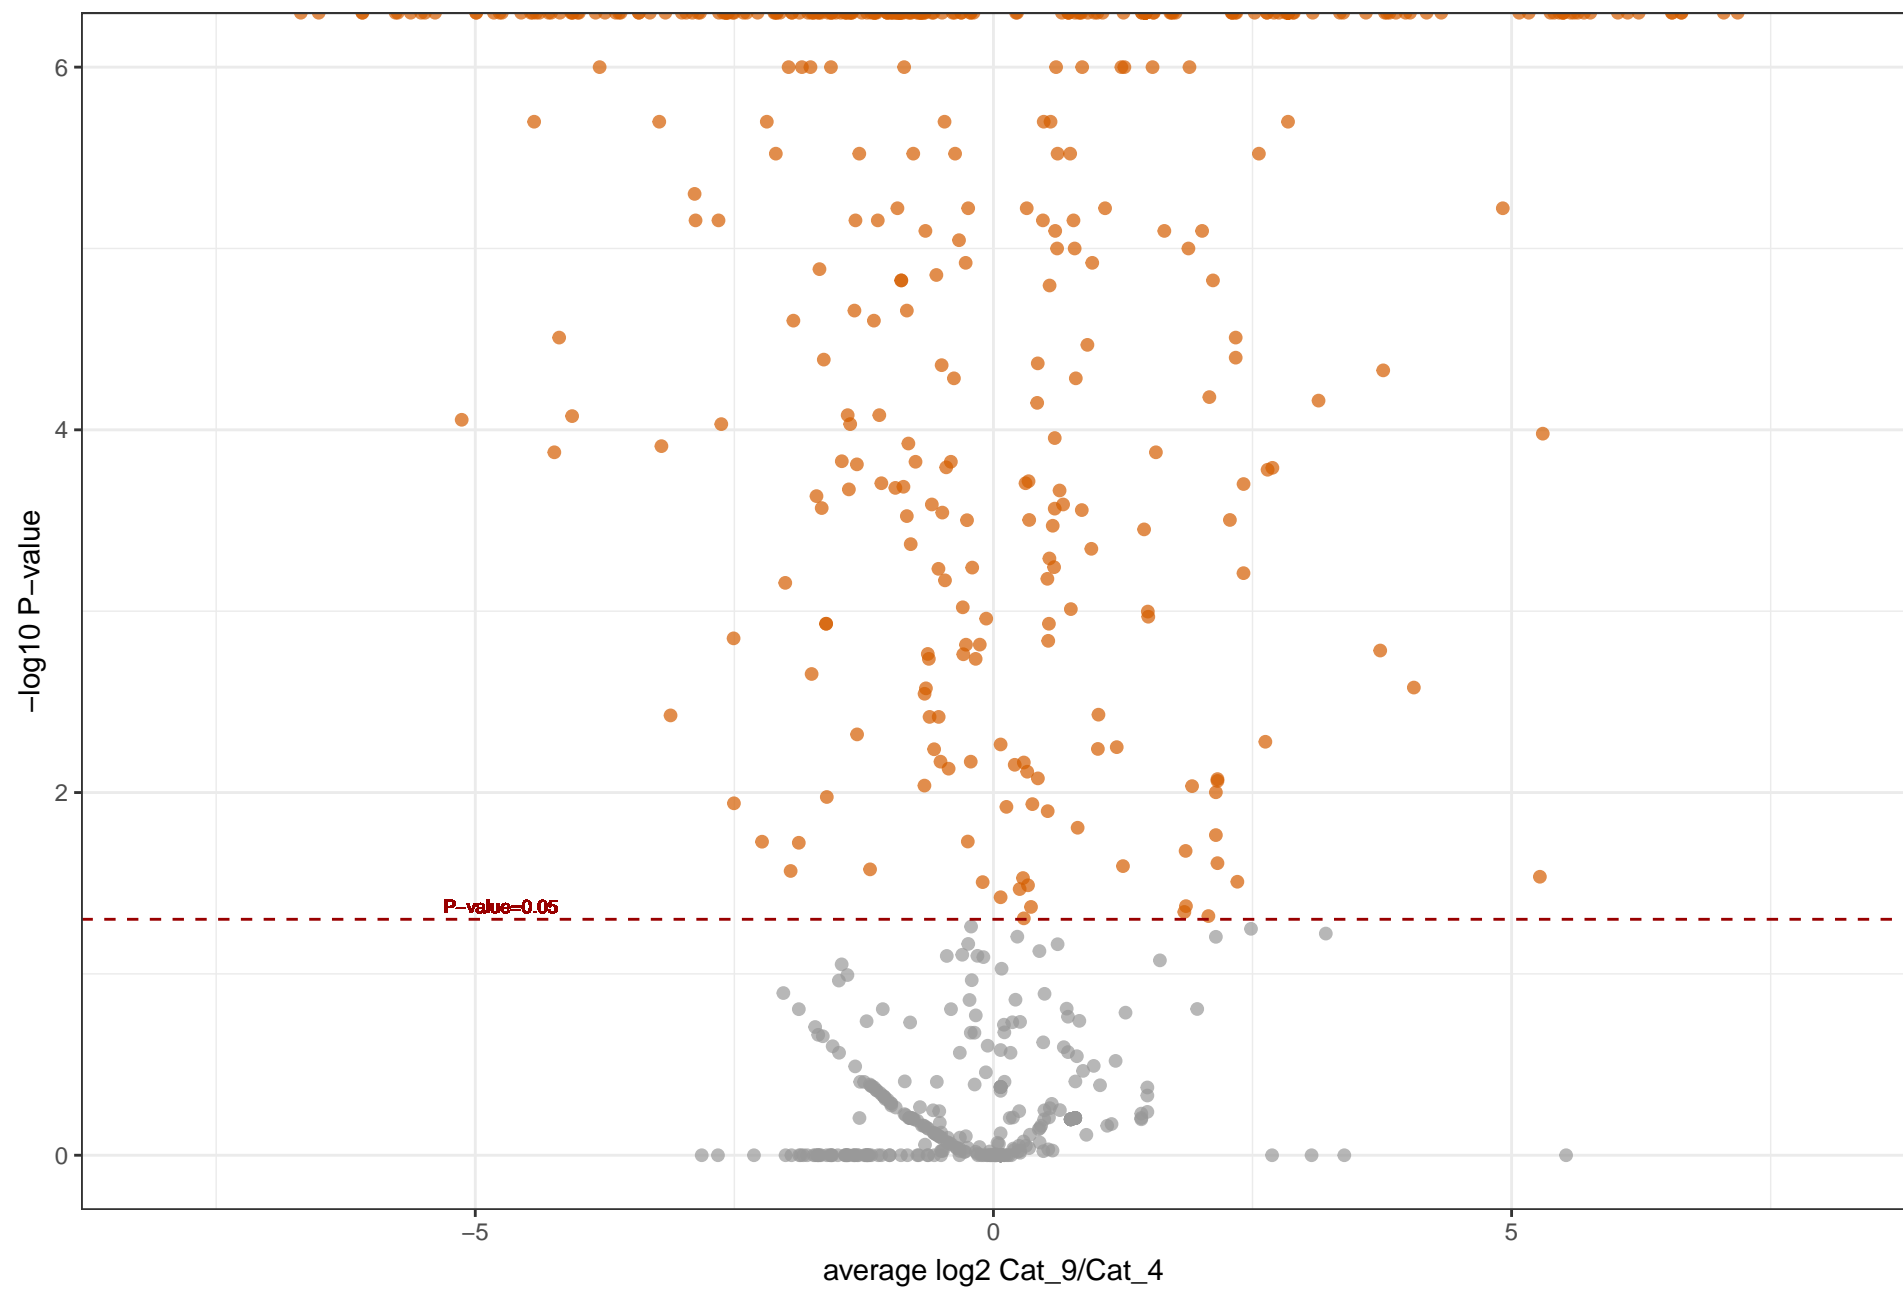

Supplement: supp [file elife-75798-supp-v1.zip]

Value-ordered fold change

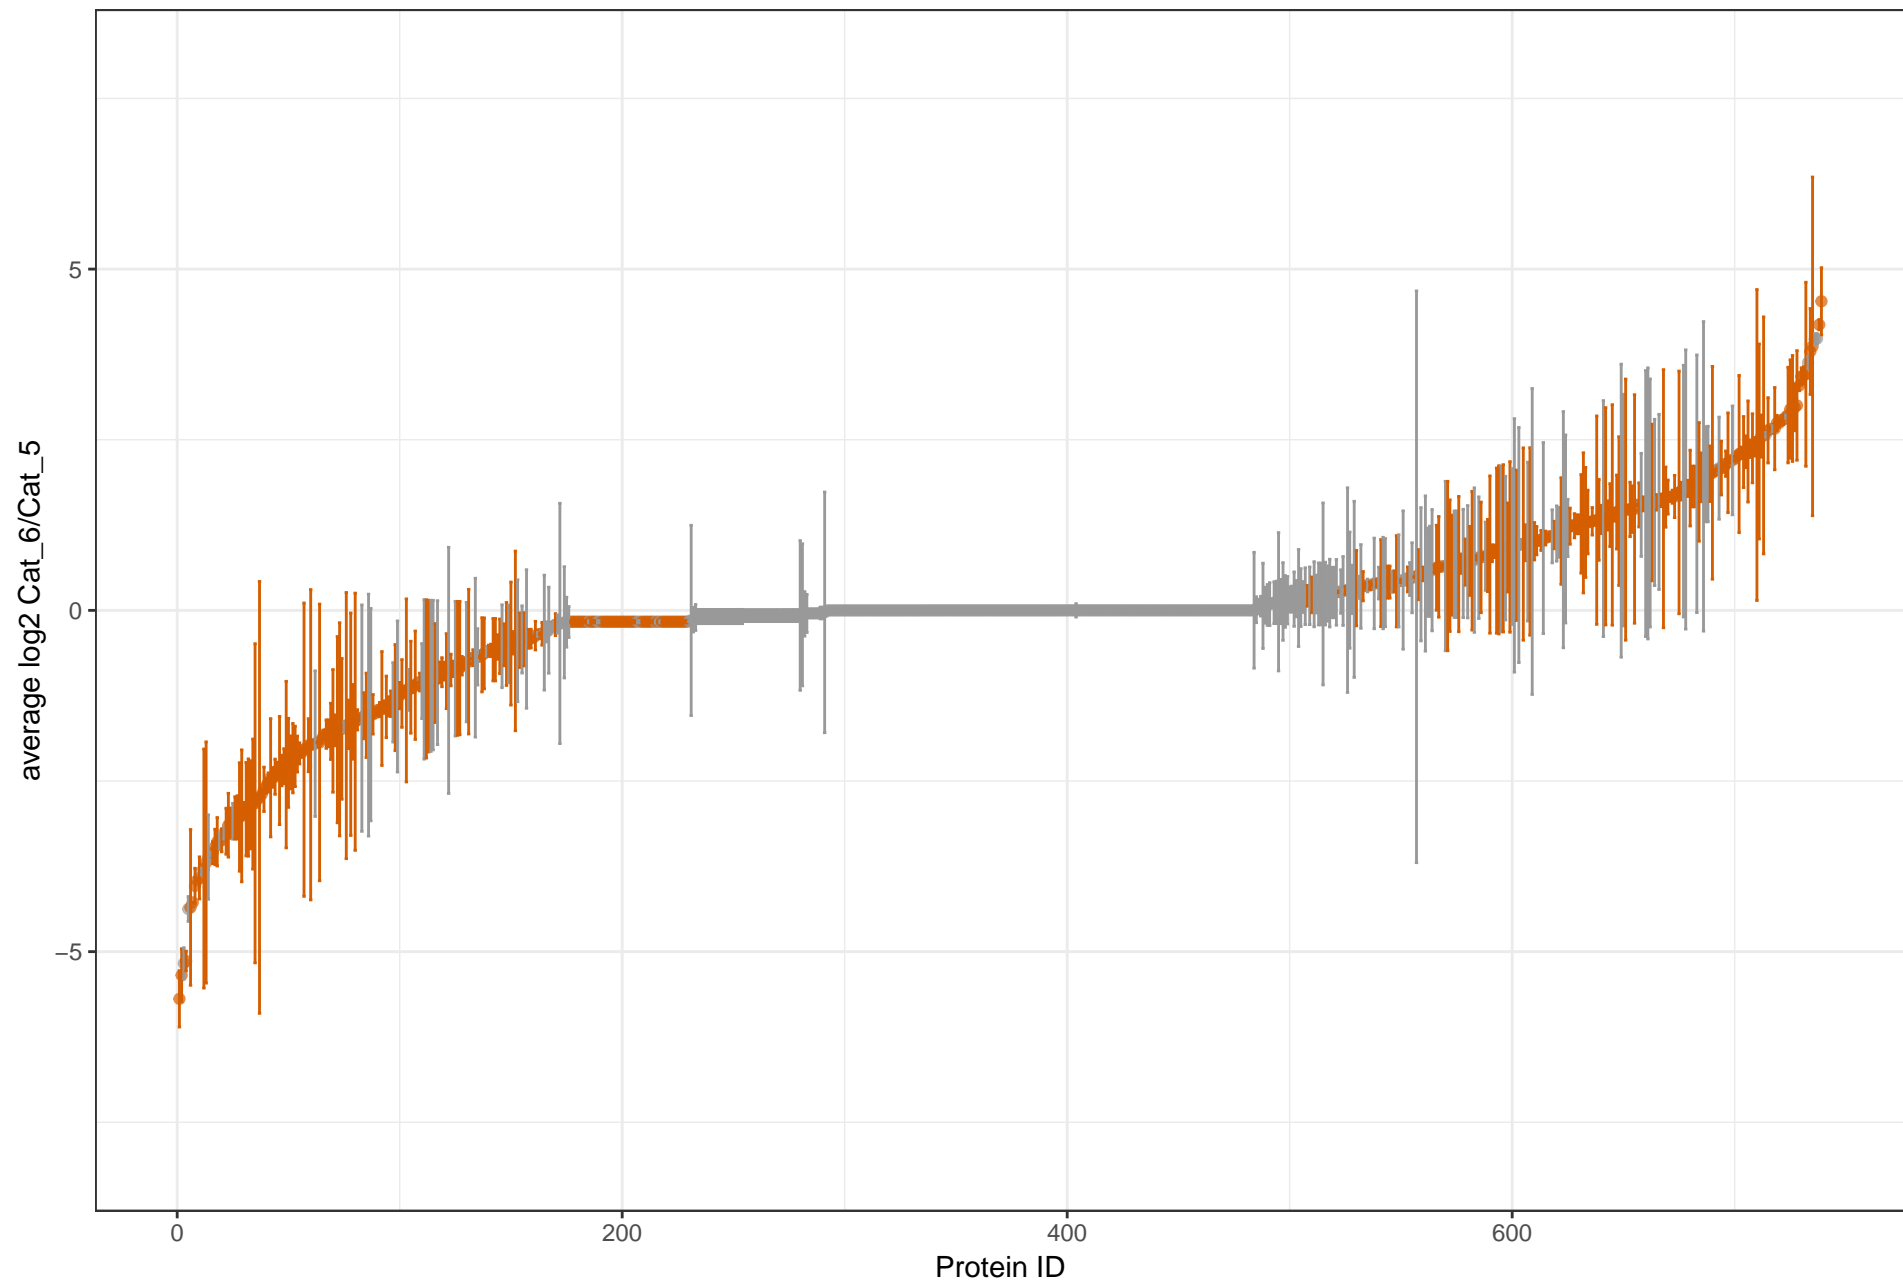

Supplement: supp [file elife-75798-supp-v1.zip]

P-value vs Fold change

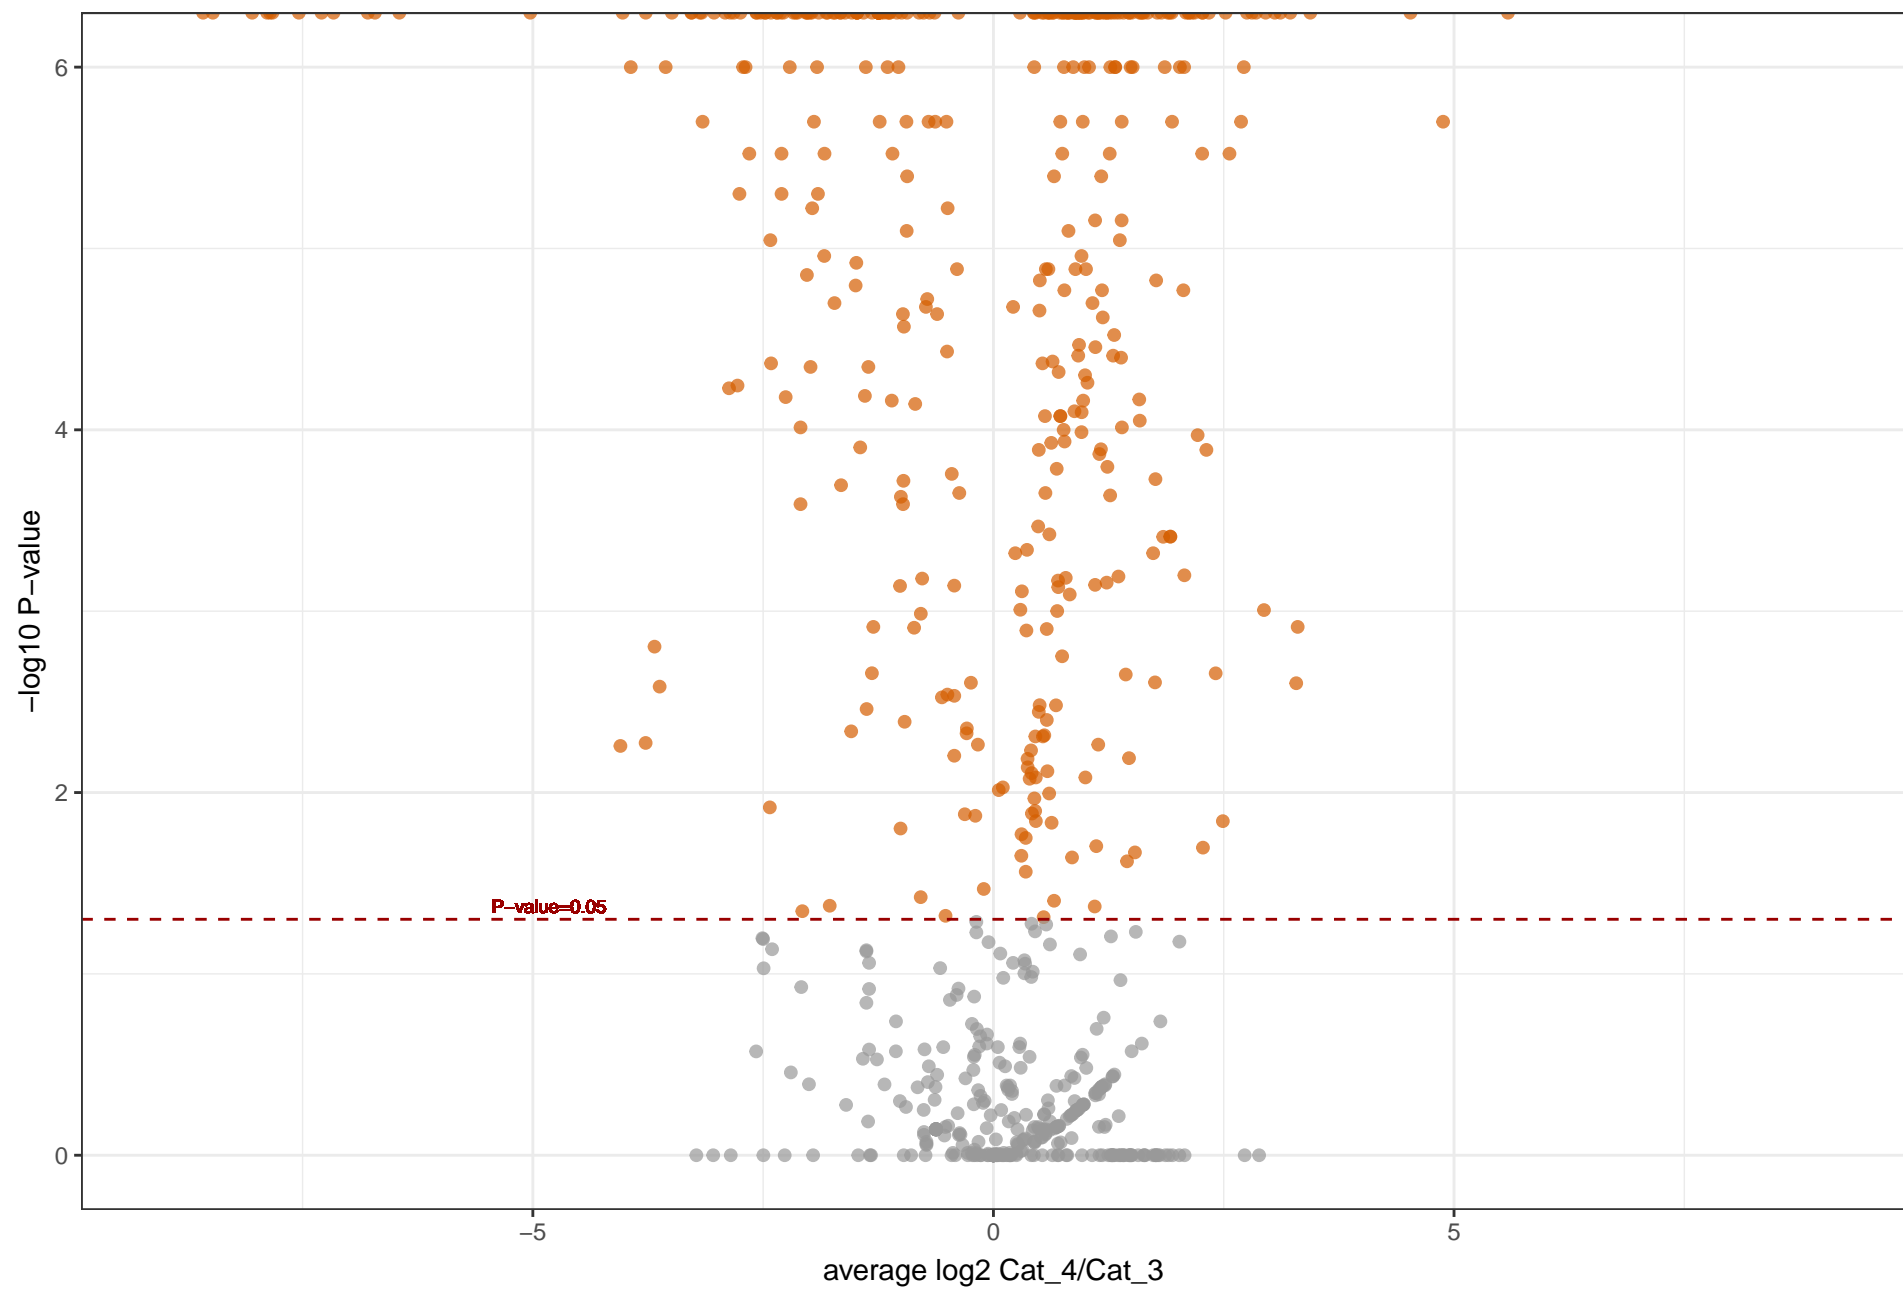

Supplement: supp [file elife-75798-supp-v1.zip]

MA plot

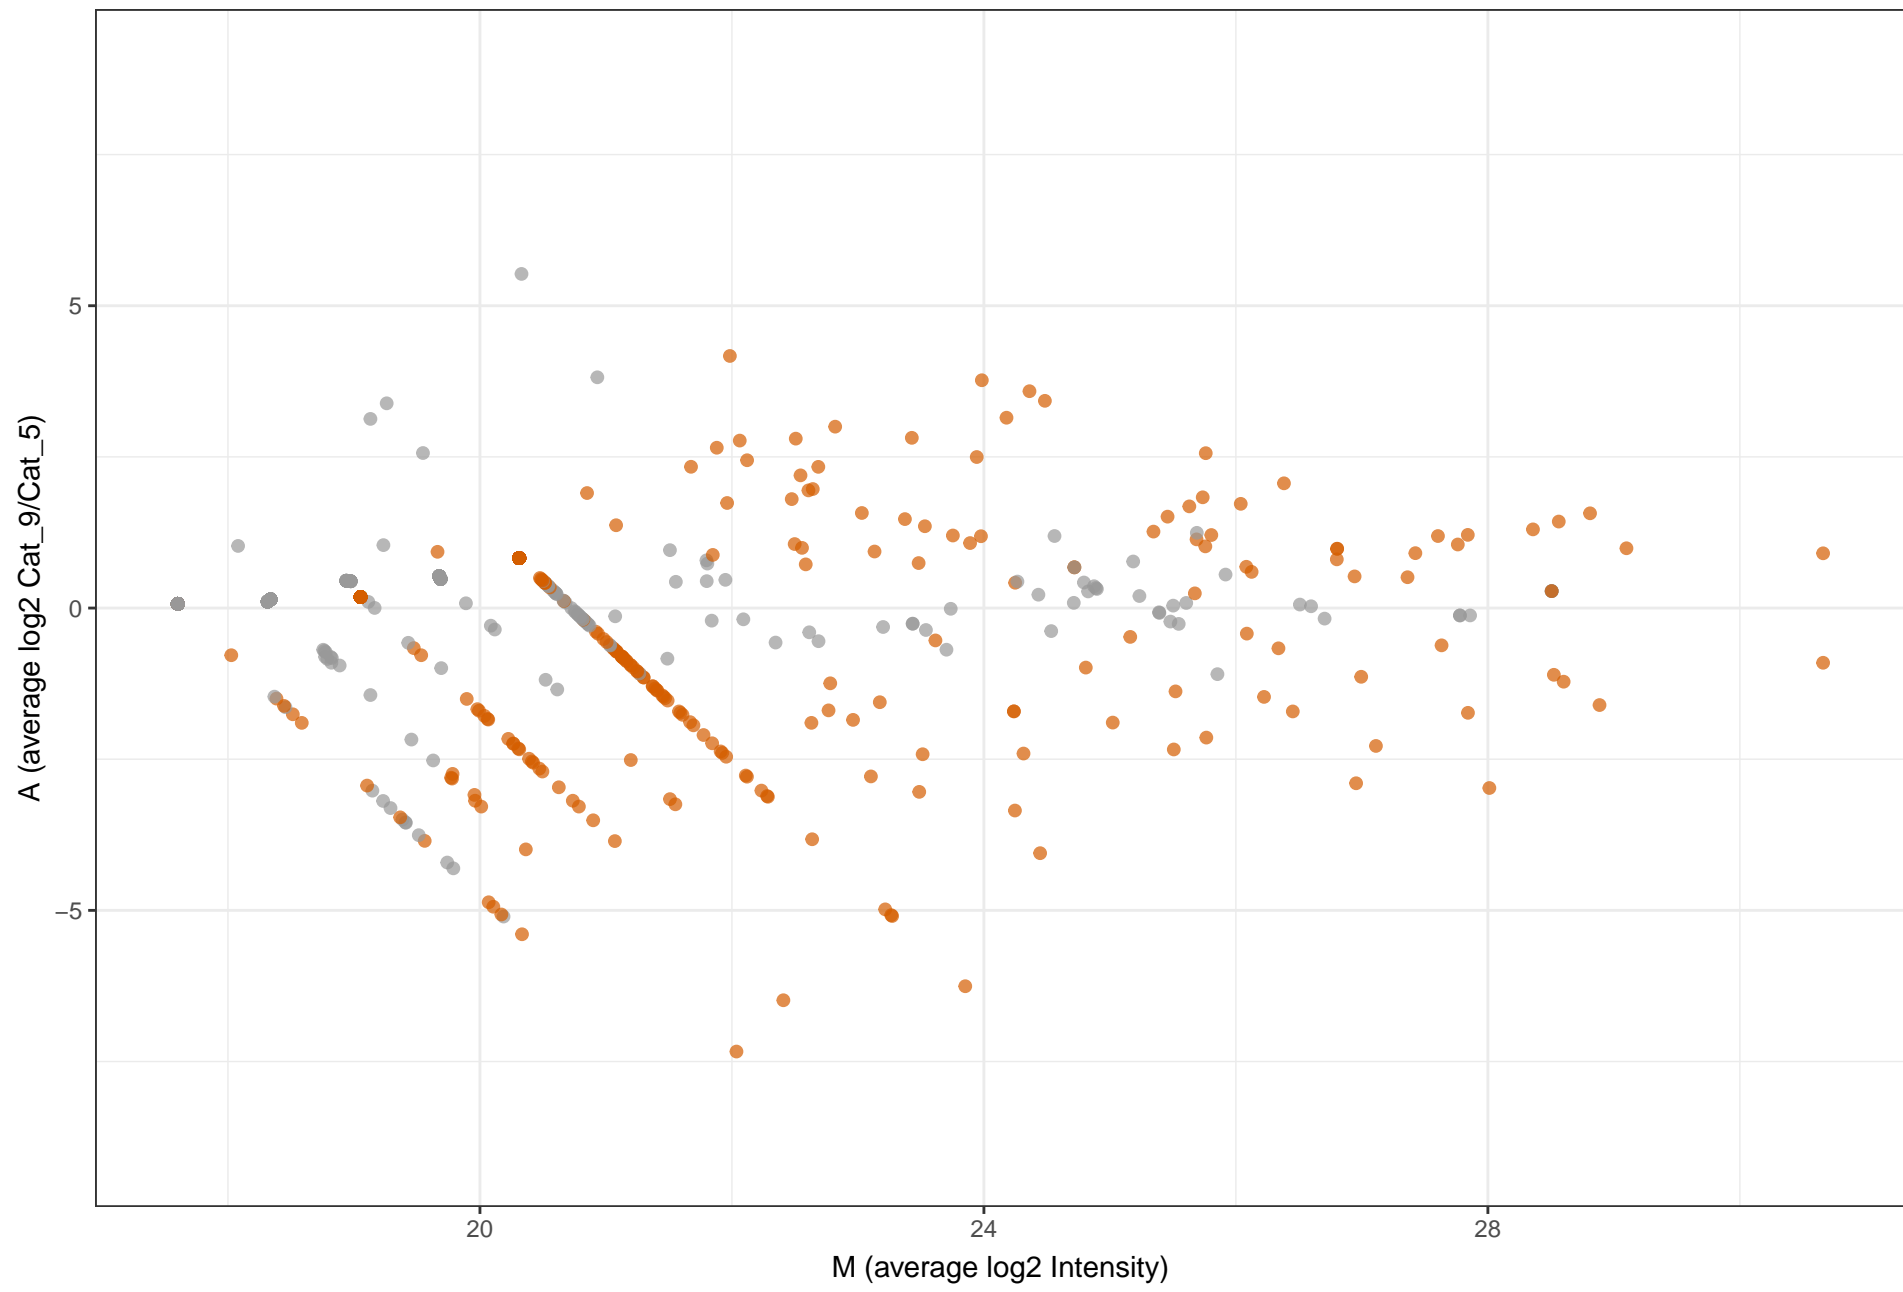

Supplement: supp [file elife-75798-supp-v1.zip]

Value-ordered fold change

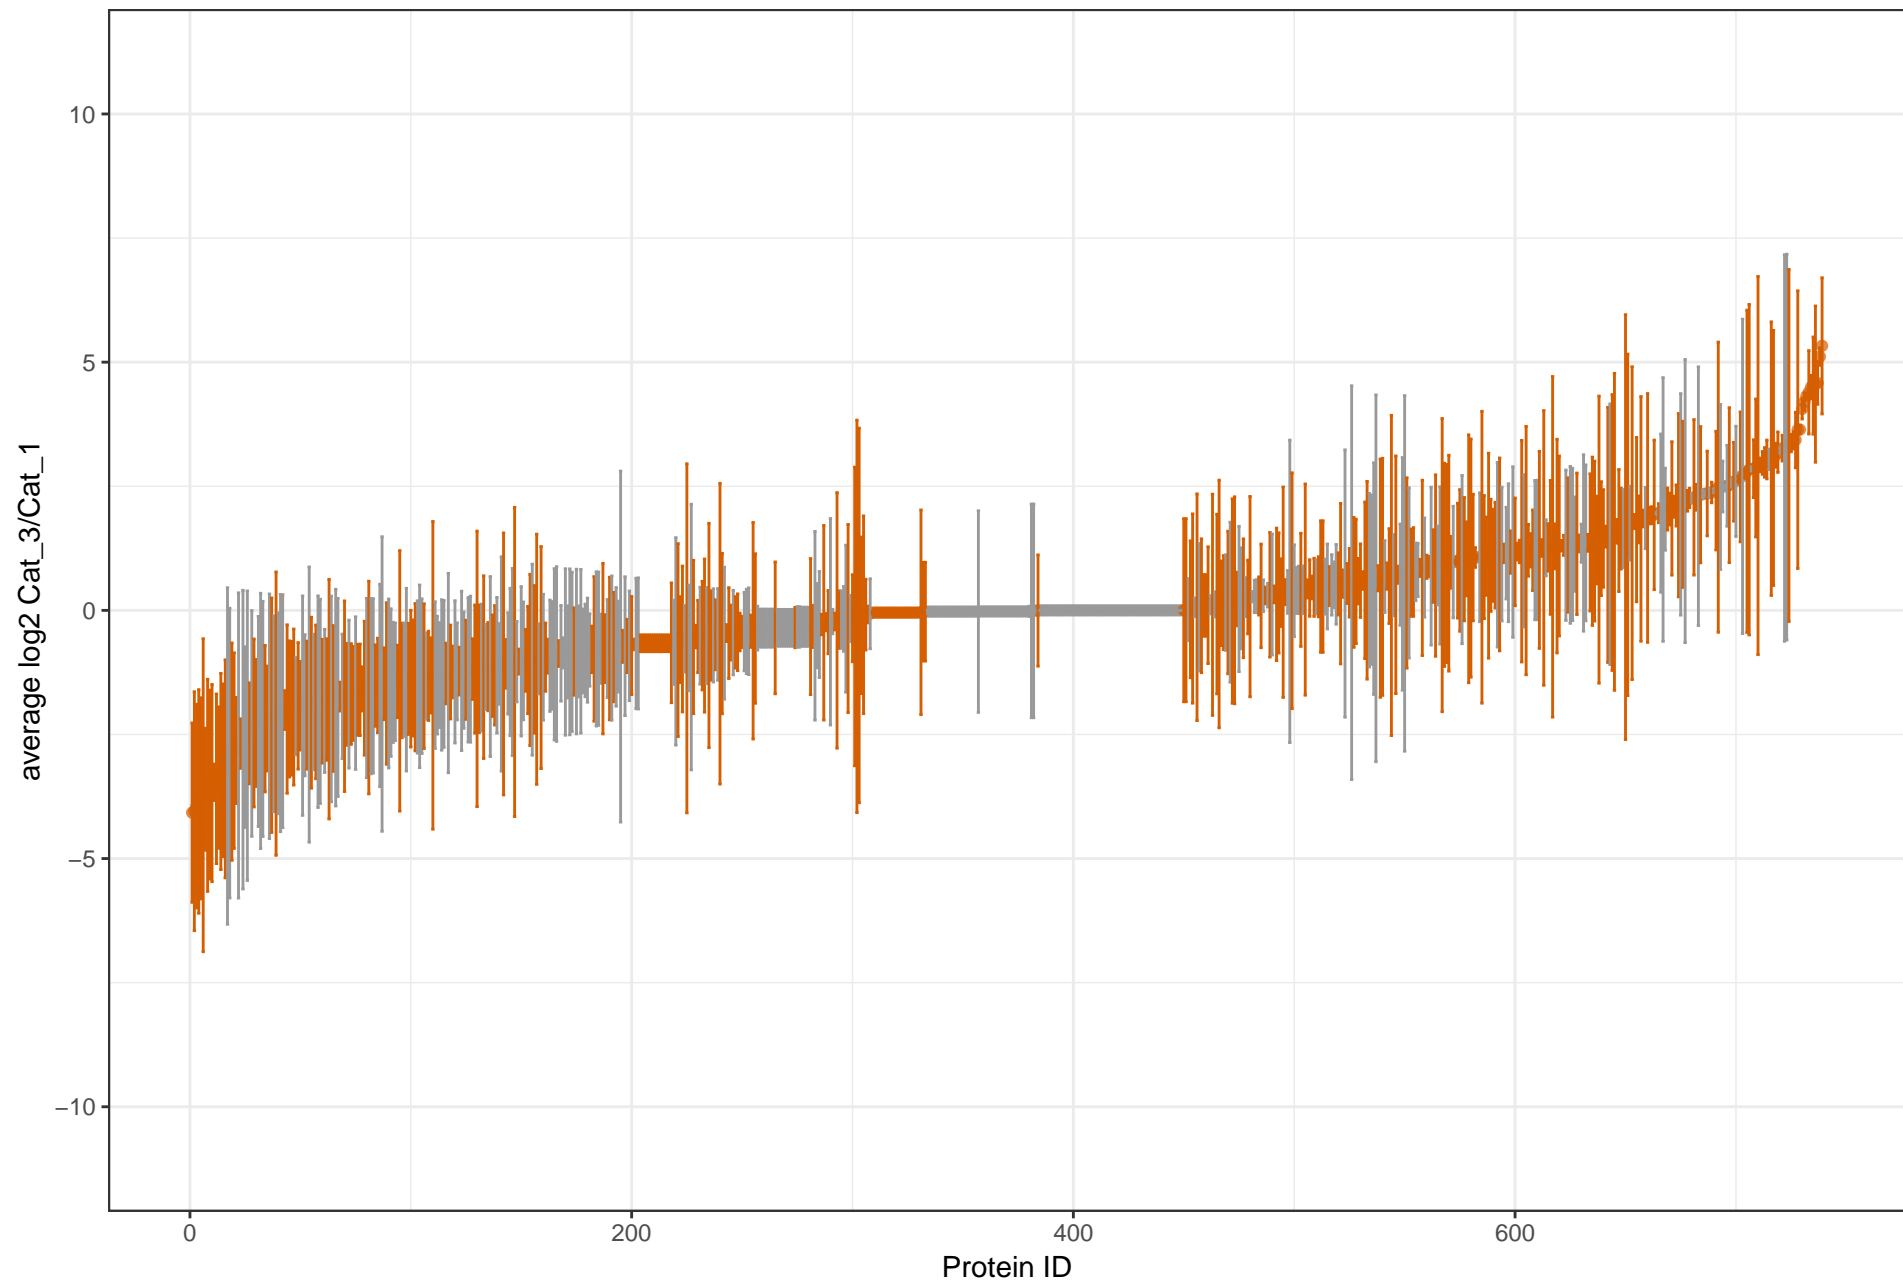

Supplement: supp [file elife-75798-supp-v1.zip]

P-value vs Fold change

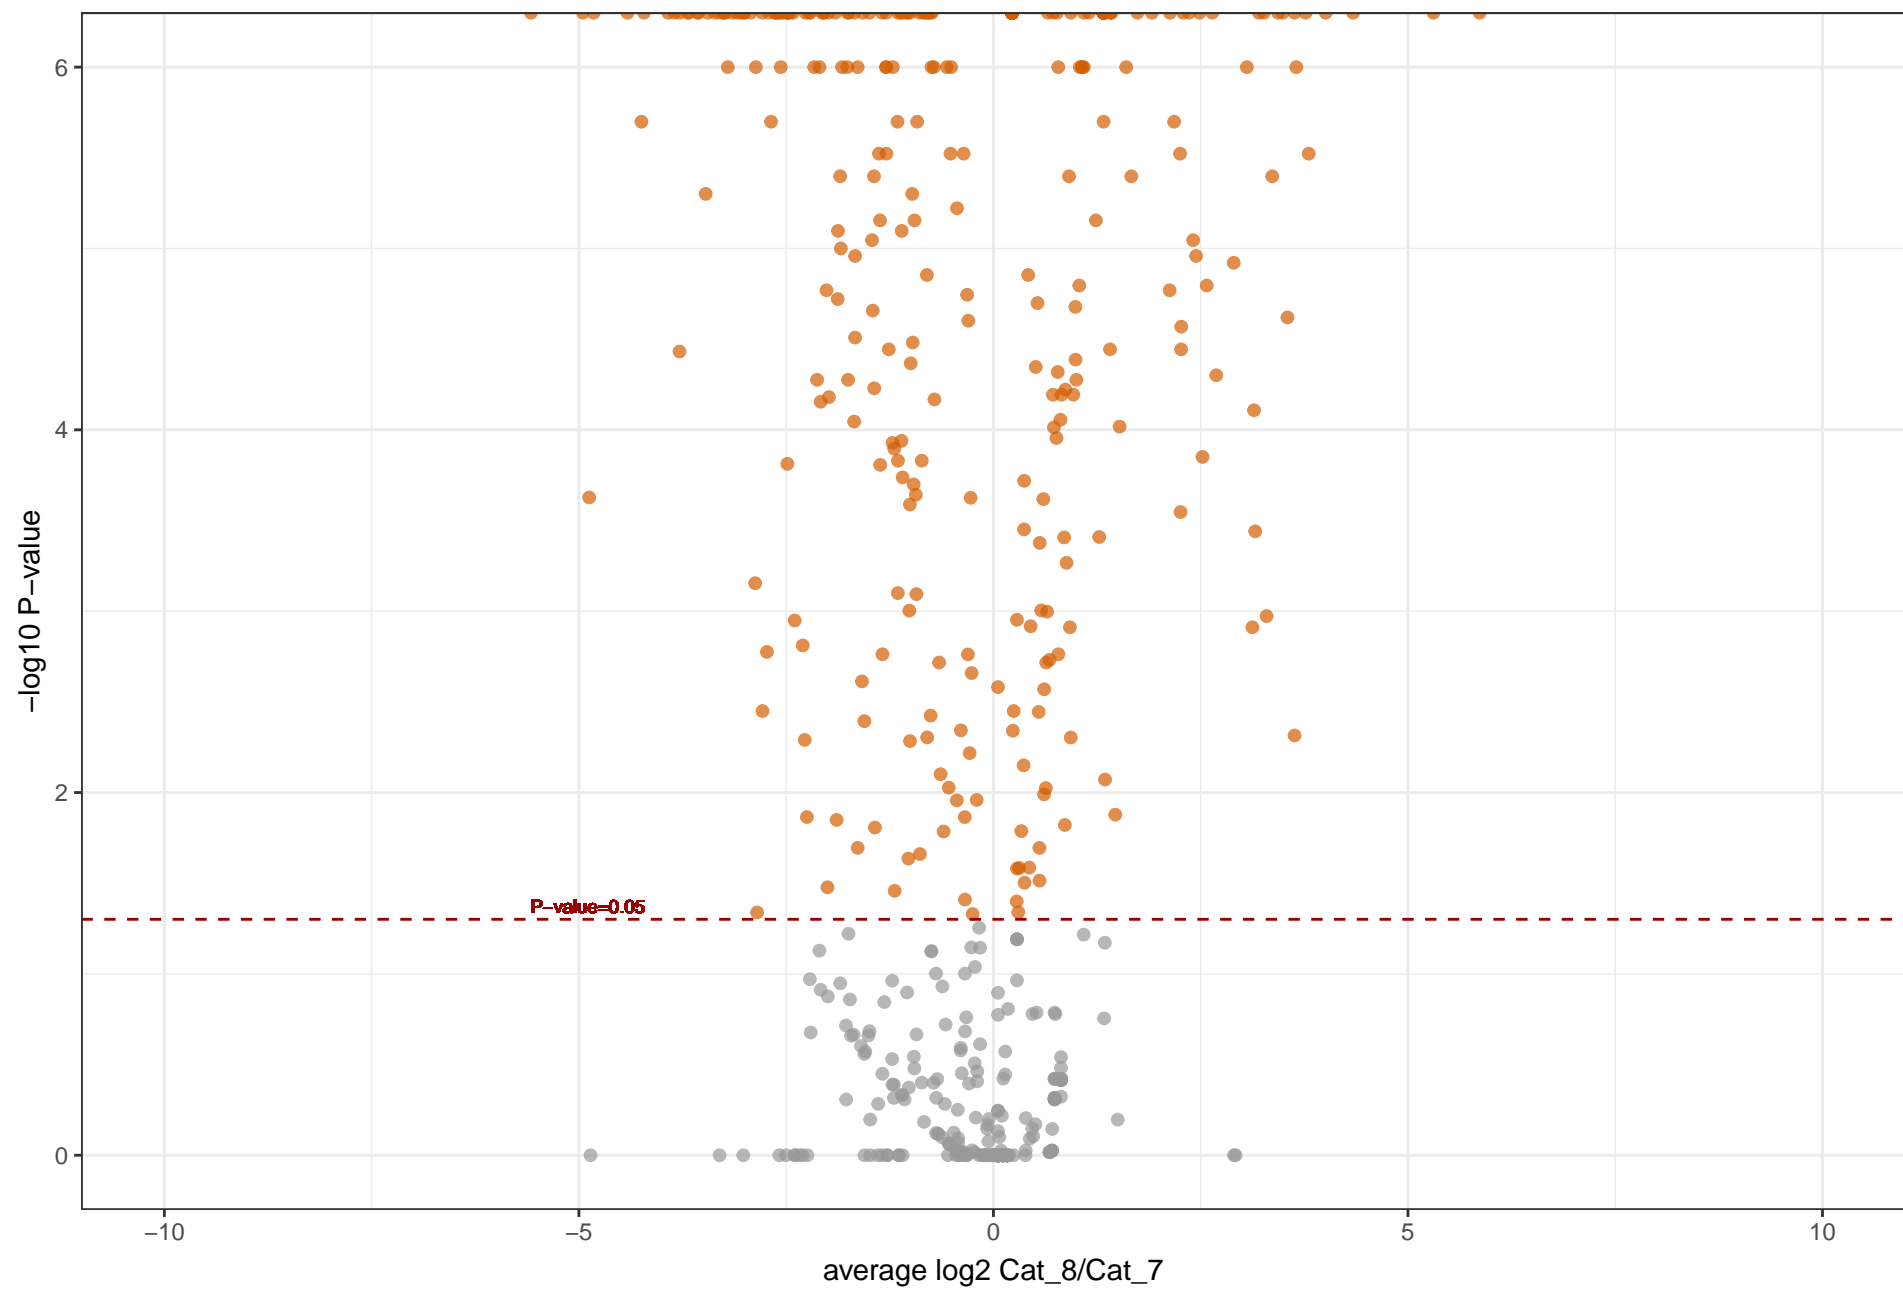

Supplement: supp [file elife-75798-supp-v1.zip]

P-value vs Fold change

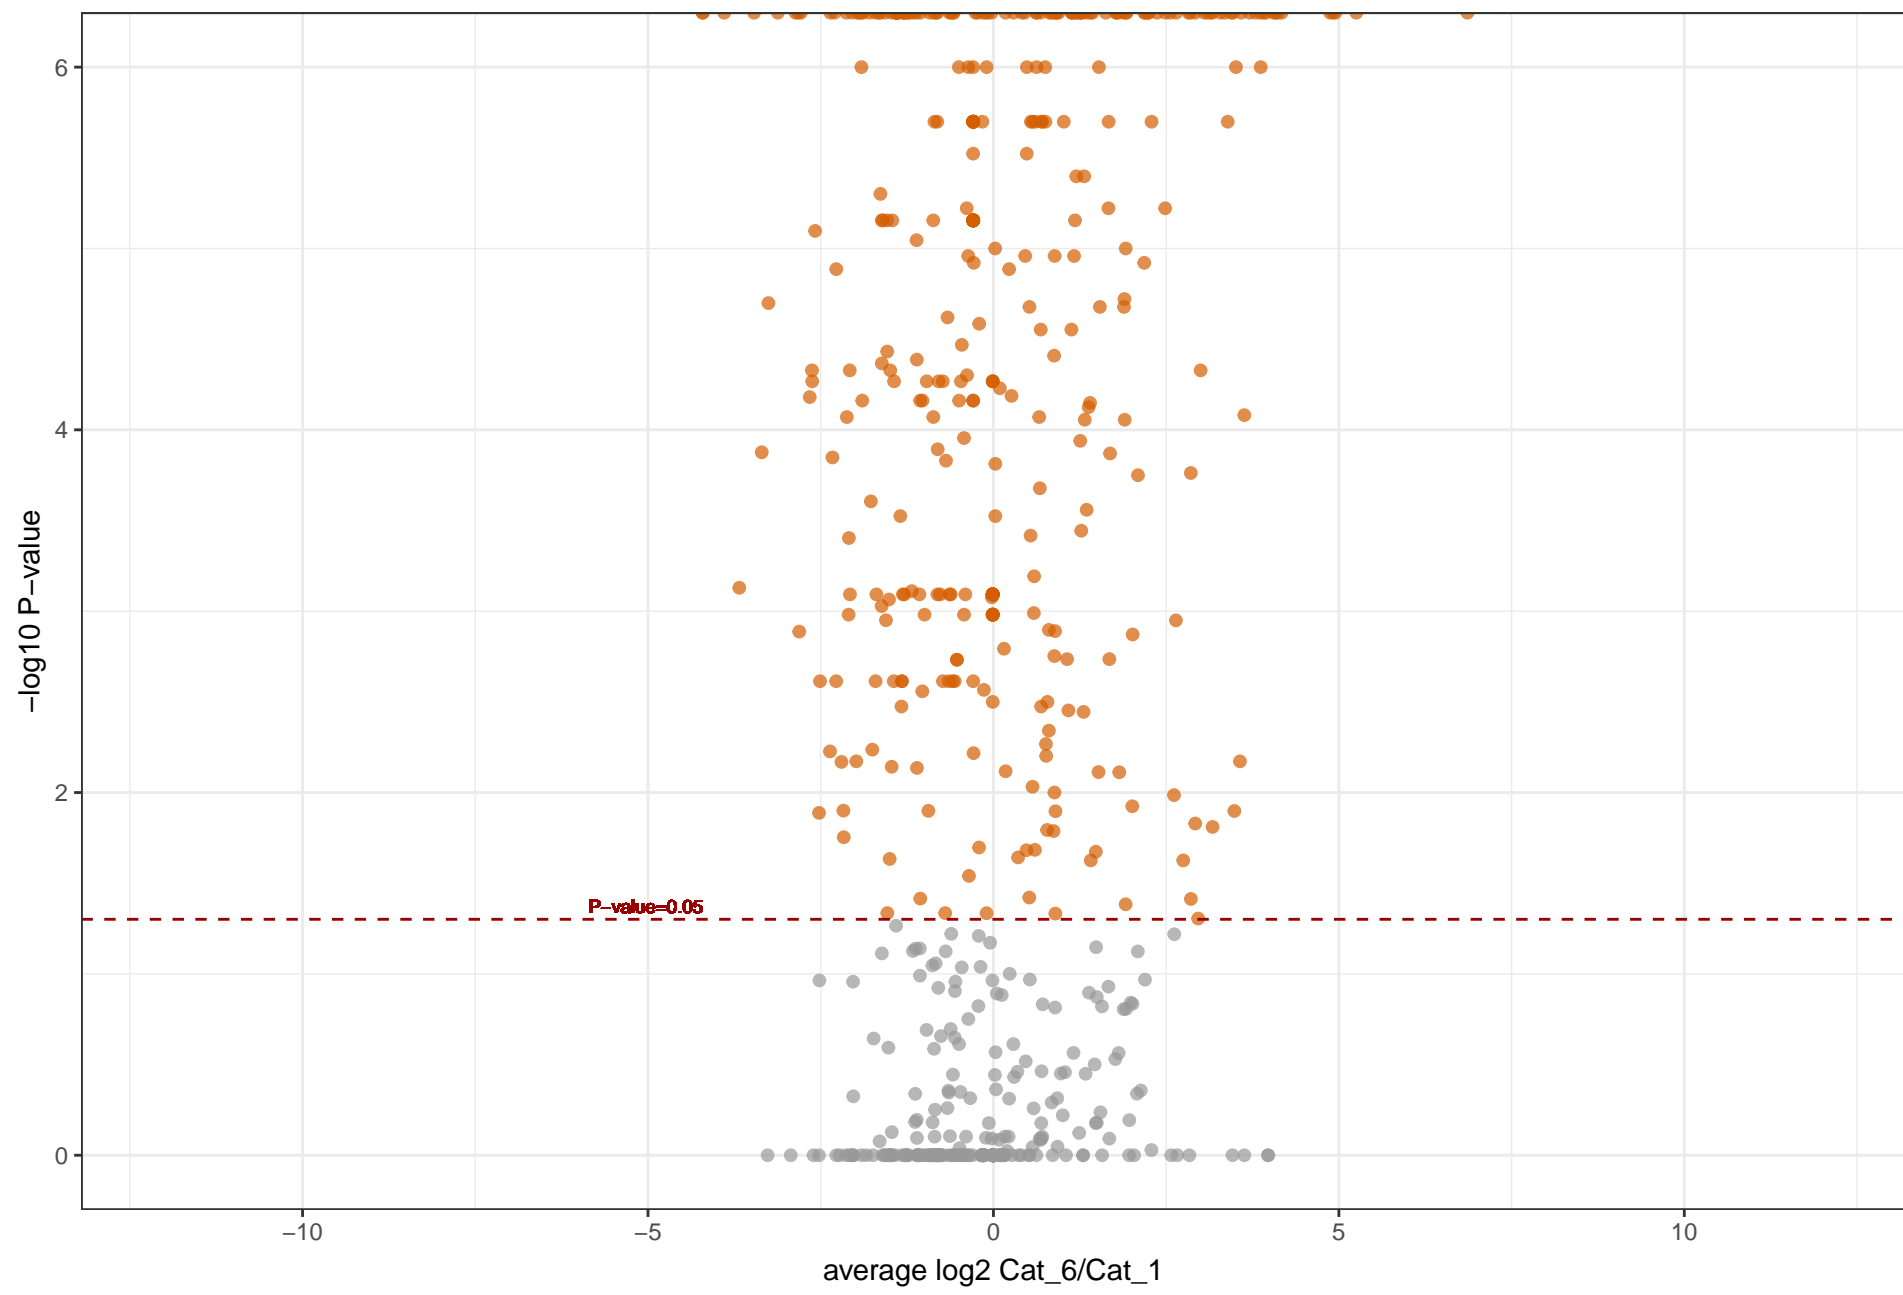

Supplement: supp [file elife-75798-supp-v1.zip]

P-value vs Fold change

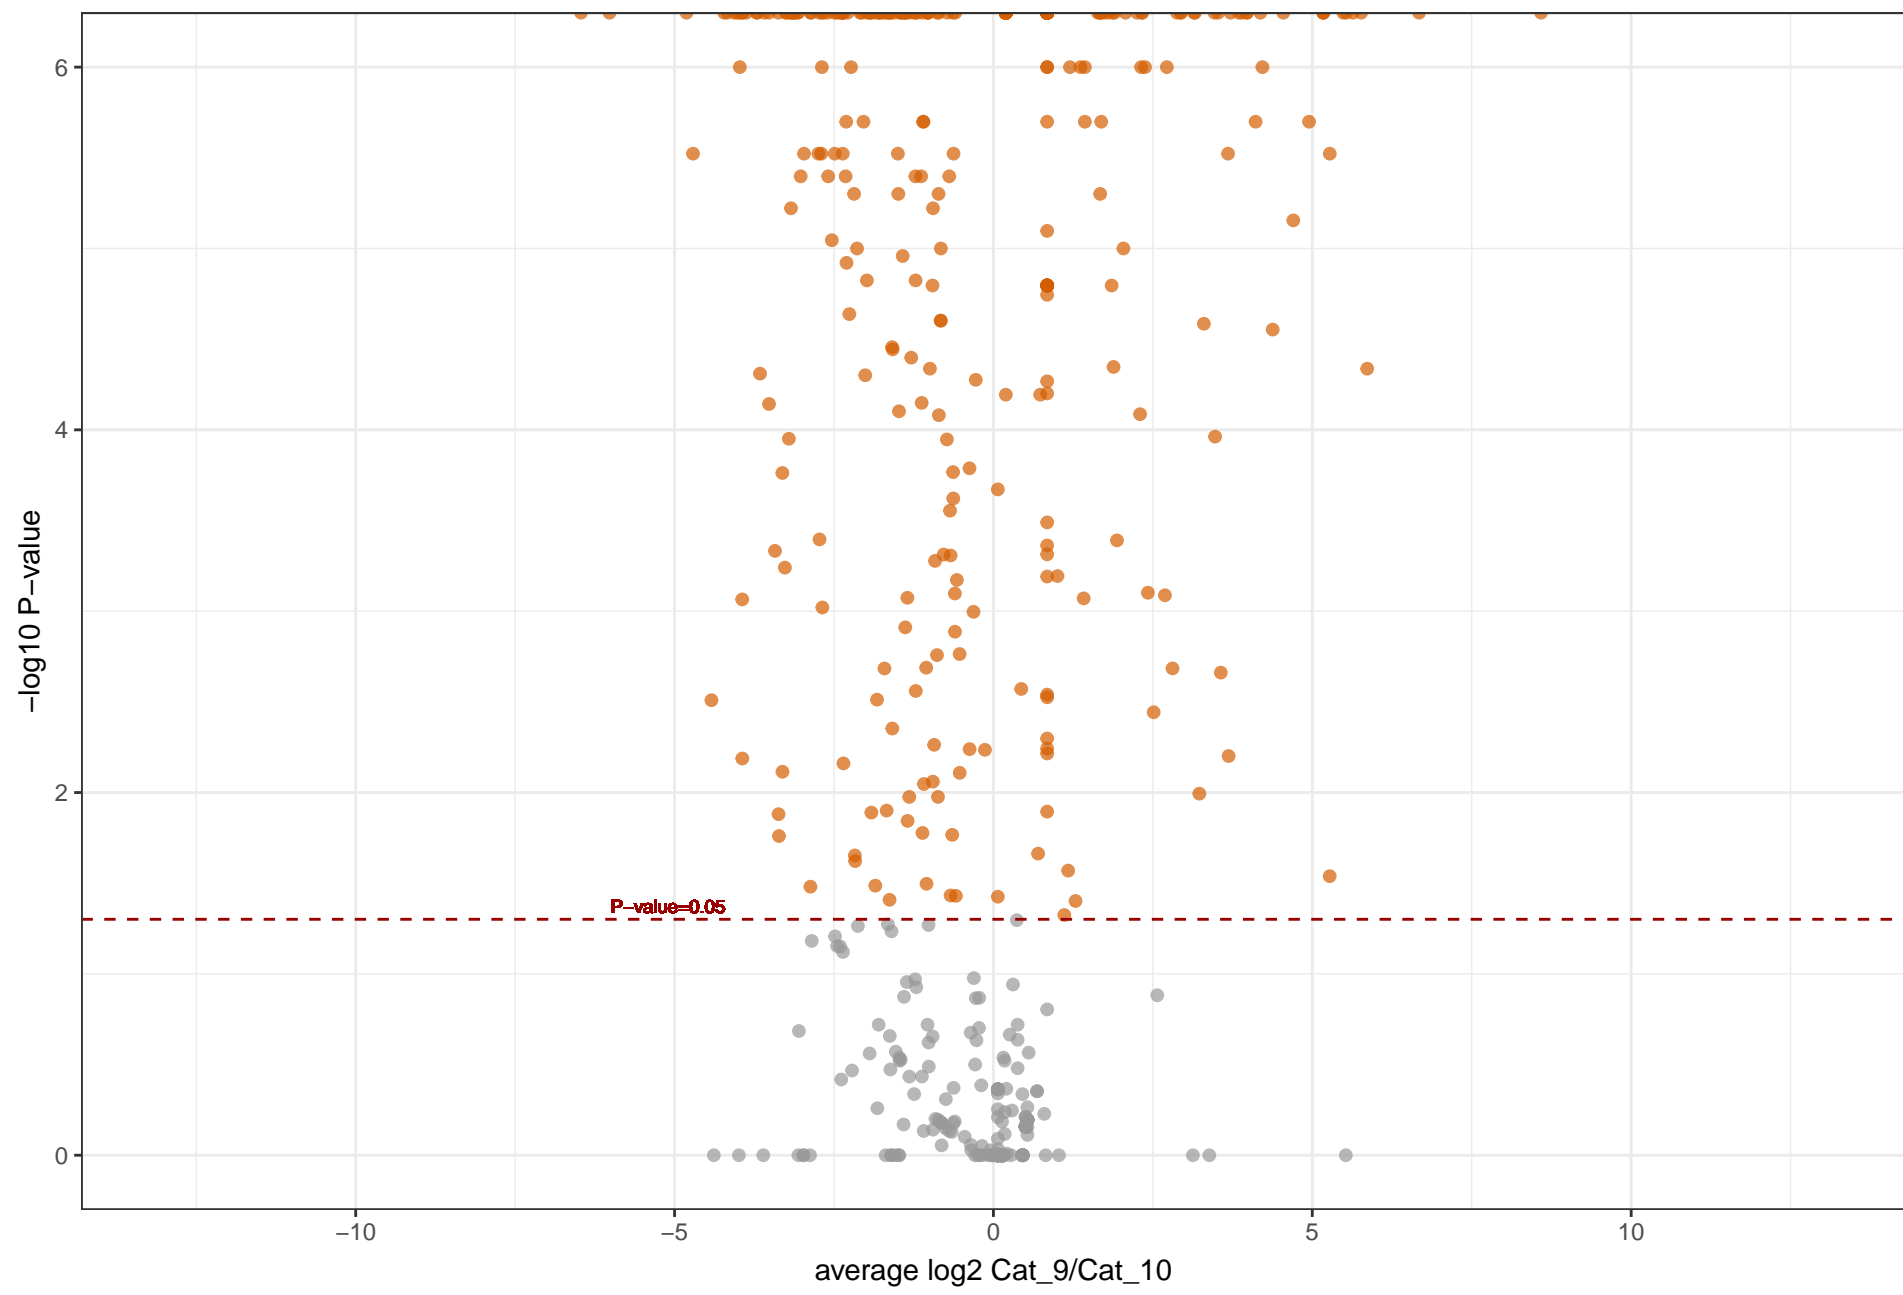

Supplement: supp [file elife-75798-supp-v1.zip]

MA plot

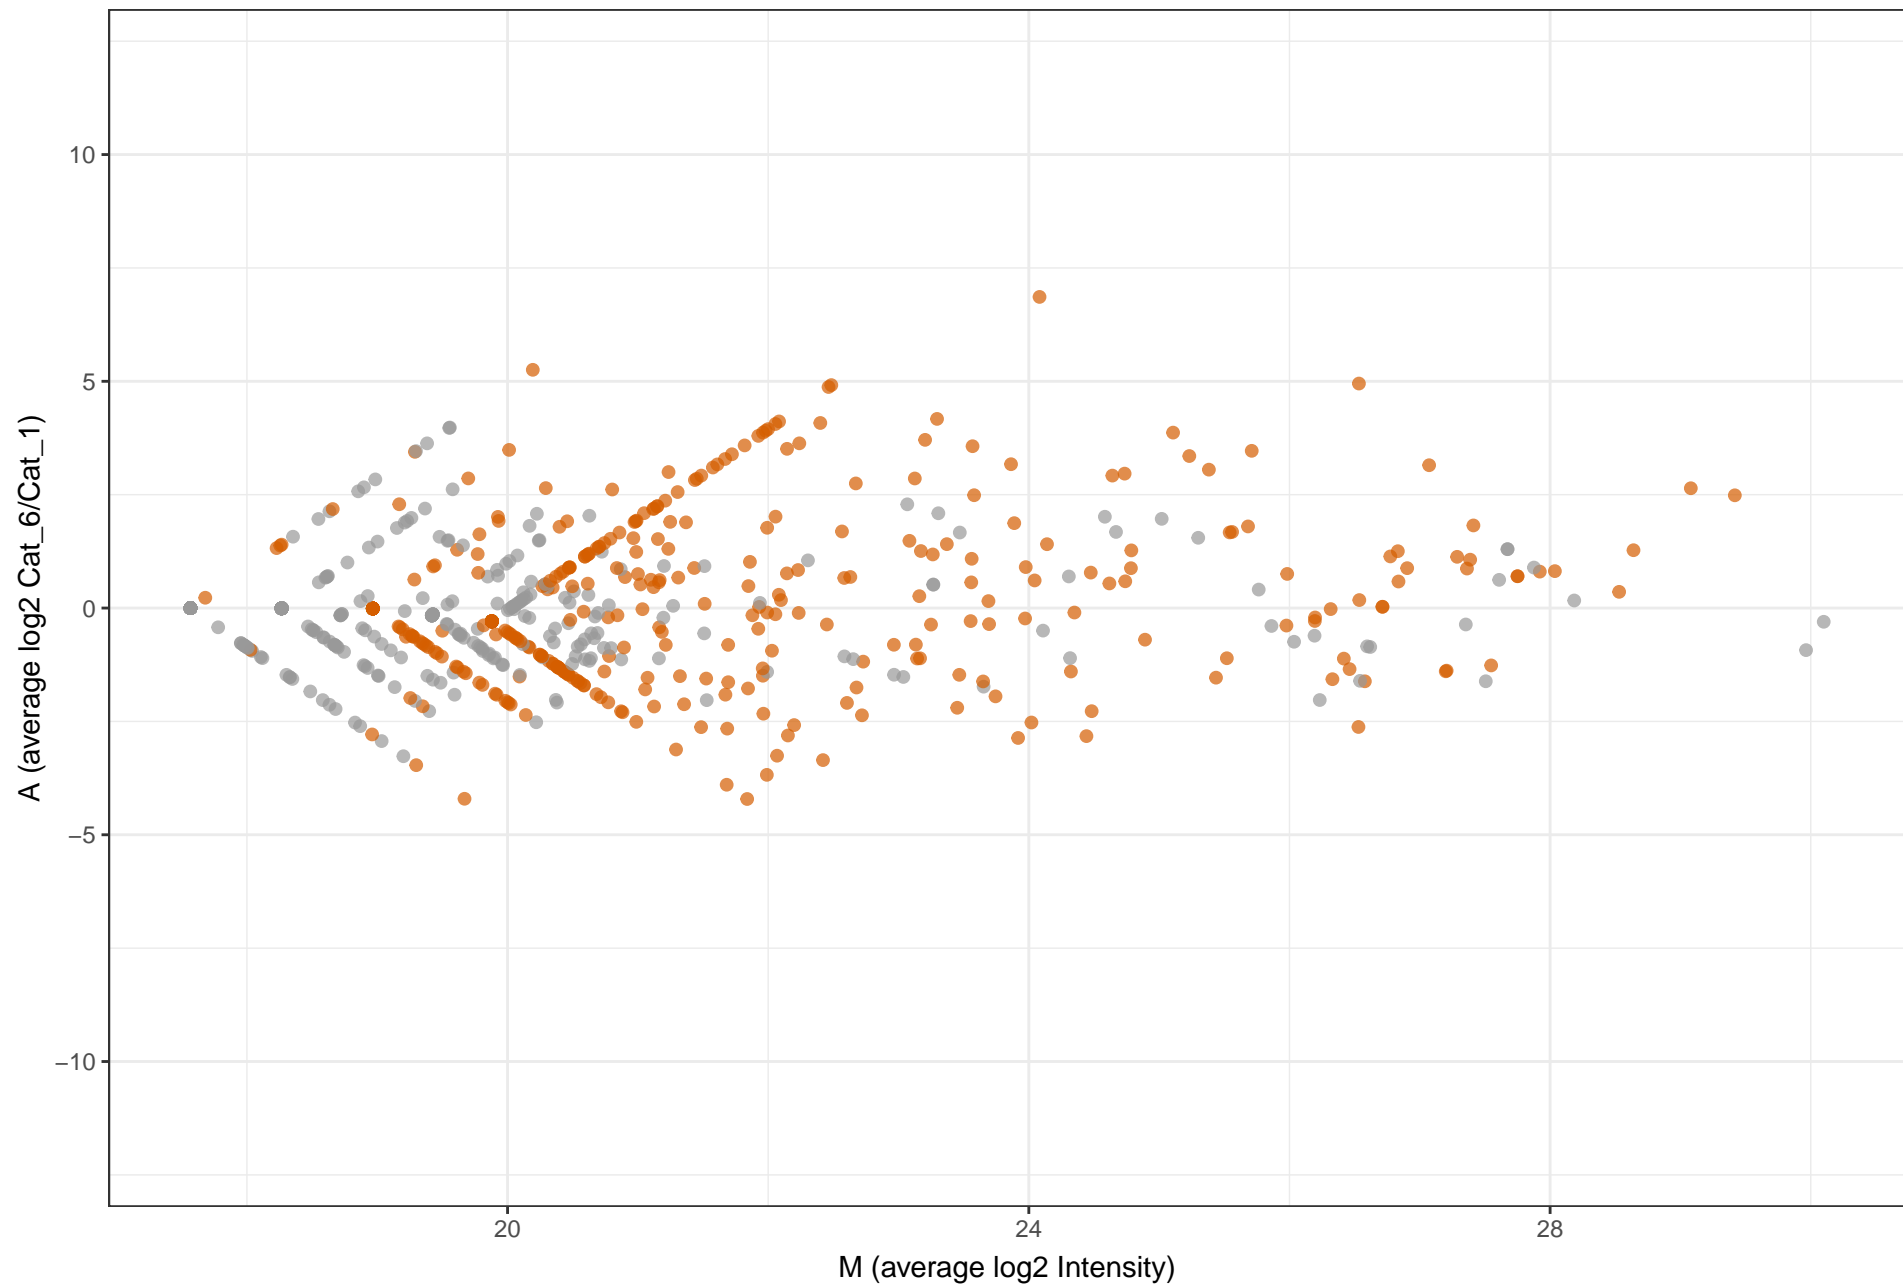

Supplement: supp [file elife-75798-supp-v1.zip]

P-value vs Fold change

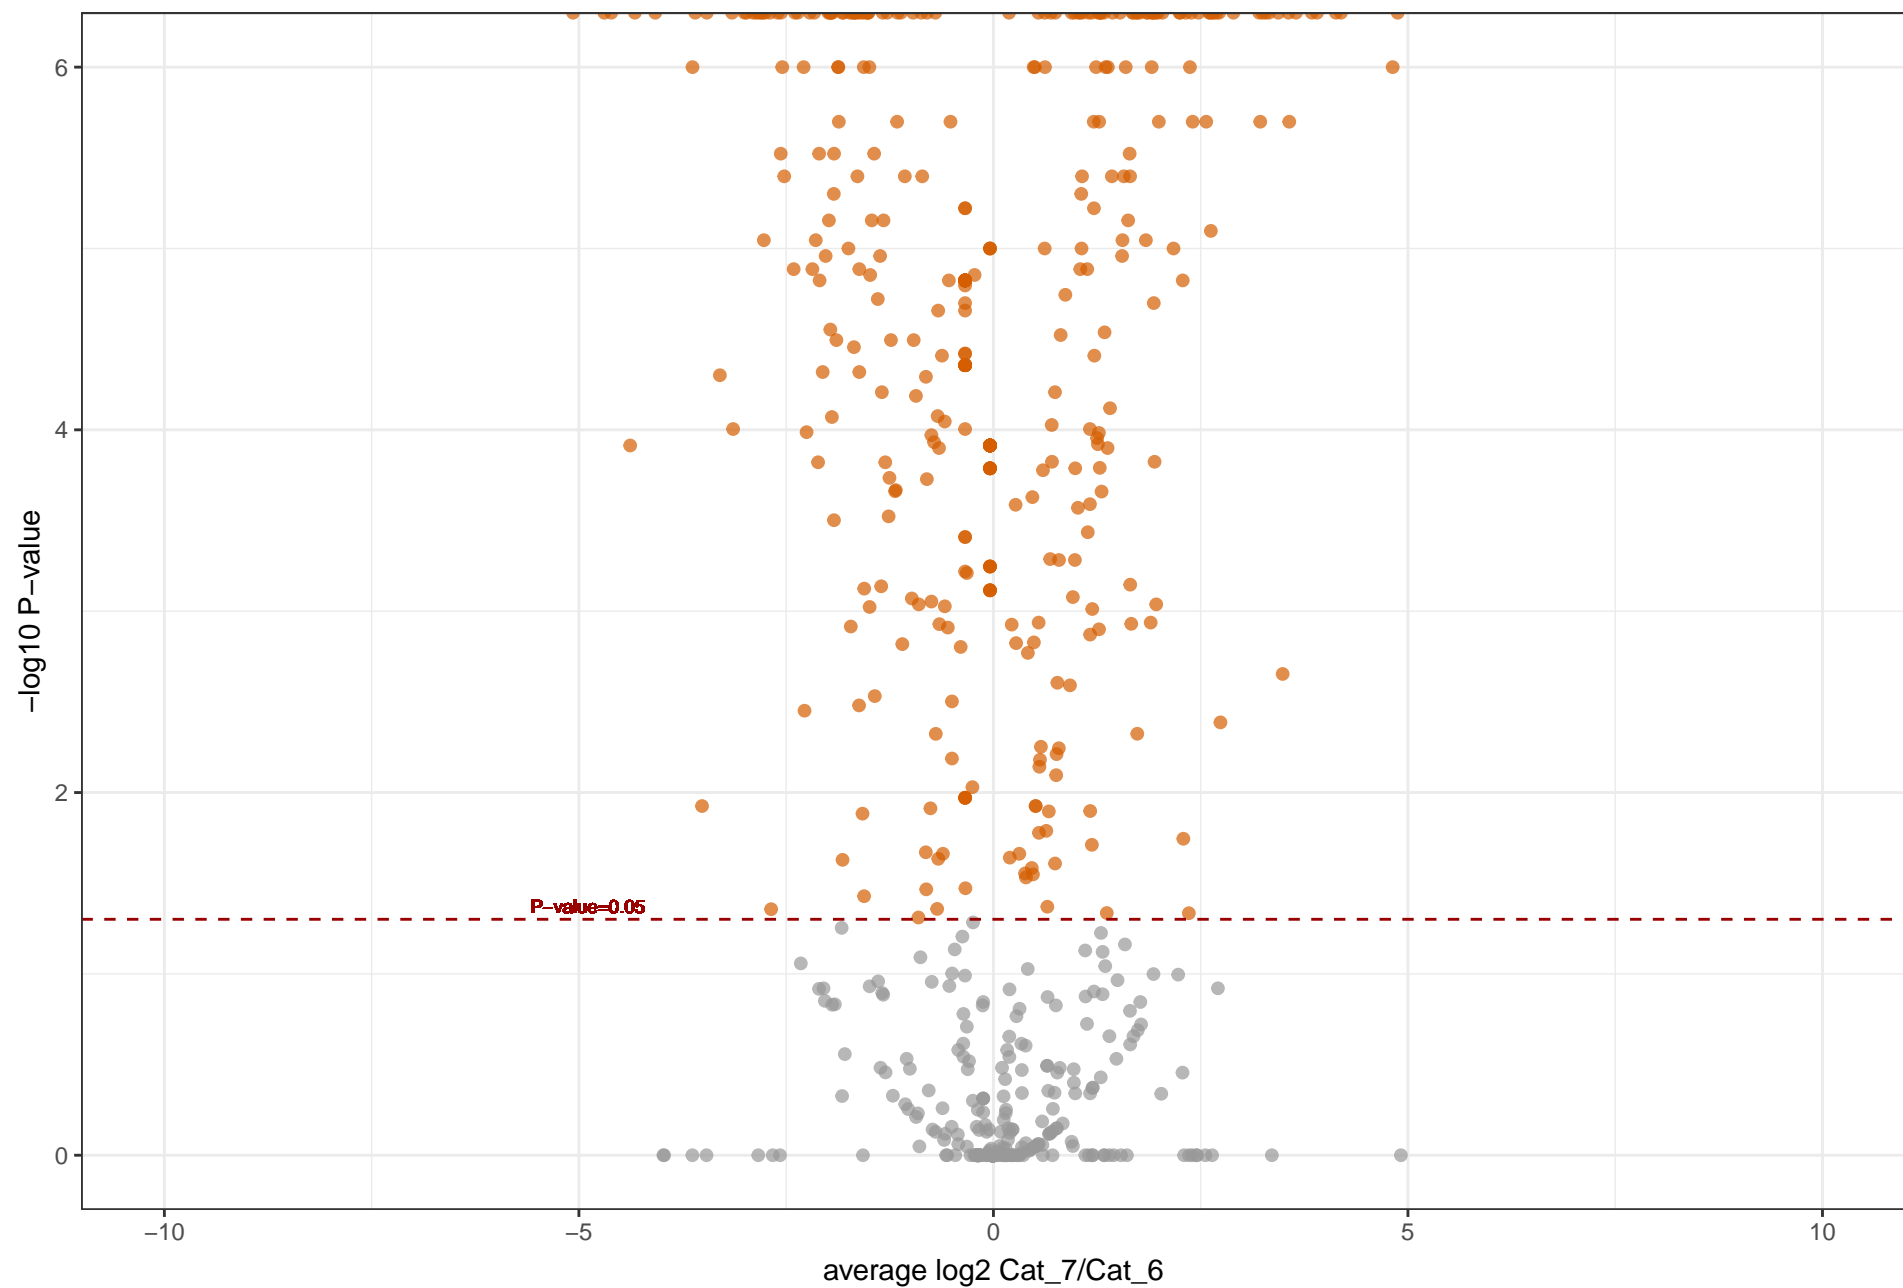

Supplement: supp [file elife-75798-supp-v1.zip]

Value-ordered fold change

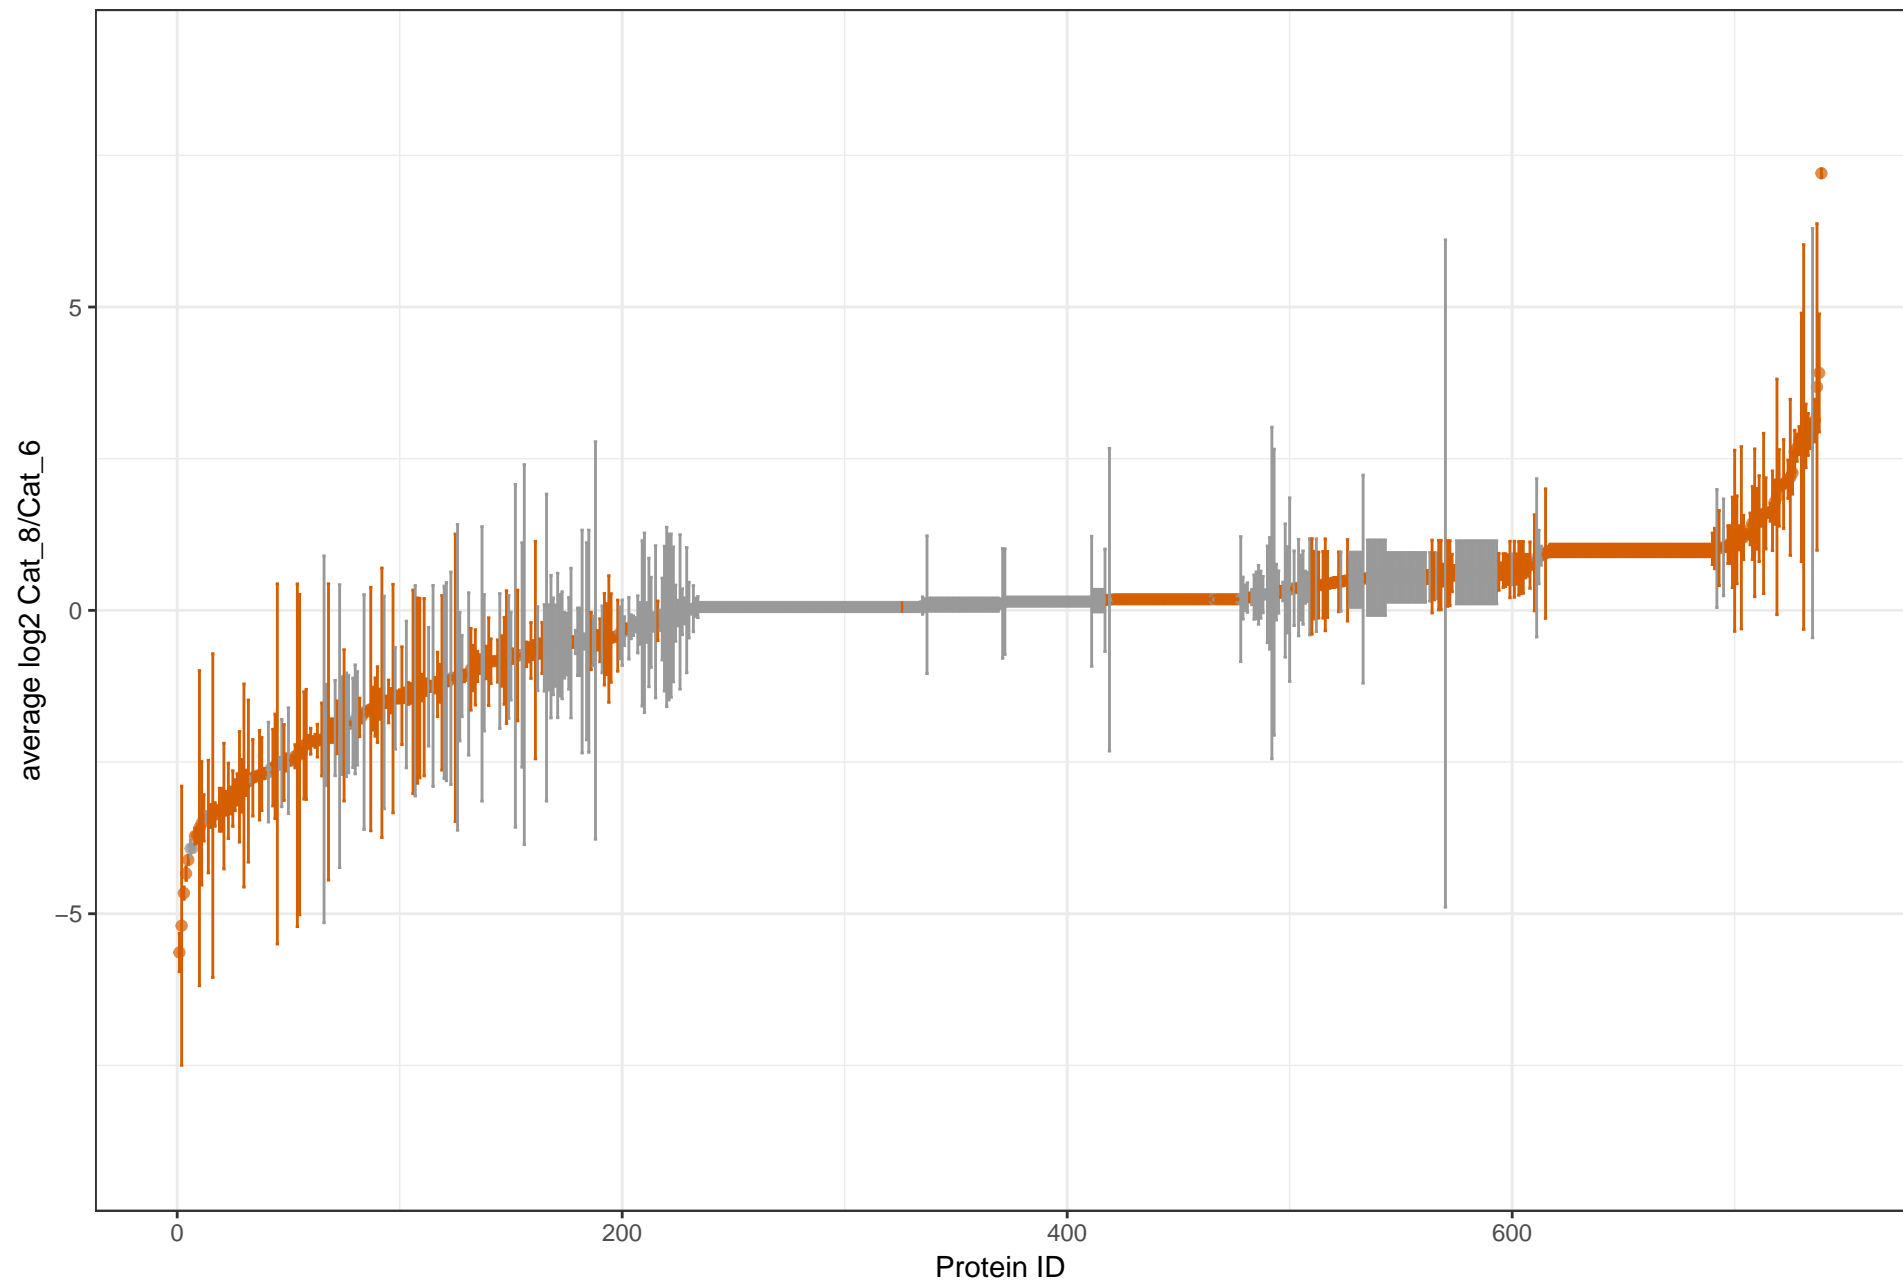

Supplement: supp [file elife-75798-supp-v1.zip]

P-value vs Fold change

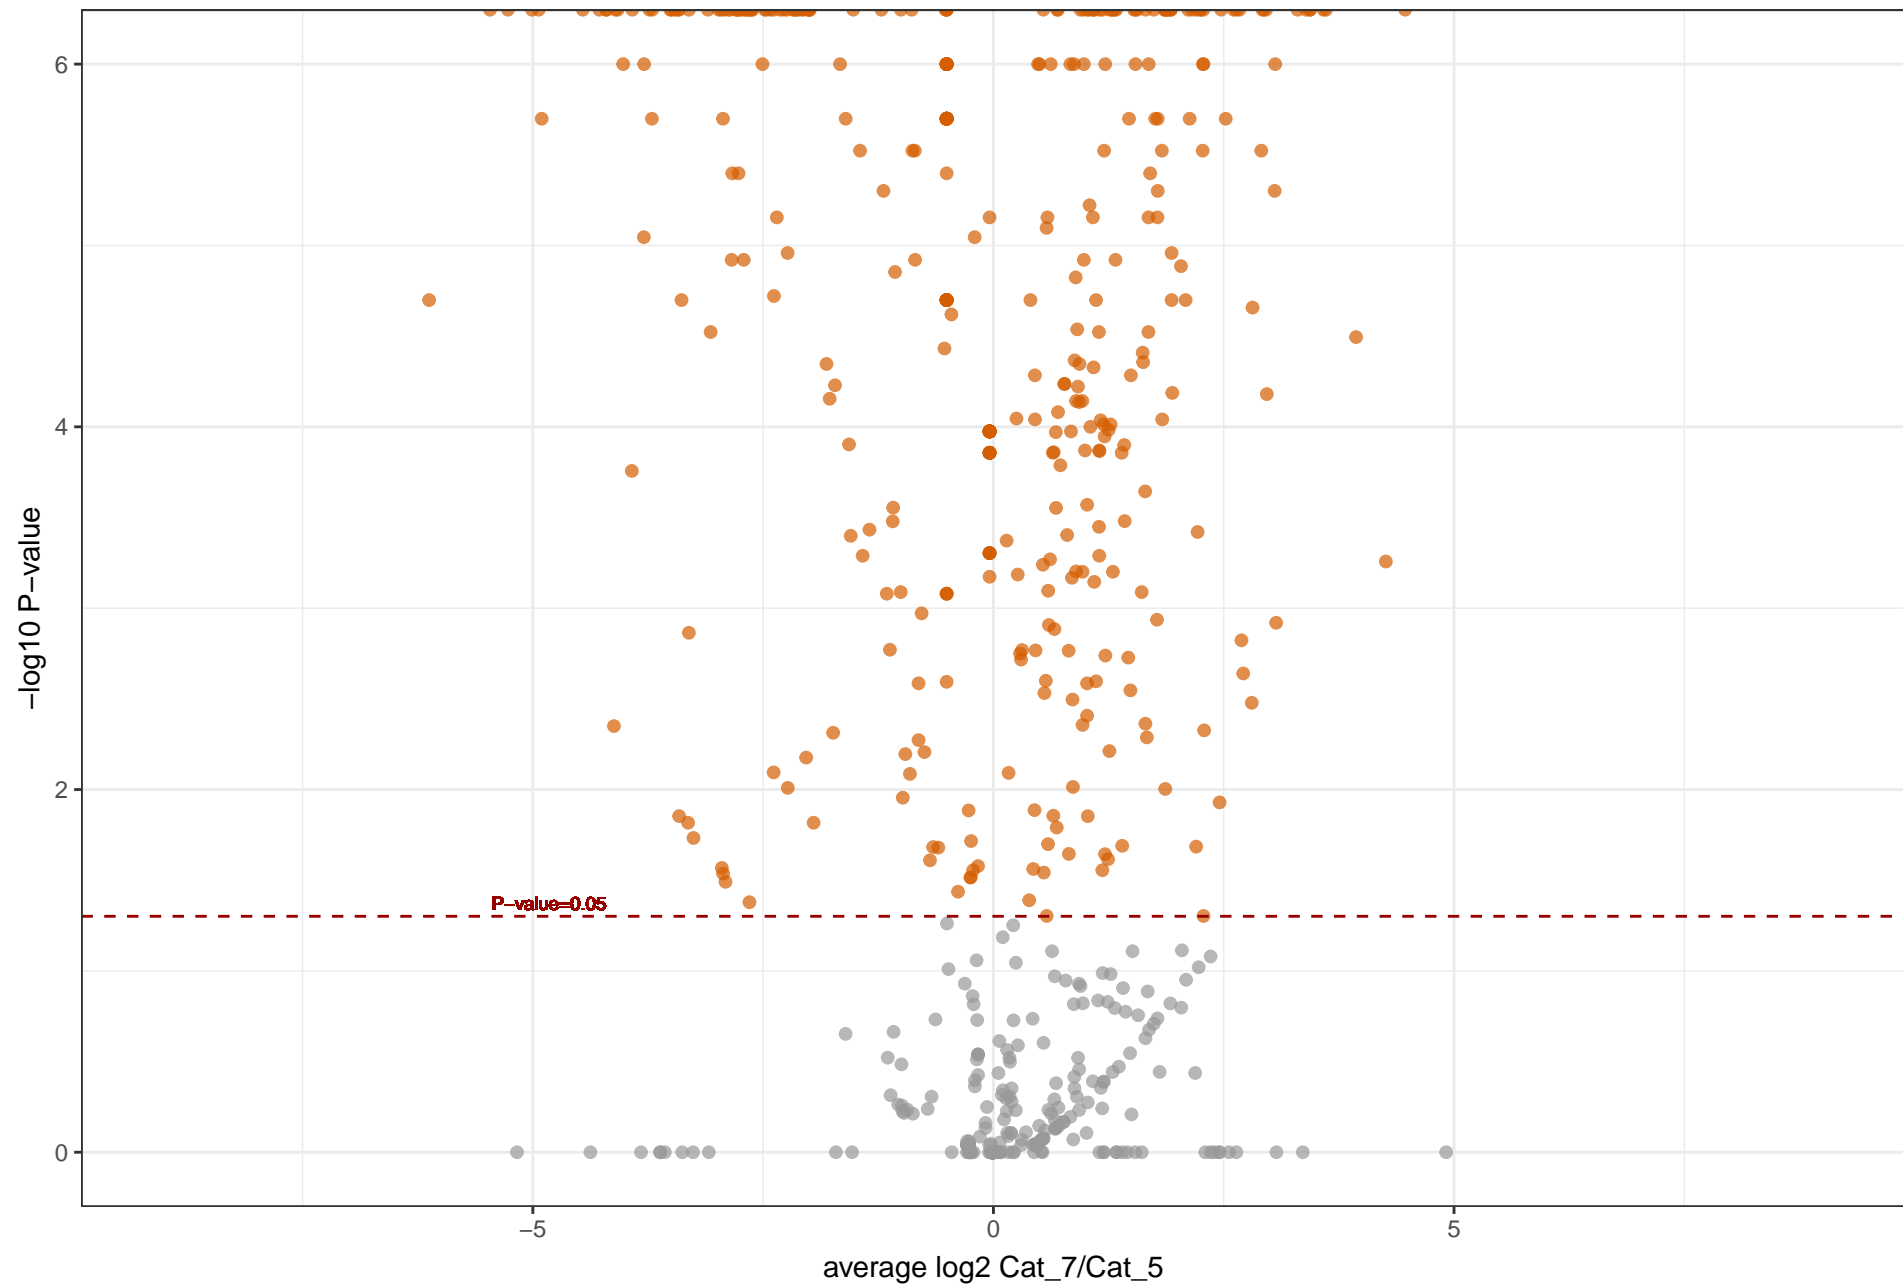

Supplement: supp [file elife-75798-supp-v1.zip]

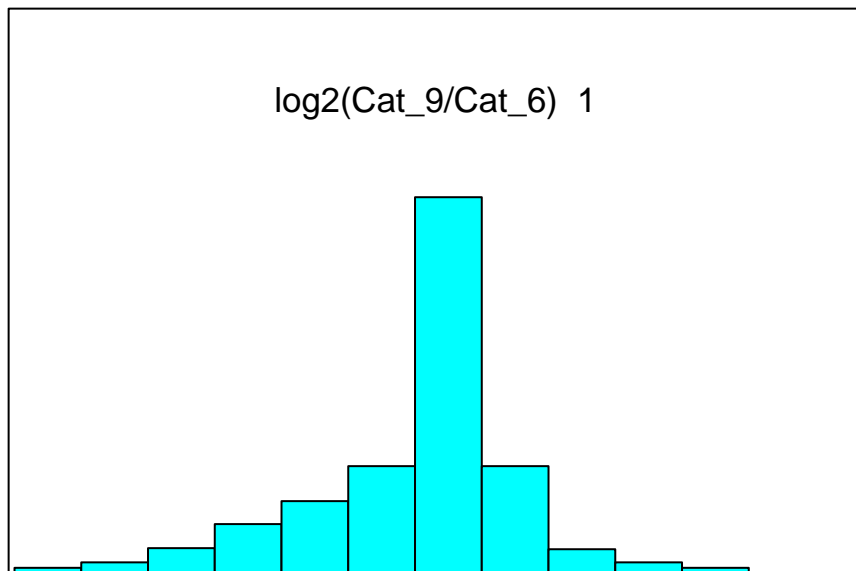

-6 -4 -2 0 2 4 6

6

4

2

0

-2

-4

-6

0.72

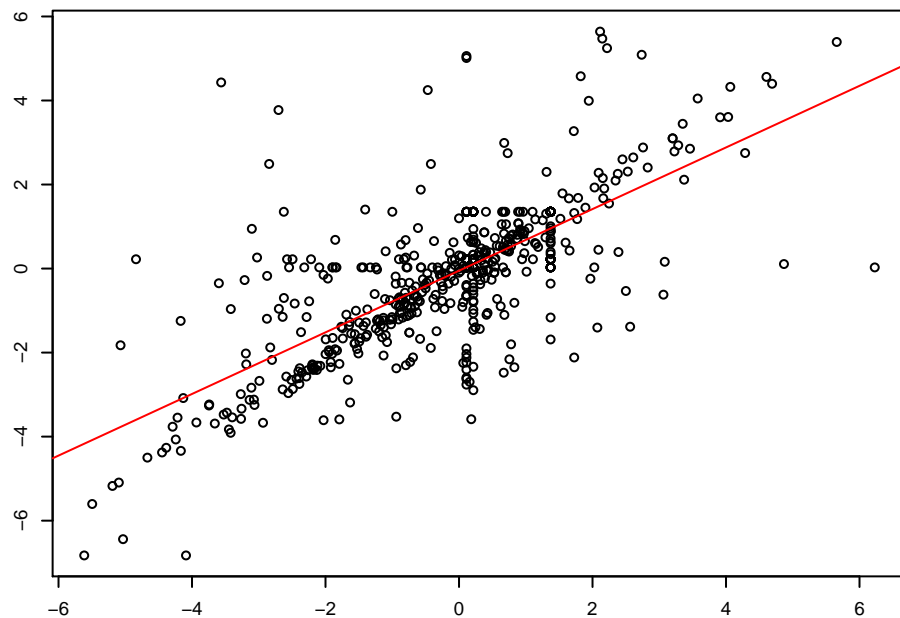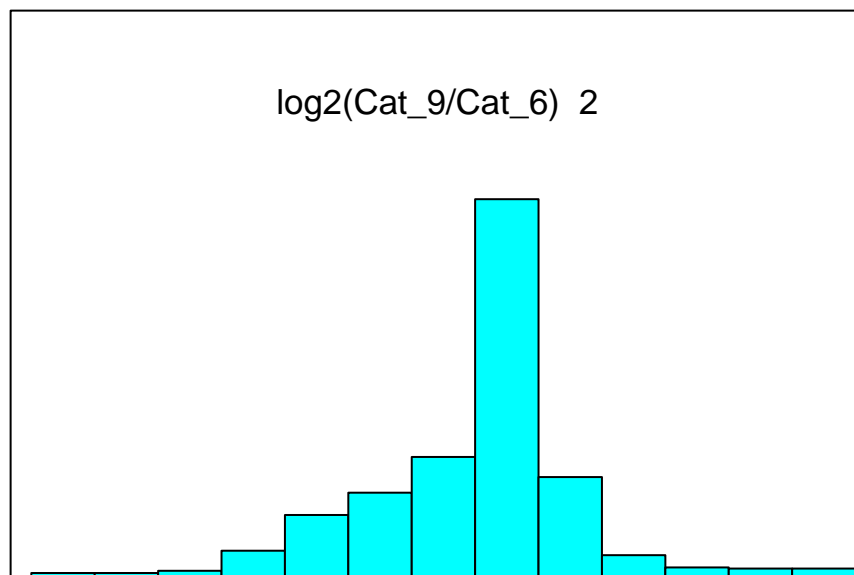

Supplement: supp [file elife-75798-supp-v1.zip]

MA plot

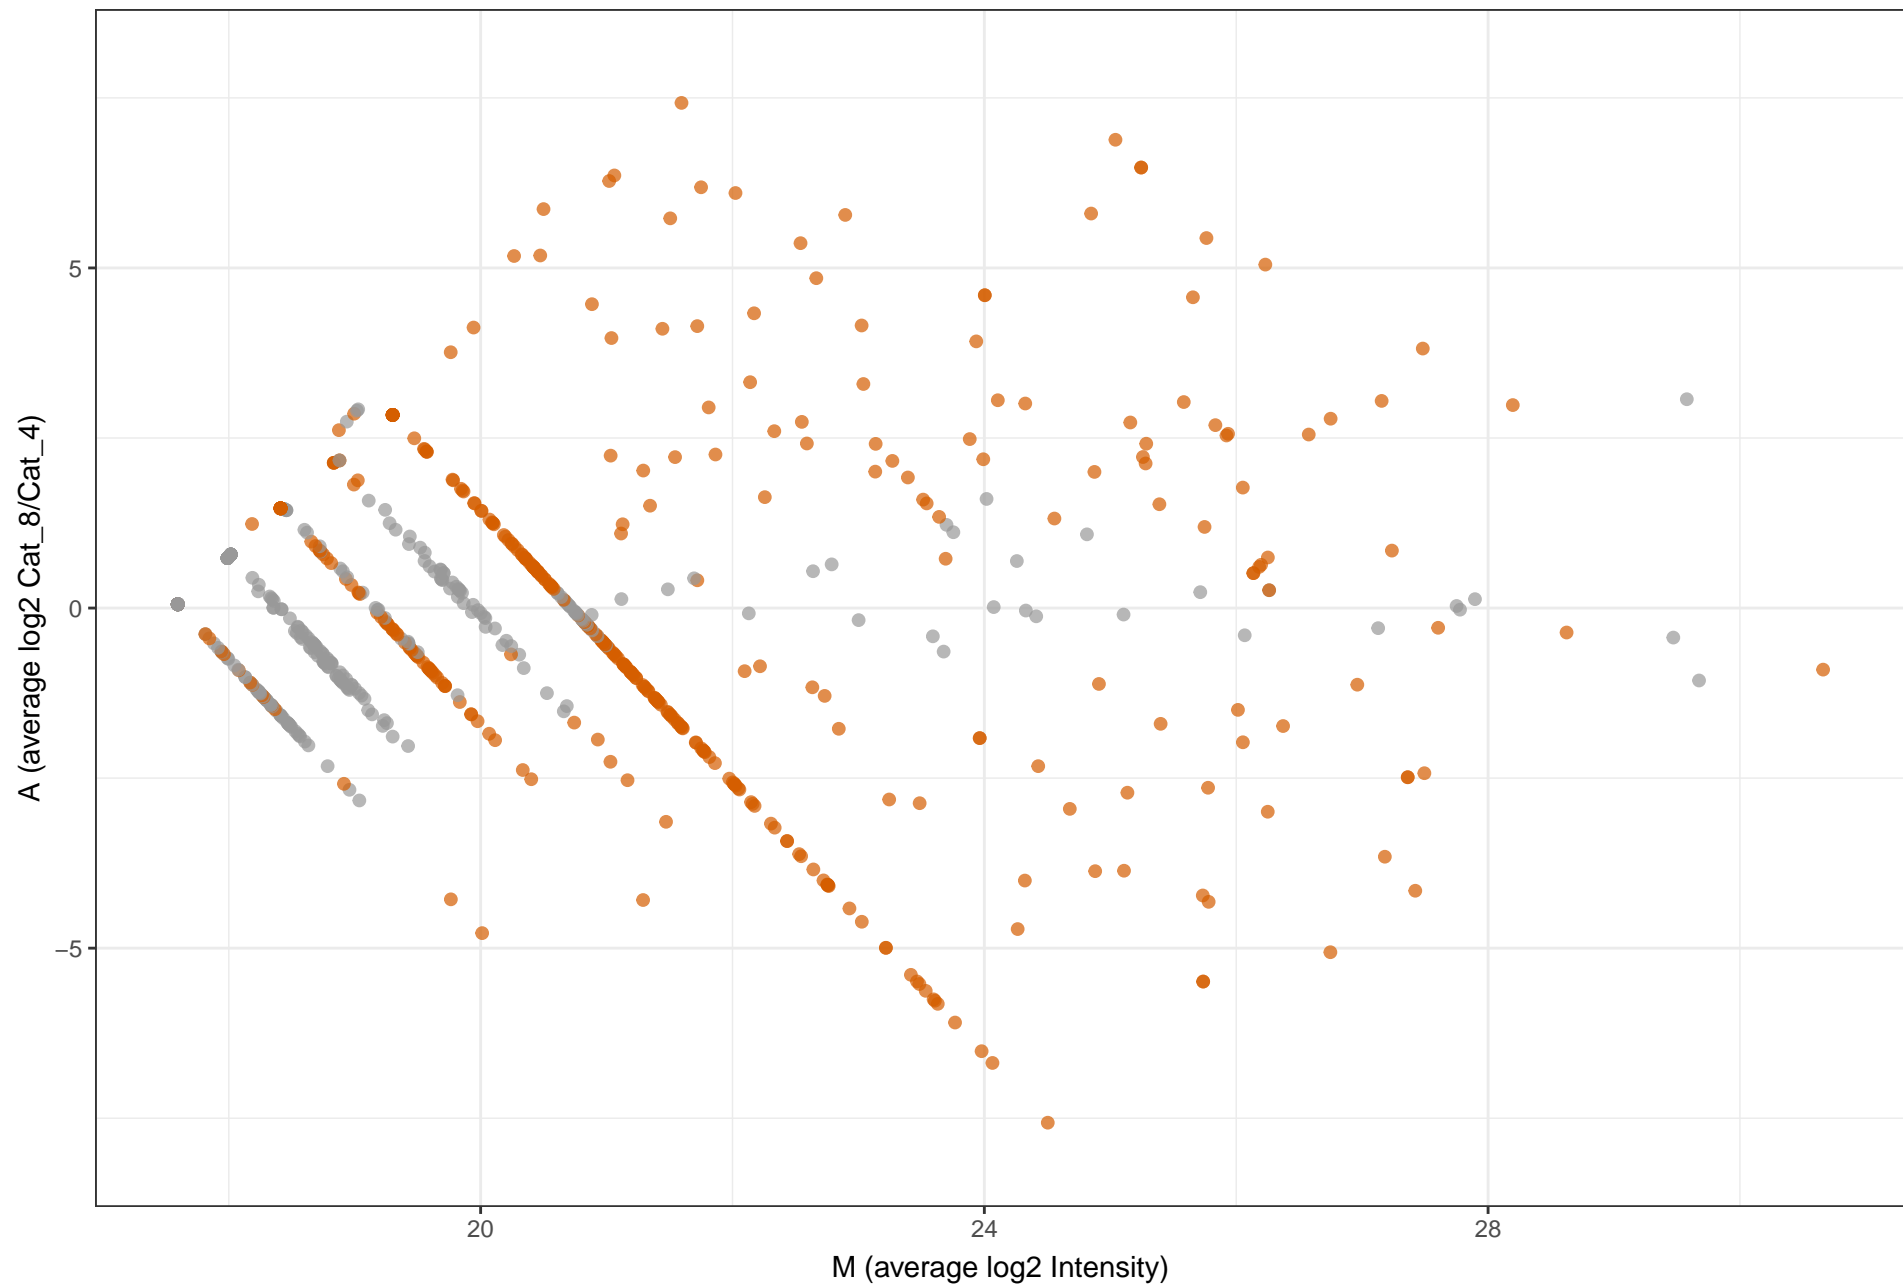

Supplement: supp [file elife-75798-supp-v1.zip]

**P-value vs Fold change**

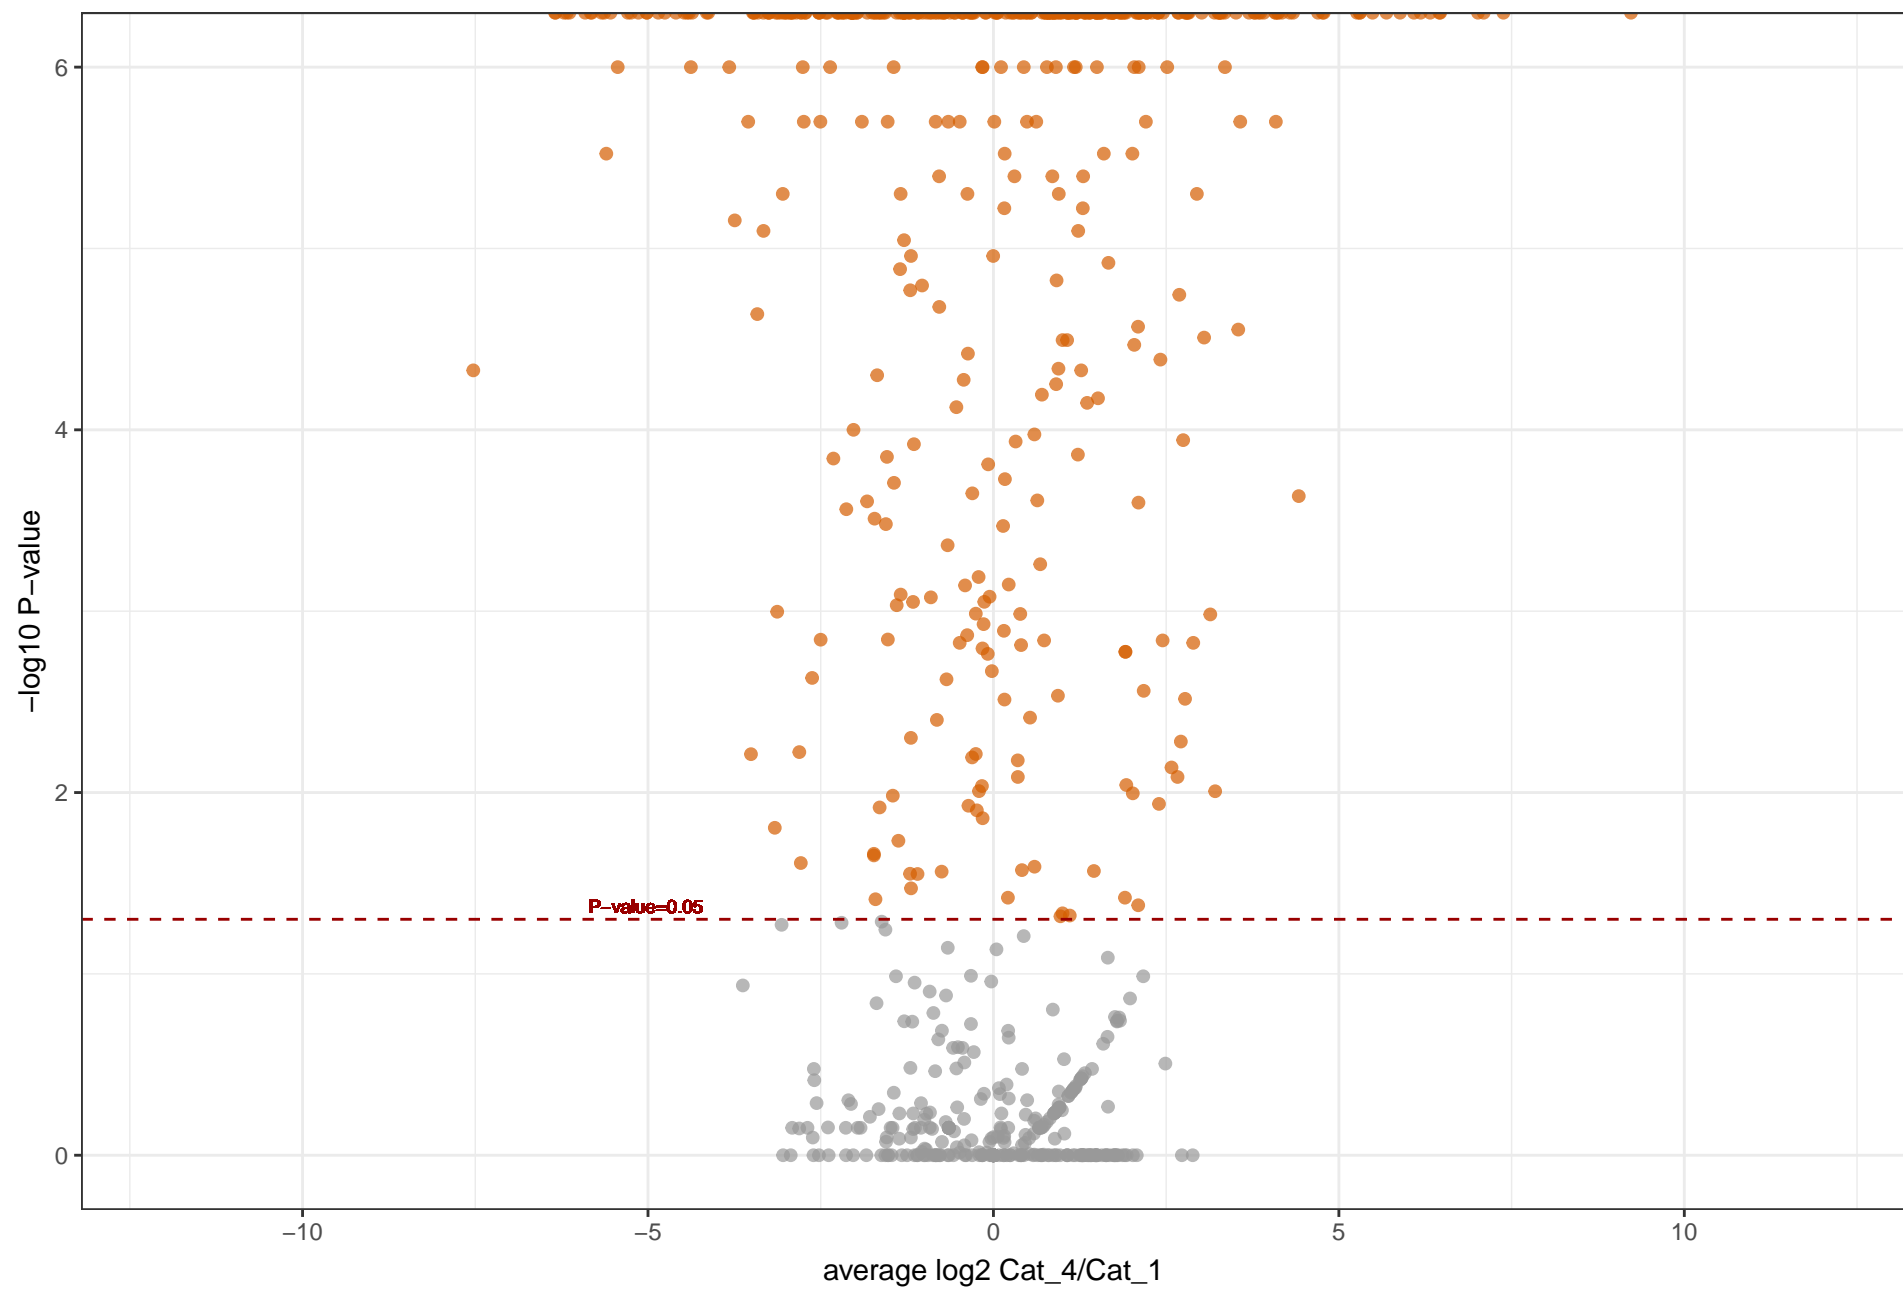

Supplement: supp [file elife-75798-supp-v1.zip]

Value-ordered fold change

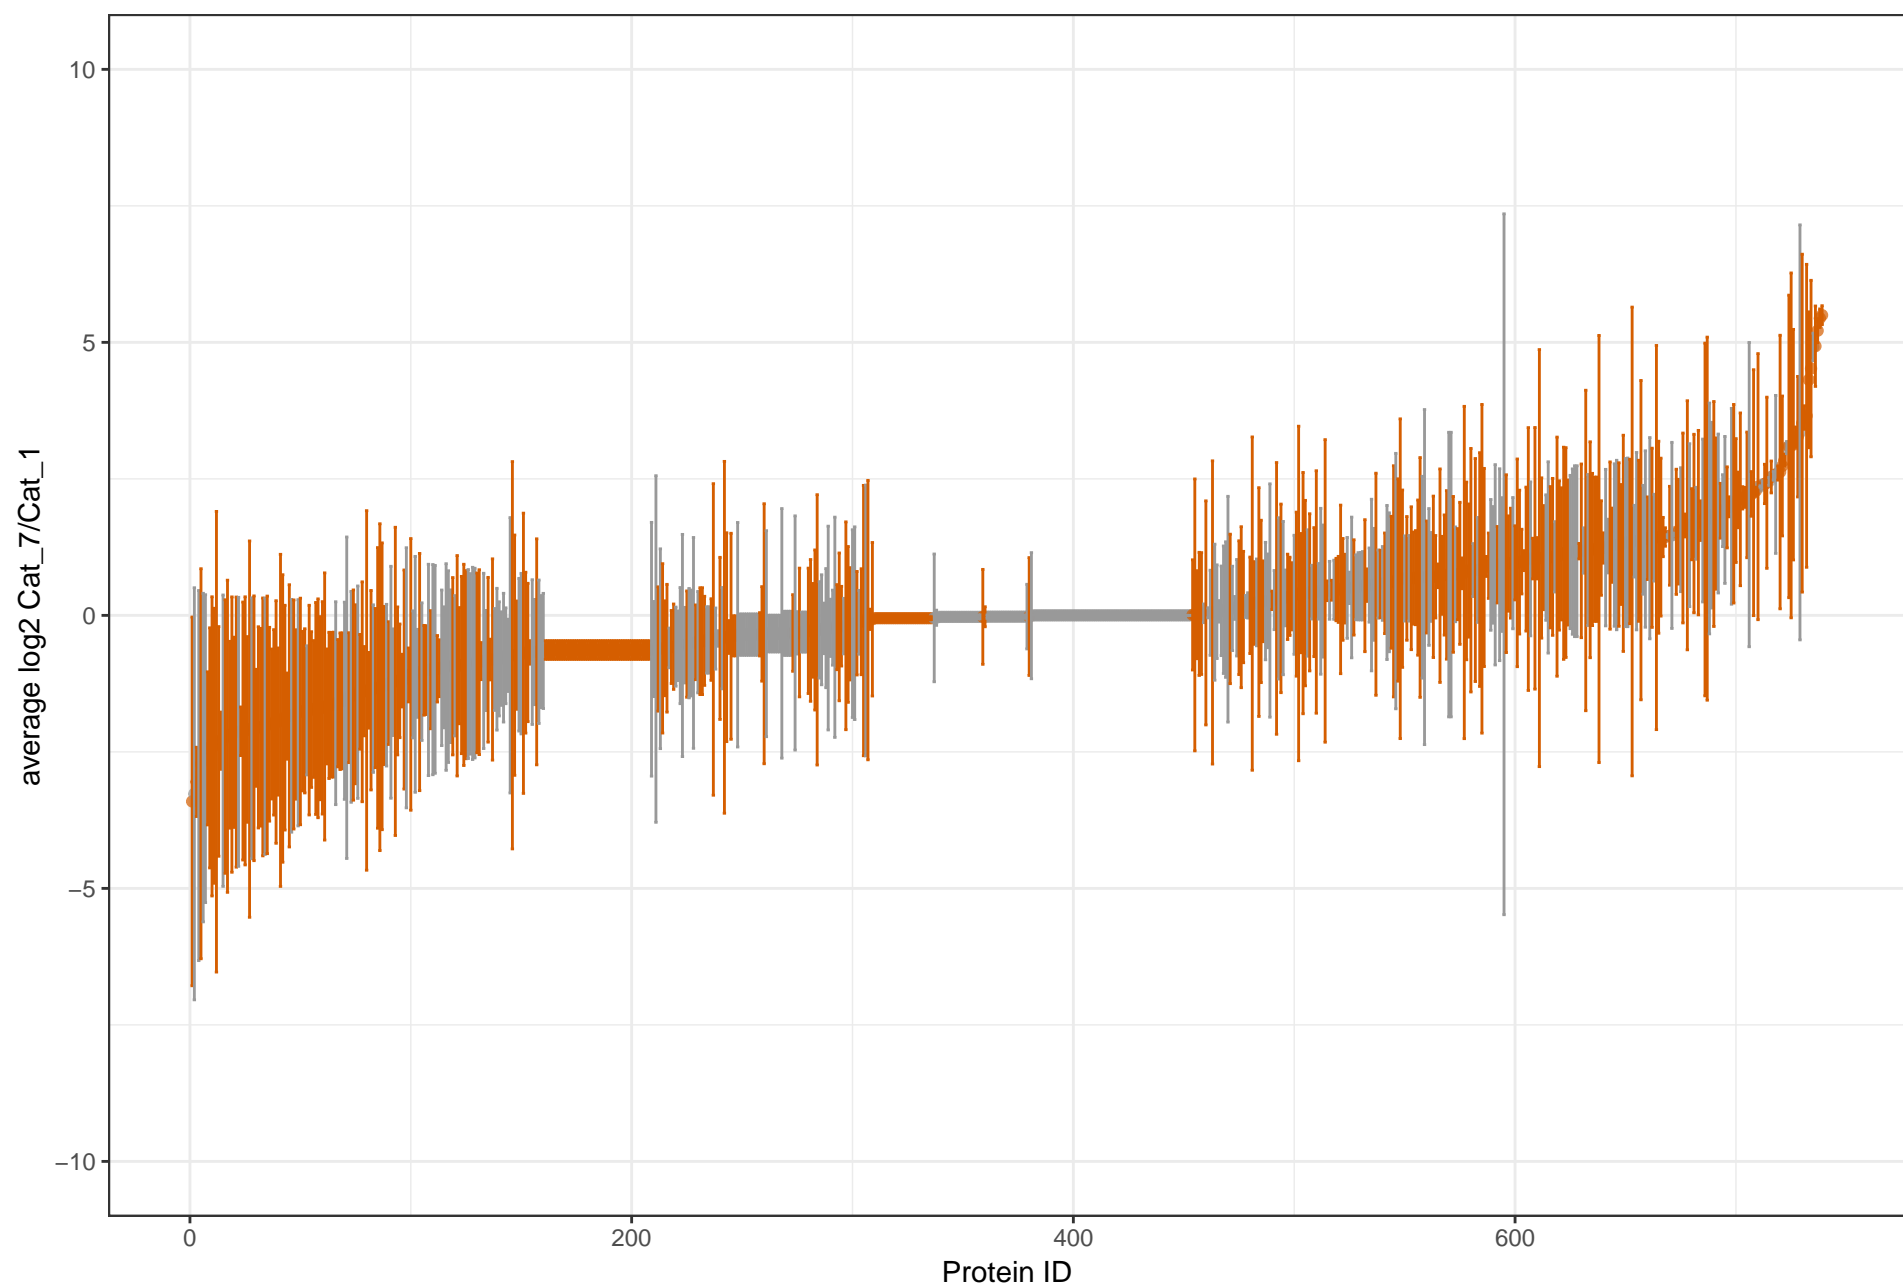

Supplement: supp [file elife-75798-supp-v1.zip]

**P-value vs Fold change**

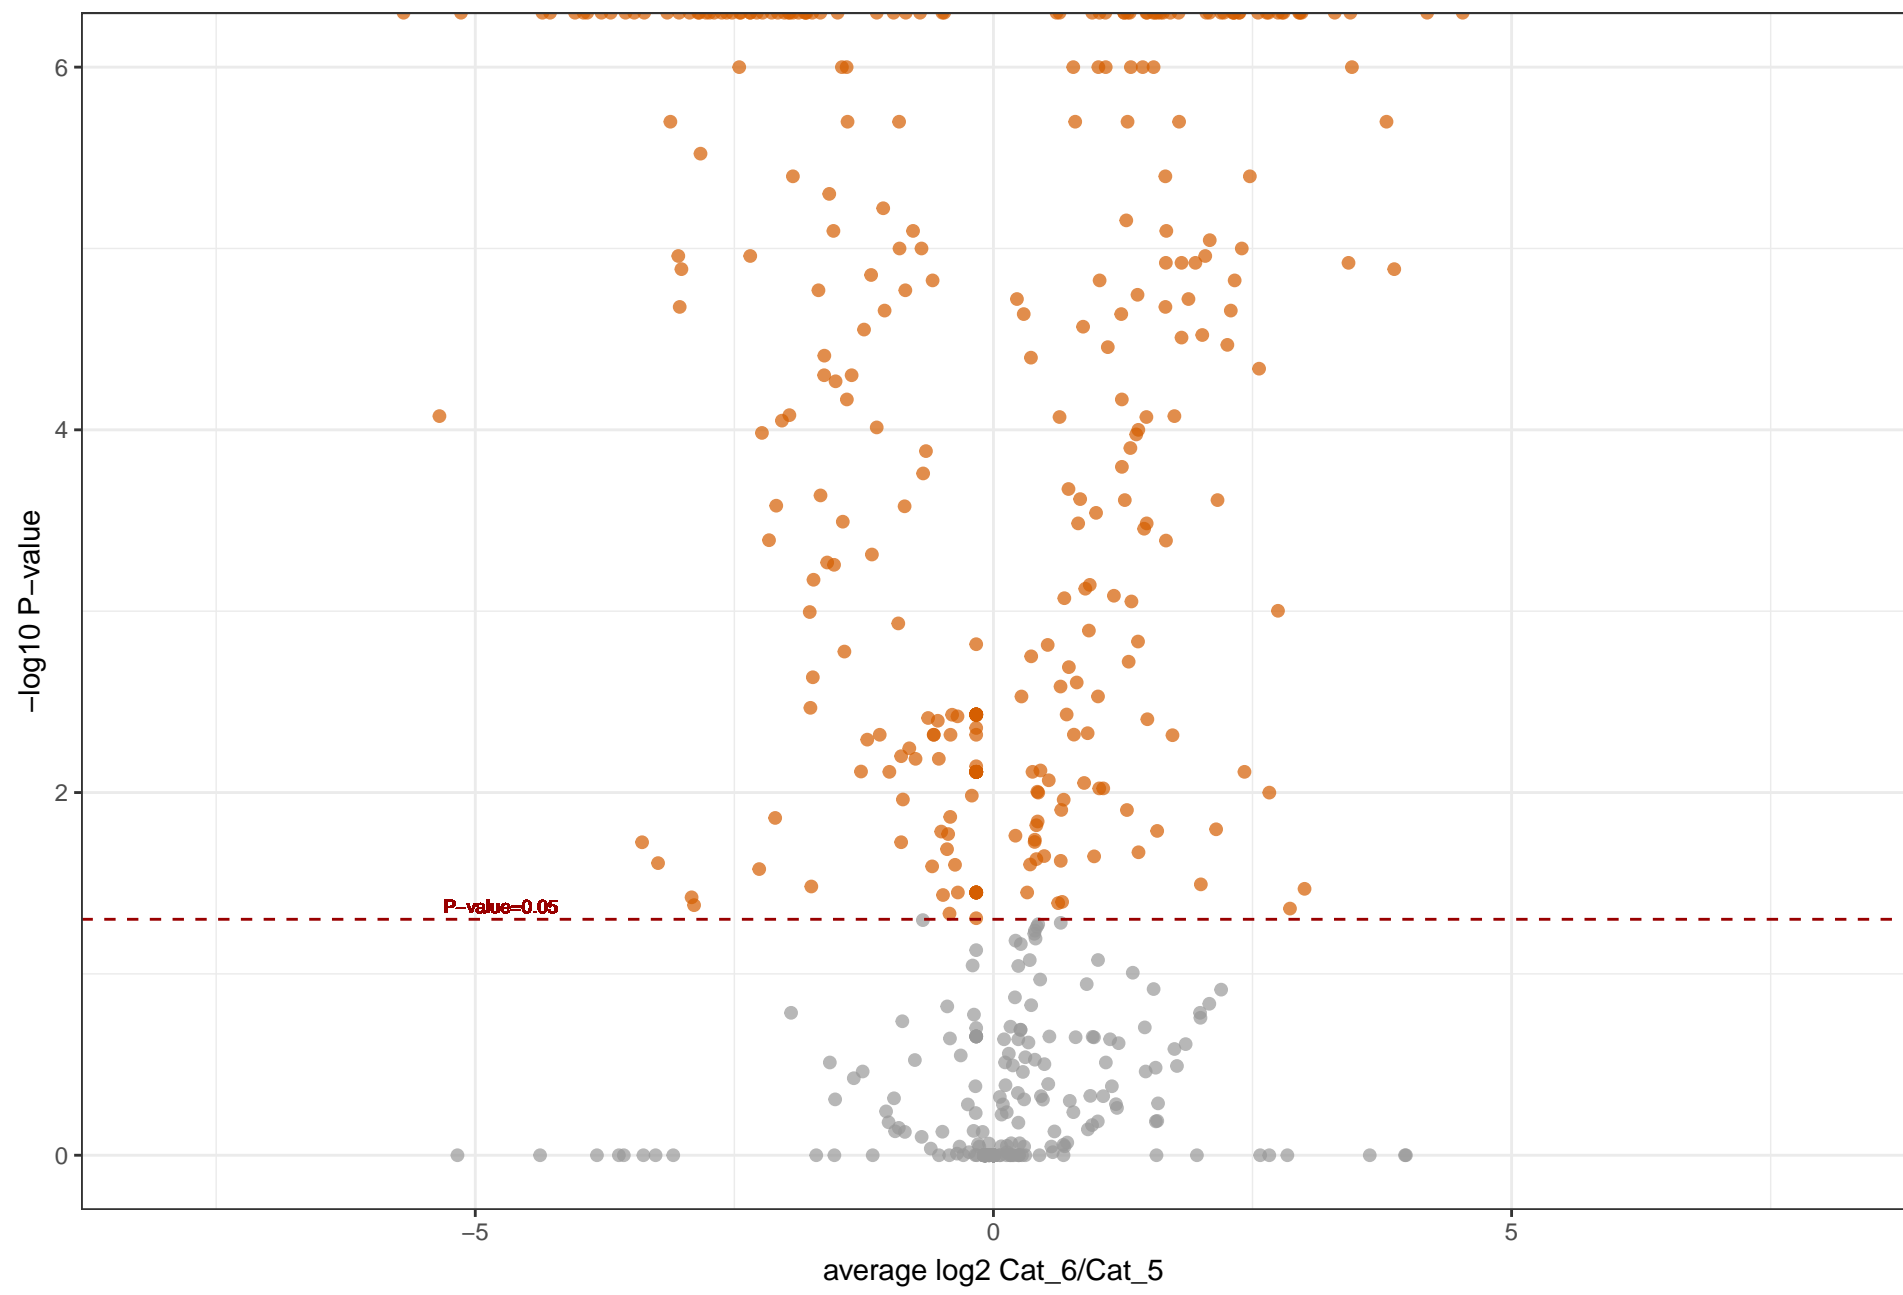

Supplement: supp [file elife-75798-supp-v1.zip]

Value-ordered fold change

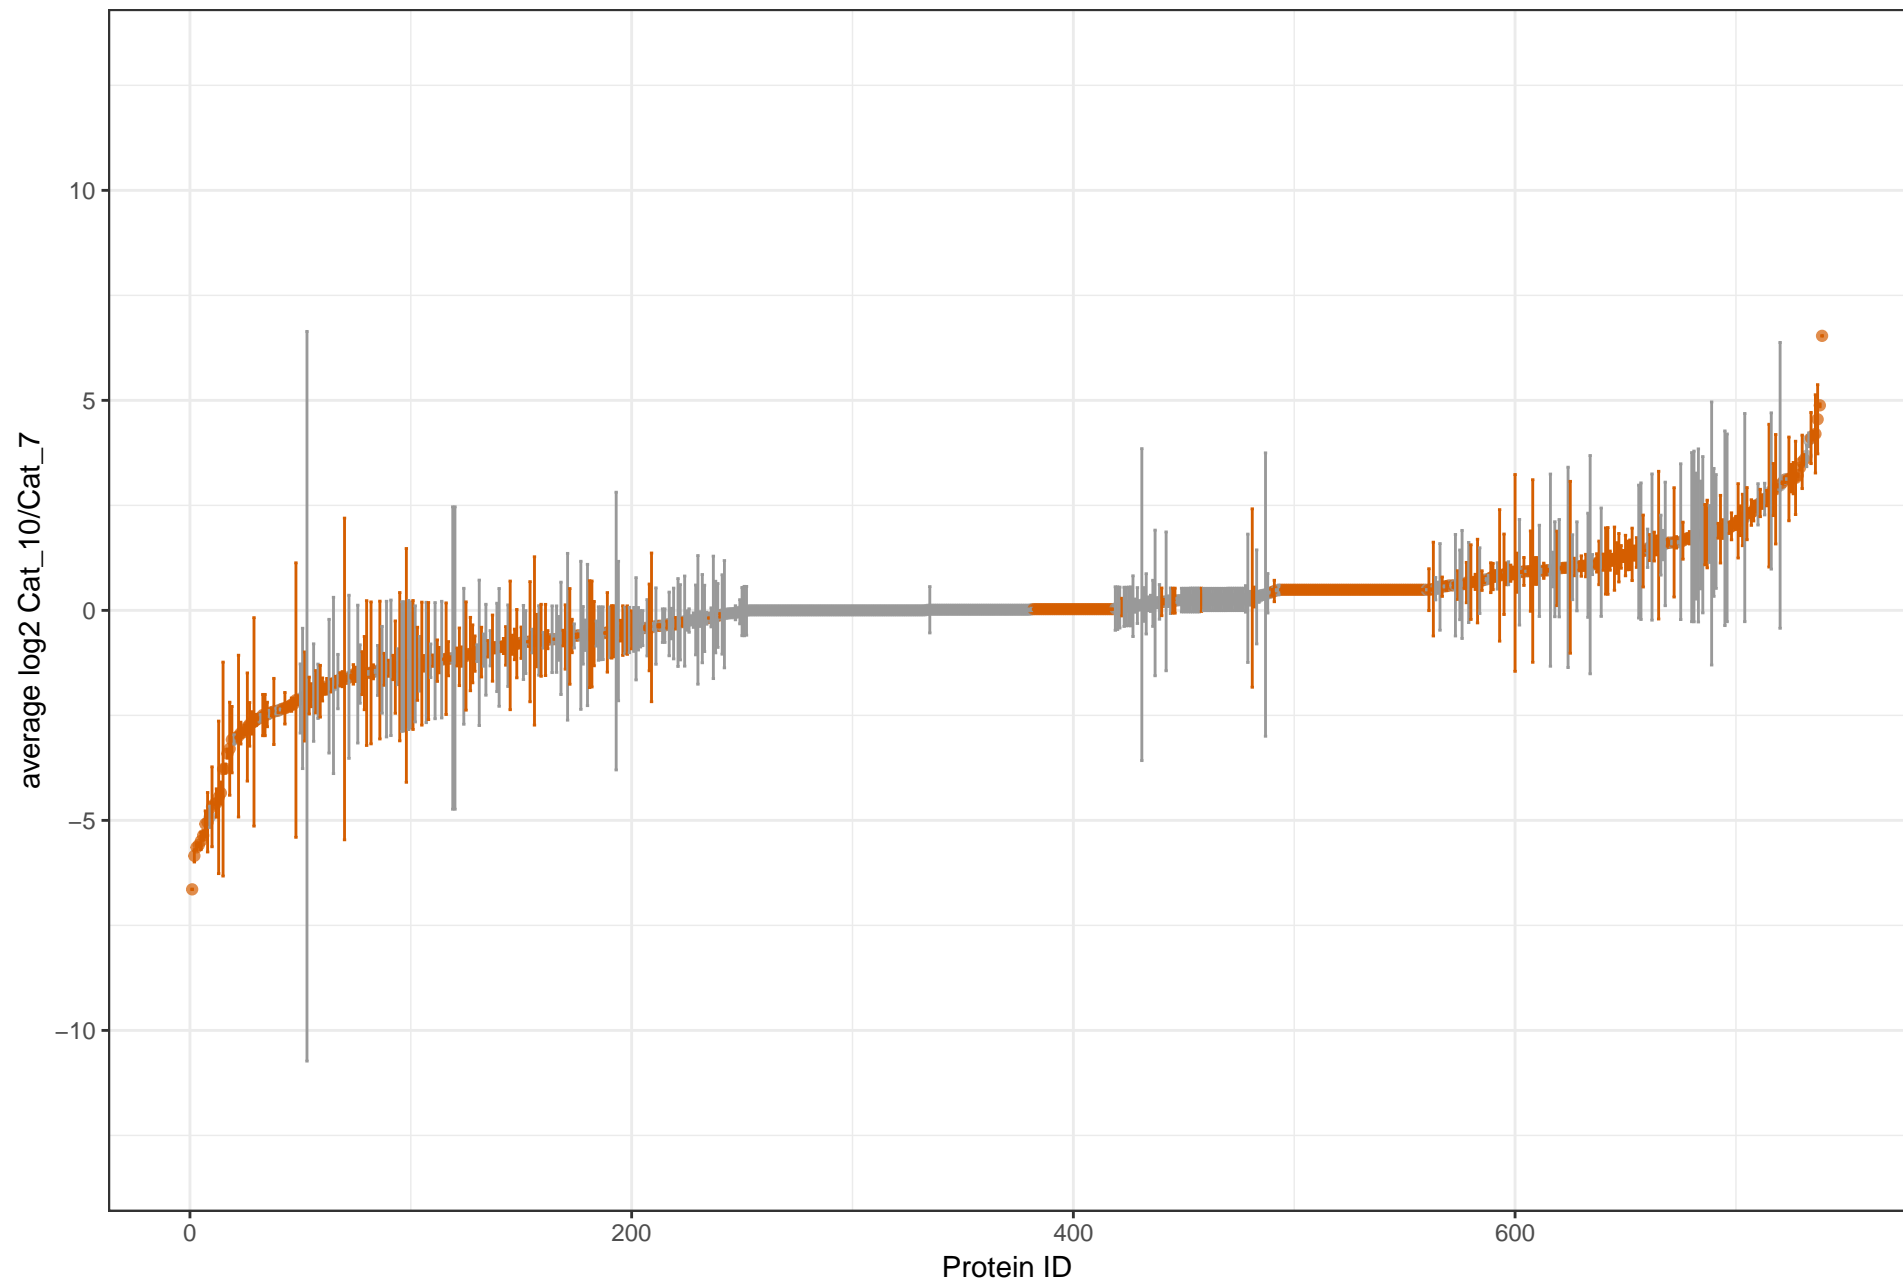

Supplement: supp [file elife-75798-supp-v1.zip]

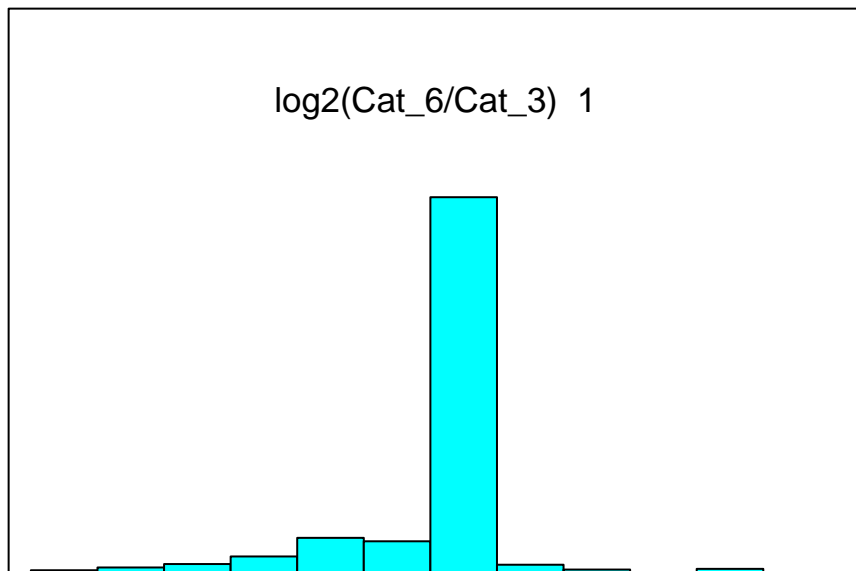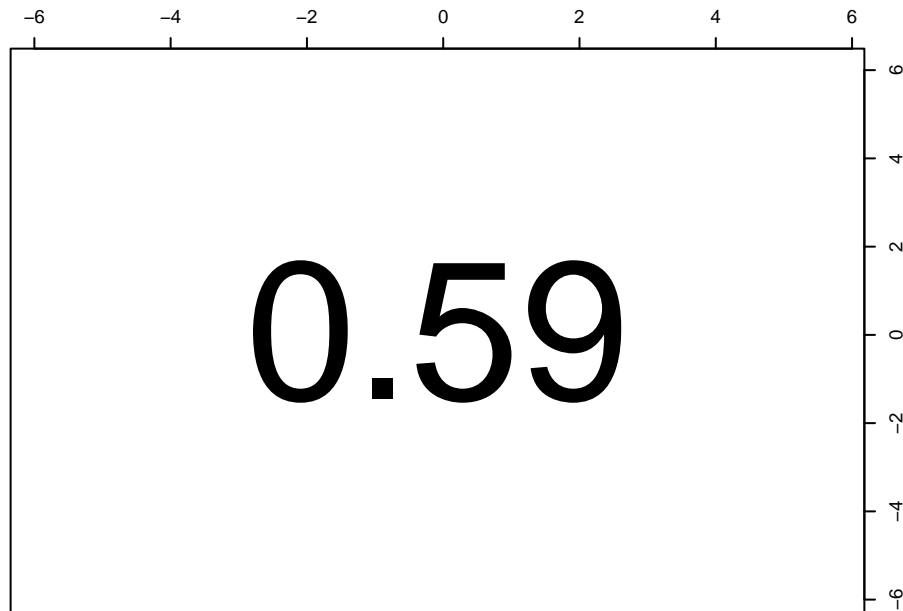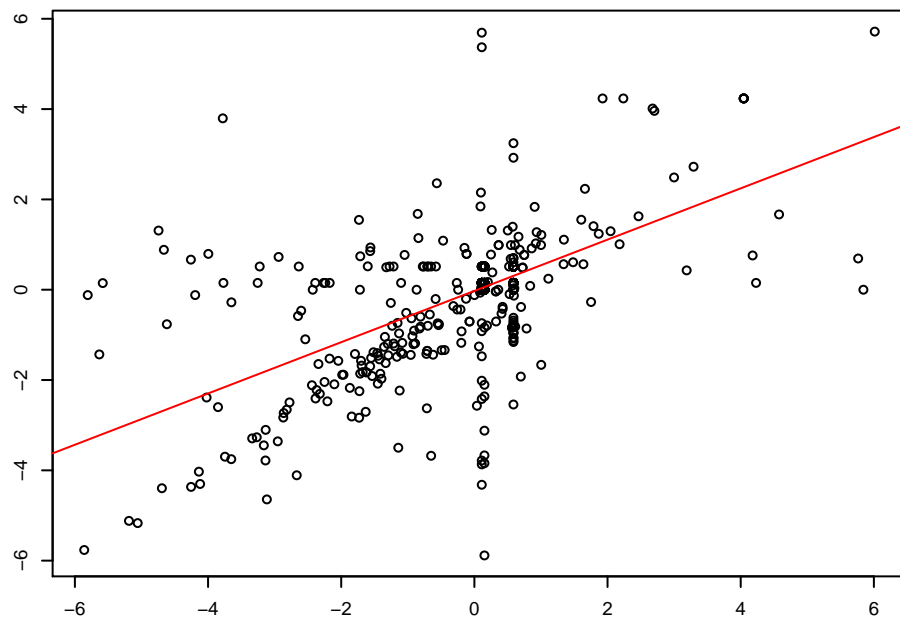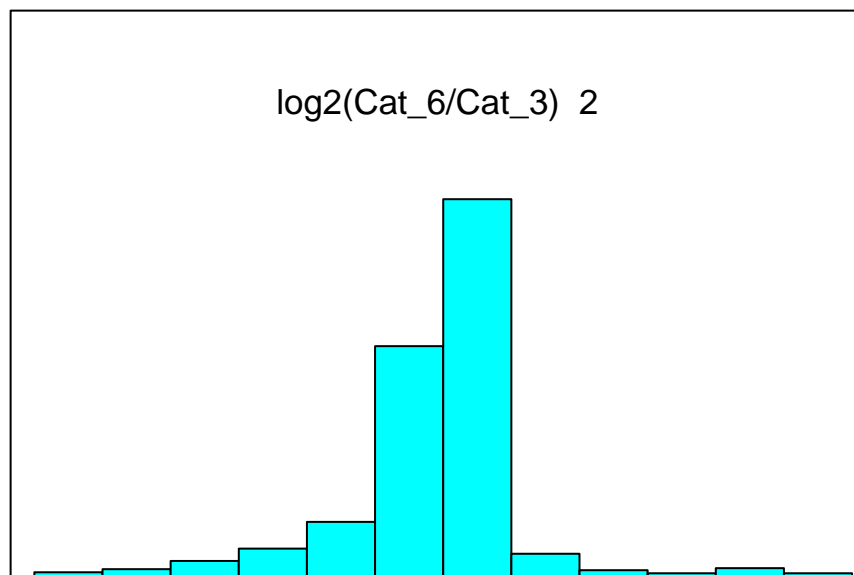

Supplement: supp [file elife-75798-supp-v1.zip]

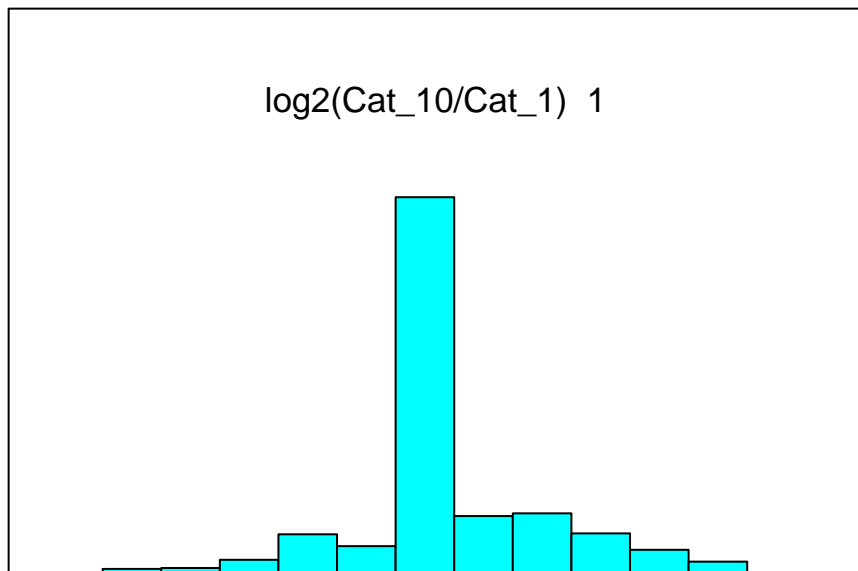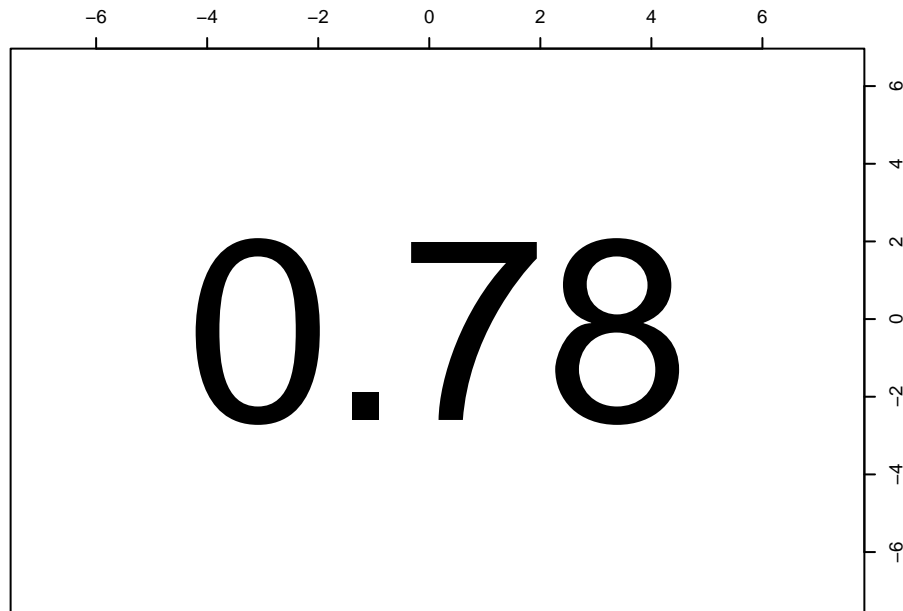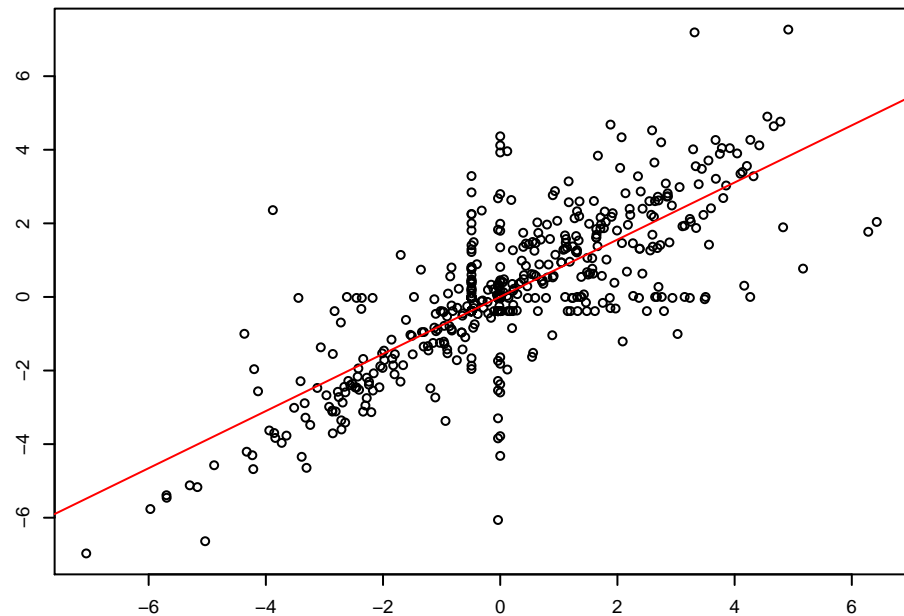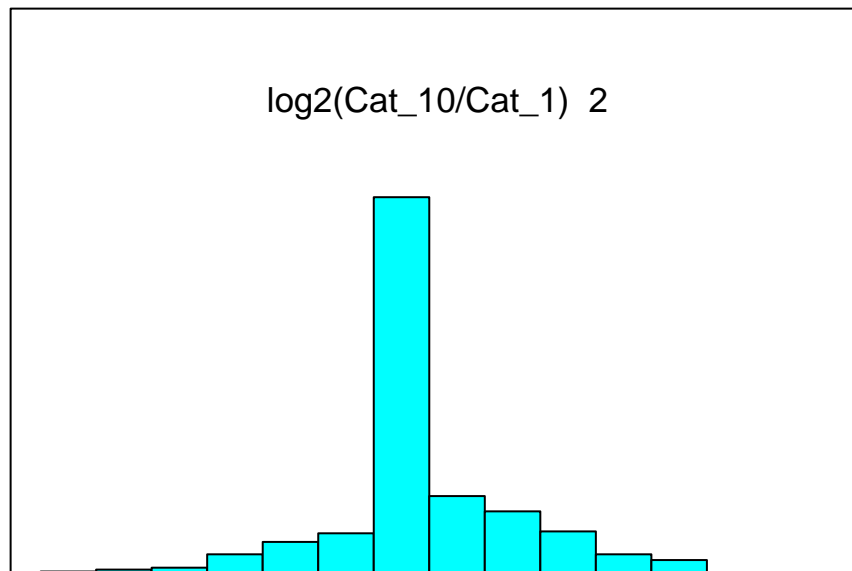

Supplement: supp [file elife-75798-supp-v1.zip]

P-value vs Fold change

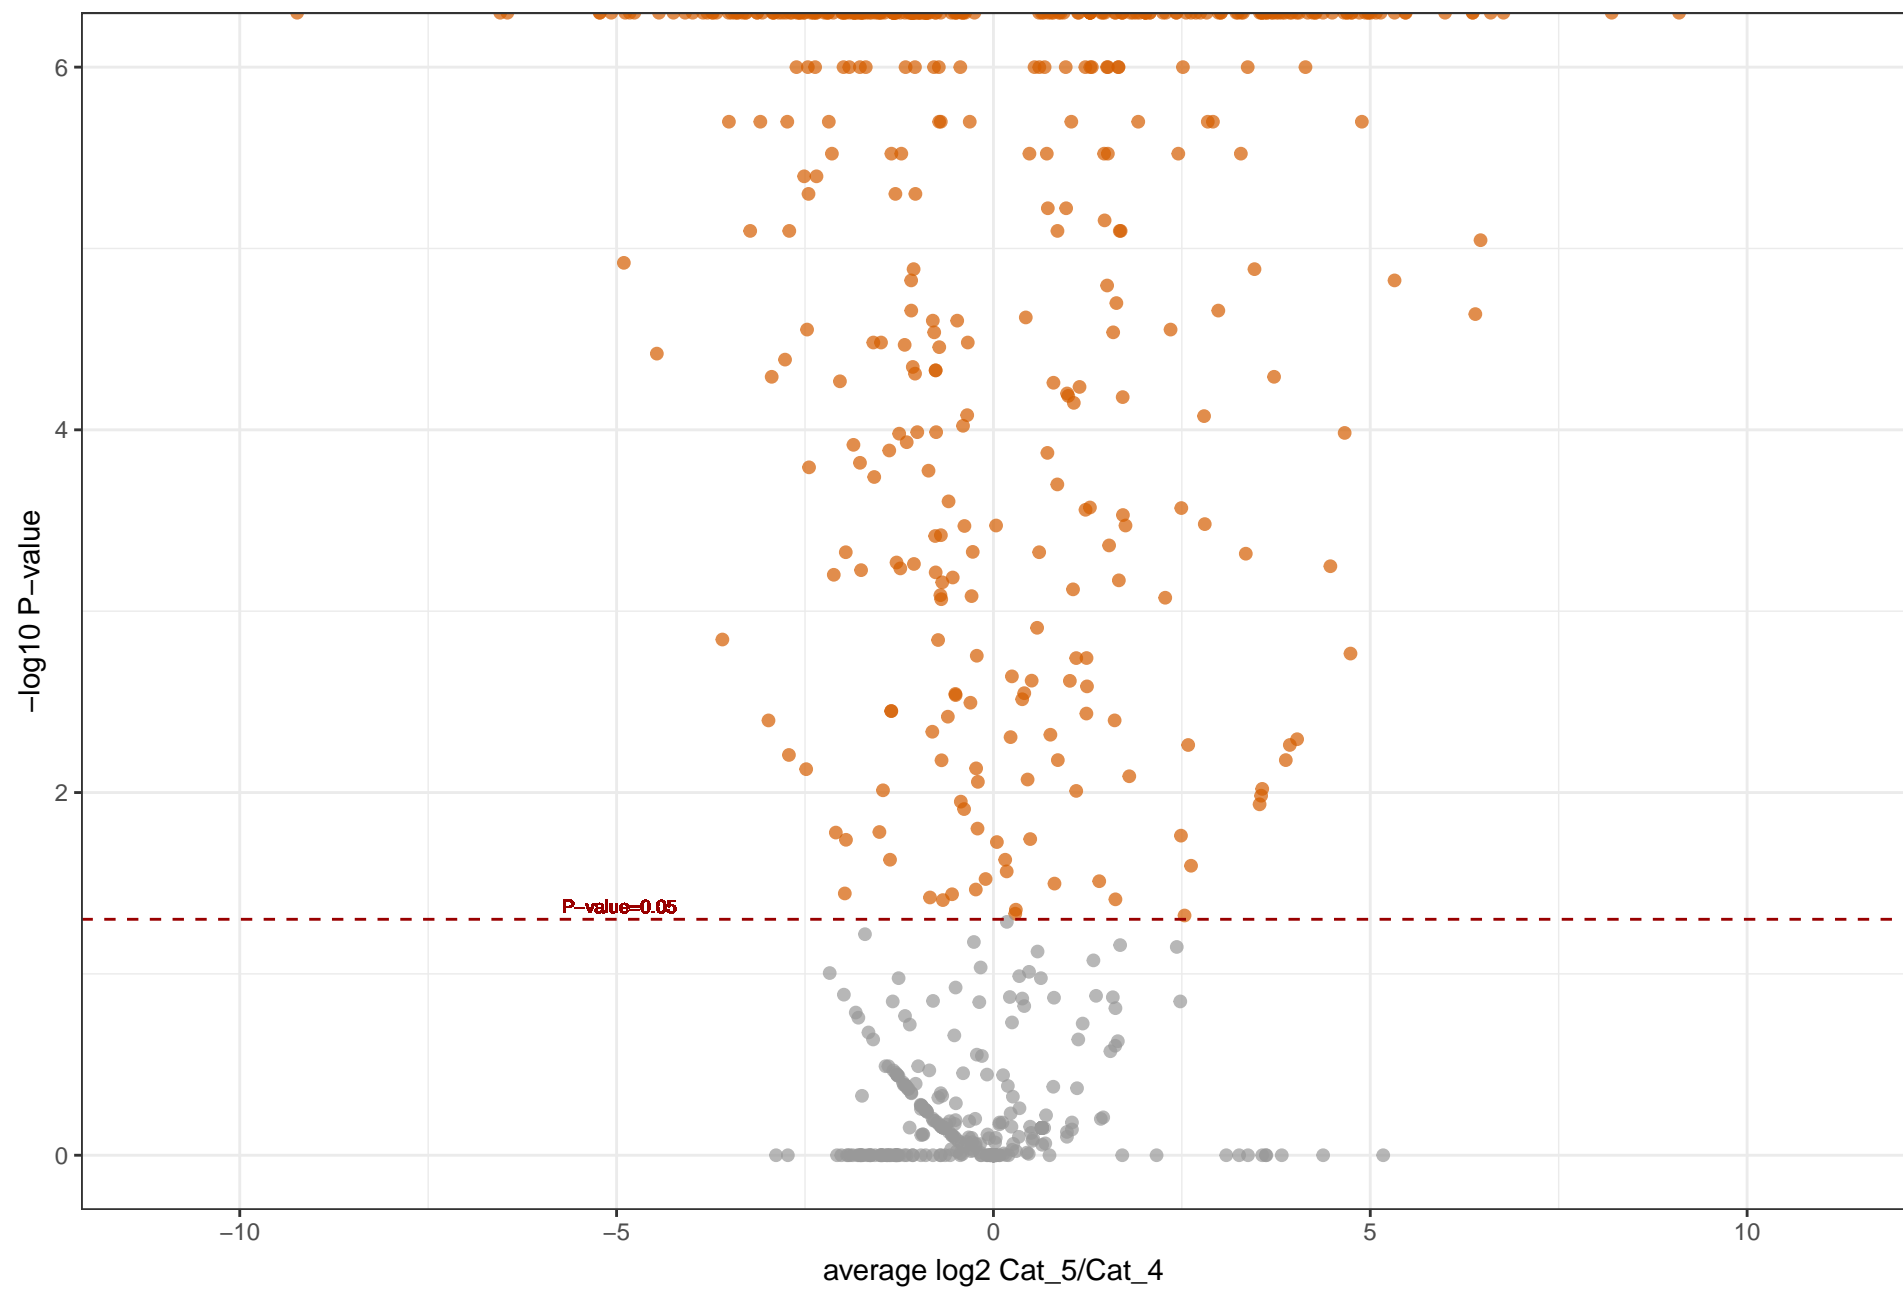

Supplement: supp [file elife-75798-supp-v1.zip]

Value-ordered fold change

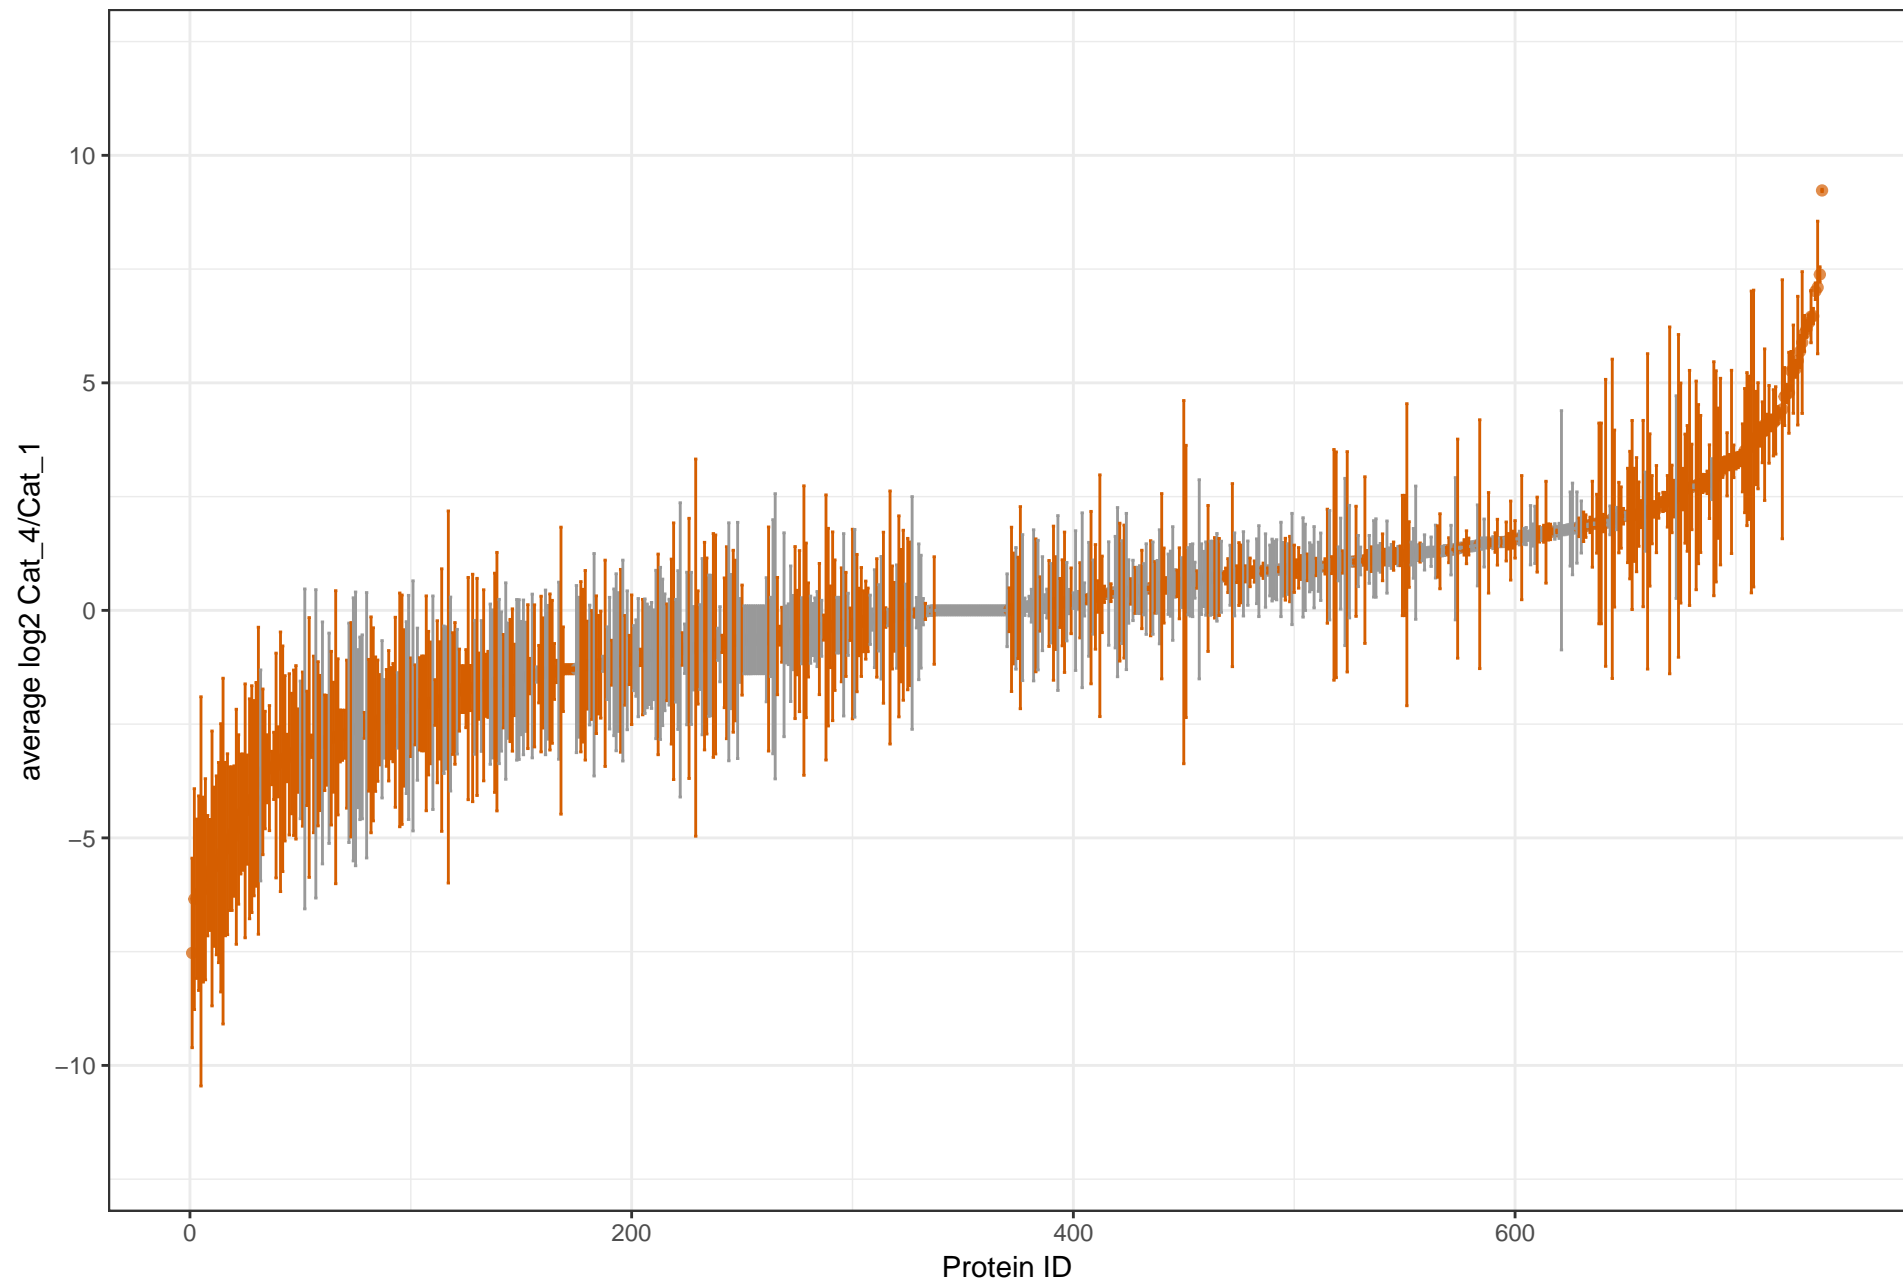

Supplement: supp [file elife-75798-supp-v1.zip]

MA plot

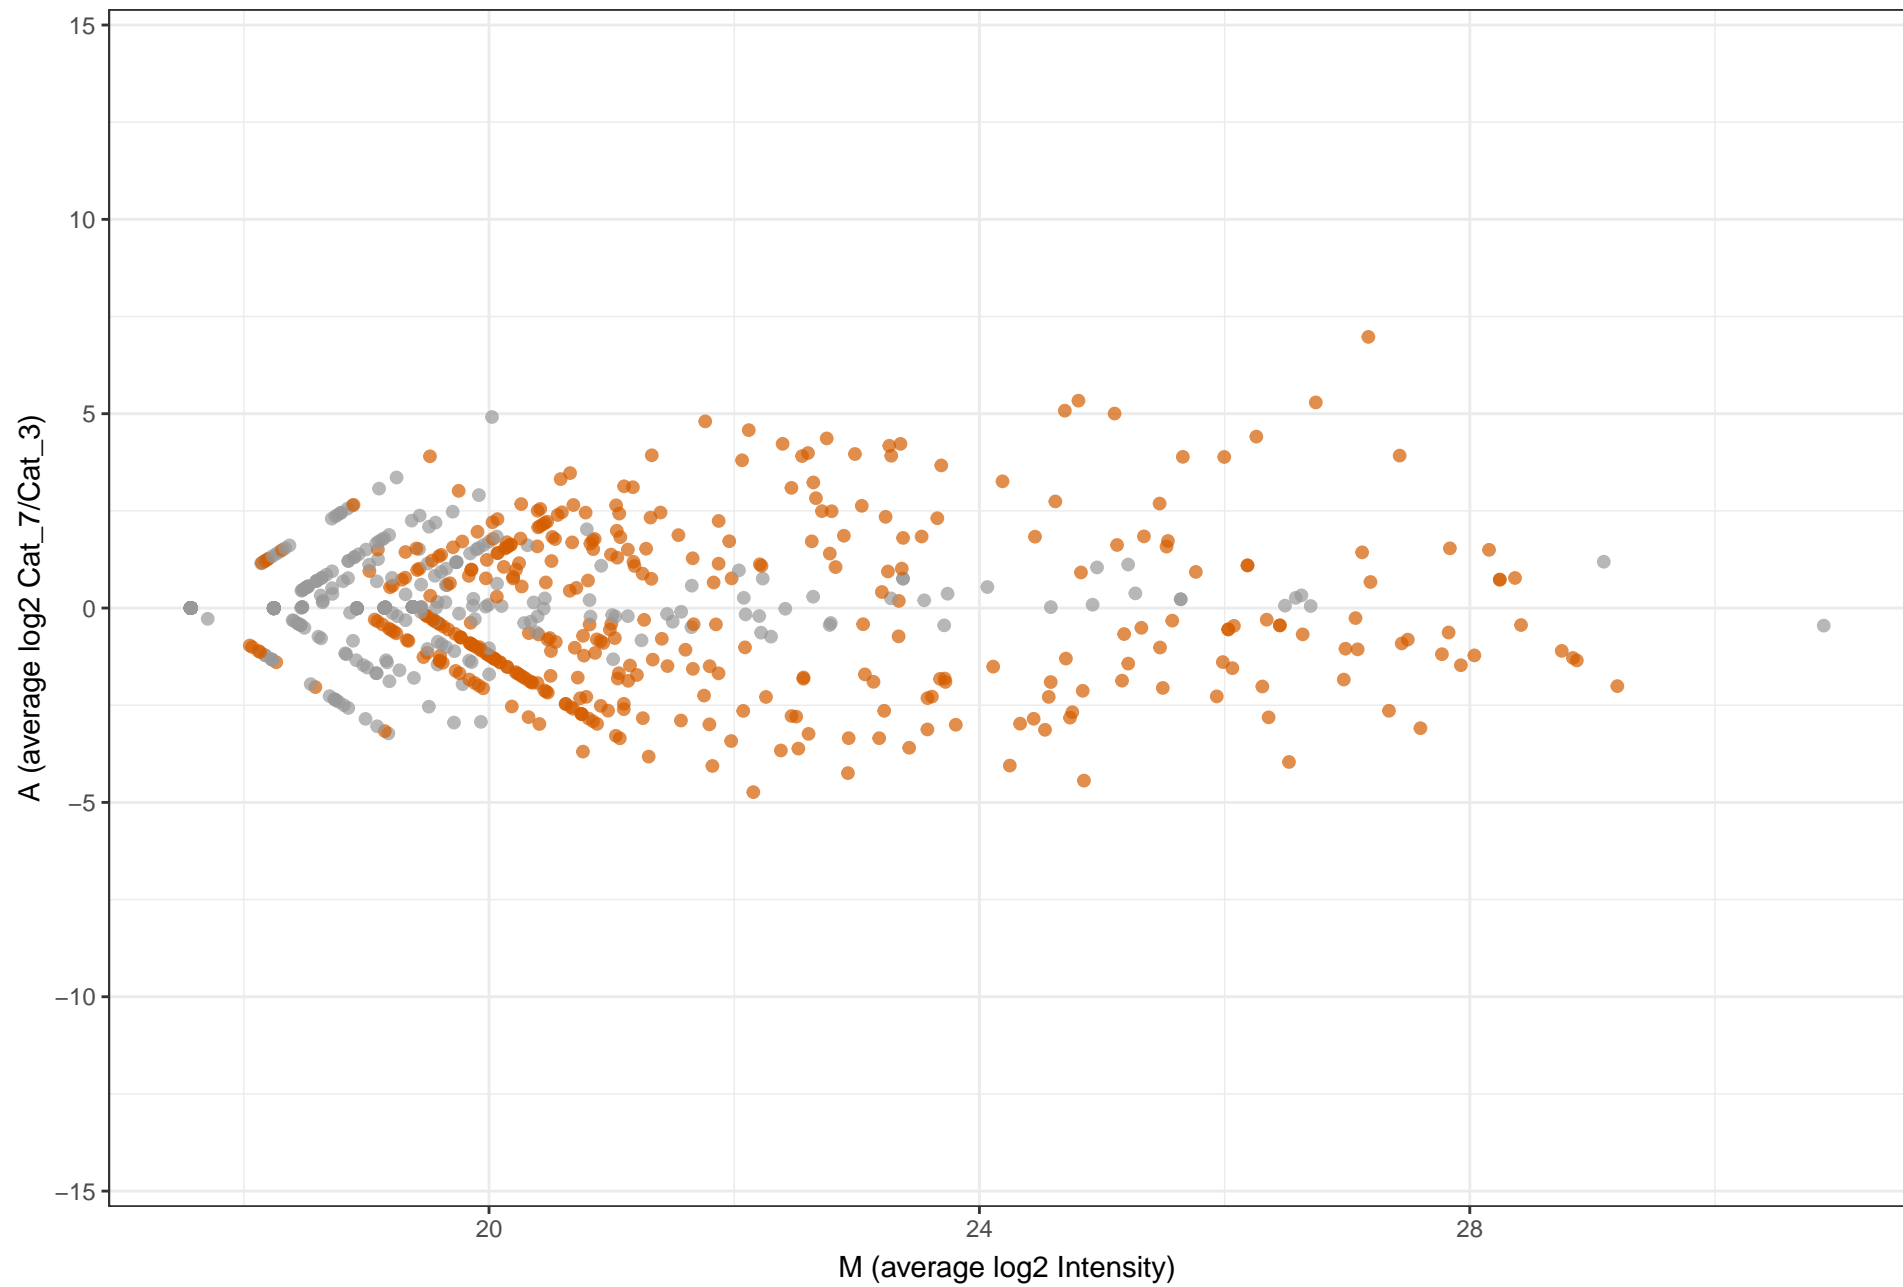

Supplement: supp [file elife-75798-supp-v1.zip]

Value-ordered fold change

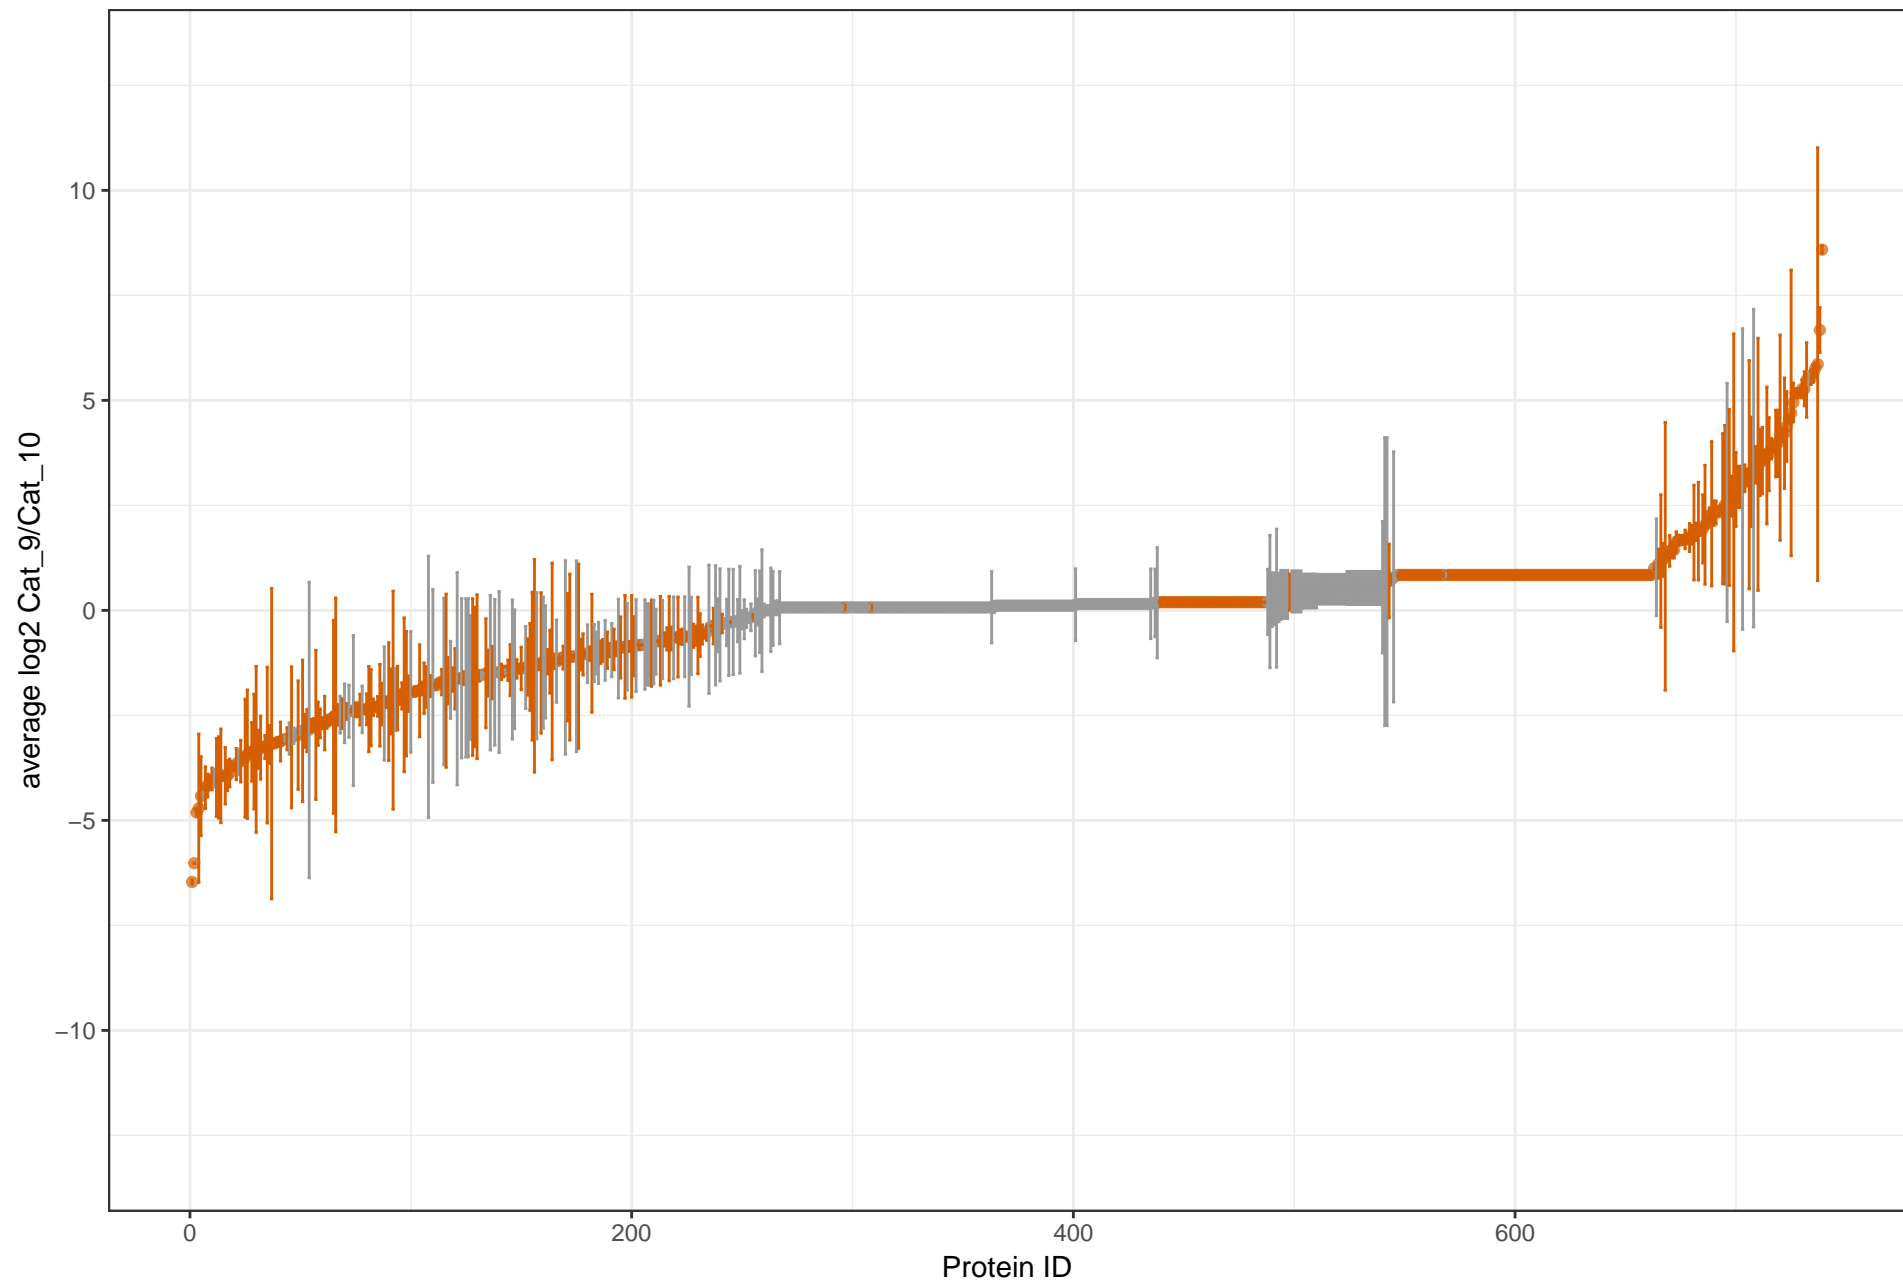

Supplement: supp [file elife-75798-supp-v1.zip]

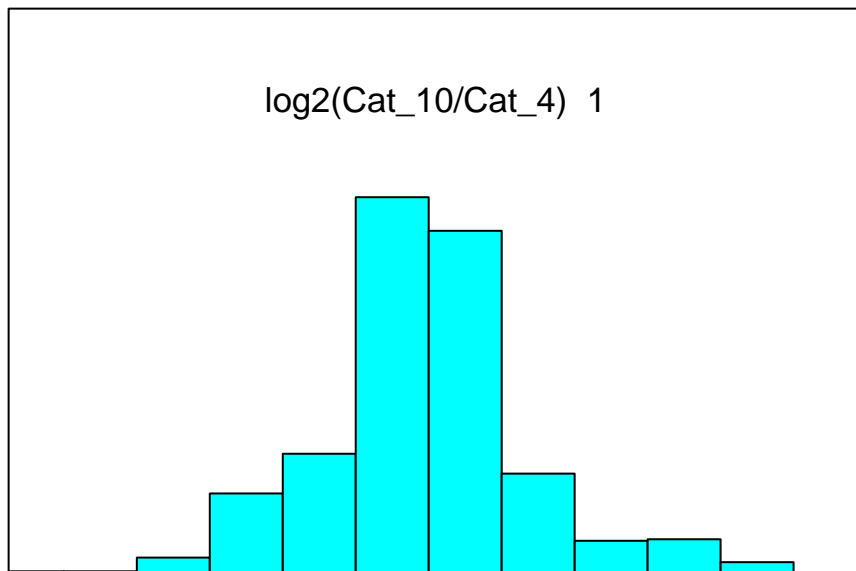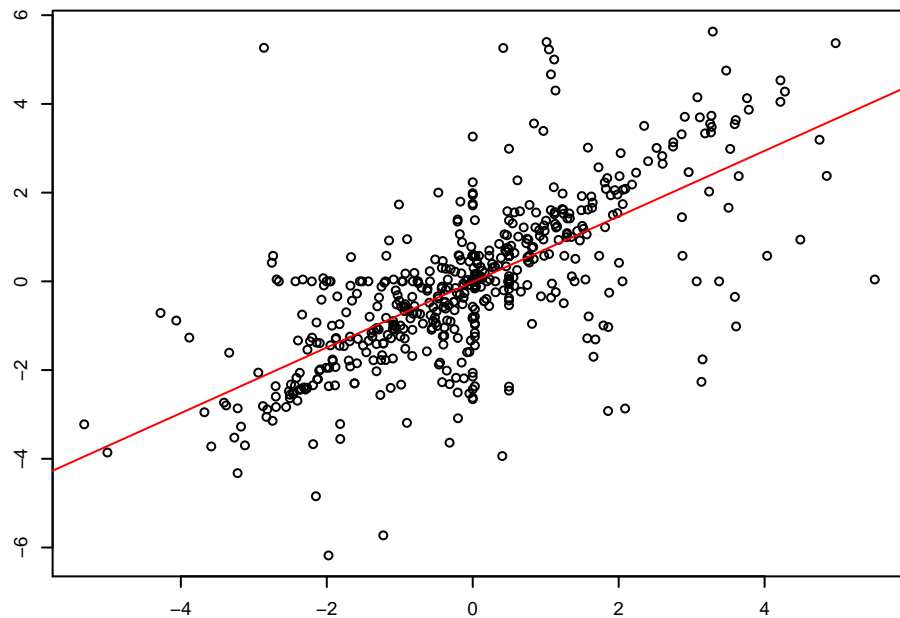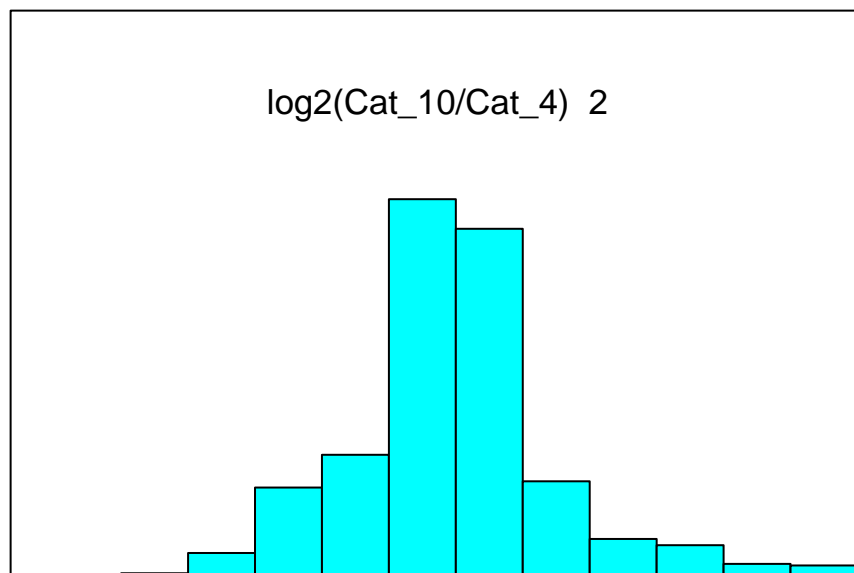

Supplement: supp [file elife-75798-supp-v1.zip]

P-value vs Fold change

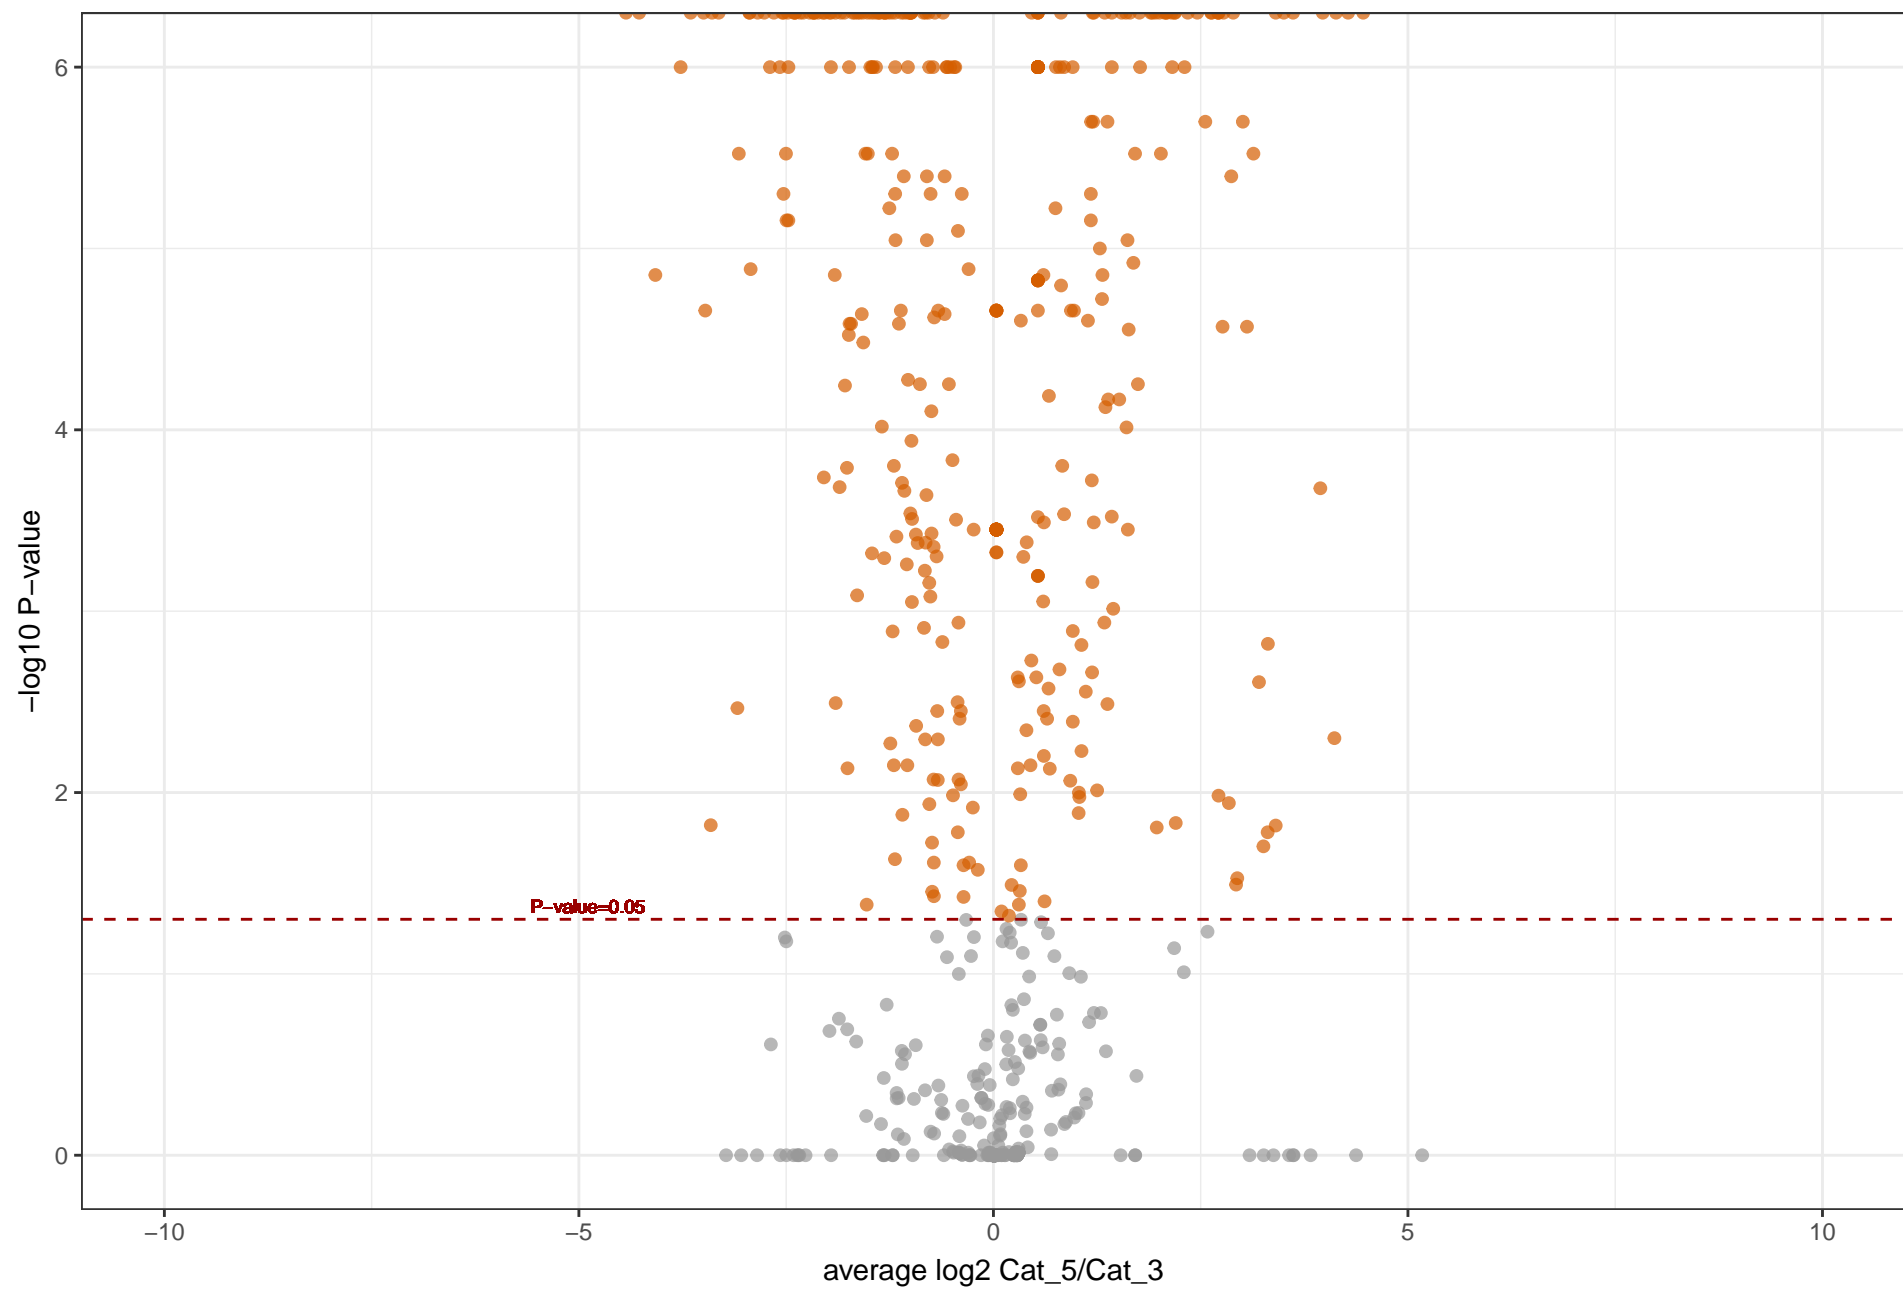

Supplement: supp [file elife-75798-supp-v1.zip]
