# Supplementary figures and images for: Inhibiting host-protein deposition on urinary catheters reduces associated urinary tract infections (part 2 of 2)
Source: eLife journal article supplement (doi:10.7554/elife.75798), 2022-03-26

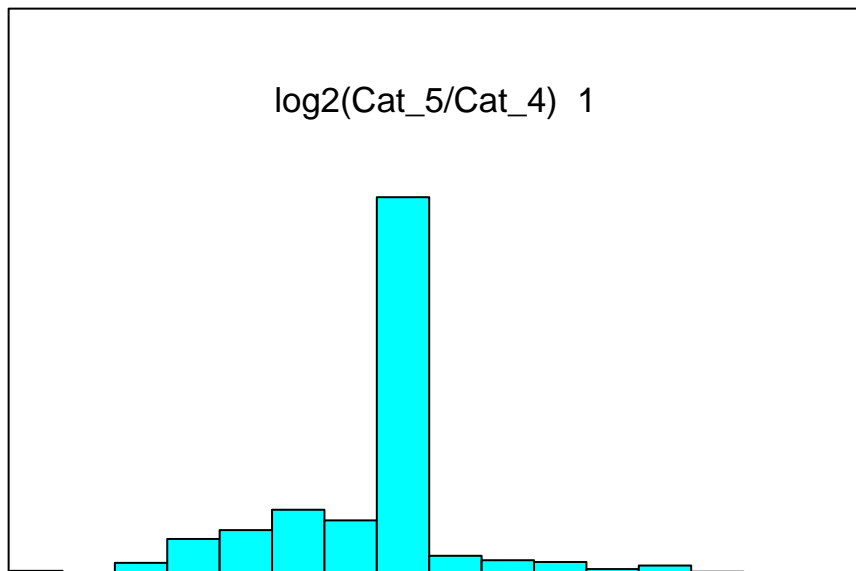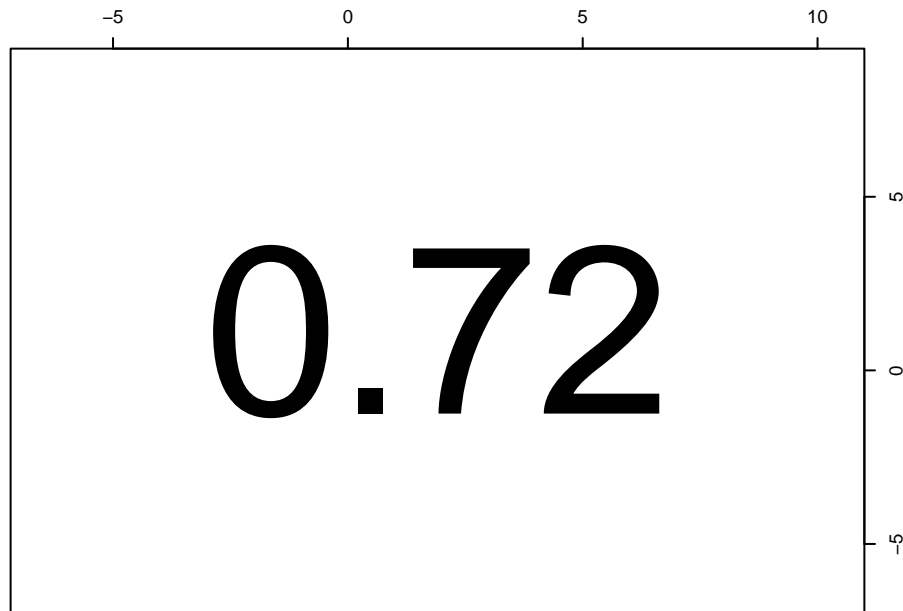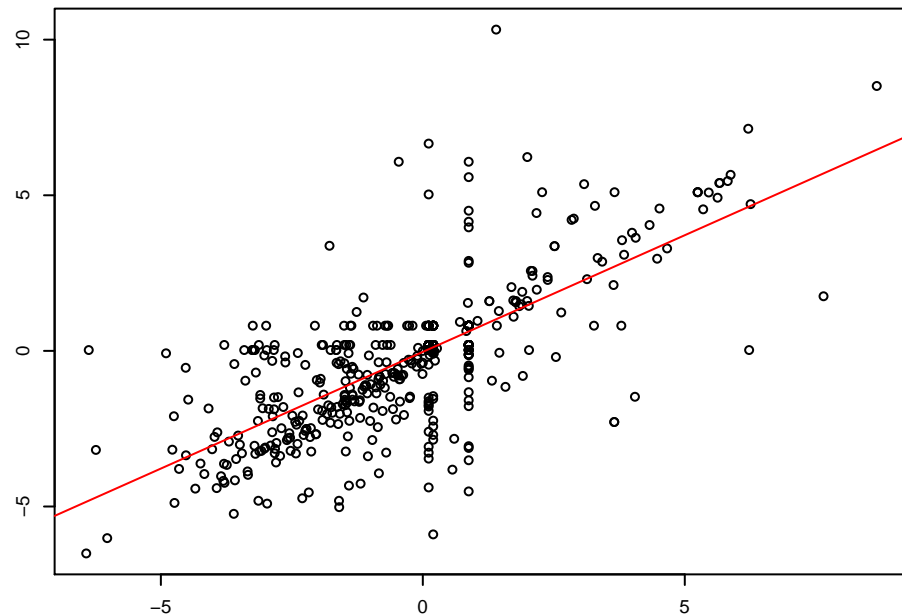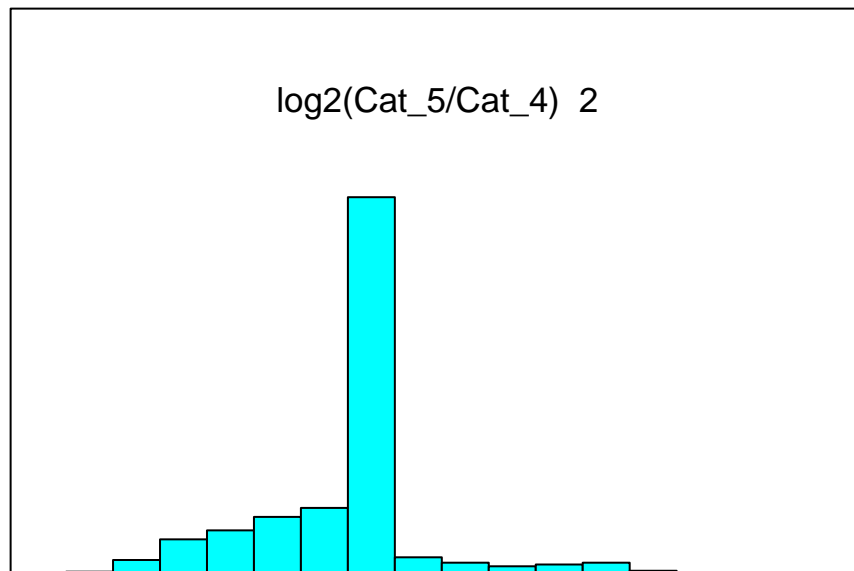

Supplement: supp [file elife-75798-supp-v1.zip]

MA plot

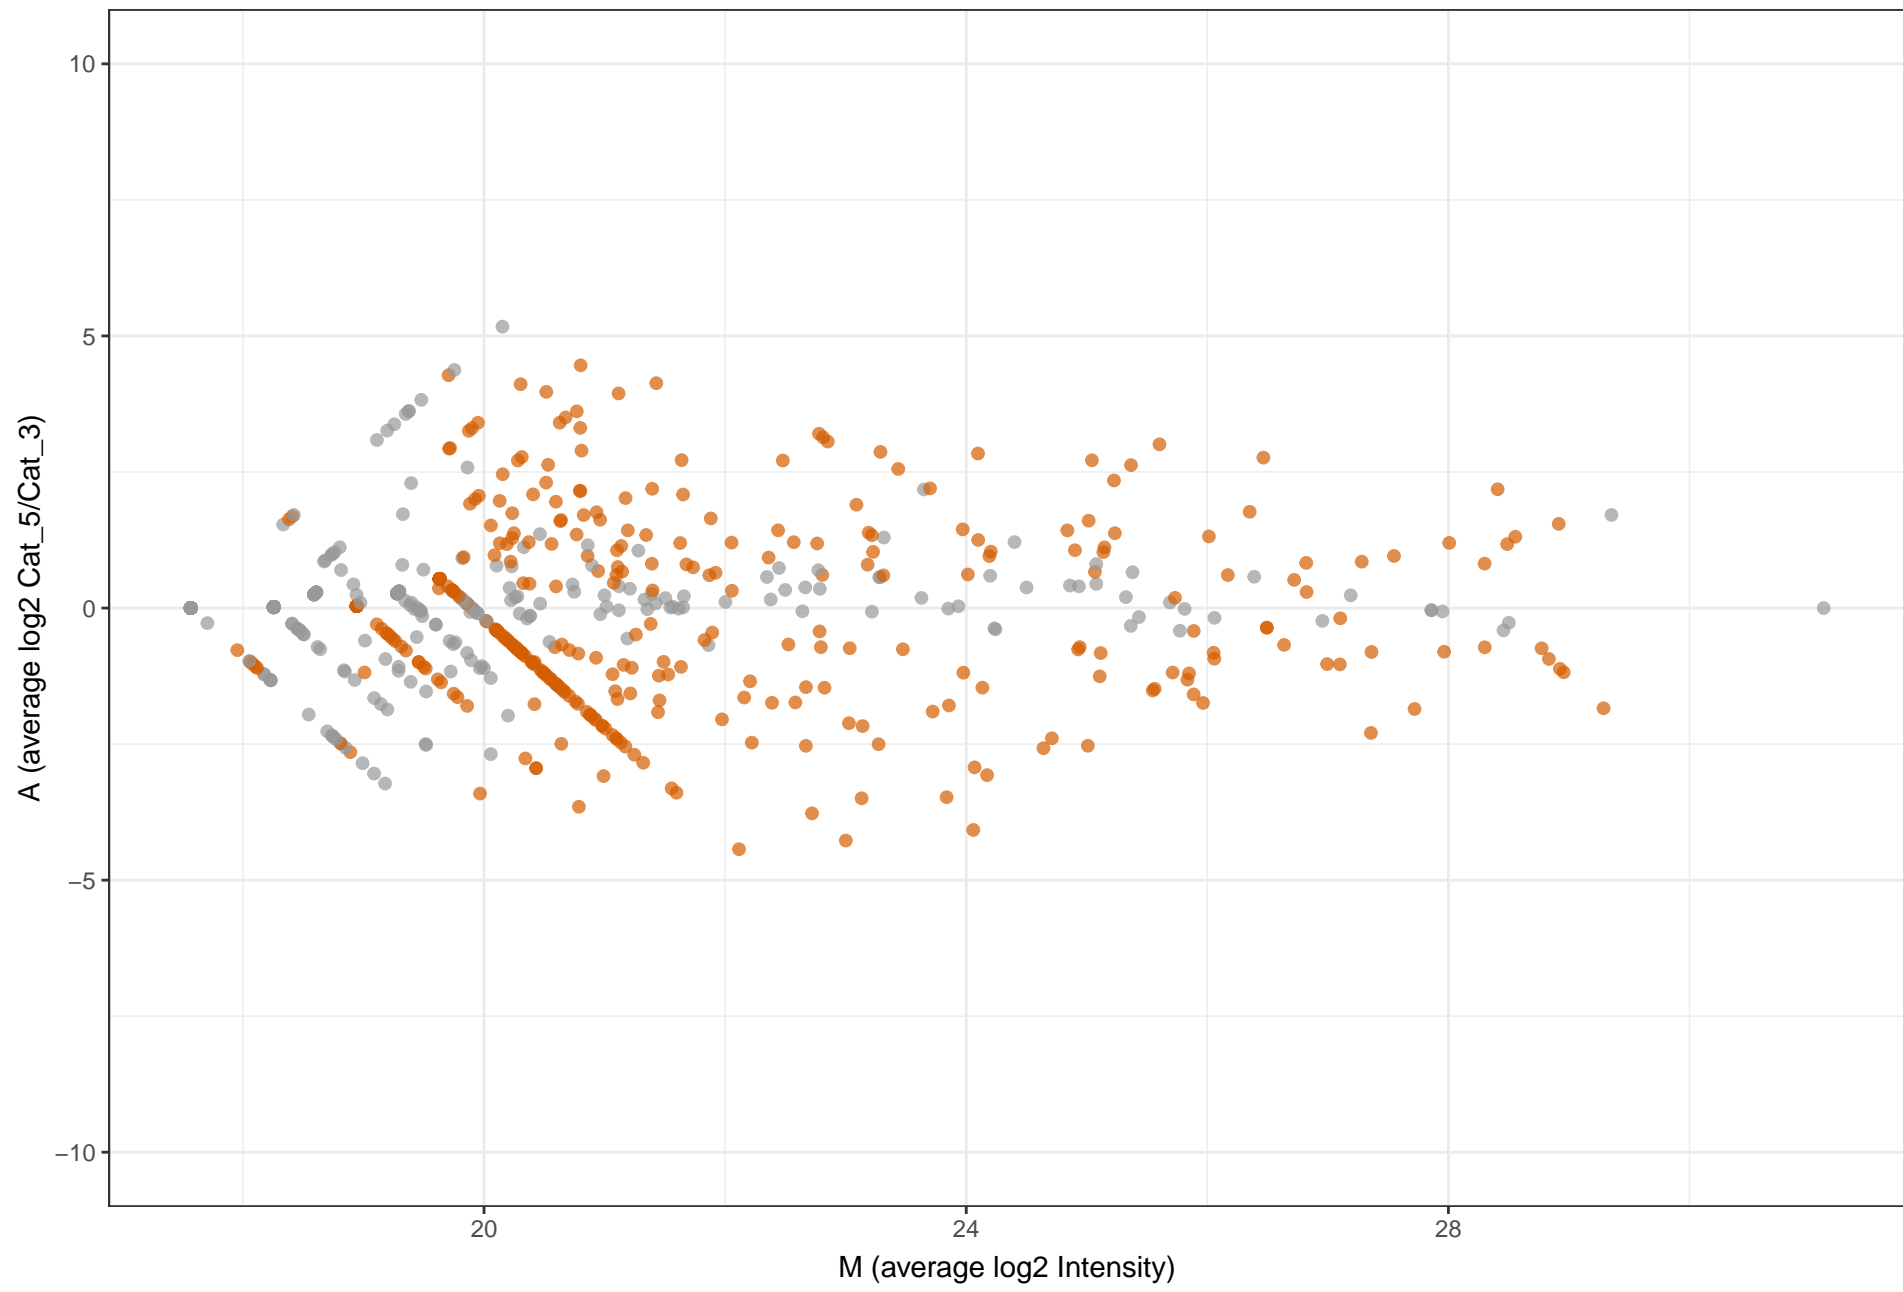

Supplement: supp [file elife-75798-supp-v1.zip]

MA plot

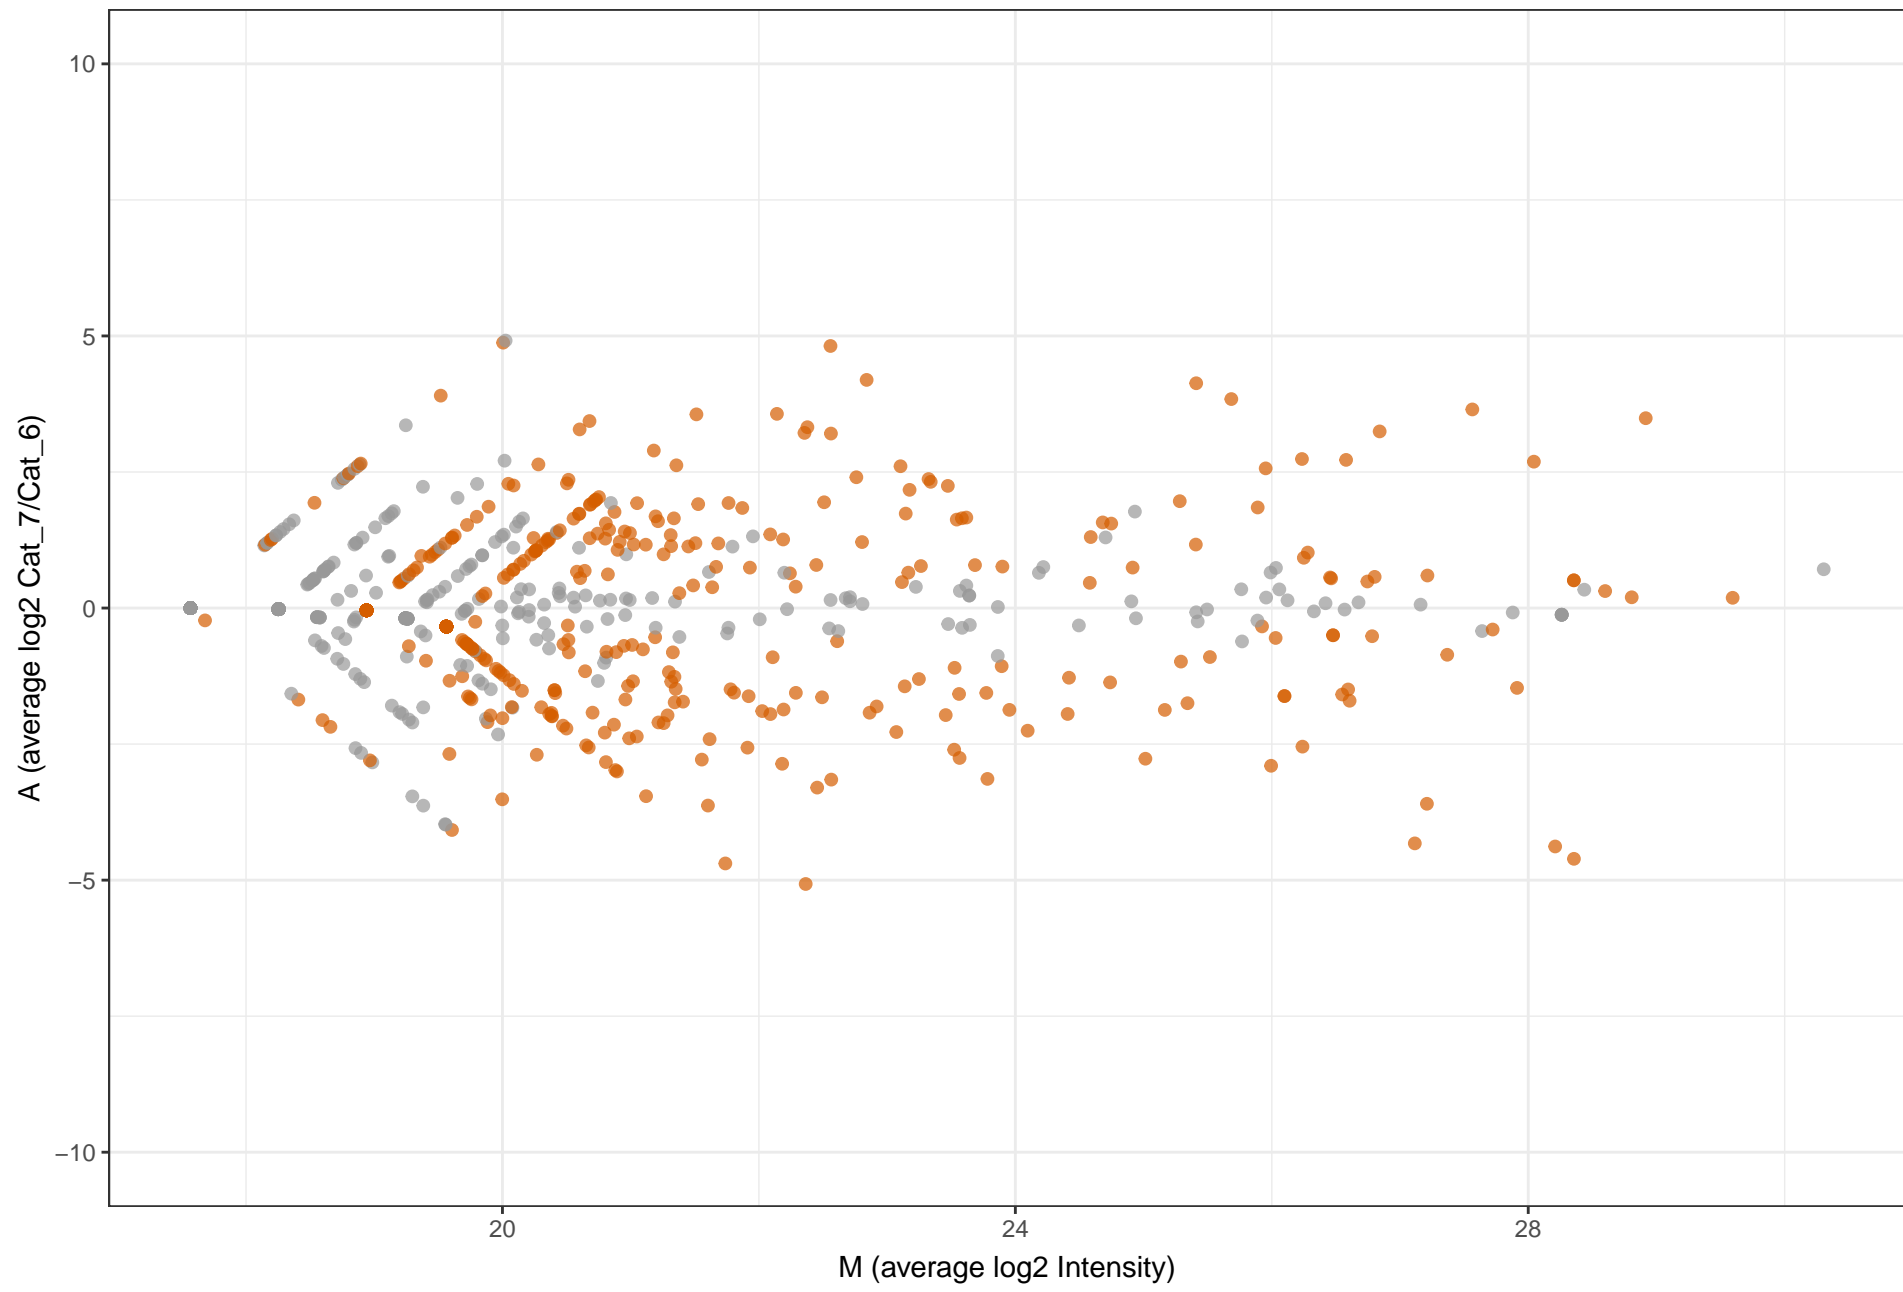

Supplement: supp [file elife-75798-supp-v1.zip]

**P-value vs Fold change**

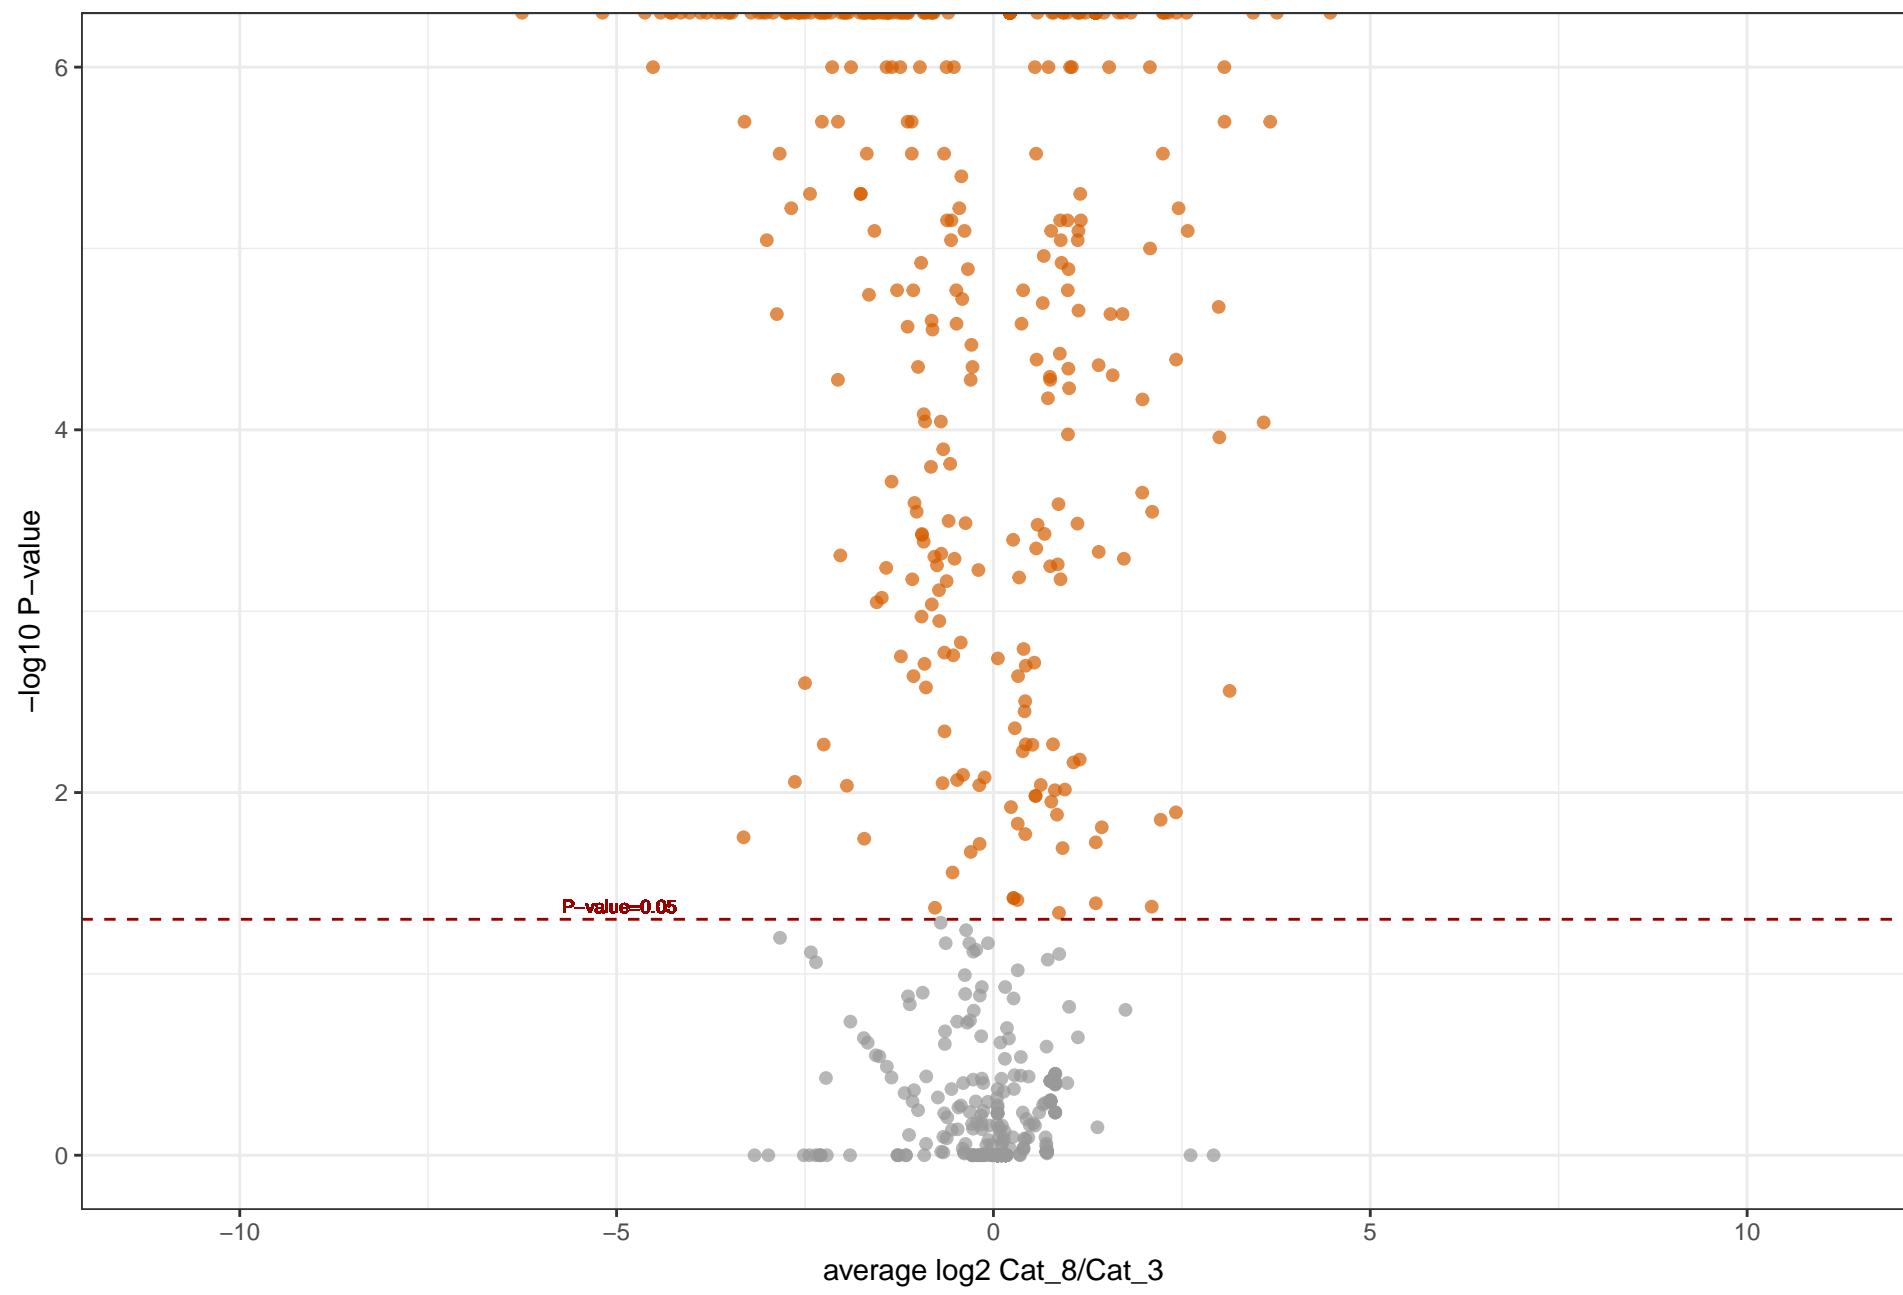

Supplement: supp [file elife-75798-supp-v1.zip]

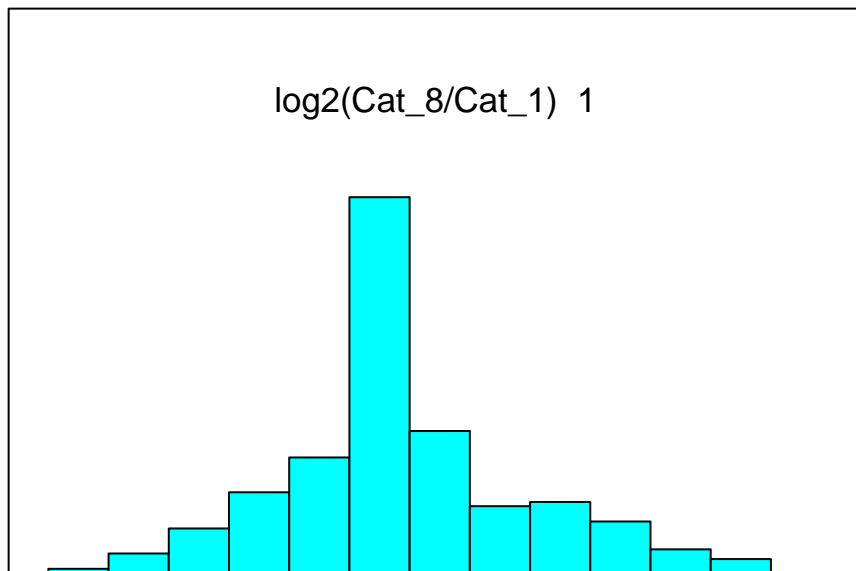

-5 0 5

6  
4  
2  
0  
-2  
-4  
-6

0.81

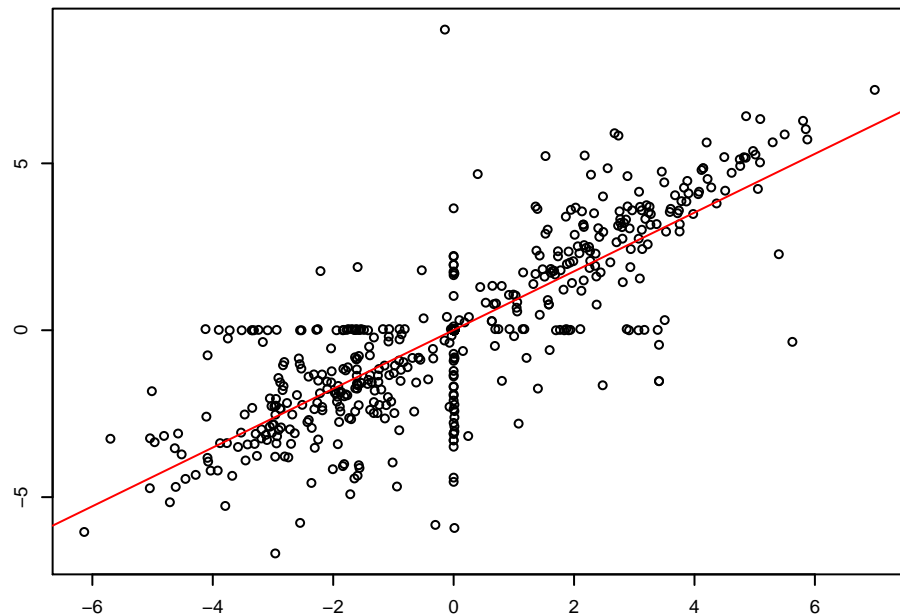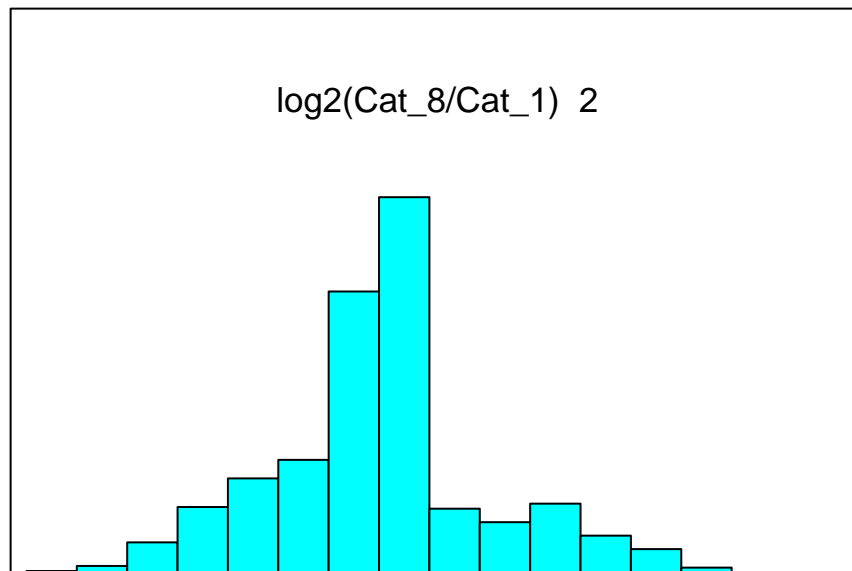

Supplement: supp [file elife-75798-supp-v1.zip]

Value-ordered fold change

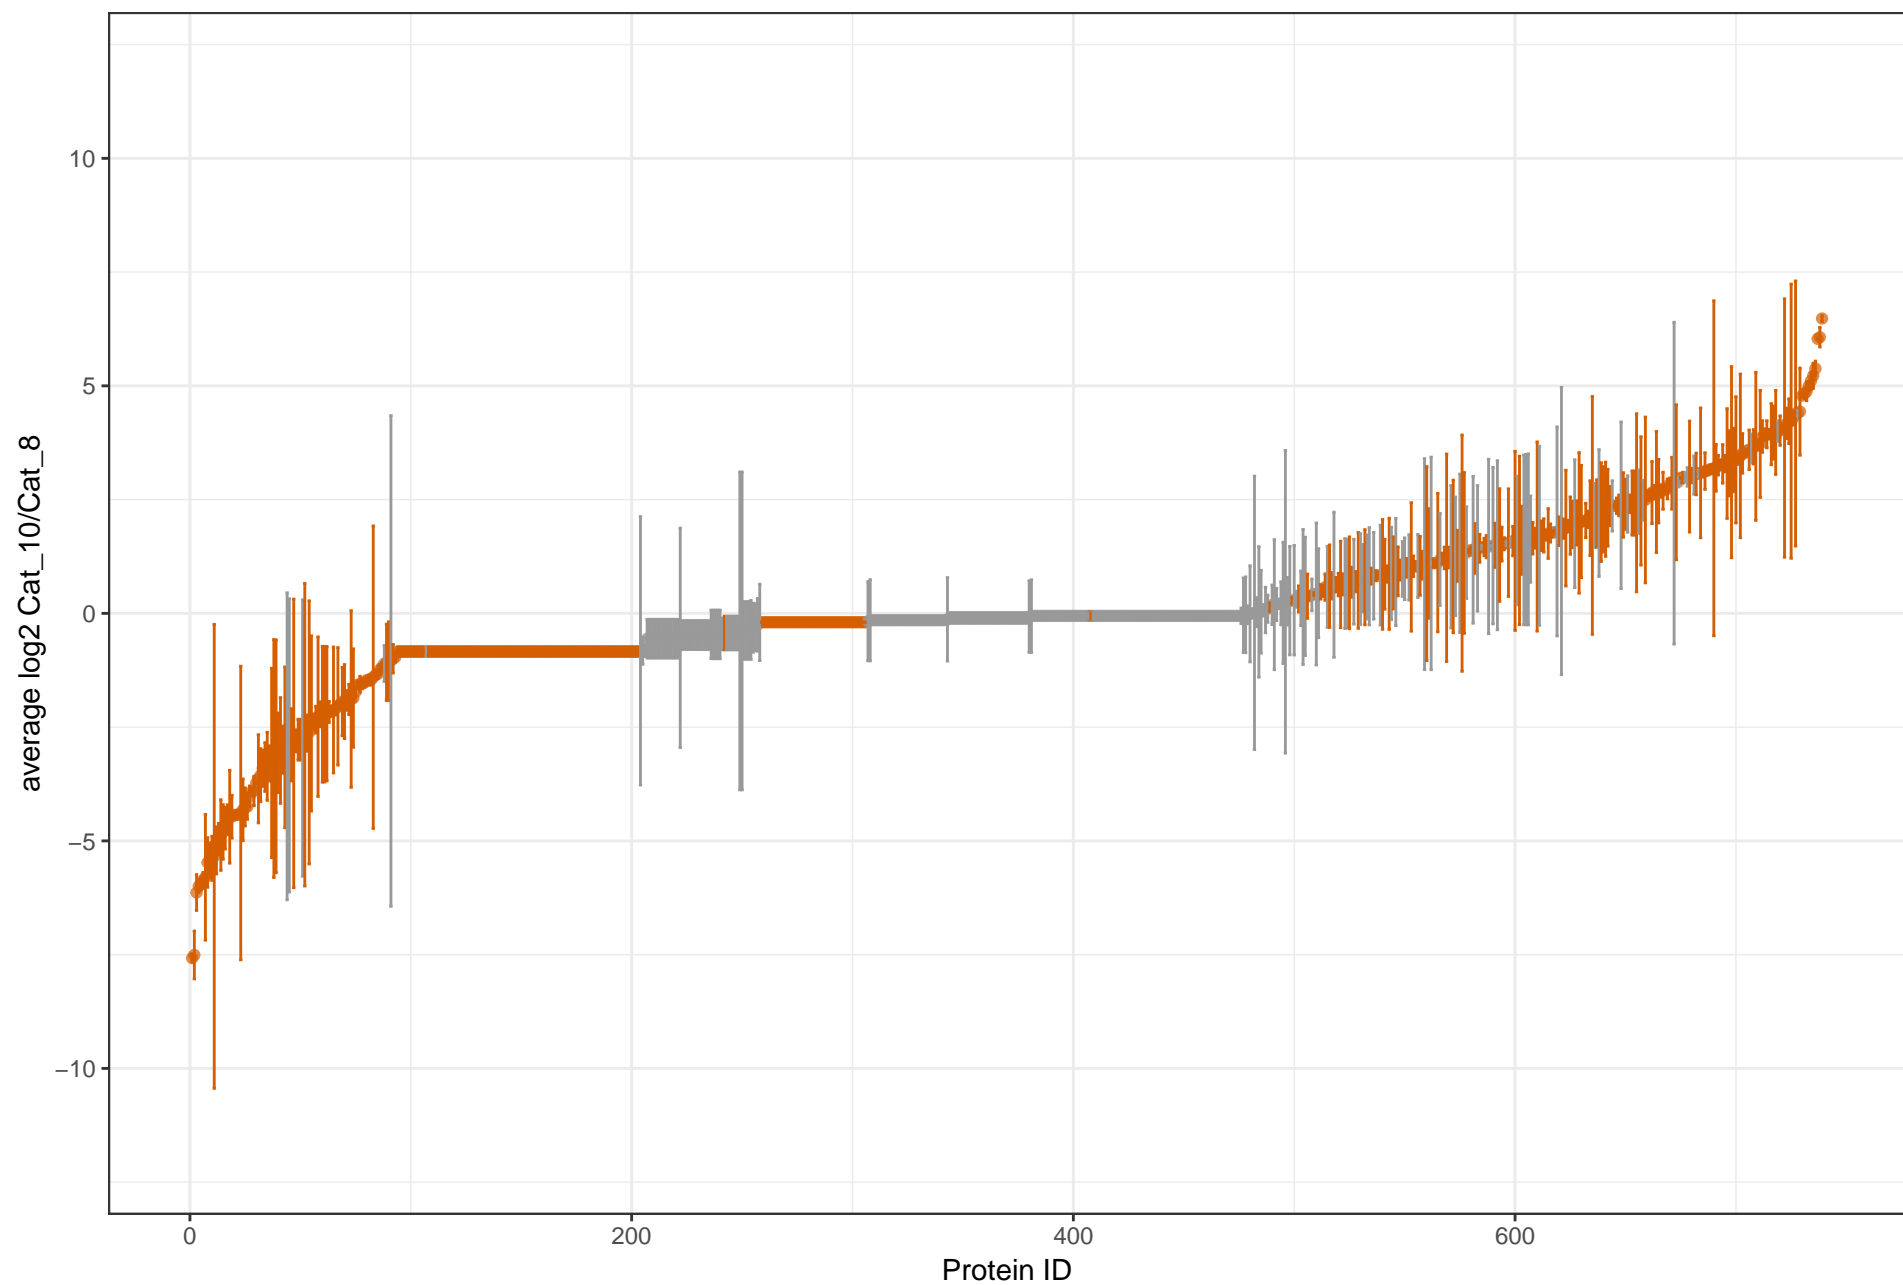

Supplement: supp [file elife-75798-supp-v1.zip]

**P-value vs Fold change**

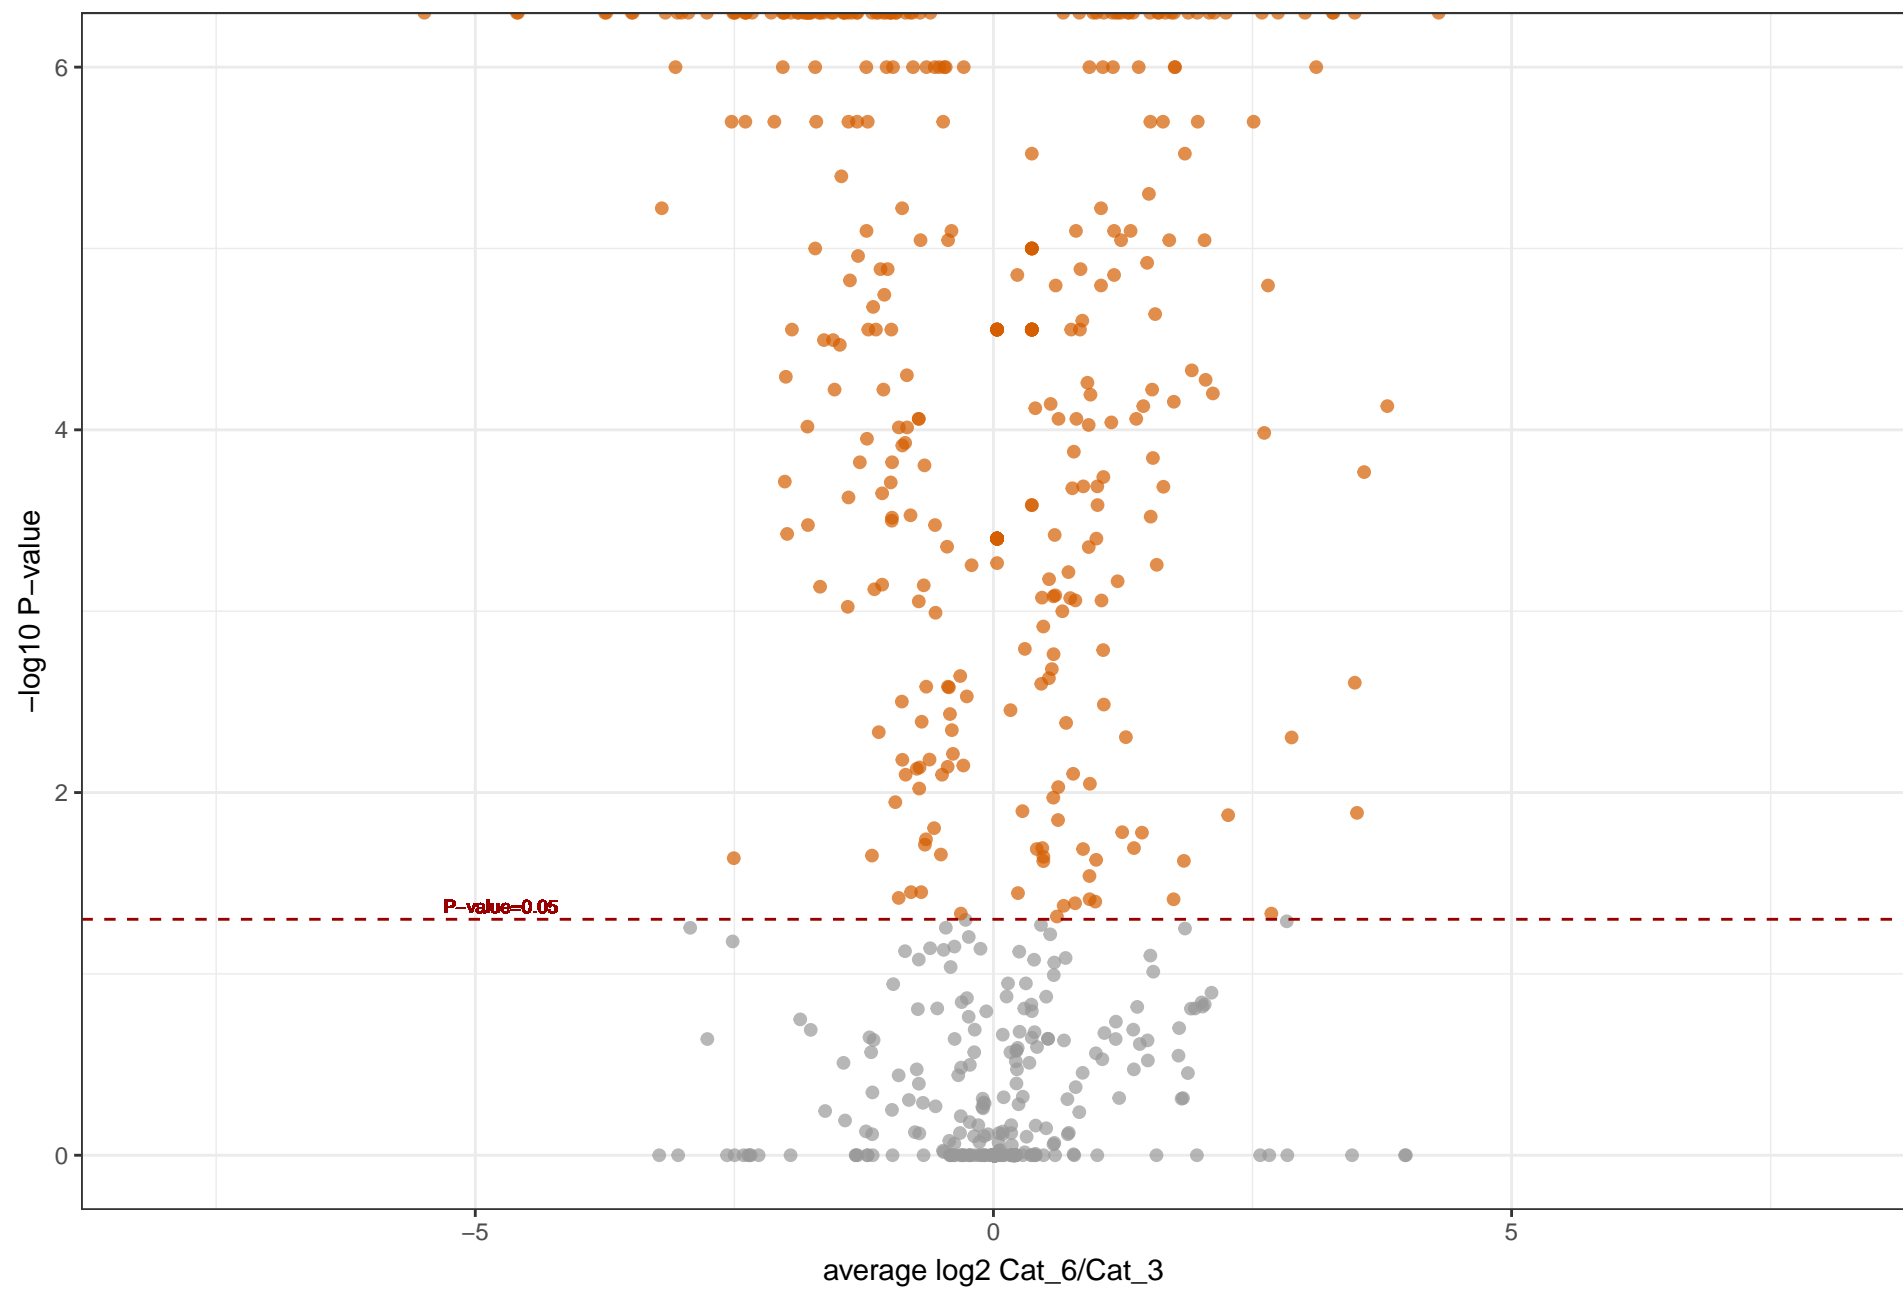

Supplement: supp [file elife-75798-supp-v1.zip]

**P-value vs Fold change**

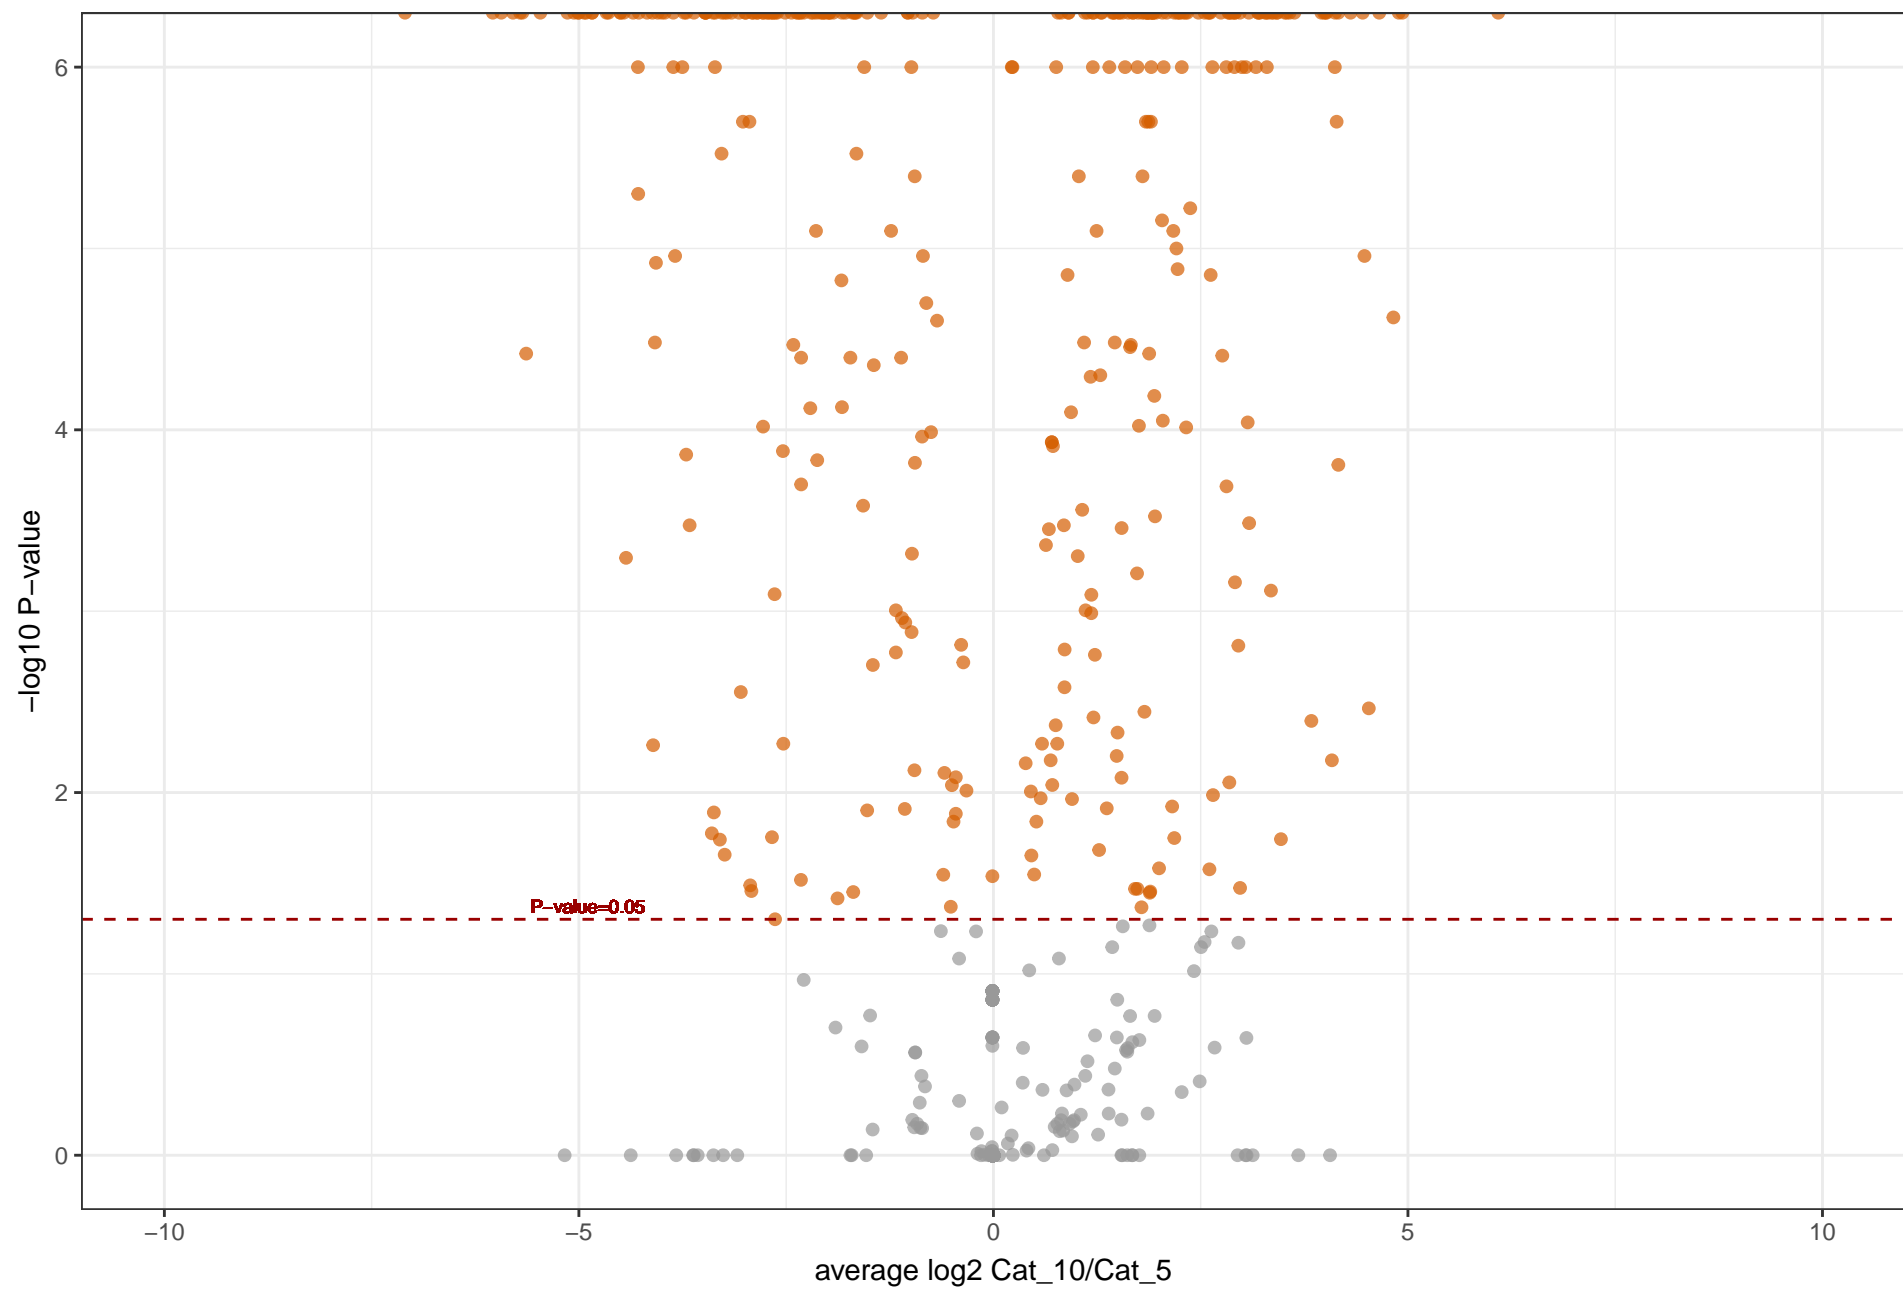

Supplement: supp [file elife-75798-supp-v1.zip]

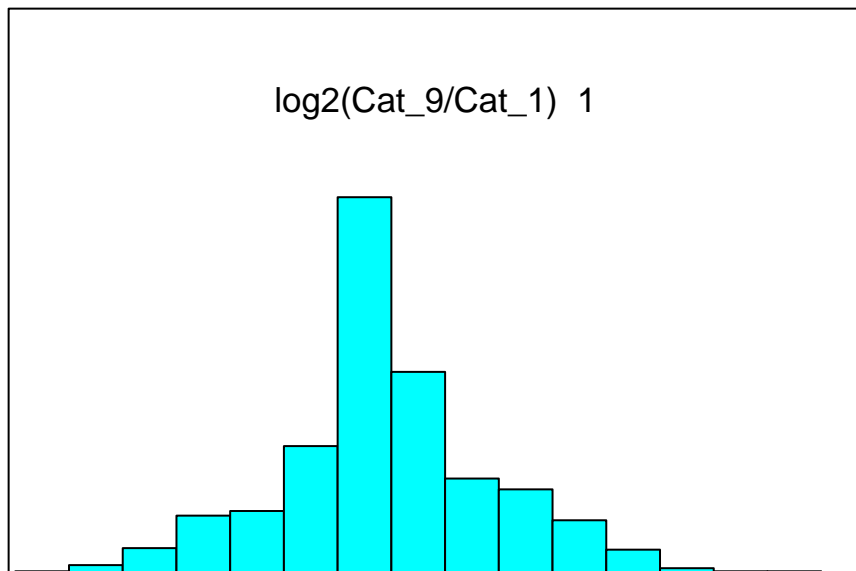

-5 0 5

5  
0  
-5

0.78

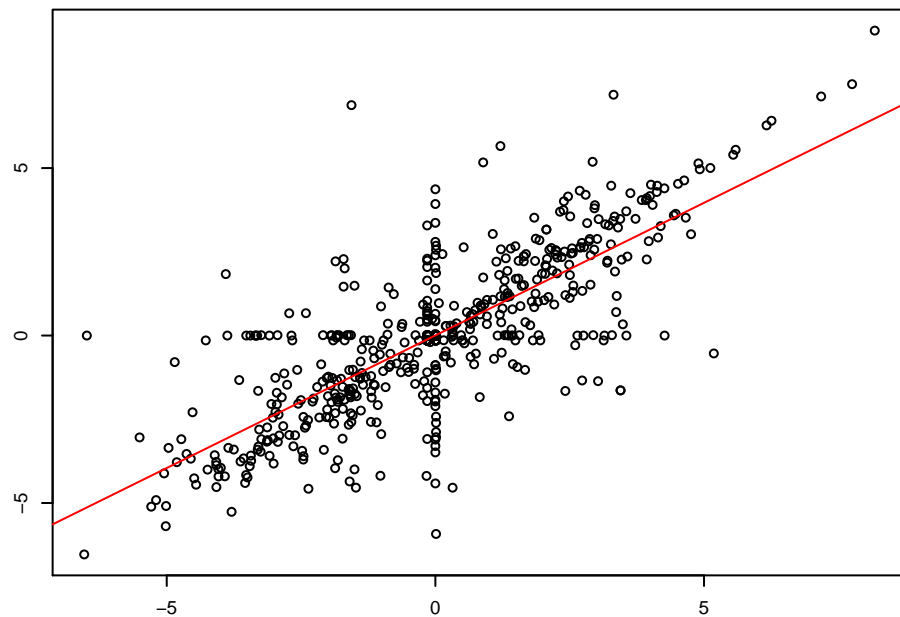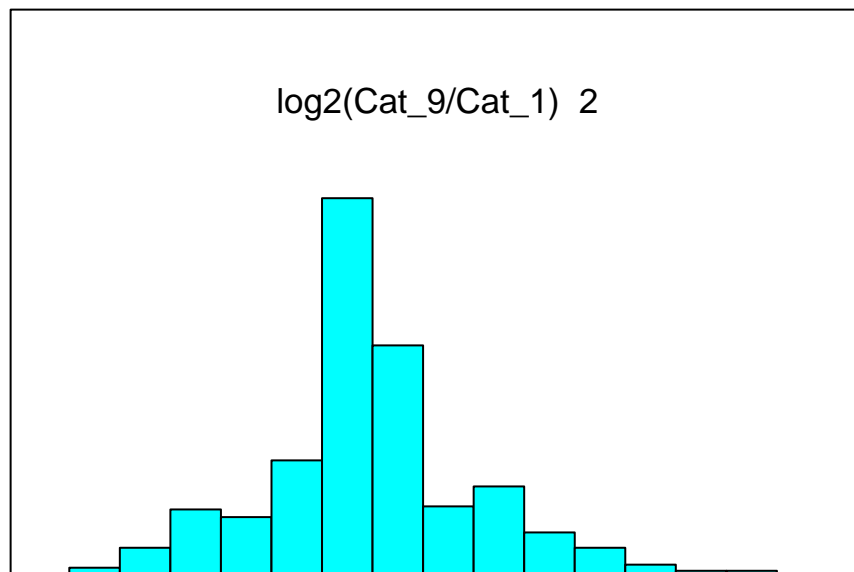

Supplement: supp [file elife-75798-supp-v1.zip]

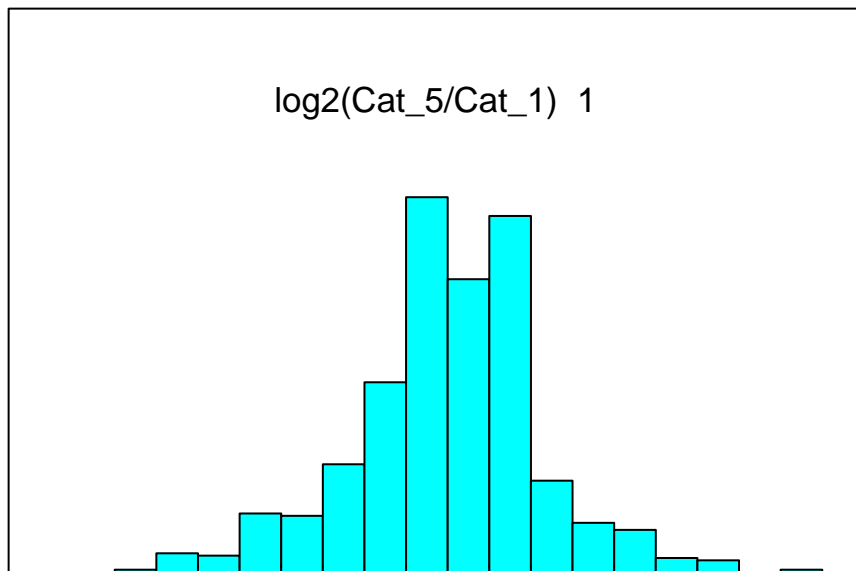

-10 -5 0 5

0.88

5 0 -5 -10

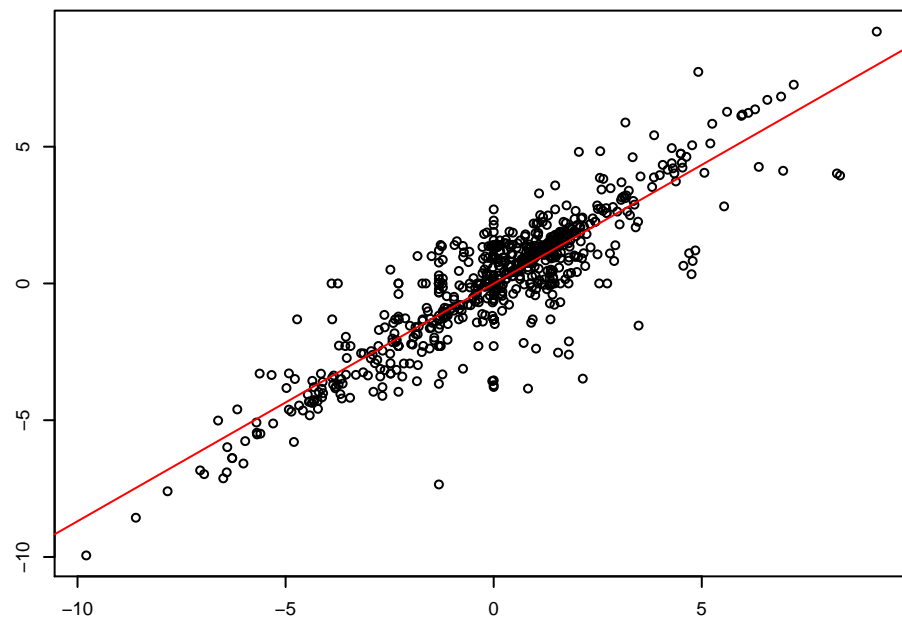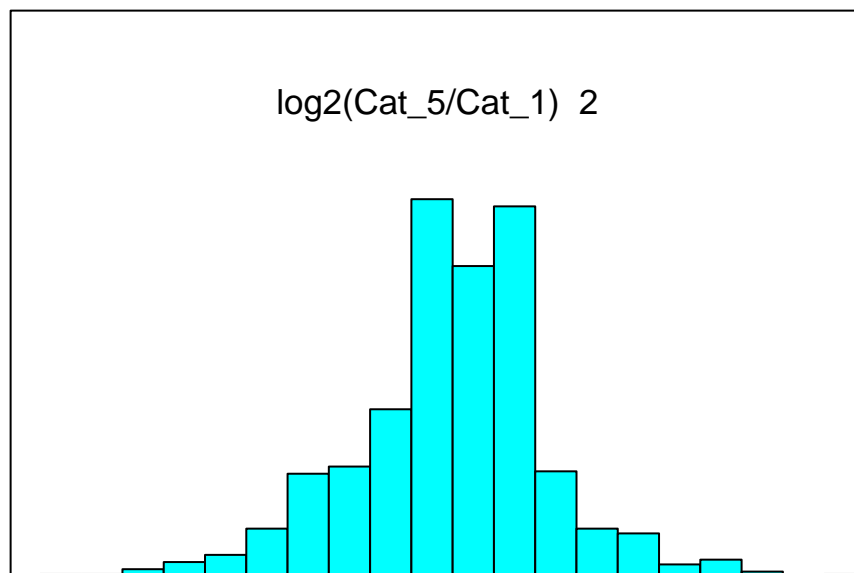

Supplement: supp [file elife-75798-supp-v1.zip]

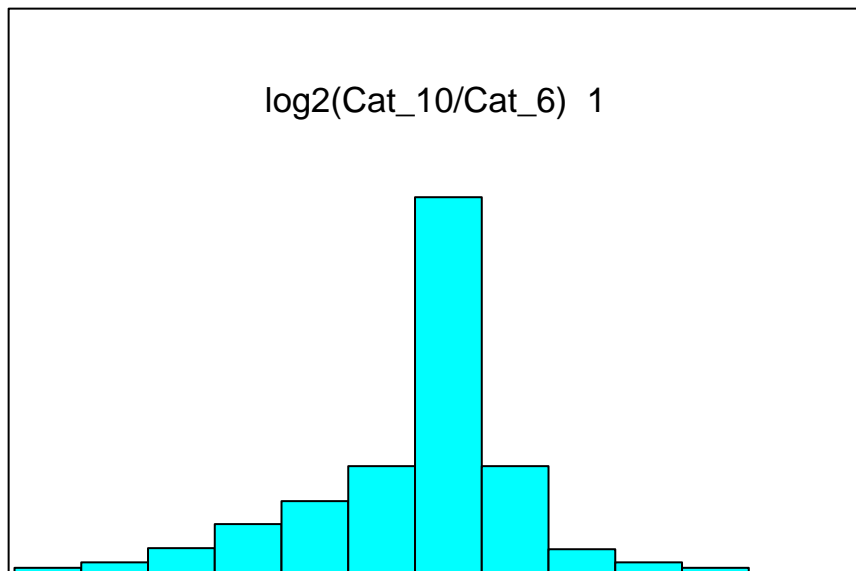

-6 -4 -2 0 2 4 6

6

4

2

0

-2

-4

-6

0.72

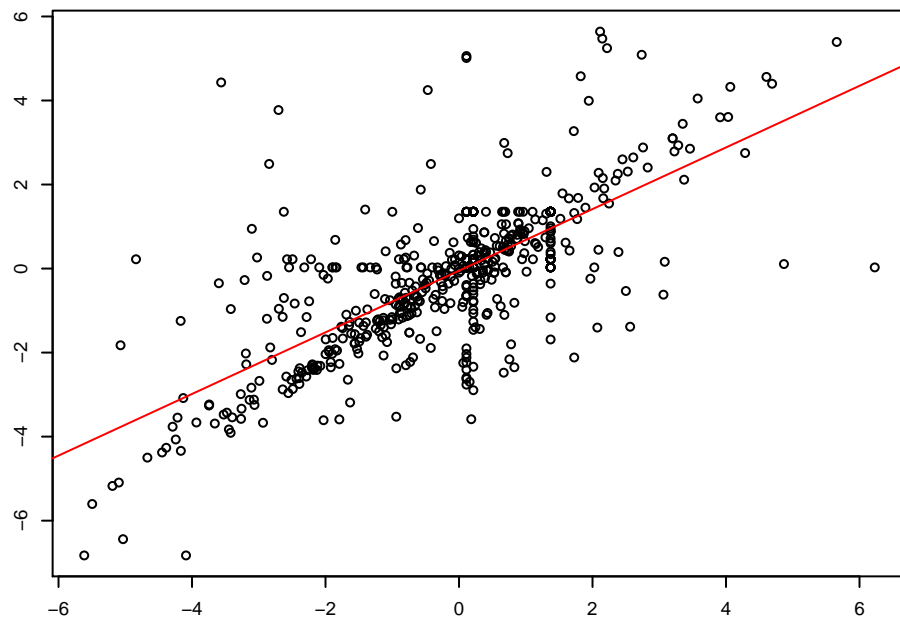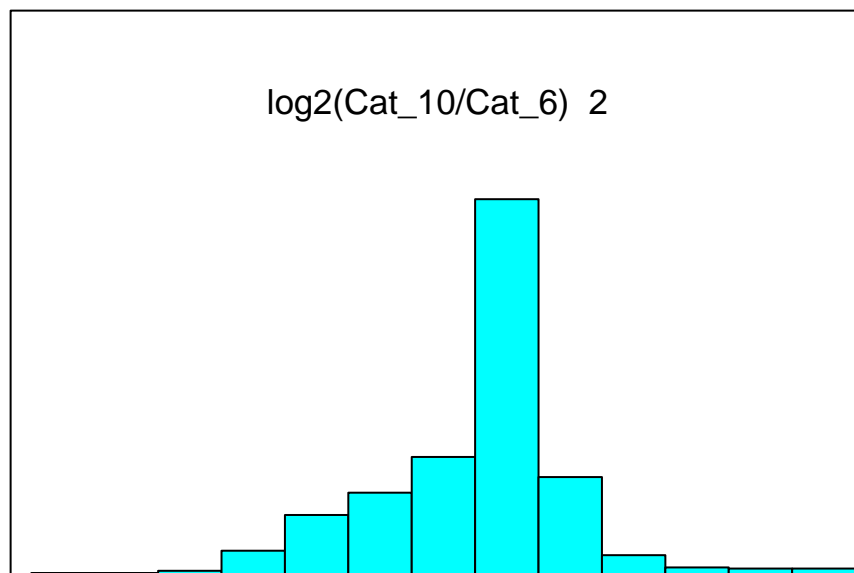

Supplement: supp [file elife-75798-supp-v1.zip]

MA plot

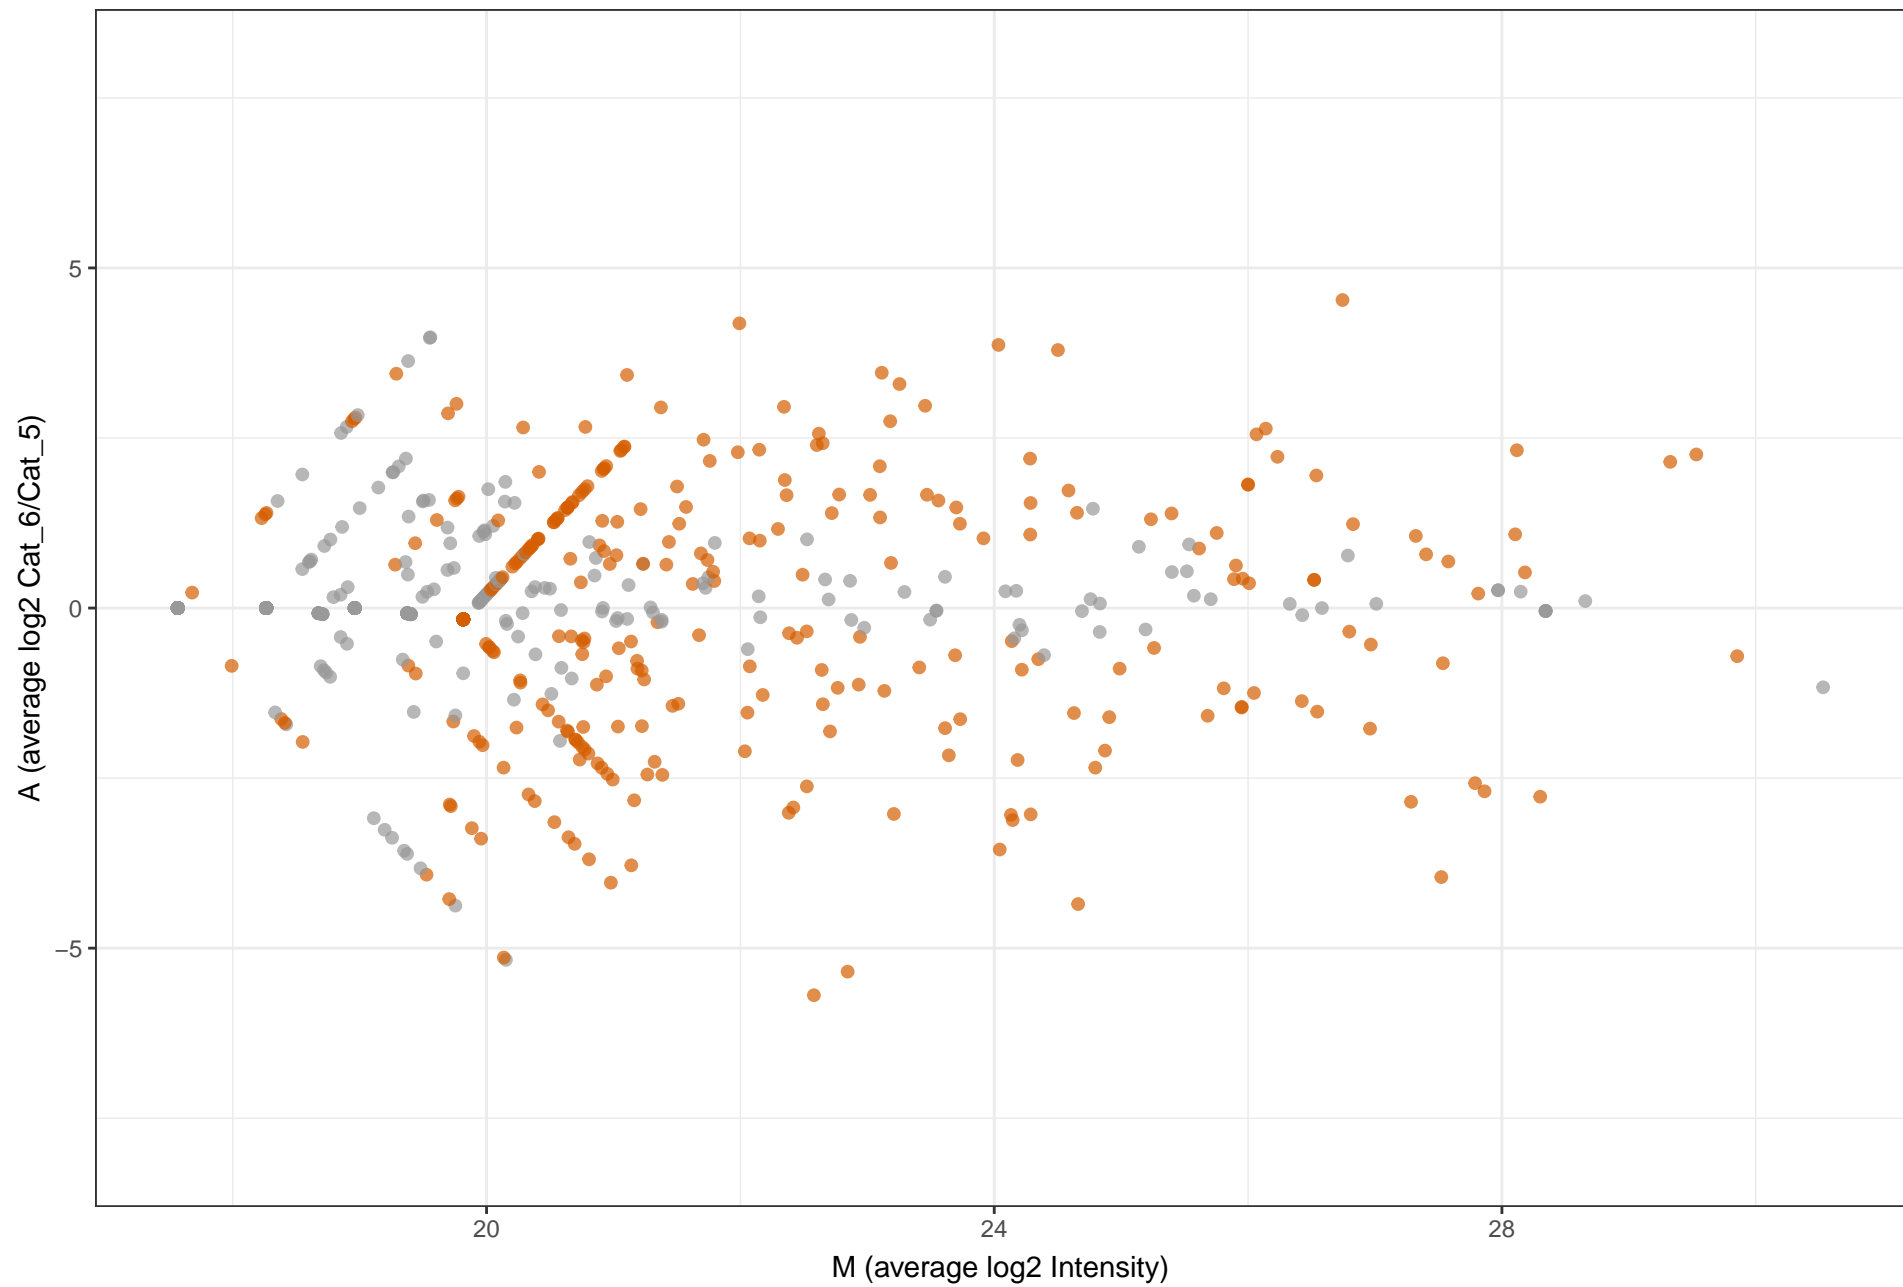

Supplement: supp [file elife-75798-supp-v1.zip]

P-value vs Fold change

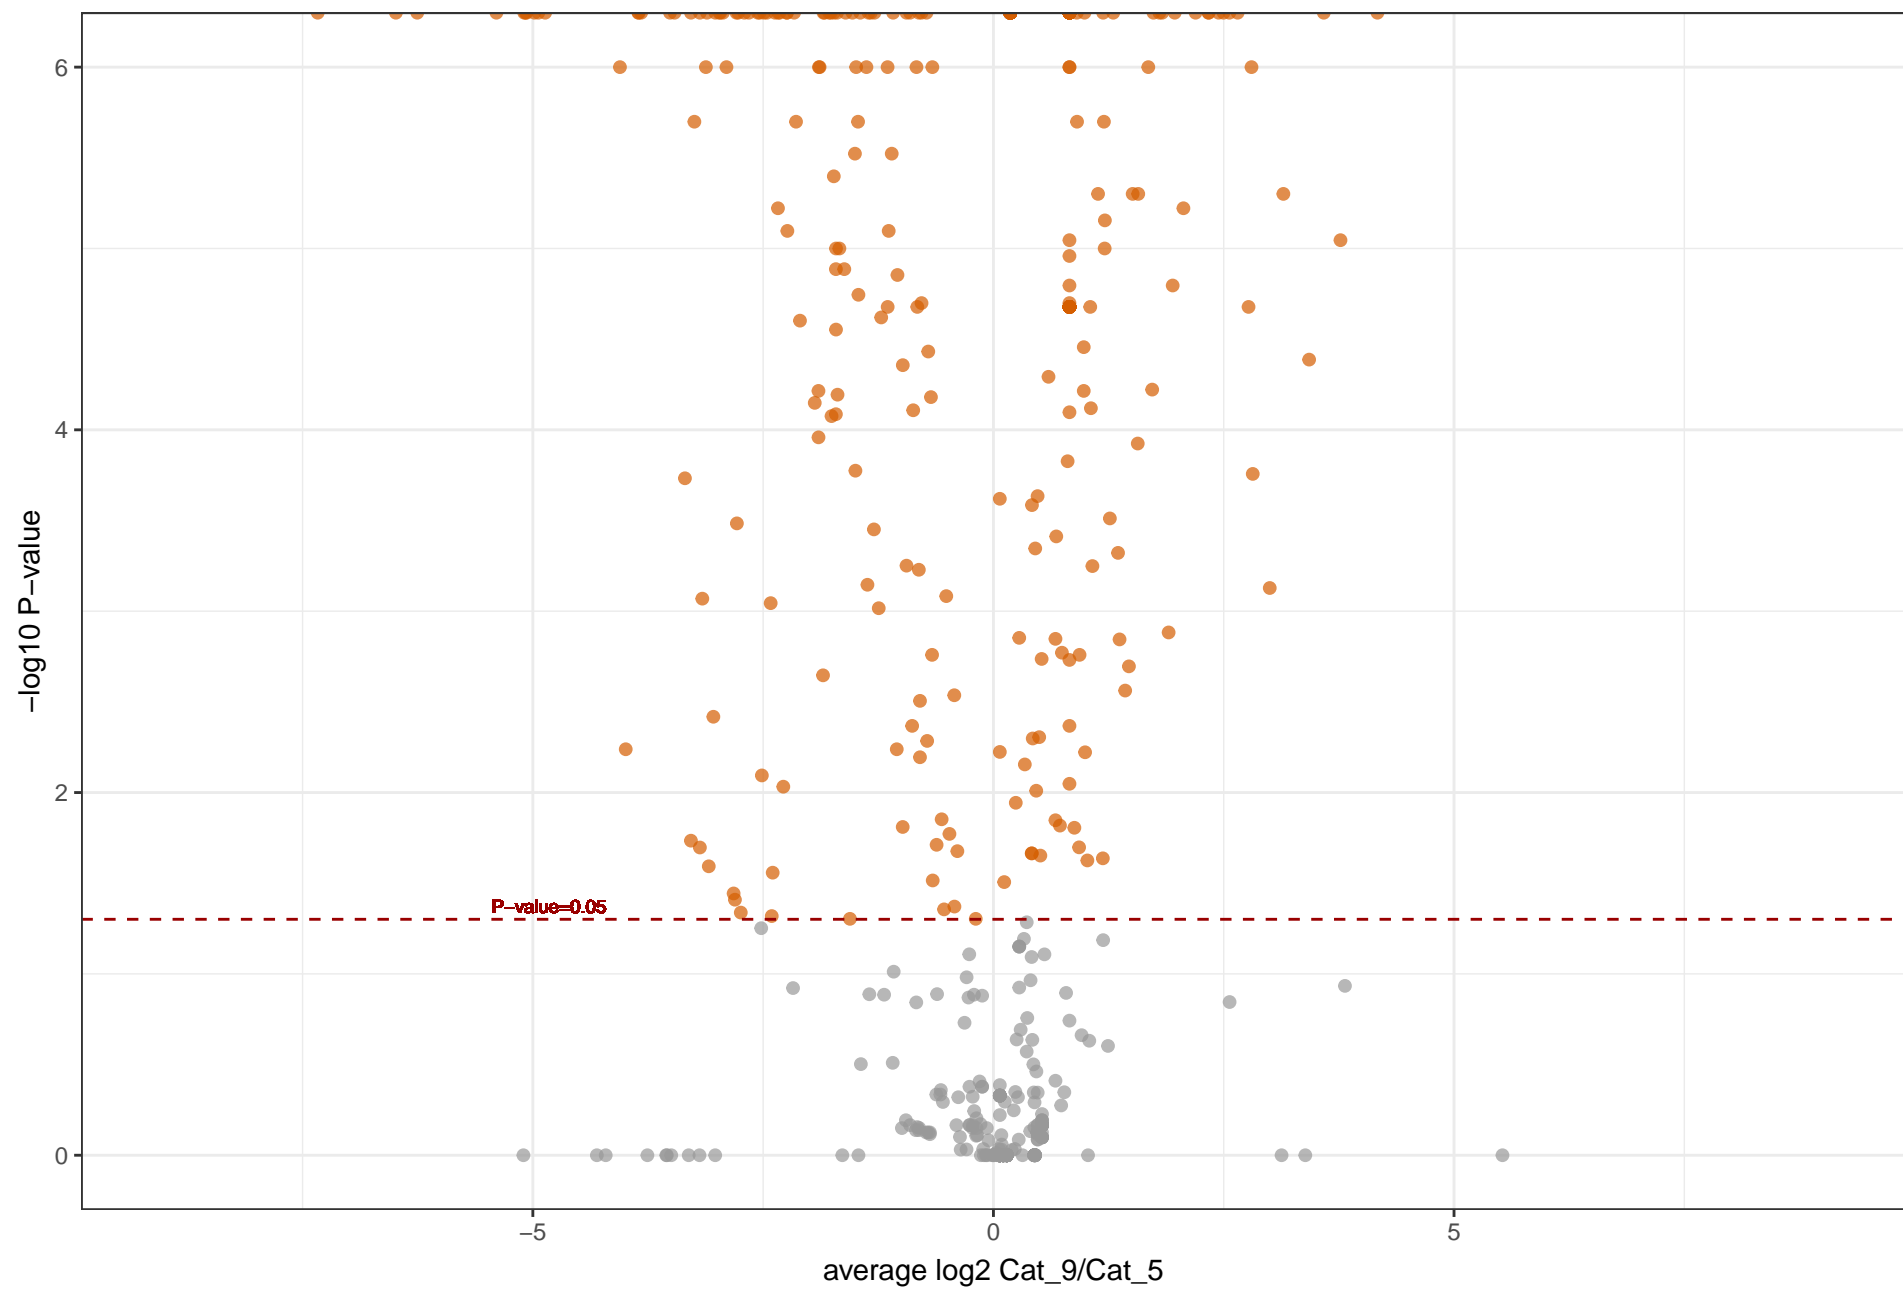

Supplement: supp [file elife-75798-supp-v1.zip]

Value-ordered fold change

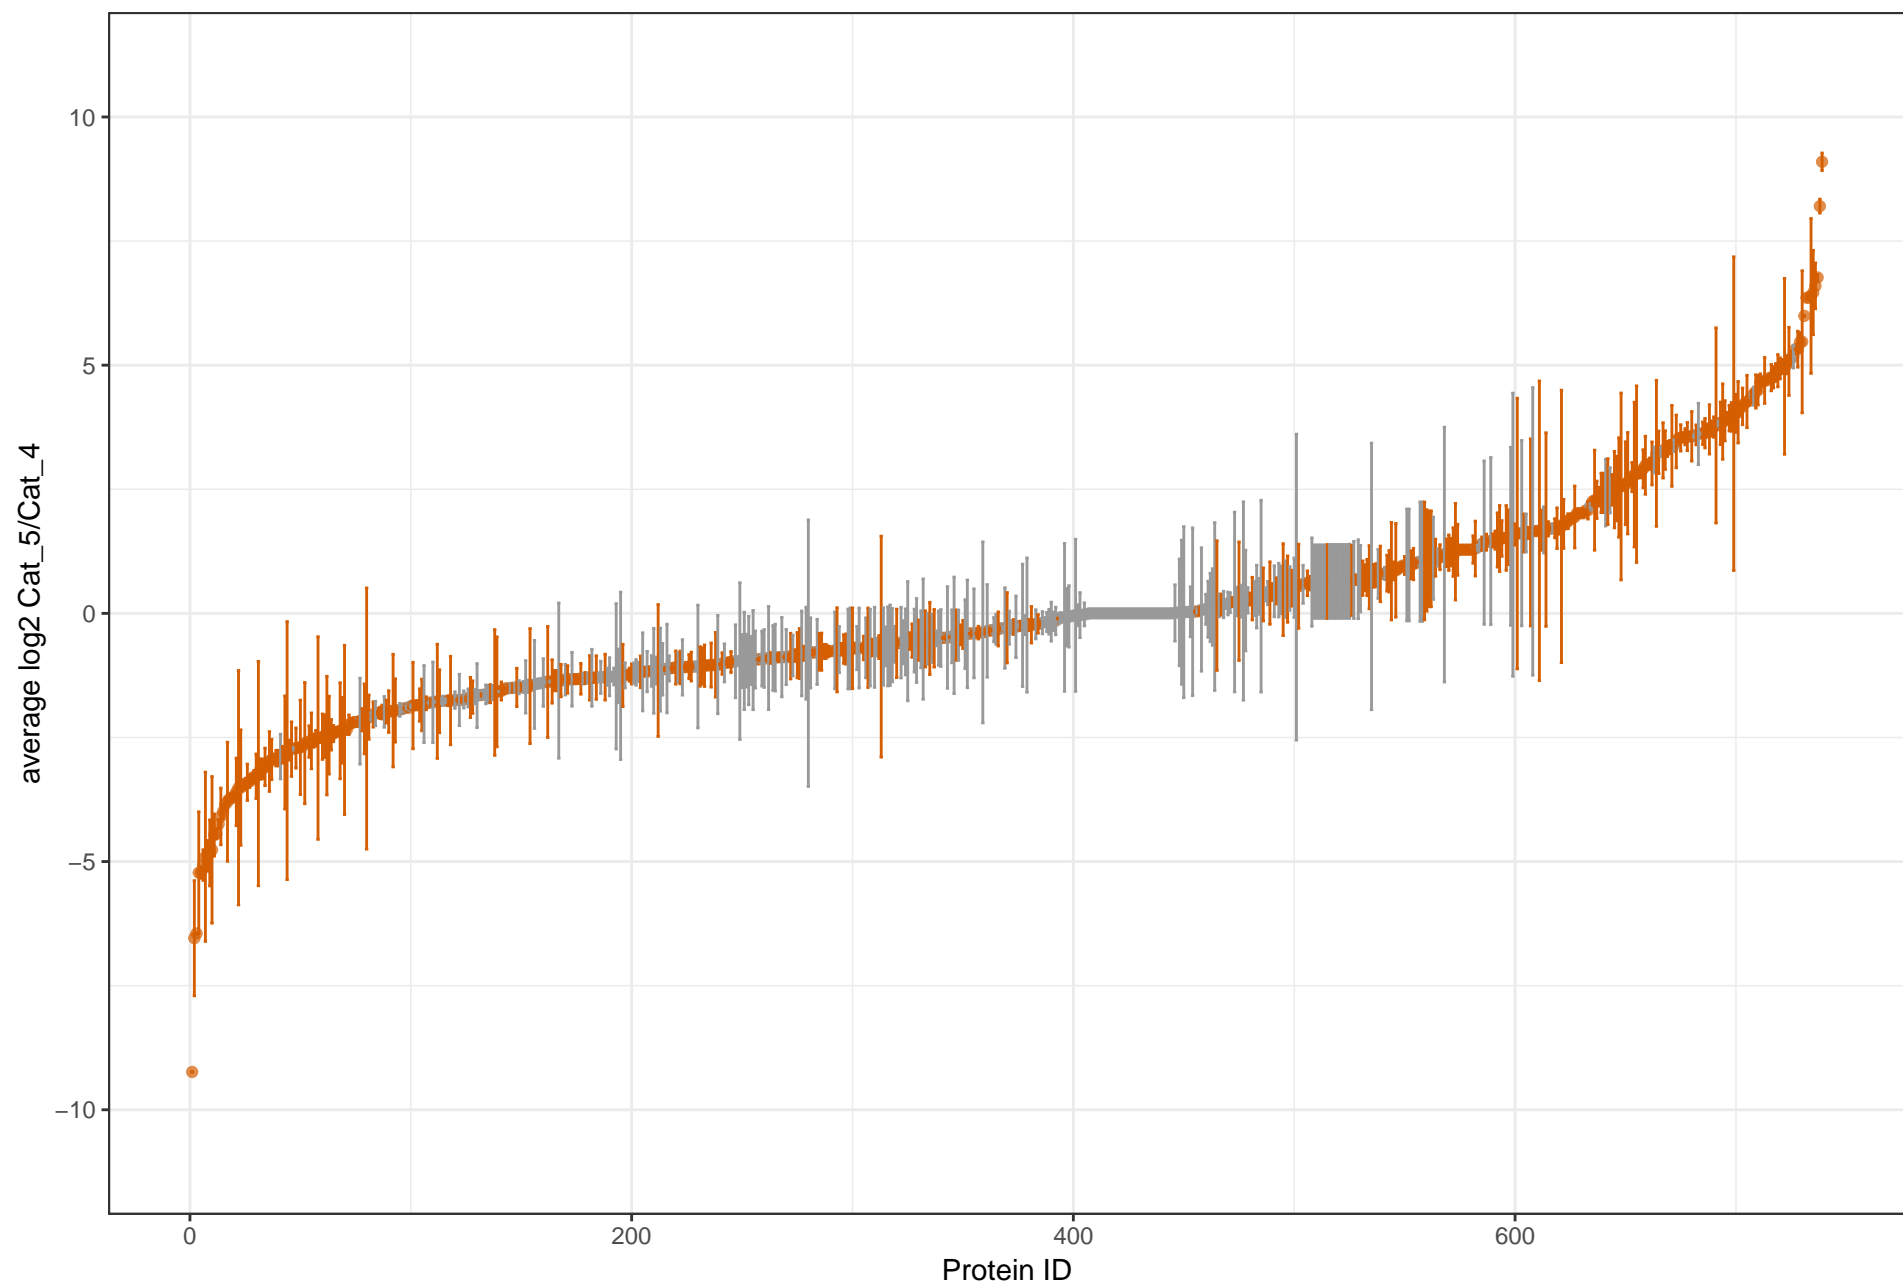

Supplement: supp [file elife-75798-supp-v1.zip]

MA plot

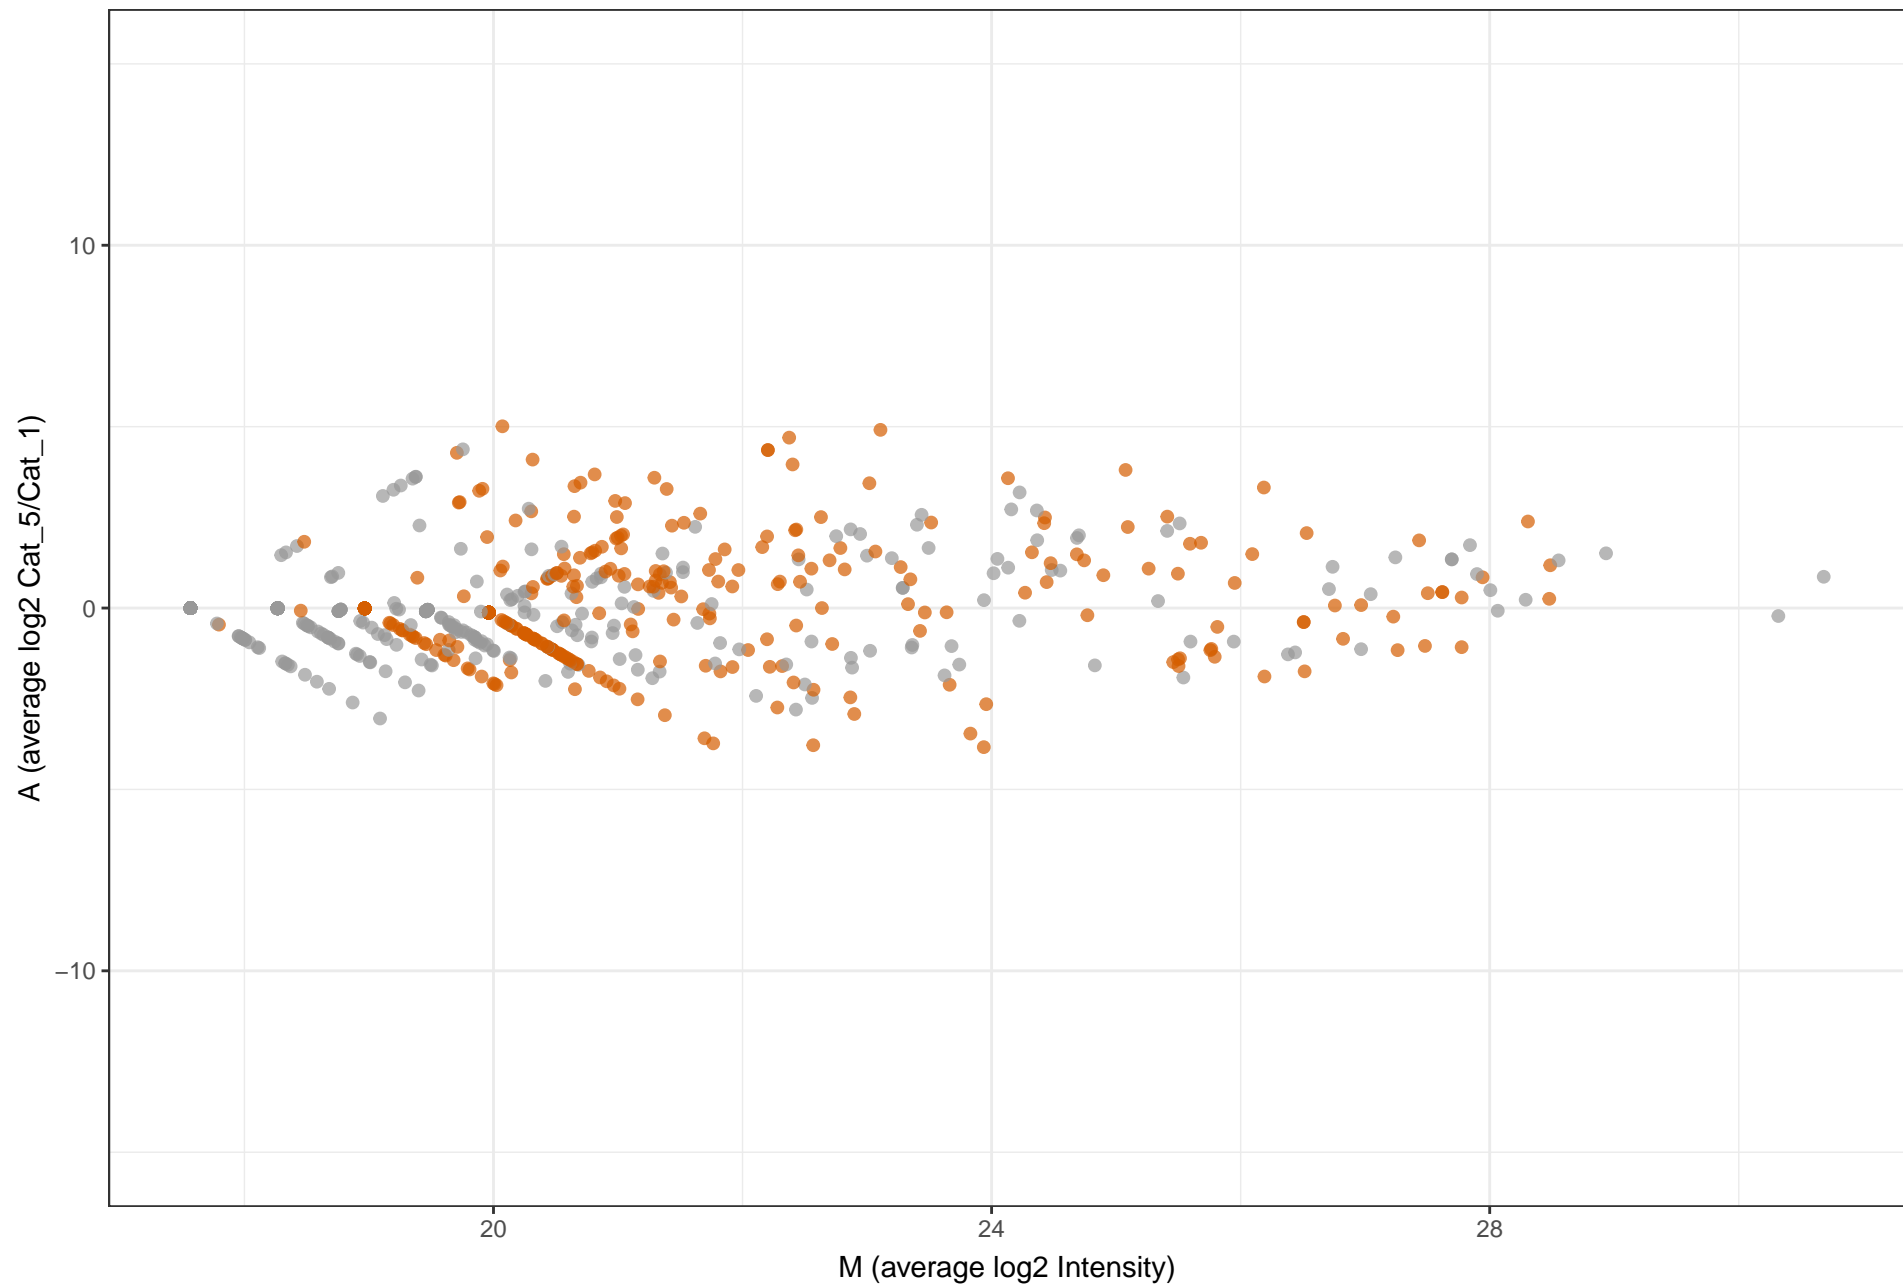

Supplement: supp [file elife-75798-supp-v1.zip]

Value-ordered fold change

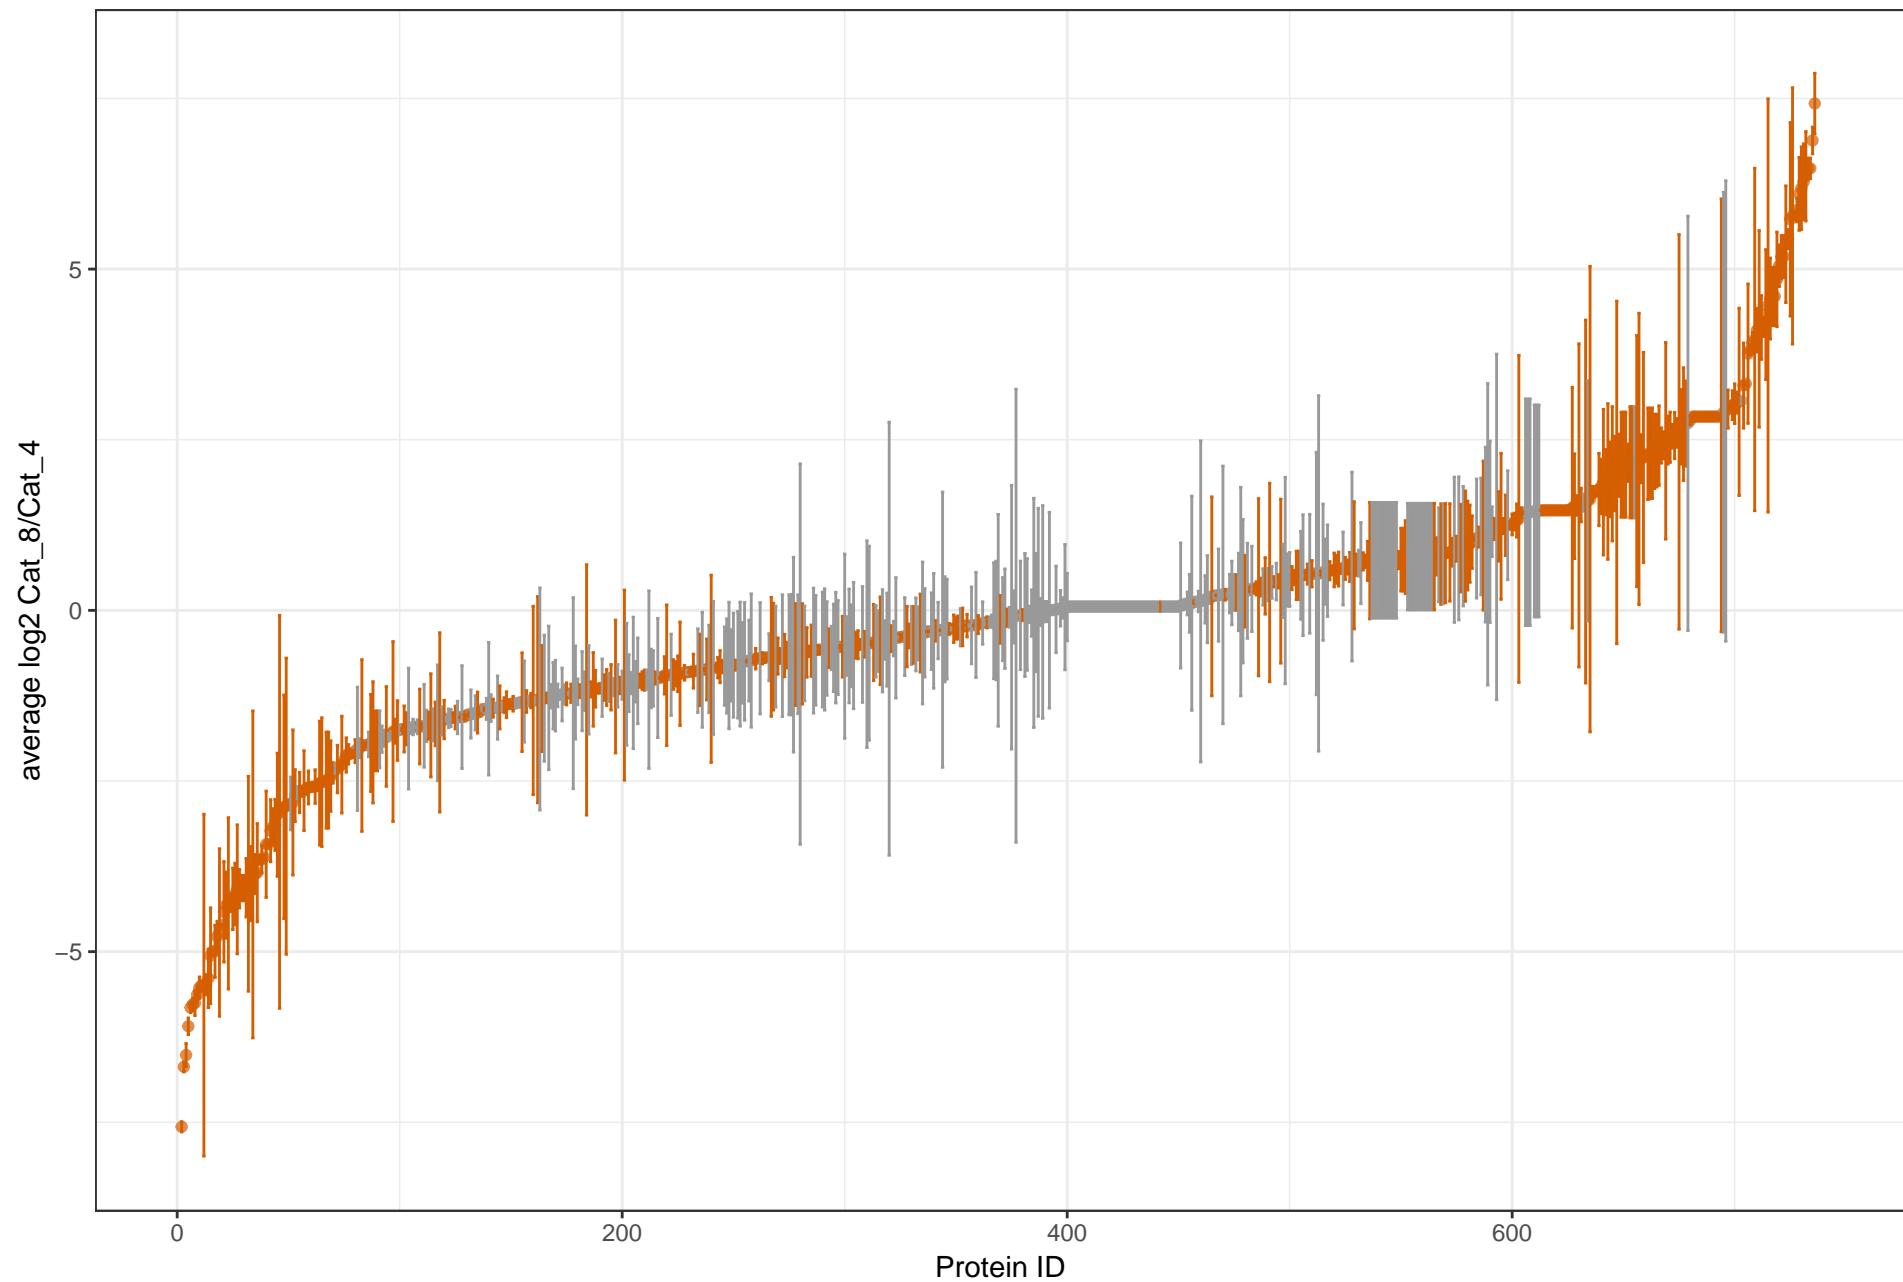

Supplement: supp [file elife-75798-supp-v1.zip]

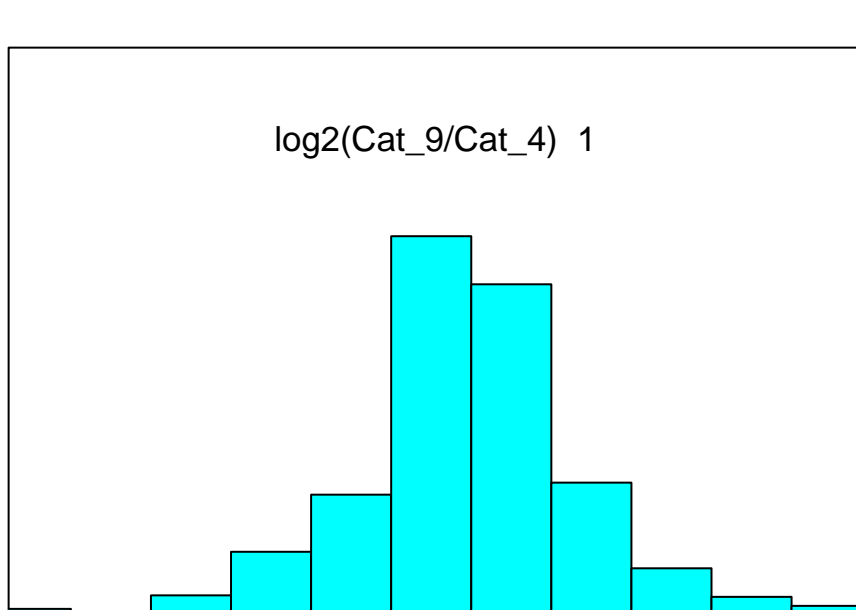

0.70

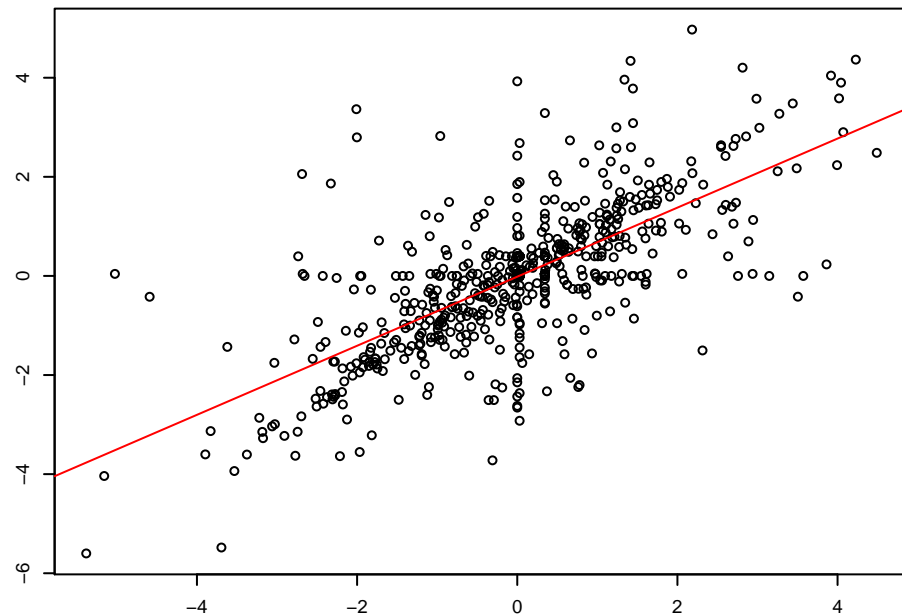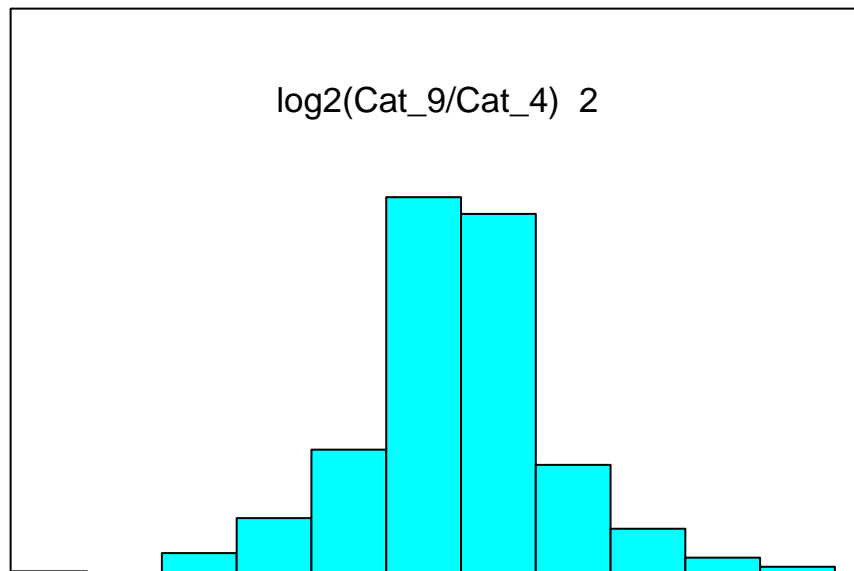

Supplement: supp [file elife-75798-supp-v1.zip]

MA plot

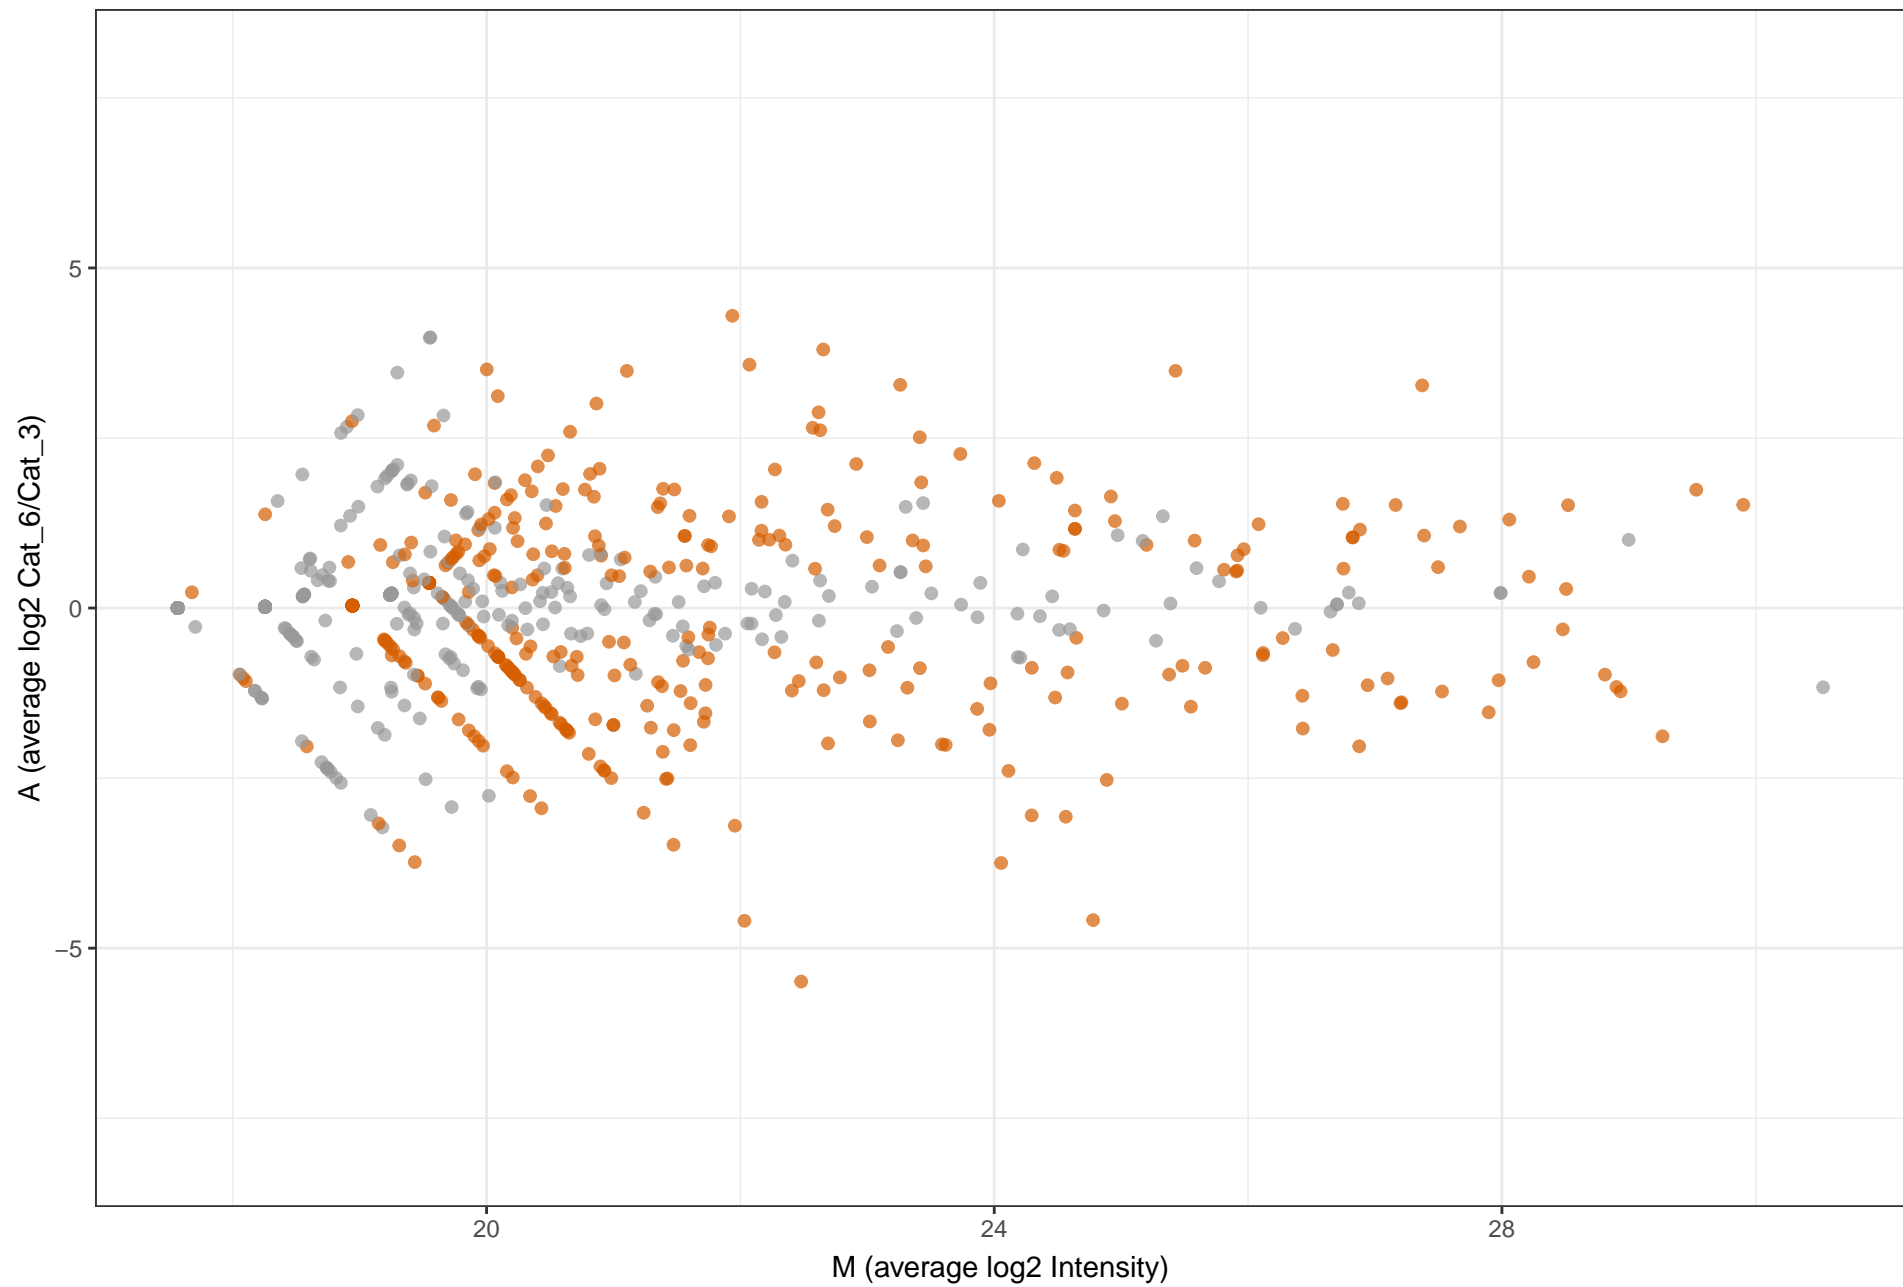

Supplement: supp [file elife-75798-supp-v1.zip]

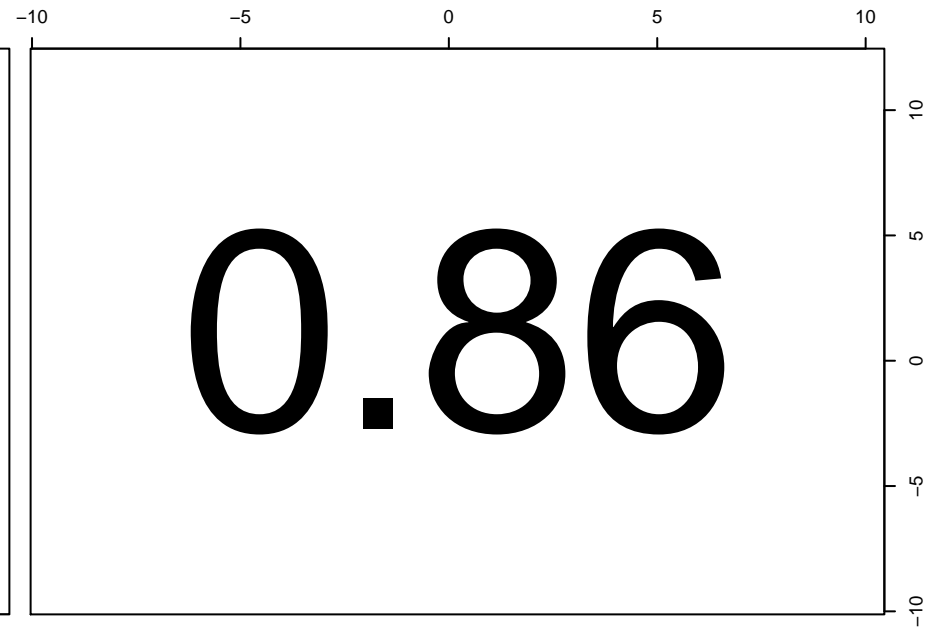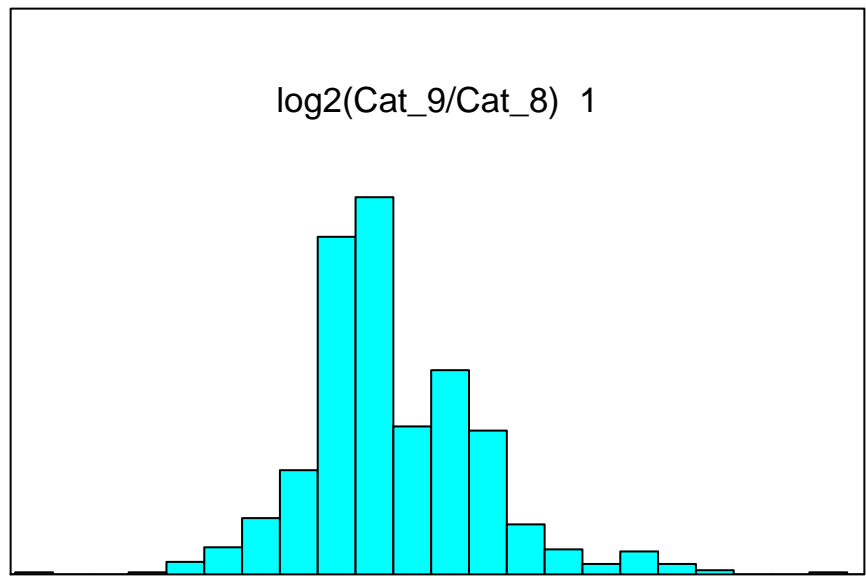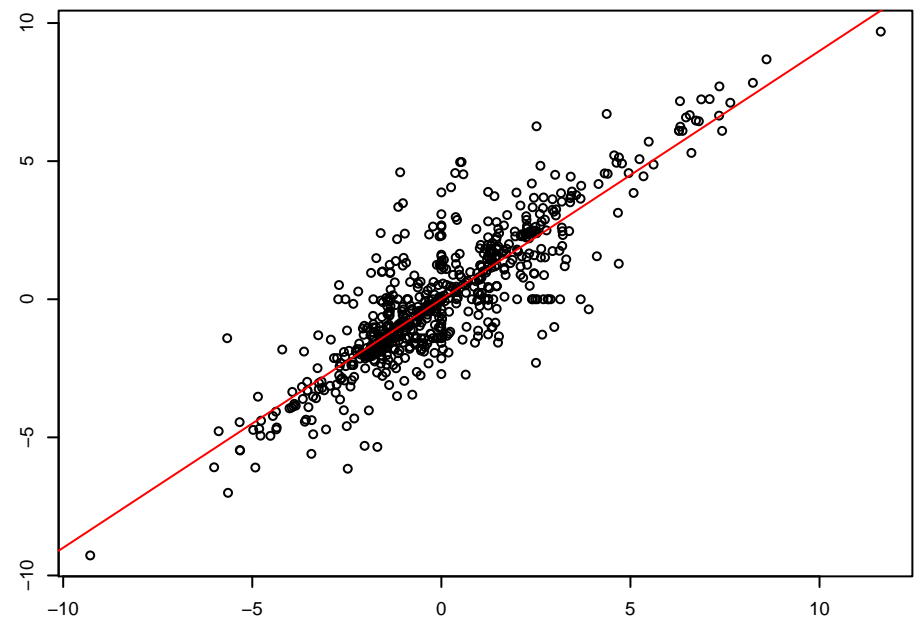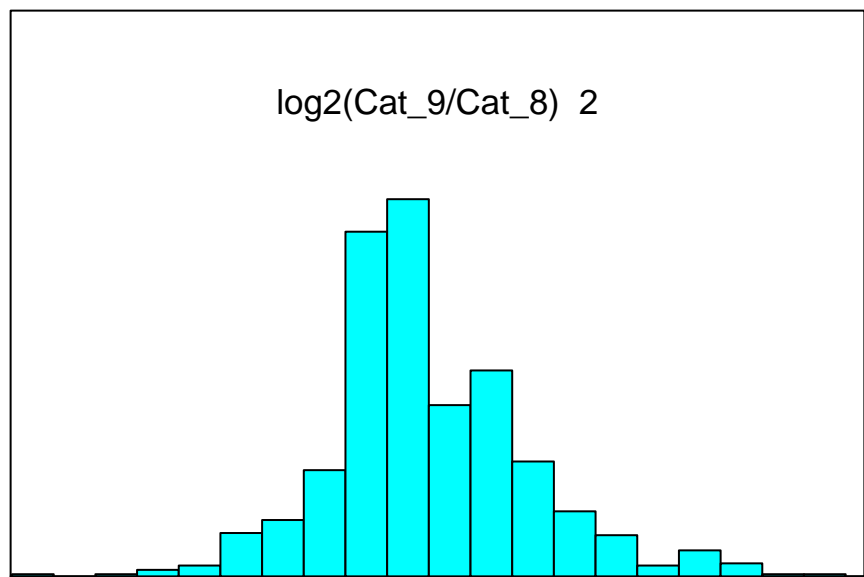

Supplement: supp [file elife-75798-supp-v1.zip]

**P-value vs Fold change**

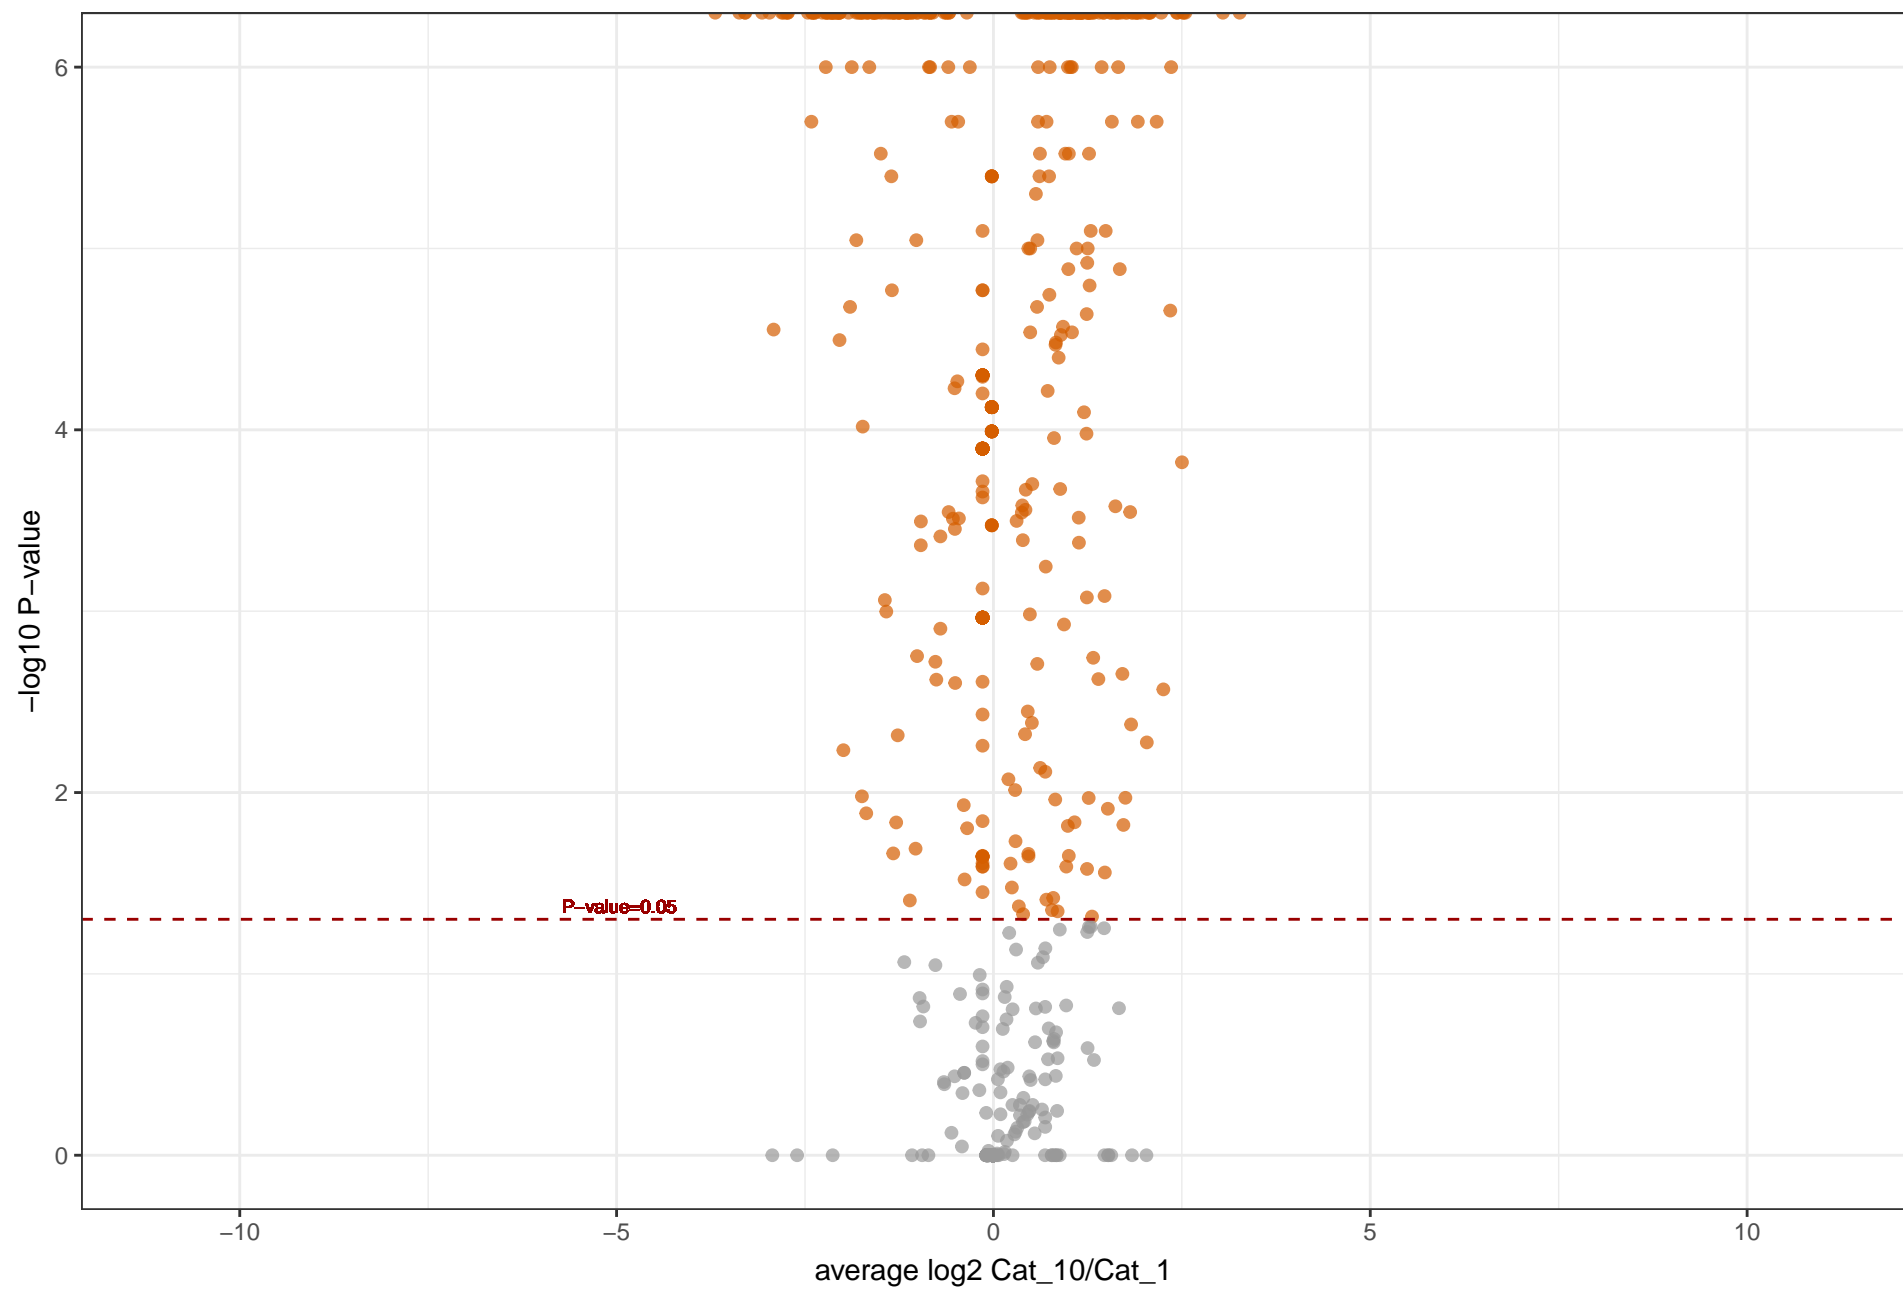

Supplement: supp [file elife-75798-supp-v1.zip]

MA plot

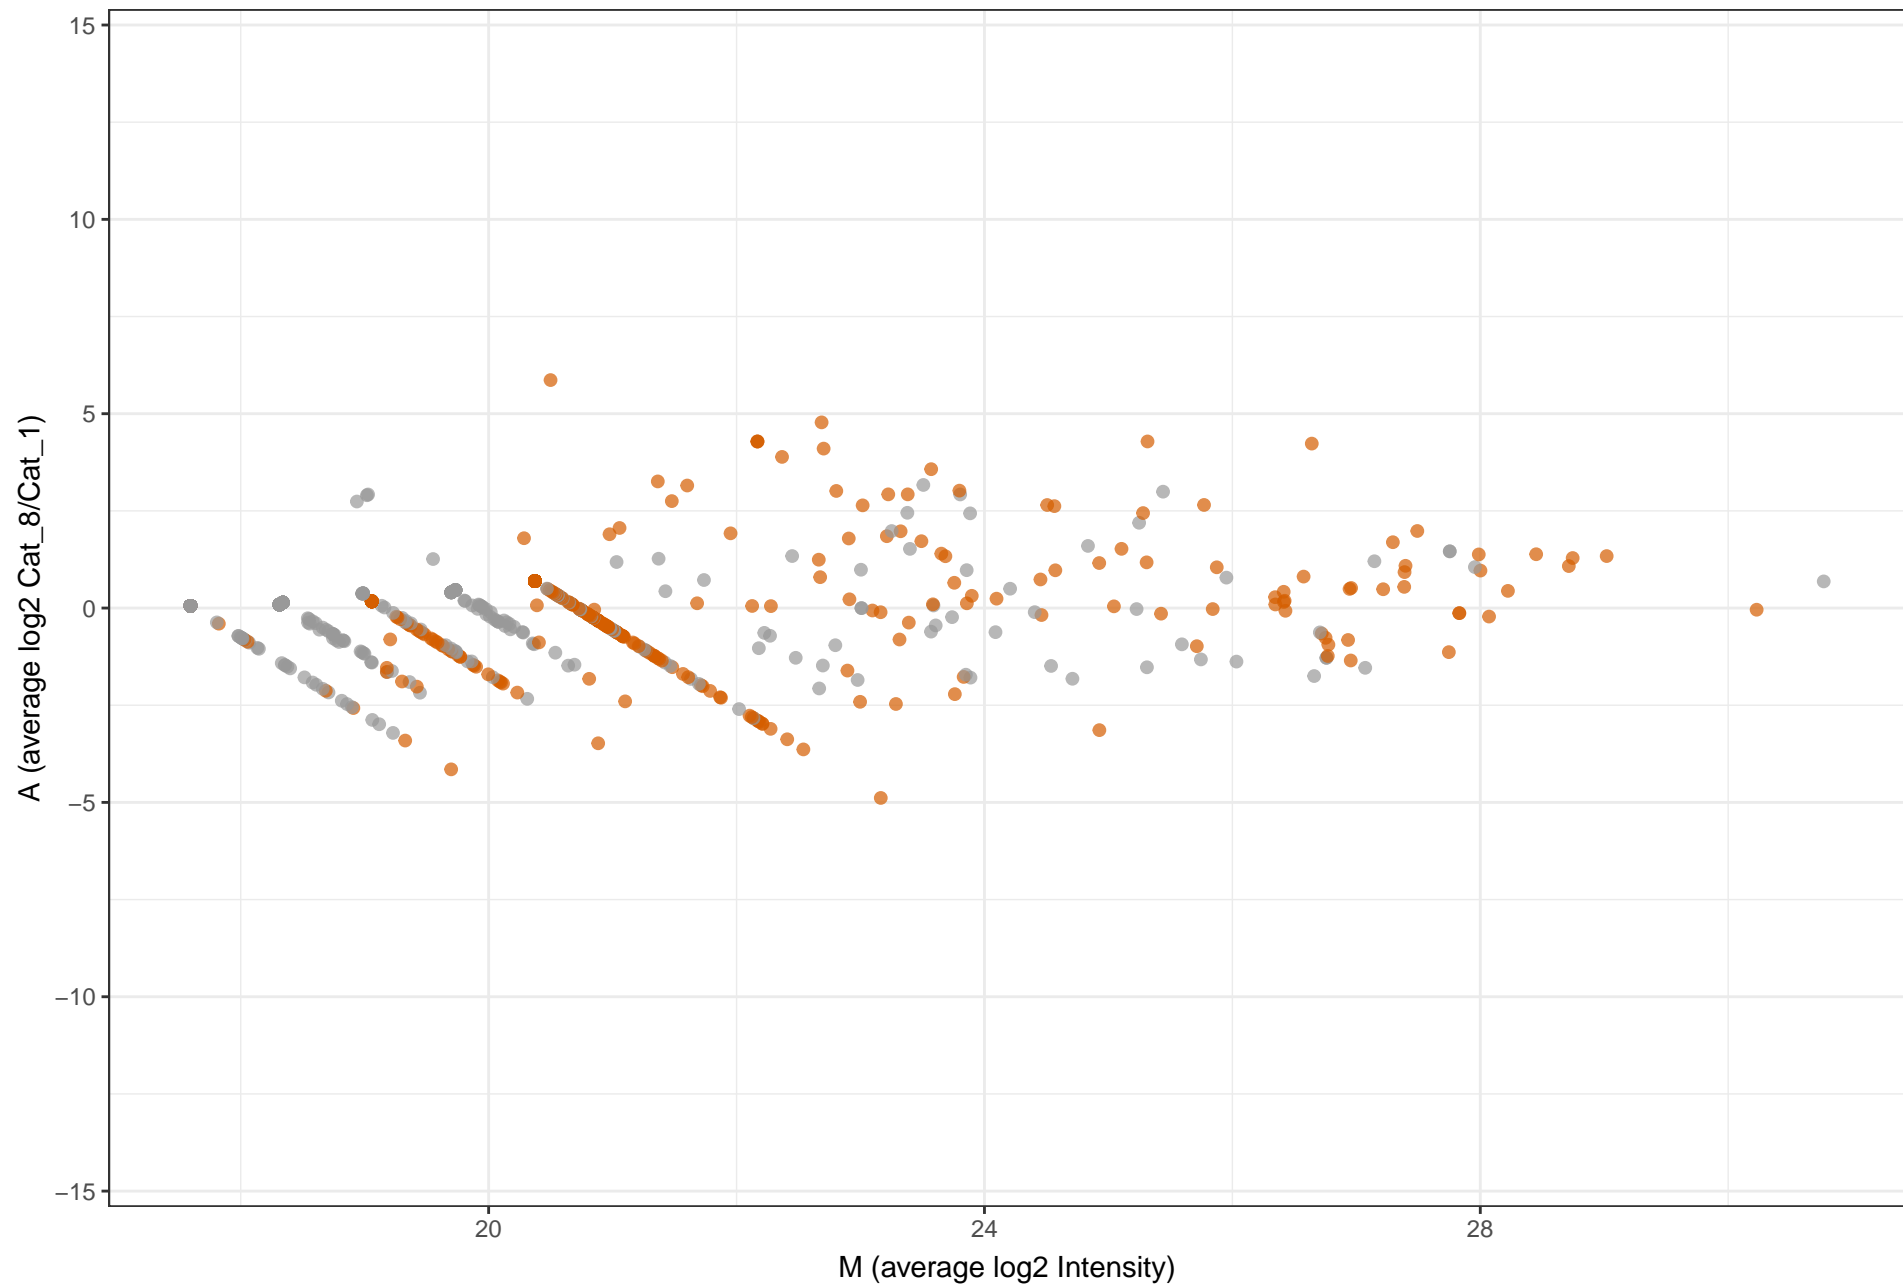

Supplement: supp [file elife-75798-supp-v1.zip]

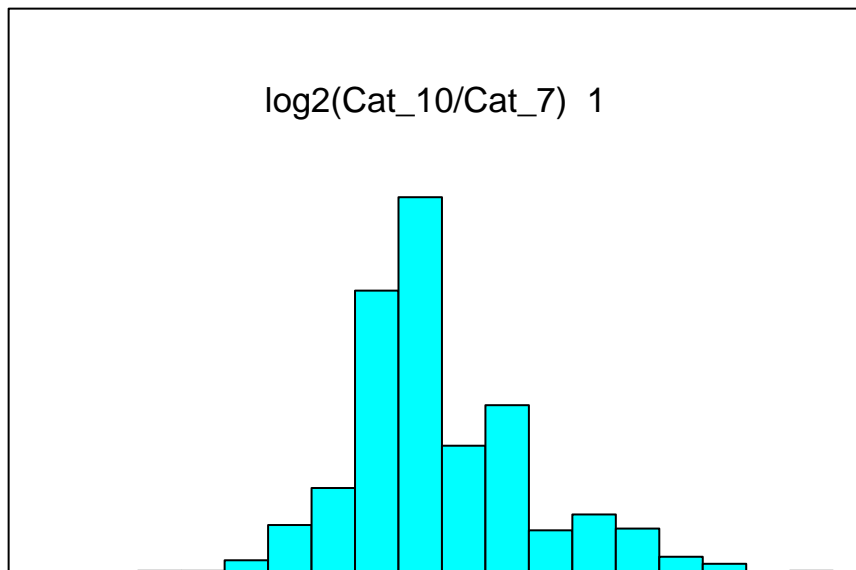

-5 0 5

5  
0  
-5

0.85

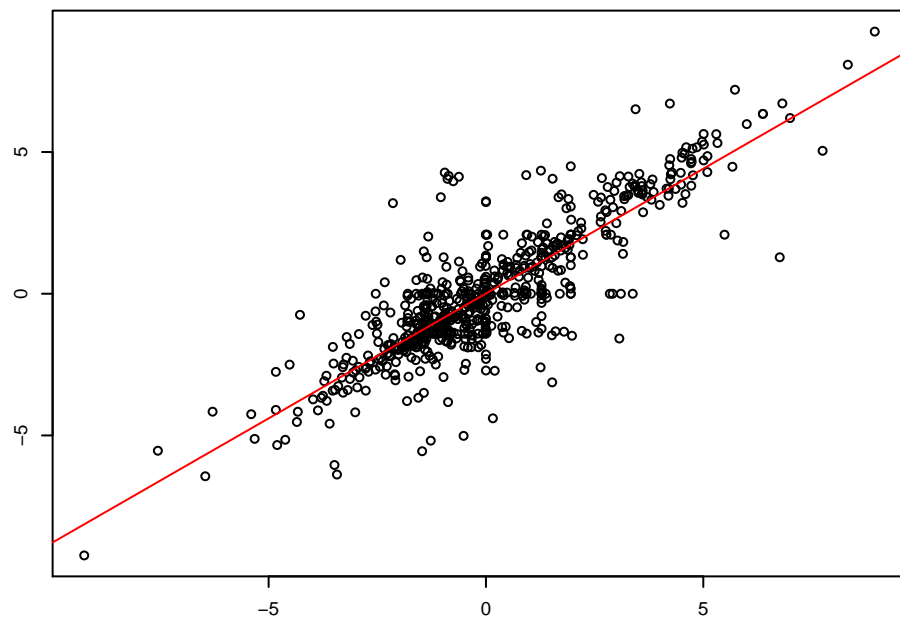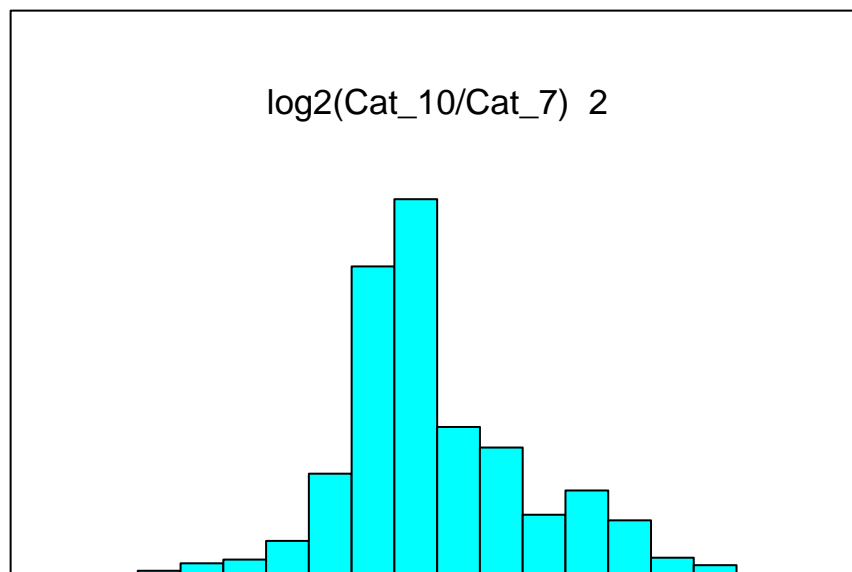

Supplement: supp [file elife-75798-supp-v1.zip]

P-value vs Fold change

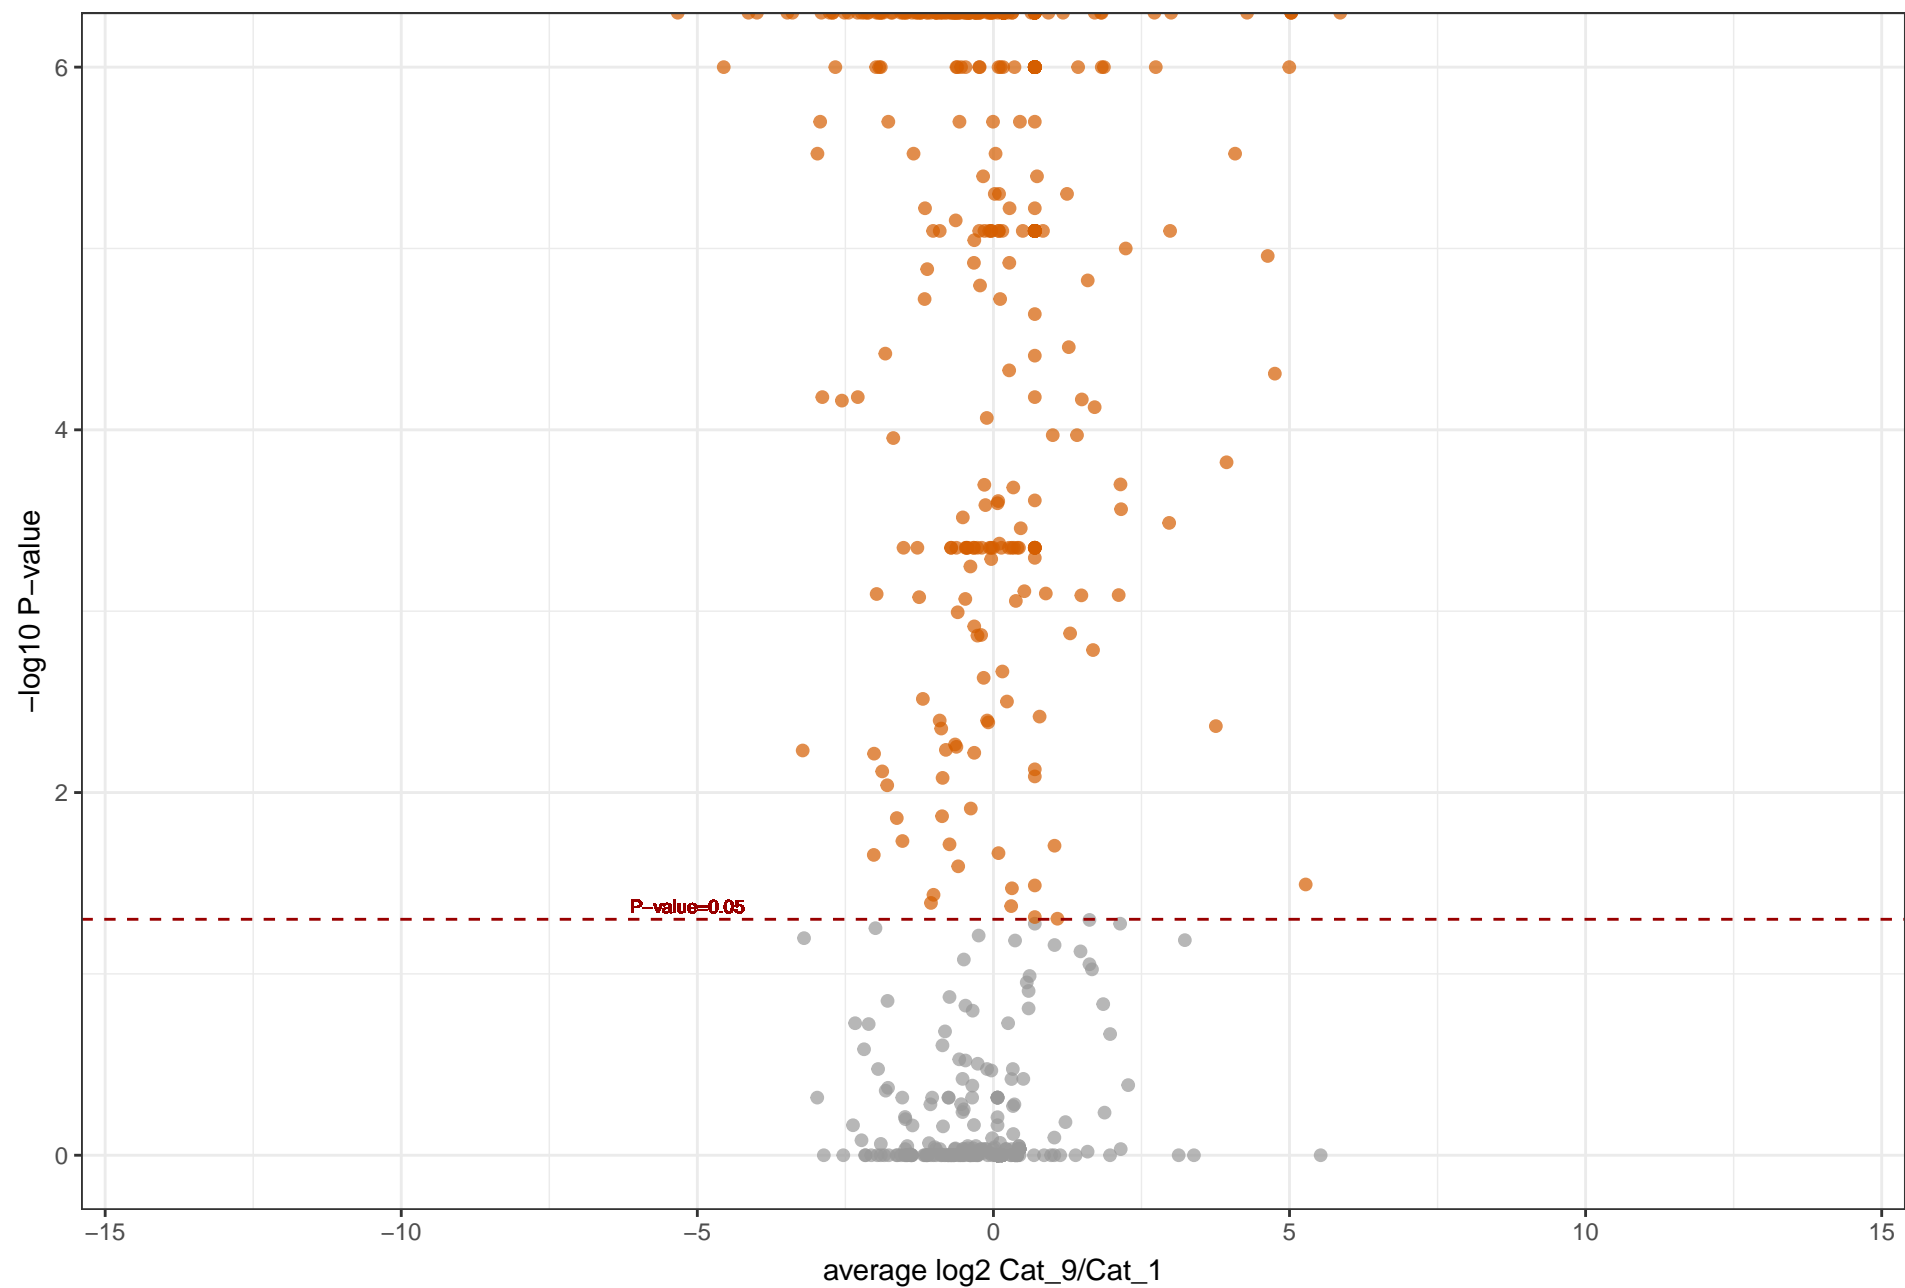

Supplement: supp [file elife-75798-supp-v1.zip]

MA plot

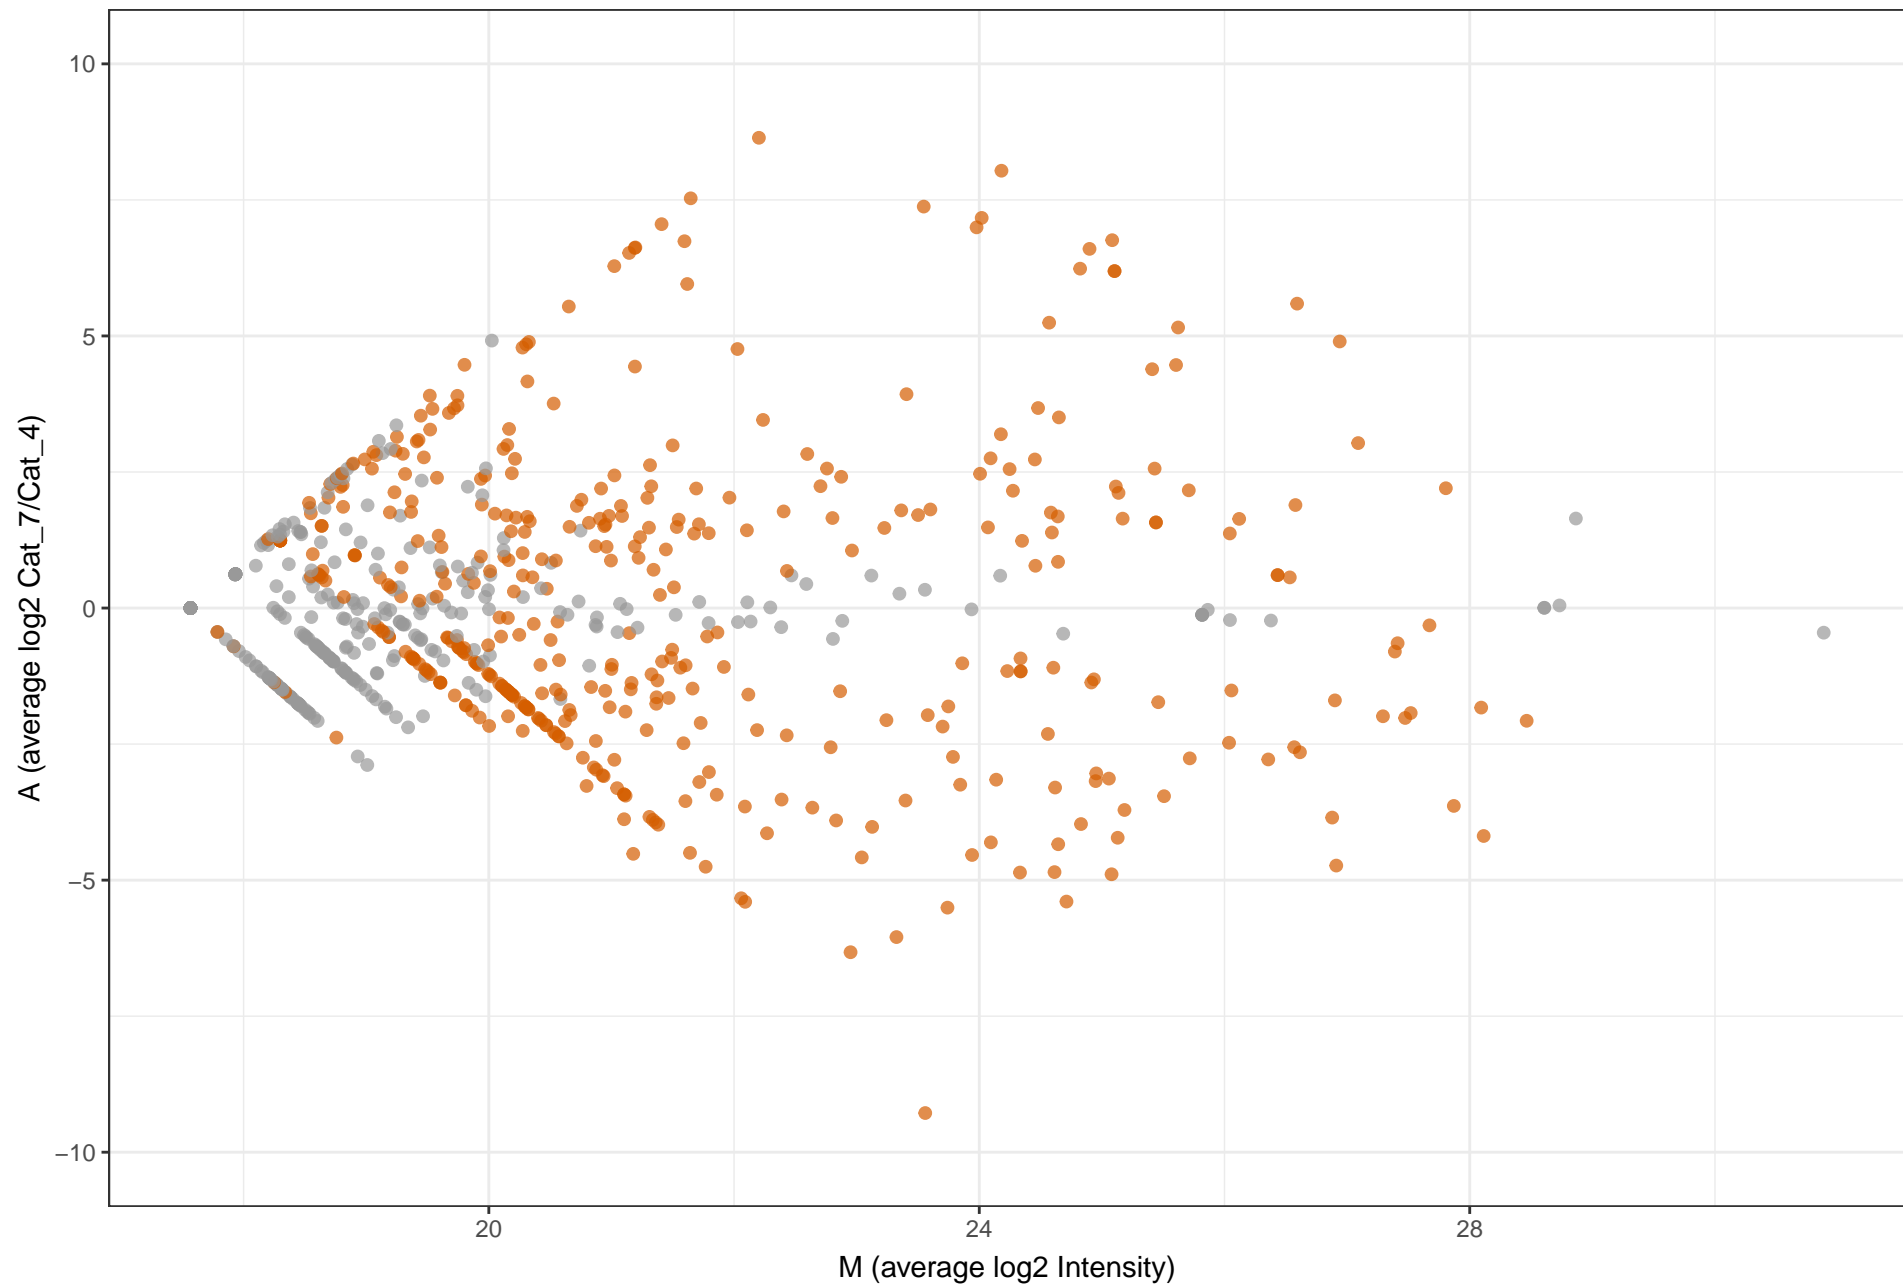

Supplement: supp [file elife-75798-supp-v1.zip]

Value-ordered fold change

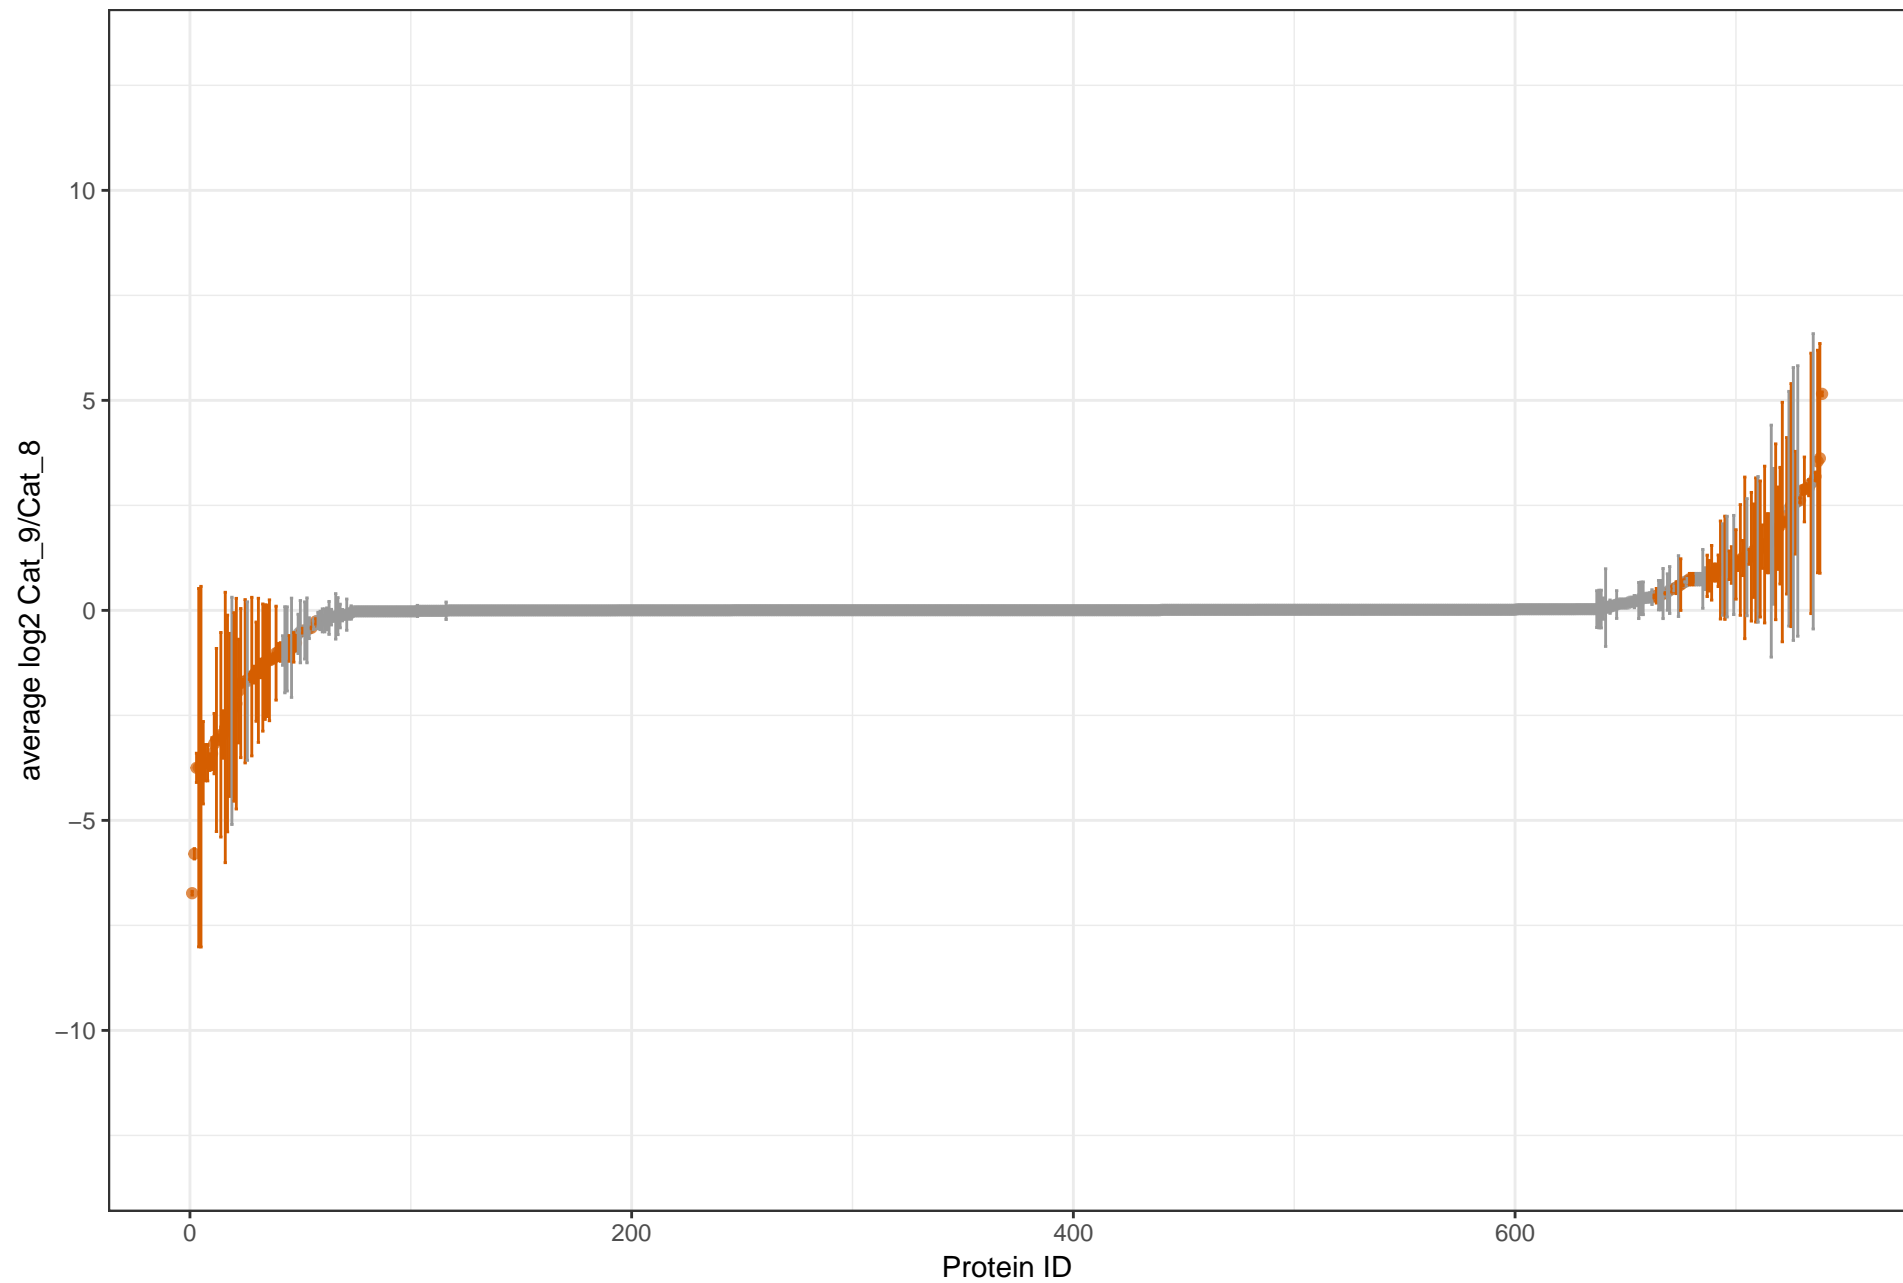

Supplement: supp [file elife-75798-supp-v1.zip]

Value-ordered fold change

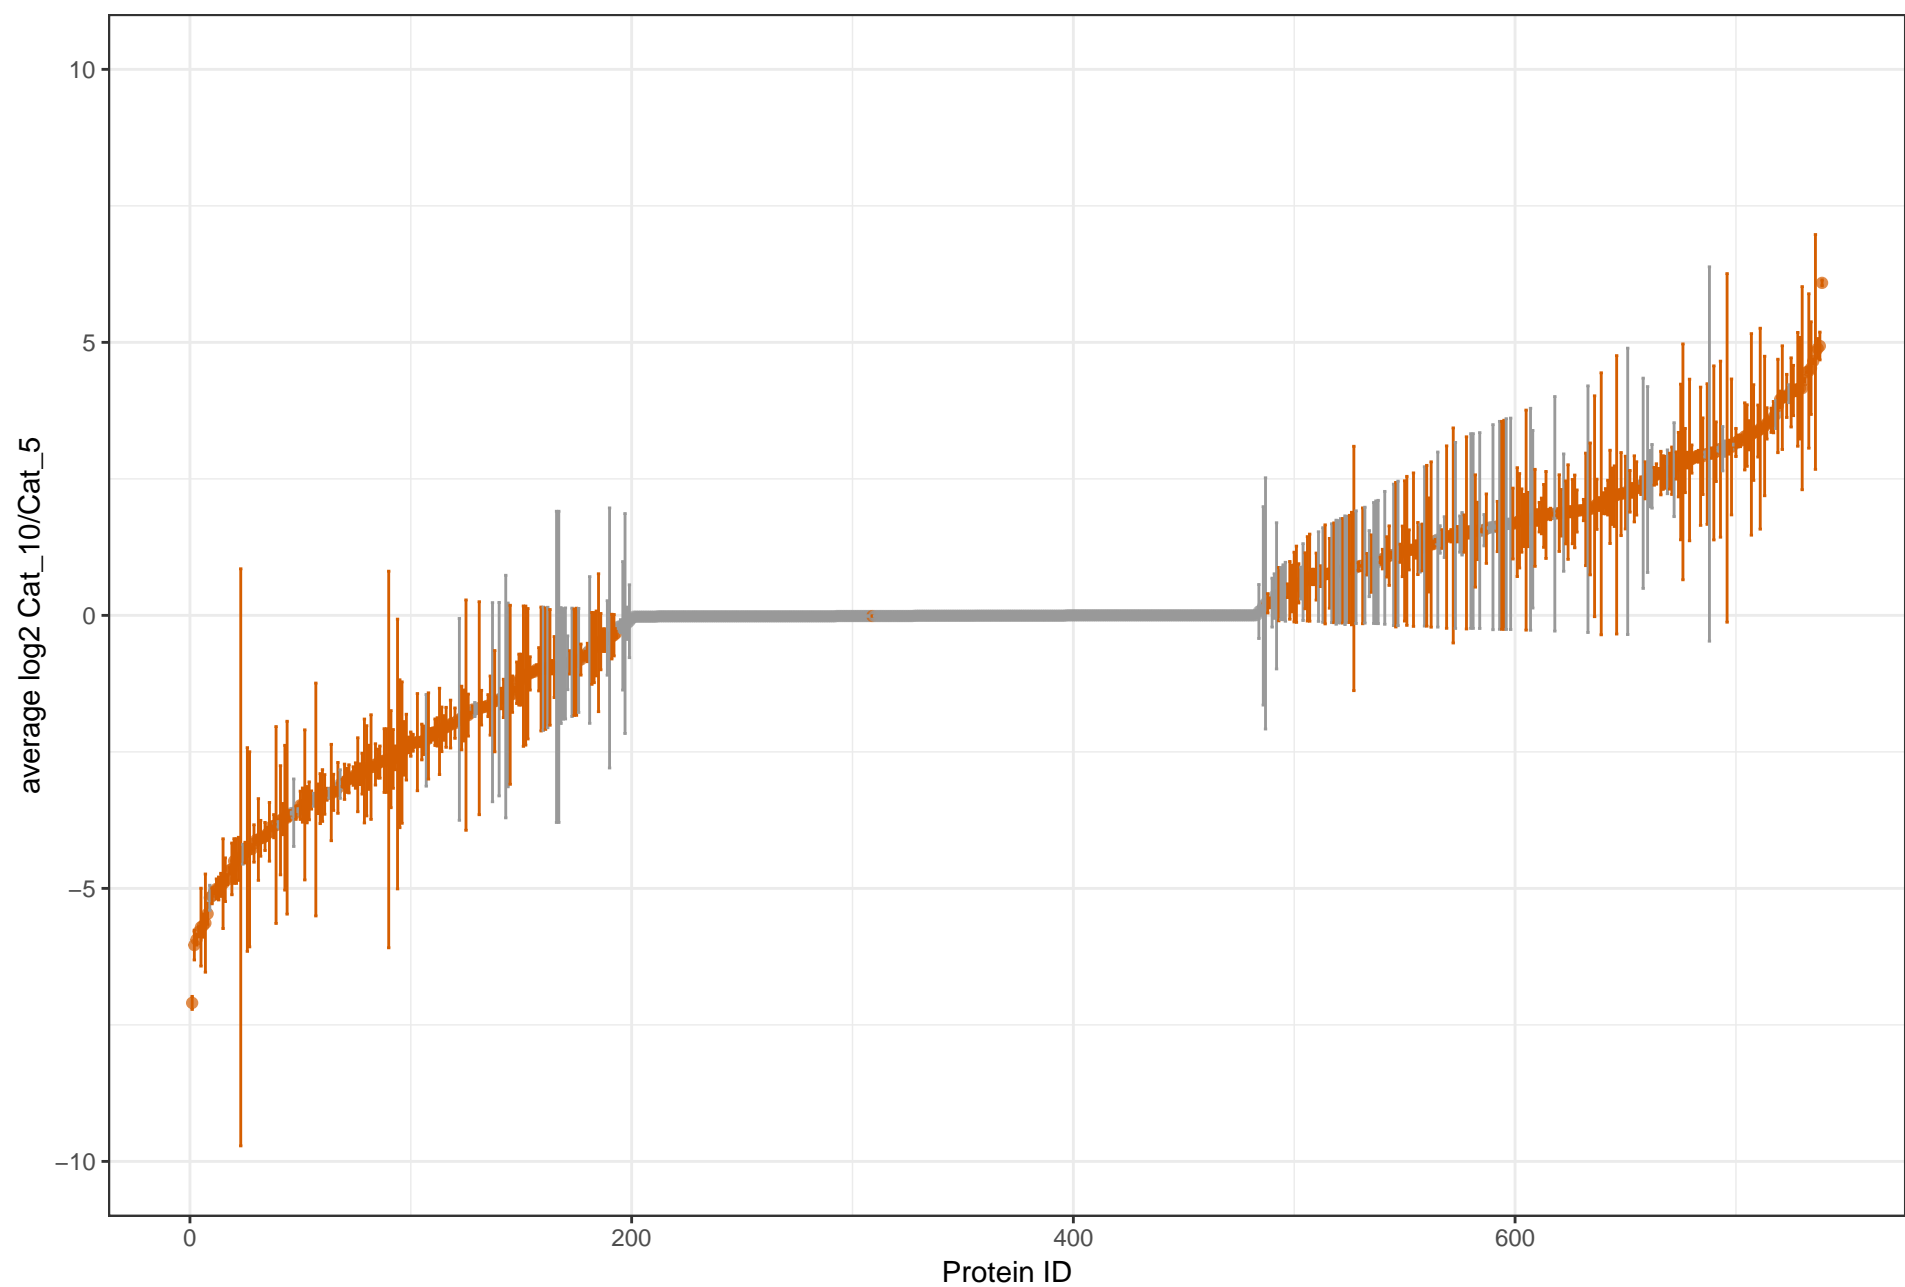

Supplement: supp [file elife-75798-supp-v1.zip]

Value-ordered fold change

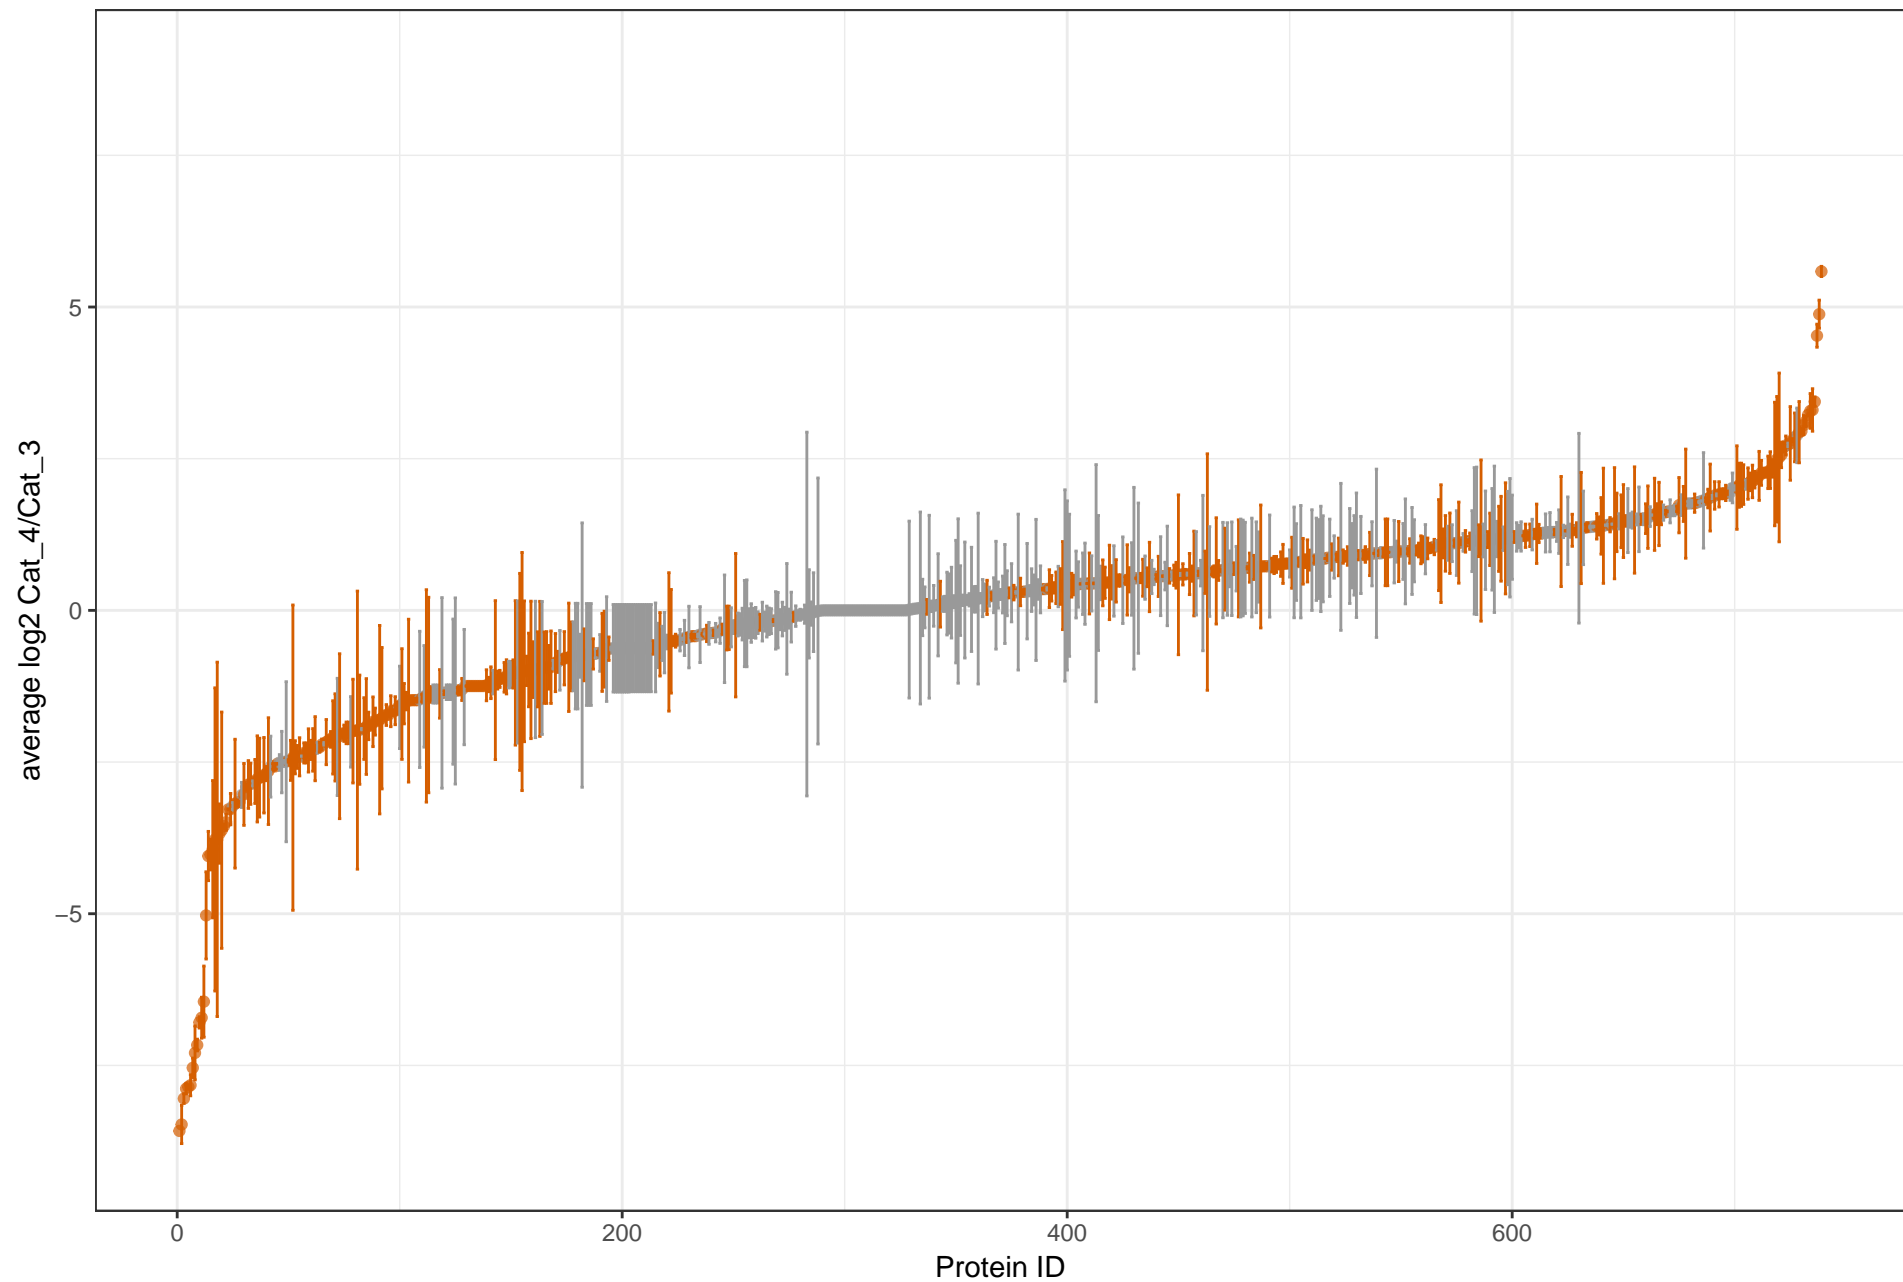

Supplement: supp [file elife-75798-supp-v1.zip]

Value-ordered fold change

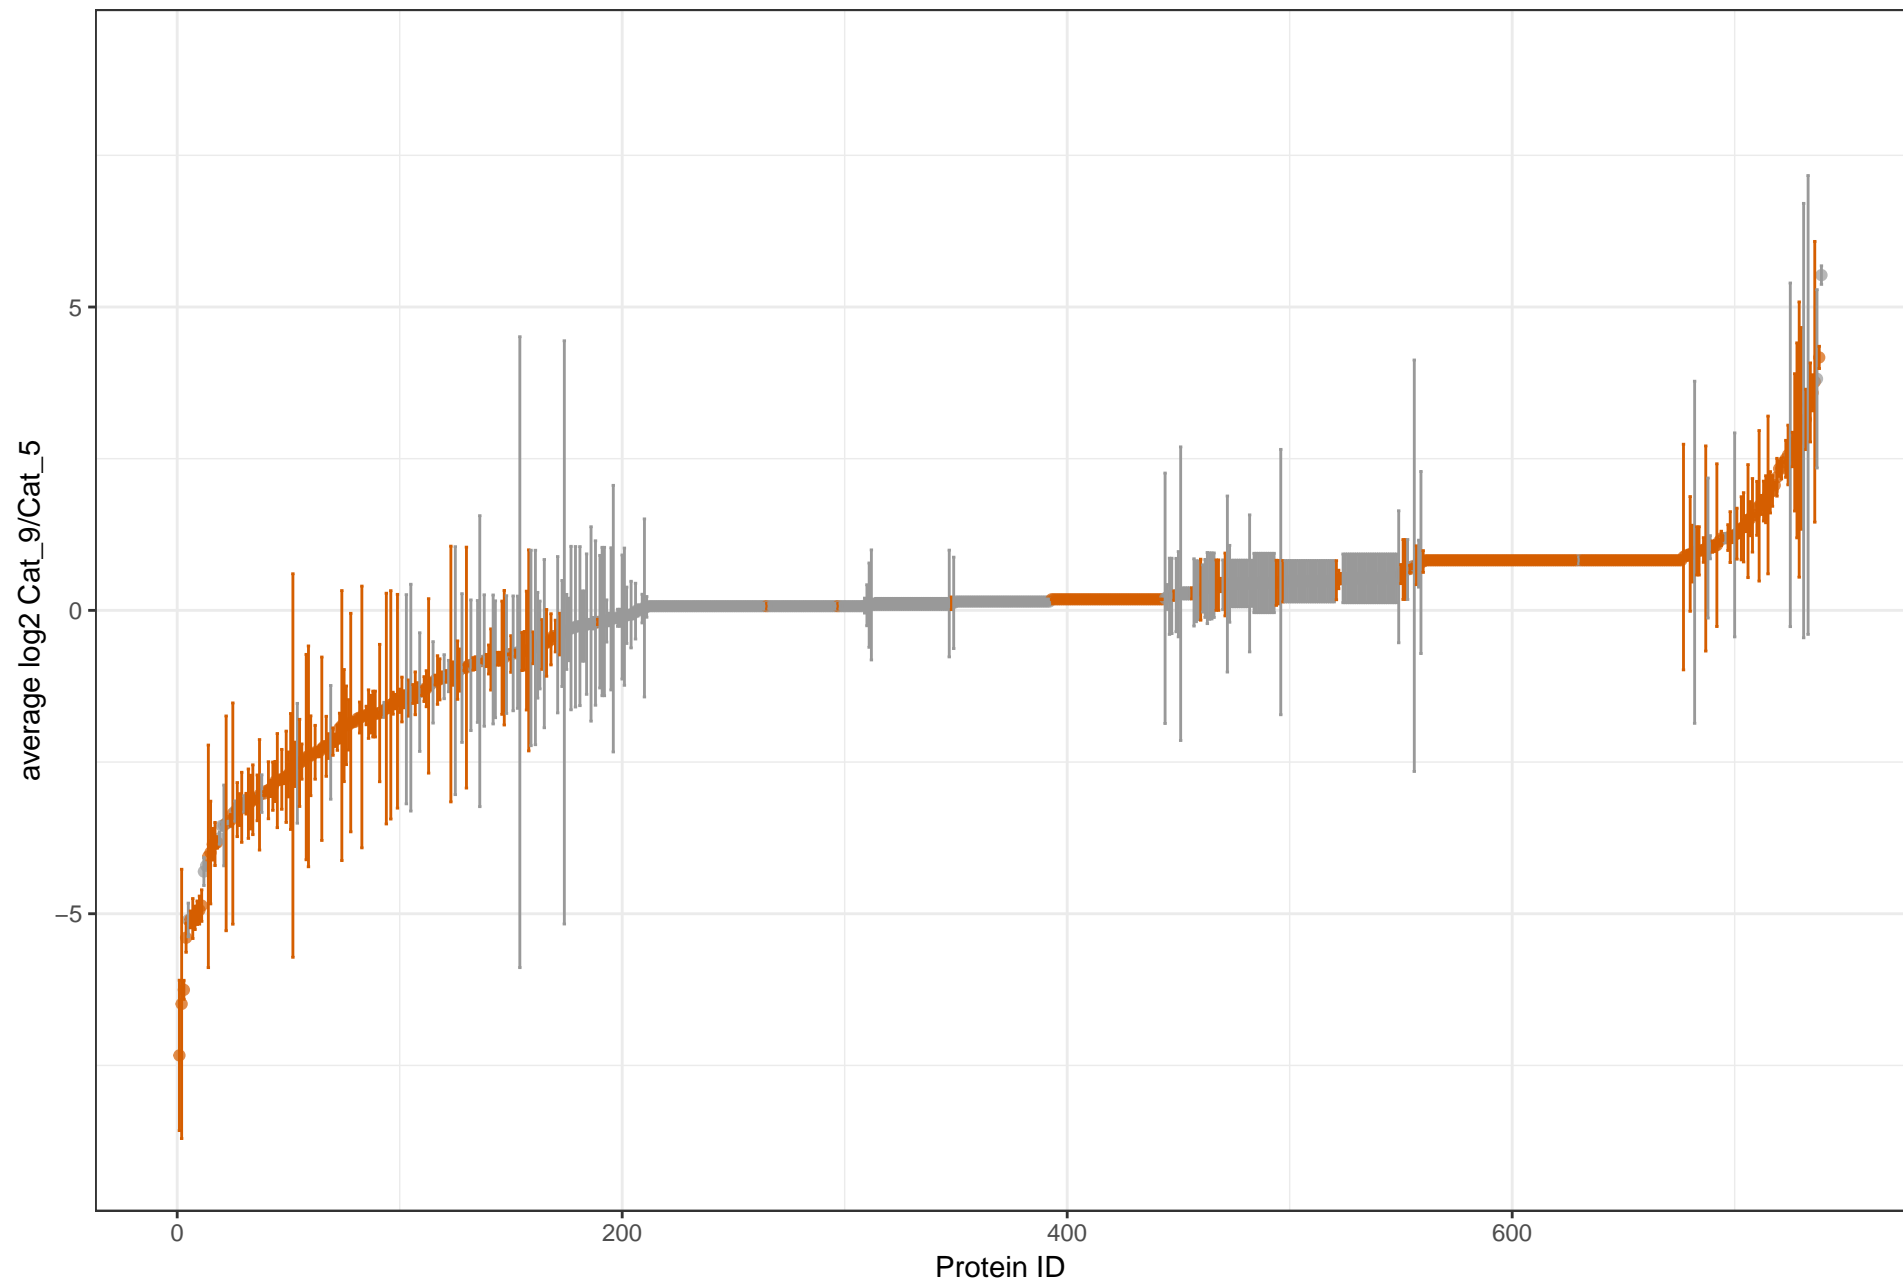

Supplement: supp [file elife-75798-supp-v1.zip]

Value-ordered fold change

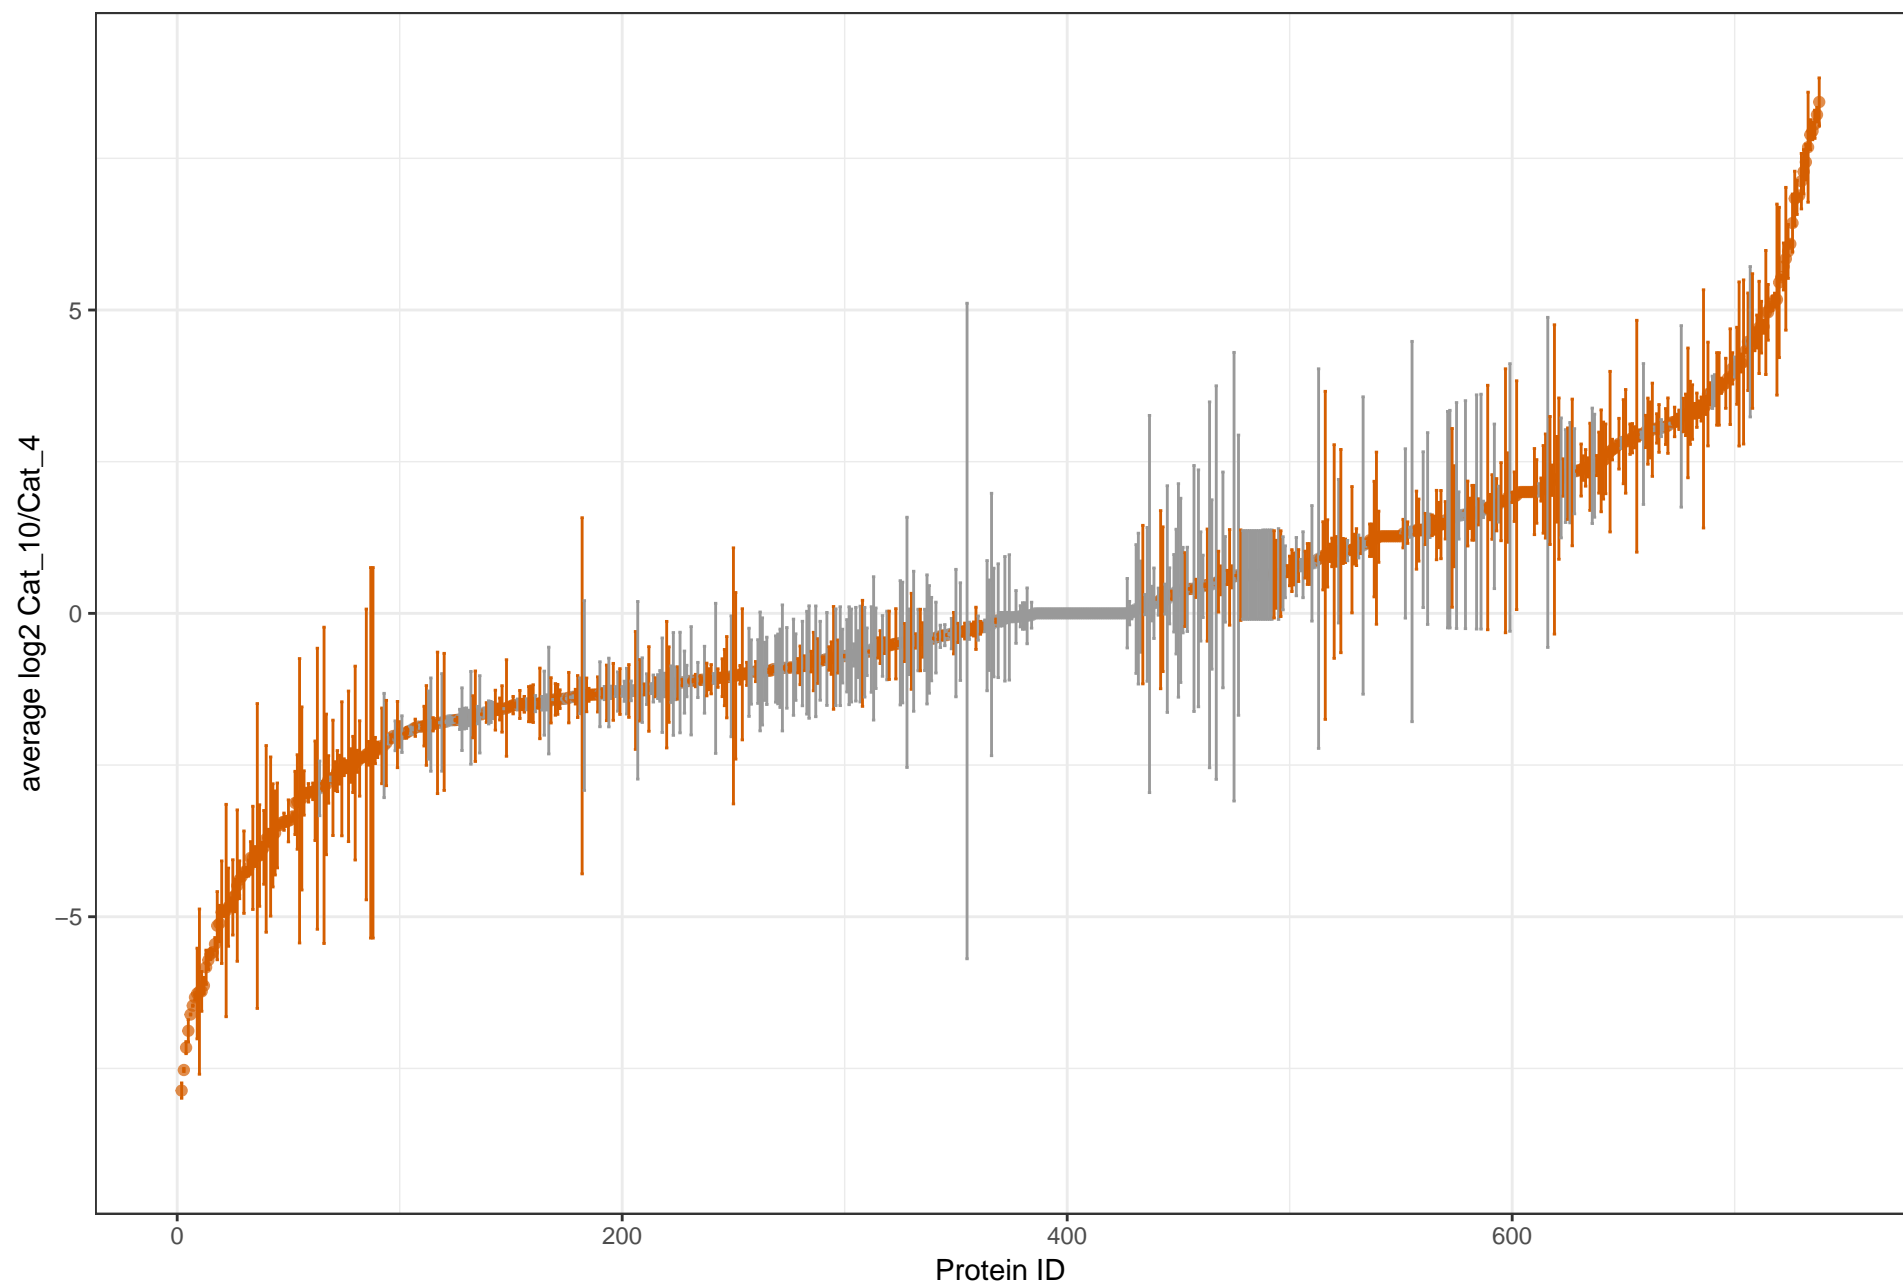

Supplement: supp [file elife-75798-supp-v1.zip]

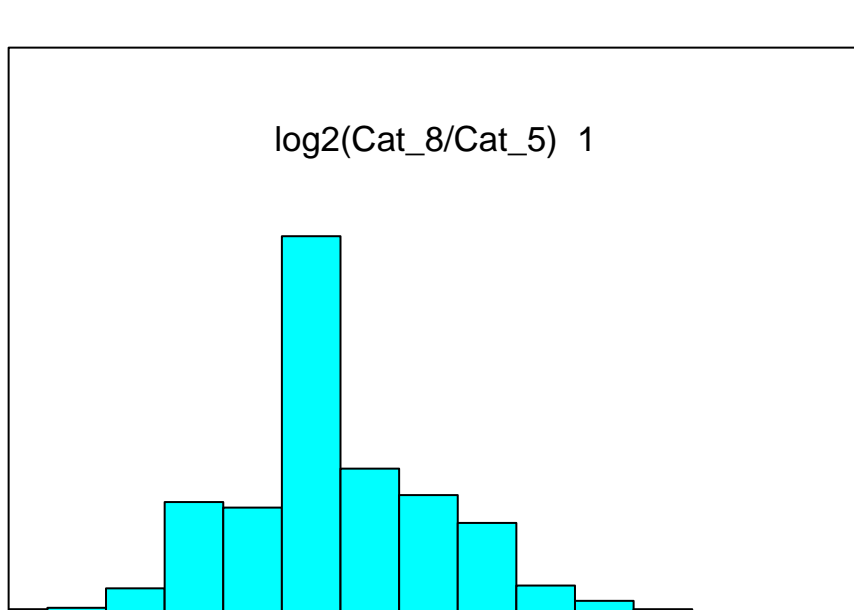

0.79

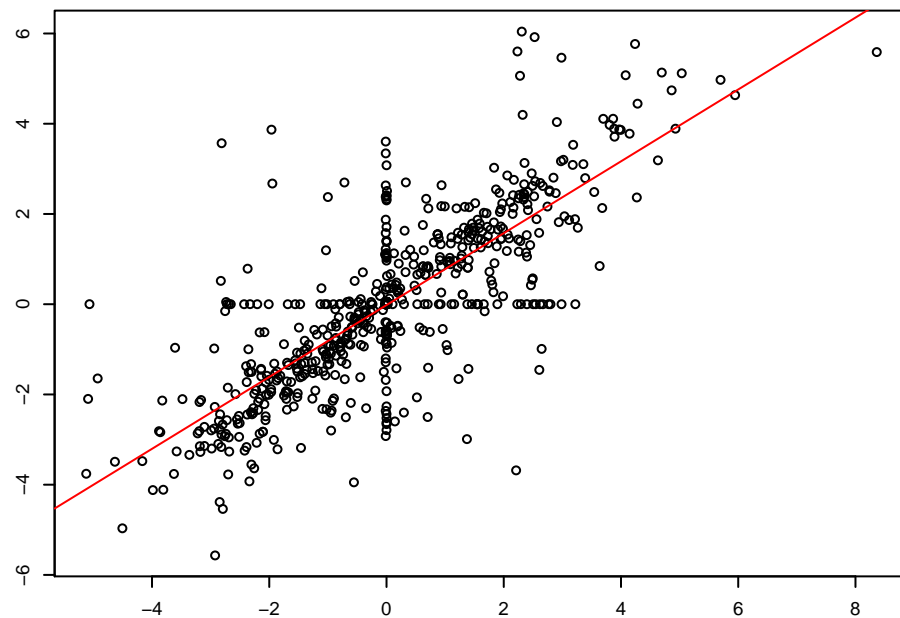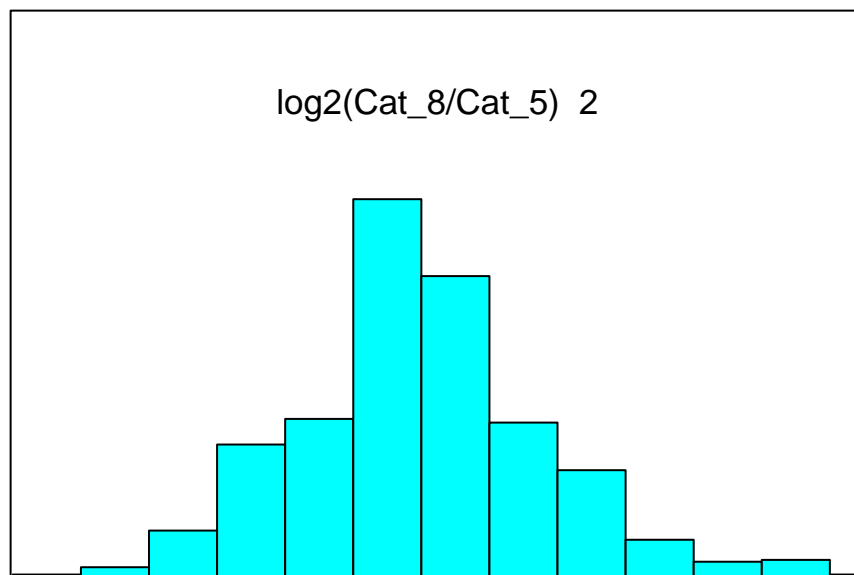

Supplement: supp [file elife-75798-supp-v1.zip]

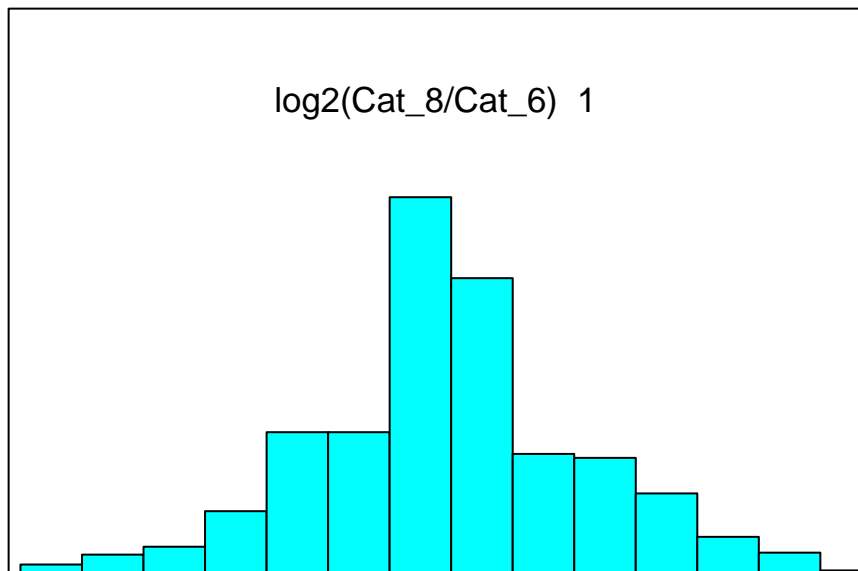

-6 -4 -2 0 2 4 6

6

4

2

0

-2

-4

-6

0.82

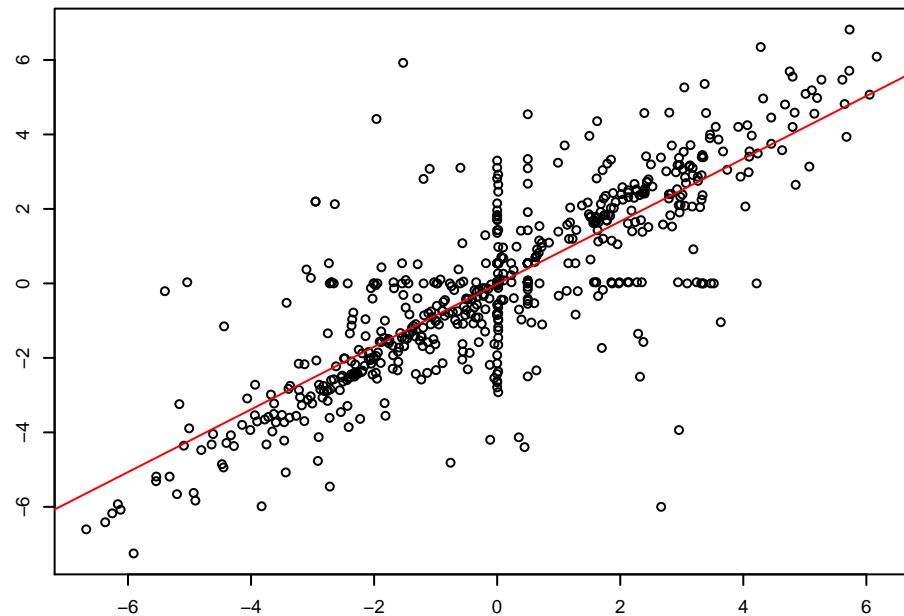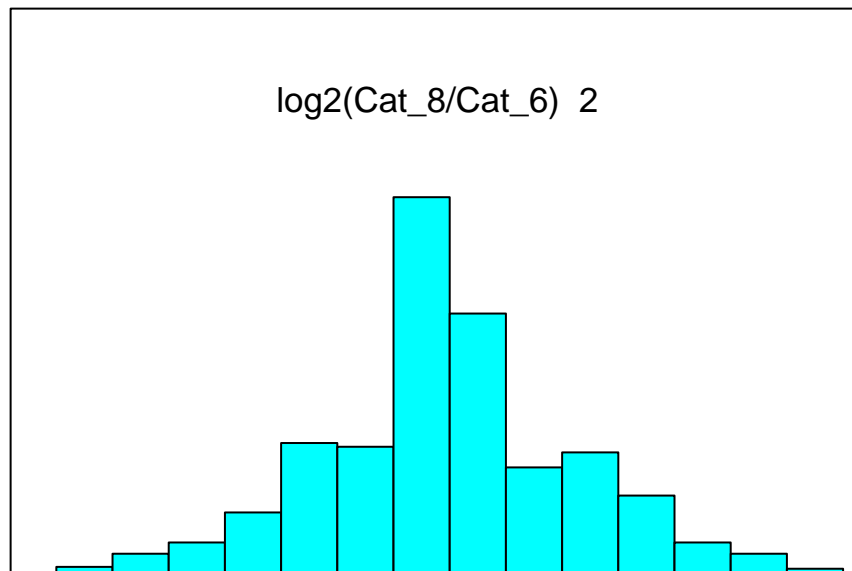

Supplement: supp [file elife-75798-supp-v1.zip]

MA plot

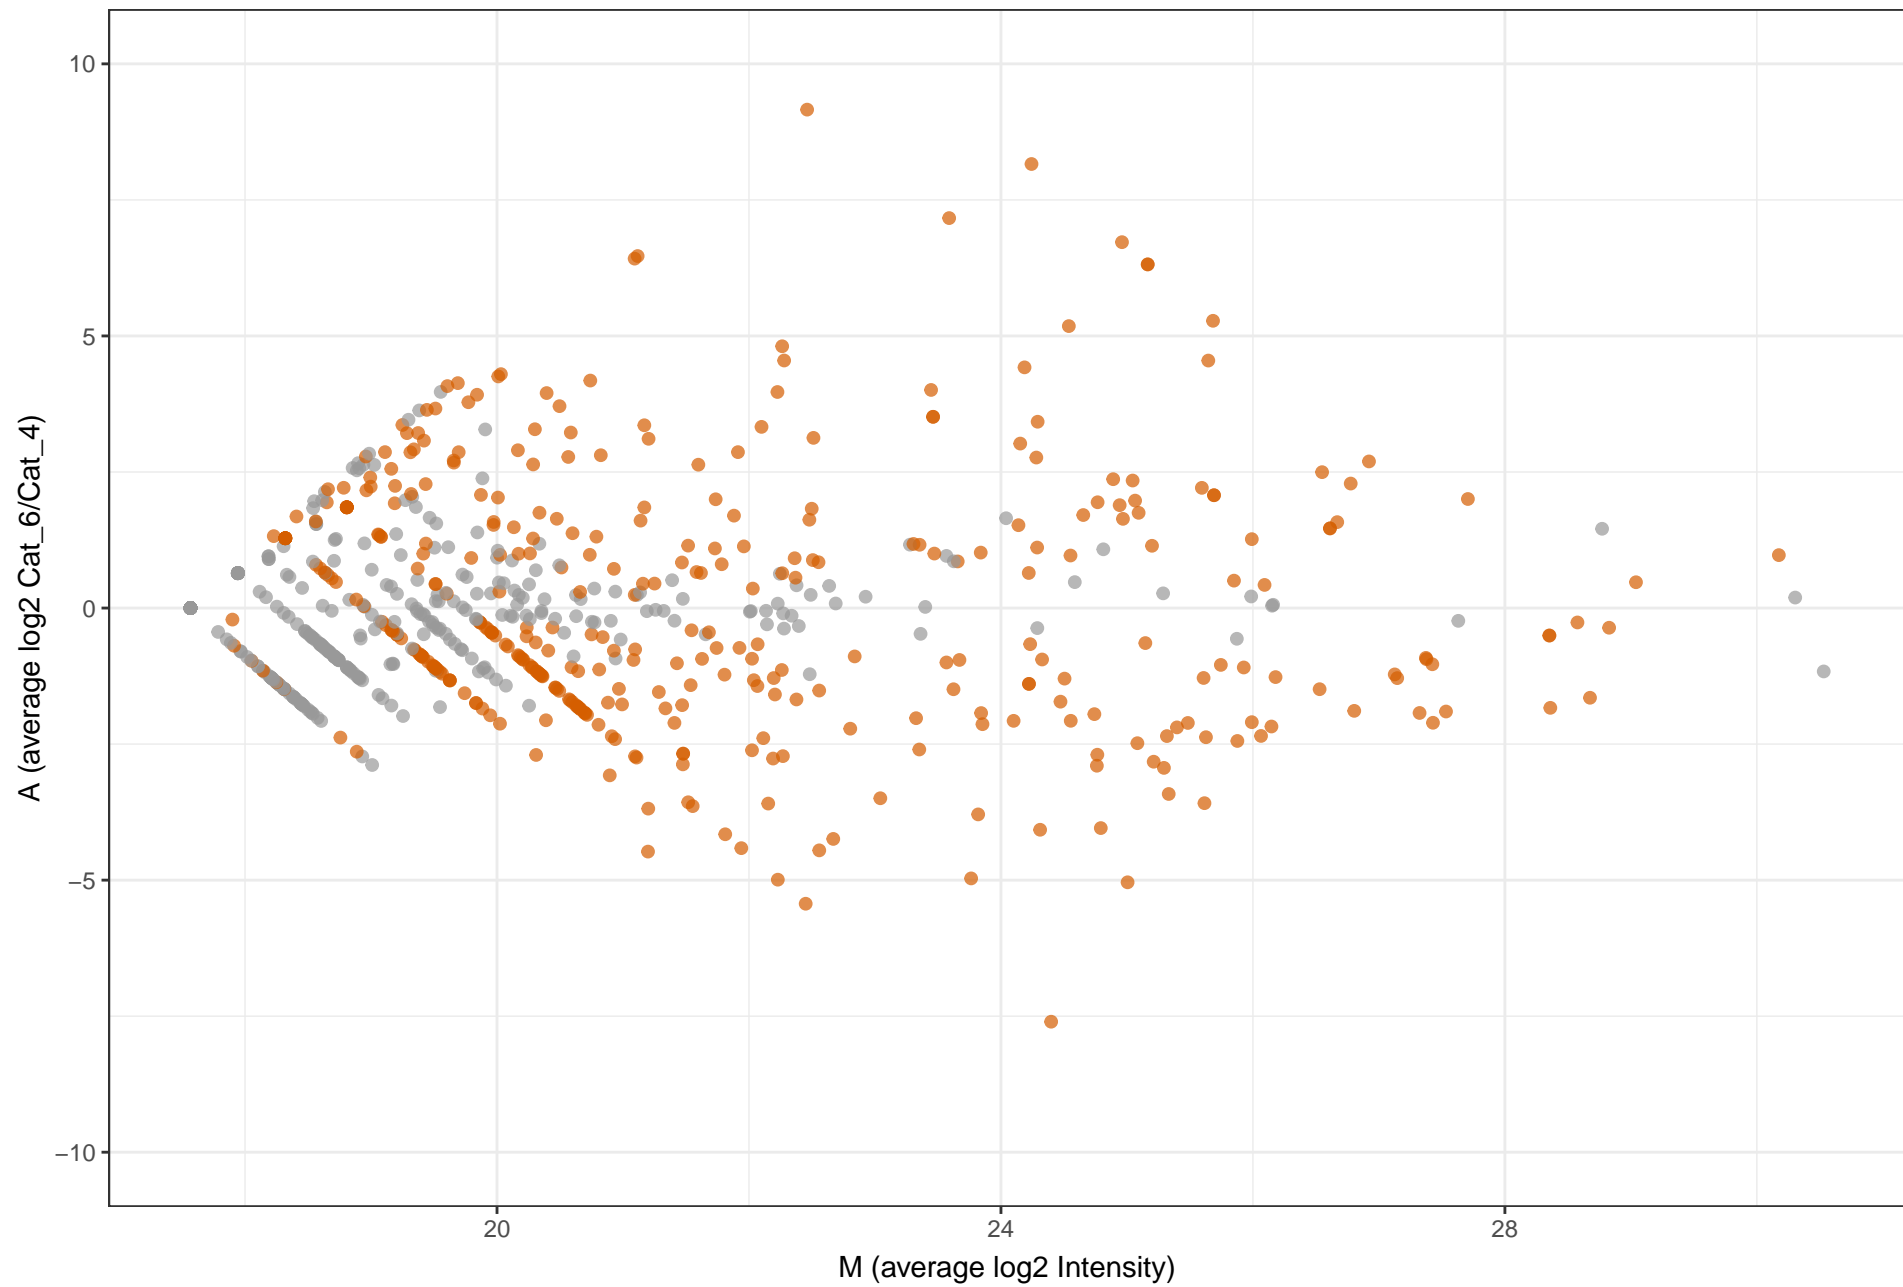

Supplement: supp [file elife-75798-supp-v1.zip]

P-value vs Fold change

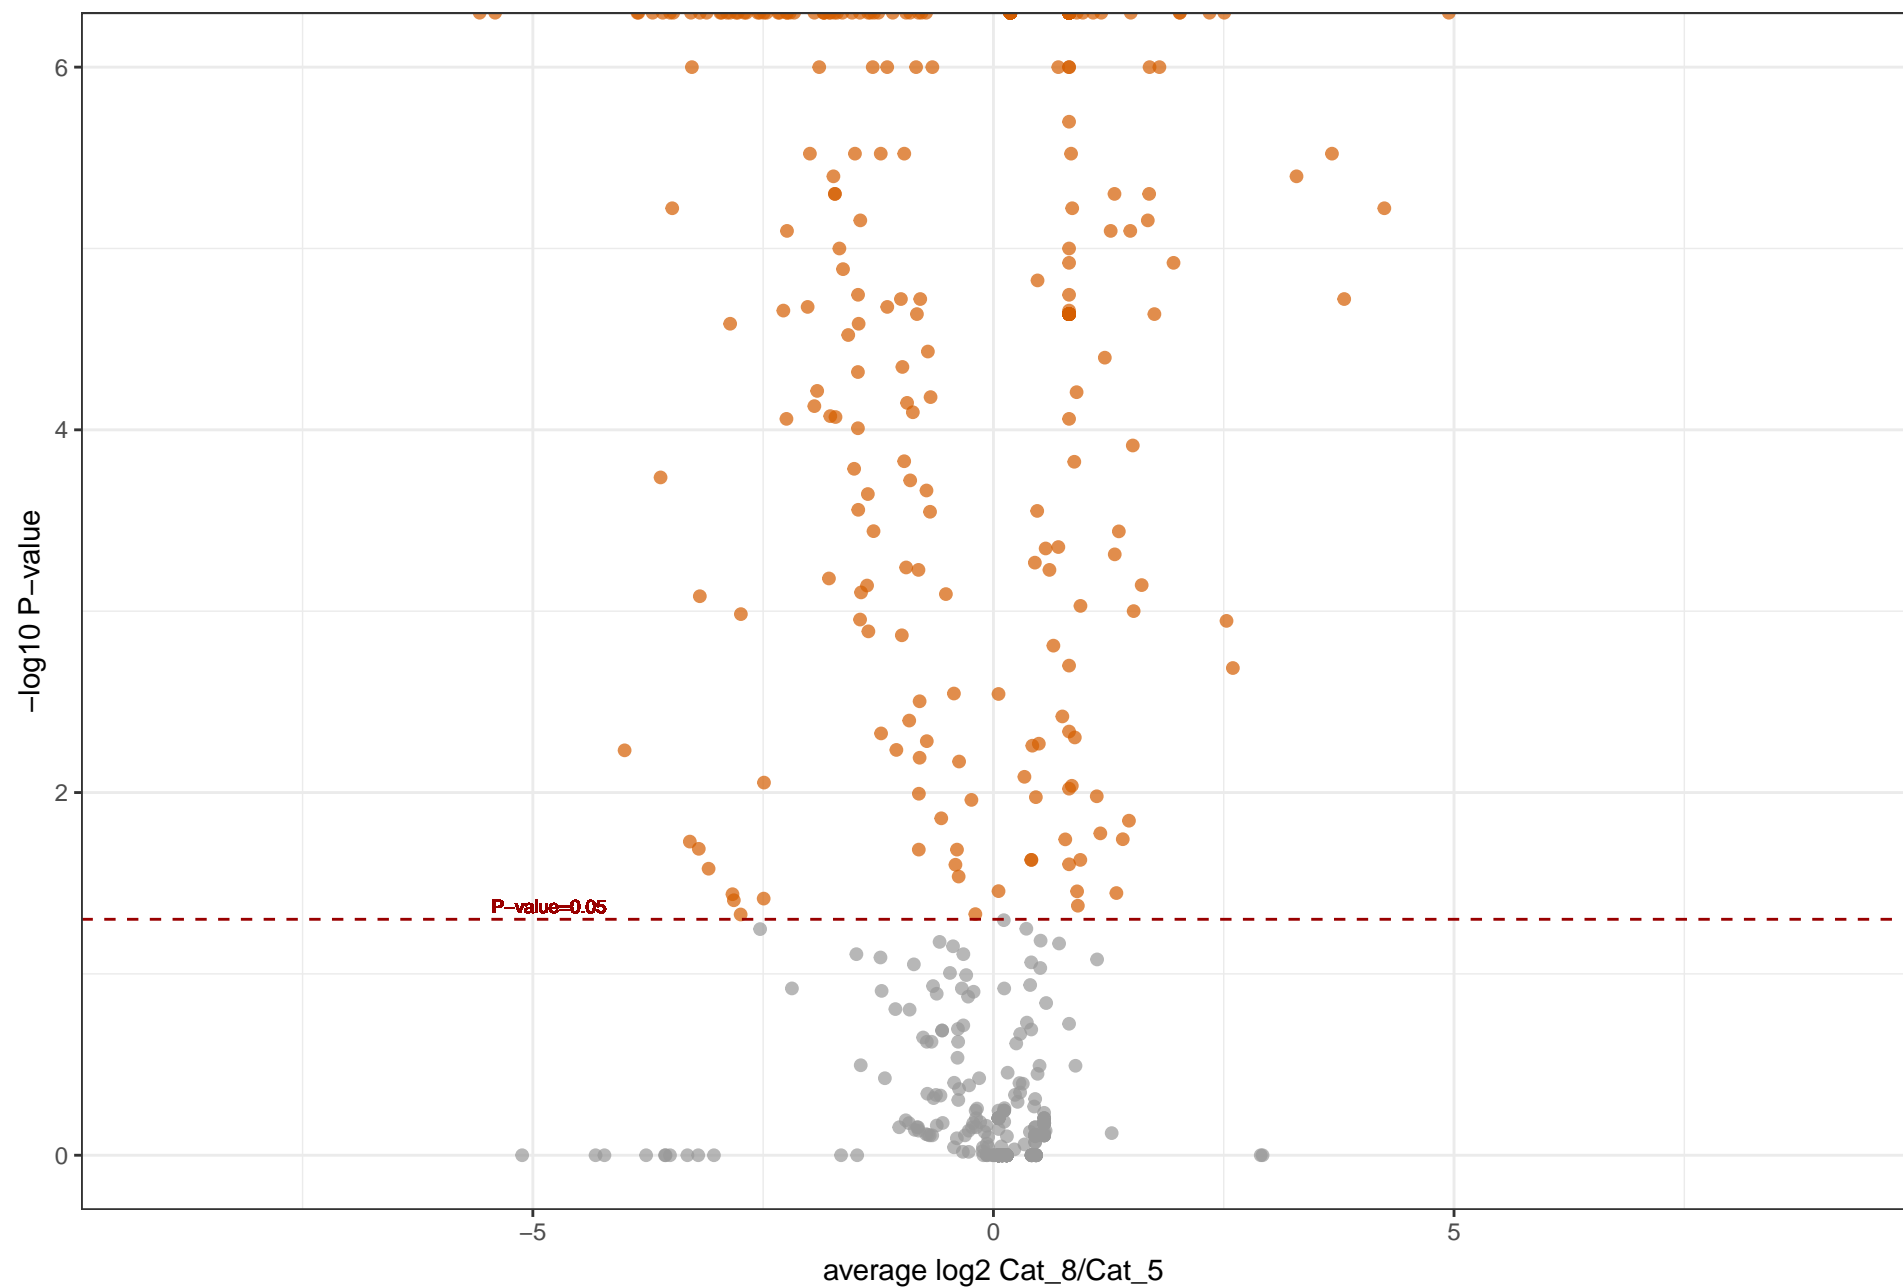

Supplement: supp [file elife-75798-supp-v1.zip]

MA plot

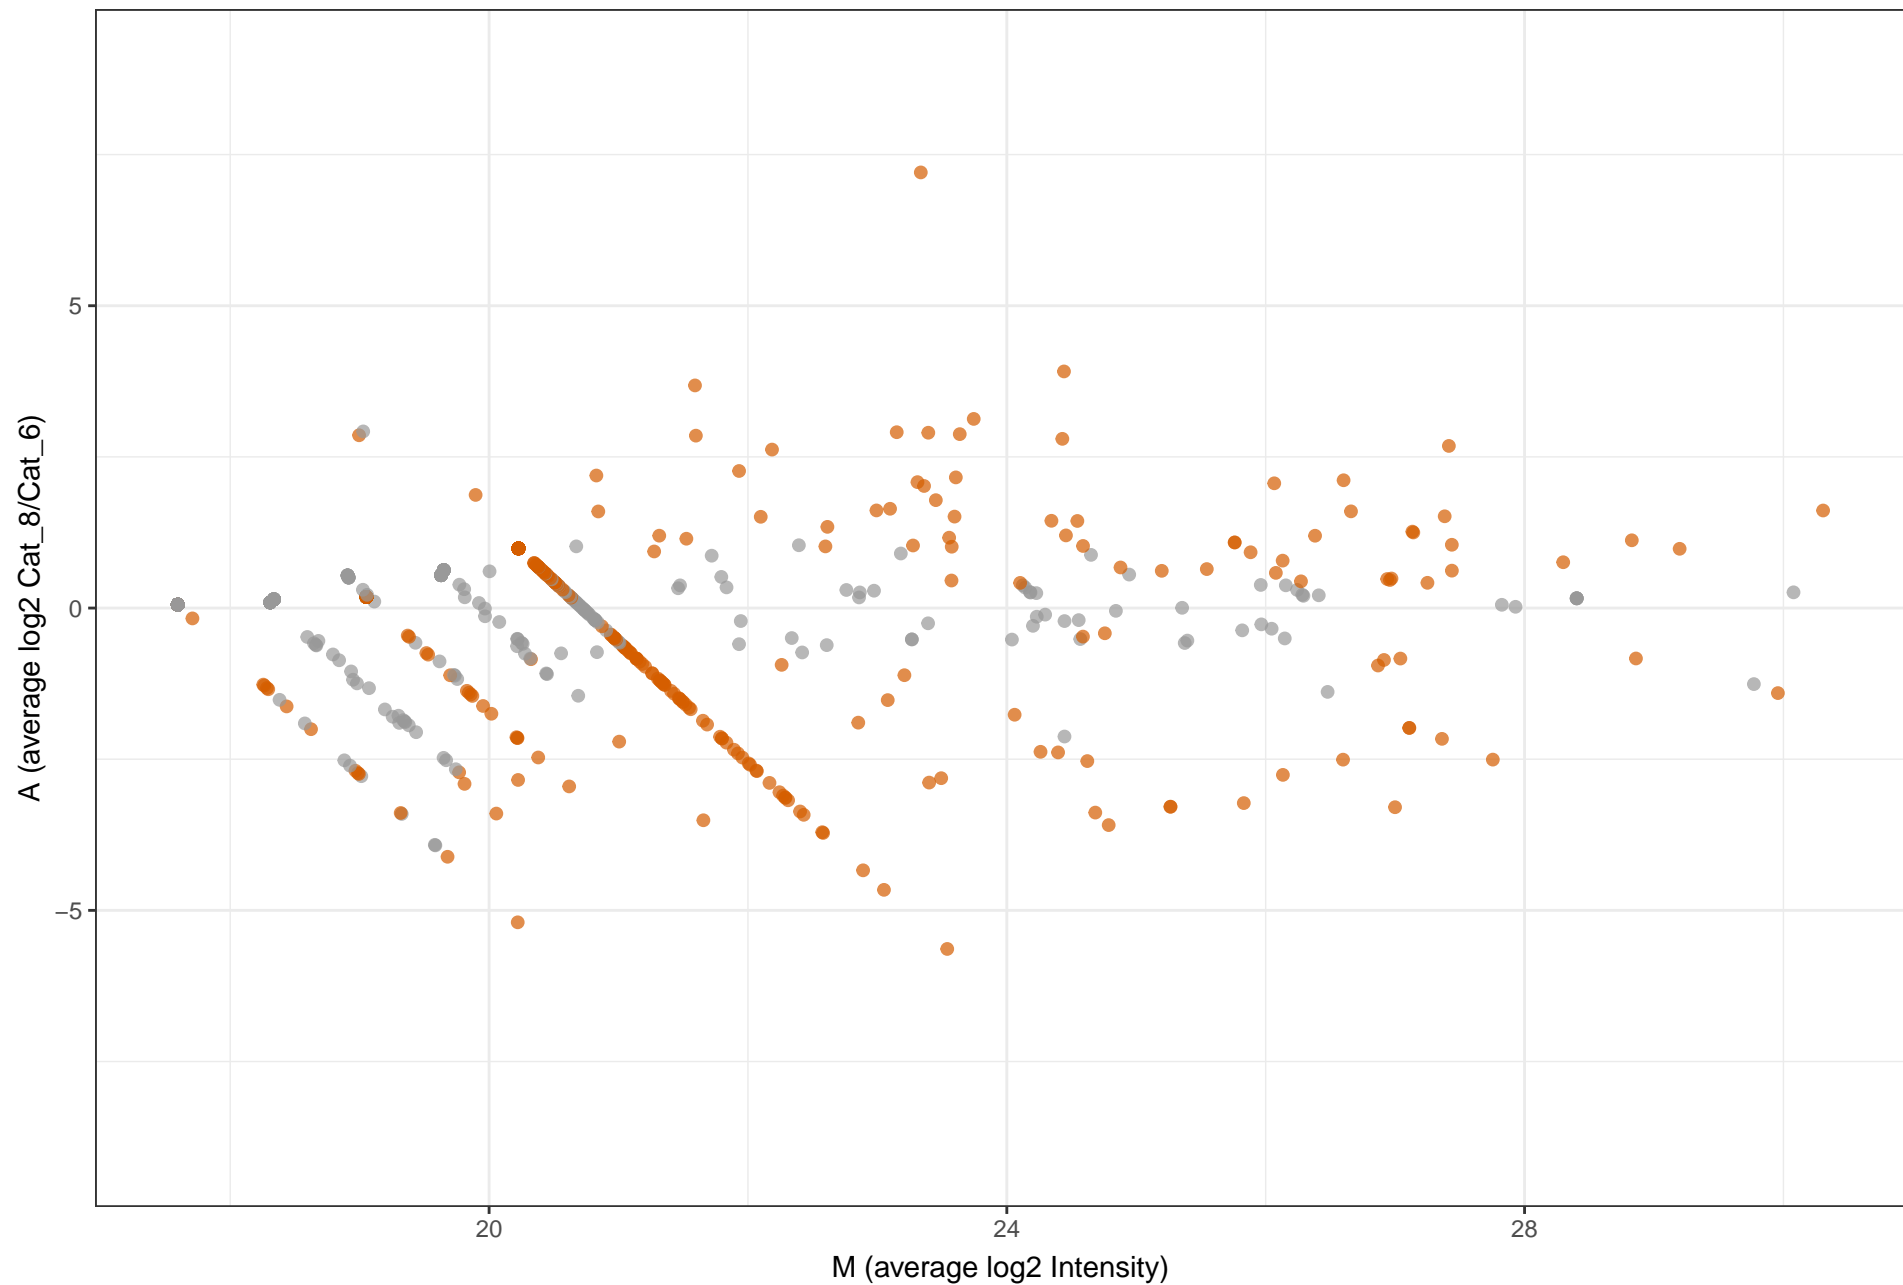

Supplement: supp [file elife-75798-supp-v1.zip]

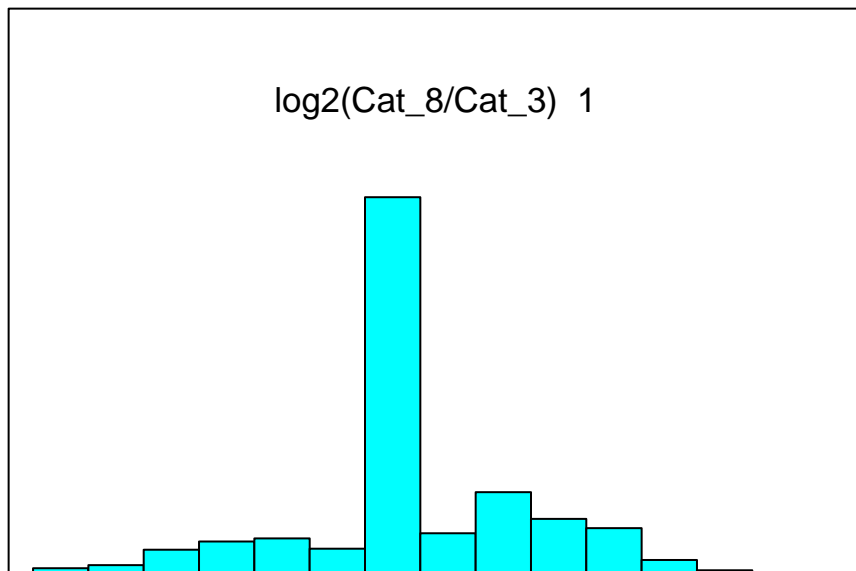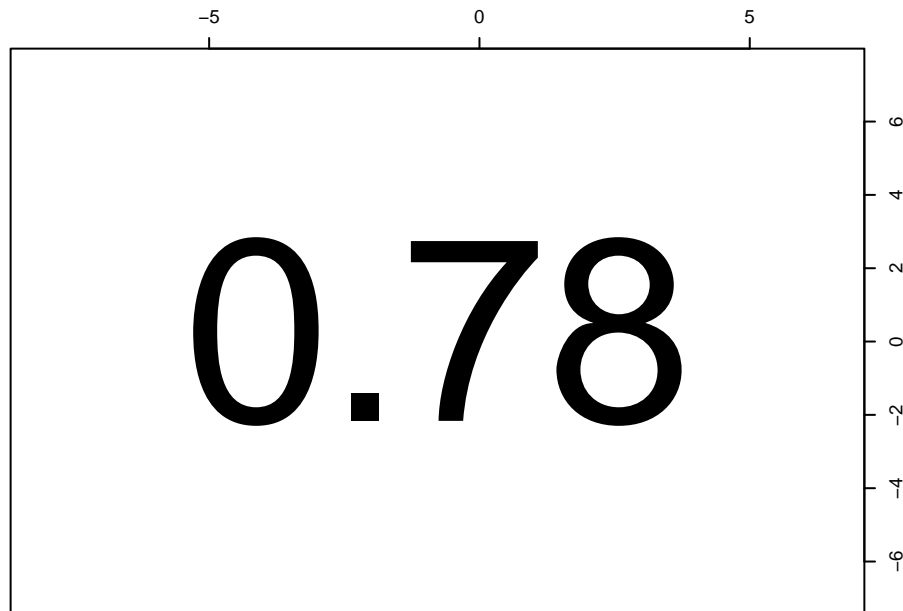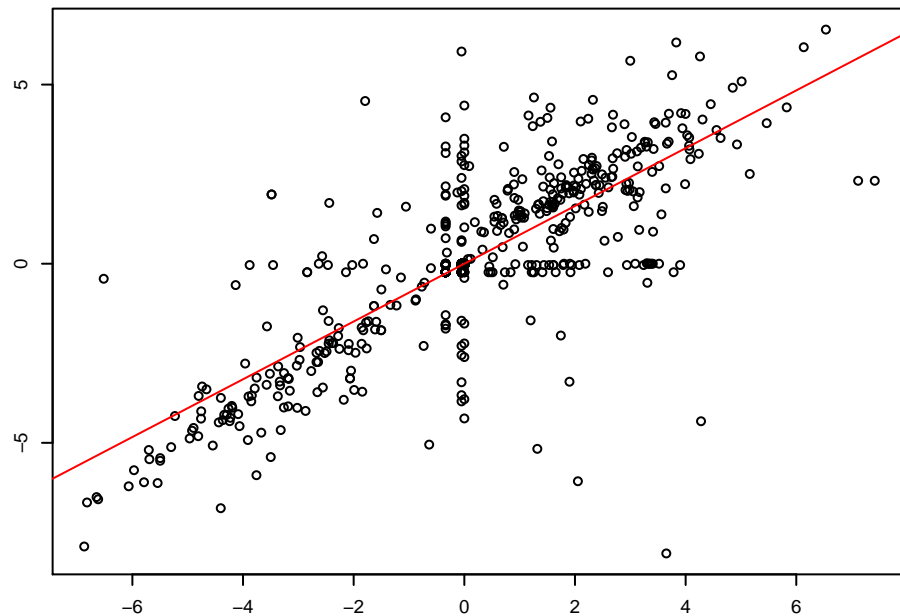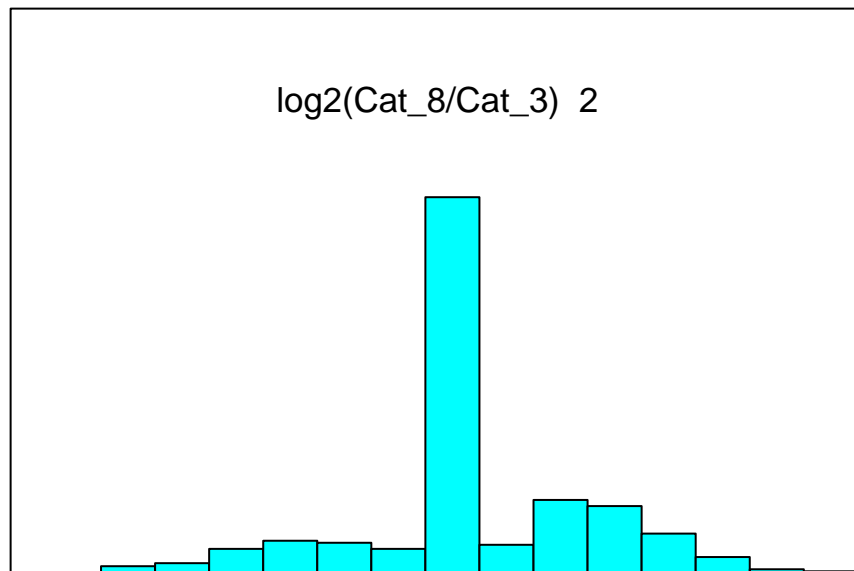

Supplement: supp [file elife-75798-supp-v1.zip]

MA plot

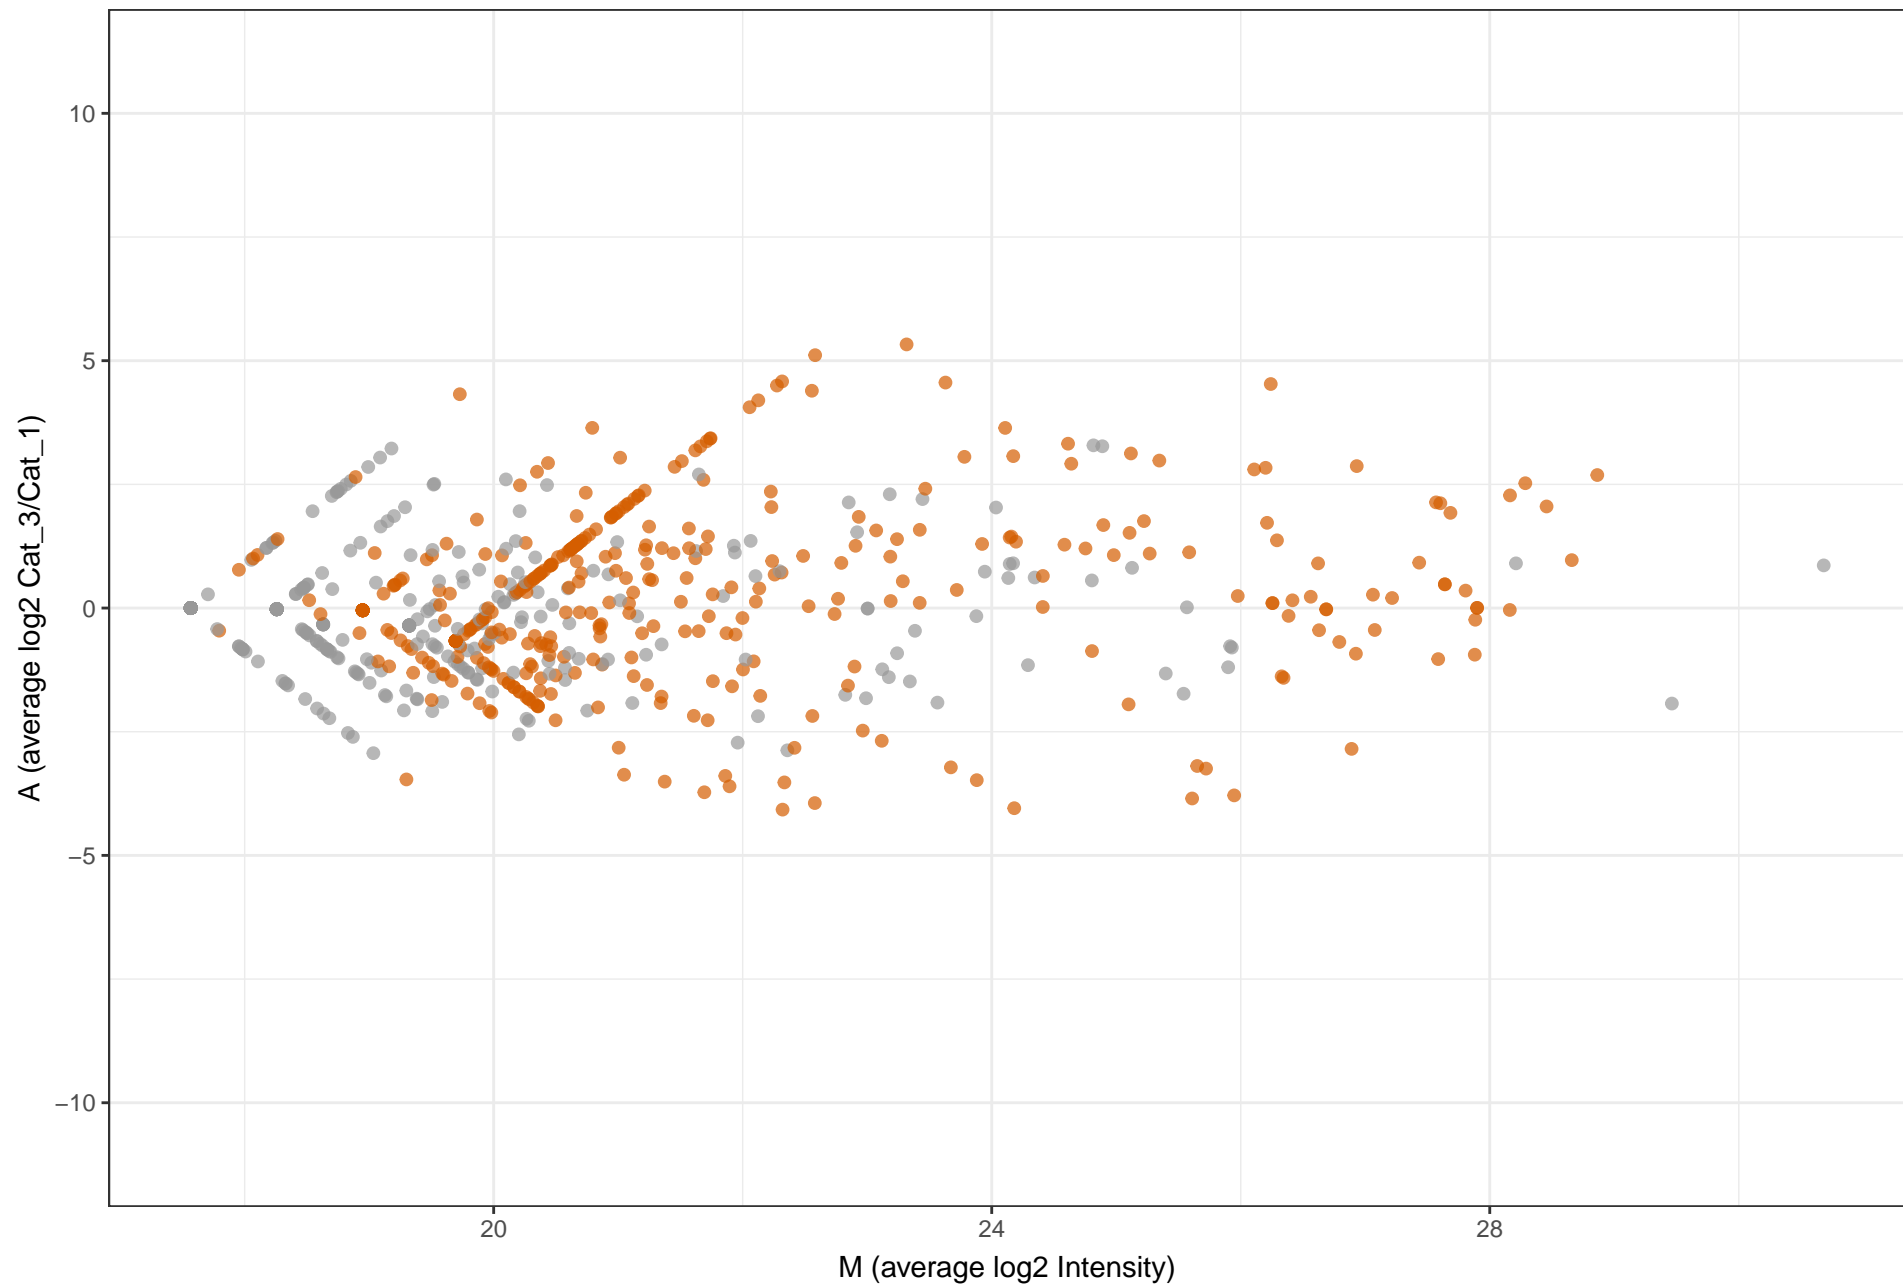

Supplement: supp [file elife-75798-supp-v1.zip]

P-value vs Fold change

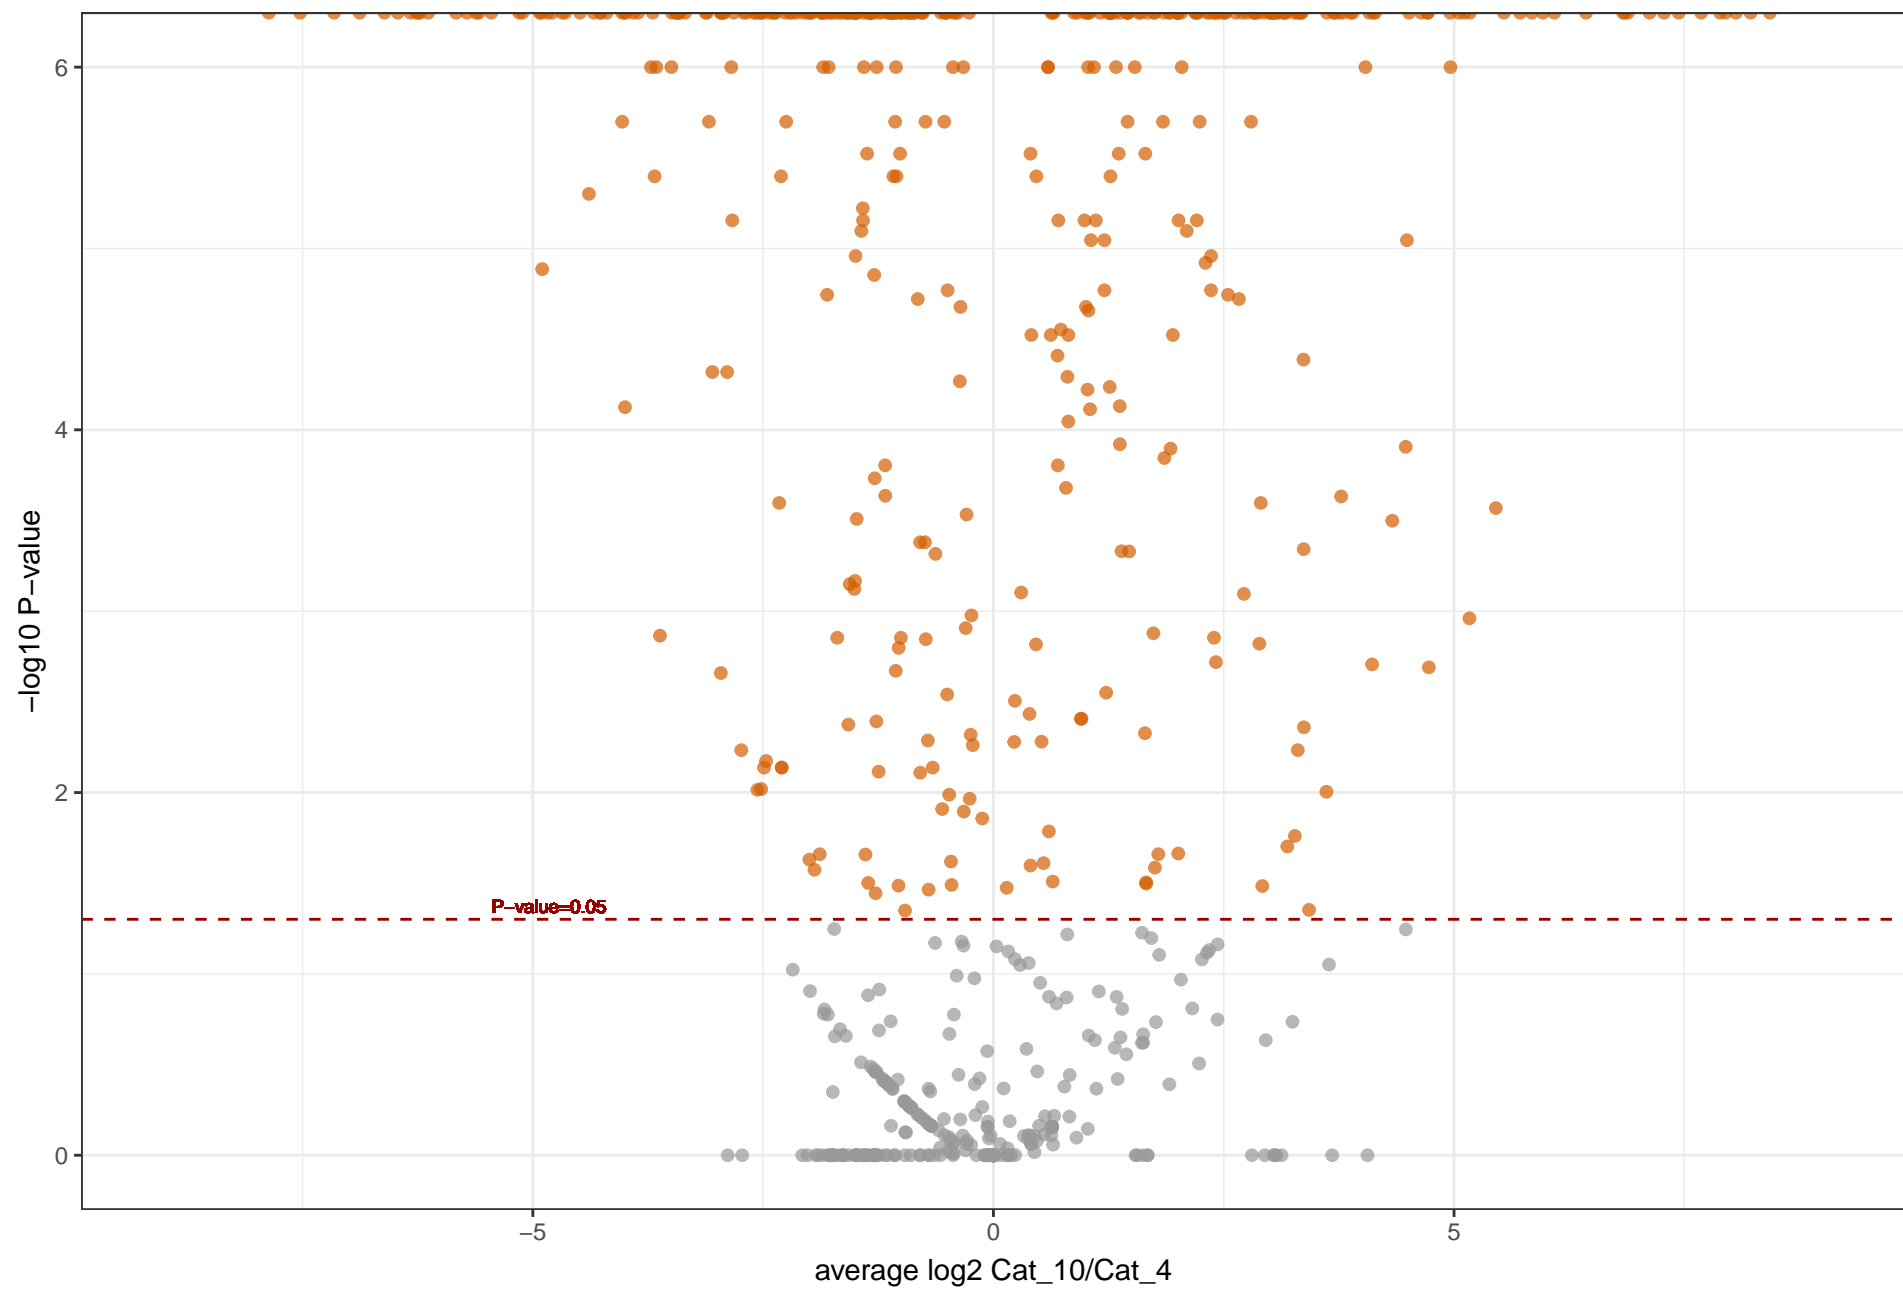

Supplement: supp [file elife-75798-supp-v1.zip]

MA plot

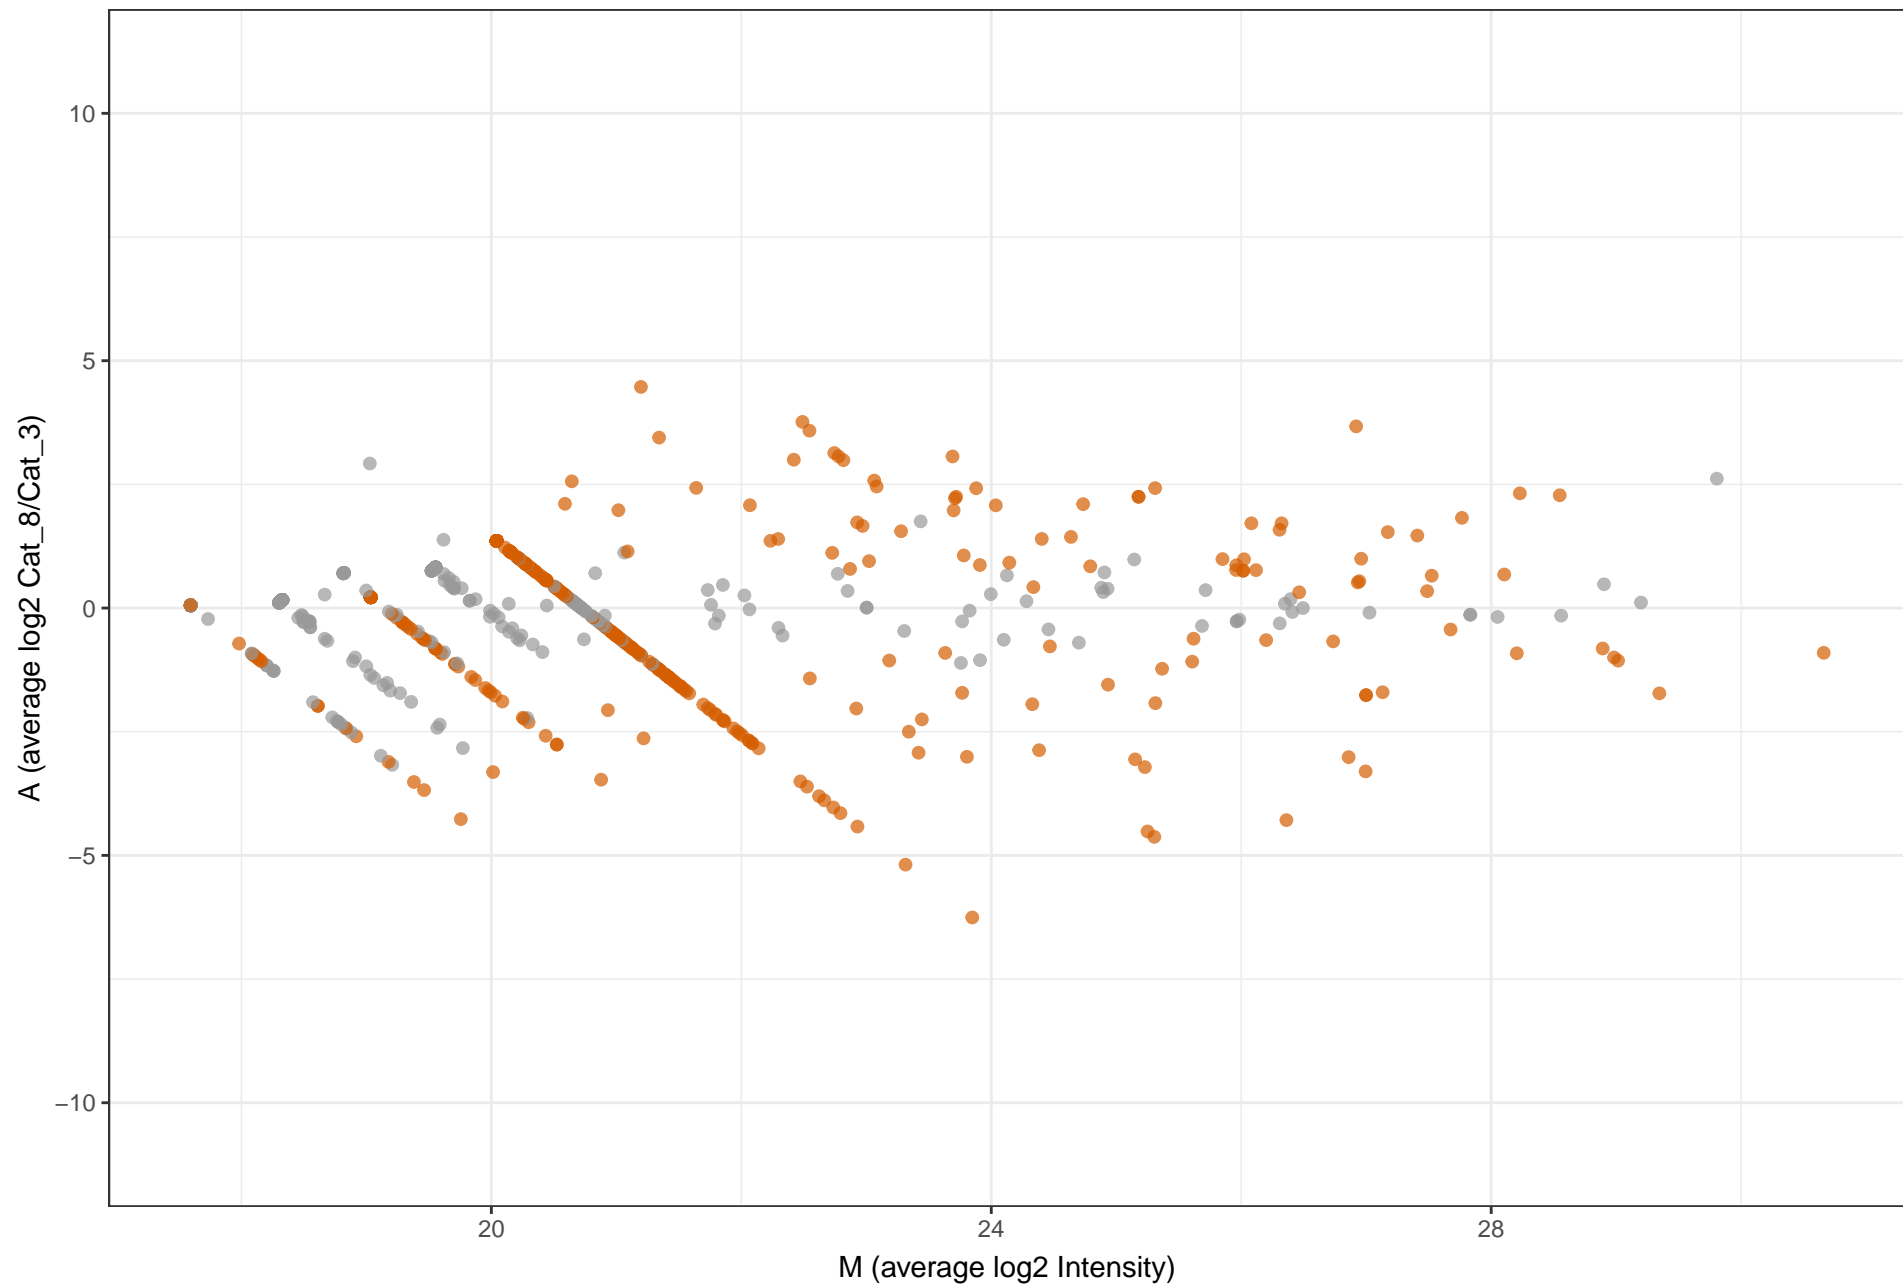

Supplement: supp [file elife-75798-supp-v1.zip]

Value-ordered fold change

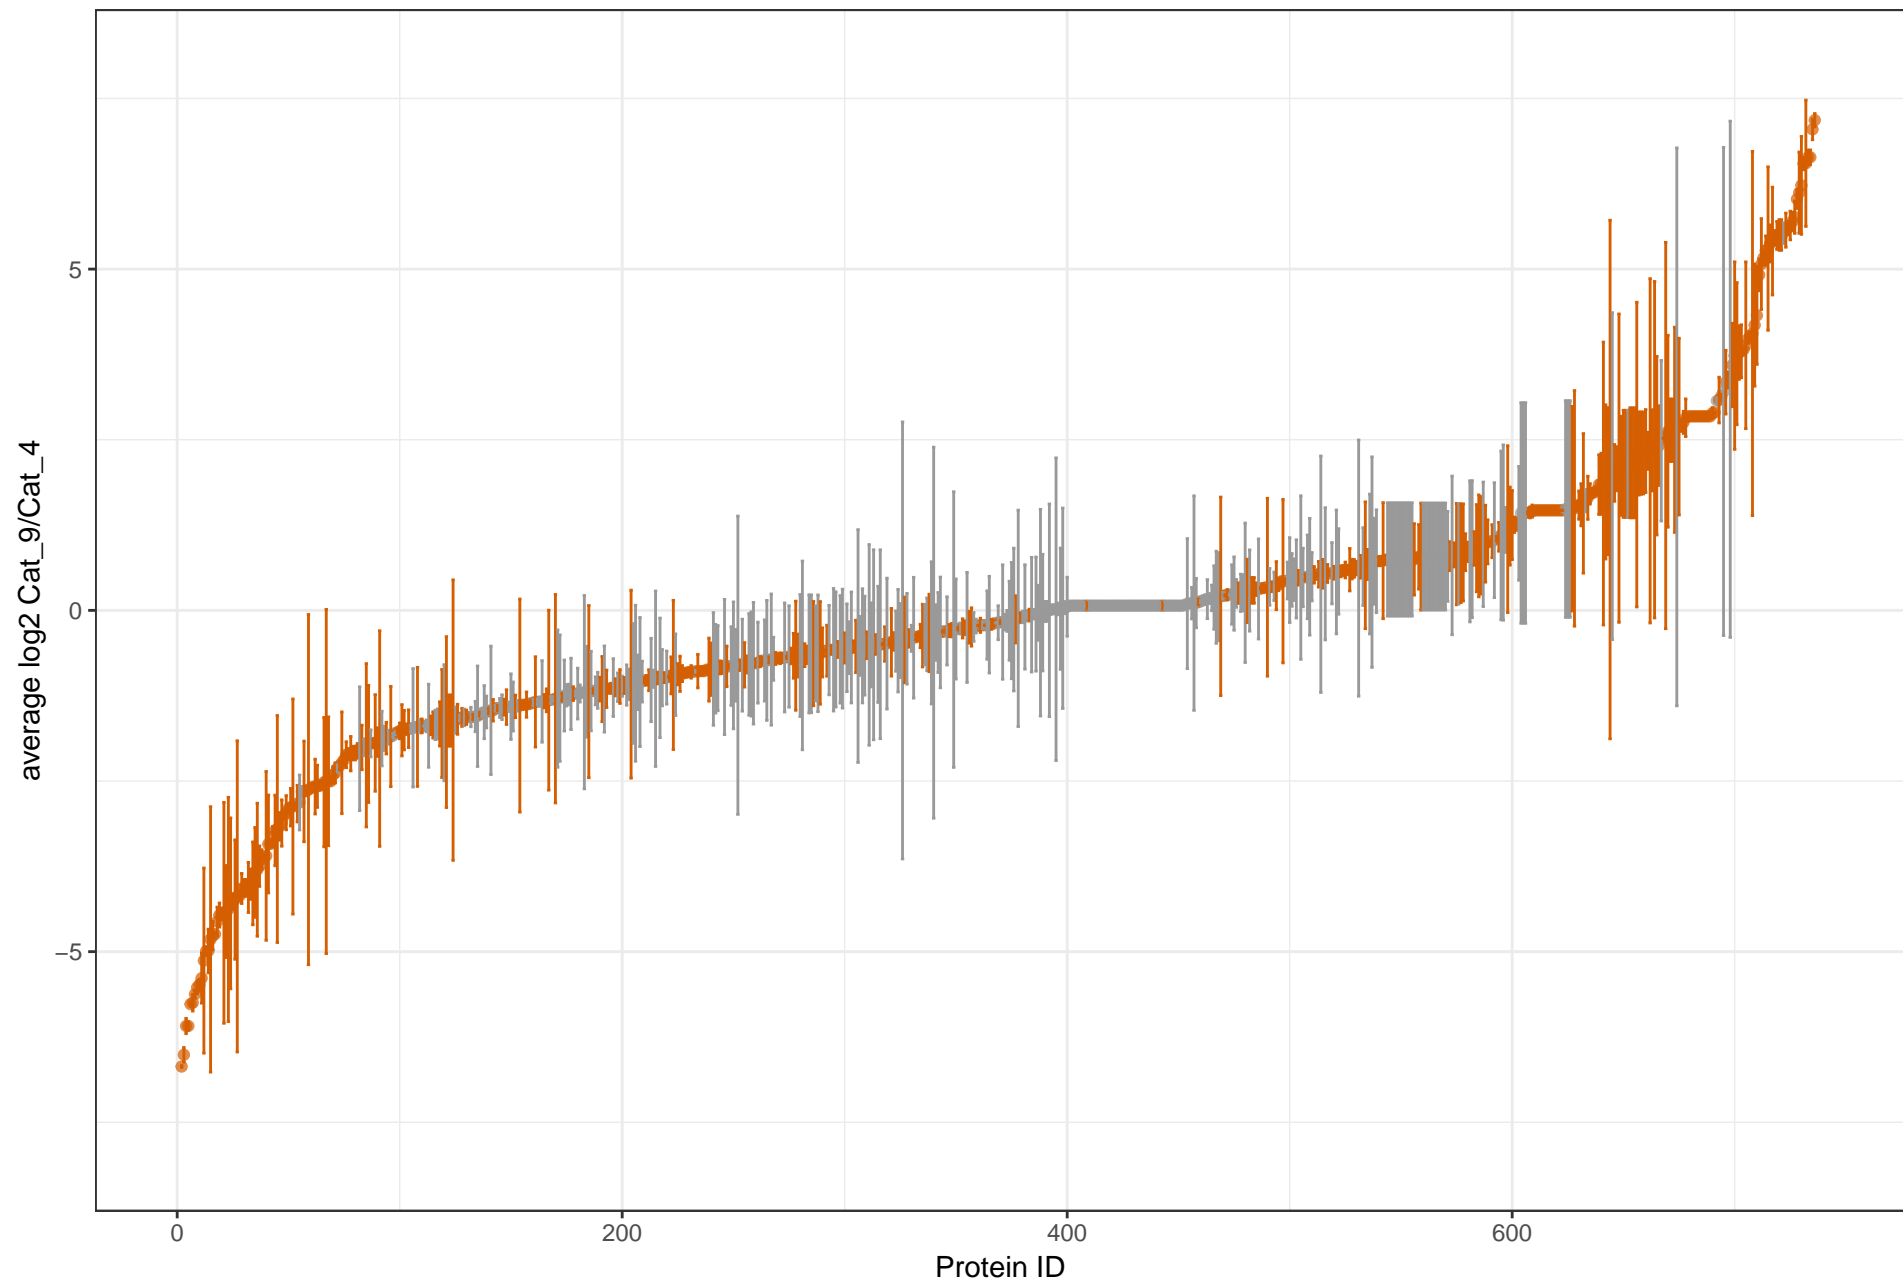

Supplement: supp [file elife-75798-supp-v1.zip]

MA plot

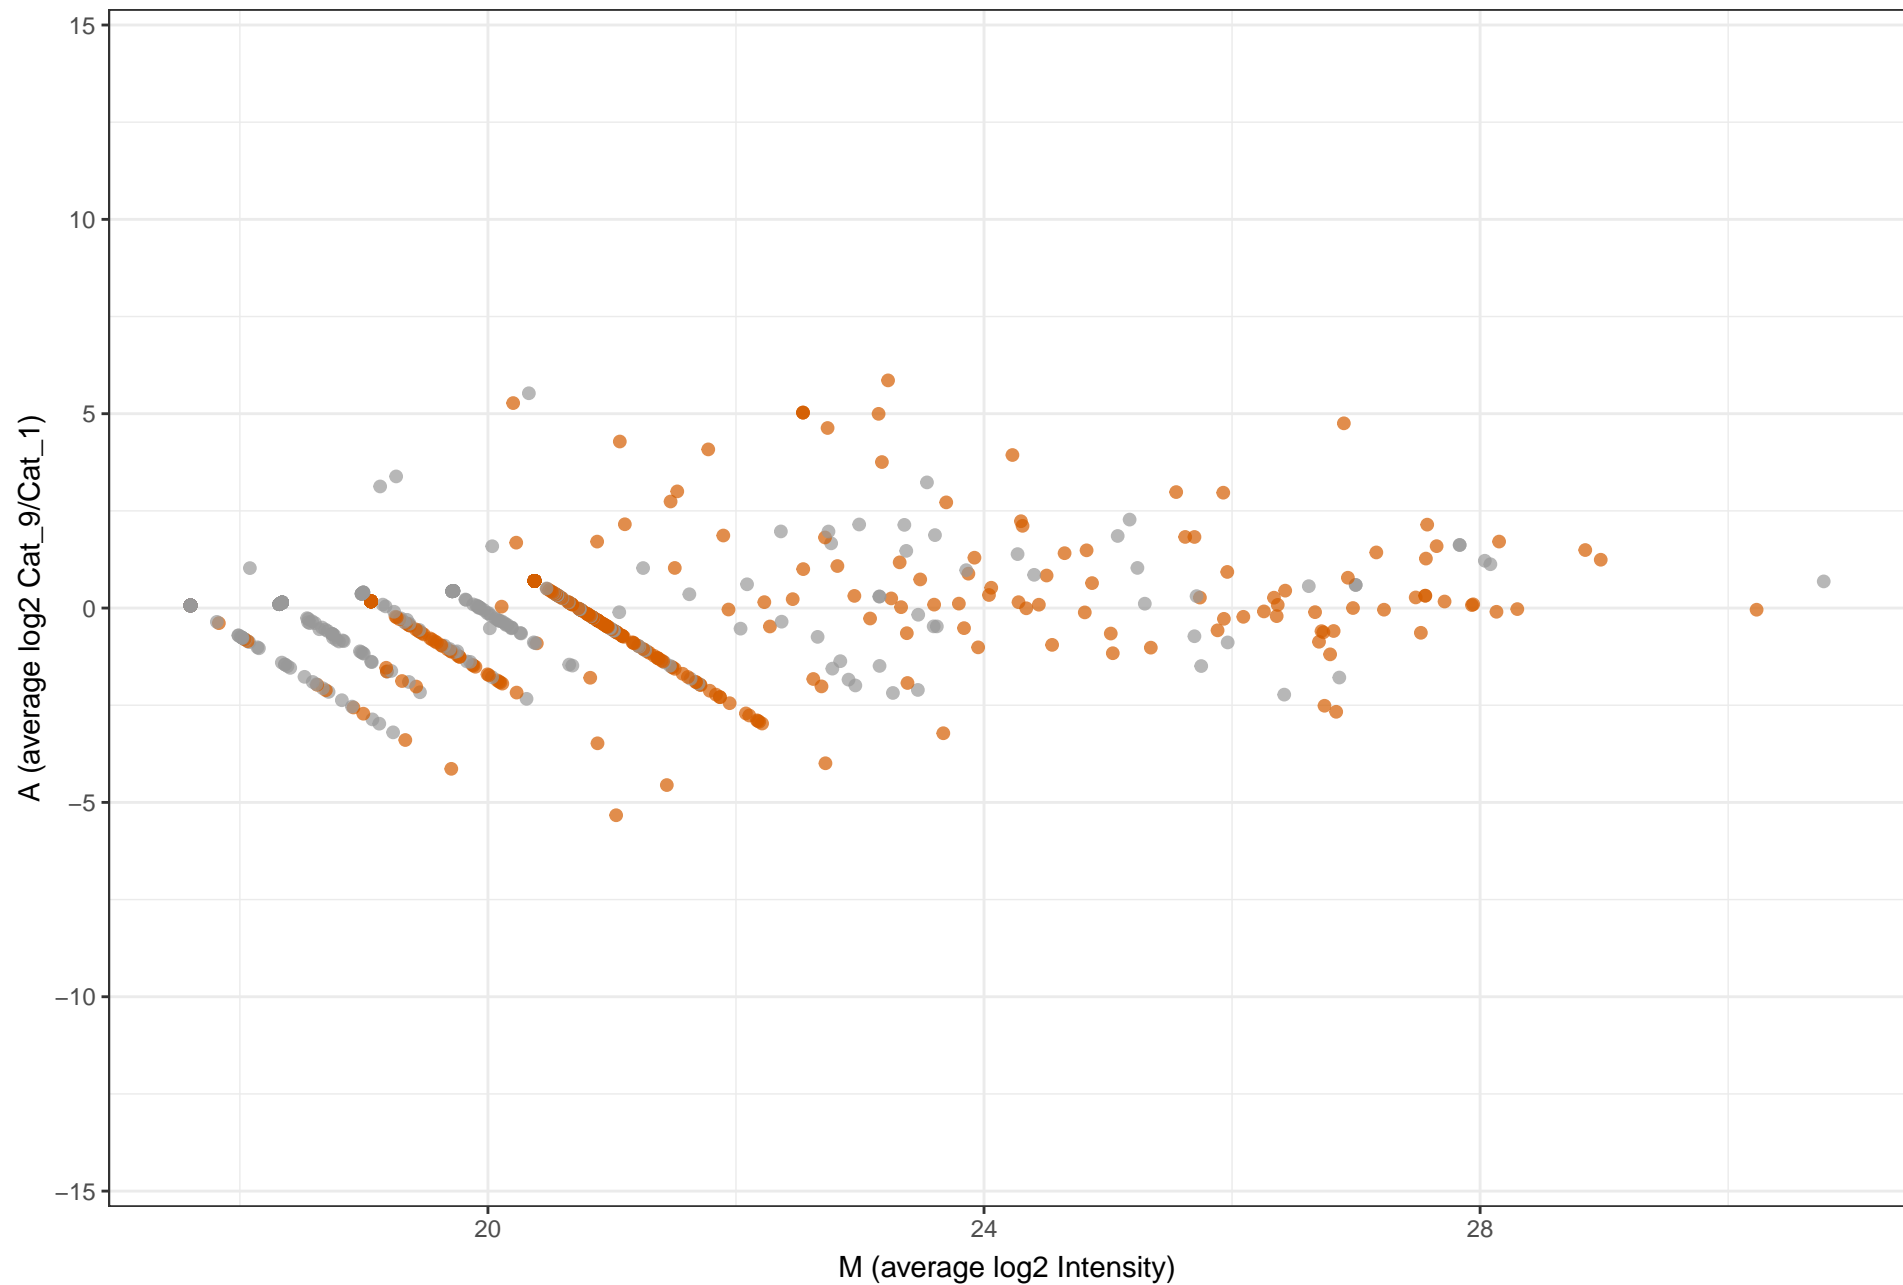

Supplement: supp [file elife-75798-supp-v1.zip]

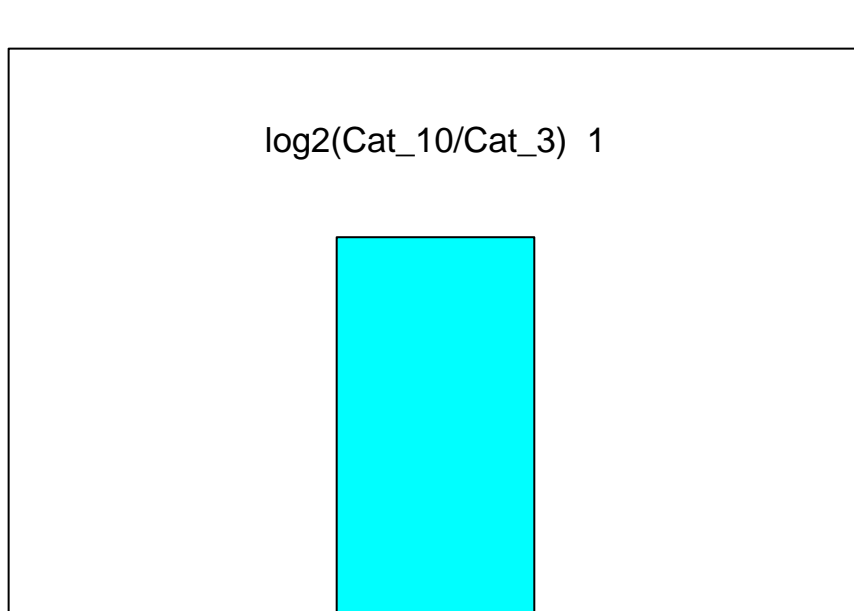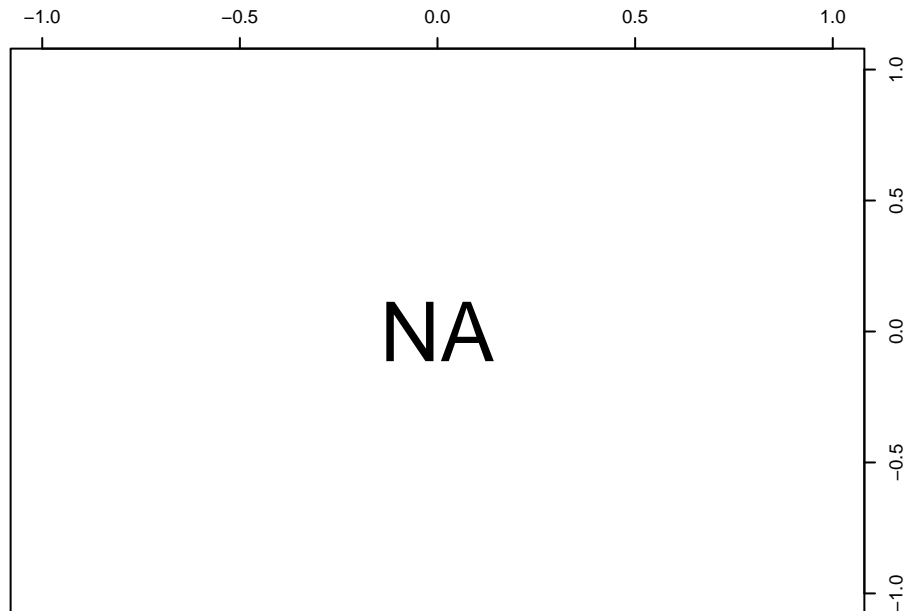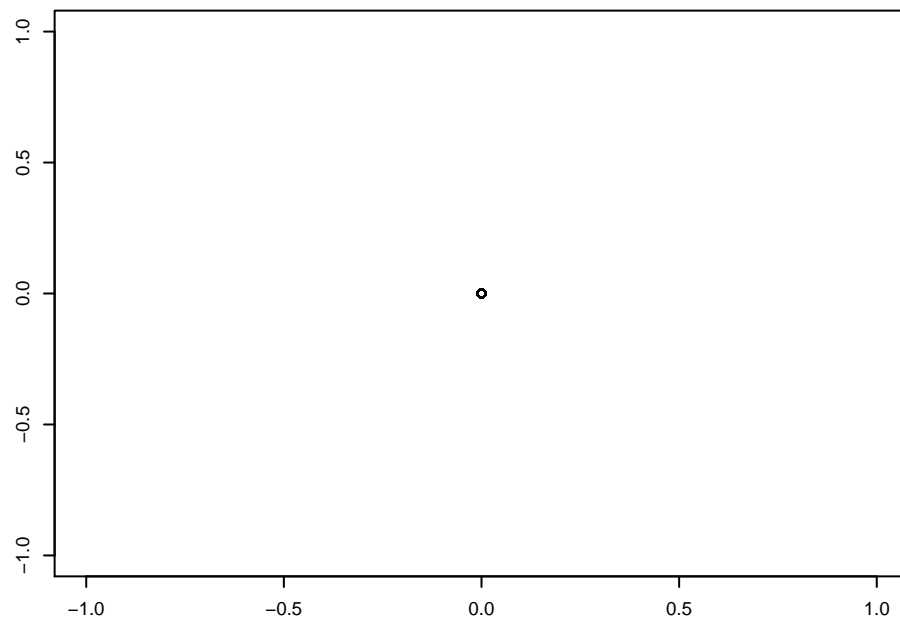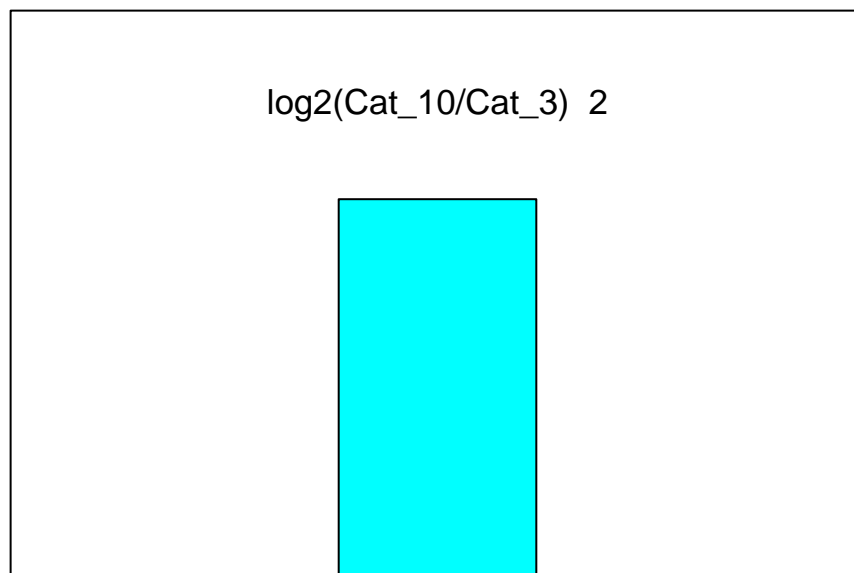

Supplement: supp [file elife-75798-supp-v1.zip]

MA plot

A (average log2 Cat\_10/Cat\_5)

10  
5  
0  
-5  
-10

20

24

28

M (average log2 Intensity)

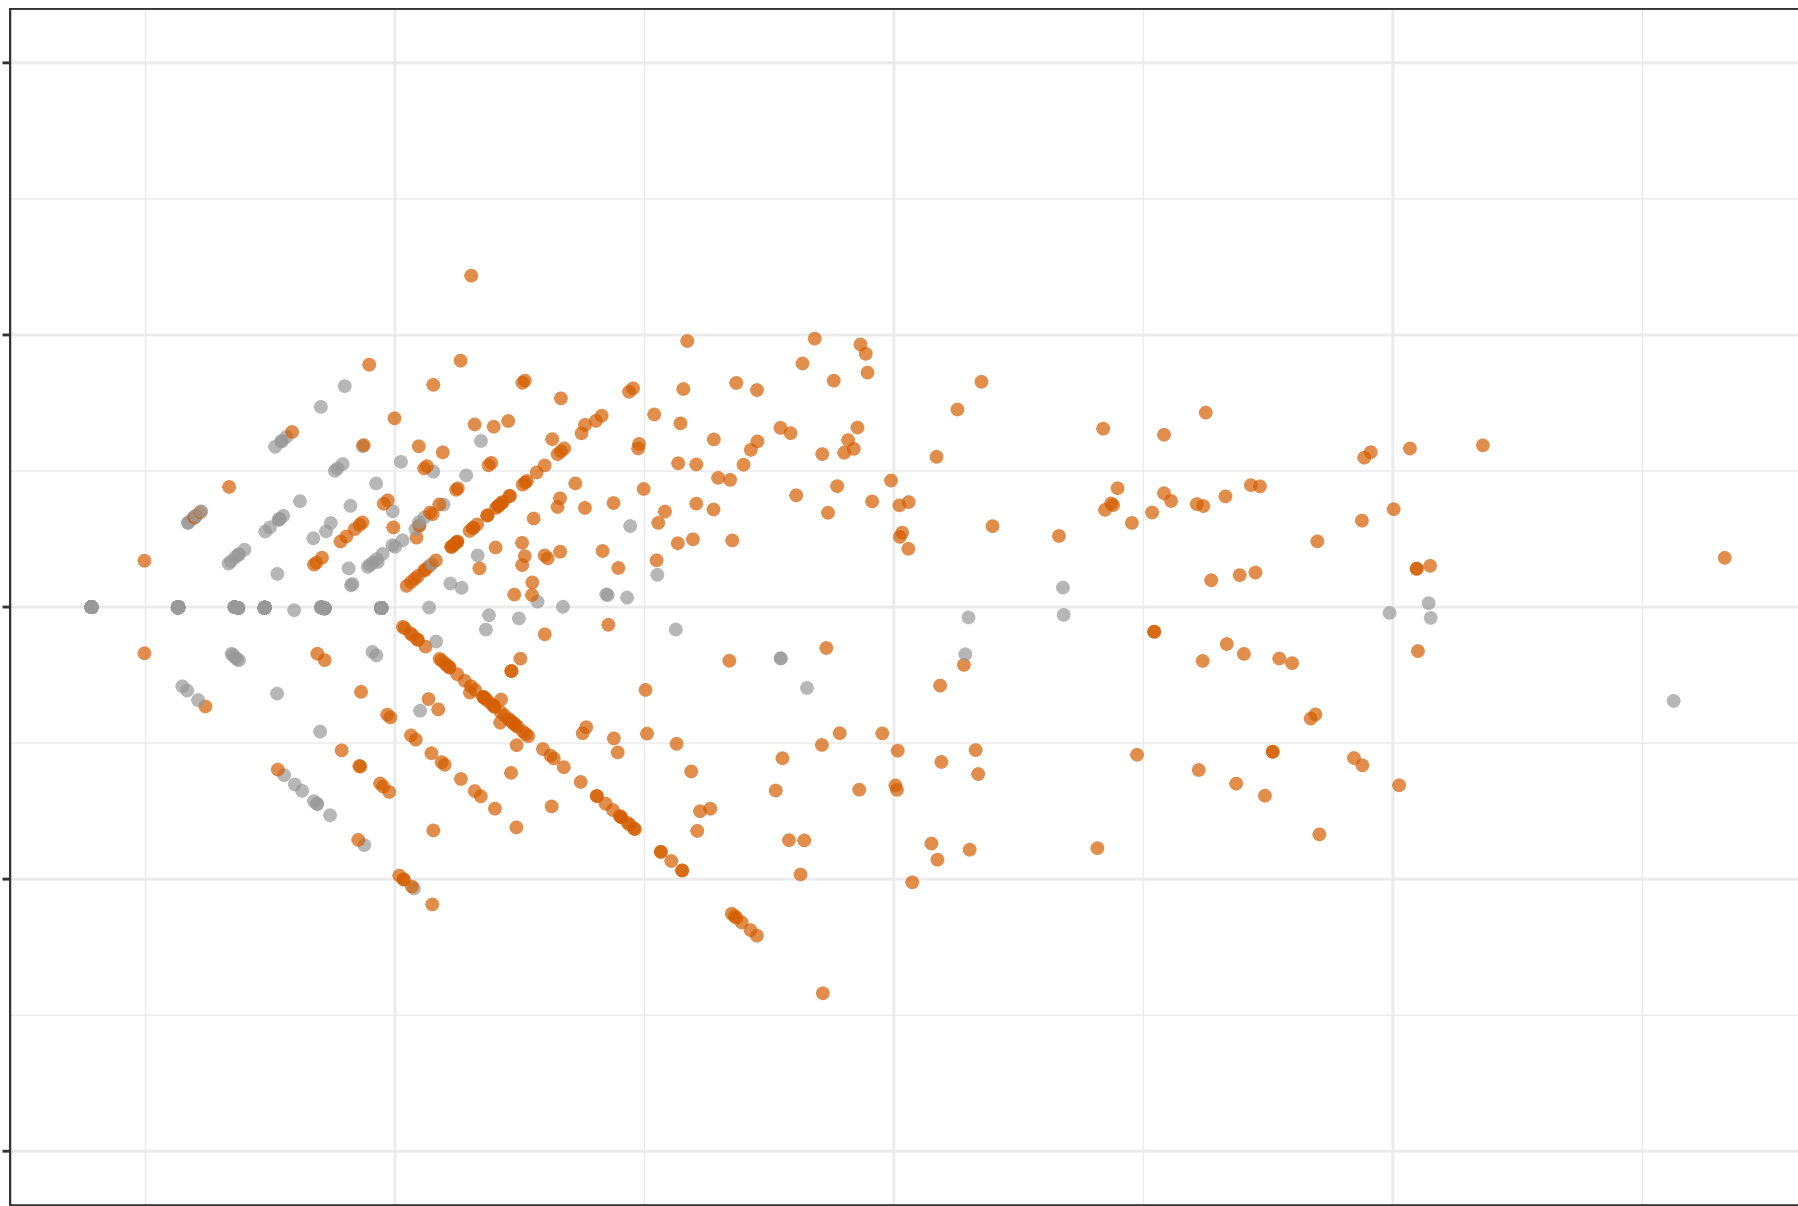

Supplement: supp [file elife-75798-supp-v1.zip]

Value-ordered fold change

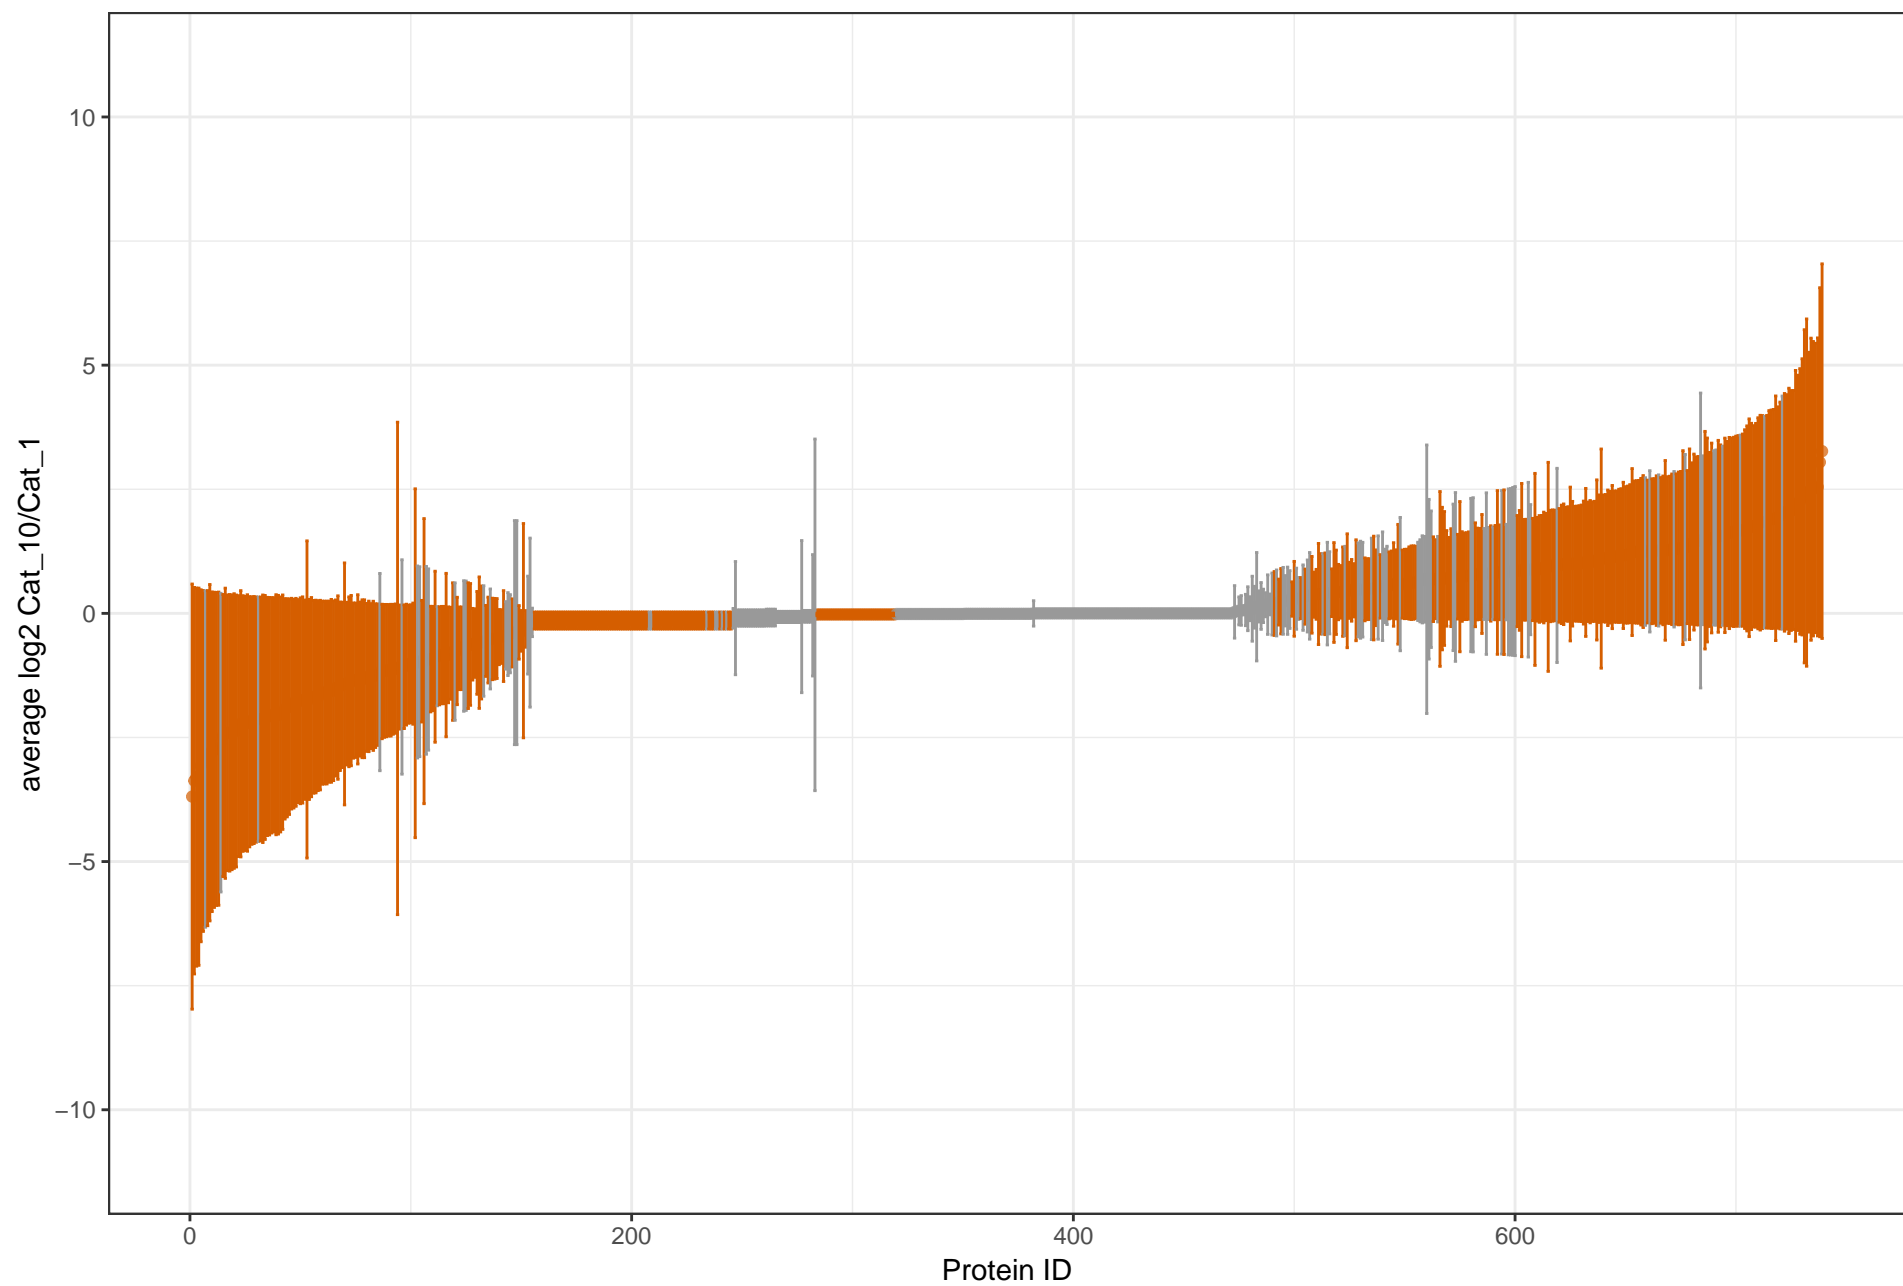

Supplement: supp [file elife-75798-supp-v1.zip]

Value-ordered fold change

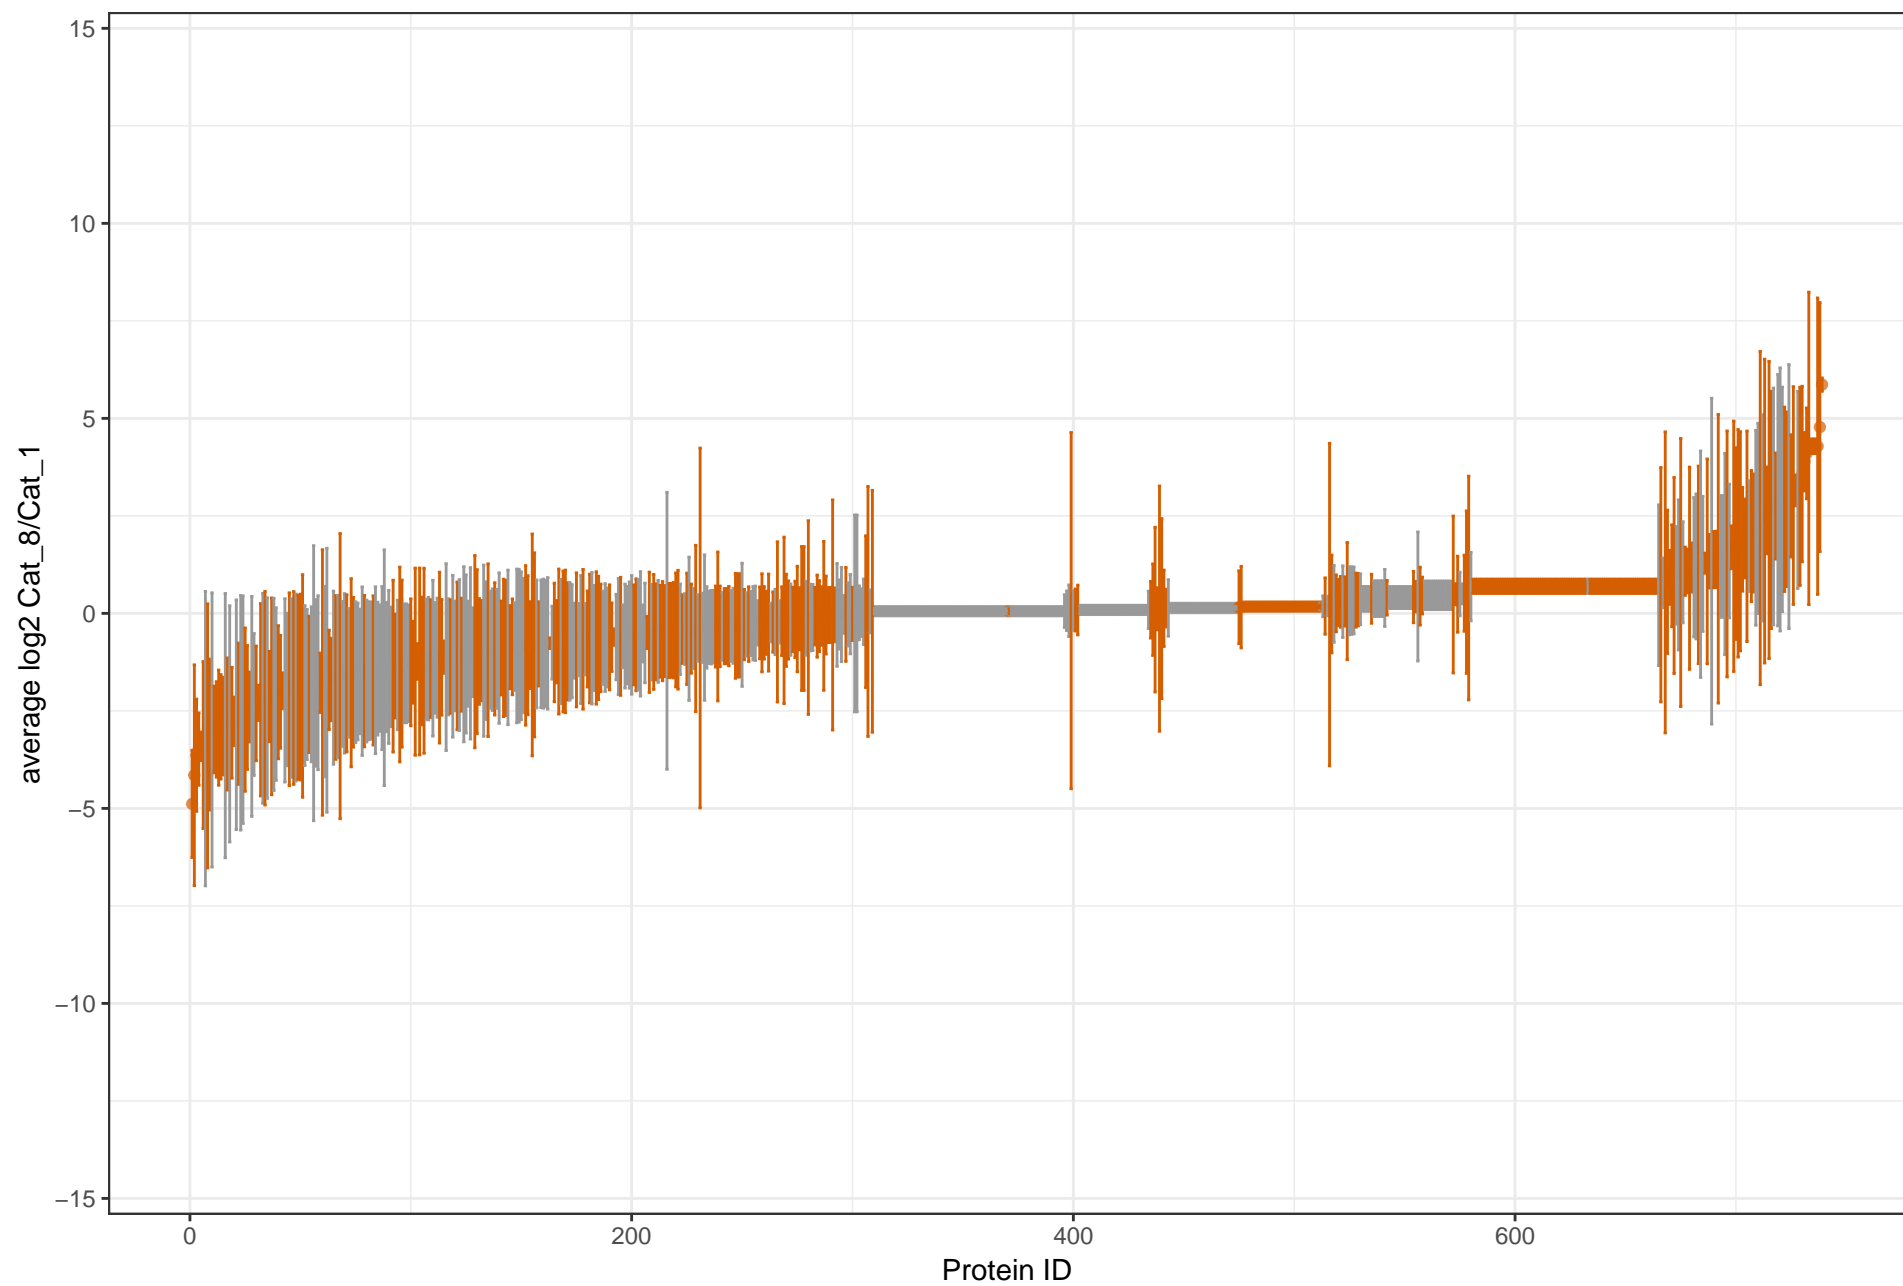

Supplement: supp [file elife-75798-supp-v1.zip]
